# Supplementary material for: Filling knowledge gaps in insect conservation by leveraging genetic data from public archives
Source: Oxford University Press journal article supplement (doi:10.1093/database/baae002), 2024-01-01
Supplement: baae002_supp.zip [file baae002_supp.zip]

Appendix\_1\_Data\_short\_Sequences;;;;;

order\_name;family\_name;genus\_name;species\_name;country;sourceDatabase;processid;genbank\_accession

Hymenoptera;Apidae;Andrena;Andrena ovatula;Germany;Bolder;HYMAA315-22;-  
Hymenoptera;Apidae;Andrena;Andrena ovatula;United Kingdom;Bolder;HYMAA317-22;-  
Hymenoptera;Colletidae;Colletes;Colletes floralis;Ireland;GenBank;-;EF137744  
Hymenoptera;Colletidae;Colletes;Colletes floralis;Ireland;GenBank;-;EF137746  
Hymenoptera;Colletidae;Colletes;Colletes floralis;Ireland;GenBank;-;EF137748  
Hymenoptera;Colletidae;Colletes;Colletes floralis;Ireland;GenBank;-;FJ041149  
Hymenoptera;Colletidae;Colletes;Colletes floralis;Ireland;GenBank;-;FJ041150  
Hymenoptera;Halictidae;Lasioglossum;Lasioglossum intermedium;Germany;Bolder;FBAPD659-11;-  
Lepidoptera;Nymphalidae;Boloria;Boloria graeca;France;GenBank;-;MT916670  
Lepidoptera;Nymphalidae;Boloria;Boloria napaea;Sweden;GenBank;-;MT916665  
Lepidoptera;Nymphalidae;Boloria;Boloria napaea;Sweden;GenBank;-;MT916664  
Lepidoptera;Nymphalidae;Boloria;Boloria pales;Austria;GenBank;-;MT916668  
Lepidoptera;Nymphalidae;Boloria;Boloria pales;Austria;GenBank;-;MT916667  
Lepidoptera;Nymphalidae;Boloria;Boloria pales;Slovenia;GenBank;-;MT916666  
Lepidoptera;Lycaenidae;Callophrys;Callophrys rubi;Croatia;GenBank;-;MZ124262  
Lepidoptera;Lycaenidae;Callophrys;Callophrys rubi;Croatia;GenBank;-;MZ104897  
Lepidoptera;Lycaenidae;Callophrys;Callophrys rubi;Croatia;GenBank;-;MZ119987  
Lepidoptera;Lycaenidae;Callophrys;Callophrys rubi;Croatia;GenBank;-;MZ106550  
Lepidoptera;Lycaenidae;Callophrys;Callophrys rubi;Croatia;GenBank;-;MZ106685  
Lepidoptera;Lycaenidae;Callophrys;Callophrys rubi;Croatia;GenBank;-;MZ106753  
Lepidoptera;Lycaenidae;Callophrys;Callophrys rubi;Croatia;GenBank;-;MZ124191  
Lepidoptera;Lycaenidae;Callophrys;Callophrys rubi;Croatia;GenBank;-;MZ105417  
Lepidoptera;Lycaenidae;Callophrys;Callophrys rubi;Croatia;GenBank;-;MZ102574  
Lepidoptera;Lycaenidae;Callophrys;Callophrys rubi;Croatia;GenBank;-;MZ102849  
Lepidoptera;Lycaenidae;Callophrys;Callophrys rubi;Croatia;GenBank;-;MZ102923  
Lepidoptera;Lycaenidae;Callophrys;Callophrys rubi;Croatia;GenBank;-;MZ125347  
Lepidoptera;Lycaenidae;Callophrys;Callophrys rubi;Croatia;GenBank;-;MZ106887  
Lepidoptera;Lycaenidae;Callophrys;Callophrys rubi;Croatia;GenBank;-;MZ125784  
Lepidoptera;Lycaenidae;Callophrys;Callophrys rubi;Croatia;GenBank;-;MZ104519  
Lepidoptera;Lycaenidae;Callophrys;Callophrys rubi;Croatia;GenBank;-;MZ104760  
Lepidoptera;Lycaenidae;Callophrys;Callophrys rubi;Croatia;GenBank;-;MZ124932  
Lepidoptera;Lycaenidae;Callophrys;Callophrys rubi;Croatia;GenBank;-;MZ125924  
Lepidoptera;Lycaenidae;Callophrys;Callophrys rubi;Croatia;GenBank;-;MZ125989  
Lepidoptera;Lycaenidae;Callophrys;Callophrys rubi;Croatia;GenBank;-;MZ122750  
Lepidoptera;Lycaenidae;Callophrys;Callophrys rubi;Croatia;GenBank;-;MZ107025  
Lepidoptera;Lycaenidae;Callophrys;Callophrys rubi;Croatia;GenBank;-;MZ118754  
Lepidoptera;Lycaenidae;Callophrys;Callophrys rubi;Croatia;GenBank;-;MZ117954  
Lepidoptera;Lycaenidae;Callophrys;Callophrys rubi;Croatia;GenBank;-;MZ121326  
Lepidoptera;Lycaenidae;Callophrys;Callophrys rubi;Croatia;GenBank;-;MZ121465  
Lepidoptera;Lycaenidae;Callophrys;Callophrys rubi;Croatia;GenBank;-;MZ121737  
Lepidoptera;Lycaenidae;Callophrys;Callophrys rubi;Croatia;GenBank;-;MZ119045  
Lepidoptera;Lycaenidae;Callophrys;Callophrys rubi;Croatia;GenBank;-;MZ119339  
Lepidoptera;Lycaenidae;Callophrys;Callophrys rubi;Croatia;GenBank;-;MZ113765  
Lepidoptera;Lycaenidae;Callophrys;Callophrys rubi;Croatia;GenBank;-;MZ113403  
Lepidoptera;Lycaenidae;Callophrys;Callophrys rubi;Croatia;GenBank;-;MZ113187  
Lepidoptera;Lycaenidae;Callophrys;Callophrys rubi;Croatia;GenBank;-;MZ113037  
Lepidoptera;Lycaenidae;Callophrys;Callophrys rubi;Croatia;GenBank;-;MZ112668  
Lepidoptera;Lycaenidae;Callophrys;Callophrys rubi;Croatia;GenBank;-;MZ114797  
Lepidoptera;Lycaenidae;Callophrys;Callophrys rubi;Croatia;GenBank;-;MZ114728  
Lepidoptera;Lycaenidae;Callophrys;Callophrys rubi;Croatia;GenBank;-;MZ114437  
Lepidoptera;Lycaenidae;Callophrys;Callophrys rubi;Croatia;GenBank;-;MZ114223  
Lepidoptera;Lycaenidae;Callophrys;Callophrys rubi;Croatia;GenBank;-;MZ115690  
Lepidoptera;Lycaenidae;Callophrys;Callophrys rubi;Croatia;GenBank;-;MZ110398  
Lepidoptera;Lycaenidae;Callophrys;Callophrys rubi;Croatia;GenBank;-;MZ109964  
Lepidoptera;Lycaenidae;Callophrys;Callophrys rubi;Croatia;GenBank;-;MZ111047  
Lepidoptera;Lycaenidae;Callophrys;Callophrys rubi;Croatia;GenBank;-;MZ117312  
Lepidoptera;Lycaenidae;Callophrys;Callophrys rubi;Croatia;GenBank;-;MZ116391  
Lepidoptera;Lycaenidae;Callophrys;Callophrys rubi;Croatia;GenBank;-;MZ116051  
Lepidoptera;Lycaenidae;Callophrys;Callophrys rubi;Croatia;GenBank;-;MZ116465  
Lepidoptera;Pieridae;Colias;Colias alfacariensis;Italy;Bolder;LEATG525-14;-  
Lepidoptera;Nymphalidae;Euphydryas;Euphydryas aurinia;France;GenBank;-;AY491813  
Lepidoptera;Nymphalidae;Euphydryas;Euphydryas aurinia;France;GenBank;-;AY491809  
Lepidoptera;Nymphalidae;Maniola;Maniola jurtina;France;GenBank;-;KT264272  
Lepidoptera;Nymphalidae;Melanargia;Melanargia galathea;Italy;Bolder;VNMB808-09;-  
Lepidoptera;Nymphalidae;Melanargia;Melanargia galathea;Italy;Bolder;VNMB807-09;-  
Lepidoptera;Nymphalidae;Melanargia;Melanargia galathea;Italy;Bolder;VNMB814-09;-  
Lepidoptera;Nymphalidae;Melanargia;Melanargia galathea;Italy;Bolder;VNMB810-09;-  
Lepidoptera;Nymphalidae;Melanargia;Melanargia galathea;Italy;Bolder;VNMB809-09;-  
Lepidoptera;Nymphalidae;Melitaea;Melitaea cinxia;Finland;GenBank;-;AM041061  
Lepidoptera;Nymphalidae;Melitaea;Melitaea cinxia;Finland;GenBank;-;AM041063  
Lepidoptera;Nymphalidae;Melitaea;Melitaea cinxia;Finland;GenBank;-;JX878561  
Lepidoptera;Nymphalidae;Nymphalis;Nymphalis io;Czech Republic;GenBank;-;MZ440841  
Lepidoptera;Papilionidae;Parnassius;Parnassius apollo;France;GenBank;-;AY491909  
Lepidoptera;Papilionidae;Parnassius;Parnassius apollo;France;GenBank;-;AY491932  
Lepidoptera;Papilionidae;Parnassius;Parnassius apollo;Spain;GenBank;-;HG798923

Lepidoptera;Papilionidae;Parnassius;Parnassius apollo;Spain;GenBank;-;HG798922  
Lepidoptera;Papilionidae;Parnassius;Parnassius apollo;Spain;GenBank;-;HG779448  
Lepidoptera;Papilionidae;Parnassius;Parnassius apollo;Spain;GenBank;-;HG779452  
Lepidoptera;Papilionidae;Parnassius;Parnassius apollo;Spain;GenBank;-;HG779449  
Odonata;Libellulidae;Sympetrum;Sympetrum striolatum;Montenegro;Bolder;AODON787-20;-  
Coleoptera;Cerambycidae;Aegomorphus;Aegomorphus clavipes;Finland;Bolder;COLFG013-13;-  
Coleoptera;Cerambycidae;Aegomorphus;Aegomorphus clavipes;Finland;Bolder;COLFG011-13;-  
Coleoptera;Elateridae;Ampedus;Ampedus pomorum;France;Bolder;PSFOR531-13;-  
Coleoptera;Apocy-ceae;Anisotoma;Anisotoma castanea;Germany;Bolder;FBCOH511-12;-  
Coleoptera;Apocy-ceae;Anisotoma;Anisotoma castanea;Germany;Bolder;FBCOE929-12;-  
Coleoptera;Apocy-ceae;Anisotoma;Anisotoma humeralis;Germany;Bolder;FBCOG334-12;-  
Coleoptera;Curculionidae;Cryptorhynchus;Cryptorhynchus lapathi;Norway;Bolder;COLHH1562-18;-  
Coleoptera;Nitidulidae;Cychramus;Cychramus luteus;Austria;Bolder;ANIT015-20;-  
Coleoptera;Nitidulidae;Cychramus;Cychramus luteus;Austria;Bolder;ANIT002-20;-  
Coleoptera;Nitidulidae;Cychramus;Cychramus luteus;Austria;Bolder;ANIT008-20;-  
Coleoptera;Nitidulidae;Cychramus;Cychramus luteus;Austria;Bolder;ANIT024-20;-  
Coleoptera;Nitidulidae;Cychramus;Cychramus luteus;Austria;Bolder;ANIT011-20;-  
Coleoptera;Nitidulidae;Cychramus;Cychramus luteus;Austria;Bolder;ANIT009-20;-  
Coleoptera;Nitidulidae;Cychramus;Cychramus luteus;Austria;Bolder;ANIT010-20;-  
Coleoptera;Nitidulidae;Cychramus;Cychramus luteus;Austria;Bolder;ANIT021-20;-  
Coleoptera;Nitidulidae;Cychramus;Cychramus luteus;Austria;Bolder;ANIT025-20;-  
Coleoptera;Nitidulidae;Cychramus;Cychramus luteus;Austria;Bolder;ANIT023-20;-  
Coleoptera;Nitidulidae;Cychramus;Cychramus variegatus;Austria;Bolder;ANIT019-20;-  
Coleoptera;Nitidulidae;Cychramus;Cychramus variegatus;Austria;Bolder;ANIT006-20;-  
Coleoptera;Nitidulidae;Cychramus;Cychramus variegatus;Austria;Bolder;ANIT007-20;-  
Coleoptera;Nitidulidae;Cychramus;Cychramus variegatus;Austria;Bolder;ANIT020-20;-  
Coleoptera;Nitidulidae;Cychramus;Cychramus variegatus;Austria;Bolder;ANIT018-20;-  
Coleoptera;Lymexylidae;Lymexylon;Lymexylon navale;Germany;Bolder;GBCOD790-13;-  
Coleoptera;Cerambycidae;Oberea;Oberea oculata;Finland;Bolder;COLFG012-13;-  
Coleoptera;Peltidae;Peltis;Peltis grossa;Finland;Bolder;COLFG092-13;-  
Coleoptera;Histeridae;Plegaderus;Plegaderus caesus;Germany;Bolder;FBCOF497-12;-  
Coleoptera;Scarabaeidae;Protaetia;Protaetia cuprea;France;Bolder;PSFOR248-13;-  
Coleoptera;Cerambycidae;Rhamnusium;Rhamnusium bicolor;Finland;Bolder;COLFG008-13;-  
Coleoptera;Salpingidae;Salpingus;Salpingus ruficollis;France;GenBank;-;KM286067  
Coleoptera;Curculionidae;Scolytus;Scolytus intricatus;Finland;Bolder;COLFG084-13;-  
Coleoptera;Curculionidae;Scolytus;Scolytus intricatus;Finland;Bolder;COLFG083-13;-  
Coleoptera;Elateridae;Ste-gostus;Ste-gostus rhombeus;Germany;Bolder;FBCOE298-12;-  
Coleoptera;Cerambycidae;Tetropium;Tetropium fuscum;Finland;Bolder;COLFG072-13;-  
Coleoptera;Cerambycidae;Tetropium;Tetropium fuscum;Finland;Bolder;COLFG071-13;-  
;;;;;

Appendix\_2\_Data\_without\_Coordinates;;;;;

order\_name;family\_name;genus\_name;species\_name;country;sourceDatabase;processid;genbank\_accession

Hymenoptera;Halictidae;Lasioglossum;Lasioglossum majus;France;GenBank;NA;AF104653  
Hymenoptera;Colletidae;Colletes;Colletes albomaculatus;Greece;GenBank;NA;EF028492  
Hymenoptera;Colletidae;Colletes;Colletes collaris;Austria;GenBank;NA;EF028495  
Hymenoptera;Colletidae;Colletes;Colletes fodiens;Switzerland;GenBank;NA;EF028504  
Hymenoptera;Colletidae;Colletes;Colletes foveolaris;Spain;GenBank;NA;EF028506  
Hymenoptera;Colletidae;Colletes;Colletes graeffei;Austria;GenBank;NA;EF028508  
Hymenoptera;Colletidae;Colletes;Colletes succinctus;Germany;GenBank;NA;EF028525  
Hymenoptera;Colletidae;Colletes;Colletes wolfi;Italy;GenBank;NA;EF028527  
Hymenoptera;Colletidae;Colletes;Colletes graeffei;Greece;GenBank;NA;EF218722  
Hymenoptera;Halictidae;Sphecodes;Sphecodes hyalinatus;Ireland;GenBank;NA;JQ909877  
Hymenoptera;Halictidae;Sphecodes;Sphecodes schenckii;Turkey;GenBank;NA;JX256660  
Hymenoptera;Halictidae;Sphecodes;Sphecodes croaticus;Czech Republic;GenBank;NA;JX256662  
Hymenoptera;Halictidae;Sphecodes;Sphecodes cristatus;Slovakia;GenBank;NA;JX256667  
Hymenoptera;Halictidae;Sphecodes;Sphecodes hyalinatus;Czech Republic;GenBank;NA;JX256691  
Hymenoptera;Halictidae;Sphecodes;Sphecodes hyalinatus;Bulgaria;GenBank;NA;JX256692  
Hymenoptera;Halictidae;Sphecodes;Sphecodes majalis;Czech Republic;GenBank;NA;JX256703  
Hymenoptera;Halictidae;Sphecodes;Sphecodes spinulosus;Czech Republic;GenBank;NA;JX256721  
Hymenoptera;Halictidae;Sphecodes;Sphecodes spinulosus;Hungary;GenBank;NA;JX256722  
Hymenoptera;Halictidae;Sphecodes;Sphecodes rubicundus;Czech Republic;GenBank;NA;JX256725  
Hymenoptera;Apidae;Bombus;Bombus monticola;Norway;GenBank;NA;KF434334  
Hymenoptera;Apidae;Bombus;Bombus monticola;Norway;GenBank;NA;KF434335  
Hymenoptera;Apidae;Bombus;Bombus monticola;Norway;GenBank;NA;KF434336  
Hymenoptera;Apidae;Bombus;Bombus monticola;Norway;GenBank;NA;KF434337  
Hymenoptera;Apidae;Bombus;Bombus monticola;Norway;GenBank;NA;KF434338  
Hymenoptera;Apidae;Bombus;Bombus monticola;Norway;GenBank;NA;KF434339  
Hymenoptera;Apidae;Bombus;Bombus monticola;Norway;GenBank;NA;KF434340  
Hymenoptera;Apidae;Bombus;Bombus monticola;Norway;GenBank;NA;KF434341  
Hymenoptera;Apidae;Lasioglossum;Lasioglossum sexnotatum;Germany;GenBank;NA;KX374788  
Hymenoptera;Halictidae;Lasioglossum;Lasioglossum brevicorne;Germany;GenBank;NA;KX374792  
Hymenoptera;Apidae;Bombus;Bombus konradini;Italy;GenBank;NA;KY317973  
Hymenoptera;Apidae;Bombus;Bombus monticola;Switzerland;Bold;GBAH17005-19;KY317975  
Hymenoptera;Apidae;Bombus;Bombus monticola;United Kingdom;Bold;GBAH17011-19;KY317976  
Hymenoptera;Apidae;Bombus;Bombus monticola;France;Bold;GBAH17007-19;KY317977  
Hymenoptera;Apidae;Bombus;Bombus monticola;Sweden;Bold;GBAH17003-19;KY317978  
Hymenoptera;Apidae;Bombus;Bombus monticola;Italy;Bold;GBAH17004-19;KY317979  
Hymenoptera;Apidae;Bombus;Bombus monticola;Greece;Bold;GBAH17006-19;KY317980  
Hymenoptera;Apidae;Bombus;Bombus mucidus;Switzerland;GenBank;NA;MG309777  
Hymenoptera;Apidae;Bombus;Bombus haematurus;Austria;GenBank;NA;MH319126  
Hymenoptera;Halictidae;Lasioglossum;Lasioglossum laevigatum;Austria;GenBank;NA;MH319135  
Hymenoptera;Andrenidae;Nomada;Nomada armata;Austria;GenBank;NA;MH319146  
Hymenoptera;Apidae;Andrena;Andrena ovata;Austria;GenBank;NA;MH319152  
Hymenoptera;Halictidae;Halictus;Halictus quadricinctus;Austria;GenBank;NA;MH319165  
Hymenoptera;Halictidae;Lasioglossum;Lasioglossum majus;Austria;GenBank;NA;MH319246  
Hymenoptera;Apidae;Bombus;Bombus alpinus;Switzerland;Bold;BBB0067-10;NA  
Hymenoptera;Apidae;Bombus;Bombus alpinus;Sweden;Bold;WASPS382-14;NA  
Hymenoptera;Halictidae;Sphecodes;Sphecodes rubicundus;United Kingdom;Bold;BOWGF169-08;NA  
Lepidoptera;Nymphalidae;Euphydryas;Euphydryas aurinia;France;GenBank;NA;AF153920  
Lepidoptera;Nymphalidae;Euphydryas;Euphydryas maturna;Finland;GenBank;NA;AF153933  
Lepidoptera;Hesperiidae;Carterocephalus;Carterocephalus palaemon;Russia;GenBank;NA;AY585892  
Lepidoptera;Hesperiidae;Carterocephalus;Carterocephalus palaemon;Belgium;GenBank;NA;AY585893  
Lepidoptera;Hesperiidae;Carterocephalus;Carterocephalus palaemon;Belgium;GenBank;NA;AY585894  
Lepidoptera;Pieridae;Pieris;Pieris rapae;Sweden;GenBank;NA;DQ148916  
Lepidoptera;Papilionidae;Parnassius;Parnassius apollo;Russia;GenBank;NA;EF514429  
Lepidoptera;Papilionidae;Papilio;Papilio hospiton;Italy;GenBank;NA;EF514438  
Lepidoptera;Papilionidae;Papilio;Papilio hospiton;Italy;GenBank;NA;EF514443  
Lepidoptera;Papilionidae;Parnassius;Parnassius apollo;Russia;GenBank;NA;EF514457  
Lepidoptera;Nymphalidae;Erebia;Erebia euryale;Slovakia;GenBank;NA;FJ628423  
Lepidoptera;Nymphalidae;Erebia;Erebia euryale;Slovakia;GenBank;NA;FJ628424  
Lepidoptera;Nymphalidae;Erebia;Erebia medusa;Slovakia;GenBank;NA;FJ628425  
Lepidoptera;Nymphalidae;Erebia;Erebia manto;Slovakia;GenBank;NA;FJ628427  
Lepidoptera;Nymphalidae;Erebia;Erebia euryale;Slovakia;GenBank;NA;FJ628428  
Lepidoptera;Nymphalidae;Erebia;Erebia manto;Slovakia;GenBank;NA;FJ628429  
Lepidoptera;Nymphalidae;Erebia;Erebia gorge;Slovakia;GenBank;NA;FJ628430  
Lepidoptera;Nymphalidae;Erebia;Erebia ligea;Slovakia;GenBank;NA;FJ628431  
Lepidoptera;Nymphalidae;Erebia;Erebia epiphron;Slovakia;GenBank;NA;FJ628432  
Lepidoptera;Nymphalidae;Erebia;Erebia epiphron;Slovakia;GenBank;NA;FJ628433  
Lepidoptera;Nymphalidae;Erebia;Erebia aethiops;Slovakia;GenBank;NA;FJ628434  
Lepidoptera;Nymphalidae;Erebia;Erebia pronoe;Slovakia;GenBank;NA;FJ628435  
Lepidoptera;Nymphalidae;Erebia;Erebia euryale;Slovakia;GenBank;NA;FJ628437  
Lepidoptera;Nymphalidae;Erebia;Erebia euryale;Slovakia;GenBank;NA;FJ628438  
Lepidoptera;Nymphalidae;Erebia;Erebia pronoe;Slovakia;GenBank;NA;FJ628439  
Lepidoptera;Nymphalidae;Erebia;Erebia euryale;Slovakia;GenBank;NA;FJ628440  
Lepidoptera;Nymphalidae;Erebia;Erebia euryale;Slovakia;GenBank;NA;FJ628441  
Lepidoptera;Nymphalidae;Erebia;Erebia euryale;Slovakia;GenBank;NA;FJ628442  
Lepidoptera;Nymphalidae;Erebia;Erebia euryale;Slovakia;GenBank;NA;FJ628443

Lepidoptera;Nymphalidae;Erebia;Erebia medusa;Slovakia;GenBank;NA;FJ628444  
 Lepidoptera;Nymphalidae;Erebia;Erebia pharte;Slovakia;GenBank;NA;FJ628447  
 Lepidoptera;Pieridae;Euchloe;Euchloe crameri;Spain;Bold;GBGL6385-09;FM196449  
 Lepidoptera;Pieridae;Euchloe;Euchloe ausonia;Russia;Bold;GBGL6380-09;FM196454  
 Lepidoptera;Pieridae;Euchloe;Euchloe simplonia;France;Bold;GBGL6377-09;FM196457  
 Lepidoptera;Pieridae;Euchloe;Euchloe insularis;Italy;Bold;GBGL6374-09;FM196460  
 Lepidoptera;Pieridae;Euchloe;Euchloe ausonia;Italy;Bold;GBGL6357-09;FM196477  
 Lepidoptera;Pieridae;Euchloe;Euchloe ausonia taurica;Cyprus;GenBank;NA;FM196478  
 Lepidoptera;Pieridae;Euchloe;Euchloe simplonia;Switzerland;Bold;GBGL6353-09;FM196481  
 Lepidoptera;Pieridae;Euchloe;Euchloe crameri;Italy;Bold;GBGL6352-09;FM196482  
 Lepidoptera;Pieridae;Euchloe;Euchloe insularis;France;Bold;GBGL6351-09;FM196483  
 Lepidoptera;Pieridae;Euchloe;Euchloe simplonia;Italy;Bold;GBGL6337-09;FM196497  
 Lepidoptera;Pieridae;Euchloe;Euchloe simplonia;Italy;Bold;GBGL6336-09;FM196498  
 Lepidoptera;Pieridae;Euchloe;Euchloe crameri;Italy;Bold;GBGL6335-09;FM196499  
 Lepidoptera;Pieridae;Euchloe;Euchloe ausonia;Italy;Bold;GBGL6332-09;FM196502  
 Lepidoptera;Pieridae;Euchloe;Euchloe tagis bellezina;France;GenBank;NA;FM196520  
 Lepidoptera;Pieridae;Euchloe;Euchloe ausonia;Russia;Bold;GBGL6310-09;FM196524  
 Lepidoptera;Nymphalidae;Melanargia;Melanargia arge;Italy;GenBank;NA;GQ200901  
 Lepidoptera;Nymphalidae;Melanargia;Melanargia arge;Italy;GenBank;NA;GQ200902  
 Lepidoptera;Nymphalidae;Melanargia;Melanargia arge;Italy;GenBank;NA;GQ200903  
 Lepidoptera;Nymphalidae;Melanargia;Melanargia arge;Italy;GenBank;NA;GQ200904  
 Lepidoptera;Nymphalidae;Melanargia;Melanargia galathea;Germany;GenBank;NA;GQ200925  
 Lepidoptera;Nymphalidae;Melanargia;Melanargia galathea;Macedonia;GenBank;NA;GQ200926  
 Lepidoptera;Nymphalidae;Melanargia;Melanargia galathea;Greece;GenBank;NA;GQ200927  
 Lepidoptera;Nymphalidae;Melanargia;Melanargia galathea;Turkey;GenBank;NA;GQ200928  
 Lepidoptera;Nymphalidae;Melanargia;Melanargia galathea;Turkey;GenBank;NA;GQ200929  
 Lepidoptera;Nymphalidae;Melanargia;Melanargia galathea;Greece;GenBank;NA;GQ200931  
 Lepidoptera;Nymphalidae;Melanargia;Melanargia galathea;Greece;GenBank;NA;GQ200932  
 Lepidoptera;Nymphalidae;Melanargia;Melanargia galathea;Greece;GenBank;NA;GQ200933  
 Lepidoptera;Nymphalidae;Melanargia;Melanargia galathea;Macedonia;GenBank;NA;GQ200934  
 Lepidoptera;Nymphalidae;Melanargia;Melanargia galathea;Macedonia;GenBank;NA;GQ200935  
 Lepidoptera;Nymphalidae;Melanargia;Melanargia galathea;Macedonia;GenBank;NA;GQ200937  
 Lepidoptera;Nymphalidae;Melanargia;Melanargia galathea;Macedonia;GenBank;NA;GQ200938  
 Lepidoptera;Nymphalidae;Melanargia;Melanargia galathea;Greece;GenBank;NA;GQ200939  
 Lepidoptera;Nymphalidae;Melanargia;Melanargia galathea;Greece;GenBank;NA;GQ200940  
 Lepidoptera;Nymphalidae;Melanargia;Melanargia galathea;Russia;GenBank;NA;GQ200942  
 Lepidoptera;Nymphalidae;Melanargia;Melanargia galathea;Russia;GenBank;NA;GQ200943  
 Lepidoptera;Nymphalidae;Melanargia;Melanargia galathea;Italy;GenBank;NA;GQ200944  
 Lepidoptera;Nymphalidae;Melanargia;Melanargia galathea;Italy;GenBank;NA;GQ200945  
 Lepidoptera;Nymphalidae;Melanargia;Melanargia occitanica;France;GenBank;NA;GQ201102  
 Lepidoptera;Nymphalidae;Melanargia;Melanargia occitanica;France;GenBank;NA;GQ201103  
 Lepidoptera;Nymphalidae;Melanargia;Melanargia occitanica;France;GenBank;NA;GQ201106  
 Lepidoptera;Nymphalidae;Melanargia;Melanargia occitanica;France;GenBank;NA;GQ201107  
 Lepidoptera;Nymphalidae;Melanargia;Melanargia occitanica;Italy;GenBank;NA;GQ201115  
 Lepidoptera;Nymphalidae;Melanargia;Melanargia occitanica;Italy;GenBank;NA;GQ201116  
 Lepidoptera;Nymphalidae;Melanargia;Melanargia occitanica;Spain;GenBank;NA;GQ201117  
 Lepidoptera;Nymphalidae;Melanargia;Melanargia occitanica;Spain;GenBank;NA;GQ201118  
 Lepidoptera;Nymphalidae;Melanargia;Melanargia occitanica;Italy;GenBank;NA;GQ201119  
 Lepidoptera;Nymphalidae;Melanargia;Melanargia russiae;France;GenBank;NA;GQ201132  
 Lepidoptera;Nymphalidae;Melanargia;Melanargia russiae;Italy;GenBank;NA;GQ201133  
 Lepidoptera;Nymphalidae;Melanargia;Melanargia russiae;France;GenBank;NA;GQ201141  
 Lepidoptera;Nymphalidae;Melanargia;Melanargia russiae;Turkey;GenBank;NA;GQ201146  
 Lepidoptera;Nymphalidae;Melanargia;Melanargia russiae;Italy;GenBank;NA;GQ201147  
 Lepidoptera;Nymphalidae;Melanargia;Melanargia russiae;Italy;GenBank;NA;GQ201148  
 Lepidoptera;Nymphalidae;Melanargia;Melanargia russiae;Russia;GenBank;NA;GQ201157  
 Lepidoptera;Nymphalidae;Melanargia;Melanargia russiae;Russia;GenBank;NA;GQ201158  
 Lepidoptera;Nymphalidae;Melanargia;Melanargia russiae;Russia;GenBank;NA;GQ201159  
 Lepidoptera;Papilionidae;Papilio;Papilio machaon;Spain;GenBank;NA;GU675943  
 Lepidoptera;Hesperiidae;Pyrgus;Pyrgus armoricanus;Bulgaria;GenBank;NA;GU676051  
 Lepidoptera;Hesperiidae;Pyrgus;Pyrgus alveus;Germany;GenBank;NA;GU687041  
 Lepidoptera;Lycaenidae;Cyranis;Cyranis semiargus;Austria;GenBank;NA;HM393232  
 Lepidoptera;Lycaenidae;Agriades;Agriades glandon;Spain;GenBank;NA;HM401000  
 Lepidoptera;Lycaenidae;Agriades;Agriades glandon;Spain;GenBank;NA;HM401001  
 Lepidoptera;Lycaenidae;Agriades;Agriades glandon;Andorra;GenBank;NA;HM401002  
 Lepidoptera;Lycaenidae;Aricia;Aricia nicias;Spain;GenBank;NA;HM401003  
 Lepidoptera;Lycaenidae;Aricia;Aricia nicias;Spain;GenBank;NA;HM401004  
 Lepidoptera;Lycaenidae;Aricia;Aricia nicias;Spain;GenBank;NA;HM401005  
 Lepidoptera;Lycaenidae;Aricia;Aricia nicias;Spain;GenBank;NA;HM401006  
 Lepidoptera;Lycaenidae;Aricia;Aricia nicias;Spain;GenBank;NA;HM401007  
 Lepidoptera;Lycaenidae;Aricia;Aricia nicias;Spain;GenBank;NA;HM401008  
 Lepidoptera;Lycaenidae;Satyrium;Satyrium w-album;Finland;GenBank;NA;HM872811  
 Lepidoptera;Papilionidae;Parnassius;Parnassius mnemosyne;Estonia;GenBank;NA;HM872929  
 Lepidoptera;Lycaenidae;Lycaena;Lycaena tityrus;Estonia;GenBank;NA;HM872932  
 Lepidoptera;Hesperiidae;Pyrgus;Pyrgus serratulae;Estonia;GenBank;NA;HM872933  
 Lepidoptera;Nymphalidae;Boloria;Boloria dia;Estonia;GenBank;NA;HM872934  
 Lepidoptera;Pieridae;Leptidea;Leptidea juvernica;Estonia;GenBank;NA;HM872935  
 Lepidoptera;Nymphalidae;Euphydryas;Euphydryas aurinia;Estonia;GenBank;NA;HM872936  
 Lepidoptera;Nymphalidae;Nymphalis;Nymphalis polychloros;Estonia;GenBank;NA;HM873021

Lepidoptera;Nymphalidae;Hipparchia;Hipparchia statilinus;Spain;GenBank;NA;HM901231  
 Lepidoptera;Nymphalidae;Melanargia;Melanargia russiae;Portugal;GenBank;NA;HM901237  
 Lepidoptera;Nymphalidae;Coenonympha;Coenonympha dorus;Portugal;GenBank;NA;HM901238  
 Lepidoptera;Nymphalidae;Erebia;Erebia pronoe;Spain;GenBank;NA;HM901244  
 Lepidoptera;Nymphalidae;Erebia;Erebia pronoe;Spain;GenBank;NA;HM901254  
 Lepidoptera;Nymphalidae;Erebia;Erebia pronoe;Spain;GenBank;NA;HM901258  
 Lepidoptera;Nymphalidae;Erebia;Erebia pronoe;Spain;GenBank;NA;HM901260  
 Lepidoptera;Nymphalidae;Erebia;Erebia pronoe;Spain;GenBank;NA;HM901267  
 Lepidoptera;Hesperiidae;Pyrgus;Pyrgus onopordi;Spain;GenBank;NA;HM901359  
 Lepidoptera;Hesperiidae;Pyrgus;Pyrgus armoricanus;Spain;GenBank;NA;HM901360  
 Lepidoptera;Nymphalidae;Pyrgus;Pyrgus armoricanus;Spain;GenBank;NA;HM901361  
 Lepidoptera;Nymphalidae;Melitaea;Melitaea diamina;Spain;GenBank;NA;HM901373  
 Lepidoptera;Nymphalidae;Melitaea;Melitaea diamina;Spain;GenBank;NA;HM901374  
 Lepidoptera;Riodinidae;Hamearis;Hamearis lucina;Spain;GenBank;NA;HM901376  
 Lepidoptera;Nymphalidae;Limenitis;Limenitis reducta;Spain;GenBank;NA;HM901393  
 Lepidoptera;Nymphalidae;Limenitis;Limenitis reducta;Spain;GenBank;NA;HM901394  
 Lepidoptera;Nymphalidae;Erebia;Erebia euryale;Spain;GenBank;NA;HM901449  
 Lepidoptera;Nymphalidae;Erebia;Erebia euryale;Spain;GenBank;NA;HM901450  
 Lepidoptera;Nymphalidae;Melitaea;Melitaea cinxia;Spain;GenBank;NA;HM901487  
 Lepidoptera;Lycaenidae;Lycaena;Lycaena hippothoe;Spain;GenBank;NA;HM901488  
 Lepidoptera;Lycaenidae;Lycaena;Lycaena hippothoe;Spain;GenBank;NA;HM901489  
 Lepidoptera;Lycaenidae;Satyrium;Satyrium acaciae;Spain;GenBank;NA;HM901490  
 Lepidoptera;Nymphalidae;Erebia;Erebia euryale;Spain;GenBank;NA;HM901497  
 Lepidoptera;Nymphalidae;Erebia;Erebia epiphron;Spain;GenBank;NA;HM901499  
 Lepidoptera;Nymphalidae;Hipparchia;Hipparchia statilinus;Spain;GenBank;NA;HM901500  
 Lepidoptera;Nymphalidae;Hipparchia;Hipparchia statilinus;Spain;GenBank;NA;HM901501  
 Lepidoptera;Nymphalidae;Chazara;Chazara briseis;Spain;GenBank;NA;HM901502  
 Lepidoptera;Nymphalidae;Erebia;Erebia neoridas;Spain;GenBank;NA;HM901503  
 Lepidoptera;Nymphalidae;Erebia;Erebia neoridas;Spain;GenBank;NA;HM901504  
 Lepidoptera;Nymphalidae;Erebia;Erebia oeme;Spain;GenBank;NA;HM901505  
 Lepidoptera;Nymphalidae;Araschnia;Araschnia levana;Spain;GenBank;NA;HM901511  
 Lepidoptera;Nymphalidae;Arethusana;Arethusana arethusa;Spain;GenBank;NA;HM901530  
 Lepidoptera;Nymphalidae;Arethusana;Arethusana arethusa;Spain;GenBank;NA;HM901531  
 Lepidoptera;Lycaenidae;Cupido;Cupido minimus;Spain;GenBank;NA;HM901532  
 Lepidoptera;Lycaenidae;Cupido;Cupido osiris;Spain;GenBank;NA;HM901533  
 Lepidoptera;Lycaenidae;Cupido;Cupido osiris;Spain;GenBank;NA;HM901534  
 Lepidoptera;Lycaenidae;Cupido;Cupido osiris;Spain;GenBank;NA;HM901535  
 Lepidoptera;Lycaenidae;Cupido;Cupido osiris;Spain;GenBank;NA;HM901536  
 Lepidoptera;Nymphalidae;Melitaea;Melitaea nevadensis;Spain;GenBank;NA;HM901538  
 Lepidoptera;Nymphalidae;Melitaea;Melitaea nevadensis;Spain;GenBank;NA;HM901539  
 Lepidoptera;Nymphalidae;Melitaea;Melitaea nevadensis;Spain;GenBank;NA;HM901540  
 Lepidoptera;Nymphalidae;Arethusana;Arethusana arethusa;Spain;GenBank;NA;HM901543  
 Lepidoptera;Nymphalidae;Arethusana;Arethusana arethusa;Spain;GenBank;NA;HM901544  
 Lepidoptera;Nymphalidae;Limenitis;Limenitis camilla;Spain;GenBank;NA;HM901620  
 Lepidoptera;Nymphalidae;Erebia;Erebia gorge;Spain;GenBank;NA;HM901656  
 Lepidoptera;Nymphalidae;Erebia;Erebia gorge;Spain;GenBank;NA;HM901657  
 Lepidoptera;Nymphalidae;Erebia;Erebia gorge;Spain;GenBank;NA;HM901658  
 Lepidoptera;Nymphalidae;Erebia;Erebia gorge;Spain;GenBank;NA;HM901659  
 Lepidoptera;Nymphalidae;Erebia;Erebia pronoe;Spain;GenBank;NA;HM901710  
 Lepidoptera;Nymphalidae;Erebia;Erebia pronoe;Spain;GenBank;NA;HM901711  
 Lepidoptera;Nymphalidae;Apatura;Apatura ilia;Spain;GenBank;NA;HM901712  
 Lepidoptera;Nymphalidae;Apatura;Apatura iris;Spain;GenBank;NA;HM901713  
 Lepidoptera;Nymphalidae;Apatura;Apatura ilia;Spain;GenBank;NA;HM901714  
 Lepidoptera;Pieridae;Colias;Colias phicomone;Spain;GenBank;NA;HM901717  
 Lepidoptera;Pieridae;Colias;Colias phicomone;Spain;GenBank;NA;HM901718  
 Lepidoptera;Nymphalidae;Boloria;Boloria euphrosyne;Spain;GenBank;NA;HM901719  
 Lepidoptera;Nymphalidae;Boloria;Boloria euphrosyne;Spain;GenBank;NA;HM901720  
 Lepidoptera;Pieridae;Euchloe;Euchloe simplonia;Spain;GenBank;NA;HM901723  
 Lepidoptera;Nymphalidae;Brenthis;Brenthis ino;Spain;GenBank;NA;HM901756  
 Lepidoptera;Papilionidae;Parnassius;Parnassius mnemosyne;Spain;GenBank;NA;HM901765  
 Lepidoptera;Nymphalidae;Coenonympha;Coenonympha glycerion;Spain;GenBank;NA;HM901767  
 Lepidoptera;Nymphalidae;Brenthis;Brenthis ino;Spain;GenBank;NA;HM901768  
 Lepidoptera;Nymphalidae;Coenonympha;Coenonympha glycerion;Spain;GenBank;NA;HM901769  
 Lepidoptera;Hesperiidae;Thymelicus;Thymelicus sylvestris;Spain;GenBank;NA;HM901771  
 Lepidoptera;Nymphalidae;Erebia;Erebia gorge;Spain;GenBank;NA;HM901774  
 Lepidoptera;Nymphalidae;Boloria;Boloria pales;Spain;GenBank;NA;HM901775  
 Lepidoptera;Nymphalidae;Arethusana;Arethusana arethusa;Spain;GenBank;NA;HM901779  
 Lepidoptera;Nymphalidae;Boloria;Boloria euphrosyne;Spain;GenBank;NA;HM901781  
 Lepidoptera;Nymphalidae;Boloria;Boloria pales;Italy;GenBank;NA;HM901782  
 Lepidoptera;Nymphalidae;Erebia;Erebia pronoe;Spain;GenBank;NA;HM901783  
 Lepidoptera;Nymphalidae;Erebia;Erebia pronoe;Spain;GenBank;NA;HM901784  
 Lepidoptera;Nymphalidae;Erebia;Erebia pronoe;Spain;GenBank;NA;HM901785  
 Lepidoptera;Nymphalidae;Erebia;Erebia pronoe;Spain;GenBank;NA;HM901786  
 Lepidoptera;Nymphalidae;Erebia;Erebia pronoe;Spain;GenBank;NA;HM901787  
 Lepidoptera;Hesperiidae;Muschampia;Muschampia proto;Spain;GenBank;NA;HM901823  
 Lepidoptera;Nymphalidae;Melitaea;Melitaea cinxia;Italy;GenBank;NA;HM910512  
 Lepidoptera;Lycaenidae;Cupido;Cupido minimus;Italy;GenBank;NA;HM913961  
 Lepidoptera;Lycaenidae;Glaucopsyche;Glaucopsyche alexis;Italy;GenBank;NA;HM913963

[illegible]

[illegible]

Lepidoptera; Pieridae; Leptidea; Leptidea sinapis; Romania; GenBank; NA; JF513031  
 Lepidoptera; Pieridae; Leptidea; Leptidea sinapis; Italy; GenBank; NA; JF513033  
 Lepidoptera; Pieridae; Leptidea; Leptidea sinapis; France; GenBank; NA; JF513034  
 Lepidoptera; Pieridae; Leptidea; Leptidea sinapis; Romania; GenBank; NA; JF513036  
 Lepidoptera; Pieridae; Leptidea; Leptidea sinapis; Romania; GenBank; NA; JF513037  
 Lepidoptera; Pieridae; Leptidea; Leptidea sinapis; Italy; GenBank; NA; JF513038  
 Lepidoptera; Pieridae; Leptidea; Leptidea sinapis; Romania; GenBank; NA; JF513039  
 Lepidoptera; Pieridae; Leptidea; Leptidea sinapis; Spain; GenBank; NA; JF513040  
 Lepidoptera; Pieridae; Leptidea; Leptidea sinapis; Spain; GenBank; NA; JF513041  
 Lepidoptera; Pieridae; Leptidea; Leptidea sinapis; Spain; GenBank; NA; JF513042  
 Lepidoptera; Pieridae; Leptidea; Leptidea sinapis; Spain; GenBank; NA; JF513043  
 Lepidoptera; Pieridae; Leptidea; Leptidea sinapis; Spain; GenBank; NA; JF513044  
 Lepidoptera; Pieridae; Leptidea; Leptidea sinapis; Spain; GenBank; NA; JF513045  
 Lepidoptera; Lycaenidae; Satyrium; Satyrium pruni; Finland; GenBank; NA; JF853830  
 Lepidoptera; Lycaenidae; Lycaena; Lycaena dispar; Russia; GenBank; NA; JF854415  
 Lepidoptera; Lycaenidae; Lycaena; Lycaena dispar; Russia; GenBank; NA; JF854416  
 Lepidoptera; Lycaenidae; Scolitantides; Scolitantides orion; Russia; GenBank; NA; JF854417  
 Lepidoptera; Nymphalidae; Erebia; Erebia euryale; Russia; GenBank; NA; JF854419  
 Lepidoptera; Nymphalidae; Erebia; Erebia euryale; Russia; GenBank; NA; JF854420  
 Lepidoptera; Hesperidae; Heteropterus; Heteropterus morpheus; Russia; GenBank; NA; JF854423  
 Lepidoptera; Hesperidae; Heteropterus; Heteropterus morpheus; Russia; GenBank; NA; JF854424  
 Lepidoptera; Nymphalidae; Lasiommata; Lasiommata megera; Greece; GenBank; NA; JF854491  
 Lepidoptera; Nymphalidae; Lasiommata; Lasiommata megera; Hungary; GenBank; NA; JF854492  
 Lepidoptera; Papilionidae; Iphiclides; Iphiclides podalirius; Russia; GenBank; NA; JF854496  
 Lepidoptera; Nymphalidae; Boloria; Boloria titania; Switzerland; GenBank; NA; JF860243  
 Lepidoptera; Lycaenidae; Phengaris; Phengaris alcon alcon; Poland; GenBank; NA; JN160200  
 Lepidoptera; Lycaenidae; Phengaris; Phengaris alcon rebeli; Poland; GenBank; NA; JN160201  
 Lepidoptera; Lycaenidae; Phengaris; Phengaris alcon rebeli; Lithuania; GenBank; NA; JN160202  
 Lepidoptera; Nymphalidae; Charaxes; Charaxes jasius; Spain; GenBank; NA; JN264880  
 Lepidoptera; Nymphalidae; Melitaea; Melitaea cinxia; Spain; GenBank; NA; JN274546  
 Lepidoptera; Nymphalidae; Melitaea; Melitaea diamina; Finland; GenBank; NA; JN274637  
 Lepidoptera; Nymphalidae; Melitaea; Melitaea diamina; Finland; GenBank; NA; JN274638  
 Lepidoptera; Lycaenidae; Cupido; Cupido osiris; Spain; GenBank; NA; JN276892  
 Lepidoptera; Nymphalidae; Minois; Minois dryas; Germany; GenBank; NA; JN278909  
 Lepidoptera; Lycaenidae; Plebejus; Plebejus argus; Poland; GenBank; NA; JN581045  
 Lepidoptera; Lycaenidae; Plebejus; Plebejus argus; Poland; GenBank; NA; JN581046  
 Lepidoptera; Lycaenidae; Plebejus; Plebejus argus; Poland; GenBank; NA; JN581047  
 Lepidoptera; Lycaenidae; Plebejus; Plebejus argus; Poland; GenBank; NA; JN581048  
 Lepidoptera; Lycaenidae; Plebejus; Plebejus argus; Poland; GenBank; NA; JN581049  
 Lepidoptera; Lycaenidae; Plebejus; Plebejus argus; Poland; GenBank; NA; JN581050  
 Lepidoptera; Lycaenidae; Plebejus; Plebejus argus; Poland; GenBank; NA; JN581051  
 Lepidoptera; Lycaenidae; Plebejus; Plebejus argus; Poland; GenBank; NA; JN581052  
 Lepidoptera; Lycaenidae; Plebejus; Plebejus argus; Poland; GenBank; NA; JN581053  
 Lepidoptera; Lycaenidae; Plebejus; Plebejus argus; Poland; GenBank; NA; JN581054  
 Lepidoptera; Lycaenidae; Plebejus; Plebejus argus; Poland; GenBank; NA; JN581055  
 Lepidoptera; Lycaenidae; Plebejus; Plebejus argus; Poland; GenBank; NA; JN581056  
 Lepidoptera; Lycaenidae; Plebejus; Plebejus argus; Poland; GenBank; NA; JN581057  
 Lepidoptera; Lycaenidae; Plebejus; Plebejus argus; Poland; GenBank; NA; JN581058  
 Lepidoptera; Lycaenidae; Plebejus; Plebejus argus; Poland; GenBank; NA; JN581059  
 Lepidoptera; Lycaenidae; Plebejus; Plebejus argus; Poland; GenBank; NA; JN581060  
 Lepidoptera; Lycaenidae; Aricia; Aricia artaxerxes; Russia; Bold; GBMIN16198-13; JX678097  
 Lepidoptera; Lycaenidae; Aricia; Aricia artaxerxes; Russia; Bold; GBMIN16336-13; JX678098  
 Lepidoptera; Lycaenidae; Lycaena; Lycaena helle; Germany; Bold; GBGLL181-13; KC208818  
 Lepidoptera; Lycaenidae; Lycaena; Lycaena helle; Germany; Bold; GBGLL180-13; KC208819  
 Lepidoptera; Lycaenidae; Lycaena; Lycaena helle; Germany; Bold; GBGLL179-13; KC208820  
 Lepidoptera; Lycaenidae; Lycaena; Lycaena helle; Germany; Bold; GBGLL178-13; KC208821  
 Lepidoptera; Lycaenidae; Lycaena; Lycaena helle; France; Bold; GBGLL177-13; KC208822  
 Lepidoptera; Lycaenidae; Lycaena; Lycaena helle; France; Bold; GBGLL176-13; KC208823  
 Lepidoptera; Lycaenidae; Lycaena; Lycaena helle; France; Bold; GBGLL175-13; KC208824  
 Lepidoptera; Lycaenidae; Lycaena; Lycaena helle; France; Bold; GBGLL174-13; KC208825  
 Lepidoptera; Lycaenidae; Lycaena; Lycaena helle; Germany; Bold; GBGLL173-13; KC208826  
 Lepidoptera; Lycaenidae; Lycaena; Lycaena helle; Germany; Bold; GBGLL172-13; KC208827  
 Lepidoptera; Lycaenidae; Lycaena; Lycaena helle; Germany; Bold; GBGLL171-13; KC208828  
 Lepidoptera; Lycaenidae; Lycaena; Lycaena helle; Germany; Bold; GBGLL170-13; KC208829  
 Lepidoptera; Lycaenidae; Lycaena; Lycaena helle; Germany; Bold; GBGLL169-13; KC208830  
 Lepidoptera; Lycaenidae; Lycaena; Lycaena helle; Poland; Bold; GBGLL168-13; KC208831  
 Lepidoptera; Lycaenidae; Lycaena; Lycaena helle; Poland; Bold; GBGLL167-13; KC208832  
 Lepidoptera; Lycaenidae; Lycaena; Lycaena helle; Poland; Bold; GBGLL166-13; KC208833  
 Lepidoptera; Lycaenidae; Lycaena; Lycaena helle; Poland; Bold; GBGLL165-13; KC208834  
 Lepidoptera; Lycaenidae; Lycaena; Lycaena helle; Germany; Bold; GBGLL164-13; KC208835  
 Lepidoptera; Lycaenidae; Lycaena; Lycaena helle; Germany; Bold; GBGLL163-13; KC208836  
 Lepidoptera; Lycaenidae; Lycaena; Lycaena helle; Germany; Bold; GBGLL162-13; KC208837  
 Lepidoptera; Lycaenidae; Lycaena; Lycaena helle; France; Bold; GBGLL161-13; KC208838  
 Lepidoptera; Lycaenidae; Lycaena; Lycaena helle; France; Bold; GBGLL160-13; KC208839  
 Lepidoptera; Lycaenidae; Lycaena; Lycaena helle; France; Bold; GBGLL159-13; KC208840  
 Lepidoptera; Lycaenidae; Lycaena; Lycaena helle; France; Bold; GBGLL158-13; KC208841  
 Lepidoptera; Lycaenidae; Lycaena; Lycaena helle; Sweden; Bold; GBGLL157-13; KC208842  
 Lepidoptera; Lycaenidae; Lycaena; Lycaena helle; Sweden; Bold; GBGLL156-13; KC208843



Lepidoptera;Lycaenidae;Lycaena;Lycaena helle;Sweden;Bold;GBGLL155-13;KC208844  
Lepidoptera;Lycaenidae;Lycaena;Lycaena helle;Sweden;Bold;GBGLL154-13;KC208845  
Lepidoptera;Lycaenidae;Lycaena;Lycaena helle;Sweden;Bold;GBGLL153-13;KC208846  
Lepidoptera;Lycaenidae;Lycaena;Lycaena helle;Poland;Bold;GBGLL152-13;KC208847  
Lepidoptera;Lycaenidae;Lycaena;Lycaena helle;Poland;Bold;GBGLL151-13;KC208848  
Lepidoptera;Lycaenidae;Lycaena;Lycaena helle;Poland;Bold;GBGLL150-13;KC208849  
Lepidoptera;Nymphalidae;Melitaea;Melitaea cinxia;Finland;GenBank;NA;KC465909  
Lepidoptera;Nymphalidae;Melitaea;Melitaea cinxia;Sweden;GenBank;NA;KC465910  
Lepidoptera;Nymphalidae;Melitaea;Melitaea cinxia;Estonia;GenBank;NA;KC465911  
Lepidoptera;Nymphalidae;Melitaea;Melitaea cinxia;Sweden;GenBank;NA;KC465912  
Lepidoptera;Nymphalidae;Melitaea;Melitaea cinxia;Finland;GenBank;NA;KC465913  
Lepidoptera;Nymphalidae;Melitaea;Melitaea cinxia;Estonia;GenBank;NA;KC465914  
Lepidoptera;Nymphalidae;Melitaea;Melitaea cinxia;Sweden;GenBank;NA;KC465915  
Lepidoptera;Nymphalidae;Melitaea;Melitaea cinxia;Finland;GenBank;NA;KC465916  
Lepidoptera;Nymphalidae;Melitaea;Melitaea cinxia;Sweden;GenBank;NA;KC465917  
Lepidoptera;Pieridae;Leptidea;Leptidea juvernica;Germany;Bold;GBGLP260-13;KC865973  
Lepidoptera;Pieridae;Leptidea;Leptidea sinapis;Luxembourg;Bold;GBGLP211-13;KC866022  
Lepidoptera;Pieridae;Leptidea;Leptidea sinapis;Croatia;Bold;GBGLP208-13;KC866025  
Lepidoptera;Pieridae;Leptidea;Leptidea sinapis;Croatia;Bold;GBGLP207-13;KC866026  
Lepidoptera;Pieridae;Leptidea;Leptidea sinapis;Finland;Bold;GBGLP105-13;KC866128  
Lepidoptera;Pieridae;Leptidea;Leptidea juvernica;Germany;Bold;GBGLP103-13;KC866130  
Lepidoptera;Nymphalidae;Vanessa;Vanessa atalanta;Poland;GenBank;NA;KJ649004  
Lepidoptera;Nymphalidae;Erebia;Erebia euryale;Slovakia;GenBank;NA;KM196507  
Lepidoptera;Nymphalidae;Euphydryas;Euphydryas aurinia;Finland;GenBank;NA;KM572689  
Lepidoptera;Nymphalidae;Maniola;Maniola jurtina;France;GenBank;NA;KP032275  
Lepidoptera;Nymphalidae;Maniola;Maniola jurtina;France;GenBank;NA;KP032276  
Lepidoptera;Nymphalidae;Maniola;Maniola jurtina;France;GenBank;NA;KP032277  
Lepidoptera;Nymphalidae;Maniola;Maniola jurtina;France;GenBank;NA;KP032278  
Lepidoptera;Nymphalidae;Maniola;Maniola jurtina;France;GenBank;NA;KP032279  
Lepidoptera;Nymphalidae;Maniola;Maniola jurtina;Albania;GenBank;NA;KP032289  
Lepidoptera;Nymphalidae;Maniola;Maniola jurtina;Austria;GenBank;NA;KP032295  
Lepidoptera;Nymphalidae;Maniola;Maniola jurtina;Portugal;GenBank;NA;KP032297  
Lepidoptera;Nymphalidae;Maniola;Maniola jurtina;Spain;GenBank;NA;KP032317  
Lepidoptera;Nymphalidae;Maniola;Maniola jurtina;France;GenBank;NA;KP032318  
Lepidoptera;Nymphalidae;Pyronia;Pyronia cecilia;Italy;Bold;GBLN5432-15;KP032346  
Lepidoptera;Nymphalidae;Pyronia;Pyronia cecilia;Italy;Bold;GBLN5431-15;KP032347  
Lepidoptera;Nymphalidae;Maniola;Maniola jurtina;Spain;GenBank;NA;KP032364  
Lepidoptera;Lycaenidae;Lysandra;Lysandra coridon;Germany;GenBank;NA;KR007013  
Lepidoptera;Lycaenidae;Lysandra;Lysandra coridon;Germany;GenBank;NA;KR007014  
Lepidoptera;Lycaenidae;Lysandra;Lysandra coridon;Germany;GenBank;NA;KR007015  
Lepidoptera;Lycaenidae;Lysandra;Lysandra coridon;Germany;GenBank;NA;KR007016  
Lepidoptera;Lycaenidae;Lysandra;Lysandra coridon;Germany;GenBank;NA;KR007017  
Lepidoptera;Lycaenidae;Lysandra;Lysandra coridon;Germany;GenBank;NA;KR007018  
Lepidoptera;Lycaenidae;Lysandra;Lysandra coridon;Germany;GenBank;NA;KR007019  
Lepidoptera;Lycaenidae;Lysandra;Lysandra coridon;Germany;GenBank;NA;KR007020  
Lepidoptera;Lycaenidae;Lysandra;Lysandra coridon;Germany;GenBank;NA;KR007021  
Lepidoptera;Lycaenidae;Lysandra;Lysandra coridon;Germany;GenBank;NA;KR007022  
Lepidoptera;Lycaenidae;Lysandra;Lysandra coridon;Germany;GenBank;NA;KR007023  
Lepidoptera;Lycaenidae;Lysandra;Lysandra coridon;Germany;GenBank;NA;KR007024  
Lepidoptera;Lycaenidae;Lysandra;Lysandra coridon;Germany;GenBank;NA;KR007025  
Lepidoptera;Lycaenidae;Lysandra;Lysandra coridon;Germany;GenBank;NA;KR007026  
Lepidoptera;Lycaenidae;Lysandra;Lysandra coridon;Germany;GenBank;NA;KR007027  
Lepidoptera;Lycaenidae;Lysandra;Lysandra coridon;Germany;GenBank;NA;KR007038  
Lepidoptera;Lycaenidae;Lysandra;Lysandra coridon;Germany;GenBank;NA;KR007039  
Lepidoptera;Lycaenidae;Lysandra;Lysandra coridon;Germany;GenBank;NA;KR007040  
Lepidoptera;Lycaenidae;Lysandra;Lysandra coridon;Germany;GenBank;NA;KR007041  
Lepidoptera;Lycaenidae;Lysandra;Lysandra coridon;France;GenBank;NA;KR007056  
Lepidoptera;Lycaenidae;Lysandra;Lysandra coridon;France;GenBank;NA;KR007057  
Lepidoptera;Lycaenidae;Lysandra;Lysandra coridon;France;GenBank;NA;KR007058  
Lepidoptera;Lycaenidae;Lysandra;Lysandra coridon;France;GenBank;NA;KR007059  
Lepidoptera;Lycaenidae;Lysandra;Lysandra coridon;France;GenBank;NA;KR007060  
Lepidoptera;Lycaenidae;Lysandra;Lysandra coridon;France;GenBank;NA;KR007066  
Lepidoptera;Lycaenidae;Lysandra;Lysandra coridon;France;GenBank;NA;KR007067  
Lepidoptera;Lycaenidae;Lysandra;Lysandra coridon;France;GenBank;NA;KR007068  
Lepidoptera;Lycaenidae;Lysandra;Lysandra coridon;France;GenBank;NA;KR007070  
Lepidoptera;Lycaenidae;Lysandra;Lysandra coridon;Italy;GenBank;NA;KR007072  
Lepidoptera;Lycaenidae;Lysandra;Lysandra coridon;Italy;GenBank;NA;KR007073  
Lepidoptera;Lycaenidae;Lysandra;Lysandra coridon;Italy;GenBank;NA;KR007074  
Lepidoptera;Lycaenidae;Lysandra;Lysandra coridon;Italy;GenBank;NA;KR007075  
Lepidoptera;Lycaenidae;Lysandra;Lysandra coridon;Switzerland;GenBank;NA;KR007076  
Lepidoptera;Lycaenidae;Lysandra;Lysandra coridon;Switzerland;GenBank;NA;KR007077  
Lepidoptera;Lycaenidae;Lysandra;Lysandra coridon;Switzerland;GenBank;NA;KR007078  
Lepidoptera;Lycaenidae;Lysandra;Lysandra coridon;Switzerland;GenBank;NA;KR007079  
Lepidoptera;Lycaenidae;Lysandra;Lysandra coridon;Switzerland;GenBank;NA;KR007080  
Lepidoptera;Nymphalidae;Hyponephele;Hyponephele lycaon;Spain;Bold;GBGL37335-19;KT448686  
Lepidoptera;Lycaenidae;Scolitantides;Scolitantides orion;Finland;GenBank;NA;KT782365  
Lepidoptera;Nymphalidae;Hipparchia;Hipparchia hermione;Latvia;GenBank;NA;KT782440

Lepidoptera;Lycaenidae;Polyommatus;Polyommatus damon;Latvia;GenBank;NA;KT782578  
Lepidoptera;Nymphalidae;Euphydryas;Euphydryas intermedia;Russia;GenBank;NA;KT989872  
Lepidoptera;Nymphalidae;Erebia;Erebia pronoe;Slovakia;GenBank;NA;KX277936  
Lepidoptera;Nymphalidae;Erebia;Erebia pronoe;Slovakia;GenBank;NA;KX277937  
Lepidoptera;Nymphalidae;Erebia;Erebia pronoe;Slovakia;GenBank;NA;KX277938  
Lepidoptera;Nymphalidae;Erebia;Erebia pronoe;Slovakia;GenBank;NA;KX277939  
Lepidoptera;Nymphalidae;Erebia;Erebia pronoe;Slovakia;GenBank;NA;KX277940  
Lepidoptera;Nymphalidae;Erebia;Erebia pronoe;Slovakia;GenBank;NA;KX277941  
Lepidoptera;Nymphalidae;Erebia;Erebia pronoe;Slovakia;GenBank;NA;KX277942  
Lepidoptera;Nymphalidae;Erebia;Erebia pronoe;Slovakia;GenBank;NA;KX277943  
Lepidoptera;Nymphalidae;Erebia;Erebia pronoe;Slovakia;GenBank;NA;KX277944  
Lepidoptera;Nymphalidae;Erebia;Erebia pronoe;Slovakia;GenBank;NA;KX277945  
Lepidoptera;Nymphalidae;Erebia;Erebia pronoe;Slovakia;GenBank;NA;KX277946  
Lepidoptera;Nymphalidae;Erebia;Erebia pronoe;Slovakia;GenBank;NA;KX277947  
Lepidoptera;Nymphalidae;Erebia;Erebia pronoe;Slovakia;GenBank;NA;KX277948  
Lepidoptera;Nymphalidae;Erebia;Erebia pronoe;Italy;GenBank;NA;KX277949  
Lepidoptera;Nymphalidae;Erebia;Erebia pronoe;Italy;GenBank;NA;KX277950  
Lepidoptera;Nymphalidae;Erebia;Erebia pronoe;Italy;GenBank;NA;KX277951  
Lepidoptera;Nymphalidae;Erebia;Erebia pronoe;Italy;GenBank;NA;KX277952  
Lepidoptera;Nymphalidae;Erebia;Erebia pronoe;Italy;GenBank;NA;KX277953  
Lepidoptera;Nymphalidae;Erebia;Erebia pronoe;Italy;GenBank;NA;KX277954  
Lepidoptera;Nymphalidae;Erebia;Erebia pronoe;Italy;GenBank;NA;KX277955  
Lepidoptera;Nymphalidae;Erebia;Erebia pronoe;Spain;GenBank;NA;KX277956  
Lepidoptera;Nymphalidae;Erebia;Erebia pronoe;Spain;GenBank;NA;KX277957  
Lepidoptera;Nymphalidae;Erebia;Erebia pronoe;Spain;GenBank;NA;KX277958  
Lepidoptera;Nymphalidae;Erebia;Erebia pronoe;Spain;GenBank;NA;KX277959  
Lepidoptera;Nymphalidae;Erebia;Erebia pronoe;Spain;GenBank;NA;KX277960  
Lepidoptera;Nymphalidae;Erebia;Erebia pronoe;Spain;GenBank;NA;KX277961  
Lepidoptera;Nymphalidae;Erebia;Erebia pronoe;Spain;GenBank;NA;KX277962  
Lepidoptera;Nymphalidae;Aglais;Aglais urticae;Poland;Bold;GBGL31771-19;KY128341  
Lepidoptera;Nymphalidae;Erebia;Erebia aethiopellus;Italy;Bold;GBGL36886-19;LC340553  
Lepidoptera;Nymphalidae;Erebia;Erebia aethiopellus;Italy;Bold;GBGL36887-19;LC340562  
Lepidoptera;Nymphalidae;Erebia;Erebia aethiopellus;Italy;Bold;GBGL36888-19;LC340683  
Lepidoptera;Nymphalidae;Erebia;Erebia aethiopellus;Italy;Bold;GBGL36889-19;LC340692  
Lepidoptera;Nymphalidae;Aglais;Aglais urticae;Sweden;Bold;GBMNC57277-20;LC471701  
Lepidoptera;Lycaenidae;Aricia;Aricia agestis;United Kingdom;Bold;SPMIS061-22;LR990279.1  
Lepidoptera;Lycaenidae;Plebejus;Plebejus argus;Serbia;GenBank;NA;LT219847  
Lepidoptera;Lycaenidae;Plebejus;Plebejus argus;Russia;GenBank;NA;LT219904  
Lepidoptera;Lycaenidae;Plebejus;Plebejus argus;Russia;GenBank;NA;LT219905  
Lepidoptera;Lycaenidae;Polyommatus;Polyommatus amandus;Russia;GenBank;NA;LT628553  
Lepidoptera;Lycaenidae;Polyommatus;Polyommatus amandus;Russia;GenBank;NA;LT628556  
Lepidoptera;Lycaenidae;Aricia;Aricia agestis;Greece;GenBank;NA;LT628804  
Lepidoptera;Lycaenidae;Aricia;Aricia agestis;Greece;GenBank;NA;LT628805  
Lepidoptera;Lycaenidae;Polyommatus;Polyommatus dorylas;Romania;GenBank;NA;LT628881  
Lepidoptera;Lycaenidae;Phengaris;Phengaris arion;Russia;GenBank;NA;LT628891  
Lepidoptera;Lycaenidae;Phengaris;Phengaris arion;Russia;GenBank;NA;LT628892  
Lepidoptera;Lycaenidae;Phengaris;Phengaris arion;Russia;GenBank;NA;LT628893  
Lepidoptera;Lycaenidae;Phengaris;Phengaris arion;Russia;GenBank;NA;LT628894  
Lepidoptera;Lycaenidae;Phengaris;Phengaris arion;Russia;GenBank;NA;LT628895  
Lepidoptera;Lycaenidae;Phengaris;Phengaris arion;Russia;GenBank;NA;LT628896  
Lepidoptera;Lycaenidae;Aricia;Aricia agestis;United Kingdom;GenBank;NA;LT628915  
Lepidoptera;Lycaenidae;Aricia;Aricia agestis;United Kingdom;GenBank;NA;LT628916  
Lepidoptera;Lycaenidae;Polyommatus;Polyommatus amandus;Sweden;GenBank;NA;LT628930  
Lepidoptera;Lycaenidae;Phengaris;Phengaris alcon;Denmark;GenBank;NA;LT628931  
Lepidoptera;Lycaenidae;Phengaris;Phengaris alcon;Denmark;GenBank;NA;LT628932  
Lepidoptera;Lycaenidae;Phengaris;Phengaris alcon;Denmark;GenBank;NA;LT628933  
Lepidoptera;Lycaenidae;Phengaris;Phengaris alcon;Denmark;GenBank;NA;LT628934  
Lepidoptera;Lycaenidae;Phengaris;Phengaris alcon;Denmark;GenBank;NA;LT628935  
Lepidoptera;Lycaenidae;Phengaris;Phengaris alcon;Denmark;GenBank;NA;LT628936  
Lepidoptera;Lycaenidae;Phengaris;Phengaris alcon;Denmark;GenBank;NA;LT628937  
Lepidoptera;Lycaenidae;Phengaris;Phengaris alcon;Denmark;GenBank;NA;LT628938  
Lepidoptera;Lycaenidae;Phengaris;Phengaris alcon;Denmark;GenBank;NA;LT628939  
Lepidoptera;Lycaenidae;Phengaris;Phengaris alcon;Denmark;GenBank;NA;LT628940  
Lepidoptera;Lycaenidae;Cyaniris;Cyaniris semiargus;Sweden;GenBank;NA;LT628941  
Lepidoptera;Lycaenidae;Phengaris;Phengaris alcon;Denmark;GenBank;NA;LT628942  
Lepidoptera;Lycaenidae;Phengaris;Phengaris alcon;Denmark;GenBank;NA;LT628943  
Lepidoptera;Lycaenidae;Phengaris;Phengaris alcon;Denmark;GenBank;NA;LT628944  
Lepidoptera;Lycaenidae;Phengaris;Phengaris alcon;Denmark;GenBank;NA;LT628945  
Lepidoptera;Lycaenidae;Phengaris;Phengaris alcon;Denmark;GenBank;NA;LT628946  
Lepidoptera;Lycaenidae;Phengaris;Phengaris alcon;Denmark;GenBank;NA;LT628947  
Lepidoptera;Lycaenidae;Phengaris;Phengaris alcon;Denmark;GenBank;NA;LT628948  
Lepidoptera;Lycaenidae;Phengaris;Phengaris alcon;Denmark;GenBank;NA;LT628949  
Lepidoptera;Lycaenidae;Phengaris;Phengaris alcon;Denmark;GenBank;NA;LT628950  
Lepidoptera;Lycaenidae;Phengaris;Phengaris alcon;Denmark;GenBank;NA;LT628951  
Lepidoptera;Lycaenidae;Phengaris;Phengaris alcon;Denmark;GenBank;NA;LT628952  
Lepidoptera;Lycaenidae;Phengaris;Phengaris alcon;Denmark;GenBank;NA;LT628953  
Lepidoptera;Lycaenidae;Phengaris;Phengaris alcon;Denmark;GenBank;NA;LT628954  
Lepidoptera;Lycaenidae;Polyommatus;Polyommatus icarus;Denmark;GenBank;NA;LT628955

Lepidoptera;Lycaenidae;Polyommatus;Polyommatus amandus;Sweden;GenBank;NA;LT628956  
Lepidoptera;Lycaenidae;Phengaris;Phengaris alcon;Denmark;GenBank;NA;LT628957  
Lepidoptera;Lycaenidae;Phengaris;Phengaris alcon;Denmark;GenBank;NA;LT628958  
Lepidoptera;Lycaenidae;Phengaris;Phengaris alcon;Denmark;GenBank;NA;LT628959  
Lepidoptera;Lycaenidae;Phengaris;Phengaris alcon;Denmark;GenBank;NA;LT628960  
Lepidoptera;Lycaenidae;Phengaris;Phengaris alcon;Denmark;GenBank;NA;LT628961  
Lepidoptera;Lycaenidae;Polyommatus;Polyommatus icarus;Denmark;GenBank;NA;LT628963  
Lepidoptera;Lycaenidae;Phengaris;Phengaris alcon;Denmark;GenBank;NA;LT628964  
Lepidoptera;Lycaenidae;Phengaris;Phengaris alcon;Denmark;GenBank;NA;LT628965  
Lepidoptera;Lycaenidae;Phengaris;Phengaris alcon;Denmark;GenBank;NA;LT628966  
Lepidoptera;Lycaenidae;Phengaris;Phengaris alcon;Denmark;GenBank;NA;LT628967  
Lepidoptera;Lycaenidae;Phengaris;Phengaris alcon;Denmark;GenBank;NA;LT628968  
Lepidoptera;Lycaenidae;Phengaris;Phengaris alcon;Denmark;GenBank;NA;LT628969  
Lepidoptera;Lycaenidae;Phengaris;Phengaris alcon;Denmark;GenBank;NA;LT628970  
Lepidoptera;Lycaenidae;Phengaris;Phengaris alcon;Denmark;GenBank;NA;LT628971  
Lepidoptera;Lycaenidae;Phengaris;Phengaris alcon;Denmark;GenBank;NA;LT628972  
Lepidoptera;Lycaenidae;Phengaris;Phengaris arion;Sweden;GenBank;NA;LT628973  
Lepidoptera;Lycaenidae;Phengaris;Phengaris alcon;Denmark;GenBank;NA;LT628974  
Lepidoptera;Lycaenidae;Polyommatus;Polyommatus amandus;Bosnia and Herzegovina;GenBank;NA;LT628980  
Lepidoptera;Lycaenidae;Phengaris;Phengaris alcon;Serbia;GenBank;NA;LT628981  
Lepidoptera;Lycaenidae;Cyaniris;Cyaniris semiargus;Serbia;GenBank;NA;LT628982  
Lepidoptera;Lycaenidae;Phengaris;Phengaris arion;Serbia;GenBank;NA;LT628983  
Lepidoptera;Lycaenidae;Phengaris;Phengaris arion;Serbia;GenBank;NA;LT628984  
Lepidoptera;Lycaenidae;Plebejus;Plebejus argyrognomon;Serbia;GenBank;NA;LT628985  
Lepidoptera;Lycaenidae;Phengaris;Phengaris arion;Serbia;GenBank;NA;LT628988  
Lepidoptera;Lycaenidae;Phengaris;Phengaris arion;Serbia;GenBank;NA;LT628989  
Lepidoptera;Lycaenidae;Phengaris;Phengaris arion;Serbia;GenBank;NA;LT628990  
Lepidoptera;Lycaenidae;Lycaena;Lycaena alciphron;Montenegro;GenBank;NA;LT628991  
Lepidoptera;Lycaenidae;Phengaris;Phengaris arion;Serbia;GenBank;NA;LT628992  
Lepidoptera;Lycaenidae;Polyommatus;Polyommatus daphnis;Montenegro;GenBank;NA;LT628993  
Lepidoptera;Lycaenidae;Phengaris;Phengaris alcon;Serbia;GenBank;NA;LT628994  
Lepidoptera;Lycaenidae;Phengaris;Phengaris alcon;Serbia;GenBank;NA;LT628998  
Lepidoptera;Lycaenidae;Plebejus;Plebejus argus;Serbia;GenBank;NA;LT628999  
Lepidoptera;Lycaenidae;Polyommatus;Polyommatus icarus;France;GenBank;NA;LT629001  
Lepidoptera;Lycaenidae;Polyommatus;Polyommatus icarus;Turkey;GenBank;NA;LT629002  
Lepidoptera;Lycaenidae;Aricia;Aricia agestis;Turkey;GenBank;NA;LT629003  
Lepidoptera;Lycaenidae;Polyommatus;Polyommatus icarus;Turkey;GenBank;NA;LT629004  
Lepidoptera;Lycaenidae;Aricia;Aricia agestis;Belgium;GenBank;NA;LT629005  
Lepidoptera;Lycaenidae;Polyommatus;Polyommatus icarus;Finland;GenBank;NA;LT629006  
Lepidoptera;Lycaenidae;Polyommatus;Polyommatus icarus;Romania;GenBank;NA;LT629007  
Lepidoptera;Lycaenidae;Polyommatus;Polyommatus icarus;Spain;GenBank;NA;LT629008  
Lepidoptera;Lycaenidae;Polyommatus;Polyommatus icarus;Spain;GenBank;NA;LT629009  
Lepidoptera;Lycaenidae;Polyommatus;Polyommatus icarus;Spain;GenBank;NA;LT629010  
Lepidoptera;Lycaenidae;Polyommatus;Polyommatus icarus;Turkey;GenBank;NA;LT629011  
Lepidoptera;Lycaenidae;Polyommatus;Polyommatus icarus;Turkey;GenBank;NA;LT629012  
Lepidoptera;Lycaenidae;Polyommatus;Polyommatus icarus;Turkey;GenBank;NA;LT629013  
Lepidoptera;Lycaenidae;Aricia;Aricia agestis;Serbia;GenBank;NA;LT629016  
Lepidoptera;Lycaenidae;Phengaris;Phengaris alcon;Spain;GenBank;NA;LT629017  
Lepidoptera;Lycaenidae;Phengaris;Phengaris alcon;Spain;GenBank;NA;LT629018  
Lepidoptera;Lycaenidae;Phengaris;Phengaris alcon;Spain;GenBank;NA;LT629019  
Lepidoptera;Lycaenidae;Phengaris;Phengaris alcon;Spain;GenBank;NA;LT629020  
Lepidoptera;Lycaenidae;Phengaris;Phengaris alcon;Spain;GenBank;NA;LT629021  
Lepidoptera;Lycaenidae;Polyommatus;Polyommatus icarus;Spain;GenBank;NA;LT629022  
Lepidoptera;Lycaenidae;Polyommatus;Polyommatus icarus;Denmark;GenBank;NA;LT629023  
Lepidoptera;Lycaenidae;Polyommatus;Polyommatus icarus;Romania;GenBank;NA;LT629024  
Lepidoptera;Lycaenidae;Aricia;Aricia agestis;Romania;GenBank;NA;LT629025  
Lepidoptera;Lycaenidae;Polyommatus;Polyommatus icarus;Romania;GenBank;NA;LT629026  
Lepidoptera;Lycaenidae;Polyommatus;Polyommatus icarus;Romania;GenBank;NA;LT629027  
Lepidoptera;Lycaenidae;Aricia;Aricia agestis;Romania;GenBank;NA;LT629028  
Lepidoptera;Lycaenidae;Polyommatus;Polyommatus icarus;Romania;GenBank;NA;LT629029  
Lepidoptera;Lycaenidae;Polyommatus;Polyommatus icarus;Bulgaria;GenBank;NA;LT629030  
Lepidoptera;Lycaenidae;Phengaris;Phengaris arion;Romania;GenBank;NA;LT629031  
Lepidoptera;Lycaenidae;Phengaris;Phengaris arion;Romania;GenBank;NA;LT629032  
Lepidoptera;Lycaenidae;Phengaris;Phengaris alcon;Spain;GenBank;NA;LT629033  
Lepidoptera;Lycaenidae;Phengaris;Phengaris alcon;Spain;GenBank;NA;LT629034  
Lepidoptera;Lycaenidae;Polyommatus;Polyommatus icarus;Spain;GenBank;NA;LT629035  
Lepidoptera;Lycaenidae;Polyommatus;Polyommatus icarus;Spain;GenBank;NA;LT629036  
Lepidoptera;Lycaenidae;Polyommatus;Polyommatus icarus;Spain;GenBank;NA;LT629037  
Lepidoptera;Lycaenidae;Polyommatus;Polyommatus icarus;Spain;GenBank;NA;LT629038  
Lepidoptera;Lycaenidae;Polyommatus;Polyommatus icarus;Spain;GenBank;NA;LT629039  
Lepidoptera;Lycaenidae;Plebejus;Plebejus argus;Spain;GenBank;NA;LT629040  
Lepidoptera;Lycaenidae;Polyommatus;Polyommatus icarus;Spain;GenBank;NA;LT629041  
Lepidoptera;Lycaenidae;Polyommatus;Polyommatus icarus;Greece;GenBank;NA;LT629042  
Lepidoptera;Lycaenidae;Polyommatus;Polyommatus icarus;Greece;GenBank;NA;LT629043  
Lepidoptera;Nymphalidae;Boloria;Boloria selene;Russia;GenBank;NA;LT795285  
Lepidoptera;Nymphalidae;Boloria;Boloria selene;Russia;GenBank;NA;LT795291  
Lepidoptera;Nymphalidae;Boloria;Boloria selene;Belarus;GenBank;NA;LT795292

Lepidoptera;Nymphalidae;Boloria;Boloria selene;Belarus;GenBank;NA;LT795293  
 Lepidoptera;Nymphalidae;Boloria;Boloria selene;Russia;GenBank;NA;LT795294  
 Lepidoptera;Nymphalidae;Boloria;Boloria selene;Sweden;GenBank;NA;LT795296  
 Lepidoptera;Nymphalidae;Boloria;Boloria selene;Norway;GenBank;NA;LT795297  
 Lepidoptera;Nymphalidae;Boloria;Boloria selene;Poland;GenBank;NA;LT795298  
 Lepidoptera;Nymphalidae;Boloria;Boloria selene;Czech Republic;GenBank;NA;LT795299  
 Lepidoptera;Nymphalidae;Boloria;Boloria selene;Czech Republic;GenBank;NA;LT795300  
 Lepidoptera;Nymphalidae;Boloria;Boloria selene;Czech Republic;GenBank;NA;LT795301  
 Lepidoptera;Nymphalidae;Boloria;Boloria selene;Czech Republic;GenBank;NA;LT795302  
 Lepidoptera;Nymphalidae;Boloria;Boloria selene;Czech Republic;GenBank;NA;LT795303  
 Lepidoptera;Nymphalidae;Boloria;Boloria selene;Czech Republic;GenBank;NA;LT795304  
 Lepidoptera;Nymphalidae;Boloria;Boloria selene;Czech Republic;GenBank;NA;LT795305  
 Lepidoptera;Nymphalidae;Boloria;Boloria selene;Russia;GenBank;NA;LT795306  
 Lepidoptera;Nymphalidae;Boloria;Boloria selene;Russia;GenBank;NA;LT795307  
 Lepidoptera;Nymphalidae;Boloria;Boloria selene;Russia;GenBank;NA;LT795308  
 Lepidoptera;Nymphalidae;Boloria;Boloria selene;Czech Republic;GenBank;NA;LT795309  
 Lepidoptera;Nymphalidae;Boloria;Boloria selene;Czech Republic;GenBank;NA;LT795310  
 Lepidoptera;Nymphalidae;Boloria;Boloria selene;Czech Republic;GenBank;NA;LT795311  
 Lepidoptera;Nymphalidae;Boloria;Boloria selene;Czech Republic;GenBank;NA;LT795312  
 Lepidoptera;Nymphalidae;Boloria;Boloria selene;Czech Republic;GenBank;NA;LT795313  
 Lepidoptera;Nymphalidae;Boloria;Boloria selene;Romania;GenBank;NA;LT795314  
 Lepidoptera;Nymphalidae;Boloria;Boloria selene;Romania;GenBank;NA;LT795315  
 Lepidoptera;Nymphalidae;Boloria;Boloria selene;Denmark;GenBank;NA;LT795316  
 Lepidoptera;Nymphalidae;Boloria;Boloria selene;Denmark;GenBank;NA;LT795317  
 Lepidoptera;Nymphalidae;Boloria;Boloria selene;Denmark;GenBank;NA;LT795318  
 Lepidoptera;Nymphalidae;Boloria;Boloria selene;Denmark;GenBank;NA;LT795319  
 Lepidoptera;Nymphalidae;Boloria;Boloria selene;Denmark;GenBank;NA;LT795320  
 Lepidoptera;Nymphalidae;Boloria;Boloria selene;Denmark;GenBank;NA;LT795321  
 Lepidoptera;Nymphalidae;Boloria;Boloria selene;Denmark;GenBank;NA;LT795322  
 Lepidoptera;Nymphalidae;Boloria;Boloria selene;Russia;GenBank;NA;LT795323  
 Lepidoptera;Nymphalidae;Boloria;Boloria selene;Russia;GenBank;NA;LT795324  
 Lepidoptera;Nymphalidae;Boloria;Boloria selene;Russia;GenBank;NA;LT795325  
 Lepidoptera;Nymphalidae;Boloria;Boloria selene;Russia;GenBank;NA;LT795326  
 Lepidoptera;Nymphalidae;Boloria;Boloria selene;Spain;GenBank;NA;LT795327  
 Lepidoptera;Nymphalidae;Boloria;Boloria selene;Spain;GenBank;NA;LT795328  
 Lepidoptera;Nymphalidae;Boloria;Boloria selene;Czech Republic;GenBank;NA;LT795329  
 Lepidoptera;Nymphalidae;Boloria;Boloria selene;Czech Republic;GenBank;NA;LT795330  
 Lepidoptera;Nymphalidae;Boloria;Boloria selene;Czech Republic;GenBank;NA;LT795331  
 Lepidoptera;Nymphalidae;Boloria;Boloria selene;Czech Republic;GenBank;NA;LT795332  
 Lepidoptera;Nymphalidae;Boloria;Boloria selene;Czech Republic;GenBank;NA;LT795333  
 Lepidoptera;Nymphalidae;Boloria;Boloria selene;Czech Republic;GenBank;NA;LT795334  
 Lepidoptera;Nymphalidae;Boloria;Boloria selene;Czech Republic;GenBank;NA;LT795335  
 Lepidoptera;Nymphalidae;Boloria;Boloria selene;Czech Republic;GenBank;NA;LT795336  
 Lepidoptera;Nymphalidae;Boloria;Boloria selene;Czech Republic;GenBank;NA;LT795337  
 Lepidoptera;Nymphalidae;Boloria;Boloria selene;Czech Republic;GenBank;NA;LT795338  
 Lepidoptera;Nymphalidae;Euphydryas;Euphydryas aurinia;Portugal;GenBank;NA;MF458706  
 Lepidoptera;Lycaenidae;Scolitantides;Scolitantides orion;Albania;GenBank;NA;MH407225  
 Lepidoptera;Pieridae;Pieris;Pieris rapae;Italy;GenBank;NA;MH418624  
 Lepidoptera;Pieridae;Pieris;Pieris rapae;Italy;GenBank;NA;MH418752  
 Lepidoptera;Lycaenidae;Celastrina;Celastrina argiolus;Italy;GenBank;NA;MH419164  
 Lepidoptera;Nymphalidae;Hipparchia;Hipparchia fagi;Italy;GenBank;NA;MN140412  
 Lepidoptera;Lycaenidae;Polyommatus;Polyommatus celina;Spain;GenBank;NA;MN196663  
 Lepidoptera;Lycaenidae;Polyommatus;Polyommatus icarus;Spain;GenBank;NA;MN196664  
 Lepidoptera;Nymphalidae;Neptis;Neptis rivularis;Poland;GenBank;NA;MT283600  
 Lepidoptera;Nymphalidae;Hipparchia;Hipparchia hermione;Spain;GenBank;NA;MT542035  
 Lepidoptera;Lycaenidae;Scolitantides;Scolitantides orion;Poland;GenBank;NA;MT820115  
 Lepidoptera;Lycaenidae;Scolitantides;Scolitantides orion;Poland;GenBank;NA;MT820116  
 Lepidoptera;Lycaenidae;Aricia;Aricia artaxerxes;Montenegro;GenBank;NA;MT883946  
 Lepidoptera;Lycaenidae;Aricia;Aricia artaxerxes;Sweden;GenBank;NA;MT883959  
 Lepidoptera;Nymphalidae;Coenonympha;Coenonympha oedippus;Slovenia;GenBank;NA;MW303898  
 Lepidoptera;Nymphalidae;Coenonympha;Coenonympha oedippus;Slovenia;GenBank;NA;MW303899  
 Lepidoptera;Nymphalidae;Coenonympha;Coenonympha oedippus;Slovenia;GenBank;NA;MW303900  
 Lepidoptera;Nymphalidae;Coenonympha;Coenonympha oedippus;Slovenia;GenBank;NA;MW303901  
 Lepidoptera;Nymphalidae;Coenonympha;Coenonympha oedippus;Slovenia;GenBank;NA;MW303902  
 Lepidoptera;Nymphalidae;Coenonympha;Coenonympha oedippus;Slovenia;GenBank;NA;MW303903  
 Lepidoptera;Lycaenidae;Lycaena;Lycaena phlaeas;Norway;Bold;GBMND21139-21;MW431042  
 Lepidoptera;Pieridae;Anthocharis;Anthocharis cardamines;Turkey;Bold;GBMND23406-21;MW431044  
 Lepidoptera;Nymphalidae;Erebia;Erebia medusa;Norway;Bold;GBMND22110-21;MW431052  
 Lepidoptera;Lycaenidae;Hypaurotis;Hypaurotis quercus;Hungary;GenBank;NA;MW441622  
 Lepidoptera;Lycaenidae;Hypaurotis;Hypaurotis quercus;Hungary;GenBank;NA;MW441624  
 Lepidoptera;Nymphalidae;Hyponephele;Hyponephele lycaon;Poland;Bold;EULEP4866-16;MW501381  
 Lepidoptera;Nymphalidae;Aglais;Aglais urticae;Latvia;Bold;EULEP313-14;MW501843  
 Lepidoptera;Nymphalidae;Hyponephele;Hyponephele lycaon;France;Bold;EULEP4091-16;MW502368  
 Lepidoptera;Pieridae;Leptidea;Leptidea reali;Spain;GenBank;NA;MW750512  
 Lepidoptera;Pieridae;Leptidea;Leptidea sinapis;Russia;GenBank;NA;MW750513  
 Lepidoptera;Pieridae;Leptidea;Leptidea sinapis;Russia;GenBank;NA;MW750693  
 Lepidoptera;Pieridae;Leptidea;Leptidea sinapis;Russia;GenBank;NA;MW750694  
 Lepidoptera;Pieridae;Pieris;Pieris napi;Sweden;Bold;GBMND76647-21;MW768130

Lepidoptera;Lycaenidae;Aricia;Aricia eumedon;Italy;GenBank;NA;MW861639  
 Lepidoptera;Lycaenidae;Aricia;Aricia eumedon;Serbia;GenBank;NA;MW861640  
 Lepidoptera;Lycaenidae;Aricia;Aricia eumedon;Greece;GenBank;NA;MW861641  
 Lepidoptera;Lycaenidae;Aricia;Aricia eumedon;France;GenBank;NA;MW861642  
 Lepidoptera;Lycaenidae;Aricia;Aricia eumedon;Ukraine;GenBank;NA;MW861643  
 Lepidoptera;Lycaenidae;Aricia;Aricia eumedon;Spain;GenBank;NA;MW861645  
 Lepidoptera;Lycaenidae;Aricia;Aricia eumedon;Italy;GenBank;NA;MW861647  
 Lepidoptera;Lycaenidae;Aricia;Aricia eumedon;Italy;GenBank;NA;MW861648  
 Lepidoptera;Lycaenidae;Aricia;Aricia eumedon;Switzerland;GenBank;NA;MW861649  
 Lepidoptera;Lycaenidae;Aricia;Aricia eumedon;Austria;GenBank;NA;MW861650  
 Lepidoptera;Lycaenidae;Aricia;Aricia eumedon;Italy;GenBank;NA;MW861651  
 Lepidoptera;Lycaenidae;Aricia;Aricia eumedon;Italy;GenBank;NA;MW861652  
 Lepidoptera;Lycaenidae;Aricia;Aricia eumedon;Sweden;GenBank;NA;MW861653  
 Lepidoptera;Lycaenidae;Aricia;Aricia eumedon;Serbia;GenBank;NA;MW861654  
 Lepidoptera;Lycaenidae;Aricia;Aricia eumedon;Albania;GenBank;NA;MW861655  
 Lepidoptera;Lycaenidae;Aricia;Aricia eumedon;Estonia;GenBank;NA;MW861656  
 Lepidoptera;Lycaenidae;Aricia;Aricia eumedon;Spain;GenBank;NA;MW861658  
 Lepidoptera;Lycaenidae;Aricia;Aricia eumedon;Spain;GenBank;NA;MW861659  
 Lepidoptera;Lycaenidae;Aricia;Aricia eumedon;Spain;GenBank;NA;MW861662  
 Lepidoptera;Lycaenidae;Aricia;Aricia eumedon;Spain;GenBank;NA;MW861663  
 Lepidoptera;Lycaenidae;Aricia;Aricia eumedon;Spain;GenBank;NA;MW861664  
 Lepidoptera;Lycaenidae;Aricia;Aricia eumedon;Spain;GenBank;NA;MW861668  
 Lepidoptera;Lycaenidae;Aricia;Aricia eumedon;Spain;GenBank;NA;MW861669  
 Lepidoptera;Lycaenidae;Aricia;Aricia eumedon;Sweden;GenBank;NA;MW861674  
 Lepidoptera;Lycaenidae;Aricia;Aricia eumedon;Sweden;GenBank;NA;MW861675  
 Lepidoptera;Lycaenidae;Aricia;Aricia eumedon;Spain;GenBank;NA;MW861676  
 Lepidoptera;Lycaenidae;Aricia;Aricia eumedon;Spain;GenBank;NA;MW861677  
 Lepidoptera;Lycaenidae;Aricia;Aricia eumedon;Spain;GenBank;NA;MW861678  
 Lepidoptera;Lycaenidae;Aricia;Aricia eumedon;Spain;GenBank;NA;MW861679  
 Lepidoptera;Lycaenidae;Aricia;Aricia eumedon;Sweden;GenBank;NA;MW861680  
 Lepidoptera;Nymphalidae;Maniola;Maniola jurtina;Spain;Bold;GBMND76330-21;MW868959  
 Lepidoptera;Nymphalidae;Euphydryas;Euphydryas intermedia;Russia;GenBank;NA;MZ128129  
 Lepidoptera;Nymphalidae;Euphydryas;Euphydryas intermedia;Russia;GenBank;NA;MZ128130  
 Lepidoptera;Nymphalidae;Euphydryas;Euphydryas intermedia;Finland;GenBank;NA;MZ128131  
 Lepidoptera;Nymphalidae;Euphydryas;Euphydryas intermedia;Finland;GenBank;NA;MZ128132  
 Lepidoptera;Nymphalidae;Euphydryas;Euphydryas maturna;Finland;GenBank;NA;MZ128133  
 Lepidoptera;Nymphalidae;Euphydryas;Euphydryas maturna;Finland;GenBank;NA;MZ128134  
 Lepidoptera;Nymphalidae;Euphydryas;Euphydryas intermedia;Russia;GenBank;NA;MZ128135  
 Lepidoptera;Lycaenidae;Callophrys;Callophrys rubi;Russia;GenBank;NA;OL457027  
 Lepidoptera;Lycaenidae;Callophrys;Callophrys rubi;Russia;GenBank;NA;OL457028  
 Lepidoptera;Lycaenidae;Callophrys;Callophrys rubi;Russia;GenBank;NA;OL457029  
 Lepidoptera;Lycaenidae;Callophrys;Callophrys rubi;Russia;GenBank;NA;OL457030  
 Lepidoptera;Lycaenidae;Callophrys;Callophrys rubi;Russia;GenBank;NA;OL457031  
 Lepidoptera;Lycaenidae;Callophrys;Callophrys rubi;Russia;GenBank;NA;OL457032  
 Lepidoptera;Nymphalidae;Melitaea;Melitaea phoebe;Spain;GenBank;NA;OL873481  
 Lepidoptera;Nymphalidae;Melitaea;Melitaea phoebe;Spain;GenBank;NA;OL873483  
 Lepidoptera;Nymphalidae;Melitaea;Melitaea phoebe;Spain;GenBank;NA;OL873484  
 Lepidoptera;Nymphalidae;Melitaea;Melitaea phoebe;Spain;GenBank;NA;OL873485  
 Lepidoptera;Nymphalidae;Melitaea;Melitaea phoebe;Spain;GenBank;NA;OL873487  
 Lepidoptera;Nymphalidae;Melitaea;Melitaea phoebe;Portugal;GenBank;NA;OL873488  
 Lepidoptera;Nymphalidae;Melitaea;Melitaea phoebe;Spain;GenBank;NA;OL873489  
 Lepidoptera;Nymphalidae;Melitaea;Melitaea phoebe;Spain;GenBank;NA;OL873490  
 Lepidoptera;Nymphalidae;Melitaea;Melitaea phoebe;Spain;GenBank;NA;OL873491  
 Lepidoptera;Nymphalidae;Melitaea;Melitaea phoebe;Romania;GenBank;NA;OL873496  
 Lepidoptera;Nymphalidae;Melitaea;Melitaea phoebe;Spain;GenBank;NA;OL873500  
 Lepidoptera;Nymphalidae;Melitaea;Melitaea phoebe;Spain;GenBank;NA;OL873501  
 Lepidoptera;Nymphalidae;Melitaea;Melitaea phoebe;Spain;GenBank;NA;OL873504  
 Lepidoptera;Nymphalidae;Melitaea;Melitaea phoebe;Spain;GenBank;NA;OL873505  
 Lepidoptera;Nymphalidae;Melitaea;Melitaea phoebe;Spain;GenBank;NA;OL873506  
 Lepidoptera;Nymphalidae;Melitaea;Melitaea phoebe;Spain;GenBank;NA;OL873521  
 Lepidoptera;Nymphalidae;Melitaea;Melitaea phoebe;Spain;GenBank;NA;OL873522  
 Lepidoptera;Nymphalidae;Melitaea;Melitaea phoebe;Spain;GenBank;NA;OL873524  
 Lepidoptera;Nymphalidae;Melitaea;Melitaea phoebe;Spain;GenBank;NA;OL873526  
 Lepidoptera;Nymphalidae;Melitaea;Melitaea phoebe;Portugal;GenBank;NA;OL873528  
 Lepidoptera;Nymphalidae;Melitaea;Melitaea phoebe;Portugal;GenBank;NA;OL873529  
 Lepidoptera;Nymphalidae;Melitaea;Melitaea phoebe;Spain;GenBank;NA;OL873530  
 Lepidoptera;Nymphalidae;Melitaea;Melitaea phoebe;Spain;GenBank;NA;OL873534  
 Lepidoptera;Nymphalidae;Melitaea;Melitaea phoebe;Spain;GenBank;NA;OL873535  
 Lepidoptera;Nymphalidae;Melitaea;Melitaea phoebe;Spain;GenBank;NA;OL873536  
 Lepidoptera;Nymphalidae;Melitaea;Melitaea phoebe;Spain;GenBank;NA;OL873538  
 Lepidoptera;Nymphalidae;Melitaea;Melitaea phoebe;Spain;GenBank;NA;OL873540  
 Lepidoptera;Nymphalidae;Melitaea;Melitaea phoebe;Spain;GenBank;NA;OL873542  
 Lepidoptera;Pieridae;Colias;Colias hyale;Austria;GenBank;NA;ON436476  
 Lepidoptera;Nymphalidae;Aglais;Aglais urticae;Russia;Bold;RDBBC321-05;NA  
 Lepidoptera;Nymphalidae;Aglais;Aglais urticae;Russia;Bold;RDBBC320-05;NA  
 Lepidoptera;Nymphalidae;Aglais;Aglais urticae;Russia;Bold;RDBBC322-05;NA  
 Lepidoptera;Nymphalidae;Aglais;Aglais urticae;Russia;Bold;RDBBC323-05;NA  
 Lepidoptera;Nymphalidae;Apatura;Apatura ilia;Poland;Bold;EULEP6091-20;NA

Lepidoptera;Nymphalidae;Aphantopus;Aphantopus hyperantus;Poland;Bold;EULEP6088-20;NA  
 Lepidoptera;Pieridae;Aporia;Aporia crataegi;Spain;Bold;SHIBU015-13;NA  
 Lepidoptera;Nymphalidae;Araschnia;Araschnia levana;Poland;Bold;EULEP6092-20;NA  
 Lepidoptera;Nymphalidae;Argynnis;Argynnis aglaja;Sweden;Bold;EULEP6021-20;NA  
 Lepidoptera;Nymphalidae;Boloria;Boloria selene;Russia;Bold;RDBBC319-05;NA  
 Lepidoptera;Nymphalidae;Boloria;Boloria selene;Russia;Bold;HBNK056-07;NA  
 Lepidoptera;Nymphalidae;Boloria;Boloria selene;Denmark;Bold;SNA088-07;NA  
 Lepidoptera;Nymphalidae;Boloria;Boloria selene;Russia;Bold;HBNK054-07;NA  
 Lepidoptera;Nymphalidae;Boloria;Boloria selene;Russia;Bold;HBNK055-07;NA  
 Lepidoptera;Nymphalidae;Boloria;Boloria selene;Russia;Bold;HBNK057-07;NA  
 Lepidoptera;Nymphalidae;Boloria;Boloria selene;Russia;Bold;RDBBC316-05;NA  
 Lepidoptera;Nymphalidae;Boloria;Boloria selene;Russia;Bold;RDBBC318-05;NA  
 Lepidoptera;Nymphalidae;Boloria;Boloria selene;Russia;Bold;HBNK053-07;NA  
 Lepidoptera;Nymphalidae;Boloria;Boloria selene;Russia;Bold;HBNK052-07;NA  
 Lepidoptera;Nymphalidae;Boloria;Boloria thore;Russia;Bold;HBNK078-07;NA  
 Lepidoptera;Nymphalidae;Boloria;Boloria thore;Russia;Bold;HBNK076-07;NA  
 Lepidoptera;Nymphalidae;Boloria;Boloria thore;Russia;Bold;HBNK075-07;NA  
 Lepidoptera;Nymphalidae;Boloria;Boloria thore;Russia;Bold;HBNK077-07;NA  
 Lepidoptera;Nymphalidae;Boloria;Boloria thore;Russia;Bold;HBNK074-07;NA  
 Lepidoptera;Nymphalidae;Boloria;Boloria titania;Albania;Bold;EULEP6232-20;NA  
 Lepidoptera;Nymphalidae;Brenthis;Brenthis ino;Albania;Bold;EULEP6217-20;NA  
 Lepidoptera;Hesperiidae;Carterocephalus;Carterocephalus palaemon;Albania;Bold;EULEP6228-20;NA  
 Lepidoptera;Nymphalidae;Coenonympha;Coenonympha arcania;Poland;Bold;EULEP6096-20;NA  
 Lepidoptera;Nymphalidae;Coenonympha;Coenonympha arcania;Sweden;Bold;EULEP6020-20;NA  
 Lepidoptera;Lycaenidae;Cupido;Cupido osiris;Albania;Bold;EULEP6229-20;NA  
 Lepidoptera;Nymphalidae;Erebia;Erebia aethiops;Albania;Bold;EULEP6219-20;NA  
 Lepidoptera;Nymphalidae;Erebia;Erebia epiphron;Albania;Bold;EULEP6211-20;NA  
 Lepidoptera;Hesperiidae;Hesperia;Hesperia comma;Albania;Bold;EULEP6213-20;NA  
 Lepidoptera;Lycaenidae;Eumedonia;Eumedonia eumedon;Greece;Bold;EULEP6266-20;NA  
 Lepidoptera;Riodinidae;Hamearis;Hamearis lucina;Albania;Bold;EULEP6230-20;NA  
 Lepidoptera;Nymphalidae;Hyponephele;Hyponephele lycaon;Poland;Bold;EULEP6093-20;NA  
 Lepidoptera;Nymphalidae;Nymphalis;Nymphalis antiopa;Russia;Bold;HBNKB288-07;NA  
 Lepidoptera;Lycaenidae;Lycaena;Lycaena phlaeas;Romania;Bold;EULEP6013-20;NA  
 Lepidoptera;Lycaenidae;Lycaena;Lycaena thersamon;Albania;Bold;EULEP6233-20;NA  
 Lepidoptera;Lycaenidae;Lycaena;Lycaena tityrus;Albania;Bold;EULEP6218-20;NA  
 Lepidoptera;Lycaenidae;Lycaena;Lycaena virgaureae;Poland;Bold;EULEP6090-20;NA  
 Lepidoptera;Nymphalidae;Melanargia;Melanargia galathea;Poland;Bold;EULEP6097-20;NA  
 Lepidoptera;Nymphalidae;Melitaea;Melitaea diamina;Albania;Bold;EULEP6231-20;NA  
 Lepidoptera;Nymphalidae;Nymphalis;Nymphalis antiopa;Russia;Bold;HBNKB222-07;NA  
 Lepidoptera;Nymphalidae;Nymphalis;Nymphalis antiopa;Russia;Bold;HBNKB297-07;NA  
 Lepidoptera;Nymphalidae;Nymphalis;Nymphalis antiopa;Russia;Bold;HBNKB298-07;NA  
 Lepidoptera;Nymphalidae;Nymphalis;Nymphalis antiopa;Finland;Bold;RDHP380-06;NA  
 Lepidoptera;Nymphalidae;Nymphalis;Nymphalis antiopa;Russia;Bold;HBNKB287-07;NA  
 Lepidoptera;Hesperiidae;Ochlodes;Ochlodes sylvanus;Poland;Bold;EULEP6094-20;NA  
 Lepidoptera;Papilionidae;Papilio;Papilio machaon;Albania;Bold;EULEP6216-20;NA  
 Lepidoptera;Lycaenidae;Polyommatus;Polyommatus amandus;Albania;Bold;EULEP6220-20;NA  
 Lepidoptera;Lycaenidae;Polyommatus;Polyommatus icarus;Russia;Bold;WMB6631-18;NA  
 Lepidoptera;Lycaenidae;Polyommatus;Polyommatus icarus;Russia;Bold;WMB6630-18;NA  
 Lepidoptera;Pieridae;Pontia;Pontia callidice;Switzerland;Bold;WMB6886-19;NA  
 Lepidoptera;Pieridae;Pontia;Pontia edusa;Poland;Bold;EULEP6089-20;NA  
 Lepidoptera;Nymphalidae;Satyrus;Satyrus ferula;Albania;Bold;EULEP6214-20;NA  
 Lepidoptera;Hesperiidae;Thymelicus;Thymelicus lineola;Sweden;Bold;EULEP6019-20;NA  
 Lepidoptera;Nymphalidae;Vanessa;Vanessa cardui;Albania;Bold;EULEP6237-20;NA  
 Odonata;Aeshnidae;Aeshna;Aeshna juncea;Russia;GenBank;NA;AB708582  
 Odonata;Aeshnidae;Aeshna;Aeshna juncea;Russia;GenBank;NA;AB708583  
 Odonata;Aeshnidae;Aeshna;Aeshna juncea;Russia;GenBank;NA;AB708591  
 Odonata;Corduliidae;Somatochlora;Somatochlora alpestris;Russia;GenBank;NA;AB708911  
 Odonata;Corduliidae;Somatochlora;Somatochlora alpestris;Russia;GenBank;NA;AB708912  
 Odonata;Corduliidae;Somatochlora;Somatochlora metallica;Sweden;GenBank;NA;AB708931  
 Odonata;Corduliidae;Somatochlora;Somatochlora metallica;Sweden;GenBank;NA;AB708932  
 Odonata;Libellulidae;Sympetrum;Sympetrum depressiusculum;Russia;GenBank;NA;AB709125  
 Odonata;Libellulidae;Sympetrum;Sympetrum depressiusculum;Russia;GenBank;NA;AB709128  
 Odonata;Libellulidae;Sympetrum;Sympetrum depressiusculum;Russia;GenBank;NA;AB709129  
 Odonata;Libellulidae;Sympetrum;Sympetrum depressiusculum;Russia;GenBank;NA;AB709131  
 Odonata;Libellulidae;Sympetrum;Sympetrum depressiusculum;Russia;GenBank;NA;AB709132  
 Odonata;Libellulidae;Sympetrum;Sympetrum depressiusculum;Russia;GenBank;NA;AB709134  
 Odonata;Libellulidae;Sympetrum;Sympetrum depressiusculum;Russia;GenBank;NA;AB709135  
 Odonata;Libellulidae;Sympetrum;Sympetrum depressiusculum;Russia;GenBank;NA;AB709137  
 Odonata;Libellulidae;Sympetrum;Sympetrum depressiusculum;Russia;GenBank;NA;AB709139  
 Odonata;Libellulidae;Sympetrum;Sympetrum depressiusculum;Russia;GenBank;NA;AB709140  
 Odonata;Libellulidae;Sympetrum;Sympetrum depressiusculum;Russia;GenBank;NA;AB709141  
 Odonata;Libellulidae;Sympetrum;Sympetrum depressiusculum;Russia;GenBank;NA;AB709143  
 Odonata;Aeshnidae;Aeshna;Aeshna juncea;Finland;GenBank;NA;AB711458  
 Odonata;Aeshnidae;Aeshna;Aeshna subarctica;Finland;GenBank;NA;AB711462  
 Odonata;Aeshnidae;Aeshna;Aeshna juncea;Russia;GenBank;NA;AB711463  
 Odonata;Coenagrionidae;Ischnura;Ischnura elegans;Germany;GenBank;NA;HM376192  
 Odonata;Libellulidae;Leucorrhinia;Leucorrhinia pectoralis;Sweden;GenBank;NA;JN991193  
 Odonata;Libellulidae;Leucorrhinia;Leucorrhinia dubia;Sweden;GenBank;NA;JN991194

Odonata; Aeshnidae; Aeshna; Aeshna cyanea; Germany; GenBank; NA; KC912199  
 Odonata; Aeshnidae; Aeshna; Aeshna cyanea; Germany; GenBank; NA; KC912200  
 Odonata; Aeshnidae; Aeshna; Aeshna cyanea; Germany; GenBank; NA; KC912201  
 Odonata; Aeshnidae; Aeshna; Aeshna cyanea; Germany; GenBank; NA; KC912202  
 Odonata; Aeshnidae; Aeshna; Aeshna grandis; Germany; GenBank; NA; KC912203  
 Odonata; Aeshnidae; Aeshna; Aeshna mixta; Germany; GenBank; NA; KC912204  
 Odonata; Aeshnidae; Aeshna; Aeshna mixta; Germany; GenBank; NA; KC912205  
 Odonata; Aeshnidae; Brachytron; Brachytron pratense; France; GenBank; NA; KC912235  
 Odonata; Aeshnidae; Brachytron; Brachytron pratense; France; GenBank; NA; KC912236  
 Odonata; Libellulidae; Orthetrum; Orthetrum coerulescens; Italy; GenBank; NA; KC912263  
 Odonata; Libellulidae; Orthetrum; Orthetrum coerulescens; Italy; GenBank; NA; KC912264  
 Odonata; Libellulidae; Orthetrum; Orthetrum coerulescens; Italy; GenBank; NA; KC912265  
 Odonata; Libellulidae; Orthetrum; Orthetrum coerulescens; Germany; GenBank; NA; KC912266  
 Odonata; Libellulidae; Orthetrum; Orthetrum coerulescens; Germany; GenBank; NA; KC912267  
 Odonata; Libellulidae; Orthetrum; Orthetrum coerulescens; Germany; GenBank; NA; KC912268  
 Odonata; Libellulidae; Orthetrum; Orthetrum coerulescens; Germany; GenBank; NA; KC912269  
 Odonata; Libellulidae; Orthetrum; Orthetrum coerulescens; Germany; GenBank; NA; KC912270  
 Odonata; Libellulidae; Orthetrum; Orthetrum coerulescens; Germany; GenBank; NA; KC912271  
 Odonata; Coenagrionidae; Ceriagrion; Ceriagrion tenellum; Spain; GenBank; NA; KC912305  
 Odonata; Coenagrionidae; Ceriagrion; Ceriagrion tenellum; Spain; GenBank; NA; KC912306  
 Odonata; Coenagrionidae; Ceriagrion; Ceriagrion tenellum; Spain; GenBank; NA; KC912307  
 Odonata; Coenagrionidae; Ceriagrion; Ceriagrion tenellum; Spain; GenBank; NA; KC912308  
 Odonata; Coenagrionidae; Ceriagrion; Ceriagrion tenellum; Spain; GenBank; NA; KC912309  
 Odonata; Coenagrionidae; Enallagma; Enallagma cyathigerum; Spain; GenBank; NA; KC912310  
 Odonata; Coenagrionidae; Enallagma; Enallagma cyathigerum; Spain; GenBank; NA; KC912311  
 Odonata; Coenagrionidae; Enallagma; Enallagma cyathigerum; Spain; GenBank; NA; KC912312  
 Odonata; Coenagrionidae; Enallagma; Enallagma cyathigerum; Spain; GenBank; NA; KC912313  
 Odonata; Coenagrionidae; Enallagma; Enallagma cyathigerum; Spain; GenBank; NA; KC912314  
 Odonata; Aeshnidae; Aeshna; Aeshna juncea; Netherlands; GenBank; NA; KF369278  
 Odonata; Coenagrionidae; Ischnura; Ischnura elegans; Netherlands; GenBank; NA; KF369415  
 Odonata; Cordulegastridae; Cordulegaster; Cordulegaster bidentata; Montenegro; GenBank; NA; KF584922  
 Odonata; Cordulegastridae; Cordulegaster; Cordulegaster bidentata; Albania; GenBank; NA; KF584923  
 Odonata; Cordulegastridae; Cordulegaster; Cordulegaster bidentata; Albania; GenBank; NA; KF584924  
 Odonata; Cordulegastridae; Cordulegaster; Cordulegaster bidentata; Greece; GenBank; NA; KF584925  
 Odonata; Cordulegastridae; Cordulegaster; Cordulegaster bidentata; Greece; GenBank; NA; KF584926  
 Odonata; Cordulegastridae; Cordulegaster; Cordulegaster bidentata; Greece; GenBank; NA; KF584927  
 Odonata; Cordulegastridae; Cordulegaster; Cordulegaster bidentata; Greece; GenBank; NA; KF584928  
 Odonata; Cordulegastridae; Cordulegaster; Cordulegaster bidentata; Italy; Bold; GBMHO342-14; KF584929  
 Odonata; Cordulegastridae; Cordulegaster; Cordulegaster bidentata; Italy; Bold; GBMHO343-14; KF584930  
 Odonata; Cordulegastridae; Cordulegaster; Cordulegaster bidentata; Greece; GenBank; NA; KF584931  
 Odonata; Cordulegastridae; Cordulegaster; Cordulegaster boltonii iberica; Austria; GenBank; NA; KF584932  
 Odonata; Cordulegastridae; Cordulegaster; Cordulegaster boltonii; Italy; GenBank; NA; KF584933  
 Odonata; Cordulegastridae; Cordulegaster; Cordulegaster boltonii; Italy; GenBank; NA; KF584934  
 Odonata; Cordulegastridae; Cordulegaster; Cordulegaster heros; Greece; Bold; GBMHO338-14; KF584940  
 Odonata; Cordulegastridae; Cordulegaster; Cordulegaster trinacriae; Italy; GenBank; NA; KF584946  
 Odonata; Cordulegastridae; Cordulegaster; Cordulegaster boltonii iberica; Spain; GenBank; NA; KF584956  
 Odonata; Cordulegastridae; Cordulegaster; Cordulegaster boltonii  
 immaculifrons; France; GenBank; NA; KF584957  
 Odonata; Cordulegastridae; Cordulegaster; Cordulegaster bidentata; Germany; GenBank; NA; KF584958  
 Odonata; Cordulegastridae; Cordulegaster; Cordulegaster boltonii  
 boltonii; Portugal; GenBank; NA; KF584959  
 Odonata; Cordulegastridae; Cordulegaster; Cordulegaster boltonii  
 boltonii; France; GenBank; NA; KF584960  
 Odonata; Cordulegastridae; Cordulegaster; Cordulegaster boltonii iberica; Spain; GenBank; NA; KF584961  
 Odonata; Cordulegastridae; Cordulegaster; Cordulegaster boltonii iberica; Spain; GenBank; NA; KF584962  
 Odonata; Cordulegastridae; Cordulegaster; Cordulegaster bidentata; France; Bold; GBMHO324-14; KF584963  
 Odonata; Cordulegastridae; Cordulegaster; Cordulegaster boltonii algerica; Spain; GenBank; NA; KF584964  
 Odonata; Cordulegastridae; Cordulegaster; Cordulegaster boltonii  
 immaculifrons; Portugal; GenBank; NA; KF584965  
 Odonata; Cordulegastridae; Cordulegaster; Cordulegaster boltonii iberica; Spain; GenBank; NA; KF584967  
 Odonata; Cordulegastridae; Cordulegaster; Cordulegaster boltonii iberica; Spain; GenBank; NA; KF584968  
 Odonata; Aeshnidae; Anax; Anax imperator; Portugal; GenBank; NA; KF584974  
 Odonata; Aeshnidae; Aeshna; Aeshna juncea; Germany; GenBank; NA; KU180297  
 Odonata; Aeshnidae; Aeshna; Aeshna subarctica; Germany; GenBank; NA; KU180298  
 Odonata; Aeshnidae; Aeshna; Aeshna grandis; Germany; GenBank; NA; KU180299  
 Odonata; Aeshnidae; Aeshna; Aeshna cyanea; Belgium; GenBank; NA; KU180304  
 Odonata; Aeshnidae; Aeshna; Aeshna cyanea; Italy; GenBank; NA; KU180305  
 Odonata; Aeshnidae; Aeshna; Aeshna cyanea; Poland; GenBank; NA; KU180306  
 Odonata; Aeshnidae; Aeshna; Aeshna cyanea; Germany; GenBank; NA; KU180307  
 Odonata; Aeshnidae; Aeshna; Aeshna cyanea; Poland; GenBank; NA; KU180308  
 Odonata; Aeshnidae; Aeshna; Aeshna cyanea; Spain; GenBank; NA; KU180309  
 Odonata; Aeshnidae; Aeshna; Aeshna cyanea; Russia; GenBank; NA; KU180312  
 Odonata; Aeshnidae; Aeshna; Aeshna cyanea; Russia; GenBank; NA; KU180313  
 Odonata; Aeshnidae; Aeshna; Aeshna cyanea; Russia; GenBank; NA; KU180317  
 Odonata; Aeshnidae; Aeshna; Aeshna cyanea; Russia; GenBank; NA; KU180318  
 Odonata; Coenagrionidae; Pyrrhosoma; Pyrrhosoma nymphula; Belgium; GenBank; NA; KU220874  
 Odonata; Coenagrionidae; Pyrrhosoma; Pyrrhosoma nymphula; Turkey; GenBank; NA; KU220878

Odonata;Coenagrionidae;Pyrrhosoma;Pyrrhosoma nymphula;Portugal;GenBank;NA;KU220879  
 Odonata;Coenagrionidae;Pyrrhosoma;Pyrrhosoma nymphula;Portugal;GenBank;NA;KU220880  
 Odonata;Coenagrionidae;Pyrrhosoma;Pyrrhosoma nymphula;Portugal;GenBank;NA;KU220881  
 Odonata;Coenagrionidae;Pyrrhosoma;Pyrrhosoma nymphula;Portugal;GenBank;NA;KU220884  
 Odonata;Coenagrionidae;Pyrrhosoma;Pyrrhosoma nymphula;Macedonia;GenBank;NA;KU220885  
 Odonata;Coenagrionidae;Coenagrion;Coenagrion puella;Netherlands;GenBank;NA;KU695839  
 Odonata;Libellulidae;Leucorrhinia;Leucorrhinia dubia;Germany;GenBank;NA;LC366710  
 Odonata;Libellulidae;Leucorrhinia;Leucorrhinia dubia;Germany;GenBank;NA;LC366712  
 Odonata;Libellulidae;Libellula;Libellula quadrimaculata;Germany;GenBank;NA;LC366713  
 Odonata;Aeshnidae;Brachytron;Brachytron pratense;Germany;GenBank;NA;LC366714  
 Odonata;Libellulidae;Sympetrum;Sympetrum striolatum;Croatia;GenBank;NA;LC366852  
 Odonata;Libellulidae;Crocotthemis;Crocotthemis erythraea;Croatia;GenBank;NA;LC366854  
 Odonata;Libellulidae;Crocotthemis;Crocotthemis erythraea;Croatia;GenBank;NA;LC366855  
 Odonata;Libellulidae;Sympetrum;Sympetrum vulgatum;France;GenBank;NA;LT634113  
 Odonata;Libellulidae;Sympetrum;Sympetrum vulgatum;France;GenBank;NA;LT634114  
 Odonata;Libellulidae;Sympetrum;Sympetrum vulgatum;Finland;GenBank;NA;LT634115  
 Odonata;Libellulidae;Sympetrum;Sympetrum vulgatum;Finland;GenBank;NA;LT634116  
 Odonata;Libellulidae;Sympetrum;Sympetrum vulgatum;Spain;GenBank;NA;LT634117  
 Odonata;Libellulidae;Sympetrum;Sympetrum vulgatum;Spain;GenBank;NA;LT634118  
 Odonata;Libellulidae;Sympetrum;Sympetrum vulgatum;Spain;GenBank;NA;LT634119  
 Odonata;Libellulidae;Sympetrum;Sympetrum vulgatum;Spain;GenBank;NA;LT634120  
 Odonata;Libellulidae;Sympetrum;Sympetrum vulgatum;Spain;GenBank;NA;LT634121  
 Odonata;Libellulidae;Sympetrum;Sympetrum vulgatum;Spain;GenBank;NA;LT634122  
 Odonata;Libellulidae;Sympetrum;Sympetrum vulgatum;Spain;GenBank;NA;LT634123  
 Odonata;Libellulidae;Sympetrum;Sympetrum vulgatum;Spain;GenBank;NA;LT634124  
 Odonata;Cordulegastridae;Cordulegaster;Cordulegaster heros;Bulgaria;GenBank;NA;MK779811  
 Odonata;Cordulegastridae;Cordulegaster;Cordulegaster bidentata;Czech Republic;GenBank;NA;MK779814  
 Odonata;Aeshnidae;Aeshna;Aeshna juncea;France;GenBank;NA;MN735555  
 Odonata;Aeshnidae;Aeshna;Aeshna mixta;Russia;Bold;GBMND49018-21;MT001428  
 Odonata;Cordulegastridae;Cordulegaster;Cordulegaster bidentata;Bulgaria;GenBank;NA;MT811768  
 Odonata;Cordulegastridae;Cordulegaster;Cordulegaster bidentata;Bulgaria;GenBank;NA;MT811769  
 Odonata;Cordulegastridae;Cordulegaster;Cordulegaster bidentata;Bulgaria;GenBank;NA;MT811770  
 Odonata;Gomphidae;Gomphus;Gomphus flavipes;Romania;GenBank;NA;MW139673  
 Odonata;Coenagrionidae;Erythromma;Erythromma viridulum;Romania;GenBank;NA;MW139674  
 Odonata;Lestidae;Sympecma;Sympecma fusca;Albania;GenBank;NA;MW208367  
 Odonata;Lestidae;Sympecma;Sympecma fusca;Albania;GenBank;NA;MW208368  
 Odonata;Lestidae;Chalcolestes;Chalcolestes viridis;Bosnia and Herzegovina;GenBank;NA;MW208373  
 Odonata;Lestidae;Chalcolestes;Chalcolestes viridis;Montenegro;GenBank;NA;MW208374  
 Odonata;Lestidae;Chalcolestes;Chalcolestes parvidens;Bosnia and Herzegovina;GenBank;NA;MW208375  
 Odonata;Lestidae;Chalcolestes;Chalcolestes parvidens;Bosnia and Herzegovina;GenBank;NA;MW208376  
 Odonata;Lestidae;Chalcolestes;Chalcolestes parvidens;Austria;GenBank;NA;MW208377  
 Odonata;Libellulidae;Orthetrum;Orthetrum cancellatum;Albania;GenBank;NA;MW208378  
 Odonata;Libellulidae;Orthetrum;Orthetrum cancellatum;Albania;GenBank;NA;MW208379  
 Odonata;Coenagrionidae;Ischnura;Ischnura elegans;Croatia;GenBank;NA;MW208391  
 Odonata;Coenagrionidae;Ischnura;Ischnura elegans;Albania;GenBank;NA;MW208393  
 Odonata;Coenagrionidae;Ischnura;Ischnura elegans;Albania;GenBank;NA;MW208394  
 Odonata;Coenagrionidae;Ischnura;Ischnura elegans;Albania;GenBank;NA;MW208395  
 Odonata;Coenagrionidae;Ischnura;Ischnura elegans;Albania;GenBank;NA;MW208396  
 Odonata;Coenagrionidae;Ischnura;Ischnura elegans;Albania;GenBank;NA;MW208397  
 Odonata;Coenagrionidae;Ischnura;Ischnura elegans;Austria;GenBank;NA;MW208398  
 Odonata;Coenagrionidae;Ischnura;Ischnura elegans;Austria;GenBank;NA;MW208399  
 Odonata;Coenagrionidae;Erythromma;Erythromma lindenii;Austria;GenBank;NA;MW208400  
 Odonata;Coenagrionidae;Enallagma;Enallagma cyathigerum;Croatia;GenBank;NA;MW208402  
 Odonata;Coenagrionidae;Enallagma;Enallagma cyathigerum;Bosnia and Herzegovina;GenBank;NA;MW208403  
 Odonata;Coenagrionidae;Enallagma;Enallagma cyathigerum;Austria;GenBank;NA;MW208404  
 Odonata;Coenagrionidae;Enallagma;Enallagma cyathigerum;Austria;GenBank;NA;MW208405  
 Odonata;Gomphidae;Gomphus;Gomphus vulgatissimus;Albania;GenBank;NA;MW208406  
 Odonata;Gomphidae;Gomphus;Gomphus vulgatissimus;Albania;GenBank;NA;MW208407  
 Odonata;Gomphidae;Gomphus;Gomphus vulgatissimus;Austria;GenBank;NA;MW208408  
 Odonata;Gomphidae;Gomphus;Gomphus vulgatissimus;Austria;GenBank;NA;MW208409  
 Odonata;Calopterygidae;Calopteryx;Calopteryx splendens;Croatia;GenBank;NA;MW208413  
 Odonata;Calopterygidae;Calopteryx;Calopteryx splendens;Austria;GenBank;NA;MW208414  
 Odonata;Calopterygidae;Calopteryx;Calopteryx splendens;Austria;GenBank;NA;MW208415  
 Odonata;Coenagrionidae;Ischnura;Ischnura elegans;Sweden;GenBank;NA;MW509062  
 Odonata;Coenagrionidae;Ischnura;Ischnura elegans;Finland;GenBank;NA;MW509063  
 Odonata;Coenagrionidae;Ischnura;Ischnura elegans;Finland;GenBank;NA;MW509064  
 Odonata;Coenagrionidae;Ischnura;Ischnura elegans;Finland;GenBank;NA;MW509065  
 Odonata;Coenagrionidae;Ischnura;Ischnura elegans;Finland;GenBank;NA;MW509066  
 Odonata;Gomphidae;Gomphus;Gomphus flavipes;Germany;GenBank;NA;MW570923  
 Odonata;Gomphidae;Gomphus;Gomphus flavipes;Germany;GenBank;NA;MW570924  
 Odonata;Gomphidae;Gomphus;Gomphus flavipes;Germany;GenBank;NA;MW570925  
 Odonata;Gomphidae;Gomphus;Gomphus vulgatissimus;Germany;GenBank;NA;MW570933  
 Odonata;Gomphidae;Gomphus;Gomphus vulgatissimus;France;GenBank;NA;MW570935  
 Odonata;Gomphidae;Ophiogomphus;Ophiogomphus cecilia;Germany;GenBank;NA;MW570947  
 Odonata;Gomphidae;Ophiogomphus;Ophiogomphus cecilia;Germany;GenBank;NA;MW570948  
 Odonata;Calopterygidae;Paragomphus;Paragomphus genei;Portugal;GenBank;NA;MW570956



Odonata;Calopterygidae;Paragomphus;Paragomphus genei;Spain;GenBank;NA;MW570957  
 Odonata;Calopterygidae;Paragomphus;Paragomphus genei;Portugal;GenBank;NA;MW570958  
 Odonata;Gomphidae;Lindenia;Lindenia tetrphylla;Turkey;GenBank;NA;MW570961  
 Odonata;Coenagrionidae;Ischnura;Ischnura elegans;Germany;Bold;GBMH03835-19;NC\_031824  
 Coleoptera;Ciidae;Cis;Cis pygmaeus;Slovakia;Bold;GBCL32888-19;EF490164  
 Coleoptera;Elateridae;Ampedus;Ampedus nigroflavus;Finland;GenBank;NA;EF589381  
 Coleoptera;Curculionidae;Crypturgus;Crypturgus hispidulus;Norway;GenBank;NA;EU011807  
 Coleoptera;Curculionidae;Crypturgus;Crypturgus pusillus;Sweden;GenBank;NA;EU011812  
 Coleoptera;Curculionidae;Crypturgus;Crypturgus pusillus;Norway;GenBank;NA;EU011813  
 Coleoptera;Curculionidae;Kyklioacalles;Kyklioacalles navieresii;France;GenBank;NA;EU286450  
 Coleoptera;Curculionidae;Echinodera;Echinodera hypocrita;Germany;GenBank;NA;EU286452  
 Coleoptera;Curculionidae;Acallorneuma;Acallorneuma doderoi;Italy;GenBank;NA;EU286457  
 Coleoptera;Curculionidae;Elliptacalles;Elliptacalles longus;Italy;GenBank;NA;EU286458  
 Coleoptera;Curculionidae;Coloracalles;Coloracalles humerosus;France;GenBank;NA;EU286460  
 Coleoptera;Curculionidae;Dichromacalles;Dichromacalles rolletii;Italy;GenBank;NA;EU286470  
 Coleoptera;Curculionidae;Echinodera;Echinodera siciliensis;Italy;GenBank;NA;EU286480  
 Coleoptera;Curculionidae;Kyklioacalles;Kyklioacalles teter;Italy;GenBank;NA;EU286484  
 Coleoptera;Curculionidae;Kyklioacalles;Kyklioacalles characivorus;Italy;GenBank;NA;EU286485  
 Coleoptera;Curculionidae;Kyklioacalles;Kyklioacalles punctaticollis  
 punctaticollis;Spain;GenBank;NA;EU286487  
 Coleoptera;Curculionidae;Kyklioacalles;Kyklioacalles punctaticollis  
 meteoricus;Spain;GenBank;NA;EU286489  
 Coleoptera;Curculionidae;Kyklioacalles;Kyklioacalles roboris;France;GenBank;NA;EU286494  
 Coleoptera;Curculionidae;Elliptacalles;Elliptacalles longus;Spain;GenBank;NA;EU286499  
 Coleoptera;Curculionidae;Elliptacalles;Elliptacalles longus;Spain;GenBank;NA;EU286501  
 Coleoptera;Curculionidae;Kyklioacalles;Kyklioacalles aubei;Slovenia;GenBank;NA;EU286502  
 Coleoptera;Curculionidae;Kyklioacalles;Kyklioacalles aubei;France;GenBank;NA;EU286503  
 Coleoptera;Curculionidae;Echinodera;Echinodera bellieri bellieri;Italy;GenBank;NA;EU286505  
 Coleoptera;Curculionidae;Acallobrates;Acallobrates denticollis;Croatia;Bold;GBCL4192-09;EU286509  
 Coleoptera;Curculionidae;Echinodera;Echinodera hypocrita;Croatia;GenBank;NA;EU286520  
 Coleoptera;Curculionidae;Cryptorhynchus;Cryptorhynchus lapathi;Germany;GenBank;NA;EU286523  
 Coleoptera;Cerambycidae;Prinobius;Prinobius myardi myardi;France;GenBank;NA;EU752053  
 Coleoptera;Cerambycidae;Prinobius;Prinobius myardi myardi;France;GenBank;NA;EU752054  
 Coleoptera;Ciidae;Cis;Cis festivus;Slovakia;Bold;GBCL32887-19;FJ904060  
 Coleoptera;Staphylinidae;Dinaraea;Dinaraea aequata;Czech Republic;GenBank;NA;GQ980935  
 Coleoptera;Cerambycidae;Tetropium;Tetropium fuscum;Germany;GenBank;NA;GU003936  
 Coleoptera;Scraptiidae;Anaspis;Anaspis frontalis;Germany;GenBank;NA;HQ954526  
 Coleoptera;Lucanidae;Platycerus;Platycerus caraboides;Germany;GenBank;NA;HQ954543  
 Coleoptera;Scarabaeidae;Calicnemis;Calicnemis latreillii;France;GenBank;NA;JF888650  
 Coleoptera;Scarabaeidae;Calicnemis;Calicnemis latreillii;France;GenBank;NA;JF888651  
 Coleoptera;Cerambycidae;Stenostola;Stenostola ferrea;Czech Republic;GenBank;NA;JQ907477  
 Coleoptera;Curculionidae;Trypophloeus;Trypophloeus alni;Russia;GenBank;NA;JX263805  
 Coleoptera;Curculionidae;Dryocoetes;Dryocoetes autographus;Russia;GenBank;NA;JX263816  
 Coleoptera;Curculionidae;Taphrorychus;Taphrorychus villifrons;Ukraine;GenBank;NA;JX263818  
 Coleoptera;Curculionidae;Hylastinus;Hylastinus fankhauseri;Austria;GenBank;NA;JX263824  
 Coleoptera;Curculionidae;Hylesinus;Hylesinus toranio;United Kingdom;GenBank;NA;JX263828  
 Coleoptera;Curculionidae;Hylastes;Hylastes brunneus;Norway;GenBank;NA;JX263831  
 Coleoptera;Curculionidae;Orthotomicus;Orthotomicus proximus;Sweden;GenBank;NA;JX263835  
 Coleoptera;Curculionidae;Polygraphus;Polygraphus poligraphus;Sweden;GenBank;NA;JX263851  
 Coleoptera;Curculionidae;Trypodendron;Trypodendron domesticum;Norway;GenBank;NA;JX263874  
 Coleoptera;Cerambycidae;Acanthocinus;Acanthocinus aedilis;Poland;GenBank;NA;KC593301  
 Coleoptera;Cerambycidae;Acanthocinus;Acanthocinus aedilis;Poland;GenBank;NA;KC593302  
 Coleoptera;Cerambycidae;Acanthocinus;Acanthocinus aedilis;Poland;GenBank;NA;KC593303  
 Coleoptera;Cerambycidae;Acanthocinus;Acanthocinus aedilis;Poland;GenBank;NA;KC593304  
 Coleoptera;Cerambycidae;Acanthocinus;Acanthocinus aedilis;Poland;GenBank;NA;KC593305  
 Coleoptera;Cerambycidae;Arhopalus;Arhopalus rusticus;Poland;GenBank;NA;KC593309  
 Coleoptera;Cerambycidae;Arhopalus;Arhopalus rusticus;Poland;GenBank;NA;KC593310  
 Coleoptera;Cerambycidae;Arhopalus;Arhopalus rusticus;Poland;GenBank;NA;KC593311  
 Coleoptera;Cerambycidae;Callidium;Callidium violaceum;Poland;GenBank;NA;KC593313  
 Coleoptera;Cerambycidae;Callidium;Callidium violaceum;Poland;GenBank;NA;KC593314  
 Coleoptera;Cerambycidae;Callidium;Callidium violaceum;Poland;GenBank;NA;KC593315  
 Coleoptera;Cerambycidae;Callidium;Callidium violaceum;Poland;GenBank;NA;KC593316  
 Coleoptera;Cerambycidae;Callidium;Callidium violaceum;Poland;GenBank;NA;KC593317  
 Coleoptera;Cerambycidae;Molorchus;Molorchus minor;Poland;GenBank;NA;KC593326  
 Coleoptera;Cerambycidae;Molorchus;Molorchus minor;Poland;GenBank;NA;KC593327  
 Coleoptera;Cerambycidae;Molorchus;Molorchus minor;Poland;GenBank;NA;KC593328  
 Coleoptera;Cerambycidae;Molorchus;Molorchus minor;Poland;GenBank;NA;KC593329  
 Coleoptera;Cerambycidae;Molorchus;Molorchus minor;Poland;GenBank;NA;KC593330  
 Coleoptera;Cerambycidae;Pyrrhidium;Pyrrhidium sanguineum;Poland;GenBank;NA;KC593336  
 Coleoptera;Cerambycidae;Pyrrhidium;Pyrrhidium sanguineum;Poland;GenBank;NA;KC593337  
 Coleoptera;Cerambycidae;Pyrrhidium;Pyrrhidium sanguineum;Poland;GenBank;NA;KC593338  
 Coleoptera;Curculionidae;Crypturgus;Crypturgus hispidulus;Russia;GenBank;NA;KC845431  
 Coleoptera;Curculionidae;Pityophthorus;Pityophthorus glabratus;Sweden;GenBank;NA;KC845435  
 Coleoptera;Curculionidae;Pityophthorus;Pityophthorus lichtensteinii;Norway;GenBank;NA;KC845436  
 Coleoptera;Curculionidae;Cryphalus;Cryphalus saltuarius;Sweden;GenBank;NA;KC845437  
 Coleoptera;Curculionidae;Cryphalus;Cryphalus saltuarius;Norway;GenBank;NA;KC845438  
 Coleoptera;Curculionidae;Ernopus;Ernopus tiliae;Denmark;GenBank;NA;KC845439  
 Coleoptera;Curculionidae;Dryocoetes;Dryocoetes hectographus;Norway;GenBank;NA;KC845446

Coleoptera;Curculionidae;Dryocoetes;Dryocoetes autographus;Hungary;GenBank;NA;KC845447  
 Coleoptera;Curculionidae;Dryocoetes;Dryocoetes autographus;Estonia;GenBank;NA;KC845450  
 Coleoptera;Curculionidae;Dryocoetes;Dryocoetes autographus;Norway;GenBank;NA;KC845451  
 Coleoptera;Curculionidae;Dryocoetes;Dryocoetes villosus;Norway;GenBank;NA;KC845460  
 Coleoptera;Curculionidae;Hylesinus;Hylesinus varius;Ukraine;GenBank;NA;KC845461  
 Coleoptera;Curculionidae;Hylesinus;Hylesinus varius;Hungary;GenBank;NA;KC845462  
 Coleoptera;Curculionidae;Hylurgops;Hylurgops palliatus;Norway;GenBank;NA;KC845463  
 Coleoptera;Curculionidae;Hylurgops;Hylurgops palliatus;Norway;GenBank;NA;KC845464  
 Coleoptera;Curculionidae;Hylastes;Hylastes cunicularius;Norway;GenBank;NA;KC845465  
 Coleoptera;Curculionidae;Hylastes;Hylastes cunicularius;Russia;GenBank;NA;KC845466  
 Coleoptera;Curculionidae;Hylastes;Hylastes opacus;Sweden;GenBank;NA;KC845468  
 Coleoptera;Curculionidae;Hylastes;Hylastes opacus;Russia;GenBank;NA;KC845471  
 Coleoptera;Curculionidae;Hylastes;Hylastes attenuatus;Sweden;GenBank;NA;KC845472  
 Coleoptera;Curculionidae;Ips;Ips typographus;Norway;GenBank;NA;KC845475  
 Coleoptera;Curculionidae;Ips;Ips typographus;Estonia;GenBank;NA;KC845476  
 Coleoptera;Curculionidae;Ips;Ips sexdentatus;Spain;GenBank;NA;KC845477  
 Coleoptera;Curculionidae;Orthotomicus;Orthotomicus proximus;Estonia;GenBank;NA;KC845478  
 Coleoptera;Curculionidae;Orthotomicus;Orthotomicus suturalis;Estonia;GenBank;NA;KC845479  
 Coleoptera;Curculionidae;Orthotomicus;Orthotomicus erosus;Spain;GenBank;NA;KC845480  
 Coleoptera;Curculionidae;Pityogenes;Pityogenes trepanatus;Sweden;GenBank;NA;KC845481  
 Coleoptera;Curculionidae;Pityogenes;Pityogenes bidentatus;Sweden;GenBank;NA;KC845482  
 Coleoptera;Curculionidae;Pityogenes;Pityogenes chalcographus;Norway;GenBank;NA;KC845483  
 Coleoptera;Curculionidae;Pityogenes;Pityogenes chalcographus;Estonia;GenBank;NA;KC845484  
 Coleoptera;Curculionidae;Polygraphus;Polygraphus grandiclavus;Czech Republic;GenBank;NA;KC845493  
 Coleoptera;Curculionidae;Polygraphus;Polygraphus grandiclavus;Italy;GenBank;NA;KC845494  
 Coleoptera;Curculionidae;Polygraphus;Polygraphus grandiclavus;Italy;GenBank;NA;KC845495  
 Coleoptera;Curculionidae;Polygraphus;Polygraphus poligraphus;Sweden;GenBank;NA;KC845496  
 Coleoptera;Curculionidae;Polygraphus;Polygraphus poligraphus;Norway;GenBank;NA;KC845497  
 Coleoptera;Curculionidae;Polygraphus;Polygraphus poligraphus;Estonia;GenBank;NA;KC845498  
 Coleoptera;Curculionidae;Polygraphus;Polygraphus poligraphus;Hungary;GenBank;NA;KC845499  
 Coleoptera;Curculionidae;Scolytus;Scolytus rugulosus;Hungary;GenBank;NA;KC845508  
 Coleoptera;Curculionidae;Scolytus;Scolytus pygmaeus;Denmark;GenBank;NA;KC845509  
 Coleoptera;Curculionidae;Scolytus;Scolytus pygmaeus;Czech Republic;GenBank;NA;KC845510  
 Coleoptera;Curculionidae;Scolytus;Scolytus multistriatus;Denmark;GenBank;NA;KC845512  
 Coleoptera;Curculionidae;Scolytus;Scolytus carpini;Czech Republic;GenBank;NA;KC845513  
 Coleoptera;Curculionidae;Scolytus;Scolytus ensifer;Czech Republic;GenBank;NA;KC845514  
 Coleoptera;Curculionidae;Tomicus;Tomicus piniperda;Estonia;GenBank;NA;KC845515  
 Coleoptera;Curculionidae;Trypodendron;Trypodendron lineatum;Norway;GenBank;NA;KC845516  
 Coleoptera;Curculionidae;Trypodendron;Trypodendron domesticum;Germany;GenBank;NA;KC845517  
 Coleoptera;Curculionidae;Trypodendron;Trypodendron signatum;Germany;GenBank;NA;KC845518  
 Coleoptera;Curculionidae;Xyleborinus;Xyleborinus saxesenii;Czech Republic;GenBank;NA;KC845519  
 Coleoptera;Curculionidae;Xyleborus;Xyleborus monographus;Germany;GenBank;NA;KC845522  
 Coleoptera;Curculionidae;Xyleborus;Xyleborus monographus;Czech Republic;GenBank;NA;KC845523  
 Coleoptera;Laemophloeidae;Cryptolestes;Cryptolestes ferrugineus;Czech Republic;GenBank;NA;KC977914  
 Coleoptera;Curculionidae;Platypus;Platypus cylindrus;Portugal;GenBank;NA;KP297972  
 Coleoptera;Curculionidae;Platypus;Platypus cylindrus;Portugal;GenBank;NA;KP297973  
 Coleoptera;Curculionidae;Platypus;Platypus cylindrus;Portugal;GenBank;NA;KP297974  
 Coleoptera;Cerambycidae;Trichoferus;Trichoferus holosericeus;France;GenBank;NA;KU531396  
 Coleoptera;Cerambycidae;Rosalia;Rosalia alpina;Italy;GenBank;NA;KX241486  
 Coleoptera;Lucanidae;Lucanus;Lucanus cervus;Italy;GenBank;NA;KX241489  
 Coleoptera;Elateridae;Melanotus;Melanotus castanipes;Poland;GenBank;NA;KY040259  
 Coleoptera;Elateridae;Melanotus;Melanotus castanipes;Poland;GenBank;NA;KY040260  
 Coleoptera;Elateridae;Melanotus;Melanotus villosus;Poland;GenBank;NA;KY040261  
 Coleoptera;Elateridae;Melanotus;Melanotus villosus;Poland;GenBank;NA;KY040262  
 Coleoptera;Elateridae;Melanotus;Melanotus villosus;Poland;GenBank;NA;KY040263  
 Coleoptera;Elateridae;Melanotus;Melanotus villosus;Poland;GenBank;NA;KY040264  
 Coleoptera;Buprestidae;Meliboeus;Meliboeus fulgidicollis;Slovakia;Bold;GBCL28309-19;MF286145  
 Coleoptera;Buprestidae;Agrilus;Agrilus roscidus;Slovakia;GenBank;NA;MF286229  
 Coleoptera;Buprestidae;Agrilus;Agrilus salicis;Slovakia;GenBank;NA;MF286232  
 Coleoptera;Buprestidae;Agrilus;Agrilus viridis viridis;Slovakia;GenBank;NA;MF286233  
 Coleoptera;Buprestidae;Agrilus;Agrilus viridis viridis;Slovakia;GenBank;NA;MF286234  
 Coleoptera;Buprestidae;Agrilus;Agrilus viridis viridis;Slovakia;GenBank;NA;MF286235  
 Coleoptera;Buprestidae;Agrilus;Agrilus viridis viridis;Slovakia;GenBank;NA;MF286236  
 Coleoptera;Buprestidae;Agrilus;Agrilus viridis viridis;Slovakia;GenBank;NA;MF286237  
 Coleoptera;Buprestidae;Agrilus;Agrilus viridis viridis;Slovakia;GenBank;NA;MF286238  
 Coleoptera;Buprestidae;Agrilus;Agrilus auricollis auricollis;Hungary;GenBank;NA;MF286242  
 Coleoptera;Buprestidae;Agrilus;Agrilus auricollis auricollis;Hungary;GenBank;NA;MF286243  
 Coleoptera;Buprestidae;Agrilus;Agrilus auricollis auricollis;Hungary;GenBank;NA;MF286244  
 Coleoptera;Buprestidae;Agrilus;Agrilus salicis;Slovakia;GenBank;NA;MF286253  
 Coleoptera;Buprestidae;Agrilus;Agrilus viridis viridis;Hungary;GenBank;NA;MF286256  
 Coleoptera;Buprestidae;Agrilus;Agrilus viridis viridis;Slovakia;GenBank;NA;MF286257  
 Coleoptera;Buprestidae;Agrilus;Agrilus viridis viridis;Slovakia;GenBank;NA;MF286258  
 Coleoptera;Buprestidae;Agrilus;Agrilus viridis viridis;Slovakia;GenBank;NA;MF286259  
 Coleoptera;Buprestidae;Agrilus;Agrilus viridis viridis;Slovakia;GenBank;NA;MF286260  
 Coleoptera;Buprestidae;Agrilus;Agrilus viridis viridis;Slovakia;GenBank;NA;MF286261  
 Coleoptera;Buprestidae;Agrilus;Agrilus viridis viridis;Slovakia;GenBank;NA;MF286262  
 Coleoptera;Buprestidae;Agrilus;Agrilus antiquus croaticus;Slovakia;GenBank;NA;MF286267

Coleoptera;Buprestidae;Agrilus;Agrilus antiquus croaticus;Slovakia;GenBank;NA;MF286268  
 Coleoptera;Buprestidae;Agrilus;Agrilus angustulus angustulus;Slovakia;GenBank;NA;MF286273  
 Coleoptera;Buprestidae;Agrilus;Agrilus angustulus angustulus;Slovakia;GenBank;NA;MF286274  
 Coleoptera;Buprestidae;Agrilus;Agrilus angustulus angustulus;Slovakia;GenBank;NA;MF286275  
 Coleoptera;Buprestidae;Agrilus;Agrilus angustulus angustulus;Slovakia;GenBank;NA;MF286276  
 Coleoptera;Buprestidae;Agrilus;Agrilus derasofasciatus;Slovakia;GenBank;NA;MF286277  
 Coleoptera;Buprestidae;Agrilus;Agrilus derasofasciatus;Slovakia;GenBank;NA;MF286278  
 Coleoptera;Buprestidae;Agrilus;Agrilus graminis graminis;Slovakia;GenBank;NA;MF286279  
 Coleoptera;Buprestidae;Agrilus;Agrilus graminis graminis;Slovakia;GenBank;NA;MF286280  
 Coleoptera;Buprestidae;Agrilus;Agrilus hastulifer hastulifer;Slovakia;GenBank;NA;MF286281  
 Coleoptera;Buprestidae;Agrilus;Agrilus hastulifer hastulifer;Slovakia;GenBank;NA;MF286282  
 Coleoptera;Buprestidae;Agrilus;Agrilus laticornis;Slovakia;GenBank;NA;MF286283  
 Coleoptera;Buprestidae;Agrilus;Agrilus obscuricollis;Slovakia;GenBank;NA;MF286284  
 Coleoptera;Buprestidae;Agrilus;Agrilus obscuricollis;Slovakia;GenBank;NA;MF286285  
 Coleoptera;Buprestidae;Agrilus;Agrilus obscuricollis;Slovakia;GenBank;NA;MF286286  
 Coleoptera;Buprestidae;Agrilus;Agrilus olivicolor;Slovakia;GenBank;NA;MF286287  
 Coleoptera;Buprestidae;Agrilus;Agrilus sulcicollis sulcicollis;Slovakia;GenBank;NA;MF286288  
 Coleoptera;Buprestidae;Agrilus;Agrilus biguttatus;Slovakia;GenBank;NA;MF286289  
 Coleoptera;Buprestidae;Agrilus;Agrilus biguttatus;Slovakia;GenBank;NA;MF286290  
 Coleoptera;Buprestidae;Agrilus;Agrilus guerini;Slovakia;GenBank;NA;MF286291  
 Coleoptera;Buprestidae;Agrilus;Agrilus pratensis pratensis;Slovakia;GenBank;NA;MF286294  
 Coleoptera;Buprestidae;Agrilus;Agrilus pratensis pratensis;Slovakia;GenBank;NA;MF286295  
 Coleoptera;Buprestidae;Agrilus;Agrilus convexicollis;Slovakia;GenBank;NA;MF286296  
 Coleoptera;Buprestidae;Agrilus;Agrilus convexicollis;Slovakia;GenBank;NA;MF286297  
 Coleoptera;Buprestidae;Agrilus;Agrilus convexicollis;Slovakia;GenBank;NA;MF286298  
 Coleoptera;Buprestidae;Agrilus;Agrilus convexicollis;Slovakia;GenBank;NA;MF286299  
 Coleoptera;Buprestidae;Agrilus;Agrilus cyanescens;Slovakia;GenBank;NA;MF286300  
 Coleoptera;Buprestidae;Agrilus;Agrilus cyanescens;Slovakia;GenBank;NA;MF286301  
 Coleoptera;Buprestidae;Agrilus;Agrilus cyanescens;Slovakia;GenBank;NA;MF286302  
 Coleoptera;Buprestidae;Meliboeus;Meliboeus fulgidicollis;Slovakia;Bold;GBCL28310-19;MF286310  
 Coleoptera;Buprestidae;Agrilus;Agrilus elegans;Spain;GenBank;NA;MF286312  
 Coleoptera;Buprestidae;Agrilus;Agrilus viridis viridis;Slovakia;GenBank;NA;MF286316  
 Coleoptera;Buprestidae;Agrilus;Agrilus suvorovi;Slovakia;GenBank;NA;MF286318  
 Coleoptera;Buprestidae;Agrilus;Agrilus suvorovi;Slovakia;GenBank;NA;MF286319  
 Coleoptera;Buprestidae;Agrilus;Agrilus viridis viridis;Slovakia;GenBank;NA;MF286320  
 Coleoptera;Buprestidae;Agrilus;Agrilus viridis viridis;Slovakia;GenBank;NA;MF286321  
 Coleoptera;Buprestidae;Agrilus;Agrilus sulcicollis sulcicollis;Slovakia;GenBank;NA;MF286324  
 Coleoptera;Buprestidae;Agrilus;Agrilus sulcicollis sulcicollis;Slovakia;GenBank;NA;MF286325  
 Coleoptera;Buprestidae;Agrilus;Agrilus viridis viridis;Slovakia;GenBank;NA;MF286326  
 Coleoptera;Buprestidae;Agrilus;Agrilus biguttatus;Slovakia;GenBank;NA;MF286328  
 Coleoptera;Buprestidae;Agrilus;Agrilus biguttatus;Slovakia;GenBank;NA;MF286329  
 Coleoptera;Buprestidae;Agrilus;Agrilus viridis viridis;Czech Republic;GenBank;NA;MF286330  
 Coleoptera;Buprestidae;Agrilus;Agrilus viridis viridis;Czech Republic;GenBank;NA;MF286331  
 Coleoptera;Curculionidae;Trypodendron;Trypodendron lineatum;Slovenia;GenBank;NA;MF373743  
 Coleoptera;Buprestidae;Agrilus;Agrilus viridis;Italy;GenBank;NA;MF543033  
 Coleoptera;Buprestidae;Agrilus;Agrilus viridis;Italy;GenBank;NA;MF543034  
 Coleoptera;Buprestidae;Agrilus;Agrilus viridis;Italy;GenBank;NA;MF543035  
 Coleoptera;Buprestidae;Agrilus;Agrilus viridis;Italy;GenBank;NA;MF543036  
 Coleoptera;Buprestidae;Agrilus;Agrilus viridis;Italy;GenBank;NA;MF543037  
 Coleoptera;Curculionidae;Xyleborus;Xyleborus monographus;Portugal;GenBank;NA;MF611985  
 Coleoptera;Curculionidae;Xyleborus;Xyleborus monographus;Portugal;GenBank;NA;MF611986  
 Coleoptera;Curculionidae;Xyleborus;Xyleborus monographus;Portugal;GenBank;NA;MF611987  
 Coleoptera;Curculionidae;Xyleborus;Xyleborus monographus;Portugal;GenBank;NA;MF611988  
 Coleoptera;Curculionidae;Xyleborus;Xyleborus monographus;Portugal;GenBank;NA;MF611989  
 Coleoptera;Curculionidae;Xyleborus;Xyleborus monographus;Portugal;GenBank;NA;MF611990  
 Coleoptera;Curculionidae;Xyleborus;Xyleborus monographus;Portugal;GenBank;NA;MF611991  
 Coleoptera;Curculionidae;Xyleborus;Xyleborus monographus;Portugal;GenBank;NA;MF611992  
 Coleoptera;Curculionidae;Xyleborus;Xyleborus monographus;Portugal;GenBank;NA;MF611993  
 Coleoptera;Curculionidae;Xyleborinus;Xyleborinus saxesenii;Portugal;GenBank;NA;MF611994  
 Coleoptera;Curculionidae;Xyleborinus;Xyleborinus saxesenii;Portugal;GenBank;NA;MF611995  
 Coleoptera;Curculionidae;Xyleborinus;Xyleborinus saxesenii;Portugal;GenBank;NA;MF611996  
 Coleoptera;Curculionidae;Xyleborinus;Xyleborinus saxesenii;Portugal;GenBank;NA;MF611997  
 Coleoptera;Curculionidae;Xyleborinus;Xyleborinus saxesenii;Portugal;GenBank;NA;MF611998  
 Coleoptera;Curculionidae;Xyleborus;Xyleborus dryographus;Portugal;GenBank;NA;MF611999  
 Coleoptera;Curculionidae;Xyleborus;Xyleborus dryographus;Portugal;GenBank;NA;MF612000  
 Coleoptera;Curculionidae;Xyleborus;Xyleborus dryographus;Portugal;GenBank;NA;MF612001  
 Coleoptera;Curculionidae;Xyleborus;Xyleborus dryographus;Portugal;GenBank;NA;MF612002  
 Coleoptera;Scarabaeidae;Cetonia;Cetonia aurata;Russia;GenBank;NA;MF706407  
 Coleoptera;Scarabaeidae;Cetonia;Cetonia aurata;Russia;GenBank;NA;MF706408  
 Coleoptera;Lucanidae;Dorcus;Dorcus parallelipedus;Russia;GenBank;NA;MF706411  
 Coleoptera;Buprestidae;Chalcophora;Chalcophora mariana;Russia;GenBank;NA;MF706412  
 Coleoptera;Scarabaeidae;Oryctes;Oryctes nasicornis;Russia;GenBank;NA;MF706415  
 Coleoptera;Cerambycidae;Spondylis;Spondylis buprestoides;Russia;GenBank;NA;MF706420  
 Coleoptera;Lycidae;Lygistopterus;Lygistopterus sanguineus;Russia;GenBank;NA;MF706421  
 Coleoptera;Cerambycidae;Prionus;Prionus coriarius;Russia;GenBank;NA;MF706433  
 Coleoptera;Cerambycidae;Stenurella;Stenurella bifasciata;Russia;GenBank;NA;MF706444  
 Coleoptera;Scarabaeidae;Trichius;Trichius fasciatus;Russia;GenBank;NA;MF706446  
 Coleoptera;Lucanidae;Lucanus;Lucanus cervus;Russia;GenBank;NA;MF706447

Coleoptera;Scraptiidae;Anaspis;Anaspis frontalis;Poland;GenBank;NA;MH020275  
 Coleoptera;Scraptiidae;Anaspis;Anaspis frontalis;Poland;GenBank;NA;MH020276  
 Coleoptera;Scraptiidae;Anaspis;Anaspis frontalis;Poland;GenBank;NA;MH020277  
 Coleoptera;Melandryidae;Serropalpus;Serropalpus barbatus;Poland;GenBank;NA;MH020281  
 Coleoptera;Cerambycidae;Prionus;Prionus coriarius;Poland;GenBank;NA;MH020282  
 Coleoptera;Cerambycidae;Prionus;Prionus coriarius;Poland;GenBank;NA;MH020283  
 Coleoptera;Cerambycidae;Pachyta;Pachyta quadrimaculata;Poland;GenBank;NA;MH020284  
 Coleoptera;Cerambycidae;Pachyta;Pachyta quadrimaculata;Poland;GenBank;NA;MH020285  
 Coleoptera;Cleridae;Clerus;Clerus mutillarius;Poland;GenBank;NA;MH020286  
 Coleoptera;Cleridae;Clerus;Clerus mutillarius;Poland;GenBank;NA;MH020287  
 Coleoptera;Cleridae;Thanasimus;Thanasimus formicarius;Austria;GenBank;NA;MH020288  
 Coleoptera;Cleridae;Thanasimus;Thanasimus formicarius;Poland;GenBank;NA;MH020289  
 Coleoptera;Cleridae;Thanasimus;Thanasimus formicarius;Poland;GenBank;NA;MH020290  
 Coleoptera;Cerambycidae;Pidonia;Pidonia lurida;Poland;GenBank;NA;MH020291  
 Coleoptera;Cerambycidae;Pidonia;Pidonia lurida;Poland;GenBank;NA;MH020292  
 Coleoptera;Cerambycidae;Pidonia;Pidonia lurida;Poland;GenBank;NA;MH020293  
 Coleoptera;Mycetophagidae;Mycetophagus;Mycetophagus multipunctatus;Poland;GenBank;NA;MH020296  
 Coleoptera;Mycetophagidae;Mycetophagus;Mycetophagus quadripustulatus;Poland;GenBank;NA;MH020298  
 Coleoptera;Mycetophagidae;Mycetophagus;Mycetophagus quadripustulatus;Poland;GenBank;NA;MH020299  
 Coleoptera;Mycetophagidae;Mycetophagus;Mycetophagus quadripustulatus;Poland;GenBank;NA;MH020300  
 Coleoptera;Mycetophagidae;Mycetophagus;Mycetophagus piceus;Poland;GenBank;NA;MH020301  
 Coleoptera;Zopheridae;Bitoma;Bitoma crenata;Poland;GenBank;NA;MH020302  
 Coleoptera;Zopheridae;Bitoma;Bitoma crenata;Poland;GenBank;NA;MH020303  
 Coleoptera;Cerambycidae;Rhagium;Rhagium sycophanta;Austria;GenBank;NA;MH020317  
 Coleoptera;Cerambycidae;Rhagium;Rhagium sycophanta;Poland;GenBank;NA;MH020318  
 Coleoptera;Cerambycidae;Rhagium;Rhagium inquisitor;Poland;GenBank;NA;MH020319  
 Coleoptera;Cerambycidae;Rhagium;Rhagium inquisitor;Poland;GenBank;NA;MH020320  
 Coleoptera;Cerambycidae;Rhagium;Rhagium mordax;Poland;GenBank;NA;MH020321  
 Coleoptera;Melyridae;Dasytes;Dasytes plumbeus;Poland;GenBank;NA;MH020322  
 Coleoptera;Melyridae;Dasytes;Dasytes plumbeus;Poland;GenBank;NA;MH020323  
 Coleoptera;Cerambycidae;Strangalia;Strangalia attenuata;Poland;GenBank;NA;MH020328  
 Coleoptera;Cerambycidae;Strangalia;Strangalia attenuata;Poland;GenBank;NA;MH020329  
 Coleoptera;Cerambycidae;Oxymirus;Oxymirus cursor;Poland;GenBank;NA;MH020332  
 Coleoptera;Oedemeridae;Chrysanthia;Chrysanthia geniculata;Poland;GenBank;NA;MH020339  
 Coleoptera;Oedemeridae;Chrysanthia;Chrysanthia geniculata;Poland;GenBank;NA;MH020340  
 Coleoptera;Oedemeridae;Chrysanthia;Chrysanthia geniculata;Poland;GenBank;NA;MH020341  
 Coleoptera;Cerambycidae;Rutpela;Rutpela maculata;Poland;GenBank;NA;MH020342  
 Coleoptera;Cerambycidae;Rutpela;Rutpela maculata;Poland;GenBank;NA;MH020343  
 Coleoptera;Cerambycidae;Stenurella;Stenurella nigra;Poland;GenBank;NA;MH020344  
 Coleoptera;Cerambycidae;Anoplodera;Anoplodera sexguttata;Poland;GenBank;NA;MH020345  
 Coleoptera;Cerambycidae;Anoplodera;Anoplodera sexguttata;Poland;GenBank;NA;MH020346  
 Coleoptera;Cerambycidae;Anastrangalia;Anastrangalia reyi;Poland;GenBank;NA;MH020347  
 Coleoptera;Cerambycidae;Anastrangalia;Anastrangalia reyi;Poland;GenBank;NA;MH020348  
 Coleoptera;Cerambycidae;Anastrangalia;Anastrangalia sanguinolenta;Poland;GenBank;NA;MH020349  
 Coleoptera;Cerambycidae;Anastrangalia;Anastrangalia sanguinolenta;Poland;GenBank;NA;MH020350  
 Coleoptera;Cerambycidae;Allosterna;Allosterna tabacicolor;Poland;GenBank;NA;MH020351  
 Coleoptera;Cerambycidae;Allosterna;Allosterna tabacicolor;Poland;GenBank;NA;MH020352  
 Coleoptera;Pyrochroidae;Pyrochroa;Pyrochroa coccinea;Poland;GenBank;NA;MH020353  
 Coleoptera;Pyrochroidae;Pyrochroa;Pyrochroa coccinea;Poland;GenBank;NA;MH020354  
 Coleoptera;Pyrochroidae;Pyrochroa;Pyrochroa coccinea;Poland;GenBank;NA;MH020355  
 Coleoptera;Pyrochroidae;Pyrochroa;Pyrochroa coccinea;Poland;GenBank;NA;MH020356  
 Coleoptera;Pyrochroidae;Schizotus;Schizotus pectinicornis;Poland;GenBank;NA;MH020357  
 Coleoptera;Pyrochroidae;Schizotus;Schizotus pectinicornis;Poland;GenBank;NA;MH020358  
 Coleoptera;Pyrochroidae;Schizotus;Schizotus pectinicornis;Poland;GenBank;NA;MH020359  
 Coleoptera;Pyrochroidae;Schizotus;Schizotus pectinicornis;Poland;GenBank;NA;MH020360  
 Coleoptera;Cerambycidae;Arhopalus;Arhopalus rusticus;Poland;GenBank;NA;MH020361  
 Coleoptera;Cerambycidae;Arhopalus;Arhopalus rusticus;Poland;GenBank;NA;MH020362  
 Coleoptera;Mycetophagidae;Litargus;Litargus connexus;Poland;GenBank;NA;MH020363  
 Coleoptera;Scarabaeidae;Valgus;Valgus hemipterus;Bulgaria;GenBank;NA;MH020440  
 Coleoptera;Scarabaeidae;Valgus;Valgus hemipterus;Bulgaria;GenBank;NA;MH020441  
 Coleoptera;Scarabaeidae;Cetonia;Cetonia aurata;Poland;GenBank;NA;MH020442  
 Coleoptera;Pythidae;Pytho;Pytho depressus;Poland;GenBank;NA;MH020446  
 Coleoptera;Pythidae;Pytho;Pytho depressus;Poland;GenBank;NA;MH020447  
 Coleoptera;Cerambycidae;Pseudovadonia;Pseudovadonia livida;Poland;GenBank;NA;MH020448  
 Coleoptera;Tenebrionidae;Diaperis;Diaperis boleti;Poland;GenBank;NA;MH020449  
 Coleoptera;Sphindidae;Sphindus;Sphindus dubius;Poland;GenBank;NA;MH020450  
 Coleoptera;Sphindidae;Sphindus;Sphindus dubius;Poland;GenBank;NA;MH020451  
 Coleoptera;Cerambycidae;Rusticoclytus;Rusticoclytus rusticus;Poland;GenBank;NA;MH020452  
 Coleoptera;Cerambycidae;Rusticoclytus;Rusticoclytus rusticus;Poland;GenBank;NA;MH020454  
 Coleoptera;Cerambycidae;Hylotrupes;Hylotrupes bajulus;Poland;GenBank;NA;MH020455  
 Coleoptera;Cerambycidae;Hylotrupes;Hylotrupes bajulus;Poland;GenBank;NA;MH020456  
 Coleoptera;Cerambycidae;Stenurella;Stenurella melanura;Poland;GenBank;NA;MH020457  
 Coleoptera;Cerambycidae;Stenurella;Stenurella melanura;Poland;GenBank;NA;MH020458  
 Coleoptera;Cerambycidae;Stenurella;Stenurella melanura;Poland;GenBank;NA;MH020459  
 Coleoptera;Salpingidae;Salpingus;Salpingus ruficollis;Poland;GenBank;NA;MH020475  
 Coleoptera;Cerambycidae;Aromia;Aromia moschata;Poland;GenBank;NA;MH020476  
 Coleoptera;Cerambycidae;Aromia;Aromia moschata;Poland;GenBank;NA;MH020477  
 Coleoptera;Cerambycidae;Aromia;Aromia moschata;Poland;GenBank;NA;MH020478

Coleoptera;Cerambycidae;Phymatodes;Phymatodes testaceus;Poland;GenBank;NA;MH020479  
 Coleoptera;Cerambycidae;Phymatodes;Phymatodes testaceus;Poland;GenBank;NA;MH020480  
 Coleoptera;Erotylidae;Dacne;Dacne bipustulata;Poland;GenBank;NA;MH020481  
 Coleoptera;Erotylidae;Dacne;Dacne rufifrons;Bulgaria;GenBank;NA;MH020482  
 Coleoptera;Erotylidae;Dacne;Dacne rufifrons;Bulgaria;GenBank;NA;MH020483  
 Coleoptera;Erotylidae;Dacne;Dacne rufifrons;Bulgaria;GenBank;NA;MH020484  
 Coleoptera;Cerambycidae;Paracorymbia;Paracorymbia maculicornis;Poland;GenBank;NA;MH020520  
 Coleoptera;Cerambycidae;Paracorymbia;Paracorymbia maculicornis;Poland;GenBank;NA;MH020521  
 Coleoptera;Curculionidae;Hylobius;Hylobius abietis;Bulgaria;GenBank;NA;MH115471  
 Coleoptera;Curculionidae;Ips;Ips typographus;Poland;GenBank;NA;MH115481  
 Coleoptera;Cerambycidae;Dinoptera;Dinoptera collaris;Poland;GenBank;NA;MH115482  
 Coleoptera;Curculionidae;Dryocoetes;Dryocoetes autographus;Poland;GenBank;NA;MH115483  
 Coleoptera;Curculionidae;Dryocoetes;Dryocoetes autographus;Poland;GenBank;NA;MH115484  
 Coleoptera;Curculionidae;Pityogenes;Pityogenes chalcographus;Slovakia;GenBank;NA;MH115485  
 Coleoptera;Erotylidae;Triplax;Triplax russica;Poland;GenBank;NA;MH115489  
 Coleoptera;Erotylidae;Triplax;Triplax aenea;Slovakia;GenBank;NA;MH115490  
 Coleoptera;Erotylidae;Combocerus;Combocerus glaber;Bulgaria;GenBank;NA;MH115491  
 Coleoptera;Erotylidae;Tritoma;Tritoma bipustulata;Poland;GenBank;NA;MH115492  
 Coleoptera;Erotylidae;Tritoma;Tritoma bipustulata;Poland;GenBank;NA;MH115493  
 Coleoptera;Buprestidae;Agrilus;Agrilus derasofasciatus;Poland;GenBank;NA;MH115496  
 Coleoptera;Cerambycidae;Spondylis;Spondylis buprestoides;Poland;GenBank;NA;MH115501  
 Coleoptera;Lycidae;Lygistopterus;Lygistopterus sanguineus;Poland;GenBank;NA;MH115527  
 Coleoptera;Lycidae;Lygistopterus;Lygistopterus sanguineus;Poland;GenBank;NA;MH115528  
 Coleoptera;Lucanidae;Dorcus;Dorcus parallelipipedus;Poland;GenBank;NA;MH115537  
 Coleoptera;Lucanidae;Dorcus;Dorcus parallelipipedus;Poland;GenBank;NA;MH115538  
 Coleoptera;Cerambycidae;Plagionotus;Plagionotus detritus;Poland;GenBank;NA;MH115547  
 Coleoptera;Buprestidae;Agrilus;Agrilus suvorovi;Poland;GenBank;NA;MH115551  
 Coleoptera;Salpingidae;Salpingus;Salpingus ruficollis;Poland;GenBank;NA;MH115559  
 Coleoptera;Buprestidae;Anthaxia;Anthaxia nitidula;Poland;GenBank;NA;MH115561  
 Coleoptera;Cerambycidae;Tetropium;Tetropium fuscum;Poland;GenBank;NA;MH115562  
 Coleoptera;Cerambycidae;Tetropium;Tetropium fuscum;Poland;GenBank;NA;MH115563  
 Coleoptera;Buprestidae;Bostrichus;Bostrichus capucinus;Austria;GenBank;NA;MH115570  
 Coleoptera;Cerambycidae;Dinoptera;Dinoptera collaris;Poland;GenBank;NA;MH115573  
 Coleoptera;Curculionidae;Trypodendron;Trypodendron lineatum;Poland;GenBank;NA;MH115574  
 Coleoptera;Cerambycidae;Obrium;Obrium brunneum;Poland;GenBank;NA;MH115575  
 Coleoptera;Curculionidae;Platypus;Platypus cylindrus;Czech Republic;GenBank;NA;MW000661  
 Coleoptera;Ptinidae;Dryophilus;Dryophilus pusillus;Slovakia;GenBank;NA;MW441347  
 Coleoptera;Ptinidae;Ernobius;Ernobius pini;Switzerland;GenBank;NA;MW441351  
 Coleoptera;Ripiphoridae;Pelecotoma;Pelecotoma fennica;Finland;GenBank;NA;MZ632802  
 Coleoptera;Curculionidae;Hylastes;Hylastes brunneus;United Kingdom;Bold;GBCL53656-19;NC\_036262  
 Coleoptera;Monotomidae;Monotoma;Monotoma quadricollis;United Kingdom;Bold;GBCL43113-19;NC\_036266  
 Coleoptera;Silvanidae;Silvanus;Silvanus bidentatus;United Kingdom;Bold;GBCL44994-19;NC\_036273  
 Coleoptera;Salpingidae;Vincenzellus;Vincenzellus ruficollis;United Kingdom;Bold;GBCL44391-19;NC\_036274  
 Coleoptera;Tetratomidae;Tetratoma;Tetratoma fungorum;United Kingdom;Bold;GBCL45028-19;NC\_036276  
 Coleoptera;Ripiphoridae;Pelecotoma;Pelecotoma fennica;Czech Republic;Bold;GBCL44346-19;NC\_036277  
 Coleoptera;Curculionidae;Ips;Ips sexdentatus;United Kingdom;Bold;GBCL53707-19;NC\_036281  
 Coleoptera;Curculionidae;Dryocoetes;Dryocoetes villosus;United Kingdom;Bold;GBCL53527-19;NC\_036282  
 Coleoptera;Curculionidae;Trypodendron;Trypodendron domesticum;United Kingdom;Bold;GBCL54041-19;NC\_036286  
 Coleoptera;Curculionidae;Dryocoetes;Dryocoetes autographus;United Kingdom;Bold;GBCL53526-19;NC\_036287  
 Coleoptera;Curculionidae;Pityophthorus;Pityophthorus pubescens;United Kingdom;Bold;GBCL53888-19;NC\_036288  
 Coleoptera;Curculionidae;Pityogenes;Pityogenes bidentatus;United Kingdom;Bold;GBCL53883-19;NC\_036289  
 Coleoptera;Curculionidae;Hylastes;Hylastes attenuatus;United Kingdom;Bold;GBCL53655-19;NC\_036290  
 Coleoptera;Curculionidae;Orthotomicus;Orthotomicus laricis;United Kingdom;Bold;GBCL53823-19;NC\_036291  
 Coleoptera;Curculionidae;Trypodendron;Trypodendron signatum;United Kingdom;Bold;GBCL54048-19;NC\_036292  
 Coleoptera;Curculionidae;Anisandrus;Anisandrus dispar;United Kingdom;Bold;GBCL53332-19;NC\_036293  
 Coleoptera;Curculionidae;Gnathotrichus;Gnathotrichus materiarius;United Kingdom;Bold;GBCL53586-19;NC\_036294  
 Coleoptera;Elateridae;Ampedus;Ampedus nemoralis;France;Bold;PSFOR527-13;NA  
 Coleoptera;Elateridae;Ampedus;Ampedus scrofa;France;Bold;PSFOR523-13;NA  
 Coleoptera;Buprestidae;Anthaxia;Anthaxia hungarica;Greece;Bold;JSBIC178-18;NA  
 Coleoptera;Curculionidae;Dryocoetes;Dryocoetes villosus;Norway;Bold;NOCLP1785-19;NA  
 Coleoptera;Cerambycidae;Ergates;Ergates faber;France;Bold;SICOC487-18;NA  
 Coleoptera;Cerambycidae;Prinobius;Prinobius myardi;Greece;Bold;CERAF133-08;NA  
 Coleoptera;Cerambycidae;Prinobius;Prinobius myardi;Macedonia;Bold;CERAF088-07;NA  
 Coleoptera;Cerambycidae;Prinobius;Prinobius myardi;Greece;Bold;CERAF132-08;NA  
 Coleoptera;Cerambycidae;Prinobius;Prinobius myardi;Macedonia;Bold;CERAF087-07;NA  
 ;;;;

# Appendix\_3\_Data\_without\_Sequences;;;;;

order\_name;family\_name;genus\_name;species\_name;country;sourceDatabase;processid;genbank\_accession

Hymenoptera;Andrenidae;Andrena;Andrena argentata;Germany;Bold;GBACU1079-12;-  
Hymenoptera;Andrenidae;Andrena;Andrena argentata;Germany;Bold;GBACU3075-13;-  
Hymenoptera;Andrenidae;Andrena;Andrena argentata;Germany;Bold;FBHAP872-09;-  
Hymenoptera;Andrenidae;Andrena;Andrena argentata;Germany;Bold;GBACU343-12;-  
Hymenoptera;Andrenidae;Andrena;Andrena argentata;Germany;Bold;GBACU1078-12;-  
Hymenoptera;Andrenidae;Andrena;Andrena argentata;Germany;Bold;FBAPC679-11;-  
Hymenoptera;Andrenidae;Andrena;Andrena argentata;Germany;Bold;GBACU1076-12;-  
Hymenoptera;Andrenidae;Andrena;Andrena argentata;Czech Republic;Bold;GBACU1349-12;-  
Hymenoptera;Andrenidae;Andrena;Andrena argentata;Norway;Bold;NOBEE013-09;-  
Hymenoptera;Andrenidae;Andrena;Andrena argentata;Germany;Bold;GBACU1075-12;-  
Hymenoptera;Andrenidae;Andrena;Andrena argentata;Germany;Bold;GBACU1077-12;-  
Hymenoptera;Andrenidae;Andrena;Andrena argentata;Norway;Bold;NOBEE012-09;-  
Hymenoptera;Andrenidae;Andrena;Andrena curvana;Germany;Bold;BCHYM2470-14;-  
Hymenoptera;Andrenidae;Andrena;Andrena hattorfiana;Germany;Bold;FBAPC039-10;-  
Hymenoptera;Andrenidae;Andrena;Andrena hattorfiana;Germany;Bold;FBHAP958-09;-  
Hymenoptera;Andrenidae;Andrena;Andrena hattorfiana;Germany;Bold;FBAPC037-10;-  
Hymenoptera;Andrenidae;Andrena;Andrena hattorfiana;Italy;Bold;GBLGC043-12;-  
Hymenoptera;Andrenidae;Andrena;Andrena hattorfiana;Germany;Bold;FBHAP956-09;-  
Hymenoptera;Andrenidae;Andrena;Andrena ovatula;Spain;Bold;HYMAA313-22;-  
Hymenoptera;Andrenidae;Andrena;Andrena ovatula;Germany;Bold;GBACU2347-13;-  
Hymenoptera;Andrenidae;Andrena;Andrena ovatula;Germany;Bold;GBACU2388-13;-  
Hymenoptera;Andrenidae;Andrena;Andrena ovatula;Belgium;Bold;HYMAA316-22;-  
Hymenoptera;Andrenidae;Andrena;Andrena ovatula;Germany;Bold;FBHAP546-09;-  
Hymenoptera;Andrenidae;Andrena;Andrena ovatula;Germany;Bold;GBACU2386-13;-  
Hymenoptera;Andrenidae;Andrena;Andrena ovatula;Portugal;Bold;HYMAA314-22;-  
Hymenoptera;Andrenidae;Andrena;Andrena ovatula;Germany;Bold;FBAPD257-11;-  
Hymenoptera;Andrenidae;Andrena;Andrena ovatula;Germany;Bold;FBAPD255-11;-  
Hymenoptera;Andrenidae;Andrena;Andrena ovatula;Germany;Bold;FBAPD233-11;-  
Hymenoptera;Andrenidae;Andrena;Andrena ovatula;Austria;Bold;TDAAT343-19;-  
Hymenoptera;Andrenidae;Andrena;Andrena ovatula;Germany;Bold;FBAPD254-11;-  
Hymenoptera;Andrenidae;Andrena;Andrena ovatula;Germany;Bold;GBACU2298-13;-  
Hymenoptera;Andrenidae;Andrena;Andrena ovatula;Germany;Bold;GBACU2341-13;-  
Hymenoptera;Andrenidae;Andrena;Andrena ovatula;Germany;Bold;FBAPD256-11;-  
Hymenoptera;Andrenidae;Andrena;Andrena ovatula;Germany;Bold;FBAPC074-10;-  
Hymenoptera;Andrenidae;Andrena;Andrena ovatula;Germany;Bold;FBAPD259-11;-  
Hymenoptera;Andrenidae;Andrena;Andrena ovatula;Germany;Bold;GBACU2387-13;-  
Hymenoptera;Andrenidae;Andrena;Andrena ovatula;Germany;Bold;FBHAP545-09;-  
Hymenoptera;Andrenidae;Andrena;Andrena ovatula;Germany;Bold;FBAPC073-10;-  
Hymenoptera;Andrenidae;Andrena;Andrena ovatula;Germany;Bold;BCHYM4595-14;-  
Hymenoptera;Andrenidae;Andrena;Andrena ovatula;Germany;Bold;GBACU2390-13;-  
Hymenoptera;Andrenidae;Andrena;Andrena ovatula;Germany;Bold;FBAPD260-11;-  
Hymenoptera;Andrenidae;Andrena;Andrena ovatula;Germany;Bold;FBAPD258-11;-  
Hymenoptera;Andrenidae;Andrena;Andrena ovatula;Germany;Bold;FBHAP547-09;-  
Hymenoptera;Andrenidae;Andrena;Andrena ovatula;Germany;Bold;GBACU2389-13;-  
Hymenoptera;Andrenidae;Andrena;Andrena suerinensis;Germany;Bold;FBAPC091-10;-  
Hymenoptera;Andrenidae;Andrena;Andrena suerinensis;Germany;Bold;FBAPC090-10;-  
Hymenoptera;Megachilidae;Anthidium;Anthidium montanum;Germany;Bold;FBAPB453-09;-  
Hymenoptera;Megachilidae;Anthidium;Anthidium montanum;Germany;Bold;FBAPB450-09;-  
Hymenoptera;Megachilidae;Anthidium;Anthidium montanum;Switzerland;Bold;FBAPB451-09;-  
Hymenoptera;Apidae;Bombus;Bombus alpinus;Italy;Bold;FBAPB991-09;-  
Hymenoptera;Apidae;Bombus;Bombus confusus;Germany;Bold;FBHAP773-09;-  
Hymenoptera;Apidae;Bombus;Bombus gerstaeckeri;Germany;Bold;FBHAP778-09;-  
Hymenoptera;Apidae;Bombus;Bombus monticola;Germany;Bold;FBAPC810-11;-  
Hymenoptera;Apidae;Bombus;Bombus monticola;Germany;Bold;FBHAP810-09;-  
Hymenoptera;Apidae;Bombus;Bombus mucidus;Germany;Bold;FBHAP812-09;-  
Hymenoptera;Apidae;Bombus;Bombus mucidus;Germany;Bold;FBHAP813-09;-  
Hymenoptera;Apidae;Bombus;Bombus muscorum;Norway;Bold;ARTNO110-17;-  
Hymenoptera;Colletidae;Colletes;Colletes floralis;Italy;Bold;FBAPB981-09;-  
Hymenoptera;Colletidae;Colletes;Colletes succinctus;Germany;Bold;GBACU2319-13;-  
Hymenoptera;Colletidae;Colletes;Colletes succinctus;Germany;Bold;FBHAP212-09;-  
Hymenoptera;Colletidae;Colletes;Colletes succinctus;Germany;Bold;GBACU2320-13;-  
Hymenoptera;Colletidae;Colletes;Colletes succinctus;Germany;Bold;GBACU2340-13;-  
Hymenoptera;Colletidae;Colletes;Colletes succinctus;Germany;Bold;FBHAP213-09;-  
Hymenoptera;Colletidae;Colletes;Colletes succinctus;Germany;Bold;GBACU2318-13;-  
Hymenoptera;Colletidae;Colletes;Colletes succinctus;Germany;Bold;GBACU2317-13;-  
Hymenoptera;Halictidae;Dufoirea;Dufoirea dentiventris;Italy;Bold;GBACU3257-13;-  
Hymenoptera;Halictidae;Dufoirea;Dufoirea inermis;Germany;Bold;FBAPB516-09;-  
Hymenoptera;Halictidae;Dufoirea;Dufoeria inermis;Germany;Bold;FBAPB515-09;-  
Hymenoptera;Halictidae;Dufoirea;Dufoeria minuta;Italy;Bold;GBACU3259-13;-  
Hymenoptera;Halictidae;Dufoirea;Dufoeria minuta;Italy;Bold;FBAPB518-09;-  
Hymenoptera;Halictidae;Dufoirea;Dufoeria minuta;Italy;Bold;GBACU2971-13;-  
Hymenoptera;Apidae;Epeolus;Epeolus cruciger;Germany;Bold;GBACU2178-13;-  
Hymenoptera;Apidae;Epeolus;Epeolus cruciger;Germany;Bold;FBAPC465-10;-  
Hymenoptera;Halictidae;Halictus;Halictus leucaheneus;Germany;Bold;FBAPB320-09;-  
Hymenoptera;Halictidae;Halictus;Halictus leucaheneus;Germany;Bold;FBAPB318-09;-

Hymenoptera;Halictidae;Halictus;Halictus quadricinctus;Germany;Bold;FBAPD445-11;-  
Hymenoptera;Halictidae;Lasioglossum;Lasioglossum brevicorne;Slovakia;Bold;GBACU1386-12;-  
Hymenoptera;Halictidae;Lasioglossum;Lasioglossum brevicorne;Germany;Bold;FBHAP671-09;-  
Hymenoptera;Halictidae;Lasioglossum;Lasioglossum brevicorne;Germany;Bold;FBAPB370-09;-  
Hymenoptera;Halictidae;Lasioglossum;Lasioglossum clypeare;Germany;Bold;FBAPC1007-11;-  
Hymenoptera;Halictidae;Lasioglossum;Lasioglossum convexiusculum;Germany;Bold;FBHAP676-09;-  
Hymenoptera;Halictidae;Lasioglossum;Lasioglossum convexiusculum;Italy;Bold;GBCHA1138-13;-  
Hymenoptera;Halictidae;Lasioglossum;Lasioglossum convexiusculum;Germany;Bold;FBAPC996-11;-  
Hymenoptera;Halictidae;Lasioglossum;Lasioglossum costulatum;Germany;Bold;FBAPB375-09;-  
Hymenoptera;Halictidae;Lasioglossum;Lasioglossum costulatum;Germany;Bold;FBAPB376-09;-  
Hymenoptera;Halictidae;Lasioglossum;Lasioglossum intermedium;Germany;Bold;FBAPD660-11;-  
Hymenoptera;Halictidae;Lasioglossum;Lasioglossum intermedium;Germany;Bold;FBAPB870-09;-  
Hymenoptera;Halictidae;Lasioglossum;Lasioglossum intermedium;Germany;Bold;GBCHA077-13;-  
Hymenoptera;Halictidae;Lasioglossum;Lasioglossum intermedium;Germany;Bold;FBAPB871-09;-  
Hymenoptera;Halictidae;Lasioglossum;Lasioglossum intermedium;Germany;Bold;FBAPB869-09;-  
Hymenoptera;Halictidae;Lasioglossum;Lasioglossum intermedium;Germany;Bold;GBCHA078-13;-  
Hymenoptera;Halictidae;Lasioglossum;Lasioglossum laevigatum;Austria;Bold;TDAT374-19;-  
Hymenoptera;Halictidae;Lasioglossum;Lasioglossum laevigatum;Italy;Bold;GBACU2958-13;-  
Hymenoptera;Halictidae;Lasioglossum;Lasioglossum laevigatum;Germany;Bold;FBHAP690-09;-  
Hymenoptera;Halictidae;Lasioglossum;Lasioglossum laevigatum;Italy;Bold;GBACU2959-13;-  
Hymenoptera;Halictidae;Lasioglossum;Lasioglossum majus;Germany;Bold;FBAPB893-09;-  
Hymenoptera;Halictidae;Lasioglossum;Lasioglossum majus;Germany;Bold;FBAPB892-09;-  
Hymenoptera;Halictidae;Lasioglossum;Lasioglossum marginellum;Germany;Bold;FBAPD650-11;-  
Hymenoptera;Halictidae;Lasioglossum;Lasioglossum minutulum;Germany;Bold;FBAPB898-09;-  
Hymenoptera;Halictidae;Lasioglossum;Lasioglossum minutulum;Germany;Bold;FBAPB897-09;-  
Hymenoptera;Halictidae;Lasioglossum;Lasioglossum minutulum;Germany;Bold;FBAPB899-09;-  
Hymenoptera;Halictidae;Lasioglossum;Lasioglossum minutulum;Germany;Bold;FBHAP716-09;-  
Hymenoptera;Halictidae;Lasioglossum;Lasioglossum minutulum;Germany;Bold;GBCHA073-13;-  
Hymenoptera;Halictidae;Lasioglossum;Lasioglossum prasinum;Germany;Bold;FBAPB920-09;-  
Hymenoptera;Halictidae;Lasioglossum;Lasioglossum prasinum;Germany;Bold;FBAPB919-09;-  
Hymenoptera;Halictidae;Lasioglossum;Lasioglossum prasinum;Italy;Bold;FBAPB918-09;-  
Hymenoptera;Halictidae;Lasioglossum;Lasioglossum prasinum;Germany;Bold;FBAPB921-09;-  
Hymenoptera;Halictidae;Lasioglossum;Lasioglossum pygmaeum;Germany;Bold;FBAPD483-11;-  
Hymenoptera;Halictidae;Lasioglossum;Lasioglossum pygmaeum;Germany;Bold;FBAPD482-11;-  
Hymenoptera;Halictidae;Lasioglossum;Lasioglossum pygmaeum;Germany;Bold;FBAPD481-11;-  
Hymenoptera;Halictidae;Lasioglossum;Lasioglossum pygmaeum;Germany;Bold;FBAPB927-09;-  
Hymenoptera;Halictidae;Lasioglossum;Lasioglossum quadrinotatum;Germany;Bold;FBAPC424-10;-  
Hymenoptera;Halictidae;Lasioglossum;Lasioglossum quadrinotatum;Germany;Bold;FBAPC425-10;-  
Hymenoptera;Halictidae;Lasioglossum;Lasioglossum quadrinotatum;Germany;Bold;FBAPC423-10;-  
Hymenoptera;Halictidae;Lasioglossum;Lasioglossum quadrinotatum;Italy;Bold;FBAPB937-09;-  
Hymenoptera;Halictidae;Lasioglossum;Lasioglossum quadrinotatum;Germany;Bold;FBAPC422-10;-  
Hymenoptera;Halictidae;Lasioglossum;Lasioglossum sexnotatum;Germany;Bold;FBAPC1022-11;-  
Hymenoptera;Halictidae;Lasioglossum;Lasioglossum sexnotatum;Germany;Bold;FBAPB951-09;-  
Hymenoptera;Halictidae;Lasioglossum;Lasioglossum sexnotatum;Germany;Bold;FBACB916-11;-  
Hymenoptera;Halictidae;Lasioglossum;Lasioglossum sexnotatum;Germany;Bold;FBAPB952-09;-  
Hymenoptera;Halictidae;Lasioglossum;Lasioglossum sexnotatum;Germany;Bold;FBAPC387-10;-  
Hymenoptera;Halictidae;Lasioglossum;Lasioglossum sexnotatum;Germany;Bold;FBAPC386-10;-  
Hymenoptera;Halictidae;Lasioglossum;Lasioglossum sexnotatum;Germany;Bold;FBAPC1021-11;-  
Hymenoptera;Halictidae;Lasioglossum;Lasioglossum subfasciatum;France;Bold;GBACU3066-13;-  
Hymenoptera;Halictidae;Lasioglossum;Lasioglossum subfasciatum;Switzerland;Bold;FBAPB958-09;-  
Hymenoptera;Halictidae;Lasioglossum;Lasioglossum subfasciatum;Italy;Bold;FBAPB956-09;-  
Hymenoptera;Halictidae;Lasioglossum;Lasioglossum subfasciatum;Italy;Bold;FBAPB957-09;-  
Hymenoptera;Halictidae;Lasioglossum;Lasioglossum subfasciatum;Germany;Bold;FBAPC1013-11;-  
Hymenoptera;Halictidae;Lasioglossum;Lasioglossum subfasciatum;Germany;Bold;FBAPC1014-11;-  
Hymenoptera;Melittidae;Melitta;Melitta tricincta;Germany;Bold;BCHYM2159-14;-  
Hymenoptera;Melittidae;Melitta;Melitta tricincta;Germany;Bold;FBAPC110-10;-  
Hymenoptera;Apidae;Nomada;Nomada argentata;Germany;Bold;FBAPB133-09;-  
Hymenoptera;Apidae;Nomada;Nomada armata;Germany;Bold;FBAPB135-09;-  
Hymenoptera;Apidae;Nomada;Nomada armata;Germany;Bold;FBHAP640-09;-  
Hymenoptera;Apidae;Nomada;Nomada armata;Germany;Bold;FBAPC161-10;-  
Hymenoptera;Apidae;Nomada;Nomada mutica;Germany;Bold;FBAPB250-09;-  
Hymenoptera;Apidae;Nomada;Nomada mutica;Germany;Bold;FBAPB251-09;-  
Hymenoptera;Apidae;Nomada;Nomada mutica;Germany;Bold;FBAPB252-09;-  
Hymenoptera;Apidae;Nomada;Nomada rhenana;France;Bold;FBAPB268-09;-  
Hymenoptera;Apidae;Nomada;Nomada rhenana;France;Bold;FBAPB267-09;-  
Hymenoptera;Apidae;Nomada;Nomada roberjeotiana;Germany;Bold;FBAPB270-09;-  
Hymenoptera;Halictidae;Rophites;Rophites quinquespinosus;Germany;Bold;GBACU2373-13;-  
Hymenoptera;Halictidae;Rophites;Rophites quinquespinosus;Germany;Bold;GBACU2374-13;-  
Hymenoptera;Halictidae;Rophites;Rophites quinquespinosus;Germany;Bold;GBACU2370-13;-  
Hymenoptera;Halictidae;Rophites;Rophites quinquespinosus;Czech Republic;Bold;GBACU1377-12;-  
Hymenoptera;Halictidae;Rophites;Rophites quinquespinosus;Germany;Bold;FBAPB773-09;-  
Hymenoptera;Halictidae;Rophites;Rophites quinquespinosus;Germany;Bold;BCHYM2157-14;-  
Hymenoptera;Halictidae;Rophites;Rophites quinquespinosus;Germany;Bold;BCHYM2158-14;-  
Hymenoptera;Halictidae;Rophites;Rophites quinquespinosus;Germany;Bold;FBAPD509-11;-  
Hymenoptera;Halictidae;Sphecodes;Sphecodes cristatus;Germany;Bold;FBAPB070-09;-  
Hymenoptera;Halictidae;Sphecodes;Sphecodes cristatus;Germany;Bold;FBAPB069-09;-  
Hymenoptera;Halictidae;Sphecodes;Sphecodes cristatus;Germany;Bold;FBAPB068-09;-  
Hymenoptera;Halictidae;Sphecodes;Sphecodes croaticus;Italy;Bold;GBCHA969-13;-

Hymenoptera;Halictidae;Sphecodes;Sphecodes croaticus;Germany;Bold;BCHYM1615-14;-  
Hymenoptera;Halictidae;Sphecodes;Sphecodes hyalinatus;Germany;Bold;FBHAP617-09;-  
Hymenoptera;Halictidae;Sphecodes;Sphecodes majalis;Germany;Bold;FBAPB080-09;-  
Hymenoptera;Halictidae;Sphecodes;Sphecodes majalis;Germany;Bold;FBAPB078-09;-  
Hymenoptera;Halictidae;Sphecodes;Sphecodes majalis;Germany;Bold;GBACU806-12;-  
Hymenoptera;Halictidae;Sphecodes;Sphecodes rubicundus;France;Bold;FBAPB088-09;-  
Hymenoptera;Halictidae;Sphecodes;Sphecodes rubicundus;France;Bold;FBAPB089-09;-  
Hymenoptera;Halictidae;Sphecodes;Sphecodes schenckii;Italy;Bold;FBAPB104-09;-  
Hymenoptera;Halictidae;Sphecodes;Sphecodes spinulosus;Germany;Bold;FBAPB109-09;-  
Hymenoptera;Halictidae;Sphecodes;Sphecodes spinulosus;Germany;Bold;FBAPD472-11;-  
Hymenoptera;Halictidae;Sphecodes;Sphecodes spinulosus;Germany;Bold;BCHYM4575-14;-  
Hymenoptera;Halictidae;Sphecodes;Sphecodes spinulosus;Germany;Bold;FBAPB771-09;-  
Hymenoptera;Halictidae;Sphecodes;Sphecodes spinulosus;Germany;Bold;GBACU851-12;-  
Hymenoptera;Halictidae;Sphecodes;Sphecodes spinulosus;Germany;Bold;FBAPD698-11;-  
Hymenoptera;Halictidae;Sphecodes;Sphecodes spinulosus;Germany;Bold;GBACU2962-13;-  
Hymenoptera;Halictidae;Sphecodes;Sphecodes spinulosus;Germany;Bold;FBAPB772-09;-  
Hymenoptera;Halictidae;Sphecodes;Sphecodes spinulosus;Germany;Bold;FBAPD700-11;-  
Hymenoptera;Halictidae;Sphecodes;Sphecodes spinulosus;Germany;Bold;FBAPB107-09;-  
Hymenoptera;Halictidae;Sphecodes;Sphecodes spinulosus;Germany;Bold;FBAPB108-09;-  
Hymenoptera;Halictidae;Sphecodes;Sphecodes spinulosus;Germany;Bold;FBAPD699-11;-  
Hymenoptera;Halictidae;Sphecodes;Sphecodes spinulosus;Germany;Bold;FBAPB110-09;-  
Hymenoptera;Halictidae;Systropha;Systropha curvicornis;Germany;Bold;GBACU1165-12;-  
Hymenoptera;Halictidae;Systropha;Systropha curvicornis;Germany;Bold;GBACU1166-12;-  
Hymenoptera;Halictidae;Systropha;Systropha curvicornis;Germany;Bold;GBACU1164-12;-  
Lepidoptera;Nymphalidae;Aglais;Aglais urticae;Switzerland;Bold;LEPAA612-16;-  
Lepidoptera;Nymphalidae;Apatura;Apatura ilia;Austria;Bold;LEASS998-17;-  
Lepidoptera;Nymphalidae;Apatura;Apatura iris;Austria;Bold;LEASS841-17;-  
Lepidoptera;Pieridae;Aporia;Aporia crataegi;Norway;Bold;LON6180-17;-  
Lepidoptera;Pieridae;Aporia;Aporia crataegi;Norway;Bold;LON6179-17;-  
Lepidoptera;Nymphalidae;Argynnis;Argynnis adippe;Austria;Bold;PHLAI484-13;-  
Lepidoptera;Nymphalidae;Argynnis;Argynnis adippe;Austria;Bold;LEASS1000-17;-  
Lepidoptera;Nymphalidae;Argynnis;Argynnis aglaja;United Kingdom;Bold;ANBIO099-19;-  
Lepidoptera;Nymphalidae;Argynnis;Argynnis niobe;Norway;Bold;LON5660-17;-  
Lepidoptera;Nymphalidae;Argynnis;Argynnis paphia;Germany;Bold;AMTPC536-15;-  
Lepidoptera;Nymphalidae;Argynnis;Argynnis paphia;Switzerland;Bold;LEPAA680-16;-  
Lepidoptera;Lycaenidae;Aricia;Aricia agestis;Italy;Bold;LEATH724-14;-  
Lepidoptera;Lycaenidae;Aricia;Aricia agestis;Netherlands;Bold;NLLEA1493-14;-  
Lepidoptera;Lycaenidae;Aricia;Aricia agestis;Switzerland;Bold;LEPPA1224-17;-  
Lepidoptera;Lycaenidae;Aricia;Aricia agestis;Austria;Bold;LEASS834-17;-  
Lepidoptera;Lycaenidae;Aricia;Aricia agestis;Austria;Bold;LEASS833-17;-  
Lepidoptera;Lycaenidae;Aricia;Aricia agestis;Switzerland;Bold;LEPPA1220-17;-  
Lepidoptera;Lycaenidae;Aricia;Aricia agestis;Switzerland;Bold;LEPAA636-16;-  
Lepidoptera;Lycaenidae;Aricia;Aricia artaxerxes;Austria;Bold;PHLAI509-13;-  
Lepidoptera;Lycaenidae;Aricia;Aricia artaxerxes;Switzerland;Bold;LEPAA454-16;-  
Lepidoptera;Lycaenidae;Aricia;Aricia artaxerxes;Switzerland;Bold;LEPPA1227-17;-  
Lepidoptera;Lycaenidae;Aricia;Aricia artaxerxes;Austria;Bold;PHLAH468-12;-  
Lepidoptera;Lycaenidae;Aricia;Aricia artaxerxes;Austria;Bold;PHLAH469-12;-  
Lepidoptera;Lycaenidae;Aricia;Aricia nicias;Switzerland;Bold;LEPAA764-16;-  
Lepidoptera;Lycaenidae;Aricia;Aricia nicias;Switzerland;Bold;LEPAA845-16;-  
Lepidoptera;Lycaenidae;Aricia;Aricia nicias;Switzerland;Bold;LEPAA606-16;-  
Lepidoptera;Nymphalidae;Boloria;Boloria euphrosyne;Austria;Bold;PHLAI485-13;-  
Lepidoptera;Nymphalidae;Boloria;Boloria euphrosyne;Norway;Bold;LON4631-16;-  
Lepidoptera;Nymphalidae;Boloria;Boloria napaea;Italy;Bold;LEATG438-14;-  
Lepidoptera;Nymphalidae;Boloria;Boloria napaea;Norway;Bold;LON5658-17;-  
Lepidoptera;Nymphalidae;Boloria;Boloria napaea;Austria;Bold;LEASS1003-17;-  
Lepidoptera;Nymphalidae;Boloria;Boloria pales;Switzerland;Bold;LEPAA082-16;-  
Lepidoptera;Nymphalidae;Boloria;Boloria pales;Austria;Bold;LEATJ1300-16;-  
Lepidoptera;Nymphalidae;Boloria;Boloria pales;Austria;Bold;LEATJ1304-16;-  
Lepidoptera;Nymphalidae;Boloria;Boloria selene;Switzerland;Bold;LEPAA484-16;-  
Lepidoptera;Nymphalidae;Boloria;Boloria selene;Switzerland;Bold;LEPAA110-16;-  
Lepidoptera;Nymphalidae;Boloria;Boloria selene;Switzerland;Bold;LEPAA716-16;-  
Lepidoptera;Nymphalidae;Boloria;Boloria thore;Norway;Bold;LON5666-17;-  
Lepidoptera;Nymphalidae;Boloria;Boloria titania;Switzerland;Bold;LEPAA682-16;-  
Lepidoptera;Nymphalidae;Brenthis;Brenthis daphne;Switzerland;Bold;LEPAA016-16;-  
Lepidoptera;Nymphalidae;Brenthis;Brenthis daphne;Austria;Bold;LEASS1002-17;-  
Lepidoptera;Nymphalidae;Brenthis;Brenthis hecate;Austria;Bold;ABOLD484-16;-  
Lepidoptera;Nymphalidae;Brenthis;Brenthis ino;Austria;Bold;PHLAI482-13;-  
Lepidoptera;Lycaenidae;Callophrys;Callophrys rubi;Norway;Bold;LON4577-16;-  
Lepidoptera;Hesperiidae;Carcharodus;Carcharodus alceae;Austria;Bold;LEASS670-17;-  
Lepidoptera;Hesperiidae;Carcharodus;Carcharodus alceae;Croatia;Bold;LON7250-18;-  
Lepidoptera;Hesperiidae;Carcharodus;Carcharodus alceae;Greece;Bold;LON4617-16;-  
Lepidoptera;Hesperiidae;Carcharodus;Carcharodus alceae;Switzerland;Bold;LEPAA065-16;-  
Lepidoptera;Hesperiidae;Carcharodus;Carcharodus alceae;Italy;Bold;LEATG398-14;-  
Lepidoptera;Hesperiidae;Carcharodus;Carcharodus lavatherae;Austria;Bold;ABOLD487-16;-  
Lepidoptera;Hesperiidae;Carcharodus;Carcharodus lavatherae;Austria;Bold;ABOLD486-16;-  
Lepidoptera;Hesperiidae;Carcharodus;Carcharodus lavatherae;Switzerland;Bold;LEPAA753-16;-  
Lepidoptera;Hesperiidae;Carterocephalus;Carterocephalus palaemon;Austria;Bold;LEASS501-17;-  
Lepidoptera;Hesperiidae;Carterocephalus;Carterocephalus palaemon;Switzerland;Bold;LEPAA148-16;-



Lepidoptera;Hesperiidae;Carterocephalus;Carterocephalus palaemon;Austria;Bold;PHLAI511-13;-  
 Lepidoptera;Lycaenidae;Celastrina;Celastrina argiolus;Norway;Bold;LON5648-17;-  
 Lepidoptera;Lycaenidae;Celastrina;Celastrina argiolus;Switzerland;Bold;LEPAA119-16;-  
 Lepidoptera;Lycaenidae;Celastrina;Celastrina argiolus;Switzerland;Bold;LEPAA328-16;-  
 Lepidoptera;Nymphalidae;Chazara;Chazara briseis;Austria;Bold;LEASS989-17;-  
 Lepidoptera;Nymphalidae;Coenonympha;Coenonympha darwiniana;Austria;Bold;LEASS1061-17;-  
 Lepidoptera;Nymphalidae;Coenonympha;Coenonympha darwiniana;Switzerland;Bold;LEPPA1183-17;-  
 Lepidoptera;Nymphalidae;Coenonympha;Coenonympha darwiniana;Switzerland;Bold;LEPAA174-16;-  
 Lepidoptera;Nymphalidae;Coenonympha;Coenonympha darwiniana;Austria;Bold;LEASS1060-17;-  
 Lepidoptera;Nymphalidae;Coenonympha;Coenonympha darwiniana;Austria;Bold;PHLAA708-09;-  
 Lepidoptera;Nymphalidae;Coenonympha;Coenonympha gardetta;Switzerland;Bold;LEPAA529-16;-  
 Lepidoptera;Nymphalidae;Coenonympha;Coenonympha gardetta;Switzerland;Bold;LEPPA1189-17;-  
 Lepidoptera;Nymphalidae;Coenonympha;Coenonympha gardetta;Switzerland;Bold;LEPAA677-16;-  
 Lepidoptera;Nymphalidae;Coenonympha;Coenonympha gardetta;Switzerland;Bold;LEPPA1265-17;-  
 Lepidoptera;Nymphalidae;Coenonympha;Coenonympha gardetta;Switzerland;Bold;LEPPA1194-17;-  
 Lepidoptera;Nymphalidae;Coenonympha;Coenonympha gardetta;Switzerland;Bold;LEPPA1191-17;-  
 Lepidoptera;Nymphalidae;Coenonympha;Coenonympha gardetta;Switzerland;Bold;LEPAA507-16;-  
 Lepidoptera;Nymphalidae;Coenonympha;Coenonympha glycerion;Switzerland;Bold;LEPAA728-16;-  
 Lepidoptera;Nymphalidae;Coenonympha;Coenonympha glycerion;Switzerland;Bold;LEPPA1243-17;-  
 Lepidoptera;Nymphalidae;Coenonympha;Coenonympha glycerion;Austria;Bold;LEASS981-17;-  
 Lepidoptera;Nymphalidae;Coenonympha;Coenonympha oedippus;Italy;Bold;OEDIP017-18;-  
 Lepidoptera;Nymphalidae;Coenonympha;Coenonympha oedippus;Poland;Bold;OEDIP002-18;-  
 Lepidoptera;Nymphalidae;Coenonympha;Coenonympha oedippus;France;Bold;OEDIP016-18;-  
 Lepidoptera;Nymphalidae;Coenonympha;Coenonympha oedippus;Poland;Bold;OEDIP035-18;-  
 Lepidoptera;Nymphalidae;Coenonympha;Coenonympha oedippus;Germany;Bold;OEDIP025-18;-  
 Lepidoptera;Nymphalidae;Coenonympha;Coenonympha oedippus;Poland;Bold;OEDIP038-18;-  
 Lepidoptera;Nymphalidae;Coenonympha;Coenonympha oedippus;France;Bold;OEDIP015-18;-  
 Lepidoptera;Nymphalidae;Coenonympha;Coenonympha oedippus;France;Bold;OEDIP032-18;-  
 Lepidoptera;Nymphalidae;Coenonympha;Coenonympha oedippus;France;Bold;OEDIP030-18;-  
 Lepidoptera;Nymphalidae;Coenonympha;Coenonympha oedippus;France;Bold;OEDIP008-18;-  
 Lepidoptera;Nymphalidae;Coenonympha;Coenonympha oedippus;France;Bold;OEDIP024-18;-  
 Lepidoptera;Nymphalidae;Coenonympha;Coenonympha oedippus;Poland;Bold;OEDIP001-18;-  
 Lepidoptera;Nymphalidae;Coenonympha;Coenonympha oedippus;France;Bold;OEDIP022-18;-  
 Lepidoptera;Nymphalidae;Coenonympha;Coenonympha oedippus;Italy;Bold;OEDIP011-18;-  
 Lepidoptera;Nymphalidae;Coenonympha;Coenonympha oedippus;France;Bold;OEDIP029-18;-  
 Lepidoptera;Nymphalidae;Coenonympha;Coenonympha oedippus;France;Bold;OEDIP003-18;-  
 Lepidoptera;Nymphalidae;Coenonympha;Coenonympha oedippus;France;Bold;OEDIP033-18;-  
 Lepidoptera;Nymphalidae;Coenonympha;Coenonympha oedippus;Liechtenstein;Bold;OEDIP034-18;-  
 Lepidoptera;Nymphalidae;Coenonympha;Coenonympha oedippus;France;Bold;OEDIP028-18;-  
 Lepidoptera;Nymphalidae;Coenonympha;Coenonympha oedippus;Slovenia;Bold;OEDIP006-18;-  
 Lepidoptera;Nymphalidae;Coenonympha;Coenonympha oedippus;France;Bold;OEDIP007-18;-  
 Lepidoptera;Nymphalidae;Coenonympha;Coenonympha oedippus;Italy;Bold;OEDIP018-18;-  
 Lepidoptera;Nymphalidae;Coenonympha;Coenonympha oedippus;Slovenia;Bold;OEDIP010-18;-  
 Lepidoptera;Nymphalidae;Coenonympha;Coenonympha oedippus;Slovenia;Bold;OEDIP005-18;-  
 Lepidoptera;Nymphalidae;Coenonympha;Coenonympha oedippus;France;Bold;OEDIP023-18;-  
 Lepidoptera;Nymphalidae;Coenonympha;Coenonympha oedippus;Slovenia;Bold;OEDIP020-18;-  
 Lepidoptera;Nymphalidae;Coenonympha;Coenonympha oedippus;Slovenia;Bold;OEDIP009-18;-  
 Lepidoptera;Nymphalidae;Coenonympha;Coenonympha oedippus;Liechtenstein;Bold;OEDIP026-18;-  
 Lepidoptera;Nymphalidae;Coenonympha;Coenonympha oedippus;Slovenia;Bold;OEDIP019-18;-  
 Lepidoptera;Nymphalidae;Coenonympha;Coenonympha oedippus;Italy;Bold;OEDIP004-18;-  
 Lepidoptera;Nymphalidae;Coenonympha;Coenonympha oedippus;Italy;Bold;OEDIP014-18;-  
 Lepidoptera;Nymphalidae;Coenonympha;Coenonympha oedippus;Italy;Bold;OEDIP037-18;-  
 Lepidoptera;Nymphalidae;Coenonympha;Coenonympha oedippus;Germany;Bold;OEDIP027-18;-  
 Lepidoptera;Nymphalidae;Coenonympha;Coenonympha oedippus;Italy;Bold;OEDIP013-18;-  
 Lepidoptera;Nymphalidae;Coenonympha;Coenonympha oedippus;Italy;Bold;OEDIP036-18;-  
 Lepidoptera;Nymphalidae;Coenonympha;Coenonympha oedippus;Italy;Bold;OEDIP012-18;-  
 Lepidoptera;Nymphalidae;Coenonympha;Coenonympha oedippus;Slovenia;Bold;OEDIP021-18;-  
 Lepidoptera;Nymphalidae;Coenonympha;Coenonympha oedippus;France;Bold;OEDIP031-18;-  
 Lepidoptera;Nymphalidae;Coenonympha;Coenonympha pamphilus;Switzerland;Bold;LEPAA370-16;-  
 Lepidoptera;Pieridae;Colias;Colias alfacariensis;Italy;Bold;SACOL239-18;-  
 Lepidoptera;Pieridae;Colias;Colias alfacariensis;France;Bold;SACOL235-18;-  
 Lepidoptera;Pieridae;Colias;Colias alfacariensis;Switzerland;Bold;LEPAA430-16;-  
 Lepidoptera;Pieridae;Colias;Colias alfacariensis;Italy;Bold;ABOLB052-15;-  
 Lepidoptera;Pieridae;Colias;Colias alfacariensis;Russia;Bold;SACOL346-19;-  
 Lepidoptera;Pieridae;Colias;Colias hyale;Sweden;Bold;LON5677-17;-  
 Lepidoptera;Pieridae;Colias;Colias hyale;Turkey;Bold;SACOL242-18;-  
 Lepidoptera;Pieridae;Colias;Colias hyale;Russia;Bold;SACOL246-18;-  
 Lepidoptera;Pieridae;Colias;Colias hyale;Russia;Bold;SACOL249-18;-  
 Lepidoptera;Pieridae;Colias;Colias palaeno;Switzerland;Bold;LEPAA679-16;-  
 Lepidoptera;Pieridae;Colias;Colias palaeno;Italy;Bold;LEATG527-14;-  
 Lepidoptera;Pieridae;Colias;Colias palaeno;Switzerland;Bold;LEPAA212-16;-  
 Lepidoptera;Pieridae;Colias;Colias palaeno;Switzerland;Bold;LEPAA748-16;-  
 Lepidoptera;Pieridae;Colias;Colias palaeno;Norway;Bold;LON4623-16;-  
 Lepidoptera;Lycaenidae;Cupido;Cupido alcetas;Switzerland;Bold;LEPAA172-16;-  
 Lepidoptera;Lycaenidae;Cupido;Cupido alcetas;Switzerland;Bold;LEPAA181-16;-  
 Lepidoptera;Lycaenidae;Cupido;Cupido argiades;Switzerland;Bold;LEPAA813-16;-  
 Lepidoptera;Lycaenidae;Cupido;Cupido argiades;Switzerland;Bold;LEPAA676-16;-  
 Lepidoptera;Lycaenidae;Cupido;Cupido argiades;Switzerland;Bold;LEPAA664-16;-

Lepidoptera;Lycaenidae;Cupido;Cupido minimus;Switzerland;Bold;LEPAA115-16;-  
 Lepidoptera;Lycaenidae;Cupido;Cupido minimus;Austria;Bold;LEASS543-17;-  
 Lepidoptera;Nymphalidae;Cupido;Cupido minimus;Austria;Bold;PHLAI500-13;-  
 Lepidoptera;Lycaenidae;Cupido;Cupido osiris;Austria;Bold;ABOLD493-16;-  
 Lepidoptera;Lycaenidae;Cupido;Cupido osiris;Switzerland;Bold;LEPAA790-16;-  
 Lepidoptera;Lycaenidae;Cupido;Cupido osiris;Switzerland;Bold;LEPAA772-16;-  
 Lepidoptera;Lycaenidae;Cyaniris;Cyaniris semiargus;Switzerland;Bold;LEPAA147-16;-  
 Lepidoptera;Lycaenidae;Cyaniris;Cyaniris semiargus;Austria;Bold;PHLAI497-13;-  
 Lepidoptera;Nymphalidae;Erebia;Erebia arvernensis;Switzerland;Bold;LEPPA1196-17;-  
 Lepidoptera;Nymphalidae;Erebia;Erebia epiphron;Austria;Bold;HBOK108-08;-  
 Lepidoptera;Nymphalidae;Erebia;Erebia epiphron;Italy;Bold;LEASW1772-20;-  
 Lepidoptera;Nymphalidae;Erebia;Erebia eriphyle;Austria;Bold;HBOK102-08;-  
 Lepidoptera;Nymphalidae;Erebia;Erebia eriphyle;Austria;Bold;ABOLD039-16;-  
 Lepidoptera;Nymphalidae;Erebia;Erebia euryale;Switzerland;Bold;LEPAA112-16;-  
 Lepidoptera;Nymphalidae;Erebia;Erebia euryale;Austria;Bold;CUPED080-16;-  
 Lepidoptera;Nymphalidae;Erebia;Erebia euryale;Austria;Bold;CUPED079-16;-  
 Lepidoptera;Nymphalidae;Erebia;Erebia euryale;Austria;Bold;CUPED075-16;-  
 Lepidoptera;Nymphalidae;Erebia;Erebia euryale;Austria;Bold;CUPED094-16;-  
 Lepidoptera;Nymphalidae;Erebia;Erebia euryale;Austria;Bold;CUPED090-16;-  
 Lepidoptera;Nymphalidae;Erebia;Erebia euryale;Austria;Bold;CUPED077-16;-  
 Lepidoptera;Nymphalidae;Erebia;Erebia euryale;Austria;Bold;CUPED081-16;-  
 Lepidoptera;Nymphalidae;Erebia;Erebia euryale;Austria;Bold;CUPED089-16;-  
 Lepidoptera;Nymphalidae;Erebia;Erebia euryale;Austria;Bold;CUPED091-16;-  
 Lepidoptera;Nymphalidae;Erebia;Erebia euryale;Austria;Bold;CUPED084-16;-  
 Lepidoptera;Nymphalidae;Erebia;Erebia euryale;Austria;Bold;PHLAI491-13;-  
 Lepidoptera;Nymphalidae;Erebia;Erebia euryale;Austria;Bold;CUPED087-16;-  
 Lepidoptera;Nymphalidae;Erebia;Erebia euryale;Austria;Bold;CUPED088-16;-  
 Lepidoptera;Nymphalidae;Erebia;Erebia euryale;Austria;Bold;CUPED093-16;-  
 Lepidoptera;Nymphalidae;Erebia;Erebia euryale;Austria;Bold;CUPED078-16;-  
 Lepidoptera;Nymphalidae;Erebia;Erebia euryale;Austria;Bold;CUPED086-16;-  
 Lepidoptera;Nymphalidae;Erebia;Erebia euryale;Austria;Bold;CUPED076-16;-  
 Lepidoptera;Nymphalidae;Erebia;Erebia euryale;Austria;Bold;CUPED095-16;-  
 Lepidoptera;Nymphalidae;Erebia;Erebia euryale;Austria;Bold;CUPED092-16;-  
 Lepidoptera;Nymphalidae;Erebia;Erebia euryale;Austria;Bold;CUPED082-16;-  
 Lepidoptera;Nymphalidae;Erebia;Erebia euryale;Austria;Bold;CUPED083-16;-  
 Lepidoptera;Nymphalidae;Erebia;Erebia euryale;Switzerland;Bold;LEPPA1185-17;-  
 Lepidoptera;Nymphalidae;Erebia;Erebia euryale;Switzerland;Bold;LEPAA861-16;-  
 Lepidoptera;Nymphalidae;Erebia;Erebia euryale;Italy;Bold;CUPED065-16;-  
 Lepidoptera;Nymphalidae;Erebia;Erebia euryale;Italy;Bold;LEASW1769-20;-  
 Lepidoptera;Nymphalidae;Erebia;Erebia euryale;Austria;Bold;CUPED085-16;-  
 Lepidoptera;Nymphalidae;Erebia;Erebia flavofasciata;Austria;Bold;HBOK105-08;-  
 Lepidoptera;Nymphalidae;Erebia;Erebia flavofasciata;Switzerland;Bold;LEPAA773-16;-  
 Lepidoptera;Nymphalidae;Erebia;Erebia gorge;Austria;Bold;HBOK125-08;-  
 Lepidoptera;Nymphalidae;Erebia;Erebia ligea;Austria;Bold;HBOK096-08;-  
 Lepidoptera;Nymphalidae;Erebia;Erebia ligea;Switzerland;Bold;LEPAA102-16;-  
 Lepidoptera;Nymphalidae;Erebia;Erebia manto;Austria;Bold;CUPED015-16;-  
 Lepidoptera;Nymphalidae;Erebia;Erebia manto;Austria;Bold;CUPED016-16;-  
 Lepidoptera;Nymphalidae;Erebia;Erebia manto;Austria;Bold;CUPED021-16;-  
 Lepidoptera;Nymphalidae;Erebia;Erebia manto;Austria;Bold;CUPED028-16;-  
 Lepidoptera;Nymphalidae;Erebia;Erebia manto;Austria;Bold;CUPED024-16;-  
 Lepidoptera;Nymphalidae;Erebia;Erebia manto;Austria;Bold;CUPED034-16;-  
 Lepidoptera;Nymphalidae;Erebia;Erebia manto;Austria;Bold;CUPED023-16;-  
 Lepidoptera;Nymphalidae;Erebia;Erebia manto;Austria;Bold;CUPED031-16;-  
 Lepidoptera;Nymphalidae;Erebia;Erebia manto;Austria;Bold;CUPED033-16;-  
 Lepidoptera;Nymphalidae;Erebia;Erebia manto;Switzerland;Bold;LEPPA1186-17;-  
 Lepidoptera;Nymphalidae;Erebia;Erebia manto;Switzerland;Bold;LEPPA1188-17;-  
 Lepidoptera;Nymphalidae;Erebia;Erebia manto;Switzerland;Bold;LEPAA502-16;-  
 Lepidoptera;Nymphalidae;Erebia;Erebia manto;Switzerland;Bold;LEPPA1187-17;-  
 Lepidoptera;Nymphalidae;Erebia;Erebia manto;Switzerland;Bold;LEPAA958-18;-  
 Lepidoptera;Nymphalidae;Erebia;Erebia manto;Austria;Bold;CUPED022-16;-  
 Lepidoptera;Nymphalidae;Erebia;Erebia manto;Austria;Bold;CUPED014-16;-  
 Lepidoptera;Nymphalidae;Erebia;Erebia manto;Austria;Bold;CUPED036-16;-  
 Lepidoptera;Nymphalidae;Erebia;Erebia manto;Austria;Bold;CUPED027-16;-  
 Lepidoptera;Nymphalidae;Erebia;Erebia manto;Austria;Bold;CUPED032-16;-  
 Lepidoptera;Nymphalidae;Erebia;Erebia manto;Austria;Bold;CUPED018-16;-  
 Lepidoptera;Nymphalidae;Erebia;Erebia manto;Austria;Bold;CUPED029-16;-  
 Lepidoptera;Nymphalidae;Erebia;Erebia manto;Austria;Bold;CUPED019-16;-  
 Lepidoptera;Nymphalidae;Erebia;Erebia manto;Austria;Bold;CUPED025-16;-  
 Lepidoptera;Nymphalidae;Erebia;Erebia manto;Austria;Bold;CUPED026-16;-  
 Lepidoptera;Nymphalidae;Erebia;Erebia manto;Austria;Bold;CUPED035-16;-  
 Lepidoptera;Nymphalidae;Erebia;Erebia manto;Austria;Bold;CUPED017-16;-  
 Lepidoptera;Nymphalidae;Erebia;Erebia manto;Austria;Bold;CUPED020-16;-  
 Lepidoptera;Nymphalidae;Erebia;Erebia manto;Austria;Bold;CUPED030-16;-  
 Lepidoptera;Nymphalidae;Erebia;Erebia medusa;Austria;Bold;HBOK120-08;-  
 Lepidoptera;Nymphalidae;Erebia;Erebia melampus;Austria;Bold;HBOK111-08;-  
 Lepidoptera;Nymphalidae;Erebia;Erebia melampus;Switzerland;Bold;LEPAA164-16;-  
 Lepidoptera;Nymphalidae;Erebia;Erebia melampus;Austria;Bold;HBOK112-08;-  
 Lepidoptera;Nymphalidae;Erebia;Erebia meolans;Austria;Bold;HBOK159-08;-

Lepidoptera;Nymphalidae;Erebia;Erebia meolans;Austria;Bold;HBOK160-08;-  
 Lepidoptera;Nymphalidae;Erebia;Erebia montana;Switzerland;Bold;LEPAA311-16;-  
 Lepidoptera;Nymphalidae;Erebia;Erebia nivalis;Austria;Bold;LEASS843-17;-  
 Lepidoptera;Nymphalidae;Erebia;Erebia nivalis;Switzerland;Bold;LEPAA774-16;-  
 Lepidoptera;Nymphalidae;Erebia;Erebia oeme;Italy;Bold;LEATD015-13;-  
 Lepidoptera;Nymphalidae;Erebia;Erebia oeme;Austria;Bold;HBOK147-08;-  
 Lepidoptera;Nymphalidae;Erebia;Erebia oeme;Austria;Bold;HBOK148-08;-  
 Lepidoptera;Nymphalidae;Erebia;Erebia pandrose;Austria;Bold;HBOK164-08;-  
 Lepidoptera;Nymphalidae;Erebia;Erebia pharte;Austria;Bold;HBOK110-08;-  
 Lepidoptera;Nymphalidae;Erebia;Erebia pharte;Austria;Bold;HBOK109-08;-  
 Lepidoptera;Nymphalidae;Erebia;Erebia pluto;Switzerland;Bold;LEPAA494-16;-  
 Lepidoptera;Nymphalidae;Erebia;Erebia pluto;Austria;Bold;HBOK123-08;-  
 Lepidoptera;Nymphalidae;Erebia;Erebia pluto;Austria;Bold;HBOK124-08;-  
 Lepidoptera;Nymphalidae;Erebia;Erebia pronoe;Switzerland;Bold;LEPAA243-16;-  
 Lepidoptera;Nymphalidae;Erebia;Erebia pronoe;Switzerland;Bold;LEPAA776-16;-  
 Lepidoptera;Nymphalidae;Erebia;Erebia styx;Switzerland;Bold;LEPAA778-16;-  
 Lepidoptera;Nymphalidae;Erebia;Erebia styx;Austria;Bold;HBOK154-08;-  
 Lepidoptera;Nymphalidae;Erebia;Erebia styx;Switzerland;Bold;LEPAA608-16;-  
 Lepidoptera;Nymphalidae;Erebia;Erebia styx;Austria;Bold;HBOK153-08;-  
 Lepidoptera;Nymphalidae;Erebia;Erebia triaria;Italy;Bold;LEATD014-13;-  
 Lepidoptera;Nymphalidae;Erebia;Erebia triaria;Italy;Bold;LEATD013-13;-  
 Lepidoptera;Nymphalidae;Erebia;Erebia tyndarus;Switzerland;Bold;LEPPA1197-17;-  
 Lepidoptera;Nymphalidae;Erebia;Erebia tyndarus;Switzerland;Bold;LEPAA113-16;-  
 Lepidoptera;Nymphalidae;Erebia;Erebia tyndarus;Switzerland;Bold;LEPPA1195-17;-  
 Lepidoptera;Hesperiidae;Erynnis;Erynnis tages;Switzerland;Bold;LEPAA523-16;-  
 Lepidoptera;Hesperiidae;Erynnis;Erynnis tages;Austria;Bold;PHLAI515-13;-  
 Lepidoptera;Hesperiidae;Erynnis;Erynnis tages;Switzerland;Bold;LEPAA418-16;-  
 Lepidoptera;Hesperiidae;Erynnis;Erynnis tages;Switzerland;Bold;LEPAA546-16;-  
 Lepidoptera;Hesperiidae;Erynnis;Erynnis tages;Switzerland;Bold;LEPAA292-16;-  
 Lepidoptera;Pieridae;Euchloe;Euchloe simplonia;Switzerland;Bold;LEPAA678-16;-  
 Lepidoptera;Lycaenidae;Eumedonia;Eumedonia eumedon;Switzerland;Bold;LEPAA117-16;-  
 Lepidoptera;Lycaenidae;Favonius;Favonius quercus;Austria;Bold;LEATI058-15;-  
 Lepidoptera;Lycaenidae;Favonius;Favonius quercus;Austria;Bold;LEATI059-15;-  
 Lepidoptera;Lycaenidae;Glaucopsyche;Glaucopsyche alexis;Austria;Bold;LEATI055-15;-  
 Lepidoptera;Lycaenidae;Glaucopsyche;Glaucopsyche alexis;Austria;Bold;LEATI056-15;-  
 Lepidoptera;Pieridae;Gonepteryx;Gonepteryx cleopatra;Greece;Bold;LON4614-16;-  
 Lepidoptera;Hesperiidae;Heteropterus;Heteropterus morpheus;Switzerland;Bold;LEPAA609-16;-  
 Lepidoptera;Hesperiidae;Heteropterus;Heteropterus morpheus;Austria;Bold;LEASS967-17;-  
 Lepidoptera;Nymphalidae;Hipparchia;Hipparchia fagi;Switzerland;Bold;LEPAA955-18;-  
 Lepidoptera;Nymphalidae;Hipparchia;Hipparchia fagi;Austria;Bold;LEATJ1320-16;-  
 Lepidoptera;Nymphalidae;Hipparchia;Hipparchia fagi;Italy;Bold;LEASX714-21;-  
 Lepidoptera;Nymphalidae;Hipparchia;Hipparchia fagi;Switzerland;Bold;LEPAA959-18;-  
 Lepidoptera;Nymphalidae;Hipparchia;Hipparchia fagi;Austria;Bold;LEASS985-17;-  
 Lepidoptera;Nymphalidae;Hipparchia;Hipparchia hermine;Norway;Bold;LON6144-17;-  
 Lepidoptera;Nymphalidae;Hipparchia;Hipparchia semele;Norway;Bold;LON6145-17;-  
 Lepidoptera;Nymphalidae;Hipparchia;Hipparchia semele;Denmark;Bold;LON913-12;-  
 Lepidoptera;Nymphalidae;Hipparchia;Hipparchia semele;Austria;Bold;LEASS987-17;-  
 Lepidoptera;Nymphalidae;Hipparchia;Hipparchia semele;Norway;Bold;LON6147-17;-  
 Lepidoptera;Nymphalidae;Hipparchia;Hipparchia semele;Norway;Bold;LON6146-17;-  
 Lepidoptera;Nymphalidae;Hipparchia;Hipparchia semele;Norway;Bold;LON6148-17;-  
 Lepidoptera;Nymphalidae;Hipparchia;Hipparchia semele;Norway;Bold;LON4636-16;-  
 Lepidoptera;Nymphalidae;Hipparchia;Hipparchia semele;Austria;Bold;LEASS902-17;-  
 Lepidoptera;Nymphalidae;Hipparchia;Hipparchia semele;Denmark;Bold;LON912-12;-  
 Lepidoptera;Nymphalidae;Hipparchia;Hipparchia semele;Austria;Bold;LEASS901-17;-  
 Lepidoptera;Nymphalidae;Hipparchia;Hipparchia statilinus;Austria;Bold;ABOLB166-15;-  
 Lepidoptera;Nymphalidae;Hyponephele;Hyponephele lycaon;Austria;Bold;LEASS899-17;-  
 Lepidoptera;Nymphalidae;Hyponephele;Hyponephele lycaon;Austria;Bold;LEASS900-17;-  
 Lepidoptera;Nymphalidae;Hyponephele;Hyponephele lycaon;Austria;Bold;LEASS976-17;-  
 Lepidoptera;Lycaenidae;Iolana;Iolana iolas;Switzerland;Bold;LEPAA775-16;-  
 Lepidoptera;Nymphalidae;Issoria;Issoria lathonia;Norway;Bold;LON5661-17;-  
 Lepidoptera;Nymphalidae;Issoria;Issoria lathonia;Norway;Bold;LON5662-17;-  
 Lepidoptera;Lycaenidae;Lampides;Lampides boeticus;Switzerland;Bold;LEPAA669-16;-  
 Lepidoptera;Lycaenidae;Lampides;Lampides boeticus;Greece;Bold;LON4616-16;-  
 Lepidoptera;Nymphalidae;Lasiommata;Lasiommata maera;Norway;Bold;LON4632-16;-  
 Lepidoptera;Nymphalidae;Lasiommata;Lasiommata megera;Italy;Bold;LEATD012-13;-  
 Lepidoptera;Pieridae;Leptidea;Leptidea juvernica;Switzerland;Bold;LEPPA1245-17;-  
 Lepidoptera;Pieridae;Leptidea;Leptidea juvernica;Switzerland;Bold;LEPAA558-16;-  
 Lepidoptera;Pieridae;Leptidea;Leptidea sinapis;Bosnia and Herzegovina;Bold;HBOK094-08;-  
 Lepidoptera;Pieridae;Leptidea;Leptidea sinapis;Switzerland;Bold;LEPPA1244-17;-  
 Lepidoptera;Pieridae;Leptidea;Leptidea sinapis;Switzerland;Bold;LEPAA827-16;-  
 Lepidoptera;Pieridae;Leptidea;Leptidea sinapis;Switzerland;Bold;LEPAA135-16;-  
 Lepidoptera;Pieridae;Leptidea;Leptidea sinapis;Switzerland;Bold;LEPAA383-16;-  
 Lepidoptera;Lycaenidae;Leptotes;Leptotes pirithous;Austria;Bold;LEASS918-17;-  
 Lepidoptera;Nymphalidae;Libythea;Libythea celtis;Italy;Bold;LEATG435-14;-  
 Lepidoptera;Nymphalidae;Libythea;Libythea celtis;Italy;Bold;LEATG436-14;-  
 Lepidoptera;Nymphalidae;Limenitis;Limenitis camilla;Austria;Bold;LEASS994-17;-  
 Lepidoptera;Nymphalidae;Limenitis;Limenitis populi;Italy;Bold;LEATH721-14;-  
 Lepidoptera;Nymphalidae;Limenitis;Limenitis populi;Austria;Bold;LEASS846-17;-

Lepidoptera;Nymphalidae;Limenitis;Limenitis populi;Austria;Bold;LEASS996-17;-  
 Lepidoptera;Nymphalidae;Limenitis;Limenitis populi;Austria;Bold;LEATI001-15;-  
 Lepidoptera;Nymphalidae;Limenitis;Limenitis populi;Austria;Bold;LEASS995-17;-  
 Lepidoptera;Nymphalidae;Lopinga;Lopinga achine;Austria;Bold;LEASS775-17;-  
 Lepidoptera;Nymphalidae;Lopinga;Lopinga achine;Austria;Bold;PHLAW024-13;-  
 Lepidoptera;Nymphalidae;Lopinga;Lopinga achine;Austria;Bold;LEASS505-17;-  
 Lepidoptera;Lycaenidae;Lycaena;Lycaena alciphron;Austria;Bold;LEASS546-17;-  
 Lepidoptera;Lycaenidae;Lycaena;Lycaena helle;Austria;Bold;LASTS097-14;-  
 Lepidoptera;Lycaenidae;Lycaena;Lycaena helle;Switzerland;Bold;LEPPA1241-17;-  
 Lepidoptera;Lycaenidae;Lycaena;Lycaena helle;Austria;Bold;LEASS509-17;-  
 Lepidoptera;Lycaenidae;Lycaena;Lycaena helle;Switzerland;Bold;LEPAA704-16;-  
 Lepidoptera;Lycaenidae;Lycaena;Lycaena hippothoe;Switzerland;Bold;LEPPA1205-17;-  
 Lepidoptera;Lycaenidae;Lycaena;Lycaena hippothoe;Switzerland;Bold;LEPAA683-16;-  
 Lepidoptera;Lycaenidae;Lycaena;Lycaena hippothoe;Sweden;Bold;LON5672-17;-  
 Lepidoptera;Lycaenidae;Lycaena;Lycaena phlaeas;Switzerland;Bold;LEPAA629-16;-  
 Lepidoptera;Lycaenidae;Lycaena;Lycaena phlaeas;Switzerland;Bold;LEPAA132-16;-  
 Lepidoptera;Lycaenidae;Lycaena;Lycaena phlaeas;Switzerland;Bold;LEPAA307-16;-  
 Lepidoptera;Lycaenidae;Lycaena;Lycaena tityrus;Switzerland;Bold;LEPAA836-16;-  
 Lepidoptera;Lycaenidae;Lycaena;Lycaena tityrus;Switzerland;Bold;LEPPA1228-17;-  
 Lepidoptera;Lycaenidae;Lycaena;Lycaena virgaureae;Switzerland;Bold;LEPAA515-16;-  
 Lepidoptera;Lycaenidae;Lycaena;Lycaena virgaureae;Switzerland;Bold;LEPAA675-16;-  
 Lepidoptera;Lycaenidae;Lycaena;Lycaena virgaureae;Switzerland;Bold;LEPAA889-16;-  
 Lepidoptera;Nymphalidae;Maniola;Maniola jurtina;Norway;Bold;LON6140-17;-  
 Lepidoptera;Nymphalidae;Maniola;Maniola jurtina;Norway;Bold;LON6826-18;-  
 Lepidoptera;Nymphalidae;Maniola;Maniola jurtina;Norway;Bold;LON6141-17;-  
 Lepidoptera;Nymphalidae;Maniola;Maniola jurtina;Switzerland;Bold;LEPAA142-16;-  
 Lepidoptera;Nymphalidae;Melanargia;Melanargia arge;Italy;Bold;VNMB553-08;-  
 Lepidoptera;Nymphalidae;Melitaea;Melitaea asteria;Switzerland;Bold;LEPAA808-16;-  
 Lepidoptera;Nymphalidae;Melitaea;Melitaea asteria;Switzerland;Bold;LEPPA1207-17;-  
 Lepidoptera;Nymphalidae;Melitaea;Melitaea asteria;Switzerland;Bold;LEPPA1208-17;-  
 Lepidoptera;Nymphalidae;Melitaea;Melitaea asteria;Switzerland;Bold;LEPAA648-16;-  
 Lepidoptera;Nymphalidae;Melitaea;Melitaea aurelia;Austria;Bold;LEASS881-17;-  
 Lepidoptera;Nymphalidae;Melitaea;Melitaea britomartis;Switzerland;Bold;LEPAA610-16;-  
 Lepidoptera;Nymphalidae;Melitaea;Melitaea britomartis;Austria;Bold;LEASS956-17;-  
 Lepidoptera;Nymphalidae;Melitaea;Melitaea britomartis;Austria;Bold;LEASS1015-17;-  
 Lepidoptera;Nymphalidae;Melitaea;Melitaea didyma;Austria;Bold;LEASS685-17;-  
 Lepidoptera;Nymphalidae;Melitaea;Melitaea didyma;Switzerland;Bold;LEPPA1200-17;-  
 Lepidoptera;Nymphalidae;Melitaea;Melitaea didyma;Switzerland;Bold;LEPAA108-16;-  
 Lepidoptera;Nymphalidae;Melitaea;Melitaea nevadensis;Switzerland;Bold;LEPPA1210-17;-  
 Lepidoptera;Nymphalidae;Melitaea;Melitaea nevadensis;Switzerland;Bold;LEPPA1214-17;-  
 Lepidoptera;Nymphalidae;Melitaea;Melitaea nevadensis;Switzerland;Bold;LEPPA1218-17;-  
 Lepidoptera;Nymphalidae;Melitaea;Melitaea nevadensis;Switzerland;Bold;LEPPA1219-17;-  
 Lepidoptera;Nymphalidae;Melitaea;Melitaea parthenoides;Austria;Bold;LEASS954-17;-  
 Lepidoptera;Nymphalidae;Melitaea;Melitaea trivia;Austria;Bold;LEATJ1324-16;-  
 Lepidoptera;Nymphalidae;Minois;Minois dryas;Austria;Bold;LEASS992-17;-  
 Lepidoptera;Nymphalidae;Neptis;Neptis rivularis;Austria;Bold;LEASS889-17;-  
 Lepidoptera;Nymphalidae;Neptis;Neptis sappho;Austria;Bold;LEASS988-17;-  
 Lepidoptera;Nymphalidae;Nymphalis;Nymphalis antiopa;Switzerland;Bold;LEPAA161-16;-  
 Lepidoptera;Nymphalidae;Nymphalis;Nymphalis antiopa;Italy;Bold;PHLAI552-13;-  
 Lepidoptera;Nymphalidae;Nymphalis;Nymphalis antiopa;Austria;Bold;PHLAI553-13;-  
 Lepidoptera;Nymphalidae;Nymphalis;Nymphalis polychloros;Italy;Bold;PHLAI495-13;-  
 Lepidoptera;Nymphalidae;Nymphalis;Nymphalis polychloros;Italy;Bold;PHLAI554-13;-  
 Lepidoptera;Nymphalidae;Pararge;Pararge aegeria;Switzerland;Bold;LEPAA160-16;-  
 Lepidoptera;Nymphalidae;Pararge;Pararge aegeria;Switzerland;Bold;LEPAA321-16;-  
 Lepidoptera;Papilionidae;Parnassius;Parnassius apollo;Switzerland;Bold;LEPAA283-16;-  
 Lepidoptera;Pieridae;Pieris;Pieris bryoniae;Switzerland;Bold;LEPAA829-16;-  
 Lepidoptera;Pieridae;Pieris;Pieris bryoniae;Switzerland;Bold;LEPAA865-16;-  
 Lepidoptera;Pieridae;Pieris;Pieris mannii;Italy;Bold;LEATG535-14;-  
 Lepidoptera;Pieridae;Pieris;Pieris mannii;Austria;Bold;ABOLD482-16;-  
 Lepidoptera;Pieridae;Pieris;Pieris mannii;Italy;Bold;LEATG534-14;-  
 Lepidoptera;Pieridae;Pieris;Pieris napi;Switzerland;Bold;LEPAA355-16;-  
 Lepidoptera;Pieridae;Pieris;Pieris napi;Denmark;Bold;LON915-12;-  
 Lepidoptera;Pieridae;Pieris;Pieris napi;Switzerland;Bold;LEPAA151-16;-  
 Lepidoptera;Pieridae;Pieris;Pieris napi;Switzerland;Bold;LEPAA320-16;-  
 Lepidoptera;Pieridae;Pieris;Pieris napi;Turkey;Bold;LON916-12;-  
 Lepidoptera;Pieridae;Pieris;Pieris rapae;Germany;Bold;AMTPC461-15;-  
 Lepidoptera;Lycaenidae;Plebejus;Plebejus argus;Italy;Bold;LEATG414-14;-  
 Lepidoptera;Lycaenidae;Plebejus;Plebejus argus;Switzerland;Bold;LEPAA574-16;-  
 Lepidoptera;Lycaenidae;Plebejus;Plebejus argus;Serbia;Bold;LYCAE463-15;-  
 Lepidoptera;Lycaenidae;Plebejus;Plebejus argus;Switzerland;Bold;LEPAA463-16;-  
 Lepidoptera;Lycaenidae;Plebejus;Plebejus idas;France;Bold;PHLAA429-09;-  
 Lepidoptera;Lycaenidae;Plebejus;Plebejus idas;Austria;Bold;PHLAI498-13;-  
 Lepidoptera;Nymphalidae;Polygonia;Polygonia c-album;Italy;Bold;LEATG475-14;-  
 Lepidoptera;Lycaenidae;Polyommatus;Polyommatus amandus;Norway;Bold;LON6191-17;-  
 Lepidoptera;Lycaenidae;Polyommatus;Polyommatus amandus;Norway;Bold;LON6192-17;-  
 Lepidoptera;Lycaenidae;Polyommatus;Polyommatus amandus;Switzerland;Bold;LEPAA646-16;-  
 Lepidoptera;Lycaenidae;Polyommatus;Polyommatus coridon;Romania;Bold;EZRMN400-09;-  
 Lepidoptera;Lycaenidae;Polyommatus;Polyommatus daphnis;Austria;Bold;LEASS678-17;-

Lepidoptera;Lycaenidae;Polyommatus;Polyommatus dorylas;Italy;Bold;LEATH740-14;-  
 Lepidoptera;Lycaenidae;Polyommatus;Polyommatus dorylas;Switzerland;Bold;LEPAA627-16;-  
 Lepidoptera;Lycaenidae;Polyommatus;Polyommatus dorylas;Austria;Bold;LEASS1039-17;-  
 Lepidoptera;Lycaenidae;Polyommatus;Polyommatus icarus;Austria;Bold;PHLAI496-13;-  
 Lepidoptera;Lycaenidae;Polyommatus;Polyommatus icarus;Switzerland;Bold;LEPAA811-16;-  
 Lepidoptera;Lycaenidae;Polyommatus;Polyommatus icarus;Switzerland;Bold;LEPAA412-16;-  
 Lepidoptera;Lycaenidae;Polyommatus;Polyommatus icarus;Netherlands;Bold;NLLEA1448-14;-  
 Lepidoptera;Pieridae;Pontia;Pontia daplidice;Austria;Bold;LEASS958-17;-  
 Lepidoptera;Pieridae;Pontia;Pontia edusa;Austria;Bold;LEASS866-17;-  
 Lepidoptera;Pieridae;Pontia;Pontia edusa;Austria;Bold;LEASS482-17;-  
 Lepidoptera;Pieridae;Pontia;Pontia edusa;Austria;Bold;LEASS867-17;-  
 Lepidoptera;Lycaenidae;Pseudophilotes;Pseudophilotes baton;Switzerland;Bold;LEPAA792-16;-  
 Lepidoptera;Lycaenidae;Pseudophilotes;Pseudophilotes vicrama;Austria;Bold;ABOLD479-16;-  
 Lepidoptera;Lycaenidae;Pseudophilotes;Pseudophilotes vicrama;Austria;Bold;LEASS968-17;-  
 Lepidoptera;Hesperiidae;Pyrgus;Pyrgus alveus;Norway;Bold;LON5689-17;-  
 Lepidoptera;Hesperiidae;Pyrgus;Pyrgus alveus;Switzerland;Bold;LEPAA754-16;-  
 Lepidoptera;Hesperiidae;Pyrgus;Pyrgus armoricanus;Austria;Bold;LEASS832-17;-  
 Lepidoptera;Hesperiidae;Pyrgus;Pyrgus armoricanus;Switzerland;Bold;LEPAA565-16;-  
 Lepidoptera;Hesperiidae;Pyrgus;Pyrgus armoricanus;Switzerland;Bold;LEPAA655-16;-  
 Lepidoptera;Hesperiidae;Pyrgus;Pyrgus armoricanus;Austria;Bold;LEASS922-17;-  
 Lepidoptera;Hesperiidae;Pyrgus;Pyrgus carlinae;Switzerland;Bold;LEPAA801-16;-  
 Lepidoptera;Hesperiidae;Pyrgus;Pyrgus carthami;Austria;Bold;LEASS751-17;-  
 Lepidoptera;Hesperiidae;Pyrgus;Pyrgus warrenensis;Switzerland;Bold;LEPAA805-16;-  
 Lepidoptera;Nymphalidae;Pyronia;Pyronia tithonus;Switzerland;Bold;LEPPA1180-17;-  
 Lepidoptera;Nymphalidae;Pyronia;Pyronia tithonus;Switzerland;Bold;LEPPA1179-17;-  
 Lepidoptera;Nymphalidae;Pyronia;Pyronia tithonus;Switzerland;Bold;LEPAA652-16;-  
 Lepidoptera;Lycaenidae;Satyrium;Satyrium acaciae;Austria;Bold;LEASS1029-17;-  
 Lepidoptera;Lycaenidae;Satyrium;Satyrium ilicis;Italy;Bold;LEATG394-14;-  
 Lepidoptera;Lycaenidae;Satyrium;Satyrium ilicis;Austria;Bold;LEASS1030-17;-  
 Lepidoptera;Lycaenidae;Satyrium;Satyrium ilicis;Switzerland;Bold;LEPAA794-16;-  
 Lepidoptera;Lycaenidae;Satyrium;Satyrium pruni;Austria;Bold;ABOLD644-17;-  
 Lepidoptera;Lycaenidae;Satyrium;Satyrium spini;Austria;Bold;LEASS1032-17;-  
 Lepidoptera;Lycaenidae;Satyrium;Satyrium spini;Switzerland;Bold;LEPAA795-16;-  
 Lepidoptera;Lycaenidae;Satyrium;Satyrium w-album;Switzerland;Bold;LEPAA706-16;-  
 Lepidoptera;Lycaenidae;Satyrium;Satyrium w-album;Switzerland;Bold;LEPAA862-16;-  
 Lepidoptera;Lycaenidae;Scolitantides;Scolitantides orion;Switzerland;Bold;LEPAA611-16;-  
 Lepidoptera;Lycaenidae;Scolitantides;Scolitantides orion;Switzerland;Bold;LEPAA166-16;-  
 Lepidoptera;Lycaenidae;Scolitantides;Scolitantides orion;Switzerland;Bold;LEPAA789-16;-  
 Lepidoptera;Hesperiidae;Spialia;Spialia sertorius;Austria;Bold;ABOLB167-15;-  
 Lepidoptera;Hesperiidae;Spialia;Spialia sertorius;Switzerland;Bold;LEPAA851-16;-  
 Lepidoptera;Hesperiidae;Spialia;Spialia sertorius;Italy;Bold;LEATG408-14;-  
 Lepidoptera;Lycaenidae;Thecla;Thecla betulae;Austria;Bold;LEASS550-17;-  
 Lepidoptera;Hesperiidae;Thymelicus;Thymelicus lineola;Austria;Bold;LEATJ1232-16;-  
 Lepidoptera;Hesperiidae;Thymelicus;Thymelicus lineola;Switzerland;Bold;LEPPA1236-17;-  
 Lepidoptera;Hesperiidae;Thymelicus;Thymelicus lineola;Switzerland;Bold;LEPAA545-16;-  
 Lepidoptera;Hesperiidae;Thymelicus;Thymelicus lineola;Netherlands;Bold;NLLEA1477-14;-  
 Lepidoptera;Hesperiidae;Thymelicus;Thymelicus sylvestris;Switzerland;Bold;LEPAA414-16;-  
 Lepidoptera;Hesperiidae;Thymelicus;Thymelicus sylvestris;Switzerland;Bold;LEPPA1240-17;-  
 Lepidoptera;Hesperiidae;Thymelicus;Thymelicus sylvestris;Switzerland;Bold;LEPPA1238-17;-  
 Lepidoptera;Hesperiidae;Thymelicus;Thymelicus sylvestris;Switzerland;Bold;LEPPA1239-17;-  
 Lepidoptera;Nymphalidae;Vanessa;Vanessa cardui;Italy;Bold;PHLAI557-13;-  
 Lepidoptera;Papilionidae;Zerynthia;Zerynthia polyxena;Austria;Bold;LEASS540-17;-  
 Odonata;Aeshnidae;Aeshna;Aeshna affinis;Italy;Bold;ZPLOD002-20;-  
 Odonata;Aeshnidae;Aeshna;Aeshna affinis;Italy;Bold;ZPLOD006-20;-  
 Odonata;Aeshnidae;Aeshna;Aeshna affinis;Italy;Bold;ZPLOD008-20;-  
 Odonata;Aeshnidae;Aeshna;Aeshna affinis;Italy;Bold;ZPLOD005-20;-  
 Odonata;Aeshnidae;Aeshna;Aeshna affinis;Italy;Bold;ZPLOD003-20;-  
 Odonata;Aeshnidae;Aeshna;Aeshna affinis;Italy;Bold;ZPLOD009-20;-  
 Odonata;Aeshnidae;Aeshna;Aeshna cyanea;Germany;Bold;FBAQU476-10;-  
 Odonata;Aeshnidae;Aeshna;Aeshna cyanea;Italy;Bold;ZPLOD011-20;-  
 Odonata;Aeshnidae;Aeshna;Aeshna cyanea;Italy;Bold;ZPLOD015-20;-  
 Odonata;Aeshnidae;Aeshna;Aeshna cyanea;Germany;Bold;FBAQU1602-13;-  
 Odonata;Aeshnidae;Aeshna;Aeshna cyanea;Germany;Bold;FBAQU1535-13;-  
 Odonata;Aeshnidae;Aeshna;Aeshna cyanea;Italy;Bold;ZPLOD014-20;-  
 Odonata;Aeshnidae;Aeshna;Aeshna cyanea;Germany;Bold;FBAQU1589-13;-  
 Odonata;Aeshnidae;Aeshna;Aeshna cyanea;Italy;Bold;ZPLOD013-20;-  
 Odonata;Aeshnidae;Aeshna;Aeshna cyanea;Germany;Bold;FBAQU477-10;-  
 Odonata;Aeshnidae;Aeshna;Aeshna cyanea;Italy;Bold;ZPLOD012-20;-  
 Odonata;Aeshnidae;Aeshna;Aeshna grandis;Germany;Bold;FBAQU1536-13;-  
 Odonata;Aeshnidae;Aeshna;Aeshna grandis;United Kingdom;Bold;ANBIO201-19;-  
 Odonata;Aeshnidae;Aeshna;Aeshna grandis;United Kingdom;Bold;DTNHM3378-21;-  
 Odonata;Aeshnidae;Aeshna;Aeshna juncea;Germany;Bold;FBAQU1538-13;-  
 Odonata;Aeshnidae;Aeshna;Aeshna juncea;Italy;Bold;ZPLOD027-20;-  
 Odonata;Aeshnidae;Aeshna;Aeshna juncea;Italy;Bold;ZPLOD029-20;-  
 Odonata;Aeshnidae;Aeshna;Aeshna juncea;Italy;Bold;ZPLOD031-20;-  
 Odonata;Aeshnidae;Aeshna;Aeshna juncea;Italy;Bold;ZPLOD032-20;-  
 Odonata;Aeshnidae;Aeshna;Aeshna mixta;Germany;Bold;FBAQU1539-13;-  
 Odonata;Aeshnidae;Aeshna;Aeshna mixta;Italy;Bold;ZPLOD035-20;-

Odonata;Aeshnidae;Aeshna;Aeshna mixta;Italy;Bold;ZPLOD037-20;-  
 Odonata;Aeshnidae;Aeshna;Aeshna mixta;Austria;Bold;FBAQU1564-13;-  
 Odonata;Aeshnidae;Aeshna;Aeshna mixta;Italy;Bold;ZPLOD036-20;-  
 Odonata;Aeshnidae;Aeshna;Aeshna subarctica;Italy;Bold;ZPLOD039-20;-  
 Odonata;Aeshnidae;Anax;Anax ephippiger;Italy;Bold;ZPLOD043-20;-  
 Odonata;Aeshnidae;Anax;Anax imperator;Italy;Bold;ZPLOD047-20;-  
 Odonata;Aeshnidae;Anax;Anax imperator;Italy;Bold;ZPLOD054-20;-  
 Odonata;Aeshnidae;Anax;Anax imperator;Italy;Bold;ZPLOD055-20;-  
 Odonata;Aeshnidae;Anax;Anax imperator;Italy;Bold;ZPLOD052-20;-  
 Odonata;Aeshnidae;Anax;Anax imperator;Germany;Bold;FBAQU1540-13;-  
 Odonata;Aeshnidae;Anax;Anax imperator;United Kingdom;Bold;DTNHM3008-21;-  
 Odonata;Aeshnidae;Anax;Anax imperator;Italy;Bold;ZPLOD050-20;-  
 Odonata;Aeshnidae;Anax;Anax parthenope;Italy;Bold;ZPLOD059-20;-  
 Odonata;Aeshnidae;Anax;Anax parthenope;Italy;Bold;ZPLOD061-20;-  
 Odonata;Aeshnidae;Boyeria;Boyeria irene;Italy;Bold;ZPLOD067-20;-  
 Odonata;Aeshnidae;Boyeria;Boyeria irene;Italy;Bold;ZPLOD064-20;-  
 Odonata;Aeshnidae;Boyeria;Boyeria irene;Italy;Bold;ZPLOD069-20;-  
 Odonata;Aeshnidae;Boyeria;Boyeria irene;Italy;Bold;ZPLOD065-20;-  
 Odonata;Aeshnidae;Boyeria;Boyeria irene;Italy;Bold;ZPLOD071-20;-  
 Odonata;Libellulidae;Brachythemis;Brachythemis impartita;Italy;Bold;ZPLOD077-20;-  
 Odonata;Libellulidae;Brachythemis;Brachythemis impartita;Italy;Bold;ZPLOD074-20;-  
 Odonata;Libellulidae;Brachythemis;Brachythemis impartita;Italy;Bold;ZPLOD076-20;-  
 Odonata;Aeshnidae;Brachytron;Brachytron pratense;United Kingdom;Bold;DTNHM663-21;-  
 Odonata;Aeshnidae;Brachytron;Brachytron pratense;Germany;Bold;FBAQU1541-13;-  
 Odonata;Aeshnidae;Brachytron;Brachytron pratense;Italy;Bold;ZPLOD080-20;-  
 Odonata;Calopterygidae;Calopteryx;Calopteryx haemorrhoidalis;Italy;Bold;ZPLOD092-20;-  
 Odonata;Calopterygidae;Calopteryx;Calopteryx haemorrhoidalis;Italy;Bold;ZPLOD094-20;-  
 Odonata;Calopterygidae;Calopteryx;Calopteryx haemorrhoidalis;Italy;Bold;ZPLOD089-20;-  
 Odonata;Calopterygidae;Calopteryx;Calopteryx haemorrhoidalis;Italy;Bold;ZPLOD097-20;-  
 Odonata;Calopterygidae;Calopteryx;Calopteryx haemorrhoidalis;Italy;Bold;ZPLOD093-20;-  
 Odonata;Calopterygidae;Calopteryx;Calopteryx haemorrhoidalis;Italy;Bold;ZPLOD088-20;-  
 Odonata;Calopterygidae;Calopteryx;Calopteryx haemorrhoidalis;Italy;Bold;ZPLOD087-20;-  
 Odonata;Calopterygidae;Calopteryx;Calopteryx haemorrhoidalis;Italy;Bold;ZPLOD099-20;-  
 Odonata;Calopterygidae;Calopteryx;Calopteryx haemorrhoidalis;Italy;Bold;ZPLOD100-20;-  
 Odonata;Calopterygidae;Calopteryx;Calopteryx haemorrhoidalis;Italy;Bold;ZPLOD090-20;-  
 Odonata;Calopterygidae;Calopteryx;Calopteryx splendens;Italy;Bold;ZPLOD111-20;-  
 Odonata;Calopterygidae;Calopteryx;Calopteryx splendens;Germany;Bold;FBAQU1582-13;-  
 Odonata;Calopterygidae;Calopteryx;Calopteryx splendens;Germany;Bold;FBAQU1600-13;-  
 Odonata;Calopterygidae;Calopteryx;Calopteryx splendens;Germany;Bold;FBAQU309-09;-  
 Odonata;Calopterygidae;Calopteryx;Calopteryx splendens;Germany;Bold;FBAQU524-10;-  
 Odonata;Calopterygidae;Calopteryx;Calopteryx splendens;Germany;Bold;FBAQU523-10;-  
 Odonata;Calopterygidae;Calopteryx;Calopteryx splendens;United Kingdom;Bold;DTNHM2510-21;-  
 Odonata;Calopterygidae;Calopteryx;Calopteryx splendens;Germany;Bold;FBAQU482-10;-  
 Odonata;Calopterygidae;Calopteryx;Calopteryx splendens;Italy;Bold;ZPLOD112-20;-  
 Odonata;Calopterygidae;Calopteryx;Calopteryx splendens;Italy;Bold;ZPLOD109-20;-  
 Odonata;Calopterygidae;Calopteryx;Calopteryx splendens;Italy;Bold;ZPLOD108-20;-  
 Odonata;Calopterygidae;Calopteryx;Calopteryx splendens;Germany;Bold;FBAQU1521-13;-  
 Odonata;Calopterygidae;Calopteryx;Calopteryx splendens;Italy;Bold;ZPLOD106-20;-  
 Odonata;Calopterygidae;Calopteryx;Calopteryx splendens;Italy;Bold;ZPLOD104-20;-  
 Odonata;Calopterygidae;Calopteryx;Calopteryx splendens;Germany;Bold;FBAQU122-09;-  
 Odonata;Calopterygidae;Calopteryx;Calopteryx splendens;Italy;Bold;ZPLOD107-20;-  
 Odonata;Calopterygidae;Calopteryx;Calopteryx splendens;Italy;Bold;ZPLOD105-20;-  
 Odonata;Calopterygidae;Calopteryx;Calopteryx splendens;Italy;Bold;ZPLOD101-20;-  
 Odonata;Calopterygidae;Calopteryx;Calopteryx virgo;Italy;Bold;ZPLOD121-20;-  
 Odonata;Calopterygidae;Calopteryx;Calopteryx virgo;Germany;Bold;FBAQU483-10;-  
 Odonata;Calopterygidae;Calopteryx;Calopteryx virgo;United Kingdom;Bold;DTNHM3773-21;-  
 Odonata;Calopterygidae;Calopteryx;Calopteryx virgo;Italy;Bold;ZPLOD120-20;-  
 Odonata;Calopterygidae;Calopteryx;Calopteryx virgo;Italy;Bold;ZPLOD122-20;-  
 Odonata;Calopterygidae;Calopteryx;Calopteryx virgo;Italy;Bold;ZPLOD116-20;-  
 Odonata;Calopterygidae;Calopteryx;Calopteryx virgo;Germany;Bold;FBAQU525-10;-  
 Odonata;Calopterygidae;Calopteryx;Calopteryx virgo;Germany;Bold;FBAQU1522-13;-  
 Odonata;Calopterygidae;Calopteryx;Calopteryx virgo;Italy;Bold;ZPLOD118-20;-  
 Odonata;Calopterygidae;Calopteryx;Calopteryx xanthostoma;Italy;Bold;ZPLOD126-20;-  
 Odonata;Coenagrionidae;Ceriagrion;Ceriagrion tenellum;Italy;Bold;ZPLOD132-20;-  
 Odonata;Coenagrionidae;Ceriagrion;Ceriagrion tenellum;Italy;Bold;ZPLOD133-20;-  
 Odonata;Coenagrionidae;Ceriagrion;Ceriagrion tenellum;Italy;Bold;ZPLOD139-20;-  
 Odonata;Coenagrionidae;Ceriagrion;Ceriagrion tenellum;Italy;Bold;ZPLOD137-20;-  
 Odonata;Coenagrionidae;Ceriagrion;Ceriagrion tenellum;Italy;Bold;ZPLOD131-20;-  
 Odonata;Coenagrionidae;Ceriagrion;Ceriagrion tenellum;Italy;Bold;ZPLOD128-20;-  
 Odonata;Coenagrionidae;Ceriagrion;Ceriagrion tenellum;Italy;Bold;ZPLOD136-20;-  
 Odonata;Lestidae;Chalcolestes;Chalcolestes parvidens;Italy;Bold;ZPLOD144-20;-  
 Odonata;Lestidae;Chalcolestes;Chalcolestes parvidens;Italy;Bold;ZPLOD145-20;-  
 Odonata;Lestidae;Chalcolestes;Chalcolestes parvidens;Italy;Bold;ZPLOD146-20;-  
 Odonata;Lestidae;Chalcolestes;Chalcolestes viridis;Germany;Bold;FBAQU498-10;-  
 Odonata;Lestidae;Chalcolestes;Chalcolestes viridis;Italy;Bold;ZPLOD176-20;-  
 Odonata;Lestidae;Chalcolestes;Chalcolestes viridis;Italy;Bold;ZPLOD161-20;-  
 Odonata;Lestidae;Chalcolestes;Chalcolestes viridis;Italy;Bold;ZPLOD184-20;-  
 Odonata;Lestidae;Chalcolestes;Chalcolestes viridis;Italy;Bold;ZPLOD170-20;-

[illegible]

[illegible]



Odonata;Coenagrionidae;Ischnura;Ischnura elegans;Italy;Bold;ZPLOD441-20;-  
 Odonata;Coenagrionidae;Ischnura;Ischnura elegans;Italy;Bold;ZPLOD448-20;-  
 Odonata;Coenagrionidae;Ischnura;Ischnura elegans;Italy;Bold;ZPLOD439-20;-  
 Odonata;Coenagrionidae;Ischnura;Ischnura genei;Italy;Bold;ZPLOD456-20;-  
 Odonata;Coenagrionidae;Ischnura;Ischnura genei;Italy;Bold;ZPLOD450-20;-  
 Odonata;Coenagrionidae;Ischnura;Ischnura genei;Italy;Bold;ZPLOD451-20;-  
 Odonata;Coenagrionidae;Ischnura;Ischnura genei;Italy;Bold;ZPLOD458-20;-  
 Odonata;Coenagrionidae;Ischnura;Ischnura genei;Italy;Bold;ZPLOD453-20;-  
 Odonata;Coenagrionidae;Ischnura;Ischnura genei;Italy;Bold;ZPLOD455-20;-  
 Odonata;Coenagrionidae;Ischnura;Ischnura pumilio;Italy;Bold;ZPLOD465-20;-  
 Odonata;Coenagrionidae;Ischnura;Ischnura pumilio;Italy;Bold;ZPLOD464-20;-  
 Odonata;Coenagrionidae;Ischnura;Ischnura pumilio;Italy;Bold;ZPLOD463-20;-  
 Odonata;Coenagrionidae;Ischnura;Ischnura pumilio;Italy;Bold;ZPLOD459-20;-  
 Odonata;Lestidae;Lestes;Lestes barbarus;Italy;Bold;ZPLOD473-20;-  
 Odonata;Lestidae;Lestes;Lestes barbarus;Germany;Bold;FBAQU316-09;-  
 Odonata;Lestidae;Lestes;Lestes barbarus;Italy;Bold;ZPLOD471-20;-  
 Odonata;Lestidae;Lestes;Lestes barbarus;Italy;Bold;ZPLOD469-20;-  
 Odonata;Lestidae;Lestes;Lestes barbarus;Germany;Bold;FBAQU173-09;-  
 Odonata;Lestidae;Lestes;Lestes barbarus;Italy;Bold;ZPLOD470-20;-  
 Odonata;Lestidae;Lestes;Lestes barbarus;Italy;Bold;ZPLOD477-20;-  
 Odonata;Lestidae;Lestes;Lestes barbarus;Italy;Bold;ZPLOD467-20;-  
 Odonata;Lestidae;Lestes;Lestes barbarus;Italy;Bold;ZPLOD472-20;-  
 Odonata;Lestidae;Lestes;Lestes barbarus;Romania;Bold;RODI024-20;-  
 Odonata;Lestidae;Lestes;Lestes dryas;Italy;Bold;ZPLOD479-20;-  
 Odonata;Lestidae;Lestes;Lestes dryas;Italy;Bold;ZPLOD483-20;-  
 Odonata;Lestidae;Lestes;Lestes dryas;Italy;Bold;ZPLOD480-20;-  
 Odonata;Lestidae;Lestes;Lestes dryas;Italy;Bold;ZPLOD487-20;-  
 Odonata;Lestidae;Lestes;Lestes macrostigma;Italy;Bold;ZPLOD490-20;-  
 Odonata;Lestidae;Lestes;Lestes macrostigma;Italy;Bold;ZPLOD489-20;-  
 Odonata;Lestidae;Lestes;Lestes sponsa;Italy;Bold;ZPLOD493-20;-  
 Odonata;Lestidae;Lestes;Lestes sponsa;Germany;Bold;FBAQU317-09;-  
 Odonata;Lestidae;Lestes;Lestes sponsa;Italy;Bold;ZPLOD495-20;-  
 Odonata;Lestidae;Lestes;Lestes sponsa;Germany;Bold;FBAQU539-10;-  
 Odonata;Lestidae;Lestes;Lestes sponsa;Italy;Bold;ZPLOD494-20;-  
 Odonata;Lestidae;Lestes;Lestes sponsa;Germany;Bold;FBAQU102-09;-  
 Odonata;Lestidae;Lestes;Lestes sponsa;Italy;Bold;ZPLOD497-20;-  
 Odonata;Lestidae;Lestes;Lestes sponsa;Italy;Bold;ZPLOD498-20;-  
 Odonata;Lestidae;Lestes;Lestes sponsa;Germany;Bold;FBAQU1525-13;-  
 Odonata;Lestidae;Lestes;Lestes sponsa;Germany;Bold;FBAQU497-10;-  
 Odonata;Lestidae;Lestes;Lestes virens;Germany;Bold;FBAQU174-09;-  
 Odonata;Lestidae;Lestes;Lestes virens;Italy;Bold;ZPLOD511-20;-  
 Odonata;Lestidae;Lestes;Lestes virens;Germany;Bold;FBAQU1526-13;-  
 Odonata;Lestidae;Lestes;Lestes virens;Italy;Bold;ZPLOD510-20;-  
 Odonata;Lestidae;Lestes;Lestes virens;Italy;Bold;ZPLOD507-20;-  
 Odonata;Lestidae;Lestes;Lestes virens;Germany;Bold;FBAQU540-10;-  
 Odonata;Lestidae;Lestes;Lestes virens;Italy;Bold;ZPLOD502-20;-  
 Odonata;Lestidae;Lestes;Lestes virens;Italy;Bold;ZPLOD508-20;-  
 Odonata;Lestidae;Lestes;Lestes virens;Italy;Bold;ZPLOD506-20;-  
 Odonata;Libellulidae;Leucorrhinia;Leucorrhinia dubia;Italy;Bold;ZPLOD514-20;-  
 Odonata;Libellulidae;Leucorrhinia;Leucorrhinia dubia;Italy;Bold;ZPLOD513-20;-  
 Odonata;Libellulidae;Leucorrhinia;Leucorrhinia dubia;Italy;Bold;ZPLOD516-20;-  
 Odonata;Libellulidae;Leucorrhinia;Leucorrhinia dubia;Germany;Bold;FBAQU1549-13;-  
 Odonata;Libellulidae;Leucorrhinia;Leucorrhinia dubia;Germany;Bold;FBAQU567-10;-  
 Odonata;Libellulidae;Leucorrhinia;Leucorrhinia dubia;Italy;Bold;ZPLOD521-20;-  
 Odonata;Libellulidae;Leucorrhinia;Leucorrhinia dubia;Italy;Bold;ZPLOD517-20;-  
 Odonata;Libellulidae;Leucorrhinia;Leucorrhinia dubia;Italy;Bold;ZPLOD518-20;-  
 Odonata;Libellulidae;Leucorrhinia;Leucorrhinia dubia;Italy;Bold;ZPLOD519-20;-  
 Odonata;Libellulidae;Libellula;Libellula depressa;Italy;Bold;ZPLOD525-20;-  
 Odonata;Libellulidae;Libellula;Libellula depressa;Italy;Bold;ZPLOD532-20;-  
 Odonata;Libellulidae;Libellula;Libellula depressa;Italy;Bold;ZPLOD529-20;-  
 Odonata;Libellulidae;Libellula;Libellula depressa;Italy;Bold;ZPLOD530-20;-  
 Odonata;Libellulidae;Libellula;Libellula depressa;Italy;Bold;ZPLOD533-20;-  
 Odonata;Libellulidae;Libellula;Libellula fulva;Italy;Bold;ZPLOD542-20;-  
 Odonata;Libellulidae;Libellula;Libellula fulva;Italy;Bold;ZPLOD539-20;-  
 Odonata;Libellulidae;Libellula;Libellula fulva;Italy;Bold;ZPLOD537-20;-  
 Odonata;Libellulidae;Libellula;Libellula fulva;Italy;Bold;ZPLOD540-20;-  
 Odonata;Libellulidae;Libellula;Libellula fulva;Italy;Bold;ZPLOD538-20;-  
 Odonata;Libellulidae;Libellula;Libellula quadrimaculata;United Kingdom;Bold;ANBIO194-19;-  
 Odonata;Libellulidae;Libellula;Libellula quadrimaculata;Germany;Bold;FBAQU318-09;-  
 Odonata;Libellulidae;Libellula;Libellula quadrimaculata;Germany;Bold;FBAQU1547-13;-  
 Odonata;Libellulidae;Libellula;Libellula quadrimaculata;Italy;Bold;ZPLOD548-20;-  
 Odonata;Libellulidae;Libellula;Libellula quadrimaculata;Italy;Bold;ZPLOD546-20;-  
 Odonata;Libellulidae;Libellula;Libellula quadrimaculata;Germany;Bold;FBAQU1511-13;-  
 Odonata;Gomphidae;Lindenia;Lindenia tetraphylla;Italy;Bold;ZPLOD551-20;-  
 Odonata;Gomphidae;Lindenia;Lindenia tetraphylla;Italy;Bold;ZPLOD554-20;-  
 Odonata;Coenagrionidae;Nehalennia;Nehalennia speciosa;Italy;Bold;ZPLOD559-20;-  
 Odonata;Coenagrionidae;Nehalennia;Nehalennia speciosa;Italy;Bold;ZPLOD558-20;-  
 Odonata;Gomphidae;Onychogomphus;Onychogomphus uncatus;Italy;Bold;ZPLOD584-20;-

[illegible]

Odonata;Coenagrionidae;Pyrrhosoma;Pyrrhosoma nymphula;Germany;Bold;FBAQU1554-13;-  
 Odonata;Libellulidae;Selysiothemis;Selysiothemis nigra;Italy;Bold;ZPLOT702-20;-  
 Odonata;Libellulidae;Selysiothemis;Selysiothemis nigra;Italy;Bold;ZPLOT704-20;-  
 Odonata;Libellulidae;Selysiothemis;Selysiothemis nigra;Italy;Bold;ZPLOT699-20;-  
 Odonata;Corduliidae;Somatochlora;Somatochlora alpestris;Italy;Bold;ZPLOT705-20;-  
 Odonata;Corduliidae;Somatochlora;Somatochlora alpestris;Italy;Bold;ZPLOT708-20;-  
 Odonata;Corduliidae;Somatochlora;Somatochlora arctica;Italy;Bold;ZPLOT711-20;-  
 Odonata;Corduliidae;Somatochlora;Somatochlora flavomaculata;Italy;Bold;ZPLOT716-20;-  
 Odonata;Corduliidae;Somatochlora;Somatochlora flavomaculata;Germany;Bold;FBAQU1434-13;-  
 Odonata;Corduliidae;Somatochlora;Somatochlora flavomaculata;Germany;Bold;FBAQU1545-13;-  
 Odonata;Corduliidae;Somatochlora;Somatochlora flavomaculata;Romania;Bold;RODI023-20;-  
 Odonata;Corduliidae;Somatochlora;Somatochlora flavomaculata;Italy;Bold;ZPLOT714-20;-  
 Odonata;Corduliidae;Somatochlora;Somatochlora flavomaculata;Italy;Bold;ZPLOT719-20;-  
 Odonata;Corduliidae;Somatochlora;Somatochlora flavomaculata;Germany;Bold;FBAQU512-10;-  
 Odonata;Corduliidae;Somatochlora;Somatochlora metallica;Germany;Bold;FBAQU1435-13;-  
 Odonata;Corduliidae;Somatochlora;Somatochlora metallica;Germany;Bold;FBAQU549-10;-  
 Odonata;Corduliidae;Somatochlora;Somatochlora metallica;Germany;Bold;FBAQU514-10;-  
 Odonata;Corduliidae;Somatochlora;Somatochlora metallica;Italy;Bold;ZPLOT732-20;-  
 Odonata;Corduliidae;Somatochlora;Somatochlora metallica;Germany;Bold;FBAQU1546-13;-  
 Odonata;Corduliidae;Somatochlora;Somatochlora metallica;Germany;Bold;FBAQU513-10;-  
 Odonata;Corduliidae;Somatochlora;Somatochlora metallica;Germany;Bold;FBAQU1604-13;-  
 Odonata;Corduliidae;Somatochlora;Somatochlora metallica;Germany;Bold;FBAQU1594-13;-  
 Odonata;Corduliidae;Somatochlora;Somatochlora metallica;Germany;Bold;FBAQU1587-13;-  
 Odonata;Lestidae;Sympecma;Sympecma fusca;Czech Republic;Bold;FBAQU1565-13;-  
 Odonata;Lestidae;Sympecma;Sympecma fusca;Germany;Bold;FBAQU1566-13;-  
 Odonata;Lestidae;Sympecma;Sympecma fusca;Austria;Bold;FBAQU1561-13;-  
 Odonata;Lestidae;Sympecma;Sympecma fusca;Germany;Bold;FBAQU1598-13;-  
 Odonata;Lestidae;Sympecma;Sympecma fusca;Italy;Bold;ZPLOT743-20;-  
 Odonata;Lestidae;Sympecma;Sympecma fusca;Italy;Bold;ZPLOT736-20;-  
 Odonata;Lestidae;Sympecma;Sympecma fusca;Italy;Bold;ZPLOT738-20;-  
 Odonata;Lestidae;Sympecma;Sympecma paedisca;Germany;Bold;FBAQU1567-13;-  
 Odonata;Lestidae;Sympecma;Sympecma paedisca;Germany;Bold;FBAQU1523-13;-  
 Odonata;Lestidae;Sympecma;Sympecma paedisca;Czech Republic;Bold;FBAQU1570-13;-  
 Odonata;Lestidae;Sympecma;Sympecma paedisca;Czech Republic;Bold;FBAQU1571-13;-  
 Odonata;Lestidae;Sympecma;Sympecma paedisca;Lithuania;Bold;FBAQU1574-13;-  
 Odonata;Lestidae;Sympecma;Sympecma paedisca;Czech Republic;Bold;FBAQU1568-13;-  
 Odonata;Lestidae;Sympecma;Sympecma paedisca;Lithuania;Bold;FBAQU1572-13;-  
 Odonata;Lestidae;Sympecma;Sympecma paedisca;Lithuania;Bold;FBAQU1573-13;-  
 Odonata;Libellulidae;Sympetrum;Sympetrum danae;Italy;Bold;ZPLOT747-20;-  
 Odonata;Libellulidae;Sympetrum;Sympetrum danae;Germany;Bold;FBAQU550-10;-  
 Odonata;Libellulidae;Sympetrum;Sympetrum danae;Germany;Bold;FBAQU1550-13;-  
 Odonata;Libellulidae;Sympetrum;Sympetrum depressiusculum;Italy;Bold;ZPLOT750-20;-  
 Odonata;Libellulidae;Sympetrum;Sympetrum depressiusculum;Italy;Bold;ZPLOT751-20;-  
 Odonata;Libellulidae;Sympetrum;Sympetrum depressiusculum;Germany;Bold;FBAQU551-10;-  
 Odonata;Libellulidae;Sympetrum;Sympetrum flaveolum;Italy;Bold;ZPLOT756-20;-  
 Odonata;Libellulidae;Sympetrum;Sympetrum flaveolum;Italy;Bold;ZPLOT754-20;-  
 Odonata;Libellulidae;Sympetrum;Sympetrum flaveolum;Italy;Bold;ZPLOT759-20;-  
 Odonata;Libellulidae;Sympetrum;Sympetrum flaveolum;Italy;Bold;ZPLOT755-20;-  
 Odonata;Libellulidae;Sympetrum;Sympetrum fonscolombii;Italy;Bold;ZPLOT765-20;-  
 Odonata;Libellulidae;Sympetrum;Sympetrum fonscolombii;Italy;Bold;ZPLOT769-20;-  
 Odonata;Libellulidae;Sympetrum;Sympetrum fonscolombii;Italy;Bold;ZPLOT767-20;-  
 Odonata;Libellulidae;Sympetrum;Sympetrum fonscolombii;Italy;Bold;ZPLOT771-20;-  
 Odonata;Libellulidae;Sympetrum;Sympetrum fonscolombii;Italy;Bold;ZPLOT761-20;-  
 Odonata;Libellulidae;Sympetrum;Sympetrum fonscolombii;Italy;Bold;ZPLOT770-20;-  
 Odonata;Libellulidae;Sympetrum;Sympetrum fonscolombii;Italy;Bold;ZPLOT766-20;-  
 Odonata;Libellulidae;Sympetrum;Sympetrum fonscolombii;Italy;Bold;ZPLOT764-20;-  
 Odonata;Libellulidae;Sympetrum;Sympetrum meridionale;Austria;Bold;FBAQU1560-13;-  
 Odonata;Libellulidae;Sympetrum;Sympetrum meridionale;Italy;Bold;ZPLOT774-20;-  
 Odonata;Libellulidae;Sympetrum;Sympetrum meridionale;Italy;Bold;ZPLOT773-20;-  
 Odonata;Libellulidae;Sympetrum;Sympetrum meridionale;Italy;Bold;ZPLOT775-20;-  
 Odonata;Libellulidae;Sympetrum;Sympetrum pedemontanum;Italy;Bold;ZPLOT782-20;-  
 Odonata;Libellulidae;Sympetrum;Sympetrum pedemontanum;Italy;Bold;ZPLOT778-20;-  
 Odonata;Libellulidae;Sympetrum;Sympetrum pedemontanum;Italy;Bold;ZPLOT780-20;-  
 Odonata;Libellulidae;Sympetrum;Sympetrum sanguineum;Austria;Bold;FBAQU1559-13;-  
 Odonata;Libellulidae;Sympetrum;Sympetrum sanguineum;Austria;Bold;FBAQU1557-13;-  
 Odonata;Libellulidae;Sympetrum;Sympetrum sanguineum;Italy;Bold;ZPLOT788-20;-  
 Odonata;Libellulidae;Sympetrum;Sympetrum sanguineum;Italy;Bold;ZPLOT789-20;-  
 Odonata;Libellulidae;Sympetrum;Sympetrum sanguineum;Italy;Bold;ZPLOT784-20;-  
 Odonata;Libellulidae;Sympetrum;Sympetrum sanguineum;Italy;Bold;ZPLOT787-20;-  
 Odonata;Libellulidae;Sympetrum;Sympetrum sanguineum;Italy;Bold;ZPLOT792-20;-  
 Odonata;Libellulidae;Sympetrum;Sympetrum sanguineum;Italy;Bold;ZPLOT785-20;-  
 Odonata;Libellulidae;Sympetrum;Sympetrum sanguineum;Italy;Bold;ZPLOT791-20;-  
 Odonata;Libellulidae;Sympetrum;Sympetrum striolatum;Italy;Bold;ZPLOT801-20;-  
 Odonata;Libellulidae;Sympetrum;Sympetrum striolatum;Italy;Bold;ZPLOT798-20;-  
 Odonata;Libellulidae;Sympetrum;Sympetrum striolatum;Italy;Bold;ZPLOT796-20;-  
 Odonata;Libellulidae;Sympetrum;Sympetrum vulgatum;Austria;Bold;FBAQU1558-13;-  
 Odonata;Libellulidae;Sympetrum;Sympetrum vulgatum;Germany;Bold;FBAQU1551-13;-  
 Odonata;Libellulidae;Trithemis;Trithemis annulata;Italy;Bold;ZPLOT810-20;-

Odonata;Libellulidae;Trithemis;Trithemis annulata;Italy;Bold;ZPLOC807-20;-  
 Odonata;Libellulidae;Trithemis;Trithemis annulata;Italy;Bold;ZPLOC808-20;-  
 Odonata;Libellulidae;Trithemis;Trithemis annulata;Italy;Bold;ZPLOC806-20;-  
 Coleoptera;Melandryidae;Abdera;Abdera bifasciata;France;Bold;PSFOR262-13;-  
 Coleoptera;Melandryidae;Abdera;Abdera biflexuosa;United Kingdom;Bold;UKAN462-22;-  
 Coleoptera;Melandryidae;Abdera;Abdera flexuosa;France;Bold;PSFOR263-13;-  
 Coleoptera;Melandryidae;Abdera;Abdera quadrifasciata;France;Bold;PSFOR1016-14;-  
 Coleoptera;Melandryidae;Abdera;Abdera quadrifasciata;France;Bold;PSFOR362-13;-  
 Coleoptera;Buprestidae;Acmaeodera;Acmaeodera cylindrica;France;Bold;PSFOR1107-17;-  
 Coleoptera;Buprestidae;Acmaeodera;Acmaeodera degener;France;Bold;PSFOR572-13;-  
 Coleoptera;Buprestidae;Acmaeoderella;Acmaeoderella adspersula;France;Bold;PSFOR574-13;-  
 Coleoptera;Buprestidae;Acmaeoderella;Acmaeoderella flavofasciata;France;Bold;PSFOR575-13;-  
 Coleoptera;Cerambycidae;Acmaeops;Acmaeops septentrionis;Poland;Bold;PSFOR100-13;-  
 Coleoptera;Cerambycidae;Aegomorphus;Aegomorphus clavipes;Finland;Bold;COLFEL65-12;-  
 Coleoptera;Cerambycidae;Aegomorphus;Aegomorphus clavipes;Russia;Bold;VVGPL2857-15;-  
 Coleoptera;Cerambycidae;Aegomorphus;Aegomorphus clavipes;Finland;Bold;COLFF143-13;-  
 Coleoptera;Cerambycidae;Aegomorphus;Aegomorphus clavipes;Finland;Bold;COLFD840-12;-  
 Coleoptera;Leiodidae;Agathidium;Agathidium seminulum;Finland;Bold;COLFEL1031-13;-  
 Coleoptera;Leiodidae;Agathidium;Agathidium seminulum;Finland;Bold;COLFEL1030-13;-  
 Coleoptera;Buprestidae;Agrilus;Agrilus laticornis;Austria;Bold;TDAAT984-20;-  
 Coleoptera;Buprestidae;Agrilus;Agrilus sulcicollis;Finland;Bold;COLFA221-10;-  
 Coleoptera;Buprestidae;Agrilus;Agrilus viridis;Finland;Bold;COLFA196-10;-  
 Coleoptera;Buprestidae;Agrilus;Agrilus viridis;Finland;Bold;COLFA229-10;-  
 Coleoptera;Buprestidae;Agrilus;Agrilus viridis;Finland;Bold;COLFA193-10;-  
 Coleoptera;Buprestidae;Agrilus;Agrilus viridis;Finland;Bold;COLFA239-10;-  
 Coleoptera;Buprestidae;Agrilus;Agrilus viridis;Finland;Bold;COLFA231-10;-  
 Coleoptera;Buprestidae;Agrilus;Agrilus viridis;Finland;Bold;COLFA234-10;-  
 Coleoptera;Buprestidae;Agrilus;Agrilus viridis;Finland;Bold;COLFA232-10;-  
 Coleoptera;Tenebrionidae;Allecula;Allecula rhenana;France;Bold;PSFOR1511-17;-  
 Coleoptera;Tenebrionidae;Allecula;Allecula suberina;France;Bold;PSFOR1512-17;-  
 Coleoptera;Cleridae;Allonyx;Allonyx quadrimaculatus;France;Bold;PSFOR622-13;-  
 Coleoptera;Elateridae;Ampedus;Ampedus auripes;France;Bold;PSFOR958-14;-  
 Coleoptera;Elateridae;Ampedus;Ampedus brunnicornis;France;Bold;PSFOR836-13;-  
 Coleoptera;Elateridae;Ampedus;Ampedus cardinalis;France;Bold;PSFOR943-14;-  
 Coleoptera;Elateridae;Ampedus;Ampedus cardinalis;France;Bold;PSFOR724-13;-  
 Coleoptera;Elateridae;Ampedus;Ampedus elegantulus;France;Bold;PSFOR945-14;-  
 Coleoptera;Elateridae;Ampedus;Ampedus erythrogonus;France;Bold;PSFOR917-14;-  
 Coleoptera;Elateridae;Ampedus;Ampedus erythrogonus;France;Bold;PSFOR825-13;-  
 Coleoptera;Elateridae;Ampedus;Ampedus nemoralis;France;Bold;PSFOR931-14;-  
 Coleoptera;Elateridae;Ampedus;Ampedus nemoralis;France;Bold;PSFOR830-13;-  
 Coleoptera;Elateridae;Ampedus;Ampedus nigerrimus;France;Bold;PSFOR944-14;-  
 Coleoptera;Elateridae;Ampedus;Ampedus nigerrimus;France;Bold;PSFOR336-13;-  
 Coleoptera;Elateridae;Ampedus;Ampedus nigrinus;France;Bold;PSFOR1283-17;-  
 Coleoptera;Elateridae;Ampedus;Ampedus nigrinus;France;Bold;PSFOR961-14;-  
 Coleoptera;Elateridae;Ampedus;Ampedus nigroflavus;France;Bold;PSFOR729-13;-  
 Coleoptera;Elateridae;Ampedus;Ampedus pomorum;France;Bold;PSFOR545-13;-  
 Coleoptera;Elateridae;Ampedus;Ampedus praeustus;France;Bold;PSFOR846-13;-  
 Coleoptera;Elateridae;Ampedus;Ampedus quercicola;France;Bold;PSFOR337-13;-  
 Coleoptera;Elateridae;Ampedus;Ampedus quercicola;Switzerland;Bold;ELAAA076-16;-  
 Coleoptera;Elateridae;Ampedus;Ampedus quercicola;Switzerland;Bold;ELAAA073-16;-  
 Coleoptera;Elateridae;Ampedus;Ampedus rufipennis;France;Bold;PSFOR934-14;-  
 Coleoptera;Elateridae;Ampedus;Ampedus rufipennis;France;Bold;PSFOR935-14;-  
 Coleoptera;Elateridae;Ampedus;Ampedus sanguineus;France;Bold;PSFOR826-13;-  
 Coleoptera;Elateridae;Ampedus;Ampedus sanguineus;Norway;Bold;NOCOL190-12;-  
 Coleoptera;Elateridae;Ampedus;Ampedus sanguineus;France;Bold;PSFOR831-13;-  
 Coleoptera;Elateridae;Ampedus;Ampedus sanguinolentus;Switzerland;Bold;ELAAA092-16;-  
 Coleoptera;Elateridae;Ampedus;Ampedus sanguinolentus;Switzerland;Bold;ELAAA091-16;-  
 Coleoptera;Elateridae;Ampedus;Ampedus sanguinolentus;Switzerland;Bold;ELAAA095-16;-  
 Coleoptera;Elateridae;Ampedus;Ampedus scrofa;France;Bold;PSFOR817-13;-  
 Coleoptera;Elateridae;Ampedus;Ampedus scrofa;France;Bold;PSFOR874-14;-  
 Coleoptera;Elateridae;Ampedus;Ampedus scrofa;France;Bold;PSFOR499-13;-  
 Coleoptera;Elateridae;Ampedus;Ampedus scrofa;France;Bold;PSFOR498-13;-  
 Coleoptera;Elateridae;Ampedus;Ampedus scrofa;France;Bold;PSFOR506-13;-  
 Coleoptera;Elateridae;Ampedus;Ampedus scrofa;France;Bold;PSFOR515-13;-  
 Coleoptera;Elateridae;Ampedus;Ampedus scrofa;France;Bold;PSFOR514-13;-  
 Coleoptera;Elateridae;Ampedus;Ampedus scrofa;France;Bold;PSFOR509-13;-  
 Coleoptera;Elateridae;Ampedus;Ampedus scrofa;France;Bold;PSFOR500-13;-  
 Coleoptera;Elateridae;Ampedus;Ampedus scrofa;France;Bold;PSFOR501-13;-  
 Coleoptera;Elateridae;Ampedus;Ampedus scrofa;France;Bold;PSFOR513-13;-  
 Coleoptera;Elateridae;Ampedus;Ampedus scrofa;France;Bold;PSFOR505-13;-  
 Coleoptera;Elateridae;Ampedus;Ampedus scrofa;France;Bold;PSFOR496-13;-  
 Coleoptera;Elateridae;Ampedus;Ampedus scrofa;France;Bold;PSFOR816-13;-  
 Coleoptera;Elateridae;Ampedus;Ampedus scrofa;France;Bold;PSFOR497-13;-  
 Coleoptera;Elateridae;Ampedus;Ampedus scrofa;France;Bold;PSFOR525-13;-  
 Coleoptera;Bostrichidae;Amphicerus;Amphicerus bimaculatus;France;Bold;PSFOR1090-17;-  
 Coleoptera;Bostrichidae;Amphicerus;Amphicerus bimaculatus;France;Bold;PSFOR1092-17;-  
 Coleoptera;Bostrichidae;Amphicerus;Amphicerus bimaculatus;France;Bold;PSFOR1091-17;-  
 Coleoptera;Nitidulidae;Amphotis;Amphotis marginata;France;Bold;PSFOR643-13;-

Coleoptera;Cerambycidae;Anaglyptus;Anaglyptus gibbosus;France;Bold;PSFOR033-13;-  
 Coleoptera;Cerambycidae;Anaglyptus;Anaglyptus mysticus;France;Bold;PSFOR866-14;-  
 Coleoptera;Scraptiidae;Anaspis;Anaspis frontalis;Austria;Bold;TDAOE581-21;-  
 Coleoptera;Scraptiidae;Anaspis;Anaspis frontalis;Austria;Bold;TDAOE319-21;-  
 Coleoptera;Aderidae;Anidorus;Anidorus sanguinolentus;France;Bold;PSFOR1077-17;-  
 Coleoptera;Aderidae;Anidorus;Anidorus sanguinolentus;France;Bold;PSFOR1076-17;-  
 Coleoptera;Curculionidae;Anisandrus;Anisandrus dispar;Norway;Bold;NOCLP1792-19;-  
 Coleoptera;Curculionidae;Anisandrus;Anisandrus dispar;Russia;Bold;SCOLY173-11;-  
 Coleoptera;Leiodidae;Anisotoma;Anisotoma castanea;Austria;Bold;TDAAT1774-20;-  
 Coleoptera;Leiodidae;Anisotoma;Anisotoma humeralis;France;Bold;PSFOR298-13;-  
 Coleoptera;Ptinidae;Anobium;Anobium hederiae;France;Bold;PSFOR1049-14;-  
 Coleoptera;Ptinidae;Anobium;Anobium punctatum;Austria;Bold;TDAAT1245-20;-  
 Coleoptera;Ptinidae;Anobium;Anobium punctatum;France;Bold;PSFOR696-13;-  
 Coleoptera;Ptinidae;Anobium;Anobium punctatum;Austria;Bold;TDAAT1574-20;-  
 Coleoptera;Oedemeridae;Anogcodes;Anogcodes seladonius;France;Bold;PSFOR1417-17;-  
 Coleoptera;Cerambycidae;Anoplodera;Anoplodera sexguttata;France;Bold;PSFOR037-13;-  
 Coleoptera;Buprestidae;Anthaxia;Anthaxia hungarica;France;Bold;PSFOR577-13;-  
 Coleoptera;Buprestidae;Anthaxia;Anthaxia salicis;France;Bold;PSFOR578-13;-  
 Coleoptera;Buprestidae;Anthaxia;Anthaxia sepulchralis;France;Bold;PSFOR579-13;-  
 Coleoptera;Anthribidae;Anthribus;Anthribus nebulosus;France;Bold;PSFOR178-13;-  
 Coleoptera;Anthribidae;Anthribus;Anthribus nebulosus;Norway;Bold;NOCLP3347-22;-  
 Coleoptera;Anthribidae;Anthribus;Anthribus nebulosus;Norway;Bold;NOCLP3313-22;-  
 Coleoptera;Anthribidae;Anthribus;Anthribus nebulosus;Norway;Bold;NOCLP3314-22;-  
 Coleoptera;Anthribidae;Anthribus;Anthribus scapularis;Finland;Bold;COLFC122-12;-  
 Coleoptera;Curculionidae;Aphanommata;Aphanommata filum;France;Bold;PSFOR1164-17;-  
 Coleoptera;Cerambycidae;Aromia;Aromia moschata;France;Bold;PSFOR038-13;-  
 Coleoptera;Cerambycidae;Aromia;Aromia moschata;France;Bold;PSFOR039-13;-  
 Coleoptera;Sphindidae;Aspidiphorus;Aspidiphorus orbiculatus;United Kingdom;Bold;UKAN393-22;-  
 Coleoptera;Sphindidae;Aspidiphorus;Aspidiphorus orbiculatus;France;Bold;PSFOR666-13;-  
 Coleoptera;Zopheridae;Aulonium;Aulonium ruficorne;France;Bold;PSFOR788-13;-  
 Coleoptera;Zopheridae;Bibloporus;Bibloporus minutus;Finland;Bold;COLFD129-12;-  
 Coleoptera;Biphyllidae;Biphyllus;Biphyllus frater;France;Bold;PSFOR608-13;-  
 Coleoptera;Zopheridae;Bitoma;Bitoma crenata;France;Bold;PSFOR003-13;-  
 Coleoptera;Staphylinidae;Bolitochara;Bolitochara obliqua;United Kingdom;Bold;UKAN527-22;-  
 Coleoptera;Tenebrionidae;Bolitophagus;Bolitophagus interruptus;France;Bold;PSFOR1549-17;-  
 Coleoptera;Tenebrionidae;Bolitophagus;Bolitophagus reticulatus;France;Bold;PSFOR482-13;-  
 Coleoptera;Tenebrionidae;Bolitophagus;Bolitophagus reticulatus;Finland;Bold;COLFC555-12;-  
 Coleoptera;Bostrichidae;Bostrichus;Bostrichus capucinus;France;Bold;PSFOR609-13;-  
 Coleoptera;Bostrichidae;Bostrichus;Bostrichus capucinus;Finland;Bold;COLFA168-10;-  
 Coleoptera;Bothrideridae;Bothrideres;Bothrideres bipunctatus;France;Bold;PSFOR618-13;-  
 Coleoptera;Bothrideridae;Bothrideres;Bothrideres bipunctatus;France;Bold;PSFOR1098-17;-  
 Coleoptera;Elateridae;Brachygonus;Brachygonus megerlei;Switzerland;Bold;ELAAA105-16;-  
 Coleoptera;Elateridae;Brachygonus;Brachygonus megerlei;Switzerland;Bold;ELAAA001-16;-  
 Coleoptera;Elateridae;Brachygonus;Brachygonus ruficeps;France;Bold;PSFOR742-13;-  
 Coleoptera;Buprestidae;Buprestis;Buprestis haemorrhoidalis;Italy;Bold;PSFOR581-13;-  
 Coleoptera;Ptinidae;Cacotemnus;Cacotemnus rufipes;France;Bold;PSFOR672-13;-  
 Coleoptera;Cryptophagidae;Caenoscelis;Caenoscelis ferruginea;Finland;Bold;COLFD084-12;-  
 Coleoptera;Elateridae;Calambus;Calambus bipustulatus;France;Bold;PSFOR743-13;-  
 Coleoptera;Elateridae;Calambus;Calambus bipustulatus;France;Bold;PSFOR334-13;-  
 Coleoptera;Cerambycidae;Callidium;Callidium coriaceum;Finland;Bold;COLFA501-12;-  
 Coleoptera;Cerambycidae;Callidium;Callidium violaceum;France;Bold;PSFOR043-13;-  
 Coleoptera;Cerambycidae;Callimus;Callimus angulatus;France;Bold;PSFOR110-13;-  
 Coleoptera;Oedemeridae;Calopus;Calopus serraticornis;France;Bold;PSFOR650-13;-  
 Coleoptera;Curculionidae;Camptorhinus;Camptorhinus simplex;France;Bold;PSFOR1173-17;-  
 Coleoptera;Elateridae;Cardiophorus;Cardiophorus anticus;France;Bold;PSFOR946-14;-  
 Coleoptera;Elateridae;Cardiophorus;Cardiophorus gramineus;France;Bold;PSFOR745-13;-  
 Coleoptera;Curculionidae;Carphoborus;Carphoborus perrisi;France;Bold;PSFOR1175-17;-  
 Coleoptera;Curculionidae;Carphoborus;Carphoborus perrisi;France;Bold;PSFOR1176-17;-  
 Coleoptera;Latridiidae;Cartodere;Cartodere nodifer;United Kingdom;Bold;UKAN361-22;-  
 Coleoptera;Cerambycidae;Cerambyx;Cerambyx cerdo;Spain;Bold;OAKCE002-18;-  
 Coleoptera;Cerambycidae;Cerambyx;Cerambyx cerdo;Spain;Bold;OAKCE001-18;-  
 Coleoptera;Cerophytidae;Cerophytum;Cerophytum elateroides;France;Bold;PSFOR237-13;-  
 Coleoptera;Cerylonidae;Cerylon;Cerylon deplanatum;France;Bold;PSFOR804-13;-  
 Coleoptera;Cerylonidae;Cerylon;Cerylon fagi;Austria;Bold;TDAOE341-21;-  
 Coleoptera;Cerylonidae;Cerylon;Cerylon fagi;France;Bold;PSFOR805-13;-  
 Coleoptera;Cerylonidae;Cerylon;Cerylon ferrugineum;France;Bold;PSFOR806-13;-  
 Coleoptera;Cerylonidae;Cerylon;Cerylon ferrugineum;Finland;Bold;COLFD131-12;-  
 Coleoptera;Cerylonidae;Cerylon;Cerylon histeroides;France;Bold;PSFOR807-13;-  
 Coleoptera;Cerylonidae;Cerylon;Cerylon histeroides;Finland;Bold;COLFA059-10;-  
 Coleoptera;Cerylonidae;Cerylon;Cerylon histeroides;France;Bold;PSFOR1043-14;-  
 Coleoptera;Scarabaeidae;Cetonia;Cetonia aurata;France;Bold;PSFOR300-13;-  
 Coleoptera;Scarabaeidae;Cetonia;Cetonia aurata;Finland;Bold;COLFA132-10;-  
 Coleoptera;Cerambycidae;Chlorophorus;Chlorophorus figuratus;France;Bold;PSFOR047-13;-  
 Coleoptera;Oedemeridae;Chrysanthia;Chrysanthia geniculata;France;Bold;PSFOR651-13;-  
 Coleoptera;Ciidae;Cis;Cis bidentatus;Finland;Bold;COLFD112-12;-  
 Coleoptera;Ciidae;Cis;Cis boleti;United Kingdom;Bold;UKAN468-22;-  
 Coleoptera;Ciidae;Cis;Cis laminatus;France;Bold;PSFOR1144-17;-  
 Coleoptera;Ciidae;Cis;Cis rugulosus;France;Bold;PSFOR620-13;-

Coleoptera;Ciidae;Cis;Cis striatulus;France;Bold;PSFOR1145-17;-  
 Coleoptera;Cleridae;Clerus;Clerus mutillarius;Austria;Bold;SICOA155-18;-  
 Coleoptera;Cleridae;Clerus;Clerus mutillarius;France;Bold;PSFOR623-13;-  
 Coleoptera;Zopheridae;Colobicus;Colobicus hirtus;France;Bold;PSFOR790-13;-  
 Coleoptera;Zopheridae;Colobicus;Colobicus hirtus;France;Bold;PSFOR328-13;-  
 Coleoptera;Zopheridae;Colobicus;Colobicus hirtus;France;Bold;PSFOR477-13;-  
 Coleoptera;Zopheridae;Colydium;Colydium elongatum;France;Bold;PSFOR327-13;-  
 Coleoptera;Zopheridae;Colydium;Colydium elongatum;France;Bold;PSFOR485-13;-  
 Coleoptera;Melandryidae;Conopalpus;Conopalpus brevicollis;France;Bold;PSFOR364-13;-  
 Coleoptera;Melandryidae;Conopalpus;Conopalpus testaceus;France;Bold;PSFOR265-13;-  
 Coleoptera;Buprestidae;Coraebus;Coraebus undatus;France;Bold;PSFOR585-13;-  
 Coleoptera;Tenebrionidae;Corticeus;Corticeus bicoloroides;France;Bold;PSFOR1523-17;-  
 Coleoptera;Tenebrionidae;Corticeus;Corticeus fasciatus;France;Bold;PSFOR193-13;-  
 Coleoptera;Tenebrionidae;Corticeus;Corticeus suberis;France;Bold;PSFOR1524-17;-  
 Coleoptera;Tenebrionidae;Corticeus;Corticeus unicolor;France;Bold;PSFOR476-13;-  
 Coleoptera;Tenebrionidae;Corticeus;Corticeus unicolor;Austria;Bold;TDAOE364-21;-  
 Coleoptera;Curculionidae;Cossonus;Cossonus parallelepipedus;Norway;Bold;NOCLP1403-19;-  
 Coleoptera;Curculionidae;Cossonus;Cossonus parallelepipedus;Norway;Bold;NOCLP1402-19;-  
 Coleoptera;Zopheridae;Coxelus;Coxelus pictus;Italy;Bold;PSFOR792-13;-  
 Coleoptera;Curculionidae;Cryphalus;Cryphalus intermedius;France;Bold;PSFOR1181-17;-  
 Coleoptera;Curculionidae;Cryphalus;Cryphalus intermedius;France;Bold;PSFOR1180-17;-  
 Coleoptera;Nitidulidae;Cryptarcha;Cryptarcha undata;France;Bold;PSFOR1027-14;-  
 Coleoptera;Laemophloeidae;Cryptolestes;Cryptolestes ferrugineus;Germany;Bold;CSP050-09;-  
 Coleoptera;Cryptophagidae;Cryptophagus;Cryptophagus dentatus;Norway;Bold;NOCLP3198-22;-  
 Coleoptera;Cryptophagidae;Cryptophagus;Cryptophagus dorsalis;Norway;Bold;NOCLP3346-22;-  
 Coleoptera;Cryptophagidae;Cryptophagus;Cryptophagus intermedius;Norway;Bold;NOCLP3199-22;-  
 Coleoptera;Cryptophagidae;Cryptophagus;Cryptophagus lapponicus;Finland;Bold;COLFC520-12;-  
 Coleoptera;Cryptophagidae;Cryptophagus;Cryptophagus pilosus;Norway;Bold;NOCLP3200-22;-  
 Coleoptera;Cryptophagidae;Cryptophagus;Cryptophagus scanicus;Norway;Bold;NOCLP3197-22;-  
 Coleoptera;Cryptophagidae;Cryptophagus;Cryptophagus scutellatus;Norway;Bold;NOCLP3196-22;-  
 Coleoptera;Erotylidae;Cryptophilus;Cryptophilus integer;United Kingdom;Bold;UKAN395-22;-  
 Coleoptera;Curculionidae;Cryptorhynchus;Cryptorhynchus lapathi;Norway;Bold;NOCLP1426-19;-  
 Coleoptera;Curculionidae;Crypturgus;Crypturgus hispidulus;Norway;Bold;NOCLP1765-19;-  
 Coleoptera;Curculionidae;Crypturgus;Crypturgus hispidulus;Norway;Bold;NOCLP1766-19;-  
 Coleoptera;Curculionidae;Crypturgus;Crypturgus mediterraneus;France;Bold;PSFOR1186-17;-  
 Coleoptera;Curculionidae;Crypturgus;Crypturgus numidicus;France;Bold;PSFOR1185-17;-  
 Coleoptera;Curculionidae;Crypturgus;Crypturgus numidicus;France;Bold;PSFOR1183-17;-  
 Coleoptera;Curculionidae;Crypturgus;Crypturgus numidicus;France;Bold;PSFOR1184-17;-  
 Coleoptera;Dermeestidae;Ctesias;Ctesias serra;United Kingdom;Bold;UKAN379-22;-  
 Coleoptera;Nitidulidae;Cychramus;Cychramus luteus;Finland;Bold;COLFA525-12;-  
 Coleoptera;Nitidulidae;Cychramus;Cychramus luteus;Norway;Bold;NOCLP3141-22;-  
 Coleoptera;Nitidulidae;Cychramus;Cychramus luteus;France;Bold;PSFOR288-13;-  
 Coleoptera;Nitidulidae;Cychramus;Cychramus variegatus;Norway;Bold;NOCLP3139-22;-  
 Coleoptera;Nitidulidae;Cychramus;Cychramus variegatus;Norway;Bold;NOCLP3140-22;-  
 Coleoptera;Nitidulidae;Cyllodes;Cyllodes ater;France;Bold;PSFOR645-13;-  
 Coleoptera;Erotylidae;Dacne;Dacne bipustulata;France;Bold;PSFOR325-13;-  
 Coleoptera;Erotylidae;Dacne;Dacne bipustulata;France;Bold;PSFOR324-13;-  
 Coleoptera;Erotylidae;Dacne;Dacne bipustulata;France;Bold;PSFOR487-13;-  
 Coleoptera;Elateridae;Danosoma;Danosoma fasciatum;Switzerland;Bold;ELAAA108-16;-  
 Coleoptera;Melyridae;Dasytes;Dasytes caeruleus;France;Bold;PSFOR1373-17;-  
 Coleoptera;Melyridae;Dasytes;Dasytes croceipes;France;Bold;PSFOR1375-17;-  
 Coleoptera;Melyridae;Dasytes;Dasytes pauperculus;France;Bold;PSFOR1380-17;-  
 Coleoptera;Curculionidae;Dendroctonus;Dendroctonus micans;France;Bold;PSFOR704-13;-  
 Coleoptera;Cleridae;Denops;Denops albofasciatus;France;Bold;PSFOR624-13;-  
 Coleoptera;Elateridae;Denticollis;Denticollis linearis;Norway;Bold;NOCOL017-12;-  
 Coleoptera;Elateridae;Denticollis;Denticollis linearis;France;Bold;PSFOR333-13;-  
 Coleoptera;Tenebrionidae;Diaperis;Diaperis boleti;Austria;Bold;TDAAT1941-20;-  
 Coleoptera;Tenebrionidae;Diaperis;Diaperis boleti;Finland;Bold;COLFA150-10;-  
 Coleoptera;Lycidae;Dictyoptera;Dictyoptera aurora;France;Bold;PSFOR639-13;-  
 Coleoptera;Latridiidae;Dienerella;Dienerella vincenti;Finland;Bold;COLFD230-12;-  
 Coleoptera;Biphyllidae;Diplocoelus;Diplocoelus fagi;France;Bold;PSFOR915-14;-  
 Coleoptera;Biphyllidae;Diplocoelus;Diplocoelus fagi;France;Bold;PSFOR299-13;-  
 Coleoptera;Biphyllidae;Diplocoelus;Diplocoelus fagi;France;Bold;PSFOR007-13;-  
 Coleoptera;Melandryidae;Dircaea;Dircaea australis;France;Bold;PSFOR260-13;-  
 Coleoptera;Anthribidae;Dissoleucas;Dissoleucas niveirostris;Norway;Bold;NOCLP3318-22;-  
 Coleoptera;Anthribidae;Dissoleucas;Dissoleucas niveirostris;Norway;Bold;NOCLP3317-22;-  
 Coleoptera;Anthribidae;Dissoleucas;Dissoleucas niveirostris;France;Bold;PSFOR308-13;-  
 Coleoptera;Ptinidae;Dorcatoma;Dorcatoma flavicornis;France;Bold;PSFOR1444-17;-  
 Coleoptera;Ptinidae;Dorcatoma;Dorcatoma flavicornis;France;Bold;PSFOR1445-17;-  
 Coleoptera;Eucnemidae;Dromaeolus;Dromaeolus barnabita;France;Bold;PSFOR995-14;-  
 Coleoptera;Eucnemidae;Dromaeolus;Dromaeolus barnabita;France;Bold;PSFOR590-13;-  
 Coleoptera;Staphylinidae;Dropephylla;Dropephylla koltzei;Norway;Bold;NOCLP1804-19;-  
 Coleoptera;Curculionidae;Dryocoetes;Dryocoetes alni;Norway;Bold;NOCLP1786-19;-  
 Coleoptera;Curculionidae;Dryocoetes;Dryocoetes alni;Norway;Bold;NOCLP1787-19;-  
 Coleoptera;Elateridae;Elater;Elater ferrugineus;France;Bold;PSFOR752-13;-  
 Coleoptera;Elateridae;Elater;Elater ferrugineus;France;Bold;PSFOR948-14;-  
 Coleoptera;Elateridae;Elater;Elater ferrugineus;Switzerland;Bold;ELAAA107-16;-  
 Coleoptera;Lymexylidae;Elateroides;Elateroides dermestoides;France;Bold;PSFOR887-14;-

Coleoptera;Tenebrionidae;Eledonoprius;Eledonoprius serrifrons;France;Bold;PSFOR1553-17;-  
 Coleoptera;Endomychidae;Endomychus;Endomychus coccineus;France;Bold;PSFOR631-13;-  
 Coleoptera;Anthribidae;Enedreytes;Enedreytes hilaris;France;Bold;PSFOR1080-17;-  
 Coleoptera;Anthribidae;Enedreytes;Enedreytes hilaris;France;Bold;PSFOR1081-17;-  
 Coleoptera;Anthribidae;Enedreytes;Enedreytes sepicola;France;Bold;PSFOR172-13;-  
 Coleoptera;Anthribidae;Enedreytes;Enedreytes sepicola;France;Bold;PSFOR895-14;-  
 Coleoptera;Latridiidae;Enicmus;Enicmus fungicola;Finland;Bold;COLFD123-12;-  
 Coleoptera;Latridiidae;Enicmus;Enicmus testaceus;United Kingdom;Bold;UKAN371-22;-  
 Coleoptera;Latridiidae;Enicmus;Enicmus testaceus;Austria;Bold;TDAOE609-21;-  
 Coleoptera;Eucnemidae;Epiphanis;Epiphanis cornutus;France;Bold;PSFOR591-13;-  
 Coleoptera;Ptinidae;Episernus;Episernus angulicollis;France;Bold;PSFOR1480-17;-  
 Coleoptera;Ptinidae;Episernus;Episernus gentilis;France;Bold;PSFOR1479-17;-  
 Coleoptera;Ptinidae;Episernus;Episernus striatellus;France;Bold;PSFOR1481-17;-  
 Coleoptera;Nitidulidae;Epuraea;Epuraea angustula;Norway;Bold;NOCLP3176-22;-  
 Coleoptera;Nitidulidae;Epuraea;Epuraea angustula;Norway;Bold;NOCLP3175-22;-  
 Coleoptera;Nitidulidae;Epuraea;Epuraea biguttata;Norway;Bold;NOCLP3143-22;-  
 Coleoptera;Nitidulidae;Epuraea;Epuraea binotata;Norway;Bold;NOCLP3182-22;-  
 Coleoptera;Nitidulidae;Epuraea;Epuraea boreella;Norway;Bold;NOCLP3183-22;-  
 Coleoptera;Nitidulidae;Epuraea;Epuraea boreella;Norway;Bold;NOCLP3184-22;-  
 Coleoptera;Nitidulidae;Epuraea;Epuraea limbata;Norway;Bold;NOCLP3154-22;-  
 Coleoptera;Nitidulidae;Epuraea;Epuraea longiclavis;Norway;Bold;NOCLP3185-22;-  
 Coleoptera;Nitidulidae;Epuraea;Epuraea marseuli;Norway;Bold;NOCLP3179-22;-  
 Coleoptera;Nitidulidae;Epuraea;Epuraea marseuli;Norway;Bold;NOCLP3181-22;-  
 Coleoptera;Nitidulidae;Epuraea;Epuraea marseuli;Norway;Bold;NOCLP3180-22;-  
 Coleoptera;Nitidulidae;Epuraea;Epuraea melanocephala;Norway;Bold;NOCLP3159-22;-  
 Coleoptera;Nitidulidae;Epuraea;Epuraea melanocephala;Norway;Bold;NOCLP3160-22;-  
 Coleoptera;Nitidulidae;Epuraea;Epuraea neglecta;Norway;Bold;NOCLP3161-22;-  
 Coleoptera;Nitidulidae;Epuraea;Epuraea neglecta;Norway;Bold;NOCLP3162-22;-  
 Coleoptera;Nitidulidae;Epuraea;Epuraea placida;Norway;Bold;NOCLP3157-22;-  
 Coleoptera;Nitidulidae;Epuraea;Epuraea placida;Norway;Bold;NOCLP3156-22;-  
 Coleoptera;Nitidulidae;Epuraea;Epuraea placida;Norway;Bold;NOCLP3155-22;-  
 Coleoptera;Nitidulidae;Epuraea;Epuraea pygmaea;Norway;Bold;NOCLP3178-22;-  
 Coleoptera;Nitidulidae;Epuraea;Epuraea pygmaea;Norway;Bold;NOCLP3177-22;-  
 Coleoptera;Nitidulidae;Epuraea;Epuraea rufomarginata;Norway;Bold;NOCLP3153-22;-  
 Coleoptera;Nitidulidae;Epuraea;Epuraea silacea;Norway;Bold;NOCLP3142-22;-  
 Coleoptera;Nitidulidae;Epuraea;Epuraea terminalis;Austria;Bold;TDAOE261-21;-  
 Coleoptera;Nitidulidae;Epuraea;Epuraea unicolor;Norway;Bold;NOCLP3147-22;-  
 Coleoptera;Nitidulidae;Epuraea;Epuraea unicolor;Norway;Bold;NOCLP3146-22;-  
 Coleoptera;Nitidulidae;Epuraea;Epuraea unicolor;Norway;Bold;NOCLP3145-22;-  
 Coleoptera;Nitidulidae;Epuraea;Epuraea unicolor;Norway;Bold;NOCLP3144-22;-  
 Coleoptera;Nitidulidae;Epuraea;Epuraea variegata;Norway;Bold;NOCLP3148-22;-  
 Coleoptera;Nitidulidae;Epuraea;Epuraea variegata;Norway;Bold;NOCLP3149-22;-  
 Coleoptera;Cerambycidae;Ergates;Ergates faber;France;Bold;PSFOR1139-17;-  
 Coleoptera;Ptinidae;Ernobius;Ernobius gigas;France;Bold;PSFOR1475-17;-  
 Coleoptera;Ptinidae;Ernobius;Ernobius kiesenwetteri;France;Bold;PSFOR1474-17;-  
 Coleoptera;Ptinidae;Ernobius;Ernobius laticollis;France;Bold;PSFOR1471-17;-  
 Coleoptera;Ptinidae;Ernobius;Ernobius longicornis;France;Bold;PSFOR1472-17;-  
 Coleoptera;Ptinidae;Ernobius;Ernobius mollis;France;Bold;PSFOR693-13;-  
 Coleoptera;Ptinidae;Ernobius;Ernobius parens;France;Bold;PSFOR1473-17;-  
 Coleoptera;Ptinidae;Ernobius;Ernobius pruinosus;France;Bold;PSFOR1470-17;-  
 Coleoptera;Curculionidae;Ernoporus;Ernoporus tiliae;Norway;Bold;NOCLP1777-19;-  
 Coleoptera;Mycetophagidae;Esarcus;Esarcus abeillei;France;Bold;PSFOR1407-17;-  
 Coleoptera;Eucnemidae;Eucnemis;Eucnemis capucina;France;Bold;PSFOR322-13;-  
 Coleoptera;Eucnemidae;Eucnemis;Eucnemis capucina;France;Bold;PSFOR867-14;-  
 Coleoptera;Anthribidae;Eusphyrus;Eusphyrus vasconicus;France;Bold;PSFOR1082-17;-  
 Coleoptera;Cerambycidae;Exocentrus;Exocentrus adpersus;France;Bold;PSFOR983-14;-  
 Coleoptera;Staphylinidae;Gabrius;Gabrius splendidulus;Norway;Bold;NOCLP3244-22;-  
 Coleoptera;Staphylinidae;Gabrius;Gabrius splendidulus;Norway;Bold;NOCLP3245-22;-  
 Coleoptera;Ptinidae;Gastrallus;Gastrallus corsicus;France;Bold;PSFOR1436-17;-  
 Coleoptera;Cerambycidae;Glaphyra;Glaphyra marmottani;France;Bold;PSFOR1111-17;-  
 Coleoptera;Nitidulidae;Glischrochilus;Glischrochilus quadripunctatus;Finland;Bold;COLFA415-12;-  
 Coleoptera;Dermestidae;Globicornis;Globicornis bifasciata;France;Bold;PSFOR1263-17;-  
 Coleoptera;Dermestidae;Globicornis;Globicornis fasciata;France;Bold;PSFOR1266-17;-  
 Coleoptera;Dermestidae;Globicornis;Globicornis fasciata;France;Bold;PSFOR1265-17;-  
 Coleoptera;Dermestidae;Globicornis;Globicornis variegata;France;Bold;PSFOR1267-17;-  
 Coleoptera;Histeridae;Gnathoncus;Gnathoncus rotundatus;United Kingdom;Bold;UKAN455-22;-  
 Coleoptera;Cerambycidae;Gracilia;Gracilia minuta;Austria;Bold;SICOE926-19;-  
 Coleoptera;Cerambycidae;Gracilia;Gracilia minuta;France;Bold;PSFOR053-13;-  
 Coleoptera;Cerambycidae;Grammoptera;Grammoptera abdominalis;France;Bold;PSFOR126-13;-  
 Coleoptera;Cerambycidae;Grammoptera;Grammoptera ruficornis;France;Bold;PSFOR127-13;-  
 Coleoptera;Cerambycidae;Grammoptera;Grammoptera ustulata;France;Bold;PSFOR128-13;-  
 Coleoptera;Ptinidae;Grynobius;Grynobius planus;France;Bold;PSFOR691-13;-  
 Coleoptera;Ptinidae;Hadrobregmus;Hadrobregmus pertinax;Finland;Bold;COLFD125-12;-  
 Coleoptera;Tetratomidae;Hallomenus;Hallomenus binotatus;United Kingdom;Bold;UKAN342-22;-  
 Coleoptera;Tetratomidae;Hallomenus;Hallomenus binotatus;France;Bold;PSFOR293-13;-  
 Coleoptera;Ptinidae;Hemicoelus;Hemicoelus canaliculatus;France;Bold;PSFOR1434-17;-  
 Coleoptera;Ptinidae;Hemicoelus;Hemicoelus costatus;France;Bold;PSFOR701-13;-  
 Coleoptera;Ptinidae;Hemicoelus;Hemicoelus fulvicornis;France;Bold;PSFOR1050-14;-

Coleoptera;Histeridae;Hololepta;Hololepta plana;France;Bold;PSFOR285-13;-  
 Coleoptera;Curculionidae;Hylastes;Hylastes angustatus;France;Bold;PSFOR705-13;-  
 Coleoptera;Curculionidae;Hylastes;Hylastes angustatus;Norway;Bold;NOCLP1736-19;-  
 Coleoptera;Curculionidae;Hylastes;Hylastes attenuatus;Norway;Bold;NOCLP1738-19;-  
 Coleoptera;Curculionidae;Hylastes;Hylastes attenuatus;Norway;Bold;NOCLP1737-19;-  
 Coleoptera;Curculionidae;Hylastes;Hylastes cunicularius;Norway;Bold;NOCLP1730-19;-  
 Coleoptera;Curculionidae;Hylastes;Hylastes cunicularius;Norway;Bold;NOCLP1731-19;-  
 Coleoptera;Eucnemidae;Hylis;Hylis cariniceps;Austria;Bold;TDAAT1951-20;-  
 Coleoptera;Eucnemidae;Hylis;Hylis cariniceps;France;Bold;PSFOR316-13;-  
 Coleoptera;Eucnemidae;Hylis;Hylis foveicollis;France;Bold;PSFOR997-14;-  
 Coleoptera;Eucnemidae;Hylis;Hylis foveicollis;France;Bold;PSFOR896-14;-  
 Coleoptera;Eucnemidae;Hylis;Hylis foveicollis;France;Bold;PSFOR592-13;-  
 Coleoptera;Eucnemidae;Hylis;Hylis olexai;United Kingdom;Bold;UKAN396-22;-  
 Coleoptera;Eucnemidae;Hylis;Hylis olexai;France;Bold;PSFOR902-14;-  
 Coleoptera;Eucnemidae;Hylis;Hylis olexai;France;Bold;PSFOR898-14;-  
 Coleoptera;Eucnemidae;Hylis;Hylis olexai;France;Bold;PSFOR593-13;-  
 Coleoptera;Eucnemidae;Hylis;Hylis olexai;France;Bold;PSFOR1330-17;-  
 Coleoptera;Eucnemidae;Hylis;Hylis olexai;France;Bold;PSFOR1009-14;-  
 Coleoptera;Eucnemidae;Hylis;Hylis simonae;France;Bold;PSFOR594-13;-  
 Coleoptera;Eucnemidae;Hylis;Hylis simonae;France;Bold;PSFOR1045-14;-  
 Coleoptera;Curculionidae;Hylobius;Hylobius pinastri;Estonia;Bold;COLFC732-12;-  
 Coleoptera;Curculionidae;Hylobius;Hylobius pinastri;Norway;Bold;NOCLP1413-19;-  
 Coleoptera;Curculionidae;Hylobius;Hylobius pinastri;Norway;Bold;NOCLP1412-19;-  
 Coleoptera;Cerambycidae;Hylotrupes;Hylotrupes bajulus;France;Bold;PSFOR054-13;-  
 Coleoptera;Cerambycidae;Hylotrupes;Hylotrupes bajulus;France;Bold;PSFOR055-13;-  
 Coleoptera;Curculionidae;Hylurgops;Hylurgops glabratus;Norway;Bold;NOCLP1724-19;-  
 Coleoptera;Curculionidae;Hylurgops;Hylurgops palliatus;France;Bold;PSFOR707-13;-  
 Coleoptera;Tenebrionidae;Hymenalia;Hymenalia rufipes;France;Bold;PSFOR207-13;-  
 Coleoptera;Elateridae;Hypoganus;Hypoganus inunctus;France;Bold;PSFOR970-14;-  
 Coleoptera;Cerambycidae;Icosium;Icosium tomentosum;France;Bold;PSFOR1113-17;-  
 Coleoptera;Nitidulidae;Ipidia;Ipidia binotata;France;Bold;PSFOR646-13;-  
 Coleoptera;Curculionidae;Ips;Ips sexdentatus;Norway;Bold;NOCLP1769-19;-  
 Coleoptera;Curculionidae;Ips;Ips typographus;Norway;Bold;NOCLP1771-19;-  
 Coleoptera;Elateridae;Ischnodes;Ischnodes sanguinicollis;France;Bold;PSFOR964-14;-  
 Coleoptera;Elateridae;Ischnodes;Ischnodes sanguinicollis;France;Bold;PSFOR966-14;-  
 Coleoptera;Oedemeridae;Ischnomera;Ischnomera caerulea;France;Bold;PSFOR653-13;-  
 Coleoptera;Oedemeridae;Ischnomera;Ischnomera cinerascens;France;Bold;PSFOR654-13;-  
 Coleoptera;Oedemeridae;Ischnomera;Ischnomera sanguinicollis;France;Bold;PSFOR656-13;-  
 Coleoptera;Eucnemidae;Isorhipis;Isorhipis melasoides;France;Bold;PSFOR314-13;-  
 Coleoptera;Elateridae;Lacon;Lacon punctatus;France;Bold;PSFOR942-14;-  
 Coleoptera;Elateridae;Lacon;Lacon querceus;France;Bold;PSFOR968-14;-  
 Coleoptera;Laemophloeidae;Laemophloeus;Laemophloeus kraussi;France;Bold;PSFOR910-14;-  
 Coleoptera;Laemophloeidae;Laemophloeus;Laemophloeus monilis;France;Bold;PSFOR1014-14;-  
 Coleoptera;Laemophloeidae;Laemophloeus;Laemophloeus nigricollis;France;Bold;PSFOR636-13;-  
 Coleoptera;Buprestidae;Lamprodila;Lamprodila festiva;France;Bold;PSFOR587-13;-  
 Coleoptera;Buprestidae;Lamprodila;Lamprodila festiva;Austria;Bold;TDAAT961-20;-  
 Coleoptera;Laemophloeidae;Lathropus;Lathropus sepicola;France;Bold;PSFOR637-13;-  
 Coleoptera;Cerambycidae;Leiopus;Leiopus nebulosus;Austria;Bold;TDAOE622-21;-  
 Coleoptera;Cerambycidae;Leiopus;Leiopus nebulosus;United Kingdom;Bold;UKAN375-22;-  
 Coleoptera;Cerambycidae;Leptura;Leptura aethiops;France;Bold;PSFOR129-13;-  
 Coleoptera;Cerambycidae;Leptura;Leptura aurulenta;France;Bold;PSFOR058-13;-  
 Coleoptera;Staphylinidae;Leptusa;Leptusa fumida;United Kingdom;Bold;UKAN503-22;-  
 Coleoptera;Staphylinidae;Leptusa;Leptusa pulchella;United Kingdom;Bold;UKAN461-22;-  
 Coleoptera;Bostrichidae;Lichenophanes;Lichenophanes varius;France;Bold;PSFOR610-13;-  
 Coleoptera;Salpingidae;Lissodema;Lissodema denticolle;United Kingdom;Bold;UKAN542-22;-  
 Coleoptera;Salpingidae;Lissodema;Lissodema denticolle;France;Bold;PSFOR779-13;-  
 Coleoptera;Mycetophagidae;Litargus;Litargus connexus;France;Bold;PSFOR358-13;-  
 Coleoptera;Mycetophagidae;Litargus;Litargus connexus;France;Bold;PSFOR353-13;-  
 Coleoptera;Lucanidae;Lucanus;Lucanus cervus;Austria;Bold;TDAOE286-21;-  
 Coleoptera;Endomychidae;Lycoperdina;Lycoperdina bovistae;France;Bold;PSFOR1314-17;-  
 Coleoptera;Endomychidae;Lycoperdina;Lycoperdina bovistae;France;Bold;PSFOR1315-17;-  
 Coleoptera;Elmidae;Macronychus;Macronychus quadrituberculatus;United Kingdom;Bold;DTNHM1432-21;-  
 Coleoptera;Histeridae;Margarinotus;Margarinotus merdarius;France;Bold;PSFOR1352-17;-  
 Coleoptera;Histeridae;Margarinotus;Margarinotus merdarius;United Kingdom;Bold;UKAN529-22;-  
 Coleoptera;Histeridae;Margarinotus;Margarinotus striola;Finland;Bold;COLFC450-12;-  
 Coleoptera;Histeridae;Margarinotus;Margarinotus striola;France;Bold;PSFOR1353-17;-  
 Coleoptera;Histeridae;Margarinotus;Margarinotus striola;Finland;Bold;COLFE957-13;-  
 Coleoptera;Histeridae;Margarinotus;Margarinotus striola;Finland;Bold;COLFE956-13;-  
 Coleoptera;Elateridae;Megapenthes;Megapenthes lugens;France;Bold;PSFOR757-13;-  
 Coleoptera;Dermeestidae;Megatoma;Megatoma undata;France;Bold;PSFOR1268-17;-  
 Coleoptera;Melandryidae;Melandrya;Melandrya barbata;France;Bold;PSFOR267-13;-  
 Coleoptera;Elateridae;Melanotus;Melanotus castanipes;France;Bold;PSFOR820-13;-  
 Coleoptera;Elateridae;Melanotus;Melanotus castanipes;France;Bold;PSFOR821-13;-  
 Coleoptera;Elateridae;Melanotus;Melanotus villosus;France;Bold;PSFOR822-13;-  
 Coleoptera;Eucnemidae;Melasis;Melasis buprestoides;France;Bold;PSFOR318-13;-  
 Coleoptera;Buprestidae;Meliboeus;Meliboeus fulgidicollis;France;Bold;PSFOR1001-14;-  
 Coleoptera;Tenebrionidae;Menephrus;Menephrus cylindricus;France;Bold;PSFOR1535-17;-  
 Coleoptera;Cerambycidae;Menesia;Menesia bipunctata;France;Bold;PSFOR061-13;-



Coleoptera;Curculionidae;Mesites;Mesites aquitanus;France;Bold;PSFOR1165-17;-  
 Coleoptera;Curculionidae;Mesites;Mesites cunipes;France;Bold;PSFOR1166-17;-  
 Coleoptera;Ptinidae;Mesocoelopus;Mesocoelopus collaris;France;Bold;PSFOR674-13;-  
 Coleoptera;Ptinidae;Mesocoelopus;Mesocoelopus niger;France;Bold;PSFOR675-13;-  
 Coleoptera;Cerambycidae;Mesosa;Mesosa nebulosa;France;Bold;PSFOR307-13;-  
 Coleoptera;Ptinidae;Mesother;Mesother ferrugineus;France;Bold;PSFOR1486-17;-  
 Coleoptera;Eucnemidae;Microrhagus;Microrhagus emyi;France;Bold;PSFOR595-13;-  
 Coleoptera;Eucnemidae;Microrhagus;Microrhagus emyi;France;Bold;PSFOR1334-17;-  
 Coleoptera;Eucnemidae;Microrhagus;Microrhagus lepidus;France;Bold;PSFOR320-13;-  
 Coleoptera;Eucnemidae;Microrhagus;Microrhagus lepidus;Norway;Bold;NOCLP1708-19;-  
 Coleoptera;Eucnemidae;Microrhagus;Microrhagus pygmaeus;France;Bold;PSFOR321-13;-  
 Coleoptera;Eucnemidae;Microrhagus;Microrhagus pygmaeus;Norway;Bold;NOCLP1713-19;-  
 Coleoptera;Eucnemidae;Microrhagus;Microrhagus pygmaeus;Norway;Bold;NOCLP1711-19;-  
 Coleoptera;Ptinidae;Mizodorcatoma;Mizodorcatoma dommeri;France;Bold;PSFOR1463-17;-  
 Coleoptera;Mordellidae;Mordellistena;Mordellistena humeralis;Norway;Bold;NOCLP3576-22;-  
 Coleoptera;Mordellidae;Mordellistena;Mordellistena humeralis;Austria;Bold;TDAOE577-21;-  
 Coleoptera;Mordellidae;Mordellistena;Mordellistena humeralis;Norway;Bold;NOCLP3577-22;-  
 Coleoptera;Endomychidae;Mycetina;Mycetina cruciata;France;Bold;PSFOR879-14;-  
 Coleoptera;Endomychidae;Mycetina;Mycetina cruciata;France;Bold;PSFOR235-13;-  
 Coleoptera;Endomychidae;Mycetina;Mycetina cruciata;France;Bold;PSFOR903-14;-  
 Coleoptera;Tenebrionidae;Mycetochara;Mycetochara humeralis;France;Bold;PSFOR210-13;-  
 Coleoptera;Tenebrionidae;Mycetochara;Mycetochara thoracica;France;Bold;PSFOR213-13;-  
 Coleoptera;Mycetophagidae;Mycetophagus;Mycetophagus atomarius;France;Bold;PSFOR185-13;-  
 Coleoptera;Mycetophagidae;Mycetophagus;Mycetophagus decempunctatus;France;Bold;PSFOR186-13;-  
 Coleoptera;Mycetophagidae;Mycetophagus;Mycetophagus fulvicollis;France;Bold;PSFOR466-13;-  
 Coleoptera;Mycetophagidae;Mycetophagus;Mycetophagus multipunctatus;France;Bold;PSFOR354-13;-  
 Coleoptera;Mycetophagidae;Mycetophagus;Mycetophagus piceus;Finland;Bold;COLFD273-12;-  
 Coleoptera;Mycetophagidae;Mycetophagus;Mycetophagus piceus;France;Bold;PSFOR355-13;-  
 Coleoptera;Mycetophagidae;Mycetophagus;Mycetophagus quadripustulatus;France;Bold;PSFOR904-14;-  
 Coleoptera;Mycetophagidae;Mycetophagus;Mycetophagus quadripustulatus;France;Bold;PSFOR352-13;-  
 Coleoptera;Oedemeridae;Nacerdes;Nacerdes carniolica;France;Bold;PSFOR657-13;-  
 Coleoptera;Tenebrionidae;Nalassus;Nalassus alpigradus;France;Bold;PSFOR1555-17;-  
 Coleoptera;Eucnemidae;Nematodes;Nematodes filum;France;Bold;PSFOR1329-17;-  
 Coleoptera;Eucnemidae;Nematodes;Nematodes filum;France;Bold;PSFOR596-13;-  
 Coleoptera;Tenebrionidae;Neomida;Neomida haemorrhoidalis;France;Bold;PSFOR230-13;-  
 Coleoptera;Laemophloeidae;Notolaemus;Notolaemus castaneus;Czech Republic;Bold;PSFOR1361-17;-  
 Coleoptera;Staphylinidae;Nudobius;Nudobius lentus;Norway;Bold;NOCLP3530-22;-  
 Coleoptera;Staphylinidae;Nudobius;Nudobius lentus;Norway;Bold;NOCLP3531-22;-  
 Coleoptera;Cerambycidae;Obrium;Obrium brunneum;France;Bold;PSFOR068-13;-  
 Coleoptera;Cerambycidae;Obrium;Obrium cantharinum;Finland;Bold;COLFA548-12;-  
 Coleoptera;Cerambycidae;Obrium;Obrium cantharinum;France;Bold;PSFOR069-13;-  
 Coleoptera;Cerambycidae;Obrium;Obrium cantharinum;Finland;Bold;COLFA547-12;-  
 Coleoptera;Bothrideridae;Ogmodes;Ogmodes angusticollis;France;Bold;PSFOR1099-17;-  
 Coleoptera;Cleridae;Opilo;Opilo mollis;France;Bold;PSFOR625-13;-  
 Coleoptera;Cleridae;Opilo;Opilo mollis;France;Bold;PSFOR374-13;-  
 Coleoptera;Melandryidae;Orchesia;Orchesia fasciata;France;Bold;PSFOR269-13;-  
 Coleoptera;Melandryidae;Orchesia;Orchesia micans;France;Bold;PSFOR271-13;-  
 Coleoptera;Melandryidae;Orchesia;Orchesia minor;France;Bold;PSFOR909-14;-  
 Coleoptera;Melandryidae;Orchesia;Orchesia undulata;France;Bold;PSFOR365-13;-  
 Coleoptera;Dermestidae;Orphilus;Orphilus niger;France;Bold;PSFOR1274-17;-  
 Coleoptera;Dermestidae;Orphilus;Orphilus niger;France;Bold;PSFOR1273-17;-  
 Coleoptera;Curculionidae;Orthotomicus;Orthotomicus suturalis;Finland;Bold;COLFB225-12;-  
 Coleoptera;Curculionidae;Orthotomicus;Orthotomicus suturalis;Finland;Bold;COLFD139-12;-  
 Coleoptera;Curculionidae;Orthotomicus;Orthotomicus suturalis;Finland;Bold;COLFD140-12;-  
 Coleoptera;Melandryidae;Osphya;Osphya bipunctata;France;Bold;PSFOR1401-17;-  
 Coleoptera;Melandryidae;Osphya;Osphya bipunctata;France;Bold;PSFOR275-13;-  
 Coleoptera;Melandryidae;Osphya;Osphya bipunctata;France;Bold;PSFOR1402-17;-  
 Coleoptera;Melandryidae;Osphya;Osphya bipunctata;France;Bold;PSFOR1398-17;-  
 Coleoptera;Bothrideridae;Oxylaemus;Oxylaemus variolosus;France;Bold;PSFOR1100-17;-  
 Coleoptera;Cerambycidae;Oxymirus;Oxymirus cursor;France;Bold;PSFOR889-14;-  
 Coleoptera;Cerambycidae;Oxymirus;Oxymirus cursor;Finland;Bold;COLFB864-12;-  
 Coleoptera;Cerambycidae;Oxymirus;Oxymirus cursor;Italy;Bold;PSFOR310-13;-  
 Coleoptera;Cerambycidae;Pachyta;Pachyta lamed;Finland;Bold;COLFA495-12;-  
 Coleoptera;Cerambycidae;Pachytodes;Pachytodes cerambyciformis;France;Bold;PSFOR134-13;-  
 Coleoptera;Cerambycidae;Pachytodes;Pachytodes erraticus;France;Bold;PSFOR135-13;-  
 Coleoptera;Tenebrionidae;Palorus;Palorus depressus;France;Bold;PSFOR1540-17;-  
 Coleoptera;Tenebrionidae;Palorus;Palorus depressus;France;Bold;PSFOR1539-17;-  
 Coleoptera;Cerambycidae;Parmena;Parmena unifasciata;France;Bold;PSFOR1132-17;-  
 Coleoptera;Cerambycidae;Parmena;Parmena unifasciata;France;Bold;PSFOR1133-17;-  
 Coleoptera;Histeridae;Paromalus;Paromalus flavicornis;France;Bold;PSFOR479-13;-  
 Coleoptera;Histeridae;Paromalus;Paromalus flavicornis;France;Bold;PSFOR1012-14;-  
 Coleoptera;Cucujidae;Pediacus;Pediacus depressus;France;Bold;PSFOR630-13;-  
 Coleoptera;Cucujidae;Pediacus;Pediacus dermestoides;France;Bold;PSFOR301-13;-  
 Coleoptera;Cucujidae;Pediacus;Pediacus fuscus;Finland;Bold;COLFD282-12;-  
 Coleoptera;Cerambycidae;Penichroa;Penichroa fasciata;France;Bold;PSFOR073-13;-  
 Coleoptera;Tenebrionidae;Pentaphyllus;Pentaphyllus chrysomeloides;France;Bold;PSFOR1533-17;-  
 Coleoptera;Tenebrionidae;Pentaphyllus;Pentaphyllus chrysomeloides;France;Bold;PSFOR231-13;-  
 Coleoptera;Buprestidae;Phaenops;Phaenops cyanea;France;Bold;PSFOR588-13;-

Coleoptera;Cerylonidae;Philothermus;Philothermus semistriatus;France;Bold;PSFOR1140-17;-  
 Coleoptera;Curculionidae;Phloeosinus;Phloeosinus thujae;United Kingdom;Bold;UKAN389-22;-  
 Coleoptera;Phloeostichidae;Phloeostichus;Phloeostichus denticollis;France;Bold;PSFOR905-14;-  
 Coleoptera;Phloeostichidae;Phloeostichus;Phloeostichus denticollis;France;Bold;PSFOR634-13;-  
 Coleoptera;Curculionidae;Phloeotribus;Phloeotribus pubifrons;France;Bold;PSFOR1260-17;-  
 Coleoptera;Curculionidae;Phloeotribus;Phloeotribus spinulosus;Norway;Bold;NOCLP1742-19;-  
 Coleoptera;Staphylinidae;Phyllodrepa;Phyllodrepa melanocephala;Norway;Bold;NOCLP1795-19;-  
 Coleoptera;Staphylinidae;Phyllodrepa;Phyllodrepa nigra;Norway;Bold;NOCLP1794-19;-  
 Coleoptera;Aderidae;Phytobaenus;Phytobaenus amabilis;France;Bold;PSFOR1078-17;-  
 Coleoptera;Curculionidae;Pissodes;Pissodes castaneus;Norway;Bold;NOCLP1416-19;-  
 Coleoptera;Curculionidae;Pissodes;Pissodes piceae;Austria;Bold;TDAAT1093-20;-  
 Coleoptera;Curculionidae;Pissodes;Pissodes pini;Norway;Bold;NOCLP1424-19;-  
 Coleoptera;Curculionidae;Pissodes;Pissodes pini;Norway;Bold;NOCLP1423-19;-  
 Coleoptera;Curculionidae;Pissodes;Pissodes piniphilus;Norway;Bold;NOCLP1417-19;-  
 Coleoptera;Nitidulidae;Pissodes;Pissodes piniphilus;Norway;Bold;NOCLP1418-19;-  
 Coleoptera;Curculionidae;Pissodes;Pissodes validirostris;Norway;Bold;NOCLP1420-19;-  
 Coleoptera;Curculionidae;Pissodes;Pissodes validirostris;Norway;Bold;NOCLP1422-19;-  
 Coleoptera;Curculionidae;Pissodes;Pissodes validirostris;Norway;Bold;NOCLP1421-19;-  
 Coleoptera;Curculionidae;Pityogenes;Pityogenes bidentatus;Norway;Bold;NOCLP1762-19;-  
 Coleoptera;Curculionidae;Pityogenes;Pityogenes chalcographus;Norway;Bold;NOCLP1761-19;-  
 Coleoptera;Curculionidae;Pityogenes;Pityogenes chalcographus;Norway;Bold;NOCLP1760-19;-  
 Coleoptera;Nitidulidae;Pityophagus;Pityophagus ferrugineus;Norway;Bold;NOCLP3138-22;-  
 Coleoptera;Nitidulidae;Pityophagus;Pityophagus ferrugineus;France;Bold;PSFOR490-13;-  
 Coleoptera;Nitidulidae;Pityophagus;Pityophagus laevior;France;Bold;PSFOR803-13;-  
 Coleoptera;Curculionidae;Pityophthorus;Pityophthorus buyssoni;France;Bold;PSFOR1223-17;-  
 Coleoptera;Curculionidae;Pityophthorus;Pityophthorus buyssoni;France;Bold;PSFOR1235-17;-  
 Coleoptera;Curculionidae;Pityophthorus;Pityophthorus buyssoni;France;Bold;PSFOR1236-17;-  
 Coleoptera;Curculionidae;Pityophthorus;Pityophthorus lichtensteinii;Norway;Bold;NOCLP1753-19;-  
 Coleoptera;Curculionidae;Pityophthorus;Pityophthorus pubescens;Norway;Bold;NOCLP1757-19;-  
 Coleoptera;Curculionidae;Pityophthorus;Pityophthorus pubescens;United Kingdom;Bold;UKAN463-22;-  
 Coleoptera;Curculionidae;Pityophthorus;Pityophthorus pubescens;Norway;Bold;NOCLP1755-19;-  
 Coleoptera;Laemophloeidae;Placonotus;Placonotus testaceus;France;Bold;PSFOR312-13;-  
 Coleoptera;Staphylinidae;Placusa;Placusa tachyporoides;Finland;Bold;COLFD128-12;-  
 Coleoptera;Staphylinidae;Placusa;Placusa tachyporoides;Finland;Bold;COLFD127-12;-  
 Coleoptera;Cerambycidae;Plagionotus;Plagionotus detritus;France;Bold;PSFOR075-13;-  
 Coleoptera;Cerambycidae;Plagionotus;Plagionotus detritus;Austria;Bold;TDAAT1085-20;-  
 Coleoptera;Lycidae;Platycis;Platycis minutus;France;Bold;PSFOR641-13;-  
 Coleoptera;Histeridae;Platysoma;Platysoma angustatum;Finland;Bold;COLFD585-12;-  
 Coleoptera;Histeridae;Platysoma;Platysoma angustatum;Finland;Bold;COLFD584-12;-  
 Coleoptera;Histeridae;Platysoma;Platysoma elongatum;France;Bold;PSFOR1354-17;-  
 Coleoptera;Histeridae;Platysoma;Platysoma elongatum;Austria;Bold;TDAAT1937-20;-  
 Coleoptera;Histeridae;Platysoma;Platysoma elongatum;France;Bold;PSFOR495-13;-  
 Coleoptera;Histeridae;Platysoma;Platysoma elongatum;France;Bold;PSFOR1355-17;-  
 Coleoptera;Histeridae;Platysoma;Platysoma filiforme;France;Bold;PSFOR1356-17;-  
 Coleoptera;Histeridae;Platysoma;Platysoma lineare;Finland;Bold;COLFE946-13;-  
 Coleoptera;Anthribidae;Platystomos;Platystomos albinus;France;Bold;PSFOR014-13;-  
 Coleoptera;Anthribidae;Platystomos;Platystomos albinus;Norway;Bold;NOCLP3316-22;-  
 Coleoptera;Anthribidae;Platystomos;Platystomos albinus;France;Bold;PSFOR378-13;-  
 Coleoptera;Anthribidae;Platystomos;Platystomos albinus;Norway;Bold;NOCLP3315-22;-  
 Coleoptera;Histeridae;Plegaderus;Plegaderus vulneratus;Finland;Bold;COLFD132-12;-  
 Coleoptera;Cerambycidae;Pogonocherus;Pogonocherus fasciculatus;Finland;Bold;COLFB883-12;-  
 Coleoptera;Cerambycidae;Pogonocherus;Pogonocherus fasciculatus;France;Bold;PSFOR150-13;-  
 Coleoptera;Cerambycidae;Pogonocherus;Pogonocherus fasciculatus;Finland;Bold;COLFA561-12;-  
 Coleoptera;Cerambycidae;Pogonocherus;Pogonocherus hispidus;Finland;Bold;COLFB895-12;-  
 Coleoptera;Cerambycidae;Pogonocherus;Pogonocherus hispidus;France;Bold;PSFOR152-13;-  
 Coleoptera;Cerambycidae;Pogonocherus;Pogonocherus hispidus;France;Bold;PSFOR309-13;-  
 Coleoptera;Cerambycidae;Pogonocherus;Pogonocherus ovatus;France;Bold;PSFOR908-14;-  
 Coleoptera;Curculionidae;Polygraphus;Polygraphus poligraphus;France;Bold;PSFOR713-13;-  
 Coleoptera;Tenebrionidae;Prionychus;Prionychus fairmairii;France;Bold;PSFOR1522-17;-  
 Coleoptera;Elateridae;Procraerus;Procraerus tibialis;France;Bold;PSFOR341-13;-  
 Coleoptera;Elateridae;Procraerus;Procraerus tibialis;France;Bold;PSFOR977-14;-  
 Coleoptera;Scarabaeidae;Protaetia;Protaetia cuprea;France;Bold;PSFOR907-14;-  
 Coleoptera;Curculionidae;Pselactus;Pselactus spadix;France;Bold;PSFOR1172-17;-  
 Coleoptera;Cerambycidae;Pseudosphegesthes;Pseudosphegesthes cinerea;France;Bold;PSFOR080-13;-  
 Coleoptera;Cerambycidae;Pseudosphegesthes;Pseudosphegesthes cinerea;France;Bold;PSFOR1120-17;-  
 Coleoptera;Bostrichidae;Psoa;Psoa dubia;France;Bold;PSFOR1097-17;-  
 Coleoptera;Curculionidae;Pteleobius;Pteleobius vittatus;France;Bold;PSFOR1224-17;-  
 Coleoptera;Ptiliidae;Ptenidium;Ptenidium nitidum;United Kingdom;Bold;UKAN535-22;-  
 Coleoptera;Cryptophagidae;Pteryngium;Pteryngium crenatum;Finland;Bold;COLFC512-12;-  
 Coleoptera;Ptinidae;Ptilinus;Ptilinus pectinicornis;Austria;Bold;TDAOE412-21;-  
 Coleoptera;Ptinidae;Ptilinus;Ptilinus pectinicornis;Austria;Bold;TDAOE624-21;-  
 Coleoptera;Ptinidae;Ptinomorphus;Ptinomorphus imperialis;France;Bold;PSFOR893-14;-  
 Coleoptera;Ptinidae;Ptinomorphus;Ptinomorphus imperialis;France;Bold;PSFOR380-13;-  
 Coleoptera;Ptinidae;Ptinomorphus;Ptinomorphus imperialis;United Kingdom;Bold;UKAN367-22;-  
 Coleoptera;Ptinidae;Ptinus;Ptinus lichenum;France;Bold;PSFOR684-13;-  
 Coleoptera;Cerambycidae;Purpuricenus;Purpuricenus budensis;France;Bold;PSFOR1121-17;-  
 Coleoptera;Cerambycidae;Purpuricenus;Purpuricenus kaehleri;France;Bold;PSFOR081-13;-  
 Coleoptera;Lycidae;Pyropterus;Pyropterus nigroruber;France;Bold;PSFOR642-13;-

Coleoptera;Staphylinidae;Quedius;Quedius cruentus;Norway;Bold;NOCLP3205-22;-  
 Coleoptera;Staphylinidae;Quedius;Quedius cruentus;Norway;Bold;NOCLP3206-22;-  
 Coleoptera;Staphylinidae;Quedius;Quedius cruentus;United Kingdom;Bold;UKAN431-22;-  
 Coleoptera;Staphylinidae;Quedius;Quedius microps;Finland;Bold;COLFG224-13;-  
 Coleoptera;Staphylinidae;Quedius;Quedius xanthopus;Norway;Bold;NOCLP3209-22;-  
 Coleoptera;Anthribidae;Rhaphitropis;Rhaphitropis marchicus;France;Bold;PSFOR1086-17;-  
 Coleoptera;Monotomidae;Rhizophagus;Rhizophagus bipustulatus;France;Bold;PSFOR858-14;-  
 Coleoptera;Monotomidae;Rhizophagus;Rhizophagus bipustulatus;France;Bold;PSFOR857-14;-  
 Coleoptera;Monotomidae;Rhizophagus;Rhizophagus bipustulatus;France;Bold;PSFOR1046-14;-  
 Coleoptera;Monotomidae;Rhizophagus;Rhizophagus bipustulatus;United Kingdom;Bold;UKAN528-22;-  
 Coleoptera;Monotomidae;Rhizophagus;Rhizophagus bipustulatus;France;Bold;PSFOR567-13;-  
 Coleoptera;Monotomidae;Rhizophagus;Rhizophagus dispar;France;Bold;PSFOR563-13;-  
 Coleoptera;Monotomidae;Rhizophagus;Rhizophagus dispar;United Kingdom;Bold;UKAN504-22;-  
 Coleoptera;Monotomidae;Rhizophagus;Rhizophagus ferrugineus;France;Bold;PSFOR562-13;-  
 Coleoptera;Monotomidae;Rhizophagus;Rhizophagus nitidulus;France;Bold;PSFOR1390-17;-  
 Coleoptera;Monotomidae;Rhizophagus;Rhizophagus parvulus;France;Bold;PSFOR570-13;-  
 Coleoptera;Monotomidae;Rhizophagus;Rhizophagus perforatus;France;Bold;PSFOR856-14;-  
 Coleoptera;Monotomidae;Rhizophagus;Rhizophagus unicolor;France;Bold;PSFOR860-14;-  
 Coleoptera;Monotomidae;Rhizophagus;Rhizophagus unicolor;France;Bold;PSFOR1392-17;-  
 Coleoptera;Curculionidae;Rhyncolus;Rhyncolus ater;Norway;Bold;NOCLP1406-19;-  
 Coleoptera;Cerambycidae;Ropalopus;Ropalopus ungaricus;Slovakia;Bold;PSFOR1122-17;-  
 Coleoptera;Cerambycidae;Rutpela;Rutpela maculata;France;Bold;PSFOR006-13;-  
 Coleoptera;Salpingidae;Salpingus;Salpingus planirostris;France;Bold;PSFOR347-13;-  
 Coleoptera;Salpingidae;Salpingus;Salpingus planirostris;United Kingdom;Bold;UKAN355-22;-  
 Coleoptera;Salpingidae;Salpingus;Salpingus planirostris;United Kingdom;Bold;UKAN460-22;-  
 Coleoptera;Cerambycidae;Saperda;Saperda carcharias;Finland;Bold;COLFA377-12;-  
 Coleoptera;Cerambycidae;Saperda;Saperda perforata;Finland;Bold;LEFIJ1888-13;-  
 Coleoptera;Cerambycidae;Saperda;Saperda scalaris;Finland;Bold;LEFIJ1986-13;-  
 Coleoptera;Bostrichidae;Scobicia;Scobicia chevrieri;France;Bold;PSFOR612-13;-  
 Coleoptera;Bostrichidae;Scobicia;Scobicia pustulata;France;Bold;PSFOR613-13;-  
 Coleoptera;Curculionidae;Scolytus;Scolytus carpini;France;Bold;PSFOR1225-17;-  
 Coleoptera;Curculionidae;Scolytus;Scolytus intricatus;France;Bold;PSFOR1073-14;-  
 Coleoptera;Curculionidae;Scolytus;Scolytus intricatus;Norway;Bold;NOCLP1747-19;-  
 Coleoptera;Curculionidae;Scolytus;Scolytus koenigi;France;Bold;PSFOR1226-17;-  
 Coleoptera;Curculionidae;Scolytus;Scolytus rugulosus;Norway;Bold;NOCLP1748-19;-  
 Coleoptera;Curculionidae;Scolytus;Scolytus rugulosus;United Kingdom;Bold;UKAN381-22;-  
 Coleoptera;Melandryidae;Serropalpus;Serropalpus barbatus;Italy;Bold;PSFOR279-13;-  
 Coleoptera;Staphylinidae;Siagonium;Siagonium quadricorne;United Kingdom;Bold;UKAN526-22;-  
 Coleoptera;Silvanidae;Silvanoprus;Silvanoprus fagi;Finland;Bold;COLFB250-12;-  
 Coleoptera;Silvanidae;Silvanoprus;Silvanoprus fagi;France;Bold;PSFOR302-13;-  
 Coleoptera;Silvanidae;Silvanus;Silvanus bidentatus;France;Bold;PSFOR1031-14;-  
 Coleoptera;Lucanidae;Sinodendron;Sinodendron cylindricum;Finland;Bold;COLFG079-13;-  
 Coleoptera;Lucanidae;Sinodendron;Sinodendron cylindricum;Finland;Bold;COLFA129-10;-  
 Coleoptera;Nitidulidae;Soronina;Soronina grisea;France;Bold;PSFOR1074-14;-  
 Coleoptera;Nitidulidae;Soronina;Soronina grisea;France;Bold;PSFOR290-13;-  
 Coleoptera;Nitidulidae;Soronina;Soronina grisea;Norway;Bold;NOCLP3134-22;-  
 Coleoptera;Nitidulidae;Soronina;Soronina grisea;Norway;Bold;NOCLP3133-22;-  
 Coleoptera;Nitidulidae;Soronina;Soronina oblonga;France;Bold;PSFOR648-13;-  
 Coleoptera;Nitidulidae;Soronina;Soronina oblonga;France;Bold;PSFOR1413-17;-  
 Coleoptera;Nitidulidae;Soronina;Soronina punctatissima;Finland;Bold;COLFE930-13;-  
 Coleoptera;Nitidulidae;Soronina;Soronina punctatissima;France;Bold;PSFOR916-14;-  
 Coleoptera;Nitidulidae;Soronina;Soronina punctatissima;France;Bold;PSFOR649-13;-  
 Coleoptera;Sphindidae;Sphindus;Sphindus dubius;France;Bold;PSFOR667-13;-  
 Coleoptera;Ptinidae;Stagetus;Stagetus byrrhoides;France;Bold;PSFOR1462-17;-  
 Coleoptera;Ptinidae;Stagetus;Stagetus elongatus;France;Bold;PSFOR1467-17;-  
 Coleoptera;Elateridae;Stenagostus;Stenagostus rhombeus;France;Bold;PSFOR947-14;-  
 Coleoptera;Elateridae;Stenagostus;Stenagostus rhombeus;France;Bold;PSFOR331-13;-  
 Coleoptera;Elateridae;Stenagostus;Stenagostus rhombeus;France;Bold;PSFOR760-13;-  
 Coleoptera;Cerambycidae;Stenocorus;Stenocorus meridianus;France;Bold;PSFOR092-13;-  
 Coleoptera;Tenebrionidae;Stenomax;Stenomax aeneus;France;Bold;PSFOR224-13;-  
 Coleoptera;Tenebrionidae;Stenomax;Stenomax aeneus;France;Bold;PSFOR1035-14;-  
 Coleoptera;Tenebrionidae;Stenomax;Stenomax aeneus;Austria;Bold;TDAAT1091-20;-  
 Coleoptera;Tenebrionidae;Stenomax;Stenomax aeneus;Austria;Bold;TDAOE325-21;-  
 Coleoptera;Cerambycidae;Stenostola;Stenostola dubia;France;Bold;PSFOR157-13;-  
 Coleoptera;Cerambycidae;Stenurella;Stenurella sennii;France;Bold;PSFOR1136-17;-  
 Coleoptera;Cerambycidae;Stenurella;Stenurella sennii;France;Bold;PSFOR1137-17;-  
 Coleoptera;Bostrichidae;Stephanopachys;Stephanopachys linearis;Finland;Bold;COLFD280-12;-  
 Coleoptera;Cerambycidae;Stictoleptura;Stictoleptura cordigera;France;Bold;PSFOR094-13;-  
 Coleoptera;Anamorphidae;Symbiotes;Symbiotes gibberosus;France;Bold;PSFOR632-13;-  
 Coleoptera;Anamorphidae;Symbiotes;Symbiotes latus;France;Bold;PSFOR633-13;-  
 Coleoptera;Curculionidae;Taphrorychus;Taphrorychus bicolor;Austria;Bold;TDAOE340-21;-  
 Coleoptera;Curculionidae;Taphrorychus;Taphrorychus villifrons;France;Bold;PSFOR419-13;-  
 Coleoptera;Curculionidae;Taphrorychus;Taphrorychus villifrons;France;Bold;PSFOR418-13;-  
 Coleoptera;Tenebrionidae;Tenebrio;Tenebrio obscurus;France;Bold;PSFOR1537-17;-  
 Coleoptera;Tenebrionidae;Tenebrio;Tenebrio punctipennis;Spain;Bold;PSFOR1541-17;-  
 Coleoptera;Tenebrionidae;Tenebrio;Tenebrio punctipennis;Spain;Bold;PSFOR1542-17;-  
 Coleoptera;Trogossitidae;Tenebroides;Tenebroides fuscus;France;Bold;PSFOR1037-14;-  
 Coleoptera;Histeridae;Teretrius;Teretrius parasita;France;Bold;PSFOR1351-17;-

Coleoptera;Tetratomidae;Tetratoma;Tetratoma ancora;France;Bold;PSFOR912-14;-  
 Coleoptera;Tetratomidae;Tetratoma;Tetratoma ancora;France;Bold;PSFOR292-13;-  
 Coleoptera;Tetratomidae;Tetratoma;Tetratoma ancora;France;Bold;PSFOR291-13;-  
 Coleoptera;Tetratomidae;Tetratoma;Tetratoma ancora;France;Bold;PSFOR486-13;-  
 Coleoptera;Tetratomidae;Tetratoma;Tetratoma fungorum;Finland;Bold;COLFB496-12;-  
 Coleoptera;Cerambycidae;Tetropium;Tetropium castaneum;Russia;Bold;VVGPL2876-15;-  
 Coleoptera;Cerambycidae;Tetropium;Tetropium castaneum;Russia;Bold;VVGPL2878-15;-  
 Coleoptera;Cerambycidae;Tetropium;Tetropium castaneum;Russia;Bold;VVGPL2877-15;-  
 Coleoptera;Cleridae;Thanasimus;Thanasimus formicarius;France;Bold;PSFOR372-13;-  
 Coleoptera;Cleridae;Thanasimus;Thanasimus formicarius;France;Bold;PSFOR1064-14;-  
 Coleoptera;Curculionidae;Tomicus;Tomicus minor;Norway;Bold;NOCLP3342-22;-  
 Coleoptera;Curculionidae;Tomicus;Tomicus minor;Norway;Bold;NOCLP3343-22;-  
 Coleoptera;Curculionidae;Tomicus;Tomicus piniperda;France;Bold;PSFOR718-13;-  
 Coleoptera;Mordellidae;Tomoxia;Tomoxia bucephala;Finland;Bold;COLFG081-13;-  
 Coleoptera;Rhadalidae;Trichoceble;Trichoceble floralis;France;Bold;PSFOR1389-17;-  
 Coleoptera;Rhadalidae;Trichoceble;Trichoceble floralis;France;Bold;PSFOR1388-17;-  
 Coleoptera;Cerambycidae;Trichoferus;Trichoferus fasciculatus;France;Bold;PSFOR1123-17;-  
 Coleoptera;Cerambycidae;Trichoferus;Trichoferus pallidus;France;Bold;PSFOR016-13;-  
 Coleoptera;Erotylidae;Triplax;Triplax aenea;France;Bold;PSFOR598-13;-  
 Coleoptera;Erotylidae;Triplax;Triplax collaris;France;Bold;PSFOR599-13;-  
 Coleoptera;Erotylidae;Triplax;Triplax lepida;France;Bold;PSFOR601-13;-  
 Coleoptera;Erotylidae;Triplax;Triplax lepida;France;Bold;PSFOR998-14;-  
 Coleoptera;Erotylidae;Triplax;Triplax melanocephala;France;Bold;PSFOR1326-17;-  
 Coleoptera;Erotylidae;Triplax;Triplax melanocephala;France;Bold;PSFOR602-13;-  
 Coleoptera;Erotylidae;Triplax;Triplax rufipes;France;Bold;PSFOR603-13;-  
 Coleoptera;Erotylidae;Triplax;Triplax russica;France;Bold;PSFOR604-13;-  
 Coleoptera;Erotylidae;Triplax;Triplax russica;Finland;Bold;COLFC696-12;-  
 Coleoptera;Erotylidae;Tritoma;Tritoma bipustulata;France;Bold;PSFOR323-13;-  
 Coleoptera;Throscidae;Trixagus;Trixagus atticus;Austria;Bold;TDAAT876-20;-  
 Coleoptera;Anthribidae;Tropideres;Tropideres albirostris;France;Bold;PSFOR011-13;-  
 Coleoptera;Curculionidae;Trypodendron;Trypodendron domesticum;Norway;Bold;NOCLP1784-19;-  
 Coleoptera;Curculionidae;Trypodendron;Trypodendron lineatum;Norway;Bold;NOCLP1782-19;-  
 Coleoptera;Mycetophagidae;Typhaea;Typhaea stercorea;Finland;Bold;COLFB406-12;-  
 Coleoptera;Mycetophagidae;Typhaea;Typhaea stercorea;Finland;Bold;COLFB408-12;-  
 Coleoptera;Mycetophagidae;Typhaea;Typhaea stercorea;Finland;Bold;COLFB407-12;-  
 Coleoptera;Mycetophagidae;Typhaea;Typhaea stercorea;France;Bold;PSFOR190-13;-  
 Coleoptera;Tenebrionidae;Uloma;Uloma rufa;France;Bold;PSFOR228-13;-  
 Coleoptera;Scarabaeidae;Valgus;Valgus hemipterus;Austria;Bold;TDAAT465-19;-  
 Coleoptera;Scarabaeidae;Valgus;Valgus hemipterus;Austria;Bold;TDAAT1989-20;-  
 Coleoptera;Scarabaeidae;Valgus;Valgus hemipterus;France;Bold;PSFOR247-13;-  
 Coleoptera;Salpingidae;Vincenzellus;Vincenzellus ruficollis;France;Bold;PSFOR461-13;-  
 Coleoptera;Salpingidae;Vincenzellus;Vincenzellus ruficollis;France;Bold;PSFOR013-13;-  
 Coleoptera;Curculionidae;Xyleborinus;Xyleborinus saxesenii;Norway;Bold;NOCLP1776-19;-  
 Coleoptera;Curculionidae;Xyleborus;Xyleborus cryptographus;France;Bold;PSFOR720-13;-  
 Coleoptera;Curculionidae;Xyleborus;Xyleborus cryptographus;Germany;Bold;SCOLY263-11;-  
 Coleoptera;Curculionidae;Xyleborus;Xyleborus monographus;Norway;Bold;NOCLP1790-19;-  
 Coleoptera;Curculionidae;Xylechinus;Xylechinus pilosus;Finland;Bold;COLFC351-12;-  
 Coleoptera;Curculionidae;Xylechinus;Xylechinus pilosus;Finland;Bold;COLFC352-12;-  
 Coleoptera;Melandryidae;Xylita;Xylita laevigata;France;Bold;PSFOR281-13;-  
 Coleoptera;Bostrichidae;Xylopertha;Xylopertha praeusta;France;Bold;PSFOR616-13;-  
 Coleoptera;Bostrichidae;Xylopertha;Xylopertha praeusta;France;Bold;PSFOR812-13;-  
 Coleoptera;Bostrichidae;Xylopertha;Xylopertha praeusta;France;Bold;PSFOR1094-17;-  
 Coleoptera;Bostrichidae;Xylopertha;Xylopertha retusa;France;Bold;PSFOR617-13;-  
 Coleoptera;Bostrichidae;Xylopertha;Xylopertha retusa;France;Bold;PSFOR992-14;-  
 Coleoptera;Eucnemidae;Xylophilus;Xylophilus corticalis;France;Bold;PSFOR869-14;-  
 Coleoptera;Eucnemidae;Xylophilus;Xylophilus corticalis;France;Bold;PSFOR597-13;-  
 Coleoptera;Eucnemidae;Xylophilus;Xylophilus corticalis;France;Bold;PSFOR1338-17;-  
 Coleoptera;Eucnemidae;Xylophilus;Xylophilus testaceus;Czech Republic;Bold;PSFOR1337-17;-  
 Coleoptera;Cerambycidae;Xylotrechus;Xylotrechus antilope;France;Bold;PSFOR024-13;-  
 Coleoptera;Cerambycidae;Xylotrechus;Xylotrechus antilope;France;Bold;PSFOR169-13;-  
 Coleoptera;Cerambycidae;Xylotrechus;Xylotrechus arvicola;France;Bold;PSFOR170-13;-  
 Coleoptera;Cerambycidae;Xylotrechus;Xylotrechus arvicola;France;Bold;PSFOR019-13;-  
 ;;;;  
 ;;;;

Appendix\_4\_DataRemoved\_after\_CoordinateCleanerCheck;;;;;

| order_name  | family_name  | genus_name   | species_name            | country        | sourceDatabase | processid    | genbank_accession |
|-------------|--------------|--------------|-------------------------|----------------|----------------|--------------|-------------------|
| Hymenoptera | Apidae       | Andrena      | Andrena hattorfiana     | Croatia        | GenBank        | -            | KJ838690          |
| Hymenoptera | Apidae       | Andrena      | Andrena hattorfiana     | Turkey         | GenBank        | -            | KJ839559          |
| Hymenoptera | Apidae       | Andrena      | Andrena hattorfiana     | Finland        | GenBank        | -            | MZ623535          |
| Hymenoptera | Apidae       | Andrena      | Andrena hattorfiana     | Austria        | Bold           | ABEE162-17   | -                 |
| Hymenoptera | Apidae       | Andrena      | Andrena ovatula         | Austria        | Bold           | ABEE140-17   | -                 |
| Hymenoptera | Apidae       | Andrena      | Andrena ovatula         | United Kingdom | Bold           | BEEEE144-15  | -                 |
| Hymenoptera | Colletidae   | Colletes     | Colletes floralis       | Norway         | Bold           | NOBEE044-09  | -                 |
| Hymenoptera | Colletidae   | Colletes     | Colletes fodiens        | United Kingdom | GenBank        | -            | KT074041          |
| Hymenoptera | Colletidae   | Colletes     | Colletes fodiens        | France         | GenBank        | -            | MT869551          |
| Hymenoptera | Colletidae   | Colletes     | Colletes fodiens        | United Kingdom | Bold           | BEEEE216-15  | -                 |
| Hymenoptera | Colletidae   | Colletes     | Colletes succinctus     | United Kingdom | Bold           | BEEEE139-15  | -                 |
| Hymenoptera | Apidae       | Epeolus      | Epeolus cruciger        | Finland        | GenBank        | -            | MZ625426          |
| Hymenoptera | Apidae       | Epeolus      | Epeolus cruciger        | Norway         | Bold           | NOBEE071-09  | -                 |
| Hymenoptera | Apidae       | Epeolus      | Epeolus cruciger        | Norway         | Bold           | NOBEE070-09  | -                 |
| Hymenoptera | Halictidae   | Halictus     | Halictus quadricinctus  | Spain          | GenBank        | -            | KJ839292          |
| Hymenoptera | Halictidae   | Lasioglossum | Lasioglossum clypeare   | Austria        | Bold           | ABEE225-17   | -                 |
| Hymenoptera | Halictidae   | Lasioglossum | Lasioglossum costulatum | Croatia        | GenBank        | -            | KJ839220          |
| Hymenoptera | Halictidae   | Lasioglossum | Lasioglossum costulatum | Croatia        | GenBank        | -            | KJ839709          |
| Hymenoptera | Halictidae   | Lasioglossum | Lasioglossum xanthopus  | Turkey         | GenBank        | -            | KJ836625          |
| Hymenoptera | Halictidae   | Sphecodes    | Sphecodes cristatus     | Austria        | Bold           | ABEE080-17   | -                 |
| Hymenoptera | Apidae       | Triepeolus   | Triepeolus tristis      | Macedonia      | GenBank        | -            | MN342316          |
| Lepidoptera | Nymphalidae  | Erebia       | Erebia aethiops         | Russia         | Bold           | GBLN1217-08  | AB324833          |
| Lepidoptera | Pieridae     | Anthocharis  | Anthocharis cardamines  | Spain          | Bold           | GBGL4379-07  | AM262796          |
| Lepidoptera | Papilionidae | Parnassius   | Parnassius apollo       | Finland        | GenBank        | -            | AY346254          |
| Lepidoptera | Papilionidae | Iphiclidus   | Iphiclidus podalirius   | Greece         | GenBank        | -            | AY556868          |
| Lepidoptera | Lycaenidae   | Lampides     | Lampides boeticus       | Turkey         | GenBank        | -            | AY557016          |
| Lepidoptera | Lycaenidae   | Aricia       | Aricia agestis          | Turkey         | GenBank        | -            | AY557031          |
| Lepidoptera | Lycaenidae   | Lysandra     | Polyommatus bellargus   | Turkey         | GenBank        | -            | AY557102          |
| Lepidoptera | Nymphalidae  | Maniola      | Maniola jurtina         | Netherlands    | GenBank        | -            | DQ008088          |
| Lepidoptera | Lycaenidae   | Cupido       | Cupido osiris           | Ukraine        | GenBank        | -            | FJ663445          |
| Lepidoptera | Nymphalidae  | Maniola      | Maniola jurtina         | Ukraine        | GenBank        | -            | FJ663756          |
| Lepidoptera | Nymphalidae  | Melanargia   | Melanargia galathea     | Ukraine        | GenBank        | -            | FJ663761          |
| Lepidoptera | Nymphalidae  | Melanargia   | Melanargia galathea     | Ukraine        | GenBank        | -            | FJ663762          |
| Lepidoptera | Lycaenidae   | Polyommatus  | Polyommatus daphnis     | Ukraine        | GenBank        | -            | FJ663769          |
| Lepidoptera | Lycaenidae   | Polyommatus  | Polyommatus daphnis     | Ukraine        | GenBank        | -            | FJ663770          |
| Lepidoptera | Lycaenidae   | Polyommatus  | Polyommatus daphnis     | Ukraine        | GenBank        | -            | FJ663771          |
| Lepidoptera | Lycaenidae   | Polyommatus  | Polyommatus daphnis     | Ukraine        | GenBank        | -            | FJ663772          |
| Lepidoptera | Lycaenidae   | Polyommatus  | Polyommatus daphnis     | Ukraine        | GenBank        | -            | FJ663773          |
| Lepidoptera | Lycaenidae   | Plebejus     | Plebejus argus          | Ukraine        | GenBank        | -            | FJ663951          |
| Lepidoptera | Lycaenidae   | Plebejus     | Plebejus argus          | Ukraine        | GenBank        | -            | FJ663952          |
| Lepidoptera | Lycaenidae   | Polyommatus  | Polyommatus icarus      | Germany        | GenBank        | -            | GU655005          |
| Lepidoptera | Nymphalidae  | Coenonympha  | Coenonympha pamphilus   | Germany        | GenBank        | -            | GU655020          |
| Lepidoptera | Hesperiidae  | Muschampia   | Sloperia proto          | Spain          | GenBank        | -            | GU662046          |
| Lepidoptera | Hesperiidae  | Muschampia   | Sloperia proto          | Spain          | GenBank        | -            | GU662047          |
| Lepidoptera | Nymphalidae  | Coenonympha  | Coenonympha pamphilus   | Spain          | GenBank        | -            | GU668039          |
| Lepidoptera | Nymphalidae  | Erebia       | Erebia manto            | Romania        | Bold           | EZROM1060-09 | GU669649          |
| Lepidoptera | Nymphalidae  | Erebia       | Erebia manto            | Romania        | Bold           | EZROM1061-09 | GU669650          |
| Lepidoptera | Pieridae     | Pieris       | Pieris mannii           | Spain          | GenBank        | -            | GU669674          |
| Lepidoptera | Hesperiidae  | Ochlodes     | Ochlodes sylvanus       | Spain          | GenBank        | -            | GU669692          |
| Lepidoptera | Nymphalidae  | Erebia       | Erebia manto            | Spain          | GenBank        | -            | GU669838          |
| Lepidoptera | Nymphalidae  | Erebia       | Erebia manto            | Spain          | GenBank        | -            | GU669840          |
| Lepidoptera | Nymphalidae  | Erebia       | Erebia manto            | Spain          | GenBank        | -            | GU669841          |
| Lepidoptera | Nymphalidae  | Erebia       | Erebia manto            | Spain          | GenBank        | -            | GU669842          |
| Lepidoptera | Nymphalidae  | Erebia       | Erebia manto            | Spain          | GenBank        | -            | GU669843          |
| Lepidoptera | Nymphalidae  | Vanessa      | Vanessa cardui          | Spain          | GenBank        | -            | GU669857          |
| Lepidoptera | Lycaenidae   | Leptotes     | Leptotes pirithous      | Spain          | GenBank        | -            | GU675655          |
| Lepidoptera | Nymphalidae  | Danaus       | Danaus chrysippus       | Spain          | GenBank        | -            | GU675765          |
| Lepidoptera | Nymphalidae  | Danaus       | Danaus chrysippus       | Spain          | GenBank        | -            | GU675948          |
| Lepidoptera | Nymphalidae  | Pyronia      | Pyronia cecilia         | Spain          | Bold           | EZSPM069-09  | GU676027          |
| Lepidoptera | Nymphalidae  | Coenonympha  | Coenonympha pamphilus   | Spain          | GenBank        | -            | GU676033          |
| Lepidoptera | Lycaenidae   | Polyommatus  | Polyommatus icarus      | Spain          | Bold           | EZSPN446-09  | GU676593          |
| Lepidoptera | Nymphalidae  | Vanessa      | Vanessa cardui          | Spain          | GenBank        | -            | GU676594          |
| Lepidoptera | Nymphalidae  | Vanessa      | Vanessa atalanta        | Spain          | GenBank        | -            | GU676595          |
| Lepidoptera | Pieridae     | Colias       | Colias crocea           | Spain          | Bold           | EZSPN449-09  | GU676596          |
| Lepidoptera | Lycaenidae   | Celastrina   | Celastrina argiolus     | Spain          | GenBank        | -            | GU676712          |
| Lepidoptera | Lycaenidae   | Polyommatus  | Polyommatus icarus      | Spain          | Bold           | EZSPN314-09  | GU676726          |
| Lepidoptera | Lycaenidae   | Lycaena      | Lycaena phlaeas         | Spain          | GenBank        | -            | GU676727          |
| Lepidoptera | Pieridae     | Pontia       | Pieris daplidice        | Spain          | GenBank        | -            | GU676728          |
| Lepidoptera | Lycaenidae   | Celastrina   | Celastrina argiolus     | Spain          | GenBank        | -            | GU676729          |
| Lepidoptera | Pieridae     | Gonepteryx   | Gonepteryx cleopatra    | Spain          | GenBank        | -            | GU676730          |
| Lepidoptera | Nymphalidae  | Coenonympha  | Coenonympha pamphilus   | Spain          | GenBank        | -            | GU676731          |
| Lepidoptera | Nymphalidae  | Coenonympha  | Coenonympha pamphilus   | Spain          | GenBank        | -            | GU676732          |
| Lepidoptera | Nymphalidae  | Vanessa      | Vanessa cardui          | Spain          | GenBank        | -            | GU676733          |
| Lepidoptera | Nymphalidae  | Vanessa      | Vanessa atalanta        | Spain          | GenBank        | -            | GU676735          |
| Lepidoptera | Pieridae     | Pieris       | Pieris rapae            | Spain          | GenBank        | -            | GU676736          |

Lepidoptera; Pieridae; Pieris; Pieris brassicae; Spain; GenBank; -; GU676737  
 Lepidoptera; Nymphalidae; Pararge; Pararge aegeria; Spain; GenBank; -; GU676738  
 Lepidoptera; Nymphalidae; Vanessa; Vanessa atalanta; Spain; GenBank; -; GU676742  
 Lepidoptera; Pieridae; Euphydryas; Euphydryas alcon; Spain; GenBank; -; GU676783  
 Lepidoptera; Lycaenidae; Phengaris; Maculinea alcon; Spain; GenBank; -; GU676918  
 Lepidoptera; Lycaenidae; Phengaris; Maculinea alcon; Spain; GenBank; -; GU676921  
 Lepidoptera; Lycaenidae; Lysandra; Polyommatus coridon; Spain; GenBank; -; GU677024  
 Lepidoptera; Lycaenidae; Lysandra; Polyommatus coridon; Spain; GenBank; -; GU677027  
 Lepidoptera; Hesperidae; Pyrgus; Pyrgus malvae; Finland; Bold; LEFIA1335-10; GU828583  
 Lepidoptera; Lycaenidae; Polyommatus; Polyommatus icarus; Turkey; GenBank; -; HM116940  
 Lepidoptera; Nymphalidae; Boloria; Boloria thore; Finland; GenBank; -; HM386883  
 Lepidoptera; Nymphalidae; Boloria; Boloria thore; Finland; GenBank; -; HM386884  
 Lepidoptera; Nymphalidae; Boloria; Boloria napaea; Finland; GenBank; -; HM386890  
 Lepidoptera; Lycaenidae; Favonius; Favonius quercus; Finland; Bold; LEFIB001-10; HM870914  
 Lepidoptera; Papilionidae; Papilio; Papilio machaon; Finland; GenBank; -; HM871158  
 Lepidoptera; Nymphalidae; Melitaea; Melitaea cinxia; Finland; GenBank; -; HM871218  
 Lepidoptera; Hesperidae; Pyrgus; Pyrgus malvae; Finland; GenBank; -; HM871219  
 Lepidoptera; Lycaenidae; Favonius; Favonius quercus; Finland; Bold; LEFIB330-10; HM871230  
 Lepidoptera; Lycaenidae; Lycaena; Lycaena phlaeas; Finland; GenBank; -; HM872111  
 Lepidoptera; Lycaenidae; Glaucopsyche; Glaucopsyche alexis; Finland; GenBank; -; HM872188  
 Lepidoptera; Nymphalidae; Apatura; Apatura iris; Finland; GenBank; -; HM872958  
 Lepidoptera; Nymphalidae; Apatura; Apatura ilia; Finland; GenBank; -; HM872960  
 Lepidoptera; Hesperidae; Pyrgus; Pyrgus alveus; Finland; GenBank; -; HM873490  
 Lepidoptera; Hesperidae; Hesperia; Hesperia comma; Finland; GenBank; -; HM873567  
 Lepidoptera; Nymphalidae; Hipparchia; Hipparchia semele; Finland; GenBank; -; HM873568  
 Lepidoptera; Nymphalidae; Maniola; Maniola jurtina; Finland; GenBank; -; HM873571  
 Lepidoptera; Nymphalidae; Coenonympha; Coenonympha pamphilus; Finland; GenBank; -; HM874610  
 Lepidoptera; Lycaenidae; Lycaena; Lycaena phlaeas; Finland; GenBank; -; HM874632  
 Lepidoptera; Pieridae; Pontia; Pieris edusa; Finland; GenBank; -; HM874820  
 Lepidoptera; Pieridae; Pontia; Pieris edusa; Finland; GenBank; -; HM874821  
 Lepidoptera; Nymphalidae; Issoria; Issoria lathonia; Finland; GenBank; -; HM876030  
 Lepidoptera; Nymphalidae; Coenonympha; Coenonympha pamphilus; Finland; GenBank; -; HM876033  
 Lepidoptera; Nymphalidae; Melitaea; Melitaea didyma; Spain; GenBank; -; HM901283  
 Lepidoptera; Nymphalidae; Fabriciana; Argynnis niobe; Spain; GenBank; -; HM901284  
 Lepidoptera; Lycaenidae; Lycaena; Lycaena alciphron; Spain; GenBank; -; HM901285  
 Lepidoptera; Nymphalidae; Melanargia; Melanargia russiae; Spain; GenBank; -; HM901286  
 Lepidoptera; Nymphalidae; Brenthis; Brenthis hecate; Spain; GenBank; -; HM901287  
 Lepidoptera; Nymphalidae; Brenthis; Brenthis hecate; Spain; GenBank; -; HM901288  
 Lepidoptera; Hesperidae; Geyneria; Geyneria nostrodamus; Spain; GenBank; -; HM901311  
 Lepidoptera; Nymphalidae; Erebia; Erebia manto; Spain; GenBank; -; HM901318  
 Lepidoptera; Nymphalidae; Melanargia; Melanargia russiae; Spain; GenBank; -; HM901383  
 Lepidoptera; Nymphalidae; Coenonympha; Coenonympha pamphilus; Spain; GenBank; -; HM901569  
 Lepidoptera; Hesperidae; Thymelicus; Thymelicus sylvestris; Spain; GenBank; -; HM901574  
 Lepidoptera; Nymphalidae; Argynnis; Argynnis pandora; Spain; GenBank; -; HM901577  
 Lepidoptera; Nymphalidae; Aglais; Aglais urticae; Spain; Bold; EZSPC769-10; HM901624  
 Lepidoptera; Nymphalidae; Pararge; Pararge aegeria; Spain; GenBank; -; HM901648  
 Lepidoptera; Lycaenidae; Polyommatus; Polyommatus icarus; Spain; GenBank; -; HM901649  
 Lepidoptera; Lycaenidae; Lysandra; Polyommatus coridon; Spain; GenBank; -; HM901660  
 Lepidoptera; Lycaenidae; Lysandra; Polyommatus coridon; Spain; GenBank; -; HM901661  
 Lepidoptera; Nymphalidae; Boloria; Boloria titania; Romania; GenBank; -; HQ004108  
 Lepidoptera; Nymphalidae; Boloria; Boloria titania; Romania; GenBank; -; HQ004109  
 Lepidoptera; Nymphalidae; Boloria; Boloria titania; Romania; GenBank; -; HQ004110  
 Lepidoptera; Nymphalidae; Boloria; Boloria titania; Romania; GenBank; -; HQ004111  
 Lepidoptera; Nymphalidae; Erebia; Erebia manto; Romania; GenBank; -; HQ004405  
 Lepidoptera; Nymphalidae; Erebia; Erebia manto; Romania; GenBank; -; HQ004406  
 Lepidoptera; Nymphalidae; Erebia; Erebia manto; Romania; GenBank; -; HQ004407  
 Lepidoptera; Nymphalidae; Erebia; Erebia manto; Romania; GenBank; -; HQ004408  
 Lepidoptera; Nymphalidae; Erebia; Erebia manto; Romania; GenBank; -; HQ004409  
 Lepidoptera; Nymphalidae; Erebia; Erebia manto; Romania; GenBank; -; HQ004410  
 Lepidoptera; Nymphalidae; Erebia; Erebia manto; Romania; GenBank; -; HQ004411  
 Lepidoptera; Nymphalidae; Erebia; Erebia manto; Romania; GenBank; -; HQ004412  
 Lepidoptera; Nymphalidae; Erebia; Erebia manto; Romania; GenBank; -; HQ004413  
 Lepidoptera; Nymphalidae; Erebia; Erebia pharte; Romania; GenBank; -; HQ004435  
 Lepidoptera; Nymphalidae; Erebia; Erebia pharte; Romania; GenBank; -; HQ004436  
 Lepidoptera; Nymphalidae; Nymphalis; Nymphalis polychloros; Romania; GenBank; -; HQ004866  
 Lepidoptera; Nymphalidae; Boloria; Boloria napaea; Finland; GenBank; -; HQ570285  
 Lepidoptera; Nymphalidae; Boloria; Boloria thore; Finland; GenBank; -; HQ570286  
 Lepidoptera; Nymphalidae; Erebia; Erebia medusa; Finland; Bold; LEFIF127-10; HQ570388  
 Lepidoptera; Nymphalidae; Erebia; Erebia medusa; Finland; Bold; LEFIF128-10; HQ570389  
 Lepidoptera; Lycaenidae; Phengaris; Maculinea alcon; Denmark; GenBank; -; HQ918119  
 Lepidoptera; Lycaenidae; Polyommatus; Polyommatus icarus; Turkey; GenBank; -; HQ989581  
 Lepidoptera; Nymphalidae; Fabriciana; Argynnis niobe; Finland; GenBank; -; JF853516  
 Lepidoptera; Nymphalidae; Fabriciana; Argynnis niobe; Finland; GenBank; -; JF853517  
 Lepidoptera; Lycaenidae; Lycaena; Lycaena dispar; Finland; GenBank; -; JF853545  
 Lepidoptera; Hesperidae; Hesperia; Hesperia comma; Finland; GenBank; -; JF853614  
 Lepidoptera; Hesperidae; Hesperia; Hesperia comma; Finland; GenBank; -; JF853615  
 Lepidoptera; Pieridae; Pieris; Pieris brassicae; Finland; GenBank; -; JF853625  
 Lepidoptera; Pieridae; Pontia; Pieris edusa; Finland; GenBank; -; JF853630

Lepidoptera;Lycaenidae;Celastrina;Celastrina argiolus;Finland;GenBank;-;JF853633  
 Lepidoptera;Lycaenidae;Plebejus;Plebejus argus;Finland;GenBank;-;JF853638  
 Lepidoptera;Lycaenidae;Cyathodonta;Cyathodonta semiargus;Finland;GenBank;-;JF853640  
 Lepidoptera;Lycaenidae;Thecla;Thecla betulae;Finland;GenBank;-;JF853643  
 Lepidoptera;Nymphalidae;Nymphalis;Nymphalis io;Finland;GenBank;-;JF853646  
 Lepidoptera;Nymphalidae;Apatura;Apatura ilia;Finland;GenBank;-;JF853652  
 Lepidoptera;Nymphalidae;Fabriciana;Argynnis adippe;Finland;GenBank;-;JF853656  
 Lepidoptera;Nymphalidae;Fabriciana;Argynnis niobe;Finland;GenBank;-;JF853657  
 Lepidoptera;Nymphalidae;Issoria;Issoria lathonia;Finland;GenBank;-;JF853658  
 Lepidoptera;Nymphalidae;Boloria;Boloria selene;Finland;GenBank;-;JF853661  
 Lepidoptera;Nymphalidae;Hipparchia;Hipparchia semele;Finland;GenBank;-;JF853667  
 Lepidoptera;Nymphalidae;Erebia;Erebia medusa;Finland;Bold;LEFIJ553-10;JF853668  
 Lepidoptera;Nymphalidae;Coenonympha;Coenonympha pamphilus;Finland;GenBank;-;JF853673  
 Lepidoptera;Nymphalidae;Pararge;Pararge aegeria;Finland;GenBank;-;JF853675  
 Lepidoptera;Nymphalidae;Pararge;Pararge aegeria;Finland;GenBank;-;JF853676  
 Lepidoptera;Papilionidae;Parnassius;Parnassius mnemosyne;Finland;GenBank;-;JF853828  
 Lepidoptera;Papilionidae;Parnassius;Parnassius mnemosyne;Finland;GenBank;-;JF853829  
 Lepidoptera;Nymphalidae;Hyponephele;Hyponephele lycaon;Russia;Bold;LEFIL234-10;JF854545  
 Lepidoptera;Lycaenidae;Phengaris;Maculinea arion;Estonia;GenBank;-;JF854554  
 Lepidoptera;Lycaenidae;Polyommatus;Polyommatus icarus;France;Bold;GBMIN32543-13;JN084701  
 Lepidoptera;Lycaenidae;Polyommatus;Polyommatus icarus;Italy;Bold;GBMIN32564-13;JN084706  
 Lepidoptera;Nymphalidae;Boloria;Boloria napaea;Finland;GenBank;-;JN272537  
 Lepidoptera;Nymphalidae;Pyrgus;Pyrgus alveus;Finland;GenBank;-;JN277847  
 Lepidoptera;Nymphalidae;Hipparchia;Hipparchia statilinus;Spain;GenBank;-;JN278890  
 Lepidoptera;Nymphalidae;Hipparchia;Hipparchia statilinus;Spain;GenBank;-;JN278891  
 Lepidoptera;Lycaenidae;Lycaena;Lycaena dispar;Austria;Bold;GWOSK784-11;JN280795  
 Lepidoptera;Lycaenidae;Lycaena;Lycaena dispar;Finland;GenBank;-;JN280797  
 Lepidoptera;Lycaenidae;Satyrium;Satyrium pruni;Russia;GenBank;-;JX112880  
 Lepidoptera;Lycaenidae;Satyrium;Satyrium spini;Russia;GenBank;-;JX112881  
 Lepidoptera;Lycaenidae;Satyrium;Satyrium w-album;Russia;GenBank;-;JX112882  
 Lepidoptera;Lycaenidae;Satyrium;Satyrium acaciae;Russia;GenBank;-;JX112886  
 Lepidoptera;Lycaenidae;Aricia;Aricia agestis;Spain;Bold;GBMIN16215-13;JX678063  
 Lepidoptera;Lycaenidae;Aricia;Aricia agestis;Greece;Bold;GBMIN16183-13;JX678127  
 Lepidoptera;Lycaenidae;Aricia;Aricia agestis;Slovenia;Bold;GBMIN16319-13;JX678132  
 Lepidoptera;Pieridae;Pieris;Pieris brassicae;Austria;GenBank;-;KC462795  
 Lepidoptera;Pieridae;Pontia;Pieris edusa;Austria;GenBank;-;KC462865  
 Lepidoptera;Pieridae;Pontia;Pieris edusa;Austria;GenBank;-;KC462866  
 Lepidoptera;Pieridae;Leptidea;Leptidea juvernica;Ireland;Bold;GBGLP241-13;KC865992  
 Lepidoptera;Pieridae;Leptidea;Leptidea sinapis;Hungary;Bold;GBGLP202-13;KC866031  
 Lepidoptera;Pieridae;Leptidea;Leptidea sinapis;Croatia;Bold;GBGLP187-13;KC866046  
 Lepidoptera;Pieridae;Leptidea;Leptidea sinapis;Italy;Bold;GBGLP182-13;KC866051  
 Lepidoptera;Pieridae;Leptidea;Leptidea sinapis;Croatia;Bold;GBGLP181-13;KC866052  
 Lepidoptera;Pieridae;Leptidea;Leptidea sinapis;Hungary;Bold;GBGLP134-13;KC866099  
 Lepidoptera;Pieridae;Leptidea;Leptidea sinapis;Ireland;Bold;GBGLP096-13;KC866137  
 Lepidoptera;Nymphalidae;Minois;Minois dryas;Russia;GenBank;-;KF723544  
 Lepidoptera;Nymphalidae;Fabriciana;Argynnis niobe;Russia;GenBank;-;KF723548  
 Lepidoptera;Nymphalidae;Brenthis;Brenthis ino;Russia;GenBank;-;KF723550  
 Lepidoptera;Lycaenidae;Lampides;Lampides boeticus;Russia;GenBank;-;KF860853  
 Lepidoptera;Nymphalidae;Melitaea;Melitaea trivia;Russia;GenBank;-;KJ638698  
 Lepidoptera;Nymphalidae;Maniola;Maniola jurtina;France;GenBank;-;KM020807  
 Lepidoptera;Nymphalidae;Maniola;Maniola jurtina;Italy;GenBank;-;KM020809  
 Lepidoptera;Nymphalidae;Maniola;Maniola jurtina;Italy;GenBank;-;KM020818  
 Lepidoptera;Nymphalidae;Maniola;Maniola jurtina;Italy;GenBank;-;KM020820  
 Lepidoptera;Nymphalidae;Maniola;Maniola jurtina;Italy;GenBank;-;KM020822  
 Lepidoptera;Nymphalidae;Maniola;Maniola jurtina;France;GenBank;-;KM020823  
 Lepidoptera;Nymphalidae;Maniola;Maniola jurtina;Italy;GenBank;-;KM020826  
 Lepidoptera;Nymphalidae;Maniola;Maniola jurtina;Malta;GenBank;-;KM020828  
 Lepidoptera;Nymphalidae;Maniola;Maniola jurtina;Malta;GenBank;-;KM020835  
 Lepidoptera;Nymphalidae;Maniola;Maniola jurtina;Italy;GenBank;-;KM020838  
 Lepidoptera;Nymphalidae;Maniola;Maniola jurtina;France;GenBank;-;KM020842  
 Lepidoptera;Nymphalidae;Maniola;Maniola jurtina;Italy;GenBank;-;KM020843  
 Lepidoptera;Nymphalidae;Maniola;Maniola jurtina;Italy;GenBank;-;KM020844  
 Lepidoptera;Nymphalidae;Maniola;Maniola jurtina;Italy;GenBank;-;KM020846  
 Lepidoptera;Nymphalidae;Maniola;Maniola jurtina;Italy;GenBank;-;KM020851  
 Lepidoptera;Nymphalidae;Maniola;Maniola jurtina;Italy;GenBank;-;KM020852  
 Lepidoptera;Nymphalidae;Maniola;Maniola jurtina;Italy;GenBank;-;KM020861  
 Lepidoptera;Nymphalidae;Maniola;Maniola jurtina;Italy;GenBank;-;KM020868  
 Lepidoptera;Nymphalidae;Maniola;Maniola jurtina;Italy;GenBank;-;KM020870  
 Lepidoptera;Nymphalidae;Maniola;Maniola jurtina;Italy;GenBank;-;KM020875  
 Lepidoptera;Nymphalidae;Maniola;Maniola jurtina;Malta;GenBank;-;KM020877  
 Lepidoptera;Nymphalidae;Maniola;Maniola jurtina;Malta;GenBank;-;KM020879  
 Lepidoptera;Nymphalidae;Maniola;Maniola jurtina;Italy;GenBank;-;KM020880  
 Lepidoptera;Nymphalidae;Maniola;Maniola jurtina;Italy;GenBank;-;KM020882  
 Lepidoptera;Nymphalidae;Maniola;Maniola jurtina;France;Bold;GBLN5018-14;KM033851  
 Lepidoptera;Nymphalidae;Maniola;Maniola jurtina;Italy;Bold;GBLN5065-14;KM033898  
 Lepidoptera;Nymphalidae;Maniola;Maniola jurtina;Italy;Bold;GBLN5066-14;KM033899  
 Lepidoptera;Nymphalidae;Maniola;Maniola jurtina;Italy;Bold;GBLN5072-14;KM033905  
 Lepidoptera;Nymphalidae;Maniola;Maniola jurtina;Italy;Bold;GBLN5073-14;KM033906

Lepidoptera;Nymphalidae;Maniola;Maniola jurtina;Italy;Bold;GBLN5076-14;KM033909  
 Lepidoptera;Nymphalidae;Maniola;Maniola jurtina;Italy;Bold;GBLN5077-14;KM033910  
 Lepidoptera;Nymphalidae;Maniola;Maniola jurtina;Italy;Bold;GBLN5078-14;KM033911  
 Lepidoptera;Nymphalidae;Maniola;Maniola jurtina;France;Bold;GBLN5087-14;KM033920  
 Lepidoptera;Nymphalidae;Maniola;Maniola jurtina;France;Bold;GBLN5088-14;KM033921  
 Lepidoptera;Nymphalidae;Maniola;Maniola jurtina;Italy;Bold;GBLN5103-14;KM033936  
 Lepidoptera;Nymphalidae;Maniola;Maniola jurtina;Italy;Bold;GBLN5104-14;KM033937  
 Lepidoptera;Nymphalidae;Maniola;Maniola jurtina;Italy;Bold;GBLN5105-14;KM033938  
 Lepidoptera;Nymphalidae;Maniola;Maniola jurtina;Italy;Bold;GBLN5106-14;KM033939  
 Lepidoptera;Lycaenidae;Aricia;Aricia agestis;Spain;Bold;GBGL18167-15;KM459029  
 Lepidoptera;Lycaenidae;Aricia;Aricia agestis;France;Bold;GBGL18190-15;KM459052  
 Lepidoptera;Lycaenidae;Aricia;Aricia agestis;France;Bold;GBGL18191-15;KM459053  
 Lepidoptera;Lycaenidae;Aricia;Aricia agestis;Italy;Bold;GBGL18199-15;KM459061  
 Lepidoptera;Lycaenidae;Aricia;Aricia agestis;Italy;Bold;GBGL18200-15;KM459062  
 Lepidoptera;Lycaenidae;Aricia;Aricia agestis;Italy;Bold;GBGL18201-15;KM459063  
 Lepidoptera;Lycaenidae;Aricia;Aricia agestis;Italy;Bold;GBGL18202-15;KM459064  
 Lepidoptera;Lycaenidae;Aricia;Aricia agestis;Italy;Bold;GBGL18203-15;KM459065  
 Lepidoptera;Lycaenidae;Aricia;Aricia agestis;Italy;Bold;GBGL18207-15;KM459069  
 Lepidoptera;Lycaenidae;Aricia;Aricia agestis;Italy;Bold;GBGL18208-15;KM459070  
 Lepidoptera;Lycaenidae;Aricia;Aricia agestis;Italy;Bold;GBGL18209-15;KM459071  
 Lepidoptera;Lycaenidae;Aricia;Aricia agestis;Italy;Bold;GBGL18210-15;KM459072  
 Lepidoptera;Lycaenidae;Aricia;Aricia agestis;Italy;Bold;GBGL18211-15;KM459073  
 Lepidoptera;Lycaenidae;Aricia;Aricia agestis;France;Bold;GBGL18222-15;KM459084  
 Lepidoptera;Lycaenidae;Aricia;Aricia agestis;Italy;Bold;GBGL18238-15;KM459100  
 Lepidoptera;Lycaenidae;Aricia;Aricia cramera;Italy;Bold;GBGL18265-15;KM459127  
 Lepidoptera;Lycaenidae;Aricia;Aricia cramera;Italy;Bold;GBGL18266-15;KM459128  
 Lepidoptera;Lycaenidae;Aricia;Aricia cramera;Italy;Bold;GBGL18273-15;KM459135  
 Lepidoptera;Lycaenidae;Polyommatus;Polyommatus icarus;Spain;Bold;GBGL19935-15;KM459184  
 Lepidoptera;Lycaenidae;Polyommatus;Polyommatus icarus;Spain;Bold;GBGL19937-15;KM459186  
 Lepidoptera;Lycaenidae;Polyommatus;Polyommatus icarus;Italy;Bold;GBGL19963-15;KM459214  
 Lepidoptera;Lycaenidae;Polyommatus;Polyommatus icarus;Italy;Bold;GBGL19964-15;KM459215  
 Lepidoptera;Lycaenidae;Polyommatus;Polyommatus icarus;Italy;Bold;GBGL19965-15;KM459216  
 Lepidoptera;Lycaenidae;Polyommatus;Polyommatus icarus;Malta;Bold;GBGL19976-15;KM459234  
 Lepidoptera;Lycaenidae;Polyommatus;Polyommatus icarus;Malta;Bold;GBGL19977-15;KM459235  
 Lepidoptera;Lycaenidae;Polyommatus;Polyommatus icarus;Malta;Bold;GBGL19978-15;KM459236  
 Lepidoptera;Lycaenidae;Polyommatus;Polyommatus icarus;Malta;Bold;GBGL19979-15;KM459237  
 Lepidoptera;Lycaenidae;Polyommatus;Polyommatus icarus;Malta;Bold;GBGL19980-15;KM459238  
 Lepidoptera;Lycaenidae;Polyommatus;Polyommatus icarus;Malta;Bold;GBGL19981-15;KM459239  
 Lepidoptera;Lycaenidae;Polyommatus;Polyommatus icarus;Italy;Bold;GBGL19987-15;KM459245  
 Lepidoptera;Lycaenidae;Polyommatus;Polyommatus icarus;Italy;Bold;GBGL20010-15;KM459268  
 Lepidoptera;Lycaenidae;Polyommatus;Polyommatus icarus;Italy;Bold;GBGL20011-15;KM459269  
 Lepidoptera;Lycaenidae;Polyommatus;Polyommatus icarus;Italy;Bold;GBGL20012-15;KM459270  
 Lepidoptera;Lycaenidae;Polyommatus;Polyommatus icarus;Italy;Bold;GBGL20013-15;KM459271  
 Lepidoptera;Lycaenidae;Polyommatus;Polyommatus icarus;Italy;Bold;GBGL20014-15;KM459272  
 Lepidoptera;Lycaenidae;Polyommatus;Polyommatus icarus;Italy;Bold;GBGL20015-15;KM459273  
 Lepidoptera;Lycaenidae;Polyommatus;Polyommatus icarus;Italy;Bold;GBGL20016-15;KM459274  
 Lepidoptera;Lycaenidae;Polyommatus;Polyommatus icarus;Italy;Bold;GBGL20017-15;KM459275  
 Lepidoptera;Lycaenidae;Polyommatus;Polyommatus icarus;Italy;Bold;GBGL20018-15;KM459276  
 Lepidoptera;Lycaenidae;Polyommatus;Polyommatus icarus;Italy;Bold;GBGL20019-15;KM459277  
 Lepidoptera;Lycaenidae;Polyommatus;Polyommatus icarus;Italy;Bold;GBGL20020-15;KM459278  
 Lepidoptera;Lycaenidae;Polyommatus;Polyommatus icarus;Italy;Bold;GBGL20021-15;KM459279  
 Lepidoptera;Lycaenidae;Polyommatus;Polyommatus icarus;Italy;Bold;GBGL20022-15;KM459280  
 Lepidoptera;Lycaenidae;Polyommatus;Polyommatus icarus;Italy;Bold;GBGL20023-15;KM459281  
 Lepidoptera;Lycaenidae;Polyommatus;Polyommatus icarus;Italy;Bold;GBGL20040-15;KM459303  
 Lepidoptera;Lycaenidae;Polyommatus;Polyommatus icarus;Italy;Bold;GBGL20041-15;KM459304  
 Lepidoptera;Lycaenidae;Polyommatus;Polyommatus icarus;Italy;Bold;GBGL20052-15;KM459315  
 Lepidoptera;Lycaenidae;Polyommatus;Polyommatus icarus;Italy;Bold;GBGL20053-15;KM459316  
 Lepidoptera;Lycaenidae;Polyommatus;Polyommatus icarus;Italy;Bold;GBGL20058-15;KM459321  
 Lepidoptera;Lycaenidae;Polyommatus;Polyommatus icarus;Italy;Bold;GBGL20059-15;KM459322  
 Lepidoptera;Lycaenidae;Polyommatus;Polyommatus icarus;Italy;Bold;EULEP095-14;KM459357  
 Lepidoptera;Lycaenidae;Polyommatus;Polyommatus icarus;Italy;Bold;GBGL20092-15;KM459375  
 Lepidoptera;Lycaenidae;Polyommatus;Polyommatus icarus;France;Bold;GBGL20104-15;KM459388  
 Lepidoptera;Lycaenidae;Polyommatus;Polyommatus icarus;France;Bold;GBGL20105-15;KM459389  
 Lepidoptera;Lycaenidae;Polyommatus;Polyommatus icarus;Italy;Bold;GBGL20117-15;KM459401  
 Lepidoptera;Lycaenidae;Polyommatus;Polyommatus icarus;Italy;Bold;GBGL20118-15;KM459402  
 Lepidoptera;Lycaenidae;Polyommatus;Polyommatus icarus;Italy;Bold;GBGL20119-15;KM459403  
 Lepidoptera;Lycaenidae;Polyommatus;Polyommatus icarus;Italy;Bold;GBGL20120-15;KM459404  
 Lepidoptera;Lycaenidae;Polyommatus;Polyommatus icarus;Italy;Bold;GBGL20121-15;KM459405  
 Lepidoptera;Lycaenidae;Polyommatus;Polyommatus icarus;Italy;Bold;GBGL20129-15;KM459415  
 Lepidoptera;Lycaenidae;Polyommatus;Polyommatus icarus;Italy;Bold;GBGL20130-15;KM459416  
 Lepidoptera;Lycaenidae;Polyommatus;Polyommatus icarus;Italy;Bold;GBGL20137-15;KM459423  
 Lepidoptera;Lycaenidae;Polyommatus;Polyommatus icarus;France;Bold;GBGL20140-15;KM459426  
 Lepidoptera;Lycaenidae;Polyommatus;Polyommatus icarus;France;Bold;GBGL20142-15;KM459428  
 Lepidoptera;Lycaenidae;Polyommatus;Polyommatus icarus;Italy;Bold;GBGL20152-15;KM459439  
 Lepidoptera;Lycaenidae;Aricia;Aricia agestis;Italy;GenBank;-;KM517842  
 Lepidoptera;Lycaenidae;Polyommatus;Polyommatus icarus;Finland;GenBank;-;KM572032  
 Lepidoptera;Lycaenidae;Cyraniris;Cyraniris semiargus;Finland;GenBank;-;KM573316  
 Lepidoptera;Nymphalidae;Boloria;Boloria selene;Finland;GenBank;-;KM573567



Lepidoptera;Lycaenidae;Lysandra;Polyommatus coridon;Austria;GenBank;-;KM972617  
 Lepidoptera;Lycaenidae;Aricia;Aricia agestis;Italy;Bold;GBGL18243-15;KP052710  
 Lepidoptera;Pieridae;Pieris;Pieris rapae;Spain;GenBank;-;KP870276  
 Lepidoptera;Lycaenidae;Phengaris;Maculinea alcon;Spain;GenBank;-;KP870289  
 Lepidoptera;Nymphalidae;Vanessa;Vanessa atalanta;Spain;GenBank;-;KP870311  
 Lepidoptera;Nymphalidae;Minois;Minois dryas;Spain;GenBank;-;KP870317  
 Lepidoptera;Nymphalidae;Minois;Minois dryas;Spain;GenBank;-;KP870368  
 Lepidoptera;Pieridae;Pieris;Pieris brassicae;Portugal;GenBank;-;KP870372  
 Lepidoptera;Nymphalidae;Arethusana;Arethusana arethusana;Spain;GenBank;-;KP870380  
 Lepidoptera;Nymphalidae;Nymphalis;Nymphalis antiopa;Spain;GenBank;-;KP870403  
 Lepidoptera;Nymphalidae;Erebia;Erebia manto;Spain;GenBank;-;KP870407  
 Lepidoptera;Nymphalidae;Minois;Minois dryas;Spain;GenBank;-;KP870420  
 Lepidoptera;Lycaenidae;Thecla;Thecla betulae;Spain;GenBank;-;KP870422  
 Lepidoptera;Lycaenidae;Phengaris;Maculinea alcon;Spain;GenBank;-;KP870427  
 Lepidoptera;Nymphalidae;Vanessa;Vanessa cardui;Spain;GenBank;-;KP870469  
 Lepidoptera;Lycaenidae;Phengaris;Maculinea alcon;Spain;GenBank;-;KP870487  
 Lepidoptera;Nymphalidae;Lasiommata;Lasiommata megera;Spain;GenBank;-;KP870492  
 Lepidoptera;Lycaenidae;Phengaris;Maculinea alcon;Spain;GenBank;-;KP870501  
 Lepidoptera;Lycaenidae;Thecla;Thecla betulae;Spain;GenBank;-;KP870561  
 Lepidoptera;Pieridae;Pieris;Pieris brassicae;Portugal;GenBank;-;KP870572  
 Lepidoptera;Nymphalidae;Hipparchia;Hipparchia semele;Sweden;GenBank;-;KP870578  
 Lepidoptera;Nymphalidae;Erebia;Erebia manto;Spain;GenBank;-;KP870586  
 Lepidoptera;Nymphalidae;Hipparchia;Hipparchia semele;Sweden;GenBank;-;KP870629  
 Lepidoptera;Lycaenidae;Phengaris;Maculinea alcon;Spain;GenBank;-;KP870639  
 Lepidoptera;Nymphalidae;Nymphalis;Nymphalis antiopa;Spain;GenBank;-;KP870651  
 Lepidoptera;Nymphalidae;Minois;Minois dryas;Spain;GenBank;-;KP870743  
 Lepidoptera;Nymphalidae;Nymphalis;Nymphalis antiopa;Spain;GenBank;-;KP870835  
 Lepidoptera;Nymphalidae;Nymphalis;Nymphalis io;Spain;GenBank;-;KP870896  
 Lepidoptera;Lycaenidae;Phengaris;Maculinea alcon;Spain;GenBank;-;KP870946  
 Lepidoptera;Nymphalidae;Vanessa;Vanessa cardui;Spain;GenBank;-;KP870949  
 Lepidoptera;Lycaenidae;Phengaris;Maculinea alcon;Spain;GenBank;-;KP870963  
 Lepidoptera;Nymphalidae;Minois;Minois dryas;Spain;GenBank;-;KP870992  
 Lepidoptera;Nymphalidae;Minois;Minois dryas;Spain;GenBank;-;KP870995  
 Lepidoptera;Nymphalidae;Minois;Minois dryas;Spain;GenBank;-;KP871008  
 Lepidoptera;Nymphalidae;Vanessa;Vanessa cardui;Spain;GenBank;-;KP871009  
 Lepidoptera;Nymphalidae;Vanessa;Vanessa cardui;Spain;GenBank;-;KP871040  
 Lepidoptera;Hesperiidae;Carcharodus;Carcharodus alceae;Spain;GenBank;-;KP871152  
 Lepidoptera;Lycaenidae;Phengaris;Maculinea arion;Latvia;GenBank;-;KT782549  
 Lepidoptera;Nymphalidae;Melitaea;Melitaea phoebe;Austria;GenBank;-;KT907186  
 Lepidoptera;Hesperiidae;Spialia;Spialia sertorius;Italy;GenBank;-;KU905343  
 Lepidoptera;Hesperiidae;Spialia;Spialia sertorius;France;GenBank;-;KU905484  
 Lepidoptera;Nymphalidae;Nymphalis;Nymphalis polychloros;Finland;GenBank;-;KX041438  
 Lepidoptera;Lycaenidae;Lycaena;Lycaena hippothoe;Croatia;GenBank;-;KX044480  
 Lepidoptera;Nymphalidae;Lasiommata;Lasiommata megera;Norway;GenBank;-;KX047683  
 Lepidoptera;Pieridae;Gonepteryx;Gonepteryx rhamni;Norway;GenBank;-;KX047756  
 Lepidoptera;Lycaenidae;Lycaena;Lycaena phlaeas;Norway;GenBank;-;KX047828  
 Lepidoptera;Hesperiidae;Hesperia;Hesperia comma;Norway;GenBank;-;KX047906  
 Lepidoptera;Lycaenidae;Scolitantides;Scolitantides orion;Norway;GenBank;-;KX048470  
 Lepidoptera;Lycaenidae;Cupido;Cupido minimus;Norway;GenBank;-;KX048709  
 Lepidoptera;Lycaenidae;Scolitantides;Scolitantides orion;Norway;GenBank;-;KX048958  
 Lepidoptera;Lycaenidae;Polyommatus;Polyommatus icarus;Norway;GenBank;-;KX049307  
 Lepidoptera;Nymphalidae;Erebia;Erebia medusa;Norway;Bold;LON171-08;KX049579  
 Lepidoptera;Lycaenidae;Lycaena;Lycaena phlaeas;Norway;GenBank;-;KX049723  
 Lepidoptera;Nymphalidae;Coenonympha;Coenonympha pamphilus;Norway;GenBank;-;KX049735  
 Lepidoptera;Nymphalidae;Hyponephele;Hyponephele lycaon;Russia;Bold;LEFIL235-10;KX049854  
 Lepidoptera;Nymphalidae;Vanessa;Vanessa atalanta;Norway;GenBank;-;KX049889  
 Lepidoptera;Lycaenidae;Thecla;Thecla betulae;Norway;GenBank;-;KX049957  
 Lepidoptera;Lycaenidae;Aricia;Aricia allous;Norway;GenBank;-;KX050013  
 Lepidoptera;Nymphalidae;Satyrus;Satyrus ferula;Russia;GenBank;-;KY000505  
 Lepidoptera;Nymphalidae;Satyrus;Satyrus ferula;Russia;GenBank;-;KY000510  
 Lepidoptera;Nymphalidae;Erebia;Erebia ligea;Russia;GenBank;-;LC229018  
 Lepidoptera;Nymphalidae;Erebia;Erebia euryale;Russia;GenBank;-;LC340478  
 Lepidoptera;Nymphalidae;Erebia;Erebia scipio;Italy;GenBank;-;LC340559  
 Lepidoptera;Nymphalidae;Erebia;Erebia medusa;Norway;GenBank;-;LC340564  
 Lepidoptera;Lycaenidae;Agriades;Albulina optilete;Denmark;GenBank;-;LT219473  
 Lepidoptera;Lycaenidae;Agriades;Albulina optilete;Denmark;GenBank;-;LT219474  
 Lepidoptera;Lycaenidae;Agriades;Albulina optilete;Denmark;GenBank;-;LT219475  
 Lepidoptera;Lycaenidae;Agriades;Albulina optilete;Denmark;GenBank;-;LT219477  
 Lepidoptera;Lycaenidae;Agriades;Albulina optilete;Denmark;GenBank;-;LT219478  
 Lepidoptera;Lycaenidae;Agriades;Albulina optilete;Denmark;GenBank;-;LT219479  
 Lepidoptera;Lycaenidae;Agriades;Albulina optilete;Denmark;GenBank;-;LT219480  
 Lepidoptera;Lycaenidae;Agriades;Albulina optilete;Denmark;GenBank;-;LT219481  
 Lepidoptera;Lycaenidae;Plebejus;Plebejus argus;Denmark;GenBank;-;LT219906  
 Lepidoptera;Lycaenidae;Plebejus;Plebejus argus;Denmark;GenBank;-;LT219907  
 Lepidoptera;Lycaenidae;Plebejus;Plebejus argus;Denmark;GenBank;-;LT219908  
 Lepidoptera;Lycaenidae;Plebejus;Plebejus argus;Denmark;GenBank;-;LT219909  
 Lepidoptera;Lycaenidae;Plebejus;Plebejus argus;Denmark;GenBank;-;LT219910  
 Lepidoptera;Lycaenidae;Plebejus;Plebejus argus;Denmark;GenBank;-;LT219911

Lepidoptera;Lycaenidae;Plebejus;Plebejus argus;Denmark;GenBank;-;LT219912  
 Lepidoptera;Nymphalidae;Melanargia;Melanargia russiae;Russia;GenBank;-;MG817334  
 Lepidoptera;Nymphalidae;Pararge;Pararge aegeria;Italy;GenBank;-;MH089591  
 Lepidoptera;Nymphalidae;Pararge;Pararge aegeria;Italy;GenBank;-;MH089592  
 Lepidoptera;Nymphalidae;Pararge;Pararge aegeria;France;GenBank;-;MH089593  
 Lepidoptera;Nymphalidae;Pararge;Pararge aegeria;France;GenBank;-;MH089599  
 Lepidoptera;Nymphalidae;Pararge;Pararge aegeria;Italy;GenBank;-;MH089604  
 Lepidoptera;Nymphalidae;Pararge;Pararge aegeria;Italy;GenBank;-;MH089605  
 Lepidoptera;Nymphalidae;Pararge;Pararge aegeria;Malta;GenBank;-;MH089610  
 Lepidoptera;Nymphalidae;Pararge;Pararge aegeria;Italy;GenBank;-;MH089612  
 Lepidoptera;Nymphalidae;Pararge;Pararge aegeria;Italy;GenBank;-;MH089627  
 Lepidoptera;Nymphalidae;Pararge;Pararge aegeria;Italy;GenBank;-;MH089630  
 Lepidoptera;Nymphalidae;Pararge;Pararge aegeria;Italy;GenBank;-;MH089640  
 Lepidoptera;Nymphalidae;Pararge;Pararge aegeria;Italy;GenBank;-;MH089643  
 Lepidoptera;Nymphalidae;Pararge;Pararge aegeria;Italy;GenBank;-;MH089654  
 Lepidoptera;Nymphalidae;Pararge;Pararge aegeria;Italy;GenBank;-;MH089657  
 Lepidoptera;Nymphalidae;Pararge;Pararge aegeria;Italy;GenBank;-;MH089659  
 Lepidoptera;Nymphalidae;Pararge;Pararge aegeria;Italy;GenBank;-;MH089664  
 Lepidoptera;Nymphalidae;Pararge;Pararge aegeria;Italy;GenBank;-;MH089668  
 Lepidoptera;Nymphalidae;Pararge;Pararge aegeria;Italy;GenBank;-;MH089672  
 Lepidoptera;Nymphalidae;Pararge;Pararge aegeria;Malta;GenBank;-;MH089674  
 Lepidoptera;Nymphalidae;Pararge;Pararge aegeria;Italy;GenBank;-;MH089675  
 Lepidoptera;Nymphalidae;Pararge;Pararge aegeria;Italy;GenBank;-;MH089678  
 Lepidoptera;Nymphalidae;Pararge;Pararge aegeria;Italy;GenBank;-;MH089689  
 Lepidoptera;Nymphalidae;Pararge;Pararge aegeria;Italy;GenBank;-;MH089691  
 Lepidoptera;Nymphalidae;Pararge;Pararge aegeria;Italy;GenBank;-;MH089693  
 Lepidoptera;Nymphalidae;Pararge;Pararge aegeria;Italy;GenBank;-;MH089696  
 Lepidoptera;Nymphalidae;Pararge;Pararge aegeria;Italy;GenBank;-;MH089697  
 Lepidoptera;Nymphalidae;Pararge;Pararge aegeria;Italy;GenBank;-;MH089702  
 Lepidoptera;Nymphalidae;Pararge;Pararge aegeria;Italy;GenBank;-;MH089706  
 Lepidoptera;Nymphalidae;Pararge;Pararge aegeria;France;GenBank;-;MH089710  
 Lepidoptera;Nymphalidae;Pararge;Pararge aegeria;Italy;GenBank;-;MH089716  
 Lepidoptera;Nymphalidae;Pararge;Pararge aegeria;Italy;GenBank;-;MH089723  
 Lepidoptera;Nymphalidae;Pararge;Pararge aegeria;United Kingdom;GenBank;-;MH089732  
 Lepidoptera;Nymphalidae;Pararge;Pararge aegeria;Italy;GenBank;-;MH089738  
 Lepidoptera;Nymphalidae;Pararge;Pararge aegeria;France;GenBank;-;MH089751  
 Lepidoptera;Nymphalidae;Pararge;Pararge aegeria;Spain;GenBank;-;MH089753  
 Lepidoptera;Nymphalidae;Pararge;Pararge aegeria;Spain;GenBank;-;MH089760  
 Lepidoptera;Nymphalidae;Pararge;Pararge aegeria;Italy;GenBank;-;MH089761  
 Lepidoptera;Nymphalidae;Pararge;Pararge aegeria;Italy;GenBank;-;MH089771  
 Lepidoptera;Nymphalidae;Pararge;Pararge aegeria;Italy;GenBank;-;MH089775  
 Lepidoptera;Nymphalidae;Pararge;Pararge aegeria;Italy;GenBank;-;MH089778  
 Lepidoptera;Nymphalidae;Pararge;Pararge aegeria;Italy;GenBank;-;MH089779  
 Lepidoptera;Nymphalidae;Pararge;Pararge aegeria;France;GenBank;-;MH089781  
 Lepidoptera;Nymphalidae;Pararge;Pararge aegeria;Malta;GenBank;-;MH089784  
 Lepidoptera;Nymphalidae;Pararge;Pararge aegeria;Italy;GenBank;-;MH089793  
 Lepidoptera;Nymphalidae;Pararge;Pararge aegeria;Italy;GenBank;-;MH089798  
 Lepidoptera;Nymphalidae;Pararge;Pararge aegeria;Malta;GenBank;-;MH089799  
 Lepidoptera;Nymphalidae;Pararge;Pararge aegeria;Italy;GenBank;-;MH089802  
 Lepidoptera;Nymphalidae;Pararge;Pararge aegeria;Italy;GenBank;-;MH089810  
 Lepidoptera;Nymphalidae;Pararge;Pararge aegeria;Italy;GenBank;-;MH089813  
 Lepidoptera;Nymphalidae;Pararge;Pararge aegeria;Italy;GenBank;-;MH089814  
 Lepidoptera;Nymphalidae;Pararge;Pararge aegeria;Italy;GenBank;-;MH089815  
 Lepidoptera;Nymphalidae;Pararge;Pararge aegeria;Italy;GenBank;-;MH089817  
 Lepidoptera;Nymphalidae;Pararge;Pararge aegeria;Italy;GenBank;-;MH089831  
 Lepidoptera;Nymphalidae;Pararge;Pararge aegeria;Italy;GenBank;-;MH089835  
 Lepidoptera;Nymphalidae;Pararge;Pararge aegeria;Italy;GenBank;-;MH089836  
 Lepidoptera;Nymphalidae;Pararge;Pararge aegeria;Italy;GenBank;-;MH089837  
 Lepidoptera;Nymphalidae;Melanargia;Melanargia galathea;France;GenBank;-;MH308277  
 Lepidoptera;Nymphalidae;Melanargia;Melanargia galathea;Italy;GenBank;-;MH308286  
 Lepidoptera;Nymphalidae;Melanargia;Melanargia galathea;Italy;GenBank;-;MH308327  
 Lepidoptera;Lycaenidae;Leptotes;Leptotes pirithous;Italy;GenBank;-;MH418493  
 Lepidoptera;Nymphalidae;Lasiommata;Lasiommata paramegaera;Italy;GenBank;-;MH418496  
 Lepidoptera;Pieridae;Pontia;Pieris edusa;Italy;GenBank;-;MH418498  
 Lepidoptera;Lycaenidae;Callophrys;Callophrys rubi;Italy;GenBank;-;MH418507  
 Lepidoptera;Pieridae;Pieris;Pieris rapae;Italy;GenBank;-;MH418515  
 Lepidoptera;Hesperiidae;Gegenes;Gegenes pumilio;Italy;GenBank;-;MH418516  
 Lepidoptera;Pieridae;Pontia;Pieris edusa;Italy;GenBank;-;MH418519  
 Lepidoptera;Nymphalidae;Lasiommata;Lasiommata megera;Italy;GenBank;-;MH418524  
 Lepidoptera;Nymphalidae;Charaxes;Charaxes jasius;Italy;GenBank;-;MH418528  
 Lepidoptera;Papilionidae;Papilio;Papilio machaon;Italy;GenBank;-;MH418538  
 Lepidoptera;Lycaenidae;Lampides;Lampides boeticus;Italy;GenBank;-;MH418541  
 Lepidoptera;Pieridae;Gonepteryx;Gonepteryx cleopatra;Italy;GenBank;-;MH418547  
 Lepidoptera;Nymphalidae;Vanessa;Vanessa atalanta;Italy;GenBank;-;MH418554  
 Lepidoptera;Nymphalidae;Pyronia;Pyronia cecilia;Italy;Bold;WMB1948-13;MH418557  
 Lepidoptera;Hesperiidae;Carcharodus;Carcharodus alceae;France;GenBank;-;MH418558  
 Lepidoptera;Lycaenidae;Lampides;Lampides boeticus;France;GenBank;-;MH418561  
 Lepidoptera;Nymphalidae;Hipparchia;Hipparchia aristaeus;Italy;GenBank;-;MH418562

Lepidoptera;Nymphalidae;Lasiommata;Lasiommata megera;Italy;GenBank;-;MH418563  
 Lepidoptera ;Lycaenidae;Leptotes;Leptotes pirithous;Italy;GenBank;-;MH418565  
 Lepidoptera;Nymphalidae;Melitaea;Melitaea cinxia;Italy;GenBank;-;MH418573  
 Lepidoptera;Pieridae;Pieris;Pieris rapae;Italy;GenBank;-;MH418576  
 Lepidoptera;Lycaenidae;Lycaena;Lycaena phlaeas;Italy;GenBank;-;MH418583  
 Lepidoptera;Nymphalidae;Vanessa;Vanessa atalanta;Italy;GenBank;-;MH418592  
 Lepidoptera;Nymphalidae;Lasiommata;Lasiommata megera;Italy;GenBank;-;MH418594  
 Lepidoptera;Papilionidae;Papilio;Papilio machaon;Italy;GenBank;-;MH418596  
 Lepidoptera;Nymphalidae;Lasiommata;Lasiommata megera;Malta;GenBank;-;MH418597  
 Lepidoptera;Nymphalidae;Lasiommata;Lasiommata paramegaera;Italy;GenBank;-;MH418604  
 Lepidoptera;Nymphalidae;Lasiommata;Lasiommata paramegaera;Italy;GenBank;-;MH418606  
 Lepidoptera;Lycaenidae;Celastrina;Celastrina argiolus;Italy;GenBank;-;MH418621  
 Lepidoptera;Pieridae;Pontia;Pieris edusa;Italy;GenBank;-;MH418623  
 Lepidoptera;Papilionidae;Papilio;Papilio machaon;Italy;GenBank;-;MH418625  
 Lepidoptera;Papilionidae;Papilio;Papilio machaon;Italy;GenBank;-;MH418642  
 Lepidoptera;Pieridae;Pontia;Pieris edusa;Italy;GenBank;-;MH418645  
 Lepidoptera;Pieridae;Pieris;Pieris brassicae;Italy;GenBank;-;MH418653  
 Lepidoptera;Papilionidae;Papilio;Papilio machaon;Italy;GenBank;-;MH418659  
 Lepidoptera ;Pieridae;Gonepteryx;Gonepteryx cleopatra;Italy;GenBank;-;MH418662  
 Lepidoptera;Nymphalidae;Pyronia;Pyronia cecilia;France;Bold;WMB1526-13;MH418665  
 Lepidoptera;Lycaenidae;Celastrina;Celastrina argiolus;Italy;GenBank;-;MH418670  
 Lepidoptera;Nymphalidae;Pyronia;Pyronia tithonus;Italy;Bold;WMB063-11;MH418671  
 Lepidoptera;Nymphalidae;Charaxes;Charaxes jasius;Italy;GenBank;-;MH418675  
 Lepidoptera;Pieridae;Pieris;Pieris rapae;Italy;GenBank;-;MH418677  
 Lepidoptera;Nymphalidae;Vanessa;Vanessa cardui;Italy;GenBank;-;MH418681  
 Lepidoptera;Lycaenidae;Celastrina;Celastrina argiolus;Malta;GenBank;-;MH418684  
 Lepidoptera ;Lycaenidae;Lampides;Lampides boeticus;Malta;GenBank;-;MH418688  
 Lepidoptera;Nymphalidae;Vanessa;Vanessa atalanta;Malta;GenBank;-;MH418690  
 Lepidoptera;Lycaenidae;Lycaena;Lycaena phlaeas;Italy;GenBank;-;MH418696  
 Lepidoptera;Nymphalidae;Lasiommata;Lasiommata megera;Italy;GenBank;-;MH418697  
 Lepidoptera;Nymphalidae;Limenitis;Limenitis reducta;Italy;GenBank;-;MH418707  
 Lepidoptera ;Lycaenidae;Leptotes;Leptotes pirithous;Italy;GenBank;-;MH418711  
 Lepidoptera;Pieridae;Pieris;Pieris manni;Italy;GenBank;-;MH418720  
 Lepidoptera;Papilionidae;Papilio;Papilio machaon;Italy;GenBank;-;MH418722  
 Lepidoptera;Pieridae;Pieris;Pieris brassicae;Italy;GenBank;-;MH418728  
 Lepidoptera;Pieridae;Pieris;Pieris rapae;Italy;GenBank;-;MH418731  
 Lepidoptera;Pieridae;Euchloe;Euchloe ausonia;Italy;GenBank;-;MH418741  
 Lepidoptera;Nymphalidae;Limenitis;Limenitis reducta;France;GenBank;-;MH418744  
 Lepidoptera;Pieridae;Pieris;Pieris rapae;Italy;GenBank;-;MH418751  
 Lepidoptera ;Lycaenidae;Lampides;Lampides boeticus;Italy;GenBank;-;MH418753  
 Lepidoptera;Nymphalidae;Pyronia;Pyronia cecilia;Italy;Bold;WMB1984-13;MH418758  
 Lepidoptera;Nymphalidae;Lasiommata;Lasiommata megera;Malta;GenBank;-;MH418759  
 Lepidoptera;Lycaenidae;Celastrina;Celastrina argiolus;Italy;GenBank;-;MH418762  
 Lepidoptera ;Lycaenidae;Leptotes;Leptotes pirithous;Italy;GenBank;-;MH418765  
 Lepidoptera;Lycaenidae;Lycaena;Lycaena phlaeas;Italy;GenBank;-;MH418768  
 Lepidoptera;Nymphalidae;Pyronia;Pyronia cecilia;Italy;Bold;WMB1808-13;MH418771  
 Lepidoptera;Nymphalidae;Coenonympha;Coenonympha corinna;France;GenBank;-;MH418782  
 Lepidoptera;Pieridae;Pieris;Pieris brassicae;Italy;GenBank;-;MH418791  
 Lepidoptera;Nymphalidae;Lasiommata;Lasiommata megera;Italy;GenBank;-;MH418792  
 Lepidoptera;Nymphalidae;Lasiommata;Lasiommata megera;Italy;GenBank;-;MH418797  
 Lepidoptera ;Lycaenidae;Lampides;Lampides boeticus;Malta;GenBank;-;MH418805  
 Lepidoptera;Lycaenidae;Glaucopsyche;Glaucopsyche alexis;France;GenBank;-;MH418811  
 Lepidoptera;Nymphalidae;Lasiommata;Lasiommata megera;Italy;GenBank;-;MH418813  
 Lepidoptera ;Hesperiidae;Gegenes;Gegenes pumilio;Italy;GenBank;-;MH418819  
 Lepidoptera;Pieridae;Pieris;Pieris rapae;Italy;GenBank;-;MH418828  
 Lepidoptera;Pieridae;Pontia;Pieris edusa;Italy;GenBank;-;MH418838  
 Lepidoptera;Nymphalidae;Lasiommata;Lasiommata paramegaera;Italy;GenBank;-;MH418841  
 Lepidoptera;Pieridae;Pieris;Pieris rapae;Italy;GenBank;-;MH418842  
 Lepidoptera;Nymphalidae;Lasiommata;Lasiommata megera;Italy;GenBank;-;MH418844  
 Lepidoptera;Pieridae;Pontia;Pieris edusa;Italy;GenBank;-;MH418849  
 Lepidoptera ;Lycaenidae;Lampides;Lampides boeticus;Malta;GenBank;-;MH418850  
 Lepidoptera;Pieridae;Pieris;Pieris rapae;Italy;GenBank;-;MH418860  
 Lepidoptera;Nymphalidae;Vanessa;Vanessa atalanta;Italy;GenBank;-;MH418863  
 Lepidoptera;Pieridae;Pieris;Pieris rapae;France;GenBank;-;MH418874  
 Lepidoptera;Lycaenidae;Celastrina;Celastrina argiolus;Italy;GenBank;-;MH418875  
 Lepidoptera ;Pieridae;Gonepteryx;Gonepteryx cleopatra;Italy;GenBank;-;MH418879  
 Lepidoptera;Pieridae;Pieris;Pieris rapae;Italy;GenBank;-;MH418889  
 Lepidoptera;Lycaenidae;Lycaena;Lycaena phlaeas;Italy;GenBank;-;MH418898  
 Lepidoptera;Nymphalidae;Pyronia;Pyronia cecilia;France;Bold;WMB2638-13;MH418906  
 Lepidoptera ;Lycaenidae;Leptotes;Leptotes pirithous;Italy;GenBank;-;MH418910  
 Lepidoptera;Lycaenidae;Lycaena;Lycaena phlaeas;Italy;GenBank;-;MH418913  
 Lepidoptera;Nymphalidae;Charaxes;Charaxes jasius;Italy;GenBank;-;MH418915  
 Lepidoptera;Papilionidae;Papilio;Papilio machaon;Italy;GenBank;-;MH418929  
 Lepidoptera ;Hesperiidae;Carcharodus;Carcharodus alceae;Italy;GenBank;-;MH418938  
 Lepidoptera;Papilionidae;Papilio;Papilio machaon;Italy;GenBank;-;MH418943  
 Lepidoptera;Pieridae;Pieris;Pieris rapae;Italy;GenBank;-;MH418965  
 Lepidoptera;Lycaenidae;Callophrys;Callophrys rubi;Italy;GenBank;-;MH418972  
 Lepidoptera;Nymphalidae;Limenitis;Limenitis reducta;France;GenBank;-;MH418978

Lepidoptera;Lycaenidae;Lycaena;Lycaena phlaeas;Italy;GenBank;-;MH418987  
 Lepidoptera;Nymphalidae;Lasiommata;Lasiommata megera;Italy;GenBank;-;MH419002  
 Lepidoptera;Pieridae;Pieris;Pieris rapae;Italy;GenBank;-;MH419003  
 Lepidoptera;Nymphalidae;Pyronia;Pyronia cecilia;Italy;Bold;WMB064-11;MH419008  
 Lepidoptera;Pieridae;Pontia;Pieris edusa;Italy;GenBank;-;MH419010  
 Lepidoptera;Papilionidae;Papilio;Papilio machaon;Malta;GenBank;-;MH419011  
 Lepidoptera;Lycaenidae;Lycaena;Lycaena phlaeas;France;GenBank;-;MH419015  
 Lepidoptera;Pieridae;Pieris;Pieris rapae;Italy;GenBank;-;MH419016  
 Lepidoptera;Papilionidae;Papilio;Papilio machaon;Italy;GenBank;-;MH419019  
 Lepidoptera;Pieridae;Pieris;Pieris manni;Italy;GenBank;-;MH419022  
 Lepidoptera;Nymphalidae;Melitaea;Melitaea didyma;Italy;GenBank;-;MH419023  
 Lepidoptera;Pieridae;Pieris;Pieris rapae;Italy;GenBank;-;MH419031  
 Lepidoptera;Pieridae;Pieris;Pieris rapae;Italy;GenBank;-;MH419040  
 Lepidoptera;Papilionidae;Papilio;Papilio machaon;Italy;GenBank;-;MH419041  
 Lepidoptera;Lycaenidae;Lycaena;Lycaena phlaeas;France;GenBank;-;MH419043  
 Lepidoptera;Nymphalidae;Pyronia;Pyronia cecilia;Italy;Bold;WMB4607-14;MH419047  
 Lepidoptera;Lycaenidae;Lampides;Lampides boeticus;Italy;GenBank;-;MH419057  
 Lepidoptera;Nymphalidae;Pyronia;Pyronia tithonus;France;Bold;WMB1529-13;MH419066  
 Lepidoptera;Pieridae;Pieris;Pieris brassicae;Italy;GenBank;-;MH419067  
 Lepidoptera;Hesperiidae;Spialia;Spialia sertorius;Italy;GenBank;-;MH419085  
 Lepidoptera;Nymphalidae;Lasiommata;Lasiommata megera;Italy;GenBank;-;MH419088  
 Lepidoptera;Pieridae;Pieris;Pieris brassicae;Italy;GenBank;-;MH419090  
 Lepidoptera;Pieridae;Pieris;Pieris rapae;Malta;GenBank;-;MH419099  
 Lepidoptera;Nymphalidae;Lasiommata;Lasiommata megera;Italy;GenBank;-;MH419103  
 Lepidoptera;Nymphalidae;Pyronia;Pyronia cecilia;Italy;Bold;WMB1947-13;MH419104  
 Lepidoptera;Pieridae;Pieris;Pieris manni;Italy;GenBank;-;MH419112  
 Lepidoptera;Lycaenidae;Lampides;Lampides boeticus;Italy;GenBank;-;MH419113  
 Lepidoptera;Nymphalidae;Lasiommata;Lasiommata paramegaera;Italy;GenBank;-;MH419115  
 Lepidoptera;Lycaenidae;Lampides;Lampides boeticus;Italy;GenBank;-;MH419119  
 Lepidoptera;Lycaenidae;Celastrina;Celastrina argiolus;Malta;GenBank;-;MH419123  
 Lepidoptera;Nymphalidae;Lasiommata;Lasiommata megera;Italy;GenBank;-;MH419125  
 Lepidoptera;Lycaenidae;Celastrina;Celastrina argiolus;Italy;GenBank;-;MH419142  
 Lepidoptera;Nymphalidae;Lasiommata;Lasiommata paramegaera;Italy;GenBank;-;MH419152  
 Lepidoptera;Nymphalidae;Lasiommata;Lasiommata megera;Italy;GenBank;-;MH419162  
 Lepidoptera;Nymphalidae;Lasiommata;Lasiommata megera;Italy;GenBank;-;MH419168  
 Lepidoptera;Nymphalidae;Lasiommata;Lasiommata paramegaera;France;GenBank;-;MH419169  
 Lepidoptera;Papilionidae;Papilio;Papilio machaon;Malta;GenBank;-;MH419173  
 Lepidoptera;Nymphalidae;Lasiommata;Lasiommata megera;Italy;GenBank;-;MH419174  
 Lepidoptera;Nymphalidae;Coenonympha;Coenonympha corinna;Italy;GenBank;-;MH419179  
 Lepidoptera;Nymphalidae;Lasiommata;Lasiommata megera;Italy;GenBank;-;MH419181  
 Lepidoptera;Hesperiidae;Gegenes;Gegenes pumilio;Italy;GenBank;-;MH419194  
 Lepidoptera;Pieridae;Gonepteryx;Gonepteryx cleopatra;Italy;GenBank;-;MH419198  
 Lepidoptera;Pieridae;Pieris;Pieris rapae;Italy;GenBank;-;MH419199  
 Lepidoptera;Nymphalidae;Lasiommata;Lasiommata megera;Italy;GenBank;-;MH419201  
 Lepidoptera;Lycaenidae;Leptotes;Leptotes pirithous;Italy;GenBank;-;MH419207  
 Lepidoptera;Lycaenidae;Celastrina;Celastrina argiolus;Italy;GenBank;-;MH419216  
 Lepidoptera;Lycaenidae;Lampides;Lampides boeticus;Italy;GenBank;-;MH419228  
 Lepidoptera;Nymphalidae;Coenonympha;Coenonympha pamphilus;France;GenBank;-;MH419231  
 Lepidoptera;Papilionidae;Papilio;Papilio machaon;Italy;GenBank;-;MH419239  
 Lepidoptera;Papilionidae;Papilio;Papilio machaon;Italy;GenBank;-;MH419240  
 Lepidoptera;Lycaenidae;Leptotes;Leptotes pirithous;Italy;GenBank;-;MH419257  
 Lepidoptera;Lycaenidae;Lycaena;Lycaena phlaeas;Italy;GenBank;-;MH419258  
 Lepidoptera;Nymphalidae;Argynnis;Argynnis pandora;Italy;GenBank;-;MH419261  
 Lepidoptera;Pieridae;Pontia;Pieris edusa;Italy;GenBank;-;MH419265  
 Lepidoptera;Nymphalidae;Lasiommata;Lasiommata megera;Italy;GenBank;-;MH419269  
 Lepidoptera;Lycaenidae;Glaucopsyche;Glaucopsyche alexis;Italy;GenBank;-;MH419276  
 Lepidoptera;Nymphalidae;Vanessa;Vanessa atalanta;Italy;GenBank;-;MH419278  
 Lepidoptera;Pieridae;Pieris;Pieris brassicae;Italy;GenBank;-;MH419297  
 Lepidoptera;Pieridae;Pieris;Pieris rapae;Italy;GenBank;-;MH419298  
 Lepidoptera;Nymphalidae;Pyronia;Pyronia cecilia;Italy;Bold;WMB065-11;MH419301  
 Lepidoptera;Nymphalidae;Vanessa;Vanessa cardui;Italy;GenBank;-;MH419312  
 Lepidoptera;Pieridae;Pontia;Pieris edusa;Italy;GenBank;-;MH419313  
 Lepidoptera;Papilionidae;Papilio;Papilio machaon;Italy;GenBank;-;MH419314  
 Lepidoptera;Nymphalidae;Lasiommata;Lasiommata paramegaera;Italy;GenBank;-;MH419317  
 Lepidoptera;Nymphalidae;Pyronia;Pyronia cecilia;Italy;Bold;WMB1935-13;MH419319  
 Lepidoptera;Lycaenidae;Lycaena;Lycaena phlaeas;Italy;GenBank;-;MH419323  
 Lepidoptera;Lycaenidae;Celastrina;Celastrina argiolus;Italy;GenBank;-;MH419324  
 Lepidoptera;Lycaenidae;Leptotes;Leptotes pirithous;Italy;GenBank;-;MH419332  
 Lepidoptera;Pieridae;Pieris;Pieris brassicae;Italy;GenBank;-;MH419335  
 Lepidoptera;Nymphalidae;Pyronia;Pyronia cecilia;Italy;Bold;WMB2761-13;MH419336  
 Lepidoptera;Lycaenidae;Lycaena;Lycaena phlaeas;Italy;GenBank;-;MH419338  
 Lepidoptera;Nymphalidae;Vanessa;Vanessa atalanta;Italy;GenBank;-;MH419344  
 Lepidoptera;Nymphalidae;Pyronia;Pyronia cecilia;Italy;Bold;WMB5927-17;MH419348  
 Lepidoptera;Nymphalidae;Lasiommata;Lasiommata megera;Italy;GenBank;-;MH419354  
 Lepidoptera;Pieridae;Leptidea;Leptidea sinapis;France;GenBank;-;MH419356  
 Lepidoptera;Nymphalidae;Argynnis;Argynnis pandora;Italy;GenBank;-;MH419361  
 Lepidoptera;Nymphalidae;Vanessa;Vanessa cardui;France;GenBank;-;MH419362  
 Lepidoptera;Lycaenidae;Glaucopsyche;Glaucopsyche alexis;Italy;GenBank;-;MH419369

Lepidoptera;Nymphalidae;Lasiommata;Lasiommata megera;Italy;GenBank;-;MH419370  
 Lepidoptera;Nymphalidae;Vanessa;Vanessa cardui;Italy;GenBank;-;MH419375  
 Lepidoptera;Nymphalidae;Pyronia;Pyronia cecilia;Italy;Bold;WMB5929-17;MH419381  
 Lepidoptera;Pieridae;Pontia;Pieris edusa;Italy;GenBank;-;MH419393  
 Lepidoptera;Hesperiidae;Gegenes;Gegenes pumilio;Italy;GenBank;-;MH419396  
 Lepidoptera;Lycaenidae;Lampides;Lampides boeticus;Italy;GenBank;-;MH419397  
 Lepidoptera;Hesperiidae;Carcharodus;Carcharodus alceae;Italy;GenBank;-;MH419401  
 Lepidoptera;Pieridae;Gonepteryx;Gonepteryx cleopatra;France;GenBank;-;MH419402  
 Lepidoptera;Pieridae;Pieris;Pieris brassicae;Italy;GenBank;-;MH419403  
 Lepidoptera;Nymphalidae;Pyronia;Pyronia cecilia;Italy;Bold;WMB5928-17;MH419405  
 Lepidoptera;Nymphalidae;Coenonympha;Coenonympha pamphilus;Italy;GenBank;-;MH419419  
 Lepidoptera;Nymphalidae;Coenonympha;Coenonympha pamphilus;Italy;GenBank;-;MH419421  
 Lepidoptera;Lycaenidae;Leptotes;Leptotes pirithous;Italy;GenBank;-;MH419431  
 Lepidoptera;Lycaenidae;Leptotes;Leptotes pirithous;Italy;GenBank;-;MH419436  
 Lepidoptera;Lycaenidae;Lampides;Lampides boeticus;France;GenBank;-;MH419439  
 Lepidoptera;Hesperiidae;Carcharodus;Carcharodus alceae;Italy;GenBank;-;MH419441  
 Lepidoptera;Nymphalidae;Issoria;Issoria lathonia;Italy;GenBank;-;MH419442  
 Lepidoptera;Pieridae;Pieris;Pieris brassicae;Italy;GenBank;-;MH419460  
 Lepidoptera;Lycaenidae;Aricia;Aricia agestis;Italy;GenBank;-;MH419470  
 Lepidoptera;Nymphalidae;Coenonympha;Coenonympha pamphilus;Italy;GenBank;-;MH419476  
 Lepidoptera;Lycaenidae;Leptotes;Leptotes pirithous;Italy;GenBank;-;MH419483  
 Lepidoptera;Lycaenidae;Lampides;Lampides boeticus;Italy;GenBank;-;MH419484  
 Lepidoptera;Pieridae;Gonepteryx;Gonepteryx cleopatra;Italy;GenBank;-;MH419490  
 Lepidoptera;Pieridae;Pieris;Pieris rapae;Italy;GenBank;-;MH419491  
 Lepidoptera;Hesperiidae;Carcharodus;Carcharodus alceae;Italy;GenBank;-;MH419492  
 Lepidoptera;Pieridae;Pieris;Pieris rapae;Italy;GenBank;-;MH419497  
 Lepidoptera;Nymphalidae;Charaxes;Charaxes jasius;Italy;GenBank;-;MH419500  
 Lepidoptera;Pieridae;Pieris;Pieris rapae;Italy;GenBank;-;MH419509  
 Lepidoptera;Nymphalidae;Coenonympha;Coenonympha pamphilus;Italy;GenBank;-;MH419513  
 Lepidoptera;Nymphalidae;Melitaea;Melitaea nevadensis;Italy;GenBank;-;MH419515  
 Lepidoptera;Pieridae;Gonepteryx;Gonepteryx cleopatra;Italy;GenBank;-;MH419516  
 Lepidoptera;Pieridae;Pontia;Pieris edusa;Italy;GenBank;-;MH419521  
 Lepidoptera;Nymphalidae;Coenonympha;Coenonympha pamphilus;France;GenBank;-;MH419522  
 Lepidoptera;Pieridae;Gonepteryx;Gonepteryx cleopatra;Italy;GenBank;-;MH419524  
 Lepidoptera;Pieridae;Pieris;Pieris rapae;France;GenBank;-;MH419525  
 Lepidoptera;Lycaenidae;Celastrina;Celastrina argiolus;Italy;GenBank;-;MH419527  
 Lepidoptera;Pieridae;Pieris;Pieris rapae;Italy;GenBank;-;MH419529  
 Lepidoptera;Nymphalidae;Lasiommata;Lasiommata paramegaera;France;GenBank;-;MH419543  
 Lepidoptera;Lycaenidae;Leptotes;Leptotes pirithous;Italy;GenBank;-;MH419544  
 Lepidoptera;Nymphalidae;Vanessa;Vanessa atalanta;Italy;GenBank;-;MH419549  
 Lepidoptera;Lycaenidae;Lycaena;Lycaena phlaeas;France;GenBank;-;MH419555  
 Lepidoptera;Pieridae;Pieris;Pieris rapae;Italy;GenBank;-;MH419559  
 Lepidoptera;Pieridae;Pontia;Pieris edusa;Italy;GenBank;-;MH419560  
 Lepidoptera;Pieridae;Pieris;Pieris brassicae;Italy;GenBank;-;MH419566  
 Lepidoptera;Lycaenidae;Lampides;Lampides boeticus;Italy;GenBank;-;MH419569  
 Lepidoptera;Lycaenidae;Lycaena;Lycaena phlaeas;Italy;GenBank;-;MH419576  
 Lepidoptera;Nymphalidae;Charaxes;Charaxes jasius;Italy;GenBank;-;MH419585  
 Lepidoptera;Nymphalidae;Lasiommata;Lasiommata megera;Italy;GenBank;-;MH419587  
 Lepidoptera;Nymphalidae;Coenonympha;Coenonympha corinna;Italy;GenBank;-;MH419590  
 Lepidoptera;Nymphalidae;Pyronia;Pyronia tithonus;France;Bold;WMB1528-13;MH419591  
 Lepidoptera;Nymphalidae;Vanessa;Vanessa cardui;Italy;GenBank;-;MH419594  
 Lepidoptera;Nymphalidae;Lasiommata;Lasiommata megera;Italy;GenBank;-;MH419599  
 Lepidoptera;Lycaenidae;Celastrina;Celastrina argiolus;Italy;GenBank;-;MH419621  
 Lepidoptera;Pieridae;Pieris;Pieris rapae;Malta;GenBank;-;MH419630  
 Lepidoptera;Pieridae;Pieris;Pieris brassicae;Italy;GenBank;-;MH419640  
 Lepidoptera;Nymphalidae;Pyronia;Pyronia cecilia;Italy;Bold;WMB2775-13;MH419642  
 Lepidoptera;Pieridae;Euchloe;Euchloe ausonia;Italy;GenBank;-;MH419647  
 Lepidoptera;Lycaenidae;Lycaena;Lycaena phlaeas;Italy;GenBank;-;MH419653  
 Lepidoptera;Lycaenidae;Celastrina;Celastrina argiolus;Italy;GenBank;-;MH419657  
 Lepidoptera;Lycaenidae;Lampides;Lampides boeticus;Italy;GenBank;-;MH419658  
 Lepidoptera;Nymphalidae;Lasiommata;Lasiommata paramegaera;Italy;GenBank;-;MH419660  
 Lepidoptera;Nymphalidae;Lasiommata;Lasiommata megera;Malta;GenBank;-;MH419663  
 Lepidoptera;Papilionidae;Papilio;Papilio machaon;Italy;GenBank;-;MH419665  
 Lepidoptera;Nymphalidae;Pyronia;Pyronia cecilia;Italy;Bold;WMB1934-13;MH419667  
 Lepidoptera;Hesperiidae;Gegenes;Gegenes pumilio;Italy;GenBank;-;MH419668  
 Lepidoptera;Nymphalidae;Melitaea;Melitaea didyma;Italy;GenBank;-;MH419673  
 Lepidoptera;Nymphalidae;Pyronia;Pyronia cecilia;Italy;Bold;WMB656-11;MH419675  
 Lepidoptera;Nymphalidae;Lasiommata;Lasiommata megera;Italy;GenBank;-;MH419680  
 Lepidoptera;Nymphalidae;Charaxes;Charaxes jasius;Italy;GenBank;-;MH419687  
 Lepidoptera;Pieridae;Pieris;Pieris rapae;Malta;GenBank;-;MH419690  
 Lepidoptera;Hesperiidae;Thymelicus;Thymelicus acteon;Italy;GenBank;-;MH419692  
 Lepidoptera;Lycaenidae;Callophrys;Callophrys rubi;Italy;GenBank;-;MH419693  
 Lepidoptera;Nymphalidae;Vanessa;Vanessa cardui;Italy;GenBank;-;MH419702  
 Lepidoptera;Hesperiidae;Carcharodus;Carcharodus alceae;Italy;GenBank;-;MH419708  
 Lepidoptera;Papilionidae;Papilio;Papilio machaon;Italy;GenBank;-;MH419718  
 Lepidoptera;Pieridae;Pieris;Pieris rapae;Italy;GenBank;-;MH419719  
 Lepidoptera;Nymphalidae;Lasiommata;Lasiommata paramegaera;Italy;GenBank;-;MH419720

Lepidoptera;Lycaenidae;Celastrina;Celastrina argiolus;France;GenBank;-;MH419723  
 Lepidoptera ;Hesperiidae;Gegenes;Gegenes pumilio;Italy;GenBank;-;MH419725  
 Lepidoptera;Pieridae;Pieris;Pieris mannii;Italy;GenBank;-;MH419729  
 Lepidoptera;Nymphalidae;Pyronia;Pyronia cecilia;Italy;Bold;WMB517-11;MH419733  
 Lepidoptera;Nymphalidae;Lasiommata;Lasiommata paramegaera;Italy;GenBank;-;MH419734  
 Lepidoptera ;Lycaenidae;Lampides;Lampides boeticus;Italy;GenBank;-;MH419738  
 Lepidoptera ;Pieridae;Gonepteryx;Gonepteryx cleopatra;Italy;GenBank;-;MH419740  
 Lepidoptera;Pieridae;Pieris;Pieris rapae;Italy;GenBank;-;MH419742  
 Lepidoptera;Nymphalidae;Coenonympha;Coenonympha corinna;Italy;GenBank;-;MH419750  
 Lepidoptera;Nymphalidae;Vanessa;Vanessa atalanta;Italy;GenBank;-;MH419755  
 Lepidoptera ;Pieridae;Gonepteryx;Gonepteryx cleopatra;Italy;GenBank;-;MH419759  
 Lepidoptera ;Hesperiidae;Gegenes;Gegenes pumilio;Italy;GenBank;-;MH419761  
 Lepidoptera;Pieridae;Pieris;Pieris rapae;Italy;GenBank;-;MH419770  
 Lepidoptera;Lycaenidae;Lycaena;Lycaena phlaeas;Italy;GenBank;-;MH419772  
 Lepidoptera ;Pieridae;Gonepteryx;Gonepteryx cleopatra;Italy;GenBank;-;MH419779  
 Lepidoptera;Pieridae;Pontia;Pieris edusa;Italy;GenBank;-;MH419781  
 Lepidoptera;Lycaenidae;Celastrina;Celastrina argiolus;Italy;GenBank;-;MH419785  
 Lepidoptera ;Hesperiidae;Carcharodus;Carcharodus alceae;Italy;GenBank;-;MH419796  
 Lepidoptera;Nymphalidae;Vanessa;Vanessa cardui;Italy;GenBank;-;MH419799  
 Lepidoptera ;Pieridae;Gonepteryx;Gonepteryx cleopatra;Malta;GenBank;-;MH419805  
 Lepidoptera;Nymphalidae;Vanessa;Vanessa atalanta;Italy;GenBank;-;MH419809  
 Lepidoptera;Pieridae;Pieris;Pieris rapae;Italy;GenBank;-;MH419815  
 Lepidoptera;Nymphalidae;Lasiommata;Lasiommata paramegaera;Italy;GenBank;-;MH419816  
 Lepidoptera ;Lycaenidae;Lampides;Lampides boeticus;Italy;GenBank;-;MH419824  
 Lepidoptera;Lycaenidae;Callophrys;Callophrys rubi;Italy;GenBank;-;MH419831  
 Lepidoptera;Nymphalidae;Vanessa;Vanessa atalanta;Italy;GenBank;-;MH419832  
 Lepidoptera ;Pieridae;Gonepteryx;Gonepteryx cleopatra;Italy;GenBank;-;MH419833  
 Lepidoptera;Pieridae;Pieris;Pieris rapae;Italy;GenBank;-;MH419839  
 Lepidoptera ;Lycaenidae;Lampides;Lampides boeticus;Italy;GenBank;-;MH419842  
 Lepidoptera ;Pieridae;Gonepteryx;Gonepteryx cleopatra;France;GenBank;-;MH419843  
 Lepidoptera;Nymphalidae;Lasiommata;Lasiommata megera;Italy;GenBank;-;MH419851  
 Lepidoptera ;Pieridae;Gonepteryx;Gonepteryx cleopatra;Italy;GenBank;-;MH419855  
 Lepidoptera;Nymphalidae;Vanessa;Vanessa atalanta;Italy;GenBank;-;MH419859  
 Lepidoptera;Lycaenidae;Lycaena;Lycaena phlaeas;Italy;GenBank;-;MH419879  
 Lepidoptera ;Hesperiidae;Carcharodus;Carcharodus alceae;Italy;GenBank;-;MH419880  
 Lepidoptera;Lycaenidae;Celastrina;Celastrina argiolus;Italy;GenBank;-;MH419896  
 Lepidoptera;Papilionidae;Papilio;Papilio machaon;Italy;GenBank;-;MH419910  
 Lepidoptera;Nymphalidae;Coenonympha;Coenonympha pamphilus;Italy;GenBank;-;MH419911  
 Lepidoptera;Nymphalidae;Lasiommata;Lasiommata megera;Italy;GenBank;-;MH419920  
 Lepidoptera;Nymphalidae;Coenonympha;Coenonympha corinna;Italy;GenBank;-;MH419925  
 Lepidoptera;Pieridae;Pieris;Pieris rapae;Italy;GenBank;-;MH419926  
 Lepidoptera;Nymphalidae;Lasiommata;Lasiommata paramegaera;France;GenBank;-;MH419927  
 Lepidoptera;Papilionidae;Papilio;Papilio machaon;Malta;GenBank;-;MH419932  
 Lepidoptera ;Lycaenidae;Leptotes;Leptotes pirithous;Italy;GenBank;-;MH419935  
 Lepidoptera;Nymphalidae;Lasiommata;Lasiommata megera;Italy;GenBank;-;MH419937  
 Lepidoptera;Pieridae;Pieris;Pieris rapae;Italy;GenBank;-;MH419942  
 Lepidoptera;Nymphalidae;Coenonympha;Coenonympha corinna;Italy;GenBank;-;MH419945  
 Lepidoptera;Nymphalidae;Maniola;Maniola jurtina;France;GenBank;-;MH419946  
 Lepidoptera ;Lycaenidae;Lampides;Lampides boeticus;Italy;GenBank;-;MH419950  
 Lepidoptera;Pieridae;Pieris;Pieris brassicae;Italy;GenBank;-;MH419952  
 Lepidoptera ;Lycaenidae;Lampides;Lampides boeticus;France;GenBank;-;MH419965  
 Lepidoptera;Pieridae;Pieris;Pieris mannii;Italy;GenBank;-;MH419969  
 Lepidoptera;Pieridae;Leptidea;Leptidea sinapis;Italy;GenBank;-;MH419970  
 Lepidoptera;Nymphalidae;Pyronia;Pyronia cecilia;Italy;Bold;WMB2788-13;MH419971  
 Lepidoptera;Nymphalidae;Lasiommata;Lasiommata paramegaera;Italy;GenBank;-;MH419974  
 Lepidoptera ;Lycaenidae;Leptotes;Leptotes pirithous;Italy;GenBank;-;MH419975  
 Lepidoptera ;Hesperiidae;Gegenes;Gegenes pumilio;Italy;GenBank;-;MH419977  
 Lepidoptera;Nymphalidae;Lasiommata;Lasiommata megera;Italy;GenBank;-;MH419982  
 Lepidoptera;Lycaenidae;Lycaena;Lycaena phlaeas;Italy;GenBank;-;MH419984  
 Lepidoptera ;Lycaenidae;Leptotes;Leptotes pirithous;Italy;GenBank;-;MH419988  
 Lepidoptera ;Lycaenidae;Leptotes;Leptotes pirithous;Italy;GenBank;-;MH419990  
 Lepidoptera;Nymphalidae;Lasiommata;Lasiommata megera;Italy;GenBank;-;MH419996  
 Lepidoptera ;Lycaenidae;Lampides;Lampides boeticus;Italy;GenBank;-;MH420003  
 Lepidoptera;Pieridae;Pieris;Pieris mannii;Italy;GenBank;-;MH420005  
 Lepidoptera;Nymphalidae;Lasiommata;Lasiommata megera;Italy;GenBank;-;MH420011  
 Lepidoptera;Nymphalidae;Hipparchia;Hipparchia aristaeus;Italy;GenBank;-;MH420016  
 Lepidoptera ;Lycaenidae;Lampides;Lampides boeticus;Malta;GenBank;-;MH420024  
 Lepidoptera;Nymphalidae;Lasiommata;Lasiommata megera;Italy;GenBank;-;MH420033  
 Lepidoptera;Lycaenidae;Celastrina;Celastrina argiolus;Italy;GenBank;-;MH420035  
 Lepidoptera ;Lycaenidae;Leptotes;Leptotes pirithous;Italy;GenBank;-;MH420040  
 Lepidoptera;Pieridae;Euchloe;Euchloe ausonia;Italy;GenBank;-;MH420042  
 Lepidoptera;Nymphalidae;Lasiommata;Lasiommata megera;Italy;GenBank;-;MH420051  
 Lepidoptera;Nymphalidae;Lasiommata;Lasiommata megera;Italy;GenBank;-;MH420055  
 Lepidoptera ;Hesperiidae;Gegenes;Gegenes pumilio;Italy;GenBank;-;MH420056  
 Lepidoptera;Nymphalidae;Lasiommata;Lasiommata megera;Malta;GenBank;-;MH420061  
 Lepidoptera;Papilionidae;Papilio;Papilio machaon;Malta;GenBank;-;MH420063  
 Lepidoptera;Lycaenidae;Lycaena;Lycaena phlaeas;Italy;GenBank;-;MH420069  
 Lepidoptera;Lycaenidae;Lycaena;Lycaena phlaeas;Italy;GenBank;-;MH420073

Lepidoptera;Nymphalidae;Lasiommata;Lasiommata megera;Italy;GenBank;-;MH420076  
 Lepidoptera ;Lycaenidae;Lampides;Lampides boeticus;Italy;GenBank;-;MH420085  
 Lepidoptera;Pieridae;Anthocharis;Anthocharis cardamines;Italy;GenBank;-;MH420092  
 Lepidoptera ;Lycaenidae;Leptotes;Leptotes pirithous;Italy;GenBank;-;MH420118  
 Lepidoptera;Nymphalidae;Vanessa;Vanessa cardui;Italy;GenBank;-;MH420133  
 Lepidoptera;Pieridae;Pieris;Pieris rapae;Malta;GenBank;-;MH420135  
 Lepidoptera;Nymphalidae;Pyronia;Pyronia cecilia;Italy;Bold;WMB1807-13;MH420138  
 Lepidoptera;Lycaenidae;Celastrina;Celastrina argiolus;Italy;GenBank;-;MH420143  
 Lepidoptera;Nymphalidae;Pyronia;Pyronia cecilia;Italy;Bold;WMB4601-14;MH420145  
 Lepidoptera;Nymphalidae;Vanessa;Vanessa atalanta;Italy;GenBank;-;MH420146  
 Lepidoptera;Nymphalidae;Vanessa;Vanessa atalanta;Italy;GenBank;-;MH420153  
 Lepidoptera;Lycaenidae;Lycaena;Lycaena phlaeas;Italy;GenBank;-;MH420158  
 Lepidoptera;Papilionidae;Papilio;Papilio machaon;Italy;GenBank;-;MH420159  
 Lepidoptera ;Hesperiidae;Carcharodus;Carcharodus alceae;Italy;GenBank;-;MH420164  
 Lepidoptera;Nymphalidae;Lasiommata;Lasiommata megera;Italy;GenBank;-;MH420168  
 Lepidoptera;Lycaenidae;Celastrina;Celastrina argiolus;Italy;GenBank;-;MH420170  
 Lepidoptera;Nymphalidae;Coenonympha;Coenonympha pamphilus;France;GenBank;-;MH420173  
 Lepidoptera;Pieridae;Pieris;Pieris rapae;Italy;GenBank;-;MH420174  
 Lepidoptera;Nymphalidae;Coenonympha;Coenonympha corinna;Italy;GenBank;-;MH420175  
 Lepidoptera ;Lycaenidae;Lampides;Lampides boeticus;Italy;GenBank;-;MH420176  
 Lepidoptera ;Lycaenidae;Leptotes;Leptotes pirithous;Italy;GenBank;-;MH420178  
 Lepidoptera ;Hesperiidae;Carcharodus;Carcharodus alceae;Italy;GenBank;-;MH420180  
 Lepidoptera;Nymphalidae;Lasiommata;Lasiommata megera;Italy;GenBank;-;MH420189  
 Lepidoptera;Nymphalidae;Lasiommata;Lasiommata paramegaera;Italy;GenBank;-;MH420194  
 Lepidoptera;Nymphalidae;Vanessa;Vanessa cardui;Italy;GenBank;-;MH420196  
 Lepidoptera ;Pieridae;Gonepteryx;Gonepteryx cleopatra;Italy;GenBank;-;MH420199  
 Lepidoptera;Pieridae;Pieris;Pieris mannii;Italy;GenBank;-;MH420202  
 Lepidoptera;Nymphalidae;Lasiommata;Lasiommata megera;Italy;GenBank;-;MH420204  
 Lepidoptera;Pieridae;Pieris;Pieris rapae;Italy;GenBank;-;MH420205  
 Lepidoptera;Lycaenidae;Celastrina;Celastrina argiolus;Italy;GenBank;-;MH420209  
 Lepidoptera;Pieridae;Pieris;Pieris rapae;Italy;GenBank;-;MH420210  
 Lepidoptera;Nymphalidae;Pyronia;Pyronia cecilia;Italy;Bold;WMB1922-13;MH420212  
 Lepidoptera;Nymphalidae;Lasiommata;Lasiommata paramegaera;France;GenBank;-;MH420214  
 Lepidoptera;Nymphalidae;Vanessa;Vanessa atalanta;Italy;GenBank;-;MH420217  
 Lepidoptera;Pieridae;Pieris;Pieris brassicae;Italy;GenBank;-;MH420218  
 Lepidoptera;Nymphalidae;Lasiommata;Lasiommata megera;Italy;GenBank;-;MH420224  
 Lepidoptera;Nymphalidae;Coenonympha;Coenonympha corinna;Italy;GenBank;-;MH420226  
 Lepidoptera;Lycaenidae;Lycaena;Lycaena phlaeas;Italy;GenBank;-;MH420232  
 Lepidoptera ;Lycaenidae;Lampides;Lampides boeticus;Italy;GenBank;-;MH420233  
 Lepidoptera;Pieridae;Euchloe;Euchloe ausonia;Italy;GenBank;-;MH420238  
 Lepidoptera;Nymphalidae;Vanessa;Vanessa cardui;Italy;GenBank;-;MH420240  
 Lepidoptera;Nymphalidae;Pyronia;Pyronia cecilia;Italy;Bold;WMB1061-13;MH420246  
 Lepidoptera;Nymphalidae;Coenonympha;Coenonympha corinna;Italy;GenBank;-;MH420251  
 Lepidoptera;Nymphalidae;Pyronia;Pyronia cecilia;Italy;Bold;WMB542-11;MH420253  
 Lepidoptera;Nymphalidae;Pyronia;Pyronia cecilia;Italy;Bold;WMB2766-13;MH420262  
 Lepidoptera;Pieridae;Pieris;Pieris rapae;Italy;GenBank;-;MH420266  
 Lepidoptera;Nymphalidae;Vanessa;Vanessa cardui;Italy;GenBank;-;MH420271  
 Lepidoptera;Pieridae;Pieris;Pieris rapae;Italy;GenBank;-;MH420274  
 Lepidoptera;Lycaenidae;Celastrina;Celastrina argiolus;Italy;GenBank;-;MH420275  
 Lepidoptera;Nymphalidae;Coenonympha;Coenonympha pamphilus;Italy;GenBank;-;MH420277  
 Lepidoptera ;Pieridae;Gonepteryx;Gonepteryx rhamni;Italy;GenBank;-;MH420280  
 Lepidoptera ;Lycaenidae;Leptotes;Leptotes pirithous;Italy;GenBank;-;MH420283  
 Lepidoptera ;Lycaenidae;Lampides;Lampides boeticus;Italy;GenBank;-;MH420284  
 Lepidoptera;Nymphalidae;Coenonympha;Coenonympha corinna;Italy;GenBank;-;MH420287  
 Lepidoptera;Nymphalidae;Hipparchia;Hipparchia aristaeus;Italy;GenBank;-;MH420289  
 Lepidoptera;Nymphalidae;Lasiommata;Lasiommata megera;Italy;GenBank;-;MH420294  
 Lepidoptera;Nymphalidae;Charaxes;Charaxes jasius;Italy;GenBank;-;MH420297  
 Lepidoptera;Lycaenidae;Celastrina;Celastrina argiolus;Italy;GenBank;-;MH420301  
 Lepidoptera;Nymphalidae;Argynnis;Argynnis pandora;Italy;GenBank;-;MH420304  
 Lepidoptera;Papilionidae;Papilio;Papilio machaon;France;GenBank;-;MH420311  
 Lepidoptera;Lycaenidae;Lycaena;Lycaena phlaeas;Italy;GenBank;-;MH420315  
 Lepidoptera;Nymphalidae;Lasiommata;Lasiommata megera;Italy;GenBank;-;MH420316  
 Lepidoptera;Lycaenidae;Celastrina;Celastrina argiolus;Italy;GenBank;-;MH420324  
 Lepidoptera;Lycaenidae;Lycaena;Lycaena phlaeas;Italy;GenBank;-;MH420326  
 Lepidoptera;Pieridae;Pieris;Pieris rapae;Italy;GenBank;-;MH420330  
 Lepidoptera;Lycaenidae;Callophrys;Callophrys rubi;Italy;GenBank;-;MH420333  
 Lepidoptera;Nymphalidae;Lasiommata;Lasiommata megera;Italy;GenBank;-;MH420335  
 Lepidoptera;Pieridae;Pieris;Pieris brassicae;Italy;GenBank;-;MH420364  
 Lepidoptera;Lycaenidae;Celastrina;Celastrina argiolus;Italy;GenBank;-;MH420369  
 Lepidoptera;Pieridae;Pieris;Pieris napi;Italy;GenBank;-;MH420372  
 Lepidoptera;Pieridae;Pieris;Pieris brassicae;Italy;GenBank;-;MH420374  
 Lepidoptera ;Hesperiidae;Carcharodus;Carcharodus alceae;Italy;GenBank;-;MH420379  
 Lepidoptera;Nymphalidae;Pyronia;Pyronia cecilia;France;Bold;WMB862-13;MH420382  
 Lepidoptera;Hesperiidae;Pyrgus;Pyrgus armoricanus;Italy;GenBank;-;MH420394  
 Lepidoptera;Pieridae;Pieris;Pieris rapae;Italy;GenBank;-;MH420397  
 Lepidoptera;Nymphalidae;Vanessa;Vanessa cardui;France;GenBank;-;MH420399  
 Lepidoptera;Nymphalidae;Charaxes;Charaxes jasius;Italy;GenBank;-;MH420413  
 Lepidoptera;Nymphalidae;Vanessa;Vanessa cardui;Italy;GenBank;-;MH420417

Lepidoptera;Nymphalidae;Erebia;Erebia manto;Romania;GenBank;-;MH670084  
 Lepidoptera;Nymphalidae;Erebia;Erebia manto;France;GenBank;-;MH670090  
 Lepidoptera;Nymphalidae;Erebia;Erebia manto;France;GenBank;-;MH670105  
 Lepidoptera;Nymphalidae;Erebia;Erebia manto;Bosnia and Herzegovina;GenBank;-;MH670108  
 Lepidoptera;Nymphalidae;Erebia;Erebia manto;Bosnia and Herzegovina;GenBank;-;MH670123  
 Lepidoptera;Nymphalidae;Erebia;Erebia manto;Romania;GenBank;-;MH670131  
 Lepidoptera;Nymphalidae;Erebia;Erebia manto;Romania;GenBank;-;MH670141  
 Lepidoptera;Nymphalidae;Erebia;Erebia manto;Romania;GenBank;-;MH670143  
 Lepidoptera;Nymphalidae;Erebia;Erebia manto;Bosnia and Herzegovina;GenBank;-;MH670153  
 Lepidoptera;Nymphalidae;Erebia;Erebia manto;Bosnia and Herzegovina;GenBank;-;MH670166  
 Lepidoptera;Nymphalidae;Erebia;Erebia manto;Romania;GenBank;-;MH670182  
 Lepidoptera;Nymphalidae;Erebia;Erebia manto;Bosnia and Herzegovina;GenBank;-;MH670201  
 Lepidoptera;Nymphalidae;Erebia;Erebia manto;France;GenBank;-;MH670202  
 Lepidoptera;Nymphalidae;Erebia;Erebia manto;France;GenBank;-;MH670215  
 Lepidoptera;Nymphalidae;Erebia;Erebia manto;Romania;GenBank;-;MH670217  
 Lepidoptera;Nymphalidae;Erebia;Erebia epiphron;Macedonia;GenBank;-;MK155193  
 Lepidoptera;Lycaenidae;Satyrium;Satyrium pruni;Russia;GenBank;-;MK343429  
 Lepidoptera;Lycaenidae;Pseudophilotes;Pseudophilotes baton;Italy;GenBank;-;MK567857  
 Lepidoptera;Papilionidae;Iphiclides;Iphiclides podalirius;Italy;GenBank;-;MK587201  
 Lepidoptera;Hesperiidae;Thymelicus;Thymelicus sylvestris;United Kingdom;GenBank;-;MK812967  
 Lepidoptera;Lycaenidae;Aricia;Aricia agestis;Czech Republic;GenBank;-;MN107394  
 Lepidoptera;Lycaenidae;Aricia;Aricia agestis;Czech Republic;GenBank;-;MN107395  
 Lepidoptera;Nymphalidae;Libythea;Libythea celtis;Italy;GenBank;-;MN138510  
 Lepidoptera;Nymphalidae;Argynnis;Argynnis paphia;Sweden;GenBank;-;MN138517  
 Lepidoptera;Nymphalidae;Coenonympha;Coenonympha pamphilus;United Kingdom;GenBank;-;MN138548  
 Lepidoptera;Pieridae;Pieris;Pieris brassicae;Italy;GenBank;-;MN138552  
 Lepidoptera;Pieridae;Pieris;Pieris rapae;France;GenBank;-;MN138553  
 Lepidoptera;Lycaenidae;Polyommatus;Polyommatus icarus;United Kingdom;GenBank;-;MN138555  
 Lepidoptera;Nymphalidae;Libythea;Libythea celtis;Austria;GenBank;-;MN138556  
 Lepidoptera;Lycaenidae;Lampides;Lampides boeticus;Italy;GenBank;-;MN138557  
 Lepidoptera;Lycaenidae;Celastrina;Celastrina argiolus;Italy;GenBank;-;MN138587  
 Lepidoptera;Lycaenidae;Lycaena;Lycaena phlaeas;Italy;GenBank;-;MN138589  
 Lepidoptera;Hesperiidae;Gegenes;Gegenes nostrodamus;Italy;GenBank;-;MN138601  
 Lepidoptera;Nymphalidae;Coenonympha;Coenonympha corinna;Italy;GenBank;-;MN138602  
 Lepidoptera;Nymphalidae;Maniola;Maniola jurtina;United Kingdom;GenBank;-;MN138630  
 Lepidoptera;Lycaenidae;Celastrina;Celastrina argiolus;United Kingdom;GenBank;-;MN138636  
 Lepidoptera;Hesperiidae;Thymelicus;Thymelicus acteon;Italy;GenBank;-;MN138653  
 Lepidoptera;Papilionidae;Papilio;Papilio machaon;Italy;GenBank;-;MN138654  
 Lepidoptera;Nymphalidae;Maniola;Maniola jurtina;United Kingdom;GenBank;-;MN138659  
 Lepidoptera;Nymphalidae;Hipparchia;Hipparchia fagi;Italy;GenBank;-;MN138679  
 Lepidoptera;Nymphalidae;Melanargia;Melanargia arge;Italy;GenBank;-;MN138692  
 Lepidoptera;Nymphalidae;Vanessa;Vanessa atalanta;Italy;GenBank;-;MN138694  
 Lepidoptera;Lycaenidae;Satyrium;Satyrium ilicis;Italy;GenBank;-;MN138699  
 Lepidoptera;Pieridae;Anthocharis;Anthocharis cardamines;United Kingdom;GenBank;-;MN138700  
 Lepidoptera;Nymphalidae;Hipparchia;Hipparchia leighebi;Italy;GenBank;-;MN138710  
 Lepidoptera;Nymphalidae;Maniola;Maniola jurtina;United Kingdom;GenBank;-;MN138714  
 Lepidoptera;Lycaenidae;Polyommatus;Polyommatus icarus;United Kingdom;GenBank;-;MN138725  
 Lepidoptera;Lycaenidae;Polyommatus;Polyommatus icarus;United Kingdom;GenBank;-;MN138731  
 Lepidoptera;Lycaenidae;Celastrina;Celastrina argiolus;Italy;GenBank;-;MN138745  
 Lepidoptera;Pieridae;Pieris;Pieris manni;Italy;GenBank;-;MN138775  
 Lepidoptera;Nymphalidae;Melitaea;Melitaea nevadensis;Italy;GenBank;-;MN138802  
 Lepidoptera;Pieridae;Euchloe;Euchloe ausonia;Italy;GenBank;-;MN138808  
 Lepidoptera;Nymphalidae;Hipparchia;Hipparchia statilinus;Italy;GenBank;-;MN138838  
 Lepidoptera;Pieridae;Gonepteryx;Gonepteryx cleopatra;Italy;GenBank;-;MN138859  
 Lepidoptera;Nymphalidae;Coenonympha;Coenonympha corinna;Italy;GenBank;-;MN138880  
 Lepidoptera;Nymphalidae;Hipparchia;Hipparchia semele;United Kingdom;GenBank;-;MN138897  
 Lepidoptera;Lycaenidae;Lampides;Lampides boeticus;France;GenBank;-;MN138912  
 Lepidoptera;Pieridae;Pieris;Pieris rapae;France;GenBank;-;MN138915  
 Lepidoptera;Nymphalidae;Maniola;Maniola jurtina;United Kingdom;GenBank;-;MN138916  
 Lepidoptera;Nymphalidae;Maniola;Maniola jurtina;Italy;GenBank;-;MN138918  
 Lepidoptera;Nymphalidae;Polyommatus;Polyommatus c-album;Italy;Bold;OXB836-15;MN138959  
 Lepidoptera;Nymphalidae;Lasiommata;Lasiommata paramegaera;Italy;GenBank;-;MN139015  
 Lepidoptera;Nymphalidae;Hipparchia;Hipparchia leighebi;Italy;GenBank;-;MN139051  
 Lepidoptera;Lycaenidae;Polyommatus;Polyommatus icarus;United Kingdom;GenBank;-;MN139070  
 Lepidoptera;Lycaenidae;Satyrium;Satyrium ilicis;Italy;GenBank;-;MN139072  
 Lepidoptera;Nymphalidae;Maniola;Maniola jurtina;United Kingdom;GenBank;-;MN139094  
 Lepidoptera;Nymphalidae;Melanargia;Melanargia arge;Italy;GenBank;-;MN139098  
 Lepidoptera;Lycaenidae;Hipparchia;Hipparchia sbordonii;Italy;GenBank;-;MN139101  
 Lepidoptera;Nymphalidae;Maniola;Maniola jurtina;United Kingdom;GenBank;-;MN139107  
 Lepidoptera;Lycaenidae;Plebejus;Plebejus argus;United Kingdom;GenBank;-;MN139116  
 Lepidoptera;Nymphalidae;Libythea;Libythea celtis;Austria;GenBank;-;MN139125  
 Lepidoptera;Nymphalidae;Maniola;Maniola jurtina;United Kingdom;GenBank;-;MN139154  
 Lepidoptera;Lycaenidae;Polyommatus;Polyommatus icarus;United Kingdom;GenBank;-;MN139193  
 Lepidoptera;Hesperiidae;Muschampia;Carcharodus flocciferus;Italy;GenBank;-;MN139211  
 Lepidoptera;Nymphalidae;Maniola;Maniola jurtina;United Kingdom;GenBank;-;MN139220  
 Lepidoptera;Nymphalidae;Coenonympha;Coenonympha pamphilus;Italy;GenBank;-;MN139242  
 Lepidoptera;Lycaenidae;Polyommatus;Polyommatus icarus;United Kingdom;GenBank;-;MN139258  
 Lepidoptera;Nymphalidae;Maniola;Maniola jurtina;United Kingdom;GenBank;-;MN139299



Lepidoptera; Pieridae; Pieris; Pieris rapae; Italy; GenBank; -; MN139309  
 Lepidoptera; Nymphalidae; Charaxes; Charaxes jasius; France; GenBank; -; MN139316  
 Lepidoptera; Lycaenidae; Plebejus; Plebejus argus; Slovenia; GenBank; -; MN139324  
 Lepidoptera; Lycaenidae; Lampides; Lampides boeticus; Italy; GenBank; -; MN139332  
 Lepidoptera; Nymphalidae; Melanargia; Melanargia arge; Italy; GenBank; -; MN139340  
 Lepidoptera; Pieridae; Pieris; Pieris napi; United Kingdom; GenBank; -; MN139350  
 Lepidoptera; Hesperidae; Thymelicus; Thymelicus acteon; Italy; GenBank; -; MN139437  
 Lepidoptera; Lycaenidae; Polyommatus; Polyommatus icarus; United Kingdom; GenBank; -; MN139453  
 Lepidoptera; Pieridae; Gonepteryx; Gonepteryx cleopatra; France; GenBank; -; MN139481  
 Lepidoptera; Lycaenidae; Cupido; Cupido minimus; United Kingdom; GenBank; -; MN139515  
 Lepidoptera; Nymphalidae; Pyronia; Pyronia tithonus; France; Bold; OXB1341-15; MN139529  
 Lepidoptera; Nymphalidae; Limenitis; Limenitis reducta; Italy; GenBank; -; MN139556  
 Lepidoptera; Nymphalidae; Lasiommata; Lasiommata megera; Italy; GenBank; -; MN139563  
 Lepidoptera; Pieridae; Pieris; Pieris rapae; Italy; GenBank; -; MN139603  
 Lepidoptera; Nymphalidae; Brintesia; Brintesia circe; France; GenBank; -; MN139613  
 Lepidoptera; Nymphalidae; Pyronia; Pyronia cecilia; Italy; Bold; WMB910-13; MN139622  
 Lepidoptera; Lycaenidae; Phengaris; Maculinea arion; France; GenBank; -; MN139638  
 Lepidoptera; Nymphalidae; Coenonympha; Coenonympha corinna; Italy; GenBank; -; MN139660  
 Lepidoptera; Pieridae; Hipparchia; Hipparchia neapolitana; Italy; GenBank; -; MN139670  
 Lepidoptera; Pieridae; Leptidea; Leptidea juvernica; Slovenia; GenBank; -; MN139694  
 Lepidoptera; Nymphalidae; Brintesia; Brintesia circe; Italy; GenBank; -; MN139721  
 Lepidoptera; Pieridae; Pieris; Pieris napi; United Kingdom; GenBank; -; MN139735  
 Lepidoptera; Pieridae; Pieris; Pieris rapae; Italy; GenBank; -; MN139737  
 Lepidoptera; Pieridae; Pieris; Pieris brassicae; United Kingdom; GenBank; -; MN139746  
 Lepidoptera; Hesperidae; Muschampia; Carcharodus flocciferus; Italy; GenBank; -; MN139748  
 Lepidoptera; Nymphalidae; Lasiommata; Lasiommata megera; Italy; GenBank; -; MN139790  
 Lepidoptera; Pieridae; Pontia; Pieris daplidice; Italy; GenBank; -; MN139791  
 Lepidoptera; Nymphalidae; Hipparchia; Hipparchia leighebi; Italy; GenBank; -; MN139805  
 Lepidoptera; Nymphalidae; Nymphalis; Nymphalis io; France; GenBank; -; MN139816  
 Lepidoptera; Nymphalidae; Hipparchia; Hipparchia leighebi; Italy; GenBank; -; MN139839  
 Lepidoptera; Hesperidae; Thymelicus; Thymelicus acteon; United Kingdom; GenBank; -; MN139848  
 Lepidoptera; Nymphalidae; Coenonympha; Coenonympha corinna; Italy; GenBank; -; MN139863  
 Lepidoptera; Pieridae; Pieris; Pieris napi; United Kingdom; GenBank; -; MN139864  
 Lepidoptera; Nymphalidae; Hipparchia; Hipparchia aristaeus; Italy; GenBank; -; MN139900  
 Lepidoptera; Nymphalidae; Hipparchia; Hipparchia semele; United Kingdom; GenBank; -; MN139919  
 Lepidoptera; Nymphalidae; Melitaea; Melitaea didyma; Italy; GenBank; -; MN139924  
 Lepidoptera; Nymphalidae; Maniola; Maniola jurtina; United Kingdom; GenBank; -; MN139972  
 Lepidoptera; Nymphalidae; Coenonympha; Coenonympha oedippus; Austria; GenBank; -; MN139986  
 Lepidoptera; Lycaenidae; Polyommatus; Polyommatus icarus; Italy; GenBank; -; MN139987  
 Lepidoptera; Nymphalidae; Lasiommata; Lasiommata megera; France; GenBank; -; MN140053  
 Lepidoptera; Hesperidae; Thymelicus; Thymelicus lineola; Italy; GenBank; -; MN140070  
 Lepidoptera; Lycaenidae; Satyrium; Satyrium ilicis; Italy; GenBank; -; MN140082  
 Lepidoptera; Papilionidae; Papilio; Papilio machaon; Italy; GenBank; -; MN140087  
 Lepidoptera; Pieridae; Leptidea; Leptidea sinapis; Italy; GenBank; -; MN140088  
 Lepidoptera; Lycaenidae; Celastrina; Celastrina argiolus; Italy; GenBank; -; MN140125  
 Lepidoptera; Hesperidae; Carcharodus; Carcharodus alceae; Italy; GenBank; -; MN140145  
 Lepidoptera; Lycaenidae; Polyommatus; Polyommatus icarus; Ireland; GenBank; -; MN140154  
 Lepidoptera; Pieridae; Gonepteryx; Gonepteryx cleopatra; Italy; GenBank; -; MN140156  
 Lepidoptera; Nymphalidae; Vanessa; Vanessa cardui; Italy; GenBank; -; MN140202  
 Lepidoptera; Pieridae; Pieris; Pieris mannii; Italy; GenBank; -; MN140223  
 Lepidoptera; Pieridae; Pieris; Pieris napi; United Kingdom; GenBank; -; MN140241  
 Lepidoptera; Nymphalidae; Lasiommata; Lasiommata paramegaera; Italy; GenBank; -; MN140247  
 Lepidoptera; Nymphalidae; Lasiommata; Lasiommata megera; Italy; GenBank; -; MN140255  
 Lepidoptera; Nymphalidae; Arethusana; Arethusana arethusia; Slovenia; GenBank; -; MN140311  
 Lepidoptera; Lycaenidae; Polyommatus; Polyommatus icarus; Italy; GenBank; -; MN140344  
 Lepidoptera; Lycaenidae; Celastrina; Celastrina argiolus; Italy; GenBank; -; MN140351  
 Lepidoptera; Lycaenidae; Aricia; Aricia cramera; Italy; GenBank; -; MN140353  
 Lepidoptera; Nymphalidae; Aphantopus; Aphantopus hyperantus; United Kingdom; Bold; OXB278-15; MN140418  
 Lepidoptera; Nymphalidae; Vanessa; Vanessa cardui; France; GenBank; -; MN140444  
 Lepidoptera; Nymphalidae; Euphydryas; Euphydryas aurinia; United Kingdom; GenBank; -; MN140450  
 Lepidoptera; Pieridae; Pieris; Pieris napi; United Kingdom; GenBank; -; MN140454  
 Lepidoptera; Nymphalidae; Melitaea; Melitaea aetherie; Italy; GenBank; -; MN140458  
 Lepidoptera; Lycaenidae; Lampides; Lampides boeticus; Italy; GenBank; -; MN140469  
 Lepidoptera; Nymphalidae; Maniola; Maniola jurtina; United Kingdom; GenBank; -; MN140470  
 Lepidoptera; Nymphalidae; Hipparchia; Hipparchia aristaeus; Italy; GenBank; -; MN140494  
 Lepidoptera; Papilionidae; Papilio; Papilio machaon; Italy; GenBank; -; MN140511  
 Lepidoptera; Pieridae; Pieris; Pieris napi; United Kingdom; GenBank; -; MN140526  
 Lepidoptera; Pieridae; Gonepteryx; Gonepteryx cleopatra; Italy; GenBank; -; MN140546  
 Lepidoptera; Nymphalidae; Maniola; Maniola jurtina; United Kingdom; GenBank; -; MN140554  
 Lepidoptera; Pieridae; Pieris; Pieris napi; United Kingdom; GenBank; -; MN140561  
 Lepidoptera; Pieridae; Pieris; Pieris napi; United Kingdom; GenBank; -; MN140592  
 Lepidoptera; Lycaenidae; Polyommatus; Polyommatus icarus; United Kingdom; GenBank; -; MN140599  
 Lepidoptera; Hesperidae; Gegendes; Gegendes pumilio; Italy; GenBank; -; MN140616  
 Lepidoptera; Lycaenidae; Polyommatus; Polyommatus icarus; Italy; GenBank; -; MN140633  
 Lepidoptera; Pieridae; Gonepteryx; Gonepteryx cleopatra; France; GenBank; -; MN140645  
 Lepidoptera; Lycaenidae; Callophrys; Callophrys rubi; Italy; GenBank; -; MN140677  
 Lepidoptera; Nymphalidae; Vanessa; Vanessa cardui; Italy; GenBank; -; MN140696  
 Lepidoptera; Nymphalidae; Maniola; Maniola jurtina; United Kingdom; GenBank; -; MN140700

Lepidoptera ; Pieridae; Gonepteryx; Gonepteryx rhamni; Italy; GenBank; -; MN140755  
 Lepidoptera ; Hesperidae; Gegeres; Gegeres pumilio; Italy; GenBank; -; MN140782  
 Lepidoptera; Nymphalidae; Erebia; Erebia montana; Italy; GenBank; -; MN140801  
 Lepidoptera; Nymphalidae; Maniola; Maniola jurtina; United Kingdom; GenBank; -; MN140891  
 Lepidoptera; Lycaenidae; Polyommatus; Polyommatus icarus; United Kingdom; GenBank; -; MN140897  
 Lepidoptera; Nymphalidae; Hipparchia; Hipparchia leighebi; Italy; GenBank; -; MN140898  
 Lepidoptera; Nymphalidae; Maniola; Maniola jurtina; United Kingdom; GenBank; -; MN140914  
 Lepidoptera; Lycaenidae; Plebejus; Plebejus argus; United Kingdom; GenBank; -; MN140942  
 Lepidoptera; Papilionidae; Papilio; Papilio machaon; Italy; GenBank; -; MN140953  
 Lepidoptera; Nymphalidae; Lasiommata; Lasiommata megera; Italy; GenBank; -; MN140977  
 Lepidoptera; Nymphalidae; Hipparchia; Hipparchia statilinus; Italy; GenBank; -; MN140993  
 Lepidoptera; Nymphalidae; Hipparchia; Hipparchia leighebi; Italy; GenBank; -; MN141016  
 Lepidoptera; Nymphalidae; Maniola; Maniola jurtina; United Kingdom; GenBank; -; MN141021  
 Lepidoptera; Nymphalidae; Aglais; Aglais urticae; France; Bold; OXB1343-15; MN141027  
 Lepidoptera ; Pieridae; Gonepteryx; Gonepteryx cleopatra; Italy; GenBank; -; MN141085  
 Lepidoptera; Nymphalidae; Maniola; Maniola jurtina; France; GenBank; -; MN141125  
 Lepidoptera; Pieridae; Euchloe; Euchloe ausonia; Italy; GenBank; -; MN141144  
 Lepidoptera; Pieridae; Leptidea; Leptidea reali; Italy; GenBank; -; MN141160  
 Lepidoptera ; Lycaenidae; Lampides; Lampides boeticus; Italy; GenBank; -; MN141170  
 Lepidoptera; Nymphalidae; Maniola; Maniola jurtina; United Kingdom; GenBank; -; MN141188  
 Lepidoptera; Pieridae; Euchloe; Euchloe insularis; Italy; GenBank; -; MN141190  
 Lepidoptera; Pieridae; Euchloe; Euchloe ausonia; Italy; GenBank; -; MN141201  
 Lepidoptera; Pieridae; Pieris; Pieris brassicae; France; GenBank; -; MN141206  
 Lepidoptera ; Hesperidae; Carcharodus; Carcharodus alceae; France; GenBank; -; MN141216  
 Lepidoptera; Nymphalidae; Lasiommata; Lasiommata megera; Italy; GenBank; -; MN141272  
 Lepidoptera; Pieridae; Pontia; Pieris edusa; Italy; GenBank; -; MN141278  
 Lepidoptera; Nymphalidae; Maniola; Maniola jurtina; United Kingdom; GenBank; -; MN141284  
 Lepidoptera; Lycaenidae; Polyommatus; Polyommatus icarus; United Kingdom; GenBank; -; MN141288  
 Lepidoptera; Pieridae; Pieris; Pieris rapae; United Kingdom; GenBank; -; MN141416  
 Lepidoptera; Nymphalidae; Coenonympha; Coenonympha oedippus; Austria; GenBank; -; MN141430  
 Lepidoptera; Nymphalidae; Melitaea; Melitaea cinxia; France; GenBank; -; MN141462  
 Lepidoptera; Lycaenidae; Callophrys; Callophrys rubi; Italy; GenBank; -; MN141469  
 Lepidoptera; Papilionidae; Papilio; Papilio machaon; Italy; GenBank; -; MN141479  
 Lepidoptera; Nymphalidae; Maniola; Maniola jurtina; United Kingdom; GenBank; -; MN141496  
 Lepidoptera; Nymphalidae; Hipparchia; Hipparchia aristaeus; Italy; GenBank; -; MN141498  
 Lepidoptera; Nymphalidae; Maniola; Maniola jurtina; United Kingdom; GenBank; -; MN141511  
 Lepidoptera; Nymphalidae; Maniola; Maniola jurtina; United Kingdom; GenBank; -; MN141524  
 Lepidoptera ; Pieridae; Gonepteryx; Gonepteryx cleopatra; Italy; GenBank; -; MN141556  
 Lepidoptera; Nymphalidae; Euphydryas; Euphydryas aurinia; United Kingdom; GenBank; -; MN141558  
 Lepidoptera; Lycaenidae; Polyommatus; Polyommatus icarus; Italy; GenBank; -; MN141565  
 Lepidoptera; Lycaenidae; Agriades; Albulina optilete; Sweden; GenBank; -; MN141586  
 Lepidoptera; Nymphalidae; Lasiommata; Lasiommata paramegaera; Italy; GenBank; -; MN141597  
 Lepidoptera; Pieridae; Pontia; Pieris daplidice; Italy; GenBank; -; MN141621  
 Lepidoptera; Hesperidae; Pyrgus; Pyrgus malvoides; Italy; GenBank; -; MN141639  
 Lepidoptera; Nymphalidae; Vanessa; Vanessa atalanta; France; GenBank; -; MN141664  
 Lepidoptera; Nymphalidae; Coenonympha; Coenonympha corinna; Italy; GenBank; -; MN141687  
 Lepidoptera; Pieridae; Pontia; Pieris daplidice; Italy; GenBank; -; MN141705  
 Lepidoptera; Lycaenidae; Lycaena; Lycaena tityrus; France; GenBank; -; MN141707  
 Lepidoptera; Nymphalidae; Maniola; Maniola jurtina; France; GenBank; -; MN141721  
 Lepidoptera; Pieridae; Pieris; Pieris mannii; Italy; GenBank; -; MN141754  
 Lepidoptera; Nymphalidae; Maniola; Maniola jurtina; United Kingdom; GenBank; -; MN141769  
 Lepidoptera; Pieridae; Pieris; Pieris brassicae; United Kingdom; GenBank; -; MN141782  
 Lepidoptera; Pieridae; Pieris; Pieris mannii; Italy; GenBank; -; MN141791  
 Lepidoptera; Lycaenidae; Lycaena; Lycaena phlaeas; Italy; GenBank; -; MN141811  
 Lepidoptera; Nymphalidae; Coenonympha; Coenonympha corinna; Italy; GenBank; -; MN141812  
 Lepidoptera; Nymphalidae; Maniola; Maniola jurtina; United Kingdom; GenBank; -; MN141815  
 Lepidoptera; Nymphalidae; Maniola; Maniola jurtina; United Kingdom; GenBank; -; MN141819  
 Lepidoptera; Nymphalidae; Maniola; Maniola jurtina; United Kingdom; GenBank; -; MN141838  
 Lepidoptera; Nymphalidae; Charaxes; Charaxes jasius; France; GenBank; -; MN141889  
 Lepidoptera; Pieridae; Pieris; Pieris mannii; Italy; GenBank; -; MN141900  
 Lepidoptera; Pieridae; Pieris; Pieris brassicae; Italy; GenBank; -; MN141944  
 Lepidoptera; Nymphalidae; Coenonympha; Coenonympha pamphilus; Italy; GenBank; -; MN141978  
 Lepidoptera; Nymphalidae; Vanessa; Vanessa atalanta; Italy; GenBank; -; MN141980  
 Lepidoptera; Nymphalidae; Vanessa; Vanessa atalanta; Italy; GenBank; -; MN142007  
 Lepidoptera; Nymphalidae; Vanessa; Vanessa cardui; Italy; GenBank; -; MN142014  
 Lepidoptera; Nymphalidae; Vanessa; Vanessa atalanta; Italy; GenBank; -; MN142042  
 Lepidoptera; Nymphalidae; Maniola; Maniola jurtina; United Kingdom; GenBank; -; MN142044  
 Lepidoptera; Nymphalidae; Maniola; Maniola jurtina; United Kingdom; GenBank; -; MN142046  
 Lepidoptera ; Lycaenidae; Lampides; Lampides boeticus; France; GenBank; -; MN142086  
 Lepidoptera; Nymphalidae; Boloria; Boloria selene; United Kingdom; GenBank; -; MN142093  
 Lepidoptera; Lycaenidae; Polyommatus; Polyommatus icarus; France; GenBank; -; MN142118  
 Lepidoptera; Lycaenidae; Polyommatus; Polyommatus icarus; Italy; GenBank; -; MN142148  
 Lepidoptera; Lycaenidae; Aricia; Aricia allous; United Kingdom; GenBank; -; MN142161  
 Lepidoptera; Nymphalidae; Maniola; Maniola jurtina; United Kingdom; GenBank; -; MN142168  
 Lepidoptera ; Lycaenidae; Lampides; Lampides boeticus; Italy; GenBank; -; MN142211  
 Lepidoptera; Nymphalidae; Maniola; Maniola jurtina; United Kingdom; GenBank; -; MN142213  
 Lepidoptera ; Hesperidae; Gegeres; Gegeres pumilio; Italy; GenBank; -; MN142214  
 Lepidoptera; Nymphalidae; Vanessa; Vanessa cardui; Italy; GenBank; -; MN142221

Lepidoptera; Pieridae; Pieris; Pieris rapae; Italy; GenBank; -; MN142249  
 Lepidoptera; Pieridae; Pieris; Pieris rapae; Italy; GenBank; -; MN142252  
 Lepidoptera; Lycaenidae; Celastrina; Celastrina argiolus; Italy; GenBank; -; MN142255  
 Lepidoptera; Hesperidae; Carcharodus; Carcharodus alceae; France; GenBank; -; MN142277  
 Lepidoptera; Pieridae; Gonepteryx; Gonepteryx cleopatra; Italy; GenBank; -; MN142295  
 Lepidoptera; Lycaenidae; Glaucopsyche; Glaucopsyche melanops; Italy; GenBank; -; MN142304  
 Lepidoptera; Lycaenidae; Maniola; Maniola jurtina; United Kingdom; GenBank; -; MN142312  
 Lepidoptera; Nymphalidae; Maniola; Maniola jurtina; United Kingdom; GenBank; -; MN142319  
 Lepidoptera; Hesperidae; Carcharodus; Carcharodus alceae; Italy; GenBank; -; MN142326  
 Lepidoptera; Pieridae; Pieris; Pieris napi; United Kingdom; GenBank; -; MN142332  
 Lepidoptera; Nymphalidae; Maniola; Maniola jurtina; United Kingdom; GenBank; -; MN142343  
 Lepidoptera; Lycaenidae; Polyommatus; Polyommatus icarus; United Kingdom; GenBank; -; MN142379  
 Lepidoptera; Nymphalidae; Maniola; Maniola jurtina; United Kingdom; GenBank; -; MN142391  
 Lepidoptera; Pieridae; Pieris; Pieris napi; United Kingdom; GenBank; -; MN142404  
 Lepidoptera; Lycaenidae; Polyommatus; Polyommatus icarus; Italy; GenBank; -; MN142455  
 Lepidoptera; Nymphalidae; Hipparchia; Hipparchia neapolitana; Italy; GenBank; -; MN142472  
 Lepidoptera; Pieridae; Gonepteryx; Gonepteryx rhamni; United Kingdom; GenBank; -; MN142478  
 Lepidoptera; Nymphalidae; Maniola; Maniola jurtina; United Kingdom; GenBank; -; MN142491  
 Lepidoptera; Nymphalidae; Maniola; Maniola jurtina; United Kingdom; GenBank; -; MN142619  
 Lepidoptera; Nymphalidae; Lasiommata; Lasiommata megera; Italy; GenBank; -; MN142648  
 Lepidoptera; Lycaenidae; Polyommatus; Polyommatus icarus; United Kingdom; GenBank; -; MN142654  
 Lepidoptera; Nymphalidae; Maniola; Maniola jurtina; United Kingdom; GenBank; -; MN142656  
 Lepidoptera; Lycaenidae; Lampides; Lampides boeticus; Italy; GenBank; -; MN142667  
 Lepidoptera; Pieridae; Pieris; Pieris napi; United Kingdom; GenBank; -; MN142675  
 Lepidoptera; Nymphalidae; Pyronia; Pyronia cecilia; Italy; Bold; WMB3034-14; MN142734  
 Lepidoptera; Nymphalidae; Lasiommata; Lasiommata megera; Italy; GenBank; -; MN142745  
 Lepidoptera; Nymphalidae; Melitaea; Melitaea nevadensis; Italy; GenBank; -; MN142752  
 Lepidoptera; Pieridae; Pieris; Pieris rapae; France; GenBank; -; MN142773  
 Lepidoptera; Nymphalidae; Lasiommata; Lasiommata megera; France; GenBank; -; MN142784  
 Lepidoptera; Nymphalidae; Lasiommata; Lasiommata megera; Italy; GenBank; -; MN142821  
 Lepidoptera; Lycaenidae; Polyommatus; Polyommatus icarus; United Kingdom; GenBank; -; MN142826  
 Lepidoptera; Nymphalidae; Vanessa; Vanessa cardui; Italy; GenBank; -; MN142853  
 Lepidoptera; Nymphalidae; Pyronia; Pyronia cecilia; Italy; Bold; WMB1551-13; MN142855  
 Lepidoptera; Papilionidae; Papilio; Papilio machaon; France; GenBank; -; MN142863  
 Lepidoptera; Lycaenidae; Lampides; Lampides boeticus; Italy; GenBank; -; MN142889  
 Lepidoptera; Pieridae; Pieris; Pieris napi; United Kingdom; GenBank; -; MN142901  
 Lepidoptera; Lycaenidae; Polyommatus; Polyommatus icarus; United Kingdom; GenBank; -; MN142936  
 Lepidoptera; Hesperidae; Thymelicus; Thymelicus acteon; Italy; GenBank; -; MN142948  
 Lepidoptera; Pieridae; Pieris; Pieris rapae; Italy; GenBank; -; MN142949  
 Lepidoptera; Nymphalidae; Maniola; Maniola jurtina; United Kingdom; GenBank; -; MN142962  
 Lepidoptera; Pieridae; Pieris; Pieris rapae; Italy; GenBank; -; MN142967  
 Lepidoptera; Nymphalidae; Maniola; Maniola jurtina; United Kingdom; GenBank; -; MN142974  
 Lepidoptera; Nymphalidae; Coenonympha; Coenonympha dorus; Italy; GenBank; -; MN143002  
 Lepidoptera; Nymphalidae; Hipparchia; Hipparchia leighebi; Italy; GenBank; -; MN143025  
 Lepidoptera; Nymphalidae; Maniola; Maniola jurtina; United Kingdom; GenBank; -; MN143032  
 Lepidoptera; Nymphalidae; Lasiommata; Lasiommata megera; Italy; GenBank; -; MN143033  
 Lepidoptera; Lycaenidae; Polyommatus; Polyommatus icarus; United Kingdom; GenBank; -; MN143042  
 Lepidoptera; Hesperidae; Carcharodus; Carcharodus alceae; Italy; GenBank; -; MN143051  
 Lepidoptera; Pieridae; Pieris; Pieris brassicae; Italy; GenBank; -; MN143059  
 Lepidoptera; Pieridae; Leptidea; Leptidea reali; Italy; GenBank; -; MN143076  
 Lepidoptera; Nymphalidae; Maniola; Maniola jurtina; United Kingdom; GenBank; -; MN143079  
 Lepidoptera; Hesperidae; Thymelicus; Thymelicus acteon; United Kingdom; GenBank; -; MN143095  
 Lepidoptera; Lycaenidae; Polyommatus; Polyommatus icarus; United Kingdom; GenBank; -; MN143102  
 Lepidoptera; Lycaenidae; Polyommatus; Polyommatus icarus; Italy; GenBank; -; MN143107  
 Lepidoptera; Nymphalidae; Erebia; Erebia mnestra; Austria; GenBank; -; MN143144  
 Lepidoptera; Lycaenidae; Cupido; Cupido minimus; United Kingdom; GenBank; -; MN143152  
 Lepidoptera; Nymphalidae; Hipparchia; Hipparchia leighebi; Italy; GenBank; -; MN143170  
 Lepidoptera; Nymphalidae; Maniola; Maniola jurtina; United Kingdom; GenBank; -; MN143174  
 Lepidoptera; Nymphalidae; Lasiommata; Lasiommata paramegaera; Italy; GenBank; -; MN143193  
 Lepidoptera; Nymphalidae; Pyronia; Pyronia cecilia; Italy; Bold; WMB2823-13; MN143221  
 Lepidoptera; Hesperidae; Thymelicus; Thymelicus acteon; Italy; GenBank; -; MN143251  
 Lepidoptera; Papilionidae; Papilio; Papilio machaon; Italy; GenBank; -; MN143257  
 Lepidoptera; Pieridae; Pieris; Pieris mannii; Italy; GenBank; -; MN143263  
 Lepidoptera; Nymphalidae; Pyronia; Pyronia cecilia; Italy; Bold; WMB911-13; MN143302  
 Lepidoptera; Nymphalidae; Hipparchia; Hipparchia semele; United Kingdom; GenBank; -; MN143307  
 Lepidoptera; Pieridae; Pieris; Pieris mannii; Italy; GenBank; -; MN143331  
 Lepidoptera; Pieridae; Pieris; Pieris rapae; Italy; GenBank; -; MN143343  
 Lepidoptera; Lycaenidae; Leptotes; Leptotes pirithous; Italy; GenBank; -; MN143373  
 Lepidoptera; Pieridae; Euphloe; Euphloe ausonia; Italy; GenBank; -; MN143388  
 Lepidoptera; Lycaenidae; Lampides; Lampides boeticus; France; GenBank; -; MN143409  
 Lepidoptera; Nymphalidae; Hipparchia; Hipparchia fagi; Italy; GenBank; -; MN143411  
 Lepidoptera; Pieridae; Leptidea; Leptidea sinapis; Slovenia; GenBank; -; MN143420  
 Lepidoptera; Nymphalidae; Hipparchia; Hipparchia fagi; Italy; GenBank; -; MN143432  
 Lepidoptera; Lycaenidae; Polyommatus; Polyommatus icarus; Italy; GenBank; -; MN143452  
 Lepidoptera; Nymphalidae; Maniola; Maniola jurtina; United Kingdom; GenBank; -; MN143494  
 Lepidoptera; Lycaenidae; Polyommatus; Polyommatus icarus; United Kingdom; GenBank; -; MN143538  
 Lepidoptera; Nymphalidae; Lasiommata; Lasiommata megera; France; GenBank; -; MN143547  
 Lepidoptera; Hesperidae; Ochloides; Ochloides sylvanus; Italy; GenBank; -; MN143550

Lepidoptera;Nymphalidae;Lasiommata;Lasiommata megera;Italy;GenBank;-;MN143554  
 Lepidoptera;Nymphalidae;Coenonympha;Coenonympha corinna;Italy;GenBank;-;MN143566  
 Lepidoptera;Pieridae;Leptidea;Leptidea reali;Italy;GenBank;-;MN143589  
 Lepidoptera;Lycaenidae;Polyommatus;Polyommatus icarus;United Kingdom;GenBank;-;MN143601  
 Lepidoptera;Pieridae;Pontia;Pieris daphnoides;Italy;GenBank;-;MN143616  
 Lepidoptera;Nymphalidae;Lasiommata;Lasiommata paramegastor;Italy;GenBank;-;MN143629  
 Lepidoptera;Nymphalidae;Maniola;Maniola jurtina;United Kingdom;GenBank;-;MN143666  
 Lepidoptera;Nymphalidae;Lasiommata;Lasiommata paramegastor;Italy;GenBank;-;MN143678  
 Lepidoptera;Nymphalidae;Issoria;Issoria lathonia;Italy;GenBank;-;MN143704  
 Lepidoptera;Nymphalidae;Erebia;Erebia mnestora;Austria;GenBank;-;MN143707  
 Lepidoptera;Hesperiidae;Carcharodus;Carcharodus alceae;Austria;GenBank;-;MN143736  
 Lepidoptera;Nymphalidae;Maniola;Maniola jurtina;United Kingdom;GenBank;-;MN143757  
 Lepidoptera;Pieridae;Pieris;Pieris rapae;Italy;GenBank;-;MN143758  
 Lepidoptera;Nymphalidae;Coenonympha;Coenonympha corinna;Italy;GenBank;-;MN143776  
 Lepidoptera;Nymphalidae;Maniola;Maniola jurtina;United Kingdom;GenBank;-;MN143796  
 Lepidoptera;Pieridae;Pieris;Pieris rapae;Italy;GenBank;-;MN143823  
 Lepidoptera;Nymphalidae;Erebia;Erebia aethiops;United Kingdom;GenBank;-;MN143838  
 Lepidoptera;Lycaenidae;Leptotes;Leptotes pirithous;France;GenBank;-;MN143866  
 Lepidoptera;Pieridae;Gonepteryx;Gonepteryx cleopatra;Italy;GenBank;-;MN143883  
 Lepidoptera;Lycaenidae;Lampides;Lampides boeticus;Portugal;GenBank;-;MN143892  
 Lepidoptera;Nymphalidae;Hipparchia;Hipparchia statilinus;Italy;GenBank;-;MN143906  
 Lepidoptera;Pieridae;Pieris;Pieris napi;United Kingdom;GenBank;-;MN143928  
 Lepidoptera;Lycaenidae;Lampides;Lampides boeticus;Italy;GenBank;-;MN143967  
 Lepidoptera;Lycaenidae;Polyommatus;Polyommatus icarus;Italy;GenBank;-;MN143970  
 Lepidoptera;Hesperiidae;Thymelicus;Thymelicus acteon;United Kingdom;GenBank;-;MN143979  
 Lepidoptera;Nymphalidae;Maniola;Maniola jurtina;United Kingdom;GenBank;-;MN143989  
 Lepidoptera;Pieridae;Leptidea;Leptidea reali;Italy;GenBank;-;MN143990  
 Lepidoptera;Pieridae;Pieris;Pieris rapae;Italy;GenBank;-;MN143992  
 Lepidoptera;Nymphalidae;Lasiommata;Lasiommata megera;Italy;GenBank;-;MN143997  
 Lepidoptera;Nymphalidae;Melanargia;Melanargia galathea;United Kingdom;GenBank;-;MN144012  
 Lepidoptera;Nymphalidae;Lasiommata;Lasiommata megera;Italy;GenBank;-;MN144013  
 Lepidoptera;Papilionidae;Papilio;Papilio machaon;Italy;GenBank;-;MN144041  
 Lepidoptera;Nymphalidae;Melitaea;Melitaea nevadensis;Italy;GenBank;-;MN144053  
 Lepidoptera;Pieridae;Euchloe;Euchloe insularis;Italy;GenBank;-;MN144070  
 Lepidoptera;Lycaenidae;Aricia;Aricia agestis;Italy;GenBank;-;MN144078  
 Lepidoptera;Lycaenidae;Polyommatus;Polyommatus icarus;United Kingdom;GenBank;-;MN144093  
 Lepidoptera;Lycaenidae;Polyommatus;Polyommatus icarus;United Kingdom;GenBank;-;MN144095  
 Lepidoptera;Pieridae;Leptidea;Leptidea sinapis;Italy;GenBank;-;MN144105  
 Lepidoptera;Pieridae;Euchloe;Euchloe insularis;Italy;GenBank;-;MN144108  
 Lepidoptera;Lycaenidae;Celastrina;Celastrina argiolus;Italy;GenBank;-;MN144129  
 Lepidoptera;Hesperiidae;Thymelicus;Thymelicus acteon;Italy;GenBank;-;MN144138  
 Lepidoptera;Lycaenidae;Polyommatus;Polyommatus icarus;United Kingdom;GenBank;-;MN144141  
 Lepidoptera;Nymphalidae;Maniola;Maniola jurtina;United Kingdom;GenBank;-;MN144164  
 Lepidoptera;Nymphalidae;Hipparchia;Hipparchia semele;United Kingdom;GenBank;-;MN144166  
 Lepidoptera;Nymphalidae;Hipparchia;Hipparchia leighebi;Italy;GenBank;-;MN144175  
 Lepidoptera;Nymphalidae;Maniola;Maniola jurtina;United Kingdom;GenBank;-;MN144188  
 Lepidoptera;Hesperiidae;Thymelicus;Thymelicus acteon;Italy;GenBank;-;MN144206  
 Lepidoptera;Nymphalidae;Melitaea;Melitaea didyma;Italy;GenBank;-;MN144220  
 Lepidoptera;Nymphalidae;Hipparchia;Hipparchia leighebi;Italy;GenBank;-;MN144251  
 Lepidoptera;Lycaenidae;Plebejus;Plebejus argus;United Kingdom;GenBank;-;MN144252  
 Lepidoptera;Nymphalidae;Lasiommata;Lasiommata megera;Italy;GenBank;-;MN144258  
 Lepidoptera;Nymphalidae;Lasiommata;Lasiommata megera;Sweden;GenBank;-;MN144260  
 Lepidoptera;Pieridae;Gonepteryx;Gonepteryx cleopatra;Italy;GenBank;-;MN144285  
 Lepidoptera;Hesperiidae;Gegenes;Gegenes nostrodamus;Italy;GenBank;-;MN144291  
 Lepidoptera;Nymphalidae;Hipparchia;Hipparchia semele;United Kingdom;GenBank;-;MN144294  
 Lepidoptera;Pieridae;Aporia;Aporia crataegi;Italy;GenBank;-;MN144305  
 Lepidoptera;Nymphalidae;Maniola;Maniola jurtina;United Kingdom;GenBank;-;MN144310  
 Lepidoptera;Lycaenidae;Polyommatus;Polyommatus icarus;United Kingdom;GenBank;-;MN144322  
 Lepidoptera;Hesperiidae;Carcharodus;Carcharodus baeticus;Italy;Bold;EULEP5527-17;MN144356  
 Lepidoptera;Lycaenidae;Polyommatus;Polyommatus icarus;United Kingdom;GenBank;-;MN144398  
 Lepidoptera;Pieridae;Pieris;Pieris mannii;Italy;GenBank;-;MN144408  
 Lepidoptera;Nymphalidae;Brintesia;Kanetisa circe;France;GenBank;-;MN144413  
 Lepidoptera;Nymphalidae;Vanessa;Vanessa cardui;Italy;GenBank;-;MN144429  
 Lepidoptera;Nymphalidae;Maniola;Maniola jurtina;United Kingdom;GenBank;-;MN144437  
 Lepidoptera;Nymphalidae;Coenonympha;Coenonympha corinna;Italy;GenBank;-;MN144470  
 Lepidoptera;Hesperiidae;Gegenes;Gegenes pumilio;Italy;GenBank;-;MN144503  
 Lepidoptera;Nymphalidae;Maniola;Maniola jurtina;United Kingdom;GenBank;-;MN144628  
 Lepidoptera;Nymphalidae;Maniola;Maniola jurtina;United Kingdom;GenBank;-;MN144630  
 Lepidoptera;Pieridae;Pieris;Pieris brassicae;Italy;GenBank;-;MN144663  
 Lepidoptera;Hesperiidae;Ochlodes;Ochlodes sylvanus;France;GenBank;-;MN144667  
 Lepidoptera;Hesperiidae;Gegenes;Gegenes pumilio;Italy;GenBank;-;MN144675  
 Lepidoptera;Lycaenidae;Lycaena;Lycaena tityrus;Italy;GenBank;-;MN144700  
 Lepidoptera;Nymphalidae;Lasiommata;Lasiommata megera;Italy;GenBank;-;MN144715  
 Lepidoptera;Lycaenidae;Polyommatus;Polyommatus icarus;United Kingdom;GenBank;-;MN144720  
 Lepidoptera;Papilionidae;Papilio;Papilio machaon;Italy;GenBank;-;MN144727  
 Lepidoptera;Hesperiidae;Thymelicus;Thymelicus sylvestris;Germany;GenBank;-;MN144747  
 Lepidoptera;Nymphalidae;Maniola;Maniola jurtina;United Kingdom;GenBank;-;MN144780  
 Lepidoptera;Nymphalidae;Maniola;Maniola jurtina;United Kingdom;GenBank;-;MN144797

Lepidoptera;Nymphalidae;Melanargia;Melanargia occitanica;Italy;GenBank;-;MN144812  
 Lepidoptera;Nymphalidae;Maniola;Maniola jurtina;United Kingdom;GenBank;-;MN144820  
 Lepidoptera;Lycaenidae;Lampides;Lampides boeticus;Italy;GenBank;-;MN144854  
 Lepidoptera;Nymphalidae;Coenonympha;Coenonympha corinna;Italy;GenBank;-;MN144861  
 Lepidoptera;Lycaenidae;Polyommatus;Polyommatus icarus;United Kingdom;GenBank;-;MN144884  
 Lepidoptera;Nymphalidae;Pyronia;Pyronia cecilia;Italy;Bold;WMB2822-13;MN144885  
 Lepidoptera;Pieridae;Pieris;Pieris napi;United Kingdom;GenBank;-;MN144887  
 Lepidoptera;Nymphalidae;Lasiommata;Lasiommata megera;Italy;GenBank;-;MN144946  
 Lepidoptera;Nymphalidae;Lasiommata;Lasiommata megera;Italy;GenBank;-;MN144997  
 Lepidoptera;Nymphalidae;Vanessa;Vanessa atalanta;Italy;GenBank;-;MN144998  
 Lepidoptera;Nymphalidae;Pyronia;Pyronia cecilia;Italy;Bold;WMB1546-13;MN145003  
 Lepidoptera;Nymphalidae;Pyronia;Pyronia cecilia;Italy;Bold;WMB3033-14;MN145004  
 Lepidoptera;Nymphalidae;Coenonympha;Coenonympha corinna;Italy;GenBank;-;MN145022  
 Lepidoptera;Lycaenidae;Callophrys;Callophrys rubi;Spain;GenBank;-;MN145080  
 Lepidoptera;Lycaenidae;Leptotes;Leptotes pirithous;France;GenBank;-;MN145084  
 Lepidoptera;Nymphalidae;Hipparchia;Hipparchia semele;United Kingdom;GenBank;-;MN145089  
 Lepidoptera;Nymphalidae;Pyronia;Pyronia tithonus;France;Bold;BIBSA1244-15;MN145103  
 Lepidoptera;Lycaenidae;Satyrium;Satyrium ilicis;France;GenBank;-;MN145111  
 Lepidoptera;Nymphalidae;Lasiommata;Lasiommata megera;France;GenBank;-;MN145125  
 Lepidoptera;Nymphalidae;Maniola;Maniola jurtina;United Kingdom;GenBank;-;MN145133  
 Lepidoptera;Nymphalidae;Pyronia;Pyronia cecilia;Italy;Bold;WMB4600-14;MN145135  
 Lepidoptera;Nymphalidae;Hipparchia;Hipparchia sbordonii;Italy;GenBank;-;MN145157  
 Lepidoptera;Lycaenidae;Polyommatus;Polyommatus icarus;United Kingdom;GenBank;-;MN145164  
 Lepidoptera;Hesperiidae;Thymelicus;Thymelicus acteon;Italy;GenBank;-;MN145177  
 Lepidoptera;Nymphalidae;Maniola;Maniola jurtina;United Kingdom;GenBank;-;MN145187  
 Lepidoptera;Nymphalidae;Vanessa;Vanessa cardui;Italy;GenBank;-;MN145198  
 Lepidoptera;Nymphalidae;Argynnis;Argynnis paphia;United Kingdom;GenBank;-;MN145209  
 Lepidoptera;Lycaenidae;Lycaena;Lycaena tityrus;Italy;GenBank;-;MN145214  
 Lepidoptera;Lycaenidae;Polyommatus;Polyommatus icarus;United Kingdom;GenBank;-;MN145225  
 Lepidoptera;Pieridae;Pieris;Pieris napi;United Kingdom;GenBank;-;MN145235  
 Lepidoptera;Pieridae;Pieris;Pieris napi;United Kingdom;GenBank;-;MN145237  
 Lepidoptera;Lycaenidae;Polyommatus;Polyommatus icarus;United Kingdom;GenBank;-;MN145255  
 Lepidoptera;Hesperiidae;Thymelicus;Thymelicus acteon;Italy;GenBank;-;MN145292  
 Lepidoptera;Lycaenidae;Polyommatus;Polyommatus icarus;United Kingdom;GenBank;-;MN145293  
 Lepidoptera;Pieridae;Pieris;Pieris brassicae;Italy;GenBank;-;MN145300  
 Lepidoptera;Lycaenidae;Aricia;Aricia agestis;France;GenBank;-;MN145302  
 Lepidoptera;Papilionidae;Papilio;Papilio machaon;Italy;GenBank;-;MN145307  
 Lepidoptera;Pieridae;Gonepteryx;Gonepteryx cleopatra;Italy;GenBank;-;MN145321  
 Lepidoptera;Pieridae;Pontia;Pieris edusa;Italy;GenBank;-;MN145325  
 Lepidoptera;Papilionidae;Papilio;Papilio machaon;Italy;GenBank;-;MN145339  
 Lepidoptera;Lycaenidae;Celastrina;Celastrina argiolus;France;GenBank;-;MN145342  
 Lepidoptera;Nymphalidae;Maniola;Maniola jurtina;United Kingdom;GenBank;-;MN145349  
 Lepidoptera;Pieridae;Leptidea;Leptidea sinapis;France;GenBank;-;MN145352  
 Lepidoptera;Nymphalidae;Maniola;Maniola jurtina;United Kingdom;GenBank;-;MN145357  
 Lepidoptera;Pieridae;Pieris;Pieris rapae;Italy;GenBank;-;MN145418  
 Lepidoptera;Nymphalidae;Hipparchia;Hipparchia leighebi;Italy;GenBank;-;MN145441  
 Lepidoptera;Lycaenidae;Glaucopsyche;Glaucopsyche alexis;Italy;GenBank;-;MN145448  
 Lepidoptera;Nymphalidae;Vanessa;Vanessa cardui;Italy;GenBank;-;MN145450  
 Lepidoptera;Pieridae;Pieris;Pieris brassicae;United Kingdom;GenBank;-;MN181609  
 Lepidoptera;Pieridae;Pieris;Pieris brassicae;United Kingdom;GenBank;-;MN181610  
 Lepidoptera;Pieridae;Pieris;Pieris brassicae;United Kingdom;GenBank;-;MN181611  
 Lepidoptera;Pieridae;Pieris;Pieris rapae;Finland;GenBank;-;MN181894  
 Lepidoptera;Pieridae;Pieris;Pieris rapae;Finland;GenBank;-;MN181895  
 Lepidoptera;Pieridae;Pieris;Pieris rapae;Finland;GenBank;-;MN181896  
 Lepidoptera;Pieridae;Pieris;Pieris rapae;Finland;GenBank;-;MN181898  
 Lepidoptera;Pieridae;Pieris;Pieris rapae;Finland;GenBank;-;MN182192  
 Lepidoptera;Pieridae;Pieris;Pieris rapae;Russia;GenBank;-;MN182195  
 Lepidoptera;Pieridae;Pieris;Pieris rapae;Russia;GenBank;-;MN182196  
 Lepidoptera;Pieridae;Pieris;Pieris rapae;Russia;GenBank;-;MN182197  
 Lepidoptera;Pieridae;Pieris;Pieris rapae;Spain;GenBank;-;MN182207  
 Lepidoptera;Pieridae;Pieris;Pieris rapae;Italy;GenBank;-;MN182219  
 Lepidoptera;Pieridae;Pieris;Pieris rapae;United Kingdom;GenBank;-;MN182295  
 Lepidoptera;Lycaenidae;Polyommatus;Polyommatus icarus;United Kingdom;GenBank;-;MT151338  
 Lepidoptera;Lycaenidae;Polyommatus;Polyommatus icarus;United Kingdom;GenBank;-;MT151339  
 Lepidoptera;Lycaenidae;Polyommatus;Polyommatus icarus;United Kingdom;GenBank;-;MT151340  
 Lepidoptera;Lycaenidae;Polyommatus;Polyommatus icarus;United Kingdom;GenBank;-;MT151341  
 Lepidoptera;Lycaenidae;Polyommatus;Polyommatus icarus;United Kingdom;GenBank;-;MT151342  
 Lepidoptera;Lycaenidae;Polyommatus;Polyommatus icarus;United Kingdom;GenBank;-;MT151343  
 Lepidoptera;Lycaenidae;Polyommatus;Polyommatus icarus;United Kingdom;GenBank;-;MT151344  
 Lepidoptera;Lycaenidae;Polyommatus;Polyommatus icarus;United Kingdom;GenBank;-;MT151345  
 Lepidoptera;Lycaenidae;Polyommatus;Polyommatus icarus;United Kingdom;GenBank;-;MT151347  
 Lepidoptera;Lycaenidae;Polyommatus;Polyommatus icarus;United Kingdom;GenBank;-;MT151348  
 Lepidoptera;Lycaenidae;Polyommatus;Polyommatus icarus;United Kingdom;GenBank;-;MT151349  
 Lepidoptera;Lycaenidae;Polyommatus;Polyommatus icarus;United Kingdom;GenBank;-;MT151350  
 Lepidoptera;Lycaenidae;Polyommatus;Polyommatus icarus;United Kingdom;GenBank;-;MT151351  
 Lepidoptera;Lycaenidae;Polyommatus;Polyommatus icarus;United Kingdom;GenBank;-;MT151354  
 Lepidoptera;Lycaenidae;Polyommatus;Polyommatus icarus;United Kingdom;GenBank;-;MT151355  
 Lepidoptera;Lycaenidae;Polyommatus;Polyommatus icarus;United Kingdom;GenBank;-;MT151356

Lepidoptera;Lycaenidae;Polyommatus;Polyommatus icarus;United Kingdom;GenBank;-;MT151361  
 Lepidoptera;Lycaenidae;Polyommatus;Polyommatus icarus;United Kingdom;GenBank;-;MT151362  
 Lepidoptera;Lycaenidae;Polyommatus;Polyommatus icarus;United Kingdom;GenBank;-;MT151363  
 Lepidoptera;Lycaenidae;Polyommatus;Polyommatus icarus;United Kingdom;GenBank;-;MT151364  
 Lepidoptera;Lycaenidae;Polyommatus;Polyommatus icarus;United Kingdom;GenBank;-;MT151365  
 Lepidoptera;Nymphalidae;Hyponephele;Hyponephele lupina;Russia;Bold;EULEP4925-16;MT260571  
 Lepidoptera;Nymphalidae;Lasiommata;Lasiommata megera;Greece;GenBank;-;MT260729  
 Lepidoptera;Nymphalidae;Lasiommata;Lasiommata maera;Sweden;GenBank;-;MT260735  
 Lepidoptera;Nymphalidae;Lasiommata;Lasiommata megera;Russia;GenBank;-;MT260741  
 Lepidoptera;Nymphalidae;Lasiommata;Lasiommata maera;Russia;GenBank;-;MT260760  
 Lepidoptera;Nymphalidae;Lasiommata;Lasiommata megera;Russia;GenBank;-;MT260782  
 Lepidoptera;Nymphalidae;Lasiommata;Lasiommata megera;Croatia;GenBank;-;MT260786  
 Lepidoptera;Nymphalidae;Lasiommata;Lasiommata megera;Croatia;GenBank;-;MT260799  
 Lepidoptera;Pieridae;Pontia;Pieris edusa;Denmark;GenBank;-;MT755954  
 Lepidoptera;Lycaenidae;Aricia;Aricia agestis;Greece;GenBank;-;MT883881  
 Lepidoptera;Lycaenidae;Aricia;Aricia agestis;Greece;GenBank;-;MT883882  
 Lepidoptera;Lycaenidae;Aricia;Aricia allous;Russia;GenBank;-;MT883901  
 Lepidoptera;Lycaenidae;Aricia;Aricia allous;Russia;GenBank;-;MT883921  
 Lepidoptera;Lycaenidae;Aricia;Aricia allous;Russia;GenBank;-;MT883930  
 Lepidoptera;Nymphalidae;Boloria;Boloria napaea;Sweden;GenBank;-;MT916606  
 Lepidoptera;Nymphalidae;Boloria;Boloria napaea;Sweden;GenBank;-;MT916607  
 Lepidoptera;Nymphalidae;Boloria;Boloria napaea;Sweden;GenBank;-;MT916615  
 Lepidoptera;Hesperiidae;Carterocephalus;Carterocephalus palaemon;Russia;GenBank;-;MW115573  
 Lepidoptera;Nymphalidae;Satyrus;Satyrus ferula;Russia;GenBank;-;MW378057  
 Lepidoptera;Nymphalidae;Satyrus;Satyrus ferula;Russia;GenBank;-;MW378062  
 Lepidoptera;Nymphalidae;Satyrus;Satyrus ferula;Russia;GenBank;-;MW378122  
 Lepidoptera;Lycaenidae;Iolana;Iolana iolas;Macedonia;GenBank;-;MW378130  
 Lepidoptera;Lycaenidae;Polyommatus;Polyommatus icarus;United Kingdom;GenBank;-;MW394241  
 Lepidoptera;Lycaenidae;Polyommatus;Polyommatus icarus;United Kingdom;GenBank;-;MW394242  
 Lepidoptera;Lycaenidae;Polyommatus;Polyommatus icarus;United Kingdom;GenBank;-;MW394243  
 Lepidoptera;Lycaenidae;Polyommatus;Polyommatus icarus;United Kingdom;GenBank;-;MW394244  
 Lepidoptera;Lycaenidae;Polyommatus;Polyommatus icarus;United Kingdom;GenBank;-;MW394259  
 Lepidoptera;Lycaenidae;Polyommatus;Polyommatus icarus;United Kingdom;GenBank;-;MW394273  
 Lepidoptera;Lycaenidae;Polyommatus;Polyommatus icarus;United Kingdom;GenBank;-;MW394274  
 Lepidoptera;Lycaenidae;Polyommatus;Polyommatus icarus;United Kingdom;GenBank;-;MW394275  
 Lepidoptera;Lycaenidae;Polyommatus;Polyommatus icarus;United Kingdom;GenBank;-;MW394276  
 Lepidoptera;Lycaenidae;Polyommatus;Polyommatus icarus;United Kingdom;GenBank;-;MW394277  
 Lepidoptera;Lycaenidae;Polyommatus;Polyommatus icarus;United Kingdom;GenBank;-;MW394278  
 Lepidoptera;Lycaenidae;Polyommatus;Polyommatus icarus;United Kingdom;GenBank;-;MW394279  
 Lepidoptera;Lycaenidae;Polyommatus;Polyommatus icarus;United Kingdom;GenBank;-;MW394280  
 Lepidoptera;Lycaenidae;Polyommatus;Polyommatus icarus;United Kingdom;GenBank;-;MW394281  
 Lepidoptera;Lycaenidae;Polyommatus;Polyommatus icarus;United Kingdom;GenBank;-;MW394282  
 Lepidoptera;Lycaenidae;Polyommatus;Polyommatus icarus;United Kingdom;GenBank;-;MW394283  
 Lepidoptera;Lycaenidae;Polyommatus;Polyommatus icarus;United Kingdom;GenBank;-;MW394297  
 Lepidoptera;Lycaenidae;Polyommatus;Polyommatus icarus;United Kingdom;GenBank;-;MW394298  
 Lepidoptera;Lycaenidae;Polyommatus;Polyommatus icarus;United Kingdom;GenBank;-;MW394299  
 Lepidoptera;Lycaenidae;Polyommatus;Polyommatus icarus;United Kingdom;GenBank;-;MW394300  
 Lepidoptera;Lycaenidae;Polyommatus;Polyommatus icarus;United Kingdom;GenBank;-;MW394301  
 Lepidoptera;Lycaenidae;Polyommatus;Polyommatus icarus;United Kingdom;GenBank;-;MW394302  
 Lepidoptera;Lycaenidae;Polyommatus;Polyommatus icarus;United Kingdom;GenBank;-;MW394316  
 Lepidoptera;Lycaenidae;Polyommatus;Polyommatus icarus;United Kingdom;GenBank;-;MW394317  
 Lepidoptera;Lycaenidae;Polyommatus;Polyommatus icarus;United Kingdom;GenBank;-;MW394318  
 Lepidoptera;Lycaenidae;Polyommatus;Polyommatus icarus;United Kingdom;GenBank;-;MW394319  
 Lepidoptera;Lycaenidae;Polyommatus;Polyommatus icarus;United Kingdom;GenBank;-;MW394320  
 Lepidoptera;Lycaenidae;Polyommatus;Polyommatus icarus;United Kingdom;GenBank;-;MW394321  
 Lepidoptera;Lycaenidae;Polyommatus;Polyommatus icarus;United Kingdom;GenBank;-;MW394322  
 Lepidoptera;Lycaenidae;Polyommatus;Polyommatus icarus;United Kingdom;GenBank;-;MW394323  
 Lepidoptera;Lycaenidae;Polyommatus;Polyommatus icarus;United Kingdom;GenBank;-;MW394324  
 Lepidoptera;Lycaenidae;Polyommatus;Polyommatus icarus;United Kingdom;GenBank;-;MW394325  
 Lepidoptera;Lycaenidae;Polyommatus;Polyommatus icarus;United Kingdom;GenBank;-;MW394326  
 Lepidoptera;Lycaenidae;Polyommatus;Polyommatus icarus;United Kingdom;GenBank;-;MW394327  
 Lepidoptera;Lycaenidae;Polyommatus;Polyommatus icarus;United Kingdom;GenBank;-;MW394328  
 Lepidoptera;Lycaenidae;Polyommatus;Polyommatus icarus;United Kingdom;GenBank;-;MW394329  
 Lepidoptera;Lycaenidae;Polyommatus;Polyommatus icarus;United Kingdom;GenBank;-;MW394330  
 Lepidoptera;Pieridae;Pieris;Pieris brassicae;Belarus;GenBank;-;MW498992  
 Lepidoptera;Pieridae;Leptidea;Leptidea juvernica;Russia;GenBank;-;MW498996  
 Lepidoptera;Pieridae;Gonepteryx;Gonepteryx rhamni;Belarus;GenBank;-;MW499009  
 Lepidoptera;Nymphalidae;Vanessa;Vanessa atalanta;Estonia;GenBank;-;MW499034  
 Lepidoptera;Lycaenidae;Lycaena;Lycaena hippothoe;Norway;GenBank;-;MW499072  
 Lepidoptera;Nymphalidae;Erebia;Erebia manto;Ukraine;GenBank;-;MW499121  
 Lepidoptera;Nymphalidae;Boloria;Boloria thore;Sweden;GenBank;-;MW499144  
 Lepidoptera;Nymphalidae;Maniola;Maniola jurtina;United Kingdom;GenBank;-;MW499308  
 Lepidoptera;Nymphalidae;Apatura;Apatura ilia;Belarus;GenBank;-;MW499340  
 Lepidoptera;Lycaenidae;Cyranis;Cyranis semiargus;Sweden;GenBank;-;MW499391  
 Lepidoptera;Hesperiidae;Ochlodes;Ochlodes sylvanus;Lithuania;GenBank;-;MW499424  
 Lepidoptera;Nymphalidae;Boloria;Boloria napaea;Sweden;GenBank;-;MW499545  
 Lepidoptera;Pieridae;Aporia;Aporia crataegi;Belarus;GenBank;-;MW499607  
 Lepidoptera;Pieridae;Pontia;Pieris edusa;Ukraine;GenBank;-;MW499628

Lepidoptera; Pieridae; Pieris; Pieris rapae; Italy; GenBank; -; MW499669  
 Lepidoptera; Nymphalidae; Coenonympha; Coenonympha pamphilus; Greece; GenBank; -; MW499715  
 Lepidoptera; Nymphalidae; Hipparchia; Hipparchia semele; United Kingdom; GenBank; -; MW499729  
 Lepidoptera; Pieridae; Leptidea; Leptidea juvernica; Russia; GenBank; -; MW499739  
 Lepidoptera; Lycaenidae; Phengaris; Maculinea teleius; Ukraine; GenBank; -; MW499743  
 Lepidoptera; Nymphalidae; Erebia; Erebia gorge; Macedonia; GenBank; -; MW499770  
 Lepidoptera; Nymphalidae; Argynnis; Argynnis paphia; Sweden; GenBank; -; MW499779  
 Lepidoptera; Nymphalidae; Hipparchia; Hipparchia semele; United Kingdom; GenBank; -; MW499799  
 Lepidoptera; Lycaenidae; Phengaris; Maculinea teleius; Switzerland; GenBank; -; MW499832  
 Lepidoptera; Nymphalidae; Erebia; Erebia mnestra; Switzerland; GenBank; -; MW499855  
 Lepidoptera; Nymphalidae; Neptis; Neptis rivularis; Ukraine; GenBank; -; MW499954  
 Lepidoptera; Nymphalidae; Coenonympha; Coenonympha glycerion; Finland; GenBank; -; MW500143  
 Lepidoptera; Nymphalidae; Hipparchia; Hipparchia aristaeus; Italy; GenBank; -; MW500177  
 Lepidoptera; Lycaenidae; Cupido; Cupido minimus; Norway; GenBank; -; MW500261  
 Lepidoptera; Nymphalidae; Boloria; Boloria pales; Macedonia; GenBank; -; MW500301  
 Lepidoptera; Pieridae; Pieris; Pieris napi; Belarus; GenBank; -; MW500303  
 Lepidoptera; Nymphalidae; Erebia; Erebia euryale; Russia; GenBank; -; MW500322  
 Lepidoptera; Nymphalidae; Hipparchia; Hipparchia semele; United Kingdom; GenBank; -; MW500339  
 Lepidoptera; Nymphalidae; Hipparchia; Hipparchia statilinus; Italy; GenBank; -; MW500377  
 Lepidoptera; Lycaenidae; Aricia; Aricia nicias; Sweden; GenBank; -; MW500445  
 Lepidoptera; Pieridae; Pieris; Pieris mannii; Liechtenstein; GenBank; -; MW500532  
 Lepidoptera; Nymphalidae; Erebia; Erebia gorge; Macedonia; GenBank; -; MW500558  
 Lepidoptera; Nymphalidae; Fabriciana; Argynnis adippe; Belarus; GenBank; -; MW500581  
 Lepidoptera; Pieridae; Leptidea; Leptidea juvernica; Russia; GenBank; -; MW500629  
 Lepidoptera; Pieridae; Colias; Colias alfacariensis; Serbia; Bold; EULEP537-15; MW500742  
 Lepidoptera; Nymphalidae; Charaxes; Charaxes jasius; Croatia; GenBank; -; MW500862  
 Lepidoptera; Nymphalidae; Boloria; Boloria pales; Macedonia; GenBank; -; MW500879  
 Lepidoptera; Nymphalidae; Boloria; Boloria thore; Norway; GenBank; -; MW500887  
 Lepidoptera; Nymphalidae; Maniola; Maniola jurtina; United Kingdom; GenBank; -; MW500900  
 Lepidoptera; Pieridae; Leptidea; Leptidea juvernica; Russia; GenBank; -; MW500931  
 Lepidoptera; Nymphalidae; Pararge; Pararge aegeria; Lithuania; GenBank; -; MW500933  
 Lepidoptera; Nymphalidae; Vanessa; Vanessa cardui; Belarus; GenBank; -; MW500944  
 Lepidoptera; Nymphalidae; Coenonympha; Coenonympha rhodopensis; Italy; GenBank; -; MW501003  
 Lepidoptera; Nymphalidae; Vanessa; Vanessa cardui; Italy; GenBank; -; MW501060  
 Lepidoptera; Nymphalidae; Coenonympha; Coenonympha dorus; Italy; GenBank; -; MW501065  
 Lepidoptera; Hesperidae; Pyrgus; Pyrgus malvoides; Italy; GenBank; -; MW501068  
 Lepidoptera; Nymphalidae; Coenonympha; Coenonympha pamphilus; Belarus; GenBank; -; MW501109  
 Lepidoptera; Lycaenidae; Polyommatus; Polyommatus icarus; Liechtenstein; GenBank; -; MW501110  
 Lepidoptera; Nymphalidae; Boloria; Boloria thore; Sweden; GenBank; -; MW501135  
 Lepidoptera; Papilionidae; Papilio; Papilio machaon; Greece; GenBank; -; MW501166  
 Lepidoptera; Nymphalidae; Maniola; Maniola jurtina; United Kingdom; GenBank; -; MW501221  
 Lepidoptera; Nymphalidae; Aphantopus; Aphantopus hyperantus; Belarus; Bold; EULEP3436-16; MW501239  
 Lepidoptera; Papilionidae; Papilio; Papilio machaon; Greece; GenBank; -; MW501266  
 Lepidoptera; Nymphalidae; Coenonympha; Coenonympha corinna; Italy; GenBank; -; MW501269  
 Lepidoptera; Nymphalidae; Hipparchia; Hipparchia leighebi; Italy; GenBank; -; MW501350  
 Lepidoptera; Nymphalidae; Erebia; Erebia euryale; Russia; GenBank; -; MW501387  
 Lepidoptera; Nymphalidae; Maniola; Maniola jurtina; United Kingdom; GenBank; -; MW501398  
 Lepidoptera; Nymphalidae; Vanessa; Vanessa atalanta; Latvia; GenBank; -; MW501460  
 Lepidoptera; Nymphalidae; Hipparchia; Hipparchia semele; United Kingdom; GenBank; -; MW501471  
 Lepidoptera; Pieridae; Colias; Colias hyale; Belarus; GenBank; -; MW501544  
 Lepidoptera; Lycaenidae; Lycaena; Lycaena alciphron; Belarus; GenBank; -; MW501565  
 Lepidoptera; Lycaenidae; Lycaena; Lycaena alciphron; Latvia; GenBank; -; MW501579  
 Lepidoptera; Lycaenidae; Lycaena; Lycaena dispar; Estonia; GenBank; -; MW501590  
 Lepidoptera; Nymphalidae; Coenonympha; Coenonympha oedippus; Liechtenstein; GenBank; -; MW501631  
 Lepidoptera; Papilionidae; Papilio; Papilio machaon; Belarus; GenBank; -; MW501635  
 Lepidoptera; Nymphalidae; Boloria; Boloria thore; Norway; GenBank; -; MW501656  
 Lepidoptera; Lycaenidae; Agriades; Albulina orbitulus; Sweden; GenBank; -; MW501709  
 Lepidoptera; Nymphalidae; Minois; Minois dryas; Switzerland; GenBank; -; MW501712  
 Lepidoptera; Lycaenidae; Polyommatus; Polyommatus ripartii; Russia; GenBank; -; MW501727  
 Lepidoptera; Pieridae; Pieris; Pieris mannii; Liechtenstein; GenBank; -; MW501828  
 Lepidoptera; Pieridae; Pieris; Pieris napi; Norway; GenBank; -; MW501853  
 Lepidoptera; Nymphalidae; Pararge; Pararge aegeria; Belarus; GenBank; -; MW501885  
 Lepidoptera; Nymphalidae; Boloria; Boloria thore; Sweden; GenBank; -; MW501892  
 Lepidoptera; Nymphalidae; Hyponephele; Hyponephele lupina; Russia; Bold; EULEP4926-16; MW501979  
 Lepidoptera; Nymphalidae; Chazara; Chazara briseis; Ukraine; GenBank; -; MW501989  
 Lepidoptera; Nymphalidae; Hipparchia; Hipparchia semele; United Kingdom; GenBank; -; MW502021  
 Lepidoptera; Nymphalidae; Euphydryas; Euphydryas cynthia; Bulgaria; GenBank; -; MW502025  
 Lepidoptera; Nymphalidae; Erebia; Erebia melampus; Austria; GenBank; -; MW502090  
 Lepidoptera; Nymphalidae; Boloria; Boloria selene; Norway; GenBank; -; MW502104  
 Lepidoptera; Nymphalidae; Hipparchia; Hipparchia semele; United Kingdom; GenBank; -; MW502106  
 Lepidoptera; Nymphalidae; Brintesia; Kanetisa circe; Greece; GenBank; -; MW502138  
 Lepidoptera; Nymphalidae; Brintesia; Kanetisa circe; Greece; GenBank; -; MW502145  
 Lepidoptera; Lycaenidae; Aricia; Aricia cramera; Spain; GenBank; -; MW502151  
 Lepidoptera; Nymphalidae; Maniola; Maniola jurtina; United Kingdom; GenBank; -; MW502209  
 Lepidoptera; Nymphalidae; Boloria; Boloria thore; Finland; GenBank; -; MW502237  
 Lepidoptera; Pieridae; Leptidea; Leptidea juvernica; Russia; GenBank; -; MW502261  
 Lepidoptera; Pieridae; Leptidea; Leptidea juvernica; Russia; GenBank; -; MW502289  
 Lepidoptera; Nymphalidae; Erebia; Erebia eriphyle; Switzerland; GenBank; -; MW502296

Lepidoptera;Nymphalidae;Vanessa;Vanessa atalanta;Croatia;GenBank;-;MW502410  
 Lepidoptera;Nymphalidae;Hipparchia;Hipparchia hermione;Norway;GenBank;-;MW502422  
 Lepidoptera;Nymphalidae;Hipparchia;Hipparchia semele;United Kingdom;GenBank;-;MW502439  
 Lepidoptera;Nymphalidae;Erebia;Erebia medusa;Norway;GenBank;-;MW502512  
 Lepidoptera;Lycaenidae;Cupido;Cupido alctes;Ukraine;GenBank;-;MW502543  
 Lepidoptera;Lycaenidae;Satyrium;Satyrium w-album;Sweden;GenBank;-;MW502549  
 Lepidoptera;Nymphalidae;Minois;Minois dryas;Liechtenstein;GenBank;-;MW502633  
 Lepidoptera;Lycaenidae;Phengaris;Maculinea teleius;Liechtenstein;GenBank;-;MW502690  
 Lepidoptera;Nymphalidae;Hipparchia;Hipparchia semele;United Kingdom;GenBank;-;MW502726  
 Lepidoptera;Nymphalidae;Euphydryas;Euphydryas cynthia;Bulgaria;GenBank;-;MW502804  
 Lepidoptera;Nymphalidae;Erebia;Erebia medusa;Norway;GenBank;-;MW502816  
 Lepidoptera;Nymphalidae;Erebia;Erebia medusa;Norway;GenBank;-;MW502838  
 Lepidoptera;Nymphalidae;Erebia;Erebia medusa;Norway;GenBank;-;MW502855  
 Lepidoptera;Nymphalidae;Aphantopus;Aphantopus hyperantus;United Kingdom;Bold;OXB1517-16;MW502908  
 Lepidoptera;Nymphalidae;Aphantopus;Aphantopus hyperantus;United Kingdom;Bold;OXB1516-16;MW502977  
 Lepidoptera;Pieridae;Leptidea;Leptidea juvernica;Finland;GenBank;-;MW503006  
 Lepidoptera;Pieridae;Pieris;Pieris napi;Liechtenstein;GenBank;-;MW503047  
 Lepidoptera;Nymphalidae;Maniola;Maniola jurtina;United Kingdom;GenBank;-;MW503069  
 Lepidoptera;Nymphalidae;Argynnis;Argynnis aglaja;United Kingdom;GenBank;-;MW503079  
 Lepidoptera;Nymphalidae;Maniola;Maniola jurtina;United Kingdom;GenBank;-;MW503080  
 Lepidoptera;Nymphalidae;Hyponephele;Hyponephele lupina;Russia;Bold;EULEP4927-16;MW503095  
 Lepidoptera;Nymphalidae;Maniola;Maniola jurtina;United Kingdom;GenBank;-;MW503098  
 Lepidoptera;Papilionidae;Papilio;Papilio machaon;Liechtenstein;GenBank;-;MW503139  
 Lepidoptera;Lycaenidae;Agriades;Albulina orbitulus;Sweden;GenBank;-;MW503185  
 Lepidoptera;Nymphalidae;Hipparchia;Hipparchia leighebi;Italy;GenBank;-;MW503285  
 Lepidoptera;Nymphalidae;Erebia;Erebia gorge;Macedonia;GenBank;-;MW503331  
 Lepidoptera;Nymphalidae;Vanessa;Vanessa atalanta;United Kingdom;GenBank;-;MW503337  
 Lepidoptera;Nymphalidae;Hipparchia;Hipparchia sbordonii;Italy;GenBank;-;MW503389  
 Lepidoptera;Nymphalidae;Boloria;Boloria thore;Sweden;GenBank;-;MW503413  
 Lepidoptera;Nymphalidae;Hipparchia;Hipparchia aristaeus;Italy;GenBank;-;MW503436  
 Lepidoptera;Nymphalidae;Maniola;Maniola jurtina;United Kingdom;GenBank;-;MW503474  
 Lepidoptera;Hesperiidae;Thymelicus;Thymelicus sylvestris;Belarus;GenBank;-;MW503489  
 Lepidoptera;Hesperiidae;Gegenes;Gegenes pumilio;Greece;GenBank;-;MW503500  
 Lepidoptera;Pieridae;Pieris;Pieris rapae;Belarus;GenBank;-;MW503501  
 Lepidoptera;Pieridae;Pieris;Pieris brassicae;Belarus;GenBank;-;MW503512  
 Lepidoptera;Nymphalidae;Nymphalis;Nymphalis io;Belarus;GenBank;-;MW503524  
 Lepidoptera;Nymphalidae;Erebia;Erebia gorge;Macedonia;GenBank;-;MW503531  
 Lepidoptera;Lycaenidae;Polyommatus;Polyommatus icarus;Estonia;GenBank;-;MW503533  
 Lepidoptera;Pieridae;Leptidea;Leptidea juvernica;Russia;GenBank;-;MW503551  
 Lepidoptera;Pieridae;Leptidea;Leptidea sinapis;Belarus;GenBank;-;MW503553  
 Lepidoptera;Lycaenidae;Polyommatus;Polyommatus icarus;Greece;GenBank;-;MW503555  
 Lepidoptera;Nymphalidae;Boloria;Boloria napaea;Sweden;GenBank;-;MW503589  
 Lepidoptera;Nymphalidae;Melitaea;Melitaea trivia;Greece;GenBank;-;MW503679  
 Lepidoptera;Nymphalidae;Chazara;Chazara briseis;Czech Republic;GenBank;-;MW653338  
 Lepidoptera;Lycaenidae;Agriades;Albulina orbitulus;Sweden;GenBank;-;MW857290  
 Lepidoptera;Nymphalidae;Fabriciana;Argynnis adippe;Sweden;GenBank;-;MZ026264  
 Lepidoptera;Nymphalidae;Fabriciana;Argynnis adippe;Sweden;GenBank;-;MZ026271  
 Lepidoptera;Nymphalidae;Fabriciana;Argynnis adippe;Finland;GenBank;-;MZ026282  
 Lepidoptera;Pieridae;Leptidea;Leptidea juvernica;Finland;GenBank;-;MZ622833  
 Lepidoptera;Pieridae;Leptidea;Leptidea sinapis;Finland;GenBank;-;MZ622839  
 Lepidoptera;Pieridae;Leptidea;Leptidea sinapis;Finland;GenBank;-;MZ623372  
 Lepidoptera;Pieridae;Leptidea;Leptidea sinapis;Finland;GenBank;-;MZ623386  
 Lepidoptera;Pieridae;Leptidea;Leptidea juvernica;Finland;GenBank;-;MZ625522  
 Lepidoptera;Pieridae;Leptidea;Leptidea sinapis;Finland;GenBank;-;MZ628594  
 Lepidoptera;Hesperiidae;Gegenes;Gegenes pumilio;Italy;GenBank;-;OK345547  
 Lepidoptera;Hesperiidae;Carcharodus;Carcharodus baeticus;Italy;Bold;WMB6801-19;OK345571  
 Lepidoptera;Hesperiidae;Carcharodus;Carcharodus alceae;Spain;GenBank;-;OK345603  
 Lepidoptera;Papilionidae;Papilio;Papilio machaon;Denmark;GenBank;-;OM346749  
 Lepidoptera;Hesperiidae;Carcharodus;Carcharodus alceae;Croatia;GenBank;-;ON435775  
 Lepidoptera;Hesperiidae;Erynnis;Erynnis tages;Croatia;GenBank;-;ON435820  
 Lepidoptera;Hesperiidae;Muschampia;Sloperia proto;Spain;GenBank;-;ON435882  
 Lepidoptera;Lycaenidae;Aricia;Aricia agestis;Croatia;GenBank;-;ON436027  
 Lepidoptera;Lycaenidae;Scolitantides;Scolitantides orion;Croatia;GenBank;-;ON436064  
 Lepidoptera;Pieridae;Anthocharis;Anthocharis cardamines;Croatia;GenBank;-;ON436231  
 Lepidoptera;Pieridae;Euchloe;Euchloe ausonia;Croatia;GenBank;-;ON436250  
 Lepidoptera;Papilionidae;Zerynthia;Zerynthia polyxena;Russia;GenBank;-;ON437050  
 Lepidoptera;Pieridae;Pieris;Pieris rapae;Croatia;GenBank;-;ON437129  
 Lepidoptera;Lycaenidae;Callophrys;Callophrys rubi;Russia;GenBank;-;OP430995  
 Lepidoptera;Nymphalidae;Aglais;Aglais ichnusa;Italy;Bold;BDE763-21;-  
 Lepidoptera;Nymphalidae;Aglais;Aglais ichnusa;Italy;Bold;BDE765-21;-  
 Lepidoptera;Nymphalidae;Aglais;Aglais urticae;Sweden;Bold;BDE753-21;-  
 Lepidoptera;Nymphalidae;Aglais;Aglais urticae;Greece;Bold;BDE755-21;-  
 Lepidoptera;Nymphalidae;Aglais;Aglais urticae;Italy;Bold;BDE764-21;-  
 Lepidoptera;Nymphalidae;Aglais;Aglais urticae;Denmark;Bold;BDE752-21;-  
 Lepidoptera;Nymphalidae;Aglais;Aglais urticae;Poland;Bold;BDE756-21;-  
 Lepidoptera;Nymphalidae;Aglais;Aglais urticae;Sweden;Bold;BDE754-21;-  
 Lepidoptera;Nymphalidae;Aphantopus;Aphantopus hyperantus;Norway;Bold;LON4634-16;-  
 Lepidoptera;Nymphalidae;Aphantopus;Aphantopus hyperantus;Finland;Bold;EULEP6379-20;-



Lepidoptera;Lycaenidae;Celastrina;Celastrina argiolus;Italy;Bold;BIBSA2289-20;-  
 Lepidoptera;Nymphalidae;Argynnis;Argynnis pandora;Italy;Bold;BIBSA2176-20;-  
 Lepidoptera;Nymphalidae;Argynnis;Argynnis paphia;France;Bold;BIBSA1981-19;-  
 Lepidoptera;Lycaenidae;Aricia;Aricia agestis;France;Bold;BIBSA1944-19;-  
 Lepidoptera;Lycaenidae;Aricia;Aricia agestis;France;Bold;BIBSA1987-19;-  
 Lepidoptera;Lycaenidae;Aricia;Aricia agestis;France;Bold;BIBSA1942-19;-  
 Lepidoptera;Lycaenidae;Aricia;Aricia agestis;France;Bold;BIBSA1943-19;-  
 Lepidoptera;Lycaenidae;Aricia;Aricia agestis;France;Bold;BIBSA1988-19;-  
 Lepidoptera;Pieridae;Colias;Colias crocea;France;Bold;BIBSA1965-19;-  
 Lepidoptera;Nymphalidae;Boloria;Boloria napaea;Norway;Bold;LON5659-17;-  
 Lepidoptera;Nymphalidae;Boloria;Boloria thore;Finland;Bold;EULEP6381-20;-  
 Lepidoptera;Nymphalidae;Boloria;Boloria titania;Estonia;Bold;EULEP2681-15;-  
 Lepidoptera;Nymphalidae;Hipparchia;Hipparchia semele;Sweden;Bold;EULEP6005-20;-  
 Lepidoptera;Lycaenidae;Callophrys;Callophrys rubi;Greece;Bold;EULEP6264-20;-  
 Lepidoptera;Lycaenidae;Callophrys;Callophrys rubi;Finland;Bold;EULEP6254-20;-  
 Lepidoptera;Lycaenidae;Callophrys;Callophrys rubi;France;Bold;BIBSA1940-19;-  
 Lepidoptera;Hesperiidae;Carcharodus;Carcharodus alceae;Italy;Bold;BIBSA2177-20;-  
 Lepidoptera;Hesperiidae;Carcharodus;Carcharodus alceae;Croatia;Bold;EULEP6170-20;-  
 Lepidoptera;Lycaenidae;Erebia;Erebia montana;Italy;Bold;BIBSA2609-20;-  
 Lepidoptera;Lycaenidae;Celastrina;Celastrina argiolus;Italy;Bold;BIBSA2175-20;-  
 Lepidoptera;Lycaenidae;Celastrina;Celastrina argiolus;Italy;Bold;BIBSA2275-20;-  
 Lepidoptera;Nymphalidae;Charaxes;Charaxes jasius;Italy;Bold;BIBSA2107-20;-  
 Lepidoptera;Nymphalidae;Charaxes;Charaxes jasius;Italy;Bold;BIBSA2391-20;-  
 Lepidoptera;Nymphalidae;Charaxes;Charaxes jasius;France;Bold;ATLAS071-22;-  
 Lepidoptera;Nymphalidae;Coenonympha;Coenonympha corinna;Italy;Bold;BIBSA2266-20;-  
 Lepidoptera;Nymphalidae;Coenonympha;Coenonympha corinna;Italy;Bold;WMB6554-18;-  
 Lepidoptera;Pieridae;Euchloe;Euchloe ausonia;Italy;Bold;BIBSA2292-20;-  
 Lepidoptera;Nymphalidae;Coenonympha;Coenonympha oedippus;Austria;Bold;ABOLD495-16;-  
 Lepidoptera;Nymphalidae;Coenonympha;Coenonympha pamphilus;France;Bold;BIBSA1978-19;-  
 Lepidoptera;Lycaenidae;Eumedonia;Eumedonia eumedon;Norway;Bold;LON6411-17;-  
 Lepidoptera;Nymphalidae;Coenonympha;Coenonympha pamphilus;France;Bold;BIBSA1953-19;-  
 Lepidoptera;Nymphalidae;Coenonympha;Coenonympha pamphilus;France;Bold;BIBSA1952-19;-  
 Lepidoptera;Nymphalidae;Coenonympha;Coenonympha pamphilus;France;Bold;BIBSA1977-19;-  
 Lepidoptera;Pieridae;Colias;Colias alfacariensis;Russia;Bold;SACOL345-19;-  
 Lepidoptera;Pieridae;Colias;Colias crocea;Italy;Bold;BIBSA2286-20;-  
 Lepidoptera;Pieridae;Colias;Colias crocea;Italy;Bold;BIBSA2385-20;-  
 Lepidoptera;Pieridae;Colias;Colias crocea;Italy;Bold;BIBSA2282-20;-  
 Lepidoptera;Pieridae;Colias;Colias crocea;Italy;Bold;BIBSA2428-20;-  
 Lepidoptera;Pieridae;Colias;Colias crocea;Italy;Bold;BIBSA2400-20;-  
 Lepidoptera;Pieridae;Colias;Colias crocea;Italy;Bold;BIBSA2386-20;-  
 Lepidoptera;Pieridae;Colias;Colias crocea;Italy;Bold;BIBSA2399-20;-  
 Lepidoptera;Pieridae;Colias;Colias crocea;Italy;Bold;BIBSA2285-20;-  
 Lepidoptera;Pieridae;Colias;Colias crocea;Italy;Bold;BIBSA2427-20;-  
 Lepidoptera;Pieridae;Colias;Colias hyale;Turkey;Bold;SACOL243-18;-  
 Lepidoptera;Pieridae;Colias;Colias hyale;Russia;Bold;SACOL182-17;-  
 Lepidoptera;Pieridae;Colias;Colias hyale;Russia;Bold;SACOL181-17;-  
 Lepidoptera;Pieridae;Colias;Colias palaeno;Norway;Bold;LON4576-16;-  
 Lepidoptera;Lycaenidae;Cupido;Cupido argiades;France;Bold;BIBSA1945-19;-  
 Lepidoptera;Lycaenidae;Cupido;Cupido argiades;France;Bold;BIBSA1946-19;-  
 Lepidoptera;Lycaenidae;Cupido;Cupido minimus;Sweden;Bold;EULEP6032-20;-  
 Lepidoptera;Lycaenidae;Cupido;Cupido minimus;Croatia;Bold;MIMAB011-21;-  
 Lepidoptera;Nymphalidae;Hipparchia;Hipparchia aristaeus;Italy;Bold;ATLAS257-22;-  
 Lepidoptera;Nymphalidae;Hipparchia;Hipparchia fagi;Italy;Bold;BIBSA2407-20;-  
 Lepidoptera;Nymphalidae;Hipparchia;Hipparchia neapolitana;Italy;Bold;BIBSA2395-20;-  
 Lepidoptera;Nymphalidae;Hipparchia;Hipparchia semele;France;Bold;BIBSA1986-19;-  
 Lepidoptera;Nymphalidae;Erebia;Erebia manto;Spain;Bold;BDE233-19;-  
 Lepidoptera;Nymphalidae;Erebia;Erebia montana;Italy;Bold;BIBSA2608-20;-  
 Lepidoptera;Lycaenidae;Lampides;Lampides boeticus;Italy;Bold;BIBSA2178-20;-  
 Lepidoptera;Lycaenidae;Favonius;Favonius quercus;Norway;Bold;LON5668-17;-  
 Lepidoptera;Hesperiidae;Gegenes;Gegenes nostradamus;Spain;Bold;VNMB335-08;-  
 Lepidoptera;Hesperiidae;Gegenes;Gegenes nostradamus;Spain;Bold;VNMB336-08;-  
 Lepidoptera;Hesperiidae;Gegenes;Gegenes pumilio;Greece;Bold;VNMB327-08;-  
 Lepidoptera;Pieridae;Gonepteryx;Gonepteryx cleopatra;Italy;Bold;BIBSA2548-20;-  
 Lepidoptera;Pieridae;Gonepteryx;Gonepteryx cleopatra;Italy;Bold;BIBSA2165-20;-  
 Lepidoptera;Pieridae;Gonepteryx;Gonepteryx cleopatra;Italy;Bold;BIBSA2383-20;-  
 Lepidoptera;Pieridae;Gonepteryx;Gonepteryx cleopatra;Italy;Bold;BIBSA2549-20;-  
 Lepidoptera;Pieridae;Gonepteryx;Gonepteryx cleopatra;Italy;Bold;BIBSA2576-20;-  
 Lepidoptera;Pieridae;Gonepteryx;Gonepteryx cleopatra;Italy;Bold;BIBSA2550-20;-  
 Lepidoptera;Pieridae;Gonepteryx;Gonepteryx cleopatra;Italy;Bold;BIBSA2429-20;-  
 Lepidoptera;Hesperiidae;Heteropterus;Heteropterus morpheus;France;Bold;BIBSA1950-19;-  
 Lepidoptera;Hesperiidae;Heteropterus;Heteropterus morpheus;France;Bold;BIBSA1951-19;-  
 Lepidoptera;Nymphalidae;Hipparchia;Hipparchia neapolitana;Italy;Bold;BIBSA2396-20;-  
 Lepidoptera;Nymphalidae;Hipparchia;Hipparchia semele;France;Bold;BIBSA1985-19;-  
 Lepidoptera;Nymphalidae;Hipparchia;Hipparchia statilinus;Italy;Bold;BIBSA2422-20;-  
 Lepidoptera;Lycaenidae;Iolana;Iolana iolas;Turkey;Bold;ATLAS297-22;-  
 Lepidoptera;Lycaenidae;Iolana;Iolana iolas;Turkey;Bold;ATLAS296-22;-  
 Lepidoptera;Nymphalidae;Issoria;Issoria lathonia;Italy;Bold;BIBSA2128-20;-  
 Lepidoptera;Lycaenidae;Lampides;Lampides boeticus;Italy;Bold;BIBSA2430-20;-

Lepidoptera ;Lycaenidae;Lampides;Lampides boeticus;Italy;Bold;BIBSA2288-20;-  
 Lepidoptera ;Lycaenidae;Lampides;Lampides boeticus;Italy;Bold;BIBSA2287-20;-  
 Lepidoptera ;Lycaenidae;Lampides;Lampides boeticus;Italy;Bold;BIBSA2415-20;-  
 Lepidoptera ;Lycaenidae;Lampides;Lampides boeticus;Italy;Bold;BIBSA2431-20;-  
 Lepidoptera ;Lycaenidae;Lampides;Lampides boeticus;Italy;Bold;BIBSA2416-20;-  
 Lepidoptera ;Lycaenidae;Lampides;Lampides boeticus;Italy;Bold;BIBSA2359-20;-  
 Lepidoptera;Nymphalidae;Maniola;Maniola jurtina;France;Bold;BIBSA1967-19;-  
 Lepidoptera;Nymphalidae;Lasiommata;Lasiommata megera;France;Bold;BIBSA1962-19;-  
 Lepidoptera;Nymphalidae;Lasiommata;Lasiommata megera;France;Bold;BIBSA1972-19;-  
 Lepidoptera;Nymphalidae;Lasiommata;Lasiommata megera;Italy;Bold;BIBSA2361-20;-  
 Lepidoptera;Nymphalidae;Lasiommata;Lasiommata megera;Italy;Bold;BIBSA2360-20;-  
 Lepidoptera;Nymphalidae;Lasiommata;Lasiommata megera;Italy;Bold;BIBSA2362-20;-  
 Lepidoptera;Nymphalidae;Lasiommata;Lasiommata megera;Italy;Bold;BIBSA2284-20;-  
 Lepidoptera;Nymphalidae;Lasiommata;Lasiommata megera;Italy;Bold;BIBSA2291-20;-  
 Lepidoptera;Nymphalidae;Lasiommata;Lasiommata megera;France;Bold;BIBSA1971-19;-  
 Lepidoptera;Nymphalidae;Lasiommata;Lasiommata paramegaera;Italy;Bold;BIBSA2216-20;-  
 Lepidoptera;Nymphalidae;Lasiommata;Lasiommata paramegaera;Italy;Bold;BIBSA2217-20;-  
 Lepidoptera;Pieridae;Leptidea;Leptidea juvernica;Czech Republic;Bold;HBOK089-08;-  
 Lepidoptera;Pieridae;Leptidea;Leptidea sinapis;Norway;Bold;LON5682-17;-  
 Lepidoptera;Pieridae;Leptidea;Leptidea sinapis;Slovenia;Bold;EULEP6457-20;-  
 Lepidoptera;Pieridae;Leptidea;Leptidea sinapis;Slovenia;Bold;EULEP6456-20;-  
 Lepidoptera;Pieridae;Leptidea;Leptidea sinapis;Slovenia;Bold;EULEP6452-20;-  
 Lepidoptera;Pieridae;Leptidea;Leptidea sinapis;Slovenia;Bold;EULEP6453-20;-  
 Lepidoptera;Pieridae;Leptidea;Leptidea sinapis;Slovenia;Bold;EULEP6455-20;-  
 Lepidoptera;Pieridae;Leptidea;Leptidea sinapis;France;Bold;BIBSA1957-19;-  
 Lepidoptera;Pieridae;Leptidea;Leptidea sinapis;France;Bold;BIBSA1955-19;-  
 Lepidoptera;Pieridae;Leptidea;Leptidea sinapis;France;Bold;BIBSA1956-19;-  
 Lepidoptera;Pieridae;Leptidea;Leptidea sinapis;Slovenia;Bold;EULEP6454-20;-  
 Lepidoptera ;Lycaenidae;Leptotes;Leptotes pirithous;Italy;Bold;BIBSA2432-20;-  
 Lepidoptera ;Lycaenidae;Leptotes;Leptotes pirithous;Italy;Bold;BIBSA2392-20;-  
 Lepidoptera ;Lycaenidae;Leptotes;Leptotes pirithous;Italy;Bold;BIBSA2393-20;-  
 Lepidoptera ;Lycaenidae;Leptotes;Leptotes pirithous;Italy;Bold;BIBSA2390-20;-  
 Lepidoptera ;Lycaenidae;Leptotes;Leptotes pirithous;Italy;Bold;BIBSA2394-20;-  
 Lepidoptera ;Lycaenidae;Leptotes;Leptotes pirithous;Italy;Bold;BIBSA2433-20;-  
 Lepidoptera;Lycaenidae;Lycaena;Lycaena phlaeas;Sweden;Bold;EULEP6033-20;-  
 Lepidoptera;Lycaenidae;Lycaena;Lycaena phlaeas;Italy;Bold;BIBSA2408-20;-  
 Lepidoptera;Lycaenidae;Lycaena;Lycaena phlaeas;Italy;Bold;BIBSA2405-20;-  
 Lepidoptera;Lycaenidae;Lycaena;Lycaena phlaeas;Italy;Bold;BIBSA2404-20;-  
 Lepidoptera;Lycaenidae;Lycaena;Lycaena phlaeas;Netherlands;Bold;NLLEA1466-14;-  
 Lepidoptera;Hesperiidae;Ochlodes;Ochlodes sylvanus;France;Bold;BIBSA1963-19;-  
 Lepidoptera;Papilionidae;Papilio;Papilio machaon;Italy;Bold;BIBSA2417-20;-  
 Lepidoptera;Papilionidae;Papilio;Papilio machaon;Italy;Bold;BIBSA2434-20;-  
 Lepidoptera;Nymphalidae;Maniola;Maniola jurtina;France;Bold;BIBSA1937-19;-  
 Lepidoptera;Nymphalidae;Maniola;Maniola jurtina;Norway;Bold;LON6142-17;-  
 Lepidoptera;Nymphalidae;Maniola;Maniola jurtina;France;Bold;BIBSA1936-19;-  
 Lepidoptera;Nymphalidae;Maniola;Maniola jurtina;France;Bold;BIBSA1935-19;-  
 Lepidoptera;Nymphalidae;Maniola;Maniola jurtina;France;Bold;BIBSA1968-19;-  
 Lepidoptera;Nymphalidae;Maniola;Maniola jurtina;Norway;Bold;LON6829-18;-  
 Lepidoptera;Nymphalidae;Maniola;Maniola jurtina;Netherlands;Bold;NLLEA1465-14;-  
 Lepidoptera ;Nymphalidae;Pararge;Pararge aegeria;France;Bold;BIBSA1934-19;-  
 Lepidoptera ;Nymphalidae;Pararge;Pararge aegeria;France;Bold;BIBSA1933-19;-  
 Lepidoptera;Nymphalidae;Melanargia;Melanargia galathea;France;Bold;BIBSA1980-19;-  
 Lepidoptera;Pieridae;Pieris;Pieris mannii;Italy;Bold;BIBSA2409-20;-  
 Lepidoptera;Nymphalidae;Melitaea;Melitaea aurelia;Ukraine;Bold;MBMPA194-09;-  
 Lepidoptera;Nymphalidae;Melitaea;Melitaea aurelia;Ukraine;Bold;MBMPA191-09;-  
 Lepidoptera;Nymphalidae;Melitaea;Melitaea aurelia;Ukraine;Bold;MBMPA196-09;-  
 Lepidoptera;Nymphalidae;Melitaea;Melitaea aurelia;Ukraine;Bold;MBMPA198-09;-  
 Lepidoptera;Nymphalidae;Melitaea;Melitaea aurelia;Ukraine;Bold;MBMPA197-09;-  
 Lepidoptera;Nymphalidae;Melitaea;Melitaea aurelia;Ukraine;Bold;MBMPA189-09;-  
 Lepidoptera;Nymphalidae;Melitaea;Melitaea aurelia;Ukraine;Bold;MBMPA193-09;-  
 Lepidoptera;Nymphalidae;Melitaea;Melitaea aurelia;Ukraine;Bold;MBMPA192-09;-  
 Lepidoptera;Nymphalidae;Melitaea;Melitaea aurelia;Ukraine;Bold;MBMPA190-09;-  
 Lepidoptera;Nymphalidae;Melitaea;Melitaea aurelia;Ukraine;Bold;MBMPA195-09;-  
 Lepidoptera;Nymphalidae;Melitaea;Melitaea cinxia;Norway;Bold;LON1107-12;-  
 Lepidoptera;Nymphalidae;Melitaea;Melitaea didyma;Croatia;Bold;LON7271-18;-  
 Lepidoptera;Pieridae;Pieris;Pieris rapae;Slovakia;Bold;HMYZ021-19;-  
 Lepidoptera;Hesperiidae;Ochlodes;Ochlodes sylvanus;Norway;Bold;LON6412-17;-  
 Lepidoptera;Papilionidae;Papilio;Papilio machaon;Finland;Bold;EULEP6383-20;-  
 Lepidoptera;Papilionidae;Papilio;Papilio machaon;Italy;Bold;BIBSA2281-20;-  
 Lepidoptera;Papilionidae;Papilio;Papilio machaon;France;Bold;EULEP6152-20;-  
 Lepidoptera;Papilionidae;Papilio;Papilio machaon;Italy;Bold;BIBSA2542-20;-  
 Lepidoptera;Papilionidae;Papilio;Papilio machaon;Italy;Bold;BIBSA2418-20;-  
 Lepidoptera;Papilionidae;Papilio;Papilio machaon;Italy;Bold;BIBSA2556-20;-  
 Lepidoptera ;Nymphalidae;Pararge;Pararge aegeria;Italy;Bold;BIBSA2540-20;-  
 Lepidoptera ;Nymphalidae;Pararge;Pararge aegeria;France;Bold;BIBSA1976-19;-  
 Lepidoptera ;Nymphalidae;Pararge;Pararge aegeria;Norway;Bold;LON6413-17;-  
 Lepidoptera ;Nymphalidae;Pararge;Pararge aegeria;France;Bold;BIBSA1966-19;-  
 Lepidoptera;Lycaenidae;Polyommatus;Polyommatus icarus;France;Bold;BIBSA1970-19;-

Lepidoptera;Lycaenidae;Polyommatus;Polyommatus icarus;Turkey;Bold;LOWAB287-09;-  
 Lepidoptera ;Nymphalidae;Pararge;Pararge aegeria;Italy;Bold;BIBSA2301-20;-  
 Lepidoptera ;Nymphalidae;Pararge;Pararge aegeria;France;Bold;BIBSA1975-19;-  
 Lepidoptera;Nymphalidae;Vanessa;Vanessa atalanta;Italy;Bold;BIBSA2420-20;-  
 Lepidoptera;Pieridae;Pieris;Pieris brassicae;Italy;Bold;BIBSA2425-20;-  
 Lepidoptera;Pieridae;Pieris;Pieris brassicae;Italy;Bold;BIBSA2204-20;-  
 Lepidoptera;Pieridae;Pieris;Pieris brassicae;Italy;Bold;BIBSA2172-20;-  
 Lepidoptera;Pieridae;Pieris;Pieris brassicae;France;Bold;BIBSA2267-20;-  
 Lepidoptera;Pieridae;Pontia;Pieris edusa;Italy;Bold;BIBSA2283-20;-  
 Lepidoptera;Pieridae;Pieris;Pieris mannii;Italy;Bold;BIBSA2410-20;-  
 Lepidoptera;Pieridae;Pieris;Pieris mannii;Italy;Bold;BIBSA2426-20;-  
 Lepidoptera;Pieridae;Pieris;Pieris mannii;Croatia;Bold;EULEP6154-20;-  
 Lepidoptera;Pieridae;Pieris;Pieris mannii;Italy;Bold;BIBSA2363-20;-  
 Lepidoptera;Pieridae;Pieris;Pieris napi;Netherlands;Bold;NLLEA1467-14;-  
 Lepidoptera;Pieridae;Pieris;Pieris rapae;Netherlands;Bold;NLLEA1464-14;-  
 Lepidoptera;Pieridae;Pieris;Pieris rapae;Italy;Bold;BIBSA2414-20;-  
 Lepidoptera;Pieridae;Pieris;Pieris rapae;Italy;Bold;BIBSA2543-20;-  
 Lepidoptera;Pieridae;Pieris;Pieris rapae;Italy;Bold;BIBSA2233-20;-  
 Lepidoptera;Pieridae;Pieris;Pieris rapae;Italy;Bold;BIBSA2424-20;-  
 Lepidoptera;Pieridae;Pieris;Pieris rapae;Belarus;Bold;GMBMR047-17;-  
 Lepidoptera;Pieridae;Pieris;Pieris rapae;France;Bold;BIBSA1941-19;-  
 Lepidoptera;Pieridae;Pieris;Pieris rapae;France;Bold;BIBSA1979-19;-  
 Lepidoptera;Pieridae;Pieris;Pieris rapae;Italy;Bold;BIBSA2553-20;-  
 Lepidoptera;Pieridae;Pieris;Pieris rapae;Italy;Bold;BIBSA2300-20;-  
 Lepidoptera;Nymphalidae;Pyronia;Pyronia cecilia;Italy;Bold;BIBSA2234-20;-  
 Lepidoptera;Nymphalidae;Polygonia;Polygonia egea;Italy;Bold;BIBSA2459-20;-  
 Lepidoptera;Lycaenidae;Polyommatus;Polyommatus icarus;Italy;Bold;BIBSA2171-20;-  
 Lepidoptera;Lycaenidae;Polyommatus;Polyommatus icarus;Italy;Bold;WMB229-11;-  
 Lepidoptera;Hesperiidae;Thymelicus;Thymelicus acteon;France;Bold;BIBSA1948-19;-  
 Lepidoptera;Pieridae;Pontia;Pieris edusa;Italy;Bold;BIBSA2413-20;-  
 Lepidoptera;Hesperiidae;Thymelicus;Thymelicus acteon;France;Bold;BIBSA1947-19;-  
 Lepidoptera;Lycaenidae;Polyommatus;Polyommatus icarus;Norway;Bold;TSZJK790-16;-  
 Lepidoptera;Lycaenidae;Polyommatus;Polyommatus icarus;Turkey;Bold;LOWAB167-09;-  
 Lepidoptera;Lycaenidae;Polyommatus;Polyommatus icarus;France;Bold;BIBSA1969-19;-  
 Lepidoptera;Lycaenidae;Polyommatus;Polyommatus icarus;France;Bold;BIBSA1961-19;-  
 Lepidoptera;Lycaenidae;Polyommatus;Polyommatus icarus;France;Bold;BIBSA1960-19;-  
 Lepidoptera;Lycaenidae;Polyommatus;Polyommatus icarus;France;Bold;BIBSA1958-19;-  
 Lepidoptera;Lycaenidae;Polyommatus;Polyommatus icarus;France;Bold;BIBSA1959-19;-  
 Lepidoptera;Lycaenidae;Polyommatus;Polyommatus icarus;Italy;Bold;BIBSA2419-20;-  
 Lepidoptera;Lycaenidae;Polyommatus;Polyommatus icarus;Italy;Bold;ATLAS620-22;-  
 Lepidoptera;Nymphalidae;Vanessa;Vanessa atalanta;France;Bold;BIBSA1964-19;-  
 Lepidoptera;Nymphalidae;Vanessa;Vanessa cardui;Norway;Bold;LON5674-17;-  
 Lepidoptera;Nymphalidae;Vanessa;Vanessa cardui;Italy;Bold;BIBSA2387-20;-  
 Lepidoptera;Nymphalidae;Vanessa;Vanessa cardui;Italy;Bold;BIBSA2402-20;-  
 Lepidoptera;Nymphalidae;Vanessa;Vanessa cardui;Italy;Bold;BIBSA2544-20;-  
 Lepidoptera;Pieridae;Pontia;Pieris edusa;Italy;Bold;ATLAS663-22;-  
 Lepidoptera;Pieridae;Pontia;Pieris edusa;Italy;Bold;BIBSA2398-20;-  
 Lepidoptera;Pieridae;Pontia;Pieris edusa;Italy;Bold;BIBSA2397-20;-  
 Lepidoptera;Lycaenidae;Pseudophilotes;Pseudophilotes baton;Spain;Bold;BDE289-19;-  
 Lepidoptera;Nymphalidae;Pyronia;Pyronia tithonus;France;Bold;BIBSA1938-19;-  
 Lepidoptera;Nymphalidae;Pyronia;Pyronia tithonus;France;Bold;BIBSA1939-19;-  
 Lepidoptera;Hesperiidae;Pyrgus;Pyrgus armoricanus;Italy;Bold;ATLAS704-22;-  
 Lepidoptera;Hesperiidae;Thymelicus;Thymelicus sylvestris;United Kingdom;Bold;ANBIO330-19;-  
 Lepidoptera;Nymphalidae;Vanessa;Vanessa cardui;Italy;Bold;BIBSA2436-20;-  
 Lepidoptera;Nymphalidae;Pyronia;Pyronia cecilia;Italy;Bold;BIBSA2215-20;-  
 Lepidoptera;Hesperiidae;Thymelicus;Thymelicus acteon;France;Bold;BIBSA1984-19;-  
 Lepidoptera;Hesperiidae;Thymelicus;Thymelicus acteon;France;Bold;BIBSA1949-19;-  
 Lepidoptera;Nymphalidae;Pyronia;Pyronia cecilia;Italy;Bold;BIBSA2168-20;-  
 Lepidoptera;Nymphalidae;Pyronia;Pyronia tithonus;France;Bold;BIBSA1974-19;-  
 Lepidoptera;Nymphalidae;Vanessa;Vanessa atalanta;United Kingdom;Bold;ANBIO196-19;-  
 Lepidoptera;Nymphalidae;Vanessa;Vanessa atalanta;Italy;Bold;BIBSA2403-20;-  
 Lepidoptera;Hesperiidae;Thymelicus;Thymelicus acteon;France;Bold;BIBSA1983-19;-  
 Lepidoptera;Nymphalidae;Vanessa;Vanessa cardui;Italy;Bold;BIBSA2388-20;-  
 Lepidoptera;Nymphalidae;Vanessa;Vanessa cardui;Italy;Bold;BIBSA2435-20;-  
 Lepidoptera;Nymphalidae;Vanessa;Vanessa cardui;Italy;Bold;BIBSA2421-20;-  
 Lepidoptera;Nymphalidae;Vanessa;Vanessa cardui;Italy;Bold;BIBSA2389-20;-  
 Lepidoptera;Nymphalidae;Vanessa;Vanessa atalanta;Italy;Bold;BIBSA2412-20;-  
 Lepidoptera;Nymphalidae;Vanessa;Vanessa cardui;Italy;Bold;BIBSA2401-20;-  
 Lepidoptera;Nymphalidae;Vanessa;Vanessa atalanta;Italy;Bold;BIBSA2411-20;-  
 Lepidoptera;Nymphalidae;Vanessa;Vanessa cardui;Italy;Bold;BIBSA2557-20;-  
 Lepidoptera;Nymphalidae;Vanessa;Vanessa cardui;Italy;Bold;BIBSA2547-20;-  
 Lepidoptera;Nymphalidae;Vanessa;Vanessa atalanta;Italy;Bold;BIBSA2384-20;-  
 Odonata;Coenagrionidae;Nehalennia;Nehalennia speciosa;Russia;GenBank;-;AM696290  
 Odonata;Coenagrionidae;Nehalennia;Nehalennia speciosa;Russia;GenBank;-;FN252225  
 Odonata;Coenagrionidae;Nehalennia;Nehalennia speciosa;Russia;GenBank;-;FN252227  
 Odonata;Coenagrionidae;Nehalennia;Nehalennia speciosa;Russia;GenBank;-;FN252228  
 Odonata;Coenagrionidae;Nehalennia;Nehalennia speciosa;Russia;GenBank;-;FN252229  
 Odonata;Coenagrionidae;Nehalennia;Nehalennia speciosa;Russia;GenBank;-;FN252230

Odonata;Coenagrionidae;Coenagrion;Coenagrion mercuriale;Italy;GenBank;-;KX241514  
 Odonata;Cordulegasteridae;Cordulegaster;Cordulegaster heros;Bulgaria;GenBank;-;MK779812  
 Odonata;Libellulidae;Sympetrum;Sympetrum fonscolombii;Malta;GenBank;-;MN701480  
 Odonata;Libellulidae;Sympetrum;Sympetrum fonscolombii;Malta;GenBank;-;MN701485  
 Odonata;Libellulidae;Sympetrum;Sympetrum fonscolombii;Malta;GenBank;-;MN701488  
 Odonata;Libellulidae;Crocotthemis;Crocotthemis erythraea;Malta;GenBank;-;MN701489  
 Odonata;Coenagrionidae;Ischnura;Ischnura genei;Malta;GenBank;-;MN701492  
 Odonata;Aeshnidae;Anax;Anax imperator;Malta;GenBank;-;MN701497  
 Odonata;Coenagrionidae;Ischnura;Ischnura genei;Malta;GenBank;-;MN701499  
 Odonata;Libellulidae;Sympetrum;Sympetrum fonscolombii;Malta;GenBank;-;MN701503  
 Odonata;Libellulidae;Ischnura;Ischnura genei;Malta;GenBank;-;MN701505  
 Odonata;Coenagrionidae;Ischnura;Ischnura genei;Malta;GenBank;-;MN701507  
 Odonata;Aeshnidae;Anax;Anax imperator;Malta;GenBank;-;MN701510  
 Odonata;Libellulidae;Sympetrum;Sympetrum fonscolombii;Malta;GenBank;-;MN701513  
 Odonata;Libellulidae;Sympetrum;Sympetrum fonscolombii;Malta;GenBank;-;MN701518  
 Odonata;Aeshnidae;Anax;Anax imperator;Malta;GenBank;-;MN701520  
 Odonata;Coenagrionidae;Ischnura;Ischnura genei;Malta;GenBank;-;MN701521  
 Odonata;Libellulidae;Sympetrum;Sympetrum fonscolombii;Malta;GenBank;-;MN701526  
 Odonata;Coenagrionidae;Orthetrum;Orthetrum coeruleus;Malta;GenBank;-;MN701535  
 Odonata;Coenagrionidae;Ischnura;Ischnura genei;Malta;GenBank;-;MN701537  
 Odonata;Libellulidae;Sympetrum;Sympetrum fonscolombii;Malta;GenBank;-;MN701539  
 Odonata;Coenagrionidae;Ischnura;Ischnura genei;Malta;GenBank;-;MN701541  
 Odonata;Coenagrionidae;Ischnura;Ischnura genei;Malta;GenBank;-;MN701543  
 Odonata;Libellulidae;Trithemis;Trithemis annulata;Malta;GenBank;-;MN701545  
 Odonata;Libellulidae;Crocotthemis;Crocotthemis erythraea;Malta;GenBank;-;MN701547  
 Odonata;Aeshnidae;Anax;Anax imperator;Malta;GenBank;-;MN701548  
 Odonata;Libellulidae;Sympetrum;Sympetrum fonscolombii;Malta;GenBank;-;MN701550  
 Odonata;Libellulidae;Sympetrum;Sympetrum fonscolombii;Malta;GenBank;-;MN701554  
 Odonata;Libellulidae;Trithemis;Trithemis annulata;Malta;GenBank;-;MN701557  
 Odonata;Libellulidae;Sympetrum;Sympetrum fonscolombii;Malta;GenBank;-;MN701559  
 Odonata;Coenagrionidae;Ischnura;Ischnura genei;Malta;GenBank;-;MN701560  
 Odonata;Aeshnidae;Aeshna;Aeshna subarctica;Norway;GenBank;-;MN847794  
 Odonata;Libellulidae;Sympetrum;Sympetrum danae;Denmark;GenBank;-;MN847798  
 Odonata;Libellulidae;Sympetrum;Sympetrum danae;Denmark;GenBank;-;MN847799  
 Odonata;Libellulidae;Sympetrum;Sympetrum danae;Denmark;GenBank;-;MN847805  
 Odonata;Libellulidae;Sympetrum;Sympetrum danae;Denmark;GenBank;-;MN847807  
 Odonata;Libellulidae;Libellula;Libellula quadrimaculata;Denmark;GenBank;-;MN847820  
 Odonata;Libellulidae;Libellula;Libellula quadrimaculata;Denmark;GenBank;-;MN847821  
 Odonata;Libellulidae;Libellula;Libellula quadrimaculata;Denmark;GenBank;-;MN847822  
 Odonata;Libellulidae;Libellula;Libellula quadrimaculata;Denmark;GenBank;-;MN847823  
 Odonata;Aeshnidae;Aeshna;Aeshna juncea;Denmark;GenBank;-;MN847870  
 Odonata;Aeshnidae;Aeshna;Aeshna juncea;Denmark;GenBank;-;MN847873  
 Odonata;Aeshnidae;Aeshna;Aeshna cyanea;Denmark;GenBank;-;MN939078  
 Odonata;Aeshnidae;Aeshna;Aeshna cyanea;Denmark;GenBank;-;MN939081  
 Odonata;Aeshnidae;Aeshna;Aeshna cyanea;Denmark;GenBank;-;MN939083  
 Odonata;Libellulidae;Orthetrum;Orthetrum coeruleus;Denmark;GenBank;-;MN957914  
 Odonata;Libellulidae;Orthetrum;Orthetrum coeruleus;Denmark;GenBank;-;MN957915  
 Odonata;Libellulidae;Orthetrum;Orthetrum coeruleus;Greece;GenBank;-;MN957939  
 Odonata;Libellulidae;Orthetrum;Orthetrum coeruleus;Spain;GenBank;-;MN957940  
 Odonata;Libellulidae;Orthetrum;Orthetrum coeruleus;Greece;GenBank;-;MN957946  
 Odonata;Libellulidae;Orthetrum;Orthetrum coeruleus;Greece;GenBank;-;MN957947  
 Odonata;Libellulidae;Orthetrum;Orthetrum cancellatum;Denmark;GenBank;-;MN959414  
 Odonata;Libellulidae;Orthetrum;Orthetrum cancellatum;Denmark;GenBank;-;MN959427  
 Odonata;Libellulidae;Orthetrum;Orthetrum cancellatum;Denmark;GenBank;-;MN959440  
 Odonata;Libellulidae;Orthetrum;Orthetrum cancellatum;Sweden;GenBank;-;MN959444  
 Odonata;Libellulidae;Orthetrum;Orthetrum cancellatum;Sweden;GenBank;-;MN959445  
 Odonata;Aeshnidae;Aeshna;Aeshna affinis;Italy;GenBank;-;MT298234  
 Odonata;Aeshnidae;Aeshna;Aeshna isocetes;Italy;GenBank;-;MT298241  
 Odonata;Aeshnidae;Anax;Anax ephippiger;Italy;GenBank;-;MT298251  
 Odonata;Coenagrionidae;Ceriagrion;Ceriagrion tenellum;Italy;GenBank;-;MT298299  
 Odonata;Coenagrionidae;Coenagrion;Coenagrion mercuriale;Italy;GenBank;-;MT298339  
 Odonata;Coenagrionidae;Erythromma;Erythromma lindenii;Italy;GenBank;-;MT298435  
 Odonata;Coenagrionidae;Erythromma;Erythromma viridulum;Italy;GenBank;-;MT298455  
 Odonata;Coenagrionidae;Ischnura;Ischnura genei;Italy;GenBank;-;MT298470  
 Odonata;Coenagrionidae;Ischnura;Ischnura genei;Italy;GenBank;-;MT298471  
 Odonata;Coenagrionidae;Ischnura;Ischnura genei;Italy;GenBank;-;MT298472  
 Odonata;Lestidae;Lestes;Lestes barbarus;Italy;GenBank;-;MT298481  
 Odonata;Libellulidae;Libellula;Libellula fulva;Italy;Bold;ZPL0535-20;MT298514  
 Odonata;Libellulidae;Orthetrum;Orthetrum coeruleus;Italy;GenBank;-;MT298576  
 Odonata;Libellulidae;Orthetrum;Orthetrum coeruleus;Italy;GenBank;-;MT298579  
 Odonata;Corduliidae;Somatochlora;Somatochlora flavomaculata;Italy;GenBank;-;MT298616  
 Odonata;Libellulidae;Sympetrum;Sympetrum fonscolombii;Italy;GenBank;-;MT298652  
 Odonata;Libellulidae;Sympetrum;Sympetrum fonscolombii;Italy;GenBank;-;MT298653  
 Odonata;Libellulidae;Sympetrum;Sympetrum meridionale;Italy;GenBank;-;MT298655  
 Odonata;Cordulegasteridae;Cordulegaster;Cordulegaster heros;Austria;GenBank;-;MW490316  
 Odonata;Cordulegasteridae;Cordulegaster;Cordulegaster heros;Austria;GenBank;-;MW490369  
 Odonata;Coenagrionidae;Erythromma;Erythromma najas;Finland;GenBank;-;MZ657877  
 Odonata;Aeshnidae;Aeshna;Aeshna mixta;Russia;Bold;GBMNF49890-22;OM089771

Odonata;Aeshnidae;Aeshna;Aeshna mixta;Russia;GenBank;-;OM089772  
 Odonata;Aeshnidae;Aeshna;Aeshna mixta;Russia;Bold;GBMNF49891-22;OM089773  
 Odonata;Aeshnidae;Aeshna;Aeshna mixta;Russia;GenBank;-;OM089774  
 Odonata;Aeshnidae;Aeshna;Aeshna mixta;Russia;GenBank;-;OM089775  
 Odonata;Aeshnidae;Aeshna;Aeshna mixta;Russia;Bold;GBMNF49887-22;OM089776  
 Odonata;Aeshnidae;Aeshna;Aeshna affinis;Austria;Bold;AODON115-20;-  
 Odonata;Aeshnidae;Aeshna;Aeshna cyanea;Austria;Bold;AODON103-20;-  
 Odonata;Corduliidae;Cordulia;Cordulia aenea;Austria;Bold;AODON002-20;-  
 Odonata;Aeshnidae;Anax;Anax imperator;United Kingdom;Bold;ANBIO100-19;-  
 Odonata;Calopterygidae;Calopteryx;Calopteryx splendens;Austria;Bold;AODON451-20;-  
 Odonata;Calopterygidae;Calopteryx;Calopteryx virgo;Austria;Bold;AODON014-20;-  
 Odonata;Coenagrionidae;Coenagrion;Coenagrion puella;United Kingdom;Bold;ANBIO202-19;-  
 Odonata;Coenagrionidae;Coenagrion;Coenagrion pulchellum;Austria;Bold;AODON004-20;-  
 Odonata;Lestidae;Lestes;Lestes sponsa;Austria;Bold;AODON117-20;-  
 Odonata;Coenagrionidae;Enallagma;Enallagma cyathigerum;Austria;Bold;AODON025-20;-  
 Odonata;Coenagrionidae;Erythromma;Erythromma najas;Austria;Bold;AODON032-20;-  
 Odonata;Gomphidae;Gomphus;Gomphus vulgatissimus;Austria;Bold;AODON436-20;-  
 Odonata;Coenagrionidae;Ischnura;Ischnura elegans;United Kingdom;Bold;ANBIO150-19;-  
 Odonata;Coenagrionidae;Ischnura;Ischnura elegans;United Kingdom;Bold;ANBIO203-19;-  
 Odonata;Coenagrionidae;Ischnura;Ischnura elegans;United Kingdom;Bold;ANBIO195-19;-  
 Odonata;Libellulidae;Libellula;Libellula depressa;United Kingdom;Bold;ANBIO098-19;-  
 Odonata;Lestidae;Sympecma;Sympecma fusca;Austria;Bold;AODON006-20;-  
 Odonata;Libellulidae;Libellula;Libellula quadrimaculata;Austria;Bold;AODON001-20;-  
 Odonata;Libellulidae;Orthetrum;Orthetrum brunneum;Austria;Bold;AODON454-20;-  
 Odonata;Libellulidae;Orthetrum;Orthetrum cancellatum;Austria;Bold;AODON102-20;-  
 Odonata;Coenagrionidae;Pyrrhosoma;Pyrrhosoma nymphula;Austria;Bold;AODON003-20;-  
 Odonata;Libellulidae;Sympetrum;Sympetrum striolatum;United Kingdom;Bold;ANBIO101-19;-  
 Odonata;Libellulidae;Sympetrum;Sympetrum striolatum;Austria;Bold;AODON139-20;-  
 Coleoptera;Lucanidae;Platycerus;Platycerus caprea;Russia;GenBank;-;AB481434  
 Coleoptera;Lucanidae;Platycerus;Platycerus caraboides;France;GenBank;-;AB481437  
 Coleoptera;Ciidae;Cis;Cis setiger;France;GenBank;-;FM877939  
 Coleoptera;Ciidae;Sulcacis;Sulcacis affinis;Germany;GenBank;-;FM877947  
 Coleoptera;Curculionidae;Onyxacalles;Onyxacalles pyrenaeus;France;GenBank;-;GU981470  
 Coleoptera;Curculionidae;Kyklioacalles;Kyklioacalles punctaticollis;France;Bold;GBCL11317-12;GU981489  
 Coleoptera;Curculionidae;Kyklioacalles;Kyklioacalles roboris;Andorra;GenBank;-;GU981498  
 Coleoptera;Curculionidae;Onyxacalles;Onyxacalles pyrenaeus;France;GenBank;-;GU987762  
 Coleoptera;Curculionidae;Acalloccrates;Acalloccrates denticollis;Greece;GenBank;-;GU987875  
 Coleoptera;Curculionidae;Kyklioacalles;Kyklioacalles punctaticollis;France;Bold;GBMIN29889-13;GU987893  
 Coleoptera;Curculionidae;Dichromacalles;Dichromacalles rolletii;France;GenBank;-;GU987901  
 Coleoptera;Pyrochroidae;Pyrochroa;Pyrochroa serraticornis;United Kingdom;Bold;SPMIS348-22;HG995162.1  
 Coleoptera;Buprestidae;Agrilus;Agrilus graminis;Spain;GenBank;-;HM386452  
 Coleoptera;Buprestidae;Agrilus;Agrilus viridis;France;GenBank;-;HM417706  
 Coleoptera;Buprestidae;Agrilus;Agrilus biguttatus;Greece;GenBank;-;HM417714  
 Coleoptera;Buprestidae;Anthaxia;Anthaxia quadripunctata;Finland;GenBank;-;HM909032  
 Coleoptera;Cerambycidae;Callidium;Callidium aeneum;Finland;GenBank;-;HM909033  
 Coleoptera;Cerambycidae;Paracorymbia;Paracorymbia maculicornis;Finland;GenBank;-;HM909037  
 Coleoptera;Pyrochroidae;Pyrochroa;Pyrochroa coccinea;Finland;GenBank;-;HM909042  
 Coleoptera;Latridiidae;Corticaria;Corticaria gibbosa;Finland;GenBank;-;HM909057  
 Coleoptera;Staphylinidae;Dinaraea;Dinaraea aequata;Finland;GenBank;-;HM909061  
 Coleoptera;Mycetophagidae;Litargus;Litargus connexus;Finland;GenBank;-;HM909071  
 Coleoptera;Mycetophagidae;Mycetophagus;Mycetophagus piceus;Finland;GenBank;-;HM909072  
 Coleoptera;Zopheridae;Bitoma;Bitoma crenata;Finland;GenBank;-;HM909091  
 Coleoptera;Tetratomidae;Tetratoma;Tetratoma fungorum;Finland;GenBank;-;HM909108  
 Coleoptera;Latridiidae;Corticaria;Corticaria abietorum;Finland;Bold;COLFA101-10;HQ559228  
 Coleoptera;Histeridae;Dendrophilus;Dendrophilus pygmaeus;Finland;GenBank;-;HQ559231  
 Coleoptera;Curculionidae;Trachodes;Trachodes hispidus;Finland;GenBank;-;HQ559236  
 Coleoptera;Cerambycidae;Aromia;Aromia moschata;Finland;GenBank;-;HQ559240  
 Coleoptera;Cerambycidae;Arhopalus;Arhopalus rusticus;Finland;GenBank;-;HQ559250  
 Coleoptera;Cerambycidae;Judolia;Judolia sexmaculata;Finland;GenBank;-;HQ559267  
 Coleoptera;Latridiidae;Melanophthalma;Melanophthalma curticolis;Germany;GenBank;-;HQ563322  
 Coleoptera;Nitidulidae;Epuraea;Epuraea melanocephala;Germany;GenBank;-;HQ948248  
 Coleoptera;Lymexylidae;Elateroides;Elateroides dermestoides;Germany;Bold;FBCOC023-10;HQ954462  
 Coleoptera;Buprestidae;Anthaxia;Anthaxia helvetica;Germany;GenBank;-;HQ954476  
 Coleoptera;Lymexylidae;Elateroides;Elateroides dermestoides;Germany;Bold;FBCOC118-10;HQ954546  
 Coleoptera;Buprestidae;Agrilus;Agrilus viridis;Germany;GenBank;-;HQ954579  
 Coleoptera;Cerambycidae;Spondylis;Spondylis buprestoides;Finland;GenBank;-;JN284885  
 Coleoptera;Ptiliidae;Ptenidium;Ptenidium pusillum;Finland;GenBank;-;JN297959  
 Coleoptera;Ciidae;Cis;Cis bidentatus;Finland;GenBank;-;JN297960  
 Coleoptera;Cerambycidae;Herophila;Herophila tristis;Italy;GenBank;-;JX969627  
 Coleoptera;Scarabaeidae;Calicnemis;Calicnemis sardiniensis;Italy;GenBank;-;KJ492956  
 Coleoptera;Buprestidae;Agrilus;Agrilus betuleti;Finland;GenBank;-;KJ768192  
 Coleoptera;Curculionidae;Dichromacalles;Dichromacalles rolletii;Greece;GenBank;-;KJ867575  
 Coleoptera;Oedemeridae;Chrysanthia;Chrysanthia viridissima;Finland;GenBank;-;KJ961741  
 Coleoptera;Nitidulidae;Epuraea;Epuraea placida;Finland;GenBank;-;KJ961742  
 Coleoptera;Mycetophagidae;Typhaea;Typhaea stercorea;Finland;GenBank;-;KJ961744

Coleoptera;Staphylinidae;Leptusa;Leptusa fumida;Finland;GenBank;-;KJ961779  
 Coleoptera;Anthribidae;Dissoleucas;Dissoleucas niveirostris;Finland;GenBank;-;KJ961782  
 Coleoptera;Ciidae;Cis;Cis boleti;Finland;GenBank;-;KJ961832  
 Coleoptera;Elateridae;Ampedus;Ampedus erythrogonus;Finland;GenBank;-;KJ961839  
 Coleoptera;Ptiliidae;Ptenidium;Ptenidium punctatum;Finland;GenBank;-;KJ961842  
 Coleoptera;Cerambycidae;Pachyta;Pachyta quadrimaculata;Finland;GenBank;-;KJ961852  
 Coleoptera;Ptinidae;Cacotemnus;Cacotemnus rufipes;Finland;GenBank;-;KJ961900  
 Coleoptera;Mycetaeidae;Mycetaea;Mycetaea subterranea;Sweden;GenBank;-;KJ961953  
 Coleoptera;Monotomidae;Monotoma;Monotoma picipes;Finland;GenBank;-;KJ961980  
 Coleoptera;Cerambycidae;Gauromes;Gauromes virginea;Finland;GenBank;-;KJ961983  
 Coleoptera;Ptinidae;Callidium;Callidium aeneum;Finland;GenBank;-;KJ962004  
 Coleoptera;Tenebrionidae;Mycetochara;Mycetochara axillaris;Finland;GenBank;-;KJ962021  
 Coleoptera;Tenebrionidae;Diaperis;Diaperis boleti;Finland;GenBank;-;KJ962024  
 Coleoptera;Ptiliidae;Ptenidium;Ptenidium formicetorum;Sweden;GenBank;-;KJ962041  
 Coleoptera;Monotomidae;Rhizophagus;Rhizophagus bipustulatus;Finland;GenBank;-;KJ962045  
 Coleoptera;Zopheridae;Bitoma;Bitoma crenata;Finland;GenBank;-;KJ962118  
 Coleoptera;Staphylinidae;Scaphidium;Scaphidium quadrimaculatum;Finland;GenBank;-;KJ962145  
 Coleoptera;Clambidae;Clambus;Clambus armadillo;Finland;Bold;COLFC444-12;KJ962157  
 Coleoptera;Zopheridae;Bitoma;Bitoma crenata;Finland;GenBank;-;KJ962176  
 Coleoptera;Latridiidae;Corticaria;Corticaria crenulata;Finland;GenBank;-;KJ962232  
 Coleoptera;Ciidae;Cis;Cis boleti;Finland;GenBank;-;KJ962322  
 Coleoptera;Cerambycidae;Pachyta;Pachyta quadrimaculata;Finland;GenBank;-;KJ962331  
 Coleoptera;Nitidulidae;Epuraea;Epuraea unicolor;Finland;GenBank;-;KJ962357  
 Coleoptera;Tetratomidae;Hallomenus;Hallomenus binotatus;Finland;GenBank;-;KJ962378  
 Coleoptera;Cerambycidae;Molorchus;Molorchus minor;Finland;GenBank;-;KJ962384  
 Coleoptera;Leiodidae;Agathidium;Agathidium seminulum;Finland;GenBank;-;KJ962411  
 Coleoptera;Ariidae;Anidorus;Anidorus nigrinus;Finland;GenBank;-;KJ962434  
 Coleoptera;Cerambycidae;Gauromes;Gauromes virginea;Finland;GenBank;-;KJ962469  
 Coleoptera;Ptiliidae;Ptenidium;Ptenidium formicetorum;Sweden;GenBank;-;KJ962489  
 Coleoptera;Ptiliidae;Ptilium;Ptilium exaratum;Finland;GenBank;-;KJ962499  
 Coleoptera;Latridiidae;Corticaria;Corticaria gibbosa;Finland;GenBank;-;KJ962500  
 Coleoptera;Buprestidae;Buprestis;Buprestis haemorrhoidalis;Finland;GenBank;-;KJ962529  
 Coleoptera;Buprestidae;Phaenops;Phaenops cyanea;Finland;GenBank;-;KJ962530  
 Coleoptera;Sphindidae;Sphindus;Sphindus dubius;Finland;GenBank;-;KJ962540  
 Coleoptera;Staphylinidae;Trimium;Trimium brevicorne;Finland;GenBank;-;KJ962546  
 Coleoptera;Cerambycidae;Rutpela;Rutpela maculata;Finland;GenBank;-;KJ962567  
 Coleoptera;Ptinidae;Anobium;Anobium punctatum;Finland;GenBank;-;KJ962574  
 Coleoptera;Buprestidae;Phaenops;Phaenops cyanea;Finland;GenBank;-;KJ962596  
 Coleoptera;Nitidulidae;Cychramus;Cychramus luteus;Finland;GenBank;-;KJ962607  
 Coleoptera;Mycetophagidae;Litargus;Litargus connexus;Finland;GenBank;-;KJ962610  
 Coleoptera;Buprestidae;Phaenops;Phaenops cyanea;Finland;GenBank;-;KJ962616  
 Coleoptera;Tenebrionidae;Diaperis;Diaperis boleti;Finland;GenBank;-;KJ962624  
 Coleoptera;Scarabaeidae;Protaetia;Protaetia cuprea;Finland;GenBank;-;KJ962659  
 Coleoptera;Buprestidae;Anthaxia;Anthaxia quadripunctata;Finland;GenBank;-;KJ962721  
 Coleoptera;Cerambycidae;Callidium;Callidium violaceum;Finland;GenBank;-;KJ962734  
 Coleoptera;Ptinidae;Ptinomorphus;Ptinomorphus imperialis;Finland;GenBank;-;KJ962811  
 Coleoptera;Pyrochroidae;Schizotus;Schizotus pectinicornis;Finland;GenBank;-;KJ962829  
 Coleoptera;Cerambycidae;Stenurella;Stenurella melanura;Finland;GenBank;-;KJ962863  
 Coleoptera;Mycetophagidae;Typhaea;Typhaea stercorea;Finland;GenBank;-;KJ962864  
 Coleoptera;Ptinidae;Hadrobregmus;Hadrobregmus pertinax;Finland;GenBank;-;KJ962879  
 Coleoptera;Scarabaeidae;Trichius;Trichius fasciatus;Finland;GenBank;-;KJ962927  
 Coleoptera;Pyrochroidae;Schizotus;Schizotus pectinicornis;Finland;GenBank;-;KJ962969  
 Coleoptera;Latridiidae;Corticaria;Corticaria impressa;Finland;GenBank;-;KJ962971  
 Coleoptera;Cerambycidae;Gauromes;Gauromes virginea;Finland;GenBank;-;KJ963065  
 Coleoptera;Cerambycidae;Paracorymbia;Paracorymbia maculicornis;Finland;GenBank;-;KJ963072  
 Coleoptera;Mycetaeidae;Mycetaea;Mycetaea subterranea;Sweden;GenBank;-;KJ963108  
 Coleoptera;Nitidulidae;Glischrochilus;Glischrochilus hortensis;Finland;GenBank;-;KJ963141  
 Coleoptera;Tenebrionidae;Pentaphyllus;Pentaphyllus testaceus;Sweden;GenBank;-;KJ963147  
 Coleoptera;Cerambycidae;Leiopus;Leiopus nebulosus;Finland;GenBank;-;KJ963149  
 Coleoptera;Cerambycidae;Rhyncolus;Rhyncolus ater;Finland;GenBank;-;KJ963150  
 Coleoptera;Silvanidae;Silvanus;Silvanus bidentatus;Finland;GenBank;-;KJ963197  
 Coleoptera;Cryptophagidae;Atomaria;Atomaria nigrirostris;Finland;GenBank;-;KJ963261  
 Coleoptera;Staphylinidae;Phloeonomus;Phloeonomus punctipennis;Finland;GenBank;-;KJ963293  
 Coleoptera;Cerambycidae;Rhagium;Rhagium mordax;Finland;GenBank;-;KJ963320  
 Coleoptera;Endomychidae;Endomychus;Endomychus coccineus;Finland;GenBank;-;KJ963347  
 Coleoptera;Eucnemidae;Melasis;Melasis buprestoides;Sweden;GenBank;-;KJ963367  
 Coleoptera;Scraptiidae;Anaspis;Anaspis rufilabris;Finland;GenBank;-;KJ963370  
 Coleoptera;Dermaptera;Ctesias;Ctesias serra;Finland;GenBank;-;KJ963385  
 Coleoptera;Latridiidae;Corticaria;Corticaria elongata;Finland;GenBank;-;KJ963401  
 Coleoptera;Cerambycidae;Gauromes;Gauromes virginea;Finland;GenBank;-;KJ963449  
 Coleoptera;Corylophidae;Orthoperus;Orthoperus corticalis;Finland;GenBank;-;KJ963453  
 Coleoptera;Buprestidae;Anthaxia;Anthaxia quadripunctata;Finland;GenBank;-;KJ963461  
 Coleoptera;Buprestidae;Buprestis;Buprestis octoguttata;Finland;GenBank;-;KJ963469  
 Coleoptera;Leiodidae;Anisotoma;Anisotoma axillaris;Finland;GenBank;-;KJ963521  
 Coleoptera;Curculionidae;Pissodes;Pissodes pini;Finland;GenBank;-;KJ963528  
 Coleoptera;Nitidulidae;Epuraea;Epuraea pallelescens;Finland;GenBank;-;KJ963551  
 Coleoptera;Tetratomidae;Hallomenus;Hallomenus axillaris;Finland;GenBank;-;KJ963661  
 Coleoptera;Mordellidae;Mordellistena;Mordellistena humeralis;Finland;GenBank;-;KJ963672

Coleoptera;Tenebrionidae;Bolitophagus;Bolitophagus reticulatus;Estonia;GenBank;-;KJ963690  
 Coleoptera;Ptinidae;Dorcatoma;Dorcatoma chrysomelina;Sweden;GenBank;-;KJ963701  
 Coleoptera;Cerambycidae;Stenurella;Stenurella melanura;Finland;GenBank;-;KJ963709  
 Coleoptera;Erotylidae;Triplax;Triplax rufipes;Finland;GenBank;-;KJ963715  
 Coleoptera;Staphylinidae;Scaphidium;Scaphidium quadrimaculatum;Finland;GenBank;-;KJ963785  
 Coleoptera;Ptinidae;Dorcatoma;Dorcatoma chrysomelina;Sweden;GenBank;-;KJ963787  
 Coleoptera;Ciidae;Sulcacis;Sulcacis fronticornis;Finland;GenBank;-;KJ963808  
 Coleoptera;Curculionidae;Trachodes;Trachodes hispidus;Finland;GenBank;-;KJ963848  
 Coleoptera;Elateridae;Melanotus;Melanotus villosus;Estonia;GenBank;-;KJ963853  
 Coleoptera;Mycetophagidae;Litargus;Litargus connexus;Finland;GenBank;-;KJ963855  
 Coleoptera;Cerambycidae;Aromia;Aromia moschata;Finland;GenBank;-;KJ963928  
 Coleoptera;Aderidae;Anidorus;Anidorus nigrinus;Finland;GenBank;-;KJ963945  
 Coleoptera;Ptiliidae;Ptilium;Ptilium exaratum;Finland;GenBank;-;KJ963999  
 Coleoptera;Sphindidae;Sphindus;Sphindus dubius;Finland;GenBank;-;KJ964012  
 Coleoptera;Latridiidae;Corticaria;Corticaria impressa;Finland;GenBank;-;KJ964037  
 Coleoptera;Buprestidae;Anthaxia;Anthaxia quadripunctata;Finland;GenBank;-;KJ964057  
 Coleoptera;Nitidulidae;Epuraea;Epuraea variegata;Finland;GenBank;-;KJ964076  
 Coleoptera;Cerambycidae;Stenurella;Stenurella melanura;Finland;GenBank;-;KJ964096  
 Coleoptera;Latridiidae;Corticaria;Corticaria gibbosa;Finland;GenBank;-;KJ964106  
 Coleoptera;Curculionidae;Rhyncolus;Rhyncolus ater;Finland;GenBank;-;KJ964123  
 Coleoptera;Latridiidae;Cartodere;Cartodere nodifer;Finland;GenBank;-;KJ964161  
 Coleoptera;Scraptiidae;Anaspis;Anaspis rufilabris;Finland;GenBank;-;KJ964162  
 Coleoptera;Ptiliidae;Ptilinus;Ptilinus fuscus;Finland;GenBank;-;KJ964190  
 Coleoptera;Erotylidae;Triplax;Triplax aenea;Finland;GenBank;-;KJ964262  
 Coleoptera;Monotomidae;Rhizophagus;Rhizophagus bipustulatus;Finland;GenBank;-;KJ964265  
 Coleoptera;Cerambycidae;Tetropium;Tetropium fuscum;Finland;GenBank;-;KJ964282  
 Coleoptera;Cerambycidae;Pogonocherus;Pogonocherus hispidus;Finland;GenBank;-;KJ964297  
 Coleoptera;Elateridae;Ampedus;Ampedus pomorum;Estonia;GenBank;-;KJ964300  
 Coleoptera;Elateridae;Ampedus;Ampedus balteatus;Finland;GenBank;-;KJ964318  
 Coleoptera;Mycetophagidae;Litargus;Litargus connexus;Finland;GenBank;-;KJ964319  
 Coleoptera;Cerambycidae;Pogonocherus;Pogonocherus fasciculatus;Finland;GenBank;-;KJ964368  
 Coleoptera;Erotylidae;Tritoma;Tritoma bipustulata;Finland;GenBank;-;KJ964373  
 Coleoptera;Staphylinidae;Homalota;Homalota plana;Finland;GenBank;-;KJ964375  
 Coleoptera;Cerambycidae;Arhopalus;Arhopalus rusticus;Finland;GenBank;-;KJ964380  
 Coleoptera;Cerambycidae;Gaurotus;Gaurotus virginea;Finland;GenBank;-;KJ964393  
 Coleoptera;Nitidulidae;Glischrochilus;Glischrochilus hortensis;Finland;GenBank;-;KJ964414  
 Coleoptera;Elateridae;Ampedus;Ampedus balteatus;Finland;GenBank;-;KJ964419  
 Coleoptera;Curculionidae;Pityogenes;Pityogenes bidentatus;Finland;GenBank;-;KJ964432  
 Coleoptera;Cerylonidae;Cerylon;Cerylon histeroideus;Finland;GenBank;-;KJ964507  
 Coleoptera;Cerambycidae;Tetropium;Tetropium castaneum;Finland;GenBank;-;KJ964513  
 Coleoptera;Staphylinidae;Atrecus;Atrecus affinis;Finland;GenBank;-;KJ964531  
 Coleoptera;Cerambycidae;Spondylis;Spondylis buprestoides;Finland;GenBank;-;KJ964556  
 Coleoptera;Lycidae;Dictyoptera;Dictyoptera aurora;Finland;GenBank;-;KJ964562  
 Coleoptera;Cerambycidae;Leiopus;Leiopus nebulosus;Finland;GenBank;-;KJ964583  
 Coleoptera;Sphindidae;Aspidiphorus;Aspidiphorus orbiculatus;Finland;GenBank;-;KJ964585  
 Coleoptera;Nitidulidae;Epuraea;Epuraea pygmaea;Finland;GenBank;-;KJ964595  
 Coleoptera;Mycetophagidae;Litargus;Litargus connexus;Finland;GenBank;-;KJ964606  
 Coleoptera;Erotylidae;Tritoma;Tritoma bipustulata;Finland;GenBank;-;KJ964727  
 Coleoptera;Melyridae;Dasytes;Dasytes plumbeus;Finland;GenBank;-;KJ964773  
 Coleoptera;Oedemeridae;Chrysanthia;Chrysanthia viridissima;Sweden;GenBank;-;KJ964774  
 Coleoptera;Cerambycidae;Pachyta;Pachyta quadrimaculata;Finland;GenBank;-;KJ964790  
 Coleoptera;Cerambycidae;Phymatodes;Phymatodes testaceus;Finland;GenBank;-;KJ964796  
 Coleoptera;Ptinidae;Hadrobregmus;Hadrobregmus pertinax;Finland;GenBank;-;KJ964816  
 Coleoptera;Nitidulidae;Epuraea;Epuraea unicolor;Finland;GenBank;-;KJ964833  
 Coleoptera;Mycetophagidae;Mycetophagus;Mycetophagus populi;Finland;GenBank;-;KJ964858  
 Coleoptera;Buprestidae;Dicerca;Dicerca moesta;Finland;GenBank;-;KJ964870  
 Coleoptera;Buprestidae;Dicerca;Dicerca moesta;Finland;GenBank;-;KJ964877  
 Coleoptera;Nitidulidae;Epuraea;Epuraea variegata;Estonia;GenBank;-;KJ964916  
 Coleoptera;Scarabaeidae;Trichius;Trichius fasciatus;Finland;GenBank;-;KJ964922  
 Coleoptera;Staphylinidae;Quedius;Quedius brevicornis;Finland;GenBank;-;KJ964951  
 Coleoptera;Elateridae;Ampedus;Ampedus pomonae;Finland;GenBank;-;KJ964958  
 Coleoptera;Cerambycidae;Saperda;Saperda carcharias;Finland;GenBank;-;KJ964971  
 Coleoptera;Curculionidae;Ips;Ips acuminatus;Finland;GenBank;-;KJ965012  
 Coleoptera;Cerambycidae;Monochamus;Monochamus sutor;Finland;GenBank;-;KJ965030  
 Coleoptera;Staphylinidae;Quedius;Quedius scitus;Finland;GenBank;-;KJ965037  
 Coleoptera;Cerambycidae;Molorchus;Molorchus minor;Finland;GenBank;-;KJ965045  
 Coleoptera;Cerambycidae;Stenurella;Stenurella melanura;Finland;GenBank;-;KJ965077  
 Coleoptera;Aderidae;Anidorus;Anidorus nigrinus;Finland;GenBank;-;KJ965104  
 Coleoptera;Endomychidae;Endomychus;Endomychus coccineus;Finland;GenBank;-;KJ965118  
 Coleoptera;Cerambycidae;Stictoleptura;Stictoleptura rubra;Finland;GenBank;-;KJ965133  
 Coleoptera;Salpingidae;Salpingus;Salpingus planirostris;Finland;GenBank;-;KJ965219  
 Coleoptera;Curculionidae;Cryptorhynchus;Cryptorhynchus lapathi;Finland;GenBank;-;KJ965256  
 Coleoptera;Tenebrionidae;Pseudocistela;Pseudocistela ceramboides;Finland;GenBank;-;KJ965267  
 Coleoptera;Staphylinidae;Quedius;Quedius cruentus;Finland;GenBank;-;KJ965301  
 Coleoptera;Leiodidae;Anisotoma;Anisotoma orbicularis;Finland;GenBank;-;KJ965302  
 Coleoptera;Buprestidae;Dicerca;Dicerca moesta;Finland;GenBank;-;KJ965352  
 Coleoptera;Cerambycidae;Pachyta;Pachyta quadrimaculata;Finland;GenBank;-;KJ965366  
 Coleoptera;Elateridae;Denticollis;Denticollis linearis;Finland;GenBank;-;KJ965420

Coleoptera;Scraptiidae;Anaspis;Anaspis rufilabris;Finland;GenBank;-;KJ965432  
 Coleoptera;Elateridae;Ampedus;Ampedus balteatus;Finland;GenBank;-;KJ965448  
 Coleoptera;Cerambycidae;Saperda;Saperda carcharias;Finland;GenBank;-;KJ965483  
 Coleoptera;Staphylinidae;Dinaraea;Dinaraea aequata;Finland;GenBank;-;KJ965484  
 Coleoptera;Mordellidae;Mordellochroa;Mordellochroa abdominalis;Finland;GenBank;-;KJ965600  
 Coleoptera;Curculionidae;Cryphalus;Cryphalus saltuarius;Finland;GenBank;-;KJ965606  
 Coleoptera;Cerambycidae;Allosterna;Allosterna tabacicolor;Finland;GenBank;-;KJ965615  
 Coleoptera;Cerambycidae;Tetrops;Tetrops starkii;Estonia;GenBank;-;KJ965662  
 Coleoptera;Nitidulidae;Epuraea;Epuraea marseuli;Finland;GenBank;-;KJ965797  
 Coleoptera;Staphylinidae;Phloeostiba;Phloeostiba plana;Finland;GenBank;-;KJ965808  
 Coleoptera;Staphylinidae;Atheta;Atheta picipes;Finland;GenBank;-;KJ965885  
 Coleoptera;Latridiidae;Cartodere;Cartodere constricta;Finland;GenBank;-;KJ965886  
 Coleoptera;Latridiidae;Cartodere;Cartodere constricta;Finland;GenBank;-;KJ965912  
 Coleoptera;Oedemeridae;Chrysanthia;Chrysanthia viridissima;Finland;GenBank;-;KJ965923  
 Coleoptera;Ciidae;Cis;Cis glabratus;Estonia;GenBank;-;KJ965985  
 Coleoptera;Elateridae;Stenagostus;Stenagostus rhombeus;Sweden;GenBank;-;KJ966071  
 Coleoptera;Staphylinidae;Phloeostiba;Phloeostiba plana;Finland;GenBank;-;KJ966112  
 Coleoptera;Staphylinidae;Homalota;Homalota plana;Finland;GenBank;-;KJ966141  
 Coleoptera;Erotylidae;Dacne;Dacne bipustulata;Finland;GenBank;-;KJ966156  
 Coleoptera;Staphylinidae;Sepedophilus;Sepedophilus testaceus;Finland;GenBank;-;KJ966168  
 Coleoptera;Ciidae;Cis;Cis dentatus;Finland;GenBank;-;KJ966197  
 Coleoptera;Rhadalidae;Aplocnemus;Aplocnemus nigricornis;Finland;GenBank;-;KJ966215  
 Coleoptera;Cerambycidae;Stenurella;Stenurella melanura;Finland;GenBank;-;KJ966244  
 Coleoptera;Erotylidae;Triplax;Triplax aenea;Finland;GenBank;-;KJ966247  
 Coleoptera;Curculionidae;Trachodes;Trachodes hispidus;Finland;GenBank;-;KJ966283  
 Coleoptera;Elateridae;Melanotus;Melanotus villosus;Estonia;GenBank;-;KJ966292  
 Coleoptera;Erotylidae;Dacne;Dacne bipustulata;Finland;GenBank;-;KJ966311  
 Coleoptera;Cerambycidae;Paracorymbia;Paracorymbia maculicornis;Finland;GenBank;-;KJ966333  
 Coleoptera;Cerambycidae;Hylotrupes;Hylotrupes bajulus;Finland;GenBank;-;KJ966347  
 Coleoptera;Mycetophagidae;Mycetophagus;Mycetophagus quadripustulatus;Finland;GenBank;-;KJ966425  
 Coleoptera;Erotylidae;Dacne;Dacne bipustulata;Finland;GenBank;-;KJ966473  
 Coleoptera;Staphylinidae;Quedius;Quedius brevicornis;Finland;GenBank;-;KJ966479  
 Coleoptera;Scraptiidae;Anaspis;Anaspis rufilabris;Finland;GenBank;-;KJ966509  
 Coleoptera;Lucanidae;Sinodendron;Sinodendron cylindricum;Finland;GenBank;-;KJ966511  
 Coleoptera;Elateridae;Ampedus;Ampedus pomorum;Finland;GenBank;-;KJ966520  
 Coleoptera;Curculionidae;Rhyncolus;Rhyncolus ater;Finland;GenBank;-;KJ966539  
 Coleoptera;Cerambycidae;Anoploclera;Anoploclera sexguttata;Sweden;GenBank;-;KJ966542  
 Coleoptera;Eucnemidae;Melasis;Melasis buprestoides;Sweden;GenBank;-;KJ966606  
 Coleoptera;Cerambycidae;Tetropium;Tetropium castaneum;Finland;GenBank;-;KJ966635  
 Coleoptera;Ciidae;Cis;Cis castaneus;Finland;GenBank;-;KJ966781  
 Coleoptera;Buprestidae;Phaenops;Phaenops cyanea;Finland;GenBank;-;KJ966789  
 Coleoptera;Cerambycidae;Pachyta;Pachyta quadrimaculata;Finland;GenBank;-;KJ966803  
 Coleoptera;Erotylidae;Dacne;Dacne bipustulata;Finland;GenBank;-;KJ966806  
 Coleoptera;Staphylinidae;Quedius;Quedius brevicornis;Finland;GenBank;-;KJ966821  
 Coleoptera;Nitidulidae;Cychramus;Cychramus luteus;Finland;GenBank;-;KJ966832  
 Coleoptera;Elateridae;Ampedus;Ampedus sanguinolentus;Finland;GenBank;-;KJ966894  
 Coleoptera;Elateridae;Ampedus;Ampedus pomorum;Finland;GenBank;-;KJ966895  
 Coleoptera;Cerambycidae;Saperda;Saperda carcharias;Finland;GenBank;-;KJ966951  
 Coleoptera;Oedemeridae;Chrysanthia;Chrysanthia viridissima;Finland;GenBank;-;KJ966956  
 Coleoptera;Scraptiidae;Anaspis;Anaspis rufilabris;Finland;GenBank;-;KJ966995  
 Coleoptera;Cerambycidae;Leiopus;Leiopus nebulosus;Finland;GenBank;-;KJ967008  
 Coleoptera;Staphylinidae;Atheta;Atheta picipes;Finland;GenBank;-;KJ967025  
 Coleoptera;Silvanidae;Silvanoprus;Silvanoprus fagi;Finland;GenBank;-;KJ967029  
 Coleoptera;Staphylinidae;Quedius;Quedius scitus;Finland;GenBank;-;KJ967052  
 Coleoptera;Tenebrionidae;Bolitophagus;Bolitophagus reticulatus;Finland;GenBank;-;KJ967060  
 Coleoptera;Tenebrionidae;Bolitophagus;Bolitophagus reticulatus;Finland;GenBank;-;KJ967071  
 Coleoptera;Histeridae;Abraeus;Abraeus perpusillus;Sweden;GenBank;-;KJ967075  
 Coleoptera;Cerambycidae;Stenurella;Stenurella melanura;Finland;GenBank;-;KJ967156  
 Coleoptera;Latridiidae;Corticaria;Corticaria elongata;Finland;GenBank;-;KJ967166  
 Coleoptera;Cerambycidae;Tetrops;Tetrops praeustus;Sweden;GenBank;-;KJ967190  
 Coleoptera;Scarabaeidae;Protaetia;Protaetia cuprea;Finland;GenBank;-;KJ967217  
 Coleoptera;Alexiidae;Sphaerosoma;Sphaerosoma pilosum;Finland;GenBank;-;KJ967241  
 Coleoptera;Cerambycidae;Tetrops;Tetrops praeustus;Finland;GenBank;-;KJ967255  
 Coleoptera;Scraptiidae;Anaspis;Anaspis rufilabris;Finland;GenBank;-;KJ967269  
 Coleoptera;Cerambycidae;Stictoleptura;Stictoleptura rubra;Finland;GenBank;-;KJ967273  
 Coleoptera;Cerambycidae;Paracorymbia;Paracorymbia maculicornis;Finland;GenBank;-;KJ967279  
 Coleoptera;Cerambycidae;Leiopus;Leiopus nebulosus;Finland;GenBank;-;KJ967320  
 Coleoptera;Staphylinidae;Tyrus;Tyrus mucronatus;Finland;GenBank;-;KJ967356  
 Coleoptera;Histeridae;Hololepta;Hololepta plana;Finland;GenBank;-;KJ967462  
 Coleoptera;Cerambycidae;Monochamus;Monochamus galloprovincialis;Finland;GenBank;-;KJ967472  
 Coleoptera;Cerambycidae;Allosterna;Allosterna tabacicolor;Finland;GenBank;-;KJ967479  
 Coleoptera;Elateridae;Ampedus;Ampedus balteatus;Finland;GenBank;-;KJ967483  
 Coleoptera;Cerambycidae;Molorchus;Molorchus minor;Finland;GenBank;-;KJ967492  
 Coleoptera;Monotomidae;Monotoma;Monotoma picipes;Finland;GenBank;-;KJ967512  
 Coleoptera;Curculionidae;Rhyncolus;Rhyncolus ater;Finland;GenBank;-;KJ967520  
 Coleoptera;Tenebrionidae;Pentaphyllus;Pentaphyllus testaceus;France;GenBank;-;KM285784  
 Coleoptera;Buprestidae;Anthaxia;Anthaxia umbellatarum;France;GenBank;-;KM285798  
 Coleoptera;Melandryidae;Conopalpus;Conopalpus brevicollis;France;GenBank;-;KM285804



Coleoptera;Pyrochroidae;Pyrochroa;Pyrochroa serraticornis;France;GenBank;-;KM285809  
 Coleoptera;Mycetophagidae;Mycetophagus;Mycetophagus piceus;France;GenBank;-;KM285810  
 Coleoptera;Oedemeridae;Ischnomera;Ischnomera cyanea;France;GenBank;-;KM285824  
 Coleoptera;Cerambycidae;Grammoptera;Grammoptera ustulata;France;GenBank;-;KM285829  
 Coleoptera;Elateridae;Ampedus;Ampedus pomonae;France;GenBank;-;KM285831  
 Coleoptera;Anthribidae;Platyrhinus;Platyrhinus resinosus;France;GenBank;-;KM285849  
 Coleoptera;Ptinidae;Hadrobregmus;Hadrobregmus denticollis;France;GenBank;-;KM285862  
 Coleoptera;Cerambycidae;Phymatodes;Phymatodes rufipes;France;GenBank;-;KM285863  
 Coleoptera;Pyrochroidae;Pyrochroa;Pyrochroa coccinea;France;GenBank;-;KM285880  
 Coleoptera;Tenebrionidae;Bolitophagus;Bolitophagus reticulatus;France;GenBank;-;KM285900  
 Coleoptera;Ptinidae;Chrysobothris;Chrysobothris affinis;France;GenBank;-;KM285981  
 Coleoptera;Lymexylidae;Elateroides;Elateroides dermestoides;France;Bold;PSFOR283-13;KM285992  
 Coleoptera;Cerambycidae;Prionus;Prionus coriarius;France;GenBank;-;KM286000  
 Coleoptera;Cerambycidae;Mesosa;Mesosa nebulosa;France;GenBank;-;KM286019  
 Coleoptera;Cleridae;Opilo;Opilo mollis;France;GenBank;-;KM286038  
 Coleoptera;Mycetophagidae;Triphyllus;Triphyllus bicolor;France;GenBank;-;KM286043  
 Coleoptera;Cerambycidae;Exocentrus;Exocentrus adspersus;France;GenBank;-;KM286059  
 Coleoptera;Lycidae;Dictyoptera;Dictyoptera aurora;France;GenBank;-;KM286113  
 Coleoptera;Ptinidae;Dinoptera;Dinoptera collaris;France;GenBank;-;KM286140  
 Coleoptera;Zopheridae;Coxelus;Coxelus pictus;France;GenBank;-;KM286144  
 Coleoptera;Ptinidae;Hemicoelus;Hemicoelus canaliculatus;France;GenBank;-;KM286179  
 Coleoptera;Elateridae;Lacon;Lacon querceus;France;GenBank;-;KM286190  
 Coleoptera;Ptinidae;Xestobium;Xestobium rufovillosus;France;GenBank;-;KM286197  
 Coleoptera;Lymexylidae;Elateroides;Elateroides dermestoides;France;Bold;PSFOR1020-14;KM286217  
 Coleoptera;Cleridae;Thanasimus;Thanasimus femoralis;France;Bold;PSFOR628-13;KM286304  
 Coleoptera;Cerambycidae;Anoplodera;Anoplodera sexguttata;France;GenBank;-;KM286312  
 Coleoptera;Cerambycidae;Pyrrhidium;Pyrrhidium sanguineum;France;GenBank;-;KM286354  
 Coleoptera;Cerambycidae;Stenopterus;Stenopterus rufus;France;GenBank;-;KM286361  
 Coleoptera;Ptinidae;Ptilinus;Ptilinus pectinicornis;France;GenBank;-;KM286378  
 Coleoptera;Elateridae;Ampedus;Ampedus nigrinus;France;GenBank;-;KM286384  
 Coleoptera;Cleridae;Opilo;Opilo mollis;France;GenBank;-;KM286390  
 Coleoptera;Leiodidae;Agathidium;Agathidium atrum;Belgium;GenBank;-;KM439550  
 Coleoptera;Bostrichidae;Scobicia;Scobicia chevrieri;Slovenia;GenBank;-;KM440069  
 Coleoptera;Buprestidae;Agrilus;Agrilus viridis;Germany;GenBank;-;KM440395  
 Coleoptera;Cerambycidae;Stictoleptura;Stictoleptura cordigera;Greece;GenBank;-;KM441073  
 Coleoptera;Cerambycidae;Grammoptera;Grammoptera ustulata;Czech Republic;GenBank;-;KM443781  
 Coleoptera;Cerambycidae;Rutpela;Rutpela maculata;Slovenia;GenBank;-;KM444341  
 Coleoptera;Mordellidae;Mordellochroa;Mordellochroa abdominalis;Germany;GenBank;-;KM445539  
 Coleoptera;Lymexylidae;Elateroides;Elateroides dermestoides;Germany;Bold;FBCOD1210-11;KM446388  
 Coleoptera;Elateridae;Denticollis;Denticollis linearis;Germany;GenBank;-;KM447495  
 Coleoptera;Cerambycidae;Exocentrus;Exocentrus punctipennis;Slovenia;GenBank;-;KM448299  
 Coleoptera;Scarabaeidae;Valgus;Valgus hemipterus;Greece;GenBank;-;KM448345  
 Coleoptera;Pyrochroidae;Pyrochroa;Pyrochroa serraticornis;Germany;GenBank;-;KM448454  
 Coleoptera;Buprestidae;Anthaxia;Anthaxia helvetica;Slovenia;GenBank;-;KM448847  
 Coleoptera;Scarabaeidae;Trichius;Trichius sexualis;Slovenia;GenBank;-;KM448908  
 Coleoptera;Staphylinidae;Dinaraea;Dinaraea aequata;Belgium;GenBank;-;KM449008  
 Coleoptera;Buprestidae;Agrilus;Agrilus viridis;Germany;GenBank;-;KM450118  
 Coleoptera;Staphylinidae;Ischnoglossa;Ischnoglossa prolixa;Belgium;GenBank;-;KM450786  
 Coleoptera;Staphylinidae;Quedius;Quedius maurus;Belgium;GenBank;-;KM450789  
 Coleoptera;Lymexylidae;Elateroides;Elateroides dermestoides;France;Bold;GBCOU279-13;KM451813  
 Coleoptera;Buprestidae;Chrysobothris;Chrysobothris affinis;Greece;GenBank;-;KM451934  
 Coleoptera;Lymexylidae;Elateroides;Elateroides dermestoides;Austria;Bold;GBCOU2419-13;KM452358  
 Coleoptera;Buprestidae;Agrilus;Agrilus sulcicollis;Slovakia;GenBank;-;KT250459  
 Coleoptera;Curculionidae;Kyklioacalles;Kyklioacalles punctaticollis;Spain;Bold;GBCL46441-19;KU170190  
 Coleoptera;Ptinidae;Anobium;Anobium punctatum;France;GenBank;-;KU494028  
 Coleoptera;Ptinidae;Nicobium;Nicobium castaneum;Germany;GenBank;-;KU494146  
 Coleoptera;Ptiliidae;Priobium;Priobium carpini;France;GenBank;-;KU494206  
 Coleoptera;Buprestidae;Anthaxia;Anthaxia nitidula;Germany;GenBank;-;KU906462  
 Coleoptera;Staphylinidae;Atrecus;Atrecus affinis;France;GenBank;-;KU906787  
 Coleoptera;Buprestidae;Anthaxia;Anthaxia nitidula;Germany;GenBank;-;KU907409  
 Coleoptera;Tenebrionidae;Cteniopos;Cteniopos sulphureus;Slovenia;GenBank;-;KU907781  
 Coleoptera;Buprestidae;Anthaxia;Anthaxia nitidula;Germany;GenBank;-;KU908183  
 Coleoptera;Scraptiidae;Anaspis;Anaspis pulicaria;Italy;GenBank;-;KU908772  
 Coleoptera;Buprestidae;Agrilus;Agrilus viridis;Germany;GenBank;-;KU909316  
 Coleoptera;Scarabaeidae;Cetonia;Cetonia aurata;Germany;GenBank;-;KU909732  
 Coleoptera;Curculionidae;Ips;Ips acuminatus;Germany;GenBank;-;KU910832  
 Coleoptera;Buprestidae;Agrilus;Agrilus viridis;Germany;GenBank;-;KU910885  
 Coleoptera;Lucanidae;Dorcus;Dorcus parallelipipedus;Germany;GenBank;-;KU911240  
 Coleoptera;Buprestidae;Anthaxia;Anthaxia nitidula;Germany;GenBank;-;KU913055  
 Coleoptera;Scraptiidae;Anaspis;Anaspis costai;Germany;GenBank;-;KU914019  
 Coleoptera;Scraptiidae;Anaspis;Anaspis pulicaria;Italy;GenBank;-;KU914057  
 Coleoptera;Buprestidae;Agrilus;Agrilus viridis;Germany;GenBank;-;KU915192  
 Coleoptera;Buprestidae;Agrilus;Agrilus viridis;Germany;GenBank;-;KU915193  
 Coleoptera;Scraptiidae;Anaspis;Anaspis costai;Germany;GenBank;-;KU915666  
 Coleoptera;Cerambycidae;Stictoleptura;Stictoleptura rubra;Germany;Bold;GCOL560-16;KU916542  
 Coleoptera;Tenebrionidae;Uloma;Uloma culinaris;Slovenia;GenBank;-;KU916659  
 Coleoptera;Curculionidae;Ips;Ips acuminatus;Germany;GenBank;-;KU916950

Coleoptera;Scarabaeidae;Oryctes;Oryctes nasicornis;Russia;GenBank;-;MF115595  
 Coleoptera;Cerambycidae;Cerambyx;Cerambyx miles;Greece;GenBank;-;MF591720  
 Coleoptera;Pyrochroidae;Schizotus;Schizotus pectinicornis;Russia;GenBank;-;MF776965  
 Coleoptera;Buprestidae;Agrilus;Agrilus graminis;Slovakia;GenBank;-;MF805187  
 Coleoptera;Buprestidae;Agrilus;Agrilus angustulus;Slovakia;GenBank;-;MF805200  
 Coleoptera;Buprestidae;Agrilus;Agrilus graminis;Slovakia;GenBank;-;MF805218  
 Coleoptera;Buprestidae;Agrilus;Agrilus graminis;Slovakia;GenBank;-;MF805248  
 Coleoptera;Curculionidae;Dichromacalles;Dichromacalles rolletii;Italy;GenBank;-;MG229717  
 Coleoptera;Curculionidae;Kyklioacalles;Acalles aubei;Russia;GenBank;-;MG229797  
 Coleoptera;Curculionidae;Kyklioacalles;Acalles aubei;Russia;GenBank;-;MG229799  
 Coleoptera;Curculionidae;Mesites;Mesites pallidipennis;Ukraine;GenBank;-;MH618684  
 Coleoptera;Cucujidae;Cucujus;Cucujus haematodes;Poland;GenBank;-;MK315146  
 Coleoptera;Cucujidae;Cucujus;Cucujus haematodes;Poland;GenBank;-;MK315147  
 Coleoptera;Cucujidae;Cucujus;Cucujus haematodes;Poland;GenBank;-;MK315148  
 Coleoptera;Curculionidae;Ips;Ips sexdentatus;Spain;GenBank;-;MK643361  
 Coleoptera;Curculionidae;Ips;Ips sexdentatus;Spain;GenBank;-;MK643362  
 Coleoptera;Curculionidae;Ips;Ips sexdentatus;Spain;GenBank;-;MK643363  
 Coleoptera;Curculionidae;Ips;Ips sexdentatus;Spain;GenBank;-;MK643364  
 Coleoptera;Curculionidae;Ips;Ips sexdentatus;Spain;GenBank;-;MK643365  
 Coleoptera;Curculionidae;Ips;Ips sexdentatus;Spain;GenBank;-;MK643366  
 Coleoptera;Curculionidae;Ips;Ips sexdentatus;Spain;GenBank;-;MK643367  
 Coleoptera;Curculionidae;Ips;Ips sexdentatus;Spain;GenBank;-;MK643368  
 Coleoptera;Curculionidae;Ips;Ips sexdentatus;Spain;GenBank;-;MK643369  
 Coleoptera;Curculionidae;Ips;Ips sexdentatus;Spain;GenBank;-;MK643370  
 Coleoptera;Curculionidae;Ips;Ips sexdentatus;Spain;GenBank;-;MK643371  
 Coleoptera;Curculionidae;Dryocoetes;Dryocoetes villosus;France;Bold;PSFOR1195-17;MN182790  
 Coleoptera;Scarabaeidae;Protaetia;Protaetia cuprea;France;Bold;PSFOR1500-17;MN182806  
 Coleoptera;Elateridae;Melanotus;Melanotus villosus;France;GenBank;-;MN182811  
 Coleoptera;Buprestidae;Chrysobothris;Chrysobothris solieri;France;GenBank;-;MN182819  
 Coleoptera;Ptinidae;Hemicoelus;Hemicoelus costatus;France;GenBank;-;MN182876  
 Coleoptera;Histeridae;Gnathoncus;Gnathoncus rotundatus;France;GenBank;-;MN182882  
 Coleoptera;Curculionidae;Dryocoetes;Dryocoetes villosus;France;Bold;PSFOR1198-17;MN182899  
 Coleoptera;Alexiidae;Sphaerosoma;Sphaerosoma pilosum;France;GenBank;-;MN182911  
 Coleoptera;Tenebrionidae;Allecula;Allecula morio;France;GenBank;-;MN182939  
 Coleoptera;Oedemeridae;Nacerdes;Nacerdes melanura;France;GenBank;-;MN182958  
 Coleoptera;Tenebrionidae;Eledonoprius;Eledonoprius armatus;France;GenBank;-;MN182976  
 Coleoptera;Anobiinae;Homophthalmus;Homophthalmus rugicollis;France;GenBank;-;MN182990  
 Coleoptera;Melandryidae;Osphya;Osphya bipunctata;France;GenBank;-;MN183000  
 Coleoptera;Curculionidae;Dryocoetes;Dryocoetes villosus;France;Bold;PSFOR1194-17;MN183012  
 Coleoptera;Scarabaeidae;Protaetia;Protaetia cuprea;France;Bold;PSFOR1503-17;MN183018  
 Coleoptera;Ptinidae;Nicobium;Nicobium castaneum;France;GenBank;-;MN183033  
 Coleoptera;Buprestidae;Agrilus;Agrilus laticornis;France;GenBank;-;MN183041  
 Coleoptera;Oedemeridae;Nacerdes;Nacerdes melanura;France;GenBank;-;MN183047  
 Coleoptera;Scolytidae;Thamnurgus;Thamnurgus euphorbiae;Italy;GenBank;-;MN344663  
 Coleoptera;Staphylinidae;Quedius;Quedius truncicola;Germany;GenBank;-;MW259557  
 Coleoptera;Staphylinidae;Quedius;Quedius truncicola;Germany;GenBank;-;MW259777  
 Coleoptera;Staphylinidae;Anomognathus;Anomognathus cuspidatus;Finland;GenBank;-;MW661355  
 Coleoptera;Cerambycidae;Mesosa;Mesosa nebulosa;Slovakia;GenBank;-;MW982722  
 Coleoptera;Cerambycidae;Mesosa;Mesosa curculionoides;Hungary;GenBank;-;MW982828  
 Coleoptera;Clambidae;Clambus;Clambus pubescens;Finland;GenBank;-;MZ606858  
 Coleoptera;Anthribidae;Dissoleucis;Dissoleucis niveirostris;Finland;GenBank;-;MZ606968  
 Coleoptera;Tenebrionidae;Uloma;Uloma rufa;Finland;GenBank;-;MZ607099  
 Coleoptera;Cerambycidae;Semanotus;Semanotus undatus;Finland;GenBank;-;MZ607312  
 Coleoptera;Cerambycidae;Acmaeops;Acmaeops marginatus;Finland;GenBank;-;MZ607850  
 Coleoptera;Ciidae;Octotemnus;Octotemnus glabriculus;Finland;GenBank;-;MZ608414  
 Coleoptera;Cerambycidae;Pogonocherus;Pogonocherus hispidus;Finland;GenBank;-;MZ608704  
 Coleoptera;Melandryidae;Abdera;Abdera flexuosa;Finland;GenBank;-;MZ608807  
 Coleoptera;Curculionidae;Trypodendron;Trypodendron lineatum;Finland;GenBank;-;MZ609410  
 Coleoptera;Curculionidae;Trypodendron;Trypodendron domesticum;Finland;GenBank;-;MZ609439  
 Coleoptera;Staphylinidae;Phloeocharis;Phloeocharis subtilissima;Finland;GenBank;-;MZ609627  
 Coleoptera;Clambidae;Clambus;Clambus pubescens;Finland;GenBank;-;MZ610301  
 Coleoptera;Leiodidae;Agathidium;Agathidium atrum;Finland;GenBank;-;MZ610690  
 Coleoptera;Monotomidae;Monotoma;Monotoma longicollis;Finland;GenBank;-;MZ610851  
 Coleoptera;Eucnemidae;Microrhagus;Microrhagus pygmaeus;Finland;GenBank;-;MZ610895  
 Coleoptera;Lophocateridae;Grynocharis;Grynocharis oblonga;Finland;GenBank;-;MZ611151  
 Coleoptera;Cleridae;Tillus;Tillus elongatus;Finland;GenBank;-;MZ611361  
 Coleoptera;Elateridae;Ampedus;Ampedus pomonae;Finland;GenBank;-;MZ629286  
 Coleoptera;Cryptophagidae;Cryptophagus;Cryptophagus populi;Finland;GenBank;-;MZ629287  
 Coleoptera;Tenebrionidae;Uloma;Uloma rufa;Finland;GenBank;-;MZ629346  
 Coleoptera;Elateridae;Ampedus;Ampedus pomonae;Finland;GenBank;-;MZ629371  
 Coleoptera;Lophocateridae;Grynocharis;Grynocharis oblonga;Finland;GenBank;-;MZ629405  
 Coleoptera;Staphylinidae;Trimium;Trimium brevicorne;Finland;GenBank;-;MZ629533  
 Coleoptera;Monotomidae;Rhizophagus;Rhizophagus depressus;Finland;GenBank;-;MZ629578  
 Coleoptera;Leiodidae;Anisotoma;Anisotoma orbicularis;Finland;GenBank;-;MZ629591  
 Coleoptera;Cryptophagidae;Atomaria;Atomaria umbrina;Finland;GenBank;-;MZ629629  
 Coleoptera;Ptiliidae;Ptenidium;Ptenidium nitidum;Finland;GenBank;-;MZ629753  
 Coleoptera;Staphylinidae;Trimium;Trimium brevicorne;Finland;GenBank;-;MZ629763  
 Coleoptera;Tetratomidae;Tetratoma;Tetratoma fungorum;Finland;GenBank;-;MZ630063

Coleoptera;Melandryidae;Dolotarsus;Dolotarsus lividus;Finland;GenBank;-;MZ630143  
 Coleoptera;Mycetophagidae;Mycetophagus;Mycetophagus quadripustulatus;Finland;GenBank;-;MZ630177  
 Coleoptera;Scarabaeidae;Protaetia;Protaetia cuprea;Finland;GenBank;-;MZ630412  
 Coleoptera;Ptiliidae;Ptenidium;Ptenidium pusillum;Finland;GenBank;-;MZ630461  
 Coleoptera;Scarabaeidae;Trichius;Trichius fasciatus;Finland;GenBank;-;MZ630476  
 Coleoptera;Melandryidae;Abdera;Abdera flexuosa;Finland;GenBank;-;MZ630532  
 Coleoptera;Ptiliidae;Ptilium;Ptilium exaratum;Finland;GenBank;-;MZ630659  
 Coleoptera;Curculionidae;Phloeotribus;Phloeotribus spinulosus;Finland;GenBank;-;MZ630722  
 Coleoptera;Lycidae;Pyropterus;Pyropterus nigroruber;Finland;GenBank;-;MZ630748  
 Coleoptera;Ptinidae;Xestobium;Xestobium rufovillosus;Finland;GenBank;-;MZ630758  
 Coleoptera;Ptiliidae;Xestobium;Xestobium rufovillosus;Finland;GenBank;-;MZ630791  
 Coleoptera;Tenebrionidae;Mycetochara;Mycetochara flavipes;Finland;GenBank;-;MZ630900  
 Coleoptera;Staphylinidae;Sepedophilus;Sepedophilus immaculatus;Finland;GenBank;-;MZ630917  
 Coleoptera;Ciidae;Ennearthron;Ennearthron cornutum;Finland;GenBank;-;MZ630920  
 Coleoptera;Curculionidae;Crypturgus;Crypturgus hispidulus;Finland;GenBank;-;MZ631086  
 Coleoptera;Ptinidae;Xestobium;Xestobium rufovillosus;Finland;GenBank;-;MZ631132  
 Coleoptera;Ciidae;Cis;Cis bidentatus;Finland;GenBank;-;MZ631135  
 Coleoptera;Cryptophagidae;Cryptophagus;Cryptophagus populi;Finland;GenBank;-;MZ631457  
 Coleoptera;Ptiliidae;Dendrophilus;Dendrophilus pygmaeus;Finland;GenBank;-;MZ631586  
 Coleoptera;Cryptophagidae;Atomaria;Atomaria umbrina;Finland;GenBank;-;MZ632001  
 Coleoptera;Staphylinidae;Bibloporus;Bibloporus bicolor;Finland;GenBank;-;MZ632046  
 Coleoptera;Staphylinidae;Phyllodrepa;Phyllodrepa nigra;Finland;GenBank;-;MZ632192  
 Coleoptera;Leiodidae;Anisotoma;Anisotoma castanea;Finland;GenBank;-;MZ632268  
 Coleoptera;Staphylinidae;Bibloporus;Bibloporus bicolor;Finland;GenBank;-;MZ632391  
 Coleoptera;Latridiidae;Corticaria;Corticaria crenulata;Finland;GenBank;-;MZ632468  
 Coleoptera;Cerambycidae;Tetrops;Tetrops praeustus;Finland;GenBank;-;MZ632603  
 Coleoptera;Lophocardiidae;Grynocharis;Grynocharis oblonga;Finland;GenBank;-;MZ632671  
 Coleoptera;Ciidae;Cis;Cis bidentatus;Finland;GenBank;-;MZ632759  
 Coleoptera;Ptiliidae;Ptenidium;Ptenidium nitidum;Finland;GenBank;-;MZ632913  
 Coleoptera;Histeridae;Plegaderus;Plegaderus caesus;Finland;GenBank;-;MZ632996  
 Coleoptera;Staphylinidae;Euplectus;Euplectus karsteni;Finland;GenBank;-;MZ633049  
 Coleoptera;Histeridae;Dendrophilus;Dendrophilus punctatus;Finland;GenBank;-;MZ633277  
 Coleoptera;Curculionidae;Crypturgus;Crypturgus hispidulus;Finland;GenBank;-;MZ633576  
 Coleoptera;Ptinidae;Xyletinus;Xyletinus ater;Finland;GenBank;-;MZ633590  
 Coleoptera;Cerambycidae;Tetrops;Tetrops praeustus;Finland;GenBank;-;MZ633609  
 Coleoptera;Mycetophagidae;Mycetophagus;Mycetophagus piceus;Finland;GenBank;-;MZ633678  
 Coleoptera;Ptiliidae;Ptenidium;Ptenidium nitidum;Finland;GenBank;-;MZ633679  
 Coleoptera;Erotylidae;Tritoma;Tritoma bipustulata;Finland;GenBank;-;MZ633713  
 Coleoptera;Staphylinidae;Euplectus;Euplectus karsteni;Finland;GenBank;-;MZ633819  
 Coleoptera;Histeridae;Dendrophilus;Dendrophilus punctatus;Finland;GenBank;-;MZ633871  
 Coleoptera;Staphylinidae;Bibloporus;Bibloporus bicolor;Finland;GenBank;-;MZ633982  
 Coleoptera;Staphylinidae;Gabrius;Gabrius splendidulus;Finland;GenBank;-;MZ656159  
 Coleoptera;Leiodidae;Liodopria;Liodopria serricornis;Finland;GenBank;-;MZ656170  
 Coleoptera;Ptiliidae;Ptilium;Ptilium exaratum;Finland;GenBank;-;MZ656381  
 Coleoptera;Lycidae;Pyropterus;Pyropterus nigroruber;Finland;GenBank;-;MZ656484  
 Coleoptera;Curculionidae;Polygraphus;Polygraphus poligraphus;Finland;GenBank;-;MZ656570  
 Coleoptera;Monotomidae;Rhizophagus;Rhizophagus depressus;Finland;GenBank;-;MZ656672  
 Coleoptera;Staphylinidae;Bolitochara;Bolitochara mulsanti;Finland;GenBank;-;MZ656717  
 Coleoptera;Cerambycidae;Tetrops;Tetrops praeustus;Finland;GenBank;-;MZ656721  
 Coleoptera;Staphylinidae;Atrecus;Atrecus affinis;Finland;GenBank;-;MZ657130  
 Coleoptera;Nitidulidae;Glischrochilus;Glischrochilus hortensis;Finland;GenBank;-;MZ657232  
 Coleoptera;Cerambycidae;Hylotrupes;Hylotrupes bajulus;Finland;GenBank;-;MZ657463  
 Coleoptera;Latridiidae;Cortinicara;Cortinicara gibbosa;Finland;GenBank;-;MZ657508  
 Coleoptera;Curculionidae;Orthotomicus;Orthotomicus laricis;Finland;GenBank;-;MZ657602  
 Coleoptera;Ciidae;Cis;Cis glabratus;Finland;GenBank;-;MZ657607  
 Coleoptera;Staphylinidae;Leptusa;Leptusa ruficollis;Finland;GenBank;-;MZ657672  
 Coleoptera;Alexiidae;Sphaerosoma;Sphaerosoma pilosum;Finland;GenBank;-;MZ657774  
 Coleoptera;Staphylinidae;Sepedophilus;Sepedophilus testaceus;Finland;GenBank;-;MZ657784  
 Coleoptera;Ciidae;Cis;Cis boleti;Finland;GenBank;-;MZ657860  
 Coleoptera;Staphylinidae;Euryusa;Euryusa castanoptera;Finland;GenBank;-;MZ657895  
 Coleoptera;Staphylinidae;Sepedophilus;Sepedophilus testaceus;Finland;GenBank;-;MZ658168  
 Coleoptera;Cerylonidae;Cerylon;Cerylon fagi;Finland;GenBank;-;MZ658829  
 Coleoptera;Cerambycidae;Tetrops;Tetrops praeustus;Finland;GenBank;-;MZ658860  
 Coleoptera;Leiodidae;Liodopria;Liodopria serricornis;Finland;GenBank;-;MZ658933  
 Coleoptera;Ciidae;Cis;Cis nitidus;Finland;GenBank;-;MZ658990  
 Coleoptera;Curculionidae;Orthotomicus;Orthotomicus laricis;Finland;GenBank;-;MZ659024  
 Coleoptera;Leiodidae;Agathidium;Agathidium seminum;Finland;GenBank;-;MZ659077  
 Coleoptera;Cerylonidae;Cerylon;Cerylon fagi;Finland;GenBank;-;MZ659320  
 Coleoptera;Staphylinidae;Euplectus;Euplectus karsteni;Finland;GenBank;-;MZ659575  
 Coleoptera;Ptinidae;Ptinomorphus;Ptinomorphus imperialis;Finland;GenBank;-;MZ659585  
 Coleoptera;Staphylinidae;Sepedophilus;Sepedophilus bipunctatus;Finland;GenBank;-;MZ659744  
 Coleoptera;Latridiidae;Cortinicara;Cortinicara gibbosa;Finland;GenBank;-;MZ659942  
 Coleoptera;Melandryidae;Orchesia;Orchesia undulata;Finland;GenBank;-;MZ659960  
 Coleoptera;Nitidulidae;Epuraea;Epuraea melanocephala;Finland;GenBank;-;MZ659976  
 Coleoptera;Lycidae;Dictyoptera;Dictyoptera aurora;Finland;GenBank;-;MZ660166  
 Coleoptera;Staphylinidae;Phyllodrepa;Phyllodrepa nigra;Finland;GenBank;-;MZ660225  
 Coleoptera;Ptiliidae;Ptenidium;Ptenidium punctatum;Finland;GenBank;-;MZ660231  
 Coleoptera;Staphylinidae;Dinaraea;Dinaraea aequata;Finland;GenBank;-;MZ660236

Coleoptera;Tenebrionidae;Uloma;Uloma rufa;Finland;GenBank;-;MZ660274  
 Coleoptera;Leiodidae;Agathidium;Agathidium badium;Finland;GenBank;-;MZ660395  
 Coleoptera;Ptinidae;Ernobius;Ernobius abietis;Finland;GenBank;-;MZ660439  
 Coleoptera;Monotomidae;Monotoma;Monotoma picipes;Finland;GenBank;-;MZ660504  
 Coleoptera;Ciidae;Ennearthron;Ennearthron cornutum;Finland;GenBank;-;MZ660544  
 Coleoptera;Latridiidae;Corticicaria;Corticicaria gibbosa;Finland;GenBank;-;MZ660564  
 Coleoptera;Staphylinidae;Bolitochara;Bolitochara mulsanti;Finland;GenBank;-;MZ660779  
 Coleoptera;Staphylinidae;Euryusa;Euryusa castanoptera;Finland;GenBank;-;MZ660885  
 Coleoptera;Aderidae;Aderus;Aderus populneus;Bulgaria;Bold;GMBUE3135-14;-  
 Coleoptera;Leiodidae;Agathidium;Agathidium seminulum;Finland;Bold;GMFID067-12;-  
 Coleoptera;Buprestidae;Agrilus;Agrilus viridis;Austria;Bold;TDAAT982-20;-  
 Coleoptera;Cerambycidae;Allosterna;Allosterna tabacicolor;Finland;Bold;GMFIF710-12;-  
 Coleoptera;Elateridae;Ampedus;Ampedus quercicola;Austria;Bold;TDAOE358-21;-  
 Coleoptera;Elateridae;Ampedus;Ampedus sanguinolentus;Norway;Bold;NOCOL029-12;-  
 Coleoptera;Elateridae;Ampedus;Ampedus sanguinolentus;Norway;Bold;NOCOL028-12;-  
 Coleoptera;Nitidulidae;Amphotis;Amphotis marginata;Belarus;Bold;GMBML392-17;-  
 Coleoptera;Scraptiidae;Anaspis;Anaspis frontalis;Belarus;Bold;GMBMK359-17;-  
 Coleoptera;Curculionidae;Anisandrus;Anisandrus dispar;Belarus;Bold;GMBMJ1769-17;-  
 Coleoptera;Buprestidae;Anogcodes;Anogcodes rufiventris;Austria;Bold;TDAAT1612-20;-  
 Coleoptera;Anthribidae;Anthribus;Anthribus nebulosus;Belarus;Bold;GMBMJ1807-17;-  
 Coleoptera;Throscidae;Aulonothroscus;Aulonothroscus brevicollis;Belarus;Bold;GMBMJ1548-17;-  
 Coleoptera;Throscidae;Aulonothroscus;Aulonothroscus brevicollis;Belarus;Bold;GMBMJ1868-17;-  
 Coleoptera;Throscidae;Aulonothroscus;Aulonothroscus brevicollis;Belarus;Bold;GMBMJ1869-17;-  
 Coleoptera;Throscidae;Aulonothroscus;Aulonothroscus brevicollis;Belarus;Bold;GMBMM1075-17;-  
 Coleoptera;Throscidae;Aulonothroscus;Aulonothroscus brevicollis;Belarus;Bold;GMBMJ1855-17;-  
 Coleoptera;Throscidae;Aulonothroscus;Aulonothroscus brevicollis;Belarus;Bold;GMBMJ1871-17;-  
 Coleoptera;Throscidae;Aulonothroscus;Aulonothroscus brevicollis;Belarus;Bold;GMBMJ1545-17;-  
 Coleoptera;Throscidae;Aulonothroscus;Aulonothroscus brevicollis;Belarus;Bold;GMBMJ1859-17;-  
 Coleoptera;Throscidae;Aulonothroscus;Aulonothroscus brevicollis;Belarus;Bold;GMBMJ1866-17;-  
 Coleoptera;Throscidae;Aulonothroscus;Aulonothroscus brevicollis;Belarus;Bold;GMBMJ1541-17;-  
 Coleoptera;Throscidae;Aulonothroscus;Aulonothroscus brevicollis;Belarus;Bold;GMBMK407-17;-  
 Coleoptera;Oedemeridae;Chrysanthia;Chrysanthia viridissima;Bulgaria;Bold;GMBUE972-14;-  
 Coleoptera;Buprestidae;Chrysobothris;Chrysobothris affinis;Austria;Bold;TDAOE351-21;-  
 Coleoptera;Cleridae;Clerus;Clerus mutillarius;Austria;Bold;TDAOE357-21;-  
 Coleoptera;Zopheridae;Colobicus;Colobicus hirtus;Austria;Bold;TDAOE363-21;-  
 Coleoptera;Latridiidae;Corticaria;Corticaria abietorum;Finland;Bold;GMFIK142-12;-  
 Coleoptera;Latridiidae;Corticarina;Corticarina similata;Bulgaria;Bold;GMBUA1482-14;-  
 Coleoptera;Latridiidae;Corticarina;Corticarina similata;Bulgaria;Bold;GMBUE3052-14;-  
 Coleoptera;Latridiidae;Corticarina;Corticarina similata;Bulgaria;Bold;GMBUA1483-14;-  
 Coleoptera;Latridiidae;Corticarina;Corticarina similata;Bulgaria;Bold;GMBUA1489-14;-  
 Coleoptera;Latridiidae;Corticarina;Corticarina similata;Belarus;Bold;GMBMH122-17;-  
 Coleoptera;Latridiidae;Corticarina;Corticarina similata;Belarus;Bold;GMBMH251-17;-  
 Coleoptera;Latridiidae;Corticarina;Corticarina similata;Belarus;Bold;GMBMH234-17;-  
 Coleoptera;Latridiidae;Corticarina;Corticarina truncatella;Bulgaria;Bold;GMBUE3069-14;-  
 Coleoptera;Latridiidae;Corticarina;Corticarina truncatella;Bulgaria;Bold;GMBUE3041-14;-  
 Coleoptera;Latridiidae;Corticicaria;Corticicaria gibbosa;Belarus;Bold;GMBMK400-17;-  
 Coleoptera;Latridiidae;Corticicaria;Corticicaria gibbosa;Belarus;Bold;GMBMS885-18;-  
 Coleoptera;Latridiidae;Corticicaria;Corticicaria gibbosa;Belarus;Bold;GMBMJ1757-17;-  
 Coleoptera;Latridiidae;Corticicaria;Corticicaria gibbosa;Belarus;Bold;GMBMJ1814-17;-  
 Coleoptera;Latridiidae;Corticicaria;Corticicaria gibbosa;Belarus;Bold;GMBMH121-17;-  
 Coleoptera;Latridiidae;Corticicaria;Corticicaria gibbosa;Belarus;Bold;GMBMR1374-17;-  
 Coleoptera;Latridiidae;Corticicaria;Corticicaria gibbosa;Belarus;Bold;GMBMJ1770-17;-  
 Coleoptera;Latridiidae;Corticicaria;Corticicaria gibbosa;Belarus;Bold;GMBMP2042-18;-  
 Coleoptera;Latridiidae;Corticicaria;Corticicaria gibbosa;Belarus;Bold;GMBMI233-17;-  
 Coleoptera;Latridiidae;Corticicaria;Corticicaria gibbosa;Belarus;Bold;GMBMJ1812-17;-  
 Coleoptera;Latridiidae;Corticicaria;Corticicaria gibbosa;Belarus;Bold;GMBMK380-17;-  
 Coleoptera;Latridiidae;Corticicaria;Corticicaria gibbosa;Belarus;Bold;GMBMQ1015-17;-  
 Coleoptera;Latridiidae;Corticicaria;Corticicaria gibbosa;Belarus;Bold;GMBMR1354-17;-  
 Coleoptera;Latridiidae;Corticicaria;Corticicaria gibbosa;Belarus;Bold;GMBMM1065-17;-  
 Coleoptera;Latridiidae;Corticicaria;Corticicaria gibbosa;Belarus;Bold;GMBMT153-18;-  
 Coleoptera;Latridiidae;Corticicaria;Corticicaria gibbosa;Belarus;Bold;GMBMT123-18;-  
 Coleoptera;Latridiidae;Corticicaria;Corticicaria gibbosa;Belarus;Bold;GMBMJ1746-17;-  
 Coleoptera;Latridiidae;Corticicaria;Corticicaria gibbosa;Belarus;Bold;GMBMM1072-17;-  
 Coleoptera;Latridiidae;Corticicaria;Corticicaria gibbosa;Belarus;Bold;GMBML408-17;-  
 Coleoptera;Latridiidae;Corticicaria;Corticicaria gibbosa;Belarus;Bold;GMBML410-17;-  
 Coleoptera;Latridiidae;Corticicaria;Corticicaria gibbosa;Belarus;Bold;GMBMQ1009-17;-  
 Coleoptera;Latridiidae;Corticicaria;Corticicaria gibbosa;Belarus;Bold;GMBMT161-18;-  
 Coleoptera;Latridiidae;Corticicaria;Corticicaria gibbosa;Belarus;Bold;GMBMT129-18;-  
 Coleoptera;Latridiidae;Corticicaria;Corticicaria gibbosa;Belarus;Bold;GMBMS886-18;-  
 Coleoptera;Latridiidae;Corticicaria;Corticicaria gibbosa;Belarus;Bold;GMBMH127-17;-  
 Coleoptera;Latridiidae;Corticicaria;Corticicaria gibbosa;Belarus;Bold;GMBMM1055-17;-  
 Coleoptera;Latridiidae;Corticicaria;Corticicaria gibbosa;Belarus;Bold;GMBMJ1744-17;-  
 Coleoptera;Latridiidae;Corticicaria;Corticicaria gibbosa;Belarus;Bold;GMBMH129-17;-  
 Coleoptera;Latridiidae;Corticicaria;Corticicaria gibbosa;Belarus;Bold;GMBMQ1023-17;-  
 Coleoptera;Latridiidae;Corticicaria;Corticicaria gibbosa;Belarus;Bold;GMBMM1080-17;-  
 Coleoptera;Latridiidae;Corticicaria;Corticicaria gibbosa;Belarus;Bold;GMBMM1054-17;-  
 Coleoptera;Latridiidae;Corticicaria;Corticicaria gibbosa;Belarus;Bold;GMBML407-17;-  
 Coleoptera;Latridiidae;Corticicaria;Corticicaria gibbosa;Belarus;Bold;GMBMQ1037-17;-

Coleoptera; Latridiidae; Cortinicara; Cortinicara gibbosa; Belarus; Bold; GMBMR1356-17;-  
 Coleoptera; Latridiidae; Cortinicara; Cortinicara gibbosa; Belarus; Bold; GMBMN986-17;-  
 Coleoptera; Latridiidae; Cortinicara; Cortinicara gibbosa; Belarus; Bold; GMBMK397-17;-  
 Coleoptera; Latridiidae; Cortinicara; Cortinicara gibbosa; Belarus; Bold; GMBMT136-18;-  
 Coleoptera; Latridiidae; Cortinicara; Cortinicara gibbosa; Belarus; Bold; GMBMJ1821-17;-  
 Coleoptera; Latridiidae; Cortinicara; Cortinicara gibbosa; Belarus; Bold; GMBMR1361-17;-  
 Coleoptera; Latridiidae; Cortinicara; Cortinicara gibbosa; Belarus; Bold; GMBMI223-17;-  
 Coleoptera; Latridiidae; Cortinicara; Cortinicara gibbosa; Belarus; Bold; GMBML398-17;-  
 Coleoptera; Latridiidae; Cortinicara; Cortinicara gibbosa; Belarus; Bold; GMBMT159-18;-  
 Coleoptera; Latridiidae; Cortinicara; Cortinicara gibbosa; Belarus; Bold; GMBMH119-17;-  
 Coleoptera; Latridiidae; Cortinicara; Cortinicara gibbosa; Belarus; Bold; GMBMI216-17;-  
 Coleoptera; Latridiidae; Cortinicara; Cortinicara gibbosa; Belarus; Bold; GMBMH118-17;-  
 Coleoptera; Latridiidae; Cortinicara; Cortinicara gibbosa; Belarus; Bold; GMBMM1066-17;-  
 Coleoptera; Latridiidae; Cortinicara; Cortinicara gibbosa; Belarus; Bold; GMBMR1365-17;-  
 Coleoptera; Latridiidae; Cortinicara; Cortinicara gibbosa; Belarus; Bold; GMBMI206-17;-  
 Coleoptera; Latridiidae; Cortinicara; Cortinicara gibbosa; Belarus; Bold; GMBMR1355-17;-  
 Coleoptera; Latridiidae; Cortinicara; Cortinicara gibbosa; Belarus; Bold; GMBMK399-17;-  
 Coleoptera; Latridiidae; Cortinicara; Cortinicara gibbosa; Belarus; Bold; GMBMT149-18;-  
 Coleoptera; Latridiidae; Cortinicara; Cortinicara gibbosa; Belarus; Bold; GMBMK398-17;-  
 Coleoptera; Latridiidae; Cortinicara; Cortinicara gibbosa; Belarus; Bold; GMBMK347-17;-  
 Coleoptera; Latridiidae; Cortinicara; Cortinicara gibbosa; Belarus; Bold; GMBMT154-18;-  
 Coleoptera; Latridiidae; Cortinicara; Cortinicara gibbosa; Belarus; Bold; GMBMH131-17;-  
 Coleoptera; Latridiidae; Cortinicara; Cortinicara gibbosa; Belarus; Bold; GMBMJ1768-17;-  
 Coleoptera; Latridiidae; Cortinicara; Cortinicara gibbosa; Belarus; Bold; GMBMJ1801-17;-  
 Coleoptera; Latridiidae; Cortinicara; Cortinicara gibbosa; Belarus; Bold; GMBMT162-18;-  
 Coleoptera; Latridiidae; Cortinicara; Cortinicara gibbosa; Belarus; Bold; GMBMS869-18;-  
 Coleoptera; Latridiidae; Cortinicara; Cortinicara gibbosa; Belarus; Bold; GMBMP2846-18;-  
 Coleoptera; Latridiidae; Cortinicara; Cortinicara gibbosa; Belarus; Bold; GMBMQ1054-17;-  
 Coleoptera; Latridiidae; Cortinicara; Cortinicara gibbosa; Belarus; Bold; GMBMT139-18;-  
 Coleoptera; Latridiidae; Cortinicara; Cortinicara gibbosa; Belarus; Bold; GMBMJ1817-17;-  
 Coleoptera; Latridiidae; Cortinicara; Cortinicara gibbosa; Belarus; Bold; GMBMT137-18;-  
 Coleoptera; Latridiidae; Cortinicara; Cortinicara gibbosa; Belarus; Bold; GMBMQ1018-17;-  
 Coleoptera; Latridiidae; Cortinicara; Cortinicara gibbosa; Belarus; Bold; GMBMI200-17;-  
 Coleoptera; Latridiidae; Cortinicara; Cortinicara gibbosa; Belarus; Bold; GMBMT147-18;-  
 Coleoptera; Latridiidae; Cortinicara; Cortinicara gibbosa; Belarus; Bold; GMBML390-17;-  
 Coleoptera; Latridiidae; Cortinicara; Cortinicara gibbosa; Belarus; Bold; GMBMS880-18;-  
 Coleoptera; Latridiidae; Cortinicara; Cortinicara gibbosa; Belarus; Bold; GMBMQ1041-17;-  
 Coleoptera; Latridiidae; Cortinicara; Cortinicara gibbosa; Belarus; Bold; GMBMQ1010-17;-  
 Coleoptera; Latridiidae; Cortinicara; Cortinicara gibbosa; Belarus; Bold; GMBMR1405-17;-  
 Coleoptera; Latridiidae; Cortinicara; Cortinicara gibbosa; Belarus; Bold; GMBMJ1797-17;-  
 Coleoptera; Latridiidae; Cortinicara; Cortinicara gibbosa; Belarus; Bold; GMBMQ993-17;-  
 Coleoptera; Latridiidae; Cortinicara; Cortinicara gibbosa; Belarus; Bold; GMBMK371-17;-  
 Coleoptera; Latridiidae; Cortinicara; Cortinicara gibbosa; Belarus; Bold; GMBMP2038-18;-  
 Coleoptera; Latridiidae; Cortinicara; Cortinicara gibbosa; Belarus; Bold; GMBMJ1777-17;-  
 Coleoptera; Latridiidae; Cortinicara; Cortinicara gibbosa; Belarus; Bold; GMBMP2029-18;-  
 Coleoptera; Latridiidae; Cortinicara; Cortinicara gibbosa; Belarus; Bold; GMBMP2033-18;-  
 Coleoptera; Latridiidae; Cortinicara; Cortinicara gibbosa; Belarus; Bold; GMBMQ995-17;-  
 Coleoptera; Latridiidae; Cortinicara; Cortinicara gibbosa; Belarus; Bold; GMBM0808-17;-  
 Coleoptera; Latridiidae; Cortinicara; Cortinicara gibbosa; Belarus; Bold; GMBMJ1538-17;-  
 Coleoptera; Latridiidae; Cortinicara; Cortinicara gibbosa; Belarus; Bold; GMBMQ1047-17;-  
 Coleoptera; Latridiidae; Cortinicara; Cortinicara gibbosa; Belarus; Bold; GMBMM1062-17;-  
 Coleoptera; Latridiidae; Cortinicara; Cortinicara gibbosa; Belarus; Bold; GMBML236-17;-  
 Coleoptera; Latridiidae; Cortinicara; Cortinicara gibbosa; Belarus; Bold; GMBMT160-18;-  
 Coleoptera; Latridiidae; Cortinicara; Cortinicara gibbosa; Belarus; Bold; GMBMQ1002-17;-  
 Coleoptera; Latridiidae; Cortinicara; Cortinicara gibbosa; France; Bold; GMFPC184-18;-  
 Coleoptera; Nitidulidae; Cryptarcha; Cryptarcha undata; Germany; Bold; ULMCA016-19;-  
 Coleoptera; Laemophloeidae; Cryptolestes; Cryptolestes duplicatus; Austria; Bold; TDAOE347-21;-  
 Coleoptera; Laemophloeidae; Cryptolestes; Cryptolestes duplicatus; Austria; Bold; TDAOE385-21;-  
 Coleoptera; Laemophloeidae; Cryptolestes; Cryptolestes ferrugineus; Germany; Bold; CSP049-09;-  
 Coleoptera; Cryptophagidae; Cryptophagus; Cryptophagus dorsalis; Belarus; Bold; GMBMJ1811-17;-  
 Coleoptera; Cryptophagidae; Cryptophagus; Cryptophagus scanicus; Bulgaria; Bold; GMBUA1455-14;-  
 Coleoptera; Curculionidae; Crypturgus; Crypturgus cinereus; Hungary; Bold; SCOL011-12;-  
 Coleoptera; Curculionidae; Crypturgus; Crypturgus cinereus; Hungary; Bold; SCOL003-12;-  
 Coleoptera; Curculionidae; Crypturgus; Crypturgus hispidulus; Norway; Bold; SCOL064-12;-  
 Coleoptera; Melyridae; Dasytes; Dasytes aeratus; Bulgaria; Bold; GMBUA1460-14;-  
 Coleoptera; Melyridae; Dasytes; Dasytes aeratus; Austria; Bold; TDAOE307-21;-  
 Coleoptera; Melyridae; Dasytes; Dasytes plumbeus; Belarus; Bold; GMBMN1002-17;-  
 Coleoptera; Melyridae; Dasytes; Dasytes plumbeus; Belarus; Bold; GMBML402-17;-  
 Coleoptera; Melyridae; Dasytes; Dasytes plumbeus; Belarus; Bold; GMBMN1011-17;-  
 Coleoptera; Melyridae; Dasytes; Dasytes plumbeus; Belarus; Bold; GMBMQ1325-17;-  
 Coleoptera; Melyridae; Dasytes; Dasytes plumbeus; Belarus; Bold; GMBMN1019-17;-  
 Coleoptera; Melyridae; Dasytes; Dasytes plumbeus; Belarus; Bold; GMBML396-17;-  
 Coleoptera; Melyridae; Dasytes; Dasytes plumbeus; Austria; Bold; TDAAT1846-20;-  
 Coleoptera; Melyridae; Dasytes; Dasytes virens; Austria; Bold; TDAOE305-21;-  
 Coleoptera; Elateridae; Denticollis; Denticollis linearis; Norway; Bold; NOCOL018-12;-  
 Coleoptera; Lycidae; Dictyoptera; Dictyoptera aurora; Norway; Bold; NOCOL066-12;-  
 Coleoptera; Staphylinidae; Dinaraea; Dinaraea aequata; Bulgaria; Bold; GMBUA1465-14;-  
 Coleoptera; Cerambycidae; Dinoptera; Dinoptera collaris; Poland; Bold; COLAT207-08;-

Coleoptera;Cerambycidae;Dinoptera;Dinoptera collaris;Poland;Bold;COLAT208-08;-  
 Coleoptera;Anthribidae;Dissoleucas;Dissoleucas niveirostris;Belarus;Bold;GMBMI227-17;-  
 Coleoptera;Lucanidae;Dorcus;Dorcus parallelipipedus;Austria;Bold;TDAOE324-21;-  
 Coleoptera;Staphylinidae;Dropephylla;Dropephylla gracilicornis;Norway;Bold;NOCLP1802-19;-  
 Coleoptera;Staphylinidae;Dropephylla;Dropephylla ioptera;Norway;Bold;NOCLP1807-19;-  
 Coleoptera;Staphylinidae;Dropephylla;Dropephylla ioptera;Bulgaria;Bold;GMBUA1425-14;-  
 Coleoptera;Staphylinidae;Dropephylla;Dropephylla ioptera;Norway;Bold;NOCLP1806-19;-  
 Coleoptera;Curculionidae;Dryocoetes;Dryocoetes autographus;Sweden;Bold;SCOL142-12;-  
 Coleoptera;Curculionidae;Dryocoetes;Dryocoetes autographus;Norway;Bold;SCOL14-12;-  
 Coleoptera;Elateridae;Elater;Elater ferrugineus;Croatia;Bold;ICRYO045-22;-  
 Coleoptera;Elateridae;Elater;Elater ferrugineus;Croatia;Bold;ICRYO044-22;-  
 Coleoptera;Latridiidae;Enicmus;Enicmus transversus;Belarus;Bold;GMBMJ1815-17;-  
 Coleoptera;Nitidulidae;Epuraea;Epuraea biguttata;Germany;Bold;ULMCA004-19;-  
 Coleoptera;Nitidulidae;Epuraea;Epuraea biguttata;Germany;Bold;ULMCA006-19;-  
 Coleoptera;Nitidulidae;Epuraea;Epuraea biguttata;Germany;Bold;ULMCA007-19;-  
 Coleoptera;Nitidulidae;Epuraea;Epuraea biguttata;Germany;Bold;ULMCA014-19;-  
 Coleoptera;Nitidulidae;Epuraea;Epuraea melanocephala;Belarus;Bold;GMBMM1051-17;-  
 Coleoptera;Nitidulidae;Epuraea;Epuraea unicolor;Germany;Bold;ULMCA009-19;-  
 Coleoptera;Nitidulidae;Ernoporos;Ernoporos tiliae;Norway;Bold;SCOL12-12;-  
 Coleoptera;Curculionidae;Ernoporos;Ernoporos tiliae;Norway;Bold;SCOL043-12;-  
 Coleoptera;Staphylinidae;Gabrius;Gabrius splendidulus;Austria;Bold;TDAOE336-21;-  
 Coleoptera;Nitidulidae;Glischrochilus;Glischrochilus quadriguttatus;Germany;Bold;ULMCA001-19;-  
 Coleoptera;Nitidulidae;Glischrochilus;Glischrochilus quadriguttatus;Germany;Bold;ULMCA012-19;-  
 Coleoptera;Scarabaeidae;Gnorimus;Gnorimus variabilis;Croatia;Bold;ICRYO043-22;-  
 Coleoptera;Scarabaeidae;Gnorimus;Gnorimus variabilis;Croatia;Bold;ICRYO046-22;-  
 Coleoptera;Scarabaeidae;Gnorimus;Gnorimus variabilis;Croatia;Bold;ICRYO047-22;-  
 Coleoptera;Cerambycidae;Gracilia;Gracilia minuta;Austria;Bold;SICOE925-19;-  
 Coleoptera;Cerambycidae;Grammoptera;Grammoptera ruficornis;Bulgaria;Bold;GMBUA343-14;-  
 Coleoptera;Histeridae;Hololepta;Hololepta plana;Croatia;Bold;ICRYO025-22;-  
 Coleoptera;Curculionidae;Hylastes;Hylastes angustatus;Norway;Bold;NOCLP1735-19;-  
 Coleoptera;Curculionidae;Hylastes;Hylastes opacus;Norway;Bold;NOCLP1733-19;-  
 Coleoptera;Curculionidae;Hylesinus;Hylesinus toranio;Norway;Bold;NOCLP1715-19;-  
 Coleoptera;Curculionidae;Hylesinus;Hylesinus toranio;Norway;Bold;NOCLP1714-19;-  
 Coleoptera;Curculionidae;Hylesinus;Hylesinus varius;Norway;Bold;NOCLP1721-19;-  
 Coleoptera;Cerambycidae;Hylotrupes;Hylotrupes bajulus;Austria;Bold;TDAAT1928-20;-  
 Coleoptera;Curculionidae;Hylurgops;Hylurgops palliatus;Austria;Bold;TDAOE342-21;-  
 Coleoptera;Curculionidae;Hylurgops;Hylurgops palliatus;Norway;Bold;SCOL015-12;-  
 Coleoptera;Curculionidae;Hylurgops;Hylurgops palliatus;Hungary;Bold;SCOL006-12;-  
 Coleoptera;Curculionidae;Ips;Ips acuminatus;Norway;Bold;SCOL023-12;-  
 Coleoptera;Curculionidae;Ips;Ips acuminatus;Norway;Bold;SCOL026-12;-  
 Coleoptera;Curculionidae;Ips;Ips acuminatus;Norway;Bold;NOCLP1772-19;-  
 Coleoptera;Curculionidae;Ips;Ips acuminatus;Norway;Bold;NOCLP1773-19;-  
 Coleoptera;Curculionidae;Ips;Ips sexdentatus;Norway;Bold;NOCLP1770-19;-  
 Coleoptera;Curculionidae;Ips;Ips sexdentatus;Spain;Bold;SCOL065-12;-  
 Coleoptera;Curculionidae;Ips;Ips sexdentatus;Hungary;Bold;SCOL005-12;-  
 Coleoptera;Curculionidae;Kissophagus;Kissophagus hederæ;Austria;Bold;SCOL001-12;-  
 Coleoptera;Staphylinidae;Leptusa;Leptusa pulchella;Norway;Bold;ZMBN134-16;-  
 Coleoptera;Staphylinidae;Leptusa;Leptusa pulchella;Finland;Bold;GMFID066-12;-  
 Coleoptera;Eucnemidae;Microrhagus;Microrhagus pygmaeus;Norway;Bold;NOCLP1712-19;-  
 Coleoptera;Eucnemidae;Microrhagus;Microrhagus pygmaeus;Norway;Bold;NOCLP1707-19;-  
 Coleoptera;Mordellidae;Mordellochroa;Mordellochroa abdominalis;Belarus;Bold;GMBMK019-17;-  
 Coleoptera;Tenebrionidae;Neomida;Neomida haemorrhoidalis;Austria;Bold;TDAOE472-21;-  
 Coleoptera;Melandryidae;Orchesia;Orchesia minor;Finland;Bold;GMFID065-12;-  
 Coleoptera;Melandryidae;Orchesia;Orchesia undulata;Norway;Bold;COLHH1572-18;-  
 Coleoptera;Melandryidae;Orchesia;Orchesia undulata;Belarus;Bold;GMBMJ1745-17;-  
 Coleoptera;Curculionidae;Orthotomicus;Orthotomicus erosus;Spain;Bold;SCOL066-12;-  
 Coleoptera;Cucujidae;Pediacus;Pediacus depressus;Germany;Bold;ULMCA002-19;-  
 Coleoptera;Cucujidae;Pediacus;Pediacus depressus;Germany;Bold;ULMCA010-19;-  
 Coleoptera;Curculionidae;Phloeophagus;Phloeophagus lignarius;Norway;Bold;NOCLP1404-19;-  
 Coleoptera;Staphylinidae;Phloeopora;Phloeopora teres;Austria;Bold;TDAOE345-21;-  
 Coleoptera;Staphylinidae;Phloeopora;Phloeopora teres;Austria;Bold;TDAOE334-21;-  
 Coleoptera;Staphylinidae;Phloeostiba;Phloeostiba plana;Germany;Bold;ULMCA008-19;-  
 Coleoptera;Curculionidae;Phloeotribus;Phloeotribus spinulosus;Norway;Bold;NOCLP1741-19;-  
 Coleoptera;Curculionidae;Pityogenes;Pityogenes bidentatus;Sweden;Bold;SCOL130-12;-  
 Coleoptera;Curculionidae;Pityogenes;Pityogenes bidentatus;Norway;Bold;NOCLP1763-19;-  
 Coleoptera;Curculionidae;Pityogenes;Pityogenes bistridentatus;Hungary;Bold;SCOL328-12;-  
 Coleoptera;Curculionidae;Pityophthorus;Pityophthorus pityographus;Hungary;Bold;SCOL010-12;-  
 Coleoptera;Curculionidae;Pityophthorus;Pityophthorus pityographus;Hungary;Bold;SCOL009-12;-  
 Coleoptera;Anthribidae;Platyrhinus;Platyrhinus resinosus;Austria;Bold;TDAOE287-21;-  
 Coleoptera;Cerambycidae;Pogonocherus;Pogonocherus hispidus;Norway;Bold;COLHH1530-18;-  
 Coleoptera;Curculionidae;Polygraphus;Polygraphus poligraphus;Norway;Bold;SCOL045-12;-  
 Coleoptera;Cerambycidae;Prinobius;Prinobius myardi;France;Bold;CERAF123-08;-  
 Coleoptera;Scirtidae;Prionocyphon;Prionocyphon serricornis;Belarus;Bold;GMBMN1027-17;-  
 Coleoptera;Curculionidae;Pselactus;Pselactus spadix;Norway;Bold;NOCLP1408-19;-  
 Coleoptera;Cerambycidae;Pseudovadonia;Pseudovadonia livida;Austria;Bold;TDAOE361-21;-  
 Coleoptera;Anthribidae;Rhapitropis;Rhapitropis marchicus;Bulgaria;Bold;GMBUA1443-14;-  
 Coleoptera;Salpingidae;Salpingus;Salpingus planirostris;Norway;Bold;ZMBN969-17;-  
 Coleoptera;Salpingidae;Salpingus;Salpingus ruficollis;Belarus;Bold;GMBMA558-17;-

Coleoptera;Staphylinidae;Scaphisoma;Scaphisoma agaricinum;Austria;Bold;TDAOE382-21;-  
 Coleoptera;Curculionidae;Scolytus;Scolytus intricatus;Norway;Bold;SCOL044-12;-  
 Coleoptera;Curculionidae;Scolytus;Scolytus intricatus;Norway;Bold;SCOL016-12;-  
 Coleoptera;Staphylinidae;Sepedophilus;Sepedophilus testaceus;France;Bold;POLYT173-19;-  
 Coleoptera;Silvanidae;Silvanus;Silvanus unidentatus;Austria;Bold;TDAOE387-21;-  
 Coleoptera;Silvanidae;Silvanus;Silvanus unidentatus;Austria;Bold;TDAOE346-21;-  
 Coleoptera;Nitidulidae;Soronia;Soronia grisea;Germany;Bold;ULMCA003-19;-  
 Coleoptera;Nitidulidae;Soronia;Soronia grisea;Germany;Bold;ULMCA017-19;-  
 Coleoptera;Cerambycidae;Spondylis;Spondylis buprestoides;Austria;Bold;TDAAT1929-20;-  
 Coleoptera;Elateridae;Stenagostus;Stenagostus rhombeus;Croatia;Bold;ICRYO034-22;-  
 Coleoptera;Elateridae;Stenagostus;Stenagostus rhombeus;Croatia;Bold;ICRYO051-22;-  
 Coleoptera;Cerambycidae;Stenurella;Stenurella nigra;Bulgaria;Bold;GMBUB183-14;-  
 Coleoptera;Trogossitidae;Tenebroides;Tenebroides mauritanicus;Germany;Bold;CSP055-09;-  
 Coleoptera;Trogossitidae;Tenebroides;Tenebroides mauritanicus;Germany;Bold;CSP056-09;-  
 Coleoptera;Cleridae;Thanasimus;Thanasimus femoralis;Estonia;Bold;COLFH145-14;-  
 Coleoptera;Curculionidae;Tomicus;Tomicus piniperda;Sweden;Bold;SCOL141-12;-  
 Coleoptera;Mordellidae;Tomoxia;Tomoxia bucephala;Austria;Bold;TDAOE309-21;-  
 Coleoptera;Staphylinidae;Trimium;Trimium brevicorne;Belarus;Bold;GMBMJ1780-17;-  
 Coleoptera;Erotylidae;Tritoma;Tritoma bipustulata;Bulgaria;Bold;GMBUB1629-14;-  
 Coleoptera;Throscidae;Trixagus;Trixagus carinifrons;Norway;Bold;GMNWF3053-14;-  
 Coleoptera;Throscidae;Trixagus;Trixagus carinifrons;Belarus;Bold;GMBMP1912-18;-  
 Coleoptera;Throscidae;Trixagus;Trixagus carinifrons;Norway;Bold;GMNWF1974-14;-  
 Coleoptera;Throscidae;Trixagus;Trixagus carinifrons;Norway;Bold;GMNWF3123-14;-  
 Coleoptera;Throscidae;Trixagus;Trixagus carinifrons;Norway;Bold;GMNWF3146-14;-  
 Coleoptera;Throscidae;Trixagus;Trixagus carinifrons;Belarus;Bold;GMBMP1929-18;-  
 Coleoptera;Throscidae;Trixagus;Trixagus carinifrons;Norway;Bold;GMNWF1980-14;-  
 Coleoptera;Throscidae;Trixagus;Trixagus carinifrons;Belarus;Bold;GMBMO787-17;-  
 Coleoptera;Throscidae;Trixagus;Trixagus carinifrons;Norway;Bold;GMNWF3036-14;-  
 Coleoptera;Throscidae;Trixagus;Trixagus carinifrons;Norway;Bold;GMNWF3131-14;-  
 Coleoptera;Throscidae;Trixagus;Trixagus carinifrons;Belarus;Bold;GMBMP1939-18;-  
 Coleoptera;Throscidae;Trixagus;Trixagus carinifrons;Norway;Bold;GMNWF3253-14;-  
 Coleoptera;Throscidae;Trixagus;Trixagus carinifrons;Belarus;Bold;GMBMJ1852-17;-  
 Coleoptera;Throscidae;Trixagus;Trixagus carinifrons;Norway;Bold;GMNWF3224-14;-  
 Coleoptera;Throscidae;Trixagus;Trixagus carinifrons;Norway;Bold;GMNWF3263-14;-  
 Coleoptera;Throscidae;Trixagus;Trixagus carinifrons;Bulgaria;Bold;GMBUB1586-14;-  
 Coleoptera;Throscidae;Trixagus;Trixagus carinifrons;Belarus;Bold;GMBMJ1857-17;-  
 Coleoptera;Throscidae;Trixagus;Trixagus carinifrons;Norway;Bold;GMNWF3061-14;-  
 Coleoptera;Throscidae;Trixagus;Trixagus carinifrons;Belarus;Bold;GMBMK365-17;-  
 Coleoptera;Throscidae;Trixagus;Trixagus carinifrons;Bulgaria;Bold;GMBUB1566-14;-  
 Coleoptera;Throscidae;Trixagus;Trixagus carinifrons;Norway;Bold;GMNWF2029-14;-  
 Coleoptera;Throscidae;Trixagus;Trixagus carinifrons;Bulgaria;Bold;GMBUA1457-14;-  
 Coleoptera;Throscidae;Trixagus;Trixagus carinifrons;Norway;Bold;GMNWF3483-14;-  
 Coleoptera;Throscidae;Trixagus;Trixagus carinifrons;Norway;Bold;GMNWF3166-14;-  
 Coleoptera;Throscidae;Trixagus;Trixagus carinifrons;Norway;Bold;GMNWF2542-14;-  
 Coleoptera;Throscidae;Trixagus;Trixagus carinifrons;Norway;Bold;GMNWF3267-14;-  
 Coleoptera;Throscidae;Trixagus;Trixagus carinifrons;Norway;Bold;GMNWF3287-14;-  
 Coleoptera;Throscidae;Trixagus;Trixagus carinifrons;Finland;Bold;COLFH534-15;-  
 Coleoptera;Throscidae;Trixagus;Trixagus carinifrons;Norway;Bold;GMNWF3049-14;-  
 Coleoptera;Throscidae;Trixagus;Trixagus carinifrons;Norway;Bold;GMNWF2590-14;-  
 Coleoptera;Throscidae;Trixagus;Trixagus carinifrons;Norway;Bold;GMNWF3148-14;-  
 Coleoptera;Throscidae;Trixagus;Trixagus carinifrons;Norway;Bold;GMNWF3048-14;-  
 Coleoptera;Throscidae;Trixagus;Trixagus carinifrons;Norway;Bold;GMNWF3254-14;-  
 Coleoptera;Throscidae;Trixagus;Trixagus carinifrons;Norway;Bold;GMNWF3127-14;-  
 Coleoptera;Throscidae;Trixagus;Trixagus carinifrons;Norway;Bold;GMNWF3261-14;-  
 Coleoptera;Throscidae;Trixagus;Trixagus carinifrons;Belarus;Bold;GMBMJ1850-17;-  
 Coleoptera;Throscidae;Trixagus;Trixagus carinifrons;Norway;Bold;GMNWF3165-14;-  
 Coleoptera;Throscidae;Trixagus;Trixagus carinifrons;Belarus;Bold;GMBMP1985-18;-  
 Coleoptera;Throscidae;Trixagus;Trixagus carinifrons;Norway;Bold;GMNWF3139-14;-  
 Coleoptera;Throscidae;Trixagus;Trixagus carinifrons;Belarus;Bold;GMBMJ1856-17;-  
 Coleoptera;Throscidae;Trixagus;Trixagus carinifrons;Belarus;Bold;GMBMP1946-18;-  
 Coleoptera;Throscidae;Trixagus;Trixagus carinifrons;Belarus;Bold;GMBMK402-17;-  
 Coleoptera;Throscidae;Trixagus;Trixagus carinifrons;Belarus;Bold;GMBMJ1854-17;-  
 Coleoptera;Throscidae;Trixagus;Trixagus carinifrons;Belarus;Bold;GMBMK378-17;-  
 Coleoptera;Throscidae;Trixagus;Trixagus carinifrons;Belarus;Bold;GMBMP1961-18;-  
 Coleoptera;Throscidae;Trixagus;Trixagus carinifrons;Belarus;Bold;GMBMK373-17;-  
 Coleoptera;Throscidae;Trixagus;Trixagus carinifrons;Belarus;Bold;GMBMO816-17;-  
 Coleoptera;Throscidae;Trixagus;Trixagus carinifrons;Belarus;Bold;GMBMM1061-17;-  
 Coleoptera;Throscidae;Trixagus;Trixagus carinifrons;Belarus;Bold;GMBMP1971-18;-  
 Coleoptera;Throscidae;Trixagus;Trixagus carinifrons;Belarus;Bold;GMBMP1999-18;-  
 Coleoptera;Throscidae;Trixagus;Trixagus carinifrons;Belarus;Bold;GMBMP1930-18;-  
 Coleoptera;Throscidae;Trixagus;Trixagus carinifrons;Belarus;Bold;GMBMQ1006-17;-  
 Coleoptera;Throscidae;Trixagus;Trixagus carinifrons;Belarus;Bold;GMBMM1068-17;-  
 Coleoptera;Throscidae;Trixagus;Trixagus carinifrons;Belarus;Bold;GMBMK391-17;-  
 Coleoptera;Throscidae;Trixagus;Trixagus carinifrons;Belarus;Bold;GMBMP1889-18;-  
 Coleoptera;Throscidae;Trixagus;Trixagus carinifrons;Belarus;Bold;GMBMK358-17;-  
 Coleoptera;Throscidae;Trixagus;Trixagus carinifrons;Belarus;Bold;GMBMK369-17;-  
 Coleoptera;Throscidae;Trixagus;Trixagus carinifrons;Belarus;Bold;GMBMP2006-18;-  
 Coleoptera;Throscidae;Trixagus;Trixagus carinifrons;Belarus;Bold;GMBMP2002-18;-

Coleoptera;Throscidae;Trixagus;Trixagus carinifrons;Belarus;Bold;GMBMK343-17;-  
 Coleoptera;Throscidae;Trixagus;Trixagus carinifrons;Belarus;Bold;GMBMK388-17;-  
 Coleoptera;Throscidae;Trixagus;Trixagus carinifrons;Belarus;Bold;GMBMK337-17;-  
 Coleoptera;Throscidae;Trixagus;Trixagus carinifrons;Belarus;Bold;GMBMP1920-18;-  
 Coleoptera;Throscidae;Trixagus;Trixagus carinifrons;Belarus;Bold;GMBMO782-17;-  
 Coleoptera;Throscidae;Trixagus;Trixagus carinifrons;Belarus;Bold;GMBMK382-17;-  
 Coleoptera;Throscidae;Trixagus;Trixagus carinifrons;Belarus;Bold;GMBMJ1860-17;-  
 Coleoptera;Throscidae;Trixagus;Trixagus carinifrons;Belarus;Bold;GMBMJ1826-17;-  
 Coleoptera;Throscidae;Trixagus;Trixagus carinifrons;Belarus;Bold;GMBMO814-17;-  
 Coleoptera;Throscidae;Trixagus;Trixagus carinifrons;Belarus;Bold;GMBMP2015-18;-  
 Coleoptera;Throscidae;Trixagus;Trixagus carinifrons;Belarus;Bold;GMBMK379-17;-  
 Coleoptera;Throscidae;Trixagus;Trixagus carinifrons;Belarus;Bold;GMBMR1357-17;-  
 Coleoptera;Throscidae;Trixagus;Trixagus carinifrons;Belarus;Bold;GMBMJ1827-17;-  
 Coleoptera;Throscidae;Trixagus;Trixagus carinifrons;Belarus;Bold;GMBMP1991-18;-  
 Coleoptera;Throscidae;Trixagus;Trixagus carinifrons;Belarus;Bold;GMBMP1888-18;-  
 Coleoptera;Throscidae;Trixagus;Trixagus carinifrons;Belarus;Bold;GMBMP2020-18;-  
 Coleoptera;Throscidae;Trixagus;Trixagus carinifrons;Belarus;Bold;GMBMP1933-18;-  
 Coleoptera;Throscidae;Trixagus;Trixagus carinifrons;Belarus;Bold;GMBMP1956-18;-  
 Coleoptera;Throscidae;Trixagus;Trixagus carinifrons;Belarus;Bold;GMBMO788-17;-  
 Coleoptera;Throscidae;Trixagus;Trixagus carinifrons;Belarus;Bold;GMBMP2027-18;-  
 Coleoptera;Throscidae;Trixagus;Trixagus carinifrons;Belarus;Bold;GMBMJ1853-17;-  
 Coleoptera;Throscidae;Trixagus;Trixagus carinifrons;Belarus;Bold;GMBMO773-17;-  
 Coleoptera;Throscidae;Trixagus;Trixagus carinifrons;Belarus;Bold;GMBMK390-17;-  
 Coleoptera;Throscidae;Trixagus;Trixagus carinifrons;Belarus;Bold;GMBMP1976-18;-  
 Coleoptera;Throscidae;Trixagus;Trixagus carinifrons;Belarus;Bold;GMBMP1915-18;-  
 Coleoptera;Throscidae;Trixagus;Trixagus carinifrons;Belarus;Bold;GMBMJ1849-17;-  
 Coleoptera;Throscidae;Trixagus;Trixagus carinifrons;Belarus;Bold;GMBMP1907-18;-  
 Coleoptera;Throscidae;Trixagus;Trixagus carinifrons;Belarus;Bold;GMBMP1900-18;-  
 Coleoptera;Throscidae;Trixagus;Trixagus carinifrons;Belarus;Bold;GMBMP1994-18;-  
 Coleoptera;Throscidae;Trixagus;Trixagus carinifrons;Belarus;Bold;GMBMP2003-18;-  
 Coleoptera;Throscidae;Trixagus;Trixagus carinifrons;Belarus;Bold;GMBML413-17;-  
 Coleoptera;Throscidae;Trixagus;Trixagus carinifrons;Norway;Bold;GMNWI3298-14;-  
 Coleoptera;Throscidae;Trixagus;Trixagus carinifrons;Belarus;Bold;GMBMJ1862-17;-  
 Coleoptera;Throscidae;Trixagus;Trixagus carinifrons;Belarus;Bold;GMBMP1902-18;-  
 Coleoptera;Throscidae;Trixagus;Trixagus carinifrons;Norway;Bold;GMNWF2019-14;-  
 Coleoptera;Throscidae;Trixagus;Trixagus carinifrons;Belarus;Bold;GMBMP1958-18;-  
 Coleoptera;Throscidae;Trixagus;Trixagus carinifrons;Belarus;Bold;GMBMK376-17;-  
 Coleoptera;Throscidae;Trixagus;Trixagus carinifrons;Belarus;Bold;GMBMJ1861-17;-  
 Coleoptera;Throscidae;Trixagus;Trixagus carinifrons;Belarus;Bold;GMBMJ1838-17;-  
 Coleoptera;Throscidae;Trixagus;Trixagus carinifrons;Belarus;Bold;GMBMP1899-18;-  
 Coleoptera;Throscidae;Trixagus;Trixagus carinifrons;Belarus;Bold;GMBMP1947-18;-  
 Coleoptera;Throscidae;Trixagus;Trixagus carinifrons;Belarus;Bold;GMBMK405-17;-  
 Coleoptera;Throscidae;Trixagus;Trixagus carinifrons;Belarus;Bold;GMBMP1919-18;-  
 Coleoptera;Throscidae;Trixagus;Trixagus carinifrons;Belarus;Bold;GMBMK339-17;-  
 Coleoptera;Throscidae;Trixagus;Trixagus carinifrons;Belarus;Bold;GMBMO793-17;-  
 Coleoptera;Throscidae;Trixagus;Trixagus carinifrons;Belarus;Bold;GMBMR1369-17;-  
 Coleoptera;Throscidae;Trixagus;Trixagus carinifrons;Belarus;Bold;GMBMJ1843-17;-  
 Coleoptera;Throscidae;Trixagus;Trixagus carinifrons;Belarus;Bold;GMBMJ1547-17;-  
 Coleoptera;Throscidae;Trixagus;Trixagus carinifrons;Belarus;Bold;GMBMJ1864-17;-  
 Coleoptera;Throscidae;Trixagus;Trixagus carinifrons;Belarus;Bold;GMBMP2023-18;-  
 Coleoptera;Throscidae;Trixagus;Trixagus carinifrons;Belarus;Bold;GMBMK392-17;-  
 Coleoptera;Throscidae;Trixagus;Trixagus carinifrons;Belarus;Bold;GMBMO844-17;-  
 Coleoptera;Throscidae;Trixagus;Trixagus carinifrons;Belarus;Bold;GMBMK406-17;-  
 Coleoptera;Throscidae;Trixagus;Trixagus carinifrons;Belarus;Bold;GMBMJ1851-17;-  
 Coleoptera;Throscidae;Trixagus;Trixagus carinifrons;Belarus;Bold;GMBMJ1863-17;-  
 Coleoptera;Throscidae;Trixagus;Trixagus carinifrons;Belarus;Bold;GMBMP1986-18;-  
 Coleoptera;Throscidae;Trixagus;Trixagus carinifrons;Belarus;Bold;GMBMP1936-18;-  
 Coleoptera;Throscidae;Trixagus;Trixagus leseigneuri;Belarus;Bold;GMBMJ1825-17;-  
 Coleoptera;Throscidae;Trixagus;Trixagus leseigneuri;Belarus;Bold;GMBMJ1844-17;-  
 Coleoptera;Throscidae;Trixagus;Trixagus leseigneuri;Belarus;Bold;GMBMJ1839-17;-  
 Coleoptera;Throscidae;Trixagus;Trixagus leseigneuri;Belarus;Bold;GMBMJ1829-17;-  
 Coleoptera;Throscidae;Trixagus;Trixagus leseigneuri;Belarus;Bold;GMBMJ1842-17;-  
 Coleoptera;Throscidae;Trixagus;Trixagus leseigneuri;Belarus;Bold;GMBMJ1867-17;-  
 Coleoptera;Throscidae;Trixagus;Trixagus leseigneuri;Belarus;Bold;GMBMJ1845-17;-  
 Coleoptera;Throscidae;Trixagus;Trixagus leseigneuri;Belarus;Bold;GMBMJ1846-17;-  
 Coleoptera;Throscidae;Trixagus;Trixagus leseigneuri;Belarus;Bold;GMBMJ1543-17;-  
 Coleoptera;Throscidae;Trixagus;Trixagus leseigneuri;Belarus;Bold;GMBMJ1542-17;-  
 Coleoptera;Curculionidae;Trypodendron lineatum;Norway;Bold;SCOL061-12;-  
 Coleoptera;Curculionidae;Trypodendron lineatum;Norway;Bold;SCOL013-12;-  
 Coleoptera;Tenebrionidae;Uloma;Uloma culinaris;Austria;Bold;TDAOE327-21;-  
 Coleoptera;Scarabaeidae;Valgus;Valgus hemipterus;Austria;Bold;TDAOE356-21;-  
 Coleoptera;Curculionidae;Xyleborinus;Xyleborinus saxesenii;Belarus;Bold;GMBMJ1822-17;-  
 Coleoptera;Curculionidae;Xyleborus;Xyleborus cryptographus;Norway;Bold;NOCPLP1788-19;-  
 Coleoptera;Curculionidae;Xylocleptes;Xylocleptes bispinus;Ukraine;Bold;SCOL206-12;-  
 ;;;;  
 ;;;;



Appendix\_5\_DataRemoved\_after\_sequence\_assignment;;;;;  
accession\_number;order\_name;gene;;;;  
EF028525;Hymenoptera;COI;;;;  
JQ909721;Hymenoptera;COI;;;;  
JQ909722;Hymenoptera;COI;;;;  
JQ909723;Hymenoptera;COI;;;;  
JQ909724;Hymenoptera;COI;;;;  
JX256662;Hymenoptera;COI;;;;  
JX256691;Hymenoptera;COI;;;;  
JX256692;Hymenoptera;COI;;;;  
KJ836927;Hymenoptera;COI;;;;  
KJ837172;Hymenoptera;COI;;;;  
KJ837296;Hymenoptera;COI;;;;  
KJ837411;Hymenoptera;COI;;;;  
KJ837472;Hymenoptera;COI;;;;  
KJ837608;Hymenoptera;COI;;;;  
KJ837651;Hymenoptera;COI;;;;  
KJ838205;Hymenoptera;COI;;;;  
KJ838215;Hymenoptera;COI;;;;  
KJ838720;Hymenoptera;COI;;;;  
KJ838852;Hymenoptera;COI;;;;  
KJ839028;Hymenoptera;COI;;;;  
KJ839453;Hymenoptera;COI;;;;  
KJ839594;Hymenoptera;COI;;;;  
KJ839610;Hymenoptera;COI;;;;  
KJ839693;Hymenoptera;COI;;;;  
MH271384;Hymenoptera;COI;;;;  
MH271385;Hymenoptera;COI;;;;  
MH319126;Hymenoptera;COI;;;;  
MH458485;Hymenoptera;COI;;;;  
MZ628821;Hymenoptera;COI;;;;  
AB674372;Lepidoptera;COI;;;;  
AB674373;Lepidoptera;COI;;;;  
AB674374;Lepidoptera;COI;;;;  
AB674375;Lepidoptera;COI;;;;  
AB674376;Lepidoptera;COI;;;;  
AB674377;Lepidoptera;COI;;;;  
AB674380;Lepidoptera;COI;;;;  
AB674381;Lepidoptera;COI;;;;  
AB674382;Lepidoptera;COI;;;;  
AF408187;Lepidoptera;COI;;;;  
AF408188;Lepidoptera;COI;;;;  
AF408189;Lepidoptera;COI;;;;  
AF408191;Lepidoptera;COI;;;;  
AF408192;Lepidoptera;COI;;;;  
AY346221;Lepidoptera;COI;;;;  
AY346222;Lepidoptera;COI;;;;  
AY346223;Lepidoptera;COI;;;;  
AY346224;Lepidoptera;COI;;;;  
AY346225;Lepidoptera;COI;;;;  
AY346226;Lepidoptera;COI;;;;  
AY346227;Lepidoptera;COI;;;;  
AY346228;Lepidoptera;COI;;;;  
AY346230;Lepidoptera;COI;;;;  
AY350455;Lepidoptera;COI;;;;  
AY350456;Lepidoptera;COI;;;;  
AY350457;Lepidoptera;COI;;;;  
AY350457;Lepidoptera;COI;;;;  
AY350458;Lepidoptera;COI;;;;  
AY350458;Lepidoptera;COI;;;;  
AY350459;Lepidoptera;COI;;;;  
AY350459;Lepidoptera;COI;;;;  
AY350462;Lepidoptera;COI;;;;  
AY350467;Lepidoptera;COI;;;;  
AY350468;Lepidoptera;COI;;;;  
AY350469;Lepidoptera;COI;;;;  
AY350470;Lepidoptera;COI;;;;  
AY350471;Lepidoptera;COI;;;;  
AY350472;Lepidoptera;COI;;;;  
AY350473;Lepidoptera;COI;;;;  
AY350474;Lepidoptera;COI;;;;  
AY350475;Lepidoptera;COI;;;;  
AY350476;Lepidoptera;COI;;;;  
AY350477;Lepidoptera;COI;;;;  
AY350478;Lepidoptera;COI;;;;  
AY350479;Lepidoptera;COI;;;;  
AY556945;Lepidoptera;COI;;;;  
AY556965;Lepidoptera;COI;;;;

AY556994;Lepidoptera;COI;;;;  
AY557034;Lepidoptera;COI;;;;  
AY557043;Lepidoptera;COI;;;;  
AY557126;Lepidoptera;COI;;;;  
AY557130;Lepidoptera;COI;;;;  
AY557133;Lepidoptera;COI;;;;  
AY557133;Lepidoptera;COI;;;;  
AY585886;Lepidoptera;COI;;;;  
AY585887;Lepidoptera;COI;;;;  
AY585889;Lepidoptera;COI;;;;  
AY585890;Lepidoptera;COI;;;;  
AY585891;Lepidoptera;COI;;;;  
AY675402;Lepidoptera;COI;;;;  
AY675406;Lepidoptera;COI;;;;  
AY675407;Lepidoptera;COI;;;;  
AY675413;Lepidoptera;COI;;;;  
AY675414;Lepidoptera;COI;;;;  
AY675415;Lepidoptera;COI;;;;  
AY675415;Lepidoptera;COI;;;;  
AY675416;Lepidoptera;COI;;;;  
AY675417;Lepidoptera;COI;;;;  
AY675418;Lepidoptera;COI;;;;  
AY675422;Lepidoptera;COI;;;;  
AY675428;Lepidoptera;COI;;;;  
AY675429;Lepidoptera;COI;;;;  
AY675430;Lepidoptera;COI;;;;  
AY675431;Lepidoptera;COI;;;;  
AY675432;Lepidoptera;COI;;;;  
AY675433;Lepidoptera;COI;;;;  
AY675434;Lepidoptera;COI;;;;  
AY675434;Lepidoptera;COI;;;;  
AY675435;Lepidoptera;COI;;;;  
AY675435;Lepidoptera;COI;;;;  
AY675436;Lepidoptera;COI;;;;  
AY675445;Lepidoptera;COI;;;;  
AY675447;Lepidoptera;COI;;;;  
AY675448;Lepidoptera;COI;;;;  
DQ008089;Lepidoptera;COI;;;;  
DQ205105;Lepidoptera;COI;;;;  
DQ351039;Lepidoptera;COI;;;;  
DQ384004;Lepidoptera;COI;;;;  
DQ384007;Lepidoptera;COI;;;;  
DQ384008;Lepidoptera;COI;;;;  
DQ407763;Lepidoptera;COI;;;;  
DQ463398;Lepidoptera;COI;;;;  
DQ875939;Lepidoptera;COI;;;;  
DQ875939;Lepidoptera;COI;;;;  
DQ875940;Lepidoptera;COI;;;;  
EU037851;Lepidoptera;COI;;;;  
EU037852;Lepidoptera;COI;;;;  
EU037853;Lepidoptera;COI;;;;  
EU037854;Lepidoptera;COI;;;;  
EU037855;Lepidoptera;COI;;;;  
EU037856;Lepidoptera;COI;;;;  
EU037857;Lepidoptera;COI;;;;  
EU037858;Lepidoptera;COI;;;;  
EU037859;Lepidoptera;COI;;;;  
EU037860;Lepidoptera;COI;;;;  
EU037861;Lepidoptera;COI;;;;  
EU037862;Lepidoptera;COI;;;;  
EU037863;Lepidoptera;COI;;;;  
EU037864;Lepidoptera;COI;;;;  
EU037865;Lepidoptera;COI;;;;  
EU037866;Lepidoptera;COI;;;;  
EU037884;Lepidoptera;COI;;;;  
EU037885;Lepidoptera;COI;;;;  
EU037886;Lepidoptera;COI;;;;  
EU037887;Lepidoptera;COI;;;;  
EU037889;Lepidoptera;COI;;;;  
EU364380;Lepidoptera;COI;;;;  
EU364381;Lepidoptera;COI;;;;  
EU597131;Lepidoptera;COI;;;;  
EU597132;Lepidoptera;COI;;;;  
EU597133;Lepidoptera;COI;;;;  
EU597136;Lepidoptera;COI;;;;  
EU597137;Lepidoptera;COI;;;;  
EU597138;Lepidoptera;COI;;;;  
EU597139;Lepidoptera;COI;;;;

EU597140;Lepidoptera;COI;;;;  
EU597141;Lepidoptera;COI;;;;  
EU700961;Lepidoptera;COI;;;;  
EU700962;Lepidoptera;COI;;;;  
EU700963;Lepidoptera;COI;;;;  
EU700964;Lepidoptera;COI;;;;  
EU836659;Lepidoptera;COI;;;;  
EU836662;Lepidoptera;COI;;;;  
EU836663;Lepidoptera;COI;;;;  
EU836669;Lepidoptera;COI;;;;  
EU919314;Lepidoptera;COI;;;;  
EU919315;Lepidoptera;COI;;;;  
FJ428801;Lepidoptera;COI;;;;  
FJ428802;Lepidoptera;COI;;;;  
FJ428803;Lepidoptera;COI;;;;  
FJ428806;Lepidoptera;COI;;;;  
FJ428808;Lepidoptera;COI;;;;  
FJ428809;Lepidoptera;COI;;;;  
FJ428820;Lepidoptera;COI;;;;  
FJ428822;Lepidoptera;COI;;;;  
FJ428825;Lepidoptera;COI;;;;  
FJ628426;Lepidoptera;COI;;;;  
FJ628436;Lepidoptera;COI;;;;  
FJ628445;Lepidoptera;COI;;;;  
FJ628446;Lepidoptera;COI;;;;  
FJ663412;Lepidoptera;COI;;;;  
FJ663413;Lepidoptera;COI;;;;  
FJ663414;Lepidoptera;COI;;;;  
FJ663563;Lepidoptera;COI;;;;  
FJ663564;Lepidoptera;COI;;;;  
FJ663572;Lepidoptera;COI;;;;  
FJ663573;Lepidoptera;COI;;;;  
FJ663746;Lepidoptera;COI;;;;  
FJ663747;Lepidoptera;COI;;;;  
FJ663748;Lepidoptera;COI;;;;  
FJ663757;Lepidoptera;COI;;;;  
FJ663758;Lepidoptera;COI;;;;  
FJ663759;Lepidoptera;COI;;;;  
FJ663760;Lepidoptera;COI;;;;  
FJ663955;Lepidoptera;COI;;;;  
FJ663956;Lepidoptera;COI;;;;  
FJ663957;Lepidoptera;COI;;;;  
FJ663958;Lepidoptera;COI;;;;  
FJ663959;Lepidoptera;COI;;;;  
FJ663976;Lepidoptera;COI;;;;  
FJ663977;Lepidoptera;COI;;;;  
FJ663978;Lepidoptera;COI;;;;  
FJ663979;Lepidoptera;COI;;;;  
FJ943961;Lepidoptera;COI;;;;  
FN601259;Lepidoptera;COI;;;;  
FN601260;Lepidoptera;COI;;;;  
FN601274;Lepidoptera;COI;;;;  
FN601285;Lepidoptera;COI;;;;  
FN601301;Lepidoptera;COI;;;;  
FN601308;Lepidoptera;COI;;;;  
FN601312;Lepidoptera;COI;;;;  
FN601319;Lepidoptera;COI;;;;  
FN601329;Lepidoptera;COI;;;;  
FN601330;Lepidoptera;COI;;;;  
GQ128942;Lepidoptera;COI;;;;  
GQ128945;Lepidoptera;COI;;;;  
GQ128947;Lepidoptera;COI;;;;  
GQ128953;Lepidoptera;COI;;;;  
GQ128976;Lepidoptera;COI;;;;  
GQ128992;Lepidoptera;COI;;;;  
GQ201114;Lepidoptera;COI;;;;  
GQ885173;Lepidoptera;COI;;;;  
GU215766;Lepidoptera;COI;;;;  
GU215767;Lepidoptera;COI;;;;  
GU215768;Lepidoptera;COI;;;;  
GU215769;Lepidoptera;COI;;;;  
GU215770;Lepidoptera;COI;;;;  
GU215771;Lepidoptera;COI;;;;  
GU215772;Lepidoptera;COI;;;;  
GU215773;Lepidoptera;COI;;;;  
GU215774;Lepidoptera;COI;;;;  
GU215775;Lepidoptera;COI;;;;  
GU215776;Lepidoptera;COI;;;;

GU215777;Lepidoptera;COI;;;;  
GU215778;Lepidoptera;COI;;;;  
GU215779;Lepidoptera;COI;;;;  
GU215780;Lepidoptera;COI;;;;  
GU215781;Lepidoptera;COI;;;;  
GU215782;Lepidoptera;COI;;;;  
GU215783;Lepidoptera;COI;;;;  
GU215784;Lepidoptera;COI;;;;  
GU215785;Lepidoptera;COI;;;;  
GU215786;Lepidoptera;COI;;;;  
GU215787;Lepidoptera;COI;;;;  
GU215788;Lepidoptera;COI;;;;  
GU215789;Lepidoptera;COI;;;;  
GU244492;Lepidoptera;COI;;;;  
GU559737;Lepidoptera;COI;;;;  
GU655006;Lepidoptera;COI;;;;  
GU655007;Lepidoptera;COI;;;;  
GU655025;Lepidoptera;COI;;;;  
GU668031;Lepidoptera;COI;;;;  
GU668032;Lepidoptera;COI;;;;  
GU669600;Lepidoptera;COI;;;;  
GU669600;Lepidoptera;COI;;;;  
GU669601;Lepidoptera;COI;;;;  
GU669601;Lepidoptera;COI;;;;  
GU669602;Lepidoptera;COI;;;;  
GU669602;Lepidoptera;COI;;;;  
GU669603;Lepidoptera;COI;;;;  
GU669603;Lepidoptera;COI;;;;  
GU669609;Lepidoptera;COI;;;;  
GU669610;Lepidoptera;COI;;;;  
GU669616;Lepidoptera;COI;;;;  
GU669624;Lepidoptera;COI;;;;  
GU669739;Lepidoptera;COI;;;;  
GU669740;Lepidoptera;COI;;;;  
GU669741;Lepidoptera;COI;;;;  
GU669818;Lepidoptera;COI;;;;  
GU669819;Lepidoptera;COI;;;;  
GU669823;Lepidoptera;COI;;;;  
GU669824;Lepidoptera;COI;;;;  
GU669825;Lepidoptera;COI;;;;  
GU669837;Lepidoptera;COI;;;;  
GU669837;Lepidoptera;COI;;;;  
GU670786;Lepidoptera;COI;;;;  
GU670791;Lepidoptera;COI;;;;  
GU670792;Lepidoptera;COI;;;;  
GU670793;Lepidoptera;COI;;;;  
GU670798;Lepidoptera;COI;;;;  
GU670799;Lepidoptera;COI;;;;  
GU670801;Lepidoptera;COI;;;;  
GU670804;Lepidoptera;COI;;;;  
GU670809;Lepidoptera;COI;;;;  
GU670813;Lepidoptera;COI;;;;  
GU670815;Lepidoptera;COI;;;;  
GU670817;Lepidoptera;COI;;;;  
GU670818;Lepidoptera;COI;;;;  
GU670821;Lepidoptera;COI;;;;  
GU670822;Lepidoptera;COI;;;;  
GU675633;Lepidoptera;COI;;;;  
GU675671;Lepidoptera;COI;;;;  
GU675671;Lepidoptera;COI;;;;  
GU675672;Lepidoptera;COI;;;;  
GU675672;Lepidoptera;COI;;;;  
GU675677;Lepidoptera;COI;;;;  
GU675696;Lepidoptera;COI;;;;  
GU675700;Lepidoptera;COI;;;;  
GU675700;Lepidoptera;COI;;;;  
GU675712;Lepidoptera;COI;;;;  
GU675742;Lepidoptera;COI;;;;  
GU675743;Lepidoptera;COI;;;;  
GU675744;Lepidoptera;COI;;;;  
GU675758;Lepidoptera;COI;;;;  
GU675759;Lepidoptera;COI;;;;  
GU675764;Lepidoptera;COI;;;;  
GU675774;Lepidoptera;COI;;;;  
GU675800;Lepidoptera;COI;;;;  
GU675825;Lepidoptera;COI;;;;  
GU675826;Lepidoptera;COI;;;;  
GU675851;Lepidoptera;COI;;;;

GU675852;Lepidoptera;COI;;;;  
GU675896;Lepidoptera;COI;;;;  
GU675896;Lepidoptera;COI;;;;  
GU675936;Lepidoptera;COI;;;;  
GU675938;Lepidoptera;COI;;;;  
GU675957;Lepidoptera;COI;;;;  
GU675960;Lepidoptera;COI;;;;  
GU675975;Lepidoptera;COI;;;;  
GU675976;Lepidoptera;COI;;;;  
GU675977;Lepidoptera;COI;;;;  
GU675977;Lepidoptera;COI;;;;  
GU676017;Lepidoptera;COI;;;;  
GU676020;Lepidoptera;COI;;;;  
GU676041;Lepidoptera;COI;;;;  
GU676041;Lepidoptera;COI;;;;  
GU676088;Lepidoptera;COI;;;;  
GU676091;Lepidoptera;COI;;;;  
GU676169;Lepidoptera;COI;;;;  
GU676209;Lepidoptera;COI;;;;  
GU676228;Lepidoptera;COI;;;;  
GU676228;Lepidoptera;COI;;;;  
GU676236;Lepidoptera;COI;;;;  
GU676236;Lepidoptera;COI;;;;  
GU676277;Lepidoptera;COI;;;;  
GU676304;Lepidoptera;COI;;;;  
GU676351;Lepidoptera;COI;;;;  
GU676352;Lepidoptera;COI;;;;  
GU676362;Lepidoptera;COI;;;;  
GU676363;Lepidoptera;COI;;;;  
GU676368;Lepidoptera;COI;;;;  
GU676368;Lepidoptera;COI;;;;  
GU676373;Lepidoptera;COI;;;;  
GU676373;Lepidoptera;COI;;;;  
GU676377;Lepidoptera;COI;;;;  
GU676377;Lepidoptera;COI;;;;  
GU676383;Lepidoptera;COI;;;;  
GU676383;Lepidoptera;COI;;;;  
GU676408;Lepidoptera;COI;;;;  
GU676408;Lepidoptera;COI;;;;  
GU676425;Lepidoptera;COI;;;;  
GU676490;Lepidoptera;COI;;;;  
GU676490;Lepidoptera;COI;;;;  
GU676500;Lepidoptera;COI;;;;  
GU676516;Lepidoptera;COI;;;;  
GU676556;Lepidoptera;COI;;;;  
GU676558;Lepidoptera;COI;;;;  
GU676716;Lepidoptera;COI;;;;  
GU676734;Lepidoptera;COI;;;;  
GU676825;Lepidoptera;COI;;;;  
GU676826;Lepidoptera;COI;;;;  
GU676831;Lepidoptera;COI;;;;  
GU676832;Lepidoptera;COI;;;;  
GU676892;Lepidoptera;COI;;;;  
GU676893;Lepidoptera;COI;;;;  
GU676910;Lepidoptera;COI;;;;  
GU676956;Lepidoptera;COI;;;;  
GU676970;Lepidoptera;COI;;;;  
GU676970;Lepidoptera;COI;;;;  
GU676990;Lepidoptera;COI;;;;  
GU676991;Lepidoptera;COI;;;;  
GU677010;Lepidoptera;COI;;;;  
GU677010;Lepidoptera;COI;;;;  
GU677011;Lepidoptera;COI;;;;  
GU677011;Lepidoptera;COI;;;;  
GU686975;Lepidoptera;COI;;;;  
GU687045;Lepidoptera;COI;;;;  
GU687046;Lepidoptera;COI;;;;  
GU687048;Lepidoptera;COI;;;;  
GU688446;Lepidoptera;COI;;;;  
GU688446;Lepidoptera;COI;;;;  
GU688453;Lepidoptera;COI;;;;  
GU688454;Lepidoptera;COI;;;;  
GU688456;Lepidoptera;COI;;;;  
GU688470;Lepidoptera;COI;;;;  
GU688507;Lepidoptera;COI;;;;  
GU688510;Lepidoptera;COI;;;;  
GU688532;Lepidoptera;COI;;;;  
GU688532;Lepidoptera;COI;;;;

GU689149;Lepidoptera;COI;;;;  
GU707036;Lepidoptera;COI;;;;  
GU707088;Lepidoptera;COI;;;;  
GU707090;Lepidoptera;COI;;;;  
GU707115;Lepidoptera;COI;;;;  
GU707134;Lepidoptera;COI;;;;  
GU707145;Lepidoptera;COI;;;;  
GU707194;Lepidoptera;COI;;;;  
GU707266;Lepidoptera;COI;;;;  
GU707371;Lepidoptera;COI;;;;  
GU828690;Lepidoptera;COI;;;;  
GU947444;Lepidoptera;COI;;;;  
GU947445;Lepidoptera;COI;;;;  
GU947447;Lepidoptera;COI;;;;  
GU947448;Lepidoptera;COI;;;;  
GU947449;Lepidoptera;COI;;;;  
GU947450;Lepidoptera;COI;;;;  
GU947451;Lepidoptera;COI;;;;  
GU947452;Lepidoptera;COI;;;;  
GU947453;Lepidoptera;COI;;;;  
GU947454;Lepidoptera;COI;;;;  
GU947455;Lepidoptera;COI;;;;  
GU947456;Lepidoptera;COI;;;;  
GU947458;Lepidoptera;COI;;;;  
GU947459;Lepidoptera;COI;;;;  
GU947460;Lepidoptera;COI;;;;  
GU947461;Lepidoptera;COI;;;;  
GU947462;Lepidoptera;COI;;;;  
GU947463;Lepidoptera;COI;;;;  
GU947464;Lepidoptera;COI;;;;  
GU947468;Lepidoptera;COI;;;;  
GU947473;Lepidoptera;COI;;;;  
GU947474;Lepidoptera;COI;;;;  
GU947475;Lepidoptera;COI;;;;  
GU947478;Lepidoptera;COI;;;;  
GU947487;Lepidoptera;COI;;;;  
GU947488;Lepidoptera;COI;;;;  
GU947489;Lepidoptera;COI;;;;  
GU947490;Lepidoptera;COI;;;;  
GU947491;Lepidoptera;COI;;;;  
GU947492;Lepidoptera;COI;;;;  
GU947493;Lepidoptera;COI;;;;  
GU947494;Lepidoptera;COI;;;;  
GU947495;Lepidoptera;COI;;;;  
GU947496;Lepidoptera;COI;;;;  
GU947497;Lepidoptera;COI;;;;  
GU947498;Lepidoptera;COI;;;;  
GU947499;Lepidoptera;COI;;;;  
GU947501;Lepidoptera;COI;;;;  
GU947502;Lepidoptera;COI;;;;  
GU947503;Lepidoptera;COI;;;;  
GU947504;Lepidoptera;COI;;;;  
GU947505;Lepidoptera;COI;;;;  
GU947506;Lepidoptera;COI;;;;  
GU947507;Lepidoptera;COI;;;;  
GU947508;Lepidoptera;COI;;;;  
GU947509;Lepidoptera;COI;;;;  
GU947510;Lepidoptera;COI;;;;  
GU947511;Lepidoptera;COI;;;;  
GU947512;Lepidoptera;COI;;;;  
GU947513;Lepidoptera;COI;;;;  
GU947514;Lepidoptera;COI;;;;  
GU947515;Lepidoptera;COI;;;;  
GU947516;Lepidoptera;COI;;;;  
GU947517;Lepidoptera;COI;;;;  
GU947518;Lepidoptera;COI;;;;  
GU947519;Lepidoptera;COI;;;;  
GU947520;Lepidoptera;COI;;;;  
GU947521;Lepidoptera;COI;;;;  
GU947522;Lepidoptera;COI;;;;  
GU947523;Lepidoptera;COI;;;;  
GU947524;Lepidoptera;COI;;;;  
GU947525;Lepidoptera;COI;;;;  
GU947526;Lepidoptera;COI;;;;  
GU947527;Lepidoptera;COI;;;;  
GU947528;Lepidoptera;COI;;;;  
GU947529;Lepidoptera;COI;;;;  
GU947530;Lepidoptera;COI;;;;

GU947531;Lepidoptera;COI;;;;  
GU947532;Lepidoptera;COI;;;;  
GU947533;Lepidoptera;COI;;;;  
GU947534;Lepidoptera;COI;;;;  
GU947535;Lepidoptera;COI;;;;  
GU947536;Lepidoptera;COI;;;;  
GU947537;Lepidoptera;COI;;;;  
GU947538;Lepidoptera;COI;;;;  
GU947539;Lepidoptera;COI;;;;  
GU947540;Lepidoptera;COI;;;;  
GU947541;Lepidoptera;COI;;;;  
GU947542;Lepidoptera;COI;;;;  
GU947543;Lepidoptera;COI;;;;  
GU947544;Lepidoptera;COI;;;;  
GU947545;Lepidoptera;COI;;;;  
GU947546;Lepidoptera;COI;;;;  
GU947547;Lepidoptera;COI;;;;  
GU947548;Lepidoptera;COI;;;;  
GU947549;Lepidoptera;COI;;;;  
GU947550;Lepidoptera;COI;;;;  
GU947551;Lepidoptera;COI;;;;  
GU947552;Lepidoptera;COI;;;;  
GU947553;Lepidoptera;COI;;;;  
GU947554;Lepidoptera;COI;;;;  
GU947555;Lepidoptera;COI;;;;  
GU947556;Lepidoptera;COI;;;;  
GU947557;Lepidoptera;COI;;;;  
GU947558;Lepidoptera;COI;;;;  
GU947559;Lepidoptera;COI;;;;  
GU947560;Lepidoptera;COI;;;;  
GU947561;Lepidoptera;COI;;;;  
GU947562;Lepidoptera;COI;;;;  
GU947563;Lepidoptera;COI;;;;  
GU947564;Lepidoptera;COI;;;;  
GU947565;Lepidoptera;COI;;;;  
GU947566;Lepidoptera;COI;;;;  
GU947567;Lepidoptera;COI;;;;  
GU947568;Lepidoptera;COI;;;;  
GU947569;Lepidoptera;COI;;;;  
GU947570;Lepidoptera;COI;;;;  
GU947571;Lepidoptera;COI;;;;  
GU947572;Lepidoptera;COI;;;;  
GU947573;Lepidoptera;COI;;;;  
GU947574;Lepidoptera;COI;;;;  
GU947575;Lepidoptera;COI;;;;  
GU947583;Lepidoptera;COI;;;;  
GU947584;Lepidoptera;COI;;;;  
GU947585;Lepidoptera;COI;;;;  
GU947586;Lepidoptera;COI;;;;  
GU947587;Lepidoptera;COI;;;;  
GU947588;Lepidoptera;COI;;;;  
GU947589;Lepidoptera;COI;;;;  
GU947591;Lepidoptera;COI;;;;  
GU947592;Lepidoptera;COI;;;;  
GU947593;Lepidoptera;COI;;;;  
GU947594;Lepidoptera;COI;;;;  
GU947595;Lepidoptera;COI;;;;  
GU947596;Lepidoptera;COI;;;;  
GU947597;Lepidoptera;COI;;;;  
GU947598;Lepidoptera;COI;;;;  
GU947599;Lepidoptera;COI;;;;  
GU947600;Lepidoptera;COI;;;;  
GU947614;Lepidoptera;COI;;;;  
GU947615;Lepidoptera;COI;;;;  
GU947618;Lepidoptera;COI;;;;  
GU947619;Lepidoptera;COI;;;;  
GU947622;Lepidoptera;COI;;;;  
GU947627;Lepidoptera;COI;;;;  
GU947632;Lepidoptera;COI;;;;  
GU947633;Lepidoptera;COI;;;;  
GU947634;Lepidoptera;COI;;;;  
GU947635;Lepidoptera;COI;;;;  
GU947637;Lepidoptera;COI;;;;  
HG969225;Lepidoptera;COI;;;;  
HM116932;Lepidoptera;COI;;;;  
HM116935;Lepidoptera;COI;;;;  
HM116939;Lepidoptera;COI;;;;  
HM159431;Lepidoptera;COI;;;;

HM210163;Lepidoptera;COI;;;;  
HM210163;Lepidoptera;COI;;;;  
HM210164;Lepidoptera;COI;;;;  
HM210164;Lepidoptera;COI;;;;  
HM210167;Lepidoptera;COI;;;;  
HM210167;Lepidoptera;COI;;;;  
HM210168;Lepidoptera;COI;;;;  
HM210168;Lepidoptera;COI;;;;  
HM210172;Lepidoptera;COI;;;;  
HM210172;Lepidoptera;COI;;;;  
HM391783;Lepidoptera;COI;;;;  
HM391817;Lepidoptera;COI;;;;  
HM391889;Lepidoptera;COI;;;;  
HM393176;Lepidoptera;COI;;;;  
HM393185;Lepidoptera;COI;;;;  
HM400986;Lepidoptera;COI;;;;  
HM400986;Lepidoptera;COI;;;;  
HM400987;Lepidoptera;COI;;;;  
HM400987;Lepidoptera;COI;;;;  
HM400988;Lepidoptera;COI;;;;  
HM400988;Lepidoptera;COI;;;;  
HM400989;Lepidoptera;COI;;;;  
HM400989;Lepidoptera;COI;;;;  
HM401009;Lepidoptera;COI;;;;  
HM401010;Lepidoptera;COI;;;;  
HM401011;Lepidoptera;COI;;;;  
HM401012;Lepidoptera;COI;;;;  
HM401018;Lepidoptera;COI;;;;  
HM401019;Lepidoptera;COI;;;;  
HM425866;Lepidoptera;COI;;;;  
HM425928;Lepidoptera;COI;;;;  
HM425954;Lepidoptera;COI;;;;  
HM870991;Lepidoptera;COI;;;;  
HM870992;Lepidoptera;COI;;;;  
HM871926;Lepidoptera;COI;;;;  
HM871926;Lepidoptera;COI;;;;  
HM871927;Lepidoptera;COI;;;;  
HM871927;Lepidoptera;COI;;;;  
HM871931;Lepidoptera;COI;;;;  
HM871931;Lepidoptera;COI;;;;  
HM871939;Lepidoptera;COI;;;;  
HM873306;Lepidoptera;COI;;;;  
HM873544;Lepidoptera;COI;;;;  
HM873572;Lepidoptera;COI;;;;  
HM874159;Lepidoptera;COI;;;;  
HM874826;Lepidoptera;COI;;;;  
HM874827;Lepidoptera;COI;;;;  
HM901257;Lepidoptera;COI;;;;  
HM901290;Lepidoptera;COI;;;;  
HM901344;Lepidoptera;COI;;;;  
HM901344;Lepidoptera;COI;;;;  
HM901378;Lepidoptera;COI;;;;  
HM901378;Lepidoptera;COI;;;;  
HM901380;Lepidoptera;COI;;;;  
HM901380;Lepidoptera;COI;;;;  
HM901382;Lepidoptera;COI;;;;  
HM901382;Lepidoptera;COI;;;;  
HM901419;Lepidoptera;COI;;;;  
HM901419;Lepidoptera;COI;;;;  
HM901420;Lepidoptera;COI;;;;  
HM901420;Lepidoptera;COI;;;;  
HM901546;Lepidoptera;COI;;;;  
HM901617;Lepidoptera;COI;;;;  
HM901721;Lepidoptera;COI;;;;  
HM901728;Lepidoptera;COI;;;;  
HM901777;Lepidoptera;COI;;;;  
HM901791;Lepidoptera;COI;;;;  
HM901837;Lepidoptera;COI;;;;  
HM901838;Lepidoptera;COI;;;;  
HM904299;Lepidoptera;COI;;;;  
HM904301;Lepidoptera;COI;;;;  
HM904306;Lepidoptera;COI;;;;  
HM904312;Lepidoptera;COI;;;;  
HM904315;Lepidoptera;COI;;;;  
HM910016;Lepidoptera;COI;;;;  
HM910016;Lepidoptera;COI;;;;  
HM910017;Lepidoptera;COI;;;;  
HM910017;Lepidoptera;COI;;;;



HM910019;Lepidoptera;COI;;;;  
HM910019;Lepidoptera;COI;;;;  
HM910574;Lepidoptera;COI;;;;  
HM913944;Lepidoptera;COI;;;;  
HM913962;Lepidoptera;COI;;;;  
HM913964;Lepidoptera;COI;;;;  
HM913965;Lepidoptera;COI;;;;  
HQ004015;Lepidoptera;COI;;;;  
HQ004017;Lepidoptera;COI;;;;  
HQ004021;Lepidoptera;COI;;;;  
HQ004190;Lepidoptera;COI;;;;  
HQ004210;Lepidoptera;COI;;;;  
HQ004211;Lepidoptera;COI;;;;  
HQ004212;Lepidoptera;COI;;;;  
HQ004213;Lepidoptera;COI;;;;  
HQ004214;Lepidoptera;COI;;;;  
HQ004215;Lepidoptera;COI;;;;  
HQ004216;Lepidoptera;COI;;;;  
HQ004217;Lepidoptera;COI;;;;  
HQ004218;Lepidoptera;COI;;;;  
HQ004274;Lepidoptera;COI;;;;  
HQ004275;Lepidoptera;COI;;;;  
HQ004276;Lepidoptera;COI;;;;  
HQ004277;Lepidoptera;COI;;;;  
HQ004278;Lepidoptera;COI;;;;  
HQ004279;Lepidoptera;COI;;;;  
HQ004280;Lepidoptera;COI;;;;  
HQ004281;Lepidoptera;COI;;;;  
HQ004310;Lepidoptera;COI;;;;  
HQ004311;Lepidoptera;COI;;;;  
HQ004312;Lepidoptera;COI;;;;  
HQ004314;Lepidoptera;COI;;;;  
HQ004315;Lepidoptera;COI;;;;  
HQ004316;Lepidoptera;COI;;;;  
HQ004317;Lepidoptera;COI;;;;  
HQ004318;Lepidoptera;COI;;;;  
HQ004362;Lepidoptera;COI;;;;  
HQ004363;Lepidoptera;COI;;;;  
HQ004364;Lepidoptera;COI;;;;  
HQ004365;Lepidoptera;COI;;;;  
HQ004366;Lepidoptera;COI;;;;  
HQ004367;Lepidoptera;COI;;;;  
HQ004368;Lepidoptera;COI;;;;  
HQ004398;Lepidoptera;COI;;;;  
HQ004399;Lepidoptera;COI;;;;  
HQ004400;Lepidoptera;COI;;;;  
HQ004484;Lepidoptera;COI;;;;  
HQ004485;Lepidoptera;COI;;;;  
HQ004486;Lepidoptera;COI;;;;  
HQ004730;Lepidoptera;COI;;;;  
HQ004732;Lepidoptera;COI;;;;  
HQ004733;Lepidoptera;COI;;;;  
HQ004735;Lepidoptera;COI;;;;  
HQ004736;Lepidoptera;COI;;;;  
HQ004737;Lepidoptera;COI;;;;  
HQ004738;Lepidoptera;COI;;;;  
HQ004739;Lepidoptera;COI;;;;  
HQ004839;Lepidoptera;COI;;;;  
HQ004919;Lepidoptera;COI;;;;  
HQ004920;Lepidoptera;COI;;;;  
HQ004921;Lepidoptera;COI;;;;  
HQ004922;Lepidoptera;COI;;;;  
HQ004923;Lepidoptera;COI;;;;  
HQ004924;Lepidoptera;COI;;;;  
HQ004925;Lepidoptera;COI;;;;  
HQ004926;Lepidoptera;COI;;;;  
HQ004927;Lepidoptera;COI;;;;  
HQ004928;Lepidoptera;COI;;;;  
HQ004939;Lepidoptera;COI;;;;  
HQ004951;Lepidoptera;COI;;;;  
HQ004977;Lepidoptera;COI;;;;  
HQ004978;Lepidoptera;COI;;;;  
HQ004979;Lepidoptera;COI;;;;  
HQ004980;Lepidoptera;COI;;;;  
HQ004981;Lepidoptera;COI;;;;  
HQ004982;Lepidoptera;COI;;;;  
HQ004983;Lepidoptera;COI;;;;  
HQ004984;Lepidoptera;COI;;;;

HQ004985;Lepidoptera;COI;;;;  
HQ004986;Lepidoptera;COI;;;;  
HQ004987;Lepidoptera;COI;;;;  
HQ004988;Lepidoptera;COI;;;;  
HQ004989;Lepidoptera;COI;;;;  
HQ004990;Lepidoptera;COI;;;;  
HQ004991;Lepidoptera;COI;;;;  
HQ004992;Lepidoptera;COI;;;;  
HQ004992;Lepidoptera;COI;;;;  
HQ004993;Lepidoptera;COI;;;;  
HQ004993;Lepidoptera;COI;;;;  
HQ005002;Lepidoptera;COI;;;;  
HQ005003;Lepidoptera;COI;;;;  
HQ005004;Lepidoptera;COI;;;;  
HQ005005;Lepidoptera;COI;;;;  
HQ005006;Lepidoptera;COI;;;;  
HQ005007;Lepidoptera;COI;;;;  
HQ005008;Lepidoptera;COI;;;;  
HQ005010;Lepidoptera;COI;;;;  
HQ005011;Lepidoptera;COI;;;;  
HQ005012;Lepidoptera;COI;;;;  
HQ005013;Lepidoptera;COI;;;;  
HQ005014;Lepidoptera;COI;;;;  
HQ005015;Lepidoptera;COI;;;;  
HQ005017;Lepidoptera;COI;;;;  
HQ005018;Lepidoptera;COI;;;;  
HQ005019;Lepidoptera;COI;;;;  
HQ005030;Lepidoptera;COI;;;;  
HQ005082;Lepidoptera;COI;;;;  
HQ005083;Lepidoptera;COI;;;;  
HQ005084;Lepidoptera;COI;;;;  
HQ005085;Lepidoptera;COI;;;;  
HQ005086;Lepidoptera;COI;;;;  
HQ005087;Lepidoptera;COI;;;;  
HQ005088;Lepidoptera;COI;;;;  
HQ005089;Lepidoptera;COI;;;;  
HQ005090;Lepidoptera;COI;;;;  
HQ176010;Lepidoptera;COI;;;;  
HQ176011;Lepidoptera;COI;;;;  
HQ176012;Lepidoptera;COI;;;;  
HQ176013;Lepidoptera;COI;;;;  
HQ176014;Lepidoptera;COI;;;;  
HQ176015;Lepidoptera;COI;;;;  
HQ176016;Lepidoptera;COI;;;;  
HQ176017;Lepidoptera;COI;;;;  
HQ176018;Lepidoptera;COI;;;;  
HQ176019;Lepidoptera;COI;;;;  
HQ176020;Lepidoptera;COI;;;;  
HQ176021;Lepidoptera;COI;;;;  
HQ224581;Lepidoptera;COI;;;;  
HQ224582;Lepidoptera;COI;;;;  
HQ224583;Lepidoptera;COI;;;;  
HQ224584;Lepidoptera;COI;;;;  
HQ563537;Lepidoptera;COI;;;;  
HQ563539;Lepidoptera;COI;;;;  
HQ563539;Lepidoptera;COI;;;;  
HQ563540;Lepidoptera;COI;;;;  
HQ563542;Lepidoptera;COI;;;;  
HQ563543;Lepidoptera;COI;;;;  
HQ563543;Lepidoptera;COI;;;;  
HQ563553;Lepidoptera;COI;;;;  
HQ563554;Lepidoptera;COI;;;;  
HQ563557;Lepidoptera;COI;;;;  
HQ563557;Lepidoptera;COI;;;;  
HQ563558;Lepidoptera;COI;;;;  
HQ563558;Lepidoptera;COI;;;;  
HQ563561;Lepidoptera;COI;;;;  
HQ563583;Lepidoptera;COI;;;;  
HQ563583;Lepidoptera;COI;;;;  
HQ563585;Lepidoptera;COI;;;;  
HQ563585;Lepidoptera;COI;;;;  
HQ565464;Lepidoptera;COI;;;;  
HQ565468;Lepidoptera;COI;;;;  
HQ565492;Lepidoptera;COI;;;;  
HQ565493;Lepidoptera;COI;;;;  
HQ565495;Lepidoptera;COI;;;;  
HQ570288;Lepidoptera;COI;;;;  
HQ918141;Lepidoptera;COI;;;;

HQ918142;Lepidoptera;COI;;;;  
HQ918143;Lepidoptera;COI;;;;  
HQ918144;Lepidoptera;COI;;;;  
HQ918145;Lepidoptera;COI;;;;  
HQ918146;Lepidoptera;COI;;;;  
HQ918147;Lepidoptera;COI;;;;  
HQ918148;Lepidoptera;COI;;;;  
HQ918149;Lepidoptera;COI;;;;  
HQ918153;Lepidoptera;COI;;;;  
HQ918153;Lepidoptera;COI;;;;  
HQ918154;Lepidoptera;COI;;;;  
HQ918154;Lepidoptera;COI;;;;  
HQ918155;Lepidoptera;COI;;;;  
HQ918155;Lepidoptera;COI;;;;  
HQ918156;Lepidoptera;COI;;;;  
HQ918156;Lepidoptera;COI;;;;  
HQ918157;Lepidoptera;COI;;;;  
HQ918157;Lepidoptera;COI;;;;  
HQ918159;Lepidoptera;COI;;;;  
HQ918160;Lepidoptera;COI;;;;  
HQ918163;Lepidoptera;COI;;;;  
HQ918164;Lepidoptera;COI;;;;  
HQ918167;Lepidoptera;COI;;;;  
HQ957211;Lepidoptera;COI;;;;  
HQ968391;Lepidoptera;COI;;;;  
HQ968391;Lepidoptera;COI;;;;  
HQ968456;Lepidoptera;COI;;;;  
HQ968457;Lepidoptera;COI;;;;  
HQ968485;Lepidoptera;COI;;;;  
HQ968488;Lepidoptera;COI;;;;  
HQ968514;Lepidoptera;COI;;;;  
HQ968514;Lepidoptera;COI;;;;  
HQ968515;Lepidoptera;COI;;;;  
HQ968515;Lepidoptera;COI;;;;  
HQ968519;Lepidoptera;COI;;;;  
HQ968530;Lepidoptera;COI;;;;  
HQ968531;Lepidoptera;COI;;;;  
JF415712;Lepidoptera;COI;;;;  
JF415724;Lepidoptera;COI;;;;  
JF415724;Lepidoptera;COI;;;;  
JF415725;Lepidoptera;COI;;;;  
JF810413;Lepidoptera;COI;;;;  
JF850429;Lepidoptera;COI;;;;  
JF850432;Lepidoptera;COI;;;;  
JF853624;Lepidoptera;COI;;;;  
JF853632;Lepidoptera;COI;;;;  
JF853653;Lepidoptera;COI;;;;  
JF853654;Lepidoptera;COI;;;;  
JF853665;Lepidoptera;COI;;;;  
JF853832;Lepidoptera;COI;;;;  
JF854493;Lepidoptera;COI;;;;  
JN084688;Lepidoptera;COI;;;;  
JN265786;Lepidoptera;COI;;;;  
JN276895;Lepidoptera;COI;;;;  
JN276895;Lepidoptera;COI;;;;  
JN276897;Lepidoptera;COI;;;;  
JN276897;Lepidoptera;COI;;;;  
JN276902;Lepidoptera;COI;;;;  
JN276904;Lepidoptera;COI;;;;  
JN276904;Lepidoptera;COI;;;;  
JN276908;Lepidoptera;COI;;;;  
JN276910;Lepidoptera;COI;;;;  
JN276911;Lepidoptera;COI;;;;  
JN276911;Lepidoptera;COI;;;;  
JN276914;Lepidoptera;COI;;;;  
JN277563;Lepidoptera;COI;;;;  
JN277563;Lepidoptera;COI;;;;  
JN277571;Lepidoptera;COI;;;;  
JN827879;Lepidoptera;COI;;;;  
JX013970;Lepidoptera;COI;;;;  
JX013971;Lepidoptera;COI;;;;  
JX013972;Lepidoptera;COI;;;;  
JX013973;Lepidoptera;COI;;;;  
JX013974;Lepidoptera;COI;;;;  
JX093461;Lepidoptera;COI;;;;  
JX155755;Lepidoptera;COI;;;;  
JX311069;Lepidoptera;COI;;;;  
JX311075;Lepidoptera;COI;;;;

JX311078;Lepidoptera;COI;;;;  
JX311083;Lepidoptera;COI;;;;  
JX311084;Lepidoptera;COI;;;;  
JX311086;Lepidoptera;COI;;;;  
JX311087;Lepidoptera;COI;;;;  
JX311093;Lepidoptera;COI;;;;  
JX311096;Lepidoptera;COI;;;;  
JX311100;Lepidoptera;COI;;;;  
JX311101;Lepidoptera;COI;;;;  
JX311102;Lepidoptera;COI;;;;  
JX311103;Lepidoptera;COI;;;;  
JX311104;Lepidoptera;COI;;;;  
JX311105;Lepidoptera;COI;;;;  
JX311106;Lepidoptera;COI;;;;  
JX311107;Lepidoptera;COI;;;;  
JX311108;Lepidoptera;COI;;;;  
JX311109;Lepidoptera;COI;;;;  
JX311110;Lepidoptera;COI;;;;  
JX311111;Lepidoptera;COI;;;;  
JX311113;Lepidoptera;COI;;;;  
JX311114;Lepidoptera;COI;;;;  
JX311116;Lepidoptera;COI;;;;  
JX311117;Lepidoptera;COI;;;;  
JX311118;Lepidoptera;COI;;;;  
JX311119;Lepidoptera;COI;;;;  
JX311120;Lepidoptera;COI;;;;  
JX311121;Lepidoptera;COI;;;;  
JX311122;Lepidoptera;COI;;;;  
JX311126;Lepidoptera;COI;;;;  
JX311128;Lepidoptera;COI;;;;  
JX311129;Lepidoptera;COI;;;;  
JX311130;Lepidoptera;COI;;;;  
JX311134;Lepidoptera;COI;;;;  
JX311135;Lepidoptera;COI;;;;  
JX311136;Lepidoptera;COI;;;;  
JX311137;Lepidoptera;COI;;;;  
JX311138;Lepidoptera;COI;;;;  
JX311139;Lepidoptera;COI;;;;  
JX311157;Lepidoptera;COI;;;;  
JX311162;Lepidoptera;COI;;;;  
JX311163;Lepidoptera;COI;;;;  
JX311164;Lepidoptera;COI;;;;  
JX311165;Lepidoptera;COI;;;;  
JX311167;Lepidoptera;COI;;;;  
JX311168;Lepidoptera;COI;;;;  
JX311169;Lepidoptera;COI;;;;  
JX311182;Lepidoptera;COI;;;;  
JX311183;Lepidoptera;COI;;;;  
JX311189;Lepidoptera;COI;;;;  
JX311190;Lepidoptera;COI;;;;  
JX311193;Lepidoptera;COI;;;;  
JX311194;Lepidoptera;COI;;;;  
JX311195;Lepidoptera;COI;;;;  
JX311196;Lepidoptera;COI;;;;  
JX311197;Lepidoptera;COI;;;;  
JX311198;Lepidoptera;COI;;;;  
JX311199;Lepidoptera;COI;;;;  
JX311200;Lepidoptera;COI;;;;  
JX311201;Lepidoptera;COI;;;;  
JX311202;Lepidoptera;COI;;;;  
JX311207;Lepidoptera;COI;;;;  
JX311208;Lepidoptera;COI;;;;  
JX311209;Lepidoptera;COI;;;;  
JX311210;Lepidoptera;COI;;;;  
JX311211;Lepidoptera;COI;;;;  
JX311213;Lepidoptera;COI;;;;  
JX311214;Lepidoptera;COI;;;;  
JX311215;Lepidoptera;COI;;;;  
JX311216;Lepidoptera;COI;;;;  
JX311217;Lepidoptera;COI;;;;  
JX311223;Lepidoptera;COI;;;;  
JX311225;Lepidoptera;COI;;;;  
JX311226;Lepidoptera;COI;;;;  
JX311227;Lepidoptera;COI;;;;  
JX311229;Lepidoptera;COI;;;;  
JX311230;Lepidoptera;COI;;;;  
JX311231;Lepidoptera;COI;;;;  
JX311232;Lepidoptera;COI;;;;

JX311250;Lepidoptera;COI;;;;  
JX311254;Lepidoptera;COI;;;;  
JX311255;Lepidoptera;COI;;;;  
JX311260;Lepidoptera;COI;;;;  
JX311261;Lepidoptera;COI;;;;  
JX311262;Lepidoptera;COI;;;;  
JX311263;Lepidoptera;COI;;;;  
JX311264;Lepidoptera;COI;;;;  
JX311265;Lepidoptera;COI;;;;  
JX311266;Lepidoptera;COI;;;;  
JX311267;Lepidoptera;COI;;;;  
JX311268;Lepidoptera;COI;;;;  
JX311269;Lepidoptera;COI;;;;  
JX311270;Lepidoptera;COI;;;;  
JX311271;Lepidoptera;COI;;;;  
JX311272;Lepidoptera;COI;;;;  
JX311273;Lepidoptera;COI;;;;  
JX311275;Lepidoptera;COI;;;;  
KC462786;Lepidoptera;COI;;;;  
KC462787;Lepidoptera;COI;;;;  
KC462797;Lepidoptera;COI;;;;  
KC462798;Lepidoptera;COI;;;;  
KC462799;Lepidoptera;COI;;;;  
KC462803;Lepidoptera;COI;;;;  
KC462812;Lepidoptera;COI;;;;  
KC462813;Lepidoptera;COI;;;;  
KC462814;Lepidoptera;COI;;;;  
KC462822;Lepidoptera;COI;;;;  
KC462827;Lepidoptera;COI;;;;  
KC462832;Lepidoptera;COI;;;;  
KC462833;Lepidoptera;COI;;;;  
KC462840;Lepidoptera;COI;;;;  
KC462841;Lepidoptera;COI;;;;  
KC462847;Lepidoptera;COI;;;;  
KC462848;Lepidoptera;COI;;;;  
KC462854;Lepidoptera;COI;;;;  
KC462855;Lepidoptera;COI;;;;  
KC462856;Lepidoptera;COI;;;;  
KC462857;Lepidoptera;COI;;;;  
KC462858;Lepidoptera;COI;;;;  
KC462859;Lepidoptera;COI;;;;  
KC462860;Lepidoptera;COI;;;;  
KC462861;Lepidoptera;COI;;;;  
KC462862;Lepidoptera;COI;;;;  
KC462863;Lepidoptera;COI;;;;  
KC462864;Lepidoptera;COI;;;;  
KC462867;Lepidoptera;COI;;;;  
KC462868;Lepidoptera;COI;;;;  
KC462872;Lepidoptera;COI;;;;  
KC462873;Lepidoptera;COI;;;;  
KC692330;Lepidoptera;COI;;;;  
KC967227;Lepidoptera;COI;;;;  
KC967227;Lepidoptera;COI;;;;  
KC967228;Lepidoptera;COI;;;;  
KC967228;Lepidoptera;COI;;;;  
KC967229;Lepidoptera;COI;;;;  
KC967229;Lepidoptera;COI;;;;  
KC967230;Lepidoptera;COI;;;;  
KC967230;Lepidoptera;COI;;;;  
KC967231;Lepidoptera;COI;;;;  
KC967231;Lepidoptera;COI;;;;  
KC967232;Lepidoptera;COI;;;;  
KC967232;Lepidoptera;COI;;;;  
KC967233;Lepidoptera;COI;;;;  
KC967233;Lepidoptera;COI;;;;  
KC967234;Lepidoptera;COI;;;;  
KC967234;Lepidoptera;COI;;;;  
KC967235;Lepidoptera;COI;;;;  
KC967235;Lepidoptera;COI;;;;  
KC967236;Lepidoptera;COI;;;;  
KC967236;Lepidoptera;COI;;;;  
KC967237;Lepidoptera;COI;;;;  
KC967237;Lepidoptera;COI;;;;  
KC967238;Lepidoptera;COI;;;;  
KC967238;Lepidoptera;COI;;;;  
KC967239;Lepidoptera;COI;;;;  
KC967239;Lepidoptera;COI;;;;  
KC967240;Lepidoptera;COI;;;;

KC967240;Lepidoptera;COI;;;;  
KC967241;Lepidoptera;COI;;;;  
KC967241;Lepidoptera;COI;;;;  
KC967242;Lepidoptera;COI;;;;  
KC967242;Lepidoptera;COI;;;;  
KC967243;Lepidoptera;COI;;;;  
KC967243;Lepidoptera;COI;;;;  
KC967244;Lepidoptera;COI;;;;  
KC967244;Lepidoptera;COI;;;;  
KC967245;Lepidoptera;COI;;;;  
KC967245;Lepidoptera;COI;;;;  
KC967246;Lepidoptera;COI;;;;  
KC967246;Lepidoptera;COI;;;;  
KC967247;Lepidoptera;COI;;;;  
KC967247;Lepidoptera;COI;;;;  
KC967248;Lepidoptera;COI;;;;  
KC967248;Lepidoptera;COI;;;;  
KC967249;Lepidoptera;COI;;;;  
KC967249;Lepidoptera;COI;;;;  
KC967250;Lepidoptera;COI;;;;  
KC967250;Lepidoptera;COI;;;;  
KC967251;Lepidoptera;COI;;;;  
KC967251;Lepidoptera;COI;;;;  
KC967252;Lepidoptera;COI;;;;  
KC967252;Lepidoptera;COI;;;;  
KC967253;Lepidoptera;COI;;;;  
KC967253;Lepidoptera;COI;;;;  
KF444470;Lepidoptera;COI;;;;  
KF444471;Lepidoptera;COI;;;;  
KF444472;Lepidoptera;COI;;;;  
KF444473;Lepidoptera;COI;;;;  
KF647233;Lepidoptera;COI;;;;  
KF834369;Lepidoptera;COI;;;;  
KF834369;Lepidoptera;COI;;;;  
KF860859;Lepidoptera;COI;;;;  
KJ648990;Lepidoptera;COI;;;;  
KM020808;Lepidoptera;COI;;;;  
KM020810;Lepidoptera;COI;;;;  
KM020811;Lepidoptera;COI;;;;  
KM020816;Lepidoptera;COI;;;;  
KM020819;Lepidoptera;COI;;;;  
KM020821;Lepidoptera;COI;;;;  
KM020829;Lepidoptera;COI;;;;  
KM020832;Lepidoptera;COI;;;;  
KM020834;Lepidoptera;COI;;;;  
KM020839;Lepidoptera;COI;;;;  
KM020840;Lepidoptera;COI;;;;  
KM020841;Lepidoptera;COI;;;;  
KM020845;Lepidoptera;COI;;;;  
KM020848;Lepidoptera;COI;;;;  
KM020853;Lepidoptera;COI;;;;  
KM020855;Lepidoptera;COI;;;;  
KM020858;Lepidoptera;COI;;;;  
KM020860;Lepidoptera;COI;;;;  
KM020862;Lepidoptera;COI;;;;  
KM020864;Lepidoptera;COI;;;;  
KM020866;Lepidoptera;COI;;;;  
KM020871;Lepidoptera;COI;;;;  
KM020878;Lepidoptera;COI;;;;  
KM020881;Lepidoptera;COI;;;;  
KM033853;Lepidoptera;COI;;;;  
KM033854;Lepidoptera;COI;;;;  
KM033855;Lepidoptera;COI;;;;  
KM033859;Lepidoptera;COI;;;;  
KM033860;Lepidoptera;COI;;;;  
KM033861;Lepidoptera;COI;;;;  
KM033865;Lepidoptera;COI;;;;  
KM033866;Lepidoptera;COI;;;;  
KM033867;Lepidoptera;COI;;;;  
KM033868;Lepidoptera;COI;;;;  
KM033869;Lepidoptera;COI;;;;  
KM033870;Lepidoptera;COI;;;;  
KM033872;Lepidoptera;COI;;;;  
KM033873;Lepidoptera;COI;;;;  
KM033874;Lepidoptera;COI;;;;  
KM033876;Lepidoptera;COI;;;;  
KM033877;Lepidoptera;COI;;;;  
KM033878;Lepidoptera;COI;;;;

KM033879;Lepidoptera;COI;;;;  
KM033880;Lepidoptera;COI;;;;  
KM033881;Lepidoptera;COI;;;;  
KM033883;Lepidoptera;COI;;;;  
KM033884;Lepidoptera;COI;;;;  
KM033887;Lepidoptera;COI;;;;  
KM033888;Lepidoptera;COI;;;;  
KM033889;Lepidoptera;COI;;;;  
KM033894;Lepidoptera;COI;;;;  
KM033904;Lepidoptera;COI;;;;  
KM033907;Lepidoptera;COI;;;;  
KM033908;Lepidoptera;COI;;;;  
KM033915;Lepidoptera;COI;;;;  
KM033916;Lepidoptera;COI;;;;  
KM033917;Lepidoptera;COI;;;;  
KM033918;Lepidoptera;COI;;;;  
KM033924;Lepidoptera;COI;;;;  
KM033926;Lepidoptera;COI;;;;  
KM033927;Lepidoptera;COI;;;;  
KM033940;Lepidoptera;COI;;;;  
KM196494;Lepidoptera;COI;;;;  
KM196496;Lepidoptera;COI;;;;  
KM287737;Lepidoptera;COI;;;;  
KM287739;Lepidoptera;COI;;;;  
KM287783;Lepidoptera;COI;;;;  
KM287796;Lepidoptera;COI;;;;  
KM287798;Lepidoptera;COI;;;;  
KM459414;Lepidoptera;COI;;;;  
KM517249;Lepidoptera;COI;;;;  
KM517250;Lepidoptera;COI;;;;  
KM517251;Lepidoptera;COI;;;;  
KM517252;Lepidoptera;COI;;;;  
KM517253;Lepidoptera;COI;;;;  
KM517254;Lepidoptera;COI;;;;  
KM517255;Lepidoptera;COI;;;;  
KM517256;Lepidoptera;COI;;;;  
KM517257;Lepidoptera;COI;;;;  
KM517258;Lepidoptera;COI;;;;  
KM517259;Lepidoptera;COI;;;;  
KM517260;Lepidoptera;COI;;;;  
KM517261;Lepidoptera;COI;;;;  
KM517262;Lepidoptera;COI;;;;  
KM517263;Lepidoptera;COI;;;;  
KM517264;Lepidoptera;COI;;;;  
KM517265;Lepidoptera;COI;;;;  
KM517266;Lepidoptera;COI;;;;  
KM517267;Lepidoptera;COI;;;;  
KM517268;Lepidoptera;COI;;;;  
KM517269;Lepidoptera;COI;;;;  
KM517270;Lepidoptera;COI;;;;  
KM517271;Lepidoptera;COI;;;;  
KM517272;Lepidoptera;COI;;;;  
KM517273;Lepidoptera;COI;;;;  
KM517274;Lepidoptera;COI;;;;  
KM517275;Lepidoptera;COI;;;;  
KM517276;Lepidoptera;COI;;;;  
KM517277;Lepidoptera;COI;;;;  
KM517278;Lepidoptera;COI;;;;  
KM517279;Lepidoptera;COI;;;;  
KM517280;Lepidoptera;COI;;;;  
KM517281;Lepidoptera;COI;;;;  
KM517282;Lepidoptera;COI;;;;  
KM517283;Lepidoptera;COI;;;;  
KM517284;Lepidoptera;COI;;;;  
KM517285;Lepidoptera;COI;;;;  
KM517286;Lepidoptera;COI;;;;  
KM517288;Lepidoptera;COI;;;;  
KM517290;Lepidoptera;COI;;;;  
KM517291;Lepidoptera;COI;;;;  
KM517292;Lepidoptera;COI;;;;  
KM517293;Lepidoptera;COI;;;;  
KM517294;Lepidoptera;COI;;;;  
KM517295;Lepidoptera;COI;;;;  
KM517296;Lepidoptera;COI;;;;  
KM517297;Lepidoptera;COI;;;;  
KM572201;Lepidoptera;COI;;;;  
KM572268;Lepidoptera;COI;;;;  
KM572268;Lepidoptera;COI;;;;

KM572382;Lepidoptera;COI;;;;  
KM572538;Lepidoptera;COI;;;;  
KM572599;Lepidoptera;COI;;;;  
KM572599;Lepidoptera;COI;;;;  
KM573026;Lepidoptera;COI;;;;  
KM573117;Lepidoptera;COI;;;;  
KM972601;Lepidoptera;COI;;;;  
KM972602;Lepidoptera;COI;;;;  
KM972602;Lepidoptera;COI;;;;  
KM972605;Lepidoptera;COI;;;;  
KM972605;Lepidoptera;COI;;;;  
KM972606;Lepidoptera;COI;;;;  
KM972609;Lepidoptera;COI;;;;  
KM972609;Lepidoptera;COI;;;;  
KM972611;Lepidoptera;COI;;;;  
KM972611;Lepidoptera;COI;;;;  
KM972612;Lepidoptera;COI;;;;  
KM972612;Lepidoptera;COI;;;;  
KM972614;Lepidoptera;COI;;;;  
KM972615;Lepidoptera;COI;;;;  
KM972618;Lepidoptera;COI;;;;  
KM972619;Lepidoptera;COI;;;;  
KM972623;Lepidoptera;COI;;;;  
KM972624;Lepidoptera;COI;;;;  
KM972626;Lepidoptera;COI;;;;  
KP032241;Lepidoptera;COI;;;;  
KP032242;Lepidoptera;COI;;;;  
KP032243;Lepidoptera;COI;;;;  
KP032244;Lepidoptera;COI;;;;  
KP032245;Lepidoptera;COI;;;;  
KP032246;Lepidoptera;COI;;;;  
KP032248;Lepidoptera;COI;;;;  
KP032252;Lepidoptera;COI;;;;  
KP032261;Lepidoptera;COI;;;;  
KP032263;Lepidoptera;COI;;;;  
KP032264;Lepidoptera;COI;;;;  
KP032282;Lepidoptera;COI;;;;  
KP032287;Lepidoptera;COI;;;;  
KP032290;Lepidoptera;COI;;;;  
KP032293;Lepidoptera;COI;;;;  
KP032294;Lepidoptera;COI;;;;  
KP032296;Lepidoptera;COI;;;;  
KP032298;Lepidoptera;COI;;;;  
KP032299;Lepidoptera;COI;;;;  
KP032300;Lepidoptera;COI;;;;  
KP032320;Lepidoptera;COI;;;;  
KP032331;Lepidoptera;COI;;;;  
KP032332;Lepidoptera;COI;;;;  
KP253261;Lepidoptera;COI;;;;  
KP253274;Lepidoptera;COI;;;;  
KP253281;Lepidoptera;COI;;;;  
KP253307;Lepidoptera;COI;;;;  
KP253487;Lepidoptera;COI;;;;  
KP253731;Lepidoptera;COI;;;;  
KP870344;Lepidoptera;COI;;;;  
KP870344;Lepidoptera;COI;;;;  
KP870371;Lepidoptera;COI;;;;  
KP870385;Lepidoptera;COI;;;;  
KP870389;Lepidoptera;COI;;;;  
KP870393;Lepidoptera;COI;;;;  
KP870401;Lepidoptera;COI;;;;  
KP870409;Lepidoptera;COI;;;;  
KP870462;Lepidoptera;COI;;;;  
KP870473;Lepidoptera;COI;;;;  
KP870480;Lepidoptera;COI;;;;  
KP870482;Lepidoptera;COI;;;;  
KP870537;Lepidoptera;COI;;;;  
KP870543;Lepidoptera;COI;;;;  
KP870602;Lepidoptera;COI;;;;  
KP870697;Lepidoptera;COI;;;;  
KP870725;Lepidoptera;COI;;;;  
KP870740;Lepidoptera;COI;;;;  
KP870772;Lepidoptera;COI;;;;  
KP870817;Lepidoptera;COI;;;;  
KP870869;Lepidoptera;COI;;;;  
KP870917;Lepidoptera;COI;;;;  
KP870968;Lepidoptera;COI;;;;  
KP871017;Lepidoptera;COI;;;;



KP871037;Lepidoptera;COI;;;;  
KP871069;Lepidoptera;COI;;;;  
KP871092;Lepidoptera;COI;;;;  
KP871092;Lepidoptera;COI;;;;  
KP871097;Lepidoptera;COI;;;;  
KR007004;Lepidoptera;COI;;;;  
KR007005;Lepidoptera;COI;;;;  
KR007006;Lepidoptera;COI;;;;  
KR007007;Lepidoptera;COI;;;;  
KR007008;Lepidoptera;COI;;;;  
KR007009;Lepidoptera;COI;;;;  
KR007010;Lepidoptera;COI;;;;  
KR007011;Lepidoptera;COI;;;;  
KR007012;Lepidoptera;COI;;;;  
KR007028;Lepidoptera;COI;;;;  
KR007029;Lepidoptera;COI;;;;  
KR007030;Lepidoptera;COI;;;;  
KR007031;Lepidoptera;COI;;;;  
KR007032;Lepidoptera;COI;;;;  
KR007033;Lepidoptera;COI;;;;  
KR007034;Lepidoptera;COI;;;;  
KR007035;Lepidoptera;COI;;;;  
KR007036;Lepidoptera;COI;;;;  
KR007037;Lepidoptera;COI;;;;  
KR007042;Lepidoptera;COI;;;;  
KR007043;Lepidoptera;COI;;;;  
KR007044;Lepidoptera;COI;;;;  
KR007045;Lepidoptera;COI;;;;  
KR007046;Lepidoptera;COI;;;;  
KR007047;Lepidoptera;COI;;;;  
KR007048;Lepidoptera;COI;;;;  
KR007049;Lepidoptera;COI;;;;  
KR007050;Lepidoptera;COI;;;;  
KR007051;Lepidoptera;COI;;;;  
KR007052;Lepidoptera;COI;;;;  
KR007053;Lepidoptera;COI;;;;  
KR007054;Lepidoptera;COI;;;;  
KR007055;Lepidoptera;COI;;;;  
KR007061;Lepidoptera;COI;;;;  
KR007062;Lepidoptera;COI;;;;  
KR007063;Lepidoptera;COI;;;;  
KR007064;Lepidoptera;COI;;;;  
KR007065;Lepidoptera;COI;;;;  
KR007069;Lepidoptera;COI;;;;  
KR007071;Lepidoptera;COI;;;;  
KR007081;Lepidoptera;COI;;;;  
KR007082;Lepidoptera;COI;;;;  
KR007083;Lepidoptera;COI;;;;  
KR007084;Lepidoptera;COI;;;;  
KR007085;Lepidoptera;COI;;;;  
KR007086;Lepidoptera;COI;;;;  
KR007087;Lepidoptera;COI;;;;  
KR007088;Lepidoptera;COI;;;;  
KR007089;Lepidoptera;COI;;;;  
KR007090;Lepidoptera;COI;;;;  
KR007091;Lepidoptera;COI;;;;  
KR007092;Lepidoptera;COI;;;;  
KR007093;Lepidoptera;COI;;;;  
KR007094;Lepidoptera;COI;;;;  
KR007095;Lepidoptera;COI;;;;  
KR007096;Lepidoptera;COI;;;;  
KR007097;Lepidoptera;COI;;;;  
KR007098;Lepidoptera;COI;;;;  
KR007099;Lepidoptera;COI;;;;  
KR007100;Lepidoptera;COI;;;;  
KR007101;Lepidoptera;COI;;;;  
KR007102;Lepidoptera;COI;;;;  
KR007103;Lepidoptera;COI;;;;  
KR007104;Lepidoptera;COI;;;;  
KR007105;Lepidoptera;COI;;;;  
KR007106;Lepidoptera;COI;;;;  
KR007107;Lepidoptera;COI;;;;  
KR007108;Lepidoptera;COI;;;;  
KR007109;Lepidoptera;COI;;;;  
KR007110;Lepidoptera;COI;;;;  
KR007111;Lepidoptera;COI;;;;  
KR007112;Lepidoptera;COI;;;;  
KR007113;Lepidoptera;COI;;;;

KR007114;Lepidoptera;COI;;;;  
KR007115;Lepidoptera;COI;;;;  
KR007116;Lepidoptera;COI;;;;  
KR007117;Lepidoptera;COI;;;;  
KR007118;Lepidoptera;COI;;;;  
KR007119;Lepidoptera;COI;;;;  
KR007120;Lepidoptera;COI;;;;  
KR007121;Lepidoptera;COI;;;;  
KR007122;Lepidoptera;COI;;;;  
KR007123;Lepidoptera;COI;;;;  
KR007124;Lepidoptera;COI;;;;  
KR007125;Lepidoptera;COI;;;;  
KR007126;Lepidoptera;COI;;;;  
KR007127;Lepidoptera;COI;;;;  
KR007128;Lepidoptera;COI;;;;  
KR007129;Lepidoptera;COI;;;;  
KR007130;Lepidoptera;COI;;;;  
KR007131;Lepidoptera;COI;;;;  
KR007132;Lepidoptera;COI;;;;  
KR007133;Lepidoptera;COI;;;;  
KR007134;Lepidoptera;COI;;;;  
KR007135;Lepidoptera;COI;;;;  
KR007136;Lepidoptera;COI;;;;  
KR007137;Lepidoptera;COI;;;;  
KR007138;Lepidoptera;COI;;;;  
KR007139;Lepidoptera;COI;;;;  
KR007140;Lepidoptera;COI;;;;  
KR007141;Lepidoptera;COI;;;;  
KR007142;Lepidoptera;COI;;;;  
KR007143;Lepidoptera;COI;;;;  
KR007144;Lepidoptera;COI;;;;  
KR007145;Lepidoptera;COI;;;;  
KR007146;Lepidoptera;COI;;;;  
KR007147;Lepidoptera;COI;;;;  
KR007148;Lepidoptera;COI;;;;  
KR007149;Lepidoptera;COI;;;;  
KR007155;Lepidoptera;COI;;;;  
KT230684;Lepidoptera;COI;;;;  
KT782581;Lepidoptera;COI;;;;  
KT782663;Lepidoptera;COI;;;;  
KT792888;Lepidoptera;COI;;;;  
KT792889;Lepidoptera;COI;;;;  
KT792890;Lepidoptera;COI;;;;  
KT792891;Lepidoptera;COI;;;;  
KT792894;Lepidoptera;COI;;;;  
KT792906;Lepidoptera;COI;;;;  
KT907184;Lepidoptera;COI;;;;  
KT907185;Lepidoptera;COI;;;;  
KT989875;Lepidoptera;COI;;;;  
KU577157;Lepidoptera;COI;;;;  
KU577158;Lepidoptera;COI;;;;  
KU577159;Lepidoptera;COI;;;;  
KU577160;Lepidoptera;COI;;;;  
KU577161;Lepidoptera;COI;;;;  
KU577162;Lepidoptera;COI;;;;  
KU577163;Lepidoptera;COI;;;;  
KU577164;Lepidoptera;COI;;;;  
KU577165;Lepidoptera;COI;;;;  
KU577166;Lepidoptera;COI;;;;  
KU577167;Lepidoptera;COI;;;;  
KU577168;Lepidoptera;COI;;;;  
KU577169;Lepidoptera;COI;;;;  
KU577170;Lepidoptera;COI;;;;  
KU577171;Lepidoptera;COI;;;;  
KU577172;Lepidoptera;COI;;;;  
KU577173;Lepidoptera;COI;;;;  
KU577174;Lepidoptera;COI;;;;  
KU577175;Lepidoptera;COI;;;;  
KU577176;Lepidoptera;COI;;;;  
KU577177;Lepidoptera;COI;;;;  
KU577178;Lepidoptera;COI;;;;  
KU577179;Lepidoptera;COI;;;;  
KU577180;Lepidoptera;COI;;;;  
KU577181;Lepidoptera;COI;;;;  
KU577182;Lepidoptera;COI;;;;  
KU577183;Lepidoptera;COI;;;;  
KU577184;Lepidoptera;COI;;;;  
KU577185;Lepidoptera;COI;;;;

KU577186;Lepidoptera;COI;;;;  
KU577187;Lepidoptera;COI;;;;  
KU577188;Lepidoptera;COI;;;;  
KU577189;Lepidoptera;COI;;;;  
KU577190;Lepidoptera;COI;;;;  
KU577191;Lepidoptera;COI;;;;  
KU577192;Lepidoptera;COI;;;;  
KU577193;Lepidoptera;COI;;;;  
KU973553;Lepidoptera;COI;;;;  
KX011033;Lepidoptera;COI;;;;  
KX039986;Lepidoptera;COI;;;;  
KX039986;Lepidoptera;COI;;;;  
KX040121;Lepidoptera;COI;;;;  
KX040121;Lepidoptera;COI;;;;  
KX040210;Lepidoptera;COI;;;;  
KX040221;Lepidoptera;COI;;;;  
KX040221;Lepidoptera;COI;;;;  
KX040261;Lepidoptera;COI;;;;  
KX040261;Lepidoptera;COI;;;;  
KX040279;Lepidoptera;COI;;;;  
KX040299;Lepidoptera;COI;;;;  
KX040299;Lepidoptera;COI;;;;  
KX040356;Lepidoptera;COI;;;;  
KX040356;Lepidoptera;COI;;;;  
KX040519;Lepidoptera;COI;;;;  
KX040560;Lepidoptera;COI;;;;  
KX040560;Lepidoptera;COI;;;;  
KX040614;Lepidoptera;COI;;;;  
KX040614;Lepidoptera;COI;;;;  
KX040643;Lepidoptera;COI;;;;  
KX040643;Lepidoptera;COI;;;;  
KX040676;Lepidoptera;COI;;;;  
KX040676;Lepidoptera;COI;;;;  
KX040863;Lepidoptera;COI;;;;  
KX040863;Lepidoptera;COI;;;;  
KX040949;Lepidoptera;COI;;;;  
KX040949;Lepidoptera;COI;;;;  
KX041071;Lepidoptera;COI;;;;  
KX041493;Lepidoptera;COI;;;;  
KX041680;Lepidoptera;COI;;;;  
KX041760;Lepidoptera;COI;;;;  
KX041972;Lepidoptera;COI;;;;  
KX041987;Lepidoptera;COI;;;;  
KX044305;Lepidoptera;COI;;;;  
KX044637;Lepidoptera;COI;;;;  
KX044637;Lepidoptera;COI;;;;  
KX044929;Lepidoptera;COI;;;;  
KX044929;Lepidoptera;COI;;;;  
KX045217;Lepidoptera;COI;;;;  
KX045359;Lepidoptera;COI;;;;  
KX045359;Lepidoptera;COI;;;;  
KX045415;Lepidoptera;COI;;;;  
KX045511;Lepidoptera;COI;;;;  
KX045511;Lepidoptera;COI;;;;  
KX045576;Lepidoptera;COI;;;;  
KX045576;Lepidoptera;COI;;;;  
KX046192;Lepidoptera;COI;;;;  
KX046192;Lepidoptera;COI;;;;  
KX046221;Lepidoptera;COI;;;;  
KX046261;Lepidoptera;COI;;;;  
KX047625;Lepidoptera;COI;;;;  
KX047625;Lepidoptera;COI;;;;  
KX047754;Lepidoptera;COI;;;;  
KX048711;Lepidoptera;COI;;;;  
KX048787;Lepidoptera;COI;;;;  
KX049168;Lepidoptera;COI;;;;  
KX049777;Lepidoptera;COI;;;;  
KX049826;Lepidoptera;COI;;;;  
KX049826;Lepidoptera;COI;;;;  
KX051495;Lepidoptera;COI;;;;  
KX071243;Lepidoptera;COI;;;;  
KX071773;Lepidoptera;COI;;;;  
KX130672;Lepidoptera;COI;;;;  
KX130676;Lepidoptera;COI;;;;  
KX130677;Lepidoptera;COI;;;;  
KX130678;Lepidoptera;COI;;;;  
KX130679;Lepidoptera;COI;;;;  
KX130680;Lepidoptera;COI;;;;

KX130681;Lepidoptera;COI;;;;  
KX130687;Lepidoptera;COI;;;;  
KX130688;Lepidoptera;COI;;;;  
KX130689;Lepidoptera;COI;;;;  
KX130690;Lepidoptera;COI;;;;  
KY112799;Lepidoptera;COI;;;;  
KY112800;Lepidoptera;COI;;;;  
KY112801;Lepidoptera;COI;;;;  
KY112802;Lepidoptera;COI;;;;  
KY112803;Lepidoptera;COI;;;;  
KY112804;Lepidoptera;COI;;;;  
KY112805;Lepidoptera;COI;;;;  
KY112806;Lepidoptera;COI;;;;  
KY112807;Lepidoptera;COI;;;;  
KY112808;Lepidoptera;COI;;;;  
KY112809;Lepidoptera;COI;;;;  
KY112810;Lepidoptera;COI;;;;  
KY112811;Lepidoptera;COI;;;;  
KY112812;Lepidoptera;COI;;;;  
KY112813;Lepidoptera;COI;;;;  
KY112814;Lepidoptera;COI;;;;  
KY112815;Lepidoptera;COI;;;;  
KY112816;Lepidoptera;COI;;;;  
KY112817;Lepidoptera;COI;;;;  
KY112818;Lepidoptera;COI;;;;  
KY112819;Lepidoptera;COI;;;;  
KY112820;Lepidoptera;COI;;;;  
KY112821;Lepidoptera;COI;;;;  
KY112822;Lepidoptera;COI;;;;  
KY112823;Lepidoptera;COI;;;;  
KY112825;Lepidoptera;COI;;;;  
KY112826;Lepidoptera;COI;;;;  
KY112827;Lepidoptera;COI;;;;  
KY112828;Lepidoptera;COI;;;;  
KY112829;Lepidoptera;COI;;;;  
KY112830;Lepidoptera;COI;;;;  
KY112831;Lepidoptera;COI;;;;  
KY112832;Lepidoptera;COI;;;;  
KY112833;Lepidoptera;COI;;;;  
KY112834;Lepidoptera;COI;;;;  
KY112835;Lepidoptera;COI;;;;  
KY112836;Lepidoptera;COI;;;;  
KY112837;Lepidoptera;COI;;;;  
KY112838;Lepidoptera;COI;;;;  
KY112839;Lepidoptera;COI;;;;  
KY112840;Lepidoptera;COI;;;;  
KY112841;Lepidoptera;COI;;;;  
KY112842;Lepidoptera;COI;;;;  
KY112843;Lepidoptera;COI;;;;  
KY112844;Lepidoptera;COI;;;;  
KY112845;Lepidoptera;COI;;;;  
KY112846;Lepidoptera;COI;;;;  
KY112847;Lepidoptera;COI;;;;  
KY112848;Lepidoptera;COI;;;;  
KY112849;Lepidoptera;COI;;;;  
KY112850;Lepidoptera;COI;;;;  
KY112852;Lepidoptera;COI;;;;  
KY112853;Lepidoptera;COI;;;;  
KY128337;Lepidoptera;COI;;;;  
KY128362;Lepidoptera;COI;;;;  
KY128366;Lepidoptera;COI;;;;  
KY128368;Lepidoptera;COI;;;;  
KY128376;Lepidoptera;COI;;;;  
LC155510;Lepidoptera;COI;;;;  
LC340452;Lepidoptera;COI;;;;  
LC340458;Lepidoptera;COI;;;;  
LC340462;Lepidoptera;COI;;;;  
LC340480;Lepidoptera;COI;;;;  
LC340481;Lepidoptera;COI;;;;  
LC340496;Lepidoptera;COI;;;;  
LC340566;Lepidoptera;COI;;;;  
LC340579;Lepidoptera;COI;;;;  
LC340580;Lepidoptera;COI;;;;  
LC340581;Lepidoptera;COI;;;;  
LC340582;Lepidoptera;COI;;;;  
LC340583;Lepidoptera;COI;;;;  
LC340584;Lepidoptera;COI;;;;  
LC340585;Lepidoptera;COI;;;;

LC340586;Lepidoptera;COI;;;;  
LC340587;Lepidoptera;COI;;;;  
LC340588;Lepidoptera;COI;;;;  
LC340589;Lepidoptera;COI;;;;  
LC340590;Lepidoptera;COI;;;;  
LC340591;Lepidoptera;COI;;;;  
LC340592;Lepidoptera;COI;;;;  
LC340593;Lepidoptera;COI;;;;  
LC340604;Lepidoptera;COI;;;;  
LC340608;Lepidoptera;COI;;;;  
LC340610;Lepidoptera;COI;;;;  
LC340611;Lepidoptera;COI;;;;  
LC340614;Lepidoptera;COI;;;;  
LC340615;Lepidoptera;COI;;;;  
LC340626;Lepidoptera;COI;;;;  
LC340627;Lepidoptera;COI;;;;  
LC340628;Lepidoptera;COI;;;;  
LC340656;Lepidoptera;COI;;;;  
LC340665;Lepidoptera;COI;;;;  
LC340682;Lepidoptera;COI;;;;  
LC340684;Lepidoptera;COI;;;;  
LC340689;Lepidoptera;COI;;;;  
LC340694;Lepidoptera;COI;;;;  
LC340695;Lepidoptera;COI;;;;  
LC340696;Lepidoptera;COI;;;;  
LC340697;Lepidoptera;COI;;;;  
LC471689;Lepidoptera;COI;;;;  
LC471690;Lepidoptera;COI;;;;  
LC471692;Lepidoptera;COI;;;;  
LC471693;Lepidoptera;COI;;;;  
LC471702;Lepidoptera;COI;;;;  
LC471703;Lepidoptera;COI;;;;  
LC471710;Lepidoptera;COI;;;;  
LC471711;Lepidoptera;COI;;;;  
LC471714;Lepidoptera;COI;;;;  
LT219936;Lepidoptera;COI;;;;  
LT219936;Lepidoptera;COI;;;;  
LT219937;Lepidoptera;COI;;;;  
LT219937;Lepidoptera;COI;;;;  
LT219938;Lepidoptera;COI;;;;  
LT219938;Lepidoptera;COI;;;;  
LT219939;Lepidoptera;COI;;;;  
LT219939;Lepidoptera;COI;;;;  
LT219940;Lepidoptera;COI;;;;  
LT219940;Lepidoptera;COI;;;;  
LT219941;Lepidoptera;COI;;;;  
LT219941;Lepidoptera;COI;;;;  
LT219942;Lepidoptera;COI;;;;  
LT219942;Lepidoptera;COI;;;;  
LT219943;Lepidoptera;COI;;;;  
LT219943;Lepidoptera;COI;;;;  
LT219944;Lepidoptera;COI;;;;  
LT219944;Lepidoptera;COI;;;;  
LT219945;Lepidoptera;COI;;;;  
LT219945;Lepidoptera;COI;;;;  
LT219946;Lepidoptera;COI;;;;  
LT219946;Lepidoptera;COI;;;;  
LT219947;Lepidoptera;COI;;;;  
LT219947;Lepidoptera;COI;;;;  
LT219948;Lepidoptera;COI;;;;  
LT219948;Lepidoptera;COI;;;;  
LT219949;Lepidoptera;COI;;;;  
LT219949;Lepidoptera;COI;;;;  
LT219950;Lepidoptera;COI;;;;  
LT219950;Lepidoptera;COI;;;;  
LT219951;Lepidoptera;COI;;;;  
LT219951;Lepidoptera;COI;;;;  
LT219952;Lepidoptera;COI;;;;  
LT219952;Lepidoptera;COI;;;;  
LT219953;Lepidoptera;COI;;;;  
LT219953;Lepidoptera;COI;;;;  
LT219954;Lepidoptera;COI;;;;  
LT219954;Lepidoptera;COI;;;;  
LT219955;Lepidoptera;COI;;;;  
LT219955;Lepidoptera;COI;;;;  
LT219956;Lepidoptera;COI;;;;  
LT219956;Lepidoptera;COI;;;;  
LT219957;Lepidoptera;COI;;;;

[illegible]

LT219996;Lepidoptera;COI;;;;  
LT219997;Lepidoptera;COI;;;;  
LT219997;Lepidoptera;COI;;;;  
LT219998;Lepidoptera;COI;;;;  
LT219998;Lepidoptera;COI;;;;  
LT219999;Lepidoptera;COI;;;;  
LT219999;Lepidoptera;COI;;;;  
LT220000;Lepidoptera;COI;;;;  
LT220000;Lepidoptera;COI;;;;  
LT220001;Lepidoptera;COI;;;;  
LT220001;Lepidoptera;COI;;;;  
LT220002;Lepidoptera;COI;;;;  
LT220002;Lepidoptera;COI;;;;  
LT220003;Lepidoptera;COI;;;;  
LT220003;Lepidoptera;COI;;;;  
LT220004;Lepidoptera;COI;;;;  
LT220004;Lepidoptera;COI;;;;  
LT220005;Lepidoptera;COI;;;;  
LT220005;Lepidoptera;COI;;;;  
LT220006;Lepidoptera;COI;;;;  
LT220006;Lepidoptera;COI;;;;  
LT220007;Lepidoptera;COI;;;;  
LT220007;Lepidoptera;COI;;;;  
LT220008;Lepidoptera;COI;;;;  
LT220008;Lepidoptera;COI;;;;  
LT220009;Lepidoptera;COI;;;;  
LT220009;Lepidoptera;COI;;;;  
LT220010;Lepidoptera;COI;;;;  
LT220010;Lepidoptera;COI;;;;  
LT220011;Lepidoptera;COI;;;;  
LT220011;Lepidoptera;COI;;;;  
LT220012;Lepidoptera;COI;;;;  
LT220012;Lepidoptera;COI;;;;  
LT220013;Lepidoptera;COI;;;;  
LT220013;Lepidoptera;COI;;;;  
LT220014;Lepidoptera;COI;;;;  
LT220014;Lepidoptera;COI;;;;  
LT220015;Lepidoptera;COI;;;;  
LT220015;Lepidoptera;COI;;;;  
LT220016;Lepidoptera;COI;;;;  
LT220016;Lepidoptera;COI;;;;  
LT220017;Lepidoptera;COI;;;;  
LT220017;Lepidoptera;COI;;;;  
LT628962;Lepidoptera;COI;;;;  
LT628986;Lepidoptera;COI;;;;  
LT628987;Lepidoptera;COI;;;;  
LT628987;Lepidoptera;COI;;;;  
LT628995;Lepidoptera;COI;;;;  
LT628996;Lepidoptera;COI;;;;  
LT628997;Lepidoptera;COI;;;;  
LT986366;Lepidoptera;COI;;;;  
LT986369;Lepidoptera;COI;;;;  
MF141940;Lepidoptera;COI;;;;  
MG779475;Lepidoptera;COI;;;;  
MH006697;Lepidoptera;COI;;;;  
MH235073;Lepidoptera;COI;;;;  
MH235074;Lepidoptera;COI;;;;  
MH235075;Lepidoptera;COI;;;;  
MH235076;Lepidoptera;COI;;;;  
MH235078;Lepidoptera;COI;;;;  
MH235081;Lepidoptera;COI;;;;  
MH235086;Lepidoptera;COI;;;;  
MH235092;Lepidoptera;COI;;;;  
MH235095;Lepidoptera;COI;;;;  
MH235099;Lepidoptera;COI;;;;  
MH235100;Lepidoptera;COI;;;;  
MH235108;Lepidoptera;COI;;;;  
MH235109;Lepidoptera;COI;;;;  
MH235110;Lepidoptera;COI;;;;  
MH235113;Lepidoptera;COI;;;;  
MH235115;Lepidoptera;COI;;;;  
MH235118;Lepidoptera;COI;;;;  
MH235120;Lepidoptera;COI;;;;  
MH235121;Lepidoptera;COI;;;;  
MH235122;Lepidoptera;COI;;;;  
MH235125;Lepidoptera;COI;;;;  
MH235127;Lepidoptera;COI;;;;  
MH235129;Lepidoptera;COI;;;;

MH235131;Lepidoptera;COI;;;;  
MH235132;Lepidoptera;COI;;;;  
MH235133;Lepidoptera;COI;;;;  
MH235137;Lepidoptera;COI;;;;  
MH235138;Lepidoptera;COI;;;;  
MH235141;Lepidoptera;COI;;;;  
MH235145;Lepidoptera;COI;;;;  
MH235146;Lepidoptera;COI;;;;  
MH235149;Lepidoptera;COI;;;;  
MH235151;Lepidoptera;COI;;;;  
MH235152;Lepidoptera;COI;;;;  
MH235153;Lepidoptera;COI;;;;  
MH235157;Lepidoptera;COI;;;;  
MH235159;Lepidoptera;COI;;;;  
MH235160;Lepidoptera;COI;;;;  
MH235162;Lepidoptera;COI;;;;  
MH418510;Lepidoptera;COI;;;;  
MH418525;Lepidoptera;COI;;;;  
MH418532;Lepidoptera;COI;;;;  
MH418535;Lepidoptera;COI;;;;  
MH418543;Lepidoptera;COI;;;;  
MH418544;Lepidoptera;COI;;;;  
MH418568;Lepidoptera;COI;;;;  
MH418667;Lepidoptera;COI;;;;  
MH418682;Lepidoptera;COI;;;;  
MH418693;Lepidoptera;COI;;;;  
MH418694;Lepidoptera;COI;;;;  
MH418704;Lepidoptera;COI;;;;  
MH418709;Lepidoptera;COI;;;;  
MH418716;Lepidoptera;COI;;;;  
MH418719;Lepidoptera;COI;;;;  
MH418723;Lepidoptera;COI;;;;  
MH418754;Lepidoptera;COI;;;;  
MH418800;Lepidoptera;COI;;;;  
MH418859;Lepidoptera;COI;;;;  
MH418883;Lepidoptera;COI;;;;  
MH418949;Lepidoptera;COI;;;;  
MH418990;Lepidoptera;COI;;;;  
MH419013;Lepidoptera;COI;;;;  
MH419020;Lepidoptera;COI;;;;  
MH419033;Lepidoptera;COI;;;;  
MH419045;Lepidoptera;COI;;;;  
MH419054;Lepidoptera;COI;;;;  
MH419091;Lepidoptera;COI;;;;  
MH419105;Lepidoptera;COI;;;;  
MH419109;Lepidoptera;COI;;;;  
MH419171;Lepidoptera;COI;;;;  
MH419180;Lepidoptera;COI;;;;  
MH419196;Lepidoptera;COI;;;;  
MH419235;Lepidoptera;COI;;;;  
MH419236;Lepidoptera;COI;;;;  
MH419241;Lepidoptera;COI;;;;  
MH419250;Lepidoptera;COI;;;;  
MH419259;Lepidoptera;COI;;;;  
MH419263;Lepidoptera;COI;;;;  
MH419294;Lepidoptera;COI;;;;  
MH419296;Lepidoptera;COI;;;;  
MH419296;Lepidoptera;COI;;;;  
MH419302;Lepidoptera;COI;;;;  
MH419304;Lepidoptera;COI;;;;  
MH419306;Lepidoptera;COI;;;;  
MH419350;Lepidoptera;COI;;;;  
MH419382;Lepidoptera;COI;;;;  
MH419469;Lepidoptera;COI;;;;  
MH419488;Lepidoptera;COI;;;;  
MH419511;Lepidoptera;COI;;;;  
MH419512;Lepidoptera;COI;;;;  
MH419528;Lepidoptera;COI;;;;  
MH419561;Lepidoptera;COI;;;;  
MH419567;Lepidoptera;COI;;;;  
MH419584;Lepidoptera;COI;;;;  
MH419613;Lepidoptera;COI;;;;  
MH419651;Lepidoptera;COI;;;;  
MH419659;Lepidoptera;COI;;;;  
MH419754;Lepidoptera;COI;;;;  
MH419780;Lepidoptera;COI;;;;  
MH419793;Lepidoptera;COI;;;;  
MH419808;Lepidoptera;COI;;;;



MH419811;Lepidoptera;COI;;;;  
MH419820;Lepidoptera;COI;;;;  
MH419845;Lepidoptera;COI;;;;  
MH419857;Lepidoptera;COI;;;;  
MH419857;Lepidoptera;COI;;;;  
MH419870;Lepidoptera;COI;;;;  
MH419889;Lepidoptera;COI;;;;  
MH419898;Lepidoptera;COI;;;;  
MH419906;Lepidoptera;COI;;;;  
MH419917;Lepidoptera;COI;;;;  
MH419973;Lepidoptera;COI;;;;  
MH420060;Lepidoptera;COI;;;;  
MH420107;Lepidoptera;COI;;;;  
MH420124;Lepidoptera;COI;;;;  
MH420126;Lepidoptera;COI;;;;  
MH420130;Lepidoptera;COI;;;;  
MH420185;Lepidoptera;COI;;;;  
MH420219;Lepidoptera;COI;;;;  
MH420220;Lepidoptera;COI;;;;  
MH420225;Lepidoptera;COI;;;;  
MH420248;Lepidoptera;COI;;;;  
MH420263;Lepidoptera;COI;;;;  
MH420300;Lepidoptera;COI;;;;  
MH420332;Lepidoptera;COI;;;;  
MH420340;Lepidoptera;COI;;;;  
MH420378;Lepidoptera;COI;;;;  
MH420415;Lepidoptera;COI;;;;  
MH670125;Lepidoptera;COI;;;;  
MH670137;Lepidoptera;COI;;;;  
MH670219;Lepidoptera;COI;;;;  
MK186158;Lepidoptera;COI;;;;  
MK186214;Lepidoptera;COI;;;;  
MK186215;Lepidoptera;COI;;;;  
MK186216;Lepidoptera;COI;;;;  
MK186217;Lepidoptera;COI;;;;  
MK186218;Lepidoptera;COI;;;;  
MK186219;Lepidoptera;COI;;;;  
MK186220;Lepidoptera;COI;;;;  
MK186221;Lepidoptera;COI;;;;  
MK186222;Lepidoptera;COI;;;;  
MK186224;Lepidoptera;COI;;;;  
MK186225;Lepidoptera;COI;;;;  
MK186226;Lepidoptera;COI;;;;  
MK186227;Lepidoptera;COI;;;;  
MK186228;Lepidoptera;COI;;;;  
MK186246;Lepidoptera;COI;;;;  
MK186247;Lepidoptera;COI;;;;  
MK186248;Lepidoptera;COI;;;;  
MK186249;Lepidoptera;COI;;;;  
MK186250;Lepidoptera;COI;;;;  
MK186251;Lepidoptera;COI;;;;  
MK186252;Lepidoptera;COI;;;;  
MK186259;Lepidoptera;COI;;;;  
MK186260;Lepidoptera;COI;;;;  
MK186267;Lepidoptera;COI;;;;  
MK186268;Lepidoptera;COI;;;;  
MK186288;Lepidoptera;COI;;;;  
MK186289;Lepidoptera;COI;;;;  
MK186290;Lepidoptera;COI;;;;  
MK186291;Lepidoptera;COI;;;;  
MK186292;Lepidoptera;COI;;;;  
MK186293;Lepidoptera;COI;;;;  
MK186317;Lepidoptera;COI;;;;  
MK186318;Lepidoptera;COI;;;;  
MK186320;Lepidoptera;COI;;;;  
MK186347;Lepidoptera;COI;;;;  
MK186369;Lepidoptera;COI;;;;  
MK186370;Lepidoptera;COI;;;;  
MK186371;Lepidoptera;COI;;;;  
MK186373;Lepidoptera;COI;;;;  
MK186374;Lepidoptera;COI;;;;  
MK186375;Lepidoptera;COI;;;;  
MK186376;Lepidoptera;COI;;;;  
MK186377;Lepidoptera;COI;;;;  
MK186398;Lepidoptera;COI;;;;  
MK186399;Lepidoptera;COI;;;;  
MK186400;Lepidoptera;COI;;;;  
MK186405;Lepidoptera;COI;;;;

MK186413;Lepidoptera;COI;;;;  
MK186414;Lepidoptera;COI;;;;  
MK186415;Lepidoptera;COI;;;;  
MK186527;Lepidoptera;COI;;;;  
MK186529;Lepidoptera;COI;;;;  
MK186530;Lepidoptera;COI;;;;  
MK186531;Lepidoptera;COI;;;;  
MK186532;Lepidoptera;COI;;;;  
MK186533;Lepidoptera;COI;;;;  
MK186534;Lepidoptera;COI;;;;  
MK186535;Lepidoptera;COI;;;;  
MK186562;Lepidoptera;COI;;;;  
MK186565;Lepidoptera;COI;;;;  
MK186568;Lepidoptera;COI;;;;  
MK186570;Lepidoptera;COI;;;;  
MK186645;Lepidoptera;COI;;;;  
MK186646;Lepidoptera;COI;;;;  
MK186647;Lepidoptera;COI;;;;  
MK186648;Lepidoptera;COI;;;;  
MK186671;Lepidoptera;COI;;;;  
MK186673;Lepidoptera;COI;;;;  
MK186674;Lepidoptera;COI;;;;  
MK186674;Lepidoptera;COI;;;;  
MK186675;Lepidoptera;COI;;;;  
MK186675;Lepidoptera;COI;;;;  
MK186676;Lepidoptera;COI;;;;  
MK186676;Lepidoptera;COI;;;;  
MK186677;Lepidoptera;COI;;;;  
MK186677;Lepidoptera;COI;;;;  
MK186678;Lepidoptera;COI;;;;  
MK186678;Lepidoptera;COI;;;;  
MK186679;Lepidoptera;COI;;;;  
MK186679;Lepidoptera;COI;;;;  
MK186680;Lepidoptera;COI;;;;  
MK186681;Lepidoptera;COI;;;;  
MK186683;Lepidoptera;COI;;;;  
MK186684;Lepidoptera;COI;;;;  
MK186717;Lepidoptera;COI;;;;  
MK186718;Lepidoptera;COI;;;;  
MK186719;Lepidoptera;COI;;;;  
MK186720;Lepidoptera;COI;;;;  
MK186720;Lepidoptera;COI;;;;  
MK186721;Lepidoptera;COI;;;;  
MK186721;Lepidoptera;COI;;;;  
MK186722;Lepidoptera;COI;;;;  
MK186722;Lepidoptera;COI;;;;  
MK186723;Lepidoptera;COI;;;;  
MK186723;Lepidoptera;COI;;;;  
MK186758;Lepidoptera;COI;;;;  
MK186759;Lepidoptera;COI;;;;  
MK186760;Lepidoptera;COI;;;;  
MK186777;Lepidoptera;COI;;;;  
MK186782;Lepidoptera;COI;;;;  
MK186784;Lepidoptera;COI;;;;  
MK541994;Lepidoptera;COI;;;;  
MK567858;Lepidoptera;COI;;;;  
MK567859;Lepidoptera;COI;;;;  
MK567860;Lepidoptera;COI;;;;  
MN138473;Lepidoptera;COI;;;;  
MN138473;Lepidoptera;COI;;;;  
MN138500;Lepidoptera;COI;;;;  
MN138514;Lepidoptera;COI;;;;  
MN138518;Lepidoptera;COI;;;;  
MN138524;Lepidoptera;COI;;;;  
MN138542;Lepidoptera;COI;;;;  
MN138543;Lepidoptera;COI;;;;  
MN138574;Lepidoptera;COI;;;;  
MN138608;Lepidoptera;COI;;;;  
MN138616;Lepidoptera;COI;;;;  
MN138616;Lepidoptera;COI;;;;  
MN138663;Lepidoptera;COI;;;;  
MN138664;Lepidoptera;COI;;;;  
MN138669;Lepidoptera;COI;;;;  
MN138678;Lepidoptera;COI;;;;  
MN138681;Lepidoptera;COI;;;;  
MN138687;Lepidoptera;COI;;;;  
MN138720;Lepidoptera;COI;;;;  
MN138733;Lepidoptera;COI;;;;

MN138733;Lepidoptera;COI;;;;  
MN138734;Lepidoptera;COI;;;;  
MN138742;Lepidoptera;COI;;;;  
MN138746;Lepidoptera;COI;;;;  
MN138759;Lepidoptera;COI;;;;  
MN138764;Lepidoptera;COI;;;;  
MN138771;Lepidoptera;COI;;;;  
MN138772;Lepidoptera;COI;;;;  
MN138774;Lepidoptera;COI;;;;  
MN138800;Lepidoptera;COI;;;;  
MN138809;Lepidoptera;COI;;;;  
MN138812;Lepidoptera;COI;;;;  
MN138812;Lepidoptera;COI;;;;  
MN138814;Lepidoptera;COI;;;;  
MN138841;Lepidoptera;COI;;;;  
MN138856;Lepidoptera;COI;;;;  
MN138875;Lepidoptera;COI;;;;  
MN138879;Lepidoptera;COI;;;;  
MN138887;Lepidoptera;COI;;;;  
MN138889;Lepidoptera;COI;;;;  
MN138894;Lepidoptera;COI;;;;  
MN138921;Lepidoptera;COI;;;;  
MN138944;Lepidoptera;COI;;;;  
MN138947;Lepidoptera;COI;;;;  
MN138970;Lepidoptera;COI;;;;  
MN138972;Lepidoptera;COI;;;;  
MN138974;Lepidoptera;COI;;;;  
MN138979;Lepidoptera;COI;;;;  
MN138993;Lepidoptera;COI;;;;  
MN138999;Lepidoptera;COI;;;;  
MN138999;Lepidoptera;COI;;;;  
MN139005;Lepidoptera;COI;;;;  
MN139007;Lepidoptera;COI;;;;  
MN139008;Lepidoptera;COI;;;;  
MN139026;Lepidoptera;COI;;;;  
MN139030;Lepidoptera;COI;;;;  
MN139044;Lepidoptera;COI;;;;  
MN139063;Lepidoptera;COI;;;;  
MN139076;Lepidoptera;COI;;;;  
MN139102;Lepidoptera;COI;;;;  
MN139103;Lepidoptera;COI;;;;  
MN139119;Lepidoptera;COI;;;;  
MN139136;Lepidoptera;COI;;;;  
MN139142;Lepidoptera;COI;;;;  
MN139143;Lepidoptera;COI;;;;  
MN139185;Lepidoptera;COI;;;;  
MN139186;Lepidoptera;COI;;;;  
MN139201;Lepidoptera;COI;;;;  
MN139207;Lepidoptera;COI;;;;  
MN139216;Lepidoptera;COI;;;;  
MN139250;Lepidoptera;COI;;;;  
MN139261;Lepidoptera;COI;;;;  
MN139261;Lepidoptera;COI;;;;  
MN139269;Lepidoptera;COI;;;;  
MN139297;Lepidoptera;COI;;;;  
MN139303;Lepidoptera;COI;;;;  
MN139306;Lepidoptera;COI;;;;  
MN139310;Lepidoptera;COI;;;;  
MN139310;Lepidoptera;COI;;;;  
MN139323;Lepidoptera;COI;;;;  
MN139335;Lepidoptera;COI;;;;  
MN139347;Lepidoptera;COI;;;;  
MN139347;Lepidoptera;COI;;;;  
MN139348;Lepidoptera;COI;;;;  
MN139363;Lepidoptera;COI;;;;  
MN139364;Lepidoptera;COI;;;;  
MN139378;Lepidoptera;COI;;;;  
MN139385;Lepidoptera;COI;;;;  
MN139395;Lepidoptera;COI;;;;  
MN139406;Lepidoptera;COI;;;;  
MN139416;Lepidoptera;COI;;;;  
MN139424;Lepidoptera;COI;;;;  
MN139429;Lepidoptera;COI;;;;  
MN139442;Lepidoptera;COI;;;;  
MN139445;Lepidoptera;COI;;;;  
MN139462;Lepidoptera;COI;;;;  
MN139462;Lepidoptera;COI;;;;  
MN139466;Lepidoptera;COI;;;;

MN139469;Lepidoptera;COI;;;;  
MN139479;Lepidoptera;COI;;;;  
MN139499;Lepidoptera;COI;;;;  
MN139499;Lepidoptera;COI;;;;  
MN139507;Lepidoptera;COI;;;;  
MN139532;Lepidoptera;COI;;;;  
MN139546;Lepidoptera;COI;;;;  
MN139547;Lepidoptera;COI;;;;  
MN139555;Lepidoptera;COI;;;;  
MN139555;Lepidoptera;COI;;;;  
MN139576;Lepidoptera;COI;;;;  
MN139576;Lepidoptera;COI;;;;  
MN139599;Lepidoptera;COI;;;;  
MN139607;Lepidoptera;COI;;;;  
MN139631;Lepidoptera;COI;;;;  
MN139645;Lepidoptera;COI;;;;  
MN139666;Lepidoptera;COI;;;;  
MN139683;Lepidoptera;COI;;;;  
MN139699;Lepidoptera;COI;;;;  
MN139715;Lepidoptera;COI;;;;  
MN139722;Lepidoptera;COI;;;;  
MN139722;Lepidoptera;COI;;;;  
MN139726;Lepidoptera;COI;;;;  
MN139743;Lepidoptera;COI;;;;  
MN139757;Lepidoptera;COI;;;;  
MN139759;Lepidoptera;COI;;;;  
MN139772;Lepidoptera;COI;;;;  
MN139776;Lepidoptera;COI;;;;  
MN139780;Lepidoptera;COI;;;;  
MN139788;Lepidoptera;COI;;;;  
MN139825;Lepidoptera;COI;;;;  
MN139858;Lepidoptera;COI;;;;  
MN139865;Lepidoptera;COI;;;;  
MN139875;Lepidoptera;COI;;;;  
MN139918;Lepidoptera;COI;;;;  
MN139944;Lepidoptera;COI;;;;  
MN139955;Lepidoptera;COI;;;;  
MN139955;Lepidoptera;COI;;;;  
MN139966;Lepidoptera;COI;;;;  
MN139974;Lepidoptera;COI;;;;  
MN139974;Lepidoptera;COI;;;;  
MN139981;Lepidoptera;COI;;;;  
MN139981;Lepidoptera;COI;;;;  
MN139994;Lepidoptera;COI;;;;  
MN139999;Lepidoptera;COI;;;;  
MN140002;Lepidoptera;COI;;;;  
MN140002;Lepidoptera;COI;;;;  
MN140007;Lepidoptera;COI;;;;  
MN140010;Lepidoptera;COI;;;;  
MN140017;Lepidoptera;COI;;;;  
MN140044;Lepidoptera;COI;;;;  
MN140064;Lepidoptera;COI;;;;  
MN140065;Lepidoptera;COI;;;;  
MN140073;Lepidoptera;COI;;;;  
MN140099;Lepidoptera;COI;;;;  
MN140119;Lepidoptera;COI;;;;  
MN140133;Lepidoptera;COI;;;;  
MN140163;Lepidoptera;COI;;;;  
MN140168;Lepidoptera;COI;;;;  
MN140168;Lepidoptera;COI;;;;  
MN140170;Lepidoptera;COI;;;;  
MN140174;Lepidoptera;COI;;;;  
MN140190;Lepidoptera;COI;;;;  
MN140236;Lepidoptera;COI;;;;  
MN140237;Lepidoptera;COI;;;;  
MN140269;Lepidoptera;COI;;;;  
MN140294;Lepidoptera;COI;;;;  
MN140301;Lepidoptera;COI;;;;  
MN140301;Lepidoptera;COI;;;;  
MN140314;Lepidoptera;COI;;;;  
MN140323;Lepidoptera;COI;;;;  
MN140336;Lepidoptera;COI;;;;  
MN140345;Lepidoptera;COI;;;;  
MN140372;Lepidoptera;COI;;;;  
MN140396;Lepidoptera;COI;;;;  
MN140407;Lepidoptera;COI;;;;  
MN140427;Lepidoptera;COI;;;;  
MN140431;Lepidoptera;COI;;;;

MN140451;Lepidoptera;COI;;;;  
MN140493;Lepidoptera;COI;;;;  
MN140503;Lepidoptera;COI;;;;  
MN140525;Lepidoptera;COI;;;;  
MN140543;Lepidoptera;COI;;;;  
MN140549;Lepidoptera;COI;;;;  
MN140553;Lepidoptera;COI;;;;  
MN140559;Lepidoptera;COI;;;;  
MN140566;Lepidoptera;COI;;;;  
MN140566;Lepidoptera;COI;;;;  
MN140572;Lepidoptera;COI;;;;  
MN140603;Lepidoptera;COI;;;;  
MN140614;Lepidoptera;COI;;;;  
MN140614;Lepidoptera;COI;;;;  
MN140634;Lepidoptera;COI;;;;  
MN140636;Lepidoptera;COI;;;;  
MN140650;Lepidoptera;COI;;;;  
MN140650;Lepidoptera;COI;;;;  
MN140653;Lepidoptera;COI;;;;  
MN140671;Lepidoptera;COI;;;;  
MN140695;Lepidoptera;COI;;;;  
MN140695;Lepidoptera;COI;;;;  
MN140705;Lepidoptera;COI;;;;  
MN140715;Lepidoptera;COI;;;;  
MN140724;Lepidoptera;COI;;;;  
MN140744;Lepidoptera;COI;;;;  
MN140752;Lepidoptera;COI;;;;  
MN140792;Lepidoptera;COI;;;;  
MN140817;Lepidoptera;COI;;;;  
MN140826;Lepidoptera;COI;;;;  
MN140832;Lepidoptera;COI;;;;  
MN140836;Lepidoptera;COI;;;;  
MN140836;Lepidoptera;COI;;;;  
MN140839;Lepidoptera;COI;;;;  
MN140839;Lepidoptera;COI;;;;  
MN140844;Lepidoptera;COI;;;;  
MN140844;Lepidoptera;COI;;;;  
MN140845;Lepidoptera;COI;;;;  
MN140847;Lepidoptera;COI;;;;  
MN140856;Lepidoptera;COI;;;;  
MN140862;Lepidoptera;COI;;;;  
MN140867;Lepidoptera;COI;;;;  
MN140868;Lepidoptera;COI;;;;  
MN140881;Lepidoptera;COI;;;;  
MN140899;Lepidoptera;COI;;;;  
MN140908;Lepidoptera;COI;;;;  
MN140951;Lepidoptera;COI;;;;  
MN140959;Lepidoptera;COI;;;;  
MN140996;Lepidoptera;COI;;;;  
MN140997;Lepidoptera;COI;;;;  
MN140998;Lepidoptera;COI;;;;  
MN140999;Lepidoptera;COI;;;;  
MN141007;Lepidoptera;COI;;;;  
MN141024;Lepidoptera;COI;;;;  
MN141025;Lepidoptera;COI;;;;  
MN141026;Lepidoptera;COI;;;;  
MN141032;Lepidoptera;COI;;;;  
MN141043;Lepidoptera;COI;;;;  
MN141050;Lepidoptera;COI;;;;  
MN141055;Lepidoptera;COI;;;;  
MN141066;Lepidoptera;COI;;;;  
MN141068;Lepidoptera;COI;;;;  
MN141074;Lepidoptera;COI;;;;  
MN141083;Lepidoptera;COI;;;;  
MN141117;Lepidoptera;COI;;;;  
MN141131;Lepidoptera;COI;;;;  
MN141133;Lepidoptera;COI;;;;  
MN141138;Lepidoptera;COI;;;;  
MN141138;Lepidoptera;COI;;;;  
MN141142;Lepidoptera;COI;;;;  
MN141156;Lepidoptera;COI;;;;  
MN141176;Lepidoptera;COI;;;;  
MN141182;Lepidoptera;COI;;;;  
MN141192;Lepidoptera;COI;;;;  
MN141220;Lepidoptera;COI;;;;  
MN141246;Lepidoptera;COI;;;;  
MN141257;Lepidoptera;COI;;;;  
MN141260;Lepidoptera;COI;;;;

MN141267;Lepidoptera;COI;;;;  
MN141270;Lepidoptera;COI;;;;  
MN141276;Lepidoptera;COI;;;;  
MN141287;Lepidoptera;COI;;;;  
MN141290;Lepidoptera;COI;;;;  
MN141307;Lepidoptera;COI;;;;  
MN141334;Lepidoptera;COI;;;;  
MN141347;Lepidoptera;COI;;;;  
MN141347;Lepidoptera;COI;;;;  
MN141354;Lepidoptera;COI;;;;  
MN141354;Lepidoptera;COI;;;;  
MN141355;Lepidoptera;COI;;;;  
MN141366;Lepidoptera;COI;;;;  
MN141368;Lepidoptera;COI;;;;  
MN141383;Lepidoptera;COI;;;;  
MN141396;Lepidoptera;COI;;;;  
MN141400;Lepidoptera;COI;;;;  
MN141404;Lepidoptera;COI;;;;  
MN141404;Lepidoptera;COI;;;;  
MN141408;Lepidoptera;COI;;;;  
MN141412;Lepidoptera;COI;;;;  
MN141414;Lepidoptera;COI;;;;  
MN141419;Lepidoptera;COI;;;;  
MN141440;Lepidoptera;COI;;;;  
MN141440;Lepidoptera;COI;;;;  
MN141467;Lepidoptera;COI;;;;  
MN141487;Lepidoptera;COI;;;;  
MN141493;Lepidoptera;COI;;;;  
MN141508;Lepidoptera;COI;;;;  
MN141509;Lepidoptera;COI;;;;  
MN141512;Lepidoptera;COI;;;;  
MN141513;Lepidoptera;COI;;;;  
MN141527;Lepidoptera;COI;;;;  
MN141552;Lepidoptera;COI;;;;  
MN141574;Lepidoptera;COI;;;;  
MN141585;Lepidoptera;COI;;;;  
MN141595;Lepidoptera;COI;;;;  
MN141608;Lepidoptera;COI;;;;  
MN141618;Lepidoptera;COI;;;;  
MN141628;Lepidoptera;COI;;;;  
MN141634;Lepidoptera;COI;;;;  
MN141634;Lepidoptera;COI;;;;  
MN141646;Lepidoptera;COI;;;;  
MN141648;Lepidoptera;COI;;;;  
MN141649;Lepidoptera;COI;;;;  
MN141672;Lepidoptera;COI;;;;  
MN141675;Lepidoptera;COI;;;;  
MN141690;Lepidoptera;COI;;;;  
MN141701;Lepidoptera;COI;;;;  
MN141715;Lepidoptera;COI;;;;  
MN141748;Lepidoptera;COI;;;;  
MN141753;Lepidoptera;COI;;;;  
MN141756;Lepidoptera;COI;;;;  
MN141763;Lepidoptera;COI;;;;  
MN141789;Lepidoptera;COI;;;;  
MN141800;Lepidoptera;COI;;;;  
MN141806;Lepidoptera;COI;;;;  
MN141816;Lepidoptera;COI;;;;  
MN141832;Lepidoptera;COI;;;;  
MN141854;Lepidoptera;COI;;;;  
MN141857;Lepidoptera;COI;;;;  
MN141866;Lepidoptera;COI;;;;  
MN141897;Lepidoptera;COI;;;;  
MN141899;Lepidoptera;COI;;;;  
MN141913;Lepidoptera;COI;;;;  
MN141932;Lepidoptera;COI;;;;  
MN141939;Lepidoptera;COI;;;;  
MN141965;Lepidoptera;COI;;;;  
MN141981;Lepidoptera;COI;;;;  
MN141981;Lepidoptera;COI;;;;  
MN141982;Lepidoptera;COI;;;;  
MN141982;Lepidoptera;COI;;;;  
MN141985;Lepidoptera;COI;;;;  
MN141995;Lepidoptera;COI;;;;  
MN141996;Lepidoptera;COI;;;;  
MN142002;Lepidoptera;COI;;;;  
MN142021;Lepidoptera;COI;;;;  
MN142022;Lepidoptera;COI;;;;

MN142027;Lepidoptera;COI;;;;  
MN142038;Lepidoptera;COI;;;;  
MN142039;Lepidoptera;COI;;;;  
MN142064;Lepidoptera;COI;;;;  
MN142103;Lepidoptera;COI;;;;  
MN142124;Lepidoptera;COI;;;;  
MN142124;Lepidoptera;COI;;;;  
MN142138;Lepidoptera;COI;;;;  
MN142138;Lepidoptera;COI;;;;  
MN142142;Lepidoptera;COI;;;;  
MN142164;Lepidoptera;COI;;;;  
MN142184;Lepidoptera;COI;;;;  
MN142240;Lepidoptera;COI;;;;  
MN142259;Lepidoptera;COI;;;;  
MN142267;Lepidoptera;COI;;;;  
MN142270;Lepidoptera;COI;;;;  
MN142293;Lepidoptera;COI;;;;  
MN142321;Lepidoptera;COI;;;;  
MN142357;Lepidoptera;COI;;;;  
MN142370;Lepidoptera;COI;;;;  
MN142376;Lepidoptera;COI;;;;  
MN142396;Lepidoptera;COI;;;;  
MN142413;Lepidoptera;COI;;;;  
MN142421;Lepidoptera;COI;;;;  
MN142429;Lepidoptera;COI;;;;  
MN142430;Lepidoptera;COI;;;;  
MN142435;Lepidoptera;COI;;;;  
MN142446;Lepidoptera;COI;;;;  
MN142446;Lepidoptera;COI;;;;  
MN142453;Lepidoptera;COI;;;;  
MN142467;Lepidoptera;COI;;;;  
MN142487;Lepidoptera;COI;;;;  
MN142489;Lepidoptera;COI;;;;  
MN142511;Lepidoptera;COI;;;;  
MN142514;Lepidoptera;COI;;;;  
MN142515;Lepidoptera;COI;;;;  
MN142525;Lepidoptera;COI;;;;  
MN142525;Lepidoptera;COI;;;;  
MN142535;Lepidoptera;COI;;;;  
MN142549;Lepidoptera;COI;;;;  
MN142550;Lepidoptera;COI;;;;  
MN142598;Lepidoptera;COI;;;;  
MN142601;Lepidoptera;COI;;;;  
MN142602;Lepidoptera;COI;;;;  
MN142605;Lepidoptera;COI;;;;  
MN142611;Lepidoptera;COI;;;;  
MN142616;Lepidoptera;COI;;;;  
MN142641;Lepidoptera;COI;;;;  
MN142641;Lepidoptera;COI;;;;  
MN142662;Lepidoptera;COI;;;;  
MN142670;Lepidoptera;COI;;;;  
MN142685;Lepidoptera;COI;;;;  
MN142702;Lepidoptera;COI;;;;  
MN142705;Lepidoptera;COI;;;;  
MN142736;Lepidoptera;COI;;;;  
MN142751;Lepidoptera;COI;;;;  
MN142757;Lepidoptera;COI;;;;  
MN142769;Lepidoptera;COI;;;;  
MN142772;Lepidoptera;COI;;;;  
MN142777;Lepidoptera;COI;;;;  
MN142777;Lepidoptera;COI;;;;  
MN142794;Lepidoptera;COI;;;;  
MN142804;Lepidoptera;COI;;;;  
MN142811;Lepidoptera;COI;;;;  
MN142812;Lepidoptera;COI;;;;  
MN142812;Lepidoptera;COI;;;;  
MN142894;Lepidoptera;COI;;;;  
MN142917;Lepidoptera;COI;;;;  
MN142941;Lepidoptera;COI;;;;  
MN142945;Lepidoptera;COI;;;;  
MN142957;Lepidoptera;COI;;;;  
MN142958;Lepidoptera;COI;;;;  
MN142961;Lepidoptera;COI;;;;  
MN142961;Lepidoptera;COI;;;;  
MN142989;Lepidoptera;COI;;;;  
MN142996;Lepidoptera;COI;;;;  
MN143009;Lepidoptera;COI;;;;  
MN143018;Lepidoptera;COI;;;;

MN143028;Lepidoptera;COI;;;;  
MN143034;Lepidoptera;COI;;;;  
MN143034;Lepidoptera;COI;;;;  
MN143039;Lepidoptera;COI;;;;  
MN143057;Lepidoptera;COI;;;;  
MN143072;Lepidoptera;COI;;;;  
MN143091;Lepidoptera;COI;;;;  
MN143099;Lepidoptera;COI;;;;  
MN143100;Lepidoptera;COI;;;;  
MN143123;Lepidoptera;COI;;;;  
MN143128;Lepidoptera;COI;;;;  
MN143138;Lepidoptera;COI;;;;  
MN143171;Lepidoptera;COI;;;;  
MN143179;Lepidoptera;COI;;;;  
MN143184;Lepidoptera;COI;;;;  
MN143214;Lepidoptera;COI;;;;  
MN143225;Lepidoptera;COI;;;;  
MN143249;Lepidoptera;COI;;;;  
MN143264;Lepidoptera;COI;;;;  
MN143272;Lepidoptera;COI;;;;  
MN143273;Lepidoptera;COI;;;;  
MN143281;Lepidoptera;COI;;;;  
MN143317;Lepidoptera;COI;;;;  
MN143333;Lepidoptera;COI;;;;  
MN143357;Lepidoptera;COI;;;;  
MN143357;Lepidoptera;COI;;;;  
MN143376;Lepidoptera;COI;;;;  
MN143378;Lepidoptera;COI;;;;  
MN143389;Lepidoptera;COI;;;;  
MN143400;Lepidoptera;COI;;;;  
MN143405;Lepidoptera;COI;;;;  
MN143435;Lepidoptera;COI;;;;  
MN143444;Lepidoptera;COI;;;;  
MN143449;Lepidoptera;COI;;;;  
MN143468;Lepidoptera;COI;;;;  
MN143474;Lepidoptera;COI;;;;  
MN143486;Lepidoptera;COI;;;;  
MN143500;Lepidoptera;COI;;;;  
MN143504;Lepidoptera;COI;;;;  
MN143514;Lepidoptera;COI;;;;  
MN143583;Lepidoptera;COI;;;;  
MN143600;Lepidoptera;COI;;;;  
MN143610;Lepidoptera;COI;;;;  
MN143637;Lepidoptera;COI;;;;  
MN143663;Lepidoptera;COI;;;;  
MN143669;Lepidoptera;COI;;;;  
MN143688;Lepidoptera;COI;;;;  
MN143688;Lepidoptera;COI;;;;  
MN143695;Lepidoptera;COI;;;;  
MN143710;Lepidoptera;COI;;;;  
MN143727;Lepidoptera;COI;;;;  
MN143732;Lepidoptera;COI;;;;  
MN143732;Lepidoptera;COI;;;;  
MN143740;Lepidoptera;COI;;;;  
MN143746;Lepidoptera;COI;;;;  
MN143753;Lepidoptera;COI;;;;  
MN143770;Lepidoptera;COI;;;;  
MN143771;Lepidoptera;COI;;;;  
MN143779;Lepidoptera;COI;;;;  
MN143784;Lepidoptera;COI;;;;  
MN143786;Lepidoptera;COI;;;;  
MN143805;Lepidoptera;COI;;;;  
MN143806;Lepidoptera;COI;;;;  
MN143820;Lepidoptera;COI;;;;  
MN143828;Lepidoptera;COI;;;;  
MN143852;Lepidoptera;COI;;;;  
MN143873;Lepidoptera;COI;;;;  
MN143874;Lepidoptera;COI;;;;  
MN143900;Lepidoptera;COI;;;;  
MN143903;Lepidoptera;COI;;;;  
MN143911;Lepidoptera;COI;;;;  
MN143912;Lepidoptera;COI;;;;  
MN143915;Lepidoptera;COI;;;;  
MN143922;Lepidoptera;COI;;;;  
MN143925;Lepidoptera;COI;;;;  
MN143935;Lepidoptera;COI;;;;  
MN143980;Lepidoptera;COI;;;;  
MN144006;Lepidoptera;COI;;;;



MN144007;Lepidoptera;COI;;;;  
MN144009;Lepidoptera;COI;;;;  
MN144010;Lepidoptera;COI;;;;  
MN144059;Lepidoptera;COI;;;;  
MN144063;Lepidoptera;COI;;;;  
MN144067;Lepidoptera;COI;;;;  
MN144071;Lepidoptera;COI;;;;  
MN144119;Lepidoptera;COI;;;;  
MN144119;Lepidoptera;COI;;;;  
MN144123;Lepidoptera;COI;;;;  
MN144131;Lepidoptera;COI;;;;  
MN144134;Lepidoptera;COI;;;;  
MN144148;Lepidoptera;COI;;;;  
MN144198;Lepidoptera;COI;;;;  
MN144219;Lepidoptera;COI;;;;  
MN144250;Lepidoptera;COI;;;;  
MN144250;Lepidoptera;COI;;;;  
MN144256;Lepidoptera;COI;;;;  
MN144261;Lepidoptera;COI;;;;  
MN144265;Lepidoptera;COI;;;;  
MN144282;Lepidoptera;COI;;;;  
MN144296;Lepidoptera;COI;;;;  
MN144297;Lepidoptera;COI;;;;  
MN144304;Lepidoptera;COI;;;;  
MN144308;Lepidoptera;COI;;;;  
MN144320;Lepidoptera;COI;;;;  
MN144323;Lepidoptera;COI;;;;  
MN144324;Lepidoptera;COI;;;;  
MN144327;Lepidoptera;COI;;;;  
MN144332;Lepidoptera;COI;;;;  
MN144332;Lepidoptera;COI;;;;  
MN144345;Lepidoptera;COI;;;;  
MN144350;Lepidoptera;COI;;;;  
MN144367;Lepidoptera;COI;;;;  
MN144382;Lepidoptera;COI;;;;  
MN144389;Lepidoptera;COI;;;;  
MN144421;Lepidoptera;COI;;;;  
MN144421;Lepidoptera;COI;;;;  
MN144434;Lepidoptera;COI;;;;  
MN144435;Lepidoptera;COI;;;;  
MN144442;Lepidoptera;COI;;;;  
MN144456;Lepidoptera;COI;;;;  
MN144458;Lepidoptera;COI;;;;  
MN144463;Lepidoptera;COI;;;;  
MN144463;Lepidoptera;COI;;;;  
MN144486;Lepidoptera;COI;;;;  
MN144497;Lepidoptera;COI;;;;  
MN144501;Lepidoptera;COI;;;;  
MN144502;Lepidoptera;COI;;;;  
MN144504;Lepidoptera;COI;;;;  
MN144515;Lepidoptera;COI;;;;  
MN144533;Lepidoptera;COI;;;;  
MN144546;Lepidoptera;COI;;;;  
MN144554;Lepidoptera;COI;;;;  
MN144582;Lepidoptera;COI;;;;  
MN144583;Lepidoptera;COI;;;;  
MN144591;Lepidoptera;COI;;;;  
MN144592;Lepidoptera;COI;;;;  
MN144595;Lepidoptera;COI;;;;  
MN144602;Lepidoptera;COI;;;;  
MN144602;Lepidoptera;COI;;;;  
MN144632;Lepidoptera;COI;;;;  
MN144632;Lepidoptera;COI;;;;  
MN144635;Lepidoptera;COI;;;;  
MN144637;Lepidoptera;COI;;;;  
MN144637;Lepidoptera;COI;;;;  
MN144644;Lepidoptera;COI;;;;  
MN144649;Lepidoptera;COI;;;;  
MN144695;Lepidoptera;COI;;;;  
MN144726;Lepidoptera;COI;;;;  
MN144730;Lepidoptera;COI;;;;  
MN144734;Lepidoptera;COI;;;;  
MN144743;Lepidoptera;COI;;;;  
MN144749;Lepidoptera;COI;;;;  
MN144763;Lepidoptera;COI;;;;  
MN144763;Lepidoptera;COI;;;;  
MN144766;Lepidoptera;COI;;;;  
MN144771;Lepidoptera;COI;;;;

MN144771;Lepidoptera;COI;;;;  
MN144818;Lepidoptera;COI;;;;  
MN144818;Lepidoptera;COI;;;;  
MN144821;Lepidoptera;COI;;;;  
MN144828;Lepidoptera;COI;;;;  
MN144828;Lepidoptera;COI;;;;  
MN144856;Lepidoptera;COI;;;;  
MN144873;Lepidoptera;COI;;;;  
MN144873;Lepidoptera;COI;;;;  
MN144909;Lepidoptera;COI;;;;  
MN144909;Lepidoptera;COI;;;;  
MN144928;Lepidoptera;COI;;;;  
MN144937;Lepidoptera;COI;;;;  
MN144941;Lepidoptera;COI;;;;  
MN144944;Lepidoptera;COI;;;;  
MN144945;Lepidoptera;COI;;;;  
MN144952;Lepidoptera;COI;;;;  
MN144978;Lepidoptera;COI;;;;  
MN144981;Lepidoptera;COI;;;;  
MN144982;Lepidoptera;COI;;;;  
MN145008;Lepidoptera;COI;;;;  
MN145009;Lepidoptera;COI;;;;  
MN145024;Lepidoptera;COI;;;;  
MN145025;Lepidoptera;COI;;;;  
MN145032;Lepidoptera;COI;;;;  
MN145043;Lepidoptera;COI;;;;  
MN145051;Lepidoptera;COI;;;;  
MN145056;Lepidoptera;COI;;;;  
MN145078;Lepidoptera;COI;;;;  
MN145086;Lepidoptera;COI;;;;  
MN145088;Lepidoptera;COI;;;;  
MN145095;Lepidoptera;COI;;;;  
MN145108;Lepidoptera;COI;;;;  
MN145120;Lepidoptera;COI;;;;  
MN145120;Lepidoptera;COI;;;;  
MN145143;Lepidoptera;COI;;;;  
MN145149;Lepidoptera;COI;;;;  
MN145166;Lepidoptera;COI;;;;  
MN145167;Lepidoptera;COI;;;;  
MN145167;Lepidoptera;COI;;;;  
MN145169;Lepidoptera;COI;;;;  
MN145174;Lepidoptera;COI;;;;  
MN145193;Lepidoptera;COI;;;;  
MN145201;Lepidoptera;COI;;;;  
MN145249;Lepidoptera;COI;;;;  
MN145249;Lepidoptera;COI;;;;  
MN145252;Lepidoptera;COI;;;;  
MN145259;Lepidoptera;COI;;;;  
MN145264;Lepidoptera;COI;;;;  
MN145267;Lepidoptera;COI;;;;  
MN145267;Lepidoptera;COI;;;;  
MN145274;Lepidoptera;COI;;;;  
MN145281;Lepidoptera;COI;;;;  
MN145284;Lepidoptera;COI;;;;  
MN145285;Lepidoptera;COI;;;;  
MN145288;Lepidoptera;COI;;;;  
MN145310;Lepidoptera;COI;;;;  
MN145316;Lepidoptera;COI;;;;  
MN145327;Lepidoptera;COI;;;;  
MN145336;Lepidoptera;COI;;;;  
MN145378;Lepidoptera;COI;;;;  
MN145381;Lepidoptera;COI;;;;  
MN145388;Lepidoptera;COI;;;;  
MN145399;Lepidoptera;COI;;;;  
MN145409;Lepidoptera;COI;;;;  
MN145433;Lepidoptera;COI;;;;  
MN145435;Lepidoptera;COI;;;;  
MN145436;Lepidoptera;COI;;;;  
MN145436;Lepidoptera;COI;;;;  
MN145439;Lepidoptera;COI;;;;  
MN829476;Lepidoptera;COI;;;;  
MN829491;Lepidoptera;COI;;;;  
MN888486;Lepidoptera;COI;;;;  
MN888487;Lepidoptera;COI;;;;  
MN888488;Lepidoptera;COI;;;;  
MN888489;Lepidoptera;COI;;;;  
MN992986;Lepidoptera;COI;;;;  
MN993024;Lepidoptera;COI;;;;

MN993041;Lepidoptera;COI;;;;  
MN993054;Lepidoptera;COI;;;;  
MN993064;Lepidoptera;COI;;;;  
MT151352;Lepidoptera;COI;;;;  
MT151353;Lepidoptera;COI;;;;  
MT151368;Lepidoptera;COI;;;;  
MT210322;Lepidoptera;COI;;;;  
MT407192;Lepidoptera;COI;;;;  
MT407192;Lepidoptera;COI;;;;  
MT407194;Lepidoptera;COI;;;;  
MT407194;Lepidoptera;COI;;;;  
MT407198;Lepidoptera;COI;;;;  
MT407198;Lepidoptera;COI;;;;  
MT762427;Lepidoptera;COI;;;;  
MT762428;Lepidoptera;COI;;;;  
MT762429;Lepidoptera;COI;;;;  
MT762430;Lepidoptera;COI;;;;  
MT762431;Lepidoptera;COI;;;;  
MT762432;Lepidoptera;COI;;;;  
MT762433;Lepidoptera;COI;;;;  
MT762434;Lepidoptera;COI;;;;  
MT762435;Lepidoptera;COI;;;;  
MT762436;Lepidoptera;COI;;;;  
MT762437;Lepidoptera;COI;;;;  
MT762438;Lepidoptera;COI;;;;  
MT762441;Lepidoptera;COI;;;;  
MT762442;Lepidoptera;COI;;;;  
MT762444;Lepidoptera;COI;;;;  
MT762445;Lepidoptera;COI;;;;  
MT762446;Lepidoptera;COI;;;;  
MT762447;Lepidoptera;COI;;;;  
MT762448;Lepidoptera;COI;;;;  
MT762449;Lepidoptera;COI;;;;  
MT762450;Lepidoptera;COI;;;;  
MT762451;Lepidoptera;COI;;;;  
MT762452;Lepidoptera;COI;;;;  
MT762453;Lepidoptera;COI;;;;  
MT762454;Lepidoptera;COI;;;;  
MT762455;Lepidoptera;COI;;;;  
MT762456;Lepidoptera;COI;;;;  
MT762457;Lepidoptera;COI;;;;  
MT762458;Lepidoptera;COI;;;;  
MT762459;Lepidoptera;COI;;;;  
MT762460;Lepidoptera;COI;;;;  
MT762461;Lepidoptera;COI;;;;  
MT762462;Lepidoptera;COI;;;;  
MT762464;Lepidoptera;COI;;;;  
MT762465;Lepidoptera;COI;;;;  
MT762466;Lepidoptera;COI;;;;  
MT762467;Lepidoptera;COI;;;;  
MT762468;Lepidoptera;COI;;;;  
MT762469;Lepidoptera;COI;;;;  
MT762470;Lepidoptera;COI;;;;  
MT762471;Lepidoptera;COI;;;;  
MT762473;Lepidoptera;COI;;;;  
MT762474;Lepidoptera;COI;;;;  
MT762475;Lepidoptera;COI;;;;  
MT762476;Lepidoptera;COI;;;;  
MT762477;Lepidoptera;COI;;;;  
MT762478;Lepidoptera;COI;;;;  
MT762479;Lepidoptera;COI;;;;  
MT762480;Lepidoptera;COI;;;;  
MT762481;Lepidoptera;COI;;;;  
MT762482;Lepidoptera;COI;;;;  
MT762483;Lepidoptera;COI;;;;  
MT762484;Lepidoptera;COI;;;;  
MT762485;Lepidoptera;COI;;;;  
MT762486;Lepidoptera;COI;;;;  
MT762487;Lepidoptera;COI;;;;  
MT762488;Lepidoptera;COI;;;;  
MT762489;Lepidoptera;COI;;;;  
MT762490;Lepidoptera;COI;;;;  
MT762491;Lepidoptera;COI;;;;  
MT762492;Lepidoptera;COI;;;;  
MT762493;Lepidoptera;COI;;;;  
MT762494;Lepidoptera;COI;;;;  
MT762495;Lepidoptera;COI;;;;  
MT762496;Lepidoptera;COI;;;;

MT762497;Lepidoptera;COI;;;;  
MT762499;Lepidoptera;COI;;;;  
MT762500;Lepidoptera;COI;;;;  
MT762501;Lepidoptera;COI;;;;  
MT762502;Lepidoptera;COI;;;;  
MT762503;Lepidoptera;COI;;;;  
MT762505;Lepidoptera;COI;;;;  
MT762506;Lepidoptera;COI;;;;  
MT762507;Lepidoptera;COI;;;;  
MT762508;Lepidoptera;COI;;;;  
MT762509;Lepidoptera;COI;;;;  
MT762510;Lepidoptera;COI;;;;  
MT762512;Lepidoptera;COI;;;;  
MT762513;Lepidoptera;COI;;;;  
MT762515;Lepidoptera;COI;;;;  
MT762516;Lepidoptera;COI;;;;  
MT762517;Lepidoptera;COI;;;;  
MT762518;Lepidoptera;COI;;;;  
MT762519;Lepidoptera;COI;;;;  
MT762520;Lepidoptera;COI;;;;  
MT762521;Lepidoptera;COI;;;;  
MT762522;Lepidoptera;COI;;;;  
MT762523;Lepidoptera;COI;;;;  
MT762524;Lepidoptera;COI;;;;  
MT762525;Lepidoptera;COI;;;;  
MT762526;Lepidoptera;COI;;;;  
MT762527;Lepidoptera;COI;;;;  
MT762528;Lepidoptera;COI;;;;  
MT762529;Lepidoptera;COI;;;;  
MT762530;Lepidoptera;COI;;;;  
MT762531;Lepidoptera;COI;;;;  
MT762532;Lepidoptera;COI;;;;  
MT762533;Lepidoptera;COI;;;;  
MT762534;Lepidoptera;COI;;;;  
MT762535;Lepidoptera;COI;;;;  
MT762536;Lepidoptera;COI;;;;  
MT762537;Lepidoptera;COI;;;;  
MT762538;Lepidoptera;COI;;;;  
MT762539;Lepidoptera;COI;;;;  
MT762540;Lepidoptera;COI;;;;  
MT762541;Lepidoptera;COI;;;;  
MT762542;Lepidoptera;COI;;;;  
MT762543;Lepidoptera;COI;;;;  
MT762544;Lepidoptera;COI;;;;  
MT762545;Lepidoptera;COI;;;;  
MT762546;Lepidoptera;COI;;;;  
MT762547;Lepidoptera;COI;;;;  
MT762548;Lepidoptera;COI;;;;  
MT762549;Lepidoptera;COI;;;;  
MT762551;Lepidoptera;COI;;;;  
MT762552;Lepidoptera;COI;;;;  
MT762553;Lepidoptera;COI;;;;  
MT762556;Lepidoptera;COI;;;;  
MT762557;Lepidoptera;COI;;;;  
MT762558;Lepidoptera;COI;;;;  
MT762559;Lepidoptera;COI;;;;  
MT762560;Lepidoptera;COI;;;;  
MT762561;Lepidoptera;COI;;;;  
MT762562;Lepidoptera;COI;;;;  
MT762563;Lepidoptera;COI;;;;  
MT762564;Lepidoptera;COI;;;;  
MT762565;Lepidoptera;COI;;;;  
MT762566;Lepidoptera;COI;;;;  
MT762568;Lepidoptera;COI;;;;  
MT762569;Lepidoptera;COI;;;;  
MT762570;Lepidoptera;COI;;;;  
MT762571;Lepidoptera;COI;;;;  
MT762572;Lepidoptera;COI;;;;  
MT762573;Lepidoptera;COI;;;;  
MT762574;Lepidoptera;COI;;;;  
MT762575;Lepidoptera;COI;;;;  
MT762576;Lepidoptera;COI;;;;  
MT762577;Lepidoptera;COI;;;;  
MT762578;Lepidoptera;COI;;;;  
MT762579;Lepidoptera;COI;;;;  
MT762580;Lepidoptera;COI;;;;  
MT762581;Lepidoptera;COI;;;;  
MT762582;Lepidoptera;COI;;;;

MT762583;Lepidoptera;COI;;;;  
MT762584;Lepidoptera;COI;;;;  
MT762585;Lepidoptera;COI;;;;  
MT762587;Lepidoptera;COI;;;;  
MT762588;Lepidoptera;COI;;;;  
MT762589;Lepidoptera;COI;;;;  
MT762590;Lepidoptera;COI;;;;  
MT762591;Lepidoptera;COI;;;;  
MT762592;Lepidoptera;COI;;;;  
MT762593;Lepidoptera;COI;;;;  
MT762594;Lepidoptera;COI;;;;  
MT762595;Lepidoptera;COI;;;;  
MT762596;Lepidoptera;COI;;;;  
MT762597;Lepidoptera;COI;;;;  
MT762598;Lepidoptera;COI;;;;  
MT762600;Lepidoptera;COI;;;;  
MT762601;Lepidoptera;COI;;;;  
MT762602;Lepidoptera;COI;;;;  
MT878244;Lepidoptera;COI;;;;  
MT878245;Lepidoptera;COI;;;;  
MT878246;Lepidoptera;COI;;;;  
MT878247;Lepidoptera;COI;;;;  
MT878248;Lepidoptera;COI;;;;  
MT878249;Lepidoptera;COI;;;;  
MT878250;Lepidoptera;COI;;;;  
MT878251;Lepidoptera;COI;;;;  
MT878252;Lepidoptera;COI;;;;  
MT878253;Lepidoptera;COI;;;;  
MT878254;Lepidoptera;COI;;;;  
MT878255;Lepidoptera;COI;;;;  
MT878256;Lepidoptera;COI;;;;  
MT878257;Lepidoptera;COI;;;;  
MT878258;Lepidoptera;COI;;;;  
MT878259;Lepidoptera;COI;;;;  
MT878260;Lepidoptera;COI;;;;  
MT878261;Lepidoptera;COI;;;;  
MT878262;Lepidoptera;COI;;;;  
MT878263;Lepidoptera;COI;;;;  
MT878264;Lepidoptera;COI;;;;  
MT878265;Lepidoptera;COI;;;;  
MT878266;Lepidoptera;COI;;;;  
MT878267;Lepidoptera;COI;;;;  
MT878268;Lepidoptera;COI;;;;  
MT878269;Lepidoptera;COI;;;;  
MT878270;Lepidoptera;COI;;;;  
MT878271;Lepidoptera;COI;;;;  
MT878272;Lepidoptera;COI;;;;  
MT878277;Lepidoptera;COI;;;;  
MT878278;Lepidoptera;COI;;;;  
MT878279;Lepidoptera;COI;;;;  
MT878280;Lepidoptera;COI;;;;  
MT878281;Lepidoptera;COI;;;;  
MT878282;Lepidoptera;COI;;;;  
MT878283;Lepidoptera;COI;;;;  
MT878284;Lepidoptera;COI;;;;  
MT878285;Lepidoptera;COI;;;;  
MT878286;Lepidoptera;COI;;;;  
MT878287;Lepidoptera;COI;;;;  
MT878288;Lepidoptera;COI;;;;  
MT878289;Lepidoptera;COI;;;;  
MT878296;Lepidoptera;COI;;;;  
MT878297;Lepidoptera;COI;;;;  
MT878298;Lepidoptera;COI;;;;  
MT878299;Lepidoptera;COI;;;;  
MT878300;Lepidoptera;COI;;;;  
MT878301;Lepidoptera;COI;;;;  
MT878302;Lepidoptera;COI;;;;  
MT878303;Lepidoptera;COI;;;;  
MT878307;Lepidoptera;COI;;;;  
MT878308;Lepidoptera;COI;;;;  
MT878309;Lepidoptera;COI;;;;  
MT878314;Lepidoptera;COI;;;;  
MT878315;Lepidoptera;COI;;;;  
MT878316;Lepidoptera;COI;;;;  
MT878317;Lepidoptera;COI;;;;  
MT878318;Lepidoptera;COI;;;;  
MT878319;Lepidoptera;COI;;;;  
MT878320;Lepidoptera;COI;;;;

MT878321;Lepidoptera;COI;;;;  
MT878322;Lepidoptera;COI;;;;  
MT878329;Lepidoptera;COI;;;;  
MT878330;Lepidoptera;COI;;;;  
MT878331;Lepidoptera;COI;;;;  
MT878332;Lepidoptera;COI;;;;  
MT878338;Lepidoptera;COI;;;;  
MT878340;Lepidoptera;COI;;;;  
MT878341;Lepidoptera;COI;;;;  
MT878342;Lepidoptera;COI;;;;  
MT878344;Lepidoptera;COI;;;;  
MT878345;Lepidoptera;COI;;;;  
MT878350;Lepidoptera;COI;;;;  
MT878351;Lepidoptera;COI;;;;  
MT878352;Lepidoptera;COI;;;;  
MT878353;Lepidoptera;COI;;;;  
MT878354;Lepidoptera;COI;;;;  
MT878355;Lepidoptera;COI;;;;  
MT878356;Lepidoptera;COI;;;;  
MT878357;Lepidoptera;COI;;;;  
MT878358;Lepidoptera;COI;;;;  
MT878359;Lepidoptera;COI;;;;  
MT878360;Lepidoptera;COI;;;;  
MT916588;Lepidoptera;COI;;;;  
MT916589;Lepidoptera;COI;;;;  
MT916590;Lepidoptera;COI;;;;  
MT916591;Lepidoptera;COI;;;;  
MT916592;Lepidoptera;COI;;;;  
MT916593;Lepidoptera;COI;;;;  
MT916594;Lepidoptera;COI;;;;  
MT916595;Lepidoptera;COI;;;;  
MT916596;Lepidoptera;COI;;;;  
MT916597;Lepidoptera;COI;;;;  
MT916598;Lepidoptera;COI;;;;  
MT916599;Lepidoptera;COI;;;;  
MT916600;Lepidoptera;COI;;;;  
MT916601;Lepidoptera;COI;;;;  
MT916602;Lepidoptera;COI;;;;  
MT916604;Lepidoptera;COI;;;;  
MW018369;Lepidoptera;COI;;;;  
MW018370;Lepidoptera;COI;;;;  
MW018371;Lepidoptera;COI;;;;  
MW018372;Lepidoptera;COI;;;;  
MW018373;Lepidoptera;COI;;;;  
MW018374;Lepidoptera;COI;;;;  
MW018375;Lepidoptera;COI;;;;  
MW018376;Lepidoptera;COI;;;;  
MW018377;Lepidoptera;COI;;;;  
MW018378;Lepidoptera;COI;;;;  
MW018379;Lepidoptera;COI;;;;  
MW018380;Lepidoptera;COI;;;;  
MW018381;Lepidoptera;COI;;;;  
MW018382;Lepidoptera;COI;;;;  
MW018383;Lepidoptera;COI;;;;  
MW018384;Lepidoptera;COI;;;;  
MW018385;Lepidoptera;COI;;;;  
MW018386;Lepidoptera;COI;;;;  
MW018387;Lepidoptera;COI;;;;  
MW018388;Lepidoptera;COI;;;;  
MW018389;Lepidoptera;COI;;;;  
MW018390;Lepidoptera;COI;;;;  
MW018391;Lepidoptera;COI;;;;  
MW018392;Lepidoptera;COI;;;;  
MW018393;Lepidoptera;COI;;;;  
MW018394;Lepidoptera;COI;;;;  
MW018395;Lepidoptera;COI;;;;  
MW018396;Lepidoptera;COI;;;;  
MW018397;Lepidoptera;COI;;;;  
MW018398;Lepidoptera;COI;;;;  
MW018399;Lepidoptera;COI;;;;  
MW020759;Lepidoptera;COI;;;;  
MW022127;Lepidoptera;COI;;;;  
MW022128;Lepidoptera;COI;;;;  
MW022129;Lepidoptera;COI;;;;  
MW441623;Lepidoptera;COI;;;;  
MW441625;Lepidoptera;COI;;;;  
MW498982;Lepidoptera;COI;;;;  
MW498999;Lepidoptera;COI;;;;

MW498999;Lepidoptera;COI;;;;  
MW499015;Lepidoptera;COI;;;;  
MW499067;Lepidoptera;COI;;;;  
MW499070;Lepidoptera;COI;;;;  
MW499070;Lepidoptera;COI;;;;  
MW499071;Lepidoptera;COI;;;;  
MW499095;Lepidoptera;COI;;;;  
MW499106;Lepidoptera;COI;;;;  
MW499155;Lepidoptera;COI;;;;  
MW499155;Lepidoptera;COI;;;;  
MW499156;Lepidoptera;COI;;;;  
MW499174;Lepidoptera;COI;;;;  
MW499179;Lepidoptera;COI;;;;  
MW499182;Lepidoptera;COI;;;;  
MW499184;Lepidoptera;COI;;;;  
MW499186;Lepidoptera;COI;;;;  
MW499194;Lepidoptera;COI;;;;  
MW499195;Lepidoptera;COI;;;;  
MW499198;Lepidoptera;COI;;;;  
MW499215;Lepidoptera;COI;;;;  
MW499217;Lepidoptera;COI;;;;  
MW499222;Lepidoptera;COI;;;;  
MW499229;Lepidoptera;COI;;;;  
MW499233;Lepidoptera;COI;;;;  
MW499242;Lepidoptera;COI;;;;  
MW499242;Lepidoptera;COI;;;;  
MW499255;Lepidoptera;COI;;;;  
MW499257;Lepidoptera;COI;;;;  
MW499259;Lepidoptera;COI;;;;  
MW499261;Lepidoptera;COI;;;;  
MW499303;Lepidoptera;COI;;;;  
MW499337;Lepidoptera;COI;;;;  
MW499342;Lepidoptera;COI;;;;  
MW499343;Lepidoptera;COI;;;;  
MW499344;Lepidoptera;COI;;;;  
MW499367;Lepidoptera;COI;;;;  
MW499397;Lepidoptera;COI;;;;  
MW499400;Lepidoptera;COI;;;;  
MW499408;Lepidoptera;COI;;;;  
MW499410;Lepidoptera;COI;;;;  
MW499415;Lepidoptera;COI;;;;  
MW499443;Lepidoptera;COI;;;;  
MW499444;Lepidoptera;COI;;;;  
MW499444;Lepidoptera;COI;;;;  
MW499457;Lepidoptera;COI;;;;  
MW499500;Lepidoptera;COI;;;;  
MW499503;Lepidoptera;COI;;;;  
MW499503;Lepidoptera;COI;;;;  
MW499520;Lepidoptera;COI;;;;  
MW499541;Lepidoptera;COI;;;;  
MW499551;Lepidoptera;COI;;;;  
MW499571;Lepidoptera;COI;;;;  
MW499589;Lepidoptera;COI;;;;  
MW499597;Lepidoptera;COI;;;;  
MW499626;Lepidoptera;COI;;;;  
MW499631;Lepidoptera;COI;;;;  
MW499631;Lepidoptera;COI;;;;  
MW499639;Lepidoptera;COI;;;;  
MW499649;Lepidoptera;COI;;;;  
MW499651;Lepidoptera;COI;;;;  
MW499666;Lepidoptera;COI;;;;  
MW499668;Lepidoptera;COI;;;;  
MW499674;Lepidoptera;COI;;;;  
MW499685;Lepidoptera;COI;;;;  
MW499693;Lepidoptera;COI;;;;  
MW499699;Lepidoptera;COI;;;;  
MW499720;Lepidoptera;COI;;;;  
MW499736;Lepidoptera;COI;;;;  
MW499740;Lepidoptera;COI;;;;  
MW499760;Lepidoptera;COI;;;;  
MW499771;Lepidoptera;COI;;;;  
MW499774;Lepidoptera;COI;;;;  
MW499774;Lepidoptera;COI;;;;  
MW499784;Lepidoptera;COI;;;;  
MW499800;Lepidoptera;COI;;;;  
MW499810;Lepidoptera;COI;;;;  
MW499845;Lepidoptera;COI;;;;  
MW499850;Lepidoptera;COI;;;;

MW499866;Lepidoptera;COI;;;;  
MW499887;Lepidoptera;COI;;;;  
MW499889;Lepidoptera;COI;;;;  
MW499912;Lepidoptera;COI;;;;  
MW499916;Lepidoptera;COI;;;;  
MW499926;Lepidoptera;COI;;;;  
MW499929;Lepidoptera;COI;;;;  
MW499943;Lepidoptera;COI;;;;  
MW499978;Lepidoptera;COI;;;;  
MW499983;Lepidoptera;COI;;;;  
MW499987;Lepidoptera;COI;;;;  
MW499987;Lepidoptera;COI;;;;  
MW500021;Lepidoptera;COI;;;;  
MW500021;Lepidoptera;COI;;;;  
MW500027;Lepidoptera;COI;;;;  
MW500047;Lepidoptera;COI;;;;  
MW500052;Lepidoptera;COI;;;;  
MW500055;Lepidoptera;COI;;;;  
MW500065;Lepidoptera;COI;;;;  
MW500090;Lepidoptera;COI;;;;  
MW500090;Lepidoptera;COI;;;;  
MW500109;Lepidoptera;COI;;;;  
MW500113;Lepidoptera;COI;;;;  
MW500129;Lepidoptera;COI;;;;  
MW500140;Lepidoptera;COI;;;;  
MW500154;Lepidoptera;COI;;;;  
MW500166;Lepidoptera;COI;;;;  
MW500166;Lepidoptera;COI;;;;  
MW500185;Lepidoptera;COI;;;;  
MW500198;Lepidoptera;COI;;;;  
MW500199;Lepidoptera;COI;;;;  
MW500201;Lepidoptera;COI;;;;  
MW500206;Lepidoptera;COI;;;;  
MW500211;Lepidoptera;COI;;;;  
MW500212;Lepidoptera;COI;;;;  
MW500214;Lepidoptera;COI;;;;  
MW500220;Lepidoptera;COI;;;;  
MW500220;Lepidoptera;COI;;;;  
MW500233;Lepidoptera;COI;;;;  
MW500238;Lepidoptera;COI;;;;  
MW500282;Lepidoptera;COI;;;;  
MW500300;Lepidoptera;COI;;;;  
MW500300;Lepidoptera;COI;;;;  
MW500323;Lepidoptera;COI;;;;  
MW500323;Lepidoptera;COI;;;;  
MW500326;Lepidoptera;COI;;;;  
MW500332;Lepidoptera;COI;;;;  
MW500350;Lepidoptera;COI;;;;  
MW500357;Lepidoptera;COI;;;;  
MW500358;Lepidoptera;COI;;;;  
MW500361;Lepidoptera;COI;;;;  
MW500378;Lepidoptera;COI;;;;  
MW500381;Lepidoptera;COI;;;;  
MW500381;Lepidoptera;COI;;;;  
MW500383;Lepidoptera;COI;;;;  
MW500394;Lepidoptera;COI;;;;  
MW500400;Lepidoptera;COI;;;;  
MW500414;Lepidoptera;COI;;;;  
MW500423;Lepidoptera;COI;;;;  
MW500438;Lepidoptera;COI;;;;  
MW500471;Lepidoptera;COI;;;;  
MW500481;Lepidoptera;COI;;;;  
MW500486;Lepidoptera;COI;;;;  
MW500494;Lepidoptera;COI;;;;  
MW500497;Lepidoptera;COI;;;;  
MW500516;Lepidoptera;COI;;;;  
MW500528;Lepidoptera;COI;;;;  
MW500531;Lepidoptera;COI;;;;  
MW500544;Lepidoptera;COI;;;;  
MW500556;Lepidoptera;COI;;;;  
MW500569;Lepidoptera;COI;;;;  
MW500575;Lepidoptera;COI;;;;  
MW500580;Lepidoptera;COI;;;;  
MW500582;Lepidoptera;COI;;;;  
MW500587;Lepidoptera;COI;;;;  
MW500587;Lepidoptera;COI;;;;  
MW500594;Lepidoptera;COI;;;;  
MW500595;Lepidoptera;COI;;;;



MW500613;Lepidoptera;COI;;;;  
MW500617;Lepidoptera;COI;;;;  
MW500623;Lepidoptera;COI;;;;  
MW500672;Lepidoptera;COI;;;;  
MW500694;Lepidoptera;COI;;;;  
MW500694;Lepidoptera;COI;;;;  
MW500702;Lepidoptera;COI;;;;  
MW500702;Lepidoptera;COI;;;;  
MW500719;Lepidoptera;COI;;;;  
MW500728;Lepidoptera;COI;;;;  
MW500738;Lepidoptera;COI;;;;  
MW500748;Lepidoptera;COI;;;;  
MW500748;Lepidoptera;COI;;;;  
MW500753;Lepidoptera;COI;;;;  
MW500766;Lepidoptera;COI;;;;  
MW500767;Lepidoptera;COI;;;;  
MW500773;Lepidoptera;COI;;;;  
MW500783;Lepidoptera;COI;;;;  
MW500783;Lepidoptera;COI;;;;  
MW500801;Lepidoptera;COI;;;;  
MW500807;Lepidoptera;COI;;;;  
MW500811;Lepidoptera;COI;;;;  
MW500814;Lepidoptera;COI;;;;  
MW500818;Lepidoptera;COI;;;;  
MW500827;Lepidoptera;COI;;;;  
MW500847;Lepidoptera;COI;;;;  
MW500851;Lepidoptera;COI;;;;  
MW500852;Lepidoptera;COI;;;;  
MW500860;Lepidoptera;COI;;;;  
MW500901;Lepidoptera;COI;;;;  
MW500939;Lepidoptera;COI;;;;  
MW500943;Lepidoptera;COI;;;;  
MW500948;Lepidoptera;COI;;;;  
MW500953;Lepidoptera;COI;;;;  
MW500957;Lepidoptera;COI;;;;  
MW500965;Lepidoptera;COI;;;;  
MW500984;Lepidoptera;COI;;;;  
MW500990;Lepidoptera;COI;;;;  
MW500994;Lepidoptera;COI;;;;  
MW501015;Lepidoptera;COI;;;;  
MW501015;Lepidoptera;COI;;;;  
MW501071;Lepidoptera;COI;;;;  
MW501094;Lepidoptera;COI;;;;  
MW501126;Lepidoptera;COI;;;;  
MW501126;Lepidoptera;COI;;;;  
MW501134;Lepidoptera;COI;;;;  
MW501138;Lepidoptera;COI;;;;  
MW501145;Lepidoptera;COI;;;;  
MW501149;Lepidoptera;COI;;;;  
MW501194;Lepidoptera;COI;;;;  
MW501228;Lepidoptera;COI;;;;  
MW501230;Lepidoptera;COI;;;;  
MW501233;Lepidoptera;COI;;;;  
MW501237;Lepidoptera;COI;;;;  
MW501243;Lepidoptera;COI;;;;  
MW501248;Lepidoptera;COI;;;;  
MW501277;Lepidoptera;COI;;;;  
MW501279;Lepidoptera;COI;;;;  
MW501280;Lepidoptera;COI;;;;  
MW501312;Lepidoptera;COI;;;;  
MW501320;Lepidoptera;COI;;;;  
MW501326;Lepidoptera;COI;;;;  
MW501330;Lepidoptera;COI;;;;  
MW501338;Lepidoptera;COI;;;;  
MW501357;Lepidoptera;COI;;;;  
MW501357;Lepidoptera;COI;;;;  
MW501390;Lepidoptera;COI;;;;  
MW501390;Lepidoptera;COI;;;;  
MW501391;Lepidoptera;COI;;;;  
MW501393;Lepidoptera;COI;;;;  
MW501410;Lepidoptera;COI;;;;  
MW501413;Lepidoptera;COI;;;;  
MW501419;Lepidoptera;COI;;;;  
MW501430;Lepidoptera;COI;;;;  
MW501434;Lepidoptera;COI;;;;  
MW501435;Lepidoptera;COI;;;;  
MW501456;Lepidoptera;COI;;;;  
MW501456;Lepidoptera;COI;;;;

MW501457;Lepidoptera;COI;;;;  
MW501492;Lepidoptera;COI;;;;  
MW501506;Lepidoptera;COI;;;;  
MW501532;Lepidoptera;COI;;;;  
MW501559;Lepidoptera;COI;;;;  
MW501562;Lepidoptera;COI;;;;  
MW501604;Lepidoptera;COI;;;;  
MW501606;Lepidoptera;COI;;;;  
MW501633;Lepidoptera;COI;;;;  
MW501642;Lepidoptera;COI;;;;  
MW501645;Lepidoptera;COI;;;;  
MW501655;Lepidoptera;COI;;;;  
MW501658;Lepidoptera;COI;;;;  
MW501665;Lepidoptera;COI;;;;  
MW501688;Lepidoptera;COI;;;;  
MW501688;Lepidoptera;COI;;;;  
MW501690;Lepidoptera;COI;;;;  
MW501695;Lepidoptera;COI;;;;  
MW501717;Lepidoptera;COI;;;;  
MW501718;Lepidoptera;COI;;;;  
MW501730;Lepidoptera;COI;;;;  
MW501730;Lepidoptera;COI;;;;  
MW501757;Lepidoptera;COI;;;;  
MW501757;Lepidoptera;COI;;;;  
MW501770;Lepidoptera;COI;;;;  
MW501792;Lepidoptera;COI;;;;  
MW501794;Lepidoptera;COI;;;;  
MW501803;Lepidoptera;COI;;;;  
MW501807;Lepidoptera;COI;;;;  
MW501810;Lepidoptera;COI;;;;  
MW501821;Lepidoptera;COI;;;;  
MW501821;Lepidoptera;COI;;;;  
MW501868;Lepidoptera;COI;;;;  
MW501872;Lepidoptera;COI;;;;  
MW501875;Lepidoptera;COI;;;;  
MW501910;Lepidoptera;COI;;;;  
MW501946;Lepidoptera;COI;;;;  
MW501947;Lepidoptera;COI;;;;  
MW501949;Lepidoptera;COI;;;;  
MW501953;Lepidoptera;COI;;;;  
MW501961;Lepidoptera;COI;;;;  
MW501961;Lepidoptera;COI;;;;  
MW501980;Lepidoptera;COI;;;;  
MW501987;Lepidoptera;COI;;;;  
MW501994;Lepidoptera;COI;;;;  
MW501997;Lepidoptera;COI;;;;  
MW502000;Lepidoptera;COI;;;;  
MW502000;Lepidoptera;COI;;;;  
MW502002;Lepidoptera;COI;;;;  
MW502013;Lepidoptera;COI;;;;  
MW502013;Lepidoptera;COI;;;;  
MW502014;Lepidoptera;COI;;;;  
MW502014;Lepidoptera;COI;;;;  
MW502022;Lepidoptera;COI;;;;  
MW502028;Lepidoptera;COI;;;;  
MW502040;Lepidoptera;COI;;;;  
MW502042;Lepidoptera;COI;;;;  
MW502081;Lepidoptera;COI;;;;  
MW502089;Lepidoptera;COI;;;;  
MW502117;Lepidoptera;COI;;;;  
MW502124;Lepidoptera;COI;;;;  
MW502131;Lepidoptera;COI;;;;  
MW502163;Lepidoptera;COI;;;;  
MW502163;Lepidoptera;COI;;;;  
MW502177;Lepidoptera;COI;;;;  
MW502184;Lepidoptera;COI;;;;  
MW502202;Lepidoptera;COI;;;;  
MW502208;Lepidoptera;COI;;;;  
MW502211;Lepidoptera;COI;;;;  
MW502211;Lepidoptera;COI;;;;  
MW502219;Lepidoptera;COI;;;;  
MW502223;Lepidoptera;COI;;;;  
MW502228;Lepidoptera;COI;;;;  
MW502241;Lepidoptera;COI;;;;  
MW502251;Lepidoptera;COI;;;;  
MW502251;Lepidoptera;COI;;;;  
MW502257;Lepidoptera;COI;;;;  
MW502277;Lepidoptera;COI;;;;

MW502281;Lepidoptera;COI;;;;  
MW502282;Lepidoptera;COI;;;;  
MW502294;Lepidoptera;COI;;;;  
MW502299;Lepidoptera;COI;;;;  
MW502304;Lepidoptera;COI;;;;  
MW502306;Lepidoptera;COI;;;;  
MW502308;Lepidoptera;COI;;;;  
MW502317;Lepidoptera;COI;;;;  
MW502322;Lepidoptera;COI;;;;  
MW502328;Lepidoptera;COI;;;;  
MW502352;Lepidoptera;COI;;;;  
MW502352;Lepidoptera;COI;;;;  
MW502355;Lepidoptera;COI;;;;  
MW502358;Lepidoptera;COI;;;;  
MW502362;Lepidoptera;COI;;;;  
MW502365;Lepidoptera;COI;;;;  
MW502365;Lepidoptera;COI;;;;  
MW502376;Lepidoptera;COI;;;;  
MW502387;Lepidoptera;COI;;;;  
MW502405;Lepidoptera;COI;;;;  
MW502441;Lepidoptera;COI;;;;  
MW502443;Lepidoptera;COI;;;;  
MW502495;Lepidoptera;COI;;;;  
MW502495;Lepidoptera;COI;;;;  
MW502517;Lepidoptera;COI;;;;  
MW502527;Lepidoptera;COI;;;;  
MW502539;Lepidoptera;COI;;;;  
MW502541;Lepidoptera;COI;;;;  
MW502541;Lepidoptera;COI;;;;  
MW502545;Lepidoptera;COI;;;;  
MW502545;Lepidoptera;COI;;;;  
MW502546;Lepidoptera;COI;;;;  
MW502560;Lepidoptera;COI;;;;  
MW502560;Lepidoptera;COI;;;;  
MW502567;Lepidoptera;COI;;;;  
MW502577;Lepidoptera;COI;;;;  
MW502585;Lepidoptera;COI;;;;  
MW502601;Lepidoptera;COI;;;;  
MW502608;Lepidoptera;COI;;;;  
MW502612;Lepidoptera;COI;;;;  
MW502614;Lepidoptera;COI;;;;  
MW502628;Lepidoptera;COI;;;;  
MW502636;Lepidoptera;COI;;;;  
MW502640;Lepidoptera;COI;;;;  
MW502640;Lepidoptera;COI;;;;  
MW502654;Lepidoptera;COI;;;;  
MW502659;Lepidoptera;COI;;;;  
MW502661;Lepidoptera;COI;;;;  
MW502664;Lepidoptera;COI;;;;  
MW502702;Lepidoptera;COI;;;;  
MW502713;Lepidoptera;COI;;;;  
MW502717;Lepidoptera;COI;;;;  
MW502718;Lepidoptera;COI;;;;  
MW502722;Lepidoptera;COI;;;;  
MW502728;Lepidoptera;COI;;;;  
MW502734;Lepidoptera;COI;;;;  
MW502735;Lepidoptera;COI;;;;  
MW502759;Lepidoptera;COI;;;;  
MW502776;Lepidoptera;COI;;;;  
MW502785;Lepidoptera;COI;;;;  
MW502789;Lepidoptera;COI;;;;  
MW502805;Lepidoptera;COI;;;;  
MW502807;Lepidoptera;COI;;;;  
MW502818;Lepidoptera;COI;;;;  
MW502818;Lepidoptera;COI;;;;  
MW502823;Lepidoptera;COI;;;;  
MW502829;Lepidoptera;COI;;;;  
MW502842;Lepidoptera;COI;;;;  
MW502854;Lepidoptera;COI;;;;  
MW502857;Lepidoptera;COI;;;;  
MW502868;Lepidoptera;COI;;;;  
MW502882;Lepidoptera;COI;;;;  
MW502882;Lepidoptera;COI;;;;  
MW502914;Lepidoptera;COI;;;;  
MW502937;Lepidoptera;COI;;;;  
MW502957;Lepidoptera;COI;;;;  
MW502979;Lepidoptera;COI;;;;  
MW502999;Lepidoptera;COI;;;;

MW503004;Lepidoptera;COI;;;;  
MW503007;Lepidoptera;COI;;;;  
MW503010;Lepidoptera;COI;;;;  
MW503021;Lepidoptera;COI;;;;  
MW503043;Lepidoptera;COI;;;;  
MW503049;Lepidoptera;COI;;;;  
MW503062;Lepidoptera;COI;;;;  
MW503066;Lepidoptera;COI;;;;  
MW503066;Lepidoptera;COI;;;;  
MW503076;Lepidoptera;COI;;;;  
MW503081;Lepidoptera;COI;;;;  
MW503082;Lepidoptera;COI;;;;  
MW503089;Lepidoptera;COI;;;;  
MW503091;Lepidoptera;COI;;;;  
MW503092;Lepidoptera;COI;;;;  
MW503102;Lepidoptera;COI;;;;  
MW503107;Lepidoptera;COI;;;;  
MW503107;Lepidoptera;COI;;;;  
MW503112;Lepidoptera;COI;;;;  
MW503120;Lepidoptera;COI;;;;  
MW503144;Lepidoptera;COI;;;;  
MW503154;Lepidoptera;COI;;;;  
MW503170;Lepidoptera;COI;;;;  
MW503170;Lepidoptera;COI;;;;  
MW503179;Lepidoptera;COI;;;;  
MW503189;Lepidoptera;COI;;;;  
MW503195;Lepidoptera;COI;;;;  
MW503201;Lepidoptera;COI;;;;  
MW503201;Lepidoptera;COI;;;;  
MW503202;Lepidoptera;COI;;;;  
MW503202;Lepidoptera;COI;;;;  
MW503228;Lepidoptera;COI;;;;  
MW503228;Lepidoptera;COI;;;;  
MW503237;Lepidoptera;COI;;;;  
MW503259;Lepidoptera;COI;;;;  
MW503288;Lepidoptera;COI;;;;  
MW503292;Lepidoptera;COI;;;;  
MW503303;Lepidoptera;COI;;;;  
MW503309;Lepidoptera;COI;;;;  
MW503322;Lepidoptera;COI;;;;  
MW503333;Lepidoptera;COI;;;;  
MW503334;Lepidoptera;COI;;;;  
MW503338;Lepidoptera;COI;;;;  
MW503358;Lepidoptera;COI;;;;  
MW503358;Lepidoptera;COI;;;;  
MW503360;Lepidoptera;COI;;;;  
MW503378;Lepidoptera;COI;;;;  
MW503408;Lepidoptera;COI;;;;  
MW503411;Lepidoptera;COI;;;;  
MW503411;Lepidoptera;COI;;;;  
MW503420;Lepidoptera;COI;;;;  
MW503422;Lepidoptera;COI;;;;  
MW503430;Lepidoptera;COI;;;;  
MW503437;Lepidoptera;COI;;;;  
MW503438;Lepidoptera;COI;;;;  
MW503457;Lepidoptera;COI;;;;  
MW503457;Lepidoptera;COI;;;;  
MW503460;Lepidoptera;COI;;;;  
MW503460;Lepidoptera;COI;;;;  
MW503469;Lepidoptera;COI;;;;  
MW503473;Lepidoptera;COI;;;;  
MW503485;Lepidoptera;COI;;;;  
MW503497;Lepidoptera;COI;;;;  
MW503502;Lepidoptera;COI;;;;  
MW503536;Lepidoptera;COI;;;;  
MW503540;Lepidoptera;COI;;;;  
MW503541;Lepidoptera;COI;;;;  
MW503549;Lepidoptera;COI;;;;  
MW503567;Lepidoptera;COI;;;;  
MW503567;Lepidoptera;COI;;;;  
MW503572;Lepidoptera;COI;;;;  
MW503576;Lepidoptera;COI;;;;  
MW503576;Lepidoptera;COI;;;;  
MW503582;Lepidoptera;COI;;;;  
MW503600;Lepidoptera;COI;;;;  
MW503610;Lepidoptera;COI;;;;  
MW503613;Lepidoptera;COI;;;;  
MW503613;Lepidoptera;COI;;;;

MW503617;Lepidoptera;COI;;;;  
MW503619;Lepidoptera;COI;;;;  
MW503619;Lepidoptera;COI;;;;  
MW503658;Lepidoptera;COI;;;;  
MW503689;Lepidoptera;COI;;;;  
MW653337;Lepidoptera;COI;;;;  
MW661286;Lepidoptera;COI;;;;  
MW661287;Lepidoptera;COI;;;;  
MW661291;Lepidoptera;COI;;;;  
MW661292;Lepidoptera;COI;;;;  
MW661299;Lepidoptera;COI;;;;  
MW661306;Lepidoptera;COI;;;;  
MW661320;Lepidoptera;COI;;;;  
MW661321;Lepidoptera;COI;;;;  
MW661323;Lepidoptera;COI;;;;  
MW661324;Lepidoptera;COI;;;;  
MW661325;Lepidoptera;COI;;;;  
MW661326;Lepidoptera;COI;;;;  
MW857550;Lepidoptera;COI;;;;  
MW861644;Lepidoptera;COI;;;;  
MW861646;Lepidoptera;COI;;;;  
MW861660;Lepidoptera;COI;;;;  
MW861661;Lepidoptera;COI;;;;  
MW861665;Lepidoptera;COI;;;;  
MW861666;Lepidoptera;COI;;;;  
MW861667;Lepidoptera;COI;;;;  
MW861670;Lepidoptera;COI;;;;  
MW861671;Lepidoptera;COI;;;;  
MW861672;Lepidoptera;COI;;;;  
MW861673;Lepidoptera;COI;;;;  
MZ021520;Lepidoptera;COI;;;;  
MZ026164;Lepidoptera;COI;;;;  
MZ026165;Lepidoptera;COI;;;;  
MZ026166;Lepidoptera;COI;;;;  
MZ026167;Lepidoptera;COI;;;;  
MZ026168;Lepidoptera;COI;;;;  
MZ026170;Lepidoptera;COI;;;;  
MZ026171;Lepidoptera;COI;;;;  
MZ026174;Lepidoptera;COI;;;;  
MZ026175;Lepidoptera;COI;;;;  
MZ026191;Lepidoptera;COI;;;;  
MZ026194;Lepidoptera;COI;;;;  
MZ026195;Lepidoptera;COI;;;;  
MZ026232;Lepidoptera;COI;;;;  
MZ026233;Lepidoptera;COI;;;;  
MZ026234;Lepidoptera;COI;;;;  
MZ026235;Lepidoptera;COI;;;;  
MZ026237;Lepidoptera;COI;;;;  
MZ026238;Lepidoptera;COI;;;;  
MZ026239;Lepidoptera;COI;;;;  
MZ026240;Lepidoptera;COI;;;;  
MZ026241;Lepidoptera;COI;;;;  
MZ115048;Lepidoptera;COI;;;;  
MZ128126;Lepidoptera;COI;;;;  
MZ128127;Lepidoptera;COI;;;;  
MZ128128;Lepidoptera;COI;;;;  
MZ626727;Lepidoptera;COI;;;;  
OK037119;Lepidoptera;COI;;;;  
OK037120;Lepidoptera;COI;;;;  
OK037121;Lepidoptera;COI;;;;  
OK037122;Lepidoptera;COI;;;;  
OK037123;Lepidoptera;COI;;;;  
OK037124;Lepidoptera;COI;;;;  
OK037125;Lepidoptera;COI;;;;  
OK037126;Lepidoptera;COI;;;;  
OK037127;Lepidoptera;COI;;;;  
OK037128;Lepidoptera;COI;;;;  
OK037129;Lepidoptera;COI;;;;  
OK037130;Lepidoptera;COI;;;;  
OK037131;Lepidoptera;COI;;;;  
OK037132;Lepidoptera;COI;;;;  
OK037133;Lepidoptera;COI;;;;  
OK037134;Lepidoptera;COI;;;;  
OK037135;Lepidoptera;COI;;;;  
OK037136;Lepidoptera;COI;;;;  
OK037137;Lepidoptera;COI;;;;  
OK037138;Lepidoptera;COI;;;;  
OK037139;Lepidoptera;COI;;;;

OK037140;Lepidoptera;COI;;;;  
ON436062;Lepidoptera;COI;;;;  
ON436530;Lepidoptera;COI;;;;  
ON437242;Lepidoptera;COI;;;;  
ON437244;Lepidoptera;COI;;;;  
OP644313;Lepidoptera;COI;;;;  
OP715732;Lepidoptera;COI;;;;  
OU723912;Lepidoptera;COI;;;;  
OU723913;Lepidoptera;COI;;;;  
OU723914;Lepidoptera;COI;;;;  
OU723915;Lepidoptera;COI;;;;  
OU723916;Lepidoptera;COI;;;;  
OU723917;Lepidoptera;COI;;;;  
OU723918;Lepidoptera;COI;;;;  
OU723919;Lepidoptera;COI;;;;  
OU723920;Lepidoptera;COI;;;;  
OU723921;Lepidoptera;COI;;;;  
OU724030;Lepidoptera;COI;;;;  
OU724031;Lepidoptera;COI;;;;  
OU724032;Lepidoptera;COI;;;;  
OU724033;Lepidoptera;COI;;;;  
OU724034;Lepidoptera;COI;;;;  
AB709130;Odonata;COI;;;;  
AB709133;Odonata;COI;;;;  
AB709136;Odonata;COI;;;;  
AB709138;Odonata;COI;;;;  
AB709142;Odonata;COI;;;;  
AF228584;Odonata;COI;;;;  
AF228591;Odonata;COI;;;;  
AF228592;Odonata;COI;;;;  
AM180646;Odonata;COI;;;;  
AY300810;Odonata;COI;;;;  
AY300811;Odonata;COI;;;;  
AY300812;Odonata;COI;;;;  
AY300813;Odonata;COI;;;;  
AY300815;Odonata;COI;;;;  
AY300816;Odonata;COI;;;;  
GU682174;Odonata;COI;;;;  
GU682176;Odonata;COI;;;;  
HM901859;Odonata;COI;;;;  
HM901865;Odonata;COI;;;;  
HM901887;Odonata;COI;;;;  
HM901888;Odonata;COI;;;;  
HM901892;Odonata;COI;;;;  
HQ830299;Odonata;COI;;;;  
HQ830300;Odonata;COI;;;;  
HQ830301;Odonata;COI;;;;  
HQ830302;Odonata;COI;;;;  
HQ830303;Odonata;COI;;;;  
HQ830304;Odonata;COI;;;;  
HQ830305;Odonata;COI;;;;  
HQ830306;Odonata;COI;;;;  
HQ830307;Odonata;COI;;;;  
HQ830308;Odonata;COI;;;;  
HQ830309;Odonata;COI;;;;  
HQ830310;Odonata;COI;;;;  
HQ830311;Odonata;COI;;;;  
HQ830312;Odonata;COI;;;;  
HQ830313;Odonata;COI;;;;  
HQ830314;Odonata;COI;;;;  
HQ830315;Odonata;COI;;;;  
HQ830316;Odonata;COI;;;;  
HQ830317;Odonata;COI;;;;  
HQ830318;Odonata;COI;;;;  
HQ830319;Odonata;COI;;;;  
HQ830320;Odonata;COI;;;;  
HQ830321;Odonata;COI;;;;  
KF369349;Odonata;COI;;;;  
KF369350;Odonata;COI;;;;  
KF855908;Odonata;COI;;;;  
KU695838;Odonata;COI;;;;  
KU695840;Odonata;COI;;;;  
KU695841;Odonata;COI;;;;  
KU695842;Odonata;COI;;;;  
KU695843;Odonata;COI;;;;  
KU695844;Odonata;COI;;;;  
KU695845;Odonata;COI;;;;  
KY275437;Odonata;COI;;;;

KY275438;Odonata;COI;;;;  
KY275439;Odonata;COI;;;;  
KY275440;Odonata;COI;;;;  
KY275441;Odonata;COI;;;;  
KY275442;Odonata;COI;;;;  
KY275443;Odonata;COI;;;;  
KY275444;Odonata;COI;;;;  
KY275445;Odonata;COI;;;;  
KY275446;Odonata;COI;;;;  
KY275447;Odonata;COI;;;;  
KY275448;Odonata;COI;;;;  
KY275449;Odonata;COI;;;;  
KY807688;Odonata;COI;;;;  
KY807689;Odonata;COI;;;;  
KY807690;Odonata;COI;;;;  
KY807691;Odonata;COI;;;;  
KY807692;Odonata;COI;;;;  
KY807693;Odonata;COI;;;;  
KY807694;Odonata;COI;;;;  
KY807695;Odonata;COI;;;;  
KY807696;Odonata;COI;;;;  
KY807697;Odonata;COI;;;;  
KY807698;Odonata;COI;;;;  
KY807699;Odonata;COI;;;;  
KY807700;Odonata;COI;;;;  
KY807701;Odonata;COI;;;;  
KY807702;Odonata;COI;;;;  
KY807703;Odonata;COI;;;;  
KY807704;Odonata;COI;;;;  
KY807705;Odonata;COI;;;;  
KY807706;Odonata;COI;;;;  
KY807707;Odonata;COI;;;;  
KY807708;Odonata;COI;;;;  
KY807709;Odonata;COI;;;;  
KY807710;Odonata;COI;;;;  
KY847569;Odonata;COI;;;;  
KY847570;Odonata;COI;;;;  
KY847574;Odonata;COI;;;;  
KY847575;Odonata;COI;;;;  
KY847576;Odonata;COI;;;;  
KY847577;Odonata;COI;;;;  
LC365774;Odonata;COI;;;;  
LC365775;Odonata;COI;;;;  
LC365776;Odonata;COI;;;;  
LC365777;Odonata;COI;;;;  
LC365778;Odonata;COI;;;;  
LC365779;Odonata;COI;;;;  
LC365780;Odonata;COI;;;;  
LC365781;Odonata;COI;;;;  
LC365782;Odonata;COI;;;;  
LC365783;Odonata;COI;;;;  
LC366768;Odonata;COI;;;;  
LC366769;Odonata;COI;;;;  
LC366842;Odonata;COI;;;;  
MH449990;Odonata;COI;;;;  
MN701490;Odonata;COI;;;;  
MN701509;Odonata;COI;;;;  
MN701511;Odonata;COI;;;;  
MN701527;Odonata;COI;;;;  
MN701529;Odonata;COI;;;;  
MN701538;Odonata;COI;;;;  
MN701544;Odonata;COI;;;;  
MN701553;Odonata;COI;;;;  
MN709115;Odonata;COI;;;;  
MN709116;Odonata;COI;;;;  
MN709117;Odonata;COI;;;;  
MN709118;Odonata;COI;;;;  
MN709119;Odonata;COI;;;;  
MN731356;Odonata;COI;;;;  
MN731357;Odonata;COI;;;;  
MN731358;Odonata;COI;;;;  
MN731359;Odonata;COI;;;;  
MN735553;Odonata;COI;;;;  
MN735554;Odonata;COI;;;;  
MT298340;Odonata;COI;;;;  
MT298341;Odonata;COI;;;;  
MT298342;Odonata;COI;;;;  
MT298343;Odonata;COI;;;;

MT298344;Odonata;COI;;;;  
MT298345;Odonata;COI;;;;  
MT298346;Odonata;COI;;;;  
MT298347;Odonata;COI;;;;  
MT298348;Odonata;COI;;;;  
MT298349;Odonata;COI;;;;  
MT298350;Odonata;COI;;;;  
MT298351;Odonata;COI;;;;  
MT298352;Odonata;COI;;;;  
MT298353;Odonata;COI;;;;  
MT298354;Odonata;COI;;;;  
MT298355;Odonata;COI;;;;  
MT298356;Odonata;COI;;;;  
MT298357;Odonata;COI;;;;  
MT298360;Odonata;COI;;;;  
MT298361;Odonata;COI;;;;  
MT298362;Odonata;COI;;;;  
MT298363;Odonata;COI;;;;  
MT298364;Odonata;COI;;;;  
MT298365;Odonata;COI;;;;  
MT298366;Odonata;COI;;;;  
MT298367;Odonata;COI;;;;  
MT298368;Odonata;COI;;;;  
MT298369;Odonata;COI;;;;  
MT298370;Odonata;COI;;;;  
MT298371;Odonata;COI;;;;  
MT298372;Odonata;COI;;;;  
MT298373;Odonata;COI;;;;  
MT298374;Odonata;COI;;;;  
MT298375;Odonata;COI;;;;  
MT298376;Odonata;COI;;;;  
MT298377;Odonata;COI;;;;  
MT298378;Odonata;COI;;;;  
MT415343;Odonata;COI;;;;  
MW208371;Odonata;COI;;;;  
MW208386;Odonata;COI;;;;  
MW208387;Odonata;COI;;;;  
MW208388;Odonata;COI;;;;  
MW208389;Odonata;COI;;;;  
MW208390;Odonata;COI;;;;  
MW208392;Odonata;COI;;;;  
MW377804;Odonata;COI;;;;  
MW377805;Odonata;COI;;;;  
MW377806;Odonata;COI;;;;  
MW377807;Odonata;COI;;;;  
MW377808;Odonata;COI;;;;  
MW377809;Odonata;COI;;;;  
MW377810;Odonata;COI;;;;  
MW377811;Odonata;COI;;;;  
MW377812;Odonata;COI;;;;  
MW377813;Odonata;COI;;;;  
MW377814;Odonata;COI;;;;  
MW377815;Odonata;COI;;;;  
MW377816;Odonata;COI;;;;  
MW377817;Odonata;COI;;;;  
MW377818;Odonata;COI;;;;  
MW377819;Odonata;COI;;;;  
MW377820;Odonata;COI;;;;  
MW377821;Odonata;COI;;;;  
MW377822;Odonata;COI;;;;  
MW377823;Odonata;COI;;;;  
MW377824;Odonata;COI;;;;  
MW377825;Odonata;COI;;;;  
MW377826;Odonata;COI;;;;  
MW377827;Odonata;COI;;;;  
MW377828;Odonata;COI;;;;  
MW377829;Odonata;COI;;;;  
MW377830;Odonata;COI;;;;  
MW377831;Odonata;COI;;;;  
MW377832;Odonata;COI;;;;  
MW377833;Odonata;COI;;;;  
MW377834;Odonata;COI;;;;  
MW377835;Odonata;COI;;;;  
MW377836;Odonata;COI;;;;  
MW377837;Odonata;COI;;;;  
MW377839;Odonata;COI;;;;  
MW377840;Odonata;COI;;;;  
MW377841;Odonata;COI;;;;



MW377842;Odonata;COI;;;;  
MW377843;Odonata;COI;;;;  
MW377844;Odonata;COI;;;;  
MW377845;Odonata;COI;;;;  
MW377846;Odonata;COI;;;;  
MW377847;Odonata;COI;;;;  
MW377848;Odonata;COI;;;;  
MW377849;Odonata;COI;;;;  
MW377850;Odonata;COI;;;;  
MW377851;Odonata;COI;;;;  
MW377852;Odonata;COI;;;;  
MW377853;Odonata;COI;;;;  
MW377854;Odonata;COI;;;;  
MW377855;Odonata;COI;;;;  
MW377859;Odonata;COI;;;;  
MW377860;Odonata;COI;;;;  
MW377861;Odonata;COI;;;;  
MW377862;Odonata;COI;;;;  
MW377863;Odonata;COI;;;;  
MW377864;Odonata;COI;;;;  
MW377865;Odonata;COI;;;;  
MW377866;Odonata;COI;;;;  
MW377867;Odonata;COI;;;;  
MW377868;Odonata;COI;;;;  
MW377869;Odonata;COI;;;;  
MW377870;Odonata;COI;;;;  
MW377871;Odonata;COI;;;;  
MW377872;Odonata;COI;;;;  
MW377873;Odonata;COI;;;;  
MW377874;Odonata;COI;;;;  
MW377875;Odonata;COI;;;;  
MW377876;Odonata;COI;;;;  
MW377877;Odonata;COI;;;;  
MW377878;Odonata;COI;;;;  
MW377879;Odonata;COI;;;;  
MW377880;Odonata;COI;;;;  
MW377881;Odonata;COI;;;;  
MW377882;Odonata;COI;;;;  
MW377883;Odonata;COI;;;;  
MW377884;Odonata;COI;;;;  
MW377885;Odonata;COI;;;;  
MW377886;Odonata;COI;;;;  
MW377887;Odonata;COI;;;;  
MW377888;Odonata;COI;;;;  
MW377889;Odonata;COI;;;;  
MW377890;Odonata;COI;;;;  
MW490099;Odonata;COI;;;;  
MW490107;Odonata;COI;;;;  
MW490111;Odonata;COI;;;;  
MW490114;Odonata;COI;;;;  
MW490120;Odonata;COI;;;;  
MW490123;Odonata;COI;;;;  
MW490139;Odonata;COI;;;;  
MW490149;Odonata;COI;;;;  
MW490159;Odonata;COI;;;;  
MW490165;Odonata;COI;;;;  
MW490176;Odonata;COI;;;;  
MW490181;Odonata;COI;;;;  
MW490183;Odonata;COI;;;;  
MW490184;Odonata;COI;;;;  
MW490198;Odonata;COI;;;;  
MW490204;Odonata;COI;;;;  
MW490206;Odonata;COI;;;;  
MW490214;Odonata;COI;;;;  
MW490219;Odonata;COI;;;;  
MW490226;Odonata;COI;;;;  
MW490233;Odonata;COI;;;;  
MW490240;Odonata;COI;;;;  
MW490247;Odonata;COI;;;;  
MW490269;Odonata;COI;;;;  
MW490279;Odonata;COI;;;;  
MW490282;Odonata;COI;;;;  
MW490289;Odonata;COI;;;;  
MW490306;Odonata;COI;;;;  
MW490307;Odonata;COI;;;;  
MW490329;Odonata;COI;;;;  
MW490336;Odonata;COI;;;;  
MW490340;Odonata;COI;;;;

MW490347;Odonata;COI;;;;  
MW490363;Odonata;COI;;;;  
MW490381;Odonata;COI;;;;  
MW490397;Odonata;COI;;;;  
MW490406;Odonata;COI;;;;  
MW490436;Odonata;COI;;;;  
MW490437;Odonata;COI;;;;  
MW490440;Odonata;COI;;;;  
MW490442;Odonata;COI;;;;  
MW490446;Odonata;COI;;;;  
MW490447;Odonata;COI;;;;  
MW490454;Odonata;COI;;;;  
MW490467;Odonata;COI;;;;  
MW490484;Odonata;COI;;;;  
MW490488;Odonata;COI;;;;  
MW490493;Odonata;COI;;;;  
MW490498;Odonata;COI;;;;  
MW490524;Odonata;COI;;;;  
MW490540;Odonata;COI;;;;  
MW490553;Odonata;COI;;;;  
MW490562;Odonata;COI;;;;  
MW509059;Odonata;COI;;;;  
MW509060;Odonata;COI;;;;  
MW509061;Odonata;COI;;;;  
MZ508997;Odonata;COI;;;;  
MZ508998;Odonata;COI;;;;  
MZ508999;Odonata;COI;;;;  
MZ509000;Odonata;COI;;;;  
MZ509001;Odonata;COI;;;;  
MZ657068;Odonata;COI;;;;  
MZ657345;Odonata;COI;;;;  
MZ659561;Odonata;COI;;;;  
MZ660534;Odonata;COI;;;;  
MZ660783;Odonata;COI;;;;  
MZ893271;Odonata;COI;;;;  
MZ893272;Odonata;COI;;;;  
MZ893273;Odonata;COI;;;;  
MZ893274;Odonata;COI;;;;  
MZ893275;Odonata;COI;;;;  
MZ893276;Odonata;COI;;;;  
MZ893277;Odonata;COI;;;;  
MZ893278;Odonata;COI;;;;  
MZ893286;Odonata;COI;;;;  
MZ893287;Odonata;COI;;;;  
MZ893288;Odonata;COI;;;;  
MZ893289;Odonata;COI;;;;  
MZ893290;Odonata;COI;;;;  
MZ893291;Odonata;COI;;;;  
MZ893292;Odonata;COI;;;;  
MZ893298;Odonata;COI;;;;  
MZ893299;Odonata;COI;;;;  
MZ893300;Odonata;COI;;;;  
MZ893301;Odonata;COI;;;;  
MZ893302;Odonata;COI;;;;  
MZ893303;Odonata;COI;;;;  
MZ893304;Odonata;COI;;;;  
MZ893305;Odonata;COI;;;;  
MZ893306;Odonata;COI;;;;  
MZ893307;Odonata;COI;;;;  
MZ893308;Odonata;COI;;;;  
MZ893309;Odonata;COI;;;;  
MZ893310;Odonata;COI;;;;  
MZ893311;Odonata;COI;;;;  
MZ893312;Odonata;COI;;;;  
MZ893313;Odonata;COI;;;;  
MZ893314;Odonata;COI;;;;  
MZ893315;Odonata;COI;;;;  
MZ893316;Odonata;COI;;;;  
MZ893317;Odonata;COI;;;;  
MZ893318;Odonata;COI;;;;  
MZ893319;Odonata;COI;;;;  
MZ893320;Odonata;COI;;;;  
MZ893321;Odonata;COI;;;;  
MZ893324;Odonata;COI;;;;  
MZ893325;Odonata;COI;;;;  
MZ893326;Odonata;COI;;;;  
MZ893327;Odonata;COI;;;;  
MZ893328;Odonata;COI;;;;

MZ893329;Odonata;COI;;;;  
MZ893330;Odonata;COI;;;;  
MZ893331;Odonata;COI;;;;  
OM100714;Odonata;COI;;;;  
OM100716;Odonata;COI;;;;  
OM100717;Odonata;COI;;;;  
ON000165;Odonata;COI;;;;  
ON000166;Odonata;COI;;;;  
ON000167;Odonata;COI;;;;  
ON000168;Odonata;COI;;;;  
ON000169;Odonata;COI;;;;  
ON000170;Odonata;COI;;;;  
ON000171;Odonata;COI;;;;  
AB609581;Coleoptera;COI;;;;  
AB609582;Coleoptera;COI;;;;  
AB609583;Coleoptera;COI;;;;  
AF296554;Coleoptera;COI;;;;  
AF296555;Coleoptera;COI;;;;  
AF296556;Coleoptera;COI;;;;  
AF296557;Coleoptera;COI;;;;  
AF457789;Coleoptera;COI;;;;  
AF457790;Coleoptera;COI;;;;  
AF457791;Coleoptera;COI;;;;  
AF457792;Coleoptera;COI;;;;  
AF457793;Coleoptera;COI;;;;  
AF457794;Coleoptera;COI;;;;  
AF457795;Coleoptera;COI;;;;  
AF457796;Coleoptera;COI;;;;  
AF457797;Coleoptera;COI;;;;  
AF457798;Coleoptera;COI;;;;  
AF457799;Coleoptera;COI;;;;  
AF457800;Coleoptera;COI;;;;  
AF457801;Coleoptera;COI;;;;  
AF457802;Coleoptera;COI;;;;  
AF457803;Coleoptera;COI;;;;  
AF457804;Coleoptera;COI;;;;  
AF457805;Coleoptera;COI;;;;  
AF457806;Coleoptera;COI;;;;  
AF457807;Coleoptera;COI;;;;  
AF457808;Coleoptera;COI;;;;  
AF457809;Coleoptera;COI;;;;  
AF457810;Coleoptera;COI;;;;  
AF457811;Coleoptera;COI;;;;  
AF457812;Coleoptera;COI;;;;  
AF457813;Coleoptera;COI;;;;  
AF457814;Coleoptera;COI;;;;  
AF457815;Coleoptera;COI;;;;  
AF457816;Coleoptera;COI;;;;  
AF457817;Coleoptera;COI;;;;  
AF457818;Coleoptera;COI;;;;  
AF457819;Coleoptera;COI;;;;  
AF457820;Coleoptera;COI;;;;  
AF457821;Coleoptera;COI;;;;  
AF457822;Coleoptera;COI;;;;  
AF457823;Coleoptera;COI;;;;  
AF457824;Coleoptera;COI;;;;  
AF457825;Coleoptera;COI;;;;  
AF457826;Coleoptera;COI;;;;  
AF457827;Coleoptera;COI;;;;  
AF457828;Coleoptera;COI;;;;  
AF457829;Coleoptera;COI;;;;  
AF457830;Coleoptera;COI;;;;  
AF457831;Coleoptera;COI;;;;  
AF457832;Coleoptera;COI;;;;  
AF457833;Coleoptera;COI;;;;  
AF457834;Coleoptera;COI;;;;  
AF457835;Coleoptera;COI;;;;  
AF457836;Coleoptera;COI;;;;  
AF457837;Coleoptera;COI;;;;  
AF457838;Coleoptera;COI;;;;  
AF457839;Coleoptera;COI;;;;  
AF457840;Coleoptera;COI;;;;  
AF457841;Coleoptera;COI;;;;  
AF457842;Coleoptera;COI;;;;  
AF457843;Coleoptera;COI;;;;  
AF457844;Coleoptera;COI;;;;  
AF457845;Coleoptera;COI;;;;  
AF457846;Coleoptera;COI;;;;

AF457847;Coleoptera;COI;;;;  
AF457848;Coleoptera;COI;;;;  
AF457849;Coleoptera;COI;;;;  
AF457850;Coleoptera;COI;;;;  
AF457851;Coleoptera;COI;;;;  
AF457852;Coleoptera;COI;;;;  
AF457853;Coleoptera;COI;;;;  
AF457854;Coleoptera;COI;;;;  
AF457855;Coleoptera;COI;;;;  
AF457856;Coleoptera;COI;;;;  
AF457857;Coleoptera;COI;;;;  
AF457858;Coleoptera;COI;;;;  
AF457859;Coleoptera;COI;;;;  
AF457860;Coleoptera;COI;;;;  
AF457861;Coleoptera;COI;;;;  
AF457862;Coleoptera;COI;;;;  
AF457863;Coleoptera;COI;;;;  
AF457864;Coleoptera;COI;;;;  
AF457865;Coleoptera;COI;;;;  
AF457866;Coleoptera;COI;;;;  
AF457867;Coleoptera;COI;;;;  
AJ884601;Coleoptera;COI;;;;  
AJ884602;Coleoptera;COI;;;;  
AJ884603;Coleoptera;COI;;;;  
AJ884604;Coleoptera;COI;;;;  
AJ884607;Coleoptera;COI;;;;  
AJ884608;Coleoptera;COI;;;;  
AM283248;Coleoptera;COI;;;;  
AM283249;Coleoptera;COI;;;;  
AM283252;Coleoptera;COI;;;;  
AM423156;Coleoptera;COI;;;;  
AM423157;Coleoptera;COI;;;;  
AY260835;Coleoptera;COI;;;;  
AY260836;Coleoptera;COI;;;;  
AY260837;Coleoptera;COI;;;;  
AY260838;Coleoptera;COI;;;;  
AY260839;Coleoptera;COI;;;;  
AY260840;Coleoptera;COI;;;;  
AY260841;Coleoptera;COI;;;;  
AY260843;Coleoptera;COI;;;;  
AY260844;Coleoptera;COI;;;;  
AY264403;Coleoptera;COI;;;;  
AY389469;Coleoptera;COI;;;;  
AY389470;Coleoptera;COI;;;;  
AY389478;Coleoptera;COI;;;;  
AY389479;Coleoptera;COI;;;;  
AY389480;Coleoptera;COI;;;;  
AY389481;Coleoptera;COI;;;;  
AY389482;Coleoptera;COI;;;;  
AY389483;Coleoptera;COI;;;;  
AY796318;Coleoptera;COI;;;;  
AY796319;Coleoptera;COI;;;;  
AY796320;Coleoptera;COI;;;;  
AY796321;Coleoptera;COI;;;;  
AY796322;Coleoptera;COI;;;;  
AY796323;Coleoptera;COI;;;;  
AY796324;Coleoptera;COI;;;;  
AY796325;Coleoptera;COI;;;;  
AY796326;Coleoptera;COI;;;;  
AY796327;Coleoptera;COI;;;;  
AY796328;Coleoptera;COI;;;;  
AY796329;Coleoptera;COI;;;;  
AY796330;Coleoptera;COI;;;;  
AY796331;Coleoptera;COI;;;;  
AY796332;Coleoptera;COI;;;;  
DQ181217;Coleoptera;COI;;;;  
DQ181290;Coleoptera;COI;;;;  
DQ198545;Coleoptera;COI;;;;  
DQ198568;Coleoptera;COI;;;;  
DQ198573;Coleoptera;COI;;;;  
DQ198576;Coleoptera;COI;;;;  
DQ198589;Coleoptera;COI;;;;  
EF490176;Coleoptera;COI;;;;  
EF490189;Coleoptera;COI;;;;  
EF508056;Coleoptera;COI;;;;  
EF508059;Coleoptera;COI;;;;  
EF589370;Coleoptera;COI;;;;  
EF589372;Coleoptera;COI;;;;

EF589379;Coleoptera;COI;;;;  
EU011803;Coleoptera;COI;;;;  
EU011804;Coleoptera;COI;;;;  
EU011805;Coleoptera;COI;;;;  
EU011806;Coleoptera;COI;;;;  
EU011814;Coleoptera;COI;;;;  
EU286446;Coleoptera;COI;;;;  
EU286446;Coleoptera;COI;;;;  
EU286447;Coleoptera;COI;;;;  
EU286448;Coleoptera;COI;;;;  
EU286449;Coleoptera;COI;;;;  
EU286451;Coleoptera;COI;;;;  
EU286453;Coleoptera;COI;;;;  
EU286493;Coleoptera;COI;;;;  
EU286507;Coleoptera;COI;;;;  
EU286510;Coleoptera;COI;;;;  
EU286511;Coleoptera;COI;;;;  
EU286512;Coleoptera;COI;;;;  
EU883935;Coleoptera;COI;;;;  
EU883936;Coleoptera;COI;;;;  
EU883937;Coleoptera;COI;;;;  
FJ868695;Coleoptera;COI;;;;  
FJ903955;Coleoptera;COI;;;;  
FJ903956;Coleoptera;COI;;;;  
FJ903957;Coleoptera;COI;;;;  
FJ903961;Coleoptera;COI;;;;  
FJ903965;Coleoptera;COI;;;;  
FJ903981;Coleoptera;COI;;;;  
FJ904002;Coleoptera;COI;;;;  
FJ904003;Coleoptera;COI;;;;  
FJ904013;Coleoptera;COI;;;;  
FJ904038;Coleoptera;COI;;;;  
FJ904039;Coleoptera;COI;;;;  
FJ904041;Coleoptera;COI;;;;  
FJ904042;Coleoptera;COI;;;;  
FJ904043;Coleoptera;COI;;;;  
FJ904044;Coleoptera;COI;;;;  
FJ904048;Coleoptera;COI;;;;  
FJ904053;Coleoptera;COI;;;;  
FJ904054;Coleoptera;COI;;;;  
FJ904055;Coleoptera;COI;;;;  
FJ904056;Coleoptera;COI;;;;  
FJ904057;Coleoptera;COI;;;;  
FJ904059;Coleoptera;COI;;;;  
FJ904065;Coleoptera;COI;;;;  
FJ904067;Coleoptera;COI;;;;  
FJ904069;Coleoptera;COI;;;;  
FJ904080;Coleoptera;COI;;;;  
FJ984570;Coleoptera;COI;;;;  
FJ984571;Coleoptera;COI;;;;  
FJ984572;Coleoptera;COI;;;;  
FJ984573;Coleoptera;COI;;;;  
FJ984574;Coleoptera;COI;;;;  
FM877788;Coleoptera;COI;;;;  
FM877789;Coleoptera;COI;;;;  
FM877790;Coleoptera;COI;;;;  
FM877791;Coleoptera;COI;;;;  
FM877792;Coleoptera;COI;;;;  
FM877795;Coleoptera;COI;;;;  
FM877799;Coleoptera;COI;;;;  
FM877800;Coleoptera;COI;;;;  
FM877802;Coleoptera;COI;;;;  
FM877906;Coleoptera;COI;;;;  
GQ980904;Coleoptera;COI;;;;  
GQ980905;Coleoptera;COI;;;;  
GQ980953;Coleoptera;COI;;;;  
GQ980963;Coleoptera;COI;;;;  
GU003930;Coleoptera;COI;;;;  
GU003934;Coleoptera;COI;;;;  
GU003935;Coleoptera;COI;;;;  
GU981486;Coleoptera;COI;;;;  
GU981501;Coleoptera;COI;;;;  
GU987753;Coleoptera;COI;;;;  
GU987754;Coleoptera;COI;;;;  
GU987755;Coleoptera;COI;;;;  
GU987755;Coleoptera;COI;;;;  
GU987756;Coleoptera;COI;;;;  
GU987758;Coleoptera;COI;;;;

GU987764;Coleoptera;COI;;;;  
GU987767;Coleoptera;COI;;;;  
GU987770;Coleoptera;COI;;;;  
GU987771;Coleoptera;COI;;;;  
GU987771;Coleoptera;COI;;;;  
GU987772;Coleoptera;COI;;;;  
GU987772;Coleoptera;COI;;;;  
GU987776;Coleoptera;COI;;;;  
GU987777;Coleoptera;COI;;;;  
GU987786;Coleoptera;COI;;;;  
GU987806;Coleoptera;COI;;;;  
GU987808;Coleoptera;COI;;;;  
GU987809;Coleoptera;COI;;;;  
GU987809;Coleoptera;COI;;;;  
GU987810;Coleoptera;COI;;;;  
GU987813;Coleoptera;COI;;;;  
GU987814;Coleoptera;COI;;;;  
GU987816;Coleoptera;COI;;;;  
GU987842;Coleoptera;COI;;;;  
GU987843;Coleoptera;COI;;;;  
GU987845;Coleoptera;COI;;;;  
GU987846;Coleoptera;COI;;;;  
GU987849;Coleoptera;COI;;;;  
GU987850;Coleoptera;COI;;;;  
GU987851;Coleoptera;COI;;;;  
GU987855;Coleoptera;COI;;;;  
GU987870;Coleoptera;COI;;;;  
GU987871;Coleoptera;COI;;;;  
GU987872;Coleoptera;COI;;;;  
GU987873;Coleoptera;COI;;;;  
GU987878;Coleoptera;COI;;;;  
GU987879;Coleoptera;COI;;;;  
GU987880;Coleoptera;COI;;;;  
GU987880;Coleoptera;COI;;;;  
GU987881;Coleoptera;COI;;;;  
GU987882;Coleoptera;COI;;;;  
GU987892;Coleoptera;COI;;;;  
GU987895;Coleoptera;COI;;;;  
GU987896;Coleoptera;COI;;;;  
GU987896;Coleoptera;COI;;;;  
GU987897;Coleoptera;COI;;;;  
GU987898;Coleoptera;COI;;;;  
GU987966;Coleoptera;COI;;;;  
GU987967;Coleoptera;COI;;;;  
GU987970;Coleoptera;COI;;;;  
GU987970;Coleoptera;COI;;;;  
GU987971;Coleoptera;COI;;;;  
GU987972;Coleoptera;COI;;;;  
GU987976;Coleoptera;COI;;;;  
GU987976;Coleoptera;COI;;;;  
GU987977;Coleoptera;COI;;;;  
GU987978;Coleoptera;COI;;;;  
GU987979;Coleoptera;COI;;;;  
GU987981;Coleoptera;COI;;;;  
GU987981;Coleoptera;COI;;;;  
GU987983;Coleoptera;COI;;;;  
GU987988;Coleoptera;COI;;;;  
GU987988;Coleoptera;COI;;;;  
GU987989;Coleoptera;COI;;;;  
GU988028;Coleoptera;COI;;;;  
GU988029;Coleoptera;COI;;;;  
GU988030;Coleoptera;COI;;;;  
GU988031;Coleoptera;COI;;;;  
GU988032;Coleoptera;COI;;;;  
GU988033;Coleoptera;COI;;;;  
GU988034;Coleoptera;COI;;;;  
GU988041;Coleoptera;COI;;;;  
GU988042;Coleoptera;COI;;;;  
GU988042;Coleoptera;COI;;;;  
GU988044;Coleoptera;COI;;;;  
GU988046;Coleoptera;COI;;;;  
GU988080;Coleoptera;COI;;;;  
GU988090;Coleoptera;COI;;;;  
GU988090;Coleoptera;COI;;;;  
GU988151;Coleoptera;COI;;;;  
GU988156;Coleoptera;COI;;;;  
GU988157;Coleoptera;COI;;;;  
HM417705;Coleoptera;COI;;;;

HM417712;Coleoptera;COI;;;;  
HM909126;Coleoptera;COI;;;;  
HQ333938;Coleoptera;COI;;;;  
HQ333944;Coleoptera;COI;;;;  
HQ333946;Coleoptera;COI;;;;  
HQ333973;Coleoptera;COI;;;;  
HQ334002;Coleoptera;COI;;;;  
HQ619570;Coleoptera;COI;;;;  
HQ619571;Coleoptera;COI;;;;  
HQ619599;Coleoptera;COI;;;;  
HQ619602;Coleoptera;COI;;;;  
HQ619604;Coleoptera;COI;;;;  
HQ619608;Coleoptera;COI;;;;  
HQ727683;Coleoptera;COI;;;;  
HQ727684;Coleoptera;COI;;;;  
HQ727685;Coleoptera;COI;;;;  
HQ727686;Coleoptera;COI;;;;  
HQ727687;Coleoptera;COI;;;;  
HQ727688;Coleoptera;COI;;;;  
HQ953403;Coleoptera;COI;;;;  
HQ953403;Coleoptera;COI;;;;  
HQ953486;Coleoptera;COI;;;;  
HQ953586;Coleoptera;COI;;;;  
HQ954209;Coleoptera;COI;;;;  
HQ954210;Coleoptera;COI;;;;  
HQ954260;Coleoptera;COI;;;;  
HQ954270;Coleoptera;COI;;;;  
JF889494;Coleoptera;COI;;;;  
JF889507;Coleoptera;COI;;;;  
JN299278;Coleoptera;COI;;;;  
JN676037;Coleoptera;COI;;;;  
JN676038;Coleoptera;COI;;;;  
JN676039;Coleoptera;COI;;;;  
JN676040;Coleoptera;COI;;;;  
JN676041;Coleoptera;COI;;;;  
JN676042;Coleoptera;COI;;;;  
JN676043;Coleoptera;COI;;;;  
JN676044;Coleoptera;COI;;;;  
JN676045;Coleoptera;COI;;;;  
JN676046;Coleoptera;COI;;;;  
JN676047;Coleoptera;COI;;;;  
JN676048;Coleoptera;COI;;;;  
JN676049;Coleoptera;COI;;;;  
JN676050;Coleoptera;COI;;;;  
JN676051;Coleoptera;COI;;;;  
JX263829;Coleoptera;COI;;;;  
JX263830;Coleoptera;COI;;;;  
JX263836;Coleoptera;COI;;;;  
JX263846;Coleoptera;COI;;;;  
JX263866;Coleoptera;COI;;;;  
JX626111;Coleoptera;COI;;;;  
KC132741;Coleoptera;COI;;;;  
KC160266;Coleoptera;COI;;;;  
KC160267;Coleoptera;COI;;;;  
KC160268;Coleoptera;COI;;;;  
KC524624;Coleoptera;COI;;;;  
KC593342;Coleoptera;COI;;;;  
KC593343;Coleoptera;COI;;;;  
KC593344;Coleoptera;COI;;;;  
KC758809;Coleoptera;COI;;;;  
KC758811;Coleoptera;COI;;;;  
KC758813;Coleoptera;COI;;;;  
KC758816;Coleoptera;COI;;;;  
KC758824;Coleoptera;COI;;;;  
KC758842;Coleoptera;COI;;;;  
KF625259;Coleoptera;COI;;;;  
KF625271;Coleoptera;COI;;;;  
KF625386;Coleoptera;COI;;;;  
KF625387;Coleoptera;COI;;;;  
KF625407;Coleoptera;COI;;;;  
KF625467;Coleoptera;COI;;;;  
KF680227;Coleoptera;COI;;;;  
KF680229;Coleoptera;COI;;;;  
KF680230;Coleoptera;COI;;;;  
KF680231;Coleoptera;COI;;;;  
KF680232;Coleoptera;COI;;;;  
KF680233;Coleoptera;COI;;;;  
KF680234;Coleoptera;COI;;;;

KF680235;Coleoptera;COI;;;;  
KF680236;Coleoptera;COI;;;;  
KF680237;Coleoptera;COI;;;;  
KF680241;Coleoptera;COI;;;;  
KF680257;Coleoptera;COI;;;;  
KF737071;Coleoptera;COI;;;;  
KF737072;Coleoptera;COI;;;;  
KF737073;Coleoptera;COI;;;;  
KF737074;Coleoptera;COI;;;;  
KF737075;Coleoptera;COI;;;;  
KF737076;Coleoptera;COI;;;;  
KF737077;Coleoptera;COI;;;;  
KF737078;Coleoptera;COI;;;;  
KF737079;Coleoptera;COI;;;;  
KF737080;Coleoptera;COI;;;;  
KF737081;Coleoptera;COI;;;;  
KF737082;Coleoptera;COI;;;;  
KF737083;Coleoptera;COI;;;;  
KF737084;Coleoptera;COI;;;;  
KF737085;Coleoptera;COI;;;;  
KF737086;Coleoptera;COI;;;;  
KF737087;Coleoptera;COI;;;;  
KF737088;Coleoptera;COI;;;;  
KF737089;Coleoptera;COI;;;;  
KF737090;Coleoptera;COI;;;;  
KF737091;Coleoptera;COI;;;;  
KF737092;Coleoptera;COI;;;;  
KF737093;Coleoptera;COI;;;;  
KF737094;Coleoptera;COI;;;;  
KF737096;Coleoptera;COI;;;;  
KF737097;Coleoptera;COI;;;;  
KF737098;Coleoptera;COI;;;;  
KF737099;Coleoptera;COI;;;;  
KF737100;Coleoptera;COI;;;;  
KF737101;Coleoptera;COI;;;;  
KF737102;Coleoptera;COI;;;;  
KF737103;Coleoptera;COI;;;;  
KF737104;Coleoptera;COI;;;;  
KF737105;Coleoptera;COI;;;;  
KF737106;Coleoptera;COI;;;;  
KF737107;Coleoptera;COI;;;;  
KF737108;Coleoptera;COI;;;;  
KF737109;Coleoptera;COI;;;;  
KF737111;Coleoptera;COI;;;;  
KF737111;Coleoptera;COI;;;;  
KF737112;Coleoptera;COI;;;;  
KF737119;Coleoptera;COI;;;;  
KF737120;Coleoptera;COI;;;;  
KF737121;Coleoptera;COI;;;;  
KF737125;Coleoptera;COI;;;;  
KF737126;Coleoptera;COI;;;;  
KF737127;Coleoptera;COI;;;;  
KF737128;Coleoptera;COI;;;;  
KF737129;Coleoptera;COI;;;;  
KF737130;Coleoptera;COI;;;;  
KF737131;Coleoptera;COI;;;;  
KF737132;Coleoptera;COI;;;;  
KF737133;Coleoptera;COI;;;;  
KJ867571;Coleoptera;COI;;;;  
KJ961815;Coleoptera;COI;;;;  
KJ962265;Coleoptera;COI;;;;  
KJ962306;Coleoptera;COI;;;;  
KJ962490;Coleoptera;COI;;;;  
KJ962569;Coleoptera;COI;;;;  
KJ963055;Coleoptera;COI;;;;  
KJ963200;Coleoptera;COI;;;;  
KJ963477;Coleoptera;COI;;;;  
KJ963506;Coleoptera;COI;;;;  
KJ963622;Coleoptera;COI;;;;  
KJ963907;Coleoptera;COI;;;;  
KJ963981;Coleoptera;COI;;;;  
KJ964069;Coleoptera;COI;;;;  
KJ964213;Coleoptera;COI;;;;  
KJ964357;Coleoptera;COI;;;;  
KJ964482;Coleoptera;COI;;;;  
KJ964551;Coleoptera;COI;;;;  
KJ964578;Coleoptera;COI;;;;  
KJ964683;Coleoptera;COI;;;;



KJ964792;Coleoptera;COI;;;;;  
KJ964805;Coleoptera;COI;;;;;  
KJ964900;Coleoptera;COI;;;;;  
KJ964934;Coleoptera;COI;;;;;  
KJ965043;Coleoptera;COI;;;;;  
KJ965102;Coleoptera;COI;;;;;  
KJ965130;Coleoptera;COI;;;;;  
KJ965259;Coleoptera;COI;;;;;  
KJ965629;Coleoptera;COI;;;;;  
KJ965642;Coleoptera;COI;;;;;  
KJ965661;Coleoptera;COI;;;;;  
KJ965930;Coleoptera;COI;;;;;  
KJ966019;Coleoptera;COI;;;;;  
KJ966266;Coleoptera;COI;;;;;  
KJ966621;Coleoptera;COI;;;;;  
KJ966648;Coleoptera;COI;;;;;  
KJ966656;Coleoptera;COI;;;;;  
KJ966881;Coleoptera;COI;;;;;  
KJ967076;Coleoptera;COI;;;;;  
KJ967152;Coleoptera;COI;;;;;  
KJ967219;Coleoptera;COI;;;;;  
KJ967263;Coleoptera;COI;;;;;  
KJ967420;Coleoptera;COI;;;;;  
KJ967511;Coleoptera;COI;;;;;  
KM285762;Coleoptera;COI;;;;;  
KM285773;Coleoptera;COI;;;;;  
KM285812;Coleoptera;COI;;;;;  
KM285823;Coleoptera;COI;;;;;  
KM285833;Coleoptera;COI;;;;;  
KM285839;Coleoptera;COI;;;;;  
KM285918;Coleoptera;COI;;;;;  
KM285919;Coleoptera;COI;;;;;  
KM285954;Coleoptera;COI;;;;;  
KM285956;Coleoptera;COI;;;;;  
KM285970;Coleoptera;COI;;;;;  
KM285988;Coleoptera;COI;;;;;  
KM286015;Coleoptera;COI;;;;;  
KM286021;Coleoptera;COI;;;;;  
KM286036;Coleoptera;COI;;;;;  
KM286062;Coleoptera;COI;;;;;  
KM286075;Coleoptera;COI;;;;;  
KM286086;Coleoptera;COI;;;;;  
KM286109;Coleoptera;COI;;;;;  
KM286159;Coleoptera;COI;;;;;  
KM286203;Coleoptera;COI;;;;;  
KM286218;Coleoptera;COI;;;;;  
KM286219;Coleoptera;COI;;;;;  
KM286252;Coleoptera;COI;;;;;  
KM286289;Coleoptera;COI;;;;;  
KM286291;Coleoptera;COI;;;;;  
KM286310;Coleoptera;COI;;;;;  
KM286346;Coleoptera;COI;;;;;  
KM286352;Coleoptera;COI;;;;;  
KM286353;Coleoptera;COI;;;;;  
KM286365;Coleoptera;COI;;;;;  
KM286371;Coleoptera;COI;;;;;  
KM286401;Coleoptera;COI;;;;;  
KM439142;Coleoptera;COI;;;;;  
KM439183;Coleoptera;COI;;;;;  
KM439224;Coleoptera;COI;;;;;  
KM439252;Coleoptera;COI;;;;;  
KM439268;Coleoptera;COI;;;;;  
KM439442;Coleoptera;COI;;;;;  
KM439634;Coleoptera;COI;;;;;  
KM439806;Coleoptera;COI;;;;;  
KM439943;Coleoptera;COI;;;;;  
KM440126;Coleoptera;COI;;;;;  
KM440239;Coleoptera;COI;;;;;  
KM440295;Coleoptera;COI;;;;;  
KM440303;Coleoptera;COI;;;;;  
KM440385;Coleoptera;COI;;;;;  
KM440742;Coleoptera;COI;;;;;  
KM440775;Coleoptera;COI;;;;;  
KM440930;Coleoptera;COI;;;;;  
KM441117;Coleoptera;COI;;;;;  
KM441210;Coleoptera;COI;;;;;  
KM441211;Coleoptera;COI;;;;;  
KM441574;Coleoptera;COI;;;;;

KM441747;Coleoptera;COI;;;;  
KM441833;Coleoptera;COI;;;;  
KM441833;Coleoptera;COI;;;;  
KM442322;Coleoptera;COI;;;;  
KM443041;Coleoptera;COI;;;;  
KM443070;Coleoptera;COI;;;;  
KM443128;Coleoptera;COI;;;;  
KM443374;Coleoptera;COI;;;;  
KM443481;Coleoptera;COI;;;;  
KM443546;Coleoptera;COI;;;;  
KM443724;Coleoptera;COI;;;;  
KM444049;Coleoptera;COI;;;;  
KM444094;Coleoptera;COI;;;;  
KM444138;Coleoptera;COI;;;;  
KM444190;Coleoptera;COI;;;;  
KM444338;Coleoptera;COI;;;;  
KM444338;Coleoptera;COI;;;;  
KM444452;Coleoptera;COI;;;;  
KM444513;Coleoptera;COI;;;;  
KM444576;Coleoptera;COI;;;;  
KM444613;Coleoptera;COI;;;;  
KM444799;Coleoptera;COI;;;;  
KM445093;Coleoptera;COI;;;;  
KM445093;Coleoptera;COI;;;;  
KM445130;Coleoptera;COI;;;;  
KM445202;Coleoptera;COI;;;;  
KM446024;Coleoptera;COI;;;;  
KM446311;Coleoptera;COI;;;;  
KM446511;Coleoptera;COI;;;;  
KM446591;Coleoptera;COI;;;;  
KM446785;Coleoptera;COI;;;;  
KM446851;Coleoptera;COI;;;;  
KM446871;Coleoptera;COI;;;;  
KM447067;Coleoptera;COI;;;;  
KM447238;Coleoptera;COI;;;;  
KM447620;Coleoptera;COI;;;;  
KM447626;Coleoptera;COI;;;;  
KM447733;Coleoptera;COI;;;;  
KM447747;Coleoptera;COI;;;;  
KM447850;Coleoptera;COI;;;;  
KM447908;Coleoptera;COI;;;;  
KM447951;Coleoptera;COI;;;;  
KM447980;Coleoptera;COI;;;;  
KM448077;Coleoptera;COI;;;;  
KM448128;Coleoptera;COI;;;;  
KM448177;Coleoptera;COI;;;;  
KM448328;Coleoptera;COI;;;;  
KM449044;Coleoptera;COI;;;;  
KM449191;Coleoptera;COI;;;;  
KM449264;Coleoptera;COI;;;;  
KM449356;Coleoptera;COI;;;;  
KM449381;Coleoptera;COI;;;;  
KM449677;Coleoptera;COI;;;;  
KM449706;Coleoptera;COI;;;;  
KM449810;Coleoptera;COI;;;;  
KM450068;Coleoptera;COI;;;;  
KM450093;Coleoptera;COI;;;;  
KM450153;Coleoptera;COI;;;;  
KM450211;Coleoptera;COI;;;;  
KM450280;Coleoptera;COI;;;;  
KM450500;Coleoptera;COI;;;;  
KM450698;Coleoptera;COI;;;;  
KM450755;Coleoptera;COI;;;;  
KM450819;Coleoptera;COI;;;;  
KM450842;Coleoptera;COI;;;;  
KM451116;Coleoptera;COI;;;;  
KM451136;Coleoptera;COI;;;;  
KM451282;Coleoptera;COI;;;;  
KM451343;Coleoptera;COI;;;;  
KM451368;Coleoptera;COI;;;;  
KM451533;Coleoptera;COI;;;;  
KM451925;Coleoptera;COI;;;;  
KM452118;Coleoptera;COI;;;;  
KM452426;Coleoptera;COI;;;;  
KM452605;Coleoptera;COI;;;;  
KM452608;Coleoptera;COI;;;;  
KT259032;Coleoptera;COI;;;;  
KT259033;Coleoptera;COI;;;;

[illegible]

KU144884;Coleoptera;COI;;;;  
KU906201;Coleoptera;COI;;;;  
KU906345;Coleoptera;COI;;;;  
KU906588;Coleoptera;COI;;;;  
KU906993;Coleoptera;COI;;;;  
KU907426;Coleoptera;COI;;;;  
KU907631;Coleoptera;COI;;;;  
KU907821;Coleoptera;COI;;;;  
KU908106;Coleoptera;COI;;;;  
KU908627;Coleoptera;COI;;;;  
KU908861;Coleoptera;COI;;;;  
KU908901;Coleoptera;COI;;;;  
KU908973;Coleoptera;COI;;;;  
KU909043;Coleoptera;COI;;;;  
KU909393;Coleoptera;COI;;;;  
KU909402;Coleoptera;COI;;;;  
KU909805;Coleoptera;COI;;;;  
KU910325;Coleoptera;COI;;;;  
KU910682;Coleoptera;COI;;;;  
KU910951;Coleoptera;COI;;;;  
KU910964;Coleoptera;COI;;;;  
KU911145;Coleoptera;COI;;;;  
KU911262;Coleoptera;COI;;;;  
KU911413;Coleoptera;COI;;;;  
KU911624;Coleoptera;COI;;;;  
KU911976;Coleoptera;COI;;;;  
KU912074;Coleoptera;COI;;;;  
KU912168;Coleoptera;COI;;;;  
KU912182;Coleoptera;COI;;;;  
KU912417;Coleoptera;COI;;;;  
KU912444;Coleoptera;COI;;;;  
KU912639;Coleoptera;COI;;;;  
KU912807;Coleoptera;COI;;;;  
KU913185;Coleoptera;COI;;;;  
KU913203;Coleoptera;COI;;;;  
KU913342;Coleoptera;COI;;;;  
KU913421;Coleoptera;COI;;;;  
KU913850;Coleoptera;COI;;;;  
KU914416;Coleoptera;COI;;;;  
KU914637;Coleoptera;COI;;;;  
KU914770;Coleoptera;COI;;;;  
KU915174;Coleoptera;COI;;;;  
KU915206;Coleoptera;COI;;;;  
KU915289;Coleoptera;COI;;;;  
KU915307;Coleoptera;COI;;;;  
KU915328;Coleoptera;COI;;;;  
KU915331;Coleoptera;COI;;;;  
KU915448;Coleoptera;COI;;;;  
KU915544;Coleoptera;COI;;;;  
KU915548;Coleoptera;COI;;;;  
KU915794;Coleoptera;COI;;;;  
KU915817;Coleoptera;COI;;;;  
KU915923;Coleoptera;COI;;;;  
KU915924;Coleoptera;COI;;;;  
KU916023;Coleoptera;COI;;;;  
KU916136;Coleoptera;COI;;;;  
KU916261;Coleoptera;COI;;;;  
KU916700;Coleoptera;COI;;;;  
KU916926;Coleoptera;COI;;;;  
KU917113;Coleoptera;COI;;;;  
KU917151;Coleoptera;COI;;;;  
KU917280;Coleoptera;COI;;;;  
KU917478;Coleoptera;COI;;;;  
KU917557;Coleoptera;COI;;;;  
KU917580;Coleoptera;COI;;;;  
KU917704;Coleoptera;COI;;;;  
KU917743;Coleoptera;COI;;;;  
KU918103;Coleoptera;COI;;;;  
KU918384;Coleoptera;COI;;;;  
KU918738;Coleoptera;COI;;;;  
KU919529;Coleoptera;COI;;;;  
KX092766;Coleoptera;COI;;;;  
KX092775;Coleoptera;COI;;;;  
KX092781;Coleoptera;COI;;;;  
KX092792;Coleoptera;COI;;;;  
KX638452;Coleoptera;COI;;;;  
KX638453;Coleoptera;COI;;;;  
KX638454;Coleoptera;COI;;;;

KX638455;Coleoptera;COI;;;;  
KX638456;Coleoptera;COI;;;;  
KX638457;Coleoptera;COI;;;;  
KX638458;Coleoptera;COI;;;;  
KX638459;Coleoptera;COI;;;;  
KX638460;Coleoptera;COI;;;;  
KX638461;Coleoptera;COI;;;;  
KX638462;Coleoptera;COI;;;;  
KX638463;Coleoptera;COI;;;;  
KX638464;Coleoptera;COI;;;;  
KX638465;Coleoptera;COI;;;;  
KX638466;Coleoptera;COI;;;;  
KX638467;Coleoptera;COI;;;;  
KX638468;Coleoptera;COI;;;;  
KX638469;Coleoptera;COI;;;;  
KX638470;Coleoptera;COI;;;;  
KX638471;Coleoptera;COI;;;;  
KX638472;Coleoptera;COI;;;;  
KX638473;Coleoptera;COI;;;;  
KX638474;Coleoptera;COI;;;;  
KX638475;Coleoptera;COI;;;;  
KX638476;Coleoptera;COI;;;;  
KX638477;Coleoptera;COI;;;;  
KX638478;Coleoptera;COI;;;;  
KX961659;Coleoptera;COI;;;;  
KX961660;Coleoptera;COI;;;;  
KX961661;Coleoptera;COI;;;;  
KX961662;Coleoptera;COI;;;;  
KX961663;Coleoptera;COI;;;;  
KX961664;Coleoptera;COI;;;;  
KX961665;Coleoptera;COI;;;;  
KX961666;Coleoptera;COI;;;;  
KY683691;Coleoptera;COI;;;;  
KY683700;Coleoptera;COI;;;;  
KY683704;Coleoptera;COI;;;;  
KY805887;Coleoptera;COI;;;;  
KY827326;Coleoptera;COI;;;;  
KY827327;Coleoptera;COI;;;;  
KY827328;Coleoptera;COI;;;;  
KY827329;Coleoptera;COI;;;;  
MF286059;Coleoptera;COI;;;;  
MF286060;Coleoptera;COI;;;;  
MF286061;Coleoptera;COI;;;;  
MF286063;Coleoptera;COI;;;;  
MF286066;Coleoptera;COI;;;;  
MF286067;Coleoptera;COI;;;;  
MF286068;Coleoptera;COI;;;;  
MF286069;Coleoptera;COI;;;;  
MF286070;Coleoptera;COI;;;;  
MF286074;Coleoptera;COI;;;;  
MF286075;Coleoptera;COI;;;;  
MF286076;Coleoptera;COI;;;;  
MF286077;Coleoptera;COI;;;;  
MF286078;Coleoptera;COI;;;;  
MF286079;Coleoptera;COI;;;;  
MF286080;Coleoptera;COI;;;;  
MF286081;Coleoptera;COI;;;;  
MF286084;Coleoptera;COI;;;;  
MF286085;Coleoptera;COI;;;;  
MF286094;Coleoptera;COI;;;;  
MF286095;Coleoptera;COI;;;;  
MF286096;Coleoptera;COI;;;;  
MF286097;Coleoptera;COI;;;;  
MF286102;Coleoptera;COI;;;;  
MF286102;Coleoptera;COI;;;;  
MF286103;Coleoptera;COI;;;;  
MF286103;Coleoptera;COI;;;;  
MF286108;Coleoptera;COI;;;;  
MF286109;Coleoptera;COI;;;;  
MF286110;Coleoptera;COI;;;;  
MF286111;Coleoptera;COI;;;;  
MF286112;Coleoptera;COI;;;;  
MF286113;Coleoptera;COI;;;;  
MF286114;Coleoptera;COI;;;;  
MF286115;Coleoptera;COI;;;;  
MF286116;Coleoptera;COI;;;;  
MF286117;Coleoptera;COI;;;;  
MF286118;Coleoptera;COI;;;;

MF286119;Coleoptera;COI;;;;  
MF286120;Coleoptera;COI;;;;  
MF286121;Coleoptera;COI;;;;  
MF286122;Coleoptera;COI;;;;  
MF286123;Coleoptera;COI;;;;  
MF286124;Coleoptera;COI;;;;  
MF286125;Coleoptera;COI;;;;  
MF286126;Coleoptera;COI;;;;  
MF286129;Coleoptera;COI;;;;  
MF286130;Coleoptera;COI;;;;  
MF286131;Coleoptera;COI;;;;  
MF286132;Coleoptera;COI;;;;  
MF286133;Coleoptera;COI;;;;  
MF286134;Coleoptera;COI;;;;  
MF286135;Coleoptera;COI;;;;  
MF286136;Coleoptera;COI;;;;  
MF286137;Coleoptera;COI;;;;  
MF286149;Coleoptera;COI;;;;  
MF286152;Coleoptera;COI;;;;  
MF286153;Coleoptera;COI;;;;  
MF286169;Coleoptera;COI;;;;  
MF286170;Coleoptera;COI;;;;  
MF286173;Coleoptera;COI;;;;  
MF286184;Coleoptera;COI;;;;  
MF286186;Coleoptera;COI;;;;  
MF286187;Coleoptera;COI;;;;  
MF286204;Coleoptera;COI;;;;  
MF286209;Coleoptera;COI;;;;  
MF286211;Coleoptera;COI;;;;  
MF286216;Coleoptera;COI;;;;  
MF286315;Coleoptera;COI;;;;  
MF327394;Coleoptera;COI;;;;  
MF327395;Coleoptera;COI;;;;  
MF327396;Coleoptera;COI;;;;  
MF327397;Coleoptera;COI;;;;  
MF327398;Coleoptera;COI;;;;  
MF327399;Coleoptera;COI;;;;  
MF327400;Coleoptera;COI;;;;  
MF327401;Coleoptera;COI;;;;  
MF327402;Coleoptera;COI;;;;  
MF327403;Coleoptera;COI;;;;  
MF327404;Coleoptera;COI;;;;  
MF327405;Coleoptera;COI;;;;  
MF327406;Coleoptera;COI;;;;  
MF327407;Coleoptera;COI;;;;  
MF327408;Coleoptera;COI;;;;  
MF327409;Coleoptera;COI;;;;  
MF327410;Coleoptera;COI;;;;  
MF327411;Coleoptera;COI;;;;  
MF327412;Coleoptera;COI;;;;  
MF327413;Coleoptera;COI;;;;  
MF327414;Coleoptera;COI;;;;  
MF327415;Coleoptera;COI;;;;  
MF327416;Coleoptera;COI;;;;  
MF327417;Coleoptera;COI;;;;  
MF327418;Coleoptera;COI;;;;  
MF327419;Coleoptera;COI;;;;  
MF327420;Coleoptera;COI;;;;  
MF327421;Coleoptera;COI;;;;  
MF371175;Coleoptera;COI;;;;  
MF371176;Coleoptera;COI;;;;  
MF371177;Coleoptera;COI;;;;  
MF371178;Coleoptera;COI;;;;  
MF371179;Coleoptera;COI;;;;  
MF371180;Coleoptera;COI;;;;  
MF371181;Coleoptera;COI;;;;  
MF371182;Coleoptera;COI;;;;  
MF371183;Coleoptera;COI;;;;  
MF371184;Coleoptera;COI;;;;  
MF371185;Coleoptera;COI;;;;  
MF371186;Coleoptera;COI;;;;  
MF371187;Coleoptera;COI;;;;  
MF371188;Coleoptera;COI;;;;  
MF371189;Coleoptera;COI;;;;  
MF371190;Coleoptera;COI;;;;  
MF371191;Coleoptera;COI;;;;  
MF371192;Coleoptera;COI;;;;  
MF371193;Coleoptera;COI;;;;

MF371194;Coleoptera;COI;;;;  
MF371195;Coleoptera;COI;;;;  
MF371196;Coleoptera;COI;;;;  
MF371197;Coleoptera;COI;;;;  
MF371198;Coleoptera;COI;;;;  
MF371199;Coleoptera;COI;;;;  
MF371200;Coleoptera;COI;;;;  
MF371201;Coleoptera;COI;;;;  
MF434579;Coleoptera;COI;;;;  
MF434580;Coleoptera;COI;;;;  
MF434581;Coleoptera;COI;;;;  
MF434582;Coleoptera;COI;;;;  
MF434583;Coleoptera;COI;;;;  
MF434584;Coleoptera;COI;;;;  
MF434585;Coleoptera;COI;;;;  
MF434586;Coleoptera;COI;;;;  
MF434587;Coleoptera;COI;;;;  
MF434588;Coleoptera;COI;;;;  
MF434589;Coleoptera;COI;;;;  
MF434590;Coleoptera;COI;;;;  
MF434591;Coleoptera;COI;;;;  
MF434592;Coleoptera;COI;;;;  
MF434593;Coleoptera;COI;;;;  
MF434594;Coleoptera;COI;;;;  
MF434595;Coleoptera;COI;;;;  
MF434596;Coleoptera;COI;;;;  
MF434597;Coleoptera;COI;;;;  
MF434598;Coleoptera;COI;;;;  
MF434599;Coleoptera;COI;;;;  
MF434600;Coleoptera;COI;;;;  
MF434601;Coleoptera;COI;;;;  
MF434602;Coleoptera;COI;;;;  
MF434603;Coleoptera;COI;;;;  
MF434604;Coleoptera;COI;;;;  
MF434605;Coleoptera;COI;;;;  
MF434606;Coleoptera;COI;;;;  
MF434607;Coleoptera;COI;;;;  
MF434608;Coleoptera;COI;;;;  
MF434609;Coleoptera;COI;;;;  
MF434610;Coleoptera;COI;;;;  
MF434611;Coleoptera;COI;;;;  
MF434612;Coleoptera;COI;;;;  
MF434613;Coleoptera;COI;;;;  
MF434614;Coleoptera;COI;;;;  
MF434615;Coleoptera;COI;;;;  
MF434616;Coleoptera;COI;;;;  
MF434617;Coleoptera;COI;;;;  
MF434618;Coleoptera;COI;;;;  
MF434619;Coleoptera;COI;;;;  
MF434620;Coleoptera;COI;;;;  
MF434621;Coleoptera;COI;;;;  
MF434622;Coleoptera;COI;;;;  
MF434623;Coleoptera;COI;;;;  
MF434624;Coleoptera;COI;;;;  
MF434625;Coleoptera;COI;;;;  
MF434626;Coleoptera;COI;;;;  
MF434627;Coleoptera;COI;;;;  
MF434628;Coleoptera;COI;;;;  
MF434629;Coleoptera;COI;;;;  
MF434630;Coleoptera;COI;;;;  
MF434631;Coleoptera;COI;;;;  
MF434632;Coleoptera;COI;;;;  
MF434633;Coleoptera;COI;;;;  
MF434634;Coleoptera;COI;;;;  
MF434635;Coleoptera;COI;;;;  
MF434636;Coleoptera;COI;;;;  
MF434637;Coleoptera;COI;;;;  
MF470086;Coleoptera;COI;;;;  
MF543038;Coleoptera;COI;;;;  
MF543039;Coleoptera;COI;;;;  
MG229689;Coleoptera;COI;;;;  
MG229689;Coleoptera;COI;;;;  
MG229691;Coleoptera;COI;;;;  
MG229691;Coleoptera;COI;;;;  
MG229695;Coleoptera;COI;;;;  
MG229696;Coleoptera;COI;;;;  
MG229698;Coleoptera;COI;;;;  
MG229699;Coleoptera;COI;;;;

MG229699;Coleoptera;COI;;;;  
MG229701;Coleoptera;COI;;;;  
MG229743;Coleoptera;COI;;;;  
MG229743;Coleoptera;COI;;;;  
MG229785;Coleoptera;COI;;;;  
MG229790;Coleoptera;COI;;;;  
MG229826;Coleoptera;COI;;;;  
MG229829;Coleoptera;COI;;;;  
MG230706;Coleoptera;COI;;;;  
MG322660;Coleoptera;COI;;;;  
MG322660;Coleoptera;COI;;;;  
MG322662;Coleoptera;COI;;;;  
MG322662;Coleoptera;COI;;;;  
MG322663;Coleoptera;COI;;;;  
MG322663;Coleoptera;COI;;;;  
MG322672;Coleoptera;COI;;;;  
MG322672;Coleoptera;COI;;;;  
MG813270;Coleoptera;COI;;;;  
MG813271;Coleoptera;COI;;;;  
MG813272;Coleoptera;COI;;;;  
MG813274;Coleoptera;COI;;;;  
MG813275;Coleoptera;COI;;;;  
MG813276;Coleoptera;COI;;;;  
MG813277;Coleoptera;COI;;;;  
MG813278;Coleoptera;COI;;;;  
MG813279;Coleoptera;COI;;;;  
MG813280;Coleoptera;COI;;;;  
MG813281;Coleoptera;COI;;;;  
MG813282;Coleoptera;COI;;;;  
MG813283;Coleoptera;COI;;;;  
MG813288;Coleoptera;COI;;;;  
MG813289;Coleoptera;COI;;;;  
MG813290;Coleoptera;COI;;;;  
MG813291;Coleoptera;COI;;;;  
MG813292;Coleoptera;COI;;;;  
MG813293;Coleoptera;COI;;;;  
MG813294;Coleoptera;COI;;;;  
MG813298;Coleoptera;COI;;;;  
MG813299;Coleoptera;COI;;;;  
MG813300;Coleoptera;COI;;;;  
MG813301;Coleoptera;COI;;;;  
MG813302;Coleoptera;COI;;;;  
MG813303;Coleoptera;COI;;;;  
MG813304;Coleoptera;COI;;;;  
MG813305;Coleoptera;COI;;;;  
MG813306;Coleoptera;COI;;;;  
MG813306;Coleoptera;COI;;;;  
MG813307;Coleoptera;COI;;;;  
MG813310;Coleoptera;COI;;;;  
MG813311;Coleoptera;COI;;;;  
MG813313;Coleoptera;COI;;;;  
MG813314;Coleoptera;COI;;;;  
MG813315;Coleoptera;COI;;;;  
MG813316;Coleoptera;COI;;;;  
MG813317;Coleoptera;COI;;;;  
MG813318;Coleoptera;COI;;;;  
MG813320;Coleoptera;COI;;;;  
MG813323;Coleoptera;COI;;;;  
MG813324;Coleoptera;COI;;;;  
MG813325;Coleoptera;COI;;;;  
MG813327;Coleoptera;COI;;;;  
MG813328;Coleoptera;COI;;;;  
MG813329;Coleoptera;COI;;;;  
MG813330;Coleoptera;COI;;;;  
MG813331;Coleoptera;COI;;;;  
MG813332;Coleoptera;COI;;;;  
MH020453;Coleoptera;COI;;;;  
MH020548;Coleoptera;COI;;;;  
MH020549;Coleoptera;COI;;;;  
MH020550;Coleoptera;COI;;;;  
MH020551;Coleoptera;COI;;;;  
MH029245;Coleoptera;COI;;;;  
MH235266;Coleoptera;COI;;;;  
MH235267;Coleoptera;COI;;;;  
MH235268;Coleoptera;COI;;;;  
MH235269;Coleoptera;COI;;;;  
MH235270;Coleoptera;COI;;;;  
MH235271;Coleoptera;COI;;;;



MH235272;Coleoptera;COI;;;;  
MH235284;Coleoptera;COI;;;;  
MH235299;Coleoptera;COI;;;;  
MH235332;Coleoptera;COI;;;;  
MH235333;Coleoptera;COI;;;;  
MH235334;Coleoptera;COI;;;;  
MH235335;Coleoptera;COI;;;;  
MH235336;Coleoptera;COI;;;;  
MH260900;Coleoptera;COI;;;;  
MH260901;Coleoptera;COI;;;;  
MH271197;Coleoptera;COI;;;;  
MH271198;Coleoptera;COI;;;;  
MH271199;Coleoptera;COI;;;;  
MH271200;Coleoptera;COI;;;;  
MH271201;Coleoptera;COI;;;;  
MH271202;Coleoptera;COI;;;;  
MH984362;Coleoptera;COI;;;;  
MH984363;Coleoptera;COI;;;;  
MH984366;Coleoptera;COI;;;;  
MH984463;Coleoptera;COI;;;;  
MH984479;Coleoptera;COI;;;;  
MK315155;Coleoptera;COI;;;;  
MK315156;Coleoptera;COI;;;;  
MK315157;Coleoptera;COI;;;;  
MK315158;Coleoptera;COI;;;;  
MK315159;Coleoptera;COI;;;;  
MK315160;Coleoptera;COI;;;;  
MK315161;Coleoptera;COI;;;;  
MK315162;Coleoptera;COI;;;;  
MK315163;Coleoptera;COI;;;;  
MK315164;Coleoptera;COI;;;;  
MK315165;Coleoptera;COI;;;;  
MK315166;Coleoptera;COI;;;;  
MK315167;Coleoptera;COI;;;;  
MK315168;Coleoptera;COI;;;;  
MK315169;Coleoptera;COI;;;;  
MK315170;Coleoptera;COI;;;;  
MK315171;Coleoptera;COI;;;;  
MK315172;Coleoptera;COI;;;;  
MK347662;Coleoptera;COI;;;;  
MK347675;Coleoptera;COI;;;;  
MK347684;Coleoptera;COI;;;;  
MK783322;Coleoptera;COI;;;;  
MK783323;Coleoptera;COI;;;;  
MK783324;Coleoptera;COI;;;;  
MK783325;Coleoptera;COI;;;;  
MK783326;Coleoptera;COI;;;;  
MK783327;Coleoptera;COI;;;;  
MK783328;Coleoptera;COI;;;;  
MK783329;Coleoptera;COI;;;;  
MK783330;Coleoptera;COI;;;;  
MK783331;Coleoptera;COI;;;;  
MK783332;Coleoptera;COI;;;;  
MK783333;Coleoptera;COI;;;;  
MK783334;Coleoptera;COI;;;;  
MK783335;Coleoptera;COI;;;;  
MK783336;Coleoptera;COI;;;;  
MK783337;Coleoptera;COI;;;;  
MK783338;Coleoptera;COI;;;;  
MK783339;Coleoptera;COI;;;;  
MK783340;Coleoptera;COI;;;;  
MK783341;Coleoptera;COI;;;;  
MK783342;Coleoptera;COI;;;;  
MK783343;Coleoptera;COI;;;;  
MK783344;Coleoptera;COI;;;;  
MK783345;Coleoptera;COI;;;;  
MK783346;Coleoptera;COI;;;;  
MK783347;Coleoptera;COI;;;;  
MK783348;Coleoptera;COI;;;;  
MK783349;Coleoptera;COI;;;;  
MK783350;Coleoptera;COI;;;;  
MK783351;Coleoptera;COI;;;;  
MK783352;Coleoptera;COI;;;;  
MK783353;Coleoptera;COI;;;;  
MK783354;Coleoptera;COI;;;;  
MK783355;Coleoptera;COI;;;;  
MK783356;Coleoptera;COI;;;;  
MK783357;Coleoptera;COI;;;;

[illegible]

[illegible]

[illegible]

[illegible]

MK783670;Coleoptera;COI;;;;  
MK783671;Coleoptera;COI;;;;  
MK783672;Coleoptera;COI;;;;  
MK783673;Coleoptera;COI;;;;  
MK783674;Coleoptera;COI;;;;  
MK783675;Coleoptera;COI;;;;  
MK783676;Coleoptera;COI;;;;  
MK783677;Coleoptera;COI;;;;  
MK783678;Coleoptera;COI;;;;  
MK783679;Coleoptera;COI;;;;  
MK891302;Coleoptera;COI;;;;  
MK891391;Coleoptera;COI;;;;  
MK891464;Coleoptera;COI;;;;  
MK891561;Coleoptera;COI;;;;  
MK891638;Coleoptera;COI;;;;  
MK892251;Coleoptera;COI;;;;  
MK892386;Coleoptera;COI;;;;  
MN182769;Coleoptera;COI;;;;  
MN182770;Coleoptera;COI;;;;  
MN182771;Coleoptera;COI;;;;  
MN182773;Coleoptera;COI;;;;  
MN182775;Coleoptera;COI;;;;  
MN182786;Coleoptera;COI;;;;  
MN182789;Coleoptera;COI;;;;  
MN182793;Coleoptera;COI;;;;  
MN182794;Coleoptera;COI;;;;  
MN182801;Coleoptera;COI;;;;  
MN182802;Coleoptera;COI;;;;  
MN182810;Coleoptera;COI;;;;  
MN182814;Coleoptera;COI;;;;  
MN182825;Coleoptera;COI;;;;  
MN182829;Coleoptera;COI;;;;  
MN182831;Coleoptera;COI;;;;  
MN182846;Coleoptera;COI;;;;  
MN182850;Coleoptera;COI;;;;  
MN182859;Coleoptera;COI;;;;  
MN182868;Coleoptera;COI;;;;  
MN182870;Coleoptera;COI;;;;  
MN182873;Coleoptera;COI;;;;  
MN182875;Coleoptera;COI;;;;  
MN182888;Coleoptera;COI;;;;  
MN182889;Coleoptera;COI;;;;  
MN182916;Coleoptera;COI;;;;  
MN182916;Coleoptera;COI;;;;  
MN182934;Coleoptera;COI;;;;  
MN182935;Coleoptera;COI;;;;  
MN182940;Coleoptera;COI;;;;  
MN182942;Coleoptera;COI;;;;  
MN182943;Coleoptera;COI;;;;  
MN182950;Coleoptera;COI;;;;  
MN182962;Coleoptera;COI;;;;  
MN182971;Coleoptera;COI;;;;  
MN182974;Coleoptera;COI;;;;  
MN182994;Coleoptera;COI;;;;  
MN182995;Coleoptera;COI;;;;  
MN183001;Coleoptera;COI;;;;  
MN183017;Coleoptera;COI;;;;  
MN183020;Coleoptera;COI;;;;  
MN183040;Coleoptera;COI;;;;  
MN183043;Coleoptera;COI;;;;  
MN183048;Coleoptera;COI;;;;  
MT140900;Coleoptera;COI;;;;  
MZ569316;Coleoptera;COI;;;;  
MZ569317;Coleoptera;COI;;;;  
MZ569318;Coleoptera;COI;;;;  
MZ569319;Coleoptera;COI;;;;  
MZ569320;Coleoptera;COI;;;;  
MZ569321;Coleoptera;COI;;;;  
MZ569322;Coleoptera;COI;;;;  
MZ569323;Coleoptera;COI;;;;  
MZ569324;Coleoptera;COI;;;;  
MZ569325;Coleoptera;COI;;;;  
MZ569326;Coleoptera;COI;;;;  
MZ569327;Coleoptera;COI;;;;  
MZ569328;Coleoptera;COI;;;;  
MZ569329;Coleoptera;COI;;;;  
MZ569330;Coleoptera;COI;;;;  
MZ569331;Coleoptera;COI;;;;

MZ569332;Coleoptera;COI;;;;  
MZ569333;Coleoptera;COI;;;;  
MZ569334;Coleoptera;COI;;;;  
MZ569335;Coleoptera;COI;;;;  
MZ569336;Coleoptera;COI;;;;  
MZ569337;Coleoptera;COI;;;;  
MZ569338;Coleoptera;COI;;;;  
MZ569339;Coleoptera;COI;;;;  
MZ569340;Coleoptera;COI;;;;  
MZ569341;Coleoptera;COI;;;;  
MZ569342;Coleoptera;COI;;;;  
MZ569343;Coleoptera;COI;;;;  
MZ569344;Coleoptera;COI;;;;  
MZ569345;Coleoptera;COI;;;;  
MZ569346;Coleoptera;COI;;;;  
MZ569347;Coleoptera;COI;;;;  
MZ569348;Coleoptera;COI;;;;  
MZ569349;Coleoptera;COI;;;;  
MZ569350;Coleoptera;COI;;;;  
MZ569351;Coleoptera;COI;;;;  
MZ569352;Coleoptera;COI;;;;  
MZ569353;Coleoptera;COI;;;;  
MZ569354;Coleoptera;COI;;;;  
MZ569355;Coleoptera;COI;;;;  
MZ569356;Coleoptera;COI;;;;  
MZ569357;Coleoptera;COI;;;;  
MZ569358;Coleoptera;COI;;;;  
MZ569359;Coleoptera;COI;;;;  
MZ569360;Coleoptera;COI;;;;  
MZ569361;Coleoptera;COI;;;;  
MZ569362;Coleoptera;COI;;;;  
MZ569363;Coleoptera;COI;;;;  
MZ569364;Coleoptera;COI;;;;  
MZ569365;Coleoptera;COI;;;;  
MZ607992;Coleoptera;COI;;;;  
MZ608098;Coleoptera;COI;;;;  
MZ608397;Coleoptera;COI;;;;  
MZ608688;Coleoptera;COI;;;;  
MZ608973;Coleoptera;COI;;;;  
MZ609618;Coleoptera;COI;;;;  
MZ610082;Coleoptera;COI;;;;  
MZ610090;Coleoptera;COI;;;;  
MZ610333;Coleoptera;COI;;;;  
MZ610878;Coleoptera;COI;;;;  
MZ629646;Coleoptera;COI;;;;  
MZ629988;Coleoptera;COI;;;;  
MZ630314;Coleoptera;COI;;;;  
MZ631027;Coleoptera;COI;;;;  
MZ631142;Coleoptera;COI;;;;  
MZ631796;Coleoptera;COI;;;;  
MZ632028;Coleoptera;COI;;;;  
MZ632494;Coleoptera;COI;;;;  
MZ633128;Coleoptera;COI;;;;  
MZ634092;Coleoptera;COI;;;;  
MZ634092;Coleoptera;COI;;;;  
MZ656341;Coleoptera;COI;;;;  
MZ656383;Coleoptera;COI;;;;  
MZ657595;Coleoptera;COI;;;;  
MZ658584;Coleoptera;COI;;;;  
MZ658597;Coleoptera;COI;;;;  
MZ658601;Coleoptera;COI;;;;  
MZ658922;Coleoptera;COI;;;;  
MZ659121;Coleoptera;COI;;;;  
MZ659340;Coleoptera;COI;;;;  
MZ659681;Coleoptera;COI;;;;  
MZ660707;Coleoptera;COI;;;;  
MZ660823;Coleoptera;COI;;;;  
MZ661035;Coleoptera;COI;;;;  
MZ661040;Coleoptera;COI;;;;  
OK510537;Coleoptera;COI;;;;  
OK510538;Coleoptera;COI;;;;  
OK510539;Coleoptera;COI;;;;  
OK510540;Coleoptera;COI;;;;  
OK510541;Coleoptera;COI;;;;  
OK510542;Coleoptera;COI;;;;  
OK510543;Coleoptera;COI;;;;  
OK510547;Coleoptera;COI;;;;  
OK510548;Coleoptera;COI;;;;

OK510549;Coleoptera;COI;;;;  
OK510550;Coleoptera;COI;;;;  
OK510560;Coleoptera;COI;;;;  
OK510561;Coleoptera;COI;;;;  
OK510562;Coleoptera;COI;;;;  
OK510563;Coleoptera;COI;;;;  
OK510564;Coleoptera;COI;;;;  
OK510565;Coleoptera;COI;;;;  
OK510566;Coleoptera;COI;;;;  
OK510567;Coleoptera;COI;;;;  
OK510568;Coleoptera;COI;;;;  
OK510569;Coleoptera;COI;;;;  
OK510570;Coleoptera;COI;;;;  
OK510571;Coleoptera;COI;;;;  
OK510572;Coleoptera;COI;;;;  
OK510573;Coleoptera;COI;;;;  
OK510574;Coleoptera;COI;;;;  
OK510575;Coleoptera;COI;;;;  
OK510576;Coleoptera;COI;;;;  
OK510577;Coleoptera;COI;;;;  
OK510578;Coleoptera;COI;;;;  
OP279134;Coleoptera;COI;;;;  
EF028492;Hymenoptera;COI;;;;  
EF028506;Hymenoptera;COI;;;;  
HQ948038;Hymenoptera;COI;;;;  
HQ948039;Hymenoptera;COI;;;;  
KJ836467;Hymenoptera;COI;;;;  
KJ836696;Hymenoptera;COI;;;;  
KJ837147;Hymenoptera;COI;;;;  
KJ837493;Hymenoptera;COI;;;;  
KJ837659;Hymenoptera;COI;;;;  
KJ837817;Hymenoptera;COI;;;;  
KJ838086;Hymenoptera;COI;;;;  
KJ838106;Hymenoptera;COI;;;;  
KJ838179;Hymenoptera;COI;;;;  
KJ838805;Hymenoptera;COI;;;;  
KY317973;Hymenoptera;COI;;;;  
KY317975;Hymenoptera;COI;;;;  
KY317976;Hymenoptera;COI;;;;  
KY317977;Hymenoptera;COI;;;;  
KY317978;Hymenoptera;COI;;;;  
KY317979;Hymenoptera;COI;;;;  
KY317980;Hymenoptera;COI;;;;  
LR738830;Hymenoptera;COI;;;;  
MH319246;Hymenoptera;COI;;;;  
MT869997;Hymenoptera;COI;;;;  
MZ623000;Hymenoptera;COI;;;;  
MZ626347;Hymenoptera;COI;;;;  
AB674369;Lepidoptera;COI;;;;  
AB674370;Lepidoptera;COI;;;;  
AB674378;Lepidoptera;COI;;;;  
AY346233;Lepidoptera;COI;;;;  
AY556863;Lepidoptera;COI;;;;  
AY556953;Lepidoptera;COI;;;;  
AY556961;Lepidoptera;COI;;;;  
AY557042;Lepidoptera;COI;;;;  
AY557064;Lepidoptera;COI;;;;  
AY557070;Lepidoptera;COI;;;;  
AY557071;Lepidoptera;COI;;;;  
DQ008088;Lepidoptera;COI;;;;  
DQ008090;Lepidoptera;COI;;;;  
DQ008091;Lepidoptera;COI;;;;  
FJ435341;Lepidoptera;COI;;;;  
FJ628432;Lepidoptera;COI;;;;  
FJ628433;Lepidoptera;COI;;;;  
FJ628444;Lepidoptera;COI;;;;  
FJ663252;Lepidoptera;COI;;;;  
FJ663253;Lepidoptera;COI;;;;  
FJ663676;Lepidoptera;COI;;;;  
FJ663677;Lepidoptera;COI;;;;  
FJ663678;Lepidoptera;COI;;;;  
FM196454;Lepidoptera;COI;;;;  
FM196478;Lepidoptera;COI;;;;  
FM196520;Lepidoptera;COI;;;;  
FM196524;Lepidoptera;COI;;;;  
GQ201115;Lepidoptera;COI;;;;  
GQ201119;Lepidoptera;COI;;;;  
GU669369;Lepidoptera;COI;;;;



GU669707;Lepidoptera;COI;;;;  
GU669726;Lepidoptera;COI;;;;  
GU669727;Lepidoptera;COI;;;;  
GU669777;Lepidoptera;COI;;;;  
GU669794;Lepidoptera;COI;;;;  
GU669795;Lepidoptera;COI;;;;  
GU675634;Lepidoptera;COI;;;;  
GU675663;Lepidoptera;COI;;;;  
GU675680;Lepidoptera;COI;;;;  
GU675773;Lepidoptera;COI;;;;  
GU675930;Lepidoptera;COI;;;;  
GU676006;Lepidoptera;COI;;;;  
GU676148;Lepidoptera;COI;;;;  
GU676161;Lepidoptera;COI;;;;  
GU676163;Lepidoptera;COI;;;;  
GU676170;Lepidoptera;COI;;;;  
GU676241;Lepidoptera;COI;;;;  
GU676242;Lepidoptera;COI;;;;  
GU676244;Lepidoptera;COI;;;;  
GU676309;Lepidoptera;COI;;;;  
GU676562;Lepidoptera;COI;;;;  
GU676750;Lepidoptera;COI;;;;  
GU676751;Lepidoptera;COI;;;;  
GU676756;Lepidoptera;COI;;;;  
GU676878;Lepidoptera;COI;;;;  
GU676899;Lepidoptera;COI;;;;  
GU707096;Lepidoptera;COI;;;;  
GU707267;Lepidoptera;COI;;;;  
GU947500;Lepidoptera;COI;;;;  
HM870990;Lepidoptera;COI;;;;  
HM901240;Lepidoptera;COI;;;;  
HM901259;Lepidoptera;COI;;;;  
HM901297;Lepidoptera;COI;;;;  
HM901402;Lepidoptera;COI;;;;  
HM901454;Lepidoptera;COI;;;;  
HM901470;Lepidoptera;COI;;;;  
HM901532;Lepidoptera;COI;;;;  
HM901538;Lepidoptera;COI;;;;  
HM901539;Lepidoptera;COI;;;;  
HM901540;Lepidoptera;COI;;;;  
HM901772;Lepidoptera;COI;;;;  
HM910514;Lepidoptera;COI;;;;  
HM913972;Lepidoptera;COI;;;;  
HQ003941;Lepidoptera;COI;;;;  
HQ003942;Lepidoptera;COI;;;;  
HQ003943;Lepidoptera;COI;;;;  
HQ003944;Lepidoptera;COI;;;;  
HQ003945;Lepidoptera;COI;;;;  
HQ003946;Lepidoptera;COI;;;;  
HQ004016;Lepidoptera;COI;;;;  
HQ004018;Lepidoptera;COI;;;;  
HQ004019;Lepidoptera;COI;;;;  
HQ004020;Lepidoptera;COI;;;;  
HQ004154;Lepidoptera;COI;;;;  
HQ004166;Lepidoptera;COI;;;;  
HQ004167;Lepidoptera;COI;;;;  
HQ004168;Lepidoptera;COI;;;;  
HQ004169;Lepidoptera;COI;;;;  
HQ004170;Lepidoptera;COI;;;;  
HQ004171;Lepidoptera;COI;;;;  
HQ004172;Lepidoptera;COI;;;;  
HQ004173;Lepidoptera;COI;;;;  
HQ004174;Lepidoptera;COI;;;;  
HQ004397;Lepidoptera;COI;;;;  
HQ004401;Lepidoptera;COI;;;;  
HQ004403;Lepidoptera;COI;;;;  
HQ004404;Lepidoptera;COI;;;;  
HQ004532;Lepidoptera;COI;;;;  
JF415678;Lepidoptera;COI;;;;  
JF850426;Lepidoptera;COI;;;;  
JF853646;Lepidoptera;COI;;;;  
JF853647;Lepidoptera;COI;;;;  
JF860019;Lepidoptera;COI;;;;  
JN160200;Lepidoptera;COI;;;;  
JN160201;Lepidoptera;COI;;;;  
JN160202;Lepidoptera;COI;;;;  
JN274545;Lepidoptera;COI;;;;  
JN581045;Lepidoptera;COI;;;;

JN581046;Lepidoptera;COI;;;;  
JN581047;Lepidoptera;COI;;;;  
JN581048;Lepidoptera;COI;;;;  
JN581049;Lepidoptera;COI;;;;  
JN581050;Lepidoptera;COI;;;;  
JN581051;Lepidoptera;COI;;;;  
JN581052;Lepidoptera;COI;;;;  
JN581053;Lepidoptera;COI;;;;  
JN581054;Lepidoptera;COI;;;;  
JN581055;Lepidoptera;COI;;;;  
JN581056;Lepidoptera;COI;;;;  
JN581057;Lepidoptera;COI;;;;  
JN581058;Lepidoptera;COI;;;;  
JN581059;Lepidoptera;COI;;;;  
JN581060;Lepidoptera;COI;;;;  
JQ080283;Lepidoptera;COI;;;;  
JX112882;Lepidoptera;COI;;;;  
KC462811;Lepidoptera;COI;;;;  
KF723539;Lepidoptera;COI;;;;  
KM572903;Lepidoptera;COI;;;;  
KM573283;Lepidoptera;COI;;;;  
KM972603;Lepidoptera;COI;;;;  
KM972632;Lepidoptera;COI;;;;  
KP032262;Lepidoptera;COI;;;;  
KP032280;Lepidoptera;COI;;;;  
KP032286;Lepidoptera;COI;;;;  
KP032316;Lepidoptera;COI;;;;  
KP032352;Lepidoptera;COI;;;;  
KP253333;Lepidoptera;COI;;;;  
KP253371;Lepidoptera;COI;;;;  
KP689294;Lepidoptera;COI;;;;  
KP689295;Lepidoptera;COI;;;;  
KP689296;Lepidoptera;COI;;;;  
KP689297;Lepidoptera;COI;;;;  
KP870221;Lepidoptera;COI;;;;  
KP870242;Lepidoptera;COI;;;;  
KP870332;Lepidoptera;COI;;;;  
KP870395;Lepidoptera;COI;;;;  
KP870432;Lepidoptera;COI;;;;  
KP870454;Lepidoptera;COI;;;;  
KP870544;Lepidoptera;COI;;;;  
KP870556;Lepidoptera;COI;;;;  
KP870646;Lepidoptera;COI;;;;  
KP870664;Lepidoptera;COI;;;;  
KP870699;Lepidoptera;COI;;;;  
KP870702;Lepidoptera;COI;;;;  
KP870771;Lepidoptera;COI;;;;  
KP870778;Lepidoptera;COI;;;;  
KP870786;Lepidoptera;COI;;;;  
KP870790;Lepidoptera;COI;;;;  
KP870803;Lepidoptera;COI;;;;  
KP870815;Lepidoptera;COI;;;;  
KP870825;Lepidoptera;COI;;;;  
KP870887;Lepidoptera;COI;;;;  
KP870896;Lepidoptera;COI;;;;  
KP870961;Lepidoptera;COI;;;;  
KP871171;Lepidoptera;COI;;;;  
KT792887;Lepidoptera;COI;;;;  
KT792892;Lepidoptera;COI;;;;  
KT792893;Lepidoptera;COI;;;;  
KT907186;Lepidoptera;COI;;;;  
KT907188;Lepidoptera;COI;;;;  
KT907189;Lepidoptera;COI;;;;  
KX011034;Lepidoptera;COI;;;;  
KX011035;Lepidoptera;COI;;;;  
KX011036;Lepidoptera;COI;;;;  
KX011037;Lepidoptera;COI;;;;  
KX040229;Lepidoptera;COI;;;;  
KX041759;Lepidoptera;COI;;;;  
KX045900;Lepidoptera;COI;;;;  
KX050108;Lepidoptera;COI;;;;  
KX241502;Lepidoptera;COI;;;;  
KX241503;Lepidoptera;COI;;;;  
KY128341;Lepidoptera;COI;;;;  
LC229025;Lepidoptera;COI;;;;  
LC229026;Lepidoptera;COI;;;;  
LC229027;Lepidoptera;COI;;;;  
LC340451;Lepidoptera;COI;;;;

LC340474;Lepidoptera;COI;;;;  
MG522392;Lepidoptera;COI;;;;  
MG522502;Lepidoptera;COI;;;;  
MG522604;Lepidoptera;COI;;;;  
MH418556;Lepidoptera;COI;;;;  
MH418588;Lepidoptera;COI;;;;  
MH418901;Lepidoptera;COI;;;;  
MH418997;Lepidoptera;COI;;;;  
MH419007;Lepidoptera;COI;;;;  
MH419121;Lepidoptera;COI;;;;  
MH419155;Lepidoptera;COI;;;;  
MH419515;Lepidoptera;COI;;;;  
MH419806;Lepidoptera;COI;;;;  
MH419908;Lepidoptera;COI;;;;  
MH419939;Lepidoptera;COI;;;;  
MH420001;Lepidoptera;COI;;;;  
MH420002;Lepidoptera;COI;;;;  
MH670083;Lepidoptera;COI;;;;  
MH670084;Lepidoptera;COI;;;;  
MH670085;Lepidoptera;COI;;;;  
MH670086;Lepidoptera;COI;;;;  
MH670087;Lepidoptera;COI;;;;  
MH670088;Lepidoptera;COI;;;;  
MH670089;Lepidoptera;COI;;;;  
MH670090;Lepidoptera;COI;;;;  
MH670091;Lepidoptera;COI;;;;  
MH670092;Lepidoptera;COI;;;;  
MH670093;Lepidoptera;COI;;;;  
MH670094;Lepidoptera;COI;;;;  
MH670095;Lepidoptera;COI;;;;  
MH670096;Lepidoptera;COI;;;;  
MH670097;Lepidoptera;COI;;;;  
MH670098;Lepidoptera;COI;;;;  
MH670099;Lepidoptera;COI;;;;  
MH670101;Lepidoptera;COI;;;;  
MH670102;Lepidoptera;COI;;;;  
MH670103;Lepidoptera;COI;;;;  
MH670104;Lepidoptera;COI;;;;  
MH670105;Lepidoptera;COI;;;;  
MH670106;Lepidoptera;COI;;;;  
MH670107;Lepidoptera;COI;;;;  
MH670108;Lepidoptera;COI;;;;  
MH670109;Lepidoptera;COI;;;;  
MH670110;Lepidoptera;COI;;;;  
MH670111;Lepidoptera;COI;;;;  
MH670112;Lepidoptera;COI;;;;  
MH670113;Lepidoptera;COI;;;;  
MH670117;Lepidoptera;COI;;;;  
MH670118;Lepidoptera;COI;;;;  
MH670119;Lepidoptera;COI;;;;  
MH670120;Lepidoptera;COI;;;;  
MH670121;Lepidoptera;COI;;;;  
MH670122;Lepidoptera;COI;;;;  
MH670123;Lepidoptera;COI;;;;  
MH670124;Lepidoptera;COI;;;;  
MH670126;Lepidoptera;COI;;;;  
MH670127;Lepidoptera;COI;;;;  
MH670128;Lepidoptera;COI;;;;  
MH670129;Lepidoptera;COI;;;;  
MH670130;Lepidoptera;COI;;;;  
MH670131;Lepidoptera;COI;;;;  
MH670132;Lepidoptera;COI;;;;  
MH670133;Lepidoptera;COI;;;;  
MH670134;Lepidoptera;COI;;;;  
MH670135;Lepidoptera;COI;;;;  
MH670136;Lepidoptera;COI;;;;  
MH670138;Lepidoptera;COI;;;;  
MH670139;Lepidoptera;COI;;;;  
MH670140;Lepidoptera;COI;;;;  
MH670141;Lepidoptera;COI;;;;  
MH670142;Lepidoptera;COI;;;;  
MH670143;Lepidoptera;COI;;;;  
MH670145;Lepidoptera;COI;;;;  
MH670147;Lepidoptera;COI;;;;  
MH670149;Lepidoptera;COI;;;;  
MH670150;Lepidoptera;COI;;;;  
MH670152;Lepidoptera;COI;;;;  
MH670153;Lepidoptera;COI;;;;

MH670154;Lepidoptera;COI;;;;  
MH670155;Lepidoptera;COI;;;;  
MH670156;Lepidoptera;COI;;;;  
MH670157;Lepidoptera;COI;;;;  
MH670158;Lepidoptera;COI;;;;  
MH670159;Lepidoptera;COI;;;;  
MH670161;Lepidoptera;COI;;;;  
MH670162;Lepidoptera;COI;;;;  
MH670163;Lepidoptera;COI;;;;  
MH670164;Lepidoptera;COI;;;;  
MH670166;Lepidoptera;COI;;;;  
MH670167;Lepidoptera;COI;;;;  
MH670168;Lepidoptera;COI;;;;  
MH670169;Lepidoptera;COI;;;;  
MH670170;Lepidoptera;COI;;;;  
MH670171;Lepidoptera;COI;;;;  
MH670172;Lepidoptera;COI;;;;  
MH670173;Lepidoptera;COI;;;;  
MH670174;Lepidoptera;COI;;;;  
MH670175;Lepidoptera;COI;;;;  
MH670176;Lepidoptera;COI;;;;  
MH670177;Lepidoptera;COI;;;;  
MH670178;Lepidoptera;COI;;;;  
MH670179;Lepidoptera;COI;;;;  
MH670180;Lepidoptera;COI;;;;  
MH670181;Lepidoptera;COI;;;;  
MH670182;Lepidoptera;COI;;;;  
MH670183;Lepidoptera;COI;;;;  
MH670184;Lepidoptera;COI;;;;  
MH670185;Lepidoptera;COI;;;;  
MH670188;Lepidoptera;COI;;;;  
MH670189;Lepidoptera;COI;;;;  
MH670191;Lepidoptera;COI;;;;  
MH670192;Lepidoptera;COI;;;;  
MH670193;Lepidoptera;COI;;;;  
MH670195;Lepidoptera;COI;;;;  
MH670196;Lepidoptera;COI;;;;  
MH670197;Lepidoptera;COI;;;;  
MH670199;Lepidoptera;COI;;;;  
MH670200;Lepidoptera;COI;;;;  
MH670201;Lepidoptera;COI;;;;  
MH670202;Lepidoptera;COI;;;;  
MH670203;Lepidoptera;COI;;;;  
MH670204;Lepidoptera;COI;;;;  
MH670205;Lepidoptera;COI;;;;  
MH670206;Lepidoptera;COI;;;;  
MH670207;Lepidoptera;COI;;;;  
MH670208;Lepidoptera;COI;;;;  
MH670209;Lepidoptera;COI;;;;  
MH670211;Lepidoptera;COI;;;;  
MH670212;Lepidoptera;COI;;;;  
MH670213;Lepidoptera;COI;;;;  
MH670214;Lepidoptera;COI;;;;  
MH670215;Lepidoptera;COI;;;;  
MH670216;Lepidoptera;COI;;;;  
MH670217;Lepidoptera;COI;;;;  
MH670218;Lepidoptera;COI;;;;  
MH670220;Lepidoptera;COI;;;;  
MH670221;Lepidoptera;COI;;;;  
MH670223;Lepidoptera;COI;;;;  
MH670224;Lepidoptera;COI;;;;  
MH670225;Lepidoptera;COI;;;;  
MH670226;Lepidoptera;COI;;;;  
MH670227;Lepidoptera;COI;;;;  
MH670228;Lepidoptera;COI;;;;  
MH670229;Lepidoptera;COI;;;;  
MH670230;Lepidoptera;COI;;;;  
MH670233;Lepidoptera;COI;;;;  
MH670234;Lepidoptera;COI;;;;  
MH670235;Lepidoptera;COI;;;;  
MH670236;Lepidoptera;COI;;;;  
MH670237;Lepidoptera;COI;;;;  
MH670238;Lepidoptera;COI;;;;  
MH670239;Lepidoptera;COI;;;;  
MH670240;Lepidoptera;COI;;;;  
MH670241;Lepidoptera;COI;;;;  
MK186078;Lepidoptera;COI;;;;  
MK186079;Lepidoptera;COI;;;;

MK186197;Lepidoptera;COI;;;;  
MK186198;Lepidoptera;COI;;;;  
MK186319;Lepidoptera;COI;;;;  
MK186321;Lepidoptera;COI;;;;  
MK186322;Lepidoptera;COI;;;;  
MK186745;Lepidoptera;COI;;;;  
MK186746;Lepidoptera;COI;;;;  
MK186781;Lepidoptera;COI;;;;  
MK186783;Lepidoptera;COI;;;;  
MK186785;Lepidoptera;COI;;;;  
MK186786;Lepidoptera;COI;;;;  
MK186787;Lepidoptera;COI;;;;  
MK567857;Lepidoptera;COI;;;;  
MN138508;Lepidoptera;COI;;;;  
MN138671;Lepidoptera;COI;;;;  
MN138705;Lepidoptera;COI;;;;  
MN138724;Lepidoptera;COI;;;;  
MN138754;Lepidoptera;COI;;;;  
MN138769;Lepidoptera;COI;;;;  
MN138783;Lepidoptera;COI;;;;  
MN138802;Lepidoptera;COI;;;;  
MN138839;Lepidoptera;COI;;;;  
MN138865;Lepidoptera;COI;;;;  
MN138891;Lepidoptera;COI;;;;  
MN138948;Lepidoptera;COI;;;;  
MN139035;Lepidoptera;COI;;;;  
MN139068;Lepidoptera;COI;;;;  
MN139074;Lepidoptera;COI;;;;  
MN139101;Lepidoptera;COI;;;;  
MN139111;Lepidoptera;COI;;;;  
MN139211;Lepidoptera;COI;;;;  
MN139222;Lepidoptera;COI;;;;  
MN139243;Lepidoptera;COI;;;;  
MN139267;Lepidoptera;COI;;;;  
MN139284;Lepidoptera;COI;;;;  
MN139450;Lepidoptera;COI;;;;  
MN139458;Lepidoptera;COI;;;;  
MN139470;Lepidoptera;COI;;;;  
MN139477;Lepidoptera;COI;;;;  
MN139495;Lepidoptera;COI;;;;  
MN139525;Lepidoptera;COI;;;;  
MN139535;Lepidoptera;COI;;;;  
MN139549;Lepidoptera;COI;;;;  
MN139587;Lepidoptera;COI;;;;  
MN139609;Lepidoptera;COI;;;;  
MN139658;Lepidoptera;COI;;;;  
MN139670;Lepidoptera;COI;;;;  
MN139695;Lepidoptera;COI;;;;  
MN139702;Lepidoptera;COI;;;;  
MN139733;Lepidoptera;COI;;;;  
MN139748;Lepidoptera;COI;;;;  
MN139783;Lepidoptera;COI;;;;  
MN139784;Lepidoptera;COI;;;;  
MN139816;Lepidoptera;COI;;;;  
MN139817;Lepidoptera;COI;;;;  
MN139820;Lepidoptera;COI;;;;  
MN139886;Lepidoptera;COI;;;;  
MN139896;Lepidoptera;COI;;;;  
MN139902;Lepidoptera;COI;;;;  
MN139937;Lepidoptera;COI;;;;  
MN139943;Lepidoptera;COI;;;;  
MN140045;Lepidoptera;COI;;;;  
MN140051;Lepidoptera;COI;;;;  
MN140097;Lepidoptera;COI;;;;  
MN140124;Lepidoptera;COI;;;;  
MN140139;Lepidoptera;COI;;;;  
MN140169;Lepidoptera;COI;;;;  
MN140216;Lepidoptera;COI;;;;  
MN140249;Lepidoptera;COI;;;;  
MN140253;Lepidoptera;COI;;;;  
MN140260;Lepidoptera;COI;;;;  
MN140295;Lepidoptera;COI;;;;  
MN140350;Lepidoptera;COI;;;;  
MN140442;Lepidoptera;COI;;;;  
MN140452;Lepidoptera;COI;;;;  
MN140464;Lepidoptera;COI;;;;  
MN140479;Lepidoptera;COI;;;;  
MN140502;Lepidoptera;COI;;;;

MN140540;Lepidoptera;COI;;;;  
MN140569;Lepidoptera;COI;;;;  
MN140584;Lepidoptera;COI;;;;  
MN140611;Lepidoptera;COI;;;;  
MN140648;Lepidoptera;COI;;;;  
MN140673;Lepidoptera;COI;;;;  
MN140699;Lepidoptera;COI;;;;  
MN140884;Lepidoptera;COI;;;;  
MN140888;Lepidoptera;COI;;;;  
MN140909;Lepidoptera;COI;;;;  
MN140911;Lepidoptera;COI;;;;  
MN140913;Lepidoptera;COI;;;;  
MN140927;Lepidoptera;COI;;;;  
MN140967;Lepidoptera;COI;;;;  
MN140971;Lepidoptera;COI;;;;  
MN140992;Lepidoptera;COI;;;;  
MN141054;Lepidoptera;COI;;;;  
MN141107;Lepidoptera;COI;;;;  
MN141116;Lepidoptera;COI;;;;  
MN141139;Lepidoptera;COI;;;;  
MN141151;Lepidoptera;COI;;;;  
MN141187;Lepidoptera;COI;;;;  
MN141225;Lepidoptera;COI;;;;  
MN141233;Lepidoptera;COI;;;;  
MN141234;Lepidoptera;COI;;;;  
MN141237;Lepidoptera;COI;;;;  
MN141261;Lepidoptera;COI;;;;  
MN141365;Lepidoptera;COI;;;;  
MN141433;Lepidoptera;COI;;;;  
MN141464;Lepidoptera;COI;;;;  
MN141554;Lepidoptera;COI;;;;  
MN141555;Lepidoptera;COI;;;;  
MN141559;Lepidoptera;COI;;;;  
MN141560;Lepidoptera;COI;;;;  
MN141575;Lepidoptera;COI;;;;  
MN141694;Lepidoptera;COI;;;;  
MN141708;Lepidoptera;COI;;;;  
MN141714;Lepidoptera;COI;;;;  
MN141802;Lepidoptera;COI;;;;  
MN141828;Lepidoptera;COI;;;;  
MN141839;Lepidoptera;COI;;;;  
MN141867;Lepidoptera;COI;;;;  
MN141885;Lepidoptera;COI;;;;  
MN141896;Lepidoptera;COI;;;;  
MN141920;Lepidoptera;COI;;;;  
MN141928;Lepidoptera;COI;;;;  
MN141947;Lepidoptera;COI;;;;  
MN142077;Lepidoptera;COI;;;;  
MN142166;Lepidoptera;COI;;;;  
MN142232;Lepidoptera;COI;;;;  
MN142263;Lepidoptera;COI;;;;  
MN142281;Lepidoptera;COI;;;;  
MN142331;Lepidoptera;COI;;;;  
MN142341;Lepidoptera;COI;;;;  
MN142369;Lepidoptera;COI;;;;  
MN142375;Lepidoptera;COI;;;;  
MN142382;Lepidoptera;COI;;;;  
MN142394;Lepidoptera;COI;;;;  
MN142442;Lepidoptera;COI;;;;  
MN142456;Lepidoptera;COI;;;;  
MN142472;Lepidoptera;COI;;;;  
MN142508;Lepidoptera;COI;;;;  
MN142551;Lepidoptera;COI;;;;  
MN142563;Lepidoptera;COI;;;;  
MN142568;Lepidoptera;COI;;;;  
MN142651;Lepidoptera;COI;;;;  
MN142678;Lepidoptera;COI;;;;  
MN142752;Lepidoptera;COI;;;;  
MN142779;Lepidoptera;COI;;;;  
MN142800;Lepidoptera;COI;;;;  
MN142809;Lepidoptera;COI;;;;  
MN142835;Lepidoptera;COI;;;;  
MN142886;Lepidoptera;COI;;;;  
MN142913;Lepidoptera;COI;;;;  
MN142966;Lepidoptera;COI;;;;  
MN142977;Lepidoptera;COI;;;;  
MN143082;Lepidoptera;COI;;;;  
MN143084;Lepidoptera;COI;;;;

MN143153;Lepidoptera;COI;;;;  
MN143158;Lepidoptera;COI;;;;  
MN143159;Lepidoptera;COI;;;;  
MN143168;Lepidoptera;COI;;;;  
MN143219;Lepidoptera;COI;;;;  
MN143316;Lepidoptera;COI;;;;  
MN143353;Lepidoptera;COI;;;;  
MN143419;Lepidoptera;COI;;;;  
MN143421;Lepidoptera;COI;;;;  
MN143424;Lepidoptera;COI;;;;  
MN143485;Lepidoptera;COI;;;;  
MN143519;Lepidoptera;COI;;;;  
MN143569;Lepidoptera;COI;;;;  
MN143633;Lepidoptera;COI;;;;  
MN143664;Lepidoptera;COI;;;;  
MN143699;Lepidoptera;COI;;;;  
MN143706;Lepidoptera;COI;;;;  
MN143731;Lepidoptera;COI;;;;  
MN143733;Lepidoptera;COI;;;;  
MN143775;Lepidoptera;COI;;;;  
MN143835;Lepidoptera;COI;;;;  
MN143901;Lepidoptera;COI;;;;  
MN143943;Lepidoptera;COI;;;;  
MN143971;Lepidoptera;COI;;;;  
MN143986;Lepidoptera;COI;;;;  
MN144002;Lepidoptera;COI;;;;  
MN144019;Lepidoptera;COI;;;;  
MN144053;Lepidoptera;COI;;;;  
MN144112;Lepidoptera;COI;;;;  
MN144113;Lepidoptera;COI;;;;  
MN144215;Lepidoptera;COI;;;;  
MN144238;Lepidoptera;COI;;;;  
MN144278;Lepidoptera;COI;;;;  
MN144280;Lepidoptera;COI;;;;  
MN144326;Lepidoptera;COI;;;;  
MN144411;Lepidoptera;COI;;;;  
MN144414;Lepidoptera;COI;;;;  
MN144427;Lepidoptera;COI;;;;  
MN144482;Lepidoptera;COI;;;;  
MN144483;Lepidoptera;COI;;;;  
MN144494;Lepidoptera;COI;;;;  
MN144507;Lepidoptera;COI;;;;  
MN144645;Lepidoptera;COI;;;;  
MN144682;Lepidoptera;COI;;;;  
MN144698;Lepidoptera;COI;;;;  
MN144733;Lepidoptera;COI;;;;  
MN144761;Lepidoptera;COI;;;;  
MN144825;Lepidoptera;COI;;;;  
MN144842;Lepidoptera;COI;;;;  
MN144847;Lepidoptera;COI;;;;  
MN144849;Lepidoptera;COI;;;;  
MN144877;Lepidoptera;COI;;;;  
MN144959;Lepidoptera;COI;;;;  
MN145011;Lepidoptera;COI;;;;  
MN145029;Lepidoptera;COI;;;;  
MN145061;Lepidoptera;COI;;;;  
MN145114;Lepidoptera;COI;;;;  
MN145128;Lepidoptera;COI;;;;  
MN145157;Lepidoptera;COI;;;;  
MN145160;Lepidoptera;COI;;;;  
MN145244;Lepidoptera;COI;;;;  
MN145246;Lepidoptera;COI;;;;  
MN145263;Lepidoptera;COI;;;;  
MN145297;Lepidoptera;COI;;;;  
MN145318;Lepidoptera;COI;;;;  
MN145356;Lepidoptera;COI;;;;  
MN145387;Lepidoptera;COI;;;;  
MN145394;Lepidoptera;COI;;;;  
MN145413;Lepidoptera;COI;;;;  
MN322831;Lepidoptera;COI;;;;  
MN322832;Lepidoptera;COI;;;;  
MN322837;Lepidoptera;COI;;;;  
MN322849;Lepidoptera;COI;;;;  
MN322881;Lepidoptera;COI;;;;  
MT754706;Lepidoptera;COI;;;;  
MT754707;Lepidoptera;COI;;;;  
MT754708;Lepidoptera;COI;;;;  
MT763227;Lepidoptera;COI;;;;

MT916623;Lepidoptera;COI;;;;  
MT916624;Lepidoptera;COI;;;;  
MT916625;Lepidoptera;COI;;;;  
MT916640;Lepidoptera;COI;;;;  
MT916641;Lepidoptera;COI;;;;  
MT916655;Lepidoptera;COI;;;;  
MT916656;Lepidoptera;COI;;;;  
MT916657;Lepidoptera;COI;;;;  
MW441622;Lepidoptera;COI;;;;  
MW441624;Lepidoptera;COI;;;;  
MW498994;Lepidoptera;COI;;;;  
MW499007;Lepidoptera;COI;;;;  
MW499020;Lepidoptera;COI;;;;  
MW499030;Lepidoptera;COI;;;;  
MW499088;Lepidoptera;COI;;;;  
MW499096;Lepidoptera;COI;;;;  
MW499120;Lepidoptera;COI;;;;  
MW499126;Lepidoptera;COI;;;;  
MW499211;Lepidoptera;COI;;;;  
MW499216;Lepidoptera;COI;;;;  
MW499307;Lepidoptera;COI;;;;  
MW499326;Lepidoptera;COI;;;;  
MW499333;Lepidoptera;COI;;;;  
MW499488;Lepidoptera;COI;;;;  
MW499538;Lepidoptera;COI;;;;  
MW499560;Lepidoptera;COI;;;;  
MW499561;Lepidoptera;COI;;;;  
MW499566;Lepidoptera;COI;;;;  
MW499700;Lepidoptera;COI;;;;  
MW499803;Lepidoptera;COI;;;;  
MW499824;Lepidoptera;COI;;;;  
MW499829;Lepidoptera;COI;;;;  
MW499833;Lepidoptera;COI;;;;  
MW499923;Lepidoptera;COI;;;;  
MW499957;Lepidoptera;COI;;;;  
MW500041;Lepidoptera;COI;;;;  
MW500158;Lepidoptera;COI;;;;  
MW500177;Lepidoptera;COI;;;;  
MW500191;Lepidoptera;COI;;;;  
MW500296;Lepidoptera;COI;;;;  
MW500388;Lepidoptera;COI;;;;  
MW500395;Lepidoptera;COI;;;;  
MW500413;Lepidoptera;COI;;;;  
MW500444;Lepidoptera;COI;;;;  
MW500519;Lepidoptera;COI;;;;  
MW500551;Lepidoptera;COI;;;;  
MW500622;Lepidoptera;COI;;;;  
MW500660;Lepidoptera;COI;;;;  
MW500717;Lepidoptera;COI;;;;  
MW500770;Lepidoptera;COI;;;;  
MW500821;Lepidoptera;COI;;;;  
MW500850;Lepidoptera;COI;;;;  
MW500949;Lepidoptera;COI;;;;  
MW500977;Lepidoptera;COI;;;;  
MW501187;Lepidoptera;COI;;;;  
MW501295;Lepidoptera;COI;;;;  
MW501356;Lepidoptera;COI;;;;  
MW501515;Lepidoptera;COI;;;;  
MW501521;Lepidoptera;COI;;;;  
MW501624;Lepidoptera;COI;;;;  
MW501627;Lepidoptera;COI;;;;  
MW501726;Lepidoptera;COI;;;;  
MW501777;Lepidoptera;COI;;;;  
MW501781;Lepidoptera;COI;;;;  
MW501816;Lepidoptera;COI;;;;  
MW501852;Lepidoptera;COI;;;;  
MW501962;Lepidoptera;COI;;;;  
MW502092;Lepidoptera;COI;;;;  
MW502134;Lepidoptera;COI;;;;  
MW502156;Lepidoptera;COI;;;;  
MW502248;Lepidoptera;COI;;;;  
MW502249;Lepidoptera;COI;;;;  
MW502346;Lepidoptera;COI;;;;  
MW502419;Lepidoptera;COI;;;;  
MW502424;Lepidoptera;COI;;;;  
MW502512;Lepidoptera;COI;;;;  
MW502528;Lepidoptera;COI;;;;  
MW502568;Lepidoptera;COI;;;;



MW502593;Lepidoptera;COI;;;;  
MW502603;Lepidoptera;COI;;;;  
MW502651;Lepidoptera;COI;;;;  
MW502653;Lepidoptera;COI;;;;  
MW502687;Lepidoptera;COI;;;;  
MW502694;Lepidoptera;COI;;;;  
MW502838;Lepidoptera;COI;;;;  
MW502846;Lepidoptera;COI;;;;  
MW502855;Lepidoptera;COI;;;;  
MW502909;Lepidoptera;COI;;;;  
MW503028;Lepidoptera;COI;;;;  
MW503079;Lepidoptera;COI;;;;  
MW503097;Lepidoptera;COI;;;;  
MW503108;Lepidoptera;COI;;;;  
MW503130;Lepidoptera;COI;;;;  
MW503131;Lepidoptera;COI;;;;  
MW503168;Lepidoptera;COI;;;;  
MW503184;Lepidoptera;COI;;;;  
MW503250;Lepidoptera;COI;;;;  
MW503274;Lepidoptera;COI;;;;  
MW503354;Lepidoptera;COI;;;;  
MW503389;Lepidoptera;COI;;;;  
MW503436;Lepidoptera;COI;;;;  
MW503450;Lepidoptera;COI;;;;  
MW503524;Lepidoptera;COI;;;;  
MW503592;Lepidoptera;COI;;;;  
MW503626;Lepidoptera;COI;;;;  
MW503687;Lepidoptera;COI;;;;  
MW661300;Lepidoptera;COI;;;;  
MW861639;Lepidoptera;COI;;;;  
MW861640;Lepidoptera;COI;;;;  
MW861641;Lepidoptera;COI;;;;  
MW861642;Lepidoptera;COI;;;;  
MW861643;Lepidoptera;COI;;;;  
MW861645;Lepidoptera;COI;;;;  
MW861647;Lepidoptera;COI;;;;  
MW861648;Lepidoptera;COI;;;;  
MW861649;Lepidoptera;COI;;;;  
MW861650;Lepidoptera;COI;;;;  
MW861651;Lepidoptera;COI;;;;  
MW861652;Lepidoptera;COI;;;;  
MW861653;Lepidoptera;COI;;;;  
MW861654;Lepidoptera;COI;;;;  
MW861655;Lepidoptera;COI;;;;  
MW861656;Lepidoptera;COI;;;;  
MW861658;Lepidoptera;COI;;;;  
MW861659;Lepidoptera;COI;;;;  
MW861662;Lepidoptera;COI;;;;  
MW861663;Lepidoptera;COI;;;;  
MW861664;Lepidoptera;COI;;;;  
MW861668;Lepidoptera;COI;;;;  
MW861669;Lepidoptera;COI;;;;  
MW861674;Lepidoptera;COI;;;;  
MW861675;Lepidoptera;COI;;;;  
MW861676;Lepidoptera;COI;;;;  
MW861677;Lepidoptera;COI;;;;  
MW861678;Lepidoptera;COI;;;;  
MW861679;Lepidoptera;COI;;;;  
MW861680;Lepidoptera;COI;;;;  
MZ026159;Lepidoptera;COI;;;;  
MZ026160;Lepidoptera;COI;;;;  
MZ026161;Lepidoptera;COI;;;;  
MZ026176;Lepidoptera;COI;;;;  
MZ026177;Lepidoptera;COI;;;;  
MZ026178;Lepidoptera;COI;;;;  
MZ026179;Lepidoptera;COI;;;;  
MZ026180;Lepidoptera;COI;;;;  
MZ026181;Lepidoptera;COI;;;;  
MZ026182;Lepidoptera;COI;;;;  
MZ026183;Lepidoptera;COI;;;;  
MZ026184;Lepidoptera;COI;;;;  
MZ026185;Lepidoptera;COI;;;;  
MZ026186;Lepidoptera;COI;;;;  
MZ026187;Lepidoptera;COI;;;;  
MZ026188;Lepidoptera;COI;;;;  
MZ026189;Lepidoptera;COI;;;;  
MZ026190;Lepidoptera;COI;;;;  
MZ128131;Lepidoptera;COI;;;;

MZ128132;Lepidoptera;COI;;;;  
OK345544;Lepidoptera;COI;;;;  
OK345598;Lepidoptera;COI;;;;  
OK345599;Lepidoptera;COI;;;;  
ON435776;Lepidoptera;COI;;;;  
ON436602;Lepidoptera;COI;;;;  
ON436691;Lepidoptera;COI;;;;  
ON436710;Lepidoptera;COI;;;;  
ON436711;Lepidoptera;COI;;;;  
ON436713;Lepidoptera;COI;;;;  
ON437050;Lepidoptera;COI;;;;  
OP430995;Lepidoptera;COI;;;;  
OQ121629;Lepidoptera;COI;;;;  
OQ121630;Lepidoptera;COI;;;;  
OQ121631;Lepidoptera;COI;;;;  
OQ121632;Lepidoptera;COI;;;;  
OQ121633;Lepidoptera;COI;;;;  
OQ121634;Lepidoptera;COI;;;;  
OQ121635;Lepidoptera;COI;;;;  
OQ121636;Lepidoptera;COI;;;;  
OQ121637;Lepidoptera;COI;;;;  
OQ121638;Lepidoptera;COI;;;;  
OQ121639;Lepidoptera;COI;;;;  
OQ121640;Lepidoptera;COI;;;;  
OQ121641;Lepidoptera;COI;;;;  
OQ121642;Lepidoptera;COI;;;;  
OQ121643;Lepidoptera;COI;;;;  
OQ121644;Lepidoptera;COI;;;;  
OQ121645;Lepidoptera;COI;;;;  
OQ121646;Lepidoptera;COI;;;;  
OQ121647;Lepidoptera;COI;;;;  
OQ121648;Lepidoptera;COI;;;;  
OQ121649;Lepidoptera;COI;;;;  
OQ121650;Lepidoptera;COI;;;;  
OQ121651;Lepidoptera;COI;;;;  
OQ121652;Lepidoptera;COI;;;;  
OQ121653;Lepidoptera;COI;;;;  
OQ121654;Lepidoptera;COI;;;;  
OQ121655;Lepidoptera;COI;;;;  
OQ121656;Lepidoptera;COI;;;;  
OQ121657;Lepidoptera;COI;;;;  
OQ182347;Lepidoptera;COI;;;;  
OQ182833;Lepidoptera;COI;;;;  
HM901883;Odonata;COI;;;;  
KF584932;Odonata;COI;;;;  
KF584956;Odonata;COI;;;;  
KF584957;Odonata;COI;;;;  
KF584959;Odonata;COI;;;;  
KF584960;Odonata;COI;;;;  
KF584961;Odonata;COI;;;;  
KF584962;Odonata;COI;;;;  
KF584964;Odonata;COI;;;;  
KF584965;Odonata;COI;;;;  
KF584967;Odonata;COI;;;;  
KF584968;Odonata;COI;;;;  
LC366771;Odonata;COI;;;;  
MN701478;Odonata;COI;;;;  
MN701481;Odonata;COI;;;;  
MN701482;Odonata;COI;;;;  
MN701483;Odonata;COI;;;;  
MN701486;Odonata;COI;;;;  
MN701487;Odonata;COI;;;;  
MN701491;Odonata;COI;;;;  
MN701492;Odonata;COI;;;;  
MN701493;Odonata;COI;;;;  
MN701496;Odonata;COI;;;;  
MN701497;Odonata;COI;;;;  
MN701498;Odonata;COI;;;;  
MN701499;Odonata;COI;;;;  
MN701500;Odonata;COI;;;;  
MN701502;Odonata;COI;;;;  
MN701504;Odonata;COI;;;;  
MN701505;Odonata;COI;;;;  
MN701507;Odonata;COI;;;;  
MN701508;Odonata;COI;;;;  
MN701510;Odonata;COI;;;;  
MN701512;Odonata;COI;;;;  
MN701516;Odonata;COI;;;;

MN701517;Odonata;COI;;;;  
MN701519;Odonata;COI;;;;  
MN701520;Odonata;COI;;;;  
MN701521;Odonata;COI;;;;  
MN701523;Odonata;COI;;;;  
MN701525;Odonata;COI;;;;  
MN701528;Odonata;COI;;;;  
MN701530;Odonata;COI;;;;  
MN701531;Odonata;COI;;;;  
MN701532;Odonata;COI;;;;  
MN701536;Odonata;COI;;;;  
MN701537;Odonata;COI;;;;  
MN701541;Odonata;COI;;;;  
MN701542;Odonata;COI;;;;  
MN701543;Odonata;COI;;;;  
MN701548;Odonata;COI;;;;  
MN701555;Odonata;COI;;;;  
MN701556;Odonata;COI;;;;  
MN701560;Odonata;COI;;;;  
MN731360;Odonata;COI;;;;  
MN735552;Odonata;COI;;;;  
MN957949;Odonata;COI;;;;  
MT298235;Odonata;COI;;;;  
MT298253;Odonata;COI;;;;  
MT298254;Odonata;COI;;;;  
MT298255;Odonata;COI;;;;  
MT298256;Odonata;COI;;;;  
MT298257;Odonata;COI;;;;  
MT298258;Odonata;COI;;;;  
MT298259;Odonata;COI;;;;  
MT298260;Odonata;COI;;;;  
MT298296;Odonata;COI;;;;  
MT298297;Odonata;COI;;;;  
MT298312;Odonata;COI;;;;  
MT298470;Odonata;COI;;;;  
MT298471;Odonata;COI;;;;  
MT298472;Odonata;COI;;;;  
MT298620;Odonata;COI;;;;  
MT298621;Odonata;COI;;;;  
MT298622;Odonata;COI;;;;  
MT298623;Odonata;COI;;;;  
MT298624;Odonata;COI;;;;  
MT298625;Odonata;COI;;;;  
MT298626;Odonata;COI;;;;  
MT298627;Odonata;COI;;;;  
MT298628;Odonata;COI;;;;  
MT298633;Odonata;COI;;;;  
MW139673;Odonata;COI;;;;  
MW208373;Odonata;COI;;;;  
MW208374;Odonata;COI;;;;  
MW208391;Odonata;COI;;;;  
MW208393;Odonata;COI;;;;  
MW208394;Odonata;COI;;;;  
MW208396;Odonata;COI;;;;  
MW208397;Odonata;COI;;;;  
MW208398;Odonata;COI;;;;  
MW208399;Odonata;COI;;;;  
MW208402;Odonata;COI;;;;  
MW208403;Odonata;COI;;;;  
MW208404;Odonata;COI;;;;  
MW208405;Odonata;COI;;;;  
MW208413;Odonata;COI;;;;  
MW208414;Odonata;COI;;;;  
MW208415;Odonata;COI;;;;  
MW490125;Odonata;COI;;;;  
MW490140;Odonata;COI;;;;  
MW490172;Odonata;COI;;;;  
MW490232;Odonata;COI;;;;  
MW490272;Odonata;COI;;;;  
MW490283;Odonata;COI;;;;  
MW490299;Odonata;COI;;;;  
MW490352;Odonata;COI;;;;  
MW490464;Odonata;COI;;;;  
MW490466;Odonata;COI;;;;  
MW490490;Odonata;COI;;;;  
MW490509;Odonata;COI;;;;  
MW490549;Odonata;COI;;;;  
MW570923;Odonata;COI;;;;

MW570924;Odonata;COI;;;;  
MW570925;Odonata;COI;;;;  
MZ656557;Odonata;COI;;;;  
NC\_031824;Odonata;COI;;;;  
ON003482;Odonata;COI;;;;  
ON003483;Odonata;COI;;;;  
ON003484;Odonata;COI;;;;  
ON003485;Odonata;COI;;;;  
AJ880679;Coleoptera;COI;;;;  
AJ880680;Coleoptera;COI;;;;  
AJ880681;Coleoptera;COI;;;;  
AJ880682;Coleoptera;COI;;;;  
AJ880683;Coleoptera;COI;;;;  
AM412372;Coleoptera;COI;;;;  
AM412373;Coleoptera;COI;;;;  
AM412374;Coleoptera;COI;;;;  
AM412375;Coleoptera;COI;;;;  
AM412376;Coleoptera;COI;;;;  
AM412377;Coleoptera;COI;;;;  
AM412382;Coleoptera;COI;;;;  
AM412383;Coleoptera;COI;;;;  
AM423158;Coleoptera;COI;;;;  
AM423159;Coleoptera;COI;;;;  
EU286487;Coleoptera;COI;;;;  
EU286489;Coleoptera;COI;;;;  
EU286505;Coleoptera;COI;;;;  
EU286509;Coleoptera;COI;;;;  
EU752053;Coleoptera;COI;;;;  
EU752054;Coleoptera;COI;;;;  
FM877915;Coleoptera;COI;;;;  
GQ980935;Coleoptera;COI;;;;  
GU213646;Coleoptera;COI;;;;  
GU981473;Coleoptera;COI;;;;  
GU981476;Coleoptera;COI;;;;  
GU981477;Coleoptera;COI;;;;  
GU981478;Coleoptera;COI;;;;  
GU981480;Coleoptera;COI;;;;  
GU981481;Coleoptera;COI;;;;  
GU981489;Coleoptera;COI;;;;  
GU981497;Coleoptera;COI;;;;  
GU981503;Coleoptera;COI;;;;  
GU981505;Coleoptera;COI;;;;  
GU987824;Coleoptera;COI;;;;  
GU987830;Coleoptera;COI;;;;  
GU987835;Coleoptera;COI;;;;  
GU987893;Coleoptera;COI;;;;  
GU988053;Coleoptera;COI;;;;  
GU988056;Coleoptera;COI;;;;  
HM909037;Coleoptera;COI;;;;  
HQ559243;Coleoptera;COI;;;;  
HQ559244;Coleoptera;COI;;;;  
HQ559246;Coleoptera;COI;;;;  
HQ559265;Coleoptera;COI;;;;  
HQ948196;Coleoptera;COI;;;;  
HQ948261;Coleoptera;COI;;;;  
HQ953393;Coleoptera;COI;;;;  
HQ953425;Coleoptera;COI;;;;  
HQ953467;Coleoptera;COI;;;;  
HQ953500;Coleoptera;COI;;;;  
HQ953648;Coleoptera;COI;;;;  
HQ953774;Coleoptera;COI;;;;  
HQ953775;Coleoptera;COI;;;;  
HQ953825;Coleoptera;COI;;;;  
HQ953942;Coleoptera;COI;;;;  
HQ953943;Coleoptera;COI;;;;  
HQ953981;Coleoptera;COI;;;;  
HQ953997;Coleoptera;COI;;;;  
HQ953998;Coleoptera;COI;;;;  
HQ954089;Coleoptera;COI;;;;  
HQ954277;Coleoptera;COI;;;;  
HQ954583;Coleoptera;COI;;;;  
HQ954593;Coleoptera;COI;;;;  
JF888650;Coleoptera;COI;;;;  
JF888651;Coleoptera;COI;;;;  
JF889535;Coleoptera;COI;;;;  
JF889554;Coleoptera;COI;;;;  
JF889566;Coleoptera;COI;;;;  
JF889567;Coleoptera;COI;;;;

JF889659;Coleoptera;COI;;;;;  
JN262175;Coleoptera;COI;;;;;  
JN273792;Coleoptera;COI;;;;;  
JN299247;Coleoptera;COI;;;;;  
JX263818;Coleoptera;COI;;;;;  
JX626112;Coleoptera;COI;;;;;  
JX626113;Coleoptera;COI;;;;;  
JX626114;Coleoptera;COI;;;;;  
JX626115;Coleoptera;COI;;;;;  
JX626116;Coleoptera;COI;;;;;  
JX626117;Coleoptera;COI;;;;;  
JX626118;Coleoptera;COI;;;;;  
KC845519;Coleoptera;COI;;;;;  
KJ492948;Coleoptera;COI;;;;;  
KJ492951;Coleoptera;COI;;;;;  
KJ492954;Coleoptera;COI;;;;;  
KJ492957;Coleoptera;COI;;;;;  
KJ492958;Coleoptera;COI;;;;;  
KJ492960;Coleoptera;COI;;;;;  
KJ492961;Coleoptera;COI;;;;;  
KJ492962;Coleoptera;COI;;;;;  
KJ867614;Coleoptera;COI;;;;;  
KJ867618;Coleoptera;COI;;;;;  
KJ867620;Coleoptera;COI;;;;;  
KJ961900;Coleoptera;COI;;;;;  
KJ961975;Coleoptera;COI;;;;;  
KJ962037;Coleoptera;COI;;;;;  
KJ962090;Coleoptera;COI;;;;;  
KJ962180;Coleoptera;COI;;;;;  
KJ962401;Coleoptera;COI;;;;;  
KJ962475;Coleoptera;COI;;;;;  
KJ962500;Coleoptera;COI;;;;;  
KJ962583;Coleoptera;COI;;;;;  
KJ962723;Coleoptera;COI;;;;;  
KJ962746;Coleoptera;COI;;;;;  
KJ962762;Coleoptera;COI;;;;;  
KJ962811;Coleoptera;COI;;;;;  
KJ962863;Coleoptera;COI;;;;;  
KJ962879;Coleoptera;COI;;;;;  
KJ962902;Coleoptera;COI;;;;;  
KJ962996;Coleoptera;COI;;;;;  
KJ963072;Coleoptera;COI;;;;;  
KJ963362;Coleoptera;COI;;;;;  
KJ963373;Coleoptera;COI;;;;;  
KJ963442;Coleoptera;COI;;;;;  
KJ963643;Coleoptera;COI;;;;;  
KJ963709;Coleoptera;COI;;;;;  
KJ963853;Coleoptera;COI;;;;;  
KJ963967;Coleoptera;COI;;;;;  
KJ964096;Coleoptera;COI;;;;;  
KJ964133;Coleoptera;COI;;;;;  
KJ964157;Coleoptera;COI;;;;;  
KJ964255;Coleoptera;COI;;;;;  
KJ964754;Coleoptera;COI;;;;;  
KJ964816;Coleoptera;COI;;;;;  
KJ964959;Coleoptera;COI;;;;;  
KJ965077;Coleoptera;COI;;;;;  
KJ965337;Coleoptera;COI;;;;;  
KJ965399;Coleoptera;COI;;;;;  
KJ966027;Coleoptera;COI;;;;;  
KJ966062;Coleoptera;COI;;;;;  
KJ966244;Coleoptera;COI;;;;;  
KJ966292;Coleoptera;COI;;;;;  
KJ966333;Coleoptera;COI;;;;;  
KJ966409;Coleoptera;COI;;;;;  
KJ967156;Coleoptera;COI;;;;;  
KJ967190;Coleoptera;COI;;;;;  
KJ967255;Coleoptera;COI;;;;;  
KJ967279;Coleoptera;COI;;;;;  
KJ967370;Coleoptera;COI;;;;;  
KJ967455;Coleoptera;COI;;;;;  
KJ967464;Coleoptera;COI;;;;;  
KM285754;Coleoptera;COI;;;;;  
KM285770;Coleoptera;COI;;;;;  
KM285790;Coleoptera;COI;;;;;  
KM285825;Coleoptera;COI;;;;;  
KM285826;Coleoptera;COI;;;;;  
KM285854;Coleoptera;COI;;;;;

KM285862;Coleoptera;COI;;;;  
KM285871;Coleoptera;COI;;;;  
KM285876;Coleoptera;COI;;;;  
KM285884;Coleoptera;COI;;;;  
KM285895;Coleoptera;COI;;;;  
KM285896;Coleoptera;COI;;;;  
KM285911;Coleoptera;COI;;;;  
KM285916;Coleoptera;COI;;;;  
KM285922;Coleoptera;COI;;;;  
KM285927;Coleoptera;COI;;;;  
KM285933;Coleoptera;COI;;;;  
KM285955;Coleoptera;COI;;;;  
KM285958;Coleoptera;COI;;;;  
KM285961;Coleoptera;COI;;;;  
KM285962;Coleoptera;COI;;;;  
KM285990;Coleoptera;COI;;;;  
KM286008;Coleoptera;COI;;;;  
KM286018;Coleoptera;COI;;;;  
KM286040;Coleoptera;COI;;;;  
KM286044;Coleoptera;COI;;;;  
KM286048;Coleoptera;COI;;;;  
KM286065;Coleoptera;COI;;;;  
KM286072;Coleoptera;COI;;;;  
KM286098;Coleoptera;COI;;;;  
KM286111;Coleoptera;COI;;;;  
KM286123;Coleoptera;COI;;;;  
KM286124;Coleoptera;COI;;;;  
KM286128;Coleoptera;COI;;;;  
KM286130;Coleoptera;COI;;;;  
KM286139;Coleoptera;COI;;;;  
KM286145;Coleoptera;COI;;;;  
KM286170;Coleoptera;COI;;;;  
KM286178;Coleoptera;COI;;;;  
KM286179;Coleoptera;COI;;;;  
KM286201;Coleoptera;COI;;;;  
KM286230;Coleoptera;COI;;;;  
KM286244;Coleoptera;COI;;;;  
KM286257;Coleoptera;COI;;;;  
KM286260;Coleoptera;COI;;;;  
KM286274;Coleoptera;COI;;;;  
KM286280;Coleoptera;COI;;;;  
KM286300;Coleoptera;COI;;;;  
KM286309;Coleoptera;COI;;;;  
KM286311;Coleoptera;COI;;;;  
KM286337;Coleoptera;COI;;;;  
KM286355;Coleoptera;COI;;;;  
KM286359;Coleoptera;COI;;;;  
KM286361;Coleoptera;COI;;;;  
KM286364;Coleoptera;COI;;;;  
KM286382;Coleoptera;COI;;;;  
KM286385;Coleoptera;COI;;;;  
KM286391;Coleoptera;COI;;;;  
KM286395;Coleoptera;COI;;;;  
KM286407;Coleoptera;COI;;;;  
KM439150;Coleoptera;COI;;;;  
KM439242;Coleoptera;COI;;;;  
KM439248;Coleoptera;COI;;;;  
KM439264;Coleoptera;COI;;;;  
KM439286;Coleoptera;COI;;;;  
KM439430;Coleoptera;COI;;;;  
KM439431;Coleoptera;COI;;;;  
KM439473;Coleoptera;COI;;;;  
KM439607;Coleoptera;COI;;;;  
KM439647;Coleoptera;COI;;;;  
KM439667;Coleoptera;COI;;;;  
KM439807;Coleoptera;COI;;;;  
KM440112;Coleoptera;COI;;;;  
KM440221;Coleoptera;COI;;;;  
KM440330;Coleoptera;COI;;;;  
KM440379;Coleoptera;COI;;;;  
KM440402;Coleoptera;COI;;;;  
KM440427;Coleoptera;COI;;;;  
KM440441;Coleoptera;COI;;;;  
KM440468;Coleoptera;COI;;;;  
KM440548;Coleoptera;COI;;;;  
KM440687;Coleoptera;COI;;;;  
KM440920;Coleoptera;COI;;;;  
KM441026;Coleoptera;COI;;;;

KM441040;Coleoptera;COI;;;;  
KM441079;Coleoptera;COI;;;;  
KM441127;Coleoptera;COI;;;;  
KM441301;Coleoptera;COI;;;;  
KM441453;Coleoptera;COI;;;;  
KM441534;Coleoptera;COI;;;;  
KM441572;Coleoptera;COI;;;;  
KM441741;Coleoptera;COI;;;;  
KM441749;Coleoptera;COI;;;;  
KM441850;Coleoptera;COI;;;;  
KM442023;Coleoptera;COI;;;;  
KM442328;Coleoptera;COI;;;;  
KM442364;Coleoptera;COI;;;;  
KM442509;Coleoptera;COI;;;;  
KM442770;Coleoptera;COI;;;;  
KM442950;Coleoptera;COI;;;;  
KM443253;Coleoptera;COI;;;;  
KM443370;Coleoptera;COI;;;;  
KM443372;Coleoptera;COI;;;;  
KM443460;Coleoptera;COI;;;;  
KM443511;Coleoptera;COI;;;;  
KM443719;Coleoptera;COI;;;;  
KM443740;Coleoptera;COI;;;;  
KM443834;Coleoptera;COI;;;;  
KM443844;Coleoptera;COI;;;;  
KM443869;Coleoptera;COI;;;;  
KM444488;Coleoptera;COI;;;;  
KM444591;Coleoptera;COI;;;;  
KM444596;Coleoptera;COI;;;;  
KM444710;Coleoptera;COI;;;;  
KM444798;Coleoptera;COI;;;;  
KM445044;Coleoptera;COI;;;;  
KM445092;Coleoptera;COI;;;;  
KM445144;Coleoptera;COI;;;;  
KM445160;Coleoptera;COI;;;;  
KM445305;Coleoptera;COI;;;;  
KM445321;Coleoptera;COI;;;;  
KM445412;Coleoptera;COI;;;;  
KM445499;Coleoptera;COI;;;;  
KM445619;Coleoptera;COI;;;;  
KM445722;Coleoptera;COI;;;;  
KM445749;Coleoptera;COI;;;;  
KM445822;Coleoptera;COI;;;;  
KM445977;Coleoptera;COI;;;;  
KM445979;Coleoptera;COI;;;;  
KM445982;Coleoptera;COI;;;;  
KM446033;Coleoptera;COI;;;;  
KM446060;Coleoptera;COI;;;;  
KM446068;Coleoptera;COI;;;;  
KM446120;Coleoptera;COI;;;;  
KM446189;Coleoptera;COI;;;;  
KM446254;Coleoptera;COI;;;;  
KM446613;Coleoptera;COI;;;;  
KM446627;Coleoptera;COI;;;;  
KM446636;Coleoptera;COI;;;;  
KM446650;Coleoptera;COI;;;;  
KM446656;Coleoptera;COI;;;;  
KM446734;Coleoptera;COI;;;;  
KM446739;Coleoptera;COI;;;;  
KM446741;Coleoptera;COI;;;;  
KM446786;Coleoptera;COI;;;;  
KM446847;Coleoptera;COI;;;;  
KM446864;Coleoptera;COI;;;;  
KM446951;Coleoptera;COI;;;;  
KM447220;Coleoptera;COI;;;;  
KM447234;Coleoptera;COI;;;;  
KM447314;Coleoptera;COI;;;;  
KM447419;Coleoptera;COI;;;;  
KM447434;Coleoptera;COI;;;;  
KM447455;Coleoptera;COI;;;;  
KM447639;Coleoptera;COI;;;;  
KM447694;Coleoptera;COI;;;;  
KM447844;Coleoptera;COI;;;;  
KM447881;Coleoptera;COI;;;;  
KM447966;Coleoptera;COI;;;;  
KM448032;Coleoptera;COI;;;;  
KM448148;Coleoptera;COI;;;;  
KM448321;Coleoptera;COI;;;;

KM448324;Coleoptera;COI;;;;;  
KM448343;Coleoptera;COI;;;;;  
KM448408;Coleoptera;COI;;;;;  
KM448468;Coleoptera;COI;;;;;  
KM448542;Coleoptera;COI;;;;;  
KM448634;Coleoptera;COI;;;;;  
KM448655;Coleoptera;COI;;;;;  
KM448674;Coleoptera;COI;;;;;  
KM448711;Coleoptera;COI;;;;;  
KM448852;Coleoptera;COI;;;;;  
KM448870;Coleoptera;COI;;;;;  
KM448924;Coleoptera;COI;;;;;  
KM448950;Coleoptera;COI;;;;;  
KM449354;Coleoptera;COI;;;;;  
KM449448;Coleoptera;COI;;;;;  
KM449464;Coleoptera;COI;;;;;  
KM449562;Coleoptera;COI;;;;;  
KM449563;Coleoptera;COI;;;;;  
KM449578;Coleoptera;COI;;;;;  
KM449732;Coleoptera;COI;;;;;  
KM449883;Coleoptera;COI;;;;;  
KM449954;Coleoptera;COI;;;;;  
KM450044;Coleoptera;COI;;;;;  
KM450081;Coleoptera;COI;;;;;  
KM450085;Coleoptera;COI;;;;;  
KM450097;Coleoptera;COI;;;;;  
KM450252;Coleoptera;COI;;;;;  
KM450289;Coleoptera;COI;;;;;  
KM450340;Coleoptera;COI;;;;;  
KM450511;Coleoptera;COI;;;;;  
KM450547;Coleoptera;COI;;;;;  
KM450616;Coleoptera;COI;;;;;  
KM450689;Coleoptera;COI;;;;;  
KM450747;Coleoptera;COI;;;;;  
KM450844;Coleoptera;COI;;;;;  
KM450969;Coleoptera;COI;;;;;  
KM451196;Coleoptera;COI;;;;;  
KM451230;Coleoptera;COI;;;;;  
KM451238;Coleoptera;COI;;;;;  
KM451249;Coleoptera;COI;;;;;  
KM451541;Coleoptera;COI;;;;;  
KM451559;Coleoptera;COI;;;;;  
KM451616;Coleoptera;COI;;;;;  
KM451718;Coleoptera;COI;;;;;  
KM451730;Coleoptera;COI;;;;;  
KM451750;Coleoptera;COI;;;;;  
KM451956;Coleoptera;COI;;;;;  
KM452312;Coleoptera;COI;;;;;  
KM452381;Coleoptera;COI;;;;;  
KM452392;Coleoptera;COI;;;;;  
KM452478;Coleoptera;COI;;;;;  
KM452489;Coleoptera;COI;;;;;  
KM452694;Coleoptera;COI;;;;;  
KU170190;Coleoptera;COI;;;;;  
KU906139;Coleoptera;COI;;;;;  
KU906180;Coleoptera;COI;;;;;  
KU906235;Coleoptera;COI;;;;;  
KU906270;Coleoptera;COI;;;;;  
KU906295;Coleoptera;COI;;;;;  
KU906323;Coleoptera;COI;;;;;  
KU906361;Coleoptera;COI;;;;;  
KU906428;Coleoptera;COI;;;;;  
KU906616;Coleoptera;COI;;;;;  
KU906711;Coleoptera;COI;;;;;  
KU906771;Coleoptera;COI;;;;;  
KU906952;Coleoptera;COI;;;;;  
KU906954;Coleoptera;COI;;;;;  
KU907158;Coleoptera;COI;;;;;  
KU907229;Coleoptera;COI;;;;;  
KU907248;Coleoptera;COI;;;;;  
KU907272;Coleoptera;COI;;;;;  
KU907300;Coleoptera;COI;;;;;  
KU907334;Coleoptera;COI;;;;;  
KU907343;Coleoptera;COI;;;;;  
KU907476;Coleoptera;COI;;;;;  
KU907536;Coleoptera;COI;;;;;  
KU907587;Coleoptera;COI;;;;;  
KU907752;Coleoptera;COI;;;;;



KU907781;Coleoptera;COI;;;;  
KU907805;Coleoptera;COI;;;;  
KU907927;Coleoptera;COI;;;;  
KU907975;Coleoptera;COI;;;;  
KU908166;Coleoptera;COI;;;;  
KU908314;Coleoptera;COI;;;;  
KU908434;Coleoptera;COI;;;;  
KU908589;Coleoptera;COI;;;;  
KU908735;Coleoptera;COI;;;;  
KU908807;Coleoptera;COI;;;;  
KU908820;Coleoptera;COI;;;;  
KU908989;Coleoptera;COI;;;;  
KU909045;Coleoptera;COI;;;;  
KU909073;Coleoptera;COI;;;;  
KU909169;Coleoptera;COI;;;;  
KU909290;Coleoptera;COI;;;;  
KU909323;Coleoptera;COI;;;;  
KU909483;Coleoptera;COI;;;;  
KU909583;Coleoptera;COI;;;;  
KU909639;Coleoptera;COI;;;;  
KU909698;Coleoptera;COI;;;;  
KU909765;Coleoptera;COI;;;;  
KU909825;Coleoptera;COI;;;;  
KU909832;Coleoptera;COI;;;;  
KU910033;Coleoptera;COI;;;;  
KU910422;Coleoptera;COI;;;;  
KU910678;Coleoptera;COI;;;;  
KU910698;Coleoptera;COI;;;;  
KU910793;Coleoptera;COI;;;;  
KU910837;Coleoptera;COI;;;;  
KU911123;Coleoptera;COI;;;;  
KU911153;Coleoptera;COI;;;;  
KU911205;Coleoptera;COI;;;;  
KU911284;Coleoptera;COI;;;;  
KU911352;Coleoptera;COI;;;;  
KU911368;Coleoptera;COI;;;;  
KU911394;Coleoptera;COI;;;;  
KU911462;Coleoptera;COI;;;;  
KU911487;Coleoptera;COI;;;;  
KU911511;Coleoptera;COI;;;;  
KU911598;Coleoptera;COI;;;;  
KU911599;Coleoptera;COI;;;;  
KU911641;Coleoptera;COI;;;;  
KU911744;Coleoptera;COI;;;;  
KU911828;Coleoptera;COI;;;;  
KU911898;Coleoptera;COI;;;;  
KU912029;Coleoptera;COI;;;;  
KU912067;Coleoptera;COI;;;;  
KU912238;Coleoptera;COI;;;;  
KU912320;Coleoptera;COI;;;;  
KU912341;Coleoptera;COI;;;;  
KU912402;Coleoptera;COI;;;;  
KU912448;Coleoptera;COI;;;;  
KU912497;Coleoptera;COI;;;;  
KU912587;Coleoptera;COI;;;;  
KU912590;Coleoptera;COI;;;;  
KU912628;Coleoptera;COI;;;;  
KU912632;Coleoptera;COI;;;;  
KU912765;Coleoptera;COI;;;;  
KU912857;Coleoptera;COI;;;;  
KU912904;Coleoptera;COI;;;;  
KU913033;Coleoptera;COI;;;;  
KU913239;Coleoptera;COI;;;;  
KU913568;Coleoptera;COI;;;;  
KU913603;Coleoptera;COI;;;;  
KU913641;Coleoptera;COI;;;;  
KU913757;Coleoptera;COI;;;;  
KU913831;Coleoptera;COI;;;;  
KU913896;Coleoptera;COI;;;;  
KU913949;Coleoptera;COI;;;;  
KU913976;Coleoptera;COI;;;;  
KU914029;Coleoptera;COI;;;;  
KU914041;Coleoptera;COI;;;;  
KU914257;Coleoptera;COI;;;;  
KU914270;Coleoptera;COI;;;;  
KU914328;Coleoptera;COI;;;;  
KU914402;Coleoptera;COI;;;;  
KU914532;Coleoptera;COI;;;;

KU914613;Coleoptera;COI;;;;  
KU914853;Coleoptera;COI;;;;  
KU914935;Coleoptera;COI;;;;  
KU915162;Coleoptera;COI;;;;  
KU915172;Coleoptera;COI;;;;  
KU915290;Coleoptera;COI;;;;  
KU915291;Coleoptera;COI;;;;  
KU915695;Coleoptera;COI;;;;  
KU915733;Coleoptera;COI;;;;  
KU915740;Coleoptera;COI;;;;  
KU915770;Coleoptera;COI;;;;  
KU915984;Coleoptera;COI;;;;  
KU916000;Coleoptera;COI;;;;  
KU916070;Coleoptera;COI;;;;  
KU916112;Coleoptera;COI;;;;  
KU916245;Coleoptera;COI;;;;  
KU916299;Coleoptera;COI;;;;  
KU916404;Coleoptera;COI;;;;  
KU916410;Coleoptera;COI;;;;  
KU916495;Coleoptera;COI;;;;  
KU916546;Coleoptera;COI;;;;  
KU916555;Coleoptera;COI;;;;  
KU916626;Coleoptera;COI;;;;  
KU916657;Coleoptera;COI;;;;  
KU916696;Coleoptera;COI;;;;  
KU916762;Coleoptera;COI;;;;  
KU916810;Coleoptera;COI;;;;  
KU916833;Coleoptera;COI;;;;  
KU916860;Coleoptera;COI;;;;  
KU916917;Coleoptera;COI;;;;  
KU916936;Coleoptera;COI;;;;  
KU916982;Coleoptera;COI;;;;  
KU917004;Coleoptera;COI;;;;  
KU917021;Coleoptera;COI;;;;  
KU917033;Coleoptera;COI;;;;  
KU917111;Coleoptera;COI;;;;  
KU917121;Coleoptera;COI;;;;  
KU917150;Coleoptera;COI;;;;  
KU917158;Coleoptera;COI;;;;  
KU917184;Coleoptera;COI;;;;  
KU917356;Coleoptera;COI;;;;  
KU917376;Coleoptera;COI;;;;  
KU917546;Coleoptera;COI;;;;  
KU917632;Coleoptera;COI;;;;  
KU917636;Coleoptera;COI;;;;  
KU917643;Coleoptera;COI;;;;  
KU917736;Coleoptera;COI;;;;  
KU917746;Coleoptera;COI;;;;  
KU917807;Coleoptera;COI;;;;  
KU917891;Coleoptera;COI;;;;  
KU917925;Coleoptera;COI;;;;  
KU917956;Coleoptera;COI;;;;  
KU917971;Coleoptera;COI;;;;  
KU917980;Coleoptera;COI;;;;  
KU918111;Coleoptera;COI;;;;  
KU918206;Coleoptera;COI;;;;  
KU918531;Coleoptera;COI;;;;  
KU918535;Coleoptera;COI;;;;  
KU918552;Coleoptera;COI;;;;  
KU918560;Coleoptera;COI;;;;  
KU918663;Coleoptera;COI;;;;  
KU918763;Coleoptera;COI;;;;  
KU918780;Coleoptera;COI;;;;  
KU918914;Coleoptera;COI;;;;  
KU918938;Coleoptera;COI;;;;  
KU918968;Coleoptera;COI;;;;  
KU918973;Coleoptera;COI;;;;  
KU919015;Coleoptera;COI;;;;  
KU919090;Coleoptera;COI;;;;  
KU919092;Coleoptera;COI;;;;  
KU919168;Coleoptera;COI;;;;  
KU919188;Coleoptera;COI;;;;  
KU919212;Coleoptera;COI;;;;  
KU919268;Coleoptera;COI;;;;  
KU919352;Coleoptera;COI;;;;  
KU919515;Coleoptera;COI;;;;  
KU919565;Coleoptera;COI;;;;  
KU919632;Coleoptera;COI;;;;

KY683608;Coleoptera;COI;;;;;  
KY683651;Coleoptera;COI;;;;;  
KY683661;Coleoptera;COI;;;;;  
KY683702;Coleoptera;COI;;;;;  
MF286233;Coleoptera;COI;;;;;  
MF286234;Coleoptera;COI;;;;;  
MF286235;Coleoptera;COI;;;;;  
MF286236;Coleoptera;COI;;;;;  
MF286237;Coleoptera;COI;;;;;  
MF286238;Coleoptera;COI;;;;;  
MF286242;Coleoptera;COI;;;;;  
MF286243;Coleoptera;COI;;;;;  
MF286244;Coleoptera;COI;;;;;  
MF286256;Coleoptera;COI;;;;;  
MF286257;Coleoptera;COI;;;;;  
MF286258;Coleoptera;COI;;;;;  
MF286259;Coleoptera;COI;;;;;  
MF286260;Coleoptera;COI;;;;;  
MF286261;Coleoptera;COI;;;;;  
MF286262;Coleoptera;COI;;;;;  
MF286267;Coleoptera;COI;;;;;  
MF286268;Coleoptera;COI;;;;;  
MF286273;Coleoptera;COI;;;;;  
MF286274;Coleoptera;COI;;;;;  
MF286275;Coleoptera;COI;;;;;  
MF286276;Coleoptera;COI;;;;;  
MF286279;Coleoptera;COI;;;;;  
MF286280;Coleoptera;COI;;;;;  
MF286281;Coleoptera;COI;;;;;  
MF286282;Coleoptera;COI;;;;;  
MF286288;Coleoptera;COI;;;;;  
MF286294;Coleoptera;COI;;;;;  
MF286295;Coleoptera;COI;;;;;  
MF286310;Coleoptera;COI;;;;;  
MF286316;Coleoptera;COI;;;;;  
MF286320;Coleoptera;COI;;;;;  
MF286321;Coleoptera;COI;;;;;  
MF286324;Coleoptera;COI;;;;;  
MF286325;Coleoptera;COI;;;;;  
MF286326;Coleoptera;COI;;;;;  
MF286330;Coleoptera;COI;;;;;  
MF286331;Coleoptera;COI;;;;;  
MF543037;Coleoptera;COI;;;;;  
MF611995;Coleoptera;COI;;;;;  
MF706408;Coleoptera;COI;;;;;  
MF706447;Coleoptera;COI;;;;;  
MF805176;Coleoptera;COI;;;;;  
MF805235;Coleoptera;COI;;;;;  
MH020281;Coleoptera;COI;;;;;  
MH020282;Coleoptera;COI;;;;;  
MH020283;Coleoptera;COI;;;;;  
MH020290;Coleoptera;COI;;;;;  
MH020301;Coleoptera;COI;;;;;  
MH020342;Coleoptera;COI;;;;;  
MH020343;Coleoptera;COI;;;;;  
MH020450;Coleoptera;COI;;;;;  
MH020451;Coleoptera;COI;;;;;  
MH020457;Coleoptera;COI;;;;;  
MH020458;Coleoptera;COI;;;;;  
MH020459;Coleoptera;COI;;;;;  
MH020520;Coleoptera;COI;;;;;  
MH020521;Coleoptera;COI;;;;;  
MH051954;Coleoptera;COI;;;;;  
MH115482;Coleoptera;COI;;;;;  
MH115573;Coleoptera;COI;;;;;  
MH235289;Coleoptera;COI;;;;;  
MH235290;Coleoptera;COI;;;;;  
MH235291;Coleoptera;COI;;;;;  
MH235292;Coleoptera;COI;;;;;  
MH235298;Coleoptera;COI;;;;;  
MH235302;Coleoptera;COI;;;;;  
MH235327;Coleoptera;COI;;;;;  
MH618684;Coleoptera;COI;;;;;  
MK347673;Coleoptera;COI;;;;;  
MK891560;Coleoptera;COI;;;;;  
MN182764;Coleoptera;COI;;;;;  
MN182776;Coleoptera;COI;;;;;  
MN182780;Coleoptera;COI;;;;;

MN182790;Coleoptera;COI;;;;  
MN182803;Coleoptera;COI;;;;  
MN182806;Coleoptera;COI;;;;  
MN182809;Coleoptera;COI;;;;  
MN182811;Coleoptera;COI;;;;  
MN182836;Coleoptera;COI;;;;  
MN182844;Coleoptera;COI;;;;  
MN182849;Coleoptera;COI;;;;  
MN182867;Coleoptera;COI;;;;  
MN182876;Coleoptera;COI;;;;  
MN182882;Coleoptera;COI;;;;  
MN182899;Coleoptera;COI;;;;  
MN182908;Coleoptera;COI;;;;  
MN182911;Coleoptera;COI;;;;  
MN182919;Coleoptera;COI;;;;  
MN182923;Coleoptera;COI;;;;  
MN182969;Coleoptera;COI;;;;  
MN182972;Coleoptera;COI;;;;  
MN182978;Coleoptera;COI;;;;  
MN182990;Coleoptera;COI;;;;  
MN182991;Coleoptera;COI;;;;  
MN182992;Coleoptera;COI;;;;  
MN182993;Coleoptera;COI;;;;  
MN183012;Coleoptera;COI;;;;  
MN183013;Coleoptera;COI;;;;  
MN183018;Coleoptera;COI;;;;  
MN183037;Coleoptera;COI;;;;  
MN183041;Coleoptera;COI;;;;  
MN183049;Coleoptera;COI;;;;  
MN183050;Coleoptera;COI;;;;  
MW259314;Coleoptera;COI;;;;  
MW259342;Coleoptera;COI;;;;  
MW259367;Coleoptera;COI;;;;  
MW259418;Coleoptera;COI;;;;  
MW259458;Coleoptera;COI;;;;  
MW259461;Coleoptera;COI;;;;  
MW259532;Coleoptera;COI;;;;  
MW259546;Coleoptera;COI;;;;  
MW259551;Coleoptera;COI;;;;  
MW259631;Coleoptera;COI;;;;  
MW259684;Coleoptera;COI;;;;  
MW259701;Coleoptera;COI;;;;  
MW259904;Coleoptera;COI;;;;  
MW259908;Coleoptera;COI;;;;  
MW259948;Coleoptera;COI;;;;  
MW520676;Coleoptera;COI;;;;  
MW520677;Coleoptera;COI;;;;  
MZ606899;Coleoptera;COI;;;;  
MZ607295;Coleoptera;COI;;;;  
MZ608576;Coleoptera;COI;;;;  
MZ609847;Coleoptera;COI;;;;  
MZ610834;Coleoptera;COI;;;;  
MZ629289;Coleoptera;COI;;;;  
MZ629296;Coleoptera;COI;;;;  
MZ629629;Coleoptera;COI;;;;  
MZ630288;Coleoptera;COI;;;;  
MZ630316;Coleoptera;COI;;;;  
MZ630374;Coleoptera;COI;;;;  
MZ630724;Coleoptera;COI;;;;  
MZ631986;Coleoptera;COI;;;;  
MZ632001;Coleoptera;COI;;;;  
MZ632551;Coleoptera;COI;;;;  
MZ632603;Coleoptera;COI;;;;  
MZ632747;Coleoptera;COI;;;;  
MZ633042;Coleoptera;COI;;;;  
MZ633589;Coleoptera;COI;;;;  
MZ633609;Coleoptera;COI;;;;  
MZ633936;Coleoptera;COI;;;;  
MZ633989;Coleoptera;COI;;;;  
MZ656180;Coleoptera;COI;;;;  
MZ656272;Coleoptera;COI;;;;  
MZ656302;Coleoptera;COI;;;;  
MZ656356;Coleoptera;COI;;;;  
MZ656659;Coleoptera;COI;;;;  
MZ656721;Coleoptera;COI;;;;  
MZ656926;Coleoptera;COI;;;;  
MZ656962;Coleoptera;COI;;;;  
MZ657235;Coleoptera;COI;;;;

MZ657508;Coleoptera;COI;;;;  
MZ658038;Coleoptera;COI;;;;  
MZ658860;Coleoptera;COI;;;;  
MZ658978;Coleoptera;COI;;;;  
MZ659029;Coleoptera;COI;;;;  
MZ659069;Coleoptera;COI;;;;  
MZ659211;Coleoptera;COI;;;;  
MZ659585;Coleoptera;COI;;;;  
MZ659864;Coleoptera;COI;;;;  
MZ659942;Coleoptera;COI;;;;  
MZ660210;Coleoptera;COI;;;;  
MZ660564;Coleoptera;COI;;;;  
MZ660637;Coleoptera;COI;;;;  
ON534192;Coleoptera;COI;;;;  
ON534195;Coleoptera;COI;;;;  
; ; ; ; ;  
; ; ; ; ;

# Appendix\_6\_Compared\_assignment\_methods;;;;;

accession\_number;Order;GenBank\_species\_name;SAP\_assignment;SAP\_Confidence;QIIME\_assignment;QIIME\_Confidence;

AB481434;Coleoptera;Platycerus caprea;Platycerus caprea;1;Platycerus caprea;1;  
AB481435;Coleoptera;Platycerus caraboides;Platycerus caraboides;1;Platycerus caraboides;1;  
APPEA017-08;Coleoptera;Pteryx suturalis;Pteryx suturalis;1;Pteryx suturalis;1;  
BALA001-22;Coleoptera;Xylotrechus antilope;Xylotrechus antilope;1;Xylotrechus antilope;1;  
CERAF087-07;Coleoptera;Prinobius myardi;NA;NA;Prinobius myardi;0.999999694533802;  
CERAF088-07;Coleoptera;Prinobius myardi;NA;NA;Prinobius myardi;0.999999694533802;  
CERAF089-07;Coleoptera;Prinobius myardi;Prinobius myardi;1;Prinobius myardi;0.9999999883579;  
CERAF090-07;Coleoptera;Prinobius myardi;Prinobius myardi;1;Prinobius myardi;0.9999999883579;  
CERAF122-08;Coleoptera;Prinobius myardi;Prinobius myardi;NA;Prinobius myardi;0.99999988736079;  
CERAF123-08;Coleoptera;Prinobius myardi;Prinobius myardi;NA;Prinobius myardi;0.99999990180811;  
CERAF125-08;Coleoptera;Prinobius myardi;Prinobius myardi;1;Prinobius myardi;0.99999986988926;  
CERAF127-08;Coleoptera;Prinobius myardi;Prinobius myardi;1;Prinobius myardi;0.99999993592752;  
CERAF128-08;Coleoptera;Prinobius myardi;Prinobius myardi;1;Prinobius myardi;0.99999993592752;  
CERAF129-08;Coleoptera;Prinobius myardi;Prinobius myardi;1;Prinobius myardi;0.999999974938902;  
CERAF130-08;Coleoptera;Prinobius myardi;Prinobius myardi;1;Prinobius myardi;0.999999965199664;  
CERAF131-08;Coleoptera;Prinobius myardi;NA;NA;Prinobius myardi;0.999999759602304;  
CERAF132-08;Coleoptera;Prinobius myardi;NA;NA;Prinobius myardi;0.999999733549437;  
CERAF133-08;Coleoptera;Prinobius myardi;NA;NA;Prinobius myardi;0.999999161821062;  
CERAF134-08;Coleoptera;Prinobius myardi;Prinobius myardi;1;Prinobius myardi;0.9999999883579;  
CERAF136-08;Coleoptera;Prinobius myardi;Prinobius myardi;1;Prinobius myardi;0.99999999474397;  
CERAF147-08;Coleoptera;Prinobius myardi;NA;NA;Prinobius myardi;0.999998804360875;  
CERLF460-08;Coleoptera;Herophila tristis;Herophila tristis;1;Herophila tristis;0.99999999999972;  
COLFH534-15;Coleoptera;Trixagus carinifrons;Trixagus carinifrons;1;Trixagus carinifrons;1;  
COLHH1568-18;Coleoptera;Platycerus caraboides;Platycerus caraboides;1;Platycerus caraboides;1;  
COLHH2515-19;Coleoptera;Platystomos albinus;NA;NA;Platystomos albinus;1;  
EU752053;Coleoptera;Prinobius myardi;Prinobius myardi;NA;Prinobius myardi;0.999999996562138;  
EU752054;Coleoptera;Prinobius myardi;Prinobius myardi;NA;Prinobius myardi;0.999999996562138;  
FM877915;Coleoptera;Triplax russica;Triplax russica;0.001;Triplax rufipes;0.99931320990915;  
FM877934;Coleoptera;Bitoma crenata;Bitoma crenata;1;Bitoma crenata;1;  
FM877936;Coleoptera;Cis boleti;Cis boleti;1;Cis boleti;1;  
FM877937;Coleoptera;Cis glabratus;Cis glabratus;1;Cis glabratus;1;  
GENHP406-11;Coleoptera;Glischrochilus hortensis;NA;NA;Glischrochilus hortensis;1;  
GENHP583-11;Coleoptera;Denticollis linearis;Denticollis linearis;1;Denticollis linearis;1;  
GENHP832-11;Coleoptera;Anisandrus dispar;Anisandrus dispar;1;Anisandrus dispar;1;  
GMBMJ1541-17;Coleoptera;Aulonthroscus brevicollis;Aulonthroscus brevicollis;1;Aulonthroscus brevicollis;1;  
GMBMJ1542-17;Coleoptera;Trixagus leseigneuri;Trixagus leseigneuri;1;Trixagus leseigneuri;1;  
GMBMJ1543-17;Coleoptera;Trixagus leseigneuri;Trixagus leseigneuri;1;Trixagus leseigneuri;1;  
GMBMJ1545-17;Coleoptera;Aulonthroscus brevicollis;Aulonthroscus brevicollis;1;Aulonthroscus brevicollis;1;  
GMBMJ1547-17;Coleoptera;Trixagus carinifrons;Trixagus carinifrons;1;Trixagus carinifrons;1;  
GMBMJ1548-17;Coleoptera;Aulonthroscus brevicollis;Aulonthroscus brevicollis;1;Aulonthroscus brevicollis;1;  
GMBMJ1769-17;Coleoptera;Anisandrus dispar;Anisandrus dispar;1;Anisandrus dispar;1;  
GMBMJ1822-17;Coleoptera;Xyleborinus saxesenii;Xyleborinus saxesenii;1;Xyleborinus saxesenii;1;  
GMBMJ1825-17;Coleoptera;Trixagus leseigneuri;Trixagus leseigneuri;1;Trixagus leseigneuri;1;  
GMBMJ1826-17;Coleoptera;Trixagus carinifrons;Trixagus carinifrons;1;Trixagus carinifrons;1;  
GMBMJ1827-17;Coleoptera;Trixagus carinifrons;Trixagus carinifrons;1;Trixagus carinifrons;1;  
GMBMJ1829-17;Coleoptera;Trixagus leseigneuri;Trixagus leseigneuri;1;Trixagus leseigneuri;1;  
GMBMJ1838-17;Coleoptera;Trixagus carinifrons;Trixagus carinifrons;1;Trixagus carinifrons;1;  
GMBMJ1839-17;Coleoptera;Trixagus leseigneuri;Trixagus leseigneuri;1;Trixagus leseigneuri;1;  
GMBMJ1842-17;Coleoptera;Trixagus leseigneuri;Trixagus leseigneuri;1;Trixagus leseigneuri;1;  
GMBMJ1843-17;Coleoptera;Trixagus carinifrons;Trixagus carinifrons;1;Trixagus carinifrons;1;  
GMBMJ1844-17;Coleoptera;Trixagus leseigneuri;Trixagus leseigneuri;1;Trixagus leseigneuri;1;  
GMBMJ1845-17;Coleoptera;Trixagus leseigneuri;Trixagus leseigneuri;1;Trixagus leseigneuri;1;  
GMBMJ1846-17;Coleoptera;Trixagus leseigneuri;Trixagus leseigneuri;1;Trixagus leseigneuri;1;  
GMBMJ1849-17;Coleoptera;Trixagus carinifrons;Trixagus carinifrons;1;Trixagus carinifrons;1;  
GMBMJ1850-17;Coleoptera;Trixagus carinifrons;Trixagus carinifrons;1;Trixagus carinifrons;1;  
GMBMJ1851-17;Coleoptera;Trixagus carinifrons;Trixagus carinifrons;1;Trixagus carinifrons;1;  
GMBMJ1852-17;Coleoptera;Trixagus carinifrons;Trixagus carinifrons;1;Trixagus carinifrons;1;  
GMBMJ1853-17;Coleoptera;Trixagus carinifrons;Trixagus carinifrons;1;Trixagus carinifrons;1;  
GMBMJ1854-17;Coleoptera;Trixagus carinifrons;Trixagus carinifrons;1;Trixagus carinifrons;1;  
GMBMJ1855-17;Coleoptera;Aulonthroscus brevicollis;Aulonthroscus brevicollis;1;Aulonthroscus brevicollis;1;  
GMBMJ1856-17;Coleoptera;Trixagus carinifrons;Trixagus carinifrons;1;Trixagus carinifrons;1;  
GMBMJ1857-17;Coleoptera;Trixagus carinifrons;Trixagus carinifrons;1;Trixagus carinifrons;1;  
GMBMJ1859-17;Coleoptera;Aulonthroscus brevicollis;Aulonthroscus brevicollis;1;Aulonthroscus brevicollis;1;  
GMBMJ1860-17;Coleoptera;Trixagus carinifrons;Trixagus carinifrons;1;Trixagus carinifrons;1;  
GMBMJ1861-17;Coleoptera;Trixagus carinifrons;Trixagus carinifrons;1;Trixagus carinifrons;1;  
GMBMJ1862-17;Coleoptera;Trixagus carinifrons;Trixagus carinifrons;1;Trixagus carinifrons;1;  
GMBMJ1863-17;Coleoptera;Trixagus carinifrons;Trixagus carinifrons;1;Trixagus carinifrons;1;  
GMBMJ1864-17;Coleoptera;Trixagus carinifrons;Trixagus carinifrons;1;Trixagus carinifrons;1;

[illegible]

[illegible]



GMFID053-12;Coleoptera;Elateroides dermestoides;NA;1;Elateroides dermestoides;1;  
GMFID054-12;Coleoptera;Elateroides dermestoides;Elateroides dermestoides;1;Elateroides  
dermestoides;1;  
GMFID057-12;Coleoptera;Elateroides dermestoides;NA;1;Elateroides dermestoides;1;  
GMFID058-12;Coleoptera;Elateroides dermestoides;NA;1;Elateroides dermestoides;1;  
GMFID061-12;Coleoptera;Elateroides dermestoides;NA;1;Elateroides dermestoides;1;  
GMFID063-12;Coleoptera;Elateroides dermestoides;Elateroides dermestoides;1;Elateroides  
dermestoides;1;  
GMFID064-12;Coleoptera;Elateroides dermestoides;Elateroides dermestoides;1;Elateroides  
dermestoides;1;  
GMFID066-12;Coleoptera;Leptusa pulchella;Leptusa pulchella;1;Leptusa pulchella;1;  
GMFID080-12;Coleoptera;Elateroides dermestoides;NA;1;Elateroides dermestoides;1;  
GMFID082-12;Coleoptera;Elateroides dermestoides;Elateroides dermestoides;1;Elateroides  
dermestoides;1;  
GMFID083-12;Coleoptera;Elateroides dermestoides;Elateroides dermestoides;1;Elateroides  
dermestoides;1;  
GMFID084-12;Coleoptera;Trixagus carinifrons;Trixagus carinifrons;1;Trixagus carinifrons;1;  
GMFIE006-12;Coleoptera;Placusa tachyporoides;Placusa tachyporoides;1;Placusa  
tachyporoides;0.999999996027242;  
GMFIE821-12;Coleoptera;Latridius consimilis;Latridius consimilis;1;Latridius consimilis;1;  
GMFIE823-12;Coleoptera;Elateroides dermestoides;NA;1;Elateroides dermestoides;1;  
GMFIF749-12;Coleoptera;Pteryx suturalis;Pteryx suturalis;1;Pteryx suturalis;1;  
GMFIH280-12;Coleoptera;Euplectus punctatus;Euplectus punctatus;1;Euplectus punctatus;1;  
GMFIK030-12;Coleoptera;Platycerus caprea;Platycerus caprea;1;Platycerus caprea;1;  
GMFIK031-12;Coleoptera;Platycerus caprea;Platycerus caprea;1;Platycerus caprea;1;  
GMFIK032-12;Coleoptera;Platycerus caprea;Platycerus caprea;1;Platycerus caprea;1;  
GMFIK033-12;Coleoptera;Platycerus caprea;Platycerus caprea;1;Platycerus caprea;1;  
GMFIK034-12;Coleoptera;Platycerus caprea;Platycerus caprea;1;Platycerus caprea;1;  
GMFIL010-12;Coleoptera;Platycerus caprea;Platycerus caprea;1;Platycerus caprea;1;  
GMFIL016-12;Coleoptera;Platycerus caprea;Platycerus caprea;1;Platycerus caprea;1;  
GMFIM001-12;Coleoptera;Platycerus caprea;Platycerus caprea;1;Platycerus caprea;1;  
GMFIM210-12;Coleoptera;Epuraea pygmaea;Epuraea pygmaea;1;Epuraea pygmaea;0.999999999999574;  
GMFIM285-13;Coleoptera;Elateroides dermestoides;Elateroides dermestoides;1;Elateroides  
dermestoides;1;  
GMFIN169-12;Coleoptera;Elateroides dermestoides;NA;1;Elateroides dermestoides;1;  
GMFIN170-12;Coleoptera;Elateroides dermestoides;NA;1;Elateroides dermestoides;1;  
GMGMA1532-14;Coleoptera;Xylotrechus arvicola;Xylotrechus arvicola;1;Xylotrechus  
arvicola;0.999999992280607;  
GMGMA1550-14;Coleoptera;Anthaxia nitidula;Anthaxia nitidula;1;Anthaxia  
nitidula;0.999999999999943;  
GMGMC759-14;Coleoptera;Tritoma bipustulata;Tritoma bipustulata;1;Tritoma bipustulata;1;  
GMGMG1182-14;Coleoptera;Trypodendron domesticum;Trypodendron domesticum;1;Trypodendron  
domesticum;1;  
GMGMG1184-14;Coleoptera;Xyleborinus saxesenii;Xyleborinus saxeseni;1;Xyleborinus saxeseni;1;  
GMGMG1187-14;Coleoptera;Ernobius abietis;Ernobius abietis;1;Ernobius abietis;1;  
GMGMG1189-14;Coleoptera;Trypodendron domesticum;Trypodendron domesticum;1;Trypodendron  
domesticum;1;  
GMGMG1192-14;Coleoptera;Xyleborinus saxesenii;Xyleborinus saxeseni;1;Xyleborinus saxeseni;1;  
GMGMG1193-14;Coleoptera;Xyleborinus saxesenii;Xyleborinus saxeseni;1;Xyleborinus saxeseni;1;  
GMGMG1195-14;Coleoptera;Xyleborinus saxesenii;Xyleborinus saxeseni;1;Xyleborinus saxeseni;1;  
GMGMG1201-14;Coleoptera;Xyleborinus saxesenii;Xyleborinus saxeseni;1;Xyleborinus saxeseni;1;  
GMGMG1202-14;Coleoptera;Xyleborinus saxesenii;Xyleborinus saxeseni;1;Xyleborinus saxeseni;1;  
GMGMH1163-14;Coleoptera;Aulonothroscus brevicollis;Aulonothroscus brevicollis;1;Aulonothroscus  
brevicollis;1;  
GMGMH1167-14;Coleoptera;Tritoma bipustulata;Tritoma bipustulata;1;Tritoma bipustulata;1;  
GMGMH1559-14;Coleoptera;Platystomos albinus;Platystomos albinus;1;Platystomos albinus;1;  
GMGMH1563-14;Coleoptera;Platycerus caraboides;Platycerus caraboides;1;Platycerus caraboides;1;  
GMGMH1571-14;Coleoptera;Platystomos albinus;Platystomos albinus;1;Platystomos albinus;1;  
GMGMI262-14;Coleoptera;Platystomos albinus;Platystomos albinus;1;Platystomos albinus;1;  
GMGMJ1375-14;Coleoptera;Trixagus carinifrons;Trixagus carinifrons;1;Trixagus carinifrons;1;  
GMGMJ1500-14;Coleoptera;Xyleborinus saxesenii;Xyleborinus saxeseni;1;Xyleborinus saxeseni;1;  
GMGMJ376-14;Coleoptera;Grammoptera ruficornis;Grammoptera ruficornis;1;Grammoptera ruficornis;1;  
GMGMJ377-14;Coleoptera;Grammoptera ruficornis;Grammoptera ruficornis;1;Grammoptera ruficornis;1;  
GMGMJ869-14;Coleoptera;Denticollis linearis;Denticollis linearis;1;Denticollis linearis;1;  
GMGMJ874-14;Coleoptera;Platystomos albinus;Platystomos albinus;1;Platystomos albinus;1;  
GMGMK1004-14;Coleoptera;Grammoptera ruficornis;Grammoptera ruficornis;1;Grammoptera  
ruficornis;1;  
GMGMK1005-14;Coleoptera;Anthaxia nitidula;Anthaxia nitidula;1;Anthaxia nitidula;1;  
GMGMK1006-14;Coleoptera;Anthaxia nitidula;NA;NA;Anthaxia nitidula;0.999999999997812;  
GMGMK1009-14;Coleoptera;Trixagus carinifrons;Trixagus carinifrons;1;Trixagus carinifrons;1;  
GMGMK1010-14;Coleoptera;Grammoptera ruficornis;NA;NA;Grammoptera ruficornis;1;  
GMGMK1013-14;Coleoptera;Anthaxia nitidula;Anthaxia nitidula;1;Anthaxia  
nitidula;0.999999999997584;  
GMGMK1506-14;Coleoptera;Anthaxia nitidula;Anthaxia nitidula;1;Anthaxia nitidula;1;  
GMGMK1507-14;Coleoptera;Trixagus carinifrons;Trixagus carinifrons;1;Trixagus carinifrons;1;  
GMGMK1508-14;Coleoptera;Anthaxia nitidula;Anthaxia nitidula;1;Anthaxia nitidula;1;  
GMGMK1513-14;Coleoptera;Anthaxia nitidula;Anthaxia nitidula;1;Anthaxia nitidula;1;

GMGMK946-14;Coleoptera;Grammoptera ruficornis;Grammoptera ruficornis;1;Grammoptera ruficornis;1;  
GMGMK954-14;Coleoptera;Xyleborus dryographus;Xyleborus dryographus;1;Xyleborus dryographus;0.99999999999147;  
GMGMK973-14;Coleoptera;Grammoptera ruficornis;Grammoptera ruficornis;1;Grammoptera ruficornis;1;  
GMGMK990-14;Coleoptera;Anthaxia nitidula;Anthaxia nitidula;1;Anthaxia nitidula;0.99999999999972;  
GMGML1294-14;Coleoptera;Anthaxia nitidula;Anthaxia nitidula;1;Anthaxia nitidula;0.99999999999972;  
GMGML1295-14;Coleoptera;Anthaxia nitidula;Anthaxia nitidula;1;Anthaxia nitidula;0.99999999999972;  
GMGML1296-14;Coleoptera;Anthaxia nitidula;Anthaxia nitidula;1;Anthaxia nitidula;1;  
GMGMM1445-14;Coleoptera;Trixagus carinifrons;Trixagus carinifrons;1;Trixagus carinifrons;1;  
GMGMM1447-14;Coleoptera;Anthaxia nitidula;Anthaxia nitidula;1;Anthaxia nitidula;0.99999999999972;  
GMGMM1458-14;Coleoptera;Anthaxia nitidula;Anthaxia nitidula;1;Anthaxia nitidula;1;  
GMGMM1466-14;Coleoptera;Anthaxia nitidula;Anthaxia nitidula;1;Anthaxia nitidula;0.99999999999972;  
GMGMM1484-14;Coleoptera;Anthaxia nitidula;Anthaxia nitidula;1;Anthaxia nitidula;1;  
GMGMN1150-14;Coleoptera;Trixagus carinifrons;Trixagus carinifrons;1;Trixagus carinifrons;1;  
GMGMN772-14;Coleoptera;Anthaxia quadripunctata;Anthaxia quadripunctata;1;Anthaxia quadripunctata;1;  
GMGMN803-14;Coleoptera;Trixagus carinifrons;Trixagus carinifrons;1;Trixagus carinifrons;1;  
GMGMP1922-18;Coleoptera;Placusa tachyporoides;Placusa tachyporoides;1;Placusa tachyporoides;0.99999999829726;  
GMGMP6786-18;Coleoptera;Grammoptera ruficornis;Grammoptera ruficornis;1;Grammoptera ruficornis;1;  
GMGMP7064-18;Coleoptera;Grammoptera ruficornis;NA;NA;Grammoptera ruficornis;1;  
GMGMP7335-18;Coleoptera;Aulonothroscus brevicollis;Aulonothroscus brevicollis;1;Aulonothroscus brevicollis;1;  
GMGMU4995-20;Coleoptera;Hypebaeus flavipes;Hypebaeus flavipes;1;Hypebaeus flavipes;1;  
GMGMSU5060-20;Coleoptera;Trixagus carinifrons;Trixagus carinifrons;1;Trixagus carinifrons;1;  
GMGRA1613-13;Coleoptera;Elateroides dermestoides;NA;1;Elateroides dermestoides;1;  
GMGRC2944-13;Coleoptera;Bibloporus bicolor;Bibloporus bicolor;1;Bibloporus bicolor;0.99999999999602;  
GMGRD1546-13;Coleoptera;Bibloporus bicolor;Bibloporus bicolor;1;Bibloporus bicolor;0.999999999998522;  
GMGRD3652-13;Coleoptera;Atrecus affinis;Atrecus affinis;1;Atrecus affinis;1;  
GMGRE3158-13;Coleoptera;Epuraea terminalis;Epuraea terminalis;1;Epuraea terminalis;0.999839541300684;  
GMGRE3167-13;Coleoptera;Bibloporus bicolor;Bibloporus bicolor;1;Bibloporus bicolor;0.99999999999773;  
GMGRE3186-13;Coleoptera;Bibloporus bicolor;Bibloporus bicolor;1;Bibloporus bicolor;0.99999999997496;  
GMGRG3961-13;Coleoptera;Pteryngium crenatum;Pteryngium crenatum;1;Pteryngium crenatum;1;  
GMGRG3970-13;Coleoptera;Pteryngium crenatum;Pteryngium crenatum;1;Pteryngium crenatum;1;  
GMGRH1959-13;Coleoptera;Anisotoma castanea;Anisotoma castanea;1;Anisotoma castanea;0.99999999999375;  
GMNWD521-14;Coleoptera;Trypodendron domesticum;Trypodendron domesticum;1;Trypodendron domesticum;1;  
GMNWF1974-14;Coleoptera;Trixagus carinifrons;Trixagus carinifrons;1;Trixagus carinifrons;1;  
GMNWF1980-14;Coleoptera;Trixagus carinifrons;Trixagus carinifrons;1;Trixagus carinifrons;1;  
GMNWF2019-14;Coleoptera;Trixagus carinifrons;Trixagus carinifrons;1;Trixagus carinifrons;1;  
GMNWF2029-14;Coleoptera;Trixagus carinifrons;Trixagus carinifrons;1;Trixagus carinifrons;1;  
GMNWG3123-14;Coleoptera;Trixagus carinifrons;Trixagus carinifrons;1;Trixagus carinifrons;1;  
GMNWG3127-14;Coleoptera;Trixagus carinifrons;Trixagus carinifrons;1;Trixagus carinifrons;1;  
GMNWG3131-14;Coleoptera;Trixagus carinifrons;Trixagus carinifrons;1;Trixagus carinifrons;1;  
GMNWG3139-14;Coleoptera;Trixagus carinifrons;Trixagus carinifrons;1;Trixagus carinifrons;1;  
GMNWG3146-14;Coleoptera;Trixagus carinifrons;Trixagus carinifrons;1;Trixagus carinifrons;1;  
GMNWG3148-14;Coleoptera;Trixagus carinifrons;Trixagus carinifrons;1;Trixagus carinifrons;1;  
GMNWG3165-14;Coleoptera;Trixagus carinifrons;Trixagus carinifrons;1;Trixagus carinifrons;1;  
GMNWG3166-14;Coleoptera;Trixagus carinifrons;Trixagus carinifrons;1;Trixagus carinifrons;1;  
GMNWI3224-14;Coleoptera;Trixagus carinifrons;Trixagus carinifrons;1;Trixagus carinifrons;1;  
GMNWI3253-14;Coleoptera;Trixagus carinifrons;Trixagus carinifrons;1;Trixagus carinifrons;1;  
GMNWI3254-14;Coleoptera;Trixagus carinifrons;Trixagus carinifrons;1;Trixagus carinifrons;1;  
GMNWI3261-14;Coleoptera;Trixagus carinifrons;Trixagus carinifrons;1;Trixagus carinifrons;1;  
GMNWI3263-14;Coleoptera;Trixagus carinifrons;Trixagus carinifrons;1;Trixagus carinifrons;1;  
GMNWI3267-14;Coleoptera;Trixagus carinifrons;Trixagus carinifrons;1;Trixagus carinifrons;1;  
GMNWI3287-14;Coleoptera;Trixagus carinifrons;Trixagus carinifrons;1;Trixagus carinifrons;1;  
GMNWI3298-14;Coleoptera;Trixagus carinifrons;Trixagus carinifrons;1;Trixagus carinifrons;1;  
GMNWI3306-14;Coleoptera;Trixagus carinifrons;Trixagus carinifrons;1;Trixagus carinifrons;1;  
GMNWI33048-14;Coleoptera;Trixagus carinifrons;Trixagus carinifrons;1;Trixagus carinifrons;1;  
GMNWI33049-14;Coleoptera;Trixagus carinifrons;Trixagus carinifrons;1;Trixagus carinifrons;1;  
GMNWI33053-14;Coleoptera;Trixagus carinifrons;Trixagus carinifrons;1;Trixagus carinifrons;1;  
GMNWI33061-14;Coleoptera;Trixagus carinifrons;Trixagus carinifrons;1;Trixagus carinifrons;1;  
GMNWK3483-14;Coleoptera;Trixagus carinifrons;Trixagus carinifrons;1;Trixagus carinifrons;1;  
GMNWL2542-14;Coleoptera;Trixagus carinifrons;Trixagus carinifrons;1;Trixagus carinifrons;1;  
GMNWL2590-14;Coleoptera;Trixagus carinifrons;Trixagus carinifrons;1;Trixagus carinifrons;1;  
GMNWL2591-14;Coleoptera;Trixagus carinifrons;Trixagus carinifrons;1;Trixagus carinifrons;1;

GMNWM677-14;Coleoptera;Epuraea terminalis;Epuraea terminalis;1;Epuraea terminalis;0.999969265387654;  
 GMNWM722-14;Coleoptera;Epuraea terminalis;Epuraea terminalis;1;Epuraea terminalis;0.999860710938023;  
 HM422045;Coleoptera;Potamophilus acuminatus;Potamophilus acuminatus;1;Potamophilus acuminatus;1;  
 HM909032;Coleoptera;Anthaxia quadripunctata;Anthaxia quadripunctata;1;Anthaxia quadripunctata;0.999999998992223;  
 HM909034;Coleoptera;Gonotropis dorsalis;Gonotropis dorsalis;1;Gonotropis dorsalis;1;  
 HM909091;Coleoptera;Bitoma crenata;Bitoma crenata;1;Bitoma crenata;1;  
 HM909106;Coleoptera;Xyleborus cryptographus;Xyleborus cryptographus;1;Xyleborus cryptographus;1;  
 HM909112;Coleoptera;Agrilus viridis;Agrilus viridis;1;Agrilus viridis;0.999998600333824;  
 HM909113;Coleoptera;Agrilus viridis;Agrilus viridis;1;Agrilus viridis;0.999999997497753;  
 HM909114;Coleoptera;Agrilus viridis;Agrilus viridis;1;Agrilus viridis;0.999999994963986;  
 HM909115;Coleoptera;Agrilus viridis;Agrilus viridis;1;Agrilus viridis;0.999998600333824;  
 HM909116;Coleoptera;Agrilus viridis;Agrilus viridis;1;Agrilus viridis;0.999998600333824;  
 HM909117;Coleoptera;Agrilus viridis;Agrilus viridis;1;Agrilus viridis;0.999999404104194;  
 HM909118;Coleoptera;Agrilus viridis;Agrilus viridis;1;Agrilus viridis;0.999998212903028;  
 HM909119;Coleoptera;Agrilus viridis;Agrilus viridis;1;Agrilus viridis;0.999999303891926;  
 HM909123;Coleoptera;Agrilus viridis;Agrilus viridis;1;Agrilus viridis;0.999999994963986;  
 HM909126;Coleoptera;Agrilus viridis;Agrilus viridis;NA;NA;0.999999999999994;  
 HM909127;Coleoptera;Agrilus viridis;Agrilus viridis;1;Agrilus viridis;0.999999994963986;  
 HM909128;Coleoptera;Agrilus viridis;Agrilus viridis;1;Agrilus viridis;0.999999994963986;  
 HM909129;Coleoptera;Agrilus viridis;Agrilus viridis;1;Agrilus viridis;0.999999994963986;  
 HM909130;Coleoptera;Agrilus viridis;Agrilus viridis;1;Agrilus viridis;0.999999746205109;  
 HM909131;Coleoptera;Agrilus viridis;Agrilus viridis;1;Agrilus viridis;0.999999620142163;  
 HM909132;Coleoptera;Agrilus viridis;Agrilus viridis;1;Agrilus viridis;0.999999897855337;  
 HM909133;Coleoptera;Agrilus viridis;Agrilus viridis;1;Agrilus viridis;0.999999746205109;  
 HM909134;Coleoptera;Agrilus viridis;Agrilus viridis;1;Agrilus viridis;0.999999886805916;  
 HM909135;Coleoptera;Agrilus viridis;Agrilus viridis;1;Agrilus viridis;0.999999886805916;  
 HM909136;Coleoptera;Agrilus viridis;Agrilus viridis;1;Agrilus viridis;0.999999886805916;  
 HM909137;Coleoptera;Agrilus viridis;Agrilus viridis;1;Agrilus viridis;0.999999886805916;  
 HM909138;Coleoptera;Agrilus viridis;Agrilus viridis;1;Agrilus viridis;0.999999910920625;  
 HM909139;Coleoptera;Agrilus viridis;Agrilus viridis;1;Agrilus viridis;0.999999897855337;  
 HM909140;Coleoptera;Agrilus viridis;Agrilus viridis;1;Agrilus viridis;0.999999897855337;  
 HM909141;Coleoptera;Agrilus viridis;Agrilus viridis;1;Agrilus viridis;0.999999719684649;  
 HM909142;Coleoptera;Agrilus viridis;Agrilus viridis;1;Agrilus viridis;0.999999964495402;  
 HM909143;Coleoptera;Agrilus viridis;Agrilus viridis;NA;Agrilus viridis;0.999999270966963;  
 HM909144;Coleoptera;Agrilus viridis;Agrilus viridis;1;Agrilus viridis;0.999999992684138;  
 HM909145;Coleoptera;Agrilus viridis;Agrilus viridis;1;Agrilus viridis;0.999999993848206;  
 HM909147;Coleoptera;Agrilus viridis;Agrilus viridis;1;Agrilus viridis;0.999999886805916;  
 HM909148;Coleoptera;Agrilus viridis;Agrilus viridis;1;Agrilus viridis;0.999999886805916;  
 HM909149;Coleoptera;Agrilus viridis;Agrilus viridis;1;Agrilus viridis;0.999999897855337;  
 HM909150;Coleoptera;Agrilus viridis;Agrilus viridis;1;Agrilus viridis;0.999999897855337;  
 HM909151;Coleoptera;Agrilus viridis;Agrilus viridis;1;Agrilus viridis;0.999999886805916;  
 HM909152;Coleoptera;Agrilus viridis;Agrilus viridis;1;Agrilus viridis;0.999999886805916;  
 HM909153;Coleoptera;Agrilus viridis;Agrilus viridis;1;Agrilus viridis;0.999999886805916;  
 HM909154;Coleoptera;Agrilus viridis;Agrilus viridis;1;Agrilus viridis;0.999999897855337;  
 HM909155;Coleoptera;Agrilus viridis;Agrilus viridis;1;Agrilus viridis;0.99999970426977;  
 HQ559231;Coleoptera;Dendrophilus pygmaeus;NA;1;Dendrophilus pygmaeus;1;  
 HQ559246;Coleoptera;Platycerus caprea;Meloe violaceus;1;Meloe violaceus;0.999999999999829;  
 HQ563254;Coleoptera;Hylurgops palliatus;Hylurgops palliatus;1;Hylurgops palliatus;1;  
 HQ948251;Coleoptera;Anisotoma humeralis;Anisotoma humeralis;1;Anisotoma humeralis;0.9999999958203;  
 HQ948252;Coleoptera;Cis boleti;Cis boleti;1;Cis boleti;1;  
 HQ948274;Coleoptera;Denticollis linearis;Denticollis linearis;1;Denticollis linearis;1;  
 HQ953298;Coleoptera;Anisotoma humeralis;Anisotoma humeralis;1;Anisotoma humeralis;0.99999999979735;  
 HQ953299;Coleoptera;Epuraea variegata;Epuraea variegata;1;Epuraea variegata;0.999999999840242;  
 HQ953376;Coleoptera;Trixagus leseigneuri;Trixagus leseigneuri;1;Trixagus leseigneuri;1;  
 HQ953393;Coleoptera;Hypnogyra angularis;Hypnogyra glabra;1;Hypnogyra glabra;1;  
 HQ953394;Coleoptera;Atrecus affinis;NA;NA;Atrecus affinis;1;  
 HQ953399;Coleoptera;Euplectus karstenii;Euplectus karstenii;1;Euplectus karstenii;1;  
 HQ953402;Coleoptera;Batrisodes oculatus;Batrisodes oculatus;1;Batrisodes oculatus;0.999999999999943;  
 HQ953403;Coleoptera;Euplectus kirbii;NA;0.323;NA;100.000.000.000.001;  
 HQ953405;Coleoptera;Cis glabratus;Cis glabratus;1;Cis glabratus;1;  
 HQ953429;Coleoptera;Elateroides dermestoides;NA;1;Elateroides dermestoides;1;  
 HQ953479;Coleoptera;Euryusa castanoptera;Euryusa castanoptera;NA;Euryusa castanoptera;1;  
 HQ953481;Coleoptera;Xylostiba bosnica;Xylostiba bosnica;NA;Xylostiba bosnica;1;  
 HQ953484;Coleoptera;Vincenzellus ruficollis;NA;NA;Vincenzellus ruficollis;1;  
 HQ953488;Coleoptera;Phloeonomus punctipennis;Phloeonomus punctipennis;1;Phloeonomus punctipennis;1;  
 HQ953500;Coleoptera;Cis festivus;Orthocis festivus;1;Orthocis festivus;1;  
 HQ953505;Coleoptera;Homalota plana;NA;NA;Homalota plana;1;  
 HQ953511;Coleoptera;Trypodendron domesticum;Trypodendron domesticum;1;Trypodendron domesticum;1;  
 HQ953519;Coleoptera;Placusa tachyporoides;Placusa tachyporoides;1;Placusa tachyporoides;0.999999998163389;  
 HQ953528;Coleoptera;Euplectus piceus;Euplectus piceus;1;Euplectus piceus;1;

HQ953537;Coleoptera;Valgus hemipterus;Valgus hemipterus;1;Valgus hemipterus;1;  
 HQ953597;Coleoptera;Berginus tamarisci;NA;1;Berginus tamarisci;1;  
 HQ953607;Coleoptera;Grammoptera abdominalis;Grammoptera abdominalis;1;Grammoptera abdominalis;1;  
 HQ953626;Coleoptera;Euplectus infirmus;Euplectus infirmus;1;Euplectus infirmus;1;  
 HQ953633;Coleoptera;Bibloporus bicolor;Bibloporus bicolor;1;Bibloporus  
 bicolor;0.99999999999972;  
 HQ953636;Coleoptera;Leptusa fumida;Leptusa fumida;1;Leptusa fumida;1;  
 HQ953665;Coleoptera;Hypebaeus flavipes;Hypebaeus flavipes;1;Hypebaeus flavipes;1;  
 HQ953733;Coleoptera;Tritoma bipustulata;NA;1;Tritoma bipustulata;1;  
 HQ953758;Coleoptera;Pteryngium crenatum;Pteryngium crenatum;1;Pteryngium crenatum;1;  
 HQ953759;Coleoptera;Pteryngium crenatum;Pteryngium crenatum;1;Pteryngium crenatum;1;  
 HQ953783;Coleoptera;Platycerus caraboides;Platycerus caraboides;1;Platycerus caraboides;1;  
 HQ953820;Coleoptera;Plectophloeus erichsoni;Plectophloeus erichsoni;1;Plectophloeus erichsoni;1;  
 HQ953931;Coleoptera;Grammoptera ustulata;Grammoptera ustulata;1;Grammoptera ustulata;1;  
 HQ954002;Coleoptera;Latridius hirtus;Latridius hirtus;NA;Latridius hirtus;1;  
 HQ954006;Coleoptera;Phloeocharis subtilissima;Phloeocharis subtilissima;NA;Phloeocharis  
 subtilissima;1;  
 HQ954007;Coleoptera;Phloeocharis subtilissima;Phloeocharis subtilissima;1;Phloeocharis  
 subtilissima;1;  
 HQ954015;Coleoptera;Tritoma bipustulata;Tritoma bipustulata;1;Tritoma bipustulata;1;  
 HQ954016;Coleoptera;Triplax rufipes;Triplax rufipes;1;Triplax rufipes;1;  
 HQ954017;Coleoptera;Triplax rufipes;Triplax rufipes;1;Triplax rufipes;1;  
 HQ954035;Coleoptera;Euryusa sinuata;Euryusa sinuata;NA;Euryusa sinuata;0.999999999020872;  
 HQ954042;Coleoptera;Latridius pseudominutus;NA;NA;Latridius pseudominutus;0.999806281432518;  
 HQ954043;Coleoptera;Latridius minutus;Latridius minutus;1;Latridius minutus;0.99999999993065;  
 HQ954060;Coleoptera;Anisotoma orbicularis;Anisotoma orbicularis;1;Anisotoma orbicularis;1;  
 HQ954061;Coleoptera;Anisotoma orbicularis;Anisotoma orbicularis;1;Anisotoma orbicularis;1;  
 HQ954074;Coleoptera;Ips sexdentatus;Ips sexdentatus;1;Ips sexdentatus;1;  
 HQ954091;Coleoptera;Globicornis nigripes;Globicornis nigripes;1;Globicornis nigripes;1;  
 HQ954098;Coleoptera;Uloma culinaris;Uloma culinaris;1;Uloma culinaris;1;  
 HQ954193;Coleoptera;Anthaxia quadripunctata;Anthaxia quadripunctata;1;Anthaxia quadripunctata;1;  
 HQ954194;Coleoptera;Anthaxia quadripunctata;Anthaxia quadripunctata;1;Anthaxia quadripunctata;1;  
 HQ954195;Coleoptera;Anthaxia quadripunctata;Anthaxia quadripunctata;1;Anthaxia quadripunctata;1;  
 HQ954214;Coleoptera;Plectophloeus fischeri;Plectophloeus fischeri;1;Plectophloeus fischeri;1;  
 HQ954215;Coleoptera;Plectophloeus fischeri;Plectophloeus fischeri;1;Plectophloeus fischeri;1;  
 HQ954228;Coleoptera;Epuraea rufomarginata;Epuraea rufomarginata;1;Epuraea rufomarginata;1;  
 HQ954230;Coleoptera;Euryusa pipitzi;Euryusa pipitzi;1;Euryusa pipitzi;1;  
 HQ954231;Coleoptera;Philothermus evanescens;Philothermus evanescens;1;Philothermus evanescens;1;  
 HQ954257;Coleoptera;Uloma rufa;Uloma rufa;1;Uloma rufa;1;  
 HQ954261;Coleoptera;Plectophloeus nitidus;Plectophloeus nitidus;1;Plectophloeus nitidus;1;  
 HQ954277;Coleoptera;Leiopus nebulosus;NA;0.12;Leiopus linnei;0.911840242395976;  
 HQ954291;Coleoptera;Anisotoma castanea;Anisotoma castanea;1;Anisotoma  
 castanea;0.999999999997783;  
 HQ954295;Coleoptera;Phloeonomus minimus;Phloeonomus minimus;1;Phloeonomus minimus;1;  
 HQ954319;Coleoptera;Euryusa pipitzi;Euryusa pipitzi;1;Euryusa pipitzi;1;  
 HQ954320;Coleoptera;Cis comptus;Cis comptus;1;Cis comptus;1;  
 HQ954440;Coleoptera;Gnathotrichus materiarius;Gnathotrichus materiarius;1;Gnathotrichus  
 materiarius;1;  
 HQ954453;Coleoptera;Anisotoma humeralis;Anisotoma humeralis;1;Anisotoma  
 humeralis;0.999999999865878;  
 HQ954458;Coleoptera;Anthaxia helvetica;Anthaxia helvetica;1;Anthaxia helvetica;1;  
 HQ954460;Coleoptera;Anthaxia morio;Anthaxia morio;1;Anthaxia morio;1;  
 HQ954462;Coleoptera;Elateroides dermestoides;Elateroides dermestoides;1;Elateroides  
 dermestoides;1;  
 HQ954475;Coleoptera;Glischrochilus quadriguttatus;Glischrochilus quadriguttatus;1;Glischrochilus  
 quadriguttatus;1;  
 HQ954476;Coleoptera;Anthaxia helvetica;Anthaxia helvetica;1;Anthaxia helvetica;1;  
 HQ954521;Coleoptera;Tillus elongatus;NA;NA;Tillus elongatus;1;  
 HQ954522;Coleoptera;Dendrophilus punctatus;NA;1;Dendrophilus punctatus;1;  
 HQ954533;Coleoptera;Anthaxia helvetica;Anthaxia helvetica;1;Anthaxia helvetica;1;  
 HQ954546;Coleoptera;Elateroides dermestoides;Elateroides dermestoides;1;Elateroides  
 dermestoides;1;  
 HQ954549;Coleoptera;Dendrophagus crenatus;NA;1;Dendrophagus crenatus;0.99999999999176;  
 HQ954567;Coleoptera;Hololepta plana;Hololepta plana;1;Hololepta plana;1;  
 HQ954578;Coleoptera;Triplax aenea;Triplax aenea;1;Triplax aenea;1;  
 HQ954581;Coleoptera;Anthaxia helvetica;Anthaxia helvetica;1;Anthaxia helvetica;1;  
 HQ954589;Coleoptera;Gauromes virginea;Gauromes virginea;1;Gauromes virginea;1;  
 HQ954598;Coleoptera;Grammoptera ruficornis;Grammoptera ruficornis;1;Grammoptera ruficornis;1;  
 HQ954600;Coleoptera;Ptilinus pectinicornis;Ptilinus pectinicornis;1;Ptilinus pectinicornis;1;  
 HQ954603;Coleoptera;Bitoma crenata;Bitoma crenata;1;Bitoma crenata;1;  
 HQ954605;Coleoptera;Gauromes virginea;Gauromes virginea;1;Gauromes virginea;1;  
 HQ954607;Coleoptera;Denticollis linearis;Denticollis linearis;1;Denticollis linearis;1;  
 HQ954612;Coleoptera;Grammoptera ruficornis;NA;NA;Grammoptera ruficornis;1;  
 ICRY0026-22;Coleoptera;Gnorimus variabilis;Gnorimus variabilis;1;Gnorimus variabilis;1;  
 ICRY0043-22;Coleoptera;Gnorimus variabilis;Gnorimus variabilis;1;Gnorimus variabilis;1;  
 ICRY0046-22;Coleoptera;Gnorimus variabilis;Gnorimus variabilis;1;Gnorimus variabilis;1;  
 ICRY0047-22;Coleoptera;Gnorimus variabilis;Gnorimus variabilis;1;Gnorimus variabilis;1;  
 JF889475;Coleoptera;Evodinus clathratus;Evodinus clathratus;1;Evodinus clathratus;1;

JF889483;Coleoptera;Bitoma crenata;Bitoma crenata;1;Bitoma crenata;1;  
 JF889486;Coleoptera;Platystomos albinus;NA;NA;Platystomos albinus;1;  
 JF889496;Coleoptera;Glischrochilus quadriguttatus;Glischrochilus quadriguttatus;1;Glischrochilus  
 quadriguttatus;1;  
 JF889509;Coleoptera;Tritoma bipustulata;NA;1;Tritoma bipustulata;1;  
 JF889510;Coleoptera;Anthaxia quadripunctata;Anthaxia quadripunctata;1;Anthaxia quadripunctata;1;  
 JF889529;Coleoptera;Anthaxia helvetica;Anthaxia helvetica;1;Anthaxia helvetica;1;  
 JF889530;Coleoptera;Triplax russica;Triplax russica;1;Triplax russica;1;  
 JF889541;Coleoptera;Plagionotus arcuatus;Plagionotus arcuatus;1;Plagionotus  
 arcuatus;0.99999999385665;  
 JF889544;Coleoptera;Gnorimus nobilis;Gnorimus nobilis;1;Gnorimus nobilis;1;  
 JF889566;Coleoptera;Homophthalmus rugicollis;Dryophilus rugicollis;1;Dryophilus rugicollis;1;  
 JF889567;Coleoptera;Homophthalmus rugicollis;NA;1;Dryophilus rugicollis;1;  
 JF889591;Coleoptera;Placusa atrata;Placusa atrata;1;Placusa atrata;1;  
 JF889605;Coleoptera;Placonotus testaceus;Placonotus testaceus;1;Placonotus testaceus;1;  
 JF889610;Coleoptera;Polygraphus grandiclava;Polygraphus grandiclava;1;Polygraphus  
 grandiclava;0.999999994686647;  
 JF889631;Coleoptera;Gnorimus nobilis;Gnorimus nobilis;1;Gnorimus nobilis;1;  
 JF889662;Coleoptera;Aulonium trisulcum;Aulonium trisulcum;1;Aulonium trisulcum;1;  
 JF889767;Coleoptera;Trixagus obtusus;Trixagus obtusus;1;Trixagus obtusus;1;  
 JF889805;Coleoptera;Anisoxya fuscata;NA;NA;Anisoxya fuscata;1;  
 JF889810;Coleoptera;Uloma culinaris;Uloma culinaris;1;Uloma culinaris;1;  
 JF889811;Coleoptera;Uloma culinaris;Uloma culinaris;1;Uloma culinaris;1;  
 JN262175;Coleoptera;Hemicoelus nitidus;NA;1;Anobium nitidum;1;  
 JN299245;Coleoptera;Cis hispidus;NA;0.317;Cis hispidus;0.99999991378775;  
 JN299251;Coleoptera;Trixagus atticus;Trixagus atticus;1;Trixagus atticus;1;  
 JN299252;Coleoptera;Trixagus obtusus;Trixagus obtusus;1;Trixagus obtusus;1;  
 JN299263;Coleoptera;Exocentrus adpersus;Exocentrus adpersus;1;Exocentrus adpersus;1;  
 JN299264;Coleoptera;Exocentrus adpersus;Exocentrus adpersus;1;Exocentrus adpersus;1;  
 JSBIC178-18;Coleoptera;Anthaxia hungarica;NA;NA;Anthaxia hungarica;1;  
 JX263851;Coleoptera;Polygraphus poligraphus;Polygraphus poligraphus;1;Polygraphus poligraphus;1;  
 JX263874;Coleoptera;Trypodendron domesticum;Trypodendron domesticum;1;Trypodendron domesticum;1;  
 JX626111;Coleoptera;Euplectus infirmus;NA;NA;NA;0.863866703233651;  
 JX626112;Coleoptera;Phloeonomus punctipennis;NA;NA;Paraphloeostiba  
 gayndahensis;0.999851520634078;  
 JX626113;Coleoptera;Phloeonomus punctipennis;NA;NA;Paraphloeostiba  
 gayndahensis;0.999851520634078;  
 JX626114;Coleoptera;Phloeonomus punctipennis;NA;NA;Paraphloeostiba  
 gayndahensis;0.999851520634078;  
 JX626115;Coleoptera;Phloeonomus punctipennis;NA;NA;Paraphloeostiba  
 gayndahensis;0.999851520634078;  
 JX626116;Coleoptera;Phloeonomus punctipennis;NA;NA;Paraphloeostiba  
 gayndahensis;0.999851520634078;  
 JX626117;Coleoptera;Phloeonomus punctipennis;NA;NA;Paraphloeostiba  
 gayndahensis;0.999851520634078;  
 JX626118;Coleoptera;Phloeonomus punctipennis;NA;NA;Paraphloeostiba  
 gayndahensis;0.999851520634078;  
 JX626121;Coleoptera;Phloeonomus punctipennis;Phloeonomus punctipennis;1;NA;0.714368338948055;  
 JX969627;Coleoptera;Herophila tristis;Herophila tristis;1;Herophila tristis;1;  
 KC132742;Coleoptera;Homalota plana;Homalota plana;1;NA;0.742578693066678;  
 KC132825;Coleoptera;Phloeocharis subtilissima;Phloeocharis subtilissima;1;NA;0.999999999999961;  
 KC845472;Coleoptera;Hylastes attenuatus;Hylastes attenuatus;1;Hylastes  
 attenuatus;0.99999999993179;  
 KC845477;Coleoptera;Ips sexdentatus;Ips sexdentatus;NA;Ips sexdentatus;0.999872233445088;  
 KC845495;Coleoptera;Polygraphus grandiclava;Polygraphus grandiclava;1;Polygraphus grandiclava;1;  
 KC845496;Coleoptera;Polygraphus poligraphus;Polygraphus poligraphus;1;Polygraphus poligraphus;1;  
 KC845497;Coleoptera;Polygraphus poligraphus;Polygraphus poligraphus;1;Polygraphus poligraphus;1;  
 KC845498;Coleoptera;Polygraphus poligraphus;Polygraphus poligraphus;1;Polygraphus poligraphus;1;  
 KC845499;Coleoptera;Polygraphus poligraphus;Polygraphus poligraphus;1;Polygraphus poligraphus;1;  
 KC845515;Coleoptera;Tomicus piniperda;NA;NA;Tomicus piniperda;1;  
 KC845516;Coleoptera;Trypodendron lineatum;Trypodendron lineatum;NA;Trypodendron  
 lineatum;0.999999975336181;  
 KC845517;Coleoptera;Trypodendron domesticum;Trypodendron domesticum;1;Trypodendron  
 domesticum;0.999999999996163;  
 KC845519;Coleoptera;Xyleborinus saxesenii;Xyleborinus saxesenii;1;Xyleborinus  
 saxesenii;0.999999956550313;  
 KJ768196;Coleoptera;Agrilus viridis;Agrilus viridis;1;Agrilus viridis;0.999998600333824;  
 KJ961779;Coleoptera;Leptusa fumida;Leptusa fumida;1;Leptusa fumida;1;  
 KJ961810;Coleoptera;Glischrochilus quadripunctatus;Glischrochilus  
 quadripunctatus;1;Glischrochilus quadripunctatus;0.99999919932694;  
 KJ961811;Coleoptera;Anisotoma axillaris;Anisotoma axillaris;1;Anisotoma  
 axillaris;0.999999999942276;  
 KJ961860;Coleoptera;Placusa complanata;Placusa complanata;1;Placusa complanata;1;  
 KJ961988;Coleoptera;Dendrophagus crenatus;NA;1;Dendrophagus crenatus;0.99999999906237;  
 KJ962118;Coleoptera;Bitoma crenata;Bitoma crenata;1;Bitoma crenata;1;  
 KJ962141;Coleoptera;Anisotoma humeralis;Anisotoma humeralis;1;Anisotoma  
 humeralis;0.99999999966832;  
 KJ962176;Coleoptera;Bitoma crenata;Bitoma crenata;1;Bitoma crenata;1;

KJ962257;Coleoptera;Platystomos albinus;NA;NA;Platystomos albinus;1;  
KJ962304;Coleoptera;Glischrochilus quadripunctatus;Glischrochilus  
quadripunctatus;0.001;Glischrochilus quadripunctatus;0.99999973027173;  
KJ962357;Coleoptera;Epuraea unicolor;Epuraea unicolor;1;Epuraea unicolor;0.99999999999972;  
KJ962400;Coleoptera;Placusa tachyporoides;Placusa tachyporoides;1;Placusa  
tachyporoides;0.99999995754933;  
KJ962435;Coleoptera;Cis comptus;Cis comptus;1;Cis comptus;0.99999999999716;  
KJ962449;Coleoptera;Denticollis linearis;Denticollis linearis;1;Denticollis linearis;1;  
KJ962530;Coleoptera;Phaenops cyanea;Phaenops cyanea;1;Phaenops cyanea;0.99999999999886;  
KJ962580;Coleoptera;Atrecus pilicornis;Atrecus pilicornis;1;Atrecus pilicornis;1;  
KJ962596;Coleoptera;Phaenops cyanea;Phaenops cyanea;1;Phaenops cyanea;0.99999999999886;  
KJ962616;Coleoptera;Phaenops cyanea;Phaenops cyanea;1;Phaenops cyanea;0.99999999999886;  
KJ962690;Coleoptera;Anisotoma humeralis;Anisotoma humeralis;1;Anisotoma  
humeralis;0.99999999966633;  
KJ962719;Coleoptera;Phaenops cyanea;Phaenops cyanea;1;Phaenops cyanea;0.99999999999886;  
KJ962721;Coleoptera;Anthaxia quadripunctata;Anthaxia quadripunctata;1;Anthaxia  
quadripunctata;0.99999998992223;  
KJ962762;Coleoptera;Triplax russica;Anidorus nigrinus;1;Anidorus nigrinus;0.99999999999346;  
KJ962798;Coleoptera;Ptilinus fuscus;Ptilinus fuscus;1;Ptilinus fuscus;1;  
KJ962955;Coleoptera;Anisotoma glabra;Anisotoma glabra;1;Anisotoma glabra;1;  
KJ962959;Coleoptera;Tomicus piniperda;NA;NA;Tomicus piniperda;1;  
KJ962975;Coleoptera;Anisotoma humeralis;Anisotoma humeralis;1;Anisotoma  
humeralis;0.9999999995751;  
KJ962986;Coleoptera;Plagionotus arcuatus;Plagionotus arcuatus;1;Plagionotus  
arcuatus;0.99999999542467;  
KJ963023;Coleoptera;Platystomos albinus;NA;NA;Platystomos albinus;1;  
KJ963035;Coleoptera;Hylurgops palliatus;Hylurgops palliatus;1;Hylurgops palliatus;1;  
KJ963054;Coleoptera;Triplax russica;Triplax russica;1;Triplax russica;1;  
KJ963086;Coleoptera;Epuraea silacea;Epuraea silacea;1;Epuraea silacea;1;  
KJ963141;Coleoptera;Glischrochilus hortensis;Glischrochilus hortensis;1;Glischrochilus  
hortensis;1;  
KJ963149;Coleoptera;Leiopus nebulosus;NA;NA;Leiopus nebulosus;0.920372595577046;  
KJ963217;Coleoptera;Platycerus caprea;Platycerus caprea;1;Platycerus caprea;1;  
KJ963243;Coleoptera;Elateroides dermestoides;Elateroides dermestoides;1;Elateroides  
dermestoides;1;  
KJ963293;Coleoptera;Phloeonomus punctipennis;Phloeonomus punctipennis;1;Phloeonomus  
punctipennis;1;  
KJ963449;Coleoptera;Gaurotus virginea;Gaurotus virginea;1;Gaurotus virginea;1;  
KJ963460;Coleoptera;Epuraea rufomarginata;Epuraea rufomarginata;1;Epuraea rufomarginata;1;  
KJ963461;Coleoptera;Anthaxia quadripunctata;Anthaxia quadripunctata;1;Anthaxia  
quadripunctata;0.99999998992223;  
KJ963521;Coleoptera;Anisotoma axillaris;Anisotoma axillaris;1;Anisotoma  
axillaris;0.99999999931191;  
KJ963578;Coleoptera;Cis comptus;Cis comptus;1;Cis comptus;1;  
KJ963632;Coleoptera;Denticollis linearis;Denticollis linearis;1;Denticollis linearis;1;  
KJ963715;Coleoptera;Triplax rufipes;Triplax rufipes;1;Triplax rufipes;1;  
KJ963750;Coleoptera;Glischrochilus quadripunctatus;Glischrochilus  
quadripunctatus;1;Glischrochilus quadripunctatus;0.999993324385826;  
KJ963755;Coleoptera;Exocentrus lusitanus;Exocentrus lusitanus;1;Exocentrus lusitanus;1;  
KJ963831;Coleoptera;Platystomos albinus;NA;NA;Platystomos albinus;1;  
KJ963913;Coleoptera;Ptiliola kunzei;Ptiliola kunzei;1;Ptiliola kunzei;0.99999999992752;  
KJ963915;Coleoptera;Ptiliola kunzei;NA;NA;Ptiliola kunzei;0.99999999999972;  
KJ963987;Coleoptera;Cis comptus;Cis comptus;1;Cis comptus;1;  
KJ964055;Coleoptera;Anisotoma castanea;Anisotoma castanea;1;Anisotoma castanea;0.9999999999892;  
KJ964057;Coleoptera;Anthaxia quadripunctata;Anthaxia quadripunctata;1;Anthaxia  
quadripunctata;0.99999998992223;  
KJ964076;Coleoptera;Epuraea variegata;Epuraea variegata;1;Epuraea variegata;0.99999999840242;  
KJ964190;Coleoptera;Ptilinus fuscus;Ptilinus fuscus;1;Ptilinus fuscus;1;  
KJ964261;Coleoptera;Triplax russica;Triplax russica;1;Triplax russica;1;  
KJ964262;Coleoptera;Triplax aenea;Triplax aenea;1;Triplax aenea;1;  
KJ964373;Coleoptera;Tritoma bipustulata;NA;1;Tritoma bipustulata;1;  
KJ964375;Coleoptera;Homalota plana;NA;NA;Homalota plana;1;  
KJ964393;Coleoptera;Gaurotus virginea;Gaurotus virginea;1;Gaurotus virginea;1;  
KJ964414;Coleoptera;Glischrochilus hortensis;Glischrochilus hortensis;1;Glischrochilus  
hortensis;1;  
KJ964440;Coleoptera;Epuraea silacea;Epuraea silacea;1;Epuraea silacea;1;  
KJ964522;Coleoptera;Epuraea terminalis;Epuraea terminalis;1;Epuraea  
terminalis;0.999999449064925;  
KJ964531;Coleoptera;Atrecus affinis;NA;NA;Atrecus affinis;1;  
KJ964564;Coleoptera;Trypodendron domesticum;Trypodendron domesticum;1;Trypodendron domesticum;1;  
KJ964583;Coleoptera;Leiopus nebulosus;NA;NA;Leiopus nebulosus;0.920372595577046;  
KJ964694;Coleoptera;Tomicus piniperda;Tomicus piniperda;NA;Tomicus piniperda;1;  
KJ964717;Coleoptera;Platycerus caprea;Platycerus caprea;1;Platycerus caprea;1;  
KJ964727;Coleoptera;Tritoma bipustulata;NA;1;Tritoma bipustulata;1;  
KJ964833;Coleoptera;Epuraea unicolor;Epuraea unicolor;1;Epuraea unicolor;0.99999999999972;  
KJ964916;Coleoptera;Epuraea variegata;Epuraea variegata;1;Epuraea variegata;0.99999999840242;  
KJ964924;Coleoptera;Latridius consimilis;Latridius consimilis;1;Latridius consimilis;1;  
KJ965159;Coleoptera;Latridius consimilis;Latridius consimilis;1;Latridius consimilis;1;

KJ965184;Coleoptera;Epuraea rufomarginata;Epuraea rufomarginata;1;Epuraea rufomarginata;1;  
KJ965302;Coleoptera;Anisotoma orbicularis;Anisotoma orbicularis;1;Anisotoma orbicularis;1;  
KJ965313;Coleoptera;Platycerus caprea;Platycerus caprea;1;Platycerus caprea;1;  
KJ965420;Coleoptera;Denticollis linearis;Denticollis linearis;1;Denticollis linearis;1;  
KJ965551;Coleoptera;Epuraea terminalis;Epuraea terminalis;1;Epuraea  
terminalis;0.999999270360273;  
KJ965630;Coleoptera;Xylotrechus antilope;Xylotrechus antilope;1;Xylotrechus antilope;1;  
KJ965679;Coleoptera;Atomaria vespertina;Atomaria vespertina;NA;Atomaria vespertina;1;  
KJ965985;Coleoptera;Cis glabratus;Cis glabratus;1;Cis glabratus;1;  
KJ966084;Coleoptera;Platystomos albinus;NA;NA;Platystomos albinus;1;  
KJ966141;Coleoptera;Homalota plana;NA;NA;Homalota plana;1;  
KJ966197;Coleoptera;Cis dentatus;Cis dentatus;1;Cis dentatus;1;  
KJ966247;Coleoptera;Triplax aenea;Triplax aenea;1;Triplax aenea;1;  
KJ966357;Coleoptera;Lepturobosca virens;Lepturobosca virens;NA;Lepturobosca virens;1;  
KJ966373;Coleoptera;Anisotoma axillaris;Anisotoma axillaris;1;Anisotoma  
axillaris;0.99999999942276;  
KJ966375;Coleoptera;Pteryx suturalis;Pteryx suturalis;NA;Pteryx suturalis;1;  
KJ966407;Coleoptera;Exocentrus lusitanus;Exocentrus lusitanus;1;Exocentrus lusitanus;1;  
KJ966409;Coleoptera;Triplax scutellaris;Orthocladus consobrinus;1;Orthocladus  
consobrinus;0.99999999779263;  
KJ966449;Coleoptera;Epuraea silacea;Epuraea silacea;1;Epuraea silacea;1;  
KJ966452;Coleoptera;Bibloporus minutus;Bibloporus minutus;1;Bibloporus minutus;1;  
KJ966525;Coleoptera;Plagionotus arcuatus;Plagionotus arcuatus;1;Plagionotus  
arcuatus;0.99999999576602;  
KJ966542;Coleoptera;Anoploclera sexguttata;Anoploclera sexguttata;1;Anoploclera sexguttata;1;  
KJ966638;Coleoptera;Euryptilium saxonicum;NA;1;Euryptilium saxonicum;1;  
KJ966653;Coleoptera;Exocentrus lusitanus;Exocentrus lusitanus;1;Exocentrus lusitanus;1;  
KJ966697;Coleoptera;Placusa tachyporoides;Placusa tachyporoides;1;Placusa  
tachyporoides;0.99999995754933;  
KJ966706;Coleoptera;Trypodendron domesticum;Trypodendron domesticum;1;Trypodendron domesticum;1;  
KJ966717;Coleoptera;Lepturobosca virens;Lepturobosca virens;NA;Lepturobosca virens;1;  
KJ966743;Coleoptera;Platycerus caprea;Platycerus caprea;1;Platycerus caprea;1;  
KJ966781;Coleoptera;Cis castaneus;Cis nitidus;1;Cis nitidus;0.99999999999204;  
KJ966783;Coleoptera;Epuraea silacea;Epuraea silacea;1;Epuraea silacea;1;  
KJ966886;Coleoptera;Triplax russica;Triplax russica;1;Triplax russica;1;  
KJ966890;Coleoptera;Ptilinus fuscus;Ptilinus fuscus;1;Ptilinus fuscus;1;  
KJ966901;Coleoptera;Triplax russica;Triplax russica;1;Triplax russica;1;  
KJ966914;Coleoptera;Anisotoma glabra;Anisotoma glabra;1;Anisotoma glabra;1;  
KJ966952;Coleoptera;Plagionotus arcuatus;Plagionotus arcuatus;1;Plagionotus  
arcuatus;0.99999999777685;  
KJ967008;Coleoptera;Leiopus nebulosus;NA;0.122;Leiopus nebulosus;0.950639243882467;  
KJ967020;Coleoptera;Anisotoma glabra;Anisotoma glabra;1;Anisotoma glabra;1;  
KJ967104;Coleoptera;Anthaxia quadripunctata;Anthaxia quadripunctata;1;Anthaxia  
quadripunctata;0.99999998992223;  
KJ967194;Coleoptera;Elateroides dermestoides;Elateroides dermestoides;1;Elateroides  
dermestoides;1;  
KJ967222;Coleoptera;Elateroides dermestoides;Elateroides dermestoides;1;Elateroides  
dermestoides;1;  
KJ967231;Coleoptera;Lepturobosca virens;Lepturobosca virens;NA;Lepturobosca virens;1;  
KJ967299;Coleoptera;Plagionotus detritus;Plagionotus detritus;1;Plagionotus  
detritus;0.99999998971703;  
KJ967318;Coleoptera;Trixagus carinifrons;Trixagus carinifrons;1;Trixagus carinifrons;1;  
KJ967320;Coleoptera;Leiopus nebulosus;NA;NA;Leiopus nebulosus;0.933011854612307;  
KJ967373;Coleoptera;Anisotoma glabra;Anisotoma glabra;1;Anisotoma glabra;1;  
KJ967406;Coleoptera;Platystomos albinus;NA;NA;Platystomos albinus;1;  
KJ967452;Coleoptera;Denticollis linearis;Denticollis linearis;1;Denticollis linearis;1;  
KJ967467;Coleoptera;Triplax rufipes;Triplax rufipes;1;Triplax rufipes;1;  
KM285757;Coleoptera;Tillus elongatus;NA;NA;Tillus elongatus;1;  
KM285777;Coleoptera;Gnorimus variabilis;Gnorimus variabilis;1;Gnorimus variabilis;1;  
KM285787;Coleoptera;Xyleborus monographus;Xyleborus monographus;1;Xyleborus  
monographus;0.99999999999858;  
KM285789;Coleoptera;Tropideres albirostris;Tropideres albirostris;1;Tropideres albirostris;1;  
KM285815;Coleoptera;Plagionotus arcuatus;Plagionotus arcuatus;1;Plagionotus  
arcuatus;0.99999995534239;  
KM285820;Coleoptera;Hypoganus inunctus;Hypoganus inunctus;1;Hypoganus inunctus;1;  
KM285829;Coleoptera;Grammoptera ustulata;Grammoptera ustulata;1;Grammoptera ustulata;1;  
KM285854;Coleoptera;Hemicoelus fulvicornis;NA;NA;Anobium fulvicorne;1;  
KM285858;Coleoptera;Trypodendron domesticum;Trypodendron domesticum;1;Trypodendron domesticum;1;  
KM285864;Coleoptera;Plagionotus arcuatus;Plagionotus arcuatus;1;Plagionotus  
arcuatus;0.99999995534239;  
KM285865;Coleoptera;Anisandrus dispar;Anisandrus dispar;1;Anisandrus dispar;1;  
KM285873;Coleoptera;Hymenalia rufipes;Hymenalia rufipes;NA;Hymenalia rufipes;1;  
KM285894;Coleoptera;Phaenops formanekei;Phaenops formanekei;1;Phaenops formanekei;1;  
KM285906;Coleoptera;Triplax lepida;Triplax lepida;1;Triplax lepida;1;  
KM285921;Coleoptera;Platystomos albinus;NA;NA;Platystomos albinus;1;  
KM285932;Coleoptera;Platystomos albinus;NA;NA;Platystomos albinus;1;  
KM285945;Coleoptera;Hypulus quercinus;Hypulus quercinus;1;Hypulus quercinus;1;  
KM285950;Coleoptera;Tillus elongatus;Tillus elongatus;1;Tillus elongatus;0.99999999999886;

KM285958;Coleoptera;Xyleborinus saxesenii;Xyleborinus saxeseni;1;Xyleborinus saxeseni;1;  
KM285961;Coleoptera;Xyleborinus saxesenii;Xyleborinus saxeseni;1;Xyleborinus  
saxeseni;0.99999999999972;  
KM285986;Coleoptera;Ptilinus fuscus;Ptilinus fuscus;1;Ptilinus fuscus;1;  
KM285992;Coleoptera;Elateroidea dermestoides;Elateroidea dermestoides;1;Elateroidea  
dermestoides;1;  
KM285995;Coleoptera;Xyleborus monographus;Xyleborus monographus;1;Xyleborus  
monographus;0.999999999999744;  
KM285996;Coleoptera;Tillus elongatus;Tillus elongatus;NA;Tillus elongatus;0.999999931515733;  
KM286027;Coleoptera;Grammoptera abdominalis;Grammoptera abdominalis;1;Grammoptera abdominalis;1;  
KM286028;Coleoptera;Denticollis linearis;Denticollis linearis;1;Denticollis  
linearis;0.99999999999972;  
KM286039;Coleoptera;Anisotoma humeralis;Anisotoma humeralis;1;Anisotoma  
humeralis;0.99999999953076;  
KM286049;Coleoptera;Ptilinus pectinicornis;Ptilinus pectinicornis;1;Ptilinus pectinicornis;1;  
KM286059;Coleoptera;Exocentrus adspersus;Exocentrus adspersus;1;Exocentrus adspersus;1;  
KM286060;Coleoptera;Anisotoma humeralis;Anisotoma humeralis;1;Anisotoma  
humeralis;0.99999999979735;  
KM286061;Coleoptera;Xestobium rufovillosum;NA;1;Xestobium rufovillosum;1;  
KM286071;Coleoptera;Tillus elongatus;Tillus elongatus;1;Tillus elongatus;1;  
KM286084;Coleoptera;Evodinus clathratus;Evodinus clathratus;1;Evodinus  
clathratus;0.99999999999858;  
KM286085;Coleoptera;Xyleborus dryographus;Xyleborus dryographus;1;Xyleborus  
dryographus;0.99999999999602;  
KM286090;Coleoptera;Leptura aurulenta;Leptura aurulenta;1;Leptura aurulenta;1;  
KM286097;Coleoptera;Exocentrus lusitanus;Exocentrus lusitanus;1;Exocentrus lusitanus;1;  
KM286103;Coleoptera;Xyleborus dryographus;Xyleborus dryographus;1;Xyleborus  
dryographus;0.99999999999602;  
KM286119;Coleoptera;Prinobius myardi;Prinobius myardi;NA;Prinobius myardi;0.999999989951107;  
KM286134;Coleoptera;Trypodendron domesticum;Trypodendron domesticum;1;Trypodendron domesticum;1;  
KM286136;Coleoptera;Grynocharis oblonga;NA;1;Grynocharis oblonga;1;  
KM286137;Coleoptera;Xyleborus monographus;Xyleborus monographus;1;Xyleborus  
monographus;0.99999999999972;  
KM286147;Coleoptera;Hylastes angustatus;Hylastes angustatus;1;Hylastes angustatus;1;  
KM286150;Coleoptera;Grammoptera ruficornis;Grammoptera ruficornis;1;Grammoptera ruficornis;1;  
KM286155;Coleoptera;Anisandrus dispar;Anisandrus dispar;1;Anisandrus dispar;1;  
KM286157;Coleoptera;Hylastes attenuatus;Hylastes attenuatus;1;Hylastes  
attenuatus;0.99999999998423;  
KM286158;Coleoptera;Hypoganus inunctus;Hypoganus inunctus;1;Hypoganus inunctus;1;  
KM286179;Coleoptera;Hemicolus nitidus;NA;1;Anobium nitidum;1;  
KM286193;Coleoptera;Hylastes attenuatus;Hylastes attenuatus;1;Hylastes attenuatus;1;  
KM286214;Coleoptera;Xyleborus monographus;Xyleborus monographus;1;Xyleborus  
monographus;0.99999999999915;  
KM286232;Coleoptera;Hypulus quercinus;Hypulus quercinus;1;Hypulus quercinus;1;  
KM286240;Coleoptera;Zilora obscura;Zilora obscura;NA;Zilora obscura;1;  
KM286242;Coleoptera;Xyleborus monographus;Xyleborus monographus;1;Xyleborus  
monographus;0.99999999999915;  
KM286261;Coleoptera;Eucnemis capucina;Eucnemis capucina;1;Eucnemis capucina;1;  
KM286270;Coleoptera;Ptilinus pectinicornis;Ptilinus pectinicornis;1;Ptilinus  
pectinicornis;0.99999999999972;  
KM286279;Coleoptera;Gnorimus nobilis;Gnorimus nobilis;1;Gnorimus nobilis;1;  
KM286288;Coleoptera;Etorofus pubescens;Etorofus pubescens;1;Etorofus pubescens;1;  
KM286293;Coleoptera;Tritoma bipustulata;NA;1;Tritoma bipustulata;1;  
KM286296;Coleoptera;Lepturobosca virens;Lepturobosca virens;1;Lepturobosca virens;1;  
KM286312;Coleoptera;Anoplodera sexguttata;Anoplodera sexguttata;1;Anoplodera sexguttata;1;  
KM286364;Coleoptera;Xyleborinus saxesenii;Xyleborinus saxeseni;1;Xyleborinus  
saxeseni;0.99999999999972;  
KM286366;Coleoptera;Vincenzellus ruficollis;NA;NA;Vincenzellus ruficollis;0.999999999995921;  
KM286378;Coleoptera;Ptilinus pectinicornis;Ptilinus pectinicornis;1;Ptilinus pectinicornis;1;  
KM286381;Coleoptera;Anisandrus dispar;Anisandrus dispar;1;Anisandrus dispar;0.99999999999787;  
KM286393;Coleoptera;Hypoganus inunctus;Hypoganus inunctus;1;Hypoganus inunctus;1;  
KM439130;Coleoptera;Hesperus rufipennis;Hesperus rufipennis;1;Hesperus rufipennis;1;  
KM439151;Coleoptera;Leptoplectus spinolae;Leptoplectus spinolae;1;Leptoplectus spinolae;1;  
KM439192;Coleoptera;Exocentrus adspersus;Exocentrus adspersus;1;Exocentrus adspersus;1;  
KM439195;Coleoptera;Platystomos albinus;Platystomos albinus;1;Platystomos albinus;1;  
KM439208;Coleoptera;Grammoptera ruficornis;Grammoptera ruficornis;1;Grammoptera ruficornis;1;  
KM439226;Coleoptera;Dendrophilus pygmaeus;Dendrophilus pygmaeus;1;Dendrophilus pygmaeus;1;  
KM439289;Coleoptera;Trixagus obtusus;Trixagus obtusus;1;Trixagus obtusus;1;  
KM439292;Coleoptera;Gaurotus virginea;Gaurotus virginea;NA;Gaurotus virginea;1;  
KM439323;Coleoptera;Bibloporus minutus;Bibloporus minutus;1;Bibloporus  
minutus;0.99999999999972;  
KM439328;Coleoptera;Aulonothroscus brevicollis;Aulonothroscus brevicollis;1;Aulonothroscus  
brevicollis;1;  
KM439345;Coleoptera;Anthaxia candens;Anthaxia candens;1;Anthaxia candens;1;  
KM439348;Coleoptera;Trypodendron domesticum;Trypodendron domesticum;1;Trypodendron domesticum;1;  
KM439349;Coleoptera;Denticollis linearis;Denticollis linearis;1;Denticollis linearis;1;  
KM439373;Coleoptera;Epuraea unicolor;Epuraea unicolor;1;Epuraea unicolor;0.99999999999972;  
KM439387;Coleoptera;Hymenalia rufipes;Hymenalia rufipes;NA;Hymenalia rufipes;1;



KM439418;Coleoptera;Euryusa optabilis;Euryusa optabilis;1;Euryusa optabilis;0.999999999941679;  
KM439430;Coleoptera;Leiopus nebulosus;NA;0.12;Leiopus linnei;0.911840242395976;  
KM439494;Coleoptera;Plectophloeus nubigena;Plectophloeus nubigena;1;Plectophloeus nubigena;1;  
KM439519;Coleoptera;Hesperus rufipennis;Hesperus rufipennis;1;Hesperus rufipennis;1;  
KM439597;Coleoptera;Trixagus carinifrons;Trixagus carinifrons;1;Trixagus carinifrons;1;  
KM439599;Coleoptera;Atrecus affinis;NA;NA;Atrecus affinis;1;  
KM439610;Coleoptera;Placusa pumilio;Placusa pumilio;1;Placusa pumilio;1;  
KM439634;Coleoptera;Euplectus nanus;NA;0.048;NA;0.999999999999987;  
KM439635;Coleoptera;Triplax russica;Triplax russica;1;Triplax russica;1;  
KM439643;Coleoptera;Anoplodera sexguttata;Anoplodera sexguttata;1;Anoplodera sexguttata;1;  
KM439679;Coleoptera;Potamophilus acuminatus;Potamophilus acuminatus;NA;Potamophilus  
acuminatus;1;  
KM439693;Coleoptera;Platystomos albinus;NA;NA;Platystomos albinus;1;  
KM439774;Coleoptera;Philothermus evanescens;NA;1;Philothermus evanescens;1;  
KM439798;Coleoptera;Uloma rufa;Uloma rufa;1;Uloma rufa;1;  
KM439800;Coleoptera;Valgus hemipterus;Valgus hemipterus;1;Valgus hemipterus;1;  
KM439851;Coleoptera;Epuraea unicolor;Epuraea unicolor;1;Epuraea unicolor;0.999999999999972;  
KM439901;Coleoptera;Cis hispidus;NA;0.317;Cis hispidus;0.99999991378775;  
KM439965;Coleoptera;Tritoma bipustulata;NA;1;Tritoma bipustulata;1;  
KM439969;Coleoptera;Denticollis linearis;Denticollis linearis;1;Denticollis linearis;1;  
KM439972;Coleoptera;Anisotoma humeralis;Anisotoma humeralis;1;Anisotoma  
humeralis;0.999999999979735;  
KM439982;Coleoptera;Ptilinus pectinicornis;Ptilinus pectinicornis;1;Ptilinus  
pectinicornis;0.999999999999943;  
KM440013;Coleoptera;Phloeocharis subtilissima;Phloeocharis subtilissima;NA;Phloeocharis  
subtilissima;1;  
KM440017;Coleoptera;Polygraphus grandiclava;Polygraphus grandiclava;1;Polygraphus  
grandiclava;0.999999987585937;  
KM440036;Coleoptera;Xyleborus dryographus;Xyleborus dryographus;1;Xyleborus  
dryographus;0.999999999150049;  
KM440075;Coleoptera;Phloeonomus punctipennis;Phloeonomus punctipennis;1;Phloeonomus  
punctipennis;1;  
KM440078;Coleoptera;Latridius minutus;Latridius minutus;1;Latridius minutus;0.999999999993065;  
KM440085;Coleoptera;Anthaxia candens;Anthaxia candens;1;Anthaxia candens;1;  
KM440092;Coleoptera;Valgus hemipterus;Valgus hemipterus;1;Valgus hemipterus;1;  
KM440150;Coleoptera;Philothermus evanescens;Philothermus evanescens;1;Philothermus evanescens;1;  
KM440161;Coleoptera;Anthaxia helvetica;Anthaxia helvetica;1;Anthaxia helvetica;1;  
KM440169;Coleoptera;Uloma rufa;Uloma rufa;1;Uloma rufa;1;  
KM440171;Coleoptera;Uloma culinaris;Uloma culinaris;1;Uloma culinaris;1;  
KM440191;Coleoptera;Cis glabratus;Cis glabratus;1;Cis glabratus;1;  
KM440209;Coleoptera;Pteryngium crenatum;Pteryngium crenatum;1;Pteryngium crenatum;1;  
KM440229;Coleoptera;Exocentrus adpersus;Exocentrus adpersus;1;Exocentrus adpersus;1;  
KM440253;Coleoptera;Placusa depressa;Placusa depressa;1;Placusa depressa;0.9999933037358;  
KM440262;Coleoptera;Batrisus formicarius;Batrisus formicarius;1;Batrisus formicarius;1;  
KM440269;Coleoptera;Anthaxia quadripunctata;Anthaxia quadripunctata;1;Anthaxia quadripunctata;1;  
KM440278;Coleoptera;Epuraea rufomarginata;Epuraea rufomarginata;1;Epuraea  
rufomarginata;0.999999999999829;  
KM440283;Coleoptera;Uloma culinaris;Uloma culinaris;1;Uloma culinaris;1;  
KM440319;Coleoptera;Hesperus rufipennis;Hesperus rufipennis;1;Hesperus rufipennis;1;  
KM440321;Coleoptera;Cis glabratus;Cis glabratus;1;Cis glabratus;1;  
KM440331;Coleoptera;Polygraphus grandiclava;Polygraphus grandiclava;1;Polygraphus  
grandiclava;0.999999989897674;  
KM440348;Coleoptera;Placusa depressa;Placusa depressa;1;Placusa depressa;0.999999998185473;  
KM440379;Coleoptera;Hypnogyra angularis;Hypnogyra glabra;1;Hypnogyra glabra;1;  
KM440380;Coleoptera;Glischrochilus quadripunctatus;Glischrochilus  
quadripunctatus;0.02;Glischrochilus quadripunctatus;0.999999898249092;  
KM440395;Coleoptera;Agrilus viridis;Agrilus viridis;1;Agrilus viridis;0.999999816014269;  
KM440408;Coleoptera;Placusa tachyporoides;Placusa tachyporoides;1;Placusa  
tachyporoides;0.999999995754933;  
KM440415;Coleoptera;Tomicus piniperda;NA;NA;Tomicus piniperda;1;  
KM440465;Coleoptera;Phloeonomus punctipennis;Phloeonomus punctipennis;1;Phloeonomus  
punctipennis;1;  
KM440476;Coleoptera;Xestobium rufovillosum;NA;1;Xestobium rufovillosum;1;  
KM440485;Coleoptera;Hypulus quercinus;Hypulus quercinus;1;Hypulus quercinus;1;  
KM440600;Coleoptera;Anthaxia quadripunctata;Anthaxia quadripunctata;1;Anthaxia quadripunctata;1;  
KM440605;Coleoptera;Ptiliolum caledonicum;Ptiliolum caledonicum;1;Ptiliolum caledonicum;1;  
KM440623;Coleoptera;Berginus tamarisci;NA;1;Berginus tamarisci;1;  
KM440628;Coleoptera;Euryusa optabilis;Euryusa optabilis;1;Euryusa optabilis;0.999999999908795;  
KM440639;Coleoptera;Trypodendron domesticum;Trypodendron domesticum;1;Trypodendron domesticum;1;  
KM440666;Coleoptera;Platystomos albinus;NA;NA;Platystomos albinus;1;  
KM440681;Coleoptera;Plectophloeus nubigena;Plectophloeus nubigena;1;Plectophloeus nubigena;1;  
KM440702;Coleoptera;Xylostiba bosnica;Xylostiba bosnica;NA;Xylostiba bosnica;1;  
KM440746;Coleoptera;Pteryx suturalis;NA;NA;Pteryx suturalis;1;  
KM440784;Coleoptera;Uloma culinaris;Uloma culinaris;1;Uloma culinaris;1;  
KM440786;Coleoptera;Denticollis linearis;Denticollis linearis;1;Denticollis linearis;1;  
KM440802;Coleoptera;Plectophloeus nitidus;Plectophloeus nitidus;1;Plectophloeus nitidus;1;  
KM440806;Coleoptera;Euplectus nanus;NA;NA;Euplectus nanus;0.715342734986947;

KM440811;Coleoptera;Glischrochilus quadriguttatus;Glischrochilus quadriguttatus;1;Glischrochilus quadriguttatus;1;  
 KM440836;Coleoptera;Plectophloeus nitidus;Plectophloeus nitidus;1;Plectophloeus nitidus;1;  
 KM440844;Coleoptera;Uloma rufa;Uloma rufa;1;Uloma rufa;1;  
 KM440850;Coleoptera;Dendrophilus pygmaeus;Dendrophilus pygmaeus;1;Dendrophilus pygmaeus;1;  
 KM440871;Coleoptera;Epuraea thoracica;Epuraea thoracica;1;Epuraea thoracica;0.999982218697291;  
 KM440887;Coleoptera;Hypebaeus flavipes;Hypebaeus flavipes;1;Hypebaeus flavipes;1;  
 KM440894;Coleoptera;Epuraea unicolor;Epuraea unicolor;1;Epuraea unicolor;0.999999999999972;  
 KM440903;Coleoptera;Philothermus evanescens;NA;1;Philothermus evanescens;1;  
 KM440911;Coleoptera;Epuraea thoracica;Epuraea thoracica;1;Epuraea thoracica;0.999989250075486;  
 KM440986;Coleoptera;Evodinus clathratus;Evodinus clathratus;1;Evodinus clathratus;1;  
 KM441027;Coleoptera;Gaurotus virginea;Gaurotus virginea;1;Gaurotus virginea;1;  
 KM441090;Coleoptera;Leptusa fumida;Leptusa fumida;1;Leptusa fumida;1;  
 KM441091;Coleoptera;Pteryx suturalis;NA;NA;Pteryx suturalis;1;  
 KM441107;Coleoptera;Plagionotus detritus;Plagionotus detritus;1;Plagionotus detritus;0.999999999661156;  
 KM441115;Coleoptera;Plectophloeus nubigena;Plectophloeus nubigena;1;Plectophloeus nubigena;1;  
 KM441125;Coleoptera;Epuraea unicolor;Epuraea unicolor;1;Epuraea unicolor;1;  
 KM441126;Coleoptera;Uloma rufa;Uloma rufa;1;Uloma rufa;1;  
 KM441127;Coleoptera;Euplectus kirbii;NA;0.166;Euplectus kirbyi;0.978419763277652;  
 KM441149;Coleoptera;Euryusa optabilis;Euryusa optabilis;1;Euryusa optabilis;0.99999999997533;  
 KM441197;Coleoptera;Anthaxia quadripunctata;Anthaxia quadripunctata;1;Anthaxia quadripunctata;1;  
 KM441229;Coleoptera;Trixagus obtusus;Trixagus obtusus;1;Trixagus obtusus;1;  
 KM441236;Coleoptera;Lepturobosca virens;Lepturobosca virens;1;Lepturobosca virens;1;  
 KM441239;Coleoptera;Anthaxia mendizabali;Anthaxia mendizabali;1;Anthaxia mendizabali;1;  
 KM441284;Coleoptera;Anthaxia istriana;Anthaxia istriana;1;Anthaxia istriana;1;  
 KM441311;Coleoptera;Lepturobosca virens;Lepturobosca virens;1;Lepturobosca virens;1;  
 KM441350;Coleoptera;Anthaxia mendizabali;Anthaxia mendizabali;1;Anthaxia mendizabali;1;  
 KM441353;Coleoptera;Anthaxia fulgurans;NA;NA;Anthaxia fulgurans;1;  
 KM441402;Coleoptera;Hypebaeus flavipes;Hypebaeus flavipes;1;Hypebaeus flavipes;0.999999999999858;  
 KM441405;Coleoptera;Euplectus punctatus;Euplectus punctatus;1;Euplectus punctatus;1;  
 KM441443;Coleoptera;Euryusa castanoptera;Euryusa castanoptera;NA;Euryusa castanoptera;1;  
 KM441559;Coleoptera;Euryusa optabilis;Euryusa optabilis;1;Euryusa optabilis;0.999999999966349;  
 KM441579;Coleoptera;Epuraea variegata;Epuraea variegata;1;Epuraea variegata;0.999999999941821;  
 KM441583;Coleoptera;Anthaxia candens;Anthaxia candens;1;Anthaxia candens;1;  
 KM441599;Coleoptera;Euryusa castanoptera;Euryusa castanoptera;NA;Euryusa castanoptera;1;  
 KM441622;Coleoptera;Glischrochilus quadriguttatus;Glischrochilus quadriguttatus;1;Glischrochilus quadriguttatus;1;  
 KM441633;Coleoptera;Tomicus piniperda;NA;NA;Tomicus piniperda;1;  
 KM441637;Coleoptera;Plectophloeus fischeri;Plectophloeus fischeri;1;Plectophloeus fischeri;1;  
 KM441693;Coleoptera;Bibloporus bicolor;Bibloporus bicolor;1;Bibloporus bicolor;0.999999999999574;  
 KM441700;Coleoptera;Cis comptus;Cis comptus;1;Cis comptus;1;  
 KM441702;Coleoptera;Ernobius abietinus;Ernobius abietinus;1;Ernobius abietinus;1;  
 KM441727;Coleoptera;Anthaxia quadripunctata;Anthaxia quadripunctata;1;Anthaxia quadripunctata;1;  
 KM441734;Coleoptera;Anthaxia istriana;Anthaxia istriana;1;Anthaxia istriana;1;  
 KM441761;Coleoptera;Hymenalia rufipes;Hymenalia rufipes;1;Hymenalia rufipes;1;  
 KM441773;Coleoptera;Dendrophilus pygmaeus;Dendrophilus pygmaeus;1;Dendrophilus pygmaeus;1;  
 KM441788;Coleoptera;Homalota plana;Homalota plana;NA;Homalota plana;1;  
 KM441833;Coleoptera;Euplectus kirbii;NA;0.124;NA;1;  
 KM441862;Coleoptera;Plectophloeus nubigena;Plectophloeus nubigena;1;Plectophloeus nubigena;1;  
 KM441898;Coleoptera;Placusa pumilio;Placusa pumilio;1;Placusa pumilio;1;  
 KM441908;Coleoptera;Glischrochilus quadriguttatus;Glischrochilus quadriguttatus;1;Glischrochilus quadriguttatus;1;  
 KM441926;Coleoptera;Euplectus infirmus;Euplectus infirmus;1;Euplectus infirmus;1;  
 KM441934;Coleoptera;Uloma culinaris;Uloma culinaris;1;Uloma culinaris;1;  
 KM441946;Coleoptera;Atrecus affinis;Atrecus affinis;1;Atrecus affinis;1;  
 KM441984;Coleoptera;Anthaxia salicis;Anthaxia salicis;1;Anthaxia salicis;1;  
 KM441987;Coleoptera;Dendrophilus pygmaeus;Dendrophilus pygmaeus;1;Dendrophilus pygmaeus;1;  
 KM441997;Coleoptera;Exocentrus adspersus;NA;NA;Exocentrus adspersus;1;  
 KM442016;Coleoptera;Cis glabratus;Cis glabratus;1;Cis glabratus;1;  
 KM442021;Coleoptera;Hypoganus inunctus;Hypoganus inunctus;1;Hypoganus inunctus;1;  
 KM442034;Coleoptera;Euryusa optabilis;Euryusa optabilis;1;Euryusa optabilis;0.99999999997533;  
 KM442051;Coleoptera;Trixagus carinifrons;Trixagus carinifrons;1;Trixagus carinifrons;1;  
 KM442072;Coleoptera;Cis dentatus;Cis dentatus;1;Cis dentatus;1;  
 KM442098;Coleoptera;Trypodendron domesticum;Trypodendron domesticum;1;Trypodendron domesticum;1;  
 KM442130;Coleoptera;Exocentrus adspersus;Exocentrus adspersus;1;Exocentrus adspersus;1;  
 KM442141;Coleoptera;Plectophloeus nitidus;Plectophloeus nitidus;1;Plectophloeus nitidus;1;  
 KM442161;Coleoptera;Troglops albicans;Troglops albicans;NA;Troglops albicans;1;  
 KM442177;Coleoptera;Plagionotus detritus;Plagionotus detritus;1;Plagionotus detritus;0.999999998971703;  
 KM442198;Coleoptera;Leptusa pulchella;Leptusa pulchella;1;Leptusa pulchella;1;  
 KM442208;Coleoptera;Polygraphus poligraphus;Polygraphus poligraphus;1;Polygraphus poligraphus;0.99999999993719;  
 KM442239;Coleoptera;Triplax rufipes;Triplax rufipes;1;Triplax rufipes;1;  
 KM442307;Coleoptera;Hypoganus inunctus;Hypoganus inunctus;1;Hypoganus inunctus;1;  
 KM442312;Coleoptera;Tritoma bipustulata;NA;1;Tritoma bipustulata;1;

KM442328;Coleoptera;Hypnogyra angularis;Hypnogyra glabra;1;Hypnogyra glabra;1;  
 KM442418;Coleoptera;Anthaxia quadripunctata;Anthaxia quadripunctata;1;Anthaxia quadripunctata;1;  
 KM442425;Coleoptera;Gnorimus variabilis;Gnorimus variabilis;1;Gnorimus variabilis;1;  
 KM442468;Coleoptera;Grammoptera ustulata;Grammoptera ustulata;1;Grammoptera ustulata;1;  
 KM442472;Coleoptera;Aulonothroscus brevicollis;Aulonothroscus brevicollis;1;Aulonothroscus brevicollis;1;  
 KM442520;Coleoptera;Cis dentatus;Cis dentatus;1;Cis dentatus;1;  
 KM442531;Coleoptera;Anisotoma orbicularis;Anisotoma orbicularis;1;Anisotoma orbicularis;1;  
 KM442582;Coleoptera;Trixagus obtusus;Trixagus obtusus;1;Trixagus obtusus;1;  
 KM442608;Coleoptera;Anthaxia fulgurans;Anthaxia fulgurans;1;Anthaxia fulgurans;1;  
 KM442611;Coleoptera;Uloma rufa;Uloma rufa;1;Uloma rufa;1;  
 KM442629;Coleoptera;Aulonothroscus brevicollis;Aulonothroscus brevicollis;1;Aulonothroscus brevicollis;1;  
 KM442640;Coleoptera;Bitoma crenata;Bitoma crenata;1;Bitoma crenata;1;  
 KM442674;Coleoptera;Xylostiba bosnica;Xylostiba bosnica;NA;Xylostiba bosnica;1;  
 KM442677;Coleoptera;Epuraea unicolor;Epuraea unicolor;1;Epuraea unicolor;0.999999999999972;  
 KM442680;Coleoptera;Euplectus infirmus;Euplectus infirmus;1;Euplectus infirmus;1;  
 KM442694;Coleoptera;Exocentrus adspersus;NA;NA;Exocentrus adspersus;1;  
 KM442703;Coleoptera;Cis glabratus;Cis glabratus;1;Cis glabratus;1;  
 KM442748;Coleoptera;Leptoplectus spinolae;Leptoplectus spinolae;1;Leptoplectus spinolae;1;  
 KM442774;Coleoptera;Ptiliolum caledonicum;Ptiliolum caledonicum;1;Ptiliolum caledonicum;1;  
 KM442801;Coleoptera;Xylotrechus antilope;Xylotrechus antilope;1;Xylotrechus antilope;1;  
 KM442875;Coleoptera;Hesperus rufipennis;Hesperus rufipennis;1;Hesperus rufipennis;1;  
 KM442881;Coleoptera;Aulonothroscus brevicollis;Aulonothroscus brevicollis;1;Aulonothroscus brevicollis;1;  
 KM442885;Coleoptera;Vincenzellus ruficollis;NA;NA;Vincenzellus ruficollis;1;  
 KM442890;Coleoptera;Trixagus carinifrons;Trixagus carinifrons;1;Trixagus carinifrons;1;  
 KM442917;Coleoptera;Tillus elongatus;NA;NA;Tillus elongatus;1;  
 KM442948;Coleoptera;Euplectus infirmus;Euplectus infirmus;1;Euplectus infirmus;1;  
 KM442950;Coleoptera;Hypnogyra angularis;Hypnogyra glabra;1;Hypnogyra glabra;1;  
 KM442977;Coleoptera;Denticollis linearis;Denticollis linearis;1;Denticollis linearis;1;  
 KM442983;Coleoptera;Homalota plana;Homalota plana;1;Homalota plana;1;  
 KM443017;Coleoptera;Homalota plana;NA;NA;Homalota plana;1;  
 KM443020;Coleoptera;Leptusa fumida;Leptusa fumida;1;Leptusa fumida;1;  
 KM443070;Coleoptera;Euplectus nanus;NA;0.319;NA;0.999999999999995;  
 KM443078;Coleoptera;Euplectus karstenii;Euplectus karstenii;1;Euplectus karstenii;1;  
 KM443088;Coleoptera;Anisotoma humeralis;Anisotoma humeralis;1;Anisotoma humeralis;0.999999999980901;  
 KM443097;Coleoptera;Dendrophilus pygmaeus;Dendrophilus pygmaeus;1;Dendrophilus pygmaeus;1;  
 KM443099;Coleoptera;Anisotoma glabra;Anisotoma glabra;1;Anisotoma glabra;1;  
 KM443148;Coleoptera;Euplectus piceus;Euplectus piceus;1;Euplectus piceus;1;  
 KM443202;Coleoptera;Atrecus affinis;NA;NA;Atrecus affinis;1;  
 KM443212;Coleoptera;Placusa tachyporoides;Placusa tachyporoides;1;Placusa tachyporoides;0.999999999019337;  
 KM443237;Coleoptera;Uloma culinaris;Uloma culinaris;1;Uloma culinaris;1;  
 KM443251;Coleoptera;Trixagus obtusus;Trixagus obtusus;1;Trixagus obtusus;1;  
 KM443269;Coleoptera;Dendrophilus punctatus;NA;1;Dendrophilus punctatus;1;  
 KM443278;Coleoptera;Plectophloeus fischeri;Plectophloeus fischeri;1;Plectophloeus fischeri;1;  
 KM443302;Coleoptera;Trypodendron domesticum;Trypodendron domesticum;1;Trypodendron domesticum;1;  
 KM443322;Coleoptera;Homalota plana;Homalota plana;NA;Homalota plana;1;  
 KM443334;Coleoptera;Euplectus karstenii;Euplectus karstenii;1;Euplectus karstenii;1;  
 KM443336;Coleoptera;Leptura aurulenta;Leptura aurulenta;1;Leptura aurulenta;1;  
 KM443385;Coleoptera;Attalus analis;Attalus analis;1;Attalus analis;1;  
 KM443392;Coleoptera;Anthaxia istriana;Anthaxia istriana;1;Anthaxia istriana;1;  
 KM443412;Coleoptera;Triplax rufipes;Triplax rufipes;1;Triplax rufipes;1;  
 KM443425;Coleoptera;Placusa tachyporoides;Placusa tachyporoides;1;Placusa tachyporoides;0.999999995754933;  
 KM443426;Coleoptera;Grammoptera ruficornis;Grammoptera ruficornis;1;Grammoptera ruficornis;1;  
 KM443430;Coleoptera;Plectophloeus nitidus;Plectophloeus nitidus;1;Plectophloeus nitidus;1;  
 KM443481;Coleoptera;Euplectus nanus;NA;0.135;NA;0.999999999999996;  
 KM443489;Coleoptera;Plagionotus arcuatus;Plagionotus arcuatus;1;Plagionotus arcuatus;0.999999997790724;  
 KM443511;Coleoptera;Hypnogyra angularis;Hypnogyra glabra;1;Hypnogyra glabra;1;  
 KM443540;Coleoptera;Anisotoma orbicularis;Anisotoma orbicularis;1;Anisotoma orbicularis;1;  
 KM443570;Coleoptera;Euplectus punctatus;Euplectus punctatus;1;Euplectus punctatus;1;  
 KM443591;Coleoptera;Anisotoma humeralis;Anisotoma humeralis;1;Anisotoma humeralis;0.99999999979735;  
 KM443603;Coleoptera;Tillus elongatus;NA;NA;Tillus elongatus;1;  
 KM443617;Coleoptera;Ptiliolum caledonicum;Ptiliolum caledonicum;1;Ptiliolum caledonicum;1;  
 KM443679;Coleoptera;Gnorimus variabilis;Gnorimus variabilis;1;Gnorimus variabilis;1;  
 KM443692;Coleoptera;Anthaxia fulgurans;NA;NA;Anthaxia fulgurans;1;  
 KM443721;Coleoptera;Anthaxia podolica;Anthaxia podolica;1;Anthaxia podolica;1;  
 KM443734;Coleoptera;Potamophilus acuminatus;Potamophilus acuminatus;NA;Potamophilus acuminatus;1;  
 KM443736;Coleoptera;Glischrochilus hortensis;Glischrochilus hortensis;1;Glischrochilus hortensis;1;  
 KM443754;Coleoptera;Atrecus longiceps;NA;NA;Atrecus longiceps;1;  
 KM443767;Coleoptera;Grammoptera ruficornis;Grammoptera ruficornis;1;Grammoptera ruficornis;1;

KM443781;Coleoptera;Grammoptera ustulata;Grammoptera ustulata;1;Grammoptera ustulata;1;  
KM443803;Coleoptera;Cis comptus;Cis comptus;1;Cis comptus;1;  
KM443806;Coleoptera;Ptiliolium caledonicum;Ptiliolium caledonicum;1;Ptiliolium caledonicum;1;  
KM443818;Coleoptera;Placusa atrata;Placusa atrata;1;Placusa atrata;1;  
KM443842;Coleoptera;Atrecus affinis;NA;NA;Atrecus affinis;1;  
KM443849;Coleoptera;Plectophloeus nubigena;Plectophloeus nubigena;1;Plectophloeus nubigena;1;  
KM443857;Coleoptera;Pteryngium crenatum;Pteryngium crenatum;1;Pteryngium crenatum;1;  
KM443884;Coleoptera;Hypulus quercinus;Hypulus quercinus;1;Hypulus quercinus;1;  
KM443941;Coleoptera;Leptusa pulchella;Leptusa pulchella;1;Leptusa pulchella;1;  
KM443957;Coleoptera;Anisandrus dispar;Anisandrus dispar;1;Anisandrus dispar;1;  
KM444004;Coleoptera;Ptenidium pusillum;NA;NA;Ptenidium pusillum;0.998336450701437;  
KM444016;Coleoptera;Potamophilus acuminatus;Potamophilus acuminatus;NA;Potamophilus  
acuminatus;1;  
KM444017;Coleoptera;Exocentrus lusitanus;Exocentrus lusitanus;1;Exocentrus lusitanus;1;  
KM444055;Coleoptera;Plagionotus arcuatus;Plagionotus arcuatus;1;Plagionotus  
arcuatus;0.99999999213742;  
KM444087;Coleoptera;Denticollis linearis;Denticollis linearis;1;Denticollis linearis;1;  
KM444090;Coleoptera;Phloeonomus punctipennis;Phloeonomus punctipennis;1;Phloeonomus  
punctipennis;1;  
KM444132;Coleoptera;Anisotoma castanea;Anisotoma castanea;1;Anisotoma  
castanea;0.9999999999574;  
KM444141;Coleoptera;Plectophloeus nitidus;Plectophloeus nitidus;1;Plectophloeus nitidus;1;  
KM444149;Coleoptera;Cis comptus;Cis comptus;1;Cis comptus;1;  
KM444168;Coleoptera;Hesperus rufipennis;Hesperus rufipennis;1;Hesperus rufipennis;1;  
KM444186;Coleoptera;Lepturobosca virens;Lepturobosca virens;NA;Lepturobosca virens;1;  
KM444195;Coleoptera;Cis dentatus;Cis dentatus;1;Cis dentatus;1;  
KM444202;Coleoptera;Anisandrus dispar;Anisandrus dispar;1;Anisandrus dispar;1;  
KM444221;Coleoptera;Vincenzellus ruficollis;NA;NA;Vincenzellus ruficollis;1;  
KM444228;Coleoptera;Anthaxia quadripunctata;Anthaxia quadripunctata;1;Anthaxia quadripunctata;1;  
KM444245;Coleoptera;Anthaxia podolica;Anthaxia podolica;1;Anthaxia podolica;1;  
KM444268;Coleoptera;Atrecus pilicornis;Atrecus pilicornis;1;Atrecus pilicornis;1;  
KM444332;Coleoptera;Pteryx suturalis;Pteryx suturalis;1;Pteryx suturalis;1;  
KM444338;Coleoptera;Euplectus kirbii;NA;0.319;NA;0.9999999999995;  
KM444347;Coleoptera;Atrecus longiceps;NA;NA;Atrecus longiceps;1;  
KM444371;Coleoptera;Phloeonomus minimus;Phloeonomus minimus;NA;Phloeonomus minimus;1;  
KM444379;Coleoptera;Xylostiba bosnica;Xylostiba bosnica;NA;Xylostiba bosnica;1;  
KM444389;Coleoptera;Atrecus affinis;NA;NA;Atrecus affinis;1;  
KM444410;Coleoptera;Hesperus rufipennis;Hesperus rufipennis;1;Hesperus rufipennis;1;  
KM444413;Coleoptera;Lepturobosca virens;Lepturobosca virens;1;Lepturobosca virens;1;  
KM444440;Coleoptera;Euryusa castanoptera;Euryusa castanoptera;1;Euryusa castanoptera;1;  
KM444463;Coleoptera;Euplectus piceus;Euplectus piceus;1;Euplectus piceus;1;  
KM444529;Coleoptera;Anthaxia nitidula;Anthaxia nitidula;1;Anthaxia nitidula;1;  
KM444534;Coleoptera;Vincenzellus ruficollis;NA;NA;Vincenzellus ruficollis;1;  
KM444549;Coleoptera;Phloeonomus punctipennis;Phloeonomus punctipennis;1;Phloeonomus  
punctipennis;1;  
KM444575;Coleoptera;Euplectus karstenii;Euplectus karstenii;1;Euplectus karstenii;1;  
KM444581;Coleoptera;Euryusa optabilis;Euryusa optabilis;1;Euryusa optabilis;0.9999999997533;  
KM444599;Coleoptera;Vincenzellus ruficollis;NA;NA;Vincenzellus ruficollis;1;  
KM444629;Coleoptera;Philothermus evanescens;Philothermus evanescens;1;Philothermus evanescens;1;  
KM444647;Coleoptera;Uloma rufa;Uloma rufa;1;Uloma rufa;1;  
KM444673;Coleoptera;Globicornis nigripes;Globicornis nigripes;1;Globicornis nigripes;1;  
KM444674;Coleoptera;Leptusa fumida;Leptusa fumida;1;Leptusa fumida;0.9999999999972;  
KM444708;Coleoptera;Cis dentatus;Cis dentatus;1;Cis dentatus;1;  
KM444713;Coleoptera;Epuraea unicolor;Epuraea unicolor;1;Epuraea unicolor;0.9999999999972;  
KM444716;Coleoptera;Denticollis linearis;Denticollis linearis;1;Denticollis linearis;1;  
KM444748;Coleoptera;Aulonium trisulcum;Aulonium trisulcum;1;Aulonium trisulcum;1;  
KM444773;Coleoptera;Plectophloeus nubigena;Plectophloeus nubigena;1;Plectophloeus  
nubigena;0.9999999999972;  
KM444789;Coleoptera;Valgus hemipterus;Valgus hemipterus;1;Valgus hemipterus;1;  
KM444799;Coleoptera;Euplectus nanus;NA;0.319;NA;0.9999999999995;  
KM444812;Coleoptera;Hypulus quercinus;Hypulus quercinus;1;Hypulus quercinus;1;  
KM444817;Coleoptera;Anthaxia quadripunctata;Anthaxia quadripunctata;1;Anthaxia quadripunctata;1;  
KM444833;Coleoptera;Glischrochilus quadriguttatus;Glischrochilus quadriguttatus;1;Glischrochilus  
quadriguttatus;1;  
KM444908;Coleoptera;Evodinus clathratus;Evodinus clathratus;1;Evodinus clathratus;1;  
KM444915;Coleoptera;Epuraea unicolor;Epuraea unicolor;1;Epuraea unicolor;1;  
KM444972;Coleoptera;Ernobius abietinus;Ernobius abietinus;1;Ernobius abietinus;1;  
KM444976;Coleoptera;Plectophloeus fischeri;Plectophloeus fischeri;1;Plectophloeus fischeri;1;  
KM444978;Coleoptera;Grammoptera ruficornis;NA;NA;Grammoptera ruficornis;1;  
KM445036;Coleoptera;Epuraea variegata;Epuraea variegata;1;Epuraea variegata;0.9999999912265;  
KM445045;Coleoptera;Trixagus obtusus;Trixagus obtusus;1;Trixagus obtusus;1;  
KM445081;Coleoptera;Ptiliolium caledonicum;Ptiliolium caledonicum;1;Ptiliolium caledonicum;1;  
KM445088;Coleoptera;Phloeonomus punctipennis;Phloeonomus punctipennis;1;Phloeonomus  
punctipennis;1;  
KM445120;Coleoptera;Philothermus evanescens;Philothermus evanescens;1;Philothermus evanescens;1;  
KM445160;Coleoptera;Leiopus nebulosus;NA;0.12;Leiopus linnei;0.911840242395976;  
KM445188;Coleoptera;Tropideres albirostris;Tropideres albirostris;1;Tropideres albirostris;1;  
KM445218;Coleoptera;Xylostiba bosnica;Xylostiba bosnica;NA;Xylostiba bosnica;1;

KM445276;Coleoptera;Leptusa fumida;Leptusa fumida;1;Leptusa fumida;0.999999999999972;  
KM445297;Coleoptera;Euplectus piceus;Euplectus piceus;1;Euplectus piceus;1;  
KM445303;Coleoptera;Uloa culinaris;Uloa culinaris;1;Uloa culinaris;1;  
KM445313;Coleoptera;Bibloporus bicolor;Bibloporus bicolor;1;Bibloporus  
bicolor;0.999999999999943;  
KM445316;Coleoptera;Euryusa pipitzi;Euryusa pipitzi;1;Euryusa pipitzi;1;  
KM445321;Coleoptera;Cis festivus;Orthocis festivus;1;Orthocis festivus;1;  
KM445330;Coleoptera;Aulonothroscus brevicollis;Aulonothroscus brevicollis;1;Aulonothroscus  
brevicollis;1;  
KM445339;Coleoptera;Euryusa castanoptera;Euryusa castanoptera;NA;Euryusa castanoptera;1;  
KM445354;Coleoptera;Anisotoma castanea;Anisotoma castanea;1;Anisotoma  
castanea;0.999999999999375;  
KM445364;Coleoptera;Cis dentatus;Cis dentatus;1;Cis dentatus;1;  
KM445414;Coleoptera;Batrisus formicarius;Batrisus formicarius;1;Batrisus formicarius;1;  
KM445429;Coleoptera;Phloeonomus minimus;Phloeonomus minimus;1;Phloeonomus minimus;1;  
KM445481;Coleoptera;Philothermus evanescens;Philothermus evanescens;1;Philothermus evanescens;1;  
KM445489;Coleoptera;Berginus tamarisci;NA;1;Berginus tamarisci;1;  
KM445527;Coleoptera;Gaurotus virginea;Gaurotus virginea;1;Gaurotus virginea;1;  
KM445582;Coleoptera;Gaurotus virginea;Gaurotus virginea;1;Gaurotus virginea;1;  
KM445623;Coleoptera;Attalus analis;Attalus analis;1;Attalus analis;1;  
KM445640;Coleoptera;Anthaxia candens;Anthaxia candens;1;Anthaxia candens;1;  
KM445667;Coleoptera;Euryusa castanoptera;Euryusa castanoptera;NA;Euryusa castanoptera;1;  
KM445698;Coleoptera;Potamophilus acuminatus;Potamophilus acuminatus;NA;Potamophilus  
acuminatus;1;  
KM445716;Coleoptera;Tillus elongatus;NA;NA;Tillus elongatus;1;  
KM445728;Coleoptera;Anthaxia helvetica;Anthaxia helvetica;1;Anthaxia helvetica;1;  
KM445734;Coleoptera;Grammoptera ruficornis;Grammoptera ruficornis;1;Grammoptera ruficornis;1;  
KM445745;Coleoptera;Anoplodera sexguttata;Anoplodera sexguttata;1;Anoplodera sexguttata;1;  
KM445749;Coleoptera;Cis festivus;Orthocis festivus;1;Orthocis festivus;1;  
KM445770;Coleoptera;Cis dentatus;Cis dentatus;1;Cis dentatus;1;  
KM445812;Coleoptera;Cis boleti;Cis boleti;1;Cis boleti;1;  
KM445822;Coleoptera;Xyleborinus saxesenii;Xyleborinus saxesenii;1;Xyleborinus saxesenii;1;  
KM445829;Coleoptera;Gnorimus variabilis;Gnorimus variabilis;1;Gnorimus variabilis;1;  
KM445866;Coleoptera;Vincenzellus ruficollis;NA;NA;Vincenzellus ruficollis;1;  
KM445945;Coleoptera;Euryusa optabilis;Euryusa optabilis;1;Euryusa optabilis;0.999999999966349;  
KM445963;Coleoptera;Valgus hemipterus;Valgus hemipterus;1;Valgus hemipterus;1;  
KM446009;Coleoptera;Xylostiba bosnica;Xylostiba bosnica;1;Xylostiba bosnica;1;  
KM446030;Coleoptera;Euplectus infirmus;Euplectus infirmus;1;Euplectus infirmus;1;  
KM446060;Coleoptera;Leiopus nebulosus;NA;0.12;Leiopus linnei;0.911840242395976;  
KM446063;Coleoptera;Xylostiba bosnica;Xylostiba bosnica;NA;Xylostiba bosnica;1;  
KM446102;Coleoptera;Leptusa pulchella;Leptusa pulchella;1;Leptusa pulchella;1;  
KM446120;Coleoptera;Hemicoelus costatus;Anobium fulvicorne;1;Anobium fulvicorne;1;  
KM446121;Coleoptera;Uloa rufa;Uloa rufa;1;Uloa rufa;1;  
KM446141;Coleoptera;Anthaxia helvetica;Anthaxia helvetica;1;Anthaxia helvetica;1;  
KM446163;Coleoptera;Anthaxia morio;Anthaxia morio;1;Anthaxia morio;1;  
KM446217;Coleoptera;Tillus elongatus;NA;NA;Tillus elongatus;1;  
KM446226;Coleoptera;Plectophloeus nubigena;Plectophloeus nubigena;1;Plectophloeus nubigena;1;  
KM446253;Coleoptera;Dendrophilus pygmaeus;Dendrophilus pygmaeus;1;Dendrophilus pygmaeus;1;  
KM446256;Coleoptera;Leptusa pulchella;Leptusa pulchella;1;Leptusa pulchella;1;  
KM446257;Coleoptera;Euplectus piceus;Euplectus piceus;1;Euplectus piceus;1;  
KM446328;Coleoptera;Euplectus karstenii;Euplectus karstenii;1;Euplectus karstenii;1;  
KM446332;Coleoptera;Uloa rufa;Uloa rufa;1;Uloa rufa;1;  
KM446368;Coleoptera;Xylotrechus antilope;Xylotrechus antilope;1;Xylotrechus antilope;1;  
KM446372;Coleoptera;Aulonium trisulcum;Aulonium trisulcum;1;Aulonium trisulcum;1;  
KM446388;Coleoptera;Elateroides dermestoides;Elateroides dermestoides;1;Elateroides  
dermestoides;1;  
KM446389;Coleoptera;Epuraea thoracica;Epuraea thoracica;0.001;Epuraea  
thoracica;0.999951020796953;  
KM446397;Coleoptera;Placusa depressa;Placusa depressa;1;Placusa depressa;0.999999760662121;  
KM446403;Coleoptera;Valgus hemipterus;Valgus hemipterus;1;Valgus hemipterus;1;  
KM446462;Coleoptera;Trypodendron domesticum;Trypodendron domesticum;1;Trypodendron domesticum;1;  
KM446499;Coleoptera;Xestobium rufovillosum;NA;1;Xestobium rufovillosum;1;  
KM446516;Coleoptera;Cis comptus;Cis comptus;1;Cis comptus;1;  
KM446521;Coleoptera;Trypodendron domesticum;Trypodendron domesticum;1;Trypodendron domesticum;1;  
KM446528;Coleoptera;Exocentrus adspersus;Exocentrus adspersus;1;Exocentrus adspersus;1;  
KM446533;Coleoptera;Atrecus pilicornis;Atrecus pilicornis;1;Atrecus pilicornis;1;  
KM446627;Coleoptera;Cis festivus;Orthocis festivus;1;Orthocis festivus;1;  
KM446632;Coleoptera;Xylostiba bosnica;Xylostiba bosnica;NA;Xylostiba bosnica;1;  
KM446666;Coleoptera;Anisotoma orbicularis;Anisotoma orbicularis;1;Anisotoma orbicularis;1;  
KM446672;Coleoptera;Plectophloeus nitidus;Plectophloeus nitidus;1;Plectophloeus nitidus;1;  
KM446680;Coleoptera;Trypodendron domesticum;Trypodendron domesticum;1;Trypodendron domesticum;1;  
KM446683;Coleoptera;Vincenzellus ruficollis;NA;NA;Vincenzellus ruficollis;1;  
KM446725;Coleoptera;Ptilinus fuscus;Ptilinus fuscus;1;Ptilinus fuscus;1;  
KM446748;Coleoptera;Phloeonomus punctipennis;Phloeonomus punctipennis;1;Phloeonomus  
punctipennis;1;  
KM446777;Coleoptera;Leptusa fumida;Leptusa fumida;1;Leptusa fumida;1;  
KM446779;Coleoptera;Bitoma crenata;Bitoma crenata;1;Bitoma crenata;1;  
KM446796;Coleoptera;Latridius minutus;Latridius minutus;1;Latridius minutus;0.99999997678566;

KM446803;Coleoptera;Placusa pumilio;Placusa pumilio;1;Placusa pumilio;1;  
 KM446847;Coleoptera;Hemicoelus costatus;NA;NA;Anobium fulvicorne;1;  
 KM446864;Coleoptera;Homophthalmus rugicollis;NA;1;Dryophilus rugicollis;1;  
 KM446907;Coleoptera;Platystomos albinus;NA;NA;Platystomos albinus;1;  
 KM446920;Coleoptera;Anoploclera sexguttata;Anoploclera sexguttata;1;Anoploclera sexguttata;1;  
 KM446926;Coleoptera;Pteryngium crenatum;Pteryngium crenatum;1;Pteryngium crenatum;1;  
 KM446953;Coleoptera;Uloa culinaris;Uloa culinaris;1;Uloa culinaris;1;  
 KM446967;Coleoptera;Xylotrechus antilope;Xylotrechus antilope;1;Xylotrechus antilope;1;  
 KM447033;Coleoptera;Cis castaneus;Cis castaneus;NA;Cis castaneus;1;  
 KM447034;Coleoptera;Xestobium rufovillosum;NA;1;Xestobium rufovillosum;1;  
 KM447055;Coleoptera;Pteryx suturalis;Pteryx suturalis;NA;Pteryx suturalis;1;  
 KM447099;Coleoptera;Phloeonomus punctipennis;Phloeonomus punctipennis;1;Phloeonomus punctipennis;1;  
 KM447108;Coleoptera;Anthaxia quadripunctata;Anthaxia quadripunctata;1;Anthaxia quadripunctata;1;  
 KM447112;Coleoptera;Eucnemis capucina;Eucnemis capucina;1;Eucnemis capucina;1;  
 KM447126;Coleoptera;Anthaxia istriana;Anthaxia istriana;1;Anthaxia istriana;1;  
 KM447127;Coleoptera;Pteryngium crenatum;Pteryngium crenatum;1;Pteryngium crenatum;1;  
 KM447171;Coleoptera;Plectophloeus fischeri;Plectophloeus fischeri;1;Plectophloeus fischeri;1;  
 KM447215;Coleoptera;Anthaxia godeti;Anthaxia godeti;1;Anthaxia godeti;1;  
 KM447221;Coleoptera;Gnathotrichus materiarius;Gnathotrichus materiarius;1;Gnathotrichus materiarius;1;  
 KM447260;Coleoptera;Plectophloeus nitidus;Plectophloeus nitidus;1;Plectophloeus nitidus;1;  
 KM447285;Coleoptera;Anthaxia helvetica;Anthaxia helvetica;1;Anthaxia helvetica;1;  
 KM447320;Coleoptera;Grammoptera ruficornis;Grammoptera ruficornis;1;Grammoptera ruficornis;1;  
 KM447330;Coleoptera;Aulonium trisulcum;Aulonium trisulcum;1;Aulonium trisulcum;1;  
 KM447342;Coleoptera;Euplectus karstenii;Euplectus karstenii;1;Euplectus karstenii;1;  
 KM447397;Coleoptera;Gnathotrichus materiarius;Gnathotrichus materiarius;1;Gnathotrichus materiarius;1;  
 KM447404;Coleoptera;Aulonothroscus brevicollis;Aulonothroscus brevicollis;1;Aulonothroscus brevicollis;1;  
 KM447419;Coleoptera;Hypnogyra angularis;Hypnogyra glabra;1;Hypnogyra glabra;1;  
 KM447447;Coleoptera;Aulonothroscus brevicollis;Aulonothroscus brevicollis;1;Aulonothroscus brevicollis;1;  
 KM447482;Coleoptera;Polygraphus poligraphus;Polygraphus poligraphus;1;Polygraphus poligraphus;0.999999999993719;  
 KM447495;Coleoptera;Denticollis linearis;Denticollis linearis;1;Denticollis linearis;1;  
 KM447510;Coleoptera;Ptiliolum caledonicum;Ptiliolum caledonicum;1;Ptiliolum caledonicum;1;  
 KM447526;Coleoptera;Potamophilus acuminatus;Potamophilus acuminatus;NA;Potamophilus acuminatus;1;  
 KM447529;Coleoptera;Anthaxia helvetica;Anthaxia helvetica;1;Anthaxia helvetica;1;  
 KM447567;Coleoptera;Placusa pumilio;Placusa pumilio;1;Placusa pumilio;1;  
 KM447574;Coleoptera;Anthaxia helvetica;Anthaxia helvetica;1;Anthaxia helvetica;1;  
 KM447576;Coleoptera;Hypoganus inunctus;Hypoganus inunctus;1;Hypoganus inunctus;1;  
 KM447629;Coleoptera;Phloeocharis subtilissima;Phloeocharis subtilissima;1;Phloeocharis subtilissima;1;  
 KM447646;Coleoptera;Exocentrus adspersus;Exocentrus adspersus;1;Exocentrus adspersus;1;  
 KM447649;Coleoptera;Anthaxia morio;Anthaxia morio;1;Anthaxia morio;1;  
 KM447669;Coleoptera;Xyleborus monographus;Xyleborus monographus;1;Xyleborus monographus;0.99999999999915;  
 KM447711;Coleoptera;Atrecus affinis;Atrecus affinis;1;Atrecus affinis;1;  
 KM447719;Coleoptera;Euryusa castanoptera;Euryusa castanoptera;1;Euryusa castanoptera;1;  
 KM447764;Coleoptera;Plectophloeus fischeri;Plectophloeus fischeri;1;Plectophloeus fischeri;1;  
 KM447834;Coleoptera;Bitoma crenata;Bitoma crenata;1;Bitoma crenata;1;  
 KM447903;Coleoptera;Vincenzellus ruficollis;Vincenzellus ruficollis;1;Vincenzellus ruficollis;1;  
 KM447905;Coleoptera;Anthaxia podolica;Anthaxia podolica;1;Anthaxia podolica;1;  
 KM447956;Coleoptera;Plectophloeus nitidus;Plectophloeus nitidus;1;Plectophloeus nitidus;1;  
 KM448007;Coleoptera;Anisotoma orbicularis;Anisotoma orbicularis;1;Anisotoma orbicularis;1;  
 KM448025;Coleoptera;Pteryngium crenatum;Pteryngium crenatum;1;Pteryngium crenatum;1;  
 KM448039;Coleoptera;Cis castaneus;Cis castaneus;1;Cis castaneus;1;  
 KM448088;Coleoptera;Denticollis linearis;Denticollis linearis;1;Denticollis linearis;1;  
 KM448104;Coleoptera;Hesperus rufipennis;Hesperus rufipennis;1;Hesperus rufipennis;1;  
 KM448112;Coleoptera;Plectophloeus nubigena;Plectophloeus nubigena;1;Plectophloeus nubigena;1;  
 KM448137;Coleoptera;Euplectus brunneus;Euplectus brunneus;1;Euplectus brunneus;1;  
 KM448149;Coleoptera;Polygraphus grandiclava;Polygraphus grandiclava;1;Polygraphus grandiclava;0.9999999972001;  
 KM448160;Coleoptera;Anthaxia helvetica;Anthaxia helvetica;1;Anthaxia helvetica;1;  
 KM448165;Coleoptera;Anthaxia godeti;Anthaxia godeti;1;Anthaxia godeti;1;  
 KM448177;Coleoptera;Euplectus nanus;NA;0.135;NA;0.99999999999996;  
 KM448250;Coleoptera;Potamophilus acuminatus;Potamophilus acuminatus;NA;Potamophilus acuminatus;1;  
 KM448257;Coleoptera;Vincenzellus ruficollis;NA;NA;Vincenzellus ruficollis;1;  
 KM448302;Coleoptera;Vincenzellus ruficollis;NA;NA;Vincenzellus ruficollis;1;  
 KM448338;Coleoptera;Cis dentatus;Cis dentatus;1;Cis dentatus;1;  
 KM448345;Coleoptera;Valgus hemipterus;Valgus hemipterus;1;Valgus hemipterus;1;  
 KM448353;Coleoptera;Euplectus piceus;Euplectus piceus;1;Euplectus piceus;1;  
 KM448418;Coleoptera;Exocentrus lusitanus;Exocentrus lusitanus;1;Exocentrus lusitanus;1;  
 KM448444;Coleoptera;Evodinus clathratus;Evodinus clathratus;1;Evodinus clathratus;1;  
 KM448450;Coleoptera;Ptiliolum marginatum;NA;NA;Ptiliolum marginatum;1;

KM448451;Coleoptera;Epuraea unicolor;Epuraea unicolor;1;Epuraea unicolor;0.999999999999972;  
KM448462;Coleoptera;Xylostiba bosnica;Xylostiba bosnica;NA;Xylostiba bosnica;1;  
KM448495;Coleoptera;Euplectus nanus;NA;0.132;Euplectus nanus;0.817875111887982;  
KM448515;Coleoptera;Berginus tamarisci;NA;1;Berginus tamarisci;1;  
KM448546;Coleoptera;Plagionotus arcuatus;Plagionotus arcuatus;1;Plagionotus  
arcuatus;0.999999999705665;  
KM448568;Coleoptera;Euryusa optabilis;Euryusa optabilis;1;Euryusa optabilis;0.999999999908795;  
KM448581;Coleoptera;Denticollis linearis;Denticollis linearis;1;Denticollis linearis;1;  
KM448599;Coleoptera;Exocentrus adpersus;Exocentrus adpersus;1;Exocentrus adpersus;1;  
KM448603;Coleoptera;Epuraea variegata;Epuraea variegata;1;Epuraea variegata;0.999999999704329;  
KM448629;Coleoptera;Hypebaeus flavipes;Hypebaeus flavipes;1;Hypebaeus flavipes;1;  
KM448634;Coleoptera;Anthaxia millefolii;Anthaxia millefolii;1;Anthaxia millefolii;1;  
KM448655;Coleoptera;Hemicoelus costatus;Anobium fulvicorne;1;Anobium fulvicorne;1;  
KM448656;Coleoptera;Euplectus karstenii;Euplectus karstenii;1;Euplectus karstenii;1;  
KM448674;Coleoptera;Xyleborinus saxesenii;Xyleborinus saxesenii;1;Xyleborinus saxesenii;1;  
KM448699;Coleoptera;Anthaxia quadripunctata;Anthaxia quadripunctata;1;Anthaxia quadripunctata;1;  
KM448717;Coleoptera;Plectophloeus nubigena;Plectophloeus nubigena;1;Plectophloeus  
nubigena;0.999999999999972;  
KM448771;Coleoptera;Xyleborus monographus;Xyleborus monographus;1;Xyleborus  
monographus;0.999999999999631;  
KM448795;Coleoptera;Anthaxia istriana;Anthaxia istriana;1;Anthaxia istriana;1;  
KM448832;Coleoptera;Plectophloeus nitidus;Plectophloeus nitidus;1;Plectophloeus nitidus;1;  
KM448841;Coleoptera;Uloa culinaris;Uloa culinaris;1;Uloa culinaris;1;  
KM448847;Coleoptera;Anthaxia helvetica;Anthaxia helvetica;1;Anthaxia helvetica;1;  
KM448876;Coleoptera;Tritoma bipustulata;NA;1;Tritoma bipustulata;1;  
KM448883;Coleoptera;Triplax rufipes;Triplax rufipes;1;Triplax rufipes;1;  
KM448891;Coleoptera;Leptusa fumida;Leptusa fumida;1;Leptusa fumida;0.99999999999687;  
KM448906;Coleoptera;Hypoganus inunctus;Hypoganus inunctus;1;Hypoganus inunctus;1;  
KM448931;Coleoptera;Latridius anthracinus;Latridius anthracinus;1;Latridius anthracinus;1;  
KM448989;Coleoptera;Epuraea pygmaea;Epuraea pygmaea;1;Epuraea pygmaea;0.99999999999915;  
KM449006;Coleoptera;Atrecus longiceps;NA;NA;Atrecus longiceps;1;  
KM449059;Coleoptera;Polygraphus poligraphus;Polygraphus poligraphus;1;Polygraphus  
poligraphus;0.999999999893191;  
KM449070;Coleoptera;Troglops albicans;Troglops albicans;NA;Troglops albicans;1;  
KM449098;Coleoptera;Uloa rufa;Uloa rufa;1;Uloa rufa;1;  
KM449127;Coleoptera;Hesperus rufipennis;Hesperus rufipennis;1;Hesperus rufipennis;1;  
KM449132;Coleoptera;Euplectus karstenii;Euplectus karstenii;1;Euplectus  
karstenii;0.999999999999972;  
KM449160;Coleoptera;Anoplodera sexguttata;Anoplodera sexguttata;1;Anoplodera sexguttata;1;  
KM449249;Coleoptera;Epuraea variegata;Epuraea variegata;1;Epuraea variegata;0.999999999840242;  
KM449292;Coleoptera;Ernobius abietis;Ernobius abietis;1;Ernobius abietis;1;  
KM449293;Coleoptera;Atrecus longiceps;NA;NA;Atrecus longiceps;1;  
KM449325;Coleoptera;Polygraphus poligraphus;Polygraphus poligraphus;1;Polygraphus  
poligraphus;0.99999999999423;  
KM449362;Coleoptera;Xestobium rufovillosus;NA;1;Xestobium rufovillosus;1;  
KM449379;Coleoptera;Euplectus brunneus;Euplectus brunneus;1;Euplectus brunneus;1;  
KM449415;Coleoptera;Cis glabratus;Cis glabratus;1;Cis glabratus;1;  
KM449436;Coleoptera;Pteryngium crenatum;Pteryngium crenatum;1;Pteryngium crenatum;1;  
KM449481;Coleoptera;Elateroides dermestoides;Elateroides dermestoides;1;Elateroides  
dermestoides;1;  
KM449525;Coleoptera;Cis glabratus;Cis glabratus;1;Cis glabratus;1;  
KM449530;Coleoptera;Batrisus formicarius;Batrisus formicarius;1;Batrisus formicarius;1;  
KM449571;Coleoptera;Attalus analis;Attalus analis;1;Attalus analis;1;  
KM449618;Coleoptera;Anisotoma orbicularis;Anisotoma orbicularis;1;Anisotoma orbicularis;1;  
KM449621;Coleoptera;Hymenalia rufipes;Hymenalia rufipes;NA;Hymenalia rufipes;1;  
KM449660;Coleoptera;Bibloporus bicolor;Bibloporus bicolor;1;Bibloporus  
bicolor;0.99999999999886;  
KM449752;Coleoptera;Aulonothroscus brevicollis;Aulonothroscus brevicollis;1;Aulonothroscus  
brevicollis;1;  
KM449770;Coleoptera;Placusa depressa;Placusa depressa;1;Placusa depressa;0.999999956008339;  
KM449799;Coleoptera;Glischrochilus hortensis;Glischrochilus hortensis;1;Glischrochilus  
hortensis;1;  
KM449800;Coleoptera;Cis comptus;Cis comptus;1;Cis comptus;1;  
KM449822;Coleoptera;Tritoma bipustulata;NA;1;Tritoma bipustulata;1;  
KM449827;Coleoptera;Glischrochilus hortensis;Glischrochilus hortensis;NA;Glischrochilus  
hortensis;1;  
KM449844;Coleoptera;Ernobius abietis;NA;1;Ernobius abietis;1;  
KM449845;Coleoptera;Bitoma crenata;Bitoma crenata;1;Bitoma crenata;1;  
KM449883;Coleoptera;Hemicoelus nitidus;Anobium nitidum;1;Anobium nitidum;1;  
KM449885;Coleoptera;Xylostiba bosnica;Xylostiba bosnica;NA;Xylostiba bosnica;1;  
KM449896;Coleoptera;Hymenalia rufipes;Hymenalia rufipes;NA;Hymenalia rufipes;1;  
KM449949;Coleoptera;Bitoma crenata;Bitoma crenata;1;Bitoma crenata;1;  
KM449954;Coleoptera;Hypnogyra angularis;Hypnogyra glabra;1;Hypnogyra glabra;1;  
KM449998;Coleoptera;Dendrophilus punctatus;NA;1;Dendrophilus punctatus;1;  
KM449999;Coleoptera;Philothermus evanescens;Philothermus evanescens;1;Philothermus evanescens;1;  
KM450023;Coleoptera;Cis glabratus;Cis glabratus;1;Cis glabratus;1;  
KM450071;Coleoptera;Xylostiba bosnica;Xylostiba bosnica;NA;Xylostiba bosnica;1;  
KM450072;Coleoptera;Bitoma crenata;Bitoma crenata;1;Bitoma crenata;1;

KM450088;Coleoptera;Platystomos albinus;NA;NA;Platystomos albinus;1;  
 KM450106;Coleoptera;Plegaderus caesus;Plegaderus caesus;1;Plegaderus caesus;1;  
 KM450118;Coleoptera;Agrilus viridis;Agrilus viridis;1;Agrilus viridis;0.999999746205109;  
 KM450143;Coleoptera;Anthaxia helvetica;Anthaxia helvetica;1;Anthaxia helvetica;1;  
 KM450191;Coleoptera;Anthaxia quadripunctata;Anthaxia quadripunctata;1;Anthaxia quadripunctata;1;  
 KM450239;Coleoptera;Gnorimus variabilis;Gnorimus variabilis;1;Gnorimus variabilis;1;  
 KM450289;Coleoptera;Hypnogyra angularis;Hypnogyra glabra;1;Hypnogyra glabra;1;  
 KM450340;Coleoptera;Euplectus kirbii;NA;0.041;Euplectus kirbyi;0.939713583326614;  
 KM450355;Coleoptera;Epuraea variegata;Epuraea variegata;1;Epuraea variegata;0.99999999840242;  
 KM450380;Coleoptera;Euryusa optabilis;Euryusa optabilis;1;Euryusa optabilis;0.9999999997533;  
 KM450396;Coleoptera;Anthaxia istriana;Anthaxia istriana;1;Anthaxia istriana;1;  
 KM450403;Coleoptera;Anthaxia fulgurans;Anthaxia fulgurans;1;Anthaxia fulgurans;1;  
 KM450450;Coleoptera;Bitoma crenata;Bitoma crenata;1;Bitoma crenata;1;  
 KM450455;Coleoptera;Glischrochilus quadriguttatus;Glischrochilus quadriguttatus;1;Glischrochilus quadriguttatus;1;  
 KM450469;Coleoptera;Anoplodera sexguttata;Anoplodera sexguttata;1;Anoplodera sexguttata;1;  
 KM450511;Coleoptera;Leiopus nebulosus;NA;0.12;Leiopus linnei;0.911840242395976;  
 KM450512;Coleoptera;Plectophloeus nubigena;Plectophloeus nubigena;1;Plectophloeus nubigena;1;  
 KM450553;Coleoptera;Bibloporus bicolor;Bibloporus bicolor;1;Bibloporus bicolor;0.99999999999972;  
 KM450556;Coleoptera;Anthaxia fulgurans;NA;NA;Anthaxia fulgurans;1;  
 KM450575;Coleoptera;Trixagus carinifrons;Trixagus carinifrons;1;Trixagus carinifrons;1;  
 KM450584;Coleoptera;Anoplodera sexguttata;Anoplodera sexguttata;1;Anoplodera sexguttata;1;  
 KM450590;Coleoptera;Plegaderus caesus;Plegaderus caesus;1;Plegaderus caesus;1;  
 KM450621;Coleoptera;Tillus elongatus;NA;NA;Tillus elongatus;1;  
 KM450643;Coleoptera;Phloeonomus punctipennis;Phloeonomus punctipennis;1;Phloeonomus punctipennis;1;  
 KM450668;Coleoptera;Exocentrus adspersus;NA;NA;Exocentrus adspersus;1;  
 KM450683;Coleoptera;Ernobius abietis;Ernobius abietis;1;Ernobius abietis;1;  
 KM450689;Coleoptera;Cis festivus;Orthocis festivus;1;Orthocis festivus;1;  
 KM450744;Coleoptera;Hololepta plana;Hololepta plana;1;Hololepta plana;1;  
 KM450773;Coleoptera;Tillus elongatus;NA;NA;Tillus elongatus;1;  
 KM450803;Coleoptera;Cis hispidus;NA;NA;Cis hispidus;0.999999793431037;  
 KM450819;Coleoptera;Euplectus nanus;NA;0.105;NA;0.99999999999987;  
 KM450841;Coleoptera;Polygraphus poligraphus;Polygraphus poligraphus;1;Polygraphus poligraphus;0.999999999993719;  
 KM450871;Coleoptera;Bitoma crenata;Bitoma crenata;1;Bitoma crenata;1;  
 KM450882;Coleoptera;Bitoma crenata;Bitoma crenata;1;Bitoma crenata;1;  
 KM450996;Coleoptera;Anisotoma castanea;Anisotoma castanea;1;Anisotoma castanea;0.999999999995168;  
 KM451038;Coleoptera;Anoplodera sexguttata;Anoplodera sexguttata;1;Anoplodera sexguttata;1;  
 KM451070;Coleoptera;Euplectus karstenii;Euplectus karstenii;1;Euplectus karstenii;1;  
 KM451104;Coleoptera;Grammoptera ruficornis;Grammoptera ruficornis;1;Grammoptera ruficornis;1;  
 KM451107;Coleoptera;Exocentrus adspersus;Exocentrus adspersus;1;Exocentrus adspersus;1;  
 KM451176;Coleoptera;Anisotoma humeralis;Anisotoma humeralis;1;Anisotoma humeralis;0.99999999979991;  
 KM451263;Coleoptera;Bibloporus bicolor;Bibloporus bicolor;1;Bibloporus bicolor;0.99999999999943;  
 KM451284;Coleoptera;Euplectus piceus;Euplectus piceus;1;Euplectus piceus;1;  
 KM451290;Coleoptera;Leiopus femoratus;Leiopus femoratus;1;Leiopus femoratus;1;  
 KM451321;Coleoptera;Plectophloeus nitidus;Plectophloeus nitidus;1;Plectophloeus nitidus;1;  
 KM451354;Coleoptera;Pteryx suturalis;Pteryx suturalis;NA;Pteryx suturalis;1;  
 KM451386;Coleoptera;Leptoplectus spinolae;Leptoplectus spinolae;1;Leptoplectus spinolae;1;  
 KM451408;Coleoptera;Cis castaneus;Cis castaneus;1;Cis castaneus;1;  
 KM451425;Coleoptera;Anthaxia helvetica;Anthaxia helvetica;1;Anthaxia helvetica;1;  
 KM451431;Coleoptera;Cis glabratus;Cis glabratus;1;Cis glabratus;1;  
 KM451507;Coleoptera;Hypoganus inunctus;Hypoganus inunctus;1;Hypoganus inunctus;1;  
 KM451512;Coleoptera;Grammoptera ruficornis;Grammoptera ruficornis;1;Grammoptera ruficornis;1;  
 KM451533;Coleoptera;Euplectus nanus;NA;NA;NA;0.99999999999993;  
 KM451543;Coleoptera;Euryusa optabilis;Euryusa optabilis;1;Euryusa optabilis;0.9999999997533;  
 KM451567;Coleoptera;Tillus elongatus;Tillus elongatus;1;Tillus elongatus;1;  
 KM451588;Coleoptera;Grammoptera ruficornis;Grammoptera ruficornis;1;Grammoptera ruficornis;1;  
 KM451589;Coleoptera;Glischrochilus quadripunctatus;Glischrochilus quadripunctatus;0.002;Glischrochilus quadripunctatus;0.999999698889542;  
 KM451591;Coleoptera;Berginus tamarisci;NA;1;Berginus tamarisci;1;  
 KM451643;Coleoptera;Gnorimus nobilis;Gnorimus nobilis;1;Gnorimus nobilis;1;  
 KM451646;Coleoptera;Anthaxia istriana;Anthaxia istriana;1;Anthaxia istriana;1;  
 KM451655;Coleoptera;Placusa tachyporoides;Placusa tachyporoides;1;Placusa tachyporoides;0.99999999886654;  
 KM451658;Coleoptera;Trixagus obtusus;Trixagus obtusus;1;Trixagus obtusus;1;  
 KM451674;Coleoptera;Hymenalia rufipes;Hymenalia rufipes;NA;Hymenalia rufipes;1;  
 KM451676;Coleoptera;Anthaxia mendizabali;Anthaxia mendizabali;1;Anthaxia mendizabali;1;  
 KM451700;Coleoptera;Hesperus rufipennis;Hesperus rufipennis;1;Hesperus rufipennis;1;  
 KM451701;Coleoptera;Cis castaneus;Cis castaneus;1;Cis castaneus;1;  
 KM451710;Coleoptera;Philothermus evanescens;NA;1;Philothermus evanescens;1;  
 KM451744;Coleoptera;Evodinus clathratus;Evodinus clathratus;1;Evodinus clathratus;1;  
 KM451763;Coleoptera;Anthaxia godeti;Anthaxia godeti;1;Anthaxia godeti;1;  
 KM451805;Coleoptera;Anthaxia quadripunctata;Anthaxia quadripunctata;1;Anthaxia quadripunctata;1;



KM451813;Coleoptera;Elateroidea dermestoides;NA;1;Elateroidea dermestoides;1;  
 KM451840;Coleoptera;Placusa atrata;Placusa atrata;1;Placusa atrata;1;  
 KM451864;Coleoptera;Anisandrus dispar;Anisandrus dispar;1;Anisandrus dispar;1;  
 KM451953;Coleoptera;Leptura aethiops;Leptura aethiops;1;Leptura aethiops;1;  
 KM451961;Coleoptera;Plagionotus arcuatus;Plagionotus arcuatus;1;Plagionotus  
 arcuatus;0.999999999038835;  
 KM451983;Coleoptera;Anisotoma castanea;Anisotoma castanea;1;Anisotoma  
 castanea;0.99999999999289;  
 KM452012;Coleoptera;Glischrochilus quadriguttatus;Glischrochilus quadriguttatus;1;Glischrochilus  
 quadriguttatus;1;  
 KM452059;Coleoptera;Atrecus affinis;NA;NA;Atrecus affinis;1;  
 KM452083;Coleoptera;Anthaxia fulgurans;Anthaxia fulgurans;1;Anthaxia fulgurans;1;  
 KM452085;Coleoptera;Aulonothroscus brevicollis;Aulonothroscus brevicollis;1;Aulonothroscus  
 brevicollis;1;  
 KM452105;Coleoptera;Hololepta plana;Hololepta plana;1;Hololepta plana;1;  
 KM452183;Coleoptera;Lepturobosca virens;Lepturobosca virens;1;Lepturobosca virens;1;  
 KM452188;Coleoptera;Homalota plana;NA;NA;Homalota plana;1;  
 KM452233;Coleoptera;Ernobius abietinus;Ernobius abietinus;1;Ernobius abietinus;1;  
 KM452248;Coleoptera;Exocentrus lusitanus;Exocentrus lusitanus;1;Exocentrus lusitanus;1;  
 KM452262;Coleoptera;Anisotoma humeralis;Anisotoma humeralis;1;Anisotoma  
 humeralis;0.99999999912376;  
 KM452268;Coleoptera;Bitoma crenata;Bitoma crenata;1;Bitoma crenata;1;  
 KM452273;Coleoptera;Tillus elongatus;NA;NA;Tillus elongatus;1;  
 KM452282;Coleoptera;Cis dentatus;Cis dentatus;1;Cis dentatus;1;  
 KM452286;Coleoptera;Vincenzellus ruficollis;NA;NA;Vincenzellus ruficollis;1;  
 KM452292;Coleoptera;Cis hispidus;NA;0.107;Cis hispidus;0.999999939132836;  
 KM452358;Coleoptera;Elateroidea dermestoides;NA;1;Elateroidea dermestoides;1;  
 KM452376;Coleoptera;Placusa tachyporoides;Placusa tachyporoides;1;Placusa  
 tachyporoides;0.99999995754933;  
 KM452390;Coleoptera;Bitoma crenata;Bitoma crenata;1;Bitoma crenata;1;  
 KM452392;Coleoptera;Xyleborinus saxesenii;Xyleborinus saxesenii;1;Xyleborinus saxesenii;1;  
 KM452416;Coleoptera;Anthaxia candens;Anthaxia candens;1;Anthaxia candens;1;  
 KM452423;Coleoptera;Batrisus formicarius;Batrisus formicarius;1;Batrisus formicarius;1;  
 KM452502;Coleoptera;Uloma rufa;Uloma rufa;1;Uloma rufa;1;  
 KM452510;Coleoptera;Epuraea unicolor;Epuraea unicolor;1;Epuraea unicolor;0.999999999999943;  
 KM452520;Coleoptera;Hylastes attenuatus;Hylastes attenuatus;1;Hylastes attenuatus;1;  
 KM452555;Coleoptera;Euplectus infirmus;Euplectus infirmus;1;Euplectus infirmus;1;  
 KM452571;Coleoptera;Tropideres albirostris;Tropideres albirostris;1;Tropideres albirostris;1;  
 KM452588;Coleoptera;Atrecus affinis;Atrecus affinis;1;Atrecus affinis;1;  
 KM452592;Coleoptera;Hesperus rufipennis;Hesperus rufipennis;NA;Hesperus rufipennis;1;  
 KM452643;Coleoptera;Uloma rufa;Uloma rufa;1;Uloma rufa;1;  
 KM452649;Coleoptera;Pteryx suturalis;NA;NA;Pteryx suturalis;1;  
 KM452657;Coleoptera;Anthaxia quadripunctata;Anthaxia quadripunctata;1;Anthaxia quadripunctata;1;  
 KM452662;Coleoptera;Anthaxia morio;Anthaxia morio;1;Anthaxia morio;1;  
 KM452677;Coleoptera;Platystomos albinus;Platystomos albinus;1;Platystomos albinus;1;  
 KM452678;Coleoptera;Latridius minutus;Latridius minutus;1;Latridius minutus;0.999999999993065;  
 KM452694;Coleoptera;Xyleborinus saxesenii;Xyleborinus saxesenii;1;Xyleborinus saxesenii;1;  
 KU494206;Coleoptera;Priobium carpini;Priobium carpini;1;Priobium carpini;1;  
 KU494207;Coleoptera;Priobium carpini;Priobium carpini;1;Priobium carpini;1;  
 KU494208;Coleoptera;Priobium carpini;Priobium carpini;1;Priobium carpini;1;  
 KU494211;Coleoptera;Ptilinus pectinicornis;Ptilinus pectinicornis;1;Ptilinus  
 pectinicornis;0.999999999999972;  
 KU494212;Coleoptera;Ptilinus pectinicornis;Ptilinus pectinicornis;1;Ptilinus  
 pectinicornis;0.999999999999972;  
 KU494213;Coleoptera;Ptilinus pectinicornis;Ptilinus pectinicornis;1;Ptilinus  
 pectinicornis;0.999999999999972;  
 KU494214;Coleoptera;Ptilinus pectinicornis;Ptilinus pectinicornis;1;Ptilinus  
 pectinicornis;0.999999999999972;  
 KU494215;Coleoptera;Ptilinus pectinicornis;Ptilinus pectinicornis;1;Ptilinus  
 pectinicornis;0.999999999999972;  
 KU494216;Coleoptera;Ptilinus pectinicornis;Ptilinus pectinicornis;1;Ptilinus  
 pectinicornis;0.999999999999972;  
 KU906136;Coleoptera;Plagionotus arcuatus;Plagionotus arcuatus;1;Plagionotus  
 arcuatus;0.99999998658836;  
 KU906175;Coleoptera;Phloeocharis subtilissima;Phloeocharis subtilissima;NA;Phloeocharis  
 subtilissima;1;  
 KU906183;Coleoptera;Pteryx suturalis;Pteryx suturalis;1;Pteryx suturalis;1;  
 KU906211;Coleoptera;Plectophloeus fischeri;Plectophloeus fischeri;1;Plectophloeus fischeri;1;  
 KU906214;Coleoptera;Valgus hemipterus;Valgus hemipterus;1;Valgus hemipterus;1;  
 KU906227;Coleoptera;Evodinus clathratus;Evodinus clathratus;1;Evodinus clathratus;1;  
 KU906258;Coleoptera;Placusa pumilio;Placusa pumilio;1;Placusa pumilio;1;  
 KU906284;Coleoptera;Anthaxia morio;Anthaxia morio;1;Anthaxia morio;1;  
 KU906323;Coleoptera;Hypnogyra angularis;Hypnogyra glabra;1;Hypnogyra glabra;1;  
 KU906331;Coleoptera;Elateroidea dermestoides;Elateroidea dermestoides;1;Elateroidea  
 dermestoides;1;  
 KU906334;Coleoptera;Phloeonomus punctipennis;Phloeonomus punctipennis;1;Phloeonomus  
 punctipennis;1;

KU906389;Coleoptera;Ptilinus pectinicornis;Ptilinus pectinicornis;1;Ptilinus pectinicornis;0.999999999999972;  
 KU906419;Coleoptera;Phloeocharis subtilissima;Phloeocharis subtilissima;NA;Phloeocharis subtilissima;1;  
 KU906462;Coleoptera;Anthaxia nitidula;Anthaxia nitidula;1;Anthaxia nitidula;1;  
 KU906464;Coleoptera;Plagionotus detritus;Plagionotus detritus;1;Plagionotus detritus;0.999999999609798;  
 KU906475;Coleoptera;Exocentrus adspersus;Exocentrus adspersus;1;Exocentrus adspersus;1;  
 KU906506;Coleoptera;Atrecus affinis;Atrecus affinis;1;Atrecus affinis;1;  
 KU906578;Coleoptera;Ptilinus pectinicornis;Ptilinus pectinicornis;1;Ptilinus pectinicornis;1;  
 KU906641;Coleoptera;Valgus hemipterus;Valgus hemipterus;1;Valgus hemipterus;1;  
 KU906649;Coleoptera;Tritoma bipustulata;NA;1;Tritoma bipustulata;1;  
 KU906666;Coleoptera;Eucnemis capucina;Eucnemis capucina;1;Eucnemis capucina;1;  
 KU906745;Coleoptera;Vincenzellus ruficollis;NA;NA;Vincenzellus ruficollis;1;  
 KU906755;Coleoptera;Grammoptera abdominalis;Grammoptera abdominalis;1;Grammoptera abdominalis;1;  
 KU906760;Coleoptera;Pteryx suturalis;NA;NA;Pteryx suturalis;1;  
 KU906781;Coleoptera;Anthaxia helvetica;Anthaxia helvetica;1;Anthaxia helvetica;1;  
 KU906787;Coleoptera;Atrecus affinis;NA;NA;Atrecus affinis;1;  
 KU906796;Coleoptera;Anoplodera sexguttata;Anoplodera sexguttata;1;Anoplodera sexguttata;1;  
 KU906824;Coleoptera;Anthaxia godeti;Anthaxia godeti;1;Anthaxia godeti;1;  
 KU906865;Coleoptera;Aulonothroscus brevicollis;Aulonothroscus brevicollis;1;Aulonothroscus brevicollis;1;  
 KU906880;Coleoptera;Leiopus femoratus;Leiopus femoratus;1;Leiopus femoratus;1;  
 KU906905;Coleoptera;Atrecus affinis;Atrecus affinis;1;Atrecus affinis;1;  
 KU906954;Coleoptera;Hemicoelus nitidus;NA;1;Anobium nitidum;1;  
 KU906979;Coleoptera;Exocentrus adspersus;Exocentrus adspersus;1;Exocentrus adspersus;1;  
 KU907014;Coleoptera;Berginus tamarisci;NA;1;Berginus tamarisci;1;  
 KU907020;Coleoptera;Epuraea unicolor;Epuraea unicolor;1;Epuraea unicolor;0.999999999999972;  
 KU907022;Coleoptera;Platystomos albinus;NA;NA;Platystomos albinus;1;  
 KU907042;Coleoptera;Xylostiba monilicornis;Xylostiba monilicornis;1;Xylostiba monilicornis;1;  
 KU907052;Coleoptera;Bitoma crenata;Bitoma crenata;1;Bitoma crenata;1;  
 KU907068;Coleoptera;Vincenzellus ruficollis;NA;NA;Vincenzellus ruficollis;1;  
 KU907092;Coleoptera;Leptusa pulchella;Leptusa pulchella;1;Leptusa pulchella;1;  
 KU907126;Coleoptera;Phloeocharis subtilissima;Phloeocharis subtilissima;NA;Phloeocharis subtilissima;1;  
 KU907236;Coleoptera;Exocentrus adspersus;Exocentrus adspersus;1;Exocentrus adspersus;1;  
 KU907242;Coleoptera;Potamophilus acuminatus;Potamophilus acuminatus;NA;Potamophilus acuminatus;1;  
 KU907243;Coleoptera;Platystomos albinus;NA;NA;Platystomos albinus;1;  
 KU907248;Coleoptera;Hemicoelus costatus;NA;NA;Anobium fulvicorne;1;  
 KU907272;Coleoptera;Homophthalmus rugicollis;NA;1;Dryophilus rugicollis;1;  
 KU907300;Coleoptera;Xyleborinus saxesenii;Xyleborinus saxesenii;1;Xyleborinus saxesenii;1;  
 KU907301;Coleoptera;Xylostiba bosnica;Xylostiba bosnica;NA;Xylostiba bosnica;1;  
 KU907308;Coleoptera;Latridius minutus;Latridius minutus;1;Latridius minutus;0.999999999973738;  
 KU907327;Coleoptera;Hylurgops palliatus;Hylurgops palliatus;1;Hylurgops palliatus;1;  
 KU907328;Coleoptera;Cis boleti;Cis boleti;1;Cis boleti;1;  
 KU907366;Coleoptera;Phloeocharis subtilissima;Phloeocharis subtilissima;NA;Phloeocharis subtilissima;1;  
 KU907372;Coleoptera;Grammoptera ustulata;Grammoptera ustulata;1;Grammoptera ustulata;1;  
 KU907395;Coleoptera;Platystomos albinus;NA;NA;Platystomos albinus;1;  
 KU907399;Coleoptera;Batrisus formicarius;Batrisus formicarius;1;Batrisus formicarius;1;  
 KU907409;Coleoptera;Anthaxia nitidula;Anthaxia nitidula;1;Anthaxia nitidula;1;  
 KU907431;Coleoptera;Glischrochilus hortensis;Glischrochilus hortensis;1;Glischrochilus hortensis;1;  
 KU907510;Coleoptera;Tritoma bipustulata;NA;1;Tritoma bipustulata;1;  
 KU907519;Coleoptera;Anthaxia podolica;Anthaxia podolica;1;Anthaxia podolica;1;  
 KU907627;Coleoptera;Aulonothroscus brevicollis;Aulonothroscus brevicollis;1;Aulonothroscus brevicollis;1;  
 KU907671;Coleoptera;Tritoma bipustulata;NA;1;Tritoma bipustulata;1;  
 KU907722;Coleoptera;Uloma culinaris;Uloma culinaris;1;Uloma culinaris;1;  
 KU907738;Coleoptera;Cis boleti;Cis boleti;1;Cis boleti;1;  
 KU907743;Coleoptera;Cis castaneus;Cis castaneus;1;Cis castaneus;1;  
 KU907805;Coleoptera;Epuraea terminalis;Epuraea terminalis;NA;Epuraea placida;0.999929985441599;  
 KU907833;Coleoptera;Bibloporus bicolor;Bibloporus bicolor;1;Bibloporus bicolor;0.999999999999829;  
 KU907856;Coleoptera;Axinopalpis gracilis;NA;NA;Axinopalpis gracilis;1;  
 KU907873;Coleoptera;Latridius minutus;Latridius minutus;1;Latridius minutus;0.999999999993065;  
 KU907927;Coleoptera;Hemicoelus costatus;NA;NA;Anobium fulvicorne;1;  
 KU907988;Coleoptera;Bibloporus ultimus;Bibloporus ultimus;1;Bibloporus ultimus;0.999999999999943;  
 KU908000;Coleoptera;Anthaxia helvetica;Anthaxia helvetica;1;Anthaxia helvetica;1;  
 KU908003;Coleoptera;Glischrochilus quadripunctatus;Glischrochilus quadripunctatus;1;Glischrochilus quadripunctatus;0.999999942615718;  
 KU908007;Coleoptera;Uloma culinaris;Uloma culinaris;1;Uloma culinaris;1;  
 KU908045;Coleoptera;Latridius minutus;Latridius minutus;1;Latridius minutus;0.999999999973738;  
 KU908051;Coleoptera;Vincenzellus ruficollis;NA;NA;Vincenzellus ruficollis;1;  
 KU908093;Coleoptera;Cis hispidus;NA;0.317;Cis hispidus;0.99999991378775;

KU908097;Coleoptera;Glischrochilus hortensis;Glischrochilus hortensis;1;Glischrochilus hortensis;1;  
 KU908112;Coleoptera;Potamophilus acuminatus;Potamophilus acuminatus;NA;Potamophilus acuminatus;1;  
 KU908142;Coleoptera;Polygraphus poligraphus;Polygraphus poligraphus;1;Polygraphus poligraphus;0.99999999993719;  
 KU908183;Coleoptera;Anthaxia nitidula;Anthaxia nitidula;1;Anthaxia nitidula;1;  
 KU908206;Coleoptera;Cis comptus;Cis comptus;1;Cis comptus;1;  
 KU908216;Coleoptera;Phloeocharis subtilissima;Phloeocharis subtilissima;NA;Phloeocharis subtilissima;1;  
 KU908225;Coleoptera;Tritoma bipustulata;NA;1;Tritoma bipustulata;1;  
 KU908291;Coleoptera;Tomicus piniperda;NA;NA;Tomicus piniperda;1;  
 KU908299;Coleoptera;Glischrochilus quadriguttatus;Glischrochilus quadriguttatus;1;Glischrochilus quadriguttatus;1;  
 KU908368;Coleoptera;Elateroides dermestoides;NA;1;Elateroides dermestoides;1;  
 KU908381;Coleoptera;Hylastes ater;Hylastes brunneus;1;Hylastes brunneus;0.999999999999972;  
 KU908395;Coleoptera;Tritoma bipustulata;NA;1;Tritoma bipustulata;1;  
 KU908450;Coleoptera;Tritoma bipustulata;NA;1;Tritoma bipustulata;1;  
 KU908459;Coleoptera;Leiopus femoratus;Leiopus femoratus;1;Leiopus femoratus;1;  
 KU908469;Coleoptera;Tomicus piniperda;NA;NA;Tomicus piniperda;1;  
 KU908476;Coleoptera;Valgus hemipterus;Valgus hemipterus;1;Valgus hemipterus;1;  
 KU908483;Coleoptera;Glischrochilus quadriguttatus;Glischrochilus quadriguttatus;1;Glischrochilus quadriguttatus;1;  
 KU908550;Coleoptera;Hymenalia rufipes;Hymenalia rufipes;NA;Hymenalia rufipes;1;  
 KU908574;Coleoptera;Trixagus atticus;Trixagus atticus;1;Trixagus atticus;1;  
 KU908600;Coleoptera;Epuraea variegata;Epuraea variegata;1;Epuraea variegata;0.999999999840242;  
 KU908672;Coleoptera;Epuraea variegata;Epuraea variegata;1;Epuraea variegata;0.99999999911438;  
 KU908691;Coleoptera;Evodinus clathratus;Evodinus clathratus;1;Evodinus clathratus;1;  
 KU908700;Coleoptera;Bibloporus bicolor;Bibloporus bicolor;1;Bibloporus bicolor;0.99999999999858;  
 KU908709;Coleoptera;Grammoptera ruficornis;Grammoptera ruficornis;1;Grammoptera ruficornis;1;  
 KU908781;Coleoptera;Elateroides dermestoides;NA;1;Elateroides dermestoides;1;  
 KU908858;Coleoptera;Bibloporus bicolor;Bibloporus bicolor;1;Bibloporus bicolor;0.99999999999915;  
 KU908860;Coleoptera;Polygraphus poligraphus;Polygraphus poligraphus;1;Polygraphus poligraphus;0.999999999985704;  
 KU908874;Coleoptera;Glischrochilus quadriguttatus;Glischrochilus quadriguttatus;1;Glischrochilus quadriguttatus;1;  
 KU908958;Coleoptera;Tillus elongatus;NA;NA;Tillus elongatus;1;  
 KU908962;Coleoptera;Anisotoma humeralis;Anisotoma humeralis;1;Anisotoma humeralis;0.99999999910727;  
 KU908973;Coleoptera;Euplectus nanus;NA;0.319;NA;0.999999999999995;  
 KU908976;Coleoptera;Glischrochilus hortensis;Glischrochilus hortensis;1;Glischrochilus hortensis;1;  
 KU908979;Coleoptera;Tillus elongatus;NA;NA;Tillus elongatus;1;  
 KU909099;Coleoptera;Anthaxia candens;Anthaxia candens;1;Anthaxia candens;1;  
 KU909150;Coleoptera;Exocentrus adspersus;Exocentrus adspersus;1;Exocentrus adspersus;1;  
 KU909239;Coleoptera;Grammoptera abdominalis;Grammoptera abdominalis;1;Grammoptera abdominalis;1;  
 KU909242;Coleoptera;Phloeonomus minimus;Phloeonomus minimus;NA;Phloeonomus minimus;1;  
 KU909245;Coleoptera;Platystomos albinus;NA;1;Platystomos albinus;1;  
 KU909274;Coleoptera;Grammoptera abdominalis;Grammoptera abdominalis;1;Grammoptera abdominalis;1;  
 KU909292;Coleoptera;Platystomos albinus;NA;1;Platystomos albinus;1;  
 KU909295;Coleoptera;Anthaxia manca;Anthaxia manca;1;Anthaxia manca;1;  
 KU909316;Coleoptera;Agrilus viridis;Agrilus viridis;1;Agrilus viridis;0.99999967150313;  
 KU909320;Coleoptera;Dendrophilus punctatus;NA;1;Dendrophilus punctatus;1;  
 KU909323;Coleoptera;Hemicoelus nitidus;NA;NA;Anobium nitidum;1;  
 KU909348;Coleoptera;Ptilinus pectinicornis;Ptilinus pectinicornis;1;Ptilinus pectinicornis;1;  
 KU909370;Coleoptera;Anthaxia quadripunctata;Anthaxia quadripunctata;1;Anthaxia quadripunctata;1;  
 KU909390;Coleoptera;Ptilinus pectinicornis;Ptilinus pectinicornis;1;Ptilinus pectinicornis;1;  
 KU909427;Coleoptera;Troglops albicans;Troglops albicans;1;Troglops albicans;1;  
 KU909452;Coleoptera;Placusa pumilio;Placusa pumilio;1;Placusa pumilio;1;  
 KU909453;Coleoptera;Grammoptera ruficornis;Grammoptera ruficornis;1;Grammoptera ruficornis;1;  
 KU909456;Coleoptera;Phloeonomus punctipennis;Phloeonomus punctipennis;1;Phloeonomus punctipennis;1;  
 KU909486;Coleoptera;Placusa tachyporoides;Placusa tachyporoides;1;Placusa tachyporoides;0.99999995754933;  
 KU909492;Coleoptera;Exocentrus adspersus;Exocentrus adspersus;1;Exocentrus adspersus;1;  
 KU909509;Coleoptera;Phloeonomus punctipennis;Phloeonomus punctipennis;1;Phloeonomus punctipennis;1;  
 KU909537;Coleoptera;Uloma culinaris;Uloma culinaris;1;Uloma culinaris;1;  
 KU909582;Coleoptera;Anoplodera sexguttata;Anoplodera sexguttata;1;Anoplodera sexguttata;1;  
 KU909583;Coleoptera;Hypnogyra angularis;Hypnogyra glabra;1;Hypnogyra glabra;1;  
 KU909617;Coleoptera;Atrecus affinis;NA;NA;Atrecus affinis;1;  
 KU909673;Coleoptera;Anthaxia nitidula;Anthaxia nitidula;1;Anthaxia nitidula;1;  
 KU909726;Coleoptera;Troglops albicans;Troglops albicans;1;Troglops albicans;1;  
 KU909730;Coleoptera;Epuraea unicolor;Epuraea unicolor;1;Epuraea unicolor;0.999999999999972;  
 KU909737;Coleoptera;Glischrochilus quadripunctatus;Glischrochilus quadripunctatus;0.001;Glischrochilus quadripunctatus;0.9999999497214;

KU909760;Coleoptera;Tillus elongatus;NA;NA;Tillus elongatus;1;  
 KU909832;Coleoptera;Cis festivus;Orthocis festivus;1;Orthocis festivus;1;  
 KU909847;Coleoptera;Euryptilium saxonicum;Euryptilium saxonicum;1;Euryptilium saxonicum;1;  
 KU909849;Coleoptera;Platycerus caraboides;Platycerus caraboides;1;Platycerus caraboides;1;  
 KU909903;Coleoptera;Cis comptus;Cis comptus;1;Cis comptus;1;  
 KU909964;Coleoptera;Leptusa fumida;Leptusa fumida;1;Leptusa fumida;0.999999999999972;  
 KU910110;Coleoptera;Tomicus piniperda;NA;NA;Tomicus piniperda;1;  
 KU910125;Coleoptera;Latridius minutus;Latridius minutus;1;Latridius minutus;0.999999999973738;  
 KU910143;Coleoptera;Grammoptera abdominalis;Grammoptera abdominalis;1;Grammoptera abdominalis;1;  
 KU910200;Coleoptera;Anthaxia quadripunctata;Anthaxia quadripunctata;1;Anthaxia quadripunctata;1;  
 KU910207;Coleoptera;Anthaxia nitidula;Anthaxia nitidula;1;Anthaxia nitidula;1;  
 KU910250;Coleoptera;Aulonothroscus brevicollis;Aulonothroscus brevicollis;1;Aulonothroscus brevicollis;1;  
 KU910276;Coleoptera;Hymenalia rufipes;Hymenalia rufipes;NA;Hymenalia rufipes;1;  
 KU910307;Coleoptera;Aulonium trisulcum;Aulonium trisulcum;1;Aulonium trisulcum;1;  
 KU910422;Coleoptera;Hypnogyra angularis;Hypnogyra glabra;NA;Hypnogyra glabra;1;  
 KU910424;Coleoptera;Bibloporus ultimus;Bibloporus ultimus;1;Bibloporus ultimus;0.999999999999943;  
 KU910429;Coleoptera;Dendrophilus punctatus;NA;1;Dendrophilus punctatus;1;  
 KU910436;Coleoptera;Hylurgops palliatus;Hylurgops palliatus;1;Hylurgops palliatus;1;  
 KU910464;Coleoptera;Atrecus affinis;NA;NA;Atrecus affinis;1;  
 KU910472;Coleoptera;Dendrophilus punctatus;Dendrophilus punctatus;1;Dendrophilus punctatus;1;  
 KU910474;Coleoptera;Euryptilium saxonicum;Euryptilium saxonicum;1;Euryptilium saxonicum;1;  
 KU910477;Coleoptera;Vincenzellus ruficollis;Vincenzellus ruficollis;1;Vincenzellus ruficollis;1;  
 KU910509;Coleoptera;Xyleborus dryographus;Xyleborus dryographus;1;Xyleborus dryographus;0.999999999999602;  
 KU910541;Coleoptera;Anisotoma humeralis;Anisotoma humeralis;1;Anisotoma humeralis;0.999999999966832;  
 KU910553;Coleoptera;Exocentrus adspersus;NA;NA;Exocentrus adspersus;1;  
 KU910607;Coleoptera;Tritoma bipustulata;NA;1;Tritoma bipustulata;1;  
 KU910612;Coleoptera;Gnathotrichus materiarius;Gnathotrichus materiarius;1;Gnathotrichus materiarius;1;  
 KU910664;Coleoptera;Pteryx suturalis;Pteryx suturalis;NA;Pteryx suturalis;1;  
 KU910678;Coleoptera;Leiopus nebulosus;NA;0.12;Leiopus linnei;0.911840242395976;  
 KU910701;Coleoptera;Uloa culinaris;Uloa culinaris;1;Uloa culinaris;1;  
 KU910711;Coleoptera;Homalota plana;NA;NA;Homalota plana;1;  
 KU910753;Coleoptera;Dendrophilus pygmaeus;NA;1;Dendrophilus pygmaeus;1;  
 KU910786;Coleoptera;Anthaxia mendizabali;Anthaxia mendizabali;1;Anthaxia mendizabali;1;  
 KU910789;Coleoptera;Epuraea unicolor;Epuraea unicolor;1;Epuraea unicolor;0.999999999999972;  
 KU910795;Coleoptera;Aulonium trisulcum;Aulonium trisulcum;1;Aulonium trisulcum;1;  
 KU910814;Coleoptera;Troglops albicans;Troglops albicans;NA;Troglops albicans;1;  
 KU910829;Coleoptera;Hololepta plana;Hololepta plana;1;Hololepta plana;1;  
 KU910839;Coleoptera;Exocentrus lusitanus;Exocentrus lusitanus;1;Exocentrus lusitanus;1;  
 KU910885;Coleoptera;Agrilus viridis;Agrilus viridis;1;Agrilus viridis;0.999999232154419;  
 KU910908;Coleoptera;Cis boleti;Cis boleti;1;Cis boleti;1;  
 KU910934;Coleoptera;Triplax lepida;Triplax lepida;1;Triplax lepida;1;  
 KU910935;Coleoptera;Aulonothroscus brevicollis;Aulonothroscus brevicollis;1;Aulonothroscus brevicollis;1;  
 KU910943;Coleoptera;Phloeonomus punctipennis;Phloeonomus punctipennis;1;Phloeonomus punctipennis;1;  
 KU910945;Coleoptera;Euplectus karstenii;Euplectus karstenii;1;Euplectus karstenii;1;  
 KU910970;Coleoptera;Tritoma bipustulata;NA;1;Tritoma bipustulata;1;  
 KU910997;Coleoptera;Vincenzellus ruficollis;NA;NA;Vincenzellus ruficollis;1;  
 KU911006;Coleoptera;Exocentrus adspersus;NA;NA;Exocentrus adspersus;1;  
 KU911088;Coleoptera;Hylastes ater;Hylastes ater;1;Hylastes ater;0.999999999999858;  
 KU911107;Coleoptera;Glischrochilus quadriguttatus;Glischrochilus quadriguttatus;1;Glischrochilus quadriguttatus;1;  
 KU911123;Coleoptera;Hypnogyra angularis;Hypnogyra glabra;1;Hypnogyra glabra;1;  
 KU911226;Coleoptera;Xyleborinus saxesenii;NA;0.152;Xyleborinus saxesenii;0.999993637230154;  
 KU911306;Coleoptera;Vincenzellus ruficollis;Vincenzellus ruficollis;1;Vincenzellus ruficollis;1;  
 KU911312;Coleoptera;Grammoptera ruficornis;NA;NA;Grammoptera ruficornis;1;  
 KU911346;Coleoptera;Exocentrus adspersus;Exocentrus adspersus;1;Exocentrus adspersus;1;  
 KU911347;Coleoptera;Hololepta plana;Hololepta plana;1;Hololepta plana;1;  
 KU911348;Coleoptera;Glischrochilus hortensis;Glischrochilus hortensis;1;Glischrochilus hortensis;1;  
 KU911359;Coleoptera;Exocentrus adspersus;Exocentrus adspersus;1;Exocentrus adspersus;1;  
 KU911366;Coleoptera;Glischrochilus quadriguttatus;Glischrochilus quadriguttatus;1;Glischrochilus quadriguttatus;1;  
 KU911430;Coleoptera;Anthaxia quadripunctata;Anthaxia quadripunctata;1;Anthaxia quadripunctata;1;  
 KU911567;Coleoptera;Trixagus leseigneuri;Trixagus leseigneuri;1;Trixagus leseigneuri;1;  
 KU911568;Coleoptera;Trypodendron domesticum;Trypodendron domesticum;1;Trypodendron domesticum;1;  
 KU911660;Coleoptera;Grammoptera ruficornis;NA;NA;Grammoptera ruficornis;1;  
 KU911724;Coleoptera;Dendrophilus pygmaeus;NA;1;Dendrophilus pygmaeus;1;  
 KU911808;Coleoptera;Grammoptera ustulata;Grammoptera ustulata;1;Grammoptera ustulata;1;  
 KU911821;Coleoptera;Anthaxia nitidula;Anthaxia nitidula;1;Anthaxia nitidula;1;  
 KU911936;Coleoptera;Anisotoma humeralis;Anisotoma humeralis;1;Anisotoma humeralis;0.999999999871534;

KU911943;Coleoptera;Anisotoma humeralis;Anisotoma humeralis;1;Anisotoma humeralis;0.999999999966832;  
KU911949;Coleoptera;Anthaxia nitidula;Anthaxia nitidula;1;Anthaxia nitidula;1;  
KU911952;Coleoptera;Ernobius abietis;NA;1;Ernobius abietis;1;  
KU911988;Coleoptera;Ptilinus pectinicornis;Ptilinus pectinicornis;1;Ptilinus pectinicornis;1;  
KU912007;Coleoptera;Xylostiba bosnica;Xylostiba bosnica;NA;Xylostiba bosnica;1;  
KU912021;Coleoptera;Epuraea unicolor;Epuraea unicolor;1;Epuraea unicolor;1;  
KU912046;Coleoptera;Euryusa castanoptera;Euryusa castanoptera;1;Euryusa castanoptera;1;  
KU912067;Coleoptera;Xyleborinus saxesenii;Xyleborinus saxesenii;1;Xyleborinus saxesenii;1;  
KU912074;Coleoptera;Euplectus nanus;NA;0.319;NA;0.999999999999995;  
KU912122;Coleoptera;Platycerus caraboides;Platycerus caraboides;1;Platycerus caraboides;1;  
KU912168;Coleoptera;Euplectus nanus;NA;0.319;NA;0.999999999999995;  
KU912180;Coleoptera;Hymenalia rufipes;Hymenalia rufipes;NA;Hymenalia rufipes;1;  
KU912183;Coleoptera;Cis boleti;Cis boleti;1;Cis boleti;1;  
KU912192;Coleoptera;Vincenzellus ruficollis;NA;NA;Vincenzellus ruficollis;1;  
KU912220;Coleoptera;Exocentrus adspersus;Exocentrus adspersus;1;Exocentrus adspersus;1;  
KU912222;Coleoptera;Hololepta plana;Hololepta plana;1;Hololepta plana;1;  
KU912345;Coleoptera;Pteryx suturalis;Pteryx suturalis;1;Pteryx suturalis;1;  
KU912414;Coleoptera;Cis boleti;Cis boleti;1;Cis boleti;1;  
KU912452;Coleoptera;Xyleborinus saxesenii;NA;0.152;Xyleborinus saxesenii;0.999993637230154;  
KU912478;Coleoptera;Anthaxia nitidula;Anthaxia nitidula;1;Anthaxia nitidula;1;  
KU912481;Coleoptera;Anisotoma orbicularis;Anisotoma orbicularis;1;Anisotoma orbicularis;1;  
KU912524;Coleoptera;Axinopalpis gracilis;NA;NA;Axinopalpis gracilis;1;  
KU912535;Coleoptera;Valgus hemipterus;Valgus hemipterus;NA;Valgus hemipterus;1;  
KU912555;Coleoptera;Ptilinus fuscus;Ptilinus fuscus;1;Ptilinus fuscus;1;  
KU912603;Coleoptera;Placusa tachyporoides;Placusa tachyporoides;1;Placusa tachyporoides;0.999999995754933;  
KU912609;Coleoptera;Glischrochilus hortensis;Glischrochilus hortensis;1;Glischrochilus hortensis;1;  
KU912613;Coleoptera;Euryusa optabilis;Euryusa optabilis;1;Euryusa optabilis;0.99999999997533;  
KU912632;Coleoptera;Hemicoelus nitidus;Anobium nitidum;1;Anobium nitidum;1;  
KU912650;Coleoptera;Glischrochilus quadripunctatus;Glischrochilus quadripunctatus;0.002;Glischrochilus quadripunctatus;0.99999985966475;  
KU912724;Coleoptera;Trixagus carinifrons;Trixagus carinifrons;1;Trixagus carinifrons;1;  
KU912741;Coleoptera;Glischrochilus quadripunctatus;Glischrochilus quadripunctatus;0.002;Glischrochilus quadripunctatus;0.999999938086889;  
KU912750;Coleoptera;Grammoptera ruficornis;NA;NA;Grammoptera ruficornis;1;  
KU912818;Coleoptera;Gnathotrichus materiarius;Gnathotrichus materiarius;1;Gnathotrichus materiarius;1;  
KU912840;Coleoptera;Plegaderus caesus;Plegaderus caesus;1;Plegaderus caesus;1;  
KU912848;Coleoptera;Dendrophilus punctatus;NA;1;Dendrophilus punctatus;1;  
KU912872;Coleoptera;Phloeonomus punctipennis;Phloeonomus punctipennis;NA;Phloeonomus punctipennis;1;  
KU912907;Coleoptera;Grammoptera ustulata;Grammoptera ustulata;1;Grammoptera ustulata;1;  
KU912931;Coleoptera;Elateroides dermestoides;NA;1;Elateroides dermestoides;1;  
KU912942;Coleoptera;Potamophilus acuminatus;Potamophilus acuminatus;NA;Potamophilus acuminatus;1;  
KU912968;Coleoptera;Anthaxia quadripunctata;Anthaxia quadripunctata;1;Anthaxia quadripunctata;1;  
KU912981;Coleoptera;Glischrochilus quadriguttatus;Glischrochilus quadriguttatus;1;Glischrochilus quadriguttatus;1;  
KU912989;Coleoptera;Polygraphus grandiclava;Polygraphus grandiclava;1;Polygraphus grandiclava;0.999999997098428;  
KU913002;Coleoptera;Platystomos albinus;NA;1;Platystomos albinus;1;  
KU913055;Coleoptera;Anthaxia nitidula;Anthaxia nitidula;1;Anthaxia nitidula;1;  
KU913075;Coleoptera;Hypoganus inunctus;Hypoganus inunctus;1;Hypoganus inunctus;1;  
KU913083;Coleoptera;Pteryngium crenatum;Pteryngium crenatum;1;Pteryngium crenatum;1;  
KU913104;Coleoptera;Atrecus affinis;NA;NA;Atrecus affinis;1;  
KU913178;Coleoptera;Placusa tachyporoides;Placusa tachyporoides;1;Placusa tachyporoides;0.999999995754933;  
KU913232;Coleoptera;Elateroides dermestoides;NA;1;Elateroides dermestoides;1;  
KU913264;Coleoptera;Grammoptera ruficornis;Grammoptera ruficornis;NA;Grammoptera ruficornis;0.999999999999545;  
KU913311;Coleoptera;Tritoma bipustulata;NA;1;Tritoma bipustulata;1;  
KU913323;Coleoptera;Triplax russica;Triplax russica;1;Triplax russica;1;  
KU913459;Coleoptera;Denticollis linearis;Denticollis linearis;1;Denticollis linearis;1;  
KU913483;Coleoptera;Trixagus atticus;Trixagus atticus;1;Trixagus atticus;1;  
KU913495;Coleoptera;Exocentrus adspersus;Exocentrus adspersus;1;Exocentrus adspersus;1;  
KU913515;Coleoptera;Potamophilus acuminatus;Potamophilus acuminatus;NA;Potamophilus acuminatus;1;  
KU913604;Coleoptera;Glischrochilus quadripunctatus;Glischrochilus quadripunctatus;1;Glischrochilus quadripunctatus;0.953174474849839;  
KU913803;Coleoptera;Xestobium rufovillosum;NA;1;Xestobium rufovillosum;1;  
KU913831;Coleoptera;Cis festinus;NA;NA;Orthocis festinus;1;  
KU913834;Coleoptera;Phloeonomus punctipennis;Phloeonomus punctipennis;1;Phloeonomus punctipennis;1;  
KU913839;Coleoptera;Plegaderus caesus;Plegaderus caesus;1;Plegaderus caesus;1;  
KU913850;Coleoptera;Euplectus nanus;NA;0.319;NA;0.999999999999995;

KU913875;Coleoptera;Phloeocharis subtilissima;Phloeocharis subtilissima;1;Phloeocharis subtilissima;1;  
 KU913892;Coleoptera;Phloeonomus punctipennis;Phloeonomus punctipennis;NA;Phloeonomus punctipennis;1;  
 KU913934;Coleoptera;Anisotoma castanea;Anisotoma castanea;1;Anisotoma castanea;0.999999999997783;  
 KU913941;Coleoptera;Polygraphus poligraphus;Polygraphus poligraphus;1;Polygraphus poligraphus;0.999999999996163;  
 KU913956;Coleoptera;Dendrophilus punctatus;NA;1;Dendrophilus punctatus;1;  
 KU913962;Coleoptera;Xylostiba monilicornis;Xylostiba monilicornis;NA;Xylostiba monilicornis;1;  
 KU913977;Coleoptera;Denticollis linearis;Denticollis linearis;1;Denticollis linearis;1;  
 KU913994;Coleoptera;Cis glabratus;Cis glabratus;1;Cis glabratus;1;  
 KU914039;Coleoptera;Epuraea unicolor;Epuraea unicolor;1;Epuraea unicolor;0.999999999999972;  
 KU914053;Coleoptera;Pteryx suturalis;Pteryx suturalis;1;Pteryx suturalis;1;  
 KU914083;Coleoptera;Plectophloeus nubigena;Plectophloeus nubigena;1;Plectophloeus nubigena;1;  
 KU914088;Coleoptera;Anthaxia helvetica;Anthaxia helvetica;1;Anthaxia helvetica;1;  
 KU914123;Coleoptera;Pteryx suturalis;Pteryx suturalis;1;Pteryx suturalis;1;  
 KU914127;Coleoptera;Vincenzellus ruficollis;NA;NA;Vincenzellus ruficollis;1;  
 KU914161;Coleoptera;Exocentrus lusitanus;Exocentrus lusitanus;1;Exocentrus lusitanus;1;  
 KU914173;Coleoptera;Anthaxia hungarica;Anthaxia hungarica;1;Anthaxia hungarica;1;  
 KU914189;Coleoptera;Vincenzellus ruficollis;NA;NA;Vincenzellus ruficollis;1;  
 KU914191;Coleoptera;Leptusa fumida;Leptusa fumida;1;Leptusa fumida;1;  
 KU914227;Coleoptera;Grammoptera ruficornis;Grammoptera ruficornis;1;Grammoptera ruficornis;1;  
 KU914233;Coleoptera;Uloma culinaris;Uloma culinaris;1;Uloma culinaris;1;  
 KU914257;Coleoptera;Cis festivus;Orthocis festivus;1;Orthocis festivus;1;  
 KU914357;Coleoptera;Euplectus karstenii;Euplectus karstenii;1;Euplectus karstenii;1;  
 KU914363;Coleoptera;Valgus hemipterus;Valgus hemipterus;NA;Valgus hemipterus;1;  
 KU914405;Coleoptera;Triplax russica;Triplax russica;1;Triplax russica;1;  
 KU914485;Coleoptera;Tritoma bipustulata;NA;1;Tritoma bipustulata;1;  
 KU914569;Coleoptera;Vincenzellus ruficollis;NA;NA;Vincenzellus ruficollis;1;  
 KU914572;Coleoptera;Elateroides dermestoides;Elateroides dermestoides;1;Elateroides dermestoides;1;  
 KU914590;Coleoptera;Triplax russica;Triplax russica;1;Triplax russica;1;  
 KU914597;Coleoptera;Hylastes ater;Hylastes ater;1;Hylastes ater;0.999999999999687;  
 KU914631;Coleoptera;Polygraphus poligraphus;Polygraphus poligraphus;1;Polygraphus poligraphus;0.999999999995225;  
 KU914636;Coleoptera;Anthaxia nitidula;Anthaxia nitidula;1;Anthaxia nitidula;1;  
 KU914686;Coleoptera;Cis hispidus;NA;NA;Cis hispidus;0.999999952719493;  
 KU914687;Coleoptera;Hypoganus inunctus;Hypoganus inunctus;1;Hypoganus inunctus;1;  
 KU914714;Coleoptera;Aulonium trisulcum;NA;NA;Aulonium trisulcum;1;  
 KU914729;Coleoptera;Cis boleti;Cis boleti;1;Cis boleti;1;  
 KU914735;Coleoptera;Anthaxia helvetica;Anthaxia helvetica;1;Anthaxia helvetica;1;  
 KU914744;Coleoptera;Cis comptus;Cis comptus;1;Cis comptus;1;  
 KU914779;Coleoptera;Aulonothroscus brevicollis;Aulonothroscus brevicollis;1;Aulonothroscus brevicollis;1;  
 KU914837;Coleoptera;Plagionotus arcuatus;Plagionotus arcuatus;1;Plagionotus arcuatus;0.999999998658836;  
 KU914845;Coleoptera;Anthaxia morio;Anthaxia morio;1;Anthaxia morio;1;  
 KU914909;Coleoptera;Tritoma bipustulata;NA;1;Tritoma bipustulata;1;  
 KU914957;Coleoptera;Atrecus affinis;NA;NA;Atrecus affinis;1;  
 KU915009;Coleoptera;Trypodendron domesticum;Trypodendron domesticum;1;Trypodendron domesticum;1;  
 KU915028;Coleoptera;Vincenzellus ruficollis;NA;NA;Vincenzellus ruficollis;1;  
 KU915066;Coleoptera;Dendrophilus punctatus;NA;1;Dendrophilus punctatus;1;  
 KU915087;Coleoptera;Glischrochilus hortensis;Glischrochilus hortensis;1;Glischrochilus hortensis;1;  
 KU915090;Coleoptera;Anisotoma humeralis;Anisotoma humeralis;1;Anisotoma humeralis;0.99999999373927;  
 KU915094;Coleoptera;Vincenzellus ruficollis;NA;NA;Vincenzellus ruficollis;1;  
 KU915106;Coleoptera;Phloeonomus minimus;Phloeonomus minimus;1;Phloeonomus minimus;1;  
 KU915167;Coleoptera;Grammoptera ustulata;Grammoptera ustulata;1;Grammoptera ustulata;1;  
 KU915174;Coleoptera;Euplectus nanus;NA;0.319;NA;0.999999999999995;  
 KU915192;Coleoptera;Agrilus viridis;Agrilus viridis;1;Agrilus viridis;0.999999824276231;  
 KU915193;Coleoptera;Agrilus viridis;Agrilus viridis;1;Agrilus viridis;0.999999262134497;  
 KU915258;Coleoptera;Cis glabratus;Cis glabratus;1;Cis glabratus;1;  
 KU915262;Coleoptera;Triplax lepida;Triplax lepida;1;Triplax lepida;1;  
 KU915263;Coleoptera;Glischrochilus hortensis;Glischrochilus hortensis;1;Glischrochilus hortensis;1;  
 KU915264;Coleoptera;Anthaxia nitidula;Anthaxia nitidula;1;Anthaxia nitidula;1;  
 KU915290;Coleoptera;Leiopus nebulosus;NA;0.12;Leiopus linnei;0.911840242395976;  
 KU915302;Coleoptera;Anthaxia candens;Anthaxia candens;1;Anthaxia candens;1;  
 KU915334;Coleoptera;Euplectus nanus;NA;0.045;Euplectus nanus;0.819242315019459;  
 KU915338;Coleoptera;Hypulus quercinus;Hypulus quercinus;1;Hypulus quercinus;1;  
 KU915392;Coleoptera;Ptilinus pectinicornis;Ptilinus pectinicornis;1;Ptilinus pectinicornis;1;  
 KU915405;Coleoptera;Grammoptera ruficornis;NA;NA;Grammoptera ruficornis;1;  
 KU915462;Coleoptera;Phloeonomus punctipennis;Phloeonomus punctipennis;1;Phloeonomus punctipennis;1;  
 KU915464;Coleoptera;Anisotoma orbicularis;Anisotoma orbicularis;1;Anisotoma orbicularis;1;

KU915487;Coleoptera;Ptilinus pectinicornis;Ptilinus pectinicornis;1;Ptilinus pectinicornis;0.999999999999972;  
KU915511;Coleoptera;Troglops albicans;Troglops albicans;NA;Troglops albicans;1;  
KU915512;Coleoptera;Hypebaeus flavipes;Hypebaeus flavipes;1;Hypebaeus flavipes;1;  
KU915537;Coleoptera;Ernobius abietis;Ernobius abietis;1;Ernobius abietis;1;  
KU915557;Coleoptera;Xylotrechus arvicola;Xylotrechus arvicola;1;Xylotrechus arvicola;0.999999994925048;  
KU915564;Coleoptera;Hymenalia rufipes;Hymenalia rufipes;1;Hymenalia rufipes;1;  
KU915577;Coleoptera;Phloeocharis subtilissima;Phloeocharis subtilissima;NA;Phloeocharis subtilissima;1;  
KU915586;Coleoptera;Grammoptera ruficornis;Grammoptera ruficornis;1;Grammoptera ruficornis;1;  
KU915590;Coleoptera;Pteryx suturalis;Pteryx suturalis;1;Pteryx suturalis;1;  
KU915597;Coleoptera;Grammoptera ruficornis;Grammoptera ruficornis;1;Grammoptera ruficornis;1;  
KU915600;Coleoptera;Anthaxia helvetica;Anthaxia helvetica;1;Anthaxia helvetica;1;  
KU915607;Coleoptera;Exocentrus adspersus;Exocentrus adspersus;1;Exocentrus adspersus;1;  
KU915631;Coleoptera;Grammoptera ruficornis;Grammoptera ruficornis;1;Grammoptera ruficornis;1;  
KU915676;Coleoptera;Euryusa optabilis;Euryusa optabilis;1;Euryusa optabilis;0.999999999320892;  
KU915695;Coleoptera;Hypnogyra angularis;Hypnogyra glabra;NA;Hypnogyra glabra;1;  
KU915703;Coleoptera;Triplax lepida;Triplax lepida;1;Triplax lepida;1;  
KU915724;Coleoptera;Pteryx suturalis;NA;NA;Pteryx suturalis;1;  
KU915794;Coleoptera;Euplectus nanus;NA;0.319;NA;0.999999999999995;  
KU915796;Coleoptera;Anthaxia quadripunctata;Anthaxia quadripunctata;1;Anthaxia quadripunctata;1;  
KU915799;Coleoptera;Elateroides dermestoides;Elateroides dermestoides;1;Elateroides dermestoides;1;  
KU915837;Coleoptera;Plectophloeus nubigena;Plectophloeus nubigena;1;Plectophloeus nubigena;1;  
KU915859;Coleoptera;Tillus elongatus;Tillus elongatus;1;Tillus elongatus;1;  
KU915923;Coleoptera;Euplectus nanus;NA;0.323;NA;100.000.000.000.001;  
KU915979;Coleoptera;Bibloporus bicolor;Bibloporus bicolor;1;Bibloporus bicolor;0.999999999999829;  
KU915995;Coleoptera;Pteryx suturalis;NA;NA;Pteryx suturalis;1;  
KU916048;Coleoptera;Tomicus piniperda;Tomicus piniperda;NA;Tomicus piniperda;1;  
KU916115;Coleoptera;Evodinus clathratus;Evodinus clathratus;1;Evodinus clathratus;1;  
KU916116;Coleoptera;Hypebaeus flavipes;Hypebaeus flavipes;1;Hypebaeus flavipes;1;  
KU916137;Coleoptera;Anthaxia manca;Anthaxia manca;1;Anthaxia manca;1;  
KU916139;Coleoptera;Epuraea unicolor;Epuraea unicolor;1;Epuraea unicolor;0.999999999999972;  
KU916158;Coleoptera;Pteryngium crenatum;Pteryngium crenatum;1;Pteryngium crenatum;1;  
KU916250;Coleoptera;Anisoxya fuscata;Anisoxya fuscata;1;Anisoxya fuscata;0.999999999445578;  
KU916299;Coleoptera;Xyleborinus saxeseni;Xyleborinus saxeseni;1;Xyleborinus saxeseni;1;  
KU916300;Coleoptera;Hymenalia rufipes;Hymenalia rufipes;NA;Hymenalia rufipes;1;  
KU916352;Coleoptera;Triplax rufipes;Triplax rufipes;1;Triplax rufipes;1;  
KU916362;Coleoptera;Vincenzellus ruficollis;NA;NA;Vincenzellus ruficollis;1;  
KU916393;Coleoptera;Denticollis linearis;Denticollis linearis;1;Denticollis linearis;1;  
KU916410;Coleoptera;Hemicoelus costatus;NA;NA;Anobium fulvicorne;1;  
KU916466;Coleoptera;Anisotoma humeralis;Anisotoma humeralis;1;Anisotoma humeralis;0.99999999996832;  
KU916489;Coleoptera;Vincenzellus ruficollis;NA;NA;Vincenzellus ruficollis;1;  
KU916498;Coleoptera;Euplectus karstenii;Euplectus karstenii;1;Euplectus karstenii;1;  
KU916501;Coleoptera;Bitoma crenata;Bitoma crenata;1;Bitoma crenata;1;  
KU916515;Coleoptera;Elateroides dermestoides;NA;1;Elateroides dermestoides;1;  
KU916540;Coleoptera;Vincenzellus ruficollis;NA;NA;Vincenzellus ruficollis;1;  
KU916626;Coleoptera;Hemicoelus nitidus;Anobium nitidum;NA;Anobium nitidum;1;  
KU916651;Coleoptera;Priobium carpini;Priobium carpini;1;Priobium carpini;1;  
KU916657;Coleoptera;Homophthalmus rugicollis;Dryophilus rugicollis;1;Dryophilus rugicollis;1;  
KU916659;Coleoptera;Uloma culinaris;Uloma culinaris;1;Uloma culinaris;1;  
KU916692;Coleoptera;Cis hispidus;NA;0.317;Cis hispidus;0.99999991378775;  
KU916713;Coleoptera;Denticollis linearis;Denticollis linearis;1;Denticollis linearis;1;  
KU916734;Coleoptera;Cis hispidus;NA;0.317;Cis hispidus;0.99999991378775;  
KU916743;Coleoptera;Glischrochilus quadriguttatus;Glischrochilus quadriguttatus;1;Glischrochilus quadriguttatus;1;  
KU916752;Coleoptera;Anisotoma orbicularis;Anisotoma orbicularis;1;Anisotoma orbicularis;1;  
KU916795;Coleoptera;Bibloporus bicolor;Bibloporus bicolor;1;Bibloporus bicolor;0.999999999999943;  
KU916854;Coleoptera;Exocentrus lusitanus;Exocentrus lusitanus;1;Exocentrus lusitanus;1;  
KU916907;Coleoptera;Latridius minutus;Latridius minutus;1;Latridius minutus;0.999999999986045;  
KU916925;Coleoptera;Denticollis linearis;Denticollis linearis;1;Denticollis linearis;1;  
KU916936;Coleoptera;Hemicoelus nitidus;NA;1;Anobium nitidum;1;  
KU916965;Coleoptera;Valgus hemipterus;Valgus hemipterus;1;Valgus hemipterus;1;  
KU916995;Coleoptera;Tritoma bipustulata;NA;1;Tritoma bipustulata;1;  
KU917005;Coleoptera;Phloeocharis subtilissima;Phloeocharis subtilissima;1;Phloeocharis subtilissima;1;  
KU917015;Coleoptera;Grammoptera ustulata;Grammoptera ustulata;1;Grammoptera ustulata;1;  
KU917109;Coleoptera;Tritoma bipustulata;NA;1;Tritoma bipustulata;1;  
KU917111;Coleoptera;Leiopus nebulosus;NA;0.12;Leiopus linnei;0.911840242395976;  
KU917132;Coleoptera;Anthaxia nitidula;Anthaxia nitidula;1;Anthaxia nitidula;1;  
KU917151;Coleoptera;Trixagus duvalii;NA;NA;NA;0.999999999999998;  
KU917309;Coleoptera;Zilora obscura;Zilora obscura;1;Zilora obscura;1;  
KU917322;Coleoptera;Pteryx suturalis;NA;NA;Pteryx suturalis;1;  
KU917336;Coleoptera;Evodinus clathratus;Evodinus clathratus;1;Evodinus clathratus;1;

KU917368;Coleoptera;Cis boleti;Cis boleti;1;Cis boleti;1;  
KU917376;Coleoptera;Hypnogyra angularis;Hypnogyra glabra;1;Hypnogyra glabra;1;  
KU917408;Coleoptera;Hylastes ater;Hylastes ater;1;Hylastes ater;0.999999999999773;  
KU917431;Coleoptera;Pteryngium crenatum;Pteryngium crenatum;1;Pteryngium crenatum;1;  
KU917443;Coleoptera;Euplectus karstenii;Euplectus karstenii;1;Euplectus karstenii;1;  
KU917458;Coleoptera;Anthaxia quadripunctata;Anthaxia quadripunctata;1;Anthaxia quadripunctata;1;  
KU917500;Coleoptera;Tomicus piniperda;NA;NA;Tomicus piniperda;1;  
KU917556;Coleoptera;Triplax russica;Triplax russica;1;Triplax russica;1;  
KU917564;Coleoptera;Anthaxia quadripunctata;Anthaxia quadripunctata;1;Anthaxia quadripunctata;1;  
KU917581;Coleoptera;Dendrophilus pygmaeus;NA;1;Dendrophilus pygmaeus;1;  
KU917618;Coleoptera;Placusa tachyporoides;Placusa tachyporoides;1;Placusa tachyporoides;0.999999995754933;  
KU917622;Coleoptera;Polygraphus poligraphus;Polygraphus poligraphus;1;Polygraphus poligraphus;0.999999999993719;  
KU917652;Coleoptera;Xylostiba monilicornis;Xylostiba monilicornis;1;Xylostiba monilicornis;1;  
KU917658;Coleoptera;Valgus hemipterus;Valgus hemipterus;1;Valgus hemipterus;1;  
KU917701;Coleoptera;Cis boleti;Cis boleti;1;Cis boleti;1;  
KU917709;Coleoptera;Tillus elongatus;NA;NA;Tillus elongatus;1;  
KU917759;Coleoptera;Glischrochilus hortensis;Glischrochilus hortensis;1;Glischrochilus hortensis;1;  
KU917776;Coleoptera;Platystomos albinus;NA;NA;Platystomos albinus;1;  
KU917790;Coleoptera;Phloeonomus punctipennis;Phloeonomus punctipennis;1;Phloeonomus punctipennis;1;  
KU917807;Coleoptera;Hemicoelus nitidus;Anobium nitidum;1;Anobium nitidum;1;  
KU917873;Coleoptera;Cis hispidus;NA;NA;Cis hispidus;0.999999946277599;  
KU917897;Coleoptera;Epuraea variegata;Epuraea variegata;1;Epuraea variegata;0.99999999840242;  
KU917925;Coleoptera;Hypnogyra angularis;Hypnogyra glabra;1;Hypnogyra glabra;1;  
KU918052;Coleoptera;Trypodendron domesticum;Trypodendron domesticum;1;Trypodendron domesticum;1;  
KU918101;Coleoptera;Platycerus caraboides;Platycerus caraboides;1;Platycerus caraboides;1;  
KU918126;Coleoptera;Potamophilus acuminatus;Potamophilus acuminatus;NA;Potamophilus acuminatus;1;  
KU918175;Coleoptera;Atrecus affinis;NA;NA;Atrecus affinis;1;  
KU918177;Coleoptera;Tritoma bipustulata;NA;1;Tritoma bipustulata;1;  
KU918269;Coleoptera;Tillus elongatus;NA;NA;Tillus elongatus;1;  
KU918318;Coleoptera;Eledona agricola;Eledona agricola;0.014;Eledona agricola;1;  
KU918334;Coleoptera;Valgus hemipterus;Valgus hemipterus;1;Valgus hemipterus;1;  
KU918353;Coleoptera;Dendrophilus punctatus;Dendrophilus punctatus;1;Dendrophilus punctatus;1;  
KU918362;Coleoptera;Anisotoma humeralis;Anisotoma humeralis;1;Anisotoma humeralis;0.999999999871534;  
KU918379;Coleoptera;Triplax lepida;Triplax lepida;1;Triplax lepida;1;  
KU918380;Coleoptera;Polygraphus poligraphus;Polygraphus poligraphus;1;Polygraphus poligraphus;0.999999999993719;  
KU918396;Coleoptera;Ernobius abietinus;Ernobius abietinus;1;Ernobius abietinus;1;  
KU918446;Coleoptera;Hymenalia rufipes;Hymenalia rufipes;NA;Hymenalia rufipes;1;  
KU918467;Coleoptera;Bibloporus bicolor;Bibloporus bicolor;1;Bibloporus bicolor;0.99999999999915;  
KU918508;Coleoptera;Plectophloeus nubigena;Plectophloeus nubigena;1;Plectophloeus nubigena;1;  
KU918535;Coleoptera;Epuraea terminalis;Epuraea terminalis;NA;Epuraea placida;0.999963904637439;  
KU918562;Coleoptera;Cis boleti;Cis boleti;1;Cis boleti;1;  
KU918606;Coleoptera;Plectophloeus nubigena;Plectophloeus nubigena;1;Plectophloeus nubigena;0.99999999999972;  
KU918607;Coleoptera;Cis hispidus;NA;0.317;Cis hispidus;0.99999991378775;  
KU918636;Coleoptera;Tritoma bipustulata;NA;1;Tritoma bipustulata;1;  
KU918649;Coleoptera;Cis dentatus;Cis dentatus;1;Cis dentatus;1;  
KU918668;Coleoptera;Euryusa castanoptera;Euryusa castanoptera;NA;Euryusa castanoptera;1;  
KU918672;Coleoptera;Anisotoma castanea;Anisotoma castanea;1;Anisotoma castanea;0.99999999999375;  
KU918748;Coleoptera;Elateroides dermestoides;Elateroides dermestoides;1;Elateroides dermestoides;1;  
KU918795;Coleoptera;Denticollis linearis;Denticollis linearis;1;Denticollis linearis;1;  
KU918858;Coleoptera;Denticollis linearis;Denticollis linearis;1;Denticollis linearis;1;  
KU918927;Coleoptera;Phloeonomus pusillus;Phloeonomus pusillus;1;Phloeonomus pusillus;1;  
KU918937;Coleoptera;Euryusa optabilis;Euryusa optabilis;1;Euryusa optabilis;0.99999999980588;  
KU918938;Coleoptera;Hemicoelus nitidus;NA;1;Anobium nitidum;1;  
KU918943;Coleoptera;Platystomos albinus;NA;1;Platystomos albinus;1;  
KU918944;Coleoptera;Xylotrechus antilope;Xylotrechus antilope;1;Xylotrechus antilope;1;  
KU918948;Coleoptera;Tritoma bipustulata;NA;1;Tritoma bipustulata;1;  
KU918972;Coleoptera;Platystomos albinus;NA;NA;Platystomos albinus;1;  
KU919036;Coleoptera;Platystomos albinus;NA;NA;Platystomos albinus;1;  
KU919050;Coleoptera;Elateroides dermestoides;Elateroides dermestoides;1;Elateroides dermestoides;1;  
KU919092;Coleoptera;Xyleborinus saxesenii;Xyleborinus saxesenii;1;Xyleborinus saxesenii;1;  
KU919100;Coleoptera;Anthaxia helvetica;Anthaxia helvetica;1;Anthaxia helvetica;1;  
KU919167;Coleoptera;Ptenidium turgidum;Ptenidium turgidum;1;Ptenidium turgidum;1;  
KU919169;Coleoptera;Exocentrus adpersus;Exocentrus adpersus;1;Exocentrus adpersus;1;  
KU919207;Coleoptera;Denticollis linearis;Denticollis linearis;1;Denticollis linearis;1;  
KU919260;Coleoptera;Anisoxya fuscata;NA;NA;Anisoxya fuscata;1;  
KU919312;Coleoptera;Grammoptera ruficornis;Grammoptera ruficornis;1;Grammoptera ruficornis;1;



KU919342;Coleoptera;Anthaxia godeti;Anthaxia godeti;1;Anthaxia godeti;1;  
KU919362;Coleoptera;Pteryx suturalis;Pteryx suturalis;1;Pteryx suturalis;1;  
KU919407;Coleoptera;Tillus elongatus;NA;NA;Tillus elongatus;1;  
KU919416;Coleoptera;Denticollis linearis;Denticollis linearis;1;Denticollis linearis;1;  
KU919477;Coleoptera;Hymenalia rufipes;Hymenalia rufipes;NA;Hymenalia rufipes;1;  
KU919565;Coleoptera;Xyleborinus saxesenii;Xyleborinus saxesenii;1;Xyleborinus saxesenii;1;  
KU919574;Coleoptera;Anthaxia candens;Anthaxia candens;1;Anthaxia candens;1;  
KY683603;Coleoptera;Leptura aethiops;Leptura aethiops;1;Leptura aethiops;1;  
KY683608;Coleoptera;Gaurotus virginea kozhevnikovi;Gaurotus virginea;NA;Gaurotus virginea;1;  
KY683629;Coleoptera;Leptura aethiops;Leptura aethiops;1;Leptura aethiops;1;  
KY683651;Coleoptera;Gaurotus virginea kozhevnikovi;Gaurotus virginea;NA;Gaurotus virginea;1;  
KY683702;Coleoptera;Gaurotus virginea kozhevnikovi;Gaurotus virginea;NA;Gaurotus virginea;1;  
MF286233;Coleoptera;Agrilus viridis;Agrilus viridis;1;Agrilus viridis;0.999997752651974;  
MF286234;Coleoptera;Agrilus viridis;Agrilus viridis;1;Agrilus viridis;0.999996214958885;  
MF286235;Coleoptera;Agrilus viridis;Agrilus viridis;1;Agrilus viridis;0.998686873422301;  
MF286238;Coleoptera;Agrilus viridis;Agrilus viridis;1;Agrilus viridis;0.999999712126267;  
MF286256;Coleoptera;Agrilus viridis;Agrilus viridis;1;Agrilus viridis;0.99999718436355;  
MF286257;Coleoptera;Agrilus viridis;Agrilus viridis;1;Agrilus viridis;0.993900718357746;  
MF286258;Coleoptera;Agrilus viridis;Agrilus viridis;1;Agrilus viridis;0.999973062684815;  
MF286260;Coleoptera;Agrilus viridis;Agrilus viridis;1;Agrilus viridis;0.999996532948827;  
MF286261;Coleoptera;Agrilus viridis;Agrilus viridis;1;Agrilus viridis;0.999997125034565;  
MF286262;Coleoptera;Agrilus viridis;Agrilus viridis;1;Agrilus viridis;0.999997125034565;  
MF286320;Coleoptera;Agrilus viridis;Agrilus viridis;1;Agrilus viridis;0.999998254680252;  
MF286321;Coleoptera;Agrilus viridis;Agrilus viridis;1;Agrilus viridis;0.999991039621348;  
MF286326;Coleoptera;Agrilus viridis;Agrilus viridis;1;Agrilus viridis;0.999997622385463;  
MF373734;Coleoptera;Trypodendron domesticum;Trypodendron domesticum;1;Trypodendron domesticum;1;  
MF373742;Coleoptera;Trypodendron lineatum;Trypodendron lineatum;0.04;Trypodendron lineatum;1;  
MF543033;Coleoptera;Agrilus viridis;Agrilus viridis;1;Agrilus viridis;0.999999478467282;  
MF543034;Coleoptera;Agrilus viridis;Agrilus viridis;1;Agrilus viridis;0.999999152067365;  
MF543035;Coleoptera;Agrilus viridis;Agrilus viridis;1;Agrilus viridis;0.999999176740713;  
MF543036;Coleoptera;Agrilus viridis;Agrilus viridis;1;Agrilus viridis;0.999999503711488;  
MF543037;Coleoptera;Agrilus viridis;NA;NA;Agrilus graminis;1;  
MF611994;Coleoptera;Xyleborinus saxesenii;NA;0.318;Xyleborinus saxesenii;0.999999074788549;  
MF611995;Coleoptera;Xyleborinus saxesenii;Xyleborinus saxesenii;1;Xyleborinus saxesenii;1;  
MF611996;Coleoptera;Xyleborinus saxesenii;Xyleborinus saxesenii;0.006;Xyleborinus saxesenii;0.999977291933239;  
MF611997;Coleoptera;Xyleborinus saxesenii;Xyleborinus saxesenii;0.006;Xyleborinus saxesenii;0.999977291933239;  
MF611998;Coleoptera;Xyleborinus saxesenii;Xyleborinus saxesenii;0.006;Xyleborinus saxesenii;0.999977291933239;  
MF611999;Coleoptera;Xyleborus dryographus;Xyleborus dryographus;1;Xyleborus dryographus;1;  
MF612000;Coleoptera;Xyleborus dryographus;Xyleborus dryographus;1;Xyleborus dryographus;1;  
MF612001;Coleoptera;Xyleborus dryographus;Xyleborus dryographus;1;Xyleborus dryographus;1;  
MF612002;Coleoptera;Xyleborus dryographus;Xyleborus dryographus;1;Xyleborus dryographus;1;  
MF805176;Coleoptera;Agrilus viridis;Agrilus viridis;NA;Agrilus suvorovi;0.968856705633157;  
MH020302;Coleoptera;Bitoma crenata;Bitoma crenata;1;Bitoma crenata;1;  
MH020346;Coleoptera;Anoplodera sexguttata;Anoplodera sexguttata;1;Anoplodera sexguttata;1;  
MH020440;Coleoptera;Valgus hemipterus;Valgus hemipterus;1;Valgus hemipterus;1;  
MH020441;Coleoptera;Valgus hemipterus;Valgus hemipterus;1;Valgus hemipterus;1;  
MH115489;Coleoptera;Triplax russica;Triplax russica;1;Triplax russica;1;  
MH115490;Coleoptera;Triplax aenea;Triplax aenea;1;Triplax aenea;1;  
MH115492;Coleoptera;Tritoma bipustulata;NA;1;Tritoma bipustulata;1;  
MH115493;Coleoptera;Tritoma bipustulata;NA;1;Tritoma bipustulata;1;  
MH115547;Coleoptera;Plagionotus detritus;Plagionotus detritus;1;Plagionotus detritus;0.9999999874592;  
MH115561;Coleoptera;Anthaxia nitidula;Anthaxia nitidula;1;Anthaxia nitidula;1;  
MH115574;Coleoptera;Trypodendron lineatum;Trypodendron lineatum;1;Trypodendron lineatum;1;  
MK116398;Coleoptera;Prinobius myardi;Prinobius myardi;1;Prinobius myardi;0.99999997937951;  
MK116399;Coleoptera;Prinobius myardi;Prinobius myardi;1;Prinobius myardi;0.99999984780715;  
MK116400;Coleoptera;Prinobius myardi;Prinobius myardi;1;Prinobius myardi;0.999999960534667;  
MK116401;Coleoptera;Prinobius myardi;Prinobius myardi;0.999;Prinobius myardi;0.999999981711312;  
MK116402;Coleoptera;Prinobius myardi;Prinobius myardi;1;Prinobius myardi;0.99999997899468;  
MK116403;Coleoptera;Prinobius myardi;Prinobius myardi;1;Prinobius myardi;0.999999952710796;  
MK116404;Coleoptera;Prinobius myardi;Prinobius myardi;1;Prinobius myardi;0.999999976363768;  
MK153066;Coleoptera;Glischrochilus hortensis;Glischrochilus hortensis;1;Glischrochilus hortensis;1;  
MK643361;Coleoptera;Ips sexdentatus;Ips sexdentatus;1;Ips sexdentatus;1;  
MK643362;Coleoptera;Ips sexdentatus;NA;NA;Ips sexdentatus;1;  
MK643363;Coleoptera;Ips sexdentatus;Ips sexdentatus;NA;Ips sexdentatus;1;  
MK643364;Coleoptera;Ips sexdentatus;Ips sexdentatus;NA;Ips sexdentatus;1;  
MK643365;Coleoptera;Ips sexdentatus;Ips sexdentatus;NA;Ips sexdentatus;1;  
MK643366;Coleoptera;Ips sexdentatus;Ips sexdentatus;NA;Ips sexdentatus;1;  
MK643367;Coleoptera;Ips sexdentatus;NA;NA;Ips sexdentatus;1;  
MK643368;Coleoptera;Ips sexdentatus;NA;NA;Ips sexdentatus;1;  
MK643369;Coleoptera;Ips sexdentatus;NA;NA;Ips sexdentatus;1;  
MK643371;Coleoptera;Ips sexdentatus;Ips sexdentatus;1;Ips sexdentatus;1;  
MK892199;Coleoptera;Hylurgops palliatus;Hylurgops palliatus;1;Hylurgops palliatus;1;  
MK892217;Coleoptera;Platystomos albinus;NA;NA;Platystomos albinus;1;

MN182812;Coleoptera;Hesperophanes sericeus;Hesperophanes sericeus;1;Hesperophanes sericeus;1;  
MN182826;Coleoptera;Globicornis bifasciata;NA;NA;Globicornis bifasciata;1;  
MN182882;Coleoptera;Gnathoncus rotundatus;Gnathoncus buyssoni;NA;Gnathoncus buyssoni;1;  
MN182951;Coleoptera;Denops albofasciatus;Denops albofasciatus;1;Denops albofasciatus;1;  
MN182954;Coleoptera;Anthaxia confusa;Anthaxia confusa;1;Anthaxia confusa;1;  
MN182966;Coleoptera;Denops albofasciatus;Denops albofasciatus;1;Denops  
albofasciatus;0.999999999986272;  
MN182978;Coleoptera;Ipthiminius italicus;NA;NA;Ipthiminius italicus;1;  
MN182990;Coleoptera;Homophthalmus rugicollis;Dryophilus rugicollis;1;Dryophilus  
rugicollis;0.99999999999943;  
MN182996;Coleoptera;Denops albofasciatus;Denops albofasciatus;1;Denops albofasciatus;1;  
MT313186;Coleoptera;Ips sexdentatus;Ips sexdentatus;1;Ips sexdentatus;1;  
MT313187;Coleoptera;Ips sexdentatus;Ips sexdentatus;1;Ips sexdentatus;1;  
MT313188;Coleoptera;Ips sexdentatus;NA;NA;Ips sexdentatus;1;  
MT313189;Coleoptera;Ips sexdentatus;Ips sexdentatus;1;Ips sexdentatus;1;  
MT313190;Coleoptera;Ips sexdentatus;Ips sexdentatus;1;Ips sexdentatus;1;  
MT313191;Coleoptera;Ips sexdentatus;Ips sexdentatus;1;Ips sexdentatus;1;  
MT313192;Coleoptera;Ips sexdentatus;Ips sexdentatus;1;Ips sexdentatus;1;  
MT313193;Coleoptera;Ips sexdentatus;Ips sexdentatus;1;Ips sexdentatus;1;  
MT313194;Coleoptera;Ips sexdentatus;Ips sexdentatus;1;Ips sexdentatus;1;  
MT920089;Coleoptera;Ips sexdentatus;Ips sexdentatus;1;Ips sexdentatus;1;  
MT920090;Coleoptera;Ips sexdentatus;Ips sexdentatus;1;Ips sexdentatus;1;  
MT920091;Coleoptera;Ips sexdentatus;Ips sexdentatus;1;Ips sexdentatus;1;  
MT920092;Coleoptera;Ips sexdentatus;Ips sexdentatus;1;Ips sexdentatus;1;  
MT920093;Coleoptera;Ips sexdentatus;Ips sexdentatus;1;Ips sexdentatus;1;  
MT920094;Coleoptera;Ips sexdentatus;Ips sexdentatus;1;Ips sexdentatus;1;  
MT920095;Coleoptera;Ips sexdentatus;Ips sexdentatus;1;Ips sexdentatus;1;  
MT920096;Coleoptera;Ips sexdentatus;Ips sexdentatus;1;Ips sexdentatus;1;  
MT920097;Coleoptera;Ips sexdentatus;Ips sexdentatus;1;Ips sexdentatus;1;  
MT920098;Coleoptera;Ips sexdentatus;Ips sexdentatus;1;Ips sexdentatus;1;  
MT920099;Coleoptera;Ips sexdentatus;Ips sexdentatus;1;Ips sexdentatus;1;  
MT920100;Coleoptera;Ips sexdentatus;Ips sexdentatus;1;Ips sexdentatus;1;  
MT920101;Coleoptera;Ips sexdentatus;Ips sexdentatus;1;Ips sexdentatus;1;  
MT920102;Coleoptera;Ips sexdentatus;Ips sexdentatus;1;Ips sexdentatus;1;  
MT920103;Coleoptera;Ips sexdentatus;Ips sexdentatus;1;Ips sexdentatus;1;  
MT920104;Coleoptera;Ips sexdentatus;Ips sexdentatus;1;Ips sexdentatus;1;  
MT920105;Coleoptera;Ips sexdentatus;Ips sexdentatus;1;Ips sexdentatus;1;  
MT920106;Coleoptera;Ips sexdentatus;Ips sexdentatus;1;Ips sexdentatus;1;  
MT920107;Coleoptera;Ips sexdentatus;Ips sexdentatus;1;Ips sexdentatus;1;  
MT936905;Coleoptera;Ips sexdentatus;Ips sexdentatus;1;Ips sexdentatus;1;  
MT936906;Coleoptera;Ips sexdentatus;Ips sexdentatus;1;Ips sexdentatus;1;  
MT936907;Coleoptera;Ips sexdentatus;Ips sexdentatus;1;Ips sexdentatus;1;  
MT936908;Coleoptera;Ips sexdentatus;NA;NA;Ips sexdentatus;1;  
MT936909;Coleoptera;Ips sexdentatus;Ips sexdentatus;1;Ips sexdentatus;1;  
MT936910;Coleoptera;Ips sexdentatus;Ips sexdentatus;1;Ips sexdentatus;1;  
MT936911;Coleoptera;Ips sexdentatus;Ips sexdentatus;1;Ips sexdentatus;1;  
MT936912;Coleoptera;Ips sexdentatus;Ips sexdentatus;1;Ips sexdentatus;1;  
MT936913;Coleoptera;Ips sexdentatus;Ips sexdentatus;1;Ips sexdentatus;1;  
MT936917;Coleoptera;Ips sexdentatus;Ips sexdentatus;1;Ips sexdentatus;1;  
MT936918;Coleoptera;Ips sexdentatus;Ips sexdentatus;1;Ips sexdentatus;1;  
MT936919;Coleoptera;Ips sexdentatus;Ips sexdentatus;1;Ips sexdentatus;1;  
MT936920;Coleoptera;Ips sexdentatus;Ips sexdentatus;1;Ips sexdentatus;1;  
MT936921;Coleoptera;Ips sexdentatus;Ips sexdentatus;1;Ips sexdentatus;1;  
MT936922;Coleoptera;Ips sexdentatus;Ips sexdentatus;1;Ips sexdentatus;1;  
MT936923;Coleoptera;Ips sexdentatus;Ips sexdentatus;1;Ips sexdentatus;1;  
MT936924;Coleoptera;Ips sexdentatus;Ips sexdentatus;1;Ips sexdentatus;1;  
MT936925;Coleoptera;Ips sexdentatus;Ips sexdentatus;1;Ips sexdentatus;1;  
MT936926;Coleoptera;Ips sexdentatus;Ips sexdentatus;1;Ips sexdentatus;1;  
MT936927;Coleoptera;Ips sexdentatus;Ips sexdentatus;1;Ips sexdentatus;1;  
MT936928;Coleoptera;Ips sexdentatus;Ips sexdentatus;1;Ips sexdentatus;1;  
MW259333;Coleoptera;Leptusa fumida;Leptusa fumida;1;Leptusa fumida;1;  
MW259344;Coleoptera;Hypoganus inunctus;Hypoganus inunctus;1;Hypoganus inunctus;1;  
MW259357;Coleoptera;Phloeocharis subtilissima;Phloeocharis subtilissima;1;Phloeocharis  
subtilissima;1;  
MW259363;Coleoptera;Denticollis linearis;Denticollis linearis;1;Denticollis linearis;1;  
MW259380;Coleoptera;Phloeocharis subtilissima;Phloeocharis subtilissima;NA;Phloeocharis  
subtilissima;1;  
MW259394;Coleoptera;Denticollis linearis;Denticollis linearis;1;Denticollis linearis;1;  
MW259405;Coleoptera;Phloeocharis subtilissima;Phloeocharis subtilissima;NA;Phloeocharis  
subtilissima;1;  
MW259408;Coleoptera;Denticollis linearis;Denticollis linearis;1;Denticollis linearis;1;  
MW259423;Coleoptera;Denticollis linearis;Denticollis linearis;1;Denticollis linearis;1;  
MW259433;Coleoptera;Leptusa fumida;Leptusa fumida;1;Leptusa fumida;1;  
MW259437;Coleoptera;Phloeocharis subtilissima;Phloeocharis subtilissima;NA;Phloeocharis  
subtilissima;1;  
MW259451;Coleoptera;Epuraea variegata;Epuraea variegata;1;Epuraea variegata;0.999999999840242;  
MW259460;Coleoptera;Phloeocharis subtilissima;Phloeocharis subtilissima;NA;Phloeocharis  
subtilissima;1;

MW259468;Coleoptera;Epuraea variegata;Epuraea variegata;1;Epuraea variegata;0.99999999803379;  
MW259487;Coleoptera;Denticollis linearis;Denticollis linearis;1;Denticollis linearis;1;  
MW259505;Coleoptera;Denticollis linearis;Denticollis linearis;1;Denticollis linearis;1;  
MW259610;Coleoptera;Epuraea variegata;Epuraea variegata;1;Epuraea variegata;0.99999999840242;  
MW259616;Coleoptera;Hypoganus inunctus;Hypoganus inunctus;1;Hypoganus inunctus;1;  
MW259625;Coleoptera;Phloeocharis subtilissima;Phloeocharis subtilissima;NA;Phloeocharis  
subtilissima;1;  
MW259652;Coleoptera;Phloeocharis subtilissima;Phloeocharis subtilissima;NA;Phloeocharis  
subtilissima;1;  
MW259683;Coleoptera;Phloeocharis subtilissima;Phloeocharis subtilissima;NA;Phloeocharis  
subtilissima;1;  
MW259727;Coleoptera;Denticollis linearis;Denticollis linearis;1;Denticollis linearis;1;  
MW259734;Coleoptera;Leptusa fumida;Leptusa fumida;1;Leptusa fumida;0.99999999999915;  
MW259741;Coleoptera;Denticollis linearis;Denticollis linearis;1;Denticollis linearis;1;  
MW259742;Coleoptera;Denticollis linearis;Denticollis linearis;1;Denticollis linearis;1;  
MW259763;Coleoptera;Denticollis linearis;Denticollis linearis;1;Denticollis linearis;1;  
MW259823;Coleoptera;Tritoma bipustulata;NA;1;Tritoma bipustulata;1;  
MW259826;Coleoptera;Leptusa pulchella;Leptusa pulchella;1;Leptusa pulchella;1;  
MW259842;Coleoptera;Phloeocharis subtilissima;Phloeocharis subtilissima;NA;Phloeocharis  
subtilissima;1;  
MW259850;Coleoptera;Denticollis linearis;Denticollis linearis;1;Denticollis linearis;1;  
MW259863;Coleoptera;Leptusa pulchella;Leptusa pulchella;1;Leptusa pulchella;1;  
MW259868;Coleoptera;Leptusa fumida;Leptusa fumida;1;Leptusa fumida;0.99999999999886;  
MW259881;Coleoptera;Denticollis linearis;Denticollis linearis;1;Denticollis linearis;1;  
MW259892;Coleoptera;Phloeocharis subtilissima;Phloeocharis subtilissima;1;Phloeocharis  
subtilissima;1;  
MW259958;Coleoptera;Triphyllus bicolor;Triphyllus bicolor;1;Triphyllus bicolor;1;  
MZ606945;Coleoptera;Epuraea thoracica;Epuraea thoracica;1;Epuraea thoracica;0.99997650276254;  
MZ607099;Coleoptera;Uloma rufa;Uloma rufa;1;Uloma rufa;1;  
MZ607484;Coleoptera;Gonotropis dorsalis;NA;NA;Gonotropis dorsalis;1;  
MZ607976;Coleoptera;Atomaria vespertina;Atomaria vespertina;1;Atomaria vespertina;1;  
MZ608248;Coleoptera;Hylurgops palliatus;Hylurgops palliatus;1;Hylurgops palliatus;1;  
MZ608479;Coleoptera;Grynocharis oblonga;NA;1;Grynocharis oblonga;1;  
MZ608801;Coleoptera;Platycerus caraboides;Platycerus caraboides;1;Platycerus caraboides;1;  
MZ609239;Coleoptera;Epuraea thoracica;Epuraea thoracica;1;Epuraea thoracica;0.999982218697291;  
MZ609439;Coleoptera;Trypodendron domesticum;Trypodendron domesticum;1;Trypodendron domesticum;1;  
MZ609627;Coleoptera;Phloeocharis subtilissima;Phloeocharis subtilissima;1;Phloeocharis  
subtilissima;1;  
MZ609697;Coleoptera;Anisotoma castanea;Anisotoma castanea;1;Anisotoma  
castanea;0.999999999998835;  
MZ609906;Coleoptera;Zilora obscura;NA;NA;Zilora obscura;1;  
MZ610748;Coleoptera;Gonotropis dorsalis;NA;NA;Gonotropis dorsalis;1;  
MZ611151;Coleoptera;Grynocharis oblonga;Grynocharis oblonga;1;Grynocharis oblonga;1;  
MZ611361;Coleoptera;Tillus elongatus;Tillus elongatus;1;Tillus elongatus;0.999999999998181;  
MZ629289;Coleoptera;Euplectus mutator;Euplectus karstenii;0.997;Euplectus  
karstenii;0.999997742400088;  
MZ629346;Coleoptera;Uloma rufa;Uloma rufa;1;Uloma rufa;1;  
MZ629562;Coleoptera;Ptiliolum caledonicum;Ptiliolum caledonicum;1;Ptiliolum caledonicum;1;  
MZ629591;Coleoptera;Anisotoma orbicularis;Anisotoma orbicularis;1;Anisotoma orbicularis;1;  
MZ629980;Coleoptera;Phloeonomus pusillus;Phloeonomus pusillus;1;Phloeonomus pusillus;1;  
MZ630253;Coleoptera;Epuraea terminalis;Epuraea terminalis;1;Epuraea  
terminalis;0.999999449064925;  
MZ630316;Coleoptera;Euplectus mutator;Euplectus karstenii;0.984;Euplectus  
karstenii;0.999937468459556;  
MZ630440;Coleoptera;Zilora obscura;NA;NA;Zilora obscura;1;  
MZ630661;Coleoptera;Epuraea terminalis;Epuraea terminalis;1;Epuraea  
terminalis;0.999999449064925;  
MZ630758;Coleoptera;Xestobium rufovillosum;NA;1;Xestobium rufovillosum;1;  
MZ630778;Coleoptera;Epuraea unicolor;Epuraea unicolor;1;Epuraea unicolor;0.99999999999886;  
MZ630791;Coleoptera;Xestobium rufovillosum;NA;1;Xestobium rufovillosum;1;  
MZ630886;Coleoptera;Bibloporus minutus;Bibloporus minutus;1;Bibloporus minutus;1;  
MZ631017;Coleoptera;Bibloporus bicolor;Bibloporus bicolor;1;Bibloporus  
bicolor;0.99999999999829;  
MZ631132;Coleoptera;Xestobium rufovillosum;NA;1;Xestobium rufovillosum;1;  
MZ631514;Coleoptera;Pteryx suturalis;Pteryx suturalis;1;Pteryx suturalis;1;  
MZ631586;Coleoptera;Dendrophilus pygmaeus;Dendrophilus pygmaeus;1;Dendrophilus pygmaeus;1;  
MZ631637;Coleoptera;Euplectus punctatus;Euplectus punctatus;1;Euplectus  
punctatus;0.999999999998863;  
MZ631965;Coleoptera;Cis comptus;Cis comptus;1;Cis comptus;1;  
MZ632046;Coleoptera;Bibloporus bicolor;Bibloporus bicolor;1;Bibloporus  
bicolor;0.99999999999858;  
MZ632118;Coleoptera;Bibloporus minutus;Bibloporus minutus;1;Bibloporus minutus;1;  
MZ632137;Coleoptera;Dendrophagus crenatus;Dendrophagus crenatus;1;Dendrophagus  
crenatus;0.999999999982776;  
MZ632241;Coleoptera;Euplectus punctatus;Euplectus punctatus;1;Euplectus punctatus;1;  
MZ632268;Coleoptera;Anisotoma castanea;Anisotoma castanea;1;Anisotoma  
castanea;0.99999999999375;

MZ632391;Coleoptera;Bibloporus bicolor;Bibloporus bicolor;1;Bibloporus bicolor;0.99999999999858;  
 MZ632551;Coleoptera;Cis castaneus;Cis nitidus;1;Cis nitidus;0.999999999996618;  
 MZ632671;Coleoptera;Grynocharis oblonga;Grynocharis oblonga;1;Grynocharis oblonga;1;  
 MZ632855;Coleoptera;Bibloporus bicolor;Bibloporus bicolor;1;Bibloporus bicolor;0.99999999999488;  
 MZ633049;Coleoptera;Euplectus karstenii;Euplectus karstenii;1;Euplectus karstenii;1;  
 MZ633255;Coleoptera;Ernobius abietinus;Ernobius abietinus;1;Ernobius abietinus;1;  
 MZ633277;Coleoptera;Dendrophilus punctatus;NA;1;Dendrophilus punctatus;1;  
 MZ633333;Coleoptera;Euplectus punctatus;Euplectus punctatus;1;Euplectus punctatus;1;  
 MZ633606;Coleoptera;Euplectus punctatus;Euplectus punctatus;1;Euplectus punctatus;1;  
 MZ633702;Coleoptera;Phloeonomus pusillus;Phloeonomus pusillus;1;Phloeonomus pusillus;1;  
 MZ633713;Coleoptera;Tritoma bipustulata;NA;1;Tritoma bipustulata;1;  
 MZ633819;Coleoptera;Euplectus karstenii;Euplectus karstenii;1;Euplectus karstenii;1;  
 MZ633871;Coleoptera;Dendrophilus punctatus;NA;1;Dendrophilus punctatus;1;  
 MZ633982;Coleoptera;Bibloporus bicolor;Bibloporus bicolor;1;Bibloporus bicolor;0.99999999999801;  
 MZ634002;Coleoptera;Pteryx suturalis;NA;NA;Pteryx suturalis;1;  
 MZ634066;Coleoptera;Epuraea unicolor;Epuraea unicolor;1;Epuraea unicolor;0.99999999999972;  
 MZ634092;Coleoptera;Euplectus kirbii;NA;0.319;NA;0.99999999999995;  
 MZ656272;Coleoptera;Glischrochilus quadripunctatus;Glischrochilus tremulae;0.032;Glischrochilus tremulae;0.99797294682308;  
 MZ656569;Coleoptera;Latridius consimilis;Latridius consimilis;1;Latridius consimilis;1;  
 MZ656570;Coleoptera;Polygraphus poligraphus;Polygraphus poligraphus;1;Polygraphus poligraphus;0.999999999998977;  
 MZ656797;Coleoptera;Epuraea rufomarginata;Epuraea rufomarginata;1;Epuraea rufomarginata;1;  
 MZ656874;Coleoptera;Anisotoma glabra;Anisotoma glabra;1;Anisotoma glabra;1;  
 MZ657038;Coleoptera;Pteryx suturalis;NA;NA;Pteryx suturalis;1;  
 MZ657118;Coleoptera;Zilora obscura;Zilora obscura;1;Zilora obscura;1;  
 MZ657130;Coleoptera;Atrecus affinis;NA;NA;Atrecus affinis;1;  
 MZ657131;Coleoptera;Triplax aenea;Triplax aenea;1;Triplax aenea;1;  
 MZ657232;Coleoptera;Glischrochilus hortensis;Glischrochilus hortensis;1;Glischrochilus hortensis;1;  
 MZ657577;Coleoptera;Glischrochilus quadripunctatus;Glischrochilus quadripunctatus;0.989;Glischrochilus quadripunctatus;0.999999980836938;  
 MZ657597;Coleoptera;Atrecus pilicornis;Atrecus pilicornis;1;Atrecus pilicornis;1;  
 MZ657607;Coleoptera;Cis glabratus;Cis glabratus;1;Cis glabratus;1;  
 MZ657895;Coleoptera;Euryusa castanoptera;Euryusa castanoptera;1;Euryusa castanoptera;1;  
 MZ658069;Coleoptera;Atrecus pilicornis;Atrecus pilicornis;1;Atrecus pilicornis;1;  
 MZ658290;Coleoptera;Hylurgops palliatus;Hylurgops palliatus;1;Hylurgops palliatus;1;  
 MZ658387;Coleoptera;Xestobium rufovillosum;NA;1;Xestobium rufovillosum;1;  
 MZ658394;Coleoptera;Epuraea rufomarginata;Epuraea rufomarginata;1;Epuraea rufomarginata;1;  
 MZ658876;Coleoptera;Anisotoma axillaris;Anisotoma axillaris;1;Anisotoma axillaris;0.9999999999963052;  
 MZ659113;Coleoptera;Epuraea thoracica;Epuraea thoracica;0.005;Epuraea thoracica;0.999962246641901;  
 MZ659194;Coleoptera;Anisotoma humeralis;Anisotoma humeralis;1;Anisotoma humeralis;0.9999999999922693;  
 MZ659575;Coleoptera;Euplectus karstenii;Euplectus karstenii;1;Euplectus karstenii;0.999999999999972;  
 MZ659612;Coleoptera;Anisotoma castanea;Anisotoma castanea;1;Anisotoma castanea;0.99999999999892;  
 MZ659725;Coleoptera;Atrecus pilicornis;Atrecus pilicornis;1;Atrecus pilicornis;1;  
 MZ659768;Coleoptera;Anisotoma humeralis;Anisotoma humeralis;1;Anisotoma humeralis;0.9999999999966832;  
 MZ659828;Coleoptera;Triplax aenea;Triplax aenea;NA;Triplax aenea;1;  
 MZ659945;Coleoptera;Platycerus caprea;Platycerus caprea;1;Platycerus caprea;1;  
 MZ660069;Coleoptera;Dendrophagus crenatus;Dendrophagus crenatus;1;Dendrophagus crenatus;0.999999999998693;  
 MZ660264;Coleoptera;Elateroides dermestoides;Elateroides dermestoides;1;Elateroides dermestoides;1;  
 MZ660274;Coleoptera;Uloma rufa;Uloma rufa;1;Uloma rufa;1;  
 MZ660362;Coleoptera;Grynocharis oblonga;Grynocharis oblonga;1;Grynocharis oblonga;1;  
 MZ660402;Coleoptera;Anisotoma axillaris;Anisotoma axillaris;1;Anisotoma axillaris;0.9999999999931191;  
 MZ660746;Coleoptera;Placusa atrata;Placusa atrata;1;Placusa atrata;0.999999999999972;  
 MZ660885;Coleoptera;Euryusa castanoptera;Euryusa castanoptera;1;Euryusa castanoptera;1;  
 MZ660951;Coleoptera;Epuraea rufomarginata;Epuraea rufomarginata;1;Epuraea rufomarginata;1;  
 MZ660969;Coleoptera;Gonotropis dorsalis;Gonotropis dorsalis;1;Gonotropis dorsalis;1;  
 MZ661011;Coleoptera;Epuraea rufomarginata;Epuraea rufomarginata;1;Epuraea rufomarginata;1;  
 NC\_036274;Coleoptera;Vincenzellus ruficollis;NA;NA;NA;0.99999999999916;  
 NC\_036281;Coleoptera;Ips sexdentatus;Ips sexdentatus;1;NA;0.999999999999967;  
 NC\_036286;Coleoptera;Trypodendron domesticum;Trypodendron domesticum;1;Trypodendron domesticum;0.999917621850669;  
 NC\_036290;Coleoptera;Hylastes attenuatus;Hylastes attenuatus;1;Hylastes attenuatus;0.999803724873253;  
 NC\_036293;Coleoptera;Anisandrus dispar;Anisandrus dispar;1;Anisandrus dispar;0.857065340434243;  
 NC\_036294;Coleoptera;Gnathotrichus materiarius;Gnathotrichus materiarius;1;Gnathotrichus materiarius;0.999999650013994;

NOBAR005-10;Coleoptera;Trypodendron lineatum;Trypodendron lineatum;0.003;Trypodendron lineatum;1;  
NOCLP1686-19;Coleoptera;Denticollis linearis;Denticollis linearis;1;Denticollis linearis;1;  
NOCLP1687-19;Coleoptera;Denticollis linearis;Denticollis linearis;1;Denticollis linearis;1;  
NOCLP1693-19;Coleoptera;Trixagus atticus;Trixagus atticus;1;Trixagus atticus;1;  
NOCLP1694-19;Coleoptera;Trixagus atticus;Trixagus atticus;1;Trixagus atticus;1;  
NOCLP1703-19;Coleoptera;Trixagus carinifrons;Trixagus carinifrons;1;Trixagus carinifrons;1;  
NOCLP1735-19;Coleoptera;Hylastes angustatus;Hylastes angustatus;1;Hylastes angustatus;1;  
NOCLP1770-19;Coleoptera;Ips sexdentatus;Ips sexdentatus;1;Ips sexdentatus;1;  
NOCLP1775-19;Coleoptera;Xyleborinus saxesenii;Xyleborinus saxesenii;1;Xyleborinus saxesenii;1;  
NOCLP1783-19;Coleoptera;Trypodendron lineatum;Trypodendron lineatum;0.013;Trypodendron lineatum;1;  
NOCLP1788-19;Coleoptera;Xyleborus cryptographus;Xyleborus cryptographus;1;Xyleborus cryptographus;1;  
NOCLP1789-19;Coleoptera;Xyleborus cryptographus;Xyleborus cryptographus;1;Xyleborus cryptographus;1;  
NOCLP1791-19;Coleoptera;Anisandrus dispar;Anisandrus dispar;1;Anisandrus dispar;1;  
NOCLP1793-19;Coleoptera;Anisandrus dispar;Anisandrus dispar;1;Anisandrus dispar;1;  
NOCOL015-12;Coleoptera;Denticollis linearis;Denticollis linearis;1;Denticollis linearis;1;  
NOCOL016-12;Coleoptera;Denticollis linearis;Denticollis linearis;1;Denticollis linearis;1;  
NOCOL018-12;Coleoptera;Denticollis linearis;Denticollis linearis;1;Denticollis linearis;1;  
OK139664;Coleoptera;Xestobium rufovillosum;NA;1;Xestobium rufovillosum;1;  
OK142732;Coleoptera;Xestobium rufovillosum;Xestobium rufovillosum;1;Xestobium rufovillosum;1;  
OK142733;Coleoptera;Xestobium rufovillosum;Xestobium rufovillosum;1;Xestobium rufovillosum;1;  
OK142771;Coleoptera;Xestobium rufovillosum;NA;1;Xestobium rufovillosum;1;  
OK144134;Coleoptera;Xestobium rufovillosum;NA;1;Xestobium rufovillosum;1;  
OK144142;Coleoptera;Xestobium rufovillosum;Xestobium rufovillosum;1;Xestobium rufovillosum;1;  
POLYT005-19;Coleoptera;Glischrochilus quadripunctatus;NA;0.012;Glischrochilus tremulae;0.967840601585585;  
SCOL018-12;Coleoptera;Trypodendron lineatum;Trypodendron lineatum;0.034;Trypodendron lineatum;0.999999160498288;  
SCOL029-12;Coleoptera;Trypodendron domesticum;Trypodendron domesticum;1;Trypodendron domesticum;0.999999999966434;  
SCOL039-12;Coleoptera;Trypodendron domesticum;Trypodendron domesticum;1;Trypodendron domesticum;0.999999999996277;  
SCOL045-12;Coleoptera;Polygraphus poligraphus;Polygraphus poligraphus;1;Polygraphus poligraphus;1;  
SCOL049-12;Coleoptera;Trypodendron lineatum;Trypodendron lineatum;0.028;Trypodendron lineatum;0.999999944681322;  
SCOL050-12;Coleoptera;Hylastes attenuatus;Hylastes attenuatus;1;Hylastes attenuatus;0.999999999963421;  
SCOL061-12;Coleoptera;Trypodendron lineatum;Trypodendron lineatum;0.003;Trypodendron lineatum;0.999999788061694;  
SCOL065-12;Coleoptera;Ips sexdentatus;Ips sexdentatus;NA;Ips sexdentatus;0.999999992695166;  
SCOL110-12;Coleoptera;Trypodendron lineatum;Trypodendron lineatum;0.002;Trypodendron lineatum;0.999999913940716;  
SCOL153-12;Coleoptera;Trypodendron lineatum;Trypodendron lineatum;0.002;Trypodendron lineatum;0.999999913940716;  
SCOL158-12;Coleoptera;Trypodendron lineatum;Trypodendron lineatum;0.002;Trypodendron lineatum;0.999999913940716;  
SCOL162-12;Coleoptera;Trypodendron lineatum;Trypodendron lineatum;0.003;Trypodendron lineatum;0.999999999999972;  
SCOL171-12;Coleoptera;Hylurgops palliatus;Hylurgops palliatus;1;Hylurgops palliatus;0.999999997941359;  
SCOL172-12;Coleoptera;Trypodendron lineatum;Trypodendron lineatum;0.025;Trypodendron lineatum;0.999998012066059;  
SCOL174-12;Coleoptera;Ips typographus;NA;0.022;Ips typographus;0.99999998631893;  
SCOL178-12;Coleoptera;Trypodendron lineatum;Trypodendron lineatum;NA;Trypodendron lineatum;0.99999892616052;  
SCOL193-12;Coleoptera;Trypodendron lineatum;Trypodendron lineatum;0.002;Trypodendron lineatum;0.999999913940716;  
SCOL203-12;Coleoptera;Trypodendron lineatum;Trypodendron lineatum;0.024;Trypodendron lineatum;0.999999941982908;  
SCOL219-12;Coleoptera;Xyleborinus saxesenii;Xyleborinus saxesenii;1;Xyleborinus saxesenii;0.999999948542326;  
SCOL271-12;Coleoptera;Ips typographus;NA;0.043;Ips typographus;0.999923923145452;  
SCOL277-12;Coleoptera;Trypodendron lineatum;Trypodendron lineatum;0.024;Trypodendron lineatum;0.999999376350696;  
SCOL301-12;Coleoptera;Trypodendron domesticum;Trypodendron domesticum;1;Trypodendron domesticum;0.99999999992838;  
SCOL313-12;Coleoptera;Ips typographus;NA;NA;Ips typographus;0.999976345733228;  
SCOL324-12;Coleoptera;Trypodendron lineatum;Trypodendron lineatum;0.027;Trypodendron lineatum;0.999999740451448;  
SICOC487-18;Coleoptera;Ergates faber;Trichocnemis spiculatus;1;Trichocnemis spiculatus;0.999999999999957;  
TDAAT012-19;Coleoptera;Tillus elongatus;NA;NA;Tillus elongatus;1;  
TDAAT1086-20;Coleoptera;Plagionotus arcuatus;Plagionotus arcuatus;1;Plagionotus arcuatus;0.999999982287932;

TDAAT1088-20;Coleoptera;Valgus hemipterus;Valgus hemipterus;1;Valgus hemipterus;1;  
TDAAT1101-20;Coleoptera;Leiopus nebulosus;NA;0.042;Leiopus linnei;0.921884459848507;  
TDAAT1116-20;Coleoptera;Ptilinus pectinicornis;Ptilinus pectinicornis;1;Ptilinus  
pectinicornis;1;  
TDAAT1118-20;Coleoptera;Xylotrechus antilope;Xylotrechus antilope;1;Xylotrechus antilope;1;  
TDAAT1120-20;Coleoptera;Exocentrus adpersus;Exocentrus adpersus;1;Exocentrus adpersus;1;  
TDAAT1121-20;Coleoptera;Axinopalpis gracilis;NA;NA;Axinopalpis gracilis;1;  
TDAAT1223-20;Coleoptera;Platystomos albinus;NA;NA;Platystomos albinus;1;  
TDAAT1244-20;Coleoptera;Grammoptera ruficornis;Grammoptera ruficornis;1;Grammoptera  
ruficornis;1;  
TDAAT1526-20;Coleoptera;Grammoptera ruficornis;NA;NA;Grammoptera ruficornis;0.999999999999289;  
TDAAT1534-20;Coleoptera;Exocentrus adpersus;Exocentrus adpersus;1;Exocentrus adpersus;1;  
TDAAT1564-20;Coleoptera;Anthaxia helvetica;Anthaxia helvetica;1;Anthaxia helvetica;1;  
TDAAT1565-20;Coleoptera;Anthaxia quadripunctata;Anthaxia quadripunctata;1;Anthaxia  
quadripunctata;1;  
TDAAT1567-20;Coleoptera;Anthaxia morio;Anthaxia morio;1;Anthaxia morio;1;  
TDAAT1614-20;Coleoptera;Bitoma crenata;Bitoma crenata;1;Bitoma crenata;1;  
TDAAT1738-20;Coleoptera;Anthaxia helvetica;Anthaxia helvetica;1;Anthaxia helvetica;1;  
TDAAT1744-20;Coleoptera;Anthaxia quadripunctata;Anthaxia quadripunctata;1;Anthaxia  
quadripunctata;1;  
TDAAT1921-20;Coleoptera;Gnorimus nobilis;Gnorimus nobilis;1;Gnorimus nobilis;1;  
TDAAT1927-20;Coleoptera;Tillus elongatus;Tillus elongatus;1;Tillus elongatus;0.99999999999784;  
TDAAT950-20;Coleoptera;Valgus hemipterus;Valgus hemipterus;NA;Valgus hemipterus;1;  
TDAAT981-20;Coleoptera;Anthaxia podolica;Anthaxia podolica;1;Anthaxia podolica;1;  
TDAAT982-20;Coleoptera;Agrilus viridis;Agrilus viridis;1;Agrilus viridis;0.99999877940049;  
TDAAT983-20;Coleoptera;Ptilinus pectinicornis;Ptilinus pectinicornis;1;Ptilinus pectinicornis;1;  
TDAOE185-21;Coleoptera;Grammoptera ruficornis;Grammoptera ruficornis;1;Grammoptera  
ruficornis;0.999999999999545;  
TDAOE214-21;Coleoptera;Uloma rufa;Uloma rufa;1;Uloma rufa;1;  
TDAOE356-21;Coleoptera;Valgus hemipterus;Valgus hemipterus;1;Valgus hemipterus;1;  
ULMCA001-19;Coleoptera;Glischrochilus quadriguttatus;Glischrochilus  
quadriguttatus;1;Glischrochilus quadriguttatus;1;  
ULMCA009-19;Coleoptera;Epuraea unicolor;Epuraea unicolor;1;Epuraea unicolor;0.999999999999943;  
ULMCA012-19;Coleoptera;Glischrochilus quadriguttatus;Glischrochilus  
quadriguttatus;1;Glischrochilus quadriguttatus;1;  
ZMBN134-16;Coleoptera;Leptusa pulchella;Leptusa pulchella;1;Leptusa pulchella;1;  
ZMBN761-17;Coleoptera;Anthaxia quadripunctata;Anthaxia quadripunctata;1;Anthaxia  
quadripunctata;0.99999998992223;  
ABEE003-17;Hymenoptera;Andrena hattorfiana;Andrena hattorfiana;1;Andrena hattorfiana;1;  
ABEE026-17;Hymenoptera;Halictus quadricinctus;Halictus quadricinctus;1;Halictus quadricinctus;1;  
ABEE080-17;Hymenoptera;Sphecodes cristatus;Sphecodes cristatus;1;Sphecodes  
cristatus;0.999999999999204;  
ABEE103-17;Hymenoptera;Andrena hattorfiana;Andrena hattorfiana;1;Andrena hattorfiana;1;  
ABEE104-17;Hymenoptera;Halictus quadricinctus;Halictus quadricinctus;1;Halictus  
quadricinctus;0.999999999999716;  
ABEE140-17;Hymenoptera;Andrena ovatula;Andrena ovatula;1;Andrena ovatula;0.999999996163041;  
ABEE162-17;Hymenoptera;Andrena hattorfiana;Andrena hattorfiana;1;Andrena hattorfiana;1;  
ABEE225-17;Hymenoptera;Lasioglossum clypeare;Lasioglossum clypeare;1;Lasioglossum  
clypeare;0.9999999976194;  
ACUF1035-12;Hymenoptera;Andrena argentata;Andrena barbilabris;1;Andrena  
barbilabris;0.999999038526206;  
AF104653;Hymenoptera;Lasioglossum majus;Lasioglossum majus;1;Lasioglossum  
majus;0.999307085647598;  
BBBO067-10;Hymenoptera;Bombus alpinus;Bombus alpinus;1;Bombus alpinus;0.999999963317294;  
BEEEE116-15;Hymenoptera;Bombus monticola;Bombus monticola;1;Bombus monticola;0.999720698703334;  
BEEEE130-15;Hymenoptera;Lasioglossum laevigatum;Lasioglossum laevigatum;1;Lasioglossum  
laevigatum;0.999999999999972;  
BEEEE139-15;Hymenoptera;Colletes succinctus;NA;NA;NA;0.999999999998211;  
BEEEE144-15;Hymenoptera;Andrena ovatula;Andrena ovatula;1;Andrena ovatula;0.999999698955139;  
BEEEE183-15;Hymenoptera;Lasioglossum laevigatum;Lasioglossum laevigatum;1;Lasioglossum  
laevigatum;1;  
BEEEE208-15;Hymenoptera;Andrena hattorfiana;Andrena hattorfiana;1;Andrena hattorfiana;1;  
BEEEE212-15;Hymenoptera;Lasioglossum xanthopus;Lasioglossum xanthopus;1;Lasioglossum  
xanthopus;0.9999999999984652;  
BEEEE216-15;Hymenoptera;Colletes fodiens;Colletes fodiens;1;Colletes fodiens;0.996980773551553;  
BEEEE235-15;Hymenoptera;Colletes succinctus;NA;NA;NA;0.999999999997973;  
BEEEE237-15;Hymenoptera;Andrena ovatula;Andrena ovatula;1;Andrena ovatula;0.999999937493444;  
BEEEE242-15;Hymenoptera;Sphecodes hyalinatus;Sphecodes hyalinatus;0.003;Sphecodes  
hyalinatus;0.999557194637488;  
BEEEE245-15;Hymenoptera;Melitta tricineta;Melitta tricineta;NA;Melitta  
tricineta;0.999999999999858;  
BEEEE252-15;Hymenoptera;Epeolus cruciger;NA;0.048;Epeolus cruciger;0.975988992906172;  
BEEEE311-16;Hymenoptera;Bombus monticola;Bombus monticola;1;Bombus monticola;0.998981344571331;  
BEEEE312-16;Hymenoptera;Bombus monticola;Bombus monticola;1;Bombus monticola;0.998981344571331;  
BEEEE335-16;Hymenoptera;Bombus monticola;Bombus monticola;1;Bombus monticola;0.998981344571331;  
BOMNI066-13;Hymenoptera;Bombus alpinus;Bombus alpinus;1;Bombus alpinus;0.99999996600849;  
BOWGF169-08;Hymenoptera;Sphecodes rubicundus;Sphecodes rubicundus;1;Sphecodes  
rubicundus;0.999999974458234;

EF028492;Hymenoptera;Colletes albomaculatus;Colletes nasutus;1;Colletes nasutus;0.998441153984403;  
 EF028495;Hymenoptera;Colletes collaris;Colletes collaris;1;Colletes collaris;0.99995031961704;  
 EF028504;Hymenoptera;Colletes fodiens;Colletes fodiens;1;Colletes fodiens;0.996966267414801;  
 EF028508;Hymenoptera;Colletes graeffei;Colletes graeffei;1;Colletes graeffei;0.999999624648253;  
 EF028525;Hymenoptera;Colletes succinctus;NA;NA;NA;0.999999999996005;  
 EF028527;Hymenoptera;Colletes wolffi;Colletes wolffi;1;Colletes wolffi;0.999999953084427;  
 EF218722;Hymenoptera;Colletes graeffei;Colletes graeffei;1;Colletes graeffei;0.999999624648253;  
 GMBUD1100-14;Hymenoptera;Lasioglossum angusticeps;Lasioglossum angusticeps;1;Lasioglossum angusticeps;0.999999999988546;  
 GMBUD183-14;Hymenoptera;Andrena ovatula;Andrena ovatula;1;Andrena ovatula;0.999999999478717;  
 GMBUE1926-14;Hymenoptera;Lasioglossum pygmaeum;Lasioglossum pygmaeum;1;Lasioglossum pygmaeum;0.999999998804384;  
 GMBUE2034-14;Hymenoptera;Lasioglossum angusticeps;Lasioglossum angusticeps;1;Lasioglossum angusticeps;0.999999999985903;  
 GMBUE2049-14;Hymenoptera;Lasioglossum angusticeps;Lasioglossum angusticeps;1;Lasioglossum angusticeps;0.99999999941565;  
 GMBUG400-14;Hymenoptera;Lasioglossum angusticeps;Lasioglossum angusticeps;1;Lasioglossum angusticeps;0.99999999971749;  
 GMGMA1092-14;Hymenoptera;Lasioglossum minutulum;Lasioglossum minutulum;1;Lasioglossum minutulum;1;  
 GMGMD182-14;Hymenoptera;Lasioglossum costulatum;Lasioglossum costulatum;1;Lasioglossum costulatum;1;  
 GMGMN298-14;Hymenoptera;Andrena hattorfiana;Andrena hattorfiana;1;Andrena hattorfiana;1;  
 GMRSK019-15;Hymenoptera;Colletes collaris;Colletes collaris;NA;Colletes collaris;0.999804101688157;  
 GMRSU159-15;Hymenoptera;Sphecodes hyalinatus;NA;0.069;Sphecodes hyalinatus;0.991349472308359;  
 GMRUB009-16;Hymenoptera;Colletes collaris;Colletes collaris;0.982;Colletes collaris;0.99996441429844;  
 GMRUB010-16;Hymenoptera;Colletes collaris;Colletes collaris;0.999;Colletes collaris;0.999943628042431;  
 GMRUB011-16;Hymenoptera;Colletes collaris;Colletes collaris;1;Colletes collaris;0.999926724150448;  
 GU705902;Hymenoptera;Bombus gerstaeckeri;Bombus gerstaeckeri;1;Bombus gerstaeckeri;0.999999996373589;  
 GU705913;Hymenoptera;Bombus monticola;Bombus monticola;1;Bombus monticola;0.99982316997635;  
 GU705914;Hymenoptera;Bombus mendax;Bombus mendax;1;Bombus mendax;0.9999999999406;  
 GU706050;Hymenoptera;Melitta tricincta;Melitta tricincta;NA;Melitta tricincta;1;  
 HM376238;Hymenoptera;Andrena hattorfiana;Andrena hattorfiana;1;Andrena hattorfiana;1;  
 HM401035;Hymenoptera;Sphecodes schenckii;Sphecodes schenckii;1;Sphecodes schenckii;0.999999904504169;  
 HM401038;Hymenoptera;Nomada armata;Nomada armata;1;Nomada armata;0.999999999724196;  
 HM401047;Hymenoptera;Andrena fulvida;Andrena fulvida;1;Andrena fulvida;0.99999999996146;  
 HM401093;Hymenoptera;Halictus quadricinctus;Halictus quadricinctus;1;Halictus quadricinctus;1;  
 HM401098;Hymenoptera;Lasioglossum angusticeps;Lasioglossum angusticeps;1;Lasioglossum angusticeps;0.999999999984624;  
 HM401100;Hymenoptera;Lasioglossum costulatum;Lasioglossum costulatum;1;Lasioglossum costulatum;0.999999999999915;  
 HM401151;Hymenoptera;Dufourea dentiventris;Dufourea dentiventris;1;Dufourea dentiventris;1;  
 HM401156;Hymenoptera;Colletes fodiens;Colletes fodiens;1;Colletes fodiens;0.997405602727073;  
 HM401180;Hymenoptera;Hylaeus pfankuchi;Hylaeus pfankuchi;1;Hylaeus pfankuchi;0.999722272576945;  
 HM401181;Hymenoptera;Hylaeus pfankuchi;Hylaeus pfankuchi;1;Hylaeus pfankuchi;0.999722272576945;  
 HM401182;Hymenoptera;Hylaeus pfankuchi;Hylaeus pfankuchi;NA;Hylaeus pfankuchi;0.999456633066967;  
 HM401183;Hymenoptera;Hylaeus pfankuchi;Hylaeus pfankuchi;1;Hylaeus pfankuchi;0.999238980743741;  
 HM401257;Hymenoptera;Lasioglossum pygmaeum;Lasioglossum pygmaeum;1;Lasioglossum pygmaeum;0.999999999938325;  
 HM401267;Hymenoptera;Bombus gerstaeckeri;Bombus gerstaeckeri;1;Bombus gerstaeckeri;0.999999996373589;  
 HM401268;Hymenoptera;Bombus gerstaeckeri;Bombus gerstaeckeri;1;Bombus gerstaeckeri;0.999999996373589;  
 HQ563095;Hymenoptera;Sphecodes rubicundus;Sphecodes rubicundus;1;Sphecodes rubicundus;0.999999981305081;  
 HQ563096;Hymenoptera;Sphecodes rubicundus;Sphecodes rubicundus;1;Sphecodes rubicundus;0.999999973263556;  
 HQ563099;Hymenoptera;Sphecodes schenckii;Sphecodes schenckii;1;Sphecodes schenckii;0.999999994175511;  
 HQ563101;Hymenoptera;Nomada argentata;Nomada argentata;1;Nomada argentata;0.999999917757382;  
 HQ563801;Hymenoptera;Bombus mendax;Bombus mendax;1;Bombus mendax;0.99999999995282;  
 HQ563802;Hymenoptera;Bombus mendax;Bombus mendax;1;Bombus mendax;0.9999999999406;  
 HQ948038;Hymenoptera;Nomada roberjeotiana;Nomada tormentillae;NA;Nomada tormentillae;0.990757204907176;  
 HQ948039;Hymenoptera;Nomada roberjeotiana;Nomada tormentillae;NA;Nomada tormentillae;0.996173290371019;  
 HQ948040;Hymenoptera;Nomada mutica;Nomada mutica;1;Nomada mutica;0.99999918674023;  
 HQ948051;Hymenoptera;Lasioglossum angusticeps;Lasioglossum angusticeps;1;Lasioglossum angusticeps;0.999999999996845;  
 HQ948052;Hymenoptera;Lasioglossum brevicorne;NA;0.323;Lasioglossum brevicorne;0.999999995313345;

HQ948053;Hymenoptera;Lasioglossum brevicorne;Lasioglossum brevicorne;1;Lasioglossum brevicorne;0.99999999104915;  
 HQ948059;Hymenoptera;Epeolus cruciger;Epeolus cruciger;1;Epeolus cruciger;0.999989764568256;  
 HQ948069;Hymenoptera;Melitta tricineta;Melitta tricineta;NA;Melitta tricineta;0.99999999999829;  
 HQ948113;Hymenoptera;Lasioglossum quadrinotatum;Lasioglossum quadrinotatum;1;Lasioglossum quadrinotatum;0.99999999999886;  
 HQ948115;Hymenoptera;Colletes floralis;Colletes floralis;1;Colletes floralis;0.999999985844284;  
 HQ948116;Hymenoptera;Colletes floralis;Colletes floralis;1;Colletes floralis;0.999999971142075;  
 HQ948117;Hymenoptera;Colletes floralis;Colletes floralis;1;Colletes floralis;0.99999998327894;  
 HQ948121;Hymenoptera;Bombus alpinus;Bombus alpinus;1;Bombus alpinus;0.999999926677336;  
 HQ954752;Hymenoptera;Lasioglossum laevigatum;Lasioglossum laevigatum;1;Lasioglossum laevigatum;1;  
 HQ954754;Hymenoptera;Lasioglossum majus;Lasioglossum majus;1;Lasioglossum majus;0.999321175089311;  
 HQ954759;Hymenoptera;Lasioglossum quadrinotatum;Lasioglossum quadrinotatum;1;Lasioglossum quadrinotatum;0.99999999998721;  
 HQ954760;Hymenoptera;Lasioglossum quadrinotatum;Lasioglossum quadrinotatum;1;Lasioglossum quadrinotatum;0.99999999999176;  
 HQ954766;Hymenoptera;Andrena fulvida;Andrena fulvida;1;Andrena fulvida;0.999999999935;  
 HYMAA253-21;Hymenoptera;Andrena ovatula;Andrena ovatula;1;Andrena ovatula;0.999993325987407;  
 HYMAA254-21;Hymenoptera;Andrena ovatula;Andrena ovatula;1;Andrena ovatula;0.99999780094096;  
 JQ909690;Hymenoptera;Andrena ovatula;Andrena ovatula;1;Andrena ovatula;0.999999869136852;  
 JQ909712;Hymenoptera;Colletes floralis;Colletes floralis;1;Colletes floralis;0.99999996590304;  
 JQ909713;Hymenoptera;Colletes floralis;Colletes floralis;1;Colletes floralis;0.99999996590304;  
 JQ909714;Hymenoptera;Colletes floralis;Colletes floralis;1;Colletes floralis;0.99999996590304;  
 JQ909715;Hymenoptera;Colletes floralis;Colletes floralis;1;Colletes floralis;0.99999996590304;  
 JQ909721;Hymenoptera;Colletes succinctus;NA;NA;NA;0.999999999949464;  
 JQ909722;Hymenoptera;Colletes succinctus;NA;NA;NA;0.99999999999541;  
 JQ909723;Hymenoptera;Colletes succinctus;NA;NA;NA;0.99999999999886;  
 JQ909724;Hymenoptera;Colletes succinctus;NA;NA;NA;0.999999999949464;  
 JQ909874;Hymenoptera;Sphecodes hyalinatus;Sphecodes hyalinatus;0.013;Sphecodes hyalinatus;0.989257894811799;  
 JQ909875;Hymenoptera;Sphecodes hyalinatus;NA;0.024;Sphecodes hyalinatus;0.963725437528646;  
 JQ909876;Hymenoptera;Sphecodes hyalinatus;Sphecodes hyalinatus;0.013;Sphecodes hyalinatus;0.989257894811799;  
 JQ909877;Hymenoptera;Sphecodes hyalinatus;Sphecodes hyalinatus;0.013;Sphecodes hyalinatus;0.989257894811799;  
 JQ909878;Hymenoptera;Sphecodes hyalinatus;Sphecodes hyalinatus;0.013;Sphecodes hyalinatus;0.989257894811799;  
 JX256660;Hymenoptera;Sphecodes schenckii;Sphecodes schenckii;0.002;Sphecodes schenckii;0.999366092568888;  
 JX256667;Hymenoptera;Sphecodes cristatus;Sphecodes cristatus;1;Sphecodes cristatus;0.999998851670659;  
 JX256703;Hymenoptera;Sphecodes majalis;Sphecodes majalis;1;Sphecodes majalis;0.99999792053916;  
 JX256721;Hymenoptera;Sphecodes spinulosus;Sphecodes spinulosus;1;Sphecodes spinulosus;0.999999814916424;  
 JX256722;Hymenoptera;Sphecodes spinulosus;Sphecodes spinulosus;1;Sphecodes spinulosus;0.999993801749408;  
 JX256725;Hymenoptera;Sphecodes rubicundus;Sphecodes rubicundus;1;Sphecodes rubicundus;0.999996646819278;  
 KF434334;Hymenoptera;Bombus monticola;Bombus monticola;1;Bombus monticola;0.99978633943506;  
 KF434335;Hymenoptera;Bombus monticola;Bombus monticola;1;Bombus monticola;0.99992968678245;  
 KF434336;Hymenoptera;Bombus monticola;Bombus monticola;1;Bombus monticola;0.99992968678245;  
 KF434337;Hymenoptera;Bombus monticola;Bombus monticola;1;Bombus monticola;0.99992968678245;  
 KF434338;Hymenoptera;Bombus monticola;Bombus monticola;1;Bombus monticola;0.99978633943506;  
 KF434339;Hymenoptera;Bombus monticola;Bombus monticola;1;Bombus monticola;0.99992968678245;  
 KF434340;Hymenoptera;Bombus monticola;Bombus monticola;1;Bombus monticola;0.99992968678245;  
 KF434341;Hymenoptera;Bombus monticola;Bombus monticola;1;Bombus monticola;0.99978633943506;  
 KJ836415;Hymenoptera;Sphecodes croaticus;Sphecodes croaticus;1;Sphecodes croaticus;0.999998146129527;  
 KJ836433;Hymenoptera;Sphecodes croaticus;Sphecodes croaticus;1;Sphecodes croaticus;0.999638472217986;  
 KJ836467;Hymenoptera;Nomada villosa;NA;NA;Nomada striata;0.894506833279756;  
 KJ836474;Hymenoptera;Epeolus cruciger;Epeolus cruciger;1;Epeolus cruciger;0.999991025773648;  
 KJ836480;Hymenoptera;Halictus leucaheneus;Halictus leucaheneus;1;Halictus leucaheneus;1;  
 KJ836497;Hymenoptera;Lasioglossum costulatum;Lasioglossum costulatum;1;Lasioglossum costulatum;1;  
 KJ836503;Hymenoptera;Dufourea dentiventris;Dufourea dentiventris;1;Dufourea dentiventris;1;  
 KJ836586;Hymenoptera;Halictus quadricinctus;Halictus quadricinctus;1;Halictus quadricinctus;1;  
 KJ836601;Hymenoptera;Colletes fodiens;Colletes fodiens;1;Colletes fodiens;0.995561860742147;  
 KJ836607;Hymenoptera;Melitturga clavicornis;Melitturga clavicornis;1;Melitturga clavicornis;1;  
 KJ836625;Hymenoptera;Lasioglossum xanthopus;Lasioglossum xanthopus;1;Lasioglossum xanthopus;0.99999999996703;  
 KJ836647;Hymenoptera;Sphecodes croaticus;Sphecodes croaticus;1;Sphecodes croaticus;0.999626107200707;  
 KJ836696;Hymenoptera;Nomada villosa;NA;NA;Nomada striata;0.894506833279756;  
 KJ836750;Hymenoptera;Epeolus cruciger;NA;0.16;Epeolus cruciger;0.968204513358466;



KJ836759;Hymenoptera;Lasioglossum costulatum;Lasioglossum costulatum;1;Lasioglossum costulatum;1;  
KJ836762;Hymenoptera;Sphecodes schenckii;Sphecodes schenckii;1;Sphecodes schenckii;0.99999987608362;  
KJ836795;Hymenoptera;Bombus confusus;Bombus confusus;1;Bombus confusus;0.99999998595996;  
KJ836805;Hymenoptera;Colletes fodiens;Colletes fodiens;1;Colletes fodiens;0.998407648597494;  
KJ836819;Hymenoptera;Systropha curvicornis;NA;NA;Systropha curvicornis;1;  
KJ836821;Hymenoptera;Halictus leucaheneus;Halictus leucaheneus;1;Halictus leucaheneus;1;  
KJ836829;Hymenoptera;Halictus quadricinctus;Halictus quadricinctus;1;Halictus quadricinctus;1;  
KJ836861;Hymenoptera;Halictus quadricinctus;Halictus quadricinctus;1;Halictus quadricinctus;1;  
KJ836882;Hymenoptera;Nomada armata;Nomada armata;1;Nomada armata;0.9999999960724;  
KJ836900;Hymenoptera;Lasioglossum pygmaeum;Lasioglossum pygmaeum;1;Lasioglossum pygmaeum;1;  
KJ836931;Hymenoptera;Lasioglossum pygmaeum;Lasioglossum pygmaeum;1;Lasioglossum pygmaeum;0.99999999999972;  
KJ836940;Hymenoptera;Halictus quadricinctus;Halictus quadricinctus;1;Halictus quadricinctus;1;  
KJ836971;Hymenoptera;Lasioglossum pygmaeum;Lasioglossum pygmaeum;1;Lasioglossum pygmaeum;0.99999999999972;  
KJ836978;Hymenoptera;Sphecodes schenckii;Sphecodes schenckii;1;Sphecodes schenckii;0.99999914431076;  
KJ836981;Hymenoptera;Andrena hattorfiana;Andrena hattorfiana;1;Andrena hattorfiana;1;  
KJ836993;Hymenoptera;Melitturga clavicornis;Melitturga clavicornis;1;Melitturga clavicornis;1;  
KJ837051;Hymenoptera;Sphecodes majalis;Sphecodes majalis;1;Sphecodes majalis;1;  
KJ837055;Hymenoptera;Halictus quadricinctus;Halictus quadricinctus;1;Halictus quadricinctus;1;  
KJ837071;Hymenoptera;Nomada argentata;Nomada argentata;1;Nomada argentata;0.999999793404861;  
KJ837086;Hymenoptera;Lasioglossum costulatum;Lasioglossum costulatum;1;Lasioglossum costulatum;1;  
KJ837113;Hymenoptera;Anthophora balneorum;Anthophora balneorum;1;Anthophora balneorum;1;  
KJ837131;Hymenoptera;Bombus monticola;Bombus monticola;1;Bombus monticola;0.99982316997635;  
KJ837145;Hymenoptera;Nomada armata;Nomada armata;1;Nomada armata;0.9999999960724;  
KJ837146;Hymenoptera;Dufourea dentiventris;Dufourea dentiventris;1;Dufourea dentiventris;1;  
KJ837151;Hymenoptera;Dufourea minuta;Dufourea minuta;1;Dufourea minuta;1;  
KJ837195;Hymenoptera;Halictus quadricinctus;Halictus quadricinctus;1;Halictus quadricinctus;1;  
KJ837235;Hymenoptera;Sphecodes croaticus;Sphecodes croaticus;1;Sphecodes croaticus;0.999626107200707;  
KJ837294;Hymenoptera;Sphecodes hyalinatus;Sphecodes hyalinatus;1;Sphecodes hyalinatus;0.999840844068618;  
KJ837312;Hymenoptera;Dufourea minuta;Dufourea minuta;1;Dufourea minuta;1;  
KJ837357;Hymenoptera;Lasioglossum costulatum;Lasioglossum costulatum;1;Lasioglossum costulatum;1;  
KJ837367;Hymenoptera;Dufourea dentiventris;Dufourea dentiventris;1;Dufourea dentiventris;1;  
KJ837407;Hymenoptera;Andrena hattorfiana;Andrena hattorfiana;1;Andrena hattorfiana;1;  
KJ837418;Hymenoptera;Halictus leucaheneus;Halictus leucaheneus;1;Halictus leucaheneus;1;  
KJ837424;Hymenoptera;Andrena hattorfiana;Andrena hattorfiana;1;Andrena hattorfiana;1;  
KJ837444;Hymenoptera;Dufourea inermis;Dufourea inermis;1;Dufourea inermis;1;  
KJ837459;Hymenoptera;Andrena ovatula;Andrena ovatula;1;Andrena ovatula;0.99999999948159;  
KJ837462;Hymenoptera;Lasioglossum sexnotatum;Lasioglossum sexnotatum;1;Lasioglossum sexnotatum;1;  
KJ837472;Hymenoptera;Colletes succinctus;NA;NA;NA;0.99999999999249;  
KJ837501;Hymenoptera;Bombus gerstaeckeri;Bombus gerstaeckeri;1;Bombus gerstaeckeri;0.99999996373589;  
KJ837507;Hymenoptera;Nomada roberjeotiana;Nomada roberjeotiana;NA;Nomada roberjeotiana;0.999200188838259;  
KJ837522;Hymenoptera;Andrena hattorfiana;Andrena hattorfiana;1;Andrena hattorfiana;1;  
KJ837543;Hymenoptera;Bombus monticola;Bombus monticola;1;Bombus monticola;0.999853543369091;  
KJ837571;Hymenoptera;Lasioglossum pygmaeum;Lasioglossum pygmaeum;1;Lasioglossum pygmaeum;0.999999999999943;  
KJ837646;Hymenoptera;Sphecodes croaticus;Sphecodes croaticus;1;Sphecodes croaticus;0.999626107200707;  
KJ837657;Hymenoptera;Sphecodes schenckii;Sphecodes schenckii;1;Sphecodes schenckii;0.99999987608362;  
KJ837659;Hymenoptera;Lasioglossum intermedium;Lasioglossum semilucens;1;Lasioglossum semilucens;0.999968997288772;  
KJ837664;Hymenoptera;Colletes fodiens;Colletes fodiens;1;Colletes fodiens;0.997405602727073;  
KJ837682;Hymenoptera;Anthidium montanum;Anthidium montanum;1;Anthidium montanum;1;  
KJ837685;Hymenoptera;Halictus quadricinctus;Halictus quadricinctus;1;Halictus quadricinctus;1;  
KJ837694;Hymenoptera;Anthidium montanum;Anthidium montanum;1;Anthidium montanum;1;  
KJ837759;Hymenoptera;Lasioglossum costulatum;Lasioglossum costulatum;1;Lasioglossum costulatum;1;  
KJ837817;Hymenoptera;Nomada roberjeotiana;Nomada tormentillae;0.001;Nomada tormentillae;0.994413505246577;  
KJ837889;Hymenoptera;Lasioglossum xanthopus;Lasioglossum xanthopus;1;Lasioglossum xanthopus;0.99999999996703;  
KJ837905;Hymenoptera;Epeolus cruciger;Epeolus cruciger;0.006;Epeolus cruciger;0.999990871561691;  
KJ837909;Hymenoptera;Sphecodes majalis;Sphecodes majalis;1;Sphecodes majalis;1;  
KJ837921;Hymenoptera;Sphecodes hyalinatus;Sphecodes hyalinatus;0.003;Sphecodes hyalinatus;0.999309335480466;  
KJ837937;Hymenoptera;Lasioglossum costulatum;Lasioglossum costulatum;1;Lasioglossum costulatum;1;

KJ837955;Hymenoptera;Dufourea minuta;Dufourea minuta;1;Dufourea minuta;1;  
KJ837961;Hymenoptera;Lasioglossum clypeare;Lasioglossum clypeare;1;Lasioglossum  
clypeare;0.99999999976194;  
KJ837980;Hymenoptera;Halictus quadricinctus;Halictus quadricinctus;1;Halictus quadricinctus;1;  
KJ837984;Hymenoptera;Lasioglossum xanthopus;Lasioglossum xanthopus;1;Lasioglossum  
xanthopus;0.99999999996703;  
KJ838013;Hymenoptera;Colletes fodiens;Colletes fodiens;1;Colletes fodiens;0.998407648597494;  
KJ838016;Hymenoptera;Lasioglossum minutulum;Lasioglossum minutulum;1;Lasioglossum minutulum;1;  
KJ838052;Hymenoptera;Epeolus cruciger;NA;0.444;Epeolus cruciger;0.97602694074939;  
KJ838072;Hymenoptera;Lasioglossum costulatum;Lasioglossum costulatum;1;Lasioglossum  
costulatum;1;  
KJ838083;Hymenoptera;Halictus quadricinctus;Halictus quadricinctus;1;Halictus quadricinctus;1;  
KJ838091;Hymenoptera;Lasioglossum sexnotatum;Lasioglossum sexnotatum;1;Lasioglossum  
sexnotatum;1;  
KJ838094;Hymenoptera;Colletes fodiens;Colletes fodiens;1;Colletes fodiens;0.996818485731277;  
KJ838122;Hymenoptera;Andrena ovatula;Andrena ovatula;1;Andrena ovatula;0.999999999948159;  
KJ838139;Hymenoptera;Lasioglossum sexnotatum;Lasioglossum sexnotatum;1;Lasioglossum  
sexnotatum;0.99999999999972;  
KJ838146;Hymenoptera;Epeolus cruciger;NA;0.113;Epeolus cruciger;0.989220250066161;  
KJ838166;Hymenoptera;Colletes succinctus;Colletes succinctus;NA;Colletes  
succinctus;0.998404218350284;  
KJ838182;Hymenoptera;Halictus leucaheneus;Halictus leucaheneus;1;Halictus leucaheneus;1;  
KJ838212;Hymenoptera;Lasioglossum intermedium;Lasioglossum intermedium;1;Lasioglossum  
intermedium;0.99999999999346;  
KJ838262;Hymenoptera;Lasioglossum intermedium;Lasioglossum intermedium;1;Lasioglossum  
intermedium;0.99999999999176;  
KJ838272;Hymenoptera;Halictus leucaheneus;Halictus leucaheneus;1;Halictus leucaheneus;1;  
KJ838279;Hymenoptera;Lasioglossum sexnotatum;Lasioglossum sexnotatum;1;Lasioglossum  
sexnotatum;1;  
KJ838299;Hymenoptera;Lasioglossum sexnotatum;Lasioglossum sexnotatum;1;Lasioglossum  
sexnotatum;1;  
KJ838315;Hymenoptera;Colletes floralis;Colletes floralis;1;Colletes floralis;0.999999992581081;  
KJ838327;Hymenoptera;Lasioglossum subfasciatum;Lasioglossum subfasciatum;1;Lasioglossum  
subfasciatum;1;  
KJ838335;Hymenoptera;Lasioglossum pygmaeum;Lasioglossum pygmaeum;1;Lasioglossum  
pygmaeum;0.99999999999972;  
KJ838347;Hymenoptera;Andrena ovatula;Andrena ovatula;1;Andrena ovatula;0.999999999906834;  
KJ838349;Hymenoptera;Bombus monticola;Bombus monticola;1;Bombus monticola;0.99982316997635;  
KJ838355;Hymenoptera;Andrena hattorfiana;Andrena hattorfiana;1;Andrena hattorfiana;1;  
KJ838360;Hymenoptera;Nomada argentata;Nomada argentata;1;Nomada argentata;0.999999113245446;  
KJ838365;Hymenoptera;Epeolus cruciger;Epeolus cruciger;0.007;Epeolus cruciger;0.999740282277555;  
KJ838382;Hymenoptera;Halictus leucaheneus;Halictus leucaheneus;1;Halictus leucaheneus;1;  
KJ838387;Hymenoptera;Lasioglossum costulatum;Lasioglossum costulatum;1;Lasioglossum  
costulatum;1;  
KJ838397;Hymenoptera;Andrena ovatula;Andrena ovatula;1;Andrena ovatula;0.999999999973568;  
KJ838401;Hymenoptera;Colletes floralis;Colletes floralis;1;Colletes floralis;0.999999992581081;  
KJ838431;Hymenoptera;Melitturga clavicornis;Melitturga clavicornis;1;Melitturga clavicornis;1;  
KJ838435;Hymenoptera;Colletes fodiens;Colletes fodiens;1;Colletes fodiens;0.996818485731277;  
KJ838456;Hymenoptera;Bombus monticola;Bombus monticola;1;Bombus monticola;0.99982316997635;  
KJ838494;Hymenoptera;Lasioglossum subfasciatum;Lasioglossum subfasciatum;1;Lasioglossum  
subfasciatum;0.99999999999915;  
KJ838502;Hymenoptera;Dasypoda suripes;Dasypoda suripes;1;Dasypoda suripes;1;  
KJ838510;Hymenoptera;Halictus quadricinctus;Halictus quadricinctus;1;Halictus quadricinctus;1;  
KJ838551;Hymenoptera;Colletes fodiens;Colletes fodiens;1;Colletes fodiens;0.997405602727073;  
KJ838554;Hymenoptera;Sphecodes majalis;Sphecodes majalis;1;Sphecodes majalis;1;  
KJ838566;Hymenoptera;Halictus leucaheneus;Halictus leucaheneus;1;Halictus leucaheneus;1;  
KJ838574;Hymenoptera;Halictus quadricinctus;Halictus quadricinctus;1;Halictus quadricinctus;1;  
KJ838610;Hymenoptera;Dufourea minuta;Dufourea minuta;1;Dufourea minuta;1;  
KJ838622;Hymenoptera;Dufourea dentiventris;Dufourea dentiventris;1;Dufourea dentiventris;1;  
KJ838657;Hymenoptera;Colletes graeffei;Colletes graeffei;1;Colletes graeffei;0.999994471118605;  
KJ838659;Hymenoptera;Andrena hattorfiana;Andrena hattorfiana;1;Andrena hattorfiana;1;  
KJ838670;Hymenoptera;Halictus quadricinctus;Halictus quadricinctus;1;Halictus quadricinctus;1;  
KJ838713;Hymenoptera;Nomada mutica;Nomada mutica;1;Nomada mutica;0.999999788779314;  
KJ838749;Hymenoptera;Melitta tricineta;Melitta tricineta;NA;Melitta tricineta;1;  
KJ838754;Hymenoptera;Lasioglossum marginellum;Lasioglossum marginellum;1;Lasioglossum  
marginellum;0.999999999966604;  
KJ838761;Hymenoptera;Halictus quadricinctus;Halictus quadricinctus;1;Halictus quadricinctus;1;  
KJ838797;Hymenoptera;Bombus confusus;Bombus confusus;1;Bombus confusus;0.99999998595996;  
KJ838805;Hymenoptera;Sphecodes hyalinatus;Sphecodes ferruginatus;1;Sphecodes  
ferruginatus;0.997700529625535;  
KJ838806;Hymenoptera;Lasioglossum marginellum;Lasioglossum marginellum;1;Lasioglossum  
marginellum;0.99999999989882;  
KJ838824;Hymenoptera;Sphecodes hyalinatus;Sphecodes hyalinatus;1;Sphecodes  
hyalinatus;0.999905579082925;  
KJ838837;Hymenoptera;Nomada roberjeotiana;Nomada roberjeotiana;NA;Nomada  
roberjeotiana;0.995138562210576;  
KJ838844;Hymenoptera;Colletes fodiens;Colletes fodiens;1;Colletes fodiens;0.999099301831391;  
KJ838873;Hymenoptera;Dufourea minuta;Dufourea minuta;1;Dufourea minuta;1;

KJ838918;Hymenoptera;Colletes fodiens;Colletes fodiens;1;Colletes fodiens;0.998407648597494;  
KJ838972;Hymenoptera;Sphecodes hyalinatus;Sphecodes hyalinatus;0.004;Sphecodes  
hyalinatus;0.997030930666154;  
KJ839017;Hymenoptera;Bombus mucidus;Bombus mucidus;1;Bombus mucidus;0.999986904807707;  
KJ839032;Hymenoptera;Andrena fulvida;Andrena fulvida;1;Andrena fulvida;0.99999999969646;  
KJ839051;Hymenoptera;Sphecodes schenckii;Sphecodes schenckii;1;Sphecodes  
schenckii;0.999999987608362;  
KJ839066;Hymenoptera;Halictus leucaheneus;Halictus leucaheneus;1;Halictus leucaheneus;1;  
KJ839075;Hymenoptera;Halictus leucaheneus;Halictus leucaheneus;1;Halictus leucaheneus;1;  
KJ839082;Hymenoptera;Halictus quadricinctus;Halictus quadricinctus;1;Halictus quadricinctus;1;  
KJ839125;Hymenoptera;Halictus quadricinctus;Halictus quadricinctus;1;Halictus quadricinctus;1;  
KJ839146;Hymenoptera;Anthidium montanum;Anthidium montanum;1;Anthidium montanum;1;  
KJ839149;Hymenoptera;Lasioglossum majus;Lasioglossum majus;1;Lasioglossum  
majus;0.999337899533515;  
KJ839169;Hymenoptera;Lasioglossum costulatum;Lasioglossum costulatum;1;Lasioglossum  
costulatum;1;  
KJ839220;Hymenoptera;Lasioglossum costulatum;Lasioglossum costulatum;1;Lasioglossum  
costulatum;1;  
KJ839232;Hymenoptera;Epeolus cruciger;NA;0.444;Epeolus cruciger;0.97602694074939;  
KJ839248;Hymenoptera;Lasioglossum costulatum;Lasioglossum costulatum;1;Lasioglossum  
costulatum;1;  
KJ839257;Hymenoptera;Epeolus cruciger;Epeolus cruciger;1;Epeolus cruciger;0.999991025773648;  
KJ839281;Hymenoptera;Nomada roberjeotiana;Nomada roberjeotiana;NA;Nomada  
roberjeotiana;0.998244023166367;  
KJ839283;Hymenoptera;Lasioglossum sexnotatum;Lasioglossum sexnotatum;1;Lasioglossum  
sexnotatum;1;  
KJ839292;Hymenoptera;Halictus quadricinctus;Halictus quadricinctus;1;Halictus quadricinctus;1;  
KJ839303;Hymenoptera;Andrena ovatula;Andrena ovatula;1;Andrena ovatula;0.999999996087297;  
KJ839342;Hymenoptera;Anthophora balneorum;Anthophora balneorum;1;Anthophora balneorum;1;  
KJ839343;Hymenoptera;Halictus quadricinctus;Halictus quadricinctus;1;Halictus quadricinctus;1;  
KJ839352;Hymenoptera;Andrena ovatula;Andrena ovatula;1;Andrena ovatula;0.99999999948159;  
KJ839357;Hymenoptera;Sphecodes hyalinatus;Sphecodes hyalinatus;0.002;Sphecodes  
hyalinatus;0.999725249832498;  
KJ839367;Hymenoptera;Colletes fodiens;Colletes fodiens;1;Colletes fodiens;0.997718007726496;  
KJ839403;Hymenoptera;Lasioglossum minutulum;Lasioglossum minutulum;1;Lasioglossum minutulum;1;  
KJ839413;Hymenoptera;Lasioglossum costulatum;Lasioglossum costulatum;1;Lasioglossum  
costulatum;1;  
KJ839438;Hymenoptera;Sphecodes hyalinatus;Sphecodes hyalinatus;1;Sphecodes  
hyalinatus;0.999684471272531;  
KJ839448;Hymenoptera;Nomada symphyti;Nomada symphyti;0.001;Nomada symphyti;0.83870428014373;  
KJ839457;Hymenoptera;Halictus quadricinctus;Halictus quadricinctus;1;Halictus quadricinctus;1;  
KJ839462;Hymenoptera;Epeolus cruciger;Epeolus cruciger;1;Epeolus cruciger;0.999987310741053;  
KJ839467;Hymenoptera;Andrena hattorfiana;Andrena hattorfiana;1;Andrena hattorfiana;1;  
KJ839488;Hymenoptera;Lasioglossum costulatum;Lasioglossum costulatum;1;Lasioglossum  
costulatum;1;  
KJ839506;Hymenoptera;Dufourea dentiventris;Dufourea dentiventris;1;Dufourea dentiventris;1;  
KJ839509;Hymenoptera;Andrena fulvida;Andrena fulvida;1;Andrena fulvida;0.999999991289314;  
KJ839532;Hymenoptera;Epeolus cruciger;NA;0.053;Epeolus cruciger;0.98986705678984;  
KJ839568;Hymenoptera;Andrena hattorfiana;Andrena hattorfiana;1;Andrena hattorfiana;1;  
KJ839581;Hymenoptera;Halictus quadricinctus;Halictus quadricinctus;1;Halictus quadricinctus;1;  
KJ839600;Hymenoptera;Sphecodes croaticus;Sphecodes croaticus;1;Sphecodes  
croaticus;0.999626107200707;  
KJ839604;Hymenoptera;Lasioglossum xanthopus;Lasioglossum xanthopus;1;Lasioglossum  
xanthopus;0.99999999994827;  
KJ839614;Hymenoptera;Colletes graeffei;Colletes graeffei;1;Colletes graeffei;0.99997885499217;  
KJ839622;Hymenoptera;Lasioglossum quadrinotatum;Lasioglossum quadrinotatum;1;Lasioglossum  
quadrinotatum;0.99999999999773;  
KJ839643;Hymenoptera;Lasioglossum pygmaeum;Lasioglossum pygmaeum;1;Lasioglossum  
pygmaeum;0.99999999999972;  
KJ839683;Hymenoptera;Halictus quadricinctus;Halictus quadricinctus;1;Halictus quadricinctus;1;  
KJ839709;Hymenoptera;Lasioglossum costulatum;Lasioglossum costulatum;1;Lasioglossum  
costulatum;1;  
KJ839712;Hymenoptera;Sphecodes schenckii;Sphecodes schenckii;1;Sphecodes  
schenckii;0.999999993159065;  
KJ839748;Hymenoptera;Colletes fodiens;Colletes fodiens;1;Colletes fodiens;0.997405602727073;  
KJ839760;Hymenoptera;Sphecodes hyalinatus;Sphecodes hyalinatus;0.013;Sphecodes  
hyalinatus;0.994070562207568;  
KJ839765;Hymenoptera;Colletes fodiens;Colletes fodiens;1;Colletes fodiens;0.998407648597494;  
KJ839776;Hymenoptera;Halictus leucaheneus;Halictus leucaheneus;1;Halictus leucaheneus;1;  
KJ839801;Hymenoptera;Lasioglossum majus;Lasioglossum majus;1;Lasioglossum  
majus;0.999337899533515;  
KJ839806;Hymenoptera;Andrena hattorfiana;Andrena hattorfiana;1;Andrena hattorfiana;1;  
KJ839822;Hymenoptera;Melitturga clavicornis;Melitturga clavicornis;1;Melitturga clavicornis;1;  
KJ839824;Hymenoptera;Lasioglossum subfasciatum;Lasioglossum subfasciatum;1;Lasioglossum  
subfasciatum;0.99999999999972;  
KJ839830;Hymenoptera;Epeolus cruciger;Epeolus cruciger;0.999;Epeolus cruciger;0.999984954461876;  
KT074041;Hymenoptera;Colletes fodiens;Colletes fodiens;1;Colletes fodiens;0.99729303447681;

KT334300;Hymenoptera;Bombus gerstaeckeri;Bombus gerstaeckeri;1;Bombus gerstaeckeri;0.999999995486064;  
KX374788;Hymenoptera;Lasioglossum sexnotatum;Lasioglossum sexnotatum;1;Lasioglossum sexnotatum;1;  
KX374792;Hymenoptera;Lasioglossum brevicorne;Lasioglossum brevicorne;1;Lasioglossum brevicorne;0.999999997608256;  
KY317973;Hymenoptera;Bombus konradini;NA;NA;Bombus glacialis;0.915229021264775;  
KY317975;Hymenoptera;Bombus monticola;Bombus monticola;0.002;Bombus glacialis;0.954328173808283;  
KY317976;Hymenoptera;Bombus monticola;Bombus monticola;0.001;Bombus glacialis;0.971450548213942;  
KY317977;Hymenoptera;Bombus monticola;Bombus monticola;0.001;Bombus glacialis;0.95553046739416;  
KY317978;Hymenoptera;Bombus monticola;Bombus monticola;0.002;Bombus glacialis;0.945259030457934;  
KY317979;Hymenoptera;Bombus monticola;Bombus monticola;0.005;Bombus glacialis;0.97163987978333;  
KY317980;Hymenoptera;Bombus monticola;Bombus monticola;0.002;Bombus glacialis;0.954328173808283;  
LASNA304-08;Hymenoptera;Lasioglossum xanthopus;Lasioglossum xanthopus;1;Lasioglossum xanthopus;0.999999999995936;  
LASNA398-08;Hymenoptera;Lasioglossum xanthopus;Lasioglossum xanthopus;1;Lasioglossum xanthopus;0.999999999995936;  
MG309777;Hymenoptera;Bombus mucidus;Bombus mucidus;1;Bombus mucidus;0.999989597318141;  
MG846706;Hymenoptera;Lasioglossum laevigatum;Lasioglossum laevigatum;1;Lasioglossum laevigatum;0.99999999999915;  
MK268705;Hymenoptera;Sphecodes hyalinatus;Sphecodes hyalinatus;1;Sphecodes hyalinatus;0.999357142058941;  
MN342315;Hymenoptera;Epeolus tarsalis;Epeolus tarsalis;1;Epeolus tarsalis;0.999967462753482;  
MN342316;Hymenoptera;Triepeolus tristis;Triepeolus tristis;1;Triepeolus tristis;0.99999999999289;  
MN342321;Hymenoptera;Epeolus cruciger;Epeolus cruciger;1;Epeolus cruciger;0.999993974779177;  
MT869002;Hymenoptera;Halictus quadricinctus;Halictus quadricinctus;1;Halictus quadricinctus;1;  
MT869193;Hymenoptera;Halictus quadricinctus;Halictus quadricinctus;1;Halictus quadricinctus;1;  
MT869239;Hymenoptera;Halictus quadricinctus;Halictus quadricinctus;1;Halictus quadricinctus;1;  
MT869247;Hymenoptera;Halictus quadricinctus;Halictus quadricinctus;1;Halictus quadricinctus;1;  
MT869460;Hymenoptera;Halictus quadricinctus;Halictus quadricinctus;1;Halictus quadricinctus;1;  
quadricinctus;0.999999999999687;  
MT869542;Hymenoptera;Halictus quadricinctus;Halictus quadricinctus;1;Halictus quadricinctus;1;  
MT869551;Hymenoptera;Colletes fodiens;Colletes fodiens;1;Colletes fodiens;0.999261790595922;  
MT869558;Hymenoptera;Halictus quadricinctus;Halictus quadricinctus;1;Halictus quadricinctus;1;  
MT869605;Hymenoptera;Halictus quadricinctus;Halictus quadricinctus;1;Halictus quadricinctus;1;  
MT869656;Hymenoptera;Lasioglossum pygmaeum;Lasioglossum pygmaeum;1;Lasioglossum pygmaeum;0.99999999999972;  
MT869675;Hymenoptera;Halictus quadricinctus;Halictus quadricinctus;1;Halictus quadricinctus;1;  
MT869719;Hymenoptera;Lasioglossum intermedium;Lasioglossum intermedium;1;Lasioglossum intermedium;0.99999999999744;  
MT869798;Hymenoptera;Halictus quadricinctus;Halictus quadricinctus;1;Halictus quadricinctus;1;  
MT869810;Hymenoptera;Halictus quadricinctus;Halictus quadricinctus;1;Halictus quadricinctus;1;  
MT869939;Hymenoptera;Halictus quadricinctus;Halictus quadricinctus;1;Halictus quadricinctus;0.99999999999972;  
MT869997;Hymenoptera;Andrena ovatula;Andrena albofasciata;1;Andrena albofasciata;0.999820113441725;  
MT870176;Hymenoptera;Halictus quadricinctus;Halictus quadricinctus;1;Halictus quadricinctus;1;  
MT870247;Hymenoptera;Halictus quadricinctus;Halictus quadricinctus;1;Halictus quadricinctus;1;  
MT870277;Hymenoptera;Lasioglossum sexnotatum;Lasioglossum sexnotatum;1;Lasioglossum sexnotatum;1;  
MT870298;Hymenoptera;Lasioglossum sexnotatum;Lasioglossum sexnotatum;1;Lasioglossum sexnotatum;1;  
MT870325;Hymenoptera;Lasioglossum xanthopus;Lasioglossum xanthopus;1;Lasioglossum xanthopus;0.999999999996618;  
MT870353;Hymenoptera;Halictus quadricinctus;Halictus quadricinctus;1;Halictus quadricinctus;1;  
MT870361;Hymenoptera;Lasioglossum xanthopus;Lasioglossum xanthopus;1;Lasioglossum xanthopus;0.999999999996618;  
MT870444;Hymenoptera;Lasioglossum sexnotatum;Lasioglossum sexnotatum;1;Lasioglossum sexnotatum;1;  
MT870531;Hymenoptera;Halictus quadricinctus;Halictus quadricinctus;1;Halictus quadricinctus;1;  
MT870680;Hymenoptera;Sphecodes majalis;Sphecodes majalis;1;Sphecodes majalis;1;  
MT870742;Hymenoptera;Halictus quadricinctus;Halictus quadricinctus;1;Halictus quadricinctus;1;  
MT870786;Hymenoptera;Lasioglossum sexnotatum;Lasioglossum sexnotatum;1;Lasioglossum sexnotatum;1;  
MT870845;Hymenoptera;Halictus quadricinctus;Halictus quadricinctus;1;Halictus quadricinctus;1;  
MT870991;Hymenoptera;Lasioglossum sexnotatum;Lasioglossum sexnotatum;1;Lasioglossum sexnotatum;1;  
MT871060;Hymenoptera;Lasioglossum majus;Lasioglossum majus;1;Lasioglossum majus;0.99927239707714;  
MT871075;Hymenoptera;Halictus quadricinctus;Halictus quadricinctus;1;Halictus quadricinctus;1;  
MT871127;Hymenoptera;Halictus quadricinctus;Halictus quadricinctus;1;Halictus quadricinctus;1;  
MT871182;Hymenoptera;Lasioglossum sexnotatum;Lasioglossum sexnotatum;1;Lasioglossum sexnotatum;1;  
MT871225;Hymenoptera;Halictus quadricinctus;Halictus quadricinctus;1;Halictus quadricinctus;1;  
MT871278;Hymenoptera;Halictus quadricinctus;Halictus quadricinctus;1;Halictus quadricinctus;1;  
MT871459;Hymenoptera;Halictus quadricinctus;Halictus quadricinctus;1;Halictus quadricinctus;1;

MT871538;Hymenoptera;Lasioglossum sexnotatum;Lasioglossum sexnotatum;1;Lasioglossum sexnotatum;1;  
MT871640;Hymenoptera;Halictus quadricinctus;Halictus quadricinctus;1;Halictus quadricinctus;1;  
MT871678;Hymenoptera;Halictus quadricinctus;Halictus quadricinctus;1;Halictus quadricinctus;1;  
MT871821;Hymenoptera;Halictus quadricinctus;Halictus quadricinctus;1;Halictus quadricinctus;1;  
MT871840;Hymenoptera;Lasioglossum sexnotatum;Lasioglossum sexnotatum;1;Lasioglossum sexnotatum;1;  
MZ607516;Hymenoptera;Bombus monticola;Bombus monticola;0.987;Bombus monticola;0.891228347514907;  
MZ608606;Hymenoptera;Bombus monticola;Bombus monticola;1;Bombus monticola;0.99978633943506;  
MZ609007;Hymenoptera;Bombus monticola;Bombus monticola;1;Bombus monticola;0.999746210653439;  
MZ609350;Hymenoptera;Bombus monticola;Bombus monticola;0.99;Bombus monticola;0.789282477969724;  
MZ622896;Hymenoptera;Colletes floralis;Colletes floralis;1;Colletes floralis;0.99999932107075;  
MZ623000;Hymenoptera;Nomada roberjeotiana;Nomada tormentillae;0.993;Nomada tormentillae;0.924350479033569;  
MZ623535;Hymenoptera;Andrena hattorfiana;Andrena hattorfiana;1;Andrena hattorfiana;1;  
MZ624205;Hymenoptera;Nomada roberjeotiana;Nomada roberjeotiana;NA;Nomada roberjeotiana;0.998244023166367;  
MZ624361;Hymenoptera;Bombus monticola;NA;0.001;Bombus monticola;0.805007038902856;  
MZ624859;Hymenoptera;Nomada armata;Nomada armata;1;Nomada armata;0.99999999472777;  
MZ625293;Hymenoptera;Nomada roberjeotiana;NA;NA;Nomada roberjeotiana;0.98474768386597;  
MZ625426;Hymenoptera;Epeolus cruciger;Epeolus cruciger;1;Epeolus cruciger;0.99991286625705;  
MZ625443;Hymenoptera;Epeolus cruciger;Epeolus cruciger;1;Epeolus cruciger;0.999995772456612;  
MZ625473;Hymenoptera;Andrena fulvida;Andrena fulvida;1;Andrena fulvida;0.99999696975965;  
MZ625851;Hymenoptera;Dufourea minuta;Dufourea minuta;1;Dufourea minuta;1;  
MZ625877;Hymenoptera;Andrena fulvida;Andrena fulvida;1;Andrena fulvida;0.99999999911324;  
MZ625887;Hymenoptera;Epeolus cruciger;Epeolus cruciger;0.001;Epeolus cruciger;0.99997288199024;  
MZ626347;Hymenoptera;Bombus muscorum;NA;0.166;Bombus humilis;0.998047355529146;  
MZ626543;Hymenoptera;Dufourea minuta;Dufourea minuta;1;Dufourea minuta;1;  
MZ626598;Hymenoptera;Sphecodes hyalinatus;NA;0.222;Sphecodes hyalinatus;0.997362228792556;  
MZ626770;Hymenoptera;Hylaeus pfankuchi;NA;0.056;Hylaeus pfankuchi;0.998085912521369;  
MZ627178;Hymenoptera;Nomada roberjeotiana;Nomada roberjeotiana;NA;Nomada roberjeotiana;0.998244023166367;  
MZ627860;Hymenoptera;Andrena fulvida;Andrena fulvida;1;Andrena fulvida;0.99999999911324;  
MZ627897;Hymenoptera;Epeolus cruciger;Epeolus cruciger;0.998;Epeolus cruciger;0.999991684417338;  
MZ628204;Hymenoptera;Nomada roberjeotiana;Nomada roberjeotiana;NA;Nomada roberjeotiana;0.998244023166367;  
MZ628487;Hymenoptera;Bombus alpinus;Bombus alpinus;1;Bombus alpinus;0.999999924887081;  
MZ628607;Hymenoptera;Bombus monticola;Bombus monticola;0.987;Bombus monticola;0.891228347514907;  
MZ628725;Hymenoptera;Lasioglossum quadrinotatum;Lasioglossum quadrinotatum;1;Lasioglossum quadrinotatum;0.99999999999773;  
MZ628821;Hymenoptera;Colletes succinctus;NA;NA;NA;0.99999999999502;  
NOBEE070-09;Hymenoptera;Epeolus cruciger;NA;0.321;Epeolus cruciger;0.975892562359686;  
NOBEE071-09;Hymenoptera;Epeolus cruciger;NA;0.444;Epeolus cruciger;0.97602694074939;  
TDAAT1041-20;Hymenoptera;Nomada armata;Nomada armata;1;Nomada armata;0.99999999960724;  
TDAAT1044-20;Hymenoptera;Andrena hattorfiana;Andrena hattorfiana;1;Andrena hattorfiana;1;  
TDAAT1324-20;Hymenoptera;Bombus mucus;Bombus mucus;1;Bombus mucus;0.999992778697884;  
TDAAT1325-20;Hymenoptera;Bombus mendax;Bombus mendax;1;Bombus mendax;0.9999999999406;  
TDAAT1329-20;Hymenoptera;Bombus alpinus;Bombus alpinus;1;Bombus alpinus;0.999999963060674;  
TDAAT1330-20;Hymenoptera;Bombus alpinus;Bombus alpinus;1;Bombus alpinus;0.999999963060674;  
TDAAT1331-20;Hymenoptera;Bombus monticola;Bombus monticola;1;Bombus monticola;0.99982316997635;  
TDAAT1332-20;Hymenoptera;Bombus monticola;Bombus monticola;1;Bombus monticola;0.99982316997635;  
TDAAT1344-20;Hymenoptera;Bombus monticola;Bombus monticola;1;Bombus monticola;0.99982316997635;  
TDAAT1491-20;Hymenoptera;Andrena hattorfiana;Andrena hattorfiana;1;Andrena hattorfiana;1;  
TDAAT2093-20;Hymenoptera;Bombus mucus;Bombus mucus;1;Bombus mucus;0.9999961618278;  
TDAOE069-21;Hymenoptera;Andrena ovatula;Andrena wilkella;NA;Andrena wilkella;0.999999449020417;  
TDAOE081-21;Hymenoptera;Andrena hattorfiana;Andrena hattorfiana;1;Andrena hattorfiana;1;  
TDAOE493-21;Hymenoptera;Andrena ovatula;Andrena ovatula;1;Andrena ovatula;0.99999999813497;  
VWB014-18;Hymenoptera;Nomada armata;Nomada armata;1;Nomada armata;0.99999999350706;  
VWB016-18;Hymenoptera;Andrena hattorfiana;Andrena hattorfiana;1;Andrena hattorfiana;1;  
VWB028-18;Hymenoptera;Halictus quadricinctus;Halictus quadricinctus;1;Halictus quadricinctus;1;  
VWB034-18;Hymenoptera;Lasioglossum xanthopus;Lasioglossum xanthopus;0.001;Lasioglossum xanthopus;0.994637020414442;  
VWB037-18;Hymenoptera;Andrena ovatula;Andrena ovatula;1;Andrena ovatula;0.999999968230043;  
WASPS382-14;Hymenoptera;Bombus alpinus;Bombus alpinus;1;Bombus alpinus;0.999999961371487;  
ZMBN809-17;Hymenoptera;Bombus alpinus;NA;0.013;Bombus pyrrhopygus;0.997688466041621;  
ZPLBI007-22;Hymenoptera;Bombus muscorum;Bombus humilis;1;Bombus humilis;0.999136246437524;  
AB674372;Lepidoptera;Erebia euryale;NA;0.301;NA;0.999999999962217;  
AB674384;Lepidoptera;Erebia medusa;NA;0.01;Erebia medusa;0.972811569416705;  
AB674386;Lepidoptera;Erebia medusa;NA;0.018;Erebia medusa;0.982727105014107;  
AB674387;Lepidoptera;Erebia medusa;NA;0.013;Erebia medusa;0.984905305072752;  
AB674388;Lepidoptera;Erebia oeme;NA;0.28;Erebia oeme;0.9999999890909;  
AB674389;Lepidoptera;Erebia oeme;Erebia oeme;0.003;Erebia oeme;0.999999990988101;  
AB674390;Lepidoptera;Erebia oeme;Erebia oeme;0.001;Erebia oeme;0.999999993492906;  
AB674391;Lepidoptera;Erebia oeme;Erebia oeme;0.006;Erebia oeme;0.99999998598241;  
AB674392;Lepidoptera;Erebia oeme;Erebia oeme;0.006;Erebia oeme;0.99999998598241;  
AB674393;Lepidoptera;Erebia ottomana;Erebia ottomana;1;Erebia ottomana;0.9999999688427;  
AB674394;Lepidoptera;Erebia ottomana;Erebia ottomana;1;Erebia ottomana;0.9999999688427;  
AB674395;Lepidoptera;Erebia ottomana;Erebia ottomana;1;Erebia ottomana;0.99999998814303;

AB674396;Lepidoptera;Erebia ottomana;Erebia ottomana;1;Erebia ottomana;0.999999997330434;  
AB674397;Lepidoptera;Erebia ottomana;Erebia ottomana;1;Erebia ottomana;0.999999997165077;  
AB674398;Lepidoptera;Erebia ottomana;Erebia ottomana;1;Erebia ottomana;0.999999997165077;  
AB674399;Lepidoptera;Erebia pandrose;Erebia pandrose;0.004;Erebia pandrose;0.976358963490405;  
AB674400;Lepidoptera;Erebia pandrose;Erebia pandrose;0.027;Erebia pandrose;0.9864806252672;  
ABOLD439-16;Lepidoptera;Satyrium pruni;NA;NA;Satyrium pruni;0.978161568775537;  
ABOLD489-16;Lepidoptera;Lycaena thersamon;Thersamonia thersamon;0.035;Lycaena  
thersamon;0.956733690681528;  
ABOLD490-16;Lepidoptera;Satyrium pruni;NA;NA;Satyrium pruni;0.969814295341849;  
ABOLD492-16;Lepidoptera;Cupido osiris;Cupido osiris;0.999;Cupido osiris;0.999864248064952;  
ABOLD494-16;Lepidoptera;Cupido alcetas;NA;0.002;Cupido alcetas;0.801754491963039;  
ABOLD495-16;Lepidoptera;Coenonympha oedippus;Coenonympha oedippus;1;Coenonympha  
oedippus;0.999999999471498;  
ABOLD497-16;Lepidoptera;Melitaea britomartis;NA;NA;Melitaea britomartis;0.996328395979252;  
ABOLD502-16;Lepidoptera;Melitaea varia;NA;0.001;Melitaea varia;0.976287436532261;  
ABOLD506-16;Lepidoptera;Limenitis populi;Limenitis populi;1;Limenitis populi;0.999995827628958;  
AF153920;Lepidoptera;Euphydryas aurinia;NA;0.307;Euphydryas aurinia;0.918993679737925;  
AF153933;Lepidoptera;Euphydryas maturna;NA;0.125;Euphydryas maturna;0.873338270148348;  
AM262789;Lepidoptera;Anthocharis cardamines;Anthocharis cardamines;1;Anthocharis  
cardamines;0.999989701606745;  
AM262790;Lepidoptera;Anthocharis cardamines;Anthocharis cardamines;1;Anthocharis  
cardamines;0.99999907808788;  
AM262796;Lepidoptera;Anthocharis cardamines;Anthocharis cardamines;1;Anthocharis  
cardamines;0.99999907808788;  
AM262798;Lepidoptera;Anthocharis cardamines;Anthocharis cardamines;1;Anthocharis  
cardamines;0.99999907808788;  
AM262802;Lepidoptera;Anthocharis cardamines;Anthocharis cardamines;1;Anthocharis  
cardamines;0.99999907808788;  
AM262803;Lepidoptera;Anthocharis cardamines;Anthocharis cardamines;1;Anthocharis  
cardamines;0.999993720783938;  
AM262804;Lepidoptera;Anthocharis damone;Anthocharis damone;0.999;Anthocharis  
damone;0.99999654698177;  
AM262806;Lepidoptera;Anthocharis cardamines;NA;0.163;Anthocharis cardamines;0.999498436246391;  
AM262810;Lepidoptera;Anthocharis damone;Anthocharis damone;NA;Anthocharis  
damone;0.99999780755971;  
AM262811;Lepidoptera;Anthocharis damone;Anthocharis damone;0.001;Anthocharis  
damone;0.999996577763313;  
AMTPC042-15;Lepidoptera;Aporia crataegi;NA;0.005;Aporia crataegi;0.999985516587155;  
AMTPC045-15;Lepidoptera;Boloria euphrosyne;Boloria euphrosyne;1;Boloria  
euphrosyne;0.99997773695286;  
AMTPC046-15;Lepidoptera;Melitaea diamina;NA;0.157;Melitaea diamina;0.999999981720549;  
AMTPC047-15;Lepidoptera;Melitaea diamina;NA;0.16;Melitaea diamina;0.999999979251413;  
AMTPC048-15;Lepidoptera;Lasiommata maera;Lasiommata maera;0.029;Lasiommata  
maera;0.999987056003009;  
AMTPC049-15;Lepidoptera;Pyrgus warrenensis;NA;0.002;NA;0.9999999999984;  
AMTPC050-15;Lepidoptera;Ochlodes sylvanus;NA;NA;Ochlodes sylvanus;0.995823680926199;  
AMTPC051-15;Lepidoptera;Cyaniris semiargus;NA;NA;Cyaniris semiargus;0.999101499375485;  
AMTPC052-15;Lepidoptera;Cupido minimus;NA;0.004;Cupido minimus;0.997479807037898;  
AMTPC084-15;Lepidoptera;Erynnis tages;Erynnis tages;1;Erynnis tages;0.999955880826156;  
AMTPC122-15;Lepidoptera;Boloria euphrosyne;Boloria euphrosyne;1;Boloria  
euphrosyne;0.999976943686819;  
AMTPC123-15;Lepidoptera;Lasiommata petropolitana;Lasiommata petropolitana;1;Lasiommata  
petropolitana;0.999997871383917;  
AMTPC124-15;Lepidoptera;Cupido minimus;NA;0.003;Cupido minimus;0.995871121583884;  
AMTPC125-15;Lepidoptera;Aglais urticae;NA;0.001;Aglais urticae;0.986745888835628;  
AMTPC126-15;Lepidoptera;Boloria euphrosyne;Boloria euphrosyne;1;Boloria  
euphrosyne;0.99997773695286;  
AMTPC127-15;Lepidoptera;Cupido minimus;NA;0.008;Cupido minimus;0.998438286349197;  
AMTPC128-15;Lepidoptera;Cupido minimus;NA;0.001;Cupido minimus;0.998843602978539;  
AMTPC129-15;Lepidoptera;Boloria euphrosyne;Boloria euphrosyne;0.998;Boloria  
euphrosyne;0.999973474063339;  
AMTPC130-15;Lepidoptera;Pyrgus warrenensis;NA;0.002;NA;0.9999999999984;  
AMTPC132-15;Lepidoptera;Callophrys rubi;NA;0.009;Callophrys rubi;0.996682294679977;  
AMTPC133-15;Lepidoptera;Boloria euphrosyne;Boloria euphrosyne;0.001;Boloria  
euphrosyne;0.999641955959878;  
AMTPC138-15;Lepidoptera;Gonepteryx rhamni;NA;0.487;Gonepteryx rhamni;0.986058728586698;  
AMTPC139-15;Lepidoptera;Pyrgus malvae;Pyrgus malvae;0.005;Pyrgus malvae;0.986140979485564;  
AMTPC153-15;Lepidoptera;Pyrgus malvae;Pyrgus malvae;0.005;Pyrgus malvae;0.986140979485564;  
AMTPC191-15;Lepidoptera;Erebia pharte;Erebia pharte;1;Erebia pharte;0.999999980780018;  
AMTPC192-15;Lepidoptera;Erebia pharte;Erebia pharte;1;Erebia pharte;0.999999991026073;  
AMTPC193-15;Lepidoptera;Coenonympha gardetta;NA;0.002;Coenonympha gardetta;0.76122108155261;  
AMTPC204-15;Lepidoptera;Aricia artaxerxes;NA;0.493;Aricia artaxerxes;0.999564449613157;  
AMTPC214-15;Lepidoptera;Erebia manto;Erebia manto;0.003;Erebia manto;0.999979531388322;  
AMTPC222-15;Lepidoptera;Cupido minimus;NA;0.013;Cupido minimus;0.998077282612956;  
AMTPC226-15;Lepidoptera;Cyaniris semiargus;NA;NA;Cyaniris semiargus;0.999101499375485;  
AMTPC227-15;Lepidoptera;Erebia oeme;NA;0.244;Erebia oeme;0.999999999877048;  
AMTPC228-15;Lepidoptera;Erebia meolans;Erebia meolans;NA;Erebia meolans;0.999872284309413;  
AMTPC229-15;Lepidoptera;Erebia oeme;NA;0.244;Erebia oeme;0.999999999877048;

AMTPC231-15;Lepidoptera;Lasiommata maera;Lasiommata maera;0.998;Lasiommata maera;0.999987703988518;  
AMTPC232-15;Lepidoptera;Lasiommata maera;Lasiommata maera;0.998;Lasiommata maera;0.999987703988518;  
AMTPC234-15;Lepidoptera;Melitaea diamina;NA;0.157;Melitaea diamina;0.999999981720549;  
AMTPC236-15;Lepidoptera;Melitaea diamina;NA;0.157;Melitaea diamina;0.999999981720549;  
AMTPC247-15;Lepidoptera;Erebia pronoe;Erebia pronoe;NA;Erebia pronoe;0.834226812415793;  
AMTPC261-15;Lepidoptera;Cupido minimus;NA;0.004;Cupido minimus;0.998215728074331;  
AMTPC263-15;Lepidoptera;Erebia oeme;NA;0.244;Erebia oeme;0.99999999877048;  
AMTPC265-15;Lepidoptera;Erebia tyndarus;NA;NA;NA;0.999999999999949;  
AMTPC300-15;Lepidoptera;Pieris napi;NA;0.013;Pieris napi;0.764655619178569;  
AMTPC302-15;Lepidoptera;Anthocharis cardamines;Anthocharis cardamines;1;Anthocharis cardamines;0.999999596425763;  
AMTPC304-15;Lepidoptera;Erebia manto;Erebia manto;0.003;Erebia manto;0.999979531388322;  
AMTPC305-15;Lepidoptera;Erebia manto;Erebia manto;0.003;Erebia manto;0.999979531388322;  
AMTPC333-15;Lepidoptera;Melitaea diamina;NA;0.16;Melitaea diamina;0.99999978877298;  
AMTPC365-15;Lepidoptera;Erebia eriphyle;Erebia eriphyle;1;Erebia eriphyle;0.99999974010791;  
AMTPC375-15;Lepidoptera;Erebia oeme;NA;0.244;Erebia oeme;0.99999999877048;  
AMTPC380-15;Lepidoptera;Erebia oeme;NA;0.244;Erebia oeme;0.99999999877048;  
AMTPC394-15;Lepidoptera;Aricia artaxerxes;NA;0.002;Aricia artaxerxes;0.992637870166738;  
AMTPC405-15;Lepidoptera;Melitaea diamina;NA;0.151;Melitaea diamina;0.99999994912021;  
AMTPC432-15;Lepidoptera;Boloria euphrosyne;Boloria euphrosyne;NA;Boloria euphrosyne;0.999637709581655;  
AMTPC433-15;Lepidoptera;Melitaea diamina;NA;0.176;Melitaea diamina;0.999999944597734;  
AMTPC434-15;Lepidoptera;Maculinea arion;NA;0.002;Phengaris arion;0.840187680703552;  
AMTPC449-15;Lepidoptera;Coenonympha pamphilus;Coenonympha pamphilus;1;Coenonympha pamphilus;0.999999999995225;  
AMTPC450-15;Lepidoptera;Cyaniris semiargus;NA;NA;Cyaniris semiargus;0.998918074728235;  
AMTPC451-15;Lepidoptera;Pyrgus malvae;Pyrgus malvae;0.006;Pyrgus malvae;0.991284437961241;  
AMTPC453-15;Lepidoptera;Maculinea arion;NA;0.001;Phengaris arion;0.875469653948688;  
AMTPC454-15;Lepidoptera;Callophrys rubi;NA;0.017;Callophrys rubi;0.98618411141067;  
AMTPC491-15;Lepidoptera;Erebia tyndarus;NA;0.001;Erebia tyndarus;0.758216264275257;  
ANBIO196-19;Lepidoptera;Vanessa atalanta;Vanessa atalanta;1;Vanessa atalanta;0.9999999993762;  
ANBIO330-19;Lepidoptera;Thymelicus sylvestris;NA;0.324;Thymelicus sylvestris;0.999940778442454;  
ATLAS002-22;Lepidoptera;Aglais urticae;NA;0.002;Aglais urticae;0.987497593219019;  
ATLAS003-22;Lepidoptera;Agriades glandon;NA;0.001;Agriades glandon;0.985149519522682;  
ATLAS004-22;Lepidoptera;Agriades glandon;NA;0.001;Agriades glandon;0.985149519522682;  
ATLAS007-22;Lepidoptera;Aphantopus hyperantus;Aphantopus hyperantus;0.004;Aphantopus hyperantus;0.999598909345147;  
ATLAS011-22;Lepidoptera;Aricia agestis;NA;0.253;Aricia agestis;0.996350017387504;  
ATLAS012-22;Lepidoptera;Aricia agestis;NA;0.001;Aricia artaxerxes;0.998546425606378;  
ATLAS013-22;Lepidoptera;Aricia agestis;NA;0.067;Aricia agestis;0.999509743227786;  
ATLAS014-22;Lepidoptera;Aricia artaxerxes;NA;0.001;Aricia artaxerxes;0.999429422213984;  
ATLAS015-22;Lepidoptera;Aricia cramera;Aricia cramera;1;Aricia cramera;0.999993731037033;  
ATLAS016-22;Lepidoptera;Aricia cramera;Aricia cramera;1;Aricia cramera;0.999993731037033;  
ATLAS018-22;Lepidoptera;Aricia cramera;Aricia cramera;1;Aricia cramera;0.999993731037033;  
ATLAS019-22;Lepidoptera;Aricia cramera;Aricia cramera;1;Aricia cramera;0.999993731037033;  
ATLAS020-22;Lepidoptera;Aricia cramera;Aricia cramera;1;Aricia cramera;0.999993731037033;  
ATLAS021-22;Lepidoptera;Aricia cramera;Aricia cramera;1;Aricia cramera;0.999993731037033;  
ATLAS022-22;Lepidoptera;Aricia cramera;Aricia cramera;1;Aricia cramera;0.999993731037033;  
ATLAS023-22;Lepidoptera;Aricia cramera;Aricia cramera;1;Aricia cramera;0.999993731037033;  
ATLAS024-22;Lepidoptera;Aricia cramera;Aricia cramera;1;Aricia cramera;0.999993731037033;  
ATLAS032-22;Lepidoptera;Boloria dia;Boloria dia;1;Boloria dia;0.99999999963421;  
ATLAS033-22;Lepidoptera;Boloria dia;Boloria dia;1;Boloria dia;0.99999999980503;  
ATLAS034-22;Lepidoptera;Boloria dia;Boloria dia;1;Boloria dia;0.99999999980503;  
ATLAS038-22;Lepidoptera;Boloria selene;NA;0.092;Boloria selene;0.99999957723188;  
ATLAS039-22;Lepidoptera;Brenthis daphne;Brenthis daphne;0.001;Brenthis daphne;0.994571844722107;  
ATLAS040-22;Lepidoptera;Brenthis daphne;NA;0.102;Brenthis daphne;0.717134521611551;  
ATLAS041-22;Lepidoptera;Brenthis daphne;Brenthis ino;0.007;Brenthis ino;0.977157381961834;  
ATLAS042-22;Lepidoptera;Brenthis hecate;NA;0.072;Brenthis hecate;0.999803056289114;  
ATLAS043-22;Lepidoptera;Brenthis hecate;NA;0.068;Brenthis hecate;0.999053551498733;  
ATLAS044-22;Lepidoptera;Brintesia circe;Brintesia circe;NA;Brintesia circe;0.999999706538049;  
ATLAS045-22;Lepidoptera;Brintesia circe;Brintesia circe;1;Brintesia circe;0.99999951254154;  
ATLAS051-22;Lepidoptera;Callophrys avis;Callophrys avis;1;Callophrys avis;0.992335035373355;  
ATLAS052-22;Lepidoptera;Callophrys avis;Callophrys avis;1;Callophrys avis;0.992335035373355;  
ATLAS053-22;Lepidoptera;Callophrys rubi;NA;0.02;Callophrys rubi;0.999082687464383;  
ATLAS055-22;Lepidoptera;Carcharodus alceae;Carcharodus alceae;1;Carcharodus alceae;0.999999998465938;  
ATLAS056-22;Lepidoptera;Carcharodus alceae;Carcharodus alceae;NA;Carcharodus alceae;0.999999984059485;  
ATLAS057-22;Lepidoptera;Carcharodus alceae;Carcharodus alceae;0.999;Carcharodus alceae;0.999999996339511;  
ATLAS060-22;Lepidoptera;Carterocephalus palaemon;NA;0.052;Carterocephalus palaemon;0.728445051795325;  
ATLAS061-22;Lepidoptera;Carterocephalus palaemon;NA;0.052;Carterocephalus palaemon;0.728445051795325;  
ATLAS062-22;Lepidoptera;Carterocephalus palaemon;NA;0.052;Carterocephalus palaemon;0.728445051795325;

ATLAS065-22;Lepidoptera;Celastrina argiolus;Celastrina argiolus;1;Celastrina argiolus;0.999527385150531;  
ATLAS066-22;Lepidoptera;Celastrina argiolus;Celastrina argiolus;1;Celastrina argiolus;0.999527385150531;  
ATLAS067-22;Lepidoptera;Charaxes jasius;Charaxes jasius;NA;Charaxes jasius;0.988941612024336;  
ATLAS068-22;Lepidoptera;Charaxes jasius;Charaxes jasius;NA;Charaxes jasius;0.990397821479112;  
ATLAS069-22;Lepidoptera;Charaxes jasius;Charaxes jasius;NA;Charaxes jasius;0.982882460966838;  
ATLAS071-22;Lepidoptera;Charaxes jasius;Charaxes jasius;NA;Charaxes jasius;0.995860724722804;  
ATLAS072-22;Lepidoptera;Charaxes jasius;Charaxes jasius;NA;Charaxes jasius;0.949854280059292;  
ATLAS073-22;Lepidoptera;Charaxes jasius;Charaxes jasius;NA;Charaxes jasius;0.995860724722804;  
ATLAS085-22;Lepidoptera;Coenonympha arcania;NA;0.172;Coenonympha arcania;0.963036309473038;  
ATLAS086-22;Lepidoptera;Coenonympha arcania;NA;0.273;Coenonympha arcania;0.948490192015929;  
ATLAS089-22;Lepidoptera;Coenonympha pamphilus;Coenonympha pamphilus;1;Coenonympha pamphilus;0.999999999999744;  
ATLAS092-22;Lepidoptera;Colias alfacariensis;Erynnis tages;1;Erynnis tages;0.999999281987018;  
ATLAS093-22;Lepidoptera;Colias alfacariensis;Colias alfacariensis;1;Colias alfacariensis;0.999894613238469;  
ATLAS094-22;Lepidoptera;Colias alfacariensis;Colias alfacariensis;0.001;Colias alfacariensis;0.999926026317526;  
ATLAS095-22;Lepidoptera;Colias alfacariensis;Colias alfacariensis;0.001;Colias alfacariensis;0.999926026317526;  
ATLAS096-22;Lepidoptera;Colias alfacariensis;Colias alfacariensis;0.001;Colias alfacariensis;0.999926026317526;  
ATLAS097-22;Lepidoptera;Colias alfacariensis;Colias alfacariensis;0.001;Colias alfacariensis;0.999926026317526;  
ATLAS098-22;Lepidoptera;Colias alfacariensis;Colias alfacariensis;0.001;Colias alfacariensis;0.999926026317526;  
ATLAS099-22;Lepidoptera;Colias alfacariensis;Colias alfacariensis;0.001;Colias alfacariensis;0.999926026317526;  
ATLAS100-22;Lepidoptera;Colias alfacariensis;Colias alfacariensis;0.001;Colias alfacariensis;0.999926026317526;  
ATLAS101-22;Lepidoptera;Colias alfacariensis;Colias alfacariensis;0.001;Colias alfacariensis;0.999926026317526;  
ATLAS102-22;Lepidoptera;Colias alfacariensis;Colias alfacariensis;0.001;Colias alfacariensis;0.999926026317526;  
ATLAS103-22;Lepidoptera;Colias alfacariensis;Colias alfacariensis;0.001;Colias alfacariensis;0.999926026317526;  
ATLAS104-22;Lepidoptera;Colias alfacariensis;Colias alfacariensis;0.001;Colias alfacariensis;0.999926026317526;  
ATLAS105-22;Lepidoptera;Colias alfacariensis;Colias alfacariensis;0.001;Colias alfacariensis;0.999926026317526;  
ATLAS106-22;Lepidoptera;Colias alfacariensis;Colias alfacariensis;0.001;Colias alfacariensis;0.999926026317526;  
ATLAS107-22;Lepidoptera;Colias alfacariensis;Colias alfacariensis;0.001;Colias alfacariensis;0.999926026317526;  
ATLAS108-22;Lepidoptera;Colias alfacariensis;Colias alfacariensis;1;Colias alfacariensis;0.999986994131001;  
ATLAS109-22;Lepidoptera;Colias alfacariensis;Colias alfacariensis;0.001;Colias alfacariensis;0.999857790810452;  
ATLAS110-22;Lepidoptera;Colias alfacariensis;Colias alfacariensis;0.001;Colias alfacariensis;0.999857790810452;  
ATLAS111-22;Lepidoptera;Colias alfacariensis;Colias alfacariensis;0.001;Colias alfacariensis;0.999926026317526;  
ATLAS113-22;Lepidoptera;Colias crocea;NA;0.059;NA;0.999999999999738;  
ATLAS118-22;Lepidoptera;Colias crocea;NA;0.059;NA;0.999999999999738;  
ATLAS119-22;Lepidoptera;Colias crocea;NA;0.059;NA;0.999999999999738;  
ATLAS120-22;Lepidoptera;Colias crocea;NA;NA;NA;0.999999999999751;  
ATLAS121-22;Lepidoptera;Colias crocea;NA;NA;NA;0.999999999999751;  
ATLAS122-22;Lepidoptera;Colias crocea;NA;NA;NA;0.999999999999751;  
ATLAS123-22;Lepidoptera;Colias crocea;NA;NA;NA;0.999999999999751;  
ATLAS124-22;Lepidoptera;Colias crocea;NA;NA;NA;0.999999999999751;  
ATLAS125-22;Lepidoptera;Colias crocea;NA;NA;NA;0.999999999999715;  
ATLAS126-22;Lepidoptera;Colias crocea;NA;NA;NA;0.999999999999751;  
ATLAS127-22;Lepidoptera;Colias crocea;NA;NA;NA;0.999999999999741;  
ATLAS128-22;Lepidoptera;Colias crocea;NA;NA;NA;0.999999999999334;  
ATLAS129-22;Lepidoptera;Colias crocea;NA;NA;NA;0.999999999999707;  
ATLAS130-22;Lepidoptera;Colias crocea;NA;NA;NA;0.999999999999751;  
ATLAS131-22;Lepidoptera;Colias crocea;NA;NA;NA;0.999999999999751;  
ATLAS132-22;Lepidoptera;Colias crocea;NA;NA;NA;0.99999999999975;  
ATLAS133-22;Lepidoptera;Colias crocea;NA;NA;NA;0.99999999999975;  
ATLAS134-22;Lepidoptera;Colias crocea;NA;NA;NA;0.999999999999751;  
ATLAS135-22;Lepidoptera;Colias crocea;NA;NA;NA;0.9999999999998337;  
ATLAS136-22;Lepidoptera;Colias crocea;NA;NA;NA;0.999999999999751;  
ATLAS137-22;Lepidoptera;Colias crocea;NA;NA;NA;0.999999999999751;  
ATLAS138-22;Lepidoptera;Colias crocea;NA;NA;NA;0.999999999999751;  
ATLAS139-22;Lepidoptera;Colias crocea;NA;NA;NA;0.999999999999751;  
ATLAS140-22;Lepidoptera;Colias crocea;NA;NA;NA;0.999999999999751;  
ATLAS141-22;Lepidoptera;Colias crocea;NA;NA;NA;0.999999999999751;



ATLAS142-22;Lepidoptera;Colias crocea;NA;0.059;NA;0.99999999999738;  
ATLAS143-22;Lepidoptera;Colias crocea;NA;0.059;NA;0.99999999999738;  
ATLAS144-22;Lepidoptera;Colias crocea;NA;0.059;NA;0.99999999999738;  
ATLAS145-22;Lepidoptera;Colias crocea;NA;0.059;NA;0.99999999999738;  
ATLAS146-22;Lepidoptera;Colias crocea;NA;0.059;NA;0.99999999999738;  
ATLAS147-22;Lepidoptera;Colias crocea;NA;0.059;NA;0.99999999999738;  
ATLAS148-22;Lepidoptera;Colias hyale;Colias hyale;0.015;Colias hyale;0.999997884296128;  
ATLAS149-22;Lepidoptera;Colias hyale;Colias hyale;0.015;Colias hyale;0.999997884296128;  
ATLAS150-22;Lepidoptera;Colias hyale;Colias hyale;0.015;Colias hyale;0.999997884296128;  
ATLAS151-22;Lepidoptera;Colias hyale;Colias hyale;0.015;Colias hyale;0.999997884296128;  
ATLAS152-22;Lepidoptera;Colias hyale;Colias hyale;0.015;Colias hyale;0.999997884296128;  
ATLAS153-22;Lepidoptera;Colias hyale;Colias hyale;0.016;Colias hyale;0.999997994514011;  
ATLAS154-22;Lepidoptera;Colias hyale;Colias hyale;0.015;Colias hyale;0.999997923550718;  
ATLAS155-22;Lepidoptera;Cupido alcetas;NA;0.068;Cupido alcetas;0.88988907876118;  
ATLAS157-22;Lepidoptera;Cupido argiades;NA;0.499;NA;0.9999999999984682;  
ATLAS160-22;Lepidoptera;Cupido minimus;NA;0.001;Cupido minimus;0.99992423685743;  
ATLAS161-22;Lepidoptera;Cupido osiris;Cupido osiris;1;Cupido osiris;0.999999351858474;  
ATLAS162-22;Lepidoptera;Cyaniris semiargus;NA;NA;NA;0.999998909142239;  
ATLAS168-22;Lepidoptera;Erebia epiphron;NA;NA;Erebia epiphron;0.950006471153786;  
ATLAS169-22;Lepidoptera;Erebia epiphron;NA;NA;Erebia epiphron;0.950006471153786;  
ATLAS170-22;Lepidoptera;Erebia epiphron;NA;NA;Erebia epiphron;0.950006471153786;  
ATLAS173-22;Lepidoptera;Erebia euryale;NA;NA;Erebia euryale;0.935077349534533;  
ATLAS183-22;Lepidoptera;Erebia meolans;Erebia meolans;NA;Erebia meolans;0.99976373317804;  
ATLAS184-22;Lepidoptera;Erebia meolans;Erebia meolans;NA;Erebia meolans;0.999835953426128;  
ATLAS185-22;Lepidoptera;Erebia neoridas;NA;NA;Erebia neoridas;0.997677227800323;  
ATLAS187-22;Lepidoptera;Erynnis tages;Erynnis tages;1;Erynnis tages;0.999999281987018;  
ATLAS227-22;Lepidoptera;Euphydryas aurinia;Euphydryas aurinia;0.016;Euphydryas  
aurinia;0.997751503369639;  
ATLAS228-22;Lepidoptera;Euphydryas aurinia;Euphydryas aurinia;0.016;Euphydryas  
aurinia;0.997751503369639;  
ATLAS232-22;Lepidoptera;Gegenes nostrodamus;Gegenes nostrodamus;1;Gegenes  
nostrodamus;0.99999997215411;  
ATLAS233-22;Lepidoptera;Gegenes nostrodamus;Gegenes nostrodamus;1;Gegenes  
nostrodamus;0.99999996883645;  
ATLAS234-22;Lepidoptera;Gegenes nostrodamus;Gegenes nostrodamus;1;Gegenes  
nostrodamus;0.99999996883645;  
ATLAS235-22;Lepidoptera;Gegenes nostrodamus;Gegenes nostrodamus;1;Gegenes  
nostrodamus;0.99999996883645;  
ATLAS236-22;Lepidoptera;Gegenes nostrodamus;Gegenes nostrodamus;1;Gegenes  
nostrodamus;0.99999996883645;  
ATLAS237-22;Lepidoptera;Gegenes nostrodamus;Gegenes nostrodamus;1;Gegenes  
nostrodamus;0.99999996883645;  
ATLAS256-22;Lepidoptera;Gonepteryx rhamni;NA;0.474;Gonepteryx rhamni;0.982076396127858;  
ATLAS257-22;Lepidoptera;Hipparchia aristaeus;NA;0.001;Hipparchia semele;0.86935938851355;  
ATLAS296-22;Lepidoptera;Iolana iolas;NA;NA;Iolana iolas;0.97259403345821;  
ATLAS297-22;Lepidoptera;Iolana iolas;NA;NA;Iolana iolas;0.998335020541118;  
ATLAS299-22;Lepidoptera;Issoria lathonia;Issoria lathonia;1;Issoria lathonia;0.99999999989257;  
ATLAS300-22;Lepidoptera;Issoria lathonia;Issoria lathonia;1;Issoria lathonia;0.99999999989257;  
ATLAS303-22;Lepidoptera;Lampides boeticus;Lampides boeticus;1;Lampides  
boeticus;0.99999999545906;  
ATLAS304-22;Lepidoptera;Lampides boeticus;Lampides boeticus;1;Lampides  
boeticus;0.99999999545906;  
ATLAS305-22;Lepidoptera;Lampides boeticus;Lampides boeticus;1;Lampides  
boeticus;0.9999999876789;  
ATLAS308-22;Lepidoptera;Lampides boeticus;Lampides boeticus;1;Lampides  
boeticus;0.99999999545906;  
ATLAS309-22;Lepidoptera;Lampides boeticus;Lampides boeticus;1;Lampides  
boeticus;0.99999999691909;  
ATLAS310-22;Lepidoptera;Lampides boeticus;Lampides boeticus;1;Lampides  
boeticus;0.99999999699043;  
ATLAS311-22;Lepidoptera;Lampides boeticus;Lampides boeticus;1;Lampides  
boeticus;0.999999939889337;  
ATLAS312-22;Lepidoptera;Lampides boeticus;Lampides boeticus;1;Lampides  
boeticus;0.99999999691909;  
ATLAS313-22;Lepidoptera;Lampides boeticus;Lampides boeticus;1;Lampides  
boeticus;0.99999999545906;  
ATLAS314-22;Lepidoptera;Lampides boeticus;Lampides boeticus;1;Lampides  
boeticus;0.99999999545906;  
ATLAS315-22;Lepidoptera;Lampides boeticus;Lampides boeticus;1;Lampides  
boeticus;0.99999999545906;  
ATLAS316-22;Lepidoptera;Lampides boeticus;Lampides boeticus;1;Lampides  
boeticus;0.99999999545906;  
ATLAS317-22;Lepidoptera;Lampides boeticus;Lampides boeticus;1;Lampides  
boeticus;0.99999999545906;  
ATLAS318-22;Lepidoptera;Lampides boeticus;Lampides boeticus;1;Lampides  
boeticus;0.99999999690317;  
ATLAS319-22;Lepidoptera;Lampides boeticus;Lampides boeticus;1;Lampides  
boeticus;0.9999999872125;

ATLAS320-22;Lepidoptera;Lasiommata maera;Lasiommata maera;1;Lasiommata maera;0.999997945450226;  
ATLAS321-22;Lepidoptera;Lasiommata megera;Lasiommata megera;1;Lasiommata  
megera;0.999928528239676;  
ATLAS322-22;Lepidoptera;Lasiommata megera;Lasiommata megera;1;Lasiommata  
megera;0.999928528239676;  
ATLAS392-22;Lepidoptera;Lycaena alciphron;Lycaena alciphron;1;Lycaena  
alciphron;0.99999738488788;  
ATLAS393-22;Lepidoptera;Lycaena hippothoe;NA;NA;Lycaena hippothoe;0.928973453460131;  
ATLAS394-22;Lepidoptera;Lycaena phlaeas;Lycaena phlaeas;1;Lycaena phlaeas;0.99999996363186;  
ATLAS397-22;Lepidoptera;Lycaena phlaeas;Lycaena phlaeas;1;Lycaena phlaeas;0.99999996363186;  
ATLAS403-22;Lepidoptera;Maniola jurtina;NA;0.038;NA;0.99999999999524;  
ATLAS404-22;Lepidoptera;Maniola jurtina;NA;0.001;Maniola jurtina;0.939220105860875;  
ATLAS405-22;Lepidoptera;Maniola jurtina;NA;NA;Maniola jurtina;0.969611756132048;  
ATLAS406-22;Lepidoptera;Maniola jurtina;NA;0.001;Maniola jurtina;0.939220105860875;  
ATLAS407-22;Lepidoptera;Maniola jurtina;NA;0.001;Maniola jurtina;0.939220105860875;  
ATLAS408-22;Lepidoptera;Maniola jurtina;NA;NA;Maniola jurtina;0.982233585563106;  
ATLAS409-22;Lepidoptera;Maniola jurtina;NA;0.001;Maniola jurtina;0.939220105860875;  
ATLAS411-22;Lepidoptera;Maniola jurtina;NA;0.001;Maniola jurtina;0.939220105860875;  
ATLAS412-22;Lepidoptera;Maniola jurtina;NA;0.001;Maniola jurtina;0.939220105860875;  
ATLAS442-22;Lepidoptera;Melitaea deione;Melitaea deione;1;Melitaea deione;0.99997357311937;  
ATLAS443-22;Lepidoptera;Melitaea deione;Melitaea deione;1;Melitaea deione;0.99998609499699;  
ATLAS444-22;Lepidoptera;Melitaea deione;Melitaea deione;1;Melitaea deione;0.99999066084409;  
ATLAS445-22;Lepidoptera;Melitaea deione;Melitaea deione;1;Melitaea deione;0.9999999302304;  
ATLAS446-22;Lepidoptera;Melitaea deione;Melitaea deione;1;Melitaea deione;0.99999998407247;  
ATLAS447-22;Lepidoptera;Melitaea deione;Melitaea deione;1;Melitaea deione;0.99999990313768;  
ATLAS448-22;Lepidoptera;Melitaea diamina;NA;0.149;Melitaea diamina;0.99999996592464;  
ATLAS449-22;Lepidoptera;Melitaea diamina;Melitaea diamina;0.002;Melitaea  
diamina;0.99999850355675;  
ATLAS450-22;Lepidoptera;Melitaea diamina;NA;0.066;Melitaea diamina;0.99999985294579;  
ATLAS451-22;Lepidoptera;Melitaea diamina;NA;0.066;Melitaea diamina;0.99999985294579;  
ATLAS452-22;Lepidoptera;Melitaea didyma;Melitaea didyma;0.995;Melitaea didyma;0.994792486381848;  
ATLAS461-22;Lepidoptera;Melitaea didyma;Melitaea didyma;1;Melitaea didyma;0.996366765827355;  
ATLAS466-22;Lepidoptera;Melitaea parthenoides;Melitaea parthenoides;1;Melitaea  
parthenoides;0.99999968152765;  
ATLAS467-22;Lepidoptera;Melitaea parthenoides;Melitaea parthenoides;1;Melitaea  
parthenoides;0.99999993715846;  
ATLAS468-22;Lepidoptera;Melitaea parthenoides;Melitaea parthenoides;1;Melitaea  
parthenoides;0.99999969741709;  
ATLAS469-22;Lepidoptera;Melitaea parthenoides;Melitaea parthenoides;1;Melitaea  
parthenoides;0.99998278417568;  
ATLAS470-22;Lepidoptera;Melitaea parthenoides;Melitaea parthenoides;1;Melitaea  
parthenoides;0.99999984713213;  
ATLAS471-22;Lepidoptera;Melitaea parthenoides;Melitaea parthenoides;1;Melitaea  
parthenoides;0.99999995982648;  
ATLAS472-22;Lepidoptera;Melitaea parthenoides;Melitaea parthenoides;1;Melitaea  
parthenoides;0.99999995457472;  
ATLAS473-22;Lepidoptera;Melitaea parthenoides;Melitaea parthenoides;1;Melitaea  
parthenoides;0.99999980399821;  
ATLAS474-22;Lepidoptera;Melitaea parthenoides;Melitaea parthenoides;1;Melitaea  
parthenoides;0.999998904055136;  
ATLAS475-22;Lepidoptera;Melitaea parthenoides;Melitaea parthenoides;1;Melitaea  
parthenoides;0.99999993530452;  
ATLAS483-22;Lepidoptera;Minois dryas;NA;0.025;Minois dryas;0.850746026247397;  
ATLAS503-22;Lepidoptera;Ochlodes sylvanus;NA;NA;Ochlodes sylvanus;0.996982382831402;  
ATLAS512-22;Lepidoptera;Pararge aegeria;Pararge aegeria;1;Pararge aegeria;0.99999999963165;  
ATLAS513-22;Lepidoptera;Pararge aegeria;Pararge aegeria;1;Pararge aegeria;0.99999999963165;  
ATLAS514-22;Lepidoptera;Pararge aegeria;Pararge aegeria;1;Pararge aegeria;0.99999999963165;  
ATLAS528-22;Lepidoptera;Parnassius mnemosyne;Parnassius mnemosyne;1;Parnassius  
mnemosyne;0.99999269897625;  
ATLAS570-22;Lepidoptera;Polygonia c-album;NA;0.215;NA;0.999999192918557;  
ATLAS572-22;Lepidoptera;Polygonia egea;Polygonia egea;1;Polygonia egea;0.99999758078475;  
ATLAS577-22;Lepidoptera;Polyommatus celina;NA;0.304;Polyommatus celina;0.99999999853685;  
ATLAS578-22;Lepidoptera;Polyommatus celina;NA;0.004;Polyommatus celina;0.99999999587999;  
ATLAS579-22;Lepidoptera;Polyommatus celina;NA;0.003;Polyommatus celina;0.9999999914678;  
ATLAS580-22;Lepidoptera;Polyommatus celina;Polyommatus celina;0.009;Polyommatus  
celina;0.99999999949694;  
ATLAS581-22;Lepidoptera;Polyommatus celina;NA;0.072;Polyommatus celina;0.99999999953559;  
ATLAS582-22;Lepidoptera;Polyommatus celina;NA;0.072;Polyommatus celina;0.99999999953559;  
ATLAS583-22;Lepidoptera;Polyommatus celina;Polyommatus celina;0.009;Polyommatus  
celina;0.99999999949694;  
ATLAS584-22;Lepidoptera;Polyommatus celina;Polyommatus celina;0.04;Polyommatus  
celina;0.99999999133223;  
ATLAS585-22;Lepidoptera;Polyommatus celina;Polyommatus celina;0.04;Polyommatus  
celina;0.999999999590585;  
ATLAS588-22;Lepidoptera;Polyommatus celina;NA;0.072;Polyommatus celina;0.99999999953559;  
ATLAS589-22;Lepidoptera;Polyommatus celina;NA;0.004;Polyommatus celina;0.99999999587999;  
ATLAS590-22;Lepidoptera;Polyommatus celina;NA;0.072;Polyommatus celina;0.99999999953559;

ATLAS591-22;Lepidoptera;Polyommatus damon;Polyommatus damon;1;Polyommatus damon;0.99999933777959;  
ATLAS592-22;Lepidoptera;Polyommatus damon;Polyommatus damon;1;Polyommatus damon;0.99999887832281;  
ATLAS593-22;Lepidoptera;Polyommatus damon;Polyommatus damon;1;Polyommatus damon;0.99998403245054;  
ATLAS594-22;Lepidoptera;Polyommatus dolus;Polyommatus dolus;0.002;Polyommatus dolus;0.974976778379616;  
ATLAS595-22;Lepidoptera;Polyommatus dorylas;Polyommatus dorylas;0.005;Polyommatus dorylas;0.987518562410738;  
ATLAS596-22;Lepidoptera;Polyommatus dorylas;Polyommatus dorylas;0.01;Polyommatus dorylas;0.986535405601042;  
ATLAS597-22;Lepidoptera;Polyommatus eros;NA;0.005;Polyommatus eros;0.975783510541378;  
ATLAS598-22;Lepidoptera;Polyommatus eros;NA;0.005;Polyommatus eros;0.975783510541378;  
ATLAS599-22;Lepidoptera;Polyommatus eros;NA;0.001;Polyommatus eros;0.975240035293052;  
ATLAS600-22;Lepidoptera;Polyommatus eros;NA;NA;Polyommatus eros;0.865495727112908;  
ATLAS601-22;Lepidoptera;Polyommatus escheri;Polyommatus escheri;1;Polyommatus escheri;0.99999989429227;  
ATLAS608-22;Lepidoptera;Polyommatus icarus;NA;0.004;Polyommatus icarus;0.999481683747521;  
ATLAS610-22;Lepidoptera;Polyommatus icarus;Polyommatus icarus;0.001;Polyommatus icarus;0.999851522482238;  
ATLAS611-22;Lepidoptera;Polyommatus icarus;NA;0.009;Polyommatus icarus;0.99934079538001;  
ATLAS612-22;Lepidoptera;Polyommatus icarus;Polyommatus icarus;0.001;Polyommatus icarus;0.999851522482238;  
ATLAS613-22;Lepidoptera;Polyommatus icarus;NA;0.001;Polyommatus icarus;0.971665478142064;  
ATLAS614-22;Lepidoptera;Polyommatus icarus;Polyommatus icarus;0.001;Polyommatus icarus;0.999851522482238;  
ATLAS615-22;Lepidoptera;Polyommatus icarus;NA;0.004;Polyommatus icarus;0.999481683747521;  
ATLAS616-22;Lepidoptera;Polyommatus icarus;Polyommatus icarus;0.001;Polyommatus icarus;0.999851522482238;  
ATLAS617-22;Lepidoptera;Polyommatus icarus;NA;0.001;Polyommatus icarus;0.971665478142064;  
ATLAS618-22;Lepidoptera;Polyommatus icarus;Polyommatus icarus;0.003;Polyommatus icarus;0.999808014773309;  
ATLAS619-22;Lepidoptera;Polyommatus icarus;NA;0.004;Polyommatus icarus;0.999481683747521;  
ATLAS620-22;Lepidoptera;Polyommatus icarus;Polyommatus icarus;0.001;Polyommatus icarus;0.999848859399272;  
ATLAS632-22;Lepidoptera;Polyommatus thersites;Polyommatus thersites;0.999;Polyommatus thersites;0.999999916395897;  
ATLAS633-22;Lepidoptera;Polyommatus thersites;Polyommatus thersites;0.001;Polyommatus thersites;0.99999962890986;  
ATLAS635-22;Lepidoptera;Pontia callidice;Pontia callidice;1;Pontia callidice;0.99999998637406;  
ATLAS690-22;Lepidoptera;Pyrgus alveus;NA;NA;Pyrgus alveus;0.931326683565012;  
ATLAS691-22;Lepidoptera;Pyrgus alveus;NA;NA;Pyrgus alveus;0.927306391770666;  
ATLAS692-22;Lepidoptera;Pyrgus alveus;NA;NA;Pyrgus alveus;0.917812816884131;  
ATLAS693-22;Lepidoptera;Pyrgus alveus;NA;NA;Pyrgus alveus;0.931326683565012;  
ATLAS694-22;Lepidoptera;Pyrgus alveus;NA;NA;Pyrgus alveus;0.902591602214502;  
ATLAS695-22;Lepidoptera;Pyrgus andromedae;NA;0.001;Pyrgus andromedae;0.975733909551987;  
ATLAS696-22;Lepidoptera;Pyrgus andromedae;Pyrgus andromedae;1;Pyrgus andromedae;0.993824993204341;  
ATLAS697-22;Lepidoptera;Pyrgus armoricanus;Pyrgus armoricanus;1;Pyrgus armoricanus;0.998895076657973;  
ATLAS698-22;Lepidoptera;Pyrgus armoricanus;Pyrgus armoricanus;1;Pyrgus armoricanus;0.999997353848817;  
ATLAS699-22;Lepidoptera;Pyrgus armoricanus;Pyrgus armoricanus;1;Pyrgus armoricanus;0.997478680096412;  
ATLAS700-22;Lepidoptera;Pyrgus armoricanus;Pyrgus armoricanus;1;Pyrgus armoricanus;0.997478680096412;  
ATLAS701-22;Lepidoptera;Pyrgus armoricanus;Pyrgus armoricanus;1;Pyrgus armoricanus;0.997478680096412;  
ATLAS702-22;Lepidoptera;Pyrgus armoricanus;Pyrgus armoricanus;1;Pyrgus armoricanus;0.997478680096412;  
ATLAS703-22;Lepidoptera;Pyrgus armoricanus;Pyrgus armoricanus;1;Pyrgus armoricanus;0.999989012351076;  
ATLAS704-22;Lepidoptera;Pyrgus armoricanus;Pyrgus armoricanus;1;Pyrgus armoricanus;0.999997353848817;  
ATLAS705-22;Lepidoptera;Pyrgus armoricanus;Pyrgus armoricanus;1;Pyrgus armoricanus;0.999997353848817;  
ATLAS706-22;Lepidoptera;Pyrgus armoricanus;Pyrgus armoricanus;1;Pyrgus armoricanus;0.999997353848817;  
ATLAS707-22;Lepidoptera;Pyrgus armoricanus;Pyrgus armoricanus;1;Pyrgus armoricanus;0.999997353848817;  
ATLAS710-22;Lepidoptera;Pyrgus malvae;Pyrgus malvae;0.999;Pyrgus malvae;0.993531783407179;  
ATLAS711-22;Lepidoptera;Pyrgus malvae;Pyrgus malvae;NA;Pyrgus malvae;0.980121140374433;  
ATLAS712-22;Lepidoptera;Pyrgus malvae;Pyrgus malvae;NA;Pyrgus malvae;0.980121140374433;  
ATLAS713-22;Lepidoptera;Pyrgus malvae;Pyrgus malvae;NA;Pyrgus malvae;0.979843680166459;  
ATLAS714-22;Lepidoptera;Pyrgus malvoides;NA;0.076;Pyrgus malvoides;0.887854315566122;  
ATLAS715-22;Lepidoptera;Pyrgus malvoides;NA;0.076;Pyrgus malvoides;0.887854315566122;  
ATLAS716-22;Lepidoptera;Pyrgus malvoides;NA;0.076;Pyrgus malvoides;0.887854315566122;

ATLAS717-22;Lepidoptera;Pyrgus malvoides;NA;0.176;Pyrgus malvoides;0.940490890379026;  
ATLAS718-22;Lepidoptera;Pyrgus malvoides;NA;0.111;Pyrgus malvoides;0.968399374774442;  
ATLAS719-22;Lepidoptera;Pyrgus malvoides;NA;0.001;Pyrgus malvoides;0.864662411153201;  
ATLAS720-22;Lepidoptera;Pyrgus malvoides;NA;0.076;Pyrgus malvoides;0.887854315566122;  
ATLAS721-22;Lepidoptera;Pyrgus malvoides;NA;0.076;Pyrgus malvoides;0.887854315566122;  
ATLAS722-22;Lepidoptera;Pyrgus malvoides;NA;0.041;Pyrgus malvoides;0.932850168236208;  
ATLAS723-22;Lepidoptera;Pyrgus onopordi;Pyrgus onopordi;1;Pyrgus onopordi;0.999994513194469;  
ATLAS724-22;Lepidoptera;Pyrgus onopordi;Pyrgus onopordi;1;Pyrgus onopordi;0.999997111229755;  
ATLAS730-22;Lepidoptera;Pyronia cecilia;Pyronia cecilia;NA;Pyronia cecilia;1;  
ATLAS732-22;Lepidoptera;Pyronia tithonus;Pyronia tithonus;1;Pyronia tithonus;1;  
ATLAS733-22;Lepidoptera;Satyrium esculi;Satyrium esculi;1;Satyrium esculi;0.99999957367948;  
ATLAS734-22;Lepidoptera;Satyrium pruni;NA;0.076;Satyrium pruni;0.990322364021655;  
ATLAS735-22;Lepidoptera;Satyrium spini;Satyrium spini;1;Satyrium spini;0.999998560564576;  
ATLAS736-22;Lepidoptera;Satyrium spini;Satyrium spini;1;Satyrium spini;0.999999721054916;  
ATLAS737-22;Lepidoptera;Satyrus ferula;Satyrus ferula;0.001;Satyrus ferula;0.989623920673219;  
ATLAS738-22;Lepidoptera;Argynnis aglaja;NA;0.001;NA;0.999999999999586;  
ATLAS739-22;Lepidoptera;Argynnis aglaja;NA;NA;NA;0.99999999998051;  
ATLAS741-22;Lepidoptera;Spialia sertorius;Spialia sertorius;1;Spialia sertorius;0.9999994250456;  
ATLAS744-22;Lepidoptera;Spialia sertorius;Spialia sertorius;1;Spialia sertorius;0.99999932771518;  
ATLAS745-22;Lepidoptera;Spialia sertorius;Spialia sertorius;1;Spialia sertorius;0.9999994250456;  
ATLAS753-22;Lepidoptera;Spialia sertorius;Spialia sertorius;1;Spialia sertorius;0.99999957643241;  
ATLAS755-22;Lepidoptera;Spialia sertorius;Spialia sertorius;1;Spialia sertorius;0.99999975508246;  
ATLAS756-22;Lepidoptera;Spialia sertorius;Spialia sertorius;1;Spialia sertorius;0.99999926892772;  
ATLAS759-22;Lepidoptera;Spialia sertorius;Spialia sertorius;1;Spialia sertorius;0.99999957643241;  
ATLAS763-22;Lepidoptera;Spialia sertorius;Spialia sertorius;1;Spialia sertorius;0.99999932771518;  
ATLAS766-22;Lepidoptera;Thecla betulae;Thecla betulae;1;Thecla betulae;0.99999999972886;  
ATLAS768-22;Lepidoptera;Thymelicus acteon;Thymelicus acteon;1;Thymelicus acteon;0.99999962833841;  
ATLAS769-22;Lepidoptera;Thymelicus acteon;Thymelicus acteon;1;Thymelicus acteon;0.99999976833664;  
ATLAS779-22;Lepidoptera;Thymelicus lineola;Thymelicus lineola;0.002;Thymelicus lineola;0.999992153884563;  
ATLAS780-22;Lepidoptera;Thymelicus sylvestris;Thymelicus sylvestris;1;Thymelicus sylvestris;0.99999985935205;  
ATLAS789-22;Lepidoptera;Vanessa atalanta;Vanessa atalanta;1;Vanessa atalanta;0.999999999757762;  
ATLAS791-22;Lepidoptera;Vanessa atalanta;Vanessa atalanta;1;Vanessa atalanta;0.999999999669399;  
ATLAS792-22;Lepidoptera;Vanessa atalanta;Vanessa atalanta;1;Vanessa atalanta;0.999999999793403;  
ATLAS793-22;Lepidoptera;Vanessa atalanta;Vanessa atalanta;1;Vanessa atalanta;0.999999999725759;  
ATLAS794-22;Lepidoptera;Vanessa atalanta;Vanessa atalanta;1;Vanessa atalanta;0.999999999793403;  
ATLAS795-22;Lepidoptera;Vanessa atalanta;Vanessa atalanta;1;Vanessa atalanta;0.999999999381544;  
ATLAS796-22;Lepidoptera;Vanessa atalanta;Vanessa atalanta;1;Vanessa atalanta;0.999999999790589;  
ATLAS797-22;Lepidoptera;Vanessa atalanta;Vanessa atalanta;1;Vanessa atalanta;0.9999999996750603;  
ATLAS798-22;Lepidoptera;Vanessa cardui;Vanessa cardui;1;Vanessa cardui;0.999999459983318;  
ATLAS799-22;Lepidoptera;Vanessa cardui;Vanessa cardui;1;Vanessa cardui;0.999999116402754;  
ATLAS800-22;Lepidoptera;Vanessa cardui;Vanessa cardui;1;Vanessa cardui;0.99999803450484;  
ATLAS805-22;Lepidoptera;Vanessa cardui;Vanessa cardui;1;Vanessa cardui;0.999999459983318;  
ATLAS806-22;Lepidoptera;Vanessa cardui;Vanessa cardui;1;Vanessa cardui;0.99999803450484;  
ATLAS808-22;Lepidoptera;Vanessa cardui;Vanessa cardui;1;Vanessa cardui;0.999999427581593;  
AY346221;Lepidoptera;Erebia euryale;NA;NA;NA;0.871436907054897;  
AY346223;Lepidoptera;Erebia meolans;Erebia meolans;NA;NA;0.822853759048436;  
AY346225;Lepidoptera;Erebia epiphron;NA;NA;NA;0.898369892379513;  
AY346226;Lepidoptera;Erebia pandrose;NA;0.045;NA;0.870510983426716;  
AY346227;Lepidoptera;Erebia oeme;Erebia oeme;0.003;NA;0.841979908687587;  
AY346230;Lepidoptera;Coenonympha arcania;Coenonympha arcania;0.004;NA;0.863693349039585;  
AY346231;Lepidoptera;Coenonympha glycerion;Coenonympha glycerion;1;NA;0.836719866219981;  
AY346232;Lepidoptera;Coenonympha pamphilus;Coenonympha pamphilus;1;NA;0.83509472629056;  
AY346233;Lepidoptera;Maniola jurtina;NA;0.009;Maniola megala;0.84548447398376;  
AY346251;Lepidoptera;Erebia triaria;NA;NA;Erebia triaria;0.817907988878753;  
AY346252;Lepidoptera;Arethusana arethusana;Arethusana arethusana;1;Arethusana arethusana;0.99994982536517;  
AY346253;Lepidoptera;Aphantopus hyperantus;NA;0.102;Aphantopus hyperantus;0.9990049472058;  
AY346254;Lepidoptera;Parnassius apollo;Parnassius apollo;1;Parnassius apollo;0.989969291602239;  
AY346255;Lepidoptera;Maniola tithonus;Pyronia tithonus;1;Pyronia tithonus;0.99999999836604;  
AY350455;Lepidoptera;Erebia meolans;Erebia meolans;NA;NA;0.822053333153082;  
AY350456;Lepidoptera;Aricia agestis;NA;0.001;NA;0.876484833993336;  
AY350457;Lepidoptera;Plebejus argus;Plebejus argus;0.016;NA;0.891200580206937;  
AY350458;Lepidoptera;Plebejus argus;Plebejus argus;0.016;NA;0.901251123961532;  
AY350459;Lepidoptera;Plebejus argus;Plebejus argus;0.016;NA;0.889897037311938;  
AY350462;Lepidoptera;Erebia triaria;NA;0.122;NA;0.99999999266715;

AY556855;Lepidoptera;Polyommatus escheri;Polyommatus escheri;1;Polyommatus escheri;0.999957262319021;  
AY556862;Lepidoptera;Aricia artaxerxes;NA;0.064;Aricia artaxerxes;0.999307805158988;  
AY556863;Lepidoptera;Aricia artaxerxes;NA;0.052;Aricia agestis;0.985516448333493;  
AY556865;Lepidoptera;Aricia agestis;NA;0.129;Aricia agestis;0.964968588620611;  
AY556942;Lepidoptera;Polyommatus escheri;Polyommatus escheri;1;Polyommatus escheri;0.999999722390992;  
AY556945;Lepidoptera;Lysandra coridon;NA;NA;NA;0.997738326705677;  
AY556946;Lepidoptera;Polyommatus dorylas;Polyommatus dorylas;0.016;Polyommatus dorylas;0.985037180771894;  
AY556947;Lepidoptera;Lampides boeticus;Lampides boeticus;1;Lampides boeticus;0.999999990742936;  
AY556949;Lepidoptera;Polyommatus icarus;Polyommatus icarus;0.003;Polyommatus icarus;0.978006664750656;  
AY556950;Lepidoptera;Satyrium esculi;Satyrium esculi;1;Satyrium esculi;0.99999991992124;  
AY556953;Lepidoptera;Aricia agestis;NA;0.046;Aricia montensis;0.998635282041986;  
AY556956;Lepidoptera;Aricia cramera;Aricia cramera;1;Aricia cramera;0.99997650674376;  
AY556961;Lepidoptera;Lysandra coridon;NA;NA;Lysandra hispana;0.90983622858907;  
AY556965;Lepidoptera;Lysandra coridon;NA;NA;NA;0.954573556903198;  
AY556979;Lepidoptera;Cupido osiris;Cupido osiris;1;Cupido osiris;0.999903158680877;  
AY556983;Lepidoptera;Polyommatus daphnis;Polyommatus daphnis;0.999;Polyommatus daphnis;0.727435480614624;  
AY556988;Lepidoptera;Lycaena thersamon;NA;0.359;Lycaena thersamon;0.967121964182512;  
AY556992;Lepidoptera;Polyommatus dorylas;Polyommatus dorylas;0.001;Polyommatus dorylas;0.992051531812644;  
AY556994;Lepidoptera;Polyommatus icarus;NA;0.002;NA;0.999998064332033;  
AY557011;Lepidoptera;Lycaena tityrus;Lycaena tityrus;1;Lycaena tityrus;0.999985055494962;  
AY557016;Lepidoptera;Lampides boeticus;Lampides boeticus;1;Lampides boeticus;0.99999964282325;  
AY557018;Lepidoptera;Polyommatus daphnis;Polyommatus daphnis;0.996;Polyommatus daphnis;0.929450889194657;  
AY557029;Lepidoptera;Polyommatus dorylas;Polyommatus dorylas;1;Polyommatus dorylas;0.995684102725221;  
AY557031;Lepidoptera;Aricia agestis;NA;0.065;Aricia agestis;0.989063108666142;  
AY557034;Lepidoptera;Maculinea arion;NA;0.045;NA;0.999999996881548;  
AY557035;Lepidoptera;Polyommatus amandus;Polyommatus amandus;0.007;Polyommatus amandus;0.999697391945753;  
AY557044;Lepidoptera;Celastrina argiolus;Celastrina argiolus;0.999;Celastrina argiolus;0.992752024611529;  
AY557053;Lepidoptera;Aricia eumedon;Aricia eumedon;0.001;Aricia eumedon;0.999936680633228;  
AY557115;Lepidoptera;Lycaena virgaureae;NA;0.225;Lycaena virgaureae;0.98729247149122;  
AY557121;Lepidoptera;Polyommatus damon;Polyommatus damon;1;Polyommatus damon;0.999996415198725;  
AY557126;Lepidoptera;Polyommatus eros;NA;0.002;NA;0.999980855413135;  
AY557127;Lepidoptera;Polyommatus humedasa;Polyommatus humedasa;1;Polyommatus humedasa;0.999488547236434;  
AY557128;Lepidoptera;Polyommatus humedasa;Polyommatus humedasa;1;Polyommatus humedasa;0.99877461416058;  
AY557130;Lepidoptera;Lysandra coridon;Lysandra coridon;0.001;NA;0.799193154522841;  
AY557131;Lepidoptera;Polyommatus damon;Polyommatus damon;1;Polyommatus damon;0.999989506599664;  
AY557133;Lepidoptera;Lysandra coridon gennargentii;NA;NA;NA;0.998624971615247;  
AY585886;Lepidoptera;Carterocephalus palaemon;NA;0.038;NA;0.999999997282839;  
AY585887;Lepidoptera;Carterocephalus palaemon;NA;0.038;NA;0.999999997282839;  
AY585889;Lepidoptera;Carterocephalus palaemon;NA;0.037;NA;0.999999994913945;  
AY585890;Lepidoptera;Carterocephalus palaemon;NA;0.038;NA;0.999999997282839;  
AY585891;Lepidoptera;Carterocephalus palaemon;NA;0.038;NA;0.999999997282839;  
AY675402;Lepidoptera;Maculinea arion;NA;0.001;NA;0.751343203187268;  
AY675406;Lepidoptera;Maculinea alcon;NA;0.201;NA;0.761398063497889;  
AY675407;Lepidoptera;Maculinea arion;NA;0.002;NA;0.721737654212504;  
AY675413;Lepidoptera;Glaucopsyche alexis;NA;0.001;NA;0.723075189423239;  
AY675414;Lepidoptera;Iolana iolas;NA;NA;NA;0.786125520931428;  
AY675415;Lepidoptera;Maculinea rebeli;NA;0.298;NA;0.741235044277175;  
AY675417;Lepidoptera;Maculinea alcon;NA;0.126;NA;0.812865253726509;  
AY675418;Lepidoptera;Maculinea teleius;NA;0.001;NA;0.834938625273714;  
AY675422;Lepidoptera;Maculinea arion;NA;0.001;NA;0.82099423712478;  
AY675428;Lepidoptera;Maculinea teleius;NA;NA;NA;0.730449573632859;  
AY675429;Lepidoptera;Maculinea teleius;NA;0.001;NA;0.728492652184826;  
AY675430;Lepidoptera;Maculinea alcon;NA;0.119;NA;0.707211510265174;  
AY675431;Lepidoptera;Maculinea alcon;NA;0.114;NA;0.750606888784308;  
AY675432;Lepidoptera;Maculinea arion;NA;0.066;NA;0.706297269727053;  
AY675433;Lepidoptera;Maculinea arion;NA;NA;NA;0.776239577469599;  
AY675434;Lepidoptera;Maculinea rebeli;NA;0.126;NA;0.707791312282221;  
AY675435;Lepidoptera;Maculinea rebeli;NA;0.001;NA;0.727473166227636;  
AY675436;Lepidoptera;Maculinea alcon;NA;0.278;NA;0.99999999916248;  
AY675445;Lepidoptera;Maculinea arion;NA;0.001;NA;0.744975014406251;  
AY675447;Lepidoptera;Maculinea arion;NA;0.001;NA;0.99999999986271;  
AY675448;Lepidoptera;Maculinea arion;NA;0.001;NA;0.737076953517932;  
BCLEP122-17;Lepidoptera;Pyronia tithonus;Pyronia tithonus;1;Pyronia tithonus;0.99999999999972;  
BDE009-18;Lepidoptera;Euphydryas aurinia;NA;0.001;Euphydryas aurinia;0.995576749826865;  
BDE010-18;Lepidoptera;Parnassius mnemosyne;Parnassius mnemosyne;1;Parnassius mnemosyne;0.999999761646734;

BDE011-18;Lepidoptera;Euphydryas aurinia;Euphydryas aurinia;0.02;Euphydryas aurinia;0.99668249939786;  
 BDE015-18;Lepidoptera;Euphydryas aurinia;Euphydryas aurinia;0.02;Euphydryas aurinia;0.99668249939786;  
 BDE016-18;Lepidoptera;Parnassius mnemosyne;Parnassius mnemosyne;1;Parnassius mnemosyne;0.999999600553986;  
 BDE017-18;Lepidoptera;Euphydryas aurinia;Euphydryas aurinia;0.012;Euphydryas aurinia;0.997780875235948;  
 BDE018-18;Lepidoptera;Euphydryas aurinia;NA;0.31;Euphydryas aurinia;0.993387708761386;  
 BDE021-18;Lepidoptera;Euphydryas aurinia;NA;0.008;Euphydryas aurinia;0.997216897249492;  
 BDE023-18;Lepidoptera;Euphydryas aurinia;NA;0.001;Euphydryas aurinia;0.995576749826865;  
 BDE025-18;Lepidoptera;Euphydryas aurinia;NA;0.31;Euphydryas aurinia;0.993387708761386;  
 BDE027-18;Lepidoptera;Euphydryas aurinia;NA;0.001;Euphydryas aurinia;0.995576749826865;  
 BDE028-18;Lepidoptera;Parnassius mnemosyne;Parnassius mnemosyne;1;Parnassius mnemosyne;0.99999987497234;  
 BDE029-18;Lepidoptera;Parnassius mnemosyne;Parnassius mnemosyne;1;Parnassius mnemosyne;0.99999987497234;  
 BDE030-18;Lepidoptera;Euphydryas aurinia;Euphydryas aurinia;0.016;Euphydryas aurinia;0.997751503369639;  
 BDE031-18;Lepidoptera;Euphydryas aurinia;Euphydryas aurinia;0.016;Euphydryas aurinia;0.997751503369639;  
 BDE036-18;Lepidoptera;Euphydryas aurinia;NA;0.31;Euphydryas aurinia;0.993387708761386;  
 BDE037-18;Lepidoptera;Euphydryas aurinia;NA;0.31;Euphydryas aurinia;0.993387708761386;  
 BDE038-18;Lepidoptera;Parnassius mnemosyne;Parnassius mnemosyne;1;Parnassius mnemosyne;0.999999761646734;  
 BDE039-18;Lepidoptera;Parnassius mnemosyne;Parnassius mnemosyne;1;Parnassius mnemosyne;0.999999761646734;  
 BDE042-18;Lepidoptera;Parnassius mnemosyne;Parnassius mnemosyne;1;Parnassius mnemosyne;0.999999416965636;  
 BDE043-18;Lepidoptera;Parnassius mnemosyne;Parnassius mnemosyne;1;Parnassius mnemosyne;0.999999416965636;  
 BDE045-18;Lepidoptera;Parnassius mnemosyne;Parnassius mnemosyne;1;Parnassius mnemosyne;0.999999416965636;  
 BDE046-18;Lepidoptera;Parnassius mnemosyne;Parnassius mnemosyne;1;Parnassius mnemosyne;0.999999131309189;  
 BDE048-18;Lepidoptera;Parnassius mnemosyne;Parnassius mnemosyne;1;Parnassius mnemosyne;0.999996958841953;  
 BDE049-18;Lepidoptera;Parnassius mnemosyne;Parnassius mnemosyne;1;Parnassius mnemosyne;0.999998906020325;  
 BDE050-18;Lepidoptera;Parnassius mnemosyne;Parnassius mnemosyne;1;Parnassius mnemosyne;0.999999416965636;  
 BDE051-18;Lepidoptera;Parnassius mnemosyne;Parnassius mnemosyne;1;Parnassius mnemosyne;0.999999416965636;  
 BDE052-18;Lepidoptera;Parnassius mnemosyne;Parnassius mnemosyne;0.999;Parnassius mnemosyne;0.999999453050897;  
 BDE054-18;Lepidoptera;Parnassius mnemosyne;Parnassius mnemosyne;1;Parnassius mnemosyne;0.999999416965636;  
 BDE055-18;Lepidoptera;Parnassius mnemosyne;Parnassius mnemosyne;1;Parnassius mnemosyne;0.999999416965636;  
 BDE057-18;Lepidoptera;Parnassius mnemosyne;Parnassius mnemosyne;1;Parnassius mnemosyne;0.999999416965636;  
 BDE062-18;Lepidoptera;Parnassius mnemosyne;Parnassius mnemosyne;1;Parnassius mnemosyne;0.999999761646734;  
 BDE1039-22;Lepidoptera;Gonepteryx rhamni;Gonepteryx rhamni;1;Gonepteryx rhamni;0.99964616790002;  
 BDE1040-22;Lepidoptera;Gonepteryx rhamni;Gonepteryx rhamni;1;Gonepteryx rhamni;0.99964616790002;  
 BDE1041-22;Lepidoptera;Gonepteryx rhamni;NA;0.474;Gonepteryx rhamni;0.982076396127858;  
 BDE1042-22;Lepidoptera;Gonepteryx rhamni;NA;0.474;Gonepteryx rhamni;0.982076396127858;  
 BDE1043-22;Lepidoptera;Gonepteryx rhamni;Gonepteryx rhamni;1;Gonepteryx rhamni;0.99964616790002;  
 BDE1044-22;Lepidoptera;Gonepteryx rhamni;Gonepteryx rhamni;1;Gonepteryx rhamni;0.99964616790002;  
 BDE1045-22;Lepidoptera;Gonepteryx rhamni;Gonepteryx rhamni;1;Gonepteryx rhamni;0.99964616790002;  
 BDE1046-22;Lepidoptera;Gonepteryx rhamni;NA;0.474;Gonepteryx rhamni;0.982076396127858;  
 BDE1047-22;Lepidoptera;Gonepteryx rhamni;NA;0.474;Gonepteryx rhamni;0.982076396127858;  
 BDE1048-22;Lepidoptera;Gonepteryx rhamni;Gonepteryx rhamni;1;Gonepteryx rhamni;0.999850170258883;  
 BDE1049-22;Lepidoptera;Gonepteryx rhamni;Gonepteryx rhamni;1;Gonepteryx rhamni;0.99964616790002;  
 BDE1050-22;Lepidoptera;Gonepteryx rhamni;Gonepteryx rhamni;1;Gonepteryx rhamni;0.99964616790002;  
 BDE206-19;Lepidoptera;Aglais urticae;NA;0.002;Aglais urticae;0.987497593219019;  
 BDE207-19;Lepidoptera;Anthocharis euphenoides;NA;0.172;Anthocharis euphenoides;0.943741664916385;  
 BDE208-19;Lepidoptera;Aphantopus hyperantus;Aphantopus hyperantus;0.003;Aphantopus hyperantus;0.999999455871523;  
 BDE209-19;Lepidoptera;Argynnis adippe;Fabriciana adippe;1;Fabriciana adippe;0.999722411724441;  
 BDE210-19;Lepidoptera;Argynnis aglaja;NA;NA;NA;0.99999999998776;  
 BDE211-19;Lepidoptera;Aricia cramera;NA;0.001;Aricia montensis;0.99557916540038;  
 BDE213-19;Lepidoptera;Boloria dia;Boloria dia;1;Boloria dia;0.99999999980503;  
 BDE215-19;Lepidoptera;Brenthis daphne;Brenthis daphne;0.001;Brenthis daphne;0.997781825264304;  
 BDE217-19;Lepidoptera;Brenthis ino;NA;0.061;Brenthis ino;0.791997215074462;  
 BDE219-19;Lepidoptera;Boloria euphrosyne;NA;NA;Boloria euphrosyne;0.999936593845194;

BDE222-19;Lepidoptera;Coenonympha arcania;NA;0.022;Coenonympha arcania;0.972706499739185;  
BDE223-19;Lepidoptera;Coenonympha dorus;Coenonympha dorus;1;Coenonympha dorus;0.99999999915957;  
BDE224-19;Lepidoptera;Coenonympha glycerion;NA;0.055;Coenonympha glycerion;0.99999566036386;  
BDE225-19;Lepidoptera;Colias alfacariensis;Colias alfacariensis;0.001;Colias alfacariensis;0.999857790810452;  
BDE226-19;Lepidoptera;Colias phicomone;NA;0.064;Colias phicomone;0.992122721786916;  
BDE227-19;Lepidoptera;Cupido argiades;NA;0.498;NA;0.999999999965209;  
BDE228-19;Lepidoptera;Cupido minimus;NA;0.001;Cupido minimus;0.999751488575214;  
BDE230-19;Lepidoptera;Erebia epiphron;NA;NA;Erebia euryale;0.93493911427573;  
BDE231-19;Lepidoptera;Erebia euryale;NA;NA;Erebia euryale;0.902406174360953;  
BDE233-19;Lepidoptera;Erebia manto;NA;0.091;Erebia manto;0.99940430793667;  
BDE234-19;Lepidoptera;Erebia meolans;Erebia meolans;NA;Erebia meolans;0.999670624550747;  
BDE236-19;Lepidoptera;Erebia triaria;NA;0.051;Erebia triarius;0.840521161239895;  
BDE238-19;Lepidoptera;Glaucopsyche melanops;Glaucopsyche melanops;1;Glaucopsyche melanops;0.999860230433135;  
BDE239-19;Lepidoptera;Gonepteryx cleopatra;Gonepteryx cleopatra;0.998;Gonepteryx cleopatra;0.999118636582266;  
BDE240-19;Lepidoptera;Hamearis lucina;NA;NA;Hamearis lucina;0.99999999979167;  
BDE243-19;Lepidoptera;Hipparchia semele;NA;0.003;Hipparchia semele;0.855676008628351;  
BDE246-19;Lepidoptera;Brintesia circe;Brintesia circe;1;Brintesia circe;0.9999954171695;  
BDE249-19;Lepidoptera;Lycaena tityrus;Lycaena tityrus;1;Lycaena tityrus;0.999997855580031;  
BDE250-19;Lepidoptera;Lycaena virgaureae;NA;0.176;Lycaena virgaureae;0.999417010436143;  
BDE251-19;Lepidoptera;Melanargia galathea;Melanargia galathea;0.009;Melanargia galathea;0.985492042252146;  
BDE255-19;Lepidoptera;Melitaea cinxia;Melitaea cinxia;1;Melitaea cinxia;0.99999999999602;  
BDE256-19;Lepidoptera;Parnassius apollo;Parnassius apollo;1;Parnassius apollo;0.997639119991203;  
BDE258-19;Lepidoptera;Pieris napi;NA;NA;Pieris napi;0.744610646821454;  
BDE259-19;Lepidoptera;Plebejus argus;Plebejus argus;0.014;Plebejus argus;0.979849220658559;  
BDE260-19;Lepidoptera;Plebejus idas;NA;0.007;NA;0.999546324331549;  
BDE261-19;Lepidoptera;Polygonia c-album;NA;0.215;NA;0.999999192918557;  
BDE262-19;Lepidoptera;Polyommatus dorylas;Polyommatus dorylas;0.025;Polyommatus dorylas;0.973229109265438;  
BDE267-19;Lepidoptera;Satyrium acaciae;Satyrium acaciae;1;Satyrium acaciae;0.99999991343697;  
BDE268-19;Lepidoptera;Satyrium esculi;Satyrium esculi;1;Satyrium esculi;0.999999957210833;  
BDE269-19;Lepidoptera;Satyrium ilicis;Satyrium ilicis;1;Satyrium ilicis;0.99999981931609;  
BDE270-19;Lepidoptera;Satyrium spini;Satyrium spini;1;Satyrium spini;0.999998173309697;  
BDE271-19;Lepidoptera;Spialia sertorius;Spialia sertorius;1;Spialia sertorius;0.99999984019468;  
BDE273-19;Lepidoptera;Favonius quercus;NA;NA;NA;0.999999999996165;  
BDE299-19;Lepidoptera;Anthocharis euphenoides;NA;0.048;Anthocharis euphenoides;0.964164577868293;  
BDE301-19;Lepidoptera;Argynnis aglaja;NA;0.005;Speyeria aglaja;0.896438572419641;  
BDE302-19;Lepidoptera;Erebia triaria;NA;0.182;NA;1;  
BDE310-19;Lepidoptera;Satyrium esculi;Satyrium esculi;1;Satyrium esculi;0.999999957367948;  
BDE313-19;Lepidoptera;Coenonympha dorus;Coenonympha dorus;1;Coenonympha dorus;0.99999999988259;  
BDE317-19;Lepidoptera;Satyrium spini;Satyrium spini;1;Satyrium spini;0.999987432167351;  
BDE321-19;Lepidoptera;Lasionmatta megera;Lasionmatta megera;1;Lasionmatta megera;0.999928528239676;  
BDE322-19;Lepidoptera;Maniola jurtina;NA;0.001;Maniola jurtina;0.939220105860875;  
BDE323-19;Lepidoptera;Pieris napi;NA;0.011;Pieris napi;0.801985394724814;  
BDE326-19;Lepidoptera;Pyronia cecilia;Pyronia cecilia;1;Pyronia cecilia;1;  
BDE327-19;Lepidoptera;Hipparchia semele;NA;0.001;Hipparchia semele;0.802446092830354;  
BDE328-19;Lepidoptera;Colias alfacariensis;Colias alfacariensis;0.001;Colias alfacariensis;0.999857790810452;  
BDE331-19;Lepidoptera;Polygonia c-album;NA;0.215;NA;0.999999192918557;  
BDE332-19;Lepidoptera;Pyronia cecilia;Pyronia cecilia;1;Pyronia cecilia;1;  
BDE333-19;Lepidoptera;Polyommatus celina;NA;0.098;Polyommatus celina;0.99999999912802;  
BDE334-19;Lepidoptera;Pieris napi;NA;0.028;Pieris napi;0.888205720664699;  
BDE335-19;Lepidoptera;Satyrium esculi;Satyrium esculi;1;Satyrium esculi;0.999999957367948;  
BDE336-19;Lepidoptera;Gonepteryx rhamni;NA;0.271;Gonepteryx rhamni;0.99904249910688;  
BDE338-19;Lepidoptera;Gonepteryx rhamni;Gonepteryx rhamni;1;Gonepteryx rhamni;0.999850170258883;  
BDE340-19;Lepidoptera;Pyronia tithonus;Pyronia tithonus;NA;Pyronia tithonus;1;  
BDE341-19;Lepidoptera;Pyronia cecilia;Pyronia cecilia;NA;Pyronia cecilia;1;  
BDE342-19;Lepidoptera;Satyrium esculi;Satyrium esculi;1;Satyrium esculi;0.999999957367948;  
BDE343-19;Lepidoptera;Polyommatus celina;Polyommatus celina;0.012;Polyommatus celina;0.99999999936477;  
BDE348-19;Lepidoptera;Gonepteryx cleopatra;Gonepteryx cleopatra;0.001;Gonepteryx cleopatra;0.998922340478632;  
BDE349-19;Lepidoptera;Satyrium esculi;Satyrium esculi;1;Satyrium esculi;0.999999957367948;  
BDE351-19;Lepidoptera;Melitaea nevadensis;Melitaea celadussa;0.999;Melitaea celadussa;0.998819206090668;  
BDE352-19;Lepidoptera;Gonepteryx rhamni;Gonepteryx rhamni;1;Gonepteryx rhamni;0.999850170258883;  
BDE353-19;Lepidoptera;Polygonia c-album;NA;0.214;NA;0.999999114245056;  
BDE354-19;Lepidoptera;Polyommatus icarus;Polyommatus icarus;0.001;Polyommatus icarus;0.999851522482238;  
BDE357-19;Lepidoptera;Coenonympha dorus;Coenonympha dorus;1;Coenonympha dorus;0.999999999259217;  
BDE358-19;Lepidoptera;Pyronia tithonus;Pyronia tithonus;1;Pyronia tithonus;1;  
BDE360-19;Lepidoptera;Polyommatus celina;Polyommatus celina;0.009;Polyommatus celina;0.99999999949694;  
BDE362-19;Lepidoptera;Coenonympha dorus;Coenonympha dorus;1;Coenonympha dorus;0.99999999988259;

BDE363-19;Lepidoptera;Hipparchia statilinus;Hipparchia statilinus;1;Hipparchia  
statilinus;0.99999999999801;  
BDE364-19;Lepidoptera;Polyommatus celina;NA;0.072;Polyommatus celina;0.999999999953559;  
BDE365-19;Lepidoptera;Hipparchia statilinus;Hipparchia statilinus;1;Hipparchia  
statilinus;0.99999999999318;  
BDE368-19;Lepidoptera;Polyommatus celina;NA;0.025;Polyommatus celina;0.999999999946397;  
BDE371-19;Lepidoptera;Polyommatus celina;NA;0.067;Polyommatus celina;0.999999999867015;  
BDE372-19;Lepidoptera;Polyommatus celina;Polyommatus celina;0.012;Polyommatus  
celina;0.99999999969816;  
BDE373-19;Lepidoptera;Pyronia cecilia;Pyronia cecilia;1;Pyronia cecilia;0.99999999999972;  
BDE374-19;Lepidoptera;Hipparchia statilinus;Hipparchia statilinus;1;Hipparchia  
statilinus;0.99999999999801;  
BDE375-19;Lepidoptera;Polyommatus celina;NA;0.072;Polyommatus celina;0.999999999953559;  
BDE376-19;Lepidoptera;Pyronia cecilia;Pyronia cecilia;1;Pyronia cecilia;1;  
BDE378-19;Lepidoptera;Hipparchia statilinus;Hipparchia statilinus;1;Hipparchia  
statilinus;0.99999999999545;  
BDE384-19;Lepidoptera;Pyronia tithonus;Pyronia tithonus;1;Pyronia tithonus;1;  
BDE386-19;Lepidoptera;Minois dryas;NA;0.025;Minois dryas;0.850746026247397;  
BDE389-19;Lepidoptera;Gonepteryx rhamni;Gonepteryx rhamni;0.008;Gonepteryx  
rhamni;0.999576796993255;  
BDE390-19;Lepidoptera;Pieris napi;NA;NA;Pieris napi;0.860244891707633;  
BDE391-19;Lepidoptera;Lycaena tityrus;Lycaena tityrus;1;Lycaena tityrus;0.999997855580031;  
BDE392-19;Lepidoptera;Pyronia tithonus;Pyronia tithonus;1;Pyronia tithonus;1;  
BDE393-19;Lepidoptera;Polygonia c-album;NA;0.215;NA;0.999999192918557;  
BDE397-19;Lepidoptera;Araschnia levana;Araschnia levana;1;Araschnia levana;0.999999772187832;  
BDE399-19;Lepidoptera;Aricia agestis;NA;0.067;Aricia agestis;0.999509743227786;  
BDE400-19;Lepidoptera;Pyronia tithonus;Pyronia tithonus;1;Pyronia tithonus;0.99999999999972;  
BDE403-19;Lepidoptera;Melitaea trivia;Melitaea trivia;1;Melitaea trivia;0.99999999923034;  
BDE404-19;Lepidoptera;Pieris napi;NA;NA;Pieris napi;0.783894617328234;  
BDE405-19;Lepidoptera;Lasiommata megera;Lasiommata megera;1;Lasiommata megera;0.999928528239676;  
BDE406-19;Lepidoptera;Maniola jurtina;NA;0.014;Maniola jurtina;0.792979225803034;  
BDE407-19;Lepidoptera;Lasiommata maera;Lasiommata maera;1;Lasiommata maera;0.999997945450226;  
BDE408-19;Lepidoptera;Hipparchia fidia;Hipparchia fidia;1;Hipparchia fidia;1;  
BDE409-19;Lepidoptera;Hipparchia fidia;Hipparchia fidia;1;Hipparchia fidia;1;  
BDE410-19;Lepidoptera;Hipparchia hermione;Hipparchia hermione;1;Hipparchia  
hermione;0.999950501544645;  
BDE412-19;Lepidoptera;Pyronia tithonus;Pyronia tithonus;1;Pyronia tithonus;1;  
BDE413-19;Lepidoptera;Satyrus actaea;Satyrus actaea;0.002;Satyrus actaea;0.995392408098466;  
BDE414-19;Lepidoptera;Pyronia tithonus;Pyronia tithonus;1;Pyronia tithonus;1;  
BDE416-19;Lepidoptera;Polyommatus icarus;NA;0.004;Polyommatus icarus;0.999481683747521;  
BDE419-19;Lepidoptera;Coenonympha pamphilus;Coenonympha pamphilus;1;Coenonympha  
pamphilus;0.99999999999744;  
BDE420-19;Lepidoptera;Brintesia circe;Brintesia circe;1;Brintesia circe;0.999995749349661;  
BDE421-19;Lepidoptera;Colias crocea;NA;NA;NA;0.99999999999712;  
BDE422-19;Lepidoptera;Satyrium esculi;Satyrium esculi;1;Satyrium esculi;0.999999957367948;  
BDE424-19;Lepidoptera;Lampides boeticus;Lampides boeticus;1;Lampides boeticus;0.999999999637112;  
BDE427-19;Lepidoptera;Hipparchia hermione;Hipparchia hermione;1;Hipparchia  
hermione;0.99988238204256;  
BDE430-19;Lepidoptera;Gonepteryx rhamni;Gonepteryx rhamni;0.003;Gonepteryx  
rhamni;0.999853350566569;  
BDE431-19;Lepidoptera;Hipparchia semele;NA;0.005;Hipparchia semele;0.811250086847141;  
BDE432-19;Lepidoptera;Satyrium ilicis;Satyrium ilicis;1;Satyrium ilicis;0.999999985717665;  
BDE433-19;Lepidoptera;Satyrium spini;Satyrium esculi;1;Satyrium esculi;0.999999957367948;  
BDE434-19;Lepidoptera;Lycaena tityrus;Lycaena bleusei;1;Lycaena bleusei;0.999986494424373;  
BDE435-19;Lepidoptera;Pyronia tithonus;Pyronia tithonus;1;Pyronia tithonus;1;  
BDE437-19;Lepidoptera;Melitaea didyma;Melitaea didyma;NA;NA;Melitaea didyma;0.980272836986251;  
BDE440-19;Lepidoptera;Colias crocea;NA;0.059;NA;0.99999999999738;  
BDE444-19;Lepidoptera;Pyronia cecilia;Pyronia cecilia;NA;Pyronia cecilia;1;  
BDE446-19;Lepidoptera;Melitaea didyma;Melitaea didyma;1;Melitaea didyma;0.996477093809569;  
BDE447-19;Lepidoptera;Lycaena virgaureae;NA;0.113;Lycaena virgaureae;0.999506208964591;  
BDE448-19;Lepidoptera;Melanargia galathea;Melanargia galathea;NA;Melanargia  
galathea;0.97229026078718;  
BDE449-19;Lepidoptera;Argynnis aglaja;NA;0.002;Speyeria aglaja;0.87239079736947;  
BDE450-19;Lepidoptera;Pararge aegeria;Pararge aegeria;1;Pararge aegeria;0.999999999963165;  
BDE452-19;Lepidoptera;Lycaena phlaeas;Lycaena phlaeas;1;Lycaena phlaeas;0.999999996363186;  
BDE453-19;Lepidoptera;Hipparchia fidia;Hipparchia fidia;1;Hipparchia fidia;1;  
BDE455-19;Lepidoptera;Celastrina argiolus;Celastrina argiolus;1;Celastrina  
argiolus;0.999527385150531;  
BDE457-19;Lepidoptera;Glaucopsyche melanops;Glaucopsyche melanops;1;Glaucopsyche  
melanops;0.999952924254607;  
BDE459-19;Lepidoptera;Issoria lathonia;Issoria lathonia;1;Issoria lathonia;0.999999999989257;  
BDE463-19;Lepidoptera;Pyronia cecilia;Pyronia cecilia;1;Pyronia cecilia;1;  
BDE464-19;Lepidoptera;Glaucopsyche melanops;Glaucopsyche melanops;1;Glaucopsyche  
melanops;0.999952924254607;  
BDE467-19;Lepidoptera;Pyronia cecilia;NA;NA;Pyronia cecilia;0.99999999999943;  
BDE480-19;Lepidoptera;Pyronia cecilia;Pyronia cecilia;1;Pyronia cecilia;1;  
BDE482-19;Lepidoptera;Satyrium esculi;Satyrium esculi;1;Satyrium esculi;0.9999975269745;



BDE486-19;Lepidoptera;Coenonympha pamphilus;Coenonympha pamphilus;1;Coenonympha  
pamphilus;0.99999999999744;  
BDE489-19;Lepidoptera;Polyommatus celina;Polyommatus celina;0.009;Polyommatus  
celina;0.99999999949694;  
BDE491-19;Lepidoptera;Pyronia cecilia;Pyronia cecilia;1;Pyronia cecilia;0.999999999999943;  
BDE495-19;Lepidoptera;Satyrus actaea;NA;0.001;Satyrus actaea;0.990911087649489;  
BDE496-19;Lepidoptera;Satyrium spini;Satyrium spini;1;Satyrium spini;0.999997334596599;  
BDE498-19;Lepidoptera;Pieris napi;NA;0.011;Pieris napi;0.801985394724814;  
BDE499-19;Lepidoptera;Anthocharis cardamines;Anthocharis cardamines;0.002;Anthocharis  
cardamines;0.99999951714672;  
BDE500-19;Lepidoptera;Gonepteryx rhamni;NA;0.474;Gonepteryx rhamni;0.982076396127858;  
BDE501-19;Lepidoptera;Cupido argiades;NA;0.499;NA;0.99999999984682;  
BDE502-19;Lepidoptera;Lycaena phlaeas;Lycaena phlaeas;1;Lycaena phlaeas;0.99999996363186;  
BDE506-19;Lepidoptera;Boloria dia;Boloria dia;1;Boloria dia;0.99999999980503;  
BDE508-19;Lepidoptera;Araschnia levana;Araschnia levana;1;Araschnia levana;0.999999772187832;  
BDE511-19;Lepidoptera;Papilio machaon;Papilio machaon;0.003;Papilio machaon;0.999482752749035;  
BDE513-19;Lepidoptera;Araschnia levana;Araschnia levana;1;Araschnia levana;0.999999772187832;  
BDE514-19;Lepidoptera;Pieris napi;NA;0.011;Pieris napi;0.801985394724814;  
BDE515-19;Lepidoptera;Aglais urticae;Aglais urticae;0.001;Aglais urticae;0.990690600684087;  
BDE516-19;Lepidoptera;Melitaea cinxia;Melitaea cinxia;1;Melitaea cinxia;0.999999999999943;  
BDE520-19;Lepidoptera;Anthocharis euphenoides;NA;NA;Anthocharis euphenoides;0.960146267594346;  
BDE521-19;Lepidoptera;Aricia agestis;Aricia cramera;1;Aricia cramera;0.999993731037033;  
BDE522-19;Lepidoptera;Lycaena phlaeas;Lycaena phlaeas;1;Lycaena phlaeas;0.99999991873125;  
BDE525-19;Lepidoptera;Callophrys rubi;NA;0.001;Callophrys rubi;0.99870518510598;  
BDE526-19;Lepidoptera;Glaucopsyche melanops;Glaucopsyche melanops;1;Glaucopsyche  
melanops;0.999957693018609;  
BDE527-19;Lepidoptera;Lasiommata maera;Lasiommata maera;1;Lasiommata maera;0.99999857497297;  
BDE533-19;Lepidoptera;Polyommatus icarus;NA;0.026;Polyommatus icarus;0.826249354925025;  
BDE537-19;Lepidoptera;Gonepteryx rhamni;Gonepteryx rhamni;0.005;Gonepteryx  
rhamni;0.9997748982174;  
BDE538-19;Lepidoptera;Polyommatus celina;NA;0.025;Polyommatus celina;0.99999999946397;  
BDE542-19;Lepidoptera;Euphydryas aurinia;Euphydryas aurinia;0.02;Euphydryas  
aurinia;0.99668249939786;  
BDE543-19;Lepidoptera;Lycaena phlaeas;Lycaena phlaeas;1;Lycaena phlaeas;0.99999996363186;  
BDE544-19;Lepidoptera;Satyrium spini;Satyrium spini;1;Satyrium spini;0.99998759142769;  
BDE546-19;Lepidoptera;Satyrium esculi;Satyrium esculi;1;Satyrium esculi;0.99999975795589;  
BDE547-19;Lepidoptera;Satyrium spini;Satyrium spini;1;Satyrium spini;0.999990225283962;  
BDE551-19;Lepidoptera;Satyrium esculi;Satyrium esculi;1;Satyrium esculi;0.999999836089486;  
BDE555-19;Lepidoptera;Gonepteryx cleopatra;Gonepteryx cleopatra;0.998;Gonepteryx  
cleopatra;0.999118636582266;  
BDE556-19;Lepidoptera;Polyommatus celina;Polyommatus celina;0.009;Polyommatus  
celina;0.99999999949694;  
BDE563-19;Lepidoptera;Maniola jurtina;NA;0.001;Maniola jurtina;0.939220105860875;  
BDE564-19;Lepidoptera;Aricia cramera;Aricia cramera;1;Aricia cramera;0.999993731037033;  
BDE565-19;Lepidoptera;Colias crocea;NA;0.059;NA;0.99999999999738;  
BDE571-19;Lepidoptera;Lasiommata megera;Lasiommata megera;1;Lasiommata megera;0.999928528239676;  
BDE572-19;Lepidoptera;Lampides boeticus;Lampides boeticus;1;Lampides boeticus;0.9999999545906;  
BDE573-19;Lepidoptera;Polyommatus celina;NA;0.022;Polyommatus celina;0.99999999893788;  
BDE606-19;Lepidoptera;Euphydryas aurinia;Euphydryas aurinia;0.015;Euphydryas  
aurinia;0.995469278399974;  
BDE734-21;Lepidoptera;Aglais urticae;Aglais urticae;0.001;Aglais urticae;0.990690600684087;  
BDE735-21;Lepidoptera;Aglais urticae;NA;0.004;Aglais urticae;0.980243655259103;  
BDE736-21;Lepidoptera;Aglais urticae;NA;0.002;Aglais urticae;0.987497593219019;  
BDE737-21;Lepidoptera;Aglais urticae;NA;0.004;Aglais urticae;0.976209345945922;  
BDE738-21;Lepidoptera;Aglais urticae;NA;0.002;Aglais urticae;0.987497593219019;  
BDE739-21;Lepidoptera;Aglais urticae;NA;0.002;Aglais urticae;0.987497593219019;  
BDE740-21;Lepidoptera;Aglais urticae;Aglais urticae;0.001;Aglais urticae;0.994396335177485;  
BDE741-21;Lepidoptera;Aglais urticae;NA;0.002;Aglais urticae;0.987497593219019;  
BDE742-21;Lepidoptera;Aglais urticae;NA;0.002;Aglais urticae;0.987497593219019;  
BDE743-21;Lepidoptera;Aglais urticae;NA;0.117;Aglais urticae;0.986519693221239;  
BDE744-21;Lepidoptera;Aglais urticae;Aglais urticae;0.001;Aglais urticae;0.994396335177485;  
BDE745-21;Lepidoptera;Aglais urticae;Aglais urticae;0.967;Aglais urticae;0.992839340839702;  
BDE746-21;Lepidoptera;Aglais urticae;Aglais urticae;0.001;Aglais urticae;0.989513941242214;  
BDE747-21;Lepidoptera;Aglais urticae;Aglais urticae;0.001;Aglais urticae;0.994396335177485;  
BDE748-21;Lepidoptera;Aglais urticae;Aglais urticae;0.001;Aglais urticae;0.994396335177485;  
BDE749-21;Lepidoptera;Aglais urticae;Aglais urticae;1;Aglais urticae;0.996080669636376;  
BDE750-21;Lepidoptera;Aglais urticae;Aglais urticae;0.004;Aglais urticae;0.995016750255472;  
BDE751-21;Lepidoptera;Aglais urticae;Aglais urticae;0.001;Aglais urticae;0.994396335177485;  
BDE752-21;Lepidoptera;Aglais urticae;Aglais urticae;0.001;Aglais urticae;0.990690600684087;  
BDE753-21;Lepidoptera;Aglais urticae;Aglais urticae;0.001;Aglais urticae;0.990690600684087;  
BDE754-21;Lepidoptera;Aglais urticae;Aglais urticae;0.001;Aglais urticae;0.994966452807995;  
BDE755-21;Lepidoptera;Aglais urticae;NA;0.002;Aglais urticae;0.987497593219019;  
BDE756-21;Lepidoptera;Aglais urticae;Aglais urticae;0.001;Aglais urticae;0.990690600684087;  
BDE757-21;Lepidoptera;Aglais urticae;Aglais urticae;0.001;Aglais urticae;0.990690600684087;  
BDE760-21;Lepidoptera;Aglais urticae;NA;0.001;Aglais urticae;0.983431756290712;  
BDE761-21;Lepidoptera;Aglais urticae;NA;0.002;Aglais urticae;0.987497593219019;  
BDE762-21;Lepidoptera;Aglais urticae;NA;0.002;Aglais urticae;0.987497593219019;  
BDE763-21;Lepidoptera;Aglais ichtusa;Aglais ichtusa;0.998;NA;0.999999996206876;

BDE764-21;Lepidoptera;Aglais urticae;Aglais urticae;0.001;Aglais urticae;0.994396335177485;  
BDE765-21;Lepidoptera;Aglais ichnusa;Aglais ichnusa;0.998;NA;0.999999996206876;  
BIBSA128-15;Lepidoptera;Pyronia tithonus;Pyronia tithonus;1;Pyronia tithonus;0.99999999999119;  
BIBSA134-15;Lepidoptera;Hyponephele lycaon;Hyponephele lycaon;1;Hyponephele  
lycaon;0.999999996686455;  
BIBSA1465-16;Lepidoptera;Erebia melampus;NA;0.384;Erebia melampus;0.806595181092398;  
BIBSA1489-16;Lepidoptera;Lycaena dispar;Lycaena dispar;0.001;Lycaena dispar;0.999999996828279;  
BIBSA1901-19;Lepidoptera;Polyommatus bellargus;NA;NA;Lysandra bellargus;0.995544920417663;  
BIBSA1903-19;Lepidoptera;Plebejus argus;NA;0.11;Plebejus argus;0.967857858868143;  
BIBSA1904-19;Lepidoptera;Maculinea arion;NA;0.026;Phengaris arion;0.932223897575527;  
BIBSA1905-19;Lepidoptera;Maculinea arion;NA;0.054;Phengaris arion;0.938397095316026;  
BIBSA1907-19;Lepidoptera;Cupido argiades;NA;0.485;NA;0.99999999982933;  
BIBSA1908-19;Lepidoptera;Plebejus idas;NA;0.297;Plebejus argus;0.966815475875377;  
BIBSA1910-19;Lepidoptera;Thymelicus lineola;Thymelicus lineola;1;Thymelicus  
lineola;0.999996457070319;  
BIBSA1911-19;Lepidoptera;Thymelicus sylvestris;Thymelicus sylvestris;1;Thymelicus  
sylvestris;0.99999991232329;  
BIBSA1912-19;Lepidoptera;Maniola jurtina;NA;0.038;NA;0.99999999999524;  
BIBSA1913-19;Lepidoptera;Thymelicus acteon;Thymelicus acteon;1;Thymelicus  
acteon;0.999999993688419;  
BIBSA1914-19;Lepidoptera;Lycaena phlaeas;Lycaena phlaeas;1;Lycaena phlaeas;0.999999976990381;  
BIBSA1915-19;Lepidoptera;Satyrium ilicis;Satyrium ilicis;1;Satyrium ilicis;0.999993003728494;  
BIBSA1916-19;Lepidoptera;Satyrium ilicis;Satyrium ilicis;1;Satyrium ilicis;0.99999984678283;  
BIBSA1917-19;Lepidoptera;Colias crocea;NA;0.059;NA;0.99999999999738;  
BIBSA1918-19;Lepidoptera;Lasiommata megera;Lasiommata megera;0.001;Lasiommata  
megera;0.999466241471132;  
BIBSA1919-19;Lepidoptera;Pararge aegeria;Pararge aegeria;1;Pararge aegeria;0.999999999197257;  
BIBSA1921-19;Lepidoptera;Lasiommata maera;Lasiommata maera;1;Lasiommata maera;0.999995042435739;  
BIBSA1922-19;Lepidoptera;Lasiommata maera;Lasiommata maera;0.003;Lasiommata  
maera;0.999986871370403;  
BIBSA1923-19;Lepidoptera;Coenonympha arcania;NA;0.105;NA;0.99999999999971;  
BIBSA1924-19;Lepidoptera;Plebejus idas;Polyommatus escheri;1;Polyommatus  
escheri;0.999999967858628;  
BIBSA1928-19;Lepidoptera;Polyommatus escheri;Polyommatus escheri;1;Polyommatus  
escheri;0.999999986318471;  
BIBSA1929-19;Lepidoptera;Cupido minimus;NA;0.009;Cupido minimus;0.999687653269194;  
BIBSA1930-19;Lepidoptera;Melitaea cinxia;Melitaea cinxia;1;Melitaea cinxia;0.99999999999062;  
BIBSA1933-19;Lepidoptera;Pararge aegeria;Pararge aegeria;1;Pararge aegeria;0.999999999963165;  
BIBSA1934-19;Lepidoptera;Pararge aegeria;Pararge aegeria;1;Pararge aegeria;0.99999999119342;  
BIBSA1935-19;Lepidoptera;Maniola jurtina;NA;NA;Maniola jurtina;0.890930381730166;  
BIBSA1936-19;Lepidoptera;Maniola jurtina;NA;0.011;Maniola jurtina;0.919381504201813;  
BIBSA1937-19;Lepidoptera;Maniola jurtina;NA;0.001;Maniola jurtina;0.939220105860875;  
BIBSA1938-19;Lepidoptera;Pyronia tithonus;Pyronia tithonus;1;Pyronia tithonus;1;  
BIBSA1939-19;Lepidoptera;Pyronia tithonus;Pyronia tithonus;1;Pyronia tithonus;0.99999999999972;  
BIBSA1940-19;Lepidoptera;Callophrys rubi;NA;0.009;Callophrys rubi;0.996682294679977;  
BIBSA1942-19;Lepidoptera;Aricia agestis;NA;0.231;Aricia agestis;0.992802054683313;  
BIBSA1943-19;Lepidoptera;Aricia agestis;NA;NA;Aricia agestis;0.999226097983055;  
BIBSA1944-19;Lepidoptera;Aricia agestis;NA;0.081;Aricia agestis;0.999290860039936;  
BIBSA1945-19;Lepidoptera;Cupido argiades;NA;0.499;NA;0.99999999984682;  
BIBSA1946-19;Lepidoptera;Cupido argiades;NA;0.499;NA;0.99999999984682;  
BIBSA1947-19;Lepidoptera;Thymelicus acteon;Thymelicus acteon;1;Thymelicus  
acteon;0.999999998066187;  
BIBSA1948-19;Lepidoptera;Thymelicus acteon;Thymelicus acteon;1;Thymelicus  
acteon;0.99999999752248;  
BIBSA1949-19;Lepidoptera;Thymelicus acteon;Thymelicus acteon;1;Thymelicus  
acteon;0.999999998099099;  
BIBSA1950-19;Lepidoptera;Heteropterus morpheus;Heteropterus morpheus;1;Heteropterus  
morpheus;0.999999999999687;  
BIBSA1951-19;Lepidoptera;Heteropterus morpheus;NA;NA;Heteropterus morpheus;0.99999999999943;  
BIBSA1952-19;Lepidoptera;Coenonympha pamphilus;Coenonympha pamphilus;1;Coenonympha  
pamphilus;0.999999999999886;  
BIBSA1953-19;Lepidoptera;Coenonympha pamphilus;Coenonympha pamphilus;1;Coenonympha  
pamphilus;0.999999999999886;  
BIBSA1961-19;Lepidoptera;Polyommatus icarus;NA;0.002;Polyommatus icarus;0.998485237110805;  
BIBSA1962-19;Lepidoptera;Lasiommata megera;Lasiommata megera;1;Lasiommata  
megera;0.999937484427266;  
BIBSA1963-19;Lepidoptera;Ochlodes sylvanus;NA;0.003;Ochlodes sylvanus;0.995120982651897;  
BIBSA1964-19;Lepidoptera;Vanessa atalanta;Vanessa atalanta;1;Vanessa atalanta;0.999999999757762;  
BIBSA1965-19;Lepidoptera;Colias crocea;NA;NA;NA;0.99999999999584;  
BIBSA1966-19;Lepidoptera;Pararge aegeria;Pararge aegeria;1;Pararge aegeria;0.999999999963165;  
BIBSA1967-19;Lepidoptera;Maniola jurtina;NA;0.001;Maniola jurtina;0.901401754054888;  
BIBSA1968-19;Lepidoptera;Maniola jurtina;NA;0.006;Maniola jurtina;0.941584460807617;  
BIBSA1969-19;Lepidoptera;Polyommatus icarus;NA;0.002;Polyommatus icarus;0.998502314961965;  
BIBSA1970-19;Lepidoptera;Polyommatus icarus;NA;0.005;Polyommatus icarus;0.971371333533657;  
BIBSA1971-19;Lepidoptera;Lasiommata megera;Lasiommata megera;1;Lasiommata  
megera;0.999928528239676;  
BIBSA1972-19;Lepidoptera;Lasiommata megera;Lasiommata megera;1;Lasiommata  
megera;0.999945664728349;

BIBSA1974-19;Lepidoptera;Pyronia tithonus;Pyronia tithonus;1;Pyronia tithonus;1;  
 BIBSA1975-19;Lepidoptera;Pararge aegeria;Pararge aegeria;1;Pararge aegeria;0.99999999963165;  
 BIBSA1976-19;Lepidoptera;Pararge aegeria;Pararge aegeria;1;Pararge aegeria;0.99999999953738;  
 BIBSA1977-19;Lepidoptera;Coenonympha pamphilus;Coenonympha pamphilus;1;Coenonympha  
 pamphilus;0.99999999999886;  
 BIBSA1978-19;Lepidoptera;Coenonympha pamphilus;Coenonympha pamphilus;1;Coenonympha  
 pamphilus;0.99999999999886;  
 BIBSA1981-19;Lepidoptera;Argynnis paphia;Argynnis paphia;1;Argynnis paphia;0.999999991389927;  
 BIBSA1983-19;Lepidoptera;Thymelicus acteon;Thymelicus acteon;1;Thymelicus  
 acteon;0.9999999752248;  
 BIBSA1984-19;Lepidoptera;Thymelicus acteon;Thymelicus acteon;1;Thymelicus  
 acteon;0.9999999752248;  
 BIBSA1985-19;Lepidoptera;Hipparchia semele;NA;0.002;Hipparchia semele;0.767063813608107;  
 BIBSA1986-19;Lepidoptera;Hipparchia semele;NA;0.004;Hipparchia semele;0.748325879155071;  
 BIBSA1987-19;Lepidoptera;Aricia agestis;NA;0.067;Aricia agestis;0.999509743227786;  
 BIBSA1988-19;Lepidoptera;Aricia agestis;NA;NA;Aricia agestis;0.998706664933933;  
 BIBSA1989-19;Lepidoptera;Polyommatus icarus;NA;0.001;Polyommatus icarus;0.981285528541973;  
 BIBSA1991-19;Lepidoptera;Thymelicus acteon;Thymelicus acteon;1;Thymelicus  
 acteon;0.9999999752248;  
 BIBSA1992-19;Lepidoptera;Lycaena phlaeas;Lycaena phlaeas;1;Lycaena phlaeas;0.999999997146887;  
 BIBSA1993-19;Lepidoptera;Coenonympha pamphilus;Coenonympha pamphilus;1;Coenonympha  
 pamphilus;0.99999999921442;  
 BIBSA1994-19;Lepidoptera;Maniola jurtina;NA;NA;NA;0.9999999985062;  
 BIBSA1995-19;Lepidoptera;Thymelicus lineola;Thymelicus lineola;1;Thymelicus  
 lineola;0.999990451952522;  
 BIBSA2012-19;Lepidoptera;Erynnis tages;Erynnis tages;1;Erynnis tages;0.999997762421119;  
 BIBSA2013-19;Lepidoptera;Polygonia c-album;NA;0.215;NA;0.999999192918557;  
 BIBSA2014-19;Lepidoptera;Cupido alcetas;NA;0.068;Cupido alcetas;0.88988907876118;  
 BIBSA2015-19;Lepidoptera;Pieris napi;NA;0.008;Pieris napi;0.840314219469586;  
 BIBSA2016-19;Lepidoptera;Colias crocea;NA;0.059;NA;0.99999999999738;  
 BIBSA2019-19;Lepidoptera;Lampides boeticus;Lampides boeticus;1;Lampides  
 boeticus;0.99999999545906;  
 BIBSA2021-19;Lepidoptera;Colias crocea;NA;0.059;NA;0.99999999999738;  
 BIBSA2025-19;Lepidoptera;Lampides boeticus;Lampides boeticus;1;Lampides  
 boeticus;0.99999999545906;  
 BIBSA2026-19;Lepidoptera;Colias crocea;NA;0.059;NA;0.99999999999738;  
 BIBSA2027-19;Lepidoptera;Colias crocea;NA;0.059;NA;0.99999999999738;  
 BIBSA2028-19;Lepidoptera;Lampides boeticus;Lampides boeticus;1;Lampides  
 boeticus;0.99999999545906;  
 BIBSA2030-19;Lepidoptera;Polyommatus thersites;Polyommatus icarus;0.001;Polyommatus  
 icarus;0.999851522482238;  
 BIBSA2032-19;Lepidoptera;Polygonia egea;Polygonia egea;1;Polygonia egea;0.999999758078475;  
 BIBSA2033-19;Lepidoptera;Gonepteryx rhamni;NA;0.192;Gonepteryx rhamni;0.991002175992451;  
 BIBSA2034-19;Lepidoptera;Lasiommata maera;Lasiommata maera;1;Lasiommata maera;0.99999510792253;  
 BIBSA2035-19;Lepidoptera;Thymelicus acteon;Thymelicus acteon;1;Thymelicus  
 acteon;0.9999999752248;  
 BIBSA2038-19;Lepidoptera;Pyronia cecilia;Pyronia cecilia;1;Pyronia cecilia;0.99999999999943;  
 BIBSA2039-19;Lepidoptera;Polyommatus amandus;Polyommatus amandus;0.002;Polyommatus  
 amandus;0.99998879592523;  
 BIBSA2040-19;Lepidoptera;Polyommatus escheri;Polyommatus escheri;1;Polyommatus  
 escheri;0.99999995379966;  
 BIBSA2041-19;Lepidoptera;Plebejus idas;NA;0.004;NA;0.999605698719885;  
 BIBSA2042-19;Lepidoptera;Cupido osiris;Cupido osiris;1;Cupido osiris;0.999999791352473;  
 BIBSA2044-19;Lepidoptera;Callophrys rubi;NA;0.019;Callophrys rubi;0.998201459637982;  
 BIBSA2045-19;Lepidoptera;Thymelicus lineola;Thymelicus lineola;1;Thymelicus  
 lineola;0.999988258187826;  
 BIBSA2047-19;Lepidoptera;Lampides boeticus;Lampides boeticus;1;Lampides  
 boeticus;0.99999999545906;  
 BIBSA2048-19;Lepidoptera;Lycaena phlaeas;Lycaena phlaeas;1;Lycaena phlaeas;0.99999996363186;  
 BIBSA2049-19;Lepidoptera;Colias alfacariensis;Colias alfacariensis;0.001;Colias  
 alfacariensis;0.999926026317526;  
 BIBSA2050-19;Lepidoptera;Aricia agestis;NA;NA;Aricia agestis;0.996930365249266;  
 BIBSA2052-19;Lepidoptera;Heteropterus morpheus;NA;NA;Heteropterus morpheus;0.99999999999943;  
 BIBSA2053-19;Lepidoptera;Cupido minimus;NA;0.001;Cupido minimus;0.999803920701362;  
 BIBSA2054-19;Lepidoptera;Argynnis adippe;NA;NA;Fabriciana adippe;0.946794248611187;  
 BIBSA2055-19;Lepidoptera;Satyrium acaciae;Satyrium acaciae;1;Satyrium acaciae;0.999999754684667;  
 BIBSA2056-19;Lepidoptera;Brenthis daphne;Brenthis daphne;0.006;Brenthis  
 daphne;0.984559944066479;  
 BIBSA2057-19;Lepidoptera;Aporia crataegi;NA;NA;Aporia crataegi;0.99999814099686;  
 BIBSA2058-19;Lepidoptera;Thymelicus sylvestris;Thymelicus sylvestris;1;Thymelicus  
 sylvestris;0.99999960888005;  
 BIBSA2059-19;Lepidoptera;Melitaea nevadensis;NA;0.007;Melitaea celadussa;0.857896833450963;  
 BIBSA2061-19;Lepidoptera;Satyrium ilicis;Satyrium ilicis;1;Satyrium ilicis;0.99999987901305;  
 BIBSA2062-19;Lepidoptera;Lasiommata maera;Lasiommata maera;1;Lasiommata maera;0.99999510792253;  
 BIBSA2064-19;Lepidoptera;Melitaea cinxia;Melitaea cinxia;1;Melitaea cinxia;0.99999999999631;  
 BIBSA2065-19;Lepidoptera;Melitaea didyma;Melitaea didyma;1;Melitaea didyma;0.999931198646483;  
 BIBSA2066-19;Lepidoptera;Cyranis semiargus;NA;NA;Cyranis semiargus;0.999051841766953;  
 BIBSA2067-19;Lepidoptera;Plebejus argus;NA;NA;Plebejus argus;0.977793255361976;

BIBSA2069-19;Lepidoptera;Vanessa atalanta;Vanessa atalanta;1;Vanessa atalanta;0.99999999567706;  
BIBSA2074-19;Lepidoptera;Boloria euphrosyne;Boloria euphrosyne;1;Boloria euphrosyne;0.99999665665472;  
BIBSA2075-19;Lepidoptera;Pyrgus armoricanus;Pyrgus armoricanus;1;Pyrgus armoricanus;0.999997353848817;  
BIBSA2076-19;Lepidoptera;Pyronia cecilia;Pyronia cecilia;1;Pyronia cecilia;1;  
BIBSA2078-19;Lepidoptera;Maniola jurtina;NA;0.038;NA;0.99999999999524;  
BIBSA2079-19;Lepidoptera;Coenonympha pamphilus;Coenonympha pamphilus;1;Coenonympha pamphilus;0.99999999998636;  
BIBSA2080-19;Lepidoptera;Lasiommata megera;Lasiommata megera;1;Lasiommata megera;0.999379144055441;  
BIBSA2081-19;Lepidoptera;Callophrys rubi;NA;0.019;Callophrys rubi;0.998201459637982;  
BIBSA2083-19;Lepidoptera;Anthocharis cardamines;Anthocharis cardamines;1;Anthocharis cardamines;0.99999984875757;  
BIBSA2086-19;Lepidoptera;Anthocharis cardamines;Anthocharis cardamines;1;Anthocharis cardamines;0.99999964875315;  
BIBSA2092-20;Lepidoptera;Brintesia circe;Brintesia circe;1;Brintesia circe;0.999999696306634;  
BIBSA2093-20;Lepidoptera;Issoria lathonia;Issoria lathonia;1;Issoria lathonia;0.9999999989257;  
BIBSA2094-20;Lepidoptera;Carcharodus alceae;Carcharodus alceae;0.999;Carcharodus alceae;0.99999995579515;  
BIBSA2095-20;Lepidoptera;Carcharodus alceae;Carcharodus alceae;0.999;Carcharodus alceae;0.99999996339511;  
BIBSA2096-20;Lepidoptera;Colias crocea;NA;0.024;NA;0.99999999998621;  
BIBSA2097-20;Lepidoptera;Callophrys rubi;NA;0.001;Callophrys rubi;0.998885705938309;  
BIBSA2100-20;Lepidoptera;Brintesia circe;Brintesia circe;1;Brintesia circe;0.999998734635459;  
BIBSA2102-20;Lepidoptera;Callophrys rubi;NA;0.001;Callophrys rubi;0.998885705938309;  
BIBSA2103-20;Lepidoptera;Callophrys rubi;NA;0.001;Callophrys rubi;0.998885705938309;  
BIBSA2104-20;Lepidoptera;Anthocharis cardamines;Anthocharis cardamines;1;Anthocharis cardamines;0.999999954741555;  
BIBSA2105-20;Lepidoptera;Anthocharis cardamines;Anthocharis cardamines;1;Anthocharis cardamines;0.9999997953563;  
BIBSA2106-20;Lepidoptera;Anthocharis cardamines;Anthocharis cardamines;1;Anthocharis cardamines;0.999999961354121;  
BIBSA2107-20;Lepidoptera;Charaxes jasius;Charaxes jasius;NA;Charaxes jasius;0.990397821479112;  
BIBSA2109-20;Lepidoptera;Vanessa atalanta;Vanessa atalanta;1;Vanessa atalanta;0.99999999757762;  
BIBSA2110-20;Lepidoptera;Satyrium ilicis;Satyrium ilicis;1;Satyrium ilicis;0.99999987901305;  
BIBSA2111-20;Lepidoptera;Satyrium ilicis;Satyrium ilicis;1;Satyrium ilicis;0.99999987901305;  
BIBSA2116-20;Lepidoptera;Maniola jurtina;NA;0.001;Maniola jurtina;0.939220105860875;  
BIBSA2117-20;Lepidoptera;Lycaena virgaureae;NA;0.186;Lycaena virgaureae;0.999491227342155;  
BIBSA2118-20;Lepidoptera;Melitaea diamina;NA;0.149;Melitaea diamina;0.99999996592464;  
BIBSA2119-20;Lepidoptera;Issoria lathonia;Issoria lathonia;1;Issoria lathonia;0.9999999989257;  
BIBSA2120-20;Lepidoptera;Lycaena hippothoe;NA;NA;Lycaena hippothoe;0.901524795943211;  
BIBSA2121-20;Lepidoptera;Ochlodes sylvanus;NA;0.316;Ochlodes sylvanus;0.996318754838625;  
BIBSA2122-20;Lepidoptera;Aglais urticae;NA;0.002;Aglais urticae;0.987497593219019;  
BIBSA2123-20;Lepidoptera;Aporia crataegi;NA;NA;Aporia crataegi;0.999995661287277;  
BIBSA2124-20;Lepidoptera;Boloria titania;Boloria titania;0.001;Boloria titania;0.99983358374111;  
BIBSA2125-20;Lepidoptera;Pararge aegeria;Pararge aegeria;1;Pararge aegeria;0.9999999963165;  
BIBSA2126-20;Lepidoptera;Aphantopus hyperantus;Aphantopus hyperantus;0.004;Aphantopus hyperantus;0.999598909345147;  
BIBSA2127-20;Lepidoptera;Brenthis daphne;NA;0.102;Brenthis daphne;0.717134521611551;  
BIBSA2128-20;Lepidoptera;Issoria lathonia;Issoria lathonia;1;Issoria lathonia;0.9999999989257;  
BIBSA2132-20;Lepidoptera;Euphydryas aurinia;NA;0.31;Euphydryas aurinia;0.993387708761386;  
BIBSA2134-20;Lepidoptera;Cupido argiades;NA;0.499;NA;0.99999999984682;  
BIBSA2136-20;Lepidoptera;Brenthis ino;Brenthis ino;1;Brenthis ino;0.997823940101957;  
BIBSA2137-20;Lepidoptera;Boloria selene;NA;0.275;Boloria selene;0.99999702697396;  
BIBSA2140-20;Lepidoptera;Melitaea varia;Melitaea varia;0.999;Melitaea varia;0.99999725909709;  
BIBSA2144-20;Lepidoptera;Pyrgus carthami;Pyrgus carthami;1;Pyrgus carthami;0.99998997209607;  
BIBSA2146-20;Lepidoptera;Parnassius mnemosyne;Parnassius mnemosyne;1;Parnassius mnemosyne;0.999999378711061;  
BIBSA2148-20;Lepidoptera;Coenonympha glycerion;NA;0.004;Coenonympha glycerion;0.923784712175037;  
BIBSA2149-20;Lepidoptera;Erebia pandrose;NA;NA;Erebia pandrose;0.8186015174923;  
BIBSA2150-20;Lepidoptera;Erebia pandrose;NA;NA;Erebia pandrose;0.8186015174923;  
BIBSA2152-20;Lepidoptera;Aporia crataegi;NA;NA;Aporia crataegi;0.999997860566808;  
BIBSA2154-20;Lepidoptera;Brintesia circe;Brintesia circe;1;Brintesia circe;0.99999969821626;  
BIBSA2155-20;Lepidoptera;Pararge aegeria;Pararge aegeria;1;Pararge aegeria;0.99999999963165;  
BIBSA2158-20;Lepidoptera;Ochlodes sylvanus;NA;0.316;Ochlodes sylvanus;0.996318754838625;  
BIBSA2161-20;Lepidoptera;Issoria lathonia;Issoria lathonia;1;Issoria lathonia;0.99999999967599;  
BIBSA2162-20;Lepidoptera;Melitaea didyma;Melitaea didyma;0.999;Melitaea didyma;0.999760747572586;  
BIBSA2163-20;Lepidoptera;Cupido minimus;NA;0.006;Cupido minimus;0.999768371759258;  
BIBSA2164-20;Lepidoptera;Polygonia c-album;NA;0.215;NA;0.999999192918557;  
BIBSA2165-20;Lepidoptera;Gonepteryx cleopatra;Gonepteryx cleopatra;0.998;Gonepteryx cleopatra;0.999118636582266;  
BIBSA2166-20;Lepidoptera;Maniola jurtina;NA;0.023;Maniola jurtina;0.732198397368727;  
BIBSA2167-20;Lepidoptera;Coenonympha corinna;Coenonympha corinna;1;Coenonympha corinna;0.9999999995879;  
BIBSA2168-20;Lepidoptera;Pyronia cecilia;Pyronia cecilia;1;Pyronia cecilia;0.99999999999972;

BIBSA2171-20;Lepidoptera;Polyommatus celina;NA;0.044;Polyommatus celina;0.999999994953214;  
BIBSA2173-20;Lepidoptera;Coenonympha corinna;Coenonympha corinna;1;Coenonympha  
corinna;0.999999869776141;  
BIBSA2175-20;Lepidoptera;Celastrina argiolus;Celastrina argiolus;1;Celastrina  
argiolus;0.999527385150531;  
BIBSA2177-20;Lepidoptera;Carcharodus alceae;Carcharodus alceae;1;Carcharodus  
alceae;0.99999998465938;  
BIBSA2178-20;Lepidoptera;Lampides boeticus;Lampides boeticus;1;Lampides  
boeticus;0.99999999545906;  
BIBSA2179-20;Lepidoptera;Thymelicus acteon;Thymelicus acteon;1;Thymelicus  
acteon;0.9999999752248;  
BIBSA2180-20;Lepidoptera;Pyronia cecilia;Pyronia cecilia;NA;Pyronia cecilia;1;  
BIBSA2182-20;Lepidoptera;Glaucopsyche alexis;Glaucopsyche alexis;0.001;Glaucopsyche  
alexis;0.94042380088325;  
BIBSA2183-20;Lepidoptera;Melanargia galathea;Melanargia galathea;NA;Melanargia  
galathea;0.959429932872284;  
BIBSA2184-20;Lepidoptera;Melanargia galathea;Melanargia galathea;NA;Melanargia  
galathea;0.959429932872284;  
BIBSA2190-20;Lepidoptera;Lasiommata megera;Lasiommata megera;1;Lasiommata  
megera;0.999379144055441;  
BIBSA2191-20;Lepidoptera;Lasiommata megera;Lasiommata megera;1;Lasiommata  
megera;0.999379144055441;  
BIBSA2192-20;Lepidoptera;Lasiommata megera;Lasiommata megera;1;Lasiommata  
megera;0.999379144055441;  
BIBSA2193-20;Lepidoptera;Colias crocea;NA;0.059;NA;0.99999999999738;  
BIBSA2195-20;Lepidoptera;Lasiommata megera;Lasiommata megera;1;Lasiommata  
megera;0.999928528239676;  
BIBSA2196-20;Lepidoptera;Gonepteryx cleopatra;Gonepteryx cleopatra;0.998;Gonepteryx  
cleopatra;0.999118636582266;  
BIBSA2197-20;Lepidoptera;Lasiommata paramegaera;Lasiommata paramegaera;0.999;Lasiommata  
paramegaera;0.995283446287531;  
BIBSA2198-20;Lepidoptera;Celastrina argiolus;Celastrina argiolus;1;Celastrina  
argiolus;0.999037794018796;  
BIBSA2199-20;Lepidoptera;Gonepteryx cleopatra;Gonepteryx cleopatra;0.998;Gonepteryx  
cleopatra;0.999118636582266;  
BIBSA2200-20;Lepidoptera;Coenonympha pamphilus;Coenonympha pamphilus;1;Coenonympha  
pamphilus;0.99999999999744;  
BIBSA2202-20;Lepidoptera;Colias crocea;NA;0.059;NA;0.99999999999738;  
BIBSA2203-20;Lepidoptera;Charaxes jasius;Charaxes jasius;NA;Charaxes jasius;0.990397821479112;  
BIBSA2205-20;Lepidoptera;Thymelicus sylvestris;NA;0.324;Thymelicus sylvestris;0.999940778442454;  
BIBSA2207-20;Lepidoptera;Lycaena phlaeas;Lycaena phlaeas;1;Lycaena phlaeas;0.99999996363186;  
BIBSA2209-20;Lepidoptera;Lampides boeticus;Lampides boeticus;1;Lampides  
boeticus;0.9999999876789;  
BIBSA2210-20;Lepidoptera;Celastrina argiolus;Celastrina argiolus;1;Celastrina  
argiolus;0.999527385150531;  
BIBSA2211-20;Lepidoptera;Lycaena phlaeas;Lycaena phlaeas;1;Lycaena phlaeas;0.99999996363186;  
BIBSA2212-20;Lepidoptera;Celastrina argiolus;Celastrina argiolus;1;Celastrina  
argiolus;0.999527385150531;  
BIBSA2215-20;Lepidoptera;Pyronia cecilia;Pyronia cecilia;NA;Pyronia cecilia;1;  
BIBSA2216-20;Lepidoptera;Lasiommata paramegaera;Lasiommata paramegaera;0.999;Lasiommata  
paramegaera;0.995283446287531;  
BIBSA2217-20;Lepidoptera;Lasiommata paramegaera;Lasiommata paramegaera;0.999;Lasiommata  
paramegaera;0.995283446287531;  
BIBSA2218-20;Lepidoptera;Colias crocea;NA;0.059;NA;0.99999999999738;  
BIBSA2219-20;Lepidoptera;Pyronia tithonus;Pyronia tithonus;1;Pyronia tithonus;1;  
BIBSA2220-20;Lepidoptera;Coenonympha corinna;Coenonympha corinna;1;Coenonympha  
corinna;0.99999999995879;  
BIBSA2221-20;Lepidoptera;Lampides boeticus;Lampides boeticus;1;Lampides  
boeticus;0.99999999545906;  
BIBSA2222-20;Lepidoptera;Melitaea nevadensis;NA;0.003;Melitaea celadussa;0.889046332903503;  
BIBSA2223-20;Lepidoptera;Melitaea nevadensis;NA;0.003;Melitaea celadussa;0.918635002680887;  
BIBSA2224-20;Lepidoptera;Celastrina argiolus;Celastrina argiolus;1;Celastrina  
argiolus;0.999037794018796;  
BIBSA2225-20;Lepidoptera;Colias crocea;NA;0.059;NA;0.99999999999738;  
BIBSA2228-20;Lepidoptera;Colias crocea;NA;0.059;NA;0.99999999999738;  
BIBSA2229-20;Lepidoptera;Celastrina argiolus;Celastrina argiolus;1;Celastrina  
argiolus;0.999527385150531;  
BIBSA2234-20;Lepidoptera;Pyronia cecilia;Pyronia cecilia;NA;Pyronia cecilia;0.99999999999943;  
BIBSA2245-20;Lepidoptera;Vanessa cardui;Vanessa cardui;1;Vanessa cardui;0.999999459983318;  
BIBSA2246-20;Lepidoptera;Aricia agestis;NA;0.253;Aricia agestis;0.996350017387504;  
BIBSA2248-20;Lepidoptera;Carcharodus alceae;Carcharodus alceae;1;Carcharodus  
alceae;0.99999998465938;  
BIBSA2250-20;Lepidoptera;Colias crocea;NA;0.059;NA;0.99999999999738;  
BIBSA2251-20;Lepidoptera;Pyronia cecilia;Pyronia cecilia;NA;Pyronia cecilia;0.99999999999972;  
BIBSA2252-20;Lepidoptera;Favonius quercus;NA;NA;NA;0.999999999998742;  
BIBSA2253-20;Lepidoptera;Pyronia tithonus;Pyronia tithonus;1;Pyronia tithonus;1;  
BIBSA2254-20;Lepidoptera;Pyronia tithonus;Pyronia tithonus;1;Pyronia tithonus;1;

BIBSA2255-20;Lepidoptera;Carcharodus alceae;Carcharodus alceae;0.001;Carcharodus alceae;0.99999995618566;  
BIBSA2256-20;Lepidoptera;Pyrgus armoricanus;Pyrgus armoricanus;1;Pyrgus armoricanus;0.999997353848817;  
BIBSA2257-20;Lepidoptera;Lampides boeticus;Lampides boeticus;1;Lampides boeticus;0.9999999876789;  
BIBSA2258-20;Lepidoptera;Iphiclides podalirius;NA;0.313;Iphiclides podalirius;0.889198863100098;  
BIBSA2259-20;Lepidoptera;Polygonia c-album;NA;0.215;NA;0.999999192918557;  
BIBSA2261-20;Lepidoptera;Hipparchia neomiris;Hipparchia neomiris;1;Hipparchia neomiris;0.99999999998977;  
BIBSA2262-20;Lepidoptera;Hipparchia aristaeus;Hipparchia aristaeus;1;Hipparchia aristaeus;0.99999889765866;  
BIBSA2266-20;Lepidoptera;Coenonympha corinna;Coenonympha corinna;1;Coenonympha corinna;0.99999999975955;  
BIBSA2268-20;Lepidoptera;Anthocharis cardamines;Anthocharis cardamines;1;Anthocharis cardamines;0.99999961354121;  
BIBSA2270-20;Lepidoptera;Pyrgus armoricanus;Pyrgus armoricanus;1;Pyrgus armoricanus;0.999997353848817;  
BIBSA2271-20;Lepidoptera;Iphiclides podalirius;NA;0.302;Iphiclides podalirius;0.931082412606632;  
BIBSA2272-20;Lepidoptera;Coenonympha pamphilus;Coenonympha pamphilus;1;Coenonympha pamphilus;0.99999999999744;  
BIBSA2273-20;Lepidoptera;Aricia agestis;NA;0.253;Aricia agestis;0.996350017387504;  
BIBSA2274-20;Lepidoptera;Pararge aegeria;Pararge aegeria;1;Pararge aegeria;0.999999999963165;  
BIBSA2275-20;Lepidoptera;Celastrina argiolus;Celastrina argiolus;1;Celastrina argiolus;0.999527385150531;  
BIBSA2282-20;Lepidoptera;Colias crocea;NA;0.059;NA;0.99999999999738;  
BIBSA2284-20;Lepidoptera;Lasiommata megera;Lasiommata megera;1;Lasiommata megera;0.999379144055441;  
BIBSA2285-20;Lepidoptera;Colias crocea;NA;0.059;NA;0.99999999999738;  
BIBSA2286-20;Lepidoptera;Colias crocea;NA;0.059;NA;0.99999999999738;  
BIBSA2287-20;Lepidoptera;Lampides boeticus;Lampides boeticus;1;Lampides boeticus;0.999999999690317;  
BIBSA2288-20;Lepidoptera;Lampides boeticus;Lampides boeticus;1;Lampides boeticus;0.999999999690317;  
BIBSA2289-20;Lepidoptera;Celastrina argiolus;Celastrina argiolus;1;Celastrina argiolus;0.999527385150531;  
BIBSA2291-20;Lepidoptera;Lasiommata megera;Lasiommata megera;1;Lasiommata megera;0.999379144055441;  
BIBSA2293-20;Lepidoptera;Anthocharis cardamines;Anthocharis cardamines;1;Anthocharis cardamines;0.999999984567239;  
BIBSA2294-20;Lepidoptera;Aricia agestis;NA;0.253;Aricia agestis;0.996350017387504;  
BIBSA2295-20;Lepidoptera;Thymelicus acteon;Thymelicus acteon;1;Thymelicus acteon;0.99999999752248;  
BIBSA2296-20;Lepidoptera;Pararge aegeria;Pararge aegeria;1;Pararge aegeria;0.999999999963165;  
BIBSA2298-20;Lepidoptera;Satyrium w-album;NA;0.1;Satyrium w-album;0.979163594724737;  
BIBSA2299-20;Lepidoptera;Polygonia c-album;NA;0.215;NA;0.999999192918557;  
BIBSA2301-20;Lepidoptera;Pararge aegeria;Pararge aegeria;1;Pararge aegeria;0.99999999850246;  
BIBSA2302-20;Lepidoptera;Erebia mnestra;Erebia mnestra;0.002;Erebia mnestra;0.999916977821046;  
BIBSA2306-20;Lepidoptera;Agriades glandon;NA;0.001;Agriades glandon;0.986645583198728;  
BIBSA2307-20;Lepidoptera;Erebia epiphron;Erebia epiphron;NA;Erebia epiphron;0.998243429957028;  
BIBSA2310-20;Lepidoptera;Melitaea nevadensis;Melitaea parthenoides;1;Melitaea parthenoides;0.999999993530452;  
BIBSA2312-20;Lepidoptera;Colias crocea;NA;0.059;NA;0.99999999999738;  
BIBSA2316-20;Lepidoptera;Celastrina argiolus;Celastrina argiolus;1;Celastrina argiolus;0.999527385150531;  
BIBSA2317-20;Lepidoptera;Colias crocea;NA;0.059;NA;0.99999999999738;  
BIBSA2318-20;Lepidoptera;Pyronia cecilia;Pyronia cecilia;1;Pyronia cecilia;1;  
BIBSA2320-20;Lepidoptera;Chazara briseis;Chazara briseis;0.004;Chazara briseis;0.999942158527271;  
BIBSA2322-20;Lepidoptera;Anthocharis cardamines;Anthocharis cardamines;1;Anthocharis cardamines;0.99999988534341;  
BIBSA2323-20;Lepidoptera;Colias crocea;NA;0.021;NA;0.99999999999351;  
BIBSA2327-20;Lepidoptera;Gonepteryx cleopatra;Gonepteryx cleopatra;0.998;Gonepteryx cleopatra;0.999118636582266;  
BIBSA2328-20;Lepidoptera;Vanessa cardui;Vanessa cardui;1;Vanessa cardui;0.999999459983318;  
BIBSA2329-20;Lepidoptera;Plebejus idas;NA;0.001;NA;0.994620093546684;  
BIBSA2333-20;Lepidoptera;Lasiommata megera;Lasiommata megera;1;Lasiommata megera;0.997946594306567;  
BIBSA2334-20;Lepidoptera;Issoria lathonia;Issoria lathonia;1;Issoria lathonia;0.99999999989257;  
BIBSA2335-20;Lepidoptera;Satyrium ilicis;Satyrium ilicis;1;Satyrium ilicis;0.999999987901305;  
BIBSA2336-20;Lepidoptera;Thymelicus sylvestris;NA;0.324;Thymelicus sylvestris;0.999940778442454;  
BIBSA2338-20;Lepidoptera;Pararge aegeria;Pararge aegeria;1;Pararge aegeria;0.999999999963165;  
BIBSA2342-20;Lepidoptera;Issoria lathonia;Issoria lathonia;1;Issoria lathonia;0.99999999989257;  
BIBSA2344-20;Lepidoptera;Polyommatus celina;Polyommatus celina;0.009;Polyommatus celina;0.99999999739714;  
BIBSA2345-20;Lepidoptera;Gonepteryx cleopatra;Gonepteryx cleopatra;0.998;Gonepteryx cleopatra;0.999118636582266;  
BIBSA2346-20;Lepidoptera;Lycaena tityrus;Lycaena tityrus;1;Lycaena tityrus;0.999998928238034;

BIBSA2347-20;Lepidoptera;Callophrys rubi;NA;0.001;Callophrys rubi;0.99870518510598;  
BIBSA2348-20;Lepidoptera;Pararge aegeria;Pararge aegeria;1;Pararge aegeria;0.999999999963165;  
BIBSA2349-20;Lepidoptera;Gonepteryx cleopatra;Gonepteryx cleopatra;0.969;Gonepteryx  
cleopatra;0.998560379901668;  
BIBSA2352-20;Lepidoptera;Polyommatus icarus;NA;0.001;Polyommatus icarus;0.981285528541973;  
BIBSA2354-20;Lepidoptera;Lasiommata megera;Lasiommata megera;1;Lasiommata  
megera;0.999928528239676;  
BIBSA2355-20;Lepidoptera;Anthocharis cardamines;Anthocharis cardamines;0.001;Anthocharis  
cardamines;0.999999939290634;  
BIBSA2357-20;Lepidoptera;Satyrium ilicis;Satyrium ilicis;1;Satyrium ilicis;0.999999987901305;  
BIBSA2358-20;Lepidoptera;Pyrgus malvoides;NA;0.176;Pyrgus malvoides;0.940490890379026;  
BIBSA2359-20;Lepidoptera;Lampides boeticus;Lampides boeticus;1;Lampides  
boeticus;0.99999999545906;  
BIBSA2360-20;Lepidoptera;Lasiommata megera;Lasiommata megera;1;Lasiommata  
megera;0.999379144055441;  
BIBSA2361-20;Lepidoptera;Lasiommata megera;Lasiommata megera;1;Lasiommata  
megera;0.999379144055441;  
BIBSA2362-20;Lepidoptera;Lasiommata megera;Lasiommata megera;1;Lasiommata  
megera;0.999379144055441;  
BIBSA2365-20;Lepidoptera;Hipparchia fagi;NA;NA;Hipparchia fagi;0.984048543688953;  
BIBSA2366-20;Lepidoptera;Cupido argiades;NA;0.499;NA;0.99999999984682;  
BIBSA2368-20;Lepidoptera;Pyrgus armoricanus;Pyrgus armoricanus;1;Pyrgus  
armoricanus;0.999997353848817;  
BIBSA2370-20;Lepidoptera;Erebia oeme;NA;0.002;Erebia medusa;0.991052367627986;  
BIBSA2373-20;Lepidoptera;Lasiommata megera;Lasiommata megera;1;Lasiommata  
megera;0.999379144055441;  
BIBSA2374-20;Lepidoptera;Pararge aegeria;Pararge aegeria;1;Pararge aegeria;0.999999999963165;  
BIBSA2376-20;Lepidoptera;Polyommatus dolus;NA;0.001;Polyommatus dolus;0.945161985609982;  
BIBSA2377-20;Lepidoptera;Pyrgus armoricanus;Pyrgus armoricanus;1;Pyrgus  
armoricanus;0.999997353848817;  
BIBSA2378-20;Lepidoptera;Polyommatus thersites;Polyommatus thersites;0.001;Polyommatus  
thersites;0.999999883559219;  
BIBSA2379-20;Lepidoptera;Polyommatus daphnis;Polyommatus daphnis;1;Polyommatus  
daphnis;0.999949599958755;  
BIBSA2381-20;Lepidoptera;Lycaena virgaureae;NA;0.209;Lycaena virgaureae;0.999669745100572;  
BIBSA2383-20;Lepidoptera;Gonepteryx cleopatra;Gonepteryx cleopatra;0.998;Gonepteryx  
cleopatra;0.999118636582266;  
BIBSA2385-20;Lepidoptera;Colias crocea;NA;0.059;NA;0.99999999999738;  
BIBSA2386-20;Lepidoptera;Colias crocea;NA;0.059;NA;0.99999999999738;  
BIBSA2389-20;Lepidoptera;Vanessa cardui;Vanessa cardui;1;Vanessa cardui;0.999999459983318;  
BIBSA2391-20;Lepidoptera;Charaxes jasius;Charaxes jasius;0.001;Charaxes  
jasius;0.988304809129503;  
BIBSA2395-20;Lepidoptera;Hipparchia neapolitana;NA;0.004;Hipparchia semele;0.780671715710997;  
BIBSA2396-20;Lepidoptera;Hipparchia neapolitana;NA;0.001;NA;0.99999999999843;  
BIBSA2399-20;Lepidoptera;Colias crocea;NA;0.059;NA;0.99999999999738;  
BIBSA2400-20;Lepidoptera;Colias crocea;NA;0.059;NA;0.99999999999738;  
BIBSA2404-20;Lepidoptera;Lycaena phlaeas;Lycaena phlaeas;1;Lycaena phlaeas;0.99999996363186;  
BIBSA2405-20;Lepidoptera;Lycaena phlaeas;Lycaena phlaeas;1;Lycaena phlaeas;0.99999996363186;  
BIBSA2407-20;Lepidoptera;Hipparchia fagi;NA;NA;Hipparchia fagi;0.959251275816445;  
BIBSA2408-20;Lepidoptera;Lycaena phlaeas;Lycaena phlaeas;1;Lycaena phlaeas;0.99999996363186;  
BIBSA2412-20;Lepidoptera;Vanessa atalanta;Vanessa atalanta;1;Vanessa atalanta;0.9999999669399;  
BIBSA2415-20;Lepidoptera;Lampides boeticus;Lampides boeticus;1;Lampides  
boeticus;0.99999999690317;  
BIBSA2416-20;Lepidoptera;Lampides boeticus;Lampides boeticus;1;Lampides  
boeticus;0.99999999455639;  
BIBSA2419-20;Lepidoptera;Polyommatus icarus;Polyommatus icarus;0.001;Polyommatus  
icarus;0.999851522482238;  
BIBSA2420-20;Lepidoptera;Vanessa atalanta;Vanessa atalanta;1;Vanessa atalanta;0.99999999410704;  
BIBSA2421-20;Lepidoptera;Vanessa cardui;Vanessa cardui;1;Vanessa cardui;0.99999850530696;  
BIBSA2427-20;Lepidoptera;Colias crocea;NA;0.059;NA;0.99999999999738;  
BIBSA2428-20;Lepidoptera;Colias crocea;NA;0.006;NA;0.99999999999492;  
BIBSA2429-20;Lepidoptera;Gonepteryx cleopatra;Gonepteryx cleopatra;1;Gonepteryx  
cleopatra;0.996726219900688;  
BIBSA2430-20;Lepidoptera;Lampides boeticus;Lampides boeticus;1;Lampides  
boeticus;0.99999999545906;  
BIBSA2431-20;Lepidoptera;Lampides boeticus;Lampides boeticus;1;Lampides  
boeticus;0.99999999545906;  
BIBSA2439-20;Lepidoptera;Thecla betulae;Thecla betulae;1;Thecla betulae;0.99999999972886;  
BIBSA2440-20;Lepidoptera;Satyrium w-album;NA;0.056;Satyrium w-album;0.989378230996316;  
BIBSA2441-20;Lepidoptera;Apatura ilia;NA;0.165;Apatura ilia;0.956796812031481;  
BIBSA2442-20;Lepidoptera;Lycaena virgaureae;NA;0.209;Lycaena virgaureae;0.999669745100572;  
BIBSA2443-20;Lepidoptera;Satyrium w-album;NA;0.183;Satyrium w-album;0.94958214537494;  
BIBSA2447-20;Lepidoptera;Erebia pandrose;NA;NA;Erebia pandrose;0.8186015174923;  
BIBSA2448-20;Lepidoptera;Erebia meolans;NA;NA;Erebia meolans;0.998020712377682;  
BIBSA2449-20;Lepidoptera;Parnassius mnemosyne;Parnassius mnemosyne;1;Parnassius  
mnemosyne;0.999999378711061;  
BIBSA2453-20;Lepidoptera;Polyommatus daphnis;Polyommatus daphnis;1;Polyommatus  
daphnis;0.999937221723078;

BIBSA2454-20;Lepidoptera;Erebia meolans;Erebia meolans;NA;Erebia meolans;0.997425474109132;  
BIBSA2456-20;Lepidoptera;Issoria lathonia;Issoria lathonia;1;Issoria lathonia;0.99999999989257;  
BIBSA2458-20;Lepidoptera;Carcharodus lavatherae;NA;0.333;Carcharodus  
lavatherae;0.99839243348919;  
BIBSA2459-20;Lepidoptera;Polygonia egea;Polygonia egea;1;Polygonia egea;0.999999758078475;  
BIBSA2460-20;Lepidoptera;Favonius quercus;NA;NA;NA;0.99999999998728;  
BIBSA2461-20;Lepidoptera;Hipparchia fagi;NA;NA;Hipparchia fagi;0.952646862594835;  
BIBSA2463-20;Lepidoptera;Parnassius mnemosyne;Parnassius mnemosyne;1;Parnassius  
mnemosyne;0.9999989662036;  
BIBSA2465-20;Lepidoptera;Melitaea diamina;Melitaea diamina;0.001;Melitaea  
diamina;0.999999991551789;  
BIBSA2466-20;Lepidoptera;Polyommatus thersites;NA;0.824;Polyommatus thersites;0.999999764108565;  
BIBSA2469-20;Lepidoptera;Cupido minimus;NA;0.009;Cupido minimus;0.998365728131086;  
BIBSA2470-20;Lepidoptera;Argynnis adippe;NA;NA;Fabriciana adippe;0.922280384106682;  
BIBSA2472-20;Lepidoptera;Erebia meolans;Erebia meolans;NA;Erebia meolans;0.997425474109132;  
BIBSA2474-20;Lepidoptera;Erebia neoridas;NA;NA;Erebia neoridas;0.987404576493131;  
BIBSA2475-20;Lepidoptera;Erebia meolans;Erebia meolans;0.993;Erebia meolans;0.996967089964336;  
BIBSA2480-20;Lepidoptera;Erebia pluto;Erebia gorge;1;Erebia gorge;0.99999998936204;  
BIBSA2482-20;Lepidoptera;Erebia pluto;Erebia pluto;1;Erebia pluto;0.999999186851643;  
BIBSA2483-20;Lepidoptera;Erebia pluto;Erebia pluto;1;Erebia pluto;0.9999995980348;  
BIBSA2489-20;Lepidoptera;Erebia meolans;Erebia meolans;NA;Erebia meolans;0.999880195584624;  
BIBSA2491-20;Lepidoptera;Erebia meolans;NA;0.489;Erebia meolans;0.972815650293517;  
BIBSA2496-20;Lepidoptera;Erebia pluto;Erebia pluto;1;Erebia pluto;0.999999419144556;  
BIBSA2497-20;Lepidoptera;Erebia pluto;Erebia pluto;1;Erebia pluto;0.999999419144556;  
BIBSA2499-20;Lepidoptera;Erebia pluto;Erebia pluto;1;Erebia pluto;0.999999419144556;  
BIBSA2509-20;Lepidoptera;Erebia meolans;Erebia meolans;1;Erebia meolans;0.999164444873577;  
BIBSA2510-20;Lepidoptera;Erebia epiphron;NA;NA;Erebia epiphron;0.997605378796729;  
BIBSA2514-20;Lepidoptera;Erebia meolans;Erebia meolans;1;Erebia meolans;0.999231432693854;  
BIBSA2516-20;Lepidoptera;Erebia epiphron;NA;NA;Erebia epiphron;0.9975214976346;  
BIBSA2517-20;Lepidoptera;Erebia epiphron;NA;NA;Erebia epiphron;0.997527149345302;  
BIBSA2523-20;Lepidoptera;Erebia meolans;Erebia meolans;1;Erebia meolans;0.999231432693854;  
BIBSA2524-20;Lepidoptera;Erebia meolans;NA;NA;Erebia neoridas;0.985497901839785;  
BIBSA2525-20;Lepidoptera;Erebia neoridas;NA;NA;Erebia neoridas;0.994117947216123;  
BIBSA2526-20;Lepidoptera;Erebia neoridas;NA;NA;Erebia neoridas;0.994117947216123;  
BIBSA2527-20;Lepidoptera;Erebia neoridas;NA;NA;Erebia neoridas;0.987404576493131;  
BIBSA2528-20;Lepidoptera;Erebia neoridas;NA;NA;Erebia neoridas;0.994117947216123;  
BIBSA2529-20;Lepidoptera;Erebia neoridas;NA;NA;Erebia neoridas;0.994117947216123;  
BIBSA2530-20;Lepidoptera;Erebia neoridas;NA;NA;Erebia neoridas;0.994117947216123;  
BIBSA2532-20;Lepidoptera;Erebia neoridas;NA;NA;Erebia neoridas;0.99150073021036;  
BIBSA2533-20;Lepidoptera;Erebia neoridas;NA;NA;Erebia neoridas;0.994117947216123;  
BIBSA2536-20;Lepidoptera;Carcharodus alceae;Carcharodus alceae;0.999;Carcharodus  
alceae;0.999999996339511;  
BIBSA2537-20;Lepidoptera;Colias crocea;NA;0.059;NA;0.99999999999738;  
BIBSA2538-20;Lepidoptera;Pyronia tithonus;Pyronia tithonus;1;Pyronia tithonus;1;  
BIBSA2539-20;Lepidoptera;Gonepteryx rhamni;NA;0.194;Gonepteryx rhamni;0.99583141915324;  
BIBSA2540-20;Lepidoptera;Pararge aegeria;Pararge aegeria;1;Pararge aegeria;0.99999999958789;  
BIBSA2542-20;Lepidoptera;Papilio machaon;Papilio machaon;0.003;Papilio  
machaon;0.999482752749035;  
BIBSA2544-20;Lepidoptera;Vanessa cardui;Vanessa cardui;1;Vanessa cardui;0.999999459983318;  
BIBSA2548-20;Lepidoptera;Gonepteryx cleopatra;Gonepteryx cleopatra;0.998;Gonepteryx  
cleopatra;0.999118636582266;  
BIBSA2549-20;Lepidoptera;Gonepteryx cleopatra;Gonepteryx cleopatra;0.998;Gonepteryx  
cleopatra;0.999118636582266;  
BIBSA2550-20;Lepidoptera;Gonepteryx cleopatra;Gonepteryx cleopatra;0.998;Gonepteryx  
cleopatra;0.999118636582266;  
BIBSA2554-20;Lepidoptera;Thymelicus acteon;Thymelicus acteon;1;Thymelicus  
acteon;0.99999999752248;  
BIBSA2556-20;Lepidoptera;Papilio machaon;Papilio machaon;0.003;Papilio  
machaon;0.999482752749035;  
BIBSA2559-20;Lepidoptera;Celastrina argiolus;Celastrina argiolus;1;Celastrina  
argiolus;0.999037794018796;  
BIBSA2560-20;Lepidoptera;Colias crocea;NA;0.059;NA;0.99999999999738;  
BIBSA2562-20;Lepidoptera;Lampides boeticus;Lampides boeticus;1;Lampides  
boeticus;0.999999999545906;  
BIBSA2563-20;Lepidoptera;Hipparchia neomiris;Hipparchia neomiris;1;Hipparchia  
neomiris;0.99999999998977;  
BIBSA2565-20;Lepidoptera;Charaxes jasius;Charaxes jasius;NA;Charaxes jasius;0.990397821479112;  
BIBSA2566-20;Lepidoptera;Hipparchia aristaeus;Hipparchia aristaeus;1;Hipparchia  
aristaeus;0.999999943814517;  
BIBSA2568-20;Lepidoptera;Hipparchia aristaeus;Hipparchia aristaeus;1;Hipparchia  
aristaeus;0.99999993824275;  
BIBSA2570-20;Lepidoptera;Lasioommata megera;Lasioommata megera;1;Lasioommata  
megera;0.999379144055441;  
BIBSA2571-20;Lepidoptera;Argynnis paphia;Argynnis paphia;1;Argynnis paphia;0.999999992970402;  
BIBSA2572-20;Lepidoptera;Melitaea didyma;Melitaea didyma;1;Melitaea didyma;0.999945816868155;  
BIBSA2573-20;Lepidoptera;Gegenes nostrodamus;Gegenes nostrodamus;1;Gegenes  
nostrodamus;0.999999996883645;



BIBSA2576-20;Lepidoptera;Gonepteryx cleopatra;Gonepteryx cleopatra;0.998;Gonepteryx cleopatra;0.999118636582266;  
BIBSA2577-20;Lepidoptera;Erebia neoridas;NA;NA;Erebia neoridas;0.997112686054603;  
BIBSA2578-20;Lepidoptera;Erebia neoridas;NA;NA;Erebia neoridas;0.997112686054603;  
BIBSA2579-20;Lepidoptera;Erebia montana;Erebia montana;1;Erebia montana;0.99978250115925;  
BIBSA2580-20;Lepidoptera;Erebia neoridas;NA;NA;Erebia neoridas;0.990464121514464;  
BIBSA2581-20;Lepidoptera;Erebia medusa;NA;0.009;Erebia medusa;0.986275612856827;  
BIBSA2582-20;Lepidoptera;Erebia medusa;NA;0.009;Erebia medusa;0.986275612856827;  
BIBSA2583-20;Lepidoptera;Erebia medusa;NA;0.009;Erebia medusa;0.986275612856827;  
BIBSA2584-20;Lepidoptera;Erebia pandrose;Erebia pandrose;NA;Erebia pandrose;0.956509272964271;  
BIBSA2585-20;Lepidoptera;Erebia meolans;Erebia meolans;1;Erebia meolans;0.999164444873577;  
BIBSA2590-20;Lepidoptera;Erebia epiphron;Erebia epiphron;NA;Erebia epiphron;0.997087969435667;  
BIBSA2592-20;Lepidoptera;Erebia neoridas;Erebia neoridas;NA;Erebia neoridas;0.998631936578793;  
BIBSA2594-20;Lepidoptera;Erebia neoridas;NA;NA;Erebia neoridas;0.994368810769763;  
BIBSA2595-20;Lepidoptera;Erebia medusa;NA;0.009;Erebia medusa;0.986275612856827;  
BIBSA2598-20;Lepidoptera;Erebia pandrose;Erebia pandrose;0.013;Erebia pandrose;0.974388092470716;  
BIBSA2599-20;Lepidoptera;Erebia neoridas;Erebia neoridas;NA;Erebia neoridas;0.998631936578793;  
BIBSA2600-20;Lepidoptera;Erebia neoridas;Erebia neoridas;NA;Erebia neoridas;0.998631936578793;  
BIBSA2601-20;Lepidoptera;Erebia epiphron;Erebia epiphron;NA;Erebia epiphron;0.997087969435667;  
BIBSA2602-20;Lepidoptera;Erebia montana;Erebia montana;1;Erebia montana;0.999855571743067;  
BIBSA2603-20;Lepidoptera;Erebia epiphron;Erebia epiphron;NA;Erebia epiphron;0.998243429957028;  
BIBSA2604-20;Lepidoptera;Erebia pluto;Erebia pluto;1;Erebia pluto;0.9999996335028;  
BIBSA2605-20;Lepidoptera;Erebia epiphron;NA;NA;Erebia epiphron;0.997605378796729;  
BIBSA2608-20;Lepidoptera;Erebia montana;Erebia montana;1;Erebia montana;0.999047244700624;  
BIBSA2609-20;Lepidoptera;Erebia montana;Erebia montana;1;Erebia montana;0.999047244700624;  
BIBSA2614-20;Lepidoptera;Erebia montana;Erebia montana;1;Erebia montana;0.99905080170195;  
BIBSA2616-20;Lepidoptera;Erebia pandrose;Erebia pandrose;0.003;Erebia pandrose;0.993608645577247;  
BIBSA2617-20;Lepidoptera;Erebia oeme;NA;0.096;Erebia oeme;0.99999999806249;  
BIBSA2619-20;Lepidoptera;Erebia epiphron;NA;NA;Erebia epiphron;0.98984833968802;  
BIBSA2626-20;Lepidoptera;Erebia neoridas;NA;NA;Erebia neoridas;0.97412860899077;  
BIBSA2627-20;Lepidoptera;Erebia meolans;Erebia meolans;NA;Erebia meolans;0.999835953426128;  
BIBSA2628-20;Lepidoptera;Erebia montana;Erebia montana;1;Erebia montana;0.999855571743067;  
BIBSA2696-21;Lepidoptera;Brenthis hecate;NA;0.072;Brenthis hecate;0.999803056289114;  
BIBSA2709-21;Lepidoptera;Polygonia egea;Polygonia egea;1;Polygonia egea;0.999999903367585;  
BIBSA437-15;Lepidoptera;Coenonympha arcania;NA;0.091;Coenonympha arcania;0.908376923930217;  
CM002851.1;Lepidoptera;Melitaea cinxia;NA;0.324;Melitaea cinxia;0.99999999995623;  
DMAZ107-09;Lepidoptera;Lasiommata megera;Lasiommata megera;1;Lasiommata megera;0.999928528239676;  
DMAZ108-09;Lepidoptera;Brenthis daphne;Brenthis daphne;0.001;Brenthis daphne;0.997781825264304;  
DMAZ109-09;Lepidoptera;Brenthis daphne;Brenthis daphne;0.001;Brenthis daphne;0.997781825264304;  
DMAZ110-09;Lepidoptera;Lasiommata maera;Lasiommata maera;1;Lasiommata maera;0.999997945450226;  
DMAZ111-09;Lepidoptera;Lasiommata maera;Lasiommata maera;1;Lasiommata maera;0.999997945450226;  
DMAZ112-09;Lepidoptera;Brenthis ino;NA;0.061;Brenthis ino;0.791997215074462;  
DMAZ114-09;Lepidoptera;Aphantopus hyperantus;Aphantopus hyperantus;0.003;Aphantopus hyperantus;0.999999455871523;  
DMAZ119-09;Lepidoptera;Erebia meolans;Erebia meolans;NA;Erebia meolans;0.999835953426128;  
DMAZ120-09;Lepidoptera;Erebia meolans;Erebia meolans;NA;Erebia meolans;0.999835953426128;  
DMAZ122-09;Lepidoptera;Lasiommata megera;Lasiommata megera;1;Lasiommata megera;0.99928528239676;  
DQ008096;Lepidoptera;Maniola nurag;Maniola nurag;0.991;Maniola nurag;0.983874803370865;  
DQ008097;Lepidoptera;Maniola nurag;Maniola nurag;0.991;Maniola nurag;0.983874803370865;  
DQ008098;Lepidoptera;Maniola nurag;NA;0.003;Maniola nurag;0.948160948668927;  
DQ008099;Lepidoptera;Maniola nurag;NA;0.003;Maniola nurag;0.948160948668927;  
DQ008100;Lepidoptera;Maniola nurag;NA;0.003;Maniola nurag;0.948160948668927;  
DQ008103;Lepidoptera;Maniola cecilia;Pyronia cecilia;NA;Pyronia cecilia;0.99999999995794;  
DQ205111;Lepidoptera;Limenitis camilla;Limenitis camilla;0.998;NA;0.999999999999951;  
DQ407763;Lepidoptera;Parnassius apollo;NA;0.001;NA;0.999999945436759;  
DQ407769;Lepidoptera;Parnassius mnemosyne;Parnassius mnemosyne;1;Parnassius mnemosyne;0.99992614958542;  
DQ463376;Lepidoptera;Aporia crataegi;NA;0.005;Aporia crataegi;0.999927154833558;  
EF514429;Lepidoptera;Parnassius apollo;Parnassius apollo;0.999;Parnassius apollo;0.986977990307296;  
EF514457;Lepidoptera;Parnassius apollo;Parnassius apollo;1;Parnassius apollo;0.99930702366574;  
EU597125;Lepidoptera;Polyommatus amandus;Polyommatus amandus;0.009;Polyommatus amandus;0.999899545629377;  
EU597126;Lepidoptera;Polyommatus amandus;Polyommatus amandus;0.009;Polyommatus amandus;0.999899545629377;  
EU597131;Lepidoptera;Polyommatus eros;NA;0.001;NA;0.999997124762555;  
EU597132;Lepidoptera;Polyommatus eros;NA;0.001;NA;0.999997124762555;  
EU597133;Lepidoptera;Polyommatus eros;NA;0.001;NA;0.999997548457523;  
EU597136;Lepidoptera;Polyommatus eros;NA;0.001;NA;0.99999798124352;  
EU597137;Lepidoptera;Polyommatus eros;NA;0.001;NA;0.99999798124352;  
EU597138;Lepidoptera;Polyommatus eros;NA;NA;NA;0.999997071831858;  
EU597139;Lepidoptera;Polyommatus icarus;NA;0.001;NA;0.99999868591263;  
EU597140;Lepidoptera;Polyommatus icarus;NA;0.002;NA;0.99999916681562;  
EU597141;Lepidoptera;Polyommatus icarus;NA;0.002;NA;0.99999916681562;

EU836659;Lepidoptera;Parnassius mnemosyne;Parnassius mnemosyne;NA;NA;0.993531071388157;  
 EU836660;Lepidoptera;Parnassius mnemosyne;Parnassius mnemosyne;1;NA;0.991699445878714;  
 EU836661;Lepidoptera;Parnassius mnemosyne;Parnassius mnemosyne;1;NA;0.990370981718783;  
 EU836662;Lepidoptera;Parnassius mnemosyne;Parnassius mnemosyne;NA;NA;0.993414156509127;  
 EU836663;Lepidoptera;Parnassius mnemosyne;Parnassius mnemosyne;NA;NA;0.994340756388564;  
 EU836664;Lepidoptera;Parnassius mnemosyne;Parnassius mnemosyne;1;NA;0.992199494304769;  
 EU836665;Lepidoptera;Parnassius mnemosyne;Parnassius mnemosyne;1;NA;0.987655159599278;  
 EU836666;Lepidoptera;Parnassius mnemosyne;Parnassius mnemosyne;1;NA;0.986942554821084;  
 EU836667;Lepidoptera;Parnassius mnemosyne;Parnassius mnemosyne;1;NA;0.990617919362508;  
 EU836668;Lepidoptera;Parnassius mnemosyne;Parnassius mnemosyne;1;NA;0.991111110687633;  
 EU836669;Lepidoptera;Parnassius mnemosyne;Parnassius mnemosyne;NA;NA;0.993240577424131;  
 EU836670;Lepidoptera;Parnassius mnemosyne;Parnassius mnemosyne;1;NA;0.982406714779643;  
 EU836671;Lepidoptera;Parnassius mnemosyne;Parnassius mnemosyne;1;NA;0.985834905775943;  
 EU836672;Lepidoptera;Parnassius mnemosyne;Parnassius mnemosyne;1;NA;0.98899361194782;  
 EU836673;Lepidoptera;Parnassius mnemosyne;Parnassius mnemosyne;0.999;NA;0.99332427093159;  
 EU836674;Lepidoptera;Parnassius mnemosyne;Parnassius mnemosyne;0.999;NA;0.992057296611131;  
 EU836675;Lepidoptera;Parnassius mnemosyne;Parnassius mnemosyne;1;NA;0.711473166529364;  
 EU836676;Lepidoptera;Parnassius mnemosyne;Parnassius mnemosyne;1;NA;0.988689274388334;  
 EU836677;Lepidoptera;Parnassius mnemosyne;Parnassius mnemosyne;1;NA;0.989758536204545;  
 EU836678;Lepidoptera;Parnassius mnemosyne;Parnassius mnemosyne;1;NA;0.988898603530705;  
 EU836679;Lepidoptera;Parnassius mnemosyne;Parnassius mnemosyne;1;NA;0.988920405611335;  
 EU836680;Lepidoptera;Parnassius mnemosyne;Parnassius mnemosyne;1;NA;0.988687360273623;  
 EU836681;Lepidoptera;Parnassius mnemosyne;Parnassius mnemosyne;1;NA;0.982182510600399;  
 EU836682;Lepidoptera;Parnassius mnemosyne;Parnassius mnemosyne;1;NA;0.987335499667498;  
 EU919281;Lepidoptera;Lampides boeticus;Lampides boeticus;1;NA;0.933856907629784;  
 EU919314;Lepidoptera;Lampides boeticus;Lampides boeticus;NA;NA;0.936571568153291;  
 EU919315;Lepidoptera;Lampides boeticus;Lampides boeticus;NA;NA;0.929041409027339;  
 EU919331;Lepidoptera;Lampides boeticus;Lampides boeticus;1;NA;0.92755033012778;  
 EU919338;Lepidoptera;Lampides boeticus;Lampides boeticus;1;NA;0.93145283590753;  
 EULEP1224-15;Lepidoptera;Lycaena thersamon;Thersamonia thersamon;NA;Thersamonia  
 thersamon;0.996061635185203;  
 EULEP1408-15;Lepidoptera;Hipparchia fagi;NA;NA;Hipparchia fagi;0.942857264035062;  
 EULEP1610-15;Lepidoptera;Hipparchia fagi;NA;NA;Hipparchia fagi;0.922352347358008;  
 EULEP1640-15;Lepidoptera;Limenitis populi;Limenitis populi;1;Limenitis populi;0.999999999913513;  
 EULEP1725-15;Lepidoptera;Cyraniris semiargus;NA;NA;Cyraniris semiargus;0.998830591470926;  
 EULEP2356-15;Lepidoptera;Hamearis lucina;Hamearis lucina;1;Hamearis lucina;0.999999998041574;  
 EULEP2588-15;Lepidoptera;Aglais ichnusa;Aglais ichnusa;0.001;NA;0.999999997028814;  
 EULEP2681-15;Lepidoptera;Boloria titania;NA;0.075;Boloria chariclea;0.875902760689287;  
 EULEP2806-15;Lepidoptera;Erebia neoridas;NA;NA;Erebia neoridas;0.990014687080988;  
 EULEP2818-15;Lepidoptera;Erebia manto;Erebia manto;0.014;Erebia manto;0.999902936830928;  
 EULEP2819-15;Lepidoptera;Erebia manto;Erebia manto;0.014;Erebia manto;0.999902936830928;  
 EULEP2821-15;Lepidoptera;Erebia manto;NA;0.176;Erebia manto;0.990266020044635;  
 EULEP2826-15;Lepidoptera;Erebia meolans;NA;0.03;Erebia meolans;0.989471197046052;  
 EULEP2827-15;Lepidoptera;Erebia meolans;NA;0.079;Erebia meolans;0.962039703443954;  
 EULEP2833-15;Lepidoptera;Erebia ottomana;Erebia ottomana;1;Erebia ottomana;0.999999997177142;  
 EULEP2858-15;Lepidoptera;Euphydryas intermedia;NA;0.001;Euphydryas intermedia;0.746327555155385;  
 EULEP3518-16;Lepidoptera;Boloria euphrosyne;Boloria euphrosyne;0.003;Boloria  
 euphrosyne;0.999972659970609;  
 EULEP3729-16;Lepidoptera;Cupido alcetas;NA;0.001;Cupido alcetas;0.966087411023027;  
 EULEP4127-16;Lepidoptera;Lasiommata maera;Lasiommata maera;1;Lasiommata maera;0.999769586492687;  
 EULEP4133-16;Lepidoptera;Limenitis camilla;Limenitis camilla;0.001;Limenitis  
 camilla;0.999843171870627;  
 EULEP4451-16;Lepidoptera;Pieris napi;NA;NA;Pieris napi;0.823232114003236;  
 EULEP4477-16;Lepidoptera;Plebejus idas;NA;0.007;NA;0.999546324331549;  
 EULEP4492-16;Lepidoptera;Plebejus idas;NA;0.001;NA;0.999033031509377;  
 EULEP4493-16;Lepidoptera;Plebejus idas;NA;0.001;NA;0.999430735322623;  
 EULEP4913-16;Lepidoptera;Brenthis ino;Brenthis ino;0.013;Brenthis ino;0.973702144793219;  
 EULEP5151-17;Lepidoptera;Parnassius apollo;Parnassius apollo;NA;Parnassius  
 apollo;0.986316317299342;  
 EULEP5158-17;Lepidoptera;Limenitis camilla;Limenitis camilla;0.001;Limenitis  
 camilla;0.999780663060643;  
 EULEP5159-17;Lepidoptera;Limenitis camilla;NA;0.001;Limenitis camilla;0.998716281294493;  
 EULEP576-15;Lepidoptera;Pyrgus carlinae;NA;0.001;NA;0.99999999640157;  
 EULEP5940-18;Lepidoptera;Erebia medusa;NA;0.04;Erebia medusa;0.984042649596477;  
 EULEP5941-18;Lepidoptera;Erebia medusa;NA;0.04;Erebia medusa;0.984042649596477;  
 EULEP5942-18;Lepidoptera;Erebia medusa;NA;0.04;Erebia medusa;0.984042649596477;  
 EULEP5943-18;Lepidoptera;Erebia medusa;NA;0.04;Erebia medusa;0.984042649596477;  
 EULEP5944-18;Lepidoptera;Erebia medusa;NA;0.04;Erebia medusa;0.984042649596477;  
 EULEP6004-20;Lepidoptera;Plebejus argus;NA;0.328;Plebejus argus;0.969789734199889;  
 EULEP6005-20;Lepidoptera;Hipparchia semele;NA;0.004;NA;0.999999999999872;  
 EULEP6006-20;Lepidoptera;Pyrgus malvae;Pyrgus malvae;NA;Pyrgus malvae;0.980121140374433;  
 EULEP6008-20;Lepidoptera;Favonius quercus;NA;NA;Favonius quercus;0.745528601618086;  
 EULEP6009-20;Lepidoptera;Aricia agestis;NA;0.073;Aricia agestis;0.999293749830595;  
 EULEP6010-20;Lepidoptera;Maniola jurtina;NA;0.001;Maniola jurtina;0.762537481133735;  
 EULEP6013-20;Lepidoptera;Lycaena phlaeas;Lycaena phlaeas;1;Lycaena phlaeas;0.999999996363186;  
 EULEP6014-20;Lepidoptera;Lycaena phlaeas;Lycaena phlaeas;1;Lycaena phlaeas;0.999999996363186;  
 EULEP6015-20;Lepidoptera;Araschnia levana;Araschnia levana;1;Araschnia levana;0.999999772187832;

EULEP6016-20;Lepidoptera;Polyommatus amandus;Polyommatus amandus;0.004;Polyommatus amandus;0.999986259154429;  
EULEP6017-20;Lepidoptera;Coenonympha arcania;NA;0.057;Coenonympha arcania;0.983992716466119;  
EULEP6019-20;Lepidoptera;Thymelicus lineola;Thymelicus lineola;1;Thymelicus lineola;0.999982844978955;  
EULEP6020-20;Lepidoptera;Coenonympha arcania;NA;0.057;Coenonympha arcania;0.983992716466119;  
EULEP6021-20;Lepidoptera;Argynnis aglaja;NA;NA;NA;0.99999999996955;  
EULEP6022-20;Lepidoptera;Polyommatus thersites;NA;NA;Polyommatus thersites;0.999999041958266;  
EULEP6024-20;Lepidoptera;Maniola jurtina;NA;NA;Maniola jurtina;0.746095236282775;  
EULEP6025-20;Lepidoptera;Lycaena dispar;Lycaena dispar;1;Lycaena dispar;0.999999990743959;  
EULEP6028-20;Lepidoptera;Polyommatus amandus;Polyommatus amandus;0.004;Polyommatus amandus;0.999986259154429;  
EULEP6029-20;Lepidoptera;Lasiommata maera;Lasiommata maera;1;Lasiommata maera;0.99999942908402;  
EULEP6030-20;Lepidoptera;Cyaniris semiargus;NA;NA;Cyaniris semiargus;0.998005169409319;  
EULEP6031-20;Lepidoptera;Ochlodes sylvanus;NA;0.316;Ochlodes sylvanus;0.996318754838625;  
EULEP6032-20;Lepidoptera;Cupido minimus;NA;0.009;Cupido minimus;0.999791453712643;  
EULEP6033-20;Lepidoptera;Lycaena phlaeas;Lycaena phlaeas;1;Lycaena phlaeas;0.99999996363186;  
EULEP6034-20;Lepidoptera;Coenonympha arcania;NA;0.057;Coenonympha arcania;0.983992716466119;  
EULEP6036-20;Lepidoptera;Glaucopsyche alexis;NA;NA;Glaucopsyche alexis;0.979381169624069;  
EULEP6037-20;Lepidoptera;Callophrys rubi;NA;0.01;Callophrys rubi;0.997394826446521;  
EULEP6038-20;Lepidoptera;Glaucopsyche alexis;NA;NA;Glaucopsyche alexis;0.979381169624069;  
EULEP6039-20;Lepidoptera;Aphantopus hyperantus;Aphantopus hyperantus;NA;Aphantopus hyperantus;0.997869678773523;  
EULEP6040-20;Lepidoptera;Aglaia urticae;Aglaia urticae;0.001;Aglaia urticae;0.994966452807995;  
EULEP6041-20;Lepidoptera;Pieris napi;NA;0.008;Pieris napi;0.840314219469586;  
EULEP6042-20;Lepidoptera;Melitaea diamina;NA;0.149;Melitaea diamina;0.99999996592464;  
EULEP6043-20;Lepidoptera;Pararge aegeria;Pararge aegeria;1;Pararge aegeria;0.99999999963165;  
EULEP6045-20;Lepidoptera;Gonepteryx rhamni;NA;0.474;Gonepteryx rhamni;0.982076396127858;  
EULEP6046-20;Lepidoptera;Polygonia c-album;NA;0.215;NA;0.999999192918557;  
EULEP6048-20;Lepidoptera;Erynnis tages;Erynnis tages;1;Erynnis tages;0.999999477791329;  
EULEP6049-20;Lepidoptera;Lasiommata maera;Lasiommata maera;0.998;Lasiommata maera;0.999999191101026;  
EULEP6050-20;Lepidoptera;Aricia artaxerxes;NA;0.383;Aricia artaxerxes;0.999814231048968;  
EULEP6051-20;Lepidoptera;Celastrina argiolus;Celastrina argiolus;1;Celastrina argiolus;0.999708846309046;  
EULEP6052-20;Lepidoptera;Boloria euphrosyne;Boloria euphrosyne;0.008;Boloria euphrosyne;0.999964281413411;  
EULEP6054-20;Lepidoptera;Callophrys rubi;NA;0.003;Callophrys rubi;0.997328639918919;  
EULEP6057-20;Lepidoptera;Erynnis tages;Erynnis tages;1;Erynnis tages;0.999995431835206;  
EULEP6058-20;Lepidoptera;Anthocharis cardamines;Anthocharis cardamines;1;Anthocharis cardamines;0.999999940675226;  
EULEP6059-20;Lepidoptera;Pieris napi;NA;0.066;Pieris napi;0.832895481558215;  
EULEP6060-20;Lepidoptera;Boloria euphrosyne;Boloria euphrosyne;0.008;Boloria euphrosyne;0.999964281413411;  
EULEP6062-20;Lepidoptera;Callophrys rubi;NA;0.003;Callophrys rubi;0.997328639918919;  
EULEP6066-20;Lepidoptera;Lycaena phlaeas;Lycaena phlaeas;1;Lycaena phlaeas;0.99999998167567;  
EULEP6067-20;Lepidoptera;Carterocephalus palaemon;Carterocephalus palaemon;0.016;Carterocephalus palaemon;0.930544560040029;  
EULEP6068-20;Lepidoptera;Lycaena hippothoe;NA;NA;Lycaena hippothoe;0.928973453460131;  
EULEP6070-20;Lepidoptera;Colias palaeno;NA;0.002;NA;0.99999999983681;  
EULEP6071-20;Lepidoptera;Boloria euphrosyne;Boloria euphrosyne;0.036;Boloria euphrosyne;0.999968054449582;  
EULEP6075-20;Lepidoptera;Colias palaeno;NA;0.002;NA;0.99999999983681;  
EULEP6076-20;Lepidoptera;Cyaniris semiargus;NA;NA;Cyaniris semiargus;0.999299367533383;  
EULEP6077-20;Lepidoptera;Aglaia urticae;Aglaia urticae;0.001;Aglaia urticae;0.994966452807995;  
EULEP6078-20;Lepidoptera;Ochlodes sylvanus;NA;0.315;Ochlodes sylvanus;0.99610625702004;  
EULEP6079-20;Lepidoptera;Lycaena virgaureae;NA;0.186;Lycaena virgaureae;0.999491227342155;  
EULEP6080-20;Lepidoptera;Coenonympha pamphilus;Coenonympha pamphilus;1;Coenonympha pamphilus;0.99999999999886;  
EULEP6081-20;Lepidoptera;Brenthis ino;Brenthis ino;0.997;Brenthis ino;0.996195711592226;  
EULEP6082-20;Lepidoptera;Argynnis aglaja;NA;0.005;NA;0.99999999994961;  
EULEP6084-20;Lepidoptera;Plebejus idas;NA;0.001;NA;0.999237786552083;  
EULEP6088-20;Lepidoptera;Aphantopus hyperantus;Aphantopus hyperantus;NA;Aphantopus hyperantus;0.998450183669756;  
EULEP6090-20;Lepidoptera;Lycaena virgaureae;NA;0.186;Lycaena virgaureae;0.999491227342155;  
EULEP6091-20;Lepidoptera;Apatura ilia;NA;0.165;Apatura ilia;0.956796812031481;  
EULEP6092-20;Lepidoptera;Araschnia levana;Araschnia levana;1;Araschnia levana;0.999999772187832;  
EULEP6094-20;Lepidoptera;Ochlodes sylvanus;NA;0.316;Ochlodes sylvanus;0.996318754838625;  
EULEP6096-20;Lepidoptera;Coenonympha arcania;NA;0.067;Coenonympha arcania;0.978811371852141;  
EULEP6097-20;Lepidoptera;Melanargia galathea;NA;NA;Melanargia galathea;0.943593560237409;  
EULEP6098-20;Lepidoptera;Lycaena virgaureae;NA;0.076;Lycaena virgaureae;0.999570679451439;  
EULEP6099-20;Lepidoptera;Issoria lathonia;Issoria lathonia;1;Issoria lathonia;0.99999999993747;  
EULEP6100-20;Lepidoptera;Pieris napi;NA;0.011;Pieris napi;0.801985394724814;  
EULEP6101-20;Lepidoptera;Maniola jurtina;NA;0.001;Maniola jurtina;0.762537481133735;  
EULEP6104-20;Lepidoptera;Melanargia galathea;Melanargia galathea;NA;Melanargia galathea;0.970417110336134;  
EULEP6105-20;Lepidoptera;Thymelicus lineola;Thymelicus lineola;1;Thymelicus lineola;0.999952080918693;

EULEP6106-20;Lepidoptera;Lycaena phlaeas;Lycaena phlaeas;1;Lycaena phlaeas;0.999999996363186;  
EULEP6107-20;Lepidoptera;Celastrina argiolus;Celastrina argiolus;1;Celastrina  
argiolus;0.999527385150531;  
EULEP6110-20;Lepidoptera;Pararge aegeria;Pararge aegeria;1;Pararge aegeria;0.999999999530445;  
EULEP6111-20;Lepidoptera;Cupido argiades;NA;NA;NA;0.999999999899952;  
EULEP6112-20;Lepidoptera;Lycaena tityrus;Lycaena tityrus;1;Lycaena tityrus;0.999998928238034;  
EULEP6114-20;Lepidoptera;Aricia agestis;NA;0.253;Aricia agestis;0.996350017387504;  
EULEP6115-20;Lepidoptera;Melanargia galathea;NA;NA;Melanargia galathea;0.943593560237409;  
EULEP6116-20;Lepidoptera;Thymelicus lineola;Thymelicus lineola;1;Thymelicus  
lineola;0.999887623258534;  
EULEP6118-20;Lepidoptera;Pararge aegeria;Pararge aegeria;1;Pararge aegeria;0.99999999963165;  
EULEP6119-20;Lepidoptera;Lycaena tityrus;Lycaena tityrus;1;Lycaena tityrus;0.999998928238034;  
EULEP6121-20;Lepidoptera;Thymelicus lineola;Thymelicus lineola;1;Thymelicus  
lineola;0.999951047783181;  
EULEP6122-20;Lepidoptera;Boloria dia;Boloria dia;1;Boloria dia;0.99999999980503;  
EULEP6123-20;Lepidoptera;Aglais urticae;NA;0.002;Aglais urticae;0.987497593219019;  
EULEP6124-20;Lepidoptera;Boloria selene;NA;0.098;Boloria selene;0.999999661291981;  
EULEP6128-20;Lepidoptera;Aphantopus hyperantus;Aphantopus hyperantus;0.996;Aphantopus  
hyperantus;0.999999185470491;  
EULEP6129-20;Lepidoptera;Pieris rapae;NA;NA;Pieris rapae;0.999980812404001;  
EULEP6130-20;Lepidoptera;Lasiommata megera;Lasiommata megera;1;Lasiommata  
megera;0.999928528239676;  
EULEP6131-20;Lepidoptera;Coenonympha pamphilus;Coenonympha pamphilus;1;Coenonympha  
pamphilus;0.99999999999744;  
EULEP6132-20;Lepidoptera;Gonepteryx rhamni;NA;0.474;Gonepteryx rhamni;0.982076396127858;  
EULEP6133-20;Lepidoptera;Cyaniris semiargus;NA;NA;Cyaniris semiargus;0.999299367533383;  
EULEP6134-20;Lepidoptera;Lycaena dispar;Lycaena dispar;1;Lycaena dispar;0.99999990743959;  
EULEP6135-20;Lepidoptera;Maniola jurtina;NA;0.001;Maniola jurtina;0.762537481133735;  
EULEP6136-20;Lepidoptera;Thymelicus lineola;Thymelicus lineola;1;Thymelicus  
lineola;0.999952080918693;  
EULEP6137-20;Lepidoptera;Boloria selene;NA;0.001;Boloria selene;0.999995370701811;  
EULEP6138-20;Lepidoptera;Lasiommata megera;Lasiommata megera;1;Lasiommata  
megera;0.999928528239676;  
EULEP6139-20;Lepidoptera;Vanessa atalanta;Vanessa atalanta;1;Vanessa atalanta;0.99999999757762;  
EULEP6140-20;Lepidoptera;Pararge aegeria;Pararge aegeria;1;Pararge aegeria;0.99999999963165;  
EULEP6142-20;Lepidoptera;Colias hyale;Colias hyale;0.015;Colias hyale;0.999997884296128;  
EULEP6143-20;Lepidoptera;Coenonympha pamphilus;Coenonympha pamphilus;1;Coenonympha  
pamphilus;0.99999999999744;  
EULEP6144-20;Lepidoptera;Melanargia galathea;Melanargia galathea;NA;Melanargia  
galathea;0.981855578470499;  
EULEP6146-20;Lepidoptera;Lycaena phlaeas;Lycaena phlaeas;1;Lycaena phlaeas;0.999999996363186;  
EULEP6148-20;Lepidoptera;Brenthis ino;Brenthis ino;0.006;Brenthis ino;0.977279137111276;  
EULEP6149-20;Lepidoptera;Pyronia tithonus;Pyronia tithonus;1;Pyronia tithonus;1;  
EULEP6150-20;Lepidoptera;Lycaena phlaeas;Lycaena phlaeas;1;Lycaena phlaeas;0.999999996363186;  
EULEP6155-20;Lepidoptera;Anthocharis cardamines;Anthocharis cardamines;1;Anthocharis  
cardamines;0.999999940675226;  
EULEP6156-20;Lepidoptera;Cupido minimus;NA;0.001;Cupido minimus;0.999803920701362;  
EULEP6157-20;Lepidoptera;Glaucopsyche alexis;NA;NA;Glaucopsyche alexis;0.976271367951777;  
EULEP6158-20;Lepidoptera;Gonepteryx rhamni;NA;0.192;Gonepteryx rhamni;0.991002175992451;  
EULEP6159-20;Lepidoptera;Melitaea cinxia;Melitaea cinxia;1;Melitaea cinxia;0.99999999999829;  
EULEP6161-20;Lepidoptera;Euphydryas aurinia;NA;0.31;Euphydryas aurinia;0.993387708761386;  
EULEP6162-20;Lepidoptera;Pyrgus armoricanus;Pyrgus armoricanus;1;Pyrgus  
armoricanus;0.997478680096412;  
EULEP6163-20;Lepidoptera;Lycaena phlaeas;Lycaena phlaeas;1;Lycaena phlaeas;0.999999986385689;  
EULEP6164-20;Lepidoptera;Pyrgus armoricanus;Pyrgus armoricanus;1;Pyrgus  
armoricanus;0.997478680096412;  
EULEP6165-20;Lepidoptera;Pararge aegeria;Pararge aegeria;1;Pararge aegeria;0.99999999836319;  
EULEP6166-20;Lepidoptera;Parnassius mnemosyne;Parnassius mnemosyne;1;Parnassius  
mnemosyne;0.99999987497234;  
EULEP6167-20;Lepidoptera;Scolitantides orion;Scolitantides orion;1;Scolitantides  
orion;0.99999991449329;  
EULEP6168-20;Lepidoptera;Callophrys rubi;NA;0.003;Callophrys rubi;0.997328639918919;  
EULEP6169-20;Lepidoptera;Anthocharis cardamines;Anthocharis cardamines;1;Anthocharis  
cardamines;0.999999940675226;  
EULEP6170-20;Lepidoptera;Carcharodus alceae;Carcharodus alceae;0.998;Carcharodus  
alceae;0.999999996978374;  
EULEP6171-20;Lepidoptera;Gonepteryx rhamni;NA;0.474;Gonepteryx rhamni;0.982076396127858;  
EULEP6172-20;Lepidoptera;Brenthis daphne;Brenthis daphne;0.001;Brenthis  
daphne;0.997781825264304;  
EULEP6173-20;Lepidoptera;Coenonympha arcania;NA;0.001;Coenonympha arcania;0.956328802179621;  
EULEP6174-20;Lepidoptera;Aporia crataegi;NA;NA;Aporia crataegi;0.999997351946131;  
EULEP6175-20;Lepidoptera;Thymelicus sylvestris;Thymelicus sylvestris;1;Thymelicus  
sylvestris;0.99999985935205;  
EULEP6177-20;Lepidoptera;Coenonympha glycerion;NA;0.389;Coenonympha glycerion;0.999998566525765;  
EULEP6180-20;Lepidoptera;Coenonympha glycerion;NA;0.264;Coenonympha glycerion;0.999998370144304;  
EULEP6181-20;Lepidoptera;Brenthis daphne;NA;0.102;Brenthis daphne;0.717134521611551;  
EULEP6182-20;Lepidoptera;Satyrium ilicis;Satyrium ilicis;1;Satyrium ilicis;0.99999974300067;  
EULEP6183-20;Lepidoptera;Satyrium acaciae;Satyrium acaciae;1;Satyrium acaciae;0.999999951077798;

EULEP6184-20;Lepidoptera;Melitaea diamina;NA;0.315;Melitaea diamina;0.999999923615721;  
EULEP6185-20;Lepidoptera;Apatura ilia;NA;0.165;Apatura ilia;0.956796812031481;  
EULEP6186-20;Lepidoptera;Melitaea cinxia;Melitaea cinxia;1;Melitaea cinxia;0.999999999999801;  
EULEP6187-20;Lepidoptera;Melanargia galathea;Melanargia galathea;NA;Melanargia  
galathea;0.981855578470499;  
EULEP6188-20;Lepidoptera;Argynnis aglaja;NA;NA;Speyeria aglaja;0.872991147917853;  
EULEP6189-20;Lepidoptera;Thymelicus lineola;Thymelicus lineola;1;Thymelicus  
lineola;0.999993723282816;  
EULEP6190-20;Lepidoptera;Coenonympha arcania;NA;0.096;Coenonympha arcania;0.962481905162994;  
EULEP6191-20;Lepidoptera;Aphantopus hyperantus;Aphantopus hyperantus;0.003;Aphantopus  
hyperantus;0.999999455871523;  
EULEP6193-20;Lepidoptera;Brenthis daphne;Brenthis daphne;0.001;Brenthis  
daphne;0.998611735797805;  
EULEP6195-20;Lepidoptera;Apatura iris;Apatura iris;1;Apatura iris;0.999999999999972;  
EULEP6196-20;Lepidoptera;Melitaea didyma;Melitaea didyma;NA;Melitaea didyma;0.987668646124956;  
EULEP6198-20;Lepidoptera;Satyrium spini;Satyrium spini;1;Satyrium spini;0.999999835426407;  
EULEP6200-20;Lepidoptera;Coenonympha glycerion;NA;0.264;Coenonympha glycerion;0.999998370144304;  
EULEP6201-20;Lepidoptera;Thymelicus lineola;Thymelicus lineola;1;Thymelicus  
lineola;0.999995927238524;  
EULEP6202-20;Lepidoptera;Coenonympha arcania;NA;0.022;Coenonympha arcania;0.987735012529952;  
EULEP6204-20;Lepidoptera;Lasiommata maera;Lasiommata maera;1;Lasiommata maera;0.999999140721485;  
EULEP6206-20;Lepidoptera;Pararge aegeria;Pararge aegeria;1;Pararge aegeria;0.99999999836319;  
EULEP6207-20;Lepidoptera;Boloria euphrosyne;Boloria euphrosyne;1;Boloria  
euphrosyne;0.999998514406196;  
EULEP6208-20;Lepidoptera;Lasiommata maera;Lasiommata maera;1;Lasiommata maera;0.999999181072746;  
EULEP6209-20;Lepidoptera;Euphydryas aurinia;NA;0.31;Euphydryas aurinia;0.993387708761386;  
EULEP6210-20;Lepidoptera;Cupido minimus;NA;0.002;Cupido minimus;0.999532194246603;  
EULEP6211-20;Lepidoptera;Erebia epiphron;NA;NA;Erebia epiphron;0.994401488812176;  
EULEP6214-20;Lepidoptera;Satyrus ferula;NA;0.001;Satyrus ferula;0.971317945932266;  
EULEP6215-20;Lepidoptera;Boloria graeca;Boloria graeca;1;Boloria graeca;0.99999974197039;  
EULEP6217-20;Lepidoptera;Brenthis ino;Brenthis ino;0.007;Brenthis ino;0.977157381961834;  
EULEP6218-20;Lepidoptera;Lycaena tityrus;Lycaena tityrus;1;Lycaena tityrus;0.999998928238034;  
EULEP6220-20;Lepidoptera;Polyommatus amandus;Polyommatus amandus;0.002;Polyommatus  
amandus;0.999976189132416;  
EULEP6221-20;Lepidoptera;Lasiommata megera;Lasiommata megera;0.006;Lasiommata  
megera;0.992588117195958;  
EULEP6222-20;Lepidoptera;Melanargia galathea;Melanargia galathea;NA;Melanargia  
galathea;0.981855578470499;  
EULEP6223-20;Lepidoptera;Gonepteryx rhamni;NA;0.39;Gonepteryx rhamni;0.997611156919627;  
EULEP6224-20;Lepidoptera;Coenonympha arcania;NA;0.001;NA;0.999999999999975;  
EULEP6225-20;Lepidoptera;Favonius quercus;NA;NA;NA;0.999999999999574;  
EULEP6226-20;Lepidoptera;Thymelicus sylvestris;NA;0.131;Thymelicus sylvestris;0.999961574491035;  
EULEP6227-20;Lepidoptera;Lycaena phlaeas;Lycaena phlaeas;1;Lycaena phlaeas;0.99999994740023;  
EULEP6228-20;Lepidoptera;Carterocephalus palaemon;NA;0.052;Carterocephalus  
palaemon;0.728445051795325;  
EULEP6229-20;Lepidoptera;Cupido osiris;Cupido osiris;0.002;Cupido osiris;0.999919806355472;  
EULEP6230-20;Lepidoptera;Hamearis lucina;NA;NA;Hamearis lucina;0.99999999972005;  
EULEP6231-20;Lepidoptera;Melitaea diamina;NA;0.13;Melitaea diamina;0.999999982010166;  
EULEP6232-20;Lepidoptera;Boloria titania;Boloria titania;0.97;Boloria titania;0.999611961598441;  
EULEP6233-20;Lepidoptera;Lycaena thersamon;NA;NA;Lycaena thersamon;0.9170475904551;  
EULEP6237-20;Lepidoptera;Vanessa cardui;Vanessa cardui;1;Vanessa cardui;0.999999803450484;  
EULEP6239-20;Lepidoptera;Parnassius mnemosyne;Parnassius mnemosyne;1;Parnassius  
mnemosyne;0.999999416965636;  
EULEP6242-20;Lepidoptera;Callophrys rubi;NA;0.002;Callophrys rubi;0.995660099455287;  
EULEP6243-20;Lepidoptera;Polyommatus amandus;Polyommatus amandus;0.004;Polyommatus  
amandus;0.999986259154429;  
EULEP6244-20;Lepidoptera;Aphantopus hyperantus;Aphantopus hyperantus;0.004;Aphantopus  
hyperantus;0.999598909345147;  
EULEP6245-20;Lepidoptera;Pyrgus malvae;Pyrgus malvae;NA;Pyrgus malvae;0.980121140374433;  
EULEP6247-20;Lepidoptera;Carterocephalus palaemon;NA;0.052;Carterocephalus  
palaemon;0.728445051795325;  
EULEP6248-20;Lepidoptera;Lycaena phlaeas;Lycaena phlaeas;1;Lycaena phlaeas;0.99999996363186;  
EULEP6249-20;Lepidoptera;Thecla betulae;Thecla betulae;1;Thecla betulae;0.99999999972886;  
EULEP6250-20;Lepidoptera;Colias palaeno;NA;0.002;NA;0.999999999983681;  
EULEP6253-20;Lepidoptera;Celastrina argiolus;Celastrina argiolus;1;Celastrina  
argiolus;0.999708846309046;  
EULEP6254-20;Lepidoptera;Callophrys rubi;NA;0.003;Callophrys rubi;0.997328639918919;  
EULEP6256-20;Lepidoptera;Boloria euphrosyne;Boloria euphrosyne;0.991;Boloria  
euphrosyne;0.999987993057807;  
EULEP6259-20;Lepidoptera;Pararge aegeria;Pararge aegeria;1;Pararge aegeria;0.99999999846608;  
EULEP6261-20;Lepidoptera;Polygonia c-album;NA;0.215;NA;0.999999192918557;  
EULEP6262-20;Lepidoptera;Callophrys rubi;NA;0.003;Callophrys rubi;0.997328639918919;  
EULEP6263-20;Lepidoptera;Polyommatus amandus;Polyommatus amandus;0.003;Polyommatus  
amandus;0.999980071833264;  
EULEP6264-20;Lepidoptera;Callophrys rubi;NA;0.003;Callophrys rubi;0.997328639918919;  
EULEP6265-20;Lepidoptera;Lycaena tityrus;Lycaena tityrus;1;Lycaena tityrus;0.999999137688152;  
EULEP6268-20;Lepidoptera;Pyrgus armoricanus;Pyrgus armoricanus;1;Pyrgus  
armoricanus;0.997478680096412;

EULEP6270-20;Lepidoptera;Glaucopsyche alexis;NA;NA;Glaucopsyche alexis;0.969998277832517;  
 EULEP6271-20;Lepidoptera;Anthocharis cardamines;Anthocharis cardamines;0.001;Anthocharis  
 cardamines;0.99999896812517;  
 EULEP6272-20;Lepidoptera;Glaucopsyche alexis;NA;NA;Glaucopsyche alexis;0.970914290380378;  
 EULEP6273-20;Lepidoptera;Polyommatus thersites;NA;NA;Polyommatus thersites;0.999999041958266;  
 EULEP6274-20;Lepidoptera;Cupido osiris;Cupido osiris;0.001;Cupido osiris;0.99999920729954;  
 EULEP6277-20;Lepidoptera;Coenonympha arcania;NA;0.001;NA;0.999999999999975;  
 EULEP6278-20;Lepidoptera;Glaucopsyche alexis;NA;NA;Glaucopsyche alexis;0.979381169624069;  
 EULEP6279-20;Lepidoptera;Polyommatus amandus;Polyommatus amandus;0.006;Polyommatus  
 amandus;0.999984603640236;  
 EULEP6280-20;Lepidoptera;Euphydryas aurinia;NA;0.31;Euphydryas aurinia;0.993387708761386;  
 EULEP6281-20;Lepidoptera;Aporia crataegi;NA;NA;Aporia crataegi;0.999997266436607;  
 EULEP6283-20;Lepidoptera;Polyommatus thersites;NA;0.019;Polyommatus thersites;0.999997614558399;  
 EULEP6286-20;Lepidoptera;Hamearis lucina;NA;NA;Hamearis lucina;0.99999999984141;  
 EULEP6287-20;Lepidoptera;Gonepteryx rhamni;NA;0.474;Gonepteryx rhamni;0.982076396127858;  
 EULEP6288-20;Lepidoptera;Coenonympha pamphilus;Coenonympha pamphilus;1;Coenonympha  
 pamphilus;0.99999999999744;  
 EULEP6289-20;Lepidoptera;Pyrgus armoricanus;Pyrgus armoricanus;1;Pyrgus  
 armoricanus;0.99700549775422;  
 EULEP6290-20;Lepidoptera;Thymelicus lineola;Thymelicus lineola;1;Thymelicus  
 lineola;0.999920011109672;  
 EULEP6291-20;Lepidoptera;Aricia artaxerxes;Plebejus argus;1;Aricia artaxerxes;0.999743187199922;  
 EULEP6292-20;Lepidoptera;Vanessa atalanta;Vanessa atalanta;1;Vanessa atalanta;0.99999998808789;  
 EULEP6293-20;Lepidoptera;Arethusana arethusa;NA;0.062;Arethusana arethusa;0.999962489703143;  
 EULEP6296-20;Lepidoptera;Satyrium ilicis;Satyrium ilicis;1;Satyrium ilicis;0.99999963901758;  
 EULEP6297-20;Lepidoptera;Cyaniris semiargus;NA;NA;Cyaniris semiargus;0.999051841766953;  
 EULEP6298-20;Lepidoptera;Cupido osiris;Cupido osiris;1;Cupido osiris;0.99998710927265;  
 EULEP6299-20;Lepidoptera;Polyommatus daphnis;NA;0.014;Polyommatus daphnis;0.986744184248688;  
 EULEP6300-20;Lepidoptera;Issoria lathonia;Issoria lathonia;1;Issoria lathonia;0.99999999989257;  
 EULEP6302-20;Lepidoptera;Colias hyale;NA;0.488;Colias hyale;0.999915488936852;  
 EULEP6303-20;Lepidoptera;Gonepteryx rhamni;NA;0.474;Gonepteryx rhamni;0.982076396127858;  
 EULEP6304-20;Lepidoptera;Aglaia urticae;Aglaia urticae;0.001;Aglaia urticae;0.990690600684087;  
 EULEP6306-20;Lepidoptera;Anthocharis euphenoides;NA;0.007;Anthocharis  
 euphenoides;0.97843137547761;  
 EULEP6309-20;Lepidoptera;Cyaniris semiargus;NA;NA;Cyaniris semiargus;0.998898909490417;  
 EULEP6311-20;Lepidoptera;Boloria euphrosyne;Boloria euphrosyne;0.018;Boloria  
 euphrosyne;0.999995315694861;  
 EULEP6312-20;Lepidoptera;Argynnis aglaja;NA;NA;NA;0.999999999997818;  
 EULEP6313-20;Lepidoptera;Boloria titania;Boloria titania;0.001;Boloria titania;0.99983358374111;  
 EULEP6314-20;Lepidoptera;Coenonympha arcania;NA;0.076;Coenonympha arcania;0.970852850065578;  
 EULEP6315-20;Lepidoptera;Erebia meolans;NA;NA;Erebia meolans;0.999558897580846;  
 EULEP6316-20;Lepidoptera;Melanargia galathea;Melanargia galathea;NA;Melanargia  
 galathea;0.981855578470499;  
 EULEP6317-20;Lepidoptera;Pyrgus serratulae;Pyrgus serratulae;1;Pyrgus  
 serratulae;0.99999694697398;  
 EULEP6318-20;Lepidoptera;Carcharodus alceae;Carcharodus alceae;1;Carcharodus  
 alceae;0.9999999711855;  
 EULEP6319-20;Lepidoptera;Erebia ottomana;Erebia ottomana;1;Erebia ottomana;0.999999994283371;  
 EULEP6320-20;Lepidoptera;Thecla betulae;Thecla betulae;1;Thecla betulae;0.99999999931561;  
 EULEP6322-20;Lepidoptera;Favonius quercus;NA;NA;Favonius quercus;0.73046069582187;  
 EULEP6324-20;Lepidoptera;Aphantopus hyperantus;Aphantopus hyperantus;0.007;Aphantopus  
 hyperantus;0.999716519423631;  
 EULEP6326-20;Lepidoptera;Melitaea didyma;Melitaea didyma;1;Melitaea didyma;0.98897548959593;  
 EULEP6327-20;Lepidoptera;Thecla betulae;Thecla betulae;1;Thecla betulae;0.99999999965127;  
 EULEP6331-20;Lepidoptera;Lycaena virgaureae;NA;0.095;Lycaena virgaureae;0.99947625902545;  
 EULEP6332-20;Lepidoptera;Thymelicus lineola;Thymelicus lineola;1;Thymelicus  
 lineola;0.999971535093703;  
 EULEP6333-20;Lepidoptera;Brenthis ino;Brenthis ino;0.001;Brenthis ino;0.994711912827522;  
 EULEP6334-20;Lepidoptera;Argynnis aglaja;NA;NA;NA;0.99999999998051;  
 EULEP6335-20;Lepidoptera;Erynnis tages;Erynnis tages;1;Erynnis tages;0.999999281987018;  
 EULEP6338-20;Lepidoptera;Lasiommata maera;Lasiommata maera;0.999;Lasiommata  
 maera;0.999996386594878;  
 EULEP6339-20;Lepidoptera;Pieris rapae;NA;0.038;Pieris rapae;0.999969767806059;  
 EULEP6340-20;Lepidoptera;Erebia pandrose;Erebia pandrose;0.998;Erebia  
 pandrose;0.997117103851311;  
 EULEP6341-20;Lepidoptera;Aglaia urticae;Aglaia urticae;0.003;Aglaia urticae;0.991278660373755;  
 EULEP6342-20;Lepidoptera;Coenonympha pamphilus;Coenonympha pamphilus;1;Coenonympha  
 pamphilus;0.99999999999886;  
 EULEP6344-20;Lepidoptera;Pieris napi;NA;0.013;Pieris napi;0.798118615202961;  
 EULEP6345-20;Lepidoptera;Boloria euphrosyne;Boloria euphrosyne;0.999;Boloria  
 euphrosyne;0.999990576157994;  
 EULEP6346-20;Lepidoptera;Callophrys rubi;NA;0.003;Callophrys rubi;0.997328639918919;  
 EULEP6349-20;Lepidoptera;Colias palaeno;NA;0.002;NA;0.99999999983681;  
 EULEP6351-20;Lepidoptera;Boloria selene;NA;0.019;Boloria selene;0.999998063439647;  
 EULEP6352-20;Lepidoptera;Pieris napi;NA;0.011;Pieris napi;0.801985394724814;  
 EULEP6354-20;Lepidoptera;Ochlodes sylvanus;NA;0.316;Ochlodes sylvanus;0.996318754838625;  
 EULEP6355-20;Lepidoptera;Pararge aegeria;Pararge aegeria;1;Pararge aegeria;0.99999999963165;  
 EULEP6357-20;Lepidoptera;Aglaia urticae;NA;0.002;Aglaia urticae;0.987497593219019;

EULEP6361-20;Lepidoptera;Lycaena virgaureae;Lycaena virgaureae;0.027;Lycaena virgaureae;0.999582921361102;  
EULEP6363-20;Lepidoptera;Thecla betulae;Thecla betulae;1;Thecla betulae;0.99999999955577;  
EULEP6364-20;Lepidoptera;Pieris napi;NA;0.011;Pieris napi;0.801985394724814;  
EULEP6365-20;Lepidoptera;Anthocharis cardamines;Anthocharis cardamines;1;Anthocharis cardamines;0.999999843941806;  
EULEP6366-20;Lepidoptera;Boloria euphrosyne;Boloria euphrosyne;0.001;Boloria euphrosyne;0.999985640170951;  
EULEP6367-20;Lepidoptera;Pieris napi;NA;0.028;Pieris napi;0.888205720664699;  
EULEP6369-20;Lepidoptera;Boloria euphrosyne;Boloria euphrosyne;1;Boloria euphrosyne;0.999989902710144;  
EULEP6370-20;Lepidoptera;Aporia crataegi;NA;NA;Aporia crataegi;0.999996781126733;  
EULEP6372-20;Lepidoptera;Vanessa atalanta;Vanessa atalanta;1;Vanessa atalanta;0.99999999805453;  
EULEP6375-20;Lepidoptera;Cyaniris semiargus;NA;NA;Cyaniris semiargus;0.999299367533383;  
EULEP6378-20;Lepidoptera;Ochlodes sylvanus;NA;0.316;Ochlodes sylvanus;0.996318754838625;  
EULEP6379-20;Lepidoptera;Aphantopus hyperantus;Aphantopus hyperantus;0.003;Aphantopus hyperantus;0.999999455871523;  
EULEP6381-20;Lepidoptera;Boloria thore;Boloria thore;1;Boloria thore;0.999999996930853;  
EULEP955-15;Lepidoptera;Limenitis camilla;Limenitis camilla;0.999;Limenitis camilla;0.999930476876987;  
EZCHB293-09;Lepidoptera;Charaxes jasius;Charaxes jasius;NA;Charaxes jasius;0.949854280059292;  
EZHBA001-07;Lepidoptera;Arethusana arethusana;Arethusana arethusana;0.025;Arethusana arethusana;0.999964979600124;  
EZHBA068-07;Lepidoptera;Brenthis ino;Brenthis ino;0.005;Brenthis ino;0.960910255966063;  
EZHBA070-07;Lepidoptera;Brenthis ino;Brenthis ino;0.003;Brenthis ino;0.99471031617257;  
EZHBA079-07;Lepidoptera;Melitaea cinxia;Melitaea cinxia;0.044;Melitaea cinxia;0.99999999992383;  
EZHBA080-07;Lepidoptera;Melitaea cinxia;NA;0.16;Melitaea cinxia;0.99999999999176;  
EZHBA081-07;Lepidoptera;Melitaea cinxia;NA;0.057;Melitaea cinxia;0.99999999999545;  
EZHBA206-07;Lepidoptera;Pieris napi;NA;0.011;Pieris napi;0.801985394724814;  
EZHBA208-07;Lepidoptera;Pieris napi;NA;NA;NA;0.99999999999991;  
EZHBA210-07;Lepidoptera;Pieris napi;NA;0.008;Pieris napi;0.840314219469586;  
EZHBA211-07;Lepidoptera;Pieris napi;NA;0.084;Pieris napi;0.885343420349066;  
EZHBA215-07;Lepidoptera;Pararge aegeria;Pararge aegeria;1;Pararge aegeria;0.99999999809319;  
EZHBA216-07;Lepidoptera;Pieris napi;NA;0.011;Pieris napi;0.801985394724814;  
EZHBA229-07;Lepidoptera;Erebia medusa;NA;0.009;Erebia medusa;0.986275612856827;  
EZHBA230-07;Lepidoptera;Erebia medusa;NA;0.009;Erebia medusa;0.986275612856827;  
EZHBA236-07;Lepidoptera;Aphantopus hyperantus;Aphantopus hyperantus;1;Aphantopus hyperantus;0.999999429853367;  
EZHBA238-07;Lepidoptera;Boloria titania;Boloria titania;0.001;Boloria titania;0.99983358374111;  
EZHBA240-07;Lepidoptera;Boloria titania;Boloria titania;0.001;Boloria titania;0.99983358374111;  
EZHBA242-07;Lepidoptera;Erebia medusa;NA;0.092;Erebia oeme;0.999999999421647;  
EZHBA243-07;Lepidoptera;Erebia medusa;NA;0.092;Erebia oeme;0.999999999421647;  
EZHBA244-07;Lepidoptera;Erebia pandrose;Erebia pandrose;0.005;Erebia pandrose;0.994914940562747;  
EZHBA245-07;Lepidoptera;Euphydryas aurinia;NA;0.31;Euphydryas aurinia;0.993387708761386;  
EZHBA261-07;Lepidoptera;Thecla betulae;Thecla betulae;1;Thecla betulae;0.9999999996885;  
EZHBA279-07;Lepidoptera;Erebia pandrose;Erebia pandrose;0.008;Erebia pandrose;0.992131426961598;  
EZHBA291-07;Lepidoptera;Plebejus idas;NA;0.001;NA;0.998019917903297;  
EZHBA292-07;Lepidoptera;Plebejus idas;NA;0.004;NA;0.999073942160048;  
EZHBA308-07;Lepidoptera;Melitaea didyma;NA;0.165;Melitaea latonigena;0.997364814828811;  
EZHBA329-07;Lepidoptera;Pieris napi;NA;0.001;Pieris virginicensis;0.797762237336339;  
EZHBA331-07;Lepidoptera;Maculinea teleius;NA;0.498;Phengaris teleius;0.707377020793528;  
EZHBA336-07;Lepidoptera;Coenonympha glycerion;Coenonympha hero;0.007;Coenonympha glycerion;0.952889470375269;  
EZHBA337-07;Lepidoptera;Chazara briseis;Chazara briseis;0.001;Chazara briseis;0.999984130678865;  
EZHBA338-07;Lepidoptera;Vanessa cardui;Vanessa cardui;1;Vanessa cardui;0.999999803450484;  
EZHBA347-07;Lepidoptera;Plebejus argus;Plebejus argus;1;Aricia artaxerxes;0.999744916772824;  
EZHBA352-07;Lepidoptera;Lampides boeticus;Lampides boeticus;1;Lampides boeticus;0.999999999304265;  
EZHBA361-07;Lepidoptera;Callophrys rubi;NA;0.002;Callophrys rubi;0.996854375168945;  
EZHBA362-07;Lepidoptera;Callophrys rubi;NA;0.002;Callophrys rubi;0.996854375168945;  
EZHBA363-07;Lepidoptera;Araschnia levana;Araschnia levana;1;Araschnia levana;0.999999757979766;  
EZHBA370-07;Lepidoptera;Aporia crataegi;NA;0.002;Aporia crataegi;0.999998160741186;  
EZHBA371-07;Lepidoptera;Aporia crataegi;NA;NA;Aporia crataegi;0.999995760621692;  
EZHBA372-07;Lepidoptera;Aporia crataegi;NA;NA;Aporia crataegi;0.999995760621692;  
EZHBA375-07;Lepidoptera;Celastrina argiolus;Celastrina argiolus;1;Celastrina argiolus;0.999659368369645;  
EZHBA376-07;Lepidoptera;Celastrina argiolus;Celastrina argiolus;1;Celastrina argiolus;0.999659368369645;  
EZHBA385-07;Lepidoptera;Thymelicus lineola;Thymelicus lineola;1;Thymelicus lineola;0.999972112780985;  
EZHBA387-07;Lepidoptera;Plebejus idas;NA;0.001;NA;0.9992305574893;  
EZHBA393-07;Lepidoptera;Scolitantides orion;Scolitantides orion;NA;Scolitantides orion;0.99999987418505;  
EZHBA394-07;Lepidoptera;Scolitantides orion;Scolitantides orion;1;Scolitantides orion;0.99999985205363;  
EZHBA410-07;Lepidoptera;Boloria thore;Boloria thore;1;Boloria thore;0.999999683688479;  
EZHBA416-07;Lepidoptera;Euphydryas intermedia;NA;0.001;Euphydryas aurinia;0.829740071784734;  
EZHBA417-07;Lepidoptera;Euphydryas intermedia;NA;0.324;Euphydryas intermedia;0.954108568236655;

EZHBA419-07;Lepidoptera;Thecla betulae;Thecla betulae;1;Thecla betulae;0.99999999996885;  
EZHBA462-07;Lepidoptera;Lycaena phlaeas;Lycaena phlaeas;0.012;NA;0.772489731589761;  
EZHBA466-07;Lepidoptera;Carterocephalus palaemon;NA;0.036;Carterocephalus  
palaemon;0.875682325584506;  
EZHBA467-07;Lepidoptera;Carterocephalus palaemon;NA;0.034;Carterocephalus  
palaemon;0.841107463891872;  
EZHBA473-07;Lepidoptera;Erynnis tages;Erynnis tages;1;Erynnis tages;0.999998746428095;  
EZHBA474-07;Lepidoptera;Erynnis tages;Erynnis tages;1;Erynnis tages;0.999997668555569;  
EZHBA475-07;Lepidoptera;Araschnia levana;NA;0.186;Neptis sappho;0.999987268767013;  
EZHBA479-07;Lepidoptera;Glaucopsyche alexis;Glaucopsyche alexis;0.001;Glaucopsyche  
alexis;0.996228899058554;  
EZHBA480-07;Lepidoptera;Carterocephalus palaemon;Carterocephalus palaemon;0.011;Carterocephalus  
palaemon;0.924877521328362;  
EZHBA484-07;Lepidoptera;Pyrgus malvae;Pyrgus malvae;NA;Pyrgus malvae;0.981848255193114;  
EZHBA487-07;Lepidoptera;Lasiommata maera;Lasiommata maera;0.999;Lasiommata  
maera;0.999991974294436;  
EZHBA517-07;Lepidoptera;Boloria napaea;NA;0.004;Boloria napaea;0.863893254514718;  
EZHBA533-07;Lepidoptera;Argynnis paphia;Argynnis paphia;1;Argynnis paphia;0.999999990374505;  
EZHBA534-07;Lepidoptera;Argynnis paphia;Argynnis paphia;1;Argynnis paphia;0.999999990374505;  
EZHBA536-07;Lepidoptera;Aglais urticae;Aglais urticae;1;Aglais urticae;0.789513097787554;  
EZHBA538-07;Lepidoptera;Issoria lathonia;Issoria lathonia;1;Issoria lathonia;0.99999999987949;  
EZHBA539-07;Lepidoptera;Polyommatus icarus;NA;0.02;Polyommatus icarus;0.995583946382704;  
EZHBA540-07;Lepidoptera;Polyommatus icarus;NA;0.02;Polyommatus icarus;0.995583946382704;  
EZHBA541-07;Lepidoptera;Polyommatus icarus;NA;0.006;Polyommatus icarus;0.987670691800453;  
EZHBA545-07;Lepidoptera;Satyrus ferula;Satyrus ferula;0.001;Satyrus ferula;0.969457022045489;  
EZHBA546-07;Lepidoptera;Satyrus ferula;Satyrus ferula;0.006;Satyrus ferula;0.982914749148686;  
EZHBA547-07;Lepidoptera;Satyrus ferula;NA;0.001;Satyrus ferula;0.96895623361784;  
EZHBA550-07;Lepidoptera;Chazara briseis;Chazara briseis;0.001;Chazara briseis;0.999949744657138;  
EZHBA551-07;Lepidoptera;Chazara briseis;Chazara briseis;0.993;Chazara briseis;0.999983113709829;  
EZHBA555-07;Lepidoptera;Satyrus ferula;Satyrus ferula;0.998;Satyrus ferula;0.981324344453409;  
EZHBA559-07;Lepidoptera;Polyommatus damon;NA;0.006;Polyommatus damone;0.987572346924968;  
EZHBA560-07;Lepidoptera;Melitaea didyma;NA;NA;Melitaea latonigena;0.998520661242043;  
EZHBA561-07;Lepidoptera;Melitaea didyma;NA;0.047;Melitaea latonigena;0.996493345168523;  
EZHBA567-07;Lepidoptera;Euphydryas intermedia;NA;NA;Euphydryas intermedia;0.948800493926842;  
EZHBA589-07;Lepidoptera;Erebia pandrose;Erebia pandrose;1;Erebia pandrose;0.991059440949696;  
EZHBA602-07;Lepidoptera;Aglais urticae;Aglais urticae;0.001;Aglais urticae;0.990690600684087;  
EZHBA614-07;Lepidoptera;Argynnis paphia;Argynnis paphia;1;Argynnis paphia;0.999999991389927;  
EZHBA618-07;Lepidoptera;Celastrina argiolus;Celastrina argiolus;1;Celastrina  
argiolus;0.999527385150531;  
EZHBA623-07;Lepidoptera;Argynnis paphia;Argynnis paphia;1;Argynnis paphia;0.999999991389927;  
EZHBA624-07;Lepidoptera;Thymelicus lineola;Thymelicus lineola;0.997;Thymelicus  
lineola;0.999986912199643;  
EZHBA625-07;Lepidoptera;Issoria lathonia;Issoria lathonia;1;Issoria lathonia;0.99999999989257;  
EZHBA629-07;Lepidoptera;Gonepteryx rhamni;Gonepteryx rhamni;0.008;Gonepteryx  
rhamni;0.999527533936108;  
EZHBA631-07;Lepidoptera;Hyponephele lycaon;Hyponephele lycaon;1;Hyponephele  
lycaon;0.999313352955397;  
EZHBA636-07;Lepidoptera;Chazara briseis;Chazara briseis;1;Chazara briseis;0.962546535505063;  
EZHBA637-07;Lepidoptera;Pieris napi;NA;NA;Pontia edusa;0.999987430880858;  
EZHBA639-07;Lepidoptera;Plebejus argus;NA;NA;NA;0.958175512956666;  
EZHBA641-07;Lepidoptera;Hyponephele lycaon;Hyponephele lycaon;1;Hyponephele  
lycaon;0.999999999877474;  
EZHBA643-07;Lepidoptera;Arethusana arethusa;NA;0.055;Arethusana arethusa;0.999975657084744;  
EZHBA651-07;Lepidoptera;Polyommatus damon;Polyommatus damon;1;Polyommatus  
damon;0.99999832375622;  
EZHBA652-07;Lepidoptera;Boloria euphrosyne;Boloria euphrosyne;0.001;Boloria  
euphrosyne;0.999983620845843;  
EZHBA656-07;Lepidoptera;Pieris napi;NA;0.487;Colias hyale;0.999917608048945;  
EZHBA663-07;Lepidoptera;Brenthis daphne;Brenthis daphne;0.003;Brenthis daphne;0.981250390036139;  
EZHBA665-07;Lepidoptera;Plebejus idas;NA;0.001;NA;0.999244503269316;  
EZHBA666-07;Lepidoptera;Plebejus idas;NA;0.001;NA;0.998336170537544;  
EZHBA667-07;Lepidoptera;Plebejus idas;NA;0.001;NA;0.999244503269316;  
EZHBA668-07;Lepidoptera;Plebejus idas;NA;0.001;NA;0.999244503269316;  
EZHBA669-07;Lepidoptera;Plebejus idas;NA;0.005;NA;0.996437398744577;  
EZHBA671-07;Lepidoptera;Plebejus argus;NA;0.001;NA;0.999992802367651;  
EZHBA678-07;Lepidoptera;Cupido minimus;NA;0.002;Cupido minimus;0.998300525877831;  
EZHBA695-07;Lepidoptera;Euphydryas aurinia;NA;0.079;Euphydryas aurinia;0.898458207627416;  
EZHBA709-07;Lepidoptera;Pieris napi;NA;NA;100.000.000.000.001;  
EZHBA711-07;Lepidoptera;Polyommatus icarus;NA;0.002;Polyommatus icarus;0.980427239137624;  
EZHBA725-07;Lepidoptera;Callophrys rubi;NA;0.002;Callophrys rubi;0.996854375168945;  
EZHBA726-07;Lepidoptera;Callophrys rubi;NA;0.002;Callophrys rubi;0.996854375168945;  
EZHBA727-07;Lepidoptera;Callophrys rubi;NA;0.002;Callophrys rubi;0.997253508922544;  
EZHBA728-07;Lepidoptera;Araschnia levana;Araschnia levana;1;Araschnia levana;0.9999996225348;  
EZHBA729-07;Lepidoptera;Araschnia levana;Araschnia levana;1;Araschnia levana;0.999999757979766;  
EZHBA730-07;Lepidoptera;Araschnia levana;Araschnia levana;1;Araschnia levana;0.999999757979766;  
EZHBA732-07;Lepidoptera;Pieris rapae;Pieris rapae;NA;Pieris rapae;0.999994908102199;  
EZHBA733-07;Lepidoptera;Pieris rapae;NA;NA;Pieris rapae;0.999953011121959;



EZHBA734-07;Lepidoptera;Coenonympha pamphilus;Coenonympha pamphilus;1;Coenonympha  
pamphilus;0.99999999999687;  
EZHBA735-07;Lepidoptera;Coenonympha pamphilus;Coenonympha pamphilus;1;Coenonympha  
pamphilus;0.99999999999602;  
EZHBA736-07;Lepidoptera;Pieris rapae;NA;0.022;Pontia edusa;0.99997255838741;  
EZHBA744-07;Lepidoptera;Hyponephele lycaon;Hyponephele lycaon;1;Hyponephele  
lycaon;0.999999999131063;  
EZHBA756-07;Lepidoptera;Aporia crataegi;NA;NA;Aporia crataegi;0.999995760621692;  
EZHBA757-07;Lepidoptera;Aporia crataegi;NA;NA;Aporia crataegi;0.999995760621692;  
EZHBA758-07;Lepidoptera;Limenitis populi;Limenitis populi;1;Limenitis populi;0.999999993386808;  
EZHBA766-07;Lepidoptera;Brenthis ino;Brenthis ino;0.001;Brenthis ino;0.995262064014781;  
EZHBA767-07;Lepidoptera;Brenthis ino;Brenthis ino;0.001;Brenthis ino;0.995262064014781;  
EZHBA768-07;Lepidoptera;Issoria lathonia;Issoria lathonia;1;Issoria lathonia;0.99999999987949;  
EZHBA769-07;Lepidoptera;Plebejus argus;NA;0.321;Plebejus argus;0.961323643580747;  
EZHBA770-07;Lepidoptera;Plebejus argus;NA;0.421;Plebejus argus;0.940147304682971;  
EZHBA776-07;Lepidoptera;Lasiommata maera;Lasiommata maera;1;Lasiommata maera;0.999940541293278;  
EZHBA777-07;Lepidoptera;Lasiommata maera;Lasiommata maera;1;Lasiommata maera;0.999998059696345;  
EZHBA778-07;Lepidoptera;Lasiommata maera;Lasiommata maera;1;Lasiommata maera;0.999998059696345;  
EZHBA779-07;Lepidoptera;Lasiommata maera;Lasiommata maera;1;Lasiommata maera;0.99999556477077;  
EZHBA780-07;Lepidoptera;Lasiommata maera;Lasiommata maera;1;Lasiommata maera;0.999999064930119;  
EZHBA817-07;Lepidoptera;Pieris napi;NA;NA;Euchloe creusa;0.999995578632533;  
EZHBA827-07;Lepidoptera;Erebia medusa;NA;0.009;Erebia medusa;0.986275612856827;  
EZHBA828-07;Lepidoptera;Erebia medusa;NA;0.009;Erebia medusa;0.986275612856827;  
EZHBA844-07;Lepidoptera;Boloria euphrosyne;Boloria euphrosyne;0.005;Boloria  
euphrosyne;0.999947951173974;  
EZHBA845-07;Lepidoptera;Boloria euphrosyne;Boloria euphrosyne;0.001;Boloria  
euphrosyne;0.999985020608944;  
EZHBA846-07;Lepidoptera;Boloria euphrosyne;Boloria euphrosyne;0.001;Boloria  
euphrosyne;0.999985020608944;  
EZHBA883-07;Lepidoptera;Boloria thore;Boloria thore;1;Boloria thore;0.999877250611715;  
EZHBA886-07;Lepidoptera;Pyrgus alveus;NA;NA;Pyrgus alveus;0.890529793922276;  
EZHBA887-07;Lepidoptera;Pyrgus alveus;NA;NA;Pyrgus alveus;0.910320969135436;  
EZHBA888-07;Lepidoptera;Pyrgus alveus;NA;NA;Pyrgus alveus;0.890529793922276;  
EZHBA889-07;Lepidoptera;Pyrgus alveus;NA;NA;Pyrgus alveus;0.890529793922276;  
EZHBA890-07;Lepidoptera;Pyrgus alveus;NA;NA;Pyrgus alveus;0.890529793922276;  
EZHBA891-07;Lepidoptera;Pyrgus alveus;NA;NA;Pyrgus alveus;0.890529793922276;  
EZSPC017-09;Lepidoptera;Pyrgus serratulae;Pyrgus serratulae;1;Pyrgus  
serratulae;0.99999989567508;  
EZSPC099-09;Lepidoptera;Pyrgus armoricanus;Pyrgus armoricanus;1;Pyrgus  
armoricanus;0.998895076657973;  
EZSPC120-09;Lepidoptera;Pyrgus armoricanus;Pyrgus armoricanus;1;Pyrgus  
armoricanus;0.998895076657973;  
EZSPC121-09;Lepidoptera;Pyrgus armoricanus;Pyrgus armoricanus;1;Pyrgus  
armoricanus;0.998895076657973;  
EZSPC122-09;Lepidoptera;Pyrgus armoricanus;Pyrgus armoricanus;1;Pyrgus  
armoricanus;0.998895076657973;  
EZSPC123-09;Lepidoptera;Pyrgus armoricanus;Pyrgus armoricanus;1;Pyrgus  
armoricanus;0.998895076657973;  
EZSPC144-09;Lepidoptera;Pyrgus armoricanus;Pyrgus armoricanus;1;Pyrgus  
armoricanus;0.998895076657973;  
EZSPC145-09;Lepidoptera;Pyrgus armoricanus;Pyrgus armoricanus;1;Pyrgus  
armoricanus;0.998895076657973;  
EZSPC146-09;Lepidoptera;Pyrgus armoricanus;Pyrgus armoricanus;1;Pyrgus  
armoricanus;0.998895076657973;  
FJ428801;Lepidoptera;Polyommatus icarus;NA;NA;NA;0.999999509666107;  
FJ428802;Lepidoptera;Polyommatus icarus;NA;NA;NA;0.999999509666107;  
FJ428803;Lepidoptera;Polyommatus icarus;NA;NA;NA;0.999999509666107;  
FJ428806;Lepidoptera;Polyommatus eros;NA;0.001;NA;0.99999798124352;  
FJ428808;Lepidoptera;Polyommatus eros;NA;0.001;NA;0.99999798124352;  
FJ428809;Lepidoptera;Polyommatus eros;NA;0.001;NA;0.999996856346662;  
FJ428817;Lepidoptera;Polyommatus icarus;NA;0.004;Polyommatus icarus;0.787321449983069;  
FJ428818;Lepidoptera;Polyommatus icarus;NA;0.001;Polyommatus icarus;0.75979356402232;  
FJ428819;Lepidoptera;Polyommatus icarus;NA;0.001;Polyommatus icarus;0.773101494790543;  
FJ428820;Lepidoptera;Polyommatus icarus;NA;NA;NA;0.999999509666107;  
FJ428821;Lepidoptera;Polyommatus icarus;NA;0.001;Polyommatus icarus;0.748264214277749;  
FJ428822;Lepidoptera;Polyommatus icarus;NA;NA;NA;0.999999509666107;  
FJ428825;Lepidoptera;Polyommatus icarus;NA;0.003;NA;0.9999992766227;  
FJ435341;Lepidoptera;Polyommatus eros;NA;0.001;Polyommatus erotides;0.76185179953082;  
FJ628423;Lepidoptera;Erebia euryale;NA;NA;Erebia euryale;0.885865842941319;  
FJ628424;Lepidoptera;Erebia euryale;NA;NA;Erebia euryale;0.887705354255096;  
FJ628425;Lepidoptera;Erebia medusa;Erebia medusa;1;Erebia medusa;0.776430243115076;  
FJ628426;Lepidoptera;Erebia medusa;NA;0.012;NA;0.99999999065301;  
FJ628427;Lepidoptera;Erebia manto;Erebia manto;1;Erebia manto;0.931687947306853;  
FJ628428;Lepidoptera;Erebia euryale;NA;NA;Erebia euryale;0.887705354255096;  
FJ628429;Lepidoptera;Erebia manto;Erebia manto;1;Erebia manto;0.941275656507444;  
FJ628432;Lepidoptera;Erebia epiphron;Erebia epiphron;1;Erebia serotina;0.770552571202559;  
FJ628433;Lepidoptera;Erebia epiphron;NA;0.198;Erebia serotina;0.759927913749334;  
FJ628435;Lepidoptera;Erebia pronoe;Erebia pronoe;1;Erebia pronoe;0.980058449947045;

FJ628436;Lepidoptera;Erebia pandrose;NA;NA;NA;0.992852600839316;  
 FJ628437;Lepidoptera;Erebia euryale;NA;NA;Erebia euryale;0.887705354255096;  
 FJ628438;Lepidoptera;Erebia euryale;Erebia euryale;0.001;Erebia euryale;0.995143815428805;  
 FJ628439;Lepidoptera;Erebia pronoe;Erebia pronoe;1;Erebia pronoe;0.980792957115092;  
 FJ628440;Lepidoptera;Erebia euryale;NA;NA;Erebia euryale;0.887705354255096;  
 FJ628442;Lepidoptera;Erebia euryale;NA;NA;Erebia euryale;0.887705354255096;  
 FJ628443;Lepidoptera;Erebia euryale;Erebia euryale;NA;Erebia euryale;0.992102328748505;  
 FJ628444;Lepidoptera;Erebia medusa;NA;0.009;Erebia polaris;0.841187497895335;  
 FJ628445;Lepidoptera;Erebia medusa;Erebia medusa;0.006;NA;0.999999997702201;  
 FJ628446;Lepidoptera;Erebia medusa;NA;0.012;NA;0.999999999065301;  
 FJ628447;Lepidoptera;Erebia pharte;Erebia pharte;1;Erebia pharte;0.999994865861956;  
 FJ663212;Lepidoptera;Aglais urticae;Aglais urticae;0.996;Aglais urticae;0.86007262958937;  
 FJ663213;Lepidoptera;Aglais urticae;Aglais urticae;0.002;Aglais urticae;0.904340834515854;  
 FJ663252;Lepidoptera;Agriades orbitulus sajana;NA;NA;Agriades orbitulus;0.978209678948238;  
 FJ663253;Lepidoptera;Agriades orbitulus sajana;NA;NA;Agriades orbitulus;0.978209678948238;  
 FJ663264;Lepidoptera;Apatura ilia;NA;0.039;Apatura ilia;0.977274423026401;  
 FJ663265;Lepidoptera;Apatura ilia;Apatura ilia;0.018;Apatura ilia;0.978454420945423;  
 FJ663283;Lepidoptera;Araschnia levana;Araschnia levana;1;Araschnia levana;0.999999772187832;  
 FJ663284;Lepidoptera;Araschnia levana;Araschnia levana;1;Araschnia levana;0.999999772187832;  
 FJ663334;Lepidoptera;Boloria napaea;NA;0.152;Boloria napaea;0.81642421149858;  
 FJ663336;Lepidoptera;Brenthis daphne;Brenthis daphne;0.004;Brenthis daphne;0.969469542867473;  
 FJ663337;Lepidoptera;Brenthis ino;Brenthis ino;0.001;Brenthis ino;0.994711912827522;  
 FJ663338;Lepidoptera;Brenthis ino;Brenthis ino;0.001;Brenthis ino;0.994711912827522;  
 FJ663364;Lepidoptera;Boloria euphrosyne;Boloria euphrosyne;1;Boloria euphrosyne;0.9999883312184;  
 FJ663365;Lepidoptera;Boloria euphrosyne;Boloria euphrosyne;1;Boloria euphrosyne;0.999970074469922;  
 FJ663412;Lepidoptera;Colias crocea;NA;0.059;NA;0.99999999999738;  
 FJ663413;Lepidoptera;Colias crocea;NA;0.059;NA;0.99999999999738;  
 FJ663414;Lepidoptera;Colias crocea;NA;0.059;NA;0.99999999999738;  
 FJ663418;Lepidoptera;Colias hyale;NA;0.488;Colias hyale;0.999915488936852;  
 FJ663439;Lepidoptera;Cupido minimus;NA;0.002;Cupido minimus;0.991793750212648;  
 FJ663440;Lepidoptera;Cupido minimus;NA;0.019;Cupido minimus;0.997099017544134;  
 FJ663441;Lepidoptera;Cupido minimus;NA;0.008;Cupido minimus;0.999818742396574;  
 FJ663445;Lepidoptera;Cupido osiris;Cupido osiris;1;Cupido osiris;0.999999477553951;  
 FJ663516;Lepidoptera;Erebia pandrose;Erebia pandrose;0.006;Erebia pandrose;0.995149791063603;  
 FJ663563;Lepidoptera;Cupido argiades;NA;0.499;NA;0.999999999984682;  
 FJ663564;Lepidoptera;Cupido argiades;NA;0.499;NA;0.999999999984682;  
 FJ663572;Lepidoptera;Favonius quercus;NA;NA;NA;0.999999999996153;  
 FJ663573;Lepidoptera;Favonius quercus;NA;NA;NA;0.999999999996893;  
 FJ663594;Lepidoptera;Gonepteryx rhamni;NA;0.181;Gonepteryx rhamni;0.985430786358543;  
 FJ663595;Lepidoptera;Gonepteryx rhamni;NA;0.474;Gonepteryx rhamni;0.982076396127858;  
 FJ663596;Lepidoptera;Lycaena tityrus;Lycaena tityrus;1;Lycaena tityrus;0.999998928238034;  
 FJ663686;Lepidoptera;Issoria lathonia;Issoria lathonia;1;Issoria lathonia;0.99999999962967;  
 FJ663724;Lepidoptera;Limenitis camilla;Limenitis camilla;0.009;Limenitis camilla;0.9999828626808;  
 FJ663725;Lepidoptera;Limenitis camilla;NA;0.054;Limenitis camilla;0.99998730864279;  
 FJ663736;Lepidoptera;Helleia helle;Lycaena helle;1;Lycaena helle;0.999999984510879;  
 FJ663737;Lepidoptera;Helleia helle;Lycaena helle;1;Lycaena helle;0.999999984510879;  
 FJ663738;Lepidoptera;Lycaena phlaeas;Lycaena phlaeas;1;Lycaena phlaeas;0.999999996363186;  
 FJ663739;Lepidoptera;Lycaena phlaeas;Lycaena phlaeas;1;Lycaena phlaeas;0.9999999859225;  
 FJ663749;Lepidoptera;Lysandra coridon;NA;NA;Lysandra coridon;0.754269905766234;  
 FJ663750;Lepidoptera;Lysandra coridon;Lysandra coridon;NA;Lysandra coridon;0.735779770406819;  
 FJ663756;Lepidoptera;Maniola jurtina;NA;0.005;Maniola jurtina;0.714129421849189;  
 FJ663757;Lepidoptera;Maniola jurtina;NA;0.161;NA;0.99999999999418;  
 FJ663758;Lepidoptera;Maniola jurtina;NA;0.038;NA;0.99999999999524;  
 FJ663759;Lepidoptera;Maniola jurtina;NA;0.01;NA;0.999999999998599;  
 FJ663760;Lepidoptera;Maniola jurtina;NA;0.038;NA;0.99999999999524;  
 FJ663769;Lepidoptera;Polyommatus daphnis;NA;0.001;Polyommatus daphnis;0.942172634976058;  
 FJ663770;Lepidoptera;Polyommatus daphnis;NA;0.001;Polyommatus daphnis;0.994093721308241;  
 FJ663771;Lepidoptera;Polyommatus daphnis;Polyommatus daphnis;0.008;Polyommatus daphnis;0.997264841617925;  
 FJ663772;Lepidoptera;Polyommatus daphnis;NA;0.098;Polyommatus daphnis;0.996542893341734;  
 FJ663773;Lepidoptera;Polyommatus daphnis;NA;0.001;Polyommatus daphnis;0.942172634976058;  
 FJ663784;Lepidoptera;Melitaea cinxia;Melitaea cinxia;0.021;Melitaea cinxia;0.99999999999176;  
 FJ663785;Lepidoptera;Melitaea cinxia;Melitaea cinxia;0.05;Melitaea cinxia;0.99999999999119;  
 FJ663854;Lepidoptera;Nymphalis antiopa;NA;0.23;Nymphalis antiopa;0.999999944198096;  
 FJ663885;Lepidoptera;Pararge aegeria;Pararge aegeria;1;Pararge aegeria;0.99999999730363;  
 FJ663932;Lepidoptera;Pieris napi;NA;0.013;Pieris napi;0.798949532876188;  
 FJ663951;Lepidoptera;Plebejus argus;NA;0.048;Plebejus argus;0.982596100749942;  
 FJ663952;Lepidoptera;Plebejus argus;NA;0.044;Plebejus argus;0.975622330747864;  
 FJ663953;Lepidoptera;Plebejus argyrognomon;Plebejus argyrognomon;0.003;Plebejus argyrognomon;0.927010765218643;  
 FJ663954;Lepidoptera;Plebejus argyrognomon;NA;0.001;Plebejus argyrognomon;0.822886398456556;  
 FJ663955;Lepidoptera;Plebejus argyrognomon;NA;0.002;NA;0.998323393743912;  
 FJ663956;Lepidoptera;Plebejus argyrognomon;NA;0.001;NA;0.997791535991658;  
 FJ663957;Lepidoptera;Plebejus argyrognomon;NA;0.001;NA;0.998508017873438;  
 FJ663958;Lepidoptera;Plebejus argyrognomon;NA;0.001;NA;0.994620093546684;  
 FJ663959;Lepidoptera;Plebejus argyrognomon;NA;0.001;NA;0.994620093546684;

FJ663976;Lepidoptera;Nymphalis c-album;NA;0.085;NA;0.999999279624904;  
FJ663977;Lepidoptera;Nymphalis c-album;NA;0.215;NA;0.999999192918557;  
FJ663978;Lepidoptera;Nymphalis c-album;NA;0.215;NA;0.999999192918557;  
FJ663979;Lepidoptera;Nymphalis c-album;NA;0.215;NA;0.999999192918557;  
FJ664034;Lepidoptera;Satyrus ferula;Satyrus ferula;0.001;Satyrus ferula;0.993398569985402;  
FJ664047;Lepidoptera;Thecla betulae;Thecla betulae;1;Thecla betulae;0.99999999967031;  
FJ664048;Lepidoptera;Thecla betulae;Thecla betulae;1;Thecla betulae;0.99999999889212;  
FJ664075;Lepidoptera;Agriades optilete;Agriades optilete;1;Agriades optilete;0.999999990133006;  
FJ664076;Lepidoptera;Agriades optilete;Agriades optilete;1;Agriades optilete;0.999999990133006;  
FJ664077;Lepidoptera;Agriades optilete;Agriades optilete;1;Agriades optilete;0.99999999183251;  
FJ664078;Lepidoptera;Vanessa atalanta;Vanessa atalanta;1;Vanessa atalanta;0.99999999739629;  
FJ664079;Lepidoptera;Vanessa atalanta;Vanessa atalanta;1;Vanessa atalanta;0.99999999673548;  
FJ938179;Lepidoptera;Erebia medusa;NA;0.009;Erebia medusa;0.986275612856827;  
FJ938180;Lepidoptera;Erebia medusa;NA;0.035;Erebia medusa;0.984273665813791;  
FJ938181;Lepidoptera;Erebia medusa;NA;0.009;Erebia medusa;0.986275612856827;  
FJ938182;Lepidoptera;Erebia medusa;NA;0.009;Erebia medusa;0.986275612856827;  
FJ938183;Lepidoptera;Erebia medusa;NA;0.04;Erebia medusa;0.984042649596477;  
FJ938184;Lepidoptera;Erebia medusa;NA;0.022;Erebia medusa;0.986197124545351;  
FJ938185;Lepidoptera;Erebia medusa;NA;0.009;Erebia medusa;0.986275612856827;  
FJ938186;Lepidoptera;Erebia medusa;NA;0.009;Erebia medusa;0.986275612856827;  
FJ938187;Lepidoptera;Erebia medusa;NA;0.04;Erebia medusa;0.984042649596477;  
FJ938188;Lepidoptera;Erebia medusa;NA;0.009;Erebia medusa;0.986275612856827;  
FJ938189;Lepidoptera;Erebia medusa;NA;0.016;Erebia medusa;0.988942863975822;  
FJ938190;Lepidoptera;Erebia medusa;NA;0.009;Erebia medusa;0.986275612856827;  
FJ938191;Lepidoptera;Erebia medusa;NA;0.04;Erebia medusa;0.984042649596477;  
FJ938192;Lepidoptera;Erebia oeme;NA;0.031;Erebia oeme;0.99999999935056;  
FJ938193;Lepidoptera;Erebia oeme;Erebia oeme;0.005;Erebia oeme;0.99999999877474;  
FJ938194;Lepidoptera;Erebia oeme;Erebia oeme;0.003;Erebia oeme;0.999999999681421;  
FJ938195;Lepidoptera;Erebia oeme;Erebia oeme;0.003;Erebia oeme;0.999999999681421;  
FJ938196;Lepidoptera;Erebia oeme;Erebia oeme;0.003;Erebia oeme;0.999999999681421;  
FJ943961;Lepidoptera;Lysandra coridon;Lysandra coridon;NA;NA;0.997782410243321;  
FN601259;Lepidoptera;Callophrys rubi;NA;0.001;NA;0.999999982170419;  
FN601260;Lepidoptera;Callophrys rubi;NA;0.001;NA;0.999999982170419;  
FN601274;Lepidoptera;Callophrys avis;NA;0.001;NA;0.807759286975261;  
FN601282;Lepidoptera;Callophrys rubi;NA;0.001;Callophrys rubi;0.705657102729907;  
FN601285;Lepidoptera;Callophrys rubi;NA;0.001;NA;0.999999982170419;  
FN601301;Lepidoptera;Callophrys rubi;NA;0.001;NA;0.999999982170419;  
FN601308;Lepidoptera;Callophrys rubi;NA;0.001;NA;0.999999982170419;  
FN601312;Lepidoptera;Callophrys rubi;NA;0.001;NA;0.999999982170419;  
FN601319;Lepidoptera;Callophrys rubi;NA;0.001;NA;0.999999982170419;  
FN601329;Lepidoptera;Callophrys rubi;NA;0.001;NA;0.999999982170419;  
FN601330;Lepidoptera;Callophrys rubi;NA;0.001;NA;0.999999982170419;  
FR989949.1;Lepidoptera;Plebejus argus;NA;0.123;Plebejus argus;0.980927835351298;  
FR990065.1;Lepidoptera;Glaucopsyche alexis;NA;NA;Glaucopsyche alexis;0.991019528246159;  
FR990152.1;Lepidoptera;Ochlodes sylvanus;NA;0.108;Ochlodes sylvanus;0.996827249893169;  
GBLAA1157-15;Lepidoptera;Cyraniris semiargus;NA;NA;Cyraniris semiargus;0.999051841766953;  
GBLAA1166-15;Lepidoptera;Thymelicus sylvestris;Thymelicus sylvestris;1;Thymelicus sylvestris;0.99999997998853;  
GBLAA1167-15;Lepidoptera;Thymelicus sylvestris;Thymelicus sylvestris;1;Thymelicus sylvestris;0.999999981568351;  
GBLAA133-14;Lepidoptera;Maniola jurtina;NA;NA;NA;0.99999999991;  
GBLAA372-14;Lepidoptera;Aphantopus hyperantus;Aphantopus hyperantus;0.004;Aphantopus hyperantus;0.999598909345147;  
GBLAA407-14;Lepidoptera;Thymelicus lineola;Thymelicus lineola;1;Thymelicus lineola;0.999945767337001;  
GBLAB121-13;Lepidoptera;Aricia agestis;NA;0.253;Aricia agestis;0.996350017387504;  
GBLAB123-13;Lepidoptera;Polyommatus icarus;NA;0.001;Polyommatus icarus;0.984622665164294;  
GBLAB137-13;Lepidoptera;Thymelicus sylvestris;Thymelicus sylvestris;1;Thymelicus sylvestris;0.99999985935205;  
GBLAB138-13;Lepidoptera;Thymelicus lineola;Thymelicus lineola;1;Thymelicus lineola;0.99992304433643;  
GBLAB144-13;Lepidoptera;Aphantopus hyperantus;Aphantopus hyperantus;0.004;Aphantopus hyperantus;0.999598909345147;  
GBLAB145-13;Lepidoptera;Maniola jurtina;NA;NA;NA;0.99999999991;  
GBLAB149-13;Lepidoptera;Coenonympha arcania;NA;0.172;Coenonympha arcania;0.963036309473038;  
GBLAB318-13;Lepidoptera;Melitaea cinxia;Melitaea cinxia;1;Melitaea cinxia;0.99999999999858;  
GBLAC266-13;Lepidoptera;Polyommatus icarus;NA;0.001;Polyommatus icarus;0.96905816849887;  
GBLAC281-13;Lepidoptera;Thymelicus sylvestris;NA;0.324;Thymelicus sylvestris;0.999940778442454;  
GBLAC282-13;Lepidoptera;Thymelicus lineola;Thymelicus lineola;1;Thymelicus lineola;0.99993723282816;  
GBLAC941-13;Lepidoptera;Pieris napi;NA;NA;Pieris napi;0.807328036910527;  
GBLAD064-14;Lepidoptera;Pieris napi;NA;0.028;Pieris napi;0.888205720664699;  
GBLAD096-14;Lepidoptera;Pieris napi;NA;0.011;Pieris napi;0.801985394724814;  
GBLAD098-14;Lepidoptera;Maniola jurtina;NA;0.074;NA;0.99999999996465;  
GBLAD101-14;Lepidoptera;Aphantopus hyperantus;Aphantopus hyperantus;1;Aphantopus hyperantus;0.999998423174411;  
GBLAD257-14;Lepidoptera;Boloria euphrosyne;Boloria euphrosyne;0.999;Boloria euphrosyne;0.999987921564426;

GBLAD931-14;Lepidoptera;Pieris napi;NA;0.011;Pieris napi;0.801985394724814;  
GBLAD949-14;Lepidoptera;Pyrgus cacaliae;Pyrgus cacaliae;0.001;Pyrgus cacaliae;0.99354498208327;  
GBLAF147-14;Lepidoptera;Polyommatus icarus;Polyommatus icarus;0.001;Polyommatus  
icarus;0.999848859399272;  
GBLAF396-14;Lepidoptera;Pieris napi;NA;0.028;Pieris napi;0.888205720664699;  
GBLAF397-14;Lepidoptera;Aphantopus hyperantus;Aphantopus hyperantus;0.004;Aphantopus  
hyperantus;0.999598909345147;  
GBLAF778-14;Lepidoptera;Aricia agestis;NA;0.067;Aricia agestis;0.999509743227786;  
GMBMR047-17;Lepidoptera;Pieris rapae;NA;NA;Pieris rapae;0.999943665698249;  
GMBUA102-14;Lepidoptera;Lasiommata maera;Lasiommata maera;1;Lasiommata maera;0.999995059298625;  
GMBUB1924-14;Lepidoptera;Hamearis lucina;NA;NA;Hamearis lucina;0.99999999841009;  
GMBUB1935-14;Lepidoptera;Satyrium pruni;NA;0.486;Satyrium pruni;0.988466558320733;  
GMBUD002-14;Lepidoptera;Brintesia circe;Brintesia circe;1;Brintesia circe;0.999999511269385;  
GMBUD003-14;Lepidoptera;Maniola jurtina;NA;0.001;NA;0.99999999874528;  
GMBUD007-14;Lepidoptera;Maniola jurtina;NA;0.007;NA;0.99999999950132;  
GMBUD008-14;Lepidoptera;Lasiommata megera;Lasiommata megera;1;Lasiommata  
megera;0.999969474203344;  
GMBUD009-14;Lepidoptera;Pieris rapae;NA;0.121;Pieris rapae;0.999977523517787;  
GMBUD010-14;Lepidoptera;Lasiommata megera;Lasiommata megera;1;Lasiommata  
megera;0.99996665008664;  
GMBUD013-14;Lepidoptera;Maniola jurtina;NA;0.001;NA;0.9999999995215;  
GMBUD014-14;Lepidoptera;Maniola jurtina;NA;0.004;NA;0.99999999974408;  
GMBUD125-14;Lepidoptera;Maniola jurtina;NA;0.006;NA;0.99999999971332;  
GMBUD128-14;Lepidoptera;Coenonympha pamphilus;Coenonympha pamphilus;1;Coenonympha  
pamphilus;0.99999999978996;  
GMBUD129-14;Lepidoptera;Ochlodes sylvanus;NA;NA;Ochlodes sylvanus;0.994343320156993;  
GMBUD131-14;Lepidoptera;Maniola jurtina;NA;0.009;NA;0.99999999976504;  
GMBUD134-14;Lepidoptera;Aphantopus hyperantus;Aphantopus hyperantus;0.019;Aphantopus  
hyperantus;0.999994626926675;  
GMBUD135-14;Lepidoptera;Lasiommata megera;Lasiommata megera;0.999;Lasiommata  
megera;0.999966844083951;  
GMBUD136-14;Lepidoptera;Aphantopus hyperantus;Aphantopus hyperantus;0.003;Aphantopus  
hyperantus;0.99998902508542;  
GMBUD137-14;Lepidoptera;Maniola jurtina;NA;0.009;NA;0.99999999976504;  
GMBUD138-14;Lepidoptera;Aphantopus hyperantus;Aphantopus hyperantus;0.003;Aphantopus  
hyperantus;0.99998902508542;  
GMBUE016-14;Lepidoptera;Plebejus argus;NA;0.126;Plebejus argus;0.981193877291878;  
GMBUE047-14;Lepidoptera;Coenonympha pamphilus;Coenonympha pamphilus;1;Coenonympha  
pamphilus;0.99999999977632;  
GMBUE052-14;Lepidoptera;Coenonympha pamphilus;Coenonympha pamphilus;1;Coenonympha  
pamphilus;0.9999999995083;  
GMBUE053-14;Lepidoptera;Lasiommata megera;Lasiommata megera;1;Lasiommata  
megera;0.999969653368234;  
GMBUF002-14;Lepidoptera;Coenonympha pamphilus;Coenonympha pamphilus;1;Coenonympha  
pamphilus;0.99999999982208;  
GMBUF081-14;Lepidoptera;Coenonympha pamphilus;Coenonympha pamphilus;1;Coenonympha  
pamphilus;0.99999999994742;  
GMBUG001-14;Lepidoptera;Maniola jurtina;NA;0.009;NA;0.99999999976504;  
GMBUG002-14;Lepidoptera;Maniola jurtina;NA;0.001;NA;0.99999999946141;  
GMBUG003-14;Lepidoptera;Arethusana arethusa;NA;0.488;Arethusana arethusa;0.937870288270298;  
GMBUG022-14;Lepidoptera;Coenonympha pamphilus;Coenonympha pamphilus;1;Coenonympha  
pamphilus;0.99999999983373;  
GMBUG2254-14;Lepidoptera;Lasiommata maera;Lasiommata maera;1;Lasiommata maera;0.999996028148232;  
GMGMA487-14;Lepidoptera;Celastrina argiolus;Celastrina argiolus;1;Celastrina  
argiolus;0.999330495887851;  
GMGMA491-14;Lepidoptera;Celastrina argiolus;Celastrina argiolus;0.997;Celastrina  
argiolus;0.99933493633429;  
GMGMA501-14;Lepidoptera;Thymelicus sylvestris;Thymelicus sylvestris;1;Thymelicus  
sylvestris;0.99999924993293;  
GMGMA518-14;Lepidoptera;Celastrina argiolus;Celastrina argiolus;0.997;Celastrina  
argiolus;0.999579184234861;  
GMGMA529-14;Lepidoptera;Thymelicus sylvestris;Thymelicus sylvestris;1;Thymelicus  
sylvestris;0.99999762854258;  
GMGMA536-14;Lepidoptera;Maniola jurtina;NA;0.003;NA;0.999999999430614;  
GMGMB017-14;Lepidoptera;Celastrina argiolus;Celastrina argiolus;0.999;Celastrina  
argiolus;0.999636359687375;  
GMGMB018-14;Lepidoptera;Celastrina argiolus;Celastrina argiolus;0.999;Celastrina  
argiolus;0.999622090292273;  
GMGMB019-14;Lepidoptera;Celastrina argiolus;Celastrina argiolus;0.999;Celastrina  
argiolus;0.999636359687375;  
GMGMB470-14;Lepidoptera;Celastrina argiolus;Celastrina argiolus;1;Celastrina  
argiolus;0.999686094051245;  
GMGMC014-14;Lepidoptera;Celastrina argiolus;Celastrina argiolus;1;Celastrina  
argiolus;0.999686094051245;  
GMGMC027-14;Lepidoptera;Thymelicus sylvestris;Thymelicus sylvestris;1;Thymelicus  
sylvestris;0.999999950165774;  
GMGMC030-14;Lepidoptera;Vanessa cardui;Vanessa cardui;1;Vanessa cardui;0.999999257400808;

GMGMC239-14;Lepidoptera;Lasiommata megera;Lasiommata megera;1;Lasiommata megera;0.999966948144719;  
GMGMC240-14;Lepidoptera;Maniola jurtina;NA;NA;NA;0.99999998961499;  
GMGMC250-14;Lepidoptera;Celastrina argiolus;Celastrina argiolus;0.999;Celastrina argiolus;0.999666716978783;  
GMGMH1425-14;Lepidoptera;Araschnia levana;Araschnia levana;1;Araschnia levana;0.99999832664983;  
GMGMH1431-14;Lepidoptera;Lasiommata megera;Lasiommata megera;1;Lasiommata megera;0.999970342842984;  
GMGMI201-14;Lepidoptera;Lasiommata megera;Lasiommata megera;0.999;Lasiommata megera;0.999966844083951;  
GMGMI210-14;Lepidoptera;Lasiommata megera;Lasiommata megera;0.999;Lasiommata megera;0.999966844083951;  
GMGMI217-14;Lepidoptera;Pararge aegeria;Pararge aegeria;1;Pararge aegeria;0.99999999959414;  
GMGMI218-14;Lepidoptera;Lasiommata megera;Lasiommata megera;0.999;Lasiommata megera;0.999966844083951;  
GMGMI229-14;Lepidoptera;Lasiommata megera;Lasiommata megera;1;Lasiommata megera;0.99996665008664;  
GMGMJ032-14;Lepidoptera;Satyrium pruni;NA;0.497;Satyrium pruni;0.989233904372907;  
GMGMJ033-14;Lepidoptera;Lasiommata megera;Lasiommata megera;1;Lasiommata megera;0.999975631755706;  
GMGMJ045-14;Lepidoptera;Lasiommata megera;Lasiommata megera;1;Lasiommata megera;0.999969653368234;  
GMGMK191-14;Lepidoptera;Thymelicus sylvestris;Thymelicus sylvestris;1;Thymelicus sylvestris;0.999999949110021;  
GMGMK192-14;Lepidoptera;Maniola jurtina;NA;0.004;NA;0.99999999974408;  
GMGMK193-14;Lepidoptera;Thymelicus sylvestris;Thymelicus sylvestris;1;Thymelicus sylvestris;0.999999949110021;  
GMGML016-14;Lepidoptera;Maniola jurtina;NA;NA;NA;0.99999999997274;  
GMGML017-14;Lepidoptera;Maniola jurtina;NA;0.004;NA;0.99999999865405;  
GMGML020-14;Lepidoptera;Maniola jurtina;NA;0.009;Maniola jurtina;0.939166605292266;  
GMGML021-14;Lepidoptera;Maniola jurtina;NA;0.009;NA;0.99999999976504;  
GMGML022-14;Lepidoptera;Maniola jurtina;NA;0.009;NA;0.99999999976504;  
GMGML025-14;Lepidoptera;Maniola jurtina;NA;0.007;NA;0.99999999941172;  
GMGML026-14;Lepidoptera;Maniola jurtina;NA;NA;NA;0.99999998779753;  
GMGML027-14;Lepidoptera;Maniola jurtina;NA;0.005;Maniola chia;0.741043173259956;  
GMGML028-14;Lepidoptera;Maniola jurtina;Maniola jurtina;0.023;Maniola jurtina;0.877189324384157;  
GMGML029-14;Lepidoptera;Maniola jurtina;NA;0.021;NA;0.99999999949024;  
GMGML031-14;Lepidoptera;Maniola jurtina;NA;NA;NA;0.99999999936473;  
GMGML032-14;Lepidoptera;Maniola jurtina;NA;0.001;NA;0.99999999987881;  
GMGML033-14;Lepidoptera;Maniola jurtina;NA;0.018;NA;0.99999998934134;  
GMGML043-14;Lepidoptera;Thymelicus lineola;Thymelicus lineola;1;Thymelicus lineola;0.999992047013555;  
GMGML046-14;Lepidoptera;Thymelicus lineola;Thymelicus lineola;1;Thymelicus lineola;0.999977655372067;  
GMGML051-14;Lepidoptera;Thymelicus sylvestris;Thymelicus sylvestris;1;Thymelicus sylvestris;0.999999942320842;  
GMGML056-14;Lepidoptera;Thymelicus sylvestris;Thymelicus sylvestris;1;Thymelicus sylvestris;0.999999937939352;  
GMGML063-14;Lepidoptera;Thymelicus sylvestris;Thymelicus sylvestris;1;Thymelicus sylvestris;0.99999996158249;  
GMGMM009-14;Lepidoptera;Maniola jurtina;NA;0.002;Maniola jurtina;0.774995587786062;  
GMGMM012-14;Lepidoptera;Maniola jurtina;NA;0.005;Maniola jurtina;0.946979799614752;  
GMGMM014-14;Lepidoptera;Maniola jurtina;NA;0.003;NA;0.99999999990033;  
GMGMM015-14;Lepidoptera;Maniola jurtina;Maniola jurtina;0.009;Maniola jurtina;0.829226790520797;  
GMGMM016-14;Lepidoptera;Maniola jurtina;NA;0.003;NA;0.99999999990033;  
GMGMM018-14;Lepidoptera;Maniola jurtina;NA;NA;Maniola jurtina;0.704272131898308;  
GMGMM019-14;Lepidoptera;Maniola jurtina;NA;0.116;NA;0.99999999987256;  
GMGMM020-14;Lepidoptera;Maniola jurtina;NA;0.007;NA;0.99999999987721;  
GMGMM021-14;Lepidoptera;Lasiommata megera;Lasiommata megera;1;Lasiommata megera;0.999969474203344;  
GMGMM050-14;Lepidoptera;Lasiommata megera;Lasiommata megera;0.999;Lasiommata megera;0.999949012846764;  
GMGMM058-14;Lepidoptera;Maniola jurtina;NA;0.003;NA;0.99999999990033;  
GMGMM060-14;Lepidoptera;Maniola jurtina;NA;0.003;NA;0.99999999990033;  
GMGMM061-14;Lepidoptera;Maniola jurtina;NA;0.003;NA;0.99999999990033;  
GMGMM062-14;Lepidoptera;Maniola jurtina;NA;0.003;NA;0.99999999990033;  
GMGMM063-14;Lepidoptera;Maniola jurtina;NA;0.003;NA;0.99999999990033;  
GMGMM064-14;Lepidoptera;Lasiommata megera;Lasiommata megera;1;Lasiommata megera;0.999955870837446;  
GMGMM065-14;Lepidoptera;Lasiommata megera;Lasiommata megera;1;Lasiommata megera;0.999939218657025;  
GMGMM067-14;Lepidoptera;Lasiommata megera;Lasiommata megera;1;Lasiommata megera;0.999969474203344;  
GMGMM069-14;Lepidoptera;Maniola jurtina;NA;0.003;NA;0.99999999990033;  
GMGMM070-14;Lepidoptera;Maniola jurtina;NA;0.003;NA;0.99999999990033;  
GMGMM071-14;Lepidoptera;Maniola jurtina;NA;0.003;NA;0.99999999990033;  
GMGMM072-14;Lepidoptera;Maniola jurtina;NA;0.003;NA;0.99999999990033;  
GMGMM073-14;Lepidoptera;Maniola jurtina;NA;0.002;Maniola jurtina;0.860414212487598;

GMGMM074-14;Lepidoptera;Maniola jurtina;NA;0.004;NA;0.99999999974408;  
GMGMM075-14;Lepidoptera;Lasiommata megera;Lasiommata megera;1;Lasiommata  
megera;0.999969653368234;  
GMGMM076-14;Lepidoptera;Maniola jurtina;NA;0.003;NA;0.99999999990033;  
GMGMM077-14;Lepidoptera;Thymelicus sylvestris;Thymelicus sylvestris;1;Thymelicus  
sylvestris;0.9999993699595;  
GMGMM078-14;Lepidoptera;Lasiommata megera;Lasiommata megera;1;Lasiommata  
megera;0.999969474203344;  
GMGMM080-14;Lepidoptera;Maniola jurtina;NA;0.006;NA;0.999999999871436;  
GMGMM088-14;Lepidoptera;Lasiommata megera;Lasiommata megera;1;Lasiommata  
megera;0.999969474203344;  
GMGMM095-14;Lepidoptera;Thymelicus sylvestris;Thymelicus sylvestris;1;Thymelicus  
sylvestris;0.99999938532882;  
GMGMM097-14;Lepidoptera;Maniola jurtina;NA;0.004;NA;0.99999999974408;  
GMGMM052-14;Lepidoptera;Maniola jurtina;NA;0.004;NA;0.99999999974408;  
GMGMM054-14;Lepidoptera;Lasiommata megera;Lasiommata megera;0.001;Lasiommata  
megera;0.999905026489642;  
GMGMM056-14;Lepidoptera;Maniola jurtina;NA;0.009;NA;0.99999999976504;  
GMGMM068-14;Lepidoptera;Lasiommata megera;Lasiommata megera;0.999;Lasiommata  
megera;0.999966844083951;  
GMGMM069-14;Lepidoptera;Issoria lathonia;Issoria lathonia;1;Issoria lathonia;0.99999999987412;  
GMGMM071-14;Lepidoptera;Maniola jurtina;NA;0.008;NA;0.999999999876443;  
GMGMM073-14;Lepidoptera;Pyronia tithonus;Pyronia tithonus;1;Pyronia tithonus;1;  
GMGMM090-14;Lepidoptera;Lasiommata megera;Lasiommata megera;0.999;Lasiommata  
megera;0.999952224561591;  
GMGMM091-14;Lepidoptera;Maniola jurtina;NA;0.009;NA;0.99999999976504;  
GMGMM094-14;Lepidoptera;Maniola jurtina;NA;0.009;NA;0.99999999976504;  
GMGMM096-14;Lepidoptera;Lasiommata megera;Lasiommata megera;0.999;Lasiommata  
megera;0.999966844083951;  
GMGMM097-14;Lepidoptera;Maniola jurtina;NA;0.005;Maniola jurtina;0.934616755277837;  
GMGMM100-14;Lepidoptera;Maniola jurtina;NA;0.001;NA;0.99999999987881;  
GMGMM102-14;Lepidoptera;Maniola jurtina;NA;NA;NA;0.999999999796435;  
GMGMM103-14;Lepidoptera;Maniola jurtina;NA;0.005;Maniola jurtina;0.934616755277837;  
GMGMM104-14;Lepidoptera;Maniola jurtina;NA;0.002;NA;0.999999999903496;  
GMGMM105-14;Lepidoptera;Maniola jurtina;NA;0.002;NA;0.999999999903496;  
GMGMM107-14;Lepidoptera;Maniola jurtina;NA;0.009;NA;0.99999999976504;  
GMGMM108-14;Lepidoptera;Lasiommata megera;Lasiommata megera;1;Lasiommata  
megera;0.999899207286718;  
GMGMM109-14;Lepidoptera;Lasiommata megera;Lasiommata megera;1;Lasiommata  
megera;0.99997012617639;  
GMGMM113-14;Lepidoptera;Lasiommata megera;Lasiommata megera;1;Lasiommata  
megera;0.99996989668155;  
GMGMM117-14;Lepidoptera;Maniola jurtina;NA;0.009;NA;0.99999999976504;  
GMGMM120-14;Lepidoptera;Lasiommata megera;Lasiommata megera;1;Lasiommata  
megera;0.999969653368234;  
GMGMM121-14;Lepidoptera;Maniola jurtina;NA;0.009;NA;0.99999999976504;  
GMGMM124-14;Lepidoptera;Lasiommata megera;Lasiommata megera;1;Lasiommata  
megera;0.999969653368234;  
GMGMM127-14;Lepidoptera;Thymelicus lineola;Thymelicus lineola;1;Thymelicus  
lineola;0.999986878711549;  
GMGMM141-14;Lepidoptera;Lasiommata megera;Lasiommata megera;1;Lasiommata  
megera;0.999973871152596;  
GMGMM143-14;Lepidoptera;Maniola jurtina;NA;0.009;NA;0.99999999976504;  
GMGMM144-14;Lepidoptera;Maniola jurtina;NA;0.009;NA;0.99999999976504;  
GMGMU3192-20;Lepidoptera;Pieris napi;NA;0.017;Pieris napi;0.805583713910701;  
GMGMU3193-20;Lepidoptera;Pieris napi;NA;NA;Pieris napi;0.917869117371985;  
GMGMV2344-20;Lepidoptera;Pieris napi;NA;0.025;Pieris napi;0.890466414022189;  
GMGRE2270-13;Lepidoptera;Lasiommata maera;Lasiommata maera;1;Lasiommata maera;0.999997723969845;  
GMGRE2271-13;Lepidoptera;Lasiommata maera;Lasiommata maera;1;Lasiommata maera;0.999996875417757;  
GMGRE2272-13;Lepidoptera;Lasiommata maera;Lasiommata maera;1;Lasiommata maera;0.999997723969845;  
GMGRF5621-13;Lepidoptera;Lasiommata maera;Lasiommata maera;1;Lasiommata maera;0.999997516733302;  
GMRSF081-14;Lepidoptera;Araschnia levana;Araschnia levana;1;Araschnia levana;0.999999236241685;  
GMRSU120-15;Lepidoptera;Heteropterus morpheus;NA;NA;Heteropterus morpheus;0.99999999999801;  
GMRSW019-15;Lepidoptera;Aphantopus hyperantus;Aphantopus hyperantus;0.002;Aphantopus  
hyperantus;0.99998684236415;  
GQ128942;Lepidoptera;Agriades glandon;Agriades glandon;NA;NA;0.860288767951466;  
GQ128945;Lepidoptera;Agriades orbitulus;NA;0.002;NA;0.934236298474903;  
GQ128947;Lepidoptera;Cupido minimus;NA;0.017;NA;0.878333322986603;  
GQ128953;Lepidoptera;Aricia eumedon;NA;0.487;NA;0.864612642815733;  
GQ128976;Lepidoptera;Lysandra coridon;NA;NA;NA;0.819281743141762;  
GQ129011;Lepidoptera;Agriades optilete optilete;Agriades optilete;1;NA;0.88395019607177;  
GQ200937;Lepidoptera;Melanargia galathea;Melanargia galathea;NA;Melanargia  
galathea;0.981855578470499;  
GQ200938;Lepidoptera;Melanargia galathea;Melanargia galathea;NA;Melanargia  
galathea;0.981855578470499;  
GQ200939;Lepidoptera;Melanargia galathea;Melanargia galathea;NA;Melanargia  
galathea;0.987561356582775;

GQ200940;Lepidoptera;Melanargia galathea;Melanargia galathea;NA;Melanargia galathea;0.987561356582775;  
GQ200942;Lepidoptera;Melanargia galathea;Melanargia galathea;NA;Melanargia galathea;0.985355101480436;  
GQ200943;Lepidoptera;Melanargia galathea;Melanargia galathea;NA;Melanargia galathea;0.981855578470499;  
GQ200944;Lepidoptera;Melanargia galathea;Melanargia galathea;0.999;Melanargia galathea;0.991824592076933;  
GQ200945;Lepidoptera;Melanargia galathea;Melanargia galathea;0.002;Melanargia galathea;0.987025289954079;  
GQ885173;Lepidoptera;Polyommatus icarus;NA;NA;NA;0.999999777000389;  
GU244492;Lepidoptera;Polyommatus eros;NA;0.003;NA;0.999956428652965;  
GU559737;Lepidoptera;Polyommatus celina;NA;0.009;NA;0.763308217155514;  
GU559741;Lepidoptera;Polyommatus dolus;Polyommatus dolus;0.002;Polyommatus dolus;0.948273592698561;  
GU655002;Lepidoptera;Pyrgus malvae;Pyrgus malvae;NA;Pyrgus malvae;0.980121140374433;  
GU655003;Lepidoptera;Pyrgus malvae;Pyrgus malvae;NA;Pyrgus malvae;0.980121140374433;  
GU655004;Lepidoptera;Pyrgus alveus;NA;NA;Pyrgus alveus;0.827119616974978;  
GU655005;Lepidoptera;Polyommatus icarus;NA;0.002;Polyommatus icarus;0.997871588783533;  
GU655007;Lepidoptera;Plebejus argyrognomon;NA;0.001;NA;0.994620093546684;  
GU655008;Lepidoptera;Pararge aegeria;Pararge aegeria;1;Pararge aegeria;0.999999999963165;  
GU655009;Lepidoptera;Pararge aegeria;Pararge aegeria;1;Pararge aegeria;0.999999999963165;  
GU655010;Lepidoptera;Ochlodes sylvanus;NA;0.316;Ochlodes sylvanus;0.996318754838625;  
GU655011;Lepidoptera;Melitaea cinxia;Melitaea cinxia;1;Melitaea cinxia;0.99999999999403;  
GU655015;Lepidoptera;Lasiommata megera;Lasiommata megera;1;Lasiommata megera;0.99928528239676;  
GU655016;Lepidoptera;Gonepteryx rhamni;NA;0.474;Gonepteryx rhamni;0.982076396127858;  
GU655017;Lepidoptera;Glaucopsyche alexis;NA;NA;Glaucopsyche alexis;0.979004200903647;  
GU655018;Lepidoptera;Erebia medusa;NA;0.037;Erebia medusa;0.967935760207416;  
GU655019;Lepidoptera;Cupido minimus;NA;0.004;Cupido minimus;0.99987402211542;  
GU655020;Lepidoptera;Coenonympha pamphilus;Coenonympha pamphilus;1;Coenonympha pamphilus;0.99999999999744;  
GU655022;Lepidoptera;Carterocephalus palaemon;NA;0.052;Carterocephalus palaemon;0.728445051795325;  
GU655023;Lepidoptera;Carcharodus alceae;Carcharodus alceae;1;Carcharodus alceae;0.999999996515299;  
GU655025;Lepidoptera;Argynnis aglaja;NA;0.001;NA;0.99999999999586;  
GU655026;Lepidoptera;Araschnia levana;Araschnia levana;1;Araschnia levana;0.999999772187832;  
GU655027;Lepidoptera;Aphantopus hyperantus;Aphantopus hyperantus;0.006;Aphantopus hyperantus;0.999998615504572;  
GU668027;Lepidoptera;Cupido minimus;NA;0.001;Cupido minimus;0.99992423685743;  
GU668028;Lepidoptera;Cupido minimus;NA;0.009;Cupido minimus;0.999791453712643;  
GU668029;Lepidoptera;Cupido osiris;Cupido osiris;1;Cupido osiris;0.999999944757265;  
GU668031;Lepidoptera;Colias crocea;NA;0.059;NA;0.99999999999738;  
GU668032;Lepidoptera;Colias crocea;NA;0.059;NA;0.99999999999738;  
GU668033;Lepidoptera;Cupido minimus;NA;0.006;Cupido minimus;0.999768371759258;  
GU668034;Lepidoptera;Colias alfacariensis;Colias alfacariensis;1;Colias alfacariensis;0.999857768905063;  
GU668035;Lepidoptera;Colias alfacariensis;Colias alfacariensis;0.001;Colias alfacariensis;0.999857790810452;  
GU668036;Lepidoptera;Colias alfacariensis;Colias alfacariensis;0.001;Colias alfacariensis;0.999857790810452;  
GU668037;Lepidoptera;Colias alfacariensis;Colias alfacariensis;0.001;Colias alfacariensis;0.999857790810452;  
GU668038;Lepidoptera;Coenonympha pamphilus;Coenonympha pamphilus;1;Coenonympha pamphilus;0.99999999999744;  
GU668039;Lepidoptera;Coenonympha pamphilus;Coenonympha pamphilus;1;Coenonympha pamphilus;0.99999999999744;  
GU668040;Lepidoptera;Coenonympha pamphilus;Coenonympha pamphilus;1;Coenonympha pamphilus;0.99999999999744;  
GU668041;Lepidoptera;Coenonympha pamphilus;Coenonympha pamphilus;1;Coenonympha pamphilus;0.99999999999744;  
GU668042;Lepidoptera;Coenonympha glycerion;NA;0.28;Coenonympha glycerion;0.999998036263913;  
GU668043;Lepidoptera;Coenonympha glycerion;NA;0.28;Coenonympha glycerion;0.999998036263913;  
GU669369;Lepidoptera;Lycaena phlaeas;Archiearis parthenias;1;Archiearis parthenias;0.999998637442094;  
GU669600;Lepidoptera;Plebejus idas;NA;0.007;NA;0.999546324331549;  
GU669601;Lepidoptera;Plebejus idas;NA;0.007;NA;0.999546324331549;  
GU669602;Lepidoptera;Plebejus idas;NA;0.007;NA;0.999546324331549;  
GU669603;Lepidoptera;Plebejus idas;NA;0.007;NA;0.999546324331549;  
GU669604;Lepidoptera;Brintesia circe;Brintesia circe;1;Brintesia circe;0.99999972858607;  
GU669605;Lepidoptera;Polyommatus dorylas;Polyommatus dorylas;0.007;Polyommatus dorylas;0.987428194236461;  
GU669606;Lepidoptera;Polyommatus dorylas;Polyommatus dorylas;0.007;Polyommatus dorylas;0.987428194236461;  
GU669609;Lepidoptera;Nymphalis c-album;NA;0.215;NA;0.999999192918557;  
GU669610;Lepidoptera;Nymphalis c-album;NA;0.215;NA;0.999999192918557;  
GU669611;Lepidoptera;Plebejus argus;Plebejus argus;0.003;Plebejus argus;0.990564896508373;  
GU669614;Lepidoptera;Pyrgus carthami;Pyrgus carthami;1;Pyrgus carthami;0.999993533091689;

GU669616;Lepidoptera;Nymphalis c-album;NA;0.215;NA;0.999999192918557;  
GU669617;Lepidoptera;Polyommatus icarus;Polyommatus icarus;0.001;Polyommatus  
icarus;0.999851522482238;  
GU669618;Lepidoptera;Plebejus argus;Plebejus argus;0.013;Plebejus argus;0.99029909759821;  
GU669621;Lepidoptera;Plebejus argus;NA;NA;Plebejus argus;0.969283117748927;  
GU669622;Lepidoptera;Polyommatus icarus;NA;0.004;Polyommatus icarus;0.999481683747521;  
GU669623;Lepidoptera;Polyommatus dorylas;Polyommatus dorylas;0.007;Polyommatus  
dorylas;0.987428194236461;  
GU669624;Lepidoptera;Nymphalis c-album;NA;0.215;NA;0.999999192918557;  
GU669625;Lepidoptera;Polyommatus icarus;Polyommatus icarus;0.001;Polyommatus  
icarus;0.999851522482238;  
GU669627;Lepidoptera;Euphydryas aurinia;NA;0.216;Euphydryas aurinia;0.994446100640531;  
GU669628;Lepidoptera;Brintesia circe;Brintesia circe;1;Brintesia circe;0.999999209802354;  
GU669629;Lepidoptera;Plebejus argus;NA;0.036;Plebejus argus;0.988160277018267;  
GU669630;Lepidoptera;Boloria euphrosyne;Boloria euphrosyne;1;Boloria  
euphrosyne;0.999998093616766;  
GU669631;Lepidoptera;Cyaniris semiargus;NA;NA;Cyaniris semiargus;0.999097907036339;  
GU669633;Lepidoptera;Parnassius mnemosyne;Parnassius mnemosyne;1;Parnassius  
mnemosyne;0.999999336880698;  
GU669634;Lepidoptera;Boloria euphrosyne;Boloria euphrosyne;0.002;Boloria  
euphrosyne;0.999959672696798;  
GU669635;Lepidoptera;Boloria euphrosyne;Boloria euphrosyne;0.003;Boloria  
euphrosyne;0.999970094877776;  
GU669637;Lepidoptera;Apatura ilia;NA;0.165;Apatura ilia;0.956796812031481;  
GU669638;Lepidoptera;Pyrgus carthami;Pyrgus carthami;1;Pyrgus carthami;0.999981615717954;  
GU669642;Lepidoptera;Satyrium w-album;NA;0.056;Satyrium w-album;0.989378230996316;  
GU669643;Lepidoptera;Polyommatus daphnis;Polyommatus daphnis;0.001;Polyommatus  
daphnis;0.989092184788836;  
GU669646;Lepidoptera;Cupido alcetas;Cupido alcetas;0.999;Cupido alcetas;0.995696397591104;  
GU669647;Lepidoptera;Hipparchia semele;NA;0.001;Hipparchia semele;0.802446092830354;  
GU669649;Lepidoptera;Erebia manto;NA;0.063;Erebia manto;0.998375472639544;  
GU669650;Lepidoptera;Erebia manto;Erebia manto;NA;Erebia manto;0.999129075172383;  
GU669651;Lepidoptera;Erebia euryale;NA;NA;Erebia euryale;0.919518760623792;  
GU669652;Lepidoptera;Lasiommata maera;Lasiommata maera;1;Lasiommata maera;0.999999229574554;  
GU669655;Lepidoptera;Lasiommata maera;Lasiommata maera;1;Lasiommata maera;0.999999181072746;  
GU669656;Lepidoptera;Erebia euryale;NA;NA;Erebia euryale;0.919518760623792;  
GU669659;Lepidoptera;Lasiommata maera;Lasiommata maera;1;Lasiommata maera;0.999999181072746;  
GU669660;Lepidoptera;Callophrys rubi;NA;0.003;Callophrys rubi;0.997328639918919;  
GU669662;Lepidoptera;Lasiommata maera;Lasiommata maera;1;Lasiommata maera;0.999999483871809;  
GU669664;Lepidoptera;Erebia euryale;NA;NA;Erebia euryale;0.919518760623792;  
GU669665;Lepidoptera;Pieris napi;NA;0.084;Pieris napi;0.885343420349066;  
GU669667;Lepidoptera;Erebia epiphron;Erebia epiphron;NA;Erebia epiphron;0.998021437243156;  
GU669668;Lepidoptera;Pieris napi;NA;0.028;Pieris napi;0.888205720664699;  
GU669671;Lepidoptera;Pieris napi;NA;0.011;Pieris napi;0.801985394724814;  
GU669672;Lepidoptera;Pieris napi;NA;0.011;Pieris napi;0.801985394724814;  
GU669673;Lepidoptera;Pieris napi;NA;0.011;Pieris napi;0.801985394724814;  
GU669679;Lepidoptera;Parnassius mnemosyne;Parnassius mnemosyne;1;Parnassius  
mnemosyne;0.999999269897625;  
GU669680;Lepidoptera;Pararge aegeria;Pararge aegeria;1;Pararge aegeria;0.999999999963165;  
GU669681;Lepidoptera;Pararge aegeria;Pararge aegeria;1;Pararge aegeria;0.999999999963165;  
GU669683;Lepidoptera;Papilio machaon;Papilio machaon;NA;Papilio machaon;0.998259418780604;  
GU669684;Lepidoptera;Pararge aegeria;Pararge aegeria;1;Pararge aegeria;0.999999999963165;  
GU669685;Lepidoptera;Pararge aegeria;Pararge aegeria;1;Pararge aegeria;0.999999999963165;  
GU669686;Lepidoptera;Ochlodes sylvanus;NA;0.316;Ochlodes sylvanus;0.996318754838625;  
GU669687;Lepidoptera;Ochlodes sylvanus;NA;0.316;Ochlodes sylvanus;0.996318754838625;  
GU669689;Lepidoptera;Papilio machaon;Papilio machaon;0.001;Papilio machaon;0.999463129150422;  
GU669691;Lepidoptera;Ochlodes sylvanus;NA;0.316;Ochlodes sylvanus;0.996318754838625;  
GU669692;Lepidoptera;Ochlodes sylvanus;NA;0.316;Ochlodes sylvanus;0.996318754838625;  
GU669693;Lepidoptera;Ochlodes sylvanus;NA;0.316;Ochlodes sylvanus;0.996318754838625;  
GU669698;Lepidoptera;Favonius quercus;NA;NA;Favonius quercus;0.73046069582187;  
GU669699;Lepidoptera;Favonius quercus;NA;NA;Favonius quercus;0.73046069582187;  
GU669702;Lepidoptera;Favonius quercus;NA;NA;Favonius quercus;0.73046069582187;  
GU669703;Lepidoptera;Favonius quercus;NA;NA;Favonius quercus;0.73046069582187;  
GU669704;Lepidoptera;Melitaea trivia;Melitaea trivia;1;Melitaea trivia;0.999999999977604;  
GU669705;Lepidoptera;Melitaea trivia;Melitaea trivia;1;Melitaea trivia;0.999999999977604;  
GU669706;Lepidoptera;Melitaea trivia;Melitaea trivia;1;Melitaea trivia;0.999999999977604;  
GU669707;Lepidoptera;Melitaea nevadensis;Melitaea celadussa;1;Melitaea  
celadussa;0.999267524572691;  
GU669712;Lepidoptera;Melitaea didyma;Melitaea didyma;1;Melitaea didyma;0.978209045677336;  
GU669713;Lepidoptera;Melitaea didyma;Melitaea didyma;1;Melitaea didyma;0.978209045677336;  
GU669714;Lepidoptera;Melitaea didyma;Melitaea didyma;NA;Melitaea didyma;0.980272836986251;  
GU669715;Lepidoptera;Melitaea didyma;Melitaea didyma;1;Melitaea didyma;0.979092139543137;  
GU669716;Lepidoptera;Melitaea diamina;NA;0.149;Melitaea diamina;0.999999996592464;  
GU669717;Lepidoptera;Melitaea diamina;NA;0.066;Melitaea diamina;0.999999985294579;  
GU669718;Lepidoptera;Melitaea diamina;NA;0.149;Melitaea diamina;0.999999996592464;  
GU669719;Lepidoptera;Melitaea diamina;NA;0.149;Melitaea diamina;0.999999996592464;  
GU669720;Lepidoptera;Melitaea cinxia;Melitaea cinxia;1;Melitaea cinxia;0.999999999999318;  
GU669721;Lepidoptera;Melitaea cinxia;Melitaea cinxia;1;Melitaea cinxia;0.999999999999545;



GU669722;Lepidoptera;Melitaea cinxia;Melitaea cinxia;1;Melitaea cinxia;0.999999999999773;  
GU669723;Lepidoptera;Melitaea cinxia;Melitaea cinxia;1;Melitaea cinxia;0.999999999999659;  
GU669724;Lepidoptera;Polyommatus daphnis;Polyommatus daphnis;0.003;Polyommatus  
daphnis;0.99269461877028;  
GU669725;Lepidoptera;Polyommatus daphnis;Polyommatus daphnis;0.001;Polyommatus  
daphnis;0.98724811249498;  
GU669726;Lepidoptera;Melitaea nevadensis;Melitaea celadussa;1;Melitaea  
celadussa;0.999267524572691;  
GU669727;Lepidoptera;Melitaea nevadensis;Melitaea celadussa;0.999;Melitaea  
celadussa;0.991309474236601;  
GU669729;Lepidoptera;Polyommatus daphnis;Polyommatus daphnis;0.004;Polyommatus  
daphnis;0.98580375378789;  
GU669730;Lepidoptera;Polyommatus daphnis;Polyommatus daphnis;0.001;Polyommatus  
daphnis;0.985613807163386;  
GU669731;Lepidoptera;Maniola jurtina;NA;0.001;Maniola jurtina;0.939220105860875;  
GU669732;Lepidoptera;Maniola jurtina;NA;NA;Maniola jurtina;0.953827931447544;  
GU669733;Lepidoptera;Maniola jurtina;NA;NA;Maniola jurtina;0.953827931447544;  
GU669734;Lepidoptera;Maniola jurtina;NA;NA;Maniola jurtina;0.953827931447544;  
GU669739;Lepidoptera;Lysandra coridon;NA;NA;NA;0.999824213859773;  
GU669740;Lepidoptera;Lysandra coridon;NA;NA;NA;0.999974416879064;  
GU669741;Lepidoptera;Lysandra coridon;NA;NA;NA;0.99980755553816;  
GU669742;Lepidoptera;Lysandra coridon;NA;NA;Lysandra coridon;0.719434738962092;  
GU669746;Lepidoptera;Lysandra coridon;NA;NA;Lysandra coridon;0.719434738962092;  
GU669748;Lepidoptera;Lycaena virgaureae;NA;0.077;Lycaena virgaureae;0.999717833371003;  
GU669749;Lepidoptera;Lycaena virgaureae;NA;0.077;Lycaena virgaureae;0.999717833371003;  
GU669751;Lepidoptera;Lycaena tityrus;Lycaena tityrus;1;Lycaena tityrus;0.999998453088497;  
GU669752;Lepidoptera;Lycaena tityrus;Lycaena tityrus;1;Lycaena tityrus;0.99999121938815;  
GU669753;Lepidoptera;Lycaena virgaureae;NA;0.063;Lycaena virgaureae;0.999609671520472;  
GU669754;Lepidoptera;Lycaena virgaureae;NA;0.077;Lycaena virgaureae;0.999717833371003;  
GU669755;Lepidoptera;Lycaena phlaeas;Lycaena phlaeas;1;Lycaena phlaeas;0.999999996363186;  
GU669756;Lepidoptera;Lycaena tityrus;Lycaena tityrus;1;Lycaena tityrus;0.999998928238034;  
GU669757;Lepidoptera;Lycaena tityrus;Lycaena tityrus;1;Lycaena tityrus;0.999998928238034;  
GU669758;Lepidoptera;Lycaena tityrus;Lycaena tityrus;1;Lycaena tityrus;0.999998928238034;  
GU669759;Lepidoptera;Lycaena phlaeas;Lycaena phlaeas;1;Lycaena phlaeas;0.99999995026627;  
GU669760;Lepidoptera;Lycaena phlaeas;Lycaena phlaeas;1;Lycaena phlaeas;0.99999989808146;  
GU669761;Lepidoptera;Lycaena phlaeas;Lycaena phlaeas;1;Lycaena phlaeas;0.999999996363186;  
GU669762;Lepidoptera;Lycaena alciphron;Lycaena alciphron;1;Lycaena alciphron;0.99999978186528;  
GU669763;Lepidoptera;Lycaena alciphron;Lycaena alciphron;1;Lycaena alciphron;0.999999794606957;  
GU669766;Lepidoptera;Lycaena alciphron;Lycaena alciphron;1;Lycaena alciphron;0.99999852025592;  
GU669767;Lepidoptera;Lycaena alciphron;Lycaena alciphron;1;Lycaena alciphron;0.999999716612377;  
GU669768;Lepidoptera;Limenitis camilla;Limenitis camilla;0.009;Limenitis  
camilla;0.9999828626808;  
GU669776;Lepidoptera;Lasiommata megera;Lasiommata megera;1;Lasiommata megera;0.999928528239676;  
GU669777;Lepidoptera;Erebia pandrose;NA;0.002;Leptidea sinapis;0.938927273709494;  
GU669778;Lepidoptera;Lasiommata maera;Lasiommata maera;1;Lasiommata maera;0.999997945450226;  
GU669779;Lepidoptera;Lasiommata megera;Lasiommata megera;1;Lasiommata megera;0.999928528239676;  
GU669780;Lepidoptera;Lasiommata megera;Lasiommata megera;1;Lasiommata megera;0.999944542420381;  
GU669781;Lepidoptera;Lasiommata megera;Lasiommata megera;1;Lasiommata megera;0.999928528239676;  
GU669782;Lepidoptera;Lampides boeticus;Lampides boeticus;1;Lampides boeticus;0.99999999545906;  
GU669783;Lepidoptera;Lampides boeticus;Lampides boeticus;1;Lampides boeticus;0.99999999545906;  
GU669784;Lepidoptera;Lasiommata maera;Lasiommata maera;1;Lasiommata maera;0.999997945450226;  
GU669785;Lepidoptera;Lasiommata maera;Lasiommata maera;1;Lasiommata maera;0.999998751575999;  
GU669788;Lepidoptera;Lampides boeticus;Lampides boeticus;1;Lampides boeticus;0.99999999293607;  
GU669789;Lepidoptera;Lampides boeticus;Lampides boeticus;1;Lampides boeticus;0.99999999616279;  
GU669792;Lepidoptera;Issoria lathonia;Issoria lathonia;1;Issoria lathonia;0.99999999989257;  
GU669802;Lepidoptera;Hipparchia semele;NA;0.001;Hipparchia semele;0.859606265929303;  
GU669803;Lepidoptera;Hipparchia semele;NA;0.002;Hipparchia semele;0.767063813608107;  
GU669804;Lepidoptera;Hipparchia semele;NA;0.002;Hipparchia semele;0.767063813608107;  
GU669805;Lepidoptera;Hipparchia semele;NA;0.002;Hipparchia semele;0.784603069619426;  
GU669806;Lepidoptera;Hipparchia fagi;Hipparchia fagi;NA;Hipparchia fagi;0.986566456150817;  
GU669807;Lepidoptera;Hipparchia fagi;Hipparchia fagi;NA;Hipparchia fagi;0.986566456150817;  
GU669808;Lepidoptera;Hipparchia fagi;Hipparchia fagi;NA;Hipparchia fagi;0.986566456150817;  
GU669809;Lepidoptera;Hipparchia fagi;Hipparchia fagi;NA;Hipparchia fagi;0.986566456150817;  
GU669810;Lepidoptera;Gonepteryx rhamni;Gonepteryx rhamni;1;Gonepteryx rhamni;0.99964616790002;  
GU669811;Lepidoptera;Gonepteryx rhamni;Gonepteryx rhamni;1;Gonepteryx rhamni;0.99964616790002;  
GU669812;Lepidoptera;Hamearis lucina;NA;NA;Hamearis lucina;0.99999999984141;  
GU669813;Lepidoptera;Hamearis lucina;NA;NA;Hamearis lucina;0.99999999984141;  
GU669814;Lepidoptera;Glaucopsyche alexis;Glaucopsyche alexis;0.001;Glaucopsyche  
alexis;0.994667256195263;  
GU669815;Lepidoptera;Glaucopsyche alexis;Glaucopsyche alexis;0.001;Glaucopsyche  
alexis;0.994667256195263;  
GU669816;Lepidoptera;Gonepteryx rhamni;NA;0.474;Gonepteryx rhamni;0.982076396127858;  
GU669817;Lepidoptera;Gonepteryx rhamni;NA;0.474;Gonepteryx rhamni;0.982076396127858;  
GU669818;Lepidoptera;Cupido argiades;NA;0.471;NA;0.999999999949778;  
GU669819;Lepidoptera;Cupido argiades;NA;0.499;NA;0.99999999984682;  
GU669820;Lepidoptera;Glaucopsyche alexis;Glaucopsyche alexis;0.001;Glaucopsyche  
alexis;0.994667256195263;

GU669821;Lepidoptera;Glaucopsyche alexis;Glaucopsyche alexis;0.001;Glaucopsyche alexis;0.992129691008676;  
GU669822;Lepidoptera;Cupido alcetas;NA;0.068;Cupido alcetas;0.88988907876118;  
GU669823;Lepidoptera;Cupido argiades;NA;0.499;NA;0.99999999984682;  
GU669824;Lepidoptera;Cupido argiades;NA;0.499;NA;0.99999999984682;  
GU669825;Lepidoptera;Cupido argiades;NA;0.499;NA;0.99999999984682;  
GU669826;Lepidoptera;Cupido alcetas;NA;0.068;Cupido alcetas;0.88988907876118;  
GU669827;Lepidoptera;Cupido alcetas;NA;0.068;Cupido alcetas;0.88988907876118;  
GU669828;Lepidoptera;Cupido alcetas;NA;0.068;Cupido alcetas;0.88988907876118;  
GU669829;Lepidoptera;Cupido alcetas;NA;0.068;Cupido alcetas;0.88988907876118;  
GU669830;Lepidoptera;Euphydryas aurinia;Euphydryas aurinia;0.001;Euphydryas aurinia;0.998892818330584;  
GU669831;Lepidoptera;Euphydryas aurinia;Euphydryas aurinia;0.02;Euphydryas aurinia;0.99668249939786;  
GU669832;Lepidoptera;Euphydryas aurinia;Euphydryas aurinia;0.02;Euphydryas aurinia;0.99668249939786;  
GU669833;Lepidoptera;Euphydryas aurinia;Euphydryas aurinia;0.02;Euphydryas aurinia;0.99668249939786;  
GU669834;Lepidoptera;Erynnis tages;Erynnis tages;0.999;Erynnis tages;0.999956830266092;  
GU669835;Lepidoptera;Erynnis tages;Erynnis tages;1;Erynnis tages;0.999999160434197;  
GU669837;Lepidoptera;Plebejus idas;NA;0.007;NA;0.999546324331549;  
GU669838;Lepidoptera;Erebia manto;Erebia manto;0.009;Erebia manto;0.999861807193394;  
GU669840;Lepidoptera;Erebia manto;Erebia manto;0.009;Erebia manto;0.999861807193394;  
GU669841;Lepidoptera;Erebia manto;Erebia manto;0.009;Erebia manto;0.999861807193394;  
GU669842;Lepidoptera;Erebia manto;Erebia manto;NA;Erebia manto;0.999930125474235;  
GU669843;Lepidoptera;Erebia manto;Erebia manto;NA;Erebia manto;0.999926924199631;  
GU669844;Lepidoptera;Erebia euryale;NA;NA;Erebia euryale;0.93493911427573;  
GU669845;Lepidoptera;Erebia euryale;NA;NA;Erebia euryale;0.93493911427573;  
GU669846;Lepidoptera;Erebia euryale;NA;NA;Erebia euryale;0.965689685361429;  
GU669848;Lepidoptera;Erebia epiphron;NA;NA;Erebia epiphron;0.950006471153786;  
GU669849;Lepidoptera;Erebia epiphron;NA;NA;Erebia epiphron;0.950006471153786;  
GU669850;Lepidoptera;Erebia euryale;NA;NA;Erebia euryale;0.93493911427573;  
GU669851;Lepidoptera;Erebia euryale;NA;NA;Erebia euryale;0.93493911427573;  
GU669852;Lepidoptera;Vanessa cardui;Vanessa cardui;1;Vanessa cardui;0.999999459983318;  
GU669853;Lepidoptera;Erebia epiphron;NA;NA;Erebia epiphron;0.950006471153786;  
GU669854;Lepidoptera;Erebia epiphron;NA;NA;Erebia epiphron;0.930026054867432;  
GU669855;Lepidoptera;Erebia epiphron;NA;NA;Erebia epiphron;0.950006471153786;  
GU669856;Lepidoptera;Cyaniris semiargus;NA;NA;Cyaniris semiargus;0.999097907036339;  
GU669857;Lepidoptera;Vanessa cardui;Vanessa cardui;1;Vanessa cardui;0.99999803450484;  
GU669858;Lepidoptera;Vanessa cardui;Vanessa cardui;1;Vanessa cardui;0.999999459983318;  
GU669859;Lepidoptera;Vanessa cardui;Vanessa cardui;1;Vanessa cardui;0.999999459983318;  
GU669860;Lepidoptera;Cupido osiris;Cupido osiris;1;Cupido osiris;0.99999944757265;  
GU669861;Lepidoptera;Cyaniris semiargus;NA;NA;Cyaniris semiargus;0.999051841766953;  
GU669862;Lepidoptera;Cyaniris semiargus;NA;NA;Cyaniris semiargus;0.999097907036339;  
GU669863;Lepidoptera;Cyaniris semiargus;NA;NA;Cyaniris semiargus;0.999097907036339;  
GU669864;Lepidoptera;Cupido minimus;NA;0.001;Cupido minimus;0.99992423685743;  
GU675630;Lepidoptera;Thecla betulae;Thecla betulae;1;Thecla betulae;0.99999999972886;  
GU675633;Lepidoptera;Plebejus argyrognomon;NA;0.001;NA;0.994620093546684;  
GU675636;Lepidoptera;Polyommatus amandus;Polyommatus amandus;0.003;Polyommatus amandus;0.999983287111715;  
GU675637;Lepidoptera;Polyommatus amandus;Polyommatus amandus;0.003;Polyommatus amandus;0.999980071833264;  
GU675638;Lepidoptera;Polyommatus amandus;Polyommatus amandus;0.003;Polyommatus amandus;0.999980071833264;  
GU675641;Lepidoptera;Pyrgus sidae;Pyrgus sidae;1;Pyrgus sidae;0.99996750457282;  
GU675642;Lepidoptera;Pyrgus sidae;Pyrgus sidae;1;Pyrgus sidae;0.99999311394709;  
GU675648;Lepidoptera;Pyrgus sidae;Pyrgus sidae;1;Pyrgus sidae;0.999981962201329;  
GU675661;Lepidoptera;Erebia pandrose;Erebia pandrose;0.998;Erebia pandrose;0.99797994145198;  
GU675662;Lepidoptera;Erebia pandrose;Erebia pandrose;0.998;Erebia pandrose;0.998086832694793;  
GU675664;Lepidoptera;Aglais urticae;NA;0.001;Aglais urticae;0.990689645759264;  
GU675665;Lepidoptera;Aporia crataegi;NA;NA;Aporia crataegi;0.999996781126733;  
GU675670;Lepidoptera;Pyrgus foulquieri;Pyrgus foulquieri;0.005;Pyrgus foulquieri;0.741885925757585;  
GU675674;Lepidoptera;Pyrgus armoricanus;Pyrgus armoricanus;1;Pyrgus armoricanus;0.999997353848817;  
GU675675;Lepidoptera;Pyrgus armoricanus;Pyrgus armoricanus;1;Pyrgus armoricanus;0.999997353848817;  
GU675677;Lepidoptera;Colias crocea;NA;0.059;NA;0.99999999999738;  
GU675678;Lepidoptera;Polyommatus dorylas;Polyommatus dorylas;0.007;Polyommatus dorylas;0.987428194236461;  
GU675682;Lepidoptera;Satyrium spini;Satyrium spini;1;Satyrium spini;0.99998222517791;  
GU675683;Lepidoptera;Polyommatus eros;Polyommatus eros;0.001;Polyommatus eros;0.990287248915798;  
GU675684;Lepidoptera;Colias alfacariensis;Colias alfacariensis;1;Colias alfacariensis;0.999620674460243;  
GU675685;Lepidoptera;Argynnis paphia;Argynnis paphia;1;Argynnis paphia;0.999999992970402;  
GU675687;Lepidoptera;Satyrium spini;Satyrium spini;1;Satyrium spini;0.999996354401924;  
GU675689;Lepidoptera;Lycaena tityrus;Lycaena tityrus;1;Lycaena tityrus;0.999997855580031;  
GU675690;Lepidoptera;Lycaena tityrus;Lycaena tityrus;1;Lycaena tityrus;0.999995271914181;

GU675691;Lepidoptera;Vanessa atalanta;Vanessa atalanta;1;Vanessa atalanta;0.999999999757762;  
GU675694;Lepidoptera;Melitaea trivia;Melitaea trivia;1;Melitaea trivia;0.9999999997172;  
GU675695;Lepidoptera;Maniola jurtina;NA;0.012;Maniola jurtina;0.91755716175482;  
GU675696;Lepidoptera;Nymphalis c-album;NA;0.215;NA;0.999999192918557;  
GU675699;Lepidoptera;Pieris napi;NA;0.012;Pieris napi;0.918936415764965;  
GU675700;Lepidoptera;Plebejus idas;NA;0.007;NA;0.999546324331549;  
GU675701;Lepidoptera;Pieris napi;NA;0.011;Pieris napi;0.801985394724814;  
GU675702;Lepidoptera;Lasiommata maera;Lasiommata maera;1;Lasiommata maera;0.999997945450226;  
GU675703;Lepidoptera;Pieris napi;NA;0.028;Pieris napi;0.888205720664699;  
GU675704;Lepidoptera;Melitaea deione;Melitaea deione;1;Melitaea deione;0.99999999676987;  
GU675705;Lepidoptera;Fabriciana adippe;Fabriciana adippe;0.001;Fabriciana  
adippe;0.999538788643547;  
GU675706;Lepidoptera;Melitaea parthenoides;Melitaea parthenoides;1;Melitaea  
parthenoides;0.99999980399821;  
GU675707;Lepidoptera;Coenonympha arcania;Coenonympha arcania;0.019;Coenonympha  
arcania;0.986942135735679;  
GU675709;Lepidoptera;Coenonympha pamphilus;Coenonympha pamphilus;1;Coenonympha  
pamphilus;0.99999999999289;  
GU675710;Lepidoptera;Aglaia urticae;NA;0.002;Aglaia urticae;0.987497593219019;  
GU675711;Lepidoptera;Erebia meolans;Erebia meolans;NA;Erebia meolans;0.999835953426128;  
GU675713;Lepidoptera;Erebia meolans;Erebia meolans;NA;Erebia meolans;0.999835953426128;  
GU675714;Lepidoptera;Erebia meolans;Erebia meolans;NA;Erebia meolans;0.999835953426128;  
GU675715;Lepidoptera;Erebia euryale;NA;NA;Erebia euryale;0.926347729741663;  
GU675721;Lepidoptera;Satyrus actaea;NA;0.9;Satyrus actaea;0.998537709015806;  
GU675722;Lepidoptera;Chazara briseis;Chazara briseis;1;Chazara briseis;0.999980393060755;  
GU675723;Lepidoptera;Hipparchia semele;NA;0.001;Hipparchia semele;0.852517984111014;  
GU675724;Lepidoptera;Satyrus ferula;Satyrus ferula;0.001;Satyrus ferula;0.994329228962786;  
GU675725;Lepidoptera;Hipparchia fidia;Hipparchia fidia;1;Hipparchia fidia;1;  
GU675726;Lepidoptera;Hipparchia hermione;Hipparchia hermione;1;Hipparchia  
hermione;0.99958099561668;  
GU675727;Lepidoptera;Hipparchia fidia;Hipparchia fidia;1;Hipparchia fidia;1;  
GU675728;Lepidoptera;Arethusana arethusa;Arethusana arethusa;0.003;Arethusana  
arethusa;0.999976174545094;  
GU675729;Lepidoptera;Hipparchia statilinus;Hipparchia statilinus;1;Hipparchia  
statilinus;0.99999999999801;  
GU675735;Lepidoptera;Arethusana arethusa;NA;0.062;Arethusana arethusa;0.999962489703143;  
GU675737;Lepidoptera;Pyrgus serratulae;Pyrgus serratulae;1;Pyrgus serratulae;0.99999877361184;  
GU675738;Lepidoptera;Pyrgus carthami;Pyrgus carthami;1;Pyrgus carthami;0.999997085657879;  
GU675740;Lepidoptera;Pyrgus alveus;NA;NA;Pyrgus alveus;0.931326683565012;  
GU675742;Lepidoptera;Cupido argiades;NA;0.499;NA;0.99999999984682;  
GU675743;Lepidoptera;Cupido argiades;NA;0.499;NA;0.99999999984682;  
GU675744;Lepidoptera;Cupido argiades;NA;0.499;NA;0.99999999984682;  
GU675745;Lepidoptera;Celastrina argiolus;Celastrina argiolus;1;Celastrina  
argiolus;0.999527385150531;  
GU675747;Lepidoptera;Celastrina argiolus;Celastrina argiolus;1;Celastrina  
argiolus;0.999527385150531;  
GU675748;Lepidoptera;Lampides boeticus;Lampides boeticus;1;Lampides boeticus;0.999999999411585;  
GU675755;Lepidoptera;Polyommatus icarus;NA;0.004;Polyommatus icarus;0.999481683747521;  
GU675755;Lepidoptera;Polyommatus icarus;NA;0.004;Polyommatus icarus;0.999481683747521;  
GU675758;Lepidoptera;Lysandra coridon;NA;NA;NA;0.999976559473762;  
GU675759;Lepidoptera;Lysandra coridon;NA;NA;NA;0.999969135579956;  
GU675761;Lepidoptera;Polyommatus daphnis;NA;0.031;Polyommatus daphnis;0.989661132749926;  
GU675762;Lepidoptera;Polyommatus dorylas;Polyommatus dorylas;0.025;Polyommatus  
dorylas;0.973229109265438;  
GU675763;Lepidoptera;Polyommatus dorylas;Polyommatus dorylas;0.025;Polyommatus  
dorylas;0.973229109265438;  
GU675764;Lepidoptera;Argynnis aglaja;NA;NA;NA;0.99999999998776;  
GU675769;Lepidoptera;Euphydryas aurinia;Euphydryas aurinia;0.005;Euphydryas  
aurinia;0.998570950148478;  
GU675770;Lepidoptera;Melitaea deione;Melitaea deione;1;Melitaea deione;0.999999998710706;  
GU675771;Lepidoptera;Vanessa atalanta;Vanessa atalanta;1;Vanessa atalanta;0.99999999297358;  
GU675774;Lepidoptera;Nymphalis c-album;NA;0.215;NA;0.999999192918557;  
GU675775;Lepidoptera;Charaxes jasius;Charaxes jasius;NA;Charaxes jasius;0.988941612024336;  
GU675776;Lepidoptera;Aglaia urticae;NA;0.145;Aglaia urticae;0.986365595304464;  
GU675777;Lepidoptera;Charaxes jasius;Charaxes jasius;NA;Charaxes jasius;0.988941612024336;  
GU675778;Lepidoptera;Charaxes jasius;Charaxes jasius;NA;Charaxes jasius;0.988941612024336;  
GU675779;Lepidoptera;Satyrium esculi;Satyrium esculi;1;Satyrium esculi;0.999999957367948;  
GU675780;Lepidoptera;Satyrium ilicis;Satyrium ilicis;1;Satyrium ilicis;0.999999987901305;  
GU675781;Lepidoptera;Callophrys rubi;NA;0.003;Callophrys rubi;0.996429498210922;  
GU675782;Lepidoptera;Callophrys rubi;NA;0.001;Callophrys rubi;0.99870518510598;  
GU675783;Lepidoptera;Glaucopsyche alexis;NA;NA;Glaucopsyche alexis;0.980579683000946;  
GU675784;Lepidoptera;Glaucopsyche alexis;NA;NA;Glaucopsyche alexis;0.97933749849394;  
GU675785;Lepidoptera;Glaucopsyche melanops;Glaucopsyche melanops;1;Glaucopsyche  
melanops;0.999952924254607;  
GU675786;Lepidoptera;Glaucopsyche melanops;Glaucopsyche melanops;1;Glaucopsyche  
melanops;0.999952924254607;  
GU675789;Lepidoptera;Celastrina argiolus;Celastrina argiolus;1;Celastrina  
argiolus;0.999527385150531;

GU675790;Lepidoptera;Celastrina argiolus;Celastrina argiolus;1;Celastrina argiolus;0.999527385150531;  
 GU675792;Lepidoptera;Polyommatus icarus;Polyommatus icarus;0.001;Polyommatus icarus;0.999503294805987;  
 GU675792;Lepidoptera;Polyommatus icarus;Polyommatus icarus;0.001;Polyommatus icarus;0.999503294805987;  
 GU675793;Lepidoptera;Polyommatus eros;NA;0.003;Polyommatus eros;0.985402505884526;  
 GU675794;Lepidoptera;Polyommatus eros;NA;0.003;Polyommatus eros;0.985402505884526;  
 GU675795;Lepidoptera;Polyommatus damon;Polyommatus damon;1;Polyommatus damon;0.999999961804208;  
 GU675796;Lepidoptera;Polyommatus dorylas;Polyommatus dorylas;0.007;Polyommatus dorylas;0.975640696264455;  
 GU675797;Lepidoptera;Cupido minimus;NA;0.009;Cupido minimus;0.999791453712643;  
 GU675800;Lepidoptera;Cupido argiades;NA;0.499;NA;0.99999999984682;  
 GU675801;Lepidoptera;Gonepteryx rhamni;Gonepteryx rhamni;1;Gonepteryx rhamni;0.999850170258883;  
 GU675802;Lepidoptera;Lycaena tityrus;Lycaena tityrus;1;Lycaena tityrus;0.999997855580031;  
 GU675807;Lepidoptera;Limenitis camilla;Limenitis camilla;0.009;Limenitis camilla;0.9999828626808;  
 GU675809;Lepidoptera;Lasiommata megera;Lasiommata megera;1;Lasiommata megera;0.999943327299082;  
 GU675810;Lepidoptera;Lasiommata megera;Lasiommata megera;1;Lasiommata megera;0.999928528239676;  
 GU675811;Lepidoptera;Pararge aegeria;Pararge aegeria;1;Pararge aegeria;0.999999999963165;  
 GU675812;Lepidoptera;Lasiommata maera;Lasiommata maera;1;Lasiommata maera;0.999997945450226;  
 GU675814;Lepidoptera;Pararge aegeria;Pararge aegeria;1;Pararge aegeria;0.999999999963165;  
 GU675815;Lepidoptera;Erebia epiphron;NA;NA;Erebia epiphron;0.950006471153786;  
 GU675818;Lepidoptera;Erebia epiphron;NA;NA;Erebia epiphron;0.950006471153786;  
 GU675822;Lepidoptera;Erebia euryale;NA;NA;Erebia euryale;0.93493911427573;  
 GU675835;Lepidoptera;Anthocharis cardamines;Anthocharis cardamines;1;Anthocharis cardamines;0.999999940675226;  
 GU675837;Lepidoptera;Anthocharis euphenoides;NA;NA;Anthocharis euphenoides;0.960146267594346;  
 GU675838;Lepidoptera;Anthocharis cardamines;Anthocharis cardamines;1;Anthocharis cardamines;0.999999940675226;  
 GU675839;Lepidoptera;Pieris napi;NA;NA;Pieris napi;0.860244891707633;  
 GU675842;Lepidoptera;Pieris napi;NA;NA;Pieris napi;0.93839557695923;  
 GU675845;Lepidoptera;Coenonympha pamphilus;Coenonympha pamphilus;1;Coenonympha pamphilus;0.999999999999915;  
 GU675847;Lepidoptera;Coenonympha arcania;NA;0.172;Coenonympha arcania;0.963036309473038;  
 GU675848;Lepidoptera;Coenonympha pamphilus;Coenonympha pamphilus;1;Coenonympha pamphilus;0.999999999999915;  
 GU675849;Lepidoptera;Colias phicomone;Colias phicomone;0.001;Colias phicomone;0.986802434025645;  
 GU675850;Lepidoptera;Colias phicomone;Colias phicomone;0.001;Colias phicomone;0.986802434025645;  
 GU675851;Lepidoptera;Colias crocea;NA;0.059;NA;0.999999999999738;  
 GU675852;Lepidoptera;Colias crocea;NA;0.059;NA;0.999999999999738;  
 GU675853;Lepidoptera;Aporia crataegi;NA;NA;Aporia crataegi;0.999996781126733;  
 GU675854;Lepidoptera;Maniola tithonus;Pyronia tithonus;1;Pyronia tithonus;1;  
 GU675856;Lepidoptera;Papilio machaon;Papilio machaon;0.007;Papilio machaon;0.998348042131142;  
 GU675858;Lepidoptera;Maniola jurtina;NA;0.001;Maniola jurtina;0.939220105860875;  
 GU675860;Lepidoptera;Lycaena phlaeas;Lycaena phlaeas;1;Lycaena phlaeas;0.999999996363186;  
 GU675861;Lepidoptera;Thymelicus acteon;Thymelicus acteon;1;Thymelicus acteon;0.9999999752248;  
 GU675862;Lepidoptera;Coenonympha glycerion;NA;0.156;Coenonympha glycerion;0.999998559347134;  
 GU675863;Lepidoptera;Pieris napi;NA;NA;Pieris napi;0.928562853666922;  
 GU675864;Lepidoptera;Ochlodes sylvanus;NA;0.316;Ochlodes sylvanus;0.996318754838625;  
 GU675865;Lepidoptera;Brintesia circe;Brintesia circe;1;Brintesia circe;0.99999898802064;  
 GU675867;Lepidoptera;Lampides boeticus;Lampides boeticus;1;Lampides boeticus;0.99999999545906;  
 GU675868;Lepidoptera;Pararge aegeria;Pararge aegeria;1;Pararge aegeria;0.999999999963165;  
 GU675869;Lepidoptera;Lasiommata maera;Lasiommata maera;1;Lasiommata maera;0.999997945450226;  
 GU675870;Lepidoptera;Carcharodus alceae;Carcharodus alceae;0.999;Carcharodus alceae;0.999999996339511;  
 GU675872;Lepidoptera;Papilio machaon;Papilio machaon;0.003;Papilio machaon;0.997288237409893;  
 GU675873;Lepidoptera;Cupido alcetas;NA;0.218;Cupido alcetas;0.833501983138177;  
 GU675875;Lepidoptera;Satyrium esculi;Satyrium esculi;1;Satyrium esculi;0.999999957367948;  
 GU675877;Lepidoptera;Callophrys rubi;NA;0.001;Callophrys rubi;0.99870518510598;  
 GU675878;Lepidoptera;Carcharodus alceae;Carcharodus alceae;0.999;Carcharodus alceae;0.999999996339511;  
 GU675881;Lepidoptera;Melitaea didyma;Melitaea didyma;1;Melitaea didyma;0.990041801198236;  
 GU675882;Lepidoptera;Pyrgus carthami;Pyrgus carthami;1;Pyrgus carthami;0.999998862764095;  
 GU675885;Lepidoptera;Maniola jurtina;NA;NA;Maniola jurtina;0.962772432769033;  
 GU675887;Lepidoptera;Hipparchia semele;NA;0.001;Hipparchia semele;0.812142709977226;  
 GU675888;Lepidoptera;Pyrgus carthami;Pyrgus carthami;1;Pyrgus carthami;0.999998623758851;  
 GU675890;Lepidoptera;Gonepteryx cleopatra;Gonepteryx cleopatra;0.998;Gonepteryx cleopatra;0.999118636582266;  
 GU675891;Lepidoptera;Polyommatus icarus;Polyommatus icarus;0.001;Polyommatus icarus;0.999851522482238;  
 GU675891;Lepidoptera;Polyommatus icarus;Polyommatus icarus;0.001;Polyommatus icarus;0.999851522482238;  
 GU675893;Lepidoptera;Pieris napi;NA;0.028;Pieris napi;0.888205720664699;  
 GU675896;Lepidoptera;Lysandra hispana;NA;NA;NA;0.999964115886992;  
 GU675907;Lepidoptera;Pyrgus armoricanus;Pyrgus armoricanus;1;Pyrgus armoricanus;0.999997353848817;  
 GU675908;Lepidoptera;Melitaea deione;Melitaea deione;1;Melitaea deione;0.999999999611504;

GU675909;Lepidoptera;Colias alfacariensis;Colias alfacariensis;0.001;Colias alfacariensis;0.999857790810452;  
 GU675912;Lepidoptera;Colias alfacariensis;Colias alfacariensis;0.001;Colias alfacariensis;0.999857790810452;  
 GU675914;Lepidoptera;Coenonympha pamphilus;Coenonympha pamphilus;1;Coenonympha pamphilus;0.99999999999886;  
 GU675925;Lepidoptera;Coenonympha glycerion;NA;0.083;Coenonympha glycerion;0.999999074492111;  
 GU675926;Lepidoptera;Maniola cecilia;Pyronia cecilia;1;Pyronia cecilia;1;  
 GU675927;Lepidoptera;Plebejus argus;Plebejus argus;0.014;Plebejus argus;0.979849220658559;  
 GU675928;Lepidoptera;Colias alfacariensis;Colias alfacariensis;0.001;Colias alfacariensis;0.999857790810452;  
 GU675929;Lepidoptera;Hipparchia hermione;Hipparchia hermione;1;Hipparchia hermione;0.999905429250471;  
 GU675930;Lepidoptera;Melitaea nevadensis;Melitaea celadussa;0.999;Melitaea celadussa;0.998819206090668;  
 GU675931;Lepidoptera;Lycaena virgaureae;NA;0.184;Lycaena virgaureae;0.999653824584039;  
 GU675935;Lepidoptera;Lycaena tityrus;Lycaena tityrus;1;Lycaena tityrus;0.999997855580031;  
 GU675936;Lepidoptera;Lysandra coridon;NA;NA;NA;0.999969135579956;  
 GU675937;Lepidoptera;Erebia euryale;NA;NA;Erebia euryale;0.971435689232499;  
 GU675942;Lepidoptera;Cupido alcetas;NA;0.218;Cupido alcetas;0.833501983138177;  
 GU675944;Lepidoptera;Favonius quercus;NA;NA;Favonius quercus;0.73046069582187;  
 GU675946;Lepidoptera;Hipparchia fagi;Hipparchia fagi;NA;Hipparchia fagi;0.973330290902851;  
 GU675947;Lepidoptera;Euphydryas aurinia;Euphydryas aurinia;0.014;Euphydryas aurinia;0.996180211940517;  
 GU675949;Lepidoptera;Coenonympha arcania;NA;0.06;Coenonympha arcania;0.960519110135242;  
 GU675950;Lepidoptera;Gonepteryx cleopatra;Gonepteryx cleopatra;0.001;Gonepteryx cleopatra;0.998992887085358;  
 GU675953;Lepidoptera;Brenthis ino;Brenthis ino;0.001;Brenthis ino;0.997741439264217;  
 GU675954;Lepidoptera;Charaxes jasius;Charaxes jasius;NA;Charaxes jasius;0.988941612024336;  
 GU675957;Lepidoptera;Colias crocea;NA;0.059;NA;0.99999999999738;  
 GU675958;Lepidoptera;Anthocharis euphenoides;NA;0.057;Anthocharis euphenoides;0.951171242535209;  
 GU675959;Lepidoptera;Colias phicomone;Colias phicomone;0.001;Colias phicomone;0.986802434025645;  
 GU675960;Lepidoptera;Colias crocea;NA;NA;NA;0.99999999999568;  
 GU675961;Lepidoptera;Celastrina argiolus;Celastrina argiolus;1;Celastrina argiolus;0.999527385150531;  
 GU675962;Lepidoptera;Colias alfacariensis;Colias alfacariensis;0.001;Colias alfacariensis;0.999857790810452;  
 GU675963;Lepidoptera;Lampides boeticus;Lampides boeticus;1;Lampides boeticus;0.99999999545906;  
 GU675964;Lepidoptera;Celastrina argiolus;Celastrina argiolus;1;Celastrina argiolus;0.999527385150531;  
 GU675965;Lepidoptera;Satyrium esculi;Satyrium esculi;1;Satyrium esculi;0.999999957367948;  
 GU675966;Lepidoptera;Satyrium ilicis;Satyrium ilicis;1;Satyrium ilicis;0.999999987901305;  
 GU675968;Lepidoptera;Satyrium spini;Satyrium spini;1;Satyrium spini;0.99998173309697;  
 GU675971;Lepidoptera;Polyommatus damon;Polyommatus damon;1;Polyommatus damon;0.999999959192594;  
 GU675975;Lepidoptera;Lysandra coridon;NA;NA;NA;0.999969135579956;  
 GU675976;Lepidoptera;Lysandra coridon;NA;NA;NA;0.999969135579956;  
 GU675977;Lepidoptera;Plebejus idas;NA;0.007;NA;0.999546324331549;  
 GU675979;Lepidoptera;Polyommatus celina;Polyommatus celina;0.001;Polyommatus celina;0.99999999717033;  
 GU675980;Lepidoptera;Polyommatus escheri;Polyommatus escheri;1;Polyommatus escheri;0.999999995351544;  
 GU675981;Lepidoptera;Lycaena phlaeas;Lycaena phlaeas;1;Lycaena phlaeas;0.999999996363186;  
 GU675982;Lepidoptera;Polyommatus celina;Polyommatus celina;0.001;Polyommatus celina;0.99999999717033;  
 GU675983;Lepidoptera;Lycaena phlaeas;Lycaena phlaeas;1;Lycaena phlaeas;0.999999996363186;  
 GU675984;Lepidoptera;Lycaena phlaeas;Lycaena phlaeas;1;Lycaena phlaeas;0.999999996363186;  
 GU675986;Lepidoptera;Lycaena virgaureae;NA;0.184;Lycaena virgaureae;0.999653824584039;  
 GU675993;Lepidoptera;Gonepteryx cleopatra;Gonepteryx cleopatra;0.998;Gonepteryx cleopatra;0.999118636582266;  
 GU675994;Lepidoptera;Gonepteryx cleopatra;Gonepteryx cleopatra;0.998;Gonepteryx cleopatra;0.999118636582266;  
 GU676001;Lepidoptera;Euphydryas aurinia;NA;0.001;Euphydryas aurinia;0.986569933454;  
 GU676003;Lepidoptera;Euphydryas aurinia;NA;0.001;Euphydryas aurinia;0.984263569279661;  
 GU676004;Lepidoptera;Euphydryas aurinia;NA;0.001;Euphydryas aurinia;0.984263569279661;  
 GU676005;Lepidoptera;Lasiommata megera;Lasiommata megera;0.995;Lasiommata megera;0.999279716854958;  
 GU676006;Lepidoptera;Melitaea nevadensis;Melitaea celadussa;1;Melitaea celadussa;0.999267524572691;  
 GU676007;Lepidoptera;Lasiommata megera;Lasiommata megera;1;Lasiommata megera;0.999928528239676;  
 GU676008;Lepidoptera;Lasiommata megera;Lasiommata megera;1;Lasiommata megera;0.999928528239676;  
 GU676009;Lepidoptera;Pararge aegeria;Pararge aegeria;1;Pararge aegeria;0.99999999365514;  
 GU676010;Lepidoptera;Pararge aegeria;Pararge aegeria;1;Pararge aegeria;0.99999999365514;  
 GU676011;Lepidoptera;Erebia neoridas;NA;NA;Erebia neoridas;0.994368810769763;  
 GU676013;Lepidoptera;Erebia euryale;NA;NA;Erebia euryale;0.93493911427573;  
 GU676014;Lepidoptera;Erebia neoridas;NA;NA;Erebia neoridas;0.994368810769763;  
 GU676015;Lepidoptera;Erebia oeme;NA;0.114;Erebia oeme;0.99999999830635;  
 GU676016;Lepidoptera;Erebia meolans;Erebia meolans;NA;Erebia meolans;0.999835953426128;  
 GU676018;Lepidoptera;Erebia oeme;NA;0.114;Erebia oeme;0.99999999830635;

GU676021;Lepidoptera;Satyrus actaea;Satyrus actaea;0.002;Satyrus actaea;0.998246235973604;  
GU676022;Lepidoptera;Satyrus ferula;Satyrus ferula;0.001;Satyrus ferula;0.995920305204187;  
GU676023;Lepidoptera;Aphantopus hyperantus;Aphantopus hyperantus;0.006;Aphantopus  
hyperantus;0.999998615504572;  
GU676024;Lepidoptera;Maniola jurtina;NA;0.168;Maniola jurtina;0.934856736346661;  
GU676025;Lepidoptera;Maniola cecilia;Pyronia cecilia;1;Pyronia cecilia;1;  
GU676026;Lepidoptera;Maniola cecilia;Pyronia cecilia;1;Pyronia cecilia;1;  
GU676027;Lepidoptera;Maniola cecilia;Pyronia cecilia;1;Pyronia cecilia;0.999999999999972;  
GU676028;Lepidoptera;Maniola cecilia;Pyronia cecilia;1;Pyronia cecilia;1;  
GU676029;Lepidoptera;Coenonympha arcania;Coenonympha arcania;0.022;Coenonympha  
arcania;0.98373278454791;  
GU676030;Lepidoptera;Maniola tithonus;Pyronia tithonus;1;Pyronia tithonus;1;  
GU676031;Lepidoptera;Coenonympha pamphilus;Coenonympha pamphilus;1;Coenonympha  
pamphilus;0.999999999995282;  
GU676032;Lepidoptera;Coenonympha dorus;Coenonympha dorus;1;Coenonympha dorus;0.99999999988259;  
GU676033;Lepidoptera;Coenonympha pamphilus;Coenonympha pamphilus;1;Coenonympha  
pamphilus;0.999999999995282;  
GU676034;Lepidoptera;Coenonympha pamphilus;Coenonympha pamphilus;1;Coenonympha  
pamphilus;0.999999999995282;  
GU676035;Lepidoptera;Hipparchia fidia;Hipparchia fidia;1;Hipparchia fidia;0.999999999999972;  
GU676036;Lepidoptera;Hipparchia fidia;Hipparchia fidia;1;Hipparchia fidia;1;  
GU676038;Lepidoptera;Hipparchia fidia;Hipparchia fidia;1;Hipparchia fidia;1;  
GU676041;Lepidoptera;Plebejus idas;NA;0.009;NA;0.99929488087288;  
GU676042;Lepidoptera;Celastrina argiolus;Celastrina argiolus;1;Celastrina  
argiolus;0.999537223294636;  
GU676047;Lepidoptera;Pyrgus alveus;NA;NA;Pyrgus alveus;0.931326683565012;  
GU676048;Lepidoptera;Pyrgus armoricanus;Pyrgus armoricanus;1;Pyrgus  
armoricanus;0.997478680096412;  
GU676049;Lepidoptera;Pyrgus armoricanus;Pyrgus armoricanus;1;Pyrgus  
armoricanus;0.999997353848817;  
GU676050;Lepidoptera;Pyrgus sidae;Pyrgus sidae;1;Pyrgus sidae;0.99996750457282;  
GU676051;Lepidoptera;Pyrgus armoricanus;Pyrgus armoricanus;1;Pyrgus  
armoricanus;0.997478680096412;  
GU676053;Lepidoptera;Pyrgus sidae;Pyrgus sidae;1;Pyrgus sidae;0.999973057661669;  
GU676060;Lepidoptera;Gonepteryx cleopatra;Gonepteryx cleopatra;1;Gonepteryx  
cleopatra;0.999518782695122;  
GU676065;Lepidoptera;Charaxes jasius;Charaxes jasius;0.001;Charaxes jasius;0.997689374666591;  
GU676066;Lepidoptera;Iphiclidides podalirius;NA;0.302;Iphiclidides podalirius;0.931082412606632;  
GU676070;Lepidoptera;Polyommatus eros;NA;0.001;Polyommatus eros;0.972333425517021;  
GU676078;Lepidoptera;Polyommatus celina;NA;0.072;Polyommatus celina;0.9999999999953559;  
GU676086;Lepidoptera;Plebejus argus;Plebejus argus;0.001;Plebejus argus;0.967036594263956;  
GU676087;Lepidoptera;Plebejus argus;Plebejus argus;0.008;Plebejus argus;0.978603339047252;  
GU676088;Lepidoptera;Cupido argiades;NA;0.499;NA;0.999999999984682;  
GU676089;Lepidoptera;Plebejus argus;Plebejus argus;0.003;Plebejus argus;0.990726105541344;  
GU676090;Lepidoptera;Cupido alcetas;NA;0.068;Cupido alcetas;0.88988907876118;  
GU676091;Lepidoptera;Cupido argiades;NA;0.499;NA;0.999999999984682;  
GU676094;Lepidoptera;Favonius quercus;NA;NA;Favonius quercus;0.73046069582187;  
GU676095;Lepidoptera;Favonius quercus;Favonius quercus;1;Favonius quercus;0.998074872649888;  
GU676096;Lepidoptera;Colias alfacariensis;Colias alfacariensis;0.001;Colias  
alfacariensis;0.999857790810452;  
GU676097;Lepidoptera;Colias alfacariensis;Colias alfacariensis;1;Colias  
alfacariensis;0.99986120827666;  
GU676098;Lepidoptera;Pieris napi;NA;0.028;Pieris napi;0.888205720664699;  
GU676102;Lepidoptera;Erebia euryale;NA;NA;Erebia euryale;0.93493911427573;  
GU676103;Lepidoptera;Maniola jurtina;Maniola jurtina;0.004;Maniola jurtina;0.985235775650841;  
GU676104;Lepidoptera;Satyrus actaea;Satyrus actaea;0.002;Satyrus actaea;0.998246235973604;  
GU676105;Lepidoptera;Satyrus actaea;Satyrus actaea;0.01;Satyrus actaea;0.94366382029787;  
GU676108;Lepidoptera;Hipparchia fidia;Hipparchia fidia;1;Hipparchia fidia;1;  
GU676110;Lepidoptera;Maniola tithonus;Pyronia tithonus;NA;Pyronia tithonus;1;  
GU676111;Lepidoptera;Maniola tithonus;Pyronia tithonus;1;Pyronia tithonus;1;  
GU676112;Lepidoptera;Lasiommata megera;Lasiommata megera;0.995;Lasiommata  
megera;0.999279716854958;  
GU676114;Lepidoptera;Melitaea parthenoides;Melitaea parthenoides;1;Melitaea  
parthenoides;0.999999993530452;  
GU676115;Lepidoptera;Lasiommata maera;Lasiommata maera;1;Lasiommata maera;0.999995306565851;  
GU676116;Lepidoptera;Melitaea parthenoides;Melitaea parthenoides;1;Melitaea  
parthenoides;0.99999999620502;  
GU676117;Lepidoptera;Melitaea parthenoides;Melitaea parthenoides;1;Melitaea  
parthenoides;0.999999993473381;  
GU676118;Lepidoptera;Euphydryas aurinia;Euphydryas aurinia;0.02;Euphydryas  
aurinia;0.99668249939786;  
GU676119;Lepidoptera;Araschnia levana;Araschnia levana;1;Araschnia levana;0.999999772187832;  
GU676120;Lepidoptera;Araschnia levana;Araschnia levana;1;Araschnia levana;0.999999772187832;  
GU676127;Lepidoptera;Coenonympha dorus;Coenonympha dorus;1;Coenonympha dorus;0.999999999743835;  
GU676129;Lepidoptera;Coenonympha dorus;Coenonympha dorus;1;Coenonympha dorus;0.999999999943213;  
GU676130;Lepidoptera;Brenthis daphne;Brenthis daphne;1;Brenthis daphne;0.997627940680404;  
GU676134;Lepidoptera;Erebia euryale;NA;NA;Erebia euryale;0.93493911427573;  
GU676135;Lepidoptera;Satyrium ilicis;Satyrium ilicis;1;Satyrium ilicis;0.999999987901305;

GU676137;Lepidoptera;Brenthis daphne;Brenthis daphne;1;Brenthis daphne;0.997172799742872;  
 GU676138;Lepidoptera;Melitaea didyma;Melitaea didyma;NA;Melitaea didyma;0.980272836986251;  
 GU676139;Lepidoptera;Hipparchia semele;Hipparchia semele;0.001;Hipparchia  
 semele;0.8854726660975;  
 GU676140;Lepidoptera;Polyommatus escheri;Polyommatus escheri;1;Polyommatus  
 escheri;0.99999984088305;  
 GU676141;Lepidoptera;Lampides boeticus;Lampides boeticus;1;Lampides boeticus;0.99999998557229;  
 GU676142;Lepidoptera;Maniola jurtina;NA;0.001;Maniola jurtina;0.939220105860875;  
 GU676144;Lepidoptera;Satyrium esculi;Satyrium esculi;1;Satyrium esculi;0.99999957367948;  
 GU676147;Lepidoptera;Phengaris arion;NA;0.009;Phengaris arion;0.834433860638034;  
 GU676148;Lepidoptera;Melitaea nevadensis;Melitaea celadussa;0.994;Melitaea  
 celadussa;0.995853651157716;  
 GU676149;Lepidoptera;Polyommatus escheri;Polyommatus escheri;1;Polyommatus  
 escheri;0.99999989429227;  
 GU676150;Lepidoptera;Melitaea deione;Melitaea deione;1;Melitaea deione;0.99999998728185;  
 GU676151;Lepidoptera;Satyrus ferula;Satyrus ferula;0.001;Satyrus ferula;0.9958095881137;  
 GU676153;Lepidoptera;Cupido osiris;Cupido osiris;1;Cupido osiris;0.999974988645513;  
 GU676154;Lepidoptera;Ochlodes sylvanus;NA;0.316;Ochlodes sylvanus;0.996318754838625;  
 GU676155;Lepidoptera;Hipparchia semele;NA;NA;Hipparchia semele;0.845949489688888;  
 GU676156;Lepidoptera;Gonepteryx cleopatra;Gonepteryx cleopatra;0.998;Gonepteryx  
 cleopatra;0.999118636582266;  
 GU676157;Lepidoptera;Hipparchia fidia;Hipparchia fidia;1;Hipparchia fidia;1;  
 GU676159;Lepidoptera;Melitaea deione;Melitaea deione;1;Melitaea deione;0.9999999580632;  
 GU676160;Lepidoptera;Carcharodus lavatherae;Carcharodus lavatherae;1;Carcharodus  
 lavatherae;0.999975293871709;  
 GU676161;Lepidoptera;Melitaea nevadensis;Melitaea celadussa;0.999;Melitaea  
 celadussa;0.998819206090668;  
 GU676163;Lepidoptera;Argynnis aglaja;NA;0.005;Speyeria aglaja;0.896438572419641;  
 GU676164;Lepidoptera;Melitaea parthenoides;Melitaea parthenoides;1;Melitaea  
 parthenoides;0.999999968152765;  
 GU676165;Lepidoptera;Satyrium acaciae;Satyrium acaciae;1;Satyrium acaciae;0.99999991343697;  
 GU676166;Lepidoptera;Cercyonis lupina;Hyponephele lupina;1;Hyponephele lupina;0.99999998018663;  
 GU676167;Lepidoptera;Thymelicus lineola;Thymelicus lineola;1;Thymelicus  
 lineola;0.999999096983497;  
 GU676168;Lepidoptera;Thymelicus lineola;Thymelicus lineola;1;Thymelicus  
 lineola;0.999999080121537;  
 GU676169;Lepidoptera;Nymphalis c-album;NA;0.207;NA;0.999998867685115;  
 GU676172;Lepidoptera;Carcharodus alceae;Carcharodus alceae;1;Carcharodus  
 alceae;0.99999997554852;  
 GU676173;Lepidoptera;Brintesia circe;Brintesia circe;1;Brintesia circe;0.999999572713085;  
 GU676174;Lepidoptera;Plebejus argus;Plebejus argus;1;Plebejus argus;0.996350867978009;  
 GU676175;Lepidoptera;Ochlodes sylvanus;NA;0.316;Ochlodes sylvanus;0.996318754838625;  
 GU676176;Lepidoptera;Satyrium esculi;Satyrium esculi;1;Satyrium esculi;0.99999957367948;  
 GU676178;Lepidoptera;Melitaea cinxia;Melitaea cinxia;1;Melitaea cinxia;0.99999999999659;  
 GU676179;Lepidoptera;Thymelicus sylvestris;Thymelicus sylvestris;1;Thymelicus  
 sylvestris;0.999999985935205;  
 GU676180;Lepidoptera;Cercyonis lupina;Hyponephele lupina;1;Hyponephele lupina;0.999999952251103;  
 GU676181;Lepidoptera;Gegenes nostrodamus;Gegenes nostrodamus;1;Gegenes  
 nostrodamus;0.99999996883645;  
 GU676182;Lepidoptera;Gegenes nostrodamus;Gegenes nostrodamus;1;Gegenes  
 nostrodamus;0.99999996883645;  
 GU676183;Lepidoptera;Thymelicus acteon;Thymelicus acteon;1;Thymelicus acteon;0.99999999752248;  
 GU676184;Lepidoptera;Lasiommata maera;Lasiommata maera;1;Lasiommata maera;0.999997945450226;  
 GU676186;Lepidoptera;Lasiommata maera;Lasiommata maera;1;Lasiommata maera;0.999997945450226;  
 GU676190;Lepidoptera;Lasiommata maera;Lasiommata maera;1;Lasiommata maera;0.999997945450226;  
 GU676191;Lepidoptera;Aglais urticae;NA;0.002;Aglais urticae;0.987497593219019;  
 GU676195;Lepidoptera;Brenthis daphne;Brenthis daphne;0.001;Brenthis daphne;0.997781825264304;  
 GU676197;Lepidoptera;Lasiommata maera;Lasiommata maera;1;Lasiommata maera;0.999997660206086;  
 GU676198;Lepidoptera;Lycaena virgaureae;Lycaena virgaureae;0.025;Lycaena  
 virgaureae;0.999833961481754;  
 GU676200;Lepidoptera;Satyrium spini;Satyrium spini;1;Satyrium spini;0.999997876872024;  
 GU676201;Lepidoptera;Erebia meolans;Erebia meolans;NA;Erebia meolans;0.99957934552327;  
 GU676203;Lepidoptera;Argynnis paphia;Argynnis paphia;1;Argynnis paphia;0.99999991389927;  
 GU676204;Lepidoptera;Hipparchia semele;Hipparchia semele;0.001;Hipparchia  
 semele;0.926224616831104;  
 GU676205;Lepidoptera;Chazara briseis;Chazara briseis;0.005;Chazara briseis;0.999971123216223;  
 GU676206;Lepidoptera;Hipparchia semele;NA;0.004;Hipparchia semele;0.752871175214561;  
 GU676207;Lepidoptera;Satyrium ilicis;Satyrium ilicis;1;Satyrium ilicis;0.99999987901305;  
 GU676208;Lepidoptera;Lycaena virgaureae;Lycaena virgaureae;0.025;Lycaena  
 virgaureae;0.999833961481754;  
 GU676209;Lepidoptera;Nymphalis c-album;NA;0.08;NA;0.999996025433302;  
 GU676210;Lepidoptera;Aphantopus hyperantus;Aphantopus hyperantus;0.003;Aphantopus  
 hyperantus;0.99999455871523;  
 GU676211;Lepidoptera;Brenthis hecate;NA;0.068;Brenthis hecate;0.999053551498733;  
 GU676215;Lepidoptera;Fabriciana adippe;Fabriciana adippe;0.001;Fabriciana  
 adippe;0.999538788643547;  
 GU676216;Lepidoptera;Coenonympha dorus;Coenonympha dorus;1;Coenonympha dorus;0.99999999915957;

GU676217;Lepidoptera;Carcharodus lavatherae;Carcharodus lavatherae;1;Carcharodus lavatherae;0.999975293871709;  
GU676219;Lepidoptera;Satyrium spini;Satyrium spini;1;Satyrium spini;0.999997334596599;  
GU676221;Lepidoptera;Brenthis ino;Brenthis ino;0.001;Brenthis ino;0.997741439264217;  
GU676223;Lepidoptera;Polyommatus damon;Polyommatus damon;1;Polyommatus damon;0.999999939976279;  
GU676224;Lepidoptera;Polyommatus damon;Polyommatus damon;1;Polyommatus damon;0.999999924215334;  
GU676228;Lepidoptera;Plebejus idas;NA;0.001;NA;0.999367461111577;  
GU676231;Lepidoptera;Brenthis ino;Brenthis ino;0.999;Brenthis ino;0.998672633091632;  
GU676232;Lepidoptera;Satyrium acaciae;Satyrium acaciae;1;Satyrium acaciae;0.99999991343697;  
GU676233;Lepidoptera;Satyrium ilicis;Satyrium ilicis;1;Satyrium ilicis;0.999999987901305;  
GU676236;Lepidoptera;Plebejus idas;NA;0.001;NA;0.999590911470354;  
GU676237;Lepidoptera;Boloria dia;Boloria dia;1;Boloria dia;0.99999999980503;  
GU676238;Lepidoptera;Satyrium acaciae;Satyrium acaciae;1;Satyrium acaciae;0.999999453316214;  
GU676239;Lepidoptera;Satyrium spini;Satyrium spini;1;Satyrium spini;0.999997334596599;  
GU676244;Lepidoptera;Melitaea nevadensis;Melitaea celadussa;0.999;Melitaea celadussa;0.998819206090668;  
GU676245;Lepidoptera;Boloria dia;Boloria dia;1;Boloria dia;0.99999999980503;  
GU676246;Lepidoptera;Brenthis daphne;Brenthis daphne;0.001;Brenthis daphne;0.997781825264304;  
GU676247;Lepidoptera;Melitaea didyma;Melitaea didyma;1;Melitaea didyma;0.996477093809569;  
GU676248;Lepidoptera;Brenthis hecate;NA;0.068;Brenthis hecate;0.999053551498733;  
GU676249;Lepidoptera;Maniola tithonus;Pyronia tithonus;1;Pyronia tithonus;0.99999999999972;  
GU676250;Lepidoptera;Satyrium esculi;Satyrium esculi;1;Satyrium esculi;0.999999957367948;  
GU676251;Lepidoptera;Fabriciana niobe;NA;0.001;Fabriciana niobe;0.924679661444846;  
GU676252;Lepidoptera;Coenonympha arcania;NA;0.172;Coenonympha arcania;0.963036309473038;  
GU676253;Lepidoptera;Coenonympha arcania;NA;0.172;Coenonympha arcania;0.963036309473038;  
GU676256;Lepidoptera;Melitaea didyma;Melitaea didyma;1;Melitaea didyma;0.996366765827355;  
GU676259;Lepidoptera;Hipparchia hermione;Hipparchia hermione;1;Hipparchia hermione;0.999765856753897;  
GU676260;Lepidoptera;Polyommatus amandus;Polyommatus amandus;0.001;Polyommatus amandus;0.999982520055691;  
GU676271;Lepidoptera;Melitaea parthenoides;Melitaea parthenoides;1;Melitaea parthenoides;0.999999968152765;  
GU676272;Lepidoptera;Pieris napi;NA;0.011;Pieris napi;0.801985394724814;  
GU676273;Lepidoptera;Melitaea cinxia;Melitaea cinxia;1;Melitaea cinxia;0.999999999999659;  
GU676276;Lepidoptera;Polyommatus dorylas;Polyommatus dorylas;0.025;Polyommatus dorylas;0.973229109265438;  
GU676277;Lepidoptera;Argynnis aglaja;NA;NA;NA;0.999999999998776;  
GU676278;Lepidoptera;Polyommatus amandus;Polyommatus amandus;0.002;Polyommatus amandus;0.999895064798667;  
GU676279;Lepidoptera;Polyommatus escheri;Polyommatus escheri;1;Polyommatus escheri;0.999997480524106;  
GU676281;Lepidoptera;Satyrium acaciae;Satyrium acaciae;1;Satyrium acaciae;0.99999991343697;  
GU676282;Lepidoptera;Plebejus argus;NA;0.04;Plebejus argus;0.972686995581077;  
GU676283;Lepidoptera;Melitaea cinxia;Melitaea cinxia;1;Melitaea cinxia;0.999999999999659;  
GU676284;Lepidoptera;Coenonympha glycerion;NA;0.221;Coenonympha glycerion;0.999998704466507;  
GU676286;Lepidoptera;Hamearis lucina;NA;NA;Hamearis lucina;0.999999999984141;  
GU676290;Lepidoptera;Melitaea trivia;Melitaea trivia;1;Melitaea trivia;0.999999999908766;  
GU676291;Lepidoptera;Plebejus argus;Plebejus argus;0.01;Plebejus argus;0.979195638958128;  
GU676292;Lepidoptera;Satyrium esculi;Satyrium esculi;1;Satyrium esculi;0.999999957367948;  
GU676296;Lepidoptera;Lasiommata megera;Lasiommata megera;1;Lasiommata megera;0.99994902516581;  
GU676297;Lepidoptera;Pieris napi;NA;0.028;Pieris napi;0.843942654364311;  
GU676298;Lepidoptera;Glaucopsyche alexis;Glaucopsyche alexis;0.001;Glaucopsyche alexis;0.994667256195263;  
GU676299;Lepidoptera;Euphydryas aurinia;Euphydryas aurinia;0.016;Euphydryas aurinia;0.997751503369639;  
GU676304;Lepidoptera;Argynnis aglaja;NA;NA;NA;0.999999999995822;  
GU676305;Lepidoptera;Gonepteryx rhamni;Gonepteryx rhamni;0.002;Gonepteryx rhamni;0.999788876860678;  
GU676306;Lepidoptera;Glaucopsyche melanops;Glaucopsyche melanops;1;Glaucopsyche melanops;0.999952924254607;  
GU676308;Lepidoptera;Pyrgus serratulae;Pyrgus serratulae;1;Pyrgus serratulae;0.99999949307896;  
GU676313;Lepidoptera;Melitaea deione;Melitaea deione;1;Melitaea deione;0.999999983690515;  
GU676314;Lepidoptera;Aporia crataegi;NA;0.002;Aporia crataegi;0.999996938385945;  
GU676315;Lepidoptera;Maniola tithonus;Pyronia tithonus;1;Pyronia tithonus;1;  
GU676320;Lepidoptera;Melitaea parthenoides;Melitaea parthenoides;1;Melitaea parthenoides;0.999999978339219;  
GU676321;Lepidoptera;Melitaea cinxia;Melitaea cinxia;1;Melitaea cinxia;0.999999999999659;  
GU676322;Lepidoptera;Melitaea trivia;Melitaea trivia;1;Melitaea trivia;0.999999999938666;  
GU676323;Lepidoptera;Aglaia urticae;NA;0.002;Aglaia urticae;0.987497593219019;  
GU676324;Lepidoptera;Coenonympha glycerion;NA;0.134;Coenonympha glycerion;0.999998730379228;  
GU676325;Lepidoptera;Fabriciana niobe;NA;0.035;Fabriciana niobe;0.949480222958778;  
GU676326;Lepidoptera;Aricia eumedon;Eumedonia eumedon;1;Eumedonia eumedon;0.993730847153741;  
GU676327;Lepidoptera;Aricia eumedon;Eumedonia eumedon;1;Eumedonia eumedon;0.993730847153741;  
GU676329;Lepidoptera;Cyaniris semiargus;NA;NA;Cyaniris semiargus;0.999066914949168;  
GU676330;Lepidoptera;Lasiommata megera;Lasiommata megera;1;Lasiommata megera;0.999928528239676;  
GU676331;Lepidoptera;Polyommatus celina;NA;0.072;Polyommatus celina;0.999999999953559;  
GU676333;Lepidoptera;Celastrina argiolus;Celastrina argiolus;1;Celastrina argiolus;0.999527385150531;



GU676341;Lepidoptera;Maniola jurtina;NA;0.001;Maniola jurtina;0.939220105860875;  
GU676342;Lepidoptera;Satyrium esculi;Satyrium esculi;1;Satyrium esculi;0.999999957367948;  
GU676343;Lepidoptera;Maniola cecilia;Pyronia cecilia;NA;Pyronia cecilia;1;  
GU676344;Lepidoptera;Carcharodus baeticus;Carcharodus baeticus;1;Carcharodus  
baeticus;0.999983899664537;  
GU676345;Lepidoptera;Coenonympha dorus;Coenonympha dorus;1;Coenonympha dorus;0.99999999041165;  
GU676346;Lepidoptera;Callophrys avis;Callophrys avis;1;Callophrys avis;0.992335035373355;  
GU676347;Lepidoptera;Callophrys avis;Callophrys avis;1;Callophrys avis;0.992335035373355;  
GU676348;Lepidoptera;Aricia eumedon;Eumedonia eumedon;0.002;Eumedonia eumedon;0.995876443425412;  
GU676350;Lepidoptera;Pyrgus serratulae;Pyrgus serratulae;1;Pyrgus serratulae;0.999999822628057;  
GU676353;Lepidoptera;Gegenes nostrodamus;Gegenes nostrodamus;1;Gegenes  
nostrodamus;0.99999996883645;  
GU676355;Lepidoptera;Arethusana arethusa;Arethusana arethusa;1;Arethusana  
arethusa;0.999999801603556;  
GU676359;Lepidoptera;Aricia eumedon;Eumedonia eumedon;0.001;Eumedonia eumedon;0.997136200888682;  
GU676362;Lepidoptera;Lysandra coridon;NA;NA;NA;0.999976559473762;  
GU676363;Lepidoptera;Lysandra coridon;NA;NA;NA;0.999976559473762;  
GU676367;Lepidoptera;Polyommatus daphnis;NA;0.031;Polyommatus daphnis;0.989661132749926;  
GU676368;Lepidoptera;Lysandra hispana;NA;NA;NA;0.999978182264605;  
GU676370;Lepidoptera;Hipparchia fidia;Hipparchia fidia;1;Hipparchia fidia;1;  
GU676372;Lepidoptera;Polyommatus icarus;NA;0.029;Polyommatus icarus;0.828260567531005;  
GU676373;Lepidoptera;Lysandra hispana;NA;NA;NA;0.999963114385083;  
GU676374;Lepidoptera;Maniola jurtina;NA;0.001;Maniola jurtina;0.939220105860875;  
GU676375;Lepidoptera;Hipparchia fidia;Hipparchia fidia;1;Hipparchia fidia;1;  
GU676377;Lepidoptera;Lysandra hispana;NA;NA;NA;0.99981082296412;  
GU676379;Lepidoptera;Lysandra hispana;Lysandra hispana;NA;Lysandra hispana;0.712402577741674;  
GU676380;Lepidoptera;Maniola tithonus;Pyronia tithonus;NA;Pyronia tithonus;1;  
GU676381;Lepidoptera;Hipparchia semele;NA;0.002;Hipparchia semele;0.767063813608107;  
GU676382;Lepidoptera;Satyrus actaea;Satyrus actaea;0.999;Satyrus actaea;0.999013870742133;  
GU676383;Lepidoptera;Lysandra hispana;NA;NA;NA;0.999883930469524;  
GU676384;Lepidoptera;Colias alfacariensis;Colias alfacariensis;0.001;Colias  
alfacariensis;0.999857790810452;  
GU676385;Lepidoptera;Brenthis hecate;NA;0.068;Brenthis hecate;0.999053551498733;  
GU676388;Lepidoptera;Coenonympha dorus;Coenonympha dorus;1;Coenonympha dorus;0.9999999988259;  
GU676392;Lepidoptera;Brenthis ino;Brenthis ino;0.998;Brenthis ino;0.995325118916732;  
GU676393;Lepidoptera;Polyommatus damon;Polyommatus damon;1;Polyommatus damon;0.999999435300384;  
GU676394;Lepidoptera;Arethusana arethusa;Arethusana arethusa;0.045;Arethusana  
arethusa;0.999962297609568;  
GU676395;Lepidoptera;Melitaea didyma;Melitaea didyma;1;Melitaea didyma;0.998761608110557;  
GU676396;Lepidoptera;Brenthis ino;Brenthis ino;0.998;Brenthis ino;0.995325118916732;  
GU676399;Lepidoptera;Polyommatus escheri;Polyommatus escheri;1;Polyommatus  
escheri;0.999999984824285;  
GU676402;Lepidoptera;Polyommatus amandus;Polyommatus amandus;0.001;Polyommatus  
amandus;0.999984793725812;  
GU676404;Lepidoptera;Melitaea parthenoides;Melitaea parthenoides;1;Melitaea  
parthenoides;0.99999993530452;  
GU676405;Lepidoptera;Polyommatus damon;Polyommatus damon;1;Polyommatus damon;0.999999721622043;  
GU676407;Lepidoptera;Hipparchia semele;NA;0.001;Hipparchia semele;0.862655722502182;  
GU676408;Lepidoptera;Plebejus idas;NA;0.001;NA;0.999163905769696;  
GU676409;Lepidoptera;Plebejus argus;Plebejus argus;0.008;Plebejus argus;0.982355058519351;  
GU676415;Lepidoptera;Satyrus actaea;NA;0.001;Satyrus actaea;0.992438087901691;  
GU676417;Lepidoptera;Fabriciana niobe;NA;0.035;Fabriciana niobe;0.949480222958778;  
GU676419;Lepidoptera;Colias alfacariensis;Colias alfacariensis;0.001;Colias  
alfacariensis;0.999857790810452;  
GU676421;Lepidoptera;Plebejus argus;Plebejus argus;0.003;Plebejus argus;0.990726105541344;  
GU676423;Lepidoptera;Aglais urticae;Aglais urticae;0.004;Aglais urticae;0.995016750255472;  
GU676424;Lepidoptera;Polyommatus amandus;Polyommatus amandus;0.001;Polyommatus  
amandus;0.999982544243848;  
GU676425;Lepidoptera;Argynnis aglaja;NA;NA;NA;0.99999999998776;  
GU676426;Lepidoptera;Coenonympha arcania;NA;0.172;Coenonympha arcania;0.963036309473038;  
GU676427;Lepidoptera;Lycaena phlaeas;Lycaena phlaeas;1;Lycaena phlaeas;0.999999996363186;  
GU676429;Lepidoptera;Plebejus argus;Plebejus argus;1;Plebejus argus;0.995486594467474;  
GU676430;Lepidoptera;Polyommatus escheri;Polyommatus escheri;1;Polyommatus  
escheri;0.999999989738654;  
GU676431;Lepidoptera;Glaucopsyche alexis;NA;NA;Glaucopsyche alexis;0.991537790028883;  
GU676432;Lepidoptera;Cupido osiris;Cupido osiris;1;Cupido osiris;0.999999815277948;  
GU676433;Lepidoptera;Lasiommata megera;Lasiommata megera;1;Lasiommata megera;0.999928528239676;  
GU676436;Lepidoptera;Euphydryas aurinia;Euphydryas aurinia;0.02;Euphydryas  
aurinia;0.99668249939786;  
GU676438;Lepidoptera;Polyommatus celina;Polyommatus celina;0.009;Polyommatus  
celina;0.99999999949694;  
GU676439;Lepidoptera;Coenonympha pamphilus;Coenonympha pamphilus;1;Coenonympha  
pamphilus;0.99999999999488;  
GU676440;Lepidoptera;Satyrium spini;Satyrium spini;1;Satyrium spini;0.999999026999281;  
GU676444;Lepidoptera;Lampides boeticus;Lampides boeticus;1;Lampides boeticus;0.99999999545906;  
GU676445;Lepidoptera;Satyrium spini;Satyrium spini;1;Satyrium spini;0.999999026999281;  
GU676447;Lepidoptera;Aricia cramera;Aricia cramera;1;Aricia cramera;0.999993731037033;  
GU676448;Lepidoptera;Anthocharis euphenoides;NA;0.172;Anthocharis euphenoides;0.943741664916385;

GU676453;Lepidoptera;Anthocharis cardamines;Anthocharis cardamines;1;Anthocharis cardamines;0.999999951562672;  
GU676455;Lepidoptera;Lycaena phlaeas;Lycaena phlaeas;1;Lycaena phlaeas;0.999999996363186;  
GU676457;Lepidoptera;Callophrys rubi;NA;0.002;Callophrys rubi;0.998152239914699;  
GU676458;Lepidoptera;Glaucopsyche melanops;Glaucopsyche melanops;1;Glaucopsyche melanops;0.999953769170809;  
GU676463;Lepidoptera;Maniola jurtina;NA;NA;Maniola jurtina;0.951182761228822;  
GU676464;Lepidoptera;Melitaea didyma;Melitaea didyma;1;Melitaea didyma;0.999727166931204;  
GU676465;Lepidoptera;Aporia crataegi;NA;0.002;Aporia crataegi;0.999996497444636;  
GU676466;Lepidoptera;Cyranis semiargus;NA;NA;Cyranis semiargus;0.998973546847411;  
GU676472;Lepidoptera;Cupido minimus;NA;0.009;Cupido minimus;0.999791453712643;  
GU676477;Lepidoptera;Polyommatus escheri;Polyommatus escheri;1;Polyommatus escheri;0.999999994765119;  
GU676478;Lepidoptera;Polyommatus escheri;Polyommatus escheri;1;Polyommatus escheri;0.999999998529631;  
GU676479;Lepidoptera;Polyommatus escheri;Polyommatus escheri;1;Polyommatus escheri;0.999999998529631;  
GU676481;Lepidoptera;Polyommatus escheri;Polyommatus escheri;1;Polyommatus escheri;0.999998281574049;  
GU676482;Lepidoptera;Polyommatus escheri;Polyommatus escheri;1;Polyommatus escheri;0.999999997873005;  
GU676484;Lepidoptera;Polyommatus icarus;Polyommatus icarus;1;Polyommatus icarus;0.988670826309563;  
GU676487;Lepidoptera;Anthocharis euphenoides;NA;0.12;Anthocharis euphenoides;0.931402619863286;  
GU676489;Lepidoptera;Polyommatus icarus;Polyommatus icarus;0.001;Polyommatus icarus;0.977842229419285;  
GU676490;Lepidoptera;Plebejus idas;NA;0.001;NA;0.999163905769696;  
GU676491;Lepidoptera;Fabriciana niobe;NA;0.035;Fabriciana niobe;0.949480222958778;  
GU676492;Lepidoptera;Melitaea parthenoides;Melitaea parthenoides;1;Melitaea parthenoides;0.999999993530452;  
GU676494;Lepidoptera;Melitaea parthenoides;Melitaea parthenoides;1;Melitaea parthenoides;0.99999997819765;  
GU676499;Lepidoptera;Plebejus argus;Plebejus argus;0.003;Plebejus argus;0.991225116398388;  
GU676500;Lepidoptera;Colias crocea;NA;0.059;NA;0.99999999999738;  
GU676501;Lepidoptera;Coenonympha glycerion;NA;0.157;Coenonympha glycerion;0.999999004304256;  
GU676504;Lepidoptera;Maniola jurtina;NA;0.001;Maniola jurtina;0.939220105860875;  
GU676505;Lepidoptera;Callophrys rubi;NA;0.001;Callophrys rubi;0.99870518510598;  
GU676506;Lepidoptera;Cupido minimus;NA;0.009;Cupido minimus;0.999791453712643;  
GU676508;Lepidoptera;Coenonympha glycerion;NA;0.284;Coenonympha glycerion;0.999998676061348;  
GU676509;Lepidoptera;Cupido osiris;Cupido osiris;1;Cupido osiris;0.999999791352473;  
GU676510;Lepidoptera;Glaucopsyche alexis;Glaucopsyche alexis;0.001;Glaucopsyche alexis;0.994667256195263;  
GU676511;Lepidoptera;Euphydryas aurinia;Euphydryas aurinia;0.016;Euphydryas aurinia;0.997751503369639;  
GU676512;Lepidoptera;Anthocharis cardamines;Anthocharis cardamines;1;Anthocharis cardamines;0.999999895074103;  
GU676516;Lepidoptera;Argynnis aglaja;NA;NA;NA;0.999999999998776;  
GU676517;Lepidoptera;Lampides boeticus;Lampides boeticus;1;Lampides boeticus;0.999999999411585;  
GU676519;Lepidoptera;Anthocharis euphenoides;NA;0.12;Anthocharis euphenoides;0.931402619863286;  
GU676520;Lepidoptera;Cupido minimus;NA;0.026;Cupido minimus;0.999181550941374;  
GU676521;Lepidoptera;Hamearis lucina;NA;NA;Hamearis lucina;0.99999999984141;  
GU676522;Lepidoptera;Callophrys avis;Callophrys avis;1;Callophrys avis;0.992335035373355;  
GU676524;Lepidoptera;Aporia crataegi;NA;0.009;Aporia crataegi;0.999996613335036;  
GU676527;Lepidoptera;Fabriciana adippe;Fabriciana adippe;1;Fabriciana adippe;0.999446572009028;  
GU676528;Lepidoptera;Lasiommata megera;Lasiommata megera;1;Lasiommata megera;0.999943800289156;  
GU676532;Lepidoptera;Callophrys avis;Callophrys avis;1;Callophrys avis;0.994873005421139;  
GU676533;Lepidoptera;Callophrys avis;Callophrys avis;1;Callophrys avis;0.992335035373355;  
GU676536;Lepidoptera;Anthocharis euphenoides;NA;0.172;Anthocharis euphenoides;0.943741664916385;  
GU676540;Lepidoptera;Thymelicus sylvestris;Thymelicus sylvestris;1;Thymelicus sylvestris;0.999999985935205;  
GU676541;Lepidoptera;Lampides boeticus;Lampides boeticus;1;Lampides boeticus;0.999999999545906;  
GU676542;Lepidoptera;Plebejus argus;Plebejus argus;0.014;Plebejus argus;0.979849220658559;  
GU676543;Lepidoptera;Lasiommata megera;Lasiommata megera;1;Lasiommata megera;0.999928528239676;  
GU676547;Lepidoptera;Lycaena phlaeas;Lycaena phlaeas;1;Lycaena phlaeas;0.999999996363186;  
GU676548;Lepidoptera;Hipparchia hermione;Hipparchia hermione;0.001;Hipparchia hermione;0.999954661253629;  
GU676549;Lepidoptera;Coenonympha dorus;Coenonympha dorus;1;Coenonympha dorus;0.999999999798803;  
GU676550;Lepidoptera;Coenonympha glycerion;NA;0.176;Coenonympha glycerion;0.999998747950729;  
GU676551;Lepidoptera;Coenonympha glycerion;NA;0.083;Coenonympha glycerion;0.999999102623609;  
GU676552;Lepidoptera;Maniola jurtina;NA;0.001;Maniola jurtina;0.939220105860875;  
GU676553;Lepidoptera;Maniola tithonus;Pyronia tithonus;NA;Pyronia tithonus;1;  
GU676556;Lepidoptera;Nymphalis c-album;NA;0.215;NA;0.999999192918557;  
GU676557;Lepidoptera;Ochlodes sylvanus;NA;0.316;Ochlodes sylvanus;0.996318754838625;  
GU676558;Lepidoptera;Colias crocea;NA;NA;NA;0.99999999999584;  
GU676559;Lepidoptera;Gonepteryx rhamni;Gonepteryx rhamni;1;Gonepteryx rhamni;0.999850170258883;  
GU676561;Lepidoptera;Fabriciana adippe;Fabriciana adippe;0.001;Fabriciana adippe;0.999538788643547;

GU676562;Lepidoptera;Melitaea nevadensis;Melitaea celadussa;0.999;Melitaea celadussa;0.998819206090668;  
GU676563;Lepidoptera;Satyrium spini;Satyrium spini;1;Satyrium spini;0.999994528861254;  
GU676565;Lepidoptera;Thymelicus acteon;Thymelicus acteon;1;Thymelicus acteon;0.9999999752248;  
GU676567;Lepidoptera;Brintesia circe;Brintesia circe;1;Brintesia circe;0.999995749349661;  
GU676569;Lepidoptera;Polyommatus icarus;Polyommatus icarus;0.001;Polyommatus icarus;0.999851522482238;  
GU676570;Lepidoptera;Melitaea parthenoides;Melitaea parthenoides;1;Melitaea parthenoides;0.99999953314018;  
GU676571;Lepidoptera;Euphydryas aurinia;Euphydryas aurinia;0.016;Euphydryas aurinia;0.997751503369639;  
GU676572;Lepidoptera;Euphydryas aurinia;Euphydryas aurinia;0.016;Euphydryas aurinia;0.997751503369639;  
GU676573;Lepidoptera;Lycaena tityrus;Lycaena tityrus;1;Lycaena tityrus;0.999997855580031;  
GU676574;Lepidoptera;Glaucopsyche melanops;Glaucopsyche melanops;1;Glaucopsyche melanops;0.999952924254607;  
GU676575;Lepidoptera;Pararge aegeria;Pararge aegeria;1;Pararge aegeria;0.999999999963165;  
GU676577;Lepidoptera;Pieris napi;NA;0.009;Pieris napi;0.896514330886707;  
GU676579;Lepidoptera;Aporia crataegi;NA;NA;Aporia crataegi;0.999977873310658;  
GU676581;Lepidoptera;Coenonympha pamphilus;Coenonympha pamphilus;1;Coenonympha pamphilus;0.99999999999631;  
GU676583;Lepidoptera;Favonius quercus;Favonius quercus;0.001;Favonius quercus;0.998640139520663;  
GU676585;Lepidoptera;Fabriciana adippe;Fabriciana adippe;1;Fabriciana adippe;0.997025694784552;  
GU676586;Lepidoptera;Brintesia circe;Brintesia circe;1;Brintesia circe;0.99999905095796;  
GU676589;Lepidoptera;Lampides boeticus;Lampides boeticus;1;Lampides boeticus;0.99999999545906;  
GU676590;Lepidoptera;Anthocharis euphenoides;NA;0.073;Anthocharis euphenoides;0.954712885635666;  
GU676592;Lepidoptera;Glaucopsyche melanops;Glaucopsyche melanops;1;Glaucopsyche melanops;0.999952924254607;  
GU676593;Lepidoptera;Polyommatus celina;NA;0.029;Polyommatus celina;0.99999999960295;  
GU676595;Lepidoptera;Vanessa atalanta;Vanessa atalanta;1;Vanessa atalanta;0.999999999469395;  
GU676596;Lepidoptera;Colias crocea;NA;0.021;Colias crocea;0.749631165399089;  
GU676597;Lepidoptera;Glaucopsyche melanops;Glaucopsyche melanops;1;Glaucopsyche melanops;0.999981879020163;  
GU676600;Lepidoptera;Anthocharis euphenoides;Anthocharis euphenoides;0.008;Anthocharis euphenoides;0.985036987582027;  
GU676603;Lepidoptera;Coenonympha pamphilus;Coenonympha pamphilus;1;Coenonympha pamphilus;0.99999999999744;  
GU676604;Lepidoptera;Lycaena phlaeas;Lycaena phlaeas;1;Lycaena phlaeas;0.999999996363186;  
GU676605;Lepidoptera;Carcharodus alceae;Carcharodus alceae;0.999;Carcharodus alceae;0.999999996339511;  
GU676609;Lepidoptera;Pararge aegeria;Pararge aegeria;1;Pararge aegeria;0.999999999963165;  
GU676611;Lepidoptera;Polyommatus icarus;Polyommatus icarus;0.001;Polyommatus icarus;0.999851522482238;  
GU676613;Lepidoptera;Pieris napi;NA;0.028;Pieris napi;0.888205720664699;  
GU676615;Lepidoptera;Parnassius mnemosyne;Parnassius mnemosyne;1;Parnassius mnemosyne;0.999999269897625;  
GU676616;Lepidoptera;Parnassius mnemosyne;Parnassius mnemosyne;1;Parnassius mnemosyne;0.999999269897625;  
GU676617;Lepidoptera;Pyrgus malvoides;NA;0.076;Pyrgus malvoides;0.887854315566122;  
GU676621;Lepidoptera;Glaucopsyche alexis;Glaucopsyche alexis;0.001;Glaucopsyche alexis;0.994667256195263;  
GU676622;Lepidoptera;Cupido minimus;NA;0.001;Cupido minimus;0.999420080317202;  
GU676624;Lepidoptera;Anthocharis euphenoides;NA;NA;Anthocharis euphenoides;0.948387107617061;  
GU676627;Lepidoptera;Gonepteryx rhamni;Gonepteryx rhamni;1;Gonepteryx rhamni;0.999844409790237;  
GU676629;Lepidoptera;Celastrina argiolus;Celastrina argiolus;1;Celastrina argiolus;0.999527385150531;  
GU676630;Lepidoptera;Gonepteryx cleopatra;Gonepteryx cleopatra;0.998;Gonepteryx cleopatra;0.999118636582266;  
GU676632;Lepidoptera;Colias alfacariensis;Colias alfacariensis;0.001;Colias alfacariensis;0.999857790810452;  
GU676634;Lepidoptera;Carcharodus alceae;Carcharodus alceae;0.999;Carcharodus alceae;0.999999996339511;  
GU676638;Lepidoptera;Vanessa atalanta;Vanessa atalanta;1;Vanessa atalanta;0.999999999757762;  
GU676639;Lepidoptera;Maniola cecilia;Pyronia cecilia;1;Pyronia cecilia;1;  
GU676640;Lepidoptera;Callophrys rubi;NA;0.001;Callophrys rubi;0.99870518510598;  
GU676648;Lepidoptera;Lycaena tityrus;Lycaena tityrus;1;Lycaena tityrus;0.999997855580031;  
GU676649;Lepidoptera;Aporia crataegi;NA;NA;Aporia crataegi;0.999996781126733;  
GU676651;Lepidoptera;Maniola jurtina;NA;NA;Maniola jurtina;0.949518227999457;  
GU676654;Lepidoptera;Polyommatus icarus;Polyommatus icarus;0.001;Polyommatus icarus;0.999851522482238;  
GU676660;Lepidoptera;Coenonympha pamphilus;Coenonympha pamphilus;1;Coenonympha pamphilus;0.999999999999744;  
GU676663;Lepidoptera;Anthocharis cardamines;Anthocharis cardamines;1;Anthocharis cardamines;0.99999998453049;  
GU676666;Lepidoptera;Glaucopsyche melanops;Glaucopsyche melanops;1;Glaucopsyche melanops;0.999952924254607;  
GU676668;Lepidoptera;Glaucopsyche melanops;Glaucopsyche melanops;1;Glaucopsyche melanops;0.999977090845591;

GU676669;Lepidoptera;Lycaena phlaeas;Lycaena phlaeas;1;Lycaena phlaeas;0.999999996363186;  
GU676671;Lepidoptera;Vanessa atalanta;Vanessa atalanta;1;Vanessa atalanta;0.99999999757762;  
GU676674;Lepidoptera;Lasiommata megera;Lasiommata megera;1;Lasiommata megera;0.999951812067954;  
GU676675;Lepidoptera;Anthocharis cardamines;Anthocharis cardamines;1;Anthocharis  
cardamines;0.99999998453049;  
GU676676;Lepidoptera;Pararge aegeria;Pararge aegeria;1;Pararge aegeria;0.99999999963165;  
GU676679;Lepidoptera;Callophrys rubi;NA;0.001;Callophrys rubi;0.99870518510598;  
GU676680;Lepidoptera;Plebejus argus;Plebejus argus;1;Plebejus argus;0.995353400367624;  
GU676685;Lepidoptera;Aglaia urticae;NA;0.002;Aglaia urticae;0.987497593219019;  
GU676687;Lepidoptera;Lycaena phlaeas;Lycaena phlaeas;1;Lycaena phlaeas;0.999999996363186;  
GU676689;Lepidoptera;Anthocharis euphenoides;NA;0.172;Anthocharis euphenoides;0.943741664916385;  
GU676691;Lepidoptera;Colias alfacariensis;Colias alfacariensis;0.001;Colias  
alfacariensis;0.999857790810452;  
GU676693;Lepidoptera;Anthocharis cardamines;Anthocharis cardamines;1;Anthocharis  
cardamines;0.99999998453049;  
GU676694;Lepidoptera;Pyrgus onopordi;Pyrgus onopordi;1;Pyrgus onopordi;0.999998134499953;  
GU676700;Lepidoptera;Pyrgus onopordi;Pyrgus onopordi;1;Pyrgus onopordi;0.99999711229755;  
GU676701;Lepidoptera;Gonepteryx cleopatra;Gonepteryx cleopatra;0.998;Gonepteryx  
cleopatra;0.999118636582266;  
GU676702;Lepidoptera;Gonepteryx cleopatra;Gonepteryx cleopatra;0.998;Gonepteryx  
cleopatra;0.999118636582266;  
GU676703;Lepidoptera;Carcharodus alceae;Carcharodus alceae;0.999;Carcharodus  
alceae;0.999999996339511;  
GU676710;Lepidoptera;Pararge aegeria;Pararge aegeria;1;Pararge aegeria;0.999999999365514;  
GU676712;Lepidoptera;Celastrina argiolus;Celastrina argiolus;1;Celastrina  
argiolus;0.999527385150531;  
GU676713;Lepidoptera;Colias alfacariensis;Colias alfacariensis;0.001;Colias  
alfacariensis;0.999857790810452;  
GU676714;Lepidoptera;Maniola jurtina;NA;0.001;Maniola jurtina;0.939220105860875;  
GU676716;Lepidoptera;Colias crocea;NA;0.059;NA;0.99999999999738;  
GU676717;Lepidoptera;Lycaena phlaeas;Lycaena phlaeas;1;Lycaena phlaeas;0.999999996363186;  
GU676720;Lepidoptera;Maniola cecilia;Pyronia cecilia;1;Pyronia cecilia;1;  
GU676721;Lepidoptera;Polyommatus celina;Polyommatus celina;0.001;Polyommatus  
celina;0.99999999499352;  
GU676723;Lepidoptera;Melitaea deione;Melitaea deione;1;Melitaea deione;0.99999999627732;  
GU676724;Lepidoptera;Vanessa cardui;Vanessa cardui;1;Vanessa cardui;0.999999459983318;  
GU676725;Lepidoptera;Gonepteryx cleopatra;Gonepteryx cleopatra;0.998;Gonepteryx  
cleopatra;0.999118636582266;  
GU676726;Lepidoptera;Polyommatus celina;Polyommatus celina;0.001;Polyommatus  
celina;0.99999999717033;  
GU676727;Lepidoptera;Lycaena phlaeas;Lycaena phlaeas;1;Lycaena phlaeas;0.999999996363186;  
GU676729;Lepidoptera;Celastrina argiolus;Celastrina argiolus;1;Celastrina  
argiolus;0.999527385150531;  
GU676730;Lepidoptera;Gonepteryx cleopatra;Gonepteryx cleopatra;0.998;Gonepteryx  
cleopatra;0.999118636582266;  
GU676731;Lepidoptera;Coenonympha pamphilus;Coenonympha pamphilus;1;Coenonympha  
pamphilus;0.99999999995282;  
GU676732;Lepidoptera;Coenonympha pamphilus;Coenonympha pamphilus;1;Coenonympha  
pamphilus;0.99999999995424;  
GU676733;Lepidoptera;Vanessa cardui;Vanessa cardui;1;Vanessa cardui;0.999999803450484;  
GU676734;Lepidoptera;Colias crocea;NA;0.059;NA;0.99999999999738;  
GU676735;Lepidoptera;Vanessa atalanta;Vanessa atalanta;1;Vanessa atalanta;0.99999999757762;  
GU676738;Lepidoptera;Pararge aegeria;Pararge aegeria;1;Pararge aegeria;0.99999999365514;  
GU676740;Lepidoptera;Scolitantides orion;Scolitantides orion;1;Scolitantides  
orion;0.99999953757596;  
GU676741;Lepidoptera;Melitaea parthenoides;Melitaea parthenoides;1;Melitaea  
parthenoides;0.99999426287269;  
GU676742;Lepidoptera;Vanessa atalanta;Vanessa atalanta;1;Vanessa atalanta;0.99999999757762;  
GU676743;Lepidoptera;Pyrgus cacaliae;Pyrgus cacaliae;0.999;Pyrgus cacaliae;0.997229839348598;  
GU676744;Lepidoptera;Thymelicus sylvestris;Thymelicus sylvestris;1;Thymelicus  
sylvestris;0.99999985935205;  
GU676747;Lepidoptera;Chazara briseis;Chazara briseis;1;Chazara briseis;0.999980393060755;  
GU676752;Lepidoptera;Polyommatus damon;Polyommatus damon;1;Polyommatus damon;0.999999502567344;  
GU676754;Lepidoptera;Limenitis camilla;Limenitis camilla;0.009;Limenitis  
camilla;0.9999828626808;  
GU676755;Lepidoptera;Apatura ilia;NA;0.165;Apatura ilia;0.956796812031481;  
GU676757;Lepidoptera;Carcharodus alceae;Carcharodus alceae;0.999;Carcharodus  
alceae;0.999999996339511;  
GU676758;Lepidoptera;Polyommatus eros;NA;0.003;Polyommatus eros;0.985402505884526;  
GU676759;Lepidoptera;Polyommatus eros;NA;0.003;Polyommatus eros;0.985402505884526;  
GU676762;Lepidoptera;Pyrgus carthami;Pyrgus carthami;1;Pyrgus carthami;0.999997353719783;  
GU676764;Lepidoptera;Colias phicomone;Colias phicomone;0.001;Colias phicomone;0.986802434025645;  
GU676765;Lepidoptera;Colias phicomone;Colias phicomone;0.001;Colias phicomone;0.986802434025645;  
GU676766;Lepidoptera;Cyaniris semiargus;Cyaniris semiargus;0.001;Cyaniris  
semiargus;0.998806431837647;  
GU676767;Lepidoptera;Polyommatus icarus;NA;0.004;Polyommatus icarus;0.999481683747521;  
GU676768;Lepidoptera;Polyommatus icarus;NA;NA;Polyommatus icarus;0.984400584728957;  
GU676772;Lepidoptera;Polyommatus celina;NA;0.072;Polyommatus celina;0.99999999953559;

GU676778;Lepidoptera;Carcharodus baeticus;Carcharodus baeticus;1;Carcharodus  
 baeticus;0.999983899664537;  
 GU676779;Lepidoptera;Pyrgus malvoides;NA;0.211;Pyrgus malvoides;0.811806911877104;  
 GU676781;Lepidoptera;Satyrium acaciae;Satyrium acaciae;1;Satyrium acaciae;0.9999991343697;  
 GU676786;Lepidoptera;Cupido osiris;Cupido osiris;1;Cupido osiris;0.999999791352473;  
 GU676791;Lepidoptera;Anthocharis euphenoides;NA;0.131;Anthocharis euphenoides;0.934740202775498;  
 GU676794;Lepidoptera;Colias alfacariensis;Colias alfacariensis;0.001;Colias  
 alfacariensis;0.999857790810452;  
 GU676796;Lepidoptera;Carcharodus baeticus;Carcharodus baeticus;1;Carcharodus  
 baeticus;0.999956286218202;  
 GU676797;Lepidoptera;Polyommatus icarus;Polyommatus icarus;0.001;Polyommatus  
 icarus;0.999851522482238;  
 GU676800;Lepidoptera;Carcharodus alceae;Carcharodus alceae;0.001;Carcharodus  
 alceae;0.99999970193983;  
 GU676801;Lepidoptera;Satyrium spini;Satyrium spini;1;Satyrium spini;0.999998173309697;  
 GU676803;Lepidoptera;Melitaea deione;Melitaea deione;1;Melitaea deione;0.99999996865029;  
 GU676806;Lepidoptera;Carcharodus alceae;Carcharodus alceae;0.999;Carcharodus  
 alceae;0.99999996339511;  
 GU676809;Lepidoptera;Thymelicus sylvestris;Thymelicus sylvestris;1;Thymelicus  
 sylvestris;0.99999985935205;  
 GU676810;Lepidoptera;Gegenes nostrodamus;Gegenes nostrodamus;1;Gegenes  
 nostrodamus;0.99999996883645;  
 GU676812;Lepidoptera;Gegenes nostrodamus;Gegenes nostrodamus;1;Gegenes  
 nostrodamus;0.99999996883645;  
 GU676813;Lepidoptera;Gegenes nostrodamus;Gegenes nostrodamus;1;Gegenes  
 nostrodamus;0.999999887376482;  
 GU676814;Lepidoptera;Pyrgus malvoides;NA;0.076;Pyrgus malvoides;0.887854315566122;  
 GU676815;Lepidoptera;Thymelicus acteon;Thymelicus acteon;1;Thymelicus acteon;0.9999999752248;  
 GU676816;Lepidoptera;Pyrgus malvoides;NA;0.076;Pyrgus malvoides;0.887854315566122;  
 GU676817;Lepidoptera;Pyrgus carthami;Pyrgus carthami;1;Pyrgus carthami;0.999997085657879;  
 GU676819;Lepidoptera;Pyrgus serratulae;Pyrgus serratulae;1;Pyrgus serratulae;0.99999877361184;  
 GU676820;Lepidoptera;Carcharodus lavatherae;Carcharodus lavatherae;1;Carcharodus  
 lavatherae;0.999975293871709;  
 GU676821;Lepidoptera;Pyrgus serratulae;Pyrgus serratulae;1;Pyrgus serratulae;0.9999949307896;  
 GU676824;Lepidoptera;Ochlodes sylvanus;NA;0.316;Ochlodes sylvanus;0.996318754838625;  
 GU676825;Lepidoptera;Lysandra coridon;NA;NA;NA;0.999974015575741;  
 GU676826;Lepidoptera;Lysandra coridon;NA;NA;NA;0.999936262862373;  
 GU676827;Lepidoptera;Carcharodus alceae;Carcharodus alceae;0.999;Carcharodus  
 alceae;0.99999996339511;  
 GU676828;Lepidoptera;Gegenes nostrodamus;Gegenes nostrodamus;1;Gegenes  
 nostrodamus;0.99999996883645;  
 GU676829;Lepidoptera;Melitaea deione;Melitaea deione;1;Melitaea deione;0.999999832903242;  
 GU676830;Lepidoptera;Pyrgus onopordi;Pyrgus onopordi;1;Pyrgus onopordi;0.999997111229755;  
 GU676831;Lepidoptera;Lysandra coridon;NA;NA;NA;0.999974015575741;  
 GU676832;Lepidoptera;Lysandra coridon;NA;NA;NA;0.999974015575741;  
 GU676833;Lepidoptera;Lampides boeticus;Lampides boeticus;1;Lampides boeticus;0.99999999281187;  
 GU676834;Lepidoptera;Aglais urticae;Aglais urticae;0.004;Aglais urticae;0.995016750255472;  
 GU676838;Lepidoptera;Glaucopsyche melanops;Glaucopsyche melanops;1;Glaucopsyche  
 melanops;0.999953769170809;  
 GU676840;Lepidoptera;Aglais urticae;Aglais urticae;0.001;Aglais urticae;0.986884738893991;  
 GU676841;Lepidoptera;Thymelicus acteon;Thymelicus acteon;1;Thymelicus acteon;0.9999999752248;  
 GU676843;Lepidoptera;Anthocharis euphenoides;NA;0.172;Anthocharis euphenoides;0.943741664916385;  
 GU676844;Lepidoptera;Celastrina argiolus;Celastrina argiolus;1;Celastrina  
 argiolus;0.999527385150531;  
 GU676845;Lepidoptera;Lasiommata megera;Lasiommata megera;1;Lasiommata megera;0.999928528239676;  
 GU676846;Lepidoptera;Glaucopsyche melanops;Glaucopsyche melanops;1;Glaucopsyche  
 melanops;0.999953769170809;  
 GU676847;Lepidoptera;Lycaena phlaeas;Lycaena phlaeas;1;Lycaena phlaeas;0.999999996363186;  
 GU676849;Lepidoptera;Melitaea deione;Melitaea deione;1;Melitaea deione;0.99999998728185;  
 GU676853;Lepidoptera;Charaxes jasius;Charaxes jasius;0.001;Charaxes jasius;0.997689374666591;  
 GU676869;Lepidoptera;Aporia crataegi;NA;NA;Aporia crataegi;0.999996445569743;  
 GU676870;Lepidoptera;Gonepteryx rhamni;NA;0.122;Gonepteryx rhamni;0.999344210758396;  
 GU676871;Lepidoptera;Hipparchia semele;NA;0.001;Hipparchia semele;0.792351581988454;  
 GU676872;Lepidoptera;Brintesia circe;Brintesia circe;1;Brintesia circe;0.99999922895629;  
 GU676873;Lepidoptera;Arethusana arethusa;NA;0.062;Arethusana arethusa;0.999946829736877;  
 GU676874;Lepidoptera;Fabriciana adippe;Fabriciana adippe;0.001;Fabriciana  
 adippe;0.99939671801438;  
 GU676875;Lepidoptera;Maniola tithonus;Pyronia tithonus;NA;Pyronia tithonus;1;  
 GU676876;Lepidoptera;Brenthis ino;Brenthis ino;0.998;Brenthis ino;0.995325118916732;  
 GU676878;Lepidoptera;Melitaea nevadensis;Melitaea celadussa;1;Melitaea  
 celadussa;0.996871309289245;  
 GU676881;Lepidoptera;Euphydryas aurinia;Euphydryas aurinia;0.016;Euphydryas  
 aurinia;0.997751503369639;  
 GU676884;Lepidoptera;Coenonympha arcania;NA;0.172;Coenonympha arcania;0.963036309473038;  
 GU676885;Lepidoptera;Lampides boeticus;Lampides boeticus;1;Lampides boeticus;0.99999999469992;  
 GU676886;Lepidoptera;Euphydryas aurinia;Euphydryas aurinia;0.021;Euphydryas  
 aurinia;0.996482336387469;  
 GU676888;Lepidoptera;Pieris napi;NA;0.028;Pieris napi;0.888205720664699;

GU676889;Lepidoptera;Pieris napi;NA;0.028;Pieris napi;0.888205720664699;  
GU676891;Lepidoptera;Celastrina argiolus;Celastrina argiolus;1;Celastrina  
argiolus;0.999527385150531;  
GU676892;Lepidoptera;Colias crocea;NA;0.059;NA;0.99999999999738;  
GU676893;Lepidoptera;Colias crocea;NA;0.059;NA;0.99999999999738;  
GU676895;Lepidoptera;Vanessa atalanta;Vanessa atalanta;1;Vanessa atalanta;0.999999999757762;  
GU676896;Lepidoptera;Melitaea trivia;Melitaea trivia;1;Melitaea trivia;0.99999999977604;  
GU676897;Lepidoptera;Anthocharis cardamines;Anthocharis cardamines;1;Anthocharis  
cardamines;0.999999940675226;  
GU676899;Lepidoptera;Melitaea nevadensis;Melitaea celadussa;1;Melitaea  
celadussa;0.996871309289245;  
GU676901;Lepidoptera;Cyaniris semiargus;NA;NA;Cyaniris semiargus;0.999051841766953;  
GU676902;Lepidoptera;Lasionommata megera;Lasionommata megera;1;Lasionommata megera;0.999928528239676;  
GU676904;Lepidoptera;Melitaea cinxia;Melitaea cinxia;1;Melitaea cinxia;0.99999999999659;  
GU676905;Lepidoptera;Aporia crataegi;NA;0.007;Aporia crataegi;0.999997331828531;  
GU676906;Lepidoptera;Satyrus actaea;Satyrus actaea;1;Satyrus actaea;0.998655924692805;  
GU676908;Lepidoptera;Hipparchia hermione;Hipparchia hermione;1;Hipparchia  
hermione;0.999929600232128;  
GU676909;Lepidoptera;Satyrus actaea;Satyrus actaea;1;Satyrus actaea;0.998400754517542;  
GU676910;Lepidoptera;Lysandra coridon;NA;NA;NA;0.999938937260851;  
GU676911;Lepidoptera;Coenonympha arcania;NA;0.172;Coenonympha arcania;0.963036309473038;  
GU676913;Lepidoptera;Maniola tithonus;Pyronia tithonus;1;Pyronia tithonus;1;  
GU676915;Lepidoptera;Vanessa cardui;Vanessa cardui;1;Vanessa cardui;0.99999459983318;  
GU676919;Lepidoptera;Polyommatus celina;Polyommatus celina;0.021;Polyommatus  
celina;0.99999999963336;  
GU676924;Lepidoptera;Satyrium esculi;Satyrium esculi;1;Satyrium esculi;0.999999957367948;  
GU676928;Lepidoptera;Cupido argiades;NA;0.187;Cupido argiades;0.750699947178303;  
GU676929;Lepidoptera;Cupido osiris;Cupido osiris;1;Cupido osiris;0.999999908943356;  
GU676930;Lepidoptera;Fabriciana niobe;NA;0.035;Fabriciana niobe;0.949480222958778;  
GU676932;Lepidoptera;Melitaea cinxia;Melitaea cinxia;1;Melitaea cinxia;0.99999999999517;  
GU676933;Lepidoptera;Phengaris arion;NA;0.054;Phengaris arion;0.938397095316026;  
GU676936;Lepidoptera;Cupido osiris;Cupido osiris;1;Cupido osiris;0.999999170120762;  
GU676938;Lepidoptera;Cupido minimus;NA;0.009;Cupido minimus;0.999791453712643;  
GU676940;Lepidoptera;Erynnis tages;Erynnis tages;1;Erynnis tages;0.999999281987018;  
GU676941;Lepidoptera;Carcharodus alceae;Carcharodus alceae;0.001;Carcharodus  
alceae;0.999999970193983;  
GU676942;Lepidoptera;Cupido osiris;Cupido osiris;1;Cupido osiris;0.999999791352473;  
GU676943;Lepidoptera;Melitaea didyma;Melitaea didyma;NA;Melitaea didyma;0.97469276593809;  
GU676945;Lepidoptera;Coenonympha pamphilus;Coenonympha pamphilus;1;Coenonympha  
pamphilus;0.99999999999744;  
GU676946;Lepidoptera;Carcharodus alceae;Carcharodus alceae;0.999;Carcharodus  
alceae;0.99999996339511;  
GU676947;Lepidoptera;Ochlodes sylvanus;NA;0.316;Ochlodes sylvanus;0.996318754838625;  
GU676948;Lepidoptera;Cercyonis lupina;Hyponphele lupina;1;Hyponphele lupina;0.99999992730324;  
GU676950;Lepidoptera;Hipparchia hermione;Hipparchia hermione;1;Hipparchia  
hermione;0.999921864017579;  
GU676951;Lepidoptera;Satyrus actaea;Satyrus actaea;0.999;Satyrus actaea;0.998319392230218;  
GU676952;Lepidoptera;Lysandra hispana;Lysandra hispana;NA;Lysandra hispana;0.788541986725807;  
GU676954;Lepidoptera;Coenonympha dorus;Coenonympha dorus;1;Coenonympha dorus;0.99999999757307;  
GU676956;Lepidoptera;Brenthis daphne;NA;0.151;NA;0.99999999489116;  
GU676958;Lepidoptera;Ochlodes sylvanus;NA;0.316;Ochlodes sylvanus;0.996318754838625;  
GU676959;Lepidoptera;Thymelicus acteon;Thymelicus acteon;1;Thymelicus acteon;0.9999999752248;  
GU676961;Lepidoptera;Ochlodes sylvanus;NA;0.316;Ochlodes sylvanus;0.996318754838625;  
GU676962;Lepidoptera;Pyrgus serratulae;Pyrgus serratulae;1;Pyrgus serratulae;0.99999694697398;  
GU676964;Lepidoptera;Polyommatus eros;Polyommatus eros;0.001;Polyommatus eros;0.986004783752008;  
GU676965;Lepidoptera;Cyaniris semiargus;NA;NA;Cyaniris semiargus;0.999097907036339;  
GU676966;Lepidoptera;Boloria euphrosyne;Boloria euphrosyne;0.002;Boloria  
euphrosyne;0.999970544424708;  
GU676967;Lepidoptera;Polyommatus eros;NA;0.003;Polyommatus eros;0.985402505884526;  
GU676969;Lepidoptera;Polyommatus amandus;Polyommatus amandus;0.003;Polyommatus  
amandus;0.999980071833264;  
GU676970;Lepidoptera;Lysandra hispana;NA;NA;NA;0.999905175238227;  
GU676971;Lepidoptera;Pyrgus carthami;Pyrgus carthami;1;Pyrgus carthami;0.999981615717954;  
GU676972;Lepidoptera;Satyrus ferula;Satyrus ferula;0.001;Satyrus ferula;0.994329228962786;  
GU676973;Lepidoptera;Coenonympha glycerion;NA;0.28;Coenonympha glycerion;0.99998036263913;  
GU676974;Lepidoptera;Pontia callidice;Pontia callidice;1;Pontia callidice;0.99999998637406;  
GU676975;Lepidoptera;Satyrus ferula;Satyrus ferula;0.001;Satyrus ferula;0.994329228962786;  
GU676977;Lepidoptera;Agriades glandon;NA;0.002;Agriades glandon;0.987149722429845;  
GU676980;Lepidoptera;Ochlodes sylvanus;NA;0.316;Ochlodes sylvanus;0.996318754838625;  
GU676981;Lepidoptera;Pyrgus malvoides;NA;0.076;Pyrgus malvoides;0.887854315566122;  
GU676982;Lepidoptera;Thymelicus lineola;Thymelicus lineola;1;Thymelicus  
lineola;0.99999292515094;  
GU676985;Lepidoptera;Thymelicus lineola;Thymelicus lineola;1;Thymelicus  
lineola;0.99997636840483;  
GU676986;Lepidoptera;Pyrgus carthami;Pyrgus carthami;1;Pyrgus carthami;0.999997085657879;  
GU676987;Lepidoptera;Thymelicus lineola;Thymelicus lineola;1;Thymelicus  
lineola;0.99998106572607;  
GU676989;Lepidoptera;Pyrgus onopordi;Pyrgus onopordi;1;Pyrgus onopordi;0.99999711229755;

GU676992;Lepidoptera;Carcharodus alceae;Carcharodus alceae;0.999;Carcharodus alceae;0.99999996339511;  
GU676993;Lepidoptera;Erynnis tages;Erynnis tages;1;Erynnis tages;0.999999281987018;  
GU676994;Lepidoptera;Carterocephalus palaemon;NA;0.052;Carterocephalus palaemon;0.728445051795325;  
GU676995;Lepidoptera;Carterocephalus palaemon;NA;0.052;Carterocephalus palaemon;0.728445051795325;  
GU676997;Lepidoptera;Carterocephalus palaemon;NA;0.052;Carterocephalus palaemon;0.728445051795325;  
GU677003;Lepidoptera;Coenonympha dorus;Coenonympha dorus;1;Coenonympha dorus;0.99999999269562;  
GU677004;Lepidoptera;Pyrgus malvoides;NA;0.076;Pyrgus malvoides;0.887854315566122;  
GU677006;Lepidoptera;Pyrgus onopordi;Pyrgus onopordi;1;Pyrgus onopordi;0.999997111229755;  
GU677010;Lepidoptera;Lysandra hispana;Lysandra hispana;NA;NA;0.999950101635271;  
GU677011;Lepidoptera;Lysandra hispana;NA;NA;NA;0.999986194928665;  
GU677014;Lepidoptera;Coenonympha dorus;Coenonympha dorus;1;Coenonympha dorus;0.9999999988259;  
GU677022;Lepidoptera;Polyommatus escheri;Polyommatus escheri;1;Polyommatus escheri;0.99999972395529;  
GU677023;Lepidoptera;Helleia helle;Lycaena helle;1;Lycaena helle;0.99999987876606;  
GU677024;Lepidoptera;Lysandra coridon;Lysandra coridon;NA;Lysandra coridon;0.892412957467058;  
GU677027;Lepidoptera;Lysandra coridon;Lysandra coridon;NA;Lysandra coridon;0.835615654600914;  
GU677028;Lepidoptera;Satyrus actaea;Satyrus actaea;1;Satyrus actaea;0.998519952537604;  
GU677030;Lepidoptera;Aglais urticae;NA;0.002;Aglais urticae;0.987497593219019;  
GU677032;Lepidoptera;Erebia neoridas;NA;NA;Erebia neoridas;0.996118011663822;  
GU677034;Lepidoptera;Erebia neoridas;NA;NA;Erebia neoridas;0.997866159969085;  
GU677035;Lepidoptera;Cupido alcetas;NA;0.068;Cupido alcetas;0.88988907876118;  
GU677037;Lepidoptera;Melitaea trivia;Melitaea trivia;1;Melitaea trivia;0.99999999977604;  
GU677039;Lepidoptera;Cupido minimus;Cupido minimus;0.001;Cupido minimus;0.99926360783759;  
GU677040;Lepidoptera;Melitaea trivia;Melitaea trivia;1;Melitaea trivia;0.99999999977604;  
GU677042;Lepidoptera;Polyommatus damon;Polyommatus damon;1;Polyommatus damon;0.99999571555669;  
GU677047;Lepidoptera;Chazara briseis;Chazara briseis;1;Chazara briseis;0.999982519182705;  
GU677048;Lepidoptera;Euphydryas aurinia;Euphydryas aurinia;0.016;Euphydryas aurinia;0.997751503369639;  
GU677051;Lepidoptera;Lasiommata megera;Lasiommata megera;1;Lasiommata megera;0.999928528239676;  
GU677052;Lepidoptera;Celastrina argiolus;Celastrina argiolus;1;Celastrina argiolus;0.999527385150531;  
GU686843;Lepidoptera;Thymelicus lineola;Thymelicus lineola;1;Thymelicus lineola;0.999971535093703;  
GU686862;Lepidoptera;Cupido minimus;NA;0.006;Cupido minimus;0.999768371759258;  
GU686877;Lepidoptera;Celastrina argiolus;Celastrina argiolus;1;Celastrina argiolus;0.999708846309046;  
GU686947;Lepidoptera;Erebia pronoe;Erebia pronoe;1;Erebia pronoe;0.999733321385675;  
GU686972;Lepidoptera;Pyrgus andromedae;Pyrgus andromedae;0.001;Pyrgus andromedae;0.998828669843251;  
GU686973;Lepidoptera;Boloria euphrosyne;Boloria euphrosyne;0.002;Boloria euphrosyne;0.999982756586458;  
GU686974;Lepidoptera;Erebia pandrose;Erebia pandrose;0.013;Erebia pandrose;0.974388092470716;  
GU686979;Lepidoptera;Aricia agestis;NA;0.253;Aricia agestis;0.996350017387504;  
GU686980;Lepidoptera;Aricia agestis;NA;0.253;Aricia agestis;0.996350017387504;  
GU686981;Lepidoptera;Aricia agestis;NA;0.253;Aricia agestis;0.996350017387504;  
GU686982;Lepidoptera;Aricia agestis;NA;NA;Aricia agestis;0.99525963650756;  
GU686983;Lepidoptera;Aricia agestis;NA;0.253;Aricia agestis;0.996350017387504;  
GU686984;Lepidoptera;Aricia agestis;NA;0.253;Aricia agestis;0.996350017387504;  
GU686985;Lepidoptera;Aricia agestis;NA;0.253;Aricia agestis;0.996350017387504;  
GU686986;Lepidoptera;Aricia agestis;NA;0.253;Aricia agestis;0.996350017387504;  
GU686988;Lepidoptera;Aricia agestis;NA;0.253;Aricia agestis;0.996350017387504;  
GU686990;Lepidoptera;Aricia agestis;NA;0.253;Aricia agestis;0.996350017387504;  
GU686991;Lepidoptera;Pyrgus carthami;Pyrgus carthami;1;Pyrgus carthami;0.99998997209607;  
GU686992;Lepidoptera;Aricia agestis;NA;0.253;Aricia agestis;0.996350017387504;  
GU686993;Lepidoptera;Pyrgus armoricanus;Pyrgus armoricanus;1;Pyrgus armoricanus;0.999997353848817;  
GU686994;Lepidoptera;Aricia agestis;NA;0.253;Aricia agestis;0.996350017387504;  
GU686995;Lepidoptera;Aricia agestis;NA;0.253;Aricia agestis;0.996350017387504;  
GU686997;Lepidoptera;Aricia agestis;NA;0.253;Aricia agestis;0.996350017387504;  
GU686998;Lepidoptera;Aricia agestis;NA;0.253;Aricia agestis;0.996350017387504;  
GU686999;Lepidoptera;Pyrgus alveus;NA;NA;Pyrgus alveus;0.941697735568124;  
GU687000;Lepidoptera;Aricia agestis;NA;0.161;Aricia agestis;0.995266819041939;  
GU687001;Lepidoptera;Pyrgus alveus;NA;NA;Pyrgus alveus;0.941697735568124;  
GU687002;Lepidoptera;Pyrgus armoricanus;Pyrgus armoricanus;1;Pyrgus armoricanus;0.999997353848817;  
GU687003;Lepidoptera;Aricia agestis;NA;0.253;Aricia agestis;0.996350017387504;  
GU687004;Lepidoptera;Pyrgus alveus;NA;NA;Pyrgus alveus;0.941697735568124;  
GU687005;Lepidoptera;Aricia agestis;NA;0.253;Aricia agestis;0.996350017387504;  
GU687006;Lepidoptera;Pyrgus alveus;NA;NA;Pyrgus alveus;0.941697735568124;  
GU687007;Lepidoptera;Aricia agestis;NA;0.253;Aricia agestis;0.996350017387504;  
GU687008;Lepidoptera;Aricia agestis;NA;0.253;Aricia agestis;0.996350017387504;  
GU687009;Lepidoptera;Aricia agestis;NA;0.253;Aricia agestis;0.996350017387504;  
GU687010;Lepidoptera;Pyrgus alveus;NA;NA;Pyrgus alveus;0.941697735568124;  
GU687011;Lepidoptera;Aricia agestis;NA;0.161;Aricia agestis;0.995266819041939;

GU687012;Lepidoptera;Pyrgus alveus;NA;NA;Pyrgus alveus;0.962152887824497;  
 GU687013;Lepidoptera;Pyrgus alveus;NA;NA;Pyrgus alveus;0.941697735568124;  
 GU687014;Lepidoptera;Pyrgus alveus;NA;NA;Pyrgus alveus;0.827119616974978;  
 GU687015;Lepidoptera;Pyrgus alveus;NA;NA;Pyrgus alveus;0.941697735568124;  
 GU687016;Lepidoptera;Aricia agestis;NA;0.253;Aricia agestis;0.996350017387504;  
 GU687017;Lepidoptera;Pyrgus alveus;NA;NA;Pyrgus alveus;0.941697735568124;  
 GU687018;Lepidoptera;Pyrgus alveus;NA;NA;Pyrgus alveus;0.941697735568124;  
 GU687019;Lepidoptera;Pyrgus alveus;NA;NA;Pyrgus alveus;0.941697735568124;  
 GU687020;Lepidoptera;Aricia agestis;NA;0.253;Aricia agestis;0.996350017387504;  
 GU687021;Lepidoptera;Pyrgus alveus;NA;NA;Pyrgus alveus;0.918895626779646;  
 GU687022;Lepidoptera;Aricia agestis;NA;0.253;Aricia agestis;0.996350017387504;  
 GU687023;Lepidoptera;Pyrgus alveus;NA;NA;Pyrgus alveus;0.827119616974978;  
 GU687024;Lepidoptera;Aricia agestis;NA;0.253;Aricia agestis;0.996350017387504;  
 GU687025;Lepidoptera;Pyrgus alveus;NA;0.205;Pyrgus alveus;0.796584470642115;  
 GU687026;Lepidoptera;Aricia agestis;NA;0.253;Aricia agestis;0.996350017387504;  
 GU687027;Lepidoptera;Pyrgus alveus;NA;NA;Pyrgus alveus;0.827119616974978;  
 GU687028;Lepidoptera;Aricia agestis;NA;0.253;Aricia agestis;0.996350017387504;  
 GU687029;Lepidoptera;Pyrgus alveus;NA;NA;Pyrgus alveus;0.827119616974978;  
 GU687030;Lepidoptera;Aricia agestis;NA;0.253;Aricia agestis;0.996350017387504;  
 GU687031;Lepidoptera;Pyrgus alveus;NA;NA;Pyrgus alveus;0.827119616974978;  
 GU687032;Lepidoptera;Aricia agestis;NA;0.253;Aricia agestis;0.996350017387504;  
 GU687033;Lepidoptera;Pyrgus alveus;NA;NA;Pyrgus alveus;0.827119616974978;  
 GU687034;Lepidoptera;Aricia agestis;NA;0.231;Aricia agestis;0.992802054683313;  
 GU687035;Lepidoptera;Pyrgus alveus;NA;NA;Pyrgus alveus;0.827119616974978;  
 GU687036;Lepidoptera;Aricia artaxerxes;Plebejus argus;1;Aricia artaxerxes;0.999743187199922;  
 GU687037;Lepidoptera;Pyrgus alveus;NA;NA;Pyrgus alveus;0.827119616974978;  
 GU687038;Lepidoptera;Aricia artaxerxes;Plebejus argus;1;Aricia artaxerxes;0.999743187199922;  
 GU687039;Lepidoptera;Aricia agestis;NA;0.253;Aricia agestis;0.996350017387504;  
 GU687040;Lepidoptera;Pyrgus alveus;NA;NA;Pyrgus alveus;0.827119616974978;  
 GU687041;Lepidoptera;Pyrgus alveus;NA;NA;Pyrgus alveus;0.827119616974978;  
 GU687042;Lepidoptera;Aricia artaxerxes;Plebejus argus;1;Aricia artaxerxes;0.999743187199922;  
 GU687043;Lepidoptera;Aricia agestis;NA;0.083;Aricia agestis;0.999021338679561;  
 GU687044;Lepidoptera;Aricia agestis;NA;NA;Aricia agestis;0.996930365249266;  
 GU687045;Lepidoptera;Pyrgus warrenensis;NA;0.106;NA;0.999999999994992;  
 GU687046;Lepidoptera;Pyrgus warrenensis;NA;0.003;NA;0.999999999997732;  
 GU687047;Lepidoptera;Aricia agestis;NA;0.083;Aricia agestis;0.999021338679561;  
 GU687048;Lepidoptera;Pyrgus warrenensis;NA;0.003;NA;0.999999999997732;  
 GU688437;Lepidoptera;Callophrys rubi;NA;0.003;Callophrys rubi;0.997328639918919;  
 GU688440;Lepidoptera;Callophrys rubi;NA;0.003;Callophrys rubi;0.996753822785804;  
 GU688441;Lepidoptera;Cupido minimus;NA;0.006;Cupido minimus;0.999768371759258;  
 GU688442;Lepidoptera;Satyrium spini;Satyrium spini;1;Satyrium spini;0.999999835426407;  
 GU688445;Lepidoptera;Plebejus argus;NA;0.328;Plebejus argus;0.969789734199889;  
 GU688446;Lepidoptera;Plebejus idas;NA;0.007;NA;0.999546324331549;  
 GU688448;Lepidoptera;Cyranis semiargus;NA;NA;Cyranis semiargus;0.999077874641703;  
 GU688451;Lepidoptera;Polyommatus daphnis;Polyommatus daphnis;0.008;Polyommatus daphnis;0.99732138840566;  
 GU688452;Lepidoptera;Polyommatus dorylas;Polyommatus dorylas;0.022;Polyommatus dorylas;0.975812216500382;  
 GU688454;Lepidoptera;Lysandra coridon;NA;NA;NA;0.998070184737648;  
 GU688455;Lepidoptera;Agriades optilete;Agriades optilete;1;Agriades optilete;0.999999991917434;  
 GU688457;Lepidoptera;Celastrina argiolus;Celastrina argiolus;1;Celastrina argiolus;0.999607797738003;  
 GU688458;Lepidoptera;Thecla betulae;Thecla betulae;1;Thecla betulae;0.99999999923688;  
 GU688459;Lepidoptera;Lycaena tityrus;Lycaena tityrus;1;Lycaena tityrus;0.99999147518929;  
 GU688460;Lepidoptera;Lycaena virgaureae;NA;0.209;Lycaena virgaureae;0.999669745100572;  
 GU688463;Lepidoptera;Helleia helle;Lycaena helle;1;Lycaena helle;0.99999986154194;  
 GU688465;Lepidoptera;Lycaena phlaeas;Lycaena phlaeas;1;Lycaena phlaeas;0.99999996363186;  
 GU688466;Lepidoptera;Helleia helle;Lycaena helle;1;Lycaena helle;0.99999986154194;  
 GU688468;Lepidoptera;Fabriciana niobe;NA;0.005;Fabriciana niobe;0.992125835358755;  
 GU688470;Lepidoptera;Argynnis aglaja;NA;0.001;NA;0.99999999999586;  
 GU688471;Lepidoptera;Fabriciana adippe;Fabriciana adippe;0.028;Fabriciana adippe;0.969769198942097;  
 GU688473;Lepidoptera;Boloria thore;Boloria thore;1;Boloria thore;0.99999998359726;  
 GU688476;Lepidoptera;Anthocharis cardamines;Anthocharis cardamines;1;Anthocharis cardamines;0.999999361582729;  
 GU688503;Lepidoptera;Pieris napi;NA;0.013;Pieris napi;0.946576653115347;  
 GU688507;Lepidoptera;Colias crocea;NA;0.059;NA;0.99999999999738;  
 GU688508;Lepidoptera;Aporia crataegi;Aporia crataegi;1;Aporia crataegi;0.99998459680561;  
 GU688510;Lepidoptera;Colias palaeno;NA;0.001;NA;0.999999999982869;  
 GU688531;Lepidoptera;Aricia agestis;NA;0.253;Aricia agestis;0.996350017387504;  
 GU688532;Lepidoptera;Plebejus idas;NA;0.007;NA;0.999546324331549;  
 GU688536;Lepidoptera;Pararge aegeria;Pararge aegeria;1;Pararge aegeria;0.99999999963165;  
 GU688538;Lepidoptera;Melitaea didyma;Melitaea didyma;1;Melitaea didyma;0.999768602965124;  
 GU688539;Lepidoptera;Melitaea didyma;Melitaea didyma;1;Melitaea didyma;0.999870115406424;  
 GU688541;Lepidoptera;Pyrgus armoricanus;Pyrgus armoricanus;1;Pyrgus armoricanus;0.999997353848817;  
 GU688544;Lepidoptera;Lampides boeticus;Lampides boeticus;1;Lampides boeticus;0.99999999545906;  
 GU689149;Lepidoptera;Erebia cassioides;NA;0.003;NA;0.999999999999934;



GU689150;Lepidoptera;Colias phicomone;NA;0.001;Colias phicomone;0.985598879697681;  
GU689154;Lepidoptera;Agriades orbitulus;Agriades orbitulus;0.002;Agriades  
orbitulus;0.999286783448229;  
GU689196;Lepidoptera;Erebia pronoe;Erebia pronoe;1;Erebia pronoe;0.999718339357544;  
GU707034;Lepidoptera;Satyrium pruni;NA;0.076;Satyrium pruni;0.990322364021655;  
GU707035;Lepidoptera;Satyrium acaciae;Satyrium acaciae;1;Satyrium acaciae;0.999999951077798;  
GU707037;Lepidoptera;Satyrium pruni;NA;0.076;Satyrium pruni;0.990322364021655;  
GU707038;Lepidoptera;Ochlodes sylvanus;NA;0.316;Ochlodes sylvanus;0.996318754838625;  
GU707039;Lepidoptera;Thymelicus sylvestris;Thymelicus sylvestris;1;Thymelicus  
sylvestris;0.99999876153052;  
GU707041;Lepidoptera;Melitaea britomartis;NA;NA;Melitaea britomartis;0.960348127420398;  
GU707085;Lepidoptera;Cupido minimus;NA;0.008;Cupido minimus;0.999319672482489;  
GU707087;Lepidoptera;Vanessa cardui;Vanessa cardui;1;Vanessa cardui;0.999996792914969;  
GU707088;Lepidoptera;Nymphalis c-album;NA;0.215;NA;0.999999192918557;  
GU707089;Lepidoptera;Lycaena phlaeas;Lycaena phlaeas;1;Lycaena phlaeas;0.999999996363186;  
GU707091;Lepidoptera;Fabriciana adippe;Fabriciana adippe;0.004;Fabriciana  
adippe;0.991347020421632;  
GU707092;Lepidoptera;Araschnia levana;Araschnia levana;1;Araschnia levana;0.999999772187832;  
GU707095;Lepidoptera;Limenitis camilla;Limenitis camilla;1;Limenitis camilla;0.999951160156017;  
GU707097;Lepidoptera;Thymelicus lineola;Thymelicus lineola;1;Thymelicus  
lineola;0.999971535093703;  
GU707098;Lepidoptera;Satyrium w-album;NA;0.056;Satyrium w-album;0.989378230996316;  
GU707100;Lepidoptera;Celastrina argiolus;Celastrina argiolus;1;Celastrina  
argiolus;0.999708846309046;  
GU707102;Lepidoptera;Lasiommata maera;Lasiommata maera;1;Lasiommata maera;0.99999510792253;  
GU707115;Lepidoptera;Argynnis aglaja;NA;0.001;NA;0.999999999999586;  
GU707127;Lepidoptera;Fabriciana adippe;NA;0.001;Fabriciana adippe;0.957131879909897;  
GU707134;Lepidoptera;Plebejus argyrognomon;NA;0.001;NA;0.994620093546684;  
GU707145;Lepidoptera;Plebejus argyrognomon;NA;0.001;NA;0.994620093546684;  
GU707146;Lepidoptera;Coenonympha glycerion;NA;0.153;Coenonympha glycerion;0.999998464013956;  
GU707147;Lepidoptera;Coenonympha oedippus;Coenonympha oedippus;1;Coenonympha  
oedippus;0.999999999999659;  
GU707174;Lepidoptera;Coenonympha pamphilus;Coenonympha pamphilus;1;Coenonympha  
pamphilus;0.999999999999744;  
GU707175;Lepidoptera;Pyrgus malvae;Pyrgus malvae;0.999;Pyrgus malvae;0.993531783407179;  
GU707177;Lepidoptera;Melanargia galathea;NA;NA;Melanargia galathea;0.943593560237409;  
GU707194;Lepidoptera;Argynnis aglaja;NA;0.001;NA;0.999999999999586;  
GU707196;Lepidoptera;Apatura ilia;NA;0.165;Apatura ilia;0.956796812031481;  
GU707265;Lepidoptera;Plebejus argus;Plebejus argus;0.013;Plebejus argus;0.99029909759821;  
GU707266;Lepidoptera;Plebejus argyrognomon;NA;0.001;NA;0.994620093546684;  
GU707268;Lepidoptera;Polyommatus daphnis;Polyommatus daphnis;0.008;Polyommatus  
daphnis;0.99732138840566;  
GU707270;Lepidoptera;Phengaris arion;NA;0.054;Phengaris arion;0.938397095316026;  
GU707272;Lepidoptera;Lycaena phlaeas;Lycaena phlaeas;1;Lycaena phlaeas;0.999999996363186;  
GU707297;Lepidoptera;Coenonympha glycerion;NA;0.1;Coenonympha glycerion;0.99999728912966;  
GU707298;Lepidoptera;Minois dryas;NA;0.025;Minois dryas;0.850746026247397;  
GU707335;Lepidoptera;Colias alfacariensis;Colias alfacariensis;1;Colias  
alfacariensis;0.999986994131001;  
GU828583;Lepidoptera;Pyrgus malvae;Pyrgus malvae;NA;Pyrgus malvae;0.982672823248561;  
GU828690;Lepidoptera;Colias palaeno;NA;0.001;NA;0.99999999978266;  
GU828706;Lepidoptera;Favonius quercus;Favonius quercus;NA;Favonius quercus;0.77732345775836;  
GU947444;Lepidoptera;Parnassius apollo;Parnassius apollo;0.001;NA;0.954009296748392;  
GU947445;Lepidoptera;Parnassius apollo;Parnassius apollo;0.001;NA;0.954009296748392;  
GU947446;Lepidoptera;Parnassius apollo;Parnassius apollo;1;NA;0.874350707747126;  
GU947447;Lepidoptera;Parnassius apollo;Parnassius apollo;NA;NA;0.884165190246321;  
GU947448;Lepidoptera;Parnassius apollo;Parnassius apollo;NA;NA;0.884165190246321;  
GU947449;Lepidoptera;Parnassius apollo;Parnassius apollo;NA;NA;0.884165190246321;  
GU947450;Lepidoptera;Parnassius apollo;NA;NA;NA;0.838906008365956;  
GU947451;Lepidoptera;Parnassius apollo;Parnassius apollo;NA;NA;0.891902714123732;  
GU947452;Lepidoptera;Parnassius apollo;Parnassius apollo;NA;NA;0.990986284674012;  
GU947453;Lepidoptera;Parnassius apollo;Parnassius apollo;NA;NA;0.990986284674012;  
GU947454;Lepidoptera;Parnassius apollo;Parnassius apollo;NA;NA;0.985398750065504;  
GU947455;Lepidoptera;Parnassius apollo;Parnassius apollo;NA;NA;0.980153071244881;  
GU947456;Lepidoptera;Parnassius apollo;Parnassius apollo;NA;NA;0.980153071244881;  
GU947457;Lepidoptera;Parnassius apollo;Parnassius apollo;0.999;NA;0.989661638427511;  
GU947458;Lepidoptera;Parnassius apollo;Parnassius apollo;NA;NA;0.982628925458211;  
GU947459;Lepidoptera;Parnassius apollo;Parnassius apollo;NA;NA;0.99112001391321;  
GU947460;Lepidoptera;Parnassius apollo;Parnassius apollo;NA;NA;0.990986284674012;  
GU947461;Lepidoptera;Parnassius apollo;NA;0.001;NA;0.987665686594832;  
GU947462;Lepidoptera;Parnassius apollo;NA;0.001;NA;0.987665686594832;  
GU947463;Lepidoptera;Parnassius apollo;Parnassius apollo;NA;NA;0.990986284674012;  
GU947464;Lepidoptera;Parnassius apollo;Parnassius apollo;NA;NA;0.990986284674012;  
GU947465;Lepidoptera;Parnassius apollo;Parnassius apollo;0.999;NA;0.989624310088282;  
GU947466;Lepidoptera;Parnassius apollo;Parnassius apollo;0.999;NA;0.989661638427511;  
GU947467;Lepidoptera;Parnassius apollo;Parnassius apollo;0.999;NA;0.989476314717979;  
GU947468;Lepidoptera;Parnassius apollo;Parnassius apollo;NA;NA;0.990738781901465;  
GU947469;Lepidoptera;Parnassius apollo;Parnassius apollo;0.999;NA;0.989661638427511;  
GU947470;Lepidoptera;Parnassius apollo;Parnassius apollo;1;NA;0.881724007313126;

|                                 |                                       |                                    |
|---------------------------------|---------------------------------------|------------------------------------|
| GU947471;Lepidoptera;Parnassius | apollo;Parnassius                     | apollo;1;NA;0.881724007313126;     |
| GU947472;Lepidoptera;Parnassius | apollo;Parnassius                     | apollo;1;NA;0.877066671005351;     |
| GU947473;Lepidoptera;Parnassius | apollo;NA;NA;NA;0.989622139411186;    |                                    |
| GU947474;Lepidoptera;Parnassius | apollo;NA;NA;NA;0.989622139411186;    |                                    |
| GU947475;Lepidoptera;Parnassius | apollo;NA;NA;NA;0.989622139411186;    |                                    |
| GU947476;Lepidoptera;Parnassius | apollo;Parnassius                     | apollo;1;NA;0.892878752965805;     |
| GU947477;Lepidoptera;Parnassius | apollo;Parnassius                     | apollo;1;NA;0.892878752965805;     |
| GU947478;Lepidoptera;Parnassius | apollo;Parnassius                     | apollo;1;NA;0.901196708092871;     |
| GU947479;Lepidoptera;Parnassius | apollo;Parnassius                     | apollo;1;NA;0.884930209631634;     |
| GU947480;Lepidoptera;Parnassius | apollo;Parnassius                     | apollo;1;NA;0.885473976746205;     |
| GU947481;Lepidoptera;Parnassius | apollo;Parnassius                     | apollo;1;NA;0.880313379921548;     |
| GU947482;Lepidoptera;Parnassius | apollo;Parnassius                     | apollo;1;NA;0.885473976746205;     |
| GU947483;Lepidoptera;Parnassius | apollo;Parnassius                     | apollo;1;NA;0.885473976746205;     |
| GU947484;Lepidoptera;Parnassius | apollo;Parnassius                     | apollo;0.999;NA;0.864243075312234; |
| GU947485;Lepidoptera;Parnassius | apollo;Parnassius                     | apollo;0.999;NA;0.864243075312234; |
| GU947486;Lepidoptera;Parnassius | apollo;Parnassius                     | apollo;1;NA;0.884930209631634;     |
| GU947487;Lepidoptera;Parnassius | apollo;Parnassius                     | apollo;NA;NA;0.991630921520101;    |
| GU947488;Lepidoptera;Parnassius | apollo;Parnassius                     | apollo;NA;NA;0.991630921520101;    |
| GU947489;Lepidoptera;Parnassius | apollo;Parnassius                     | apollo;NA;NA;0.990986284674012;    |
| GU947490;Lepidoptera;Parnassius | apollo;Parnassius                     | apollo;NA;NA;0.990986284674012;    |
| GU947491;Lepidoptera;Parnassius | apollo;Parnassius                     | apollo;NA;NA;0.990986284674012;    |
| GU947492;Lepidoptera;Parnassius | apollo;Parnassius                     | apollo;NA;NA;0.989345334613694;    |
| GU947493;Lepidoptera;Parnassius | apollo;Parnassius                     | apollo;NA;NA;0.990986284674012;    |
| GU947494;Lepidoptera;Parnassius | apollo;Parnassius                     | apollo;NA;NA;0.990986284674012;    |
| GU947498;Lepidoptera;Parnassius | apollo;Parnassius                     | apollo;NA;NA;0.990986284674012;    |
| GU947499;Lepidoptera;Parnassius | apollo;NA;NA;NA;0.99104307983794;     |                                    |
| GU947500;Lepidoptera;Parnassius | apollo;Parnassius                     | apollo;0.001;Parnassius            |
| jacquemonti;0.724382339654484;  |                                       |                                    |
| GU947501;Lepidoptera;Parnassius | apollo;Parnassius                     | apollo;NA;NA;0.990986284674012;    |
| GU947502;Lepidoptera;Parnassius | apollo;Parnassius                     | apollo;NA;NA;0.990986284674012;    |
| GU947503;Lepidoptera;Parnassius | apollo;Parnassius                     | apollo;NA;NA;0.990986284674012;    |
| GU947504;Lepidoptera;Parnassius | apollo;Parnassius                     | apollo;NA;NA;0.990986284674012;    |
| GU947505;Lepidoptera;Parnassius | apollo;Parnassius                     | apollo;NA;NA;0.990986284674012;    |
| GU947506;Lepidoptera;Parnassius | apollo;Parnassius                     | apollo;NA;NA;0.990986284674012;    |
| GU947507;Lepidoptera;Parnassius | apollo;Parnassius                     | apollo;NA;NA;0.990986284674012;    |
| GU947508;Lepidoptera;Parnassius | apollo;Parnassius                     | apollo;NA;NA;0.990986284674012;    |
| GU947509;Lepidoptera;Parnassius | apollo;NA;NA;NA;0.99063758966645;     |                                    |
| GU947510;Lepidoptera;Parnassius | apollo;Parnassius                     | apollo;NA;NA;0.990986284674012;    |
| GU947511;Lepidoptera;Parnassius | apollo;Parnassius                     | apollo;NA;NA;0.990986284674012;    |
| GU947512;Lepidoptera;Parnassius | apollo;Parnassius                     | apollo;NA;NA;0.990986284674012;    |
| GU947513;Lepidoptera;Parnassius | apollo;Parnassius                     | apollo;NA;NA;0.968271506029224;    |
| GU947514;Lepidoptera;Parnassius | apollo;Parnassius                     | apollo;NA;NA;0.990986284674012;    |
| GU947515;Lepidoptera;Parnassius | apollo;Parnassius                     | apollo;NA;NA;0.990986284674012;    |
| GU947516;Lepidoptera;Parnassius | apollo;Parnassius                     | apollo;NA;NA;0.990986284674012;    |
| GU947517;Lepidoptera;Parnassius | apollo;Parnassius                     | apollo;NA;NA;0.990006916560279;    |
| GU947518;Lepidoptera;Parnassius | apollo;Parnassius                     | apollo;NA;NA;0.990006916560279;    |
| GU947519;Lepidoptera;Parnassius | apollo;Parnassius                     | apollo;NA;NA;0.989198282108868;    |
| GU947520;Lepidoptera;Parnassius | apollo;Parnassius                     | apollo;NA;NA;0.990986284674012;    |
| GU947521;Lepidoptera;Parnassius | apollo;NA;0.001;NA;0.989131741916346; |                                    |
| GU947522;Lepidoptera;Parnassius | apollo;Parnassius                     | apollo;NA;NA;0.990986284674012;    |
| GU947523;Lepidoptera;Parnassius | apollo;NA;0.001;NA;0.989131741916346; |                                    |
| GU947524;Lepidoptera;Parnassius | apollo;Parnassius                     | apollo;NA;NA;0.992468773499913;    |
| GU947525;Lepidoptera;Parnassius | apollo;Parnassius                     | apollo;NA;NA;0.990986284674012;    |
| GU947526;Lepidoptera;Parnassius | apollo;NA;0.001;NA;0.989131741916346; |                                    |
| GU947527;Lepidoptera;Parnassius | apollo;NA;NA;NA;0.98930649699472;     |                                    |
| GU947528;Lepidoptera;Parnassius | apollo;NA;0.001;NA;0.989131741916346; |                                    |
| GU947529;Lepidoptera;Parnassius | apollo;Parnassius                     | apollo;NA;NA;0.988735135315133;    |
| GU947530;Lepidoptera;Parnassius | apollo;NA;NA;NA;0.989526577070085;    |                                    |
| GU947531;Lepidoptera;Parnassius | apollo;NA;NA;NA;0.989526577070085;    |                                    |
| GU947532;Lepidoptera;Parnassius | apollo;NA;NA;NA;0.989526577070085;    |                                    |
| GU947533;Lepidoptera;Parnassius | apollo;NA;NA;NA;0.989526577070085;    |                                    |
| GU947534;Lepidoptera;Parnassius | apollo;Parnassius                     | apollo;NA;NA;0.988735135315133;    |
| GU947535;Lepidoptera;Parnassius | apollo;NA;NA;NA;0.989526577070085;    |                                    |
| GU947536;Lepidoptera;Parnassius | apollo;                               |                                    |

GU947551;Lepidoptera;Parnassius apollo;NA;NA;NA;0.989526577070085;  
GU947552;Lepidoptera;Parnassius apollo;NA;NA;NA;0.989526577070085;  
GU947553;Lepidoptera;Parnassius apollo;NA;NA;NA;0.989526577070085;  
GU947554;Lepidoptera;Parnassius apollo;NA;NA;NA;0.989526577070085;  
GU947555;Lepidoptera;Parnassius apollo;NA;NA;NA;0.989526577070085;  
GU947556;Lepidoptera;Parnassius apollo;Parnassius apollo;NA;NA;0.990738781901465;  
GU947557;Lepidoptera;Parnassius apollo;Parnassius apollo;NA;NA;0.990986284674012;  
GU947558;Lepidoptera;Parnassius apollo;NA;0.001;NA;0.989131741916346;  
GU947559;Lepidoptera;Parnassius apollo;NA;0.001;NA;0.989131741916346;  
GU947560;Lepidoptera;Parnassius apollo;NA;0.001;NA;0.989131741916346;  
GU947561;Lepidoptera;Parnassius apollo;NA;0.001;NA;0.989131741916346;  
GU947562;Lepidoptera;Parnassius apollo;NA;0.001;NA;0.989131741916346;  
GU947563;Lepidoptera;Parnassius apollo;NA;0.001;NA;0.989131741916346;  
GU947564;Lepidoptera;Parnassius apollo;NA;0.001;NA;0.989131741916346;  
GU947565;Lepidoptera;Parnassius apollo;NA;0.001;NA;0.989131741916346;  
GU947566;Lepidoptera;Parnassius apollo;NA;0.001;NA;0.989131741916346;  
GU947567;Lepidoptera;Parnassius apollo;NA;0.001;NA;0.989131741916346;  
GU947568;Lepidoptera;Parnassius apollo;NA;0.001;NA;0.989131741916346;  
GU947569;Lepidoptera;Parnassius apollo;NA;0.001;NA;0.989131741916346;  
GU947570;Lepidoptera;Parnassius apollo;NA;NA;NA;0.987397047156887;  
GU947571;Lepidoptera;Parnassius apollo;NA;0.001;NA;0.990780251461868;  
GU947572;Lepidoptera;Parnassius apollo;NA;0.001;NA;0.988853415268291;  
GU947573;Lepidoptera;Parnassius apollo;NA;NA;NA;0.988517365719056;  
GU947574;Lepidoptera;Parnassius apollo;NA;NA;NA;0.931742877733348;  
GU947575;Lepidoptera;Parnassius apollo;NA;NA;NA;0.931742877733348;  
GU947583;Lepidoptera;Parnassius apollo;NA;0.001;NA;0.982466026230959;  
GU947584;Lepidoptera;Parnassius apollo;NA;0.001;NA;0.982466026230959;  
GU947585;Lepidoptera;Parnassius apollo;NA;0.001;NA;0.982326083382435;  
GU947586;Lepidoptera;Parnassius apollo;NA;0.001;NA;0.982466026230959;  
GU947587;Lepidoptera;Parnassius apollo;NA;0.001;NA;0.982466026230959;  
GU947588;Lepidoptera;Parnassius apollo;NA;0.001;NA;0.978298787359085;  
GU947589;Lepidoptera;Parnassius apollo;NA;0.001;NA;0.982466026230959;  
GU947591;Lepidoptera;Parnassius apollo;NA;0.003;NA;0.987369084481944;  
GU947592;Lepidoptera;Parnassius apollo;NA;NA;NA;0.979874532524271;  
GU947593;Lepidoptera;Parnassius apollo;NA;0.001;NA;0.859092122961634;  
GU947594;Lepidoptera;Parnassius apollo;Parnassius apollo;0.001;NA;0.826902666720126;  
GU947595;Lepidoptera;Parnassius apollo;NA;NA;NA;0.979874532524271;  
GU947596;Lepidoptera;Parnassius apollo;NA;NA;NA;0.978391058808047;  
GU947597;Lepidoptera;Parnassius apollo;NA;NA;NA;0.979874532524271;  
GU947598;Lepidoptera;Parnassius apollo;NA;NA;NA;0.979874532524271;  
GU947599;Lepidoptera;Parnassius apollo;NA;NA;NA;0.979874532524271;  
GU947600;Lepidoptera;Parnassius apollo;Parnassius apollo;0.003;NA;0.85448355982222;  
GU947601;Lepidoptera;Parnassius apollo;Parnassius apollo;1;NA;0.877066671005351;  
GU947602;Lepidoptera;Parnassius apollo;Parnassius apollo;1;NA;0.877066671005351;  
GU947603;Lepidoptera;Parnassius apollo;Parnassius apollo;1;NA;0.877066671005351;  
GU947604;Lepidoptera;Parnassius apollo;Parnassius apollo;1;NA;0.877066671005351;  
GU947605;Lepidoptera;Parnassius apollo;Parnassius apollo;1;NA;0.877066671005351;  
GU947606;Lepidoptera;Parnassius apollo;Parnassius apollo;1;NA;0.877066671005351;  
GU947607;Lepidoptera;Parnassius apollo;Parnassius apollo;1;NA;0.877066671005351;  
GU947608;Lepidoptera;Parnassius apollo;Parnassius apollo;1;NA;0.877066671005351;  
GU947609;Lepidoptera;Parnassius apollo;Parnassius apollo;1;NA;0.877066671005351;  
GU947610;Lepidoptera;Parnassius apollo;Parnassius apollo;1;NA;0.877066671005351;  
GU947611;Lepidoptera;Parnassius apollo;Parnassius apollo;1;NA;0.877066671005351;  
GU947612;Lepidoptera;Parnassius apollo;Parnassius apollo;1;NA;0.877066671005351;  
GU947614;Lepidoptera;Parnassius apollo;NA;0.001;NA;0.982672372363842;  
GU947615;Lepidoptera;Parnassius apollo;NA;0.001;NA;0.982672372363842;  
GU947616;Lepidoptera;Parnassius apollo;Parnassius apollo;0.999;NA;0.8780739642792;  
GU947617;Lepidoptera;Parnassius apollo;Parnassius apollo;0.999;NA;0.839977154997076;  
GU947618;Lepidoptera;Parnassius apollo;NA;0.001;NA;0.984034011587861;  
GU947619;Lepidoptera;Parnassius apollo;NA;0.001;NA;0.984010646751428;  
GU947620;Lepidoptera;Parnassius apollo;Parnassius apollo;0.999;NA;0.859789013545169;  
GU947621;Lepidoptera;Parnassius apollo;Parnassius apollo;0.999;NA;0.859789013545169;  
GU947623;Lepidoptera;Parnassius apollo;Parnassius apollo;0.999;NA;0.860891429270674;  
GU947624;Lepidoptera;Parnassius apollo;Parnassius apollo;0.999;NA;0.87199384371568;  
GU947625;Lepidoptera;Parnassius apollo;Parnassius apollo;0.999;NA;0.872528875466083;  
GU947626;Lepidoptera;Parnassius apollo;Parnassius apollo;0.999;NA;0.87199384371568;  
GU947627;Lepidoptera;Parnassius apollo;Parnassius apollo;NA;NA;0.796513812421955;  
GU947628;Lepidoptera;Parnassius apollo;Parnassius apollo;0.999;NA;0.872528875466083;  
GU947629;Lepidoptera;Parnassius apollo;Parnassius apollo;0.999;NA;0.87199384371568;  
GU947630;Lepidoptera;Parnassius apollo;Parnassius apollo;0.999;NA;0.87199384371568;  
GU947631;Lepidoptera;Parnassius apollo;Parnassius apollo;0.999;NA;0.867370424573712;  
GU947632;Lepidoptera;Parnassius apollo;NA;0.001;NA;0.984034011587861;  
GU947633;Lepidoptera;Parnassius apollo;NA;0.001;NA;0.984034011587861;  
GU947634;Lepidoptera;Parnassius apollo;NA;0.001;NA;0.984034011587861;  
GU947635;Lepidoptera;Parnassius apollo;NA;0.001;NA;0.984034011587861;  
GU947636;Lepidoptera;Parnassius apollo;Parnassius apollo;0.999;NA;0.87199384371568;  
GU947637;Lepidoptera;Parnassius apollo;NA;0.001;NA;0.982672372363842;  
GU947642;Lepidoptera;Parnassius mnemosyne;Parnassius mnemosyne;1;NA;0.994080593898526;

GUPPY161-17;Lepidoptera;Pieris rapae;NA;NA;NA;0.9999999999999999;  
GWOTL182-13;Lepidoptera;Limenitis camilla;Limenitis camilla;0.005;Limenitis  
camilla;0.999978382657506;  
GWOU014-19;Lepidoptera;Thymelicus lineola;Thymelicus lineola;1;Thymelicus  
lineola;0.999971535093703;  
HBNK074-07;Lepidoptera;Boloria thore;Boloria thore;1;Boloria thore;0.999999717205594;  
HBNK075-07;Lepidoptera;Boloria thore;Boloria thore;1;Boloria thore;0.999999717205594;  
HBNK077-07;Lepidoptera;Boloria thore;Boloria thore;1;Boloria thore;0.999999425077642;  
HBNK292-07;Lepidoptera;Colias palaeno;NA;0.002;NA;0.99999999983681;  
HBNKB355-07;Lepidoptera;Polygonia c-album;NA;0.08;Polygonia calbum;0.847312432756229;  
HBNKB361-07;Lepidoptera;Polygonia c-album;NA;0.215;NA;0.999999192918557;  
HBOK031-08;Lepidoptera;Hipparchia semele;NA;0.001;Hipparchia semele;0.708426894198838;  
HBOK101-08;Lepidoptera;Erebia eriphyle;Erebia eriphyle;1;Erebia eriphyle;0.870864608181857;  
HBOK175-08;Lepidoptera;Polyommatus icarus;Polyommatus icarus;NA;Dissomorphia  
australiaria;0.985686791525344;  
HE614681;Lepidoptera;Erebia pronoe;Erebia pronoe;1;Erebia pronoe;0.999627827275307;  
HE614682;Lepidoptera;Erebia manto;Erebia manto;0.999;Erebia manto;0.999814324036993;  
HE614683;Lepidoptera;Erebia epiphron;NA;NA;Erebia epiphron;0.887560949368923;  
HE775142;Lepidoptera;Colias hyale;Colias hyale;0.043;Colias hyale;0.999998111229864;  
HE775143;Lepidoptera;Colias hyale;Colias hyale;0.043;Colias hyale;0.999998111229864;  
HG326621;Lepidoptera;Phengaris arion;NA;0.021;NA;0.791339524332038;  
HG326623;Lepidoptera;Phengaris arion;NA;0.021;NA;0.791339524332038;  
HG326624;Lepidoptera;Phengaris arion;NA;0.021;NA;0.791339524332038;  
HG326625;Lepidoptera;Phengaris arion;NA;0.021;NA;0.791339524332038;  
HG326626;Lepidoptera;Phengaris arion;NA;0.021;NA;0.791339524332038;  
HG326627;Lepidoptera;Phengaris arion;NA;0.021;NA;0.791339524332038;  
HG326628;Lepidoptera;Phengaris arion;NA;0.021;NA;0.791339524332038;  
HG326629;Lepidoptera;Phengaris arion;NA;0.021;NA;0.791339524332038;  
HG326630;Lepidoptera;Phengaris arion;NA;0.021;NA;0.790855775694374;  
HG326631;Lepidoptera;Phengaris arion;NA;0.021;NA;0.791339524332038;  
HG326632;Lepidoptera;Phengaris arion;NA;0.021;NA;0.791339524332038;  
HG326633;Lepidoptera;Phengaris arion;NA;0.021;NA;0.791339524332038;  
HG326634;Lepidoptera;Phengaris arion;NA;0.021;NA;0.792894606077744;  
HG326635;Lepidoptera;Phengaris arion;NA;0.021;NA;0.791339524332038;  
HG326636;Lepidoptera;Phengaris arion;NA;0.021;NA;0.79148828313844;  
HG326637;Lepidoptera;Phengaris arion;NA;0.021;NA;0.79148828313844;  
HG326638;Lepidoptera;Phengaris arion;NA;0.021;NA;0.793579063388615;  
HG326639;Lepidoptera;Phengaris arion;NA;0.021;NA;0.793579063388615;  
HG326640;Lepidoptera;Phengaris arion;NA;0.021;NA;0.791620191442083;  
HG326641;Lepidoptera;Phengaris arion;NA;0.002;NA;0.801921507536285;  
HG326642;Lepidoptera;Phengaris arion;NA;0.021;NA;0.791620191442083;  
HM116932;Lepidoptera;Polyommatus eros;NA;NA;NA;0.999998891555751;  
HM116935;Lepidoptera;Polyommatus icarus;NA;0.001;NA;0.999999549662548;  
HM116936;Lepidoptera;Polyommatus icarus;Polyommatus icarus;0.002;Polyommatus  
icarus;0.809019347212362;  
HM116937;Lepidoptera;Polyommatus icarus;Polyommatus icarus;0.001;Polyommatus  
icarus;0.973614065192442;  
HM116939;Lepidoptera;Polyommatus icarus;NA;NA;NA;0.999999509666107;  
HM116940;Lepidoptera;Polyommatus icarus;NA;0.001;Polyommatus icarus;0.748264214277749;  
HM159431;Lepidoptera;Plebejus argyrognomon;NA;0.001;NA;0.996739256512481;  
HM210169;Lepidoptera;Polyommatus humedasa;Polyommatus humedasa;1;NA;0.946645845760546;  
HM386883;Lepidoptera;Boloria thore;Boloria thore;1;Boloria thore;0.99999998160007;  
HM386884;Lepidoptera;Boloria thore;Boloria thore;1;Boloria thore;0.9999999245631;  
HM386892;Lepidoptera;Pyrgus andromedae;Pyrgus andromedae;1;Pyrgus andromedae;0.999854960792946;  
HM391781;Lepidoptera;Scolitantides orion;Scolitantides orion;1;Scolitantides  
orion;0.999999988125126;  
HM391783;Lepidoptera;Polyommatus icarus;NA;0.001;NA;0.999994270558956;  
HM391816;Lepidoptera;Anthocharis cardamines;Anthocharis cardamines;1;Anthocharis  
cardamines;0.999999871062621;  
HM391817;Lepidoptera;Colias palaeno;NA;0.001;NA;0.99999999982869;  
HM391818;Lepidoptera;Apatura ilia;NA;0.165;Apatura ilia;0.956796812031481;  
HM391819;Lepidoptera;Apatura ilia;NA;0.133;Apatura ilia;0.891986785422262;  
HM391821;Lepidoptera;Boloria selene;NA;0.253;Boloria selene;0.999999785347507;  
HM391822;Lepidoptera;Boloria titania;Boloria titania;0.001;Boloria titania;0.99983358374111;  
HM391827;Lepidoptera;Maniola jurtina;NA;0.174;Maniola jurtina;0.716224233181708;  
HM391828;Lepidoptera;Coenonympha pamphilus;Coenonympha pamphilus;1;Coenonympha  
pamphilus;0.99999999999744;  
HM391830;Lepidoptera;Coenonympha glycerion;NA;0.153;Coenonympha glycerion;0.999998464013956;  
HM391831;Lepidoptera;Pararge aegeria;Pararge aegeria;1;Pararge aegeria;0.999999999963165;  
HM391832;Lepidoptera;Pararge aegeria;Pararge aegeria;1;Pararge aegeria;0.999999999963165;  
HM391834;Lepidoptera;Lycaena phlaeas;Lycaena phlaeas;1;Lycaena phlaeas;0.99999967867325;  
HM391835;Lepidoptera;Lycaena tityrus;Lycaena tityrus;1;Lycaena tityrus;0.999999375548977;  
HM391836;Lepidoptera;Plebejus argus;NA;0.045;Plebejus argus;0.989189327190115;  
HM391837;Lepidoptera;Plebejus argus;NA;0.106;Plebejus argus;0.979424269542147;  
HM391838;Lepidoptera;Ochlodes sylvanus;NA;0.316;Ochlodes sylvanus;0.996318754838625;  
HM391840;Lepidoptera;Erynnis tages;Erynnis tages;1;Erynnis tages;0.999999281987018;  
HM391841;Lepidoptera;Thymelicus acteon;Thymelicus acteon;1;Thymelicus acteon;0.9999999752248;

HM391842;Lepidoptera;Thymelicus lineola;Thymelicus lineola;1;Thymelicus lineola;0.999952218376157;  
HM393172;Lepidoptera;Parnassius apollo;Parnassius apollo;1;Parnassius apollo;0.992704703916692;  
HM393173;Lepidoptera;Parnassius apollo;Parnassius apollo;1;Parnassius apollo;0.992704703916692;  
HM393174;Lepidoptera;Parnassius apollo;Parnassius apollo;1;Parnassius apollo;0.992704703916692;  
HM393176;Lepidoptera;Colias crocea;NA;0.059;NA;0.99999999999738;  
HM393177;Lepidoptera;Colias alfacariensis;Colias alfacariensis;1;Colias alfacariensis;0.999944653442302;  
HM393178;Lepidoptera;Colias phicomone;NA;0.001;Colias phicomone;0.985598879697681;  
HM393180;Lepidoptera;Aporia crataegi;NA;0.003;Aporia crataegi;0.999998466875677;  
HM393184;Lepidoptera;Gonepteryx rhamni;NA;0.192;Gonepteryx rhamni;0.991002175992451;  
HM393185;Lepidoptera;Lysandra coridon;NA;NA;NA;0.998070184737648;  
HM393186;Lepidoptera;Phengaris arion;NA;0.054;Phengaris arion;0.938397095316026;  
HM393189;Lepidoptera;Polyommatus amandus;Polyommatus amandus;0.003;Polyommatus amandus;0.999980071833264;  
HM393190;Lepidoptera;Cupido minimus;NA;0.006;Cupido minimus;0.999768371759258;  
HM393191;Lepidoptera;Lycaena virgaureae;NA;0.186;Lycaena virgaureae;0.999491227342155;  
HM393192;Lepidoptera;Lycaena tityrus;Lycaena tityrus;1;Lycaena tityrus;0.999998928238034;  
HM393193;Lepidoptera;Favonius quercus;NA;NA;Favonius quercus;0.73046069582187;  
HM393194;Lepidoptera;Favonius quercus;NA;NA;Favonius quercus;0.850630352400423;  
HM393195;Lepidoptera;Favonius quercus;NA;NA;Favonius quercus;0.73046069582187;  
HM393196;Lepidoptera;Melanargia galathea;Melanargia galathea;NA;Melanargia galathea;0.970417110336134;  
HM393197;Lepidoptera;Pararge aegeria;Pararge aegeria;1;Pararge aegeria;0.999999999963165;  
HM393198;Lepidoptera;Pararge aegeria;Pararge aegeria;1;Pararge aegeria;0.99999997581313;  
HM393199;Lepidoptera;Aphantopus hyperantus;Aphantopus hyperantus;0.009;Aphantopus hyperantus;0.999523934516809;  
HM393200;Lepidoptera;Aphantopus hyperantus;Aphantopus hyperantus;0.006;Aphantopus hyperantus;0.999998615504572;  
HM393201;Lepidoptera;Aphantopus hyperantus;Aphantopus hyperantus;0.01;Aphantopus hyperantus;0.99997523774024;  
HM393203;Lepidoptera;Coenonympha arcania;NA;0.067;Coenonympha arcania;0.978811371852141;  
HM393204;Lepidoptera;Erebia medusa;NA;0.009;Erebia medusa;0.986275612856827;  
HM393205;Lepidoptera;Erebia medusa;NA;0.009;Erebia medusa;0.986275612856827;  
HM393206;Lepidoptera;Erebia pronoe;Erebia pronoe;1;Erebia pronoe;0.999045603074731;  
HM393207;Lepidoptera;Thymelicus sylvestris;NA;0.324;Thymelicus sylvestris;0.999940778442454;  
HM393209;Lepidoptera;Carterocephalus palaemon;NA;0.052;Carterocephalus palaemon;0.728445051795325;  
HM393210;Lepidoptera;Pyrgus malvae;Pyrgus malvae;NA;Pyrgus malvae;0.980121140374433;  
HM393211;Lepidoptera;Euphydryas cynthia;Euphydryas cynthia;1;Euphydryas cynthia;0.99999999707427;  
HM393212;Lepidoptera;Brenthis ino;Brenthis ino;0.002;Brenthis ino;0.994632032669749;  
HM393213;Lepidoptera;Boloria selene;NA;0.275;Boloria selene;0.99999702697396;  
HM393214;Lepidoptera;Boloria titania;Boloria titania;0.001;Boloria titania;0.99983358374111;  
HM393216;Lepidoptera;Melitaea diamina;NA;0.305;Melitaea diamina;0.99999994065661;  
HM393217;Lepidoptera;Issoria lathonia;Issoria lathonia;1;Issoria lathonia;0.99999999989257;  
HM393220;Lepidoptera;Fabriciana niobe;NA;0.005;Fabriciana niobe;0.992125835358755;  
HM393222;Lepidoptera;Nymphalis antiopa;NA;0.23;Nymphalis antiopa;0.99999994198096;  
HM393225;Lepidoptera;Vanessa atalanta;Vanessa atalanta;1;Vanessa atalanta;0.99999999757762;  
HM393226;Lepidoptera;Apatura iris;Apatura iris;1;Apatura iris;0.99999999999972;  
HM393227;Lepidoptera;Apatura iris;Apatura iris;1;Apatura iris;0.99999999999972;  
HM393228;Lepidoptera;Apatura iris;Apatura iris;1;Apatura iris;0.99999999999946;  
HM393229;Lepidoptera;Apatura ilia;NA;0.165;Apatura ilia;0.956796812031481;  
HM393232;Lepidoptera;Cyaniris semiargus;NA;NA;Cyaniris semiargus;0.999051841766953;  
HM396370;Lepidoptera;Erebia pandrose;Erebia pandrose;0.998;Erebia pandrose;0.997117103851311;  
HM396374;Lepidoptera;Aporia crataegi;NA;NA;Aporia crataegi;0.999996899001592;  
HM400990;Lepidoptera;Pyrgus sidae;Pyrgus sidae;1;Pyrgus sidae;0.999995233751538;  
HM400991;Lepidoptera;Pyrgus armoricanus;Pyrgus armoricanus;1;Pyrgus armoricanus;0.997335970003131;  
HM400995;Lepidoptera;Agriades glandon;NA;0.026;Agriades glandon;0.973567310186356;  
HM400996;Lepidoptera;Agriades glandon;NA;0.004;Agriades glandon;0.972363327373725;  
HM400997;Lepidoptera;Agriades glandon;NA;NA;Agriades glandon;0.986958609491942;  
HM401000;Lepidoptera;Agriades glandon;NA;0.001;Agriades glandon;0.978966919354654;  
HM401001;Lepidoptera;Agriades glandon;NA;0.019;Agriades glandon;0.971626349703295;  
HM401002;Lepidoptera;Agriades glandon;Agriades glandon;0.019;Agriades glandon;0.990080177943521;  
HM401003;Lepidoptera;Aricia nicias;Aricia nicias;0.005;Aricia nicias;0.999451683966392;  
HM401005;Lepidoptera;Aricia nicias;Aricia nicias;0.005;Aricia nicias;0.999451683966392;  
HM401006;Lepidoptera;Aricia nicias;Aricia nicias;0.003;Aricia nicias;0.99891072569394;  
HM401007;Lepidoptera;Aricia nicias;Aricia nicias;0.006;Aricia nicias;0.999121647973837;  
HM401008;Lepidoptera;Aricia nicias;Aricia nicias;0.008;Aricia nicias;0.999405599877345;  
HM425834;Lepidoptera;Erebia pluto;Erebia pluto;1;Erebia pluto;0.99999988858747;  
HM425835;Lepidoptera;Erebia pluto;Erebia pluto;1;Erebia pluto;0.99999988858747;  
HM425836;Lepidoptera;Erebia pandrose;Erebia pandrose;NA;Erebia pandrose;0.956509272964271;  
HM425867;Lepidoptera;Erebia epiphron;NA;NA;Erebia epiphron;0.994401488812176;  
HM425868;Lepidoptera;Polyommatus eros;NA;0.002;Polyommatus eros;0.966901467598208;  
HM425889;Lepidoptera;Erebia epiphron;Erebia epiphron;NA;Erebia epiphron;0.998243429957028;  
HM425891;Lepidoptera;Erebia pandrose;Erebia pandrose;0.005;Erebia pandrose;0.976530044823327;  
HM425892;Lepidoptera;Agriades glandon;Agriades glandon;0.998;Agriades glandon;0.939962083086514;

HM425911;Lepidoptera;Oeneis glacialis;Oeneis glacialis;NA;Oeneis glacialis;0.974851412684016;  
HM425927;Lepidoptera;Erebia epiphron;Erebia epiphron;NA;Erebia epiphron;0.995580956478864;  
HM425931;Lepidoptera;Melitaea varia;Melitaea varia;1;Melitaea varia;0.999999652249276;  
HM425936;Lepidoptera;Colias phicomone;NA;0.001;Colias phicomone;0.985598879697681;  
HM425943;Lepidoptera;Erebia pluto;Erebia pluto;1;Erebia pluto;0.999999984692352;  
HM425944;Lepidoptera;Erebia pluto;Erebia pluto;1;Erebia pluto;0.999999976671887;  
HM425945;Lepidoptera;Polyommatus damon;Polyommatus damon;1;Polyommatus damon;0.999999882210126;  
HM425953;Lepidoptera;Thymelicus acteon;Thymelicus acteon;1;Thymelicus acteon;0.9999999752248;  
HM425954;Lepidoptera;Nymphalis c-album;NA;0.215;NA;0.999999192918557;  
HM426042;Lepidoptera;Coenonympha glycerion;NA;0.154;Coenonympha glycerion;0.999998359070115;  
HM426043;Lepidoptera;Coenonympha glycerion;NA;0.28;Coenonympha glycerion;0.999998036263913;  
HM426044;Lepidoptera;Coenonympha gardetta;NA;0.031;Coenonympha gardetta;0.700970820226565;  
HM426045;Lepidoptera;Lycaena tityrus;Lycaena tityrus;1;Lycaena tityrus;0.999995729087172;  
HM426046;Lepidoptera;Thymelicus lineola;Thymelicus lineola;1;Thymelicus  
lineola;0.999995927238524;  
HM426082;Lepidoptera;Boloria titania;Boloria titania;1;Boloria titania;0.999855929452882;  
HM426083;Lepidoptera;Melitaea diamina;NA;0.149;Melitaea diamina;0.99999996592464;  
HM426102;Lepidoptera;Boloria titania;Boloria titania;0.001;Boloria titania;0.99983358374111;  
HM426105;Lepidoptera;Coenonympha gardetta;NA;0.001;Coenonympha gardetta;0.755947323088537;  
HM426106;Lepidoptera;Coenonympha gardetta;NA;0.001;Coenonympha gardetta;0.755947323088537;  
HM870914;Lepidoptera;Favonius quercus;NA;NA;Favonius quercus;0.73046069582187;  
HM870926;Lepidoptera;Pyrgus malvae;Pyrgus malvae;NA;Pyrgus malvae;0.988055481360344;  
HM870947;Lepidoptera;Lycaena virgaureae;Lycaena virgaureae;0.048;Lycaena  
virgaureae;0.999409200513189;  
HM870974;Lepidoptera;Apatura iris;Apatura iris;1;Apatura iris;0.99999999999972;  
HM870988;Lepidoptera;Aglais urticae;Aglais urticae;0.01;Aglais urticae;0.991470569735649;  
HM870989;Lepidoptera;Aglais urticae;NA;0.002;Aglais urticae;0.987497593219019;  
HM870991;Lepidoptera;Nymphalis c-album;NA;0.215;NA;0.999999192918557;  
HM870992;Lepidoptera;Nymphalis c-album;NA;0.2;NA;0.99999889990099;  
HM870993;Lepidoptera;Callophrys rubi;NA;0.003;Callophrys rubi;0.997328639918919;  
HM871030;Lepidoptera;Celastrina argiolus;Celastrina argiolus;1;Celastrina  
argiolus;0.999708846309046;  
HM871035;Lepidoptera;Anthocharis cardamines;Anthocharis cardamines;1;Anthocharis  
cardamines;0.999999940675226;  
HM871037;Lepidoptera;Anthocharis cardamines;Anthocharis cardamines;1;Anthocharis  
cardamines;0.999999843941806;  
HM871043;Lepidoptera;Pieris napi;NA;NA;Pieris napi;0.929162374195885;  
HM871044;Lepidoptera;Carterocephalus palaemon;Carterocephalus palaemon;0.016;Carterocephalus  
palaemon;0.930544560040029;  
HM871046;Lepidoptera;Pieris napi;NA;NA;Pieris napi;0.970569233032173;  
HM871158;Lepidoptera;Papilio machaon;Papilio machaon;0.003;Papilio machaon;0.997288237409893;  
HM871218;Lepidoptera;Melitaea cinxia;Melitaea cinxia;0.02;Melitaea cinxia;0.999999999999432;  
HM871219;Lepidoptera;Pyrgus malvae;Pyrgus malvae;NA;Pyrgus malvae;0.980121140374433;  
HM871230;Lepidoptera;Favonius quercus;NA;NA;Favonius quercus;0.73046069582187;  
HM871271;Lepidoptera;Gonepteryx rhamni;NA;0.474;Gonepteryx rhamni;0.982076396127858;  
HM871277;Lepidoptera;Vanessa cardui;Vanessa cardui;1;Vanessa cardui;0.999999547500397;  
HM871278;Lepidoptera;Vanessa atalanta;Vanessa atalanta;1;Vanessa atalanta;0.9999999790276;  
HM871746;Lepidoptera;Ochlodes sylvanus;NA;0.332;Ochlodes sylvanus;0.995966031721723;  
HM871747;Lepidoptera;Ochlodes sylvanus;NA;NA;Ochlodes sylvanus;0.997133711363483;  
HM871867;Lepidoptera;Polyommatus amandus;Polyommatus amandus;0.003;Polyommatus  
amandus;0.999980071833264;  
HM871879;Lepidoptera;Aricia eumedon;Eumedonia eumedon;0.001;Eumedonia eumedon;0.997942473254099;  
HM871895;Lepidoptera;Aphantopus hyperantus;Aphantopus hyperantus;0.003;Aphantopus  
hyperantus;0.999999455871523;  
HM871925;Lepidoptera;Plebejus argus;NA;0.114;Plebejus argus;0.984076165564578;  
HM871926;Lepidoptera;Plebejus idas;NA;0.002;NA;0.999633477464423;  
HM871927;Lepidoptera;Plebejus idas;NA;0.007;NA;0.999546324331549;  
HM871929;Lepidoptera;Agriades optilete;Agriades optilete;1;Agriades optilete;0.99999999183251;  
HM871930;Lepidoptera;Agriades optilete;Agriades optilete;1;Agriades optilete;0.99999999183251;  
HM871931;Lepidoptera;Plebejus idas;NA;0.007;NA;0.999546324331549;  
HM871932;Lepidoptera;Aricia artaxerxes;Plebejus argus;1;Aricia artaxerxes;0.999743187199922;  
HM871933;Lepidoptera;Polyommatus amandus;Polyommatus amandus;0.003;Polyommatus  
amandus;0.999980071833264;  
HM871937;Lepidoptera;Brenthis ino;Brenthis ino;0.001;Brenthis ino;0.994711912827522;  
HM871938;Lepidoptera;Brenthis ino;Brenthis ino;0.998;Brenthis ino;0.992517169157773;  
HM871939;Lepidoptera;Argynnis aglaja;NA;NA;NA;0.999999999998051;  
HM872111;Lepidoptera;Lycaena phlaeas;Lycaena phlaeas;1;Lycaena phlaeas;0.999999996363186;  
HM872188;Lepidoptera;Glaucopsyche alexis;NA;NA;Glaucopsyche alexis;0.979381169624069;  
HM872343;Lepidoptera;Glaucopsyche alexis;NA;NA;Glaucopsyche alexis;0.979381169624069;  
HM872811;Lepidoptera;Satyrium w-album;NA;0.122;Satyrium w-album;0.97166364363414;  
HM872822;Lepidoptera;Callophrys rubi;NA;0.003;Callophrys rubi;0.997328639918919;  
HM872835;Lepidoptera;Papilio machaon;Papilio machaon;NA;Papilio machaon;0.998259418780604;  
HM872901;Lepidoptera;Papilio machaon;Papilio machaon;NA;Papilio machaon;0.998428074612506;  
HM872932;Lepidoptera;Lycaena tityrus;Lycaena tityrus;1;Lycaena tityrus;0.999998928238034;  
HM872936;Lepidoptera;Euphydryas aurinia;NA;0.001;Euphydryas aurinia;0.995576749826865;  
HM872958;Lepidoptera;Apatura iris;Apatura iris;1;Apatura iris;0.99999999999972;  
HM872960;Lepidoptera;Apatura ilia;Apatura ilia;NA;Apatura ilia;0.988792300608896;  
HM873003;Lepidoptera;Araschnia levana;Araschnia levana;1;Araschnia levana;0.999999772187832;

HM873004;Lepidoptera;Araschnia levana;Araschnia levana;1;Araschnia levana;0.999999772187832;  
HM873036;Lepidoptera;Colias hyale;NA;NA;Colias hyale;0.999975737287978;  
HM873051;Lepidoptera;Thecla betulae;Thecla betulae;1;Thecla betulae;0.99999999961119;  
HM873110;Lepidoptera;Coenonympha glycerion;NA;0.295;Coenonympha glycerion;0.999998958157621;  
HM873189;Lepidoptera;Erebia pandrose;Erebia pandrose;0.998;Erebia pandrose;0.997117103851311;  
HM873260;Lepidoptera;Boloria euphrosyne;Boloria euphrosyne;1;Boloria euphrosyne;0.999989902710144;  
HM873306;Lepidoptera;Argynnis aglaja;NA;NA;NA;0.999999999998051;  
HM873358;Lepidoptera;Lasioommata maera;Lasioommata maera;1;Lasioommata maera;0.999999181072746;  
HM873490;Lepidoptera;Pyrgus alveus;NA;NA;Pyrgus alveus;0.922887984165083;  
HM873544;Lepidoptera;Maniola jurtina;NA;NA;NA;0.99999999991;  
HM873568;Lepidoptera;Hipparchia semele;NA;0.002;Hipparchia semele;0.81627604446986;  
HM873571;Lepidoptera;Maniola jurtina;NA;0.001;Maniola jurtina;0.939220105860875;  
HM873572;Lepidoptera;Maniola jurtina;NA;0.038;NA;0.99999999999524;  
HM873620;Lepidoptera;Gonepteryx rhamni;NA;0.474;Gonepteryx rhamni;0.982076396127858;  
HM874159;Lepidoptera;Colias croceus;NA;0.059;NA;0.99999999999738;  
HM874490;Lepidoptera;Plebejus argus;NA;0.328;Plebejus argus;0.969789734199889;  
HM874491;Lepidoptera;Aricia artaxerxes;Plebejus argus;1;Aricia artaxerxes;0.999743187199922;  
HM874569;Lepidoptera;Coenonympha glycerion;NA;0.264;Coenonympha glycerion;0.999998370144304;  
HM874610;Lepidoptera;Coenonympha pamphilus;Coenonympha pamphilus;1;Coenonympha pamphilus;0.99999999999858;  
HM874632;Lepidoptera;Lycaena phlaeas;Lycaena phlaeas;1;Lycaena phlaeas;0.99999996363186;  
HM874652;Lepidoptera;Carterocephalus palaemon;NA;0.052;Carterocephalus palaemon;0.728445051795325;  
HM874653;Lepidoptera;Carterocephalus palaemon;NA;0.052;Carterocephalus palaemon;0.728445051795325;  
HM874822;Lepidoptera;Helleia helle;Lycaena helle;1;Lycaena helle;0.99999993533947;  
HM874823;Lepidoptera;Helleia helle;Lycaena helle;1;Lycaena helle;0.99999993533947;  
HM874824;Lepidoptera;Cupido minimus;NA;0.009;Cupido minimus;0.999791453712643;  
HM874825;Lepidoptera;Cupido minimus;NA;0.004;Cupido minimus;0.999720131986281;  
HM874826;Lepidoptera;Cupido argiades;NA;0.499;NA;0.99999999984682;  
HM874827;Lepidoptera;Cupido argiades;NA;0.499;NA;0.99999999984682;  
HM875785;Lepidoptera;Issoria lathonia;Issoria lathonia;1;Issoria lathonia;0.99999999981071;  
HM875813;Lepidoptera;Vanessa cardui;Vanessa cardui;1;Vanessa cardui;0.999999803450484;  
HM875908;Lepidoptera;Aricia eumedon;Eumedonia eumedon;0.001;Eumedonia eumedon;0.997532320863849;  
HM875917;Lepidoptera;Araschnia levana;Araschnia levana;1;Araschnia levana;0.999999772187832;  
HM875940;Lepidoptera;Vanessa atalanta;Vanessa atalanta;1;Vanessa atalanta;0.99999999757762;  
HM876030;Lepidoptera;Issoria lathonia;Issoria lathonia;1;Issoria lathonia;0.99999999989257;  
HM876033;Lepidoptera;Coenonympha pamphilus;Coenonympha pamphilus;1;Coenonympha pamphilus;0.99999999999716;  
HM876061;Lepidoptera;Fabriciana adippe;Fabriciana adippe;0.028;Fabriciana adippe;0.969769198942097;  
HM876062;Lepidoptera;Coenonympha glycerion;NA;0.194;Coenonympha glycerion;0.999999237873431;  
HM876085;Lepidoptera;Thecla betulae;Thecla betulae;1;Thecla betulae;0.99999999977774;  
HM876171;Lepidoptera;Erebia pandrose;Erebia pandrose;0.998;Erebia pandrose;0.997117103851311;  
HM876206;Lepidoptera;Lycaena virgaureae;Lycaena virgaureae;0.027;Lycaena virgaureae;0.999582921361102;  
HM876209;Lepidoptera;Thymelicus lineola;Thymelicus lineola;1;Thymelicus lineola;0.999971535093703;  
HM901207;Lepidoptera;Carcharodus lavatherae;Carcharodus lavatherae;1;Carcharodus lavatherae;0.999975293871709;  
HM901208;Lepidoptera;Pyrgus onopordi;Pyrgus onopordi;1;Pyrgus onopordi;0.999997111229755;  
HM901209;Lepidoptera;Aporia crataegi;NA;NA;Aporia crataegi;0.999996781126733;  
HM901221;Lepidoptera;Melitaea didyma;Melitaea didyma;1;Melitaea didyma;0.998043552633492;  
HM901224;Lepidoptera;Hipparchia hermione;Hipparchia hermione;1;Hipparchia hermione;0.999892638915927;  
HM901225;Lepidoptera;Hipparchia hermione;Hipparchia hermione;1;Hipparchia hermione;0.999900116531443;  
HM901227;Lepidoptera;Carcharodus lavatherae;Carcharodus lavatherae;1;Carcharodus lavatherae;0.999975293871709;  
HM901228;Lepidoptera;Pyrgus onopordi;Pyrgus onopordi;1;Pyrgus onopordi;0.999997111229755;  
HM901229;Lepidoptera;Pyrgus onopordi;Pyrgus onopordi;1;Pyrgus onopordi;0.999997111229755;  
HM901230;Lepidoptera;Pyrgus onopordi;Pyrgus onopordi;1;Pyrgus onopordi;0.999997111229755;  
HM901232;Lepidoptera;Maniola cecilia;Pyronia cecilia;NA;Pyronia cecilia;1;  
HM901233;Lepidoptera;Hipparchia fidia;Hipparchia fidia;1;Hipparchia fidia;1;  
HM901234;Lepidoptera;Favonius quercus;NA;0.19;Favonius quercus;0.798566809308261;  
HM901235;Lepidoptera;Melitaea parthenoides;Melitaea parthenoides;1;Melitaea parthenoides;0.999999956653455;  
HM901236;Lepidoptera;Melitaea parthenoides;Melitaea parthenoides;1;Melitaea parthenoides;0.99999980399821;  
HM901238;Lepidoptera;Coenonympha dorus;Coenonympha dorus;1;Coenonympha dorus;0.9999999988259;  
HM901239;Lepidoptera;Glaucopsyche alexis;Glaucopsyche alexis;NA;Glaucopsyche alexis;0.989960894737762;  
HM901240;Lepidoptera;Argynnis aglaja;NA;NA;Speyeria aglaja;0.785160490959768;  
HM901244;Lepidoptera;Erebia pronoe;Erebia pronoe;1;Erebia pronoe;0.99980482908169;  
HM901246;Lepidoptera;Scolitantides orion;Scolitantides orion;1;Scolitantides orion;0.999999953757596;  
HM901247;Lepidoptera;Erebia meolans;Erebia meolans;0.999;Erebia meolans;0.99980804531561;

HM901248;Lepidoptera;Glaucopsyche alexis;Glaucopsyche alexis;0.001;Glaucopsyche alexis;0.994667256195263;  
HM901249;Lepidoptera;Melitaea didyma;Melitaea didyma;1;Melitaea didyma;0.989721238423191;  
HM901250;Lepidoptera;Melitaea didyma;Melitaea didyma;0.015;Melitaea didyma;0.979252256105077;  
HM901251;Lepidoptera;Melitaea didyma;Melitaea didyma;1;Melitaea didyma;0.989721238423191;  
HM901252;Lepidoptera;Papilio machaon;Papilio machaon;NA;Papilio machaon;0.998489747694706;  
HM901253;Lepidoptera;Thymelicus sylvestris;Thymelicus sylvestris;1;Thymelicus sylvestris;0.999999985935205;  
HM901254;Lepidoptera;Erebia pronoe;Erebia pronoe;1;Erebia pronoe;0.99980482908169;  
HM901256;Lepidoptera;Euphydryas aurinia;Euphydryas aurinia;0.02;Euphydryas aurinia;0.99668249939786;  
HM901257;Lepidoptera;Nymphalis c-album;NA;0.215;NA;0.999999192918557;  
HM901258;Lepidoptera;Erebia pronoe;Erebia pronoe;1;Erebia pronoe;0.99980482908169;  
HM901259;Lepidoptera;Melitaea nevadensis;Melitaea celadussa;1;Melitaea celadussa;0.996894039568781;  
HM901260;Lepidoptera;Erebia pronoe;Erebia pronoe;1;Erebia pronoe;0.99980482908169;  
HM901261;Lepidoptera;Thymelicus sylvestris;Thymelicus sylvestris;1;Thymelicus sylvestris;0.999999985935205;  
HM901266;Lepidoptera;Glaucopsyche alexis;NA;NA;Glaucopsyche alexis;0.991019528246159;  
HM901267;Lepidoptera;Erebia pronoe;Erebia pronoe;1;Erebia pronoe;0.99980482908169;  
HM901268;Lepidoptera;Polyommatus dorylas;Polyommatus dorylas;0.025;Polyommatus dorylas;0.973229109265438;  
HM901269;Lepidoptera;Melitaea parthenoides;Melitaea parthenoides;1;Melitaea parthenoides;0.999999993530452;  
HM901270;Lepidoptera;Melitaea didyma;Melitaea didyma;1;Melitaea didyma;0.987834979325531;  
HM901271;Lepidoptera;Hipparchia fidia;Hipparchia fidia;1;Hipparchia fidia;1;  
HM901272;Lepidoptera;Brenthis hecate;NA;0.068;Brenthis hecate;0.999053551498733;  
HM901273;Lepidoptera;Brenthis hecate;NA;0.068;Brenthis hecate;0.999053551498733;  
HM901274;Lepidoptera;Carcharodus alceae;Carcharodus alceae;0.999;Carcharodus alceae;0.999999996339511;  
HM901277;Lepidoptera;Satyrium esculi;Satyrium esculi;1;Satyrium esculi;0.999999982056039;  
HM901278;Lepidoptera;Erebia meolans;Erebia meolans;NA;Erebia meolans;0.999835953426128;  
HM901279;Lepidoptera;Lycaena alciphron;Lycaena alciphron;1;Lycaena alciphron;0.999999822789549;  
HM901280;Lepidoptera;Maniola cecilia;Pyronia cecilia;1;Pyronia cecilia;0.999999999999972;  
HM901281;Lepidoptera;Melitaea deione;Melitaea deione;1;Melitaea deione;0.99999999420709;  
HM901282;Lepidoptera;Melitaea deione;Melitaea deione;1;Melitaea deione;0.99999999467633;  
HM901283;Lepidoptera;Melitaea didyma;Melitaea didyma;1;Melitaea didyma;0.998043552633492;  
HM901284;Lepidoptera;Fabriciana niobe;NA;0.001;Fabriciana niobe;0.924679661444846;  
HM901285;Lepidoptera;Lycaena alciphron;Lycaena alciphron;1;Lycaena alciphron;0.999999822789549;  
HM901287;Lepidoptera;Brenthis hecate;NA;0.068;Brenthis hecate;0.999053551498733;  
HM901288;Lepidoptera;Brenthis hecate;NA;0.068;Brenthis hecate;0.999053551498733;  
HM901290;Lepidoptera;Nymphalis c-album;NA;0.215;NA;0.999999192918557;  
HM901291;Lepidoptera;Brintesia circe;Brintesia circe;1;Brintesia circe;0.999999898349165;  
HM901292;Lepidoptera;Melitaea didyma;Melitaea didyma;1;Melitaea didyma;0.996364124392483;  
HM901293;Lepidoptera;Melitaea didyma;Melitaea didyma;1;Melitaea didyma;0.998043552633492;  
HM901294;Lepidoptera;Cercyonis lupina;Hyponphele lupina;1;Hyponphele lupina;0.999999964177108;  
HM901295;Lepidoptera;Favonius quercus;Favonius quercus;1;Favonius quercus;0.998960636885624;  
HM901296;Lepidoptera;Favonius quercus;NA;NA;Favonius quercus;0.73046069582187;  
HM901298;Lepidoptera;Cyaniris semiargus;NA;NA;Cyaniris semiargus;0.999051841766953;  
HM901299;Lepidoptera;Cyaniris semiargus;NA;NA;Cyaniris semiargus;0.999051841766953;  
HM901300;Lepidoptera;Melitaea didyma;Melitaea didyma;1;Melitaea didyma;0.996366765827355;  
HM901301;Lepidoptera;Lycaena virgaureae;Lycaena virgaureae;0.025;Lycaena virgaureae;0.999833961481754;  
HM901303;Lepidoptera;Erebia meolans;Erebia meolans;NA;Erebia meolans;0.99957934552327;  
HM901304;Lepidoptera;Erebia meolans;Erebia meolans;NA;Erebia meolans;0.99957934552327;  
HM901305;Lepidoptera;Polyommatus damon;Polyommatus damon;1;Polyommatus damon;0.999999650121315;  
HM901309;Lepidoptera;Cercyonis lupina;Hyponphele lupina;1;Hyponphele lupina;0.99999987915601;  
HM901310;Lepidoptera;Cercyonis lupina;Hyponphele lupina;1;Hyponphele lupina;0.999999969007007;  
HM901311;Lepidoptera;Gegenes nostrodamus;Gegenes nostrodamus;1;Gegenes nostrodamus;0.999999996883645;  
HM901312;Lepidoptera;Cupido osiris;Cupido osiris;1;Cupido osiris;0.999974988645513;  
HM901313;Lepidoptera;Cupido osiris;Cupido osiris;1;Cupido osiris;0.999999944757265;  
HM901314;Lepidoptera;Erebia epiphron;NA;NA;Erebia epiphron;0.950006471153786;  
HM901315;Lepidoptera;Erebia epiphron;NA;NA;Erebia epiphron;0.950006471153786;  
HM901317;Lepidoptera;Polyommatus damon;Polyommatus damon;1;Polyommatus damon;0.999999933777959;  
HM901318;Lepidoptera;Erebia manto;Erebia manto;0.009;Erebia manto;0.999861807193394;  
HM901320;Lepidoptera;Charaxes jasius;Charaxes jasius;NA;Charaxes jasius;0.985950745410897;  
HM901324;Lepidoptera;Hipparchia fidia;Hipparchia fidia;1;Hipparchia fidia;1;  
HM901325;Lepidoptera;Polyommatus damon;Polyommatus damon;1;Polyommatus damon;0.999999390653429;  
HM901326;Lepidoptera;Polyommatus daphnis;NA;0.031;Polyommatus daphnis;0.989661132749926;  
HM901327;Lepidoptera;Hipparchia fidia;Hipparchia fidia;1;Hipparchia fidia;0.999999999999886;  
HM901334;Lepidoptera;Chazara briseis;Chazara briseis;1;Chazara briseis;0.999980393060755;  
HM901340;Lepidoptera;Satyrium pruni;NA;0.076;Satyrium pruni;0.990322364021655;  
HM901341;Lepidoptera;Satyrium pruni;NA;0.076;Satyrium pruni;0.990322364021655;  
HM901342;Lepidoptera;Satyrium pruni;NA;0.076;Satyrium pruni;0.990322364021655;  
HM901343;Lepidoptera;Satyrium pruni;NA;0.076;Satyrium pruni;0.990322364021655;  
HM901344;Lepidoptera;Plebejus idas;NA;0.007;NA;0.999546324331549;



HM901345;Lepidoptera;Lycaena virgaureae;Lycaena virgaureae;0.009;Lycaena virgaureae;0.999860459836935;  
HM901348;Lepidoptera;Gonepteryx cleopatra;Gonepteryx cleopatra;0.998;Gonepteryx cleopatra;0.999118636582266;  
HM901349;Lepidoptera;Melitaea didyma;Melitaea didyma;NA;Melitaea didyma;0.980272836986251;  
HM901350;Lepidoptera;Pyrgus onopordi;Pyrgus onopordi;1;Pyrgus onopordi;0.999997111229755;  
HM901357;Lepidoptera;Erebia epiphron;NA;NA;Erebia epiphron;0.950006471153786;  
HM901359;Lepidoptera;Pyrgus onopordi;Pyrgus onopordi;1;Pyrgus onopordi;0.999998677585716;  
HM901360;Lepidoptera;Pyrgus armoricanus;Pyrgus armoricanus;1;Pyrgus armoricanus;0.999997353848817;  
HM901361;Lepidoptera;Pyrgus armoricanus;Pyrgus armoricanus;1;Pyrgus armoricanus;0.999997353848817;  
HM901362;Lepidoptera;Pyrgus serratulae;Pyrgus serratulae;1;Pyrgus serratulae;0.999999079739408;  
HM901363;Lepidoptera;Pyrgus serratulae;Pyrgus serratulae;1;Pyrgus serratulae;0.999999877361184;  
HM901364;Lepidoptera;Hamearis lucina;NA;Hamearis lucina;0.99999999984141;  
HM901366;Lepidoptera;Polyommatus eros;NA;0.005;Polyommatus eros;0.975783510541378;  
HM901367;Lepidoptera;Gonepteryx rhamni;NA;0.474;Gonepteryx rhamni;0.982076396127858;  
HM901370;Lepidoptera;Papilio machaon;Papilio machaon;0.001;Papilio machaon;0.999463129150422;  
HM901373;Lepidoptera;Melitaea diamina;NA;0.149;Melitaea diamina;0.999999996592464;  
HM901374;Lepidoptera;Melitaea diamina;NA;0.149;Melitaea diamina;0.999999996592464;  
HM901375;Lepidoptera;Melitaea parthenoides;Melitaea parthenoides;1;Melitaea parthenoides;0.999999971905084;  
HM901376;Lepidoptera;Hamearis lucina;NA;NA;Hamearis lucina;0.99999999984141;  
HM901377;Lepidoptera;Aricia eumedon;Eumedonia eumedon;1;Eumedonia eumedon;0.994829162794983;  
HM901378;Lepidoptera;Plebejus idas;NA;0.007;NA;0.999546324331549;  
HM901380;Lepidoptera;Plebejus idas;NA;0.007;NA;0.999546324331549;  
HM901381;Lepidoptera;Pyrgus serratulae;Pyrgus serratulae;1;Pyrgus serratulae;0.999999877361184;  
HM901382;Lepidoptera;Plebejus idas;NA;0.001;NA;0.999590911470354;  
HM901384;Lepidoptera;Gonepteryx rhamni;Gonepteryx rhamni;1;Gonepteryx rhamni;0.999850170258883;  
HM901386;Lepidoptera;Carcharodus lavatherae;Carcharodus lavatherae;1;Carcharodus lavatherae;0.999975293871709;  
HM901388;Lepidoptera;Scolitantides orion;Scolitantides orion;1;Scolitantides orion;0.99999953757596;  
HM901389;Lepidoptera;Melitaea diamina;Melitaea diamina;0.022;Melitaea diamina;0.999999970612266;  
HM901392;Lepidoptera;Gonepteryx rhamni;Gonepteryx rhamni;1;Gonepteryx rhamni;0.99964616790002;  
HM901400;Lepidoptera;Brintesia circe;Brintesia circe;1;Brintesia circe;0.999999625395716;  
HM901401;Lepidoptera;Fabriciana niobe;NA;0.035;Fabriciana niobe;0.949480222958778;  
HM901402;Lepidoptera;Argynnis aglaja;NA;NA;Speyeria aglaja;0.785160490959768;  
HM901403;Lepidoptera;Thymelicus sylvestris;NA;0.324;Thymelicus sylvestris;0.999940778442454;  
HM901404;Lepidoptera;Thymelicus sylvestris;NA;0.324;Thymelicus sylvestris;0.999940778442454;  
HM901405;Lepidoptera;Euphydryas aurinia;Euphydryas aurinia;0.02;Euphydryas aurinia;0.99668249939786;  
HM901406;Lepidoptera;Carcharodus lavatherae;Carcharodus lavatherae;1;Carcharodus lavatherae;0.999975293871709;  
HM901407;Lepidoptera;Pyrgus onopordi;Pyrgus onopordi;1;Pyrgus onopordi;0.999997111229755;  
HM901408;Lepidoptera;Pyrgus onopordi;Pyrgus onopordi;1;Pyrgus onopordi;0.999997111229755;  
HM901409;Lepidoptera;Cupido alcetas;NA;0.086;Cupido alcetas;0.896940516362126;  
HM901410;Lepidoptera;Thecla betulae;Thecla betulae;1;Thecla betulae;0.99999999972886;  
HM901411;Lepidoptera;Cercyonis lupina;Hyponephele lupina;1;Hyponephele lupina;0.99999989342968;  
HM901414;Lepidoptera;Maniola cecilia;Pyronia cecilia;1;Pyronia cecilia;1;  
HM901417;Lepidoptera;Fabriciana niobe;NA;0.035;Fabriciana niobe;0.949480222958778;  
HM901419;Lepidoptera;Plebejus idas;NA;0.001;NA;0.999163905769696;  
HM901420;Lepidoptera;Plebejus idas;NA;0.001;NA;0.999163905769696;  
HM901421;Lepidoptera;Pyrgus onopordi;Pyrgus onopordi;1;Pyrgus onopordi;0.999989958084683;  
HM901423;Lepidoptera;Favonius quercus;NA;NA;Favonius quercus;0.73046069582187;  
HM901424;Lepidoptera;Aricia eumedon;Eumedonia eumedon;0.003;Eumedonia eumedon;0.998278637613531;  
HM901425;Lepidoptera;Aricia eumedon;Eumedonia eumedon;0.001;Eumedonia eumedon;0.998288650724713;  
HM901426;Lepidoptera;Gonepteryx rhamni;Gonepteryx rhamni;1;Gonepteryx rhamni;0.99964616790002;  
HM901427;Lepidoptera;Polyommatus dorylas;Polyommatus dorylas;0.007;Polyommatus dorylas;0.987428194236461;  
HM901428;Lepidoptera;Scolitantides orion;Scolitantides orion;NA;Scolitantides orion;0.99999985538032;  
HM901429;Lepidoptera;Scolitantides orion;Scolitantides orion;1;Scolitantides orion;0.999999953757596;  
HM901430;Lepidoptera;Lasiommata maera;Lasiommata maera;1;Lasiommata maera;0.999997945450226;  
HM901431;Lepidoptera;Polyommatus dorylas;Polyommatus dorylas;0.025;Polyommatus dorylas;0.973229109265438;  
HM901433;Lepidoptera;Maniola cecilia;Pyronia cecilia;1;Pyronia cecilia;1;  
HM901434;Lepidoptera;Lasiommata maera;Lasiommata maera;1;Lasiommata maera;0.999997945450226;  
HM901435;Lepidoptera;Lycaena virgaureae;NA;0.077;Lycaena virgaureae;0.999717833371003;  
HM901436;Lepidoptera;Erebia meolans;Erebia meolans;NA;Erebia meolans;0.999885150395991;  
HM901437;Lepidoptera;Erebia meolans;NA;NA;Erebia meolans;0.999492139374011;  
HM901439;Lepidoptera;Melitaea diamina;NA;0.149;Melitaea diamina;0.999999996592464;  
HM901441;Lepidoptera;Aricia eumedon;Eumedonia eumedon;0.002;Eumedonia eumedon;0.997589529763314;  
HM901442;Lepidoptera;Aricia eumedon;Eumedonia eumedon;0.003;Eumedonia eumedon;0.998278637613531;  
HM901444;Lepidoptera;Cupido alcetas;NA;0.068;Cupido alcetas;0.88988907876118;  
HM901445;Lepidoptera;Erebia euryale;NA;NA;Erebia euryale;0.93493911427573;  
HM901446;Lepidoptera;Polyommatus eros;NA;0.002;Polyommatus eros;0.987468418234804;

HM901447;Lepidoptera;Pyrgus serratulae;Pyrgus serratulae;1;Pyrgus serratulae;0.999999822628057;  
HM901448;Lepidoptera;Erebia meolans;Erebia meolans;NA;Erebia meolans;0.999835953426128;  
HM901449;Lepidoptera;Erebia euryale;NA;NA;Erebia euryale;0.963541074418532;  
HM901450;Lepidoptera;Erebia euryale;NA;NA;Erebia euryale;0.963541074418532;  
HM901451;Lepidoptera;Melitaea parthenoides;Melitaea parthenoides;1;Melitaea  
parthenoides;0.99999993530452;  
HM901452;Lepidoptera;Melitaea diamina;Melitaea diamina;1;Melitaea diamina;0.999999955078466;  
HM901454;Lepidoptera;Melitaea nevadensis;Melitaea celadussa;1;Melitaea  
celadussa;0.998596140127316;  
HM901455;Lepidoptera;Melitaea deione;Melitaea deione;1;Melitaea deione;0.99999999978741;  
HM901456;Lepidoptera;Melitaea deione;Melitaea deione;1;Melitaea deione;0.99999999985903;  
HM901459;Lepidoptera;Satyrium esculi;Satyrium esculi;1;Satyrium esculi;0.999999957367948;  
HM901461;Lepidoptera;Melitaea trivia;Melitaea trivia;1;Melitaea trivia;0.99999999977604;  
HM901462;Lepidoptera;Callophrys avis;Callophrys avis;1;Callophrys avis;0.992335035373355;  
HM901463;Lepidoptera;Melitaea parthenoides;Melitaea parthenoides;1;Melitaea  
parthenoides;0.99999993530452;  
HM901464;Lepidoptera;Melitaea deione;Melitaea deione;1;Melitaea deione;0.99999999735309;  
HM901465;Lepidoptera;Plebejus argus;Plebejus argus;1;Plebejus argus;0.996068373368906;  
HM901466;Lepidoptera;Satyrium acaciae;Satyrium acaciae;1;Satyrium acaciae;0.99999991343697;  
HM901468;Lepidoptera;Satyrium esculi;Satyrium esculi;1;Satyrium esculi;0.999999957367948;  
HM901469;Lepidoptera;Satyrium acaciae;Satyrium acaciae;1;Satyrium acaciae;0.99999991343697;  
HM901470;Lepidoptera;Melitaea nevadensis;Melitaea celadussa;1;Melitaea  
celadussa;0.998596140127316;  
HM901471;Lepidoptera;Euphydryas aurinia;Euphydryas aurinia;0.02;Euphydryas  
aurinia;0.99668249939786;  
HM901472;Lepidoptera;Satyrium acaciae;Satyrium acaciae;1;Satyrium acaciae;0.999999811388779;  
HM901475;Lepidoptera;Melitaea parthenoides;Melitaea parthenoides;1;Melitaea  
parthenoides;0.99999993530452;  
HM901478;Lepidoptera;Chazara briseis;Chazara briseis;1;Chazara briseis;0.999980393060755;  
HM901481;Lepidoptera;Polyommatus escheri;Polyommatus escheri;1;Polyommatus  
escheri;0.999999989429227;  
HM901485;Lepidoptera;Chazara briseis;Chazara briseis;1;Chazara briseis;0.999980393060755;  
HM901486;Lepidoptera;Gegenes nostrodamus;Gegenes nostrodamus;1;Gegenes  
nostrodamus;0.99999996883645;  
HM901487;Lepidoptera;Melitaea cinxia;Melitaea cinxia;1;Melitaea cinxia;0.99999999999659;  
HM901490;Lepidoptera;Satyrium acaciae;Satyrium acaciae;1;Satyrium acaciae;0.99999991343697;  
HM901491;Lepidoptera;Lycaena alciphron;Lycaena alciphron;1;Lycaena alciphron;0.99999971794291;  
HM901492;Lepidoptera;Brintesia circe;Brintesia circe;NA;Brintesia circe;0.999999752169404;  
HM901494;Lepidoptera;Satyrium esculi;Satyrium esculi;1;Satyrium esculi;0.999999957367948;  
HM901495;Lepidoptera;Thymelicus lineola;Thymelicus lineola;1;Thymelicus  
lineola;0.999999096983497;  
HM901497;Lepidoptera;Erebia euryale;NA;NA;Erebia euryale;0.93493911427573;  
HM901499;Lepidoptera;Erebia epiphron;NA;NA;Erebia epiphron;0.950006471153786;  
HM901502;Lepidoptera;Chazara briseis;Chazara briseis;1;Chazara briseis;0.999982402025926;  
HM901503;Lepidoptera;Erebia neoridas;NA;NA;Erebia neoridas;0.994368810769763;  
HM901504;Lepidoptera;Erebia neoridas;NA;NA;Erebia neoridas;0.994368810769763;  
HM901505;Lepidoptera;Erebia oeme;NA;0.114;Erebia oeme;0.99999999830635;  
HM901507;Lepidoptera;Callophrys rubi;NA;0.001;Callophrys rubi;0.99870518510598;  
HM901508;Lepidoptera;Melitaea didyma;NA;NA;Melitaea didyma;0.981993619455166;  
HM901509;Lepidoptera;Euphydryas aurinia;Euphydryas aurinia;0.017;Euphydryas  
aurinia;0.997183742560994;  
HM901510;Lepidoptera;Euphydryas aurinia;Euphydryas aurinia;0.017;Euphydryas  
aurinia;0.997183742560994;  
HM901511;Lepidoptera;Araschnia levana;Araschnia levana;1;Araschnia levana;0.999999772187832;  
HM901512;Lepidoptera;Fabriciana adippe;Fabriciana adippe;0.001;Fabriciana  
adippe;0.999538788643547;  
HM901513;Lepidoptera;Polyommatus damon;Polyommatus damon;1;Polyommatus damon;0.999999390653429;  
HM901514;Lepidoptera;Coenonympha dorus;Coenonympha dorus;1;Coenonympha dorus;0.9999999988259;  
HM901517;Lepidoptera;Polyommatus dorylas;Polyommatus dorylas;0.025;Polyommatus  
dorylas;0.973229109265438;  
HM901518;Lepidoptera;Lasiommata maera;Lasiommata maera;1;Lasiommata maera;0.999997945450226;  
HM901520;Lepidoptera;Erebia meolans;Erebia meolans;NA;Erebia meolans;0.999866655133868;  
HM901521;Lepidoptera;Polyommatus dorylas;Polyommatus dorylas;0.025;Polyommatus  
dorylas;0.973229109265438;  
HM901522;Lepidoptera;Maniola cecilia;Pyronia cecilia;1;Pyronia cecilia;1;  
HM901523;Lepidoptera;Coenonympha arcania;NA;0.172;Coenonympha arcania;0.963036309473038;  
HM901524;Lepidoptera;Polyommatus dorylas;Polyommatus dorylas;0.025;Polyommatus  
dorylas;0.973229109265438;  
HM901529;Lepidoptera;Hipparchia hermione;Hipparchia hermione;1;Hipparchia  
hermione;0.999958624563657;  
HM901530;Lepidoptera;Arethusana arethusana;Arethusana arethusana;1;Arethusana  
arethusana;0.99999801603556;  
HM901531;Lepidoptera;Arethusana arethusana;Arethusana arethusana;1;Arethusana  
arethusana;0.99998574660502;  
HM901532;Lepidoptera;Cupido minimus;NA;0.216;Cupido lorquini;0.726278995315528;  
HM901533;Lepidoptera;Cupido osiris;Cupido osiris;1;Cupido osiris;0.999999791352473;  
HM901534;Lepidoptera;Cupido osiris;Cupido osiris;1;Cupido osiris;0.999999791352473;  
HM901535;Lepidoptera;Cupido osiris;Cupido osiris;1;Cupido osiris;0.999999791352473;

HM901536;Lepidoptera;Cupido osiris;Cupido osiris;1;Cupido osiris;0.999999791352473;  
HM901539;Lepidoptera;Melitaea nevadensis;Melitaea celadussa;0.997;Melitaea  
celadussa;0.996554884093156;  
HM901543;Lepidoptera;Arethusana arethusa;Arethusana arethusa;1;Arethusana  
arethusa;0.999999801603556;  
HM901544;Lepidoptera;Arethusana arethusa;Arethusana arethusa;1;Arethusana  
arethusa;0.999999801603556;  
HM901546;Lepidoptera;Cupido minimus;NA;0.219;NA;0.999997407214946;  
HM901547;Lepidoptera;Pyrgus armoricanus;Pyrgus armoricanus;0.999;Pyrgus  
armoricanus;0.999972901730941;  
HM901552;Lepidoptera;Colias alfacariensis;Colias alfacariensis;0.001;Colias  
alfacariensis;0.999857790810452;  
HM901553;Lepidoptera;Polyommatus celina;NA;0.072;Polyommatus celina;0.99999999953559;  
HM901554;Lepidoptera;Erebia neoridas;NA;NA;Erebia neoridas;0.994368810769763;  
HM901555;Lepidoptera;Erebia neoridas;NA;NA;Erebia neoridas;0.994368810769763;  
HM901557;Lepidoptera;Colias alfacariensis;Colias alfacariensis;0.001;Colias  
alfacariensis;0.999857790810452;  
HM901558;Lepidoptera;Polyommatus amandus;Polyommatus amandus;0.003;Polyommatus  
amandus;0.999980071833264;  
HM901560;Lepidoptera;Hipparchia hermione;Hipparchia hermione;1;Hipparchia  
hermione;0.999929600232128;  
HM901561;Lepidoptera;Thymelicus lineola;Thymelicus lineola;1;Thymelicus  
lineola;0.999998106572607;  
HM901562;Lepidoptera;Aricia cramera;Aricia cramera;1;Aricia cramera;0.999993731037033;  
HM901563;Lepidoptera;Aricia cramera;Aricia cramera;1;Aricia cramera;0.999993731037033;  
HM901564;Lepidoptera;Coenonympha glycerion;NA;0.28;Coenonympha glycerion;0.999998036263913;  
HM901565;Lepidoptera;Coenonympha glycerion;NA;0.28;Coenonympha glycerion;0.999998036263913;  
HM901566;Lepidoptera;Colias phicomone;Colias phicomone;0.001;Colias phicomone;0.986802434025645;  
HM901569;Lepidoptera;Coenonympha pamphilus;Coenonympha pamphilus;1;Coenonympha  
pamphilus;0.99999999981924;  
HM901573;Lepidoptera;Thymelicus lineola;Thymelicus lineola;1;Thymelicus  
lineola;0.999998787978423;  
HM901574;Lepidoptera;Thymelicus sylvestris;Thymelicus sylvestris;1;Thymelicus  
sylvestris;0.999999985935205;  
HM901584;Lepidoptera;Polyommatus celina;Polyommatus celina;0.009;Polyommatus  
celina;0.99999999949694;  
HM901588;Lepidoptera;Brenthis daphne;Brenthis daphne;0.001;Brenthis daphne;0.997781825264304;  
HM901589;Lepidoptera;Brenthis daphne;Brenthis daphne;0.001;Brenthis daphne;0.997781825264304;  
HM901591;Lepidoptera;Thymelicus lineola;Thymelicus lineola;1;Thymelicus  
lineola;0.999998126710004;  
HM901594;Lepidoptera;Coenonympha pamphilus;Coenonympha pamphilus;1;Coenonympha  
pamphilus;0.9999999999946;  
HM901595;Lepidoptera;Arethusana arethusa;Arethusana arethusa;1;Arethusana  
arethusa;0.999999785474722;  
HM901596;Lepidoptera;Aphantopus hyperantus;Aphantopus hyperantus;0.003;Aphantopus  
hyperantus;0.999999455871523;  
HM901597;Lepidoptera;Polyommatus escheri;Polyommatus escheri;1;Polyommatus  
escheri;0.9999999888855;  
HM901605;Lepidoptera;Aglais urticae;Aglais urticae;0.004;Aglais urticae;0.995016750255472;  
HM901607;Lepidoptera;Pararge aegeria;Pararge aegeria;1;Pararge aegeria;0.99999999963165;  
HM901608;Lepidoptera;Aricia cramera;Aricia cramera;1;Aricia cramera;0.999993731037033;  
HM901611;Lepidoptera;Aricia cramera;Aricia cramera;1;Aricia cramera;0.999993731037033;  
HM901613;Lepidoptera;Hipparchia hermione;Hipparchia hermione;1;Hipparchia  
hermione;0.999958624563657;  
HM901615;Lepidoptera;Colias alfacariensis;Colias alfacariensis;0.001;Colias  
alfacariensis;0.999857790810452;  
HM901616;Lepidoptera;Colias alfacariensis;Colias alfacariensis;0.001;Colias  
alfacariensis;0.999857790810452;  
HM901619;Lepidoptera;Brenthis daphne;Brenthis daphne;1;Brenthis daphne;0.997172799742872;  
HM901620;Lepidoptera;Limenitis camilla;Limenitis camilla;0.009;Limenitis  
camilla;0.9999828626808;  
HM901624;Lepidoptera;Aglais urticae;NA;0.002;Aglais urticae;0.987497593219019;  
HM901626;Lepidoptera;Coenonympha glycerion;NA;0.156;Coenonympha glycerion;0.999998559347134;  
HM901627;Lepidoptera;Coenonympha glycerion;NA;0.284;Coenonympha glycerion;0.999998676061348;  
HM901628;Lepidoptera;Cyathodonta semiargus;NA;NA;Cyathodonta semiargus;0.999051841766953;  
HM901629;Lepidoptera;Polyommatus escheri;Polyommatus escheri;1;Polyommatus  
escheri;0.99999998501636;  
HM901630;Lepidoptera;Polyommatus escheri;Polyommatus escheri;1;Polyommatus  
escheri;0.999998281574049;  
HM901634;Lepidoptera;Coenonympha glycerion;NA;0.157;Coenonympha glycerion;0.999999004304256;  
HM901636;Lepidoptera;Brenthis daphne;Brenthis daphne;0.001;Brenthis daphne;0.997781825264304;  
HM901637;Lepidoptera;Aglais urticae;NA;0.002;Aglais urticae;0.987497593219019;  
HM901638;Lepidoptera;Pyrgus serratulae;Pyrgus serratulae;1;Pyrgus serratulae;0.999999694697398;  
HM901639;Lepidoptera;Polyommatus escheri;Polyommatus escheri;1;Polyommatus  
escheri;0.99999335270609;  
HM901640;Lepidoptera;Polyommatus escheri;Polyommatus escheri;1;Polyommatus  
escheri;0.999980529280732;

HM901642;Lepidoptera;Thymelicus lineola;Thymelicus lineola;1;Thymelicus lineola;0.999999096983497;  
HM901643;Lepidoptera;Pyrgus serratulae;Pyrgus serratulae;1;Pyrgus serratulae;0.999999694697398;  
HM901644;Lepidoptera;Aphantopus hyperantus;Aphantopus hyperantus;0.003;Aphantopus hyperantus;0.999999455871523;  
HM901645;Lepidoptera;Coenonympha glycerion;NA;0.406;Coenonympha glycerion;0.99999824609387;  
HM901646;Lepidoptera;Pararge aegeria;Pararge aegeria;1;Pararge aegeria;0.99999999365514;  
HM901647;Lepidoptera;Polyommatus celina;Polyommatus celina;0.001;Polyommatus celina;0.99999999717033;  
HM901648;Lepidoptera;Pararge aegeria;Pararge aegeria;1;Pararge aegeria;0.99999999365514;  
HM901649;Lepidoptera;Polyommatus celina;Polyommatus celina;0.001;Polyommatus celina;0.99999999717033;  
HM901650;Lepidoptera;Aphantopus hyperantus;Aphantopus hyperantus;0.006;Aphantopus hyperantus;0.999998615504572;  
HM901651;Lepidoptera;Arethusana arethusana;Arethusana arethusana;0.003;Arethusana arethusana;0.999976174545094;  
HM901652;Lepidoptera;Arethusana arethusana;Arethusana arethusana;0.001;Arethusana arethusana;0.999978196934222;  
HM901660;Lepidoptera;Lysandra coridon;Lysandra coridon;NA;Lysandra coridon;0.878290303545515;  
HM901661;Lepidoptera;Lysandra coridon;Lysandra coridon;NA;Lysandra coridon;0.892412957467058;  
HM901665;Lepidoptera;Arethusana arethusana;NA;0.062;Arethusana arethusana;0.999962489703143;  
HM901666;Lepidoptera;Pararge aegeria;Pararge aegeria;1;Pararge aegeria;0.99999999963165;  
HM901667;Lepidoptera;Cupido minimus;NA;0.009;Cupido minimus;0.999791453712643;  
HM901668;Lepidoptera;Cupido minimus;NA;0.009;Cupido minimus;0.999791453712643;  
HM901671;Lepidoptera;Thymelicus lineola;Thymelicus lineola;1;Thymelicus lineola;0.999998231984392;  
HM901673;Lepidoptera;Aphantopus hyperantus;Aphantopus hyperantus;0.006;Aphantopus hyperantus;0.999998615504572;  
HM901674;Lepidoptera;Aphantopus hyperantus;Aphantopus hyperantus;0.006;Aphantopus hyperantus;0.999998615504572;  
HM901677;Lepidoptera;Hipparchia hermione;Hipparchia hermione;1;Hipparchia hermione;0.999791304970896;  
HM901682;Lepidoptera;Aphantopus hyperantus;Aphantopus hyperantus;0.003;Aphantopus hyperantus;0.99999864068927;  
HM901686;Lepidoptera;Agriades glandon;NA;NA;Agriades glandon;0.986958609491942;  
HM901687;Lepidoptera;Colias phicomone;Colias phicomone;0.001;Colias phicomone;0.986802434025645;  
HM901688;Lepidoptera;Colias phicomone;Colias phicomone;0.001;Colias phicomone;0.986802434025645;  
HM901697;Lepidoptera;Pararge aegeria;Pararge aegeria;1;Pararge aegeria;0.99999999963165;  
HM901698;Lepidoptera;Coenonympha pamphilus;Coenonympha pamphilus;1;Coenonympha pamphilus;0.99999999999829;  
HM901699;Lepidoptera;Cupido minimus;NA;0.009;Cupido minimus;0.999791453712643;  
HM901700;Lepidoptera;Cupido minimus;NA;0.009;Cupido minimus;0.999791453712643;  
HM901701;Lepidoptera;Limenitis camilla;Limenitis camilla;0.009;Limenitis camilla;0.9999828626808;  
HM901702;Lepidoptera;Colias phicomone;Colias phicomone;0.001;Colias phicomone;0.986802434025645;  
HM901703;Lepidoptera;Colias phicomone;Colias phicomone;0.001;Colias phicomone;0.986802434025645;  
HM901704;Lepidoptera;Brenthis ino;Brenthis ino;0.001;Brenthis ino;0.993162660176952;  
HM901710;Lepidoptera;Erebia pronoe;Erebia pronoe;1;Erebia pronoe;0.997847273843868;  
HM901711;Lepidoptera;Erebia pronoe;Erebia pronoe;1;Erebia pronoe;0.997847273843868;  
HM901712;Lepidoptera;Apatura ilia;NA;0.031;Apatura ilia;0.977379808055049;  
HM901713;Lepidoptera;Apatura iris;Apatura iris;1;Apatura iris;0.99999999999972;  
HM901714;Lepidoptera;Apatura ilia;Apatura ilia;NA;Apatura ilia;0.988792300608896;  
HM901717;Lepidoptera;Colias phicomone;NA;0.064;Colias phicomone;0.992122721786916;  
HM901718;Lepidoptera;Colias phicomone;NA;0.064;Colias phicomone;0.992122721786916;  
HM901719;Lepidoptera;Boloria euphrosyne;Boloria euphrosyne;1;Boloria euphrosyne;0.999996593742825;  
HM901720;Lepidoptera;Boloria euphrosyne;Boloria euphrosyne;1;Boloria euphrosyne;0.999996593742825;  
HM901726;Lepidoptera;Fabriciana niobe;NA;0.035;Fabriciana niobe;0.949480222958778;  
HM901734;Lepidoptera;Hipparchia hermione;Hipparchia hermione;1;Hipparchia hermione;0.999923234126642;  
HM901740;Lepidoptera;Polyommatus escheri;Polyommatus escheri;1;Polyommatus escheri;0.999999997780122;  
HM901744;Lepidoptera;Coenonympha pamphilus;Coenonympha pamphilus;1;Coenonympha pamphilus;0.99999999999744;  
HM901746;Lepidoptera;Polyommatus amandus;Polyommatus amandus;0.003;Polyommatus amandus;0.999980071833264;  
HM901747;Lepidoptera;Boloria euphrosyne;Boloria euphrosyne;0.008;Boloria euphrosyne;0.999964281413411;  
HM901749;Lepidoptera;Limenitis camilla;Limenitis camilla;0.009;Limenitis camilla;0.9999828626808;  
HM901750;Lepidoptera;Aphantopus hyperantus;Aphantopus hyperantus;0.003;Aphantopus hyperantus;0.999999455871523;  
HM901751;Lepidoptera;Limenitis camilla;Limenitis camilla;0.009;Limenitis camilla;0.9999828626808;  
HM901756;Lepidoptera;Brenthis ino;NA;0.061;Brenthis ino;0.791997215074462;  
HM901757;Lepidoptera;Apatura iris;Apatura iris;1;Apatura iris;0.999999999999972;

HM901762;Lepidoptera;Polyommatus escheri;Polyommatus escheri;1;Polyommatus escheri;0.99999996684522;  
HM901763;Lepidoptera;Polyommatus escheri;Polyommatus escheri;1;Polyommatus escheri;0.99999996299948;  
HM901764;Lepidoptera;Fabriciana adippe;Fabriciana adippe;1;Fabriciana adippe;0.999486158851074;  
HM901766;Lepidoptera;Satyrium esculi;Satyrium esculi;1;Satyrium esculi;0.999999957367948;  
HM901767;Lepidoptera;Coenonympha glycerion;NA;0.28;Coenonympha glycerion;0.999998036263913;  
HM901768;Lepidoptera;Brenthis ino;Brenthis ino;0.001;Brenthis ino;0.998434780405276;  
HM901769;Lepidoptera;Coenonympha glycerion;NA;0.28;Coenonympha glycerion;0.999998036263913;  
HM901770;Lepidoptera;Carcharodus lavatherae;Carcharodus lavatherae;1;Carcharodus lavatherae;0.999975293871709;  
HM901771;Lepidoptera;Thymelicus sylvestris;Thymelicus sylvestris;1;Thymelicus sylvestris;0.99999985935205;  
HM901773;Lepidoptera;Thymelicus sylvestris;Thymelicus sylvestris;1;Thymelicus sylvestris;0.99999985935205;  
HM901778;Lepidoptera;Iolana iolas;Iolana iolas;1;Iolana iolas;0.999999158433083;  
HM901779;Lepidoptera;Arethusana arethusa;NA;0.062;Arethusana arethusa;0.999962489703143;  
HM901780;Lepidoptera;Pararge aegeria;Pararge aegeria;1;Pararge aegeria;0.999999775819728;  
HM901781;Lepidoptera;Boloria euphrosyne;Boloria euphrosyne;0.003;Boloria euphrosyne;0.999970094877776;  
HM901782;Lepidoptera;Boloria pales;Boloria pales;1;Boloria pales;0.99847060885702;  
HM901783;Lepidoptera;Erebia pronoe;Erebia pronoe;1;Erebia pronoe;0.99980482908169;  
HM901784;Lepidoptera;Erebia pronoe;Erebia pronoe;1;Erebia pronoe;0.99954644749081;  
HM901785;Lepidoptera;Erebia pronoe;Erebia pronoe;1;Erebia pronoe;0.99980482908169;  
HM901786;Lepidoptera;Erebia pronoe;Erebia pronoe;1;Erebia pronoe;0.99980482908169;  
HM901787;Lepidoptera;Erebia pronoe;Erebia pronoe;1;Erebia pronoe;0.99980482908169;  
HM901791;Lepidoptera;Lysandra coridon;Lysandra coridon;NA;NA;0.999914532655271;  
HM901792;Lepidoptera;Arethusana arethusa;NA;0.062;Arethusana arethusa;0.999953862792797;  
HM901793;Lepidoptera;Aglais urticae;Aglais urticae;1;Aglais urticae;0.995854684772509;  
HM901795;Lepidoptera;Hipparchia hermione;Hipparchia hermione;1;Hipparchia hermione;0.999941679724737;  
HM901799;Lepidoptera;Aglais urticae;NA;0.002;Aglais urticae;0.987497593219019;  
HM901802;Lepidoptera;Brenthis ino;Brenthis ino;0.002;Brenthis ino;0.984749809551735;  
HM901804;Lepidoptera;Carcharodus baeticus;Carcharodus baeticus;1;Carcharodus baeticus;0.999983899664537;  
HM901805;Lepidoptera;Pyrgus serratulae;Pyrgus serratulae;1;Pyrgus serratulae;0.999999877361184;  
HM901806;Lepidoptera;Pyrgus serratulae;Pyrgus serratulae;1;Pyrgus serratulae;0.999999877361184;  
HM901809;Lepidoptera;Melitaea didyma;Melitaea didyma;NA;Melitaea didyma;0.980272836986251;  
HM901810;Lepidoptera;Melitaea didyma;Melitaea didyma;NA;Melitaea didyma;0.980272836986251;  
HM901811;Lepidoptera;Carcharodus baeticus;Carcharodus baeticus;1;Carcharodus baeticus;0.999956286218202;  
HM901812;Lepidoptera;Erebia neoridas;NA;NA;Erebia neoridas;0.994368810769763;  
HM901813;Lepidoptera;Erebia neoridas;NA;NA;Erebia neoridas;0.994368810769763;  
HM901814;Lepidoptera;Erebia neoridas;NA;NA;Erebia neoridas;0.994368810769763;  
HM901815;Lepidoptera;Erebia neoridas;NA;NA;Erebia neoridas;0.997677227800323;  
HM901816;Lepidoptera;Erebia neoridas;NA;NA;Erebia neoridas;0.996460951256266;  
HM901817;Lepidoptera;Colias phicomone;Colias phicomone;0.001;Colias phicomone;0.986802434025645;  
HM901818;Lepidoptera;Colias phicomone;Colias phicomone;0.029;Colias phicomone;0.960754705901041;  
HM901819;Lepidoptera;Colias phicomone;Colias phicomone;0.001;Colias phicomone;0.986802434025645;  
HM901820;Lepidoptera;Melitaea parthenoides;Melitaea parthenoides;1;Melitaea parthenoides;0.999998904055136;  
HM901821;Lepidoptera;Melitaea diamina;NA;0.149;Melitaea diamina;0.999999996592464;  
HM901822;Lepidoptera;Coenonympha dorus;Coenonympha dorus;1;Coenonympha dorus;0.9999999988259;  
HM901824;Lepidoptera;Carcharodus baeticus;Carcharodus baeticus;1;Carcharodus baeticus;0.999983899664537;  
HM901825;Lepidoptera;Melitaea didyma;Melitaea didyma;1;Melitaea didyma;0.987834979325531;  
HM901826;Lepidoptera;Chazara briseis;Chazara briseis;0.001;Chazara briseis;0.999986616075242;  
HM901827;Lepidoptera;Charaxes jasius;Charaxes jasius;NA;Charaxes jasius;0.995860724722804;  
HM901828;Lepidoptera;Charaxes jasius;Charaxes jasius;0.001;Charaxes jasius;0.997689374666591;  
HM901829;Lepidoptera;Erebia oeme;NA;0.114;Erebia oeme;0.99999999830635;  
HM901830;Lepidoptera;Erebia oeme;NA;0.12;Erebia oeme;0.99999999885944;  
HM901833;Lepidoptera;Thymelicus sylvestris;NA;0.324;Thymelicus sylvestris;0.999940778442454;  
HM901834;Lepidoptera;Melitaea parthenoides;Melitaea parthenoides;1;Melitaea parthenoides;0.999999426287269;  
HM902067;Lepidoptera;Minois dryas;Minois dryas;0.007;Minois dryas;0.948207146728008;  
HM902068;Lepidoptera;Brintesia circe;Brintesia circe;1;Brintesia circe;0.999998969116339;  
HM902070;Lepidoptera;Erebia euryale;NA;NA;Erebia euryale;0.919518760623792;  
HM903321;Lepidoptera;Aricia agestis;NA;NA;Aricia agestis;0.979669910324124;  
HM904288;Lepidoptera;Melitaea didyma;Melitaea didyma;1;Melitaea didyma;0.999391232011314;  
HM904290;Lepidoptera;Coenonympha pamphilus;Coenonympha pamphilus;1;Coenonympha pamphilus;0.99999999999744;  
HM904291;Lepidoptera;Ochlodes sylvanus;NA;0.119;Ochlodes sylvanus;0.997373902608318;  
HM904293;Lepidoptera;Coenonympha pamphilus;Coenonympha pamphilus;1;Coenonympha pamphilus;0.99999999997954;  
HM904298;Lepidoptera;Vanessa cardui;Vanessa cardui;1;Vanessa cardui;0.999999459983318;  
HM904299;Lepidoptera;Lysandra coridon;Lysandra coridon;NA;NA;0.999039865644651;  
HM904301;Lepidoptera;Cupido argiades;NA;0.499;NA;0.99999999984682;  
HM904305;Lepidoptera;Cupido alcetas;NA;0.207;Cupido alcetas;0.841248270372301;

HM904306;Lepidoptera;Cupido argiades;NA;NA;NA;0.999999999855364;  
HM904308;Lepidoptera;Brintesia circe;Brintesia circe;1;Brintesia circe;0.99999951254154;  
HM904309;Lepidoptera;Vanessa atalanta;Vanessa atalanta;1;Vanessa atalanta;0.999999999757762;  
HM904310;Lepidoptera;Colias alfacariensis;Colias alfacariensis;0.001;Colias alfacariensis;0.999926026317526;  
HM904312;Lepidoptera;Colias crocea;NA;NA;NA;0.999999999999491;  
HM904315;Lepidoptera;Maniola jurtina;NA;0.038;NA;0.99999999999524;  
HM904316;Lepidoptera;Pieris napi;NA;0.011;Pieris napi;0.801985394724814;  
HM909999;Lepidoptera;Colias alfacariensis;Colias alfacariensis;1;Colias alfacariensis;0.999944653442302;  
HM910000;Lepidoptera;Colias alfacariensis;Colias alfacariensis;1;Colias alfacariensis;0.999944653442302;  
HM910001;Lepidoptera;Colias alfacariensis;Colias alfacariensis;1;Colias alfacariensis;0.999944653442302;  
HM910002;Lepidoptera;Colias alfacariensis;Colias alfacariensis;1;Colias alfacariensis;0.999944653442302;  
HM910004;Lepidoptera;Parnassius mnemosyne;Parnassius mnemosyne;1;Parnassius mnemosyne;0.99999688766982;  
HM910006;Lepidoptera;Lasiommata maera;Lasiommata maera;1;Lasiommata maera;0.99999942908402;  
HM910007;Lepidoptera;Pararge aegeria;Pararge aegeria;1;Pararge aegeria;0.999999999963165;  
HM910008;Lepidoptera;Coenonympha arcania;NA;0.067;Coenonympha arcania;0.978811371852141;  
HM910010;Lepidoptera;Coenonympha glycerion;NA;0.28;Coenonympha glycerion;0.999998036263913;  
HM910012;Lepidoptera;Coenonympha glycerion;NA;0.104;Coenonympha glycerion;0.999997457415382;  
HM910014;Lepidoptera;Minois dryas;NA;0.025;Minois dryas;0.850746026247397;  
HM910015;Lepidoptera;Minois dryas;NA;0.025;Minois dryas;0.850746026247397;  
HM910019;Lepidoptera;Pyrgus alveus;NA;NA;NA;0.999999999995496;  
HM910498;Lepidoptera;Papilio machaon;Papilio machaon;NA;Papilio machaon;0.99889956649962;  
HM910501;Lepidoptera;Anthocharis cardamines;Anthocharis cardamines;1;Anthocharis cardamines;0.999999988033608;  
HM910506;Lepidoptera;Aporia crataegi;NA;NA;Aporia crataegi;0.999998459680561;  
HM910507;Lepidoptera;Gonepteryx rhamni;Gonepteryx rhamni;1;Gonepteryx rhamni;0.999673119534565;  
HM910510;Lepidoptera;Melitaea trivia;Melitaea trivia;1;Melitaea trivia;0.999999999955975;  
HM910511;Lepidoptera;Melitaea didyma;Melitaea didyma;1;Melitaea didyma;0.999870115406424;  
HM910512;Lepidoptera;Melitaea cinxia;Melitaea cinxia;1;Melitaea cinxia;0.99999999999631;  
HM910514;Lepidoptera;Melitaea nevadensis;NA;0.005;Melitaea celadussa;0.873944840950458;  
HM910573;Lepidoptera;Issoria lathonia;Issoria lathonia;1;Issoria lathonia;0.999999999989257;  
HM910574;Lepidoptera;Lysandra coridon;Lysandra coridon;NA;NA;0.999039865644651;  
HM910579;Lepidoptera;Vanessa atalanta;Vanessa atalanta;1;Vanessa atalanta;0.999999999746649;  
HM910580;Lepidoptera;Fabriciana adippe;NA;NA;Fabriciana adippe;0.922280384106682;  
HM910581;Lepidoptera;Hipparchia semele;NA;0.002;Hipparchia semele;0.887078465943553;  
HM910583;Lepidoptera;Chazara briseis;Chazara briseis;0.001;Chazara briseis;0.999984130678865;  
HM910594;Lepidoptera;Pieris napi;NA;0.011;Pieris napi;0.801985394724814;  
HM910600;Lepidoptera;Maniola cecilia;Pyronia cecilia;1;Pyronia cecilia;0.999999999998863;  
HM913938;Lepidoptera;Boloria euphrosyne;Boloria euphrosyne;1;Boloria euphrosyne;0.999999910115296;  
HM913939;Lepidoptera;Issoria lathonia;Issoria lathonia;1;Issoria lathonia;0.999999999989257;  
HM913940;Lepidoptera;Fabriciana adippe;NA;NA;Fabriciana adippe;0.922280384106682;  
HM913943;Lepidoptera;Nymphalis egea;Polygonia egea;1;Polygonia egea;0.999999758078475;  
HM913944;Lepidoptera;Nymphalis c-album;NA;0.08;NA;0.999996025433302;  
HM913946;Lepidoptera;Pararge aegeria;Pararge aegeria;1;Pararge aegeria;0.999999999963165;  
HM913947;Lepidoptera;Lasiommata megera;Lasiommata megera;1;Lasiommata megera;0.999498474862377;  
HM913948;Lepidoptera;Lasiommata maera;Lasiommata maera;1;Lasiommata maera;0.99999510792253;  
HM913950;Lepidoptera;Maniola cecilia;Pyronia cecilia;1;Pyronia cecilia;1;  
HM913951;Lepidoptera;Chazara briseis;Chazara briseis;0.001;Chazara briseis;0.999984130678865;  
HM913952;Lepidoptera;Hipparchia semele;NA;NA;Hipparchia semele;0.748345401572611;  
HM913953;Lepidoptera;Lycaena tityrus;Lycaena tityrus;1;Lycaena tityrus;0.999998928238034;  
HM913954;Lepidoptera;Lycaena phlaeas;Lycaena phlaeas;1;Lycaena phlaeas;0.99999999060276;  
HM913955;Lepidoptera;Satyrium ilicis;Satyrium ilicis;1;Satyrium ilicis;0.999999987901305;  
HM913956;Lepidoptera;Callophrys rubi;Callophrys rubi;0.007;Callophrys rubi;0.99851401092179;  
HM913958;Lepidoptera;Lampides boeticus;Lampides boeticus;1;Lampides boeticus;0.999999999545906;  
HM913959;Lepidoptera;Cupido alcetas;NA;0.218;Cupido alcetas;0.833501983138177;  
HM913960;Lepidoptera;Cupido alcetas;NA;0.218;Cupido alcetas;0.833501983138177;  
HM913961;Lepidoptera;Cupido minimus;NA;0.009;Cupido minimus;0.999791453712643;  
HM913963;Lepidoptera;Glaucopsyche alexis;Glaucopsyche alexis;0.001;Glaucopsyche alexis;0.94042380088325;  
HM913964;Lepidoptera;Plebejus argyrognomon;NA;0.001;NA;0.998518811781132;  
HM913965;Lepidoptera;Plebejus argyrognomon;NA;0.001;NA;0.998518811781132;  
HM913966;Lepidoptera;Aricia agestis;NA;0.253;Aricia agestis;0.996350017387504;  
HM913967;Lepidoptera;Aricia agestis;NA;NA;Aricia agestis;0.993980512246517;  
HM913969;Lepidoptera;Polyommatus amandus;Polyommatus amandus;0.002;Polyommatus amandus;0.99998879592523;  
HM913970;Lepidoptera;Hamearis lucina;NA;NA;Hamearis lucina;0.999999999984141;  
HM913973;Lepidoptera;Pyrgus onopordi;Pyrgus onopordi;1;Pyrgus onopordi;0.999997111229755;  
HM913974;Lepidoptera;Pyrgus carthami;Pyrgus carthami;1;Pyrgus carthami;0.999999568765909;  
HM913975;Lepidoptera;Pyrgus armoricanus;Pyrgus armoricanus;1;Pyrgus armoricanus;0.999997353848817;  
HM913977;Lepidoptera;Thymelicus sylvestris;Thymelicus sylvestris;1;Thymelicus sylvestris;0.999999981568351;

HM913978;Lepidoptera;Thymelicus sylvestris;Thymelicus sylvestris;1;Thymelicus sylvestris;0.999999981568351;  
HM913979;Lepidoptera;Ochlodes sylvanus;NA;0.316;Ochlodes sylvanus;0.996318754838625;  
HM913980;Lepidoptera;Thymelicus acteon;Thymelicus acteon;1;Thymelicus acteon;0.99999999752248;  
HM913982;Lepidoptera;Gegenes pumilio;Gegenes pumilio;1;Gegenes pumilio;0.999986726679266;  
HMYZ021-19;Lepidoptera;Pieris rapae;NA;0.22;Pieris rapae;0.999885170635921;  
HQ003947;Lepidoptera;Aglais urticae;NA;0.002;Aglais urticae;0.987497593219019;  
HQ003948;Lepidoptera;Aglais urticae;NA;NA;Aglais urticae;0.924150107699752;  
HQ003949;Lepidoptera;Aglais urticae;Aglais urticae;0.006;Aglais urticae;0.994059189651409;  
HQ003950;Lepidoptera;Aglais urticae;NA;0.002;Aglais urticae;0.987497593219019;  
HQ003951;Lepidoptera;Aglais urticae;Aglais urticae;0.001;Aglais urticae;0.990690600684087;  
HQ003952;Lepidoptera;Aglais urticae;NA;0.002;Aglais urticae;0.987497593219019;  
HQ003954;Lepidoptera;Anthocharis cardamines;Anthocharis cardamines;1;Anthocharis cardamines;0.999999940675226;  
HQ003955;Lepidoptera;Anthocharis cardamines;Anthocharis cardamines;1;Anthocharis cardamines;0.999999940675226;  
HQ003956;Lepidoptera;Anthocharis cardamines;Anthocharis cardamines;1;Anthocharis cardamines;0.999999936991374;  
HQ003957;Lepidoptera;Anthocharis cardamines;Anthocharis cardamines;1;Anthocharis cardamines;0.999999940675226;  
HQ003958;Lepidoptera;Anthocharis cardamines;Anthocharis cardamines;1;Anthocharis cardamines;0.999999948434409;  
HQ003959;Lepidoptera;Anthocharis cardamines;Anthocharis cardamines;1;Anthocharis cardamines;0.999999940675226;  
HQ003960;Lepidoptera;Anthocharis cardamines;Anthocharis cardamines;1;Anthocharis cardamines;0.999999979606855;  
HQ003961;Lepidoptera;Anthocharis cardamines;Anthocharis cardamines;1;Anthocharis cardamines;0.999999940675226;  
HQ003962;Lepidoptera;Anthocharis cardamines;Anthocharis cardamines;1;Anthocharis cardamines;0.999999951917603;  
HQ003963;Lepidoptera;Apatura ilia;NA;0.039;Apatura ilia;0.977274423026401;  
HQ003964;Lepidoptera;Apatura ilia;NA;0.165;Apatura ilia;0.956796812031481;  
HQ003965;Lepidoptera;Apatura ilia;NA;0.165;Apatura ilia;0.956796812031481;  
HQ003966;Lepidoptera;Apatura ilia;NA;0.243;Apatura ilia;0.940982441998145;  
HQ003967;Lepidoptera;Apatura ilia;NA;0.165;Apatura ilia;0.956796812031481;  
HQ003968;Lepidoptera;Apatura iris;Apatura iris;1;Apatura iris;0.999999999999915;  
HQ003969;Lepidoptera;Apatura iris;Apatura iris;1;Apatura iris;0.999999999999943;  
HQ003970;Lepidoptera;Apatura iris;Apatura iris;1;Apatura iris;0.999999999999943;  
HQ003971;Lepidoptera;Apatura iris;Apatura iris;1;Apatura iris;0.999999999999915;  
HQ003972;Lepidoptera;Apatura iris;Apatura iris;1;Apatura iris;0.999999999999943;  
HQ003973;Lepidoptera;Apatura iris;Apatura iris;1;Apatura iris;0.999999999999631;  
HQ003974;Lepidoptera;Apatura iris;Apatura iris;1;Apatura iris;0.999999999999943;  
HQ003980;Lepidoptera;Aphantopus hyperantus;Aphantopus hyperantus;0.006;Aphantopus hyperantus;0.999998615504572;  
HQ003981;Lepidoptera;Aphantopus hyperantus;Aphantopus hyperantus;0.003;Aphantopus hyperantus;0.999999455871523;  
HQ003982;Lepidoptera;Aphantopus hyperantus;Aphantopus hyperantus;0.003;Aphantopus hyperantus;0.999999455871523;  
HQ003983;Lepidoptera;Aphantopus hyperantus;Aphantopus hyperantus;0.003;Aphantopus hyperantus;0.999999455871523;  
HQ003984;Lepidoptera;Aphantopus hyperantus;Aphantopus hyperantus;0.003;Aphantopus hyperantus;0.999999455871523;  
HQ003985;Lepidoptera;Aphantopus hyperantus;Aphantopus hyperantus;0.002;Aphantopus hyperantus;0.999999020907804;  
HQ003986;Lepidoptera;Aphantopus hyperantus;Aphantopus hyperantus;0.003;Aphantopus hyperantus;0.999999455871523;  
HQ003987;Lepidoptera;Aporia crataegi;NA;0.074;Aporia crataegi;0.999879638454693;  
HQ003988;Lepidoptera;Aporia crataegi;NA;NA;Aporia crataegi;0.999996899001592;  
HQ003989;Lepidoptera;Aporia crataegi;NA;NA;Aporia crataegi;0.999996781126733;  
HQ003990;Lepidoptera;Aporia crataegi;NA;NA;Aporia crataegi;0.999996781126733;  
HQ003991;Lepidoptera;Aporia crataegi;NA;NA;Aporia crataegi;0.999996781126733;  
HQ003992;Lepidoptera;Aporia crataegi;NA;0.002;Aporia crataegi;0.999995898341125;  
HQ003993;Lepidoptera;Aporia crataegi;NA;NA;Aporia crataegi;0.999996781126733;  
HQ003994;Lepidoptera;Araschnia levana;Araschnia levana;1;Araschnia levana;0.999999772187832;  
HQ003995;Lepidoptera;Araschnia levana;Araschnia levana;1;Araschnia levana;0.999999772187832;  
HQ003996;Lepidoptera;Araschnia levana;Araschnia levana;1;Araschnia levana;0.999999772187832;  
HQ003997;Lepidoptera;Araschnia levana;Araschnia levana;1;Araschnia levana;0.999999772187832;  
HQ003998;Lepidoptera;Araschnia levana;Araschnia levana;1;Araschnia levana;0.999999772187832;  
HQ003999;Lepidoptera;Araschnia levana;Araschnia levana;1;Araschnia levana;0.999999772187832;  
HQ004000;Lepidoptera;Araschnia levana;Araschnia levana;1;Araschnia levana;0.999999734047783;  
HQ004001;Lepidoptera;Arethusana arethusana;NA;0.153;Arethusana arethusana;0.999652039046744;  
HQ004002;Lepidoptera;Arethusana arethusana;Arethusana arethusana;0.026;Arethusana arethusana;0.999926983375418;  
HQ004003;Lepidoptera;Arethusana arethusana;NA;0.153;Arethusana arethusana;0.999652039046744;  
HQ004004;Lepidoptera;Arethusana arethusana;Arethusana arethusana;0.024;Arethusana arethusana;0.999978283522486;  
HQ004005;Lepidoptera;Arethusana arethusana;NA;0.153;Arethusana arethusana;0.999652039046744;  
HQ004006;Lepidoptera;Arethusana arethusana;NA;0.153;Arethusana arethusana;0.999652039046744;

HQ004007;Lepidoptera;Arethusana arethusana;NA;0.153;Arethusana arethusana;0.999652039046744;  
HQ004008;Lepidoptera;Arethusana arethusana;Arethusana arethusana;0.023;Arethusana  
arethusana;0.999971494862782;  
HQ004009;Lepidoptera;Fabriciana adippe;Fabriciana adippe;0.012;Fabriciana  
adippe;0.987124560355947;  
HQ004010;Lepidoptera;Fabriciana adippe;Fabriciana adippe;0.003;Fabriciana  
adippe;0.993461634804659;  
HQ004011;Lepidoptera;Fabriciana adippe;Fabriciana adippe;0.002;Fabriciana  
adippe;0.995619139154349;  
HQ004012;Lepidoptera;Fabriciana adippe;NA;NA;Fabriciana adippe;0.98103293393153;  
HQ004013;Lepidoptera;Fabriciana adippe;Fabriciana adippe;0.012;Fabriciana  
adippe;0.987124560355947;  
HQ004014;Lepidoptera;Fabriciana adippe;Fabriciana adippe;NA;Fabriciana adippe;0.98186989364118;  
HQ004015;Lepidoptera;Argynnis aglaja;NA;0.001;NA;0.999999999999586;  
HQ004016;Lepidoptera;Argynnis aglaja;NA;NA;Speyeria aglaja;0.872991147917853;  
HQ004017;Lepidoptera;Argynnis aglaja;NA;0.001;NA;0.999999999999586;  
HQ004018;Lepidoptera;Argynnis aglaja;NA;NA;Speyeria aglaja;0.872991147917853;  
HQ004019;Lepidoptera;Argynnis aglaja;NA;0.004;Speyeria aglaja;0.785084763582602;  
HQ004020;Lepidoptera;Argynnis aglaja;NA;0.004;Speyeria aglaja;0.785084763582602;  
HQ004021;Lepidoptera;Argynnis aglaja;NA;0.001;NA;0.999999999999586;  
HQ004026;Lepidoptera;Fabriciana niobe;NA;0.005;Fabriciana niobe;0.992125835358755;  
HQ004027;Lepidoptera;Fabriciana niobe;NA;0.002;Fabriciana niobe;0.977304369806308;  
HQ004028;Lepidoptera;Fabriciana niobe;Fabriciana niobe;0.001;Fabriciana niobe;0.985635797870942;  
HQ004029;Lepidoptera;Fabriciana niobe;NA;0.001;Fabriciana niobe;0.977553955749008;  
HQ004030;Lepidoptera;Fabriciana niobe;Fabriciana niobe;0.001;Fabriciana niobe;0.985635797870942;  
HQ004031;Lepidoptera;Fabriciana niobe;NA;0.005;Fabriciana niobe;0.992125835358755;  
HQ004032;Lepidoptera;Fabriciana niobe;NA;0.007;Fabriciana niobe;0.984627988609443;  
HQ004044;Lepidoptera;Argynnis paphia;Argynnis paphia;1;Argynnis paphia;0.999999992110673;  
HQ004045;Lepidoptera;Aricia agestis;NA;0.081;Aricia agestis;0.998857812762894;  
HQ004046;Lepidoptera;Aricia agestis;NA;0.081;Aricia agestis;0.998857812762894;  
HQ004047;Lepidoptera;Aricia agestis;NA;0.081;Aricia agestis;0.998857812762894;  
HQ004048;Lepidoptera;Aricia agestis;NA;0.067;Aricia agestis;0.999509743227786;  
HQ004049;Lepidoptera;Aricia agestis;NA;0.081;Aricia agestis;0.998857812762894;  
HQ004050;Lepidoptera;Aricia agestis;NA;0.081;Aricia agestis;0.998857812762894;  
HQ004051;Lepidoptera;Aricia agestis;NA;0.081;Aricia agestis;0.998857812762894;  
HQ004052;Lepidoptera;Aricia agestis;NA;0.067;Aricia agestis;0.999509743227786;  
HQ004053;Lepidoptera;Aricia agestis;NA;0.081;Aricia agestis;0.998857812762894;  
HQ004054;Lepidoptera;Aricia agestis;NA;0.081;Aricia agestis;0.998857812762894;  
HQ004055;Lepidoptera;Aricia agestis;NA;0.03;Aricia agestis;0.998027685685265;  
HQ004056;Lepidoptera;Aricia agestis;NA;0.039;Aricia agestis;0.99882588429926;  
HQ004057;Lepidoptera;Aricia artaxerxes;NA;0.394;Aricia artaxerxes;0.999502890976379;  
HQ004058;Lepidoptera;Aricia artaxerxes;NA;0.394;Aricia artaxerxes;0.999502890976379;  
HQ004059;Lepidoptera;Aricia artaxerxes;NA;0.394;Aricia artaxerxes;0.999502890976379;  
HQ004060;Lepidoptera;Aricia artaxerxes;NA;0.394;Aricia artaxerxes;0.999502890976379;  
HQ004061;Lepidoptera;Aricia artaxerxes;NA;0.394;Aricia artaxerxes;0.999502890976379;  
HQ004062;Lepidoptera;Aricia artaxerxes;NA;0.151;Aricia artaxerxes;0.999531539195816;  
HQ004063;Lepidoptera;Aricia artaxerxes;NA;0.394;Aricia artaxerxes;0.999502890976379;  
HQ004064;Lepidoptera;Aricia artaxerxes;NA;0.394;Aricia artaxerxes;0.999502890976379;  
HQ004065;Lepidoptera;Aricia artaxerxes;NA;0.394;Aricia artaxerxes;0.999502890976379;  
HQ004076;Lepidoptera;Boloria dia;Boloria dia;1;Boloria dia;0.99999999980503;  
HQ004077;Lepidoptera;Boloria dia;Boloria dia;1;Boloria dia;0.99999999980503;  
HQ004079;Lepidoptera;Boloria dia;Boloria dia;1;Boloria dia;0.99999999980503;  
HQ004080;Lepidoptera;Boloria dia;Boloria dia;1;Boloria dia;0.99999999980503;  
HQ004081;Lepidoptera;Boloria dia;Boloria dia;1;Boloria dia;0.99999999980503;  
HQ004082;Lepidoptera;Boloria euphrosyne;Boloria euphrosyne;1;Boloria  
euphrosyne;0.999998102693392;  
HQ004083;Lepidoptera;Boloria euphrosyne;Boloria euphrosyne;1;Boloria  
euphrosyne;0.999998552914401;  
HQ004084;Lepidoptera;Boloria euphrosyne;Boloria euphrosyne;1;Boloria  
euphrosyne;0.99999841672292;  
HQ004085;Lepidoptera;Boloria euphrosyne;Boloria euphrosyne;1;Boloria  
euphrosyne;0.999997763335159;  
HQ004086;Lepidoptera;Boloria euphrosyne;Boloria euphrosyne;1;Boloria  
euphrosyne;0.999998552914401;  
HQ004087;Lepidoptera;Boloria euphrosyne;Boloria euphrosyne;1;Boloria  
euphrosyne;0.999998514406196;  
HQ004088;Lepidoptera;Boloria euphrosyne;Boloria euphrosyne;1;Boloria  
euphrosyne;0.999998552914401;  
HQ004089;Lepidoptera;Boloria euphrosyne;Boloria euphrosyne;1;Boloria  
euphrosyne;0.999998102693392;  
HQ004090;Lepidoptera;Boloria pales;Boloria pales;0.998;Boloria pales;0.996520205418986;  
HQ004091;Lepidoptera;Boloria pales;Boloria pales;0.998;Boloria pales;0.996520205418986;  
HQ004092;Lepidoptera;Boloria pales;Boloria pales;0.998;Boloria pales;0.996520205418986;  
HQ004095;Lepidoptera;Boloria pales;Boloria pales;0.998;Boloria pales;0.996520205418986;  
HQ004096;Lepidoptera;Boloria pales;Boloria pales;0.989;Boloria pales;0.995496736606565;  
HQ004106;Lepidoptera;Boloria titania;Boloria titania;0.001;Boloria titania;0.99990849163814;  
HQ004107;Lepidoptera;Boloria titania;Boloria titania;0.001;Boloria titania;0.99990849163814;  
HQ004108;Lepidoptera;Boloria titania;Boloria titania;0.001;Boloria titania;0.99990849163814;



HQ004109;Lepidoptera;Boloria titania;Boloria titania;0.001;Boloria titania;0.99990849163814;  
HQ004110;Lepidoptera;Boloria titania;Boloria titania;0.001;Boloria titania;0.99990849163814;  
HQ004111;Lepidoptera;Boloria titania;Boloria titania;0.001;Boloria titania;0.99990849163814;  
HQ004112;Lepidoptera;Brenthis daphne;NA;0.102;Brenthis daphne;0.717134521611551;  
HQ004113;Lepidoptera;Brenthis daphne;NA;0.102;Brenthis daphne;0.717134521611551;  
HQ004114;Lepidoptera;Brenthis daphne;NA;0.102;Brenthis daphne;0.717134521611551;  
HQ004115;Lepidoptera;Brenthis daphne;NA;0.063;Brenthis daphne;0.85446197774429;  
HQ004116;Lepidoptera;Brenthis daphne;NA;0.102;Brenthis daphne;0.717134521611551;  
HQ004117;Lepidoptera;Brenthis daphne;NA;0.102;Brenthis daphne;0.717134521611551;  
HQ004118;Lepidoptera;Brenthis daphne;Brenthis daphne;1;Brenthis daphne;0.998500858925195;  
HQ004119;Lepidoptera;Brenthis daphne;NA;0.043;Brenthis daphne;0.722020100159206;  
HQ004120;Lepidoptera;Brenthis daphne;NA;0.102;Brenthis daphne;0.717134521611551;  
HQ004121;Lepidoptera;Brenthis hecate;Brenthis hecate;0.015;Brenthis hecate;0.999871793261773;  
HQ004122;Lepidoptera;Brenthis hecate;NA;0.034;Brenthis hecate;0.99987292514345;  
HQ004123;Lepidoptera;Brenthis hecate;NA;0.061;Brenthis hecate;0.999698739882756;  
HQ004124;Lepidoptera;Brenthis hecate;NA;0.001;Brenthis hecate;0.9996055733577;  
HQ004125;Lepidoptera;Brenthis hecate;NA;0.072;Brenthis hecate;0.999803056289114;  
HQ004126;Lepidoptera;Brenthis hecate;NA;0.083;Brenthis hecate;0.999707638996184;  
HQ004127;Lepidoptera;Brenthis hecate;NA;0.083;Brenthis hecate;0.999707638996184;  
HQ004128;Lepidoptera;Brenthis hecate;Brenthis hecate;0.015;Brenthis hecate;0.999840709488841;  
HQ004129;Lepidoptera;Brenthis ino;Brenthis ino;0.998;Brenthis ino;0.995325118916732;  
HQ004130;Lepidoptera;Brenthis ino;Brenthis ino;0.998;Brenthis ino;0.995325118916732;  
HQ004131;Lepidoptera;Brenthis ino;Brenthis ino;1;Brenthis ino;0.99882211566857;  
HQ004132;Lepidoptera;Brenthis ino;Brenthis ino;0.998;Brenthis ino;0.995325118916732;  
HQ004133;Lepidoptera;Brenthis ino;Brenthis ino;0.007;Brenthis ino;0.977157381961834;  
HQ004134;Lepidoptera;Brenthis ino;Brenthis ino;1;Brenthis ino;0.997823940101957;  
HQ004135;Lepidoptera;Brenthis ino;Brenthis ino;1;Brenthis ino;0.99882211566857;  
HQ004136;Lepidoptera;Brenthis ino;Brenthis ino;1;Brenthis ino;0.997823940101957;  
HQ004137;Lepidoptera;Brintesia circe;Brintesia circe;NA;Brintesia circe;0.99999813082031;  
HQ004138;Lepidoptera;Brintesia circe;Brintesia circe;1;Brintesia circe;0.99999566571953;  
HQ004139;Lepidoptera;Brintesia circe;Brintesia circe;NA;Brintesia circe;0.99999592702691;  
HQ004140;Lepidoptera;Brintesia circe;Brintesia circe;NA;Brintesia circe;0.99999823544969;  
HQ004141;Lepidoptera;Brintesia circe;Brintesia circe;NA;Brintesia circe;0.99999592702691;  
HQ004142;Lepidoptera;Brintesia circe;Brintesia circe;NA;Brintesia circe;0.99999592702691;  
HQ004143;Lepidoptera;Brintesia circe;Brintesia circe;1;Brintesia circe;0.9999911118765;  
HQ004144;Lepidoptera;Brintesia circe;Brintesia circe;NA;Brintesia circe;0.99999823544969;  
HQ004145;Lepidoptera;Brintesia circe;Brintesia circe;1;Brintesia circe;0.99999264057679;  
HQ004146;Lepidoptera;Callophrys rubi;NA;0.003;Callophrys rubi;0.996753822785804;  
HQ004147;Lepidoptera;Callophrys rubi;NA;0.003;Callophrys rubi;0.997328639918919;  
HQ004148;Lepidoptera;Callophrys rubi;NA;0.003;Callophrys rubi;0.996753822785804;  
HQ004149;Lepidoptera;Callophrys rubi;NA;0.003;Callophrys rubi;0.997328639918919;  
HQ004150;Lepidoptera;Callophrys rubi;NA;0.002;Callophrys rubi;0.996052483231556;  
HQ004151;Lepidoptera;Callophrys rubi;NA;0.003;Callophrys rubi;0.997328639918919;  
HQ004152;Lepidoptera;Callophrys rubi;NA;0.002;Callophrys rubi;0.993800423545913;  
HQ004153;Lepidoptera;Callophrys rubi;NA;0.002;Callophrys rubi;0.997663599924675;  
HQ004154;Lepidoptera;Callophrys rubi;NA;0.001;Ahlbergia frivaldszkyi;0.774173868731941;  
HQ004155;Lepidoptera;Carcharodus alceae;Carcharodus alceae;NA;Carcharodus alceae;0.999998131544272;  
HQ004156;Lepidoptera;Carcharodus alceae;Carcharodus alceae;0.999;Carcharodus alceae;0.9999999752319;  
HQ004157;Lepidoptera;Carcharodus alceae;Carcharodus alceae;0.999;Carcharodus alceae;0.99999998008462;  
HQ004158;Lepidoptera;Carcharodus alceae;Carcharodus alceae;0.001;Carcharodus alceae;0.99999998054733;  
HQ004159;Lepidoptera;Carcharodus alceae;Carcharodus alceae;0.999;Carcharodus alceae;0.99999998008462;  
HQ004160;Lepidoptera;Carcharodus alceae;Carcharodus alceae;0.999;Carcharodus alceae;0.99999998008462;  
HQ004161;Lepidoptera;Carcharodus alceae;Carcharodus alceae;NA;Carcharodus alceae;0.999998131544272;  
HQ004162;Lepidoptera;Carcharodus alceae;Carcharodus alceae;0.999;Carcharodus alceae;0.99999996339511;  
HQ004163;Lepidoptera;Carcharodus alceae;Carcharodus alceae;NA;Carcharodus alceae;0.999998131544272;  
HQ004164;Lepidoptera;Carcharodus alceae;Carcharodus alceae;0.999;Carcharodus alceae;0.99999998008462;  
HQ004165;Lepidoptera;Carcharodus alceae;Carcharodus alceae;0.999;Carcharodus alceae;0.99999998321016;  
HQ004175;Lepidoptera;Carcharodus lavatherae;Carcharodus lavatherae;0.047;Carcharodus lavatherae;0.998322815497744;  
HQ004176;Lepidoptera;Carcharodus lavatherae;NA;0.109;Carcharodus lavatherae;0.998655193590746;  
HQ004177;Lepidoptera;Carcharodus lavatherae;NA;0.108;Carcharodus lavatherae;0.998927718400682;  
HQ004178;Lepidoptera;Carcharodus lavatherae;NA;0.108;Carcharodus lavatherae;0.998927718400682;  
HQ004188;Lepidoptera;Carterocephalus palaemon;Carterocephalus palaemon;0.011;Carterocephalus palaemon;0.826779617779824;  
HQ004189;Lepidoptera;Carterocephalus palaemon;Carterocephalus palaemon;0.013;Carterocephalus palaemon;0.795574350711358;  
HQ004190;Lepidoptera;Carterocephalus palaemon;NA;0.028;NA;0.999999999999333;

HQ004191;Lepidoptera;Carterocephalus palaemon;NA;0.052;Carterocephalus palaemon;0.728445051795325;  
HQ004192;Lepidoptera;Carterocephalus palaemon;Carterocephalus palaemon;0.015;Carterocephalus palaemon;0.803403729950902;  
HQ004193;Lepidoptera;Carterocephalus palaemon;NA;0.052;Carterocephalus palaemon;0.728445051795325;  
HQ004194;Lepidoptera;Carterocephalus palaemon;NA;0.052;Carterocephalus palaemon;0.728445051795325;  
HQ004195;Lepidoptera;Celastrina argiolus;Celastrina argiolus;1;Celastrina argiolus;0.999631157817044;  
HQ004196;Lepidoptera;Celastrina argiolus;Celastrina argiolus;1;Celastrina argiolus;0.999631157817044;  
HQ004197;Lepidoptera;Celastrina argiolus;Celastrina argiolus;1;Celastrina argiolus;0.999527385150531;  
HQ004198;Lepidoptera;Celastrina argiolus;Celastrina argiolus;1;Celastrina argiolus;0.999527385150531;  
HQ004199;Lepidoptera;Celastrina argiolus;Celastrina argiolus;0.998;Celastrina argiolus;0.999557774480579;  
HQ004200;Lepidoptera;Celastrina argiolus;Celastrina argiolus;1;Celastrina argiolus;0.999631157817044;  
HQ004201;Lepidoptera;Celastrina argiolus;Celastrina argiolus;1;Celastrina argiolus;0.999527385150531;  
HQ004202;Lepidoptera;Celastrina argiolus;Celastrina argiolus;1;Celastrina argiolus;0.999527385150531;  
HQ004203;Lepidoptera;Celastrina argiolus;Celastrina argiolus;1;Celastrina argiolus;0.999527385150531;  
HQ004204;Lepidoptera;Chazara briseis;Chazara briseis;0.001;Chazara briseis;0.999984130678865;  
HQ004205;Lepidoptera;Chazara briseis;Chazara briseis;0.001;Chazara briseis;0.999984130678865;  
HQ004206;Lepidoptera;Chazara briseis;Chazara briseis;0.001;Chazara briseis;0.999984130678865;  
HQ004207;Lepidoptera;Chazara briseis;Chazara briseis;0.001;Chazara briseis;0.999960914898745;  
HQ004208;Lepidoptera;Chazara briseis;Chazara briseis;0.001;Chazara briseis;0.999984130678865;  
HQ004209;Lepidoptera;Chazara briseis;Chazara briseis;0.001;Chazara briseis;0.999944132711476;  
HQ004210;Lepidoptera;Coenonympha arcania;NA;0.002;NA;0.999999999999975;  
HQ004211;Lepidoptera;Coenonympha arcania;NA;0.058;NA;0.999999999999967;  
HQ004212;Lepidoptera;Coenonympha arcania;NA;0.001;NA;0.999999999999973;  
HQ004213;Lepidoptera;Coenonympha arcania;NA;0.001;NA;0.999999999999975;  
HQ004214;Lepidoptera;Coenonympha arcania;NA;0.001;NA;0.999999999999975;  
HQ004215;Lepidoptera;Coenonympha arcania;NA;0.001;NA;0.999999999999975;  
HQ004216;Lepidoptera;Coenonympha arcania;NA;0.058;NA;0.999999999999967;  
HQ004217;Lepidoptera;Coenonympha arcania;NA;0.001;NA;0.999999999999975;  
HQ004218;Lepidoptera;Coenonympha arcania;NA;0.001;NA;0.999999999999965;  
HQ004219;Lepidoptera;Coenonympha glycerion;NA;0.206;Coenonympha glycerion;0.999999087964472;  
HQ004220;Lepidoptera;Coenonympha glycerion;NA;0.28;Coenonympha glycerion;0.99998036263913;  
HQ004221;Lepidoptera;Coenonympha glycerion;NA;0.199;Coenonympha glycerion;0.99998758999797;  
HQ004222;Lepidoptera;Coenonympha glycerion;NA;0.064;Coenonympha glycerion;0.99999129312964;  
HQ004223;Lepidoptera;Coenonympha glycerion;NA;0.295;Coenonympha glycerion;0.99998958157621;  
HQ004224;Lepidoptera;Coenonympha glycerion;NA;0.28;Coenonympha glycerion;0.99998036263913;  
HQ004225;Lepidoptera;Coenonympha glycerion;NA;0.295;Coenonympha glycerion;0.99998958157621;  
HQ004226;Lepidoptera;Coenonympha glycerion;NA;0.295;Coenonympha glycerion;0.99998958157621;  
HQ004227;Lepidoptera;Coenonympha glycerion;NA;0.32;Coenonympha glycerion;0.99996720049446;  
HQ004233;Lepidoptera;Coenonympha pamphilus;Coenonympha pamphilus;1;Coenonympha pamphilus;0.9999999999999545;  
HQ004234;Lepidoptera;Coenonympha pamphilus;Coenonympha pamphilus;1;Coenonympha pamphilus;0.9999999999999744;  
HQ004235;Lepidoptera;Coenonympha pamphilus;Coenonympha pamphilus;1;Coenonympha pamphilus;0.9999999999999744;  
HQ004236;Lepidoptera;Coenonympha pamphilus;Coenonympha pamphilus;1;Coenonympha pamphilus;0.9999999999999432;  
HQ004237;Lepidoptera;Coenonympha pamphilus;Coenonympha pamphilus;1;Coenonympha pamphilus;0.9999999999999488;  
HQ004238;Lepidoptera;Coenonympha pamphilus;Coenonympha pamphilus;1;Coenonympha pamphilus;0.9999999999999744;  
HQ004239;Lepidoptera;Coenonympha pamphilus;Coenonympha pamphilus;1;Coenonympha pamphilus;0.9999999999999744;  
HQ004240;Lepidoptera;Coenonympha pamphilus;Coenonympha pamphilus;1;Coenonympha pamphilus;0.9999999999999744;  
HQ004241;Lepidoptera;Coenonympha pamphilus;Coenonympha pamphilus;1;Coenonympha pamphilus;0.9999999999999744;  
HQ004242;Lepidoptera;Coenonympha rhodopensis;NA;0.019;Coenonympha rhodopensis;0.872457011198986;  
HQ004243;Lepidoptera;Coenonympha rhodopensis;NA;0.019;Coenonympha rhodopensis;0.872457011198986;  
HQ004244;Lepidoptera;Coenonympha rhodopensis;NA;0.035;Coenonympha rhodopensis;0.853098489717182;  
HQ004245;Lepidoptera;Coenonympha rhodopensis;NA;0.019;Coenonympha rhodopensis;0.872457011198986;  
HQ004246;Lepidoptera;Coenonympha rhodopensis;NA;0.035;Coenonympha rhodopensis;0.853098489717182;  
HQ004252;Lepidoptera;Colias alfacariensis;Colias alfacariensis;0.001;Colias alfacariensis;0.999926026317526;  
HQ004253;Lepidoptera;Colias alfacariensis;Colias alfacariensis;0.001;Colias alfacariensis;0.999926026317526;

HQ004254;Lepidoptera;Colias alfacariensis;Colias alfacariensis;1;Colias alfacariensis;0.999958999251201;  
HQ004255;Lepidoptera;Colias alfacariensis;Colias alfacariensis;1;Colias alfacariensis;0.999986994131001;  
HQ004256;Lepidoptera;Colias alfacariensis;Colias alfacariensis;1;Colias alfacariensis;0.999986994131001;  
HQ004257;Lepidoptera;Colias alfacariensis;Colias alfacariensis;1;Colias alfacariensis;0.999986994131001;  
HQ004258;Lepidoptera;Colias alfacariensis;Colias alfacariensis;1;Colias alfacariensis;0.999958999251201;  
HQ004259;Lepidoptera;Colias alfacariensis;Colias alfacariensis;1;Colias alfacariensis;0.999958999251201;  
HQ004260;Lepidoptera;Colias alfacariensis;Colias alfacariensis;1;Colias alfacariensis;0.999986994131001;  
HQ004261;Lepidoptera;Colias alfacariensis;Colias alfacariensis;1;Colias alfacariensis;0.999986994131001;  
HQ004262;Lepidoptera;Colias alfacariensis;Colias alfacariensis;1;Colias alfacariensis;0.999985834946241;  
HQ004263;Lepidoptera;Colias alfacariensis;Colias alfacariensis;1;Colias alfacariensis;0.999958999251201;  
HQ004264;Lepidoptera;Colias alfacariensis;Colias alfacariensis;1;Colias alfacariensis;0.999986994131001;  
HQ004265;Lepidoptera;Colias alfacariensis;Colias alfacariensis;1;Colias alfacariensis;0.999966879080062;  
HQ004266;Lepidoptera;Colias alfacariensis;Colias alfacariensis;1;Colias alfacariensis;0.999959811913174;  
HQ004267;Lepidoptera;Colias alfacariensis;Colias alfacariensis;1;Colias alfacariensis;0.999987100165369;  
HQ004268;Lepidoptera;Colias alfacariensis;Colias alfacariensis;1;Colias alfacariensis;0.999986994131001;  
HQ004269;Lepidoptera;Colias alfacariensis;Colias alfacariensis;0.001;Colias alfacariensis;0.999966522684745;  
HQ004274;Lepidoptera;Colias crocea;NA;0.059;NA;0.999999999999738;  
HQ004275;Lepidoptera;Colias crocea;NA;0.059;NA;0.999999999999738;  
HQ004276;Lepidoptera;Colias croceus;NA;NA;NA;0.999999999999568;  
HQ004277;Lepidoptera;Colias crocea;NA;NA;NA;0.999999999999568;  
HQ004278;Lepidoptera;Colias crocea;NA;0.059;NA;0.999999999999738;  
HQ004279;Lepidoptera;Colias crocea;NA;NA;NA;0.999999999999751;  
HQ004280;Lepidoptera;Colias crocea;NA;0.059;NA;0.999999999999738;  
HQ004281;Lepidoptera;Colias crocea;NA;0.059;NA;0.999999999999738;  
HQ004282;Lepidoptera;Colias crocea;NA;NA;Colias crocea;0.708512483346918;  
HQ004297;Lepidoptera;Colias hyale;Colias hyale;0.012;Colias hyale;0.999998203311315;  
HQ004298;Lepidoptera;Colias hyale;Colias hyale;0.012;Colias hyale;0.999998203311315;  
HQ004299;Lepidoptera;Colias hyale;Colias hyale;0.015;Colias hyale;0.999997884296128;  
HQ004300;Lepidoptera;Colias hyale;Colias hyale;0.015;Colias hyale;0.999997884296128;  
HQ004301;Lepidoptera;Colias hyale;Colias hyale;0.015;Colias hyale;0.999997884296128;  
HQ004302;Lepidoptera;Colias hyale;Colias hyale;0.015;Colias hyale;0.999997884296128;  
HQ004307;Lepidoptera;Cupido alcetas;Cupido alcetas;0.998;Cupido alcetas;0.996143733014087;  
HQ004308;Lepidoptera;Cupido alcetas;Cupido alcetas;0.998;Cupido alcetas;0.996143733014087;  
HQ004309;Lepidoptera;Cupido alcetas;Cupido alcetas;0.995;Cupido alcetas;0.996047865612985;  
HQ004310;Lepidoptera;Cupido argiades;NA;0.499;NA;0.9999999999984682;  
HQ004311;Lepidoptera;Cupido argiades;NA;0.499;NA;0.9999999999984682;  
HQ004312;Lepidoptera;Cupido argiades;NA;0.499;NA;0.9999999999984682;  
HQ004313;Lepidoptera;Cupido argiades;NA;0.183;Cupido argiades;0.779615330961106;  
HQ004314;Lepidoptera;Cupido argiades;NA;0.497;NA;0.9999999999985171;  
HQ004315;Lepidoptera;Cupido argiades;NA;0.499;NA;0.9999999999984682;  
HQ004316;Lepidoptera;Cupido argiades;NA;0.499;NA;0.9999999999984682;  
HQ004317;Lepidoptera;Cupido argiades;NA;0.499;NA;0.9999999999984682;  
HQ004318;Lepidoptera;Cupido argiades;NA;0.499;NA;0.9999999999984682;  
HQ004328;Lepidoptera;Cupido minimus;NA;0.016;Cupido minimus;0.999712342982067;  
HQ004329;Lepidoptera;Cupido minimus;NA;0.001;Cupido minimus;0.997732398012586;  
HQ004330;Lepidoptera;Cupido minimus;NA;0.001;Cupido minimus;0.997621299333221;  
HQ004331;Lepidoptera;Cupido minimus;NA;0.009;Cupido minimus;0.999791453712643;  
HQ004332;Lepidoptera;Cupido minimus;NA;0.009;Cupido minimus;0.999791453712643;  
HQ004333;Lepidoptera;Cupido minimus;NA;0.004;Cupido minimus;0.99982784666808;  
HQ004334;Lepidoptera;Cupido minimus;NA;0.003;Cupido minimus;0.999787792962518;  
HQ004335;Lepidoptera;Cupido minimus;NA;0.004;Cupido minimus;0.99987402211542;  
HQ004336;Lepidoptera;Cupido minimus;NA;0.003;Cupido minimus;0.99984089771194;  
HQ004337;Lepidoptera;Cupido minimus;NA;0.001;Cupido minimus;0.999892569949957;  
HQ004338;Lepidoptera;Cupido osiris;Cupido osiris;1;Cupido osiris;0.999998710927265;  
HQ004339;Lepidoptera;Cupido osiris;Cupido osiris;1;Cupido osiris;0.999998710927265;  
HQ004340;Lepidoptera;Cupido osiris;Cupido osiris;1;Cupido osiris;0.99999920248743;  
HQ004341;Lepidoptera;Cupido osiris;Cupido osiris;1;Cupido osiris;0.99999920248743;  
HQ004342;Lepidoptera;Cupido osiris;Cupido osiris;1;Cupido osiris;0.9999991590116;  
HQ004343;Lepidoptera;Cupido osiris;Cupido osiris;1;Cupido osiris;0.999998710927265;  
HQ004344;Lepidoptera;Cupido osiris;Cupido osiris;1;Cupido osiris;0.99999837166924;  
HQ004345;Lepidoptera;Cyraniris semiargus;NA;NA;Cyraniris semiargus;0.999069195783418;

HQ004346;Lepidoptera;Cyaniris semiargus;Cyaniris semiargus;NA;Cyaniris semiargus;0.999717779236788;  
HQ004347;Lepidoptera;Cyaniris semiargus;NA;NA;Cyaniris semiargus;0.998474211845289;  
HQ004348;Lepidoptera;Cyaniris semiargus;Cyaniris semiargus;NA;Cyaniris semiargus;0.999707733485007;  
HQ004349;Lepidoptera;Cyaniris semiargus;NA;NA;Cyaniris semiargus;0.999196155013845;  
HQ004350;Lepidoptera;Cyaniris semiargus;NA;NA;Cyaniris semiargus;0.997097672202902;  
HQ004351;Lepidoptera;Cyaniris semiargus;NA;NA;Cyaniris semiargus;0.999051841766953;  
HQ004352;Lepidoptera;Cyaniris semiargus;NA;NA;Cyaniris semiargus;0.999051841766953;  
HQ004369;Lepidoptera;Erebia epiphron;Erebia epiphron;NA;Erebia epiphron;0.998021437243156;  
HQ004370;Lepidoptera;Erebia epiphron;Erebia epiphron;NA;Erebia epiphron;0.995130554397791;  
HQ004371;Lepidoptera;Erebia epiphron;Erebia epiphron;NA;Erebia epiphron;0.998021437243156;  
HQ004372;Lepidoptera;Erebia epiphron;Erebia epiphron;NA;Erebia epiphron;0.996812763610257;  
HQ004373;Lepidoptera;Erebia epiphron;Erebia epiphron;NA;Erebia epiphron;0.998021437243156;  
HQ004374;Lepidoptera;Erebia epiphron;Erebia epiphron;NA;Erebia epiphron;0.995130554397791;  
HQ004375;Lepidoptera;Erebia epiphron;Erebia epiphron;NA;Erebia epiphron;0.998021437243156;  
HQ004376;Lepidoptera;Erebia epiphron;Erebia epiphron;NA;Erebia epiphron;0.998021437243156;  
HQ004377;Lepidoptera;Erebia epiphron;Erebia epiphron;NA;Erebia epiphron;0.998021437243156;  
HQ004378;Lepidoptera;Erebia euryale;NA;NA;Erebia euryale;0.914169138470041;  
HQ004379;Lepidoptera;Erebia euryale;NA;NA;Erebia euryale;0.919518760623792;  
HQ004380;Lepidoptera;Erebia euryale;NA;NA;Erebia euryale;0.919518760623792;  
HQ004381;Lepidoptera;Erebia euryale;NA;NA;Erebia euryale;0.919518760623792;  
HQ004382;Lepidoptera;Erebia euryale;NA;NA;Erebia euryale;0.919518760623792;  
HQ004383;Lepidoptera;Erebia euryale;NA;NA;Erebia euryale;0.919518760623792;  
HQ004384;Lepidoptera;Erebia euryale;NA;NA;Erebia euryale;0.919518760623792;  
HQ004386;Lepidoptera;Erebia euryale;NA;NA;Erebia euryale;0.919518760623792;  
HQ004387;Lepidoptera;Erebia euryale;NA;NA;Erebia euryale;0.919518760623792;  
HQ004405;Lepidoptera;Erebia manto;NA;0.109;Erebia manto;0.996739694842059;  
HQ004406;Lepidoptera;Erebia manto;Erebia manto;NA;Erebia manto;0.999129075172383;  
HQ004407;Lepidoptera;Erebia manto;NA;0.109;Erebia manto;0.996739694842059;  
HQ004408;Lepidoptera;Erebia manto;NA;0.063;Erebia manto;0.998375472639544;  
HQ004409;Lepidoptera;Erebia manto;NA;NA;Erebia manto;0.997239343105498;  
HQ004410;Lepidoptera;Erebia manto;NA;0.063;Erebia manto;0.998375472639544;  
HQ004411;Lepidoptera;Erebia manto;NA;NA;Erebia manto;0.997239343105498;  
HQ004412;Lepidoptera;Erebia manto;NA;0.109;Erebia manto;0.996739694842059;  
HQ004413;Lepidoptera;Erebia manto;NA;0.063;Erebia manto;0.998375472639544;  
HQ004431;Lepidoptera;Erebia pandrose;Erebia pandrose;0.003;Erebia pandrose;0.993608645577247;  
HQ004432;Lepidoptera;Erebia pandrose;Erebia pandrose;0.998;Erebia pandrose;0.997117103851311;  
HQ004433;Lepidoptera;Erebia pandrose;Erebia pandrose;0.999;Erebia pandrose;0.994023911585754;  
HQ004434;Lepidoptera;Erebia pandrose;Erebia pandrose;0.999;Erebia pandrose;0.994023911585754;  
HQ004435;Lepidoptera;Erebia pharte;Erebia pharte;1;Erebia pharte;0.999999973572898;  
HQ004436;Lepidoptera;Erebia pharte;Erebia pharte;1;Erebia pharte;0.999999973572898;  
HQ004437;Lepidoptera;Erebia pronoe;Erebia pronoe;1;Erebia pronoe;0.998721231437303;  
HQ004438;Lepidoptera;Erebia pronoe;Erebia pronoe;0.001;Erebia pronoe;0.997621582415603;  
HQ004439;Lepidoptera;Erebia pronoe;Erebia pronoe;0.999;Erebia pronoe;0.995193627523185;  
HQ004440;Lepidoptera;Erebia pronoe;Erebia pronoe;0.001;Erebia pronoe;0.997621582415603;  
HQ004441;Lepidoptera;Erebia pronoe;Erebia pronoe;0.001;Erebia pronoe;0.998200106450327;  
HQ004442;Lepidoptera;Erebia pronoe;Erebia pronoe;0.001;Erebia pronoe;0.997621582415603;  
HQ004443;Lepidoptera;Erebia pronoe;Erebia pronoe;1;Erebia pronoe;0.999110793248495;  
HQ004444;Lepidoptera;Erebia pronoe;Erebia pronoe;1;Erebia pronoe;0.998721231437303;  
HQ004456;Lepidoptera;Erynnis tages;Erynnis tages;1;Erynnis tages;0.999998697902579;  
HQ004457;Lepidoptera;Erynnis tages;Erynnis tages;1;Erynnis tages;0.999998697902579;  
HQ004458;Lepidoptera;Erynnis tages;Erynnis tages;1;Erynnis tages;0.999998697902579;  
HQ004459;Lepidoptera;Erynnis tages;Erynnis tages;1;Erynnis tages;0.999998697902579;  
HQ004460;Lepidoptera;Erynnis tages;Erynnis tages;1;Erynnis tages;0.999999281987018;  
HQ004461;Lepidoptera;Erynnis tages;Erynnis tages;1;Erynnis tages;0.999999281987018;  
HQ004470;Lepidoptera;Aricia eumedon;Eumedonia eumedon;0.012;Eumedonia eumedon;0.993624989649652;  
HQ004471;Lepidoptera;Aricia eumedon;Eumedonia eumedon;0.003;Eumedonia eumedon;0.996145222741686;  
HQ004472;Lepidoptera;Aricia eumedon;Eumedonia eumedon;0.004;Eumedonia eumedon;0.995179062090393;  
HQ004473;Lepidoptera;Aricia eumedon;Eumedonia eumedon;0.02;Eumedonia eumedon;0.994743149109561;  
HQ004479;Lepidoptera;Euphydryas aurinia;NA;0.31;Euphydryas aurinia;0.993387708761386;  
HQ004480;Lepidoptera;Euphydryas aurinia;NA;0.31;Euphydryas aurinia;0.993387708761386;  
HQ004481;Lepidoptera;Euphydryas aurinia;NA;0.052;Euphydryas aurinia;0.996086749472406;  
HQ004482;Lepidoptera;Euphydryas maturna;NA;0.125;Euphydryas maturna;0.861122566117855;  
HQ004483;Lepidoptera;Euphydryas maturna;NA;0.067;Euphydryas maturna;0.719365084631966;  
HQ004484;Lepidoptera;Euphydryas maturna;NA;NA;NA;0.999999999996973;  
HQ004485;Lepidoptera;Euphydryas maturna;NA;NA;NA;0.999999999996973;  
HQ004486;Lepidoptera;Euphydryas maturna;NA;NA;NA;0.999999999996973;  
HQ004487;Lepidoptera;Euphydryas maturna;NA;0.043;Euphydryas maturna;0.800951977353662;  
HQ004488;Lepidoptera;Euphydryas maturna;NA;0.043;Euphydryas maturna;0.800951977353662;  
HQ004489;Lepidoptera;Euphydryas maturna;NA;NA;Euphydryas maturna;0.957925789833158;  
HQ004490;Lepidoptera;Glaucopsyche alexis;NA;NA;Glaucopsyche alexis;0.979381169624069;  
HQ004491;Lepidoptera;Glaucopsyche alexis;NA;NA;Glaucopsyche alexis;0.979381169624069;  
HQ004492;Lepidoptera;Glaucopsyche alexis;NA;NA;Glaucopsyche alexis;0.979381169624069;  
HQ004493;Lepidoptera;Glaucopsyche alexis;NA;NA;Glaucopsyche alexis;0.979381169624069;  
HQ004494;Lepidoptera;Glaucopsyche alexis;NA;NA;Glaucopsyche alexis;0.979381169624069;  
HQ004495;Lepidoptera;Glaucopsyche alexis;NA;NA;Glaucopsyche alexis;0.979381169624069;  
HQ004496;Lepidoptera;Glaucopsyche alexis;NA;NA;Glaucopsyche alexis;0.979381169624069;

HQ004497;Lepidoptera;Glaucopsyche alexis;NA;NA;Glaucopsyche alexis;0.979381169624069;  
HQ004498;Lepidoptera;Glaucopsyche alexis;NA;NA;Glaucopsyche alexis;0.979381169624069;  
HQ004499;Lepidoptera;Glaucopsyche alexis;NA;0.13;Glaucopsyche alexis;0.982273953020636;  
HQ004500;Lepidoptera;Glaucopsyche alexis;NA;NA;Glaucopsyche alexis;0.979381169624069;  
HQ004501;Lepidoptera;Glaucopsyche alexis;NA;NA;Glaucopsyche alexis;0.899237597871183;  
HQ004502;Lepidoptera;Gonepteryx rhamni;Gonepteryx rhamni;0.008;Gonepteryx  
rhamni;0.999527533936108;  
HQ004503;Lepidoptera;Gonepteryx rhamni;NA;0.474;Gonepteryx rhamni;0.982076396127858;  
HQ004504;Lepidoptera;Gonepteryx rhamni;NA;0.474;Gonepteryx rhamni;0.982076396127858;  
HQ004505;Lepidoptera;Gonepteryx rhamni;Gonepteryx rhamni;0.02;Gonepteryx  
rhamni;0.994554206399161;  
HQ004506;Lepidoptera;Gonepteryx rhamni;NA;0.474;Gonepteryx rhamni;0.982076396127858;  
HQ004507;Lepidoptera;Gonepteryx rhamni;NA;0.474;Gonepteryx rhamni;0.982076396127858;  
HQ004508;Lepidoptera;Hamearis lucina;NA;NA;Hamearis lucina;0.99999999984141;  
HQ004509;Lepidoptera;Hamearis lucina;NA;NA;Hamearis lucina;0.99999999984141;  
HQ004510;Lepidoptera;Hamearis lucina;NA;NA;Hamearis lucina;0.99999999964501;  
HQ004511;Lepidoptera;Hamearis lucina;Hamearis lucina;1;Hamearis lucina;0.99999999922693;  
HQ004512;Lepidoptera;Hamearis lucina;Hamearis lucina;1;Hamearis lucina;0.9999999996885;  
HQ004513;Lepidoptera;Hamearis lucina;NA;NA;Hamearis lucina;0.99999999984141;  
HQ004514;Lepidoptera;Hamearis lucina;NA;NA;Hamearis lucina;0.99999999984141;  
HQ004515;Lepidoptera;Hamearis lucina;NA;NA;Hamearis lucina;0.99999999984141;  
HQ004518;Lepidoptera;Heteropterus morpheus;NA;NA;Heteropterus morpheus;0.99999999999943;  
HQ004520;Lepidoptera;Heteropterus morpheus;NA;NA;Heteropterus morpheus;0.99999999999943;  
HQ004521;Lepidoptera;Hipparchia fagi;NA;NA;Hipparchia fagi;0.977048494324972;  
HQ004522;Lepidoptera;Hipparchia fagi;NA;NA;Hipparchia fagi;0.97466470298983;  
HQ004523;Lepidoptera;Hipparchia fagi;NA;NA;Hipparchia fagi;0.981425325990758;  
HQ004524;Lepidoptera;Hipparchia fagi;NA;NA;Hipparchia fagi;0.977048494324972;  
HQ004525;Lepidoptera;Hipparchia fagi;NA;NA;Hipparchia fagi;0.979223379082023;  
HQ004526;Lepidoptera;Hipparchia fagi;NA;NA;Hipparchia fagi;0.977048494324972;  
HQ004527;Lepidoptera;Hipparchia fagi;NA;NA;Hipparchia fagi;0.977048494324972;  
HQ004528;Lepidoptera;Hipparchia semele;NA;0.001;Hipparchia semele;0.721904492156862;  
HQ004529;Lepidoptera;Hipparchia semele;NA;0.002;Hipparchia semele;0.768561939711135;  
HQ004530;Lepidoptera;Hipparchia semele;NA;0.002;Hipparchia semele;0.807780383202924;  
HQ004531;Lepidoptera;Hipparchia semele;NA;0.002;Hipparchia semele;0.784603069619426;  
HQ004532;Lepidoptera;Hipparchia semele;NA;NA;Hipparchia semthes;0.963652907198623;  
HQ004533;Lepidoptera;Hipparchia semele;NA;0.002;Hipparchia semele;0.709178647127069;  
HQ004534;Lepidoptera;Hipparchia semele;NA;0.002;Hipparchia semele;0.784603069619426;  
HQ004535;Lepidoptera;Hipparchia semele;NA;0.002;Hipparchia semele;0.784603069619426;  
HQ004536;Lepidoptera;Hipparchia semele;NA;0.002;Hipparchia semele;0.807780383202924;  
HQ004537;Lepidoptera;Hipparchia statilinus;Hipparchia statilinus;1;Hipparchia  
statilinus;0.99999999999858;  
HQ004538;Lepidoptera;Hipparchia statilinus;Hipparchia statilinus;1;Hipparchia  
statilinus;0.99999999999773;  
HQ004558;Lepidoptera;Issoria lathonia;Issoria lathonia;1;Issoria lathonia;0.99999999989257;  
HQ004559;Lepidoptera;Issoria lathonia;Issoria lathonia;1;Issoria lathonia;0.99999999989257;  
HQ004560;Lepidoptera;Issoria lathonia;Issoria lathonia;1;Issoria lathonia;0.99999999982947;  
HQ004561;Lepidoptera;Issoria lathonia;Issoria lathonia;1;Issoria lathonia;0.99999999989257;  
HQ004562;Lepidoptera;Issoria lathonia;Issoria lathonia;1;Issoria lathonia;0.99999999989257;  
HQ004563;Lepidoptera;Issoria lathonia;Issoria lathonia;1;Issoria lathonia;0.999999999892;  
HQ004564;Lepidoptera;Issoria lathonia;Issoria lathonia;1;Issoria lathonia;0.99999999989257;  
HQ004565;Lepidoptera;Issoria lathonia;Issoria lathonia;1;Issoria lathonia;0.99999999989257;  
HQ004566;Lepidoptera;Issoria lathonia;Issoria lathonia;1;Issoria lathonia;0.99999999989257;  
HQ004567;Lepidoptera;Issoria lathonia;Issoria lathonia;1;Issoria lathonia;0.99999999989257;  
HQ004572;Lepidoptera;Lampides boeticus;Lampides boeticus;1;Lampides boeticus;0.999999999545906;  
HQ004573;Lepidoptera;Lampides boeticus;Lampides boeticus;1;Lampides boeticus;0.999999999545906;  
HQ004574;Lepidoptera;Lampides boeticus;Lampides boeticus;1;Lampides boeticus;0.99999999942554;  
HQ004575;Lepidoptera;Lasiommata maera;Lasiommata maera;1;Lasiommata maera;0.999962725146629;  
HQ004576;Lepidoptera;Lasiommata maera;Lasiommata maera;1;Lasiommata maera;0.999999612368602;  
HQ004577;Lepidoptera;Lasiommata maera;Lasiommata maera;1;Lasiommata maera;0.999997752443814;  
HQ004578;Lepidoptera;Lasiommata maera;Lasiommata maera;1;Lasiommata maera;0.99998694479899;  
HQ004579;Lepidoptera;Lasiommata maera;Lasiommata maera;1;Lasiommata maera;0.999997474408764;  
HQ004580;Lepidoptera;Lasiommata maera;Lasiommata maera;1;Lasiommata maera;0.999999181072746;  
HQ004581;Lepidoptera;Lasiommata maera;Lasiommata maera;1;Lasiommata maera;0.999999181072746;  
HQ004582;Lepidoptera;Lasiommata maera;Lasiommata maera;1;Lasiommata maera;0.999999181072746;  
HQ004583;Lepidoptera;Lasiommata megera;Lasiommata megera;1;Lasiommata megera;0.99994250542913;  
HQ004584;Lepidoptera;Lasiommata megera;Lasiommata megera;1;Lasiommata megera;0.999928528239676;  
HQ004585;Lepidoptera;Lasiommata megera;Lasiommata megera;1;Lasiommata megera;0.999928528239676;  
HQ004586;Lepidoptera;Lasiommata megera;Lasiommata megera;1;Lasiommata megera;0.999928528239676;  
HQ004587;Lepidoptera;Lasiommata megera;Lasiommata megera;1;Lasiommata megera;0.999923974308681;  
HQ004588;Lepidoptera;Lasiommata megera;Lasiommata megera;1;Lasiommata megera;0.999928528239676;  
HQ004589;Lepidoptera;Lasiommata megera;Lasiommata megera;1;Lasiommata megera;0.999928528239676;  
HQ004622;Lepidoptera;Limenitis camilla;Limenitis camilla;0.01;Limenitis  
camilla;0.999988164408943;  
HQ004623;Lepidoptera;Limenitis camilla;Limenitis camilla;0.01;Limenitis  
camilla;0.999988164408943;  
HQ004624;Lepidoptera;Limenitis camilla;Limenitis camilla;0.01;Limenitis  
camilla;0.999988164408943;

HQ004625;Lepidoptera;Limenitis camilla;Limenitis camilla;0.009;Limenitis  
camilla;0.9999828626808;  
HQ004627;Lepidoptera;Limenitis camilla;Limenitis camilla;0.001;Limenitis  
camilla;0.999982124723693;  
HQ004635;Lepidoptera;Lycaena alciphron;Lycaena alciphron;1;Lycaena alciphron;0.999999768423036;  
HQ004636;Lepidoptera;Lycaena alciphron;Lycaena alciphron;1;Lycaena alciphron;0.999999852270048;  
HQ004637;Lepidoptera;Lycaena alciphron;Lycaena alciphron;1;Lycaena alciphron;0.999999860607612;  
HQ004638;Lepidoptera;Lycaena alciphron;Lycaena alciphron;1;Lycaena alciphron;0.999999856207079;  
HQ004639;Lepidoptera;Lycaena alciphron;Lycaena alciphron;1;Lycaena alciphron;0.999999860607612;  
HQ004643;Lepidoptera;Lycaena dispar;Lycaena dispar;1;Lycaena dispar;0.99999990743959;  
HQ004644;Lepidoptera;Lycaena dispar;Lycaena dispar;1;Lycaena dispar;0.99999992566444;  
HQ004645;Lepidoptera;Lycaena dispar;Lycaena dispar;1;Lycaena dispar;0.99999990743959;  
HQ004646;Lepidoptera;Lycaena dispar;Lycaena dispar;1;Lycaena dispar;0.99999990743959;  
HQ004647;Lepidoptera;Lycaena dispar;Lycaena dispar;1;Lycaena dispar;0.99999992566444;  
HQ004648;Lepidoptera;Lycaena dispar;Lycaena dispar;1;Lycaena dispar;0.99999990743959;  
HQ004649;Lepidoptera;Lycaena dispar;Lycaena dispar;1;Lycaena dispar;0.99999990514283;  
HQ004650;Lepidoptera;Lycaena dispar;Lycaena dispar;1;Lycaena dispar;0.99999990743959;  
HQ004651;Lepidoptera;Lycaena dispar;Lycaena dispar;1;Lycaena dispar;0.99999990743959;  
HQ004652;Lepidoptera;Lycaena helle;Lycaena helle;1;Lycaena helle;0.99999993533947;  
HQ004653;Lepidoptera;Helleia helle;Lycaena helle;1;Lycaena helle;0.99999993533947;  
HQ004654;Lepidoptera;Helleia helle;Lycaena helle;1;Lycaena helle;0.99999993533947;  
HQ004655;Lepidoptera;Helleia helle;Lycaena helle;1;Lycaena helle;0.99999993533947;  
HQ004656;Lepidoptera;Helleia helle;Lycaena helle;1;Lycaena helle;0.99999993533947;  
HQ004657;Lepidoptera;Helleia helle;Lycaena helle;1;Lycaena helle;0.99999982106601;  
HQ004658;Lepidoptera;Lycaena hippothoe;NA;NA;Lycaena hippothoe;0.929268253497542;  
HQ004659;Lepidoptera;Lycaena hippothoe;NA;NA;Lycaena hippothoe;0.929268253497542;  
HQ004663;Lepidoptera;Lycaena phlaeas;Lycaena phlaeas;1;Lycaena phlaeas;0.99999994740023;  
HQ004664;Lepidoptera;Lycaena phlaeas;Lycaena phlaeas;1;Lycaena phlaeas;0.99999996363186;  
HQ004665;Lepidoptera;Lycaena phlaeas;Lycaena phlaeas;1;Lycaena phlaeas;0.99999994740023;  
HQ004666;Lepidoptera;Lycaena phlaeas;Lycaena phlaeas;1;Lycaena phlaeas;0.99999994740023;  
HQ004667;Lepidoptera;Lycaena phlaeas;Lycaena phlaeas;1;Lycaena phlaeas;0.99999994740023;  
HQ004668;Lepidoptera;Lycaena phlaeas;Lycaena phlaeas;1;Lycaena phlaeas;0.9999998549427;  
HQ004669;Lepidoptera;Lycaena phlaeas;Lycaena phlaeas;1;Lycaena phlaeas;0.99999995251216;  
HQ004670;Lepidoptera;Lycaena phlaeas;Lycaena phlaeas;1;Lycaena phlaeas;0.99999994740023;  
HQ004671;Lepidoptera;Lycaena phlaeas;Lycaena phlaeas;1;Lycaena phlaeas;0.99999996363186;  
HQ004672;Lepidoptera;Lycaena thersamon;NA;NA;Lycaena thersamon;0.961302670565805;  
HQ004673;Lepidoptera;Lycaena thersamon;NA;NA;Lycaena thersamon;0.961302670565805;  
HQ004674;Lepidoptera;Lycaena thersamon;NA;NA;Lycaena thersamon;0.969135324846213;  
HQ004675;Lepidoptera;Lycaena thersamon;NA;NA;Lycaena thersamon;0.95609400375869;  
HQ004676;Lepidoptera;Lycaena thersamon;NA;NA;Lycaena thersamon;0.961302670565805;  
HQ004677;Lepidoptera;Lycaena thersamon;NA;NA;Lycaena thersamon;0.961302670565805;  
HQ004678;Lepidoptera;Lycaena thersamon;NA;NA;Lycaena thersamon;0.961302670565805;  
HQ004679;Lepidoptera;Lycaena tityrus;Lycaena tityrus;1;Lycaena tityrus;0.999998928238034;  
HQ004680;Lepidoptera;Lycaena tityrus;Lycaena tityrus;1;Lycaena tityrus;0.999999311170153;  
HQ004681;Lepidoptera;Lycaena tityrus;Lycaena tityrus;1;Lycaena tityrus;0.999998928238034;  
HQ004682;Lepidoptera;Lycaena tityrus;Lycaena tityrus;1;Lycaena tityrus;0.999999137688152;  
HQ004683;Lepidoptera;Lycaena tityrus;Lycaena tityrus;1;Lycaena tityrus;0.999999137688152;  
HQ004684;Lepidoptera;Lycaena tityrus;Lycaena tityrus;1;Lycaena tityrus;0.999998928238034;  
HQ004685;Lepidoptera;Lycaena tityrus;Lycaena tityrus;1;Lycaena tityrus;0.999999137688152;  
HQ004686;Lepidoptera;Lycaena tityrus;Lycaena tityrus;1;Lycaena tityrus;0.999997855580031;  
HQ004687;Lepidoptera;Lycaena tityrus;Lycaena tityrus;1;Lycaena tityrus;0.999998928238034;  
HQ004688;Lepidoptera;Lycaena virgaureae;NA;0.186;Lycaena virgaureae;0.999491227342155;  
HQ004689;Lepidoptera;Lycaena virgaureae;Lycaena virgaureae;0.022;Lycaena  
virgaureae;0.998289731831646;  
HQ004690;Lepidoptera;Lycaena virgaureae;NA;0.073;Lycaena virgaureae;0.987335569692494;  
HQ004691;Lepidoptera;Lycaena virgaureae;NA;0.096;Lycaena virgaureae;0.998044906563439;  
HQ004692;Lepidoptera;Lycaena virgaureae;Lycaena virgaureae;0.025;Lycaena  
virgaureae;0.999659709924644;  
HQ004693;Lepidoptera;Lycaena virgaureae;NA;0.067;Lycaena virgaureae;0.999579233710412;  
HQ004694;Lepidoptera;Lycaena virgaureae;Lycaena virgaureae;0.035;Lycaena  
virgaureae;0.999385274911075;  
HQ004695;Lepidoptera;Lycaena virgaureae;Lycaena virgaureae;0.019;Lycaena  
virgaureae;0.999127655949914;  
HQ004707;Lepidoptera;Phengaris arion;NA;0.021;Phengaris arion;0.956663122359086;  
HQ004708;Lepidoptera;Phengaris arion;NA;0.054;Phengaris arion;0.938397095316026;  
HQ004709;Lepidoptera;Phengaris arion;NA;0.054;Phengaris arion;0.938397095316026;  
HQ004710;Lepidoptera;Phengaris arion;NA;0.021;Phengaris arion;0.956663122359086;  
HQ004711;Lepidoptera;Phengaris arion;NA;0.054;Phengaris arion;0.938397095316026;  
HQ004712;Lepidoptera;Phengaris arion;NA;0.054;Phengaris arion;0.938397095316026;  
HQ004713;Lepidoptera;Phengaris arion;NA;0.054;Phengaris arion;0.938397095316026;  
HQ004730;Lepidoptera;Maniola jurtina;NA;0.038;NA;0.99999999999524;  
HQ004731;Lepidoptera;Maniola jurtina;NA;0.074;Maniola jurtina;0.734176111085427;  
HQ004732;Lepidoptera;Maniola jurtina;NA;0.001;NA;0.99999999997362;  
HQ004733;Lepidoptera;Maniola jurtina;NA;0.169;NA;0.99999999999202;  
HQ004740;Lepidoptera;Melanargia galathea;Melanargia galathea;NA;Melanargia  
galathea;0.981855578470499;  
HQ004741;Lepidoptera;Melanargia galathea;Melanargia galathea;NA;Melanargia  
galathea;0.981855578470499;

HQ004742;Lepidoptera;Melanargia galathea;Melanargia galathea;NA;Melanargia galathea;0.981855578470499;  
HQ004743;Lepidoptera;Melanargia galathea;Melanargia galathea;NA;Melanargia galathea;0.981855578470499;  
HQ004772;Lepidoptera;Melitaea britomartis;NA;NA;Melitaea britomartis;0.965147943123453;  
HQ004773;Lepidoptera;Melitaea britomartis;NA;NA;Melitaea britomartis;0.964318779323939;  
HQ004774;Lepidoptera;Melitaea cinxia;Melitaea cinxia;1;Melitaea cinxia;0.999999999999886;  
HQ004775;Lepidoptera;Melitaea cinxia;Melitaea cinxia;1;Melitaea cinxia;0.999999999999488;  
HQ004776;Lepidoptera;Melitaea cinxia;Melitaea cinxia;1;Melitaea cinxia;0.999999999999801;  
HQ004777;Lepidoptera;Melitaea cinxia;Melitaea cinxia;1;Melitaea cinxia;0.999999999999574;  
HQ004778;Lepidoptera;Melitaea cinxia;Melitaea cinxia;1;Melitaea cinxia;0.999999999999488;  
HQ004779;Lepidoptera;Melitaea cinxia;Melitaea cinxia;1;Melitaea cinxia;0.999999999999915;  
HQ004780;Lepidoptera;Melitaea cinxia;Melitaea cinxia;1;Melitaea cinxia;0.999999999999943;  
HQ004781;Lepidoptera;Melitaea cinxia;Melitaea cinxia;1;Melitaea cinxia;0.999999999999488;  
HQ004782;Lepidoptera;Melitaea diamina;NA;0.13;Melitaea diamina;0.999999982010166;  
HQ004783;Lepidoptera;Melitaea diamina;NA;0.048;Melitaea diamina;0.999999987986001;  
HQ004784;Lepidoptera;Melitaea diamina;NA;0.13;Melitaea diamina;0.999999982010166;  
HQ004785;Lepidoptera;Melitaea diamina;NA;0.13;Melitaea diamina;0.999999982010166;  
HQ004786;Lepidoptera;Melitaea diamina;NA;0.13;Melitaea diamina;0.999999982010166;  
HQ004787;Lepidoptera;Melitaea diamina;NA;0.13;Melitaea diamina;0.999999982010166;  
HQ004788;Lepidoptera;Melitaea diamina;NA;0.13;Melitaea diamina;0.999999982010166;  
HQ004789;Lepidoptera;Melitaea didyma;Melitaea didyma;1;Melitaea didyma;0.994623940987323;  
HQ004790;Lepidoptera;Melitaea didyma;Melitaea didyma;1;Melitaea didyma;0.993439843713843;  
HQ004791;Lepidoptera;Melitaea didyma;Melitaea didyma;1;Melitaea didyma;0.993439843713843;  
HQ004792;Lepidoptera;Melitaea didyma;Melitaea didyma;1;Melitaea didyma;0.993439843713843;  
HQ004793;Lepidoptera;Melitaea didyma;Melitaea didyma;1;Melitaea didyma;0.993439843713843;  
HQ004811;Lepidoptera;Melitaea trivia;Melitaea trivia;1;Melitaea trivia;0.999999999960949;  
HQ004812;Lepidoptera;Melitaea trivia;Melitaea trivia;1;Melitaea trivia;0.999999999907146;  
HQ004813;Lepidoptera;Melitaea trivia;Melitaea trivia;1;Melitaea trivia;0.999999999960949;  
HQ004814;Lepidoptera;Melitaea trivia;Melitaea trivia;1;Melitaea trivia;0.999999999877389;  
HQ004815;Lepidoptera;Melitaea trivia;Melitaea trivia;1;Melitaea trivia;0.999999999956572;  
HQ004817;Lepidoptera;Melitaea trivia;Melitaea trivia;1;Melitaea trivia;0.999999999877389;  
HQ004819;Lepidoptera;Minois dryas;NA;0.025;Minois dryas;0.850746026247397;  
HQ004820;Lepidoptera;Minois dryas;NA;0.025;Minois dryas;0.850746026247397;  
HQ004821;Lepidoptera;Minois dryas;NA;0.025;Minois dryas;0.850746026247397;  
HQ004822;Lepidoptera;Minois dryas;NA;0.025;Minois dryas;0.850746026247397;  
HQ004823;Lepidoptera;Minois dryas;NA;0.025;Minois dryas;0.850746026247397;  
HQ004824;Lepidoptera;Minois dryas;NA;0.025;Minois dryas;0.850746026247397;  
HQ004825;Lepidoptera;Minois dryas;NA;0.025;Minois dryas;0.850746026247397;  
HQ004836;Lepidoptera;Favonius quercus;NA;NA;Favonius quercus;0.738637895579293;  
HQ004837;Lepidoptera;Favonius quercus;NA;NA;Favonius quercus;0.729218423035651;  
HQ004838;Lepidoptera;Favonius quercus;NA;NA;Favonius quercus;0.70740331639258;  
HQ004839;Lepidoptera;Favonius quercus;NA;NA;NA;0.999999999999574;  
HQ004858;Lepidoptera;Nymphalis antiopa;NA;0.23;Nymphalis antiopa;0.99999994198096;  
HQ004874;Lepidoptera;Ochlodes sylvanus;NA;0.316;Ochlodes sylvanus;0.996318754838625;  
HQ004875;Lepidoptera;Ochlodes sylvanus;NA;0.316;Ochlodes sylvanus;0.996318754838625;  
HQ004876;Lepidoptera;Ochlodes sylvanus;NA;0.316;Ochlodes sylvanus;0.996318754838625;  
HQ004877;Lepidoptera;Ochlodes sylvanus;NA;0.316;Ochlodes sylvanus;0.996318754838625;  
HQ004878;Lepidoptera;Ochlodes sylvanus;NA;0.316;Ochlodes sylvanus;0.996318754838625;  
HQ004879;Lepidoptera;Ochlodes sylvanus;NA;0.316;Ochlodes sylvanus;0.996318754838625;  
HQ004880;Lepidoptera;Ochlodes sylvanus;NA;0.316;Ochlodes sylvanus;0.996318754838625;  
HQ004881;Lepidoptera;Ochlodes sylvanus;NA;0.316;Ochlodes sylvanus;0.996318754838625;  
HQ004882;Lepidoptera;Ochlodes sylvanus;NA;0.316;Ochlodes sylvanus;0.996318754838625;  
HQ004883;Lepidoptera;Ochlodes sylvanus;NA;0.316;Ochlodes sylvanus;0.996318754838625;  
HQ004891;Lepidoptera;Pararge aegeria;Pararge aegeria;1;Pararge aegeria;0.99999999806874;  
HQ004892;Lepidoptera;Pararge aegeria;Pararge aegeria;1;Pararge aegeria;0.99999999836319;  
HQ004893;Lepidoptera;Pararge aegeria;Pararge aegeria;1;Pararge aegeria;0.99999999963165;  
HQ004894;Lepidoptera;Pararge aegeria;Pararge aegeria;1;Pararge aegeria;0.99999999930424;  
HQ004895;Lepidoptera;Pararge aegeria;Pararge aegeria;1;Pararge aegeria;0.99999999836319;  
HQ004896;Lepidoptera;Pararge aegeria;Pararge aegeria;1;Pararge aegeria;0.99999999963165;  
HQ004897;Lepidoptera;Pararge aegeria;Pararge aegeria;1;Pararge aegeria;0.99999999904645;  
HQ004898;Lepidoptera;Pararge aegeria;Pararge aegeria;1;Pararge aegeria;0.99999999963165;  
HQ004899;Lepidoptera;Pararge aegeria;Pararge aegeria;1;Pararge aegeria;0.99999999836319;  
HQ004900;Lepidoptera;Parnassius apollo;Parnassius apollo;1;Parnassius apollo;0.999611380084422;  
HQ004901;Lepidoptera;Parnassius apollo;Parnassius apollo;0.001;Parnassius apollo;0.9652975019949;  
HQ004902;Lepidoptera;Parnassius mnemosyne;Parnassius mnemosyne;1;Parnassius mnemosyne;0.999999789823726;  
HQ004903;Lepidoptera;Parnassius mnemosyne;Parnassius mnemosyne;1;Parnassius mnemosyne;0.999999761646734;  
HQ004904;Lepidoptera;Parnassius mnemosyne;Parnassius mnemosyne;1;Parnassius mnemosyne;0.999999761646734;  
HQ004905;Lepidoptera;Parnassius mnemosyne;Parnassius mnemosyne;1;Parnassius mnemosyne;0.999999761646734;  
HQ004906;Lepidoptera;Parnassius mnemosyne;Parnassius mnemosyne;1;Parnassius mnemosyne;0.999999761646734;  
HQ004907;Lepidoptera;Parnassius mnemosyne;Parnassius mnemosyne;1;Parnassius mnemosyne;0.999999458035068;

HQ004908;Lepidoptera;Parnassius mnemosyne;Parnassius mnemosyne;1;Parnassius mnemosyne;0.999999766845291;  
HQ004909;Lepidoptera;Parnassius mnemosyne;Parnassius mnemosyne;1;Parnassius mnemosyne;0.999999751412392;  
HQ004910;Lepidoptera;Parnassius mnemosyne;Parnassius mnemosyne;1;Parnassius mnemosyne;0.999999761646734;  
HQ004911;Lepidoptera;Parnassius mnemosyne;Parnassius mnemosyne;1;Parnassius mnemosyne;0.999999761646734;  
HQ004939;Lepidoptera;Pieris napi;NA;NA;NA;100.000.000.000.001;  
HQ004940;Lepidoptera;Pieris napi;NA;0.011;Pieris napi;0.801985394724814;  
HQ004941;Lepidoptera;Pieris napi;NA;0.011;Pieris napi;0.801985394724814;  
HQ004942;Lepidoptera;Pieris napi;NA;0.028;Pieris napi;0.888205720664699;  
HQ004943;Lepidoptera;Pieris napi;NA;0.066;Pieris napi;0.832895481558215;  
HQ004944;Lepidoptera;Pieris napi;NA;0.011;Pieris napi;0.911140198650123;  
HQ004945;Lepidoptera;Pieris napi;NA;0.028;Pieris napi;0.888205720664699;  
HQ004946;Lepidoptera;Pieris napi;NA;0.028;Pieris napi;0.888205720664699;  
HQ004947;Lepidoptera;Pieris napi;NA;0.084;Pieris napi;0.885343420349066;  
HQ004948;Lepidoptera;Pieris napi;NA;0.011;Pieris napi;0.801985394724814;  
HQ004949;Lepidoptera;Pieris napi;NA;0.004;Pieris napi;0.759767822852292;  
HQ004950;Lepidoptera;Pieris napi;NA;0.011;Pieris napi;0.801985394724814;  
HQ004951;Lepidoptera;Pieris napi;NA;0.001;NA;0.999999999999955;  
HQ004952;Lepidoptera;Pieris napi;NA;0.084;Pieris napi;0.885343420349066;  
HQ004963;Lepidoptera;Plebejus argus;NA;0.123;Plebejus argus;0.980927835351298;  
HQ004964;Lepidoptera;Plebejus argus;NA;0.123;Plebejus argus;0.980927835351298;  
HQ004965;Lepidoptera;Plebejus argus;NA;0.123;Plebejus argus;0.980927835351298;  
HQ004966;Lepidoptera;Plebejus argus;NA;NA;Plebejus argus;0.973283205133445;  
HQ004967;Lepidoptera;Plebejus argus;NA;0.123;Plebejus argus;0.980927835351298;  
HQ004968;Lepidoptera;Plebejus argus;NA;0.123;Plebejus argus;0.980927835351298;  
HQ004969;Lepidoptera;Plebejus argus;NA;0.049;Plebejus argus;0.964369635730701;  
HQ004970;Lepidoptera;Plebejus argus;NA;0.123;Plebejus argus;0.980927835351298;  
HQ004971;Lepidoptera;Plebejus argus;NA;0.123;Plebejus argus;0.980927835351298;  
HQ004972;Lepidoptera;Plebejus argus;NA;0.123;Plebejus argus;0.980927835351298;  
HQ004973;Lepidoptera;Plebejus argus;NA;0.328;Plebejus argus;0.969789734199889;  
HQ004974;Lepidoptera;Plebejus argus;NA;0.04;Plebejus argus;0.980859624104987;  
HQ004975;Lepidoptera;Plebejus argus;NA;0.177;Plebejus argus;0.976301485545538;  
HQ004976;Lepidoptera;Plebejus argus;NA;0.177;Plebejus argus;0.976301485545538;  
HQ004977;Lepidoptera;Plebejus argyrognomon;NA;0.001;NA;0.994620093546684;  
HQ004978;Lepidoptera;Plebejus argyrognomon;NA;0.002;NA;0.996348696700873;  
HQ004979;Lepidoptera;Plebejus argyrognomon;NA;0.001;NA;0.994620093546684;  
HQ004980;Lepidoptera;Plebejus argyrognomon;NA;0.001;NA;0.994620093546684;  
HQ004981;Lepidoptera;Plebejus argyrognomon;NA;0.001;NA;0.994620093546684;  
HQ004982;Lepidoptera;Plebejus argyrognomon;NA;0.001;NA;0.994620093546684;  
HQ004983;Lepidoptera;Plebejus argyrognomon;NA;0.001;NA;0.994620093546684;  
HQ004984;Lepidoptera;Plebejus argyrognomon;NA;0.001;NA;0.994620093546684;  
HQ004985;Lepidoptera;Plebejus argyrognomon;NA;0.001;NA;0.994620093546684;  
HQ004986;Lepidoptera;Plebejus argyrognomon;NA;0.001;NA;0.994620093546684;  
HQ004987;Lepidoptera;Plebejus argyrognomon;NA;0.001;NA;0.994620093546684;  
HQ004988;Lepidoptera;Plebejus argyrognomon;NA;0.001;NA;0.994620093546684;  
HQ004989;Lepidoptera;Plebejus argyrognomon;NA;0.001;NA;0.994620093546684;  
HQ004990;Lepidoptera;Plebejus argyrognomon;NA;0.001;NA;0.994620093546684;  
HQ004991;Lepidoptera;Plebejus argyrognomon;NA;0.001;NA;0.994620093546684;  
HQ004992;Lepidoptera;Plebejus idas;NA;0.007;NA;0.999546324331549;  
HQ004993;Lepidoptera;Plebejus idas;NA;0.007;NA;0.999546324331549;  
HQ005002;Lepidoptera;Nymphalis c-album;NA;0.215;NA;0.999999192918557;  
HQ005003;Lepidoptera;Nymphalis c-album;NA;0.215;NA;0.999999192918557;  
HQ005004;Lepidoptera;Nymphalis c-album;NA;0.215;NA;0.999999192918557;  
HQ005005;Lepidoptera;Nymphalis c-album;NA;0.215;NA;0.999999192918557;  
HQ005006;Lepidoptera;Nymphalis c-album;NA;0.215;NA;0.999999192918557;  
HQ005007;Lepidoptera;Nymphalis c-album;NA;0.215;NA;0.999999192918557;  
HQ005008;Lepidoptera;Nymphalis c-album;NA;0.215;NA;0.999999192918557;  
HQ005009;Lepidoptera;Polyommatus amandus;Polyommatus amandus;0.002;Polyommatus amandus;0.999986997208719;  
HQ005020;Lepidoptera;Lysandra coridon;Lysandra coridon;NA;Lysandra coridon;0.735779770406819;  
HQ005021;Lepidoptera;Lysandra coridon;NA;NA;Lysandra coridon;0.754269905766234;  
HQ005022;Lepidoptera;Lysandra coridon;NA;NA;Lysandra coridon;0.754269905766234;  
HQ005023;Lepidoptera;Lysandra coridon;Lysandra coridon;NA;Lysandra coridon;0.735779770406819;  
HQ005024;Lepidoptera;Lysandra coridon;Lysandra coridon;NA;Lysandra coridon;0.735779770406819;  
HQ005025;Lepidoptera;Lysandra coridon;Lysandra coridon;NA;Lysandra coridon;0.868131209180917;  
HQ005026;Lepidoptera;Lysandra coridon;NA;NA;Lysandra coridon;0.792716649139017;  
HQ005027;Lepidoptera;Lysandra coridon;Lysandra coridon;NA;Lysandra coridon;0.735779770406819;  
HQ005028;Lepidoptera;Lysandra coridon;Lysandra coridon;NA;Lysandra coridon;0.730574181508556;  
HQ005029;Lepidoptera;Lysandra coridon;Lysandra coridon;NA;Lysandra coridon;0.735779770406819;  
HQ005030;Lepidoptera;Lysandra coridon;NA;NA;NA;0.998946018519232;  
HQ005032;Lepidoptera;Polyommatus daphnis;NA;0.06;Polyommatus daphnis;0.994947425490863;  
HQ005033;Lepidoptera;Polyommatus daphnis;NA;0.062;Polyommatus daphnis;0.995724017767077;  
HQ005034;Lepidoptera;Polyommatus daphnis;Polyommatus daphnis;0.028;Polyommatus daphnis;0.994856508659724;



HQ005035;Lepidoptera;Polyommatus daphnis;Polyommatus daphnis;0.023;Polyommatus daphnis;0.997907000385637;  
HQ005036;Lepidoptera;Polyommatus daphnis;NA;0.002;Polyommatus daphnis;0.991545923418825;  
HQ005037;Lepidoptera;Polyommatus daphnis;NA;0.163;Polyommatus daphnis;0.992967582982541;  
HQ005038;Lepidoptera;Polyommatus dorylas;Polyommatus dorylas;0.001;Polyommatus dorylas;0.994481388857129;  
HQ005039;Lepidoptera;Polyommatus dorylas;Polyommatus dorylas;0.008;Polyommatus dorylas;0.991281865899703;  
HQ005040;Lepidoptera;Polyommatus dorylas;Polyommatus dorylas;0.008;Polyommatus dorylas;0.991281865899703;  
HQ005041;Lepidoptera;Polyommatus dorylas;Polyommatus dorylas;0.008;Polyommatus dorylas;0.991281865899703;  
HQ005042;Lepidoptera;Polyommatus dorylas;NA;0.002;Polyommatus dorylas;0.994430327300235;  
HQ005043;Lepidoptera;Polyommatus dorylas;Polyommatus dorylas;0.008;Polyommatus dorylas;0.991281865899703;  
HQ005044;Lepidoptera;Polyommatus dorylas;Polyommatus dorylas;0.008;Polyommatus dorylas;0.991281865899703;  
HQ005045;Lepidoptera;Polyommatus dorylas;Polyommatus dorylas;0.008;Polyommatus dorylas;0.991281865899703;  
HQ005046;Lepidoptera;Polyommatus icarus;NA;0.13;Polyommatus icarus;0.979762695748748;  
HQ005047;Lepidoptera;Polyommatus icarus;NA;0.003;Polyommatus icarus;0.998348220031726;  
HQ005048;Lepidoptera;Polyommatus icarus;NA;0.001;Polyommatus icarus;0.974455446201716;  
HQ005049;Lepidoptera;Polyommatus icarus;NA;0.003;Polyommatus icarus;0.998348220031726;  
HQ005050;Lepidoptera;Polyommatus icarus;NA;0.13;Polyommatus icarus;0.979762695748748;  
HQ005051;Lepidoptera;Polyommatus icarus;NA;0.002;Polyommatus icarus;0.988825959464389;  
HQ005052;Lepidoptera;Polyommatus icarus;NA;0.003;Polyommatus icarus;0.998348220031726;  
HQ005053;Lepidoptera;Polyommatus icarus;NA;0.13;Polyommatus icarus;0.979762695748748;  
HQ005054;Lepidoptera;Polyommatus icarus;NA;0.002;Polyommatus icarus;0.997043403297368;  
HQ005055;Lepidoptera;Polyommatus icarus;Polyommatus icarus;0.027;Polyommatus icarus;0.985218928807075;  
HQ005056;Lepidoptera;Polyommatus icarus;NA;0.13;Polyommatus icarus;0.979762695748748;  
HQ005057;Lepidoptera;Polyommatus thersites;NA;0.11;Polyommatus thersites;0.999999518928236;  
HQ005058;Lepidoptera;Polyommatus thersites;NA;0.33;Polyommatus thersites;0.999999477278829;  
HQ005059;Lepidoptera;Polyommatus thersites;NA;0.066;Polyommatus thersites;0.999998480644439;  
HQ005060;Lepidoptera;Polyommatus thersites;NA;NA;Polyommatus thersites;0.999999041958266;  
HQ005061;Lepidoptera;Polyommatus thersites;Polyommatus thersites;0.001;Polyommatus thersites;0.999999937179697;  
HQ005062;Lepidoptera;Polyommatus thersites;NA;NA;Polyommatus thersites;0.999999041958266;  
HQ005091;Lepidoptera;Pyrgus alveus;NA;NA;Pyrgus alveus;0.941697735568124;  
HQ005092;Lepidoptera;Pyrgus alveus;NA;NA;Pyrgus alveus;0.941697735568124;  
HQ005093;Lepidoptera;Pyrgus alveus;NA;NA;Pyrgus alveus;0.941697735568124;  
HQ005094;Lepidoptera;Pyrgus alveus;NA;NA;Pyrgus alveus;0.941697735568124;  
HQ005095;Lepidoptera;Pyrgus alveus;NA;NA;Pyrgus alveus;0.941697735568124;  
HQ005096;Lepidoptera;Pyrgus andromedae;Pyrgus andromedae;1;Pyrgus andromedae;0.999808671605833;  
HQ005097;Lepidoptera;Pyrgus andromedae;Pyrgus andromedae;0.001;Pyrgus andromedae;0.997740560982143;  
HQ005098;Lepidoptera;Pyrgus andromedae;Pyrgus andromedae;1;Pyrgus andromedae;0.999980225955564;  
HQ005099;Lepidoptera;Pyrgus armoricanus;Pyrgus armoricanus;1;Pyrgus armoricanus;0.99999858288849;  
HQ005100;Lepidoptera;Pyrgus armoricanus;Pyrgus armoricanus;1;Pyrgus armoricanus;0.999997353848817;  
HQ005101;Lepidoptera;Pyrgus armoricanus;Pyrgus armoricanus;1;Pyrgus armoricanus;0.999997353848817;  
HQ005102;Lepidoptera;Pyrgus armoricanus;Pyrgus armoricanus;1;Pyrgus armoricanus;0.999997353848817;  
HQ005103;Lepidoptera;Pyrgus armoricanus;Pyrgus armoricanus;1;Pyrgus armoricanus;0.999997353848817;  
HQ005104;Lepidoptera;Pyrgus armoricanus;Pyrgus armoricanus;1;Pyrgus armoricanus;0.999997353848817;  
HQ005105;Lepidoptera;Pyrgus armoricanus;Pyrgus armoricanus;1;Pyrgus armoricanus;0.999997353848817;  
HQ005106;Lepidoptera;Pyrgus armoricanus;Pyrgus armoricanus;1;Pyrgus armoricanus;0.997478680096412;  
HQ005107;Lepidoptera;Pyrgus armoricanus;Pyrgus armoricanus;1;Pyrgus armoricanus;0.999997353848817;  
HQ005108;Lepidoptera;Pyrgus armoricanus;Pyrgus armoricanus;1;Pyrgus armoricanus;0.99999858288849;  
HQ005109;Lepidoptera;Pyrgus armoricanus;Pyrgus armoricanus;1;Pyrgus armoricanus;0.997478680096412;  
HQ005110;Lepidoptera;Pyrgus armoricanus;Pyrgus armoricanus;1;Pyrgus armoricanus;0.999997637345223;  
HQ005111;Lepidoptera;Pyrgus armoricanus;Pyrgus armoricanus;1;Pyrgus armoricanus;0.999997353848817;  
HQ005112;Lepidoptera;Pyrgus armoricanus;Pyrgus armoricanus;1;Pyrgus armoricanus;0.997478680096412;  
HQ005113;Lepidoptera;Pyrgus armoricanus;Pyrgus armoricanus;1;Pyrgus armoricanus;0.999997353848817;

HQ005114;Lepidoptera;Pyrgus armoricanus;Pyrgus armoricanus;1;Pyrgus armoricanus;0.999997353848817;  
HQ005115;Lepidoptera;Pyrgus armoricanus;Pyrgus armoricanus;1;Pyrgus armoricanus;0.999997353848817;  
HQ005116;Lepidoptera;Pyrgus armoricanus;Pyrgus armoricanus;1;Pyrgus armoricanus;0.999997353848817;  
HQ005117;Lepidoptera;Pyrgus armoricanus;Pyrgus armoricanus;1;Pyrgus armoricanus;0.999997353848817;  
HQ005118;Lepidoptera;Pyrgus armoricanus;Pyrgus armoricanus;1;Pyrgus armoricanus;0.999997353848817;  
HQ005119;Lepidoptera;Pyrgus armoricanus;Pyrgus armoricanus;1;Pyrgus armoricanus;0.999997353848817;  
HQ005120;Lepidoptera;Pyrgus armoricanus;Pyrgus armoricanus;1;Pyrgus armoricanus;0.999997353848817;  
HQ005121;Lepidoptera;Pyrgus armoricanus;Pyrgus armoricanus;1;Pyrgus armoricanus;0.997478680096412;  
HQ005122;Lepidoptera;Pyrgus cacaliae;Pyrgus cacaliae;1;Pyrgus cacaliae;0.996034079665744;  
HQ005123;Lepidoptera;Pyrgus cacaliae;Pyrgus cacaliae;1;Pyrgus cacaliae;0.996034079665744;  
HQ005124;Lepidoptera;Pyrgus cacaliae;Pyrgus cacaliae;1;Pyrgus cacaliae;0.998409529296952;  
HQ005125;Lepidoptera;Pyrgus carthami;Pyrgus carthami;1;Pyrgus carthami;0.999947683373648;  
HQ005126;Lepidoptera;Pyrgus carthami;Pyrgus carthami;1;Pyrgus carthami;0.999990719819382;  
HQ005127;Lepidoptera;Pyrgus carthami;Pyrgus carthami;1;Pyrgus carthami;0.999990719819382;  
HQ005128;Lepidoptera;Pyrgus carthami;Pyrgus carthami;1;Pyrgus carthami;0.999990719819382;  
HQ005129;Lepidoptera;Pyrgus carthami;Pyrgus carthami;1;Pyrgus carthami;0.999990719819382;  
HQ005130;Lepidoptera;Pyrgus carthami;Pyrgus carthami;1;Pyrgus carthami;0.999990719819382;  
HQ005131;Lepidoptera;Pyrgus carthami;Pyrgus carthami;1;Pyrgus carthami;0.999990719819382;  
HQ005132;Lepidoptera;Pyrgus malvae;Pyrgus malvae;0.999;Pyrgus malvae;0.993531783407179;  
HQ005133;Lepidoptera;Pyrgus malvae;Pyrgus malvae;0.999;Pyrgus malvae;0.993531783407179;  
HQ005134;Lepidoptera;Pyrgus malvae;Pyrgus malvae;0.003;Pyrgus malvae;0.993890103151852;  
HQ005135;Lepidoptera;Pyrgus malvae;Pyrgus malvae;NA;Pyrgus malvae;0.980121140374433;  
HQ005136;Lepidoptera;Pyrgus malvae;Pyrgus malvae;0.999;Pyrgus malvae;0.993531783407179;  
HQ005137;Lepidoptera;Pyrgus malvae;Pyrgus malvae;0.999;Pyrgus malvae;0.993531783407179;  
HQ005138;Lepidoptera;Pyrgus malvae;NA;NA;Pyrgus malvae;0.992160992679828;  
HQ005139;Lepidoptera;Pyrgus malvae;Pyrgus malvae;0.999;Pyrgus malvae;0.993531783407179;  
HQ005140;Lepidoptera;Pyrgus malvae;Pyrgus malvae;0.999;Pyrgus malvae;0.993531783407179;  
HQ005143;Lepidoptera;Pyrgus sidae;Pyrgus sidae;1;Pyrgus sidae;0.99996750457282;  
HQ005145;Lepidoptera;Pyrgus sidae;Pyrgus sidae;1;Pyrgus sidae;0.99996750457282;  
HQ005146;Lepidoptera;Pyrgus sidae;Pyrgus sidae;1;Pyrgus sidae;0.99996750457282;  
HQ005147;Lepidoptera;Pyrgus sidae;Pyrgus sidae;1;Pyrgus sidae;0.999993489463113;  
HQ005148;Lepidoptera;Maniola tithonus;Pyronia tithonus;1;Pyronia tithonus;1;  
HQ005149;Lepidoptera;Maniola tithonus;Pyronia tithonus;1;Pyronia tithonus;1;  
HQ005150;Lepidoptera;Maniola tithonus;Pyronia tithonus;1;Pyronia tithonus;1;  
HQ005151;Lepidoptera;Maniola tithonus;Pyronia tithonus;NA;Pyronia tithonus;1;  
HQ005152;Lepidoptera;Maniola tithonus;Pyronia tithonus;1;Pyronia tithonus;1;  
HQ005153;Lepidoptera;Maniola tithonus;Pyronia tithonus;1;Pyronia tithonus;1;  
HQ005154;Lepidoptera;Maniola tithonus;Pyronia tithonus;NA;Pyronia tithonus;1;  
HQ005155;Lepidoptera;Maniola tithonus;Pyronia tithonus;1;Pyronia tithonus;1;  
HQ005156;Lepidoptera;Satyrium acaciae;Satyrium acaciae;1;Satyrium acaciae;0.999999965189347;  
HQ005157;Lepidoptera;Satyrium acaciae;Satyrium acaciae;1;Satyrium acaciae;0.999999951077798;  
HQ005158;Lepidoptera;Satyrium acaciae;Satyrium acaciae;1;Satyrium acaciae;0.999999906035616;  
HQ005159;Lepidoptera;Satyrium acaciae;Satyrium acaciae;1;Satyrium acaciae;0.999999951077798;  
HQ005160;Lepidoptera;Satyrium acaciae;Satyrium acaciae;1;Satyrium acaciae;0.999999951077798;  
HQ005161;Lepidoptera;Satyrium acaciae;Satyrium acaciae;1;Satyrium acaciae;0.999999951077798;  
HQ005162;Lepidoptera;Satyrium acaciae;Satyrium acaciae;1;Satyrium acaciae;0.999999951077798;  
HQ005163;Lepidoptera;Satyrium acaciae;Satyrium acaciae;1;Satyrium acaciae;0.999999951077798;  
HQ005164;Lepidoptera;Satyrium acaciae;Satyrium acaciae;1;Satyrium acaciae;0.999999951077798;  
HQ005165;Lepidoptera;Satyrium acaciae;Satyrium acaciae;1;Satyrium acaciae;0.999999951077798;  
HQ005166;Lepidoptera;Satyrium acaciae;Satyrium acaciae;1;Satyrium acaciae;0.999999951077798;  
HQ005167;Lepidoptera;Satyrium ilicis;Satyrium ilicis;1;Satyrium ilicis;0.999999939891298;  
HQ005168;Lepidoptera;Satyrium ilicis;Satyrium ilicis;1;Satyrium ilicis;0.99999991601669;  
HQ005169;Lepidoptera;Satyrium ilicis;Satyrium ilicis;1;Satyrium ilicis;0.99999987901305;  
HQ005170;Lepidoptera;Satyrium ilicis;Satyrium ilicis;1;Satyrium ilicis;0.999999963901758;  
HQ005171;Lepidoptera;Satyrium ilicis;Satyrium ilicis;1;Satyrium ilicis;0.999999963901758;  
HQ005172;Lepidoptera;Satyrium ilicis;Satyrium ilicis;1;Satyrium ilicis;0.99999991394333;  
HQ005173;Lepidoptera;Satyrium ilicis;Satyrium ilicis;1;Satyrium ilicis;0.99999987901305;  
HQ005174;Lepidoptera;Satyrium pruni;NA;0.076;Satyrium pruni;0.990322364021655;  
HQ005175;Lepidoptera;Satyrium pruni;NA;0.32;Satyrium pruni;0.993871422369024;  
HQ005176;Lepidoptera;Satyrium pruni;NA;0.076;Satyrium pruni;0.990322364021655;  
HQ005177;Lepidoptera;Satyrium pruni;NA;0.076;Satyrium pruni;0.990322364021655;  
HQ005178;Lepidoptera;Satyrium pruni;NA;0.32;Satyrium pruni;0.993871422369024;  
HQ005179;Lepidoptera;Satyrium pruni;NA;0.32;Satyrium pruni;0.993871422369024;  
HQ005180;Lepidoptera;Satyrium pruni;NA;0.076;Satyrium pruni;0.990322364021655;  
HQ005181;Lepidoptera;Satyrium pruni;NA;0.076;Satyrium pruni;0.990322364021655;  
HQ005182;Lepidoptera;Satyrium spini;Satyrium spini;1;Satyrium spini;0.999998550843001;  
HQ005183;Lepidoptera;Satyrium spini;Satyrium spini;1;Satyrium spini;0.999999403222667;  
HQ005184;Lepidoptera;Satyrium spini;Satyrium spini;1;Satyrium spini;0.999996396739488;  
HQ005185;Lepidoptera;Satyrium spini;Satyrium spini;1;Satyrium spini;0.999998891040736;  
HQ005186;Lepidoptera;Satyrium spini;Satyrium spini;1;Satyrium spini;0.999998428727123;

HQ005187;Lepidoptera;Satyrium spini;Satyrium spini;1;Satyrium spini;0.999999390354945;  
HQ005188;Lepidoptera;Satyrium spini;Satyrium spini;1;Satyrium spini;0.999999352481961;  
HQ005189;Lepidoptera;Satyrium spini;Satyrium spini;1;Satyrium spini;0.999998550843001;  
HQ005190;Lepidoptera;Satyrium w-album;NA;0.056;Satyrium w-album;0.989378230996316;  
HQ005191;Lepidoptera;Satyrium w-album;NA;0.056;Satyrium w-album;0.989378230996316;  
HQ005192;Lepidoptera;Satyrium w-album;NA;0.056;Satyrium w-album;0.989378230996316;  
HQ005193;Lepidoptera;Satyrium w-album;NA;0.056;Satyrium w-album;0.989378230996316;  
HQ005194;Lepidoptera;Satyrium w-album;NA;0.056;Satyrium w-album;0.989378230996316;  
HQ005195;Lepidoptera;Scolitantides orion;Scolitantides orion;1;Scolitantides  
orion;0.99999984804305;  
HQ005196;Lepidoptera;Scolitantides orion;Scolitantides orion;1;Scolitantides  
orion;0.9999997690378;  
HQ005197;Lepidoptera;Scolitantides orion;Scolitantides orion;1;Scolitantides  
orion;0.99999984804305;  
HQ005198;Lepidoptera;Scolitantides orion;Scolitantides orion;1;Scolitantides  
orion;0.99999984804305;  
HQ005199;Lepidoptera;Scolitantides orion;Scolitantides orion;1;Scolitantides  
orion;0.99999984804305;  
HQ005200;Lepidoptera;Scolitantides orion;Scolitantides orion;1;Scolitantides  
orion;0.99999984804305;  
HQ005201;Lepidoptera;Scolitantides orion;Scolitantides orion;1;Scolitantides  
orion;0.99999984804305;  
HQ005212;Lepidoptera;Thecla betulae;Thecla betulae;1;Thecla betulae;0.99999999955833;  
HQ005213;Lepidoptera;Thecla betulae;Thecla betulae;1;Thecla betulae;0.99999999896204;  
HQ005214;Lepidoptera;Thecla betulae;Thecla betulae;1;Thecla betulae;0.99999999974392;  
HQ005215;Lepidoptera;Thecla betulae;Thecla betulae;1;Thecla betulae;0.99999999974392;  
HQ005216;Lepidoptera;Thecla betulae;Thecla betulae;1;Thecla betulae;0.99999999956742;  
HQ005217;Lepidoptera;Thecla betulae;Thecla betulae;1;Thecla betulae;0.99999999961119;  
HQ005218;Lepidoptera;Thecla betulae;Thecla betulae;1;Thecla betulae;0.99999999974818;  
HQ005219;Lepidoptera;Thymelicus acteon;Thymelicus acteon;1;Thymelicus acteon;0.99999997710063;  
HQ005220;Lepidoptera;Thymelicus acteon;Thymelicus acteon;1;Thymelicus acteon;0.9999999752248;  
HQ005221;Lepidoptera;Thymelicus acteon;Thymelicus acteon;1;Thymelicus acteon;0.99999995105014;  
HQ005222;Lepidoptera;Thymelicus lineola;Thymelicus lineola;1;Thymelicus  
lineola;0.999982844978955;  
HQ005223;Lepidoptera;Thymelicus lineola;Thymelicus lineola;1;Thymelicus  
lineola;0.999982844978955;  
HQ005224;Lepidoptera;Thymelicus lineola;Thymelicus lineola;1;Thymelicus  
lineola;0.999982844978955;  
HQ005225;Lepidoptera;Thymelicus lineola;Thymelicus lineola;1;Thymelicus  
lineola;0.999971535093703;  
HQ005226;Lepidoptera;Thymelicus lineola;Thymelicus lineola;1;Thymelicus  
lineola;0.99996903931991;  
HQ005227;Lepidoptera;Thymelicus lineola;Thymelicus lineola;1;Thymelicus  
lineola;0.99996416095097;  
HQ005228;Lepidoptera;Thymelicus sylvestris;Thymelicus sylvestris;1;Thymelicus  
sylvestris;0.99999876153052;  
HQ005229;Lepidoptera;Thymelicus sylvestris;Thymelicus sylvestris;1;Thymelicus  
sylvestris;0.99999665642118;  
HQ005230;Lepidoptera;Thymelicus sylvestris;NA;0.324;Thymelicus sylvestris;0.999940778442454;  
HQ005231;Lepidoptera;Thymelicus sylvestris;Thymelicus sylvestris;1;Thymelicus  
sylvestris;0.99999876153052;  
HQ005232;Lepidoptera;Thymelicus sylvestris;Thymelicus sylvestris;1;Thymelicus  
sylvestris;0.99999665642118;  
HQ005233;Lepidoptera;Thymelicus sylvestris;Thymelicus sylvestris;1;Thymelicus  
sylvestris;0.99999665642118;  
HQ005234;Lepidoptera;Thymelicus sylvestris;NA;0.324;Thymelicus sylvestris;0.999940778442454;  
HQ005235;Lepidoptera;Thymelicus sylvestris;NA;0.324;Thymelicus sylvestris;0.999940778442454;  
HQ005236;Lepidoptera;Thymelicus sylvestris;Thymelicus sylvestris;1;Thymelicus  
sylvestris;0.99999876153052;  
HQ005237;Lepidoptera;Thymelicus sylvestris;NA;0.324;Thymelicus sylvestris;0.999940778442454;  
HQ005238;Lepidoptera;Thymelicus sylvestris;NA;0.324;Thymelicus sylvestris;0.999940778442454;  
HQ005239;Lepidoptera;Thymelicus sylvestris;NA;0.324;Thymelicus sylvestris;0.999940778442454;  
HQ005240;Lepidoptera;Thymelicus sylvestris;Thymelicus sylvestris;1;Thymelicus  
sylvestris;0.999998759716989;  
HQ005241;Lepidoptera;Thymelicus sylvestris;NA;0.135;Thymelicus sylvestris;0.999944477624781;  
HQ005242;Lepidoptera;Thymelicus sylvestris;NA;0.131;Thymelicus sylvestris;0.999961574491035;  
HQ005243;Lepidoptera;Thymelicus sylvestris;Thymelicus sylvestris;1;Thymelicus  
sylvestris;0.99999876153052;  
HQ005244;Lepidoptera;Thymelicus sylvestris;NA;0.131;Thymelicus sylvestris;0.999961574491035;  
HQ005247;Lepidoptera;Vanessa atalanta;Vanessa atalanta;1;Vanessa atalanta;0.99999999757762;  
HQ005248;Lepidoptera;Vanessa atalanta;Vanessa atalanta;1;Vanessa atalanta;0.99999999757762;  
HQ005249;Lepidoptera;Vanessa atalanta;Vanessa atalanta;1;Vanessa atalanta;0.99999999757762;  
HQ005250;Lepidoptera;Vanessa atalanta;Vanessa atalanta;1;Vanessa atalanta;0.99999999757762;  
HQ005251;Lepidoptera;Vanessa atalanta;Vanessa atalanta;1;Vanessa atalanta;0.9999999952658;  
HQ005252;Lepidoptera;Vanessa atalanta;Vanessa atalanta;1;Vanessa atalanta;0.99999999669399;  
HQ005253;Lepidoptera;Vanessa atalanta;Vanessa atalanta;1;Vanessa atalanta;0.99999999751964;  
HQ005254;Lepidoptera;Vanessa atalanta;Vanessa atalanta;1;Vanessa atalanta;0.99999999383476;  
HQ005255;Lepidoptera;Vanessa atalanta;Vanessa atalanta;1;Vanessa atalanta;0.99999999757762;

HQ005256;Lepidoptera;Vanessa cardui;Vanessa cardui;1;Vanessa cardui;0.999999803450484;  
HQ005257;Lepidoptera;Vanessa cardui;Vanessa cardui;1;Vanessa cardui;0.999999459983318;  
HQ005258;Lepidoptera;Vanessa cardui;Vanessa cardui;1;Vanessa cardui;0.999999803450484;  
HQ005259;Lepidoptera;Vanessa cardui;Vanessa cardui;1;Vanessa cardui;0.999999459983318;  
HQ005260;Lepidoptera;Vanessa cardui;Vanessa cardui;1;Vanessa cardui;0.999999803450484;  
HQ562781;Lepidoptera;Melitaea didyma;Melitaea didyma;1;Melitaea didyma;0.99976480414171;  
HQ562782;Lepidoptera;Melitaea didyma;Melitaea didyma;1;Melitaea didyma;0.99976480414171;  
HQ562783;Lepidoptera;Melitaea didyma;Melitaea didyma;1;Melitaea didyma;0.999515490426369;  
HQ562784;Lepidoptera;Favonius quercus;NA;NA;Favonius quercus;0.754098981100012;  
HQ562785;Lepidoptera;Carcharodus alceae;Carcharodus alceae;1;Carcharodus  
alceae;0.99999998465938;  
HQ562786;Lepidoptera;Carterocephalus palaemon;NA;0.052;Carterocephalus  
palaemon;0.728445051795325;  
HQ563537;Lepidoptera;Erebia tyndarus;NA;NA;NA;0.999999999999923;  
HQ563538;Lepidoptera;Aricia agestis;NA;0.253;Aricia agestis;0.996350017387504;  
HQ563539;Lepidoptera;Pyrgus alveus;NA;0.003;NA;0.999999999997732;  
HQ563540;Lepidoptera;Erebia tyndarus;NA;NA;NA;0.999999999999923;  
HQ563541;Lepidoptera;Aricia artaxerxes;Plebejus argus;1;Aricia artaxerxes;0.999743187199922;  
HQ563542;Lepidoptera;Erebia tyndarus;NA;NA;NA;0.999999999999923;  
HQ563543;Lepidoptera;Pyrgus alveus;NA;0.003;NA;0.999999999997732;  
HQ563544;Lepidoptera;Pyrgus alveus;NA;NA;Pyrgus alveus;0.902591602214502;  
HQ563545;Lepidoptera;Pyrgus alveus;NA;NA;Pyrgus alveus;0.827119616974978;  
HQ563546;Lepidoptera;Aricia agestis;NA;0.253;Aricia agestis;0.996350017387504;  
HQ563550;Lepidoptera;Polyommatus amandus;NA;0.249;Polyommatus amandus;0.997279404062746;  
HQ563551;Lepidoptera;Aricia artaxerxes;Plebejus argus;1;Aricia artaxerxes;0.999743187199922;  
HQ563552;Lepidoptera;Cyaniris semiargus;NA;NA;Cyaniris semiargus;0.997097672202902;  
HQ563553;Lepidoptera;Lysandra coridon;NA;NA;NA;0.998070184737648;  
HQ563554;Lepidoptera;Lysandra coridon;NA;NA;NA;0.998070184737648;  
HQ563555;Lepidoptera;Polyommatus icarus;NA;0.002;Polyommatus icarus;0.997871588783533;  
HQ563556;Lepidoptera;Cyaniris semiargus;NA;NA;Cyaniris semiargus;0.999051841766953;  
HQ563557;Lepidoptera;Pyrgus alveus;NA;0.003;NA;0.999999999997732;  
HQ563558;Lepidoptera;Pyrgus alveus;NA;0.003;NA;0.999999999997732;  
HQ563559;Lepidoptera;Pyrgus alveus;NA;NA;Pyrgus alveus;0.827119616974978;  
HQ563560;Lepidoptera;Thymelicus acteon;Thymelicus acteon;1;Thymelicus acteon;0.99999999752248;  
HQ563561;Lepidoptera;Pyrgus warrenensis;NA;0.003;NA;0.999999999997732;  
HQ563563;Lepidoptera;Thymelicus lineola;Thymelicus lineola;1;Thymelicus  
lineola;0.999995927238524;  
HQ563564;Lepidoptera;Carterocephalus palaemon;NA;0.052;Carterocephalus  
palaemon;0.728445051795325;  
HQ563565;Lepidoptera;Pyrgus malvae;Pyrgus malvae;NA;Pyrgus malvae;0.980121140374433;  
HQ563566;Lepidoptera;Pyrgus carthami;Pyrgus carthami;1;Pyrgus carthami;0.999997085657879;  
HQ563569;Lepidoptera;Aricia artaxerxes;Plebejus argus;1;Aricia artaxerxes;0.999743187199922;  
HQ563570;Lepidoptera;Pyrgus alveus;NA;NA;Pyrgus alveus;0.962152887824497;  
HQ563571;Lepidoptera;Pyrgus alveus;NA;NA;Pyrgus alveus;0.827119616974978;  
HQ563572;Lepidoptera;Aricia artaxerxes;Plebejus argus;1;Aricia artaxerxes;0.999743187199922;  
HQ563574;Lepidoptera;Aricia artaxerxes;Plebejus argus;1;Aricia artaxerxes;0.999743187199922;  
HQ563576;Lepidoptera;Aricia artaxerxes;Plebejus argus;1;Aricia artaxerxes;0.999743187199922;  
HQ563577;Lepidoptera;Pyrgus alveus;NA;NA;Pyrgus alveus;0.902591602214502;  
HQ563578;Lepidoptera;Aricia agestis;NA;0.067;Aricia agestis;0.999509743227786;  
HQ563579;Lepidoptera;Pyrgus alveus;NA;NA;Pyrgus alveus;0.902591602214502;  
HQ563580;Lepidoptera;Pyrgus alveus;NA;NA;Pyrgus alveus;0.827119616974978;  
HQ563581;Lepidoptera;Aricia artaxerxes;Plebejus argus;0.004;Aricia artaxerxes;0.99904771879725;  
HQ563582;Lepidoptera;Pyrgus alveus;NA;NA;Pyrgus alveus;0.827119616974978;  
HQ563583;Lepidoptera;Pyrgus alveus;NA;NA;NA;0.99999999887642;  
HQ563584;Lepidoptera;Pyrgus alveus;NA;NA;Pyrgus alveus;0.902591602214502;  
HQ563585;Lepidoptera;Pyrgus alveus;NA;0.003;NA;0.999999999997732;  
HQ563608;Lepidoptera;Issoria lathonia;Issoria lathonia;1;Issoria lathonia;0.99999999989257;  
HQ565464;Lepidoptera;Colias palaeno;NA;0.001;NA;0.99999999982869;  
HQ565465;Lepidoptera;Apatura iris;Apatura iris;1;Apatura iris;0.999999999999972;  
HQ565466;Lepidoptera;Apatura ilia;NA;0.165;Apatura ilia;0.956796812031481;  
HQ565468;Lepidoptera;Argynnis aglaja;NA;0.001;NA;0.99999999999586;  
HQ565472;Lepidoptera;Melitaea britomartis;Melicta britomartis;NA;Melitaea  
britomartis;0.933869879268478;  
HQ565491;Lepidoptera;Euphydryas aurinia;NA;0.194;Euphydryas aurinia;0.985201226652523;  
HQ565493;Lepidoptera;Coenonympha arcania;NA;0.004;NA;0.999999999999983;  
HQ565495;Lepidoptera;Erebia tyndarus;NA;NA;NA;0.999999999999923;  
HQ565496;Lepidoptera;Oeneis glacialis;NA;NA;Oeneis glacialis;0.892833742436513;  
HQ570286;Lepidoptera;Boloria thore;Boloria thore;1;Boloria thore;0.99999998091482;  
HQ570288;Lepidoptera;Colias palaeno;NA;0.002;NA;0.99999999983681;  
HQ570386;Lepidoptera;Pyrgus andromedae;Pyrgus andromedae;1;Pyrgus andromedae;0.999945721009741;  
HQ570388;Lepidoptera;Erebia medusa;NA;0.009;Erebia medusa;0.986275612856827;  
HQ570389;Lepidoptera;Erebia medusa;NA;0.009;Erebia medusa;0.986275612856827;  
HQ955418;Lepidoptera;Satyrium spini;Satyrium spini;1;Satyrium spini;0.99999835426407;  
HQ957206;Lepidoptera;Anthocharis cardamines;Anthocharis cardamines;1;Anthocharis  
cardamines;0.999999904052946;  
HQ957207;Lepidoptera;Anthocharis cardamines;Anthocharis cardamines;1;Anthocharis  
cardamines;0.99999962791663;  
HQ957209;Lepidoptera;Gonepteryx rhamni;NA;0.474;Gonepteryx rhamni;0.982076396127858;

HQ957210;Lepidoptera;Polyommatus dorylas;Polyommatus dorylas;1;Polyommatus dorylas;0.998759837233869;  
HQ957212;Lepidoptera;Aricia artaxerxes;Plebejus argus;1;Aricia artaxerxes;0.999743187199922;  
HQ957213;Lepidoptera;Pyrgus cacaliae;Pyrgus cacaliae;0.003;Pyrgus cacaliae;0.998434964230306;  
HQ957216;Lepidoptera;Limenitis camilla;Limenitis camilla;0.999;Limenitis camilla;0.999953690065568;  
HQ957217;Lepidoptera;Limenitis camilla;Limenitis camilla;1;Limenitis camilla;0.999939679225788;  
HQ957267;Lepidoptera;Aricia agestis;NA;0.253;Aricia agestis;0.996350017387504;  
HQ957268;Lepidoptera;Aricia agestis;NA;0.253;Aricia agestis;0.996350017387504;  
HQ957269;Lepidoptera;Aricia agestis;NA;0.253;Aricia agestis;0.996350017387504;  
HQ957270;Lepidoptera;Aricia agestis;NA;0.415;Aricia agestis;0.995575163376746;  
HQ957502;Lepidoptera;Hamearis lucina;NA;NA;Hamearis lucina;0.99999999984141;  
HQ957503;Lepidoptera;Limenitis camilla;Limenitis camilla;1;Limenitis camilla;0.999962628579717;  
HQ968286;Lepidoptera;Agriades glandon;NA;0.002;Agriades glandon;0.987189585708506;  
HQ968287;Lepidoptera;Agriades glandon;NA;0.002;Agriades glandon;0.987189585708506;  
HQ968288;Lepidoptera;Agriades glandon;Agriades glandon;NA;Agriades glandon;0.989560338766428;  
HQ968289;Lepidoptera;Agriades optilete;Agriades optilete;1;Agriades optilete;0.999999864568;  
HQ968293;Lepidoptera;Boloria thore;Boloria thore;1;Boloria thore;0.99999998359726;  
HQ968296;Lepidoptera;Boloria titania;Boloria titania;0.001;Boloria titania;0.99983358374111;  
HQ968297;Lepidoptera;Boloria titania;Boloria titania;0.001;Boloria titania;0.99983358374111;  
HQ968298;Lepidoptera;Boloria titania;Boloria titania;0.001;Boloria titania;0.99983358374111;  
HQ968299;Lepidoptera;Erebia pandrose;Erebia pandrose;0.013;Erebia pandrose;0.974388092470716;  
HQ968300;Lepidoptera;Boloria pales;Boloria pales;1;Boloria pales;0.998071007441061;  
HQ968301;Lepidoptera;Boloria pales;Boloria pales;1;Boloria pales;0.997102300597465;  
HQ968302;Lepidoptera;Boloria pales;Boloria pales;1;Boloria pales;0.999550793226151;  
HQ968430;Lepidoptera;Melitaea varia;Melitaea varia;1;Melitaea varia;0.999997686496646;  
HQ968431;Lepidoptera;Melitaea varia;Melitaea varia;1;Melitaea varia;0.999996867427246;  
HQ968432;Lepidoptera;Coenonympha glycerion;NA;0.28;Coenonympha glycerion;0.999998036263913;  
HQ968433;Lepidoptera;Erebia epiphron;NA;NA;Erebia epiphron;0.997605378796729;  
HQ968454;Lepidoptera;Lycaena tityrus;Lycaena tityrus;1;Lycaena tityrus;0.999991689073969;  
HQ968455;Lepidoptera;Oeneis glacialis;Boloria titania;0.001;Boloria titania;0.99983358374111;  
HQ968460;Lepidoptera;Boloria titania;Boloria titania;0.001;Boloria titania;0.99983358374111;  
HQ968461;Lepidoptera;Euphydryas aurinia;NA;0.31;Euphydryas aurinia;0.993387708761386;  
HQ968462;Lepidoptera;Euphydryas aurinia;NA;0.298;Euphydryas aurinia;0.981888414352726;  
HQ968463;Lepidoptera;Callophrys rubi;NA;0.001;Callophrys rubi;0.99870518510598;  
HQ968464;Lepidoptera;Callophrys rubi;NA;0.001;Callophrys rubi;0.99870518510598;  
HQ968465;Lepidoptera;Coenonympha gardetta;NA;0.001;Coenonympha gardetta;0.731095812176462;  
HQ968466;Lepidoptera;Cupido minimus;NA;0.001;Cupido minimus;0.999828420231565;  
HQ968472;Lepidoptera;Aricia artaxerxes;Plebejus argus;1;Aricia artaxerxes;0.999671471677394;  
HQ968473;Lepidoptera;Pyrgus andromedae;Pyrgus andromedae;0.001;Pyrgus andromedae;0.998828669843251;  
HQ968474;Lepidoptera;Aricia eumedon;Eumedonia eumedon;0.003;Eumedonia eumedon;0.997682558007858;  
HQ968475;Lepidoptera;Aricia eumedon;Eumedonia eumedon;0.006;Eumedonia eumedon;0.997094629310374;  
HQ968476;Lepidoptera;Lycaena tityrus;Lycaena tityrus;1;Lycaena tityrus;0.999998928238034;  
HQ968477;Lepidoptera;Erebia epiphron;Erebia epiphron;NA;Erebia epiphron;0.998837748029833;  
HQ968478;Lepidoptera;Erebia medusa;NA;0.037;Erebia medusa;0.967935760207416;  
HQ968479;Lepidoptera;Erebia meolans;Erebia meolans;NA;Erebia meolans;0.999888168778318;  
HQ968480;Lepidoptera;Erebia meolans;Erebia meolans;0.999;Erebia meolans;0.999893587788713;  
HQ968481;Lepidoptera;Erebia meolans;Erebia meolans;NA;Erebia meolans;0.999888168778318;  
HQ968482;Lepidoptera;Erebia epiphron;Erebia epiphron;NA;Erebia epiphron;0.998837748029833;  
HQ968483;Lepidoptera;Erebia epiphron;Erebia epiphron;NA;Erebia epiphron;0.998837748029833;  
HQ968484;Lepidoptera;Erebia melampus;Erebia melampus;0.011;Erebia melampus;0.975499903768874;  
HQ968485;Lepidoptera;Coenonympha gardetta;NA;0.12;NA;0.999999999999993;  
HQ968486;Lepidoptera;Aricia artaxerxes;Plebejus argus;1;Aricia artaxerxes;0.999707730914532;  
HQ968489;Lepidoptera;Araschnia levana;Araschnia levana;1;Araschnia levana;0.99999772187832;  
HQ968506;Lepidoptera;Euphydryas aurinia;NA;0.31;Euphydryas aurinia;0.993387708761386;  
HQ968508;Lepidoptera;Erebia manto;NA;0.179;Erebia manto;0.9978825939314;  
HQ968509;Lepidoptera;Erebia manto;NA;0.192;Erebia manto;0.997710988231194;  
HQ968510;Lepidoptera;Erebia pronoe;Erebia pronoe;NA;Erebia pronoe;0.906909765449499;  
HQ968511;Lepidoptera;Erebia medusa;NA;0.037;Erebia medusa;0.967935760207416;  
HQ968512;Lepidoptera;Erebia epiphron;Erebia epiphron;NA;Erebia epiphron;0.998837748029833;  
HQ968516;Lepidoptera;Melitaea cinxia;Melitaea cinxia;1;Melitaea cinxia;0.9999999999999801;  
HQ968517;Lepidoptera;Aricia eumedon;Eumedonia eumedon;0.002;Eumedonia eumedon;0.997434540282035;  
HQ968520;Lepidoptera;Lycaena tityrus;Lycaena tityrus;1;Lycaena tityrus;0.999997027007808;  
HQ968522;Lepidoptera;Erebia epiphron;NA;NA;Erebia epiphron;0.994401488812176;  
HQ968523;Lepidoptera;Euphydryas aurinia;NA;0.31;Euphydryas aurinia;0.993387708761386;  
HQ968524;Lepidoptera;Aricia artaxerxes;NA;0.394;Aricia artaxerxes;0.999502890976379;  
HQ968525;Lepidoptera;Carterocephalus palaemon;Carterocephalus palaemon;0.01;Carterocephalus palaemon;0.817246099879953;  
HQ968526;Lepidoptera;Erebia euryale;NA;NA;Erebia euryale;0.907478661508288;  
HQ968527;Lepidoptera;Colias phicomone;NA;0.001;Colias phicomone;0.985598879697681;  
HQ968528;Lepidoptera;Erebia pandrose;Erebia pandrose;0.013;Erebia pandrose;0.974388092470716;  
HQ968529;Lepidoptera;Euphydryas aurinia;NA;0.31;Euphydryas aurinia;0.993387708761386;  
HQ968530;Lepidoptera;Coenonympha gardetta;NA;0.001;NA;0.999999999999997;  
HQ968531;Lepidoptera;Erebia tyndarus;NA;NA;0.999999999999923;  
HQ968532;Lepidoptera;Melitaea varia;Melitaea varia;1;Melitaea varia;0.999992527121135;  
HQ968533;Lepidoptera;Erebia mnestra;Erebia mnestra;0.002;Erebia mnestra;0.999848876047927;  
HQ968534;Lepidoptera;Erebia mnestra;Erebia mnestra;0.002;Erebia mnestra;0.999845899963913;

HQ968535;Lepidoptera;Melitaea varia;Melitaea varia;1;Melitaea varia;0.999992527121135;  
HQ996661;Lepidoptera;Pyrgus sidae;Pyrgus sidae;1;Pyrgus sidae;0.999993672336597;  
HQ996662;Lepidoptera;Pyrgus sidae;Pyrgus sidae;1;Pyrgus sidae;0.999993672336597;  
HQ996664;Lepidoptera;Pyrgus sidae;Pyrgus sidae;1;Pyrgus sidae;0.999968332724737;  
ISSWG153-21;Lepidoptera;Thymelicus lineola;Thymelicus lineola;1;Thymelicus  
lineola;0.999991813825713;  
ISSWG245-21;Lepidoptera;Thymelicus lineola;Thymelicus lineola;1;Thymelicus  
lineola;0.999975085149331;  
JF262055;Lepidoptera;Glaucopsyche melanops;Glaucopsyche melanops;1;NA;0.700009170980357;  
JF283325;Lepidoptera;Pyrgus carthami;Pyrgus carthami;1;Pyrgus carthami;0.999997085657879;  
JF283344;Lepidoptera;Pyrgus sidae;Pyrgus sidae;1;Pyrgus sidae;0.99999495957445;  
JF283347;Lepidoptera;Pyrgus sidae;Pyrgus sidae;1;Pyrgus sidae;0.999959757681902;  
JF283350;Lepidoptera;Pyrgus sidae;Pyrgus sidae;1;Pyrgus sidae;0.999994277634217;  
JF283351;Lepidoptera;Pyrgus sidae;Pyrgus sidae;1;Pyrgus sidae;0.99996750457282;  
JF283352;Lepidoptera;Pyrgus sidae;Pyrgus sidae;1;Pyrgus sidae;0.999994277634217;  
JF283353;Lepidoptera;Pyrgus sidae;Pyrgus sidae;1;Pyrgus sidae;0.999994277634217;  
JF283354;Lepidoptera;Pyrgus sidae;Pyrgus sidae;1;Pyrgus sidae;0.999994277634217;  
JF283355;Lepidoptera;Pyrgus sidae;Pyrgus sidae;1;Pyrgus sidae;0.999994277634217;  
JF283356;Lepidoptera;Pyrgus sidae;Pyrgus sidae;1;Pyrgus sidae;0.999984781588847;  
JF283357;Lepidoptera;Pyrgus sidae;Pyrgus sidae;1;Pyrgus sidae;0.999994277634217;  
JF283371;Lepidoptera;Pyrgus sidae;Pyrgus sidae;1;Pyrgus sidae;0.99999311394709;  
JF283372;Lepidoptera;Pyrgus sidae;Pyrgus sidae;1;Pyrgus sidae;0.99999311394709;  
JF283376;Lepidoptera;Pyrgus sidae;Pyrgus sidae;1;Pyrgus sidae;0.999991149939742;  
JF283382;Lepidoptera;Pyrgus sidae;Pyrgus sidae;1;Pyrgus sidae;0.999996542615443;  
JF283389;Lepidoptera;Pyrgus sidae;Pyrgus sidae;1;Pyrgus sidae;0.999994277634217;  
JF283390;Lepidoptera;Pyrgus sidae;Pyrgus sidae;1;Pyrgus sidae;0.999994277634217;  
JF283391;Lepidoptera;Pyrgus sidae;Pyrgus sidae;1;Pyrgus sidae;0.999994277634217;  
JF283392;Lepidoptera;Pyrgus sidae;Pyrgus sidae;1;Pyrgus sidae;0.999994277634217;  
JF283393;Lepidoptera;Pyrgus sidae;Pyrgus sidae;1;Pyrgus sidae;0.999994277634217;  
JF415668;Lepidoptera;Aporia crataegi;NA;NA;Aporia crataegi;0.999998459680561;  
JF415669;Lepidoptera;Fabriciana adippe;Fabriciana adippe;1;Fabriciana adippe;0.995947626017421;  
JF415670;Lepidoptera;Fabriciana adippe;Fabriciana adippe;1;Fabriciana adippe;0.995429620697469;  
JF415671;Lepidoptera;Aricia agestis;NA;0.253;Aricia agestis;0.996350017387504;  
JF415672;Lepidoptera;Aricia agestis;NA;0.253;Aricia agestis;0.996350017387504;  
JF415673;Lepidoptera;Aricia agestis;NA;0.253;Aricia agestis;0.996350017387504;  
JF415674;Lepidoptera;Aricia agestis;NA;0.253;Aricia agestis;0.996350017387504;  
JF415675;Lepidoptera;Aricia agestis;NA;0.253;Aricia agestis;0.996350017387504;  
JF415676;Lepidoptera;Aricia agestis;NA;0.253;Aricia agestis;0.996350017387504;  
JF415677;Lepidoptera;Aricia artaxerxes;Plebejus argus;1;Aricia artaxerxes;0.999743187199922;  
JF415678;Lepidoptera;Aricia eumedon;Eumedonia eumedon;0.017;Aricia eumedon;0.990022718798503;  
JF415680;Lepidoptera;Boloria dia;Boloria dia;1;Boloria dia;0.9999999997425;  
JF415683;Lepidoptera;Boloria euphrosyne;Boloria euphrosyne;1;Boloria  
euphrosyne;0.999998552914401;  
JF415684;Lepidoptera;Boloria euphrosyne;Boloria euphrosyne;1;Boloria  
euphrosyne;0.999997047227918;  
JF415689;Lepidoptera;Boloria titania;Boloria titania;0.001;Boloria titania;0.99983358374111;  
JF415690;Lepidoptera;Brenthis ino;Brenthis ino;0.007;Brenthis ino;0.977157381961834;  
JF415691;Lepidoptera;Celastrina argiolus;Celastrina argiolus;1;Celastrina  
argiolus;0.999708846309046;  
JF415694;Lepidoptera;Colias alfacariensis;Colias alfacariensis;0.004;Colias  
alfacariensis;0.99974939016745;  
JF415696;Lepidoptera;Erebia euryale;NA;NA;Erebia euryale;0.907156911257842;  
JF415697;Lepidoptera;Erebia euryale;NA;NA;Erebia euryale;0.919518760623792;  
JF415700;Lepidoptera;Erebia medusa;NA;0.009;Erebia medusa;0.986275612856827;  
JF415701;Lepidoptera;Erebia medusa;NA;0.009;Erebia medusa;0.986275612856827;  
JF415702;Lepidoptera;Erebia oeme;NA;0.114;Erebia oeme;0.99999999830635;  
JF415703;Lepidoptera;Erebia oeme;NA;0.161;Erebia oeme;0.99999999457856;  
JF415704;Lepidoptera;Erebia pronoe;Erebia pronoe;1;Erebia pronoe;0.999567958198288;  
JF415705;Lepidoptera;Erebia pronoe;Erebia pronoe;1;Erebia pronoe;0.999567958198288;  
JF415706;Lepidoptera;Euphydryas aurinia;NA;0.001;Euphydryas aurinia;0.995576749826865;  
JF415709;Lepidoptera;Lasiommata maera;Lasiommata maera;1;Lasiommata maera;0.99999510792253;  
JF415711;Lepidoptera;Lycaena tityrus;Lycaena tityrus;1;Lycaena tityrus;0.999998928238034;  
JF415713;Lepidoptera;Melitaea cinxia;Melitaea cinxia;1;Melitaea cinxia;0.99999999999488;  
JF415714;Lepidoptera;Melitaea cinxia;Melitaea cinxia;1;Melitaea cinxia;0.999999999999375;  
JF415715;Lepidoptera;Melitaea diamina;NA;0.305;Melitaea diamina;0.999999994065661;  
JF415716;Lepidoptera;Melitaea diamina;NA;0.305;Melitaea diamina;0.999999994065661;  
JF415717;Lepidoptera;Melitaea didyma;Melitaea didyma;0.021;Melitaea didyma;0.9742722334097;  
JF415719;Lepidoptera;Ochlodes sylvanus;NA;0.316;Ochlodes sylvanus;0.996318754838625;  
JF415721;Lepidoptera;Parnassius apollo;Parnassius apollo;1;Parnassius apollo;0.992704703916692;  
JF415724;Lepidoptera;Plebejus idas;NA;0.007;NA;0.999546324331549;  
JF415725;Lepidoptera;Lysandra coridon;NA;NA;NA;0.992959117456688;  
JF415726;Lepidoptera;Polyommatus damon;Polyommatus damon;1;Polyommatus damon;0.999999381161721;  
JF415727;Lepidoptera;Polyommatus icarus;NA;NA;Polyommatus icarus;0.847406848705006;  
JF415728;Lepidoptera;Pyrgus malvae;Pyrgus malvae;NA;Pyrgus malvae;0.980121140374433;  
JF415729;Lepidoptera;Pyrgus malvae;Pyrgus malvae;NA;Pyrgus malvae;0.980121140374433;  
JF415730;Lepidoptera;Pyrgus malvae;Pyrgus malvae;NA;Pyrgus malvae;0.980121140374433;  
JF415731;Lepidoptera;Thymelicus sylvestris;NA;0.324;Thymelicus sylvestris;0.999940778442454;  
JF810413;Lepidoptera;Callophrys rubi;NA;0.002;NA;0.999729984229093;

JF847976;Lepidoptera;Apatura ilia;NA;NA;Apatura ilia;0.935728859550908;  
JF847980;Lepidoptera;Apatura iris;Apatura iris;1;Apatura iris;0.99999999999972;  
JF847985;Lepidoptera;Erebia epiphron;NA;NA;Erebia epiphron;0.930026054867432;  
JF847986;Lepidoptera;Hamearis lucina;NA;NA;Hamearis lucina;0.99999999984141;  
JF847989;Lepidoptera;Pyrgus serratulae;Pyrgus serratulae;1;Pyrgus serratulae;0.9999989567508;  
JF847990;Lepidoptera;Pyrgus serratulae;Pyrgus serratulae;1;Pyrgus serratulae;0.9999989567508;  
JF847991;Lepidoptera;Pyrgus serratulae;Pyrgus serratulae;1;Pyrgus serratulae;0.99999908955122;  
JF847992;Lepidoptera;Pyrgus serratulae;Pyrgus serratulae;1;Pyrgus serratulae;0.9999989567508;  
JF847993;Lepidoptera;Pyrgus serratulae;Pyrgus serratulae;1;Pyrgus serratulae;0.9999989567508;  
JF847994;Lepidoptera;Euphydryas aurinia;NA;0.432;Euphydryas aurinia;0.986888557954672;  
JF847995;Lepidoptera;Helleia helle;Lycaena helle;1;Lycaena helle;0.99999994999371;  
JF847996;Lepidoptera;Helleia helle;Lycaena helle;1;Lycaena helle;0.99999994999371;  
JF847997;Lepidoptera;Helleia helle;Lycaena helle;1;Lycaena helle;0.99999994999371;  
JF847998;Lepidoptera;Helleia helle;Lycaena helle;1;Lycaena helle;0.99999994999371;  
JF847999;Lepidoptera;Helleia helle;Lycaena helle;1;Lycaena helle;0.99999996162757;  
JF848000;Lepidoptera;Cupido osiris;Cupido osiris;1;Cupido osiris;0.99999944757265;  
JF848001;Lepidoptera;Euphydryas aurinia;Euphydryas aurinia;0.012;Euphydryas aurinia;0.997780875235948;  
JF848004;Lepidoptera;Aricia eumedon;Eumedonia eumedon;0.003;Eumedonia eumedon;0.998278637613531;  
JF848005;Lepidoptera;Boloria selene;NA;NA;Boloria selene;0.999999920739274;  
JF848006;Lepidoptera;Apatura iris;Apatura iris;1;Apatura iris;0.99999999999972;  
JF848007;Lepidoptera;Pyrgus carthami;Pyrgus carthami;1;Pyrgus carthami;0.999998802660492;  
JF848008;Lepidoptera;Cupido osiris;Cupido osiris;1;Cupido osiris;0.999997440696525;  
JF850424;Lepidoptera;Parnassius apollo;Parnassius apollo;1;Parnassius apollo;0.992704703916692;  
JF850425;Lepidoptera;Parnassius mnemosyne;Parnassius mnemosyne;1;Parnassius mnemosyne;0.999999326633058;  
JF850427;Lepidoptera;Lycaena tityrus;Lycaena tityrus;1;Lycaena tityrus;0.999997027007808;  
JF850428;Lepidoptera;Cupido minimus;NA;0.006;Cupido minimus;0.999768371759258;  
JF850429;Lepidoptera;Cupido argiades;NA;0.499;NA;0.99999999984682;  
JF850430;Lepidoptera;Cupido argiades;NA;0.189;Cupido argiades;0.713277686893393;  
JF850431;Lepidoptera;Lycaena tityrus;Lycaena tityrus;1;Lycaena tityrus;0.999995729087172;  
JF850432;Lepidoptera;Cupido argiades;NA;0.499;NA;0.99999999984682;  
JF853516;Lepidoptera;Fabriciana niobe;NA;0.001;Fabriciana niobe;0.948797566470808;  
JF853517;Lepidoptera;Fabriciana niobe;NA;0.001;Fabriciana niobe;0.948797566470808;  
JF853545;Lepidoptera;Lycaena dispar;Lycaena dispar;1;Lycaena dispar;0.99999990743959;  
JF853606;Lepidoptera;Carterocephalus palaemon;NA;0.052;Carterocephalus palaemon;0.728445051795325;  
JF853607;Lepidoptera;Carterocephalus palaemon;Carterocephalus palaemon;0.016;Carterocephalus palaemon;0.930544560040029;  
JF853612;Lepidoptera;Ochlodes sylvanus;NA;0.316;Ochlodes sylvanus;0.996318754838625;  
JF853616;Lepidoptera;Anthocharis cardamines;Anthocharis cardamines;1;Anthocharis cardamines;0.999999843941806;  
JF853617;Lepidoptera;Satyrium pruni;NA;0.076;Satyrium pruni;0.990322364021655;  
JF853618;Lepidoptera;Callophrys rubi;NA;0.003;Callophrys rubi;0.997328639918919;  
JF853619;Lepidoptera;Lycaena phlaeas;Lycaena phlaeas;1;Lycaena phlaeas;0.99999996363186;  
JF853620;Lepidoptera;Lycaena virgaureae;NA;0.067;Lycaena virgaureae;0.999579233710412;  
JF853622;Lepidoptera;Lycaena hippothoe;NA;NA;Lycaena hippothoe;0.929268253497542;  
JF853623;Lepidoptera;Gonepteryx rhamni;NA;0.183;Gonepteryx rhamni;0.985836621117961;  
JF853624;Lepidoptera;Pieris napi;NA;NA;NA;100.000.000.000.001;  
JF853628;Lepidoptera;Aporia crataegi;NA;NA;Aporia crataegi;0.999997266436607;  
JF853629;Lepidoptera;Aporia crataegi;NA;NA;Aporia crataegi;0.999997266436607;  
JF853631;Lepidoptera;Colias hyale;Colias hyale;0.015;Colias hyale;0.999997884296128;  
JF853632;Lepidoptera;Colias palaeno;NA;0.002;NA;0.99999999983681;  
JF853633;Lepidoptera;Celastrina argiolus;Celastrina argiolus;1;Celastrina argiolus;0.999708846309046;  
JF853634;Lepidoptera;Celastrina argiolus;Celastrina argiolus;1;Celastrina argiolus;0.999708846309046;  
JF853635;Lepidoptera;Glaucopsyche alexis;NA;NA;Glaucopsyche alexis;0.979381169624069;  
JF853636;Lepidoptera;Aricia artaxerxes;Plebejus argus;1;Aricia artaxerxes;0.999743187199922;  
JF853637;Lepidoptera;Aricia eumedon;Eumedonia eumedon;0.001;Eumedonia eumedon;0.997942473254099;  
JF853638;Lepidoptera;Plebejus argus;NA;0.328;Plebejus argus;0.969789734199889;  
JF853639;Lepidoptera;Agriades optilete;Agriades optilete;1;Agriades optilete;0.999999991149878;  
JF853641;Lepidoptera;Polyommatus icarus;NA;0.001;Polyommatus icarus;0.971665478142064;  
JF853641;Lepidoptera;Polyommatus icarus;NA;0.001;Polyommatus icarus;0.971665478142064;  
JF853642;Lepidoptera;Polyommatus amandus;Polyommatus amandus;0.003;Polyommatus amandus;0.999983287111715;  
JF853643;Lepidoptera;Thecla betulae;Thecla betulae;1;Thecla betulae;0.99999999961119;  
JF853644;Lepidoptera;Vanessa cardui;Vanessa cardui;1;Vanessa cardui;0.999999459983318;  
JF853645;Lepidoptera;Vanessa atalanta;Vanessa atalanta;1;Vanessa atalanta;0.9999999957015;  
JF853648;Lepidoptera;Aglais urticae;Aglais urticae;0.001;Aglais urticae;0.990690600684087;  
JF853652;Lepidoptera;Apatura ilia;Apatura ilia;NA;Apatura ilia;0.988792300608896;  
JF853653;Lepidoptera;Nymphalis c-album;Polygonia c-album;0.015;NA;0.99999926882126;  
JF853654;Lepidoptera;Argynnis aglaja;NA;NA;NA;0.99999999998051;  
JF853655;Lepidoptera;Fabriciana adippe;Fabriciana adippe;0.028;Fabriciana adippe;0.969769198942097;  
JF853656;Lepidoptera;Fabriciana adippe;Fabriciana adippe;0.001;Fabriciana adippe;0.985680812514845;  
JF853657;Lepidoptera;Fabriciana niobe;NA;0.001;Fabriciana niobe;0.948797566470808;

JF853658;Lepidoptera;Issoria lathonia;Issoria lathonia;1;Issoria lathonia;0.999999999989257;  
JF853659;Lepidoptera;Brenthis ino;Brenthis ino;0.001;Brenthis ino;0.994711912827522;  
JF853661;Lepidoptera;Boloria selene;NA;0.281;Boloria selene;0.999999606392712;  
JF853663;Lepidoptera;Boloria euphrosyne;Boloria euphrosyne;1;Boloria euphrosyne;0.999998552914401;  
JF853665;Lepidoptera;Euphydryas maturna;NA;NA;NA;0.999999999996973;  
JF853666;Lepidoptera;Hipparchia semele;NA;0.002;Hipparchia semele;0.807780383202924;  
JF853667;Lepidoptera;Hipparchia semele;NA;0.002;Hipparchia semele;0.784603069619426;  
JF853668;Lepidoptera;Erebia medusa;NA;0.009;Erebia medusa;0.986275612856827;  
JF853673;Lepidoptera;Coenonympha pamphilus;Coenonympha pamphilus;1;Coenonympha pamphilus;0.999999999999744;  
JF853674;Lepidoptera;Aphantopus hyperantus;Aphantopus hyperantus;0.004;Aphantopus hyperantus;0.999598909345147;  
JF853675;Lepidoptera;Pararge aegeria;Pararge aegeria;1;Pararge aegeria;0.999999999963165;  
JF853676;Lepidoptera;Pararge aegeria;Pararge aegeria;1;Pararge aegeria;0.999999999963165;  
JF853677;Lepidoptera;Lasiommata maera;Lasiommata maera;1;Lasiommata maera;0.999993981691807;  
JF853678;Lepidoptera;Lasiommata maera;Lasiommata maera;1;Lasiommata maera;0.999999181072746;  
JF853798;Lepidoptera;Thymelicus lineola;Thymelicus lineola;1;Thymelicus lineola;0.999932511874613;  
JF853803;Lepidoptera;Apatura iris;Apatura iris;1;Apatura iris;0.999999999999972;  
JF853804;Lepidoptera;Apatura ilia;Apatura ilia;NA;Apatura ilia;0.988792300608896;  
JF853830;Lepidoptera;Satyrium pruni;NA;0.076;Satyrium pruni;0.990322364021655;  
JF853831;Lepidoptera;Glaucopsyche alexis;NA;NA;Glaucopsyche alexis;0.979381169624069;  
JF853832;Lepidoptera;Euphydryas maturna;NA;NA;NA;0.999999999996973;  
JF854415;Lepidoptera;Lycaena dispar;Lycaena dispar;1;Lycaena dispar;0.999999990743959;  
JF854416;Lepidoptera;Lycaena dispar;Lycaena dispar;1;Lycaena dispar;0.999999990743959;  
JF854417;Lepidoptera;Scolitantides orion;Scolitantides orion;NA;Scolitantides orion;0.999999987418505;  
JF854419;Lepidoptera;Erebia euryale;NA;NA;Erebia euryale;0.911037472312872;  
JF854420;Lepidoptera;Erebia euryale;NA;NA;Erebia euryale;0.919518760623792;  
JF854491;Lepidoptera;Lasiommata megera;Lasiommata megera;0.006;Lasiommata megera;0.992588117195958;  
JF854492;Lepidoptera;Lasiommata megera;Lasiommata megera;1;Lasiommata megera;0.999928528239676;  
JF854493;Lepidoptera;Colias croceus;NA;0.059;NA;0.99999999999738;  
JF854496;Lepidoptera;Iphiclide podalirius;NA;0.313;Iphiclide podalirius;0.889198863100098;  
JF854581;Lepidoptera;Euphydryas maturna;NA;0.126;Euphydryas maturna;0.885705216462044;  
JF859941;Lepidoptera;Pararge aegeria;Pararge aegeria;1;Pararge aegeria;0.999999996428699;  
JF859942;Lepidoptera;Erebia medusa;NA;0.01;Erebia medusa;0.979621232162315;  
JF859943;Lepidoptera;Coenonympha pamphilus;Coenonympha pamphilus;1;Coenonympha pamphilus;0.999999999999744;  
JF859976;Lepidoptera;Carterocephalus palaemon;NA;0.052;Carterocephalus palaemon;0.728445051795325;  
JF860019;Lepidoptera;Argynnis aglaja;NA;NA;Speyeria aglaja;0.872991147917853;  
JF860243;Lepidoptera;Boloria titania;Boloria titania;0.001;Boloria titania;0.99983358374111;  
JF860261;Lepidoptera;Pyrgus andromedae;Pyrgus andromedae;0.001;Pyrgus andromedae;0.998828669843251;  
JF860268;Lepidoptera;Agriades orbitulus;NA;0.01;Agriades orbitulus;0.998991302227708;  
JN084662;Lepidoptera;Polyommatus celina;Polyommatus celina;0.001;Polyommatus celina;0.999999998406594;  
JN084663;Lepidoptera;Polyommatus celina;Polyommatus celina;0.002;Polyommatus celina;0.999999998632774;  
JN084664;Lepidoptera;Polyommatus celina;Polyommatus celina;0.001;Polyommatus celina;0.999999998295038;  
JN084665;Lepidoptera;Polyommatus celina;Polyommatus celina;0.002;Polyommatus celina;0.999999998098872;  
JN084668;Lepidoptera;Polyommatus celina;Polyommatus celina;0.011;Polyommatus celina;0.99999999815316;  
JN084670;Lepidoptera;Polyommatus celina;Polyommatus celina;0.009;Polyommatus celina;0.99999999846835;  
JN084672;Lepidoptera;Polyommatus celina;NA;0.066;Polyommatus celina;0.999999999820375;  
JN084673;Lepidoptera;Polyommatus celina;NA;0.026;Polyommatus celina;0.99999999742386;  
JN084675;Lepidoptera;Polyommatus celina;Polyommatus celina;0.003;Polyommatus celina;0.999999999495316;  
JN084676;Lepidoptera;Polyommatus celina;NA;0.031;Polyommatus celina;0.999999999162497;  
JN084678;Lepidoptera;Polyommatus celina;Polyommatus celina;0.009;Polyommatus celina;0.99999999744972;  
JN084681;Lepidoptera;Polyommatus celina;Polyommatus celina;0.007;Polyommatus celina;0.999999999839019;  
JN084682;Lepidoptera;Polyommatus eros;NA;0.002;Polyommatus eros;0.844998768384732;  
JN084683;Lepidoptera;Polyommatus eros;NA;0.002;Polyommatus eros;0.834423002542038;  
JN084684;Lepidoptera;Polyommatus eros;NA;0.003;Polyommatus eros;0.920592712495623;  
JN084685;Lepidoptera;Polyommatus eros;NA;0.001;Polyommatus eros;0.952926802692268;  
JN084688;Lepidoptera;Polyommatus icarus;NA;0.032;NA;0.999986483378367;  
JN084690;Lepidoptera;Polyommatus eros;NA;0.005;Polyommatus eros;0.962873614249808;  
JN084691;Lepidoptera;Polyommatus icarus;Polyommatus icarus;1;Polyommatus icarus;0.929306371740776;  
JN084692;Lepidoptera;Polyommatus icarus;Polyommatus icarus;1;Polyommatus icarus;0.973480145147418;



JN084693;Lepidoptera;Polyommatus icarus;NA;0.122;Polyommatus icarus;0.924129158400787;  
JN084694;Lepidoptera;Polyommatus icarus;NA;0.004;Polyommatus icarus;0.897338824938527;  
JN084695;Lepidoptera;Polyommatus icarus;NA;0.003;Polyommatus icarus;0.876367325848701;  
JN084696;Lepidoptera;Polyommatus icarus;NA;0.001;Polyommatus icarus;0.988079488562884;  
JN084697;Lepidoptera;Polyommatus icarus;NA;0.001;Polyommatus icarus;0.993273500584892;  
JN084698;Lepidoptera;Polyommatus icarus;NA;0.001;Polyommatus icarus;0.994084407316265;  
JN084699;Lepidoptera;Polyommatus icarus;NA;0.005;Polyommatus icarus;0.991751251654024;  
JN084700;Lepidoptera;Polyommatus icarus;Polyommatus icarus;0.001;Polyommatus  
icarus;0.999326557615001;  
JN084701;Lepidoptera;Polyommatus icarus;Polyommatus icarus;0.002;Polyommatus  
icarus;0.999346502768464;  
JN084702;Lepidoptera;Polyommatus icarus;Polyommatus icarus;0.005;Polyommatus  
icarus;0.999275111324919;  
JN084703;Lepidoptera;Polyommatus icarus;Polyommatus icarus;0.001;Polyommatus  
icarus;0.999526751169551;  
JN084704;Lepidoptera;Polyommatus icarus;Polyommatus icarus;0.007;Polyommatus  
icarus;0.999488788177924;  
JN084705;Lepidoptera;Polyommatus icarus;NA;0.003;Polyommatus icarus;0.996721942207079;  
JN084706;Lepidoptera;Polyommatus icarus;Polyommatus icarus;0.001;Polyommatus  
icarus;0.99737489720609;  
JN084707;Lepidoptera;Polyommatus icarus;NA;0.003;Polyommatus icarus;0.997760766612533;  
JN084708;Lepidoptera;Polyommatus icarus;NA;0.001;Polyommatus icarus;0.947786269007611;  
JN084709;Lepidoptera;Polyommatus icarus;Polyommatus icarus;1;Polyommatus  
icarus;0.942188845781506;  
JN114414;Lepidoptera;Polyommatus icarus;NA;0.004;Polyommatus icarus;0.999481683747521;  
JN114415;Lepidoptera;Polyommatus icarus;Polyommatus icarus;0.001;Polyommatus  
icarus;0.999851522482238;  
JN114416;Lepidoptera;Polyommatus icarus;NA;0.004;Polyommatus icarus;0.999481683747521;  
JN114417;Lepidoptera;Polyommatus icarus;NA;0.002;Polyommatus icarus;0.998502314961965;  
JN262235;Lepidoptera;Apatura iris;Apatura iris;1;Apatura iris;0.999999999999972;  
JN264880;Lepidoptera;Charaxes jasius;Charaxes jasius;NA;Charaxes jasius;0.990397821479112;  
JN265784;Lepidoptera;Gonepteryx cleopatra;Gonepteryx cleopatra;0.998;Gonepteryx  
cleopatra;0.999118636582266;  
JN265785;Lepidoptera;Gonepteryx cleopatra;Gonepteryx cleopatra;0.998;Gonepteryx  
cleopatra;0.999118636582266;  
JN265786;Lepidoptera;Colias crocea;NA;0.059;NA;0.999999999999738;  
JN272495;Lepidoptera;Fabriciana adippe;Fabriciana adippe;0.001;Fabriciana  
adippe;0.999538788643547;  
JN272496;Lepidoptera;Fabriciana adippe;Fabriciana adippe;0.001;Fabriciana  
adippe;0.999095724865568;  
JN272497;Lepidoptera;Boloria euphrosyne;Boloria euphrosyne;0.003;Boloria  
euphrosyne;0.999970094877776;  
JN272499;Lepidoptera;Fabriciana adippe;NA;0.001;Fabriciana adippe;0.924751459079782;  
JN272500;Lepidoptera;Brenthis hecate;NA;0.068;Brenthis hecate;0.999053551498733;  
JN272502;Lepidoptera;Fabriciana adippe;Fabriciana adippe;1;Fabriciana adippe;0.999684800144869;  
JN272503;Lepidoptera;Fabriciana adippe;Fabriciana adippe;0.001;Fabriciana  
adippe;0.999538788643547;  
JN272504;Lepidoptera;Fabriciana adippe;Fabriciana adippe;1;Fabriciana adippe;0.999722411724441;  
JN272505;Lepidoptera;Boloria thore;Boloria thore;1;Boloria thore;0.999999999251798;  
JN272506;Lepidoptera;Brenthis ino;Brenthis ino;1;Brenthis ino;0.995903086085865;  
JN272507;Lepidoptera;Boloria thore;Boloria thore;1;Boloria thore;0.99999998359726;  
JN272539;Lepidoptera;Boloria euphrosyne;Boloria euphrosyne;1;Boloria  
euphrosyne;0.99998552914401;  
JN273363;Lepidoptera;Thymelicus sylvestris;NA;0.324;Thymelicus sylvestris;0.999940778442454;  
JN273364;Lepidoptera;Thymelicus acteon;Thymelicus acteon;1;Thymelicus acteon;0.9999999752248;  
JN273482;Lepidoptera;Thymelicus lineola;Thymelicus lineola;1;Thymelicus  
lineola;0.999971535093703;  
JN273485;Lepidoptera;Thymelicus lineola;Thymelicus lineola;1;Thymelicus  
lineola;0.999971535093703;  
JN274546;Lepidoptera;Melitaea cinxia;Melitaea cinxia;1;Melitaea cinxia;0.999999999999602;  
JN274547;Lepidoptera;Aglais urticae;Aglais urticae;0.999;Aglais urticae;0.996396169943103;  
JN274549;Lepidoptera;Euphydryas aurinia;Euphydryas aurinia;0.005;Euphydryas  
aurinia;0.998570950148478;  
JN274551;Lepidoptera;Melitaea britomartis;Melicta britomartis;NA;Melitaea  
britomartis;0.933869879268478;  
JN274552;Lepidoptera;Melitaea cinxia;Melitaea cinxia;1;Melitaea cinxia;0.999999999999488;  
JN274553;Lepidoptera;Melitaea cinxia;Melitaea cinxia;1;Melitaea cinxia;0.999999999999488;  
JN274554;Lepidoptera;Euphydryas aurinia;NA;0.001;Euphydryas aurinia;0.995576749826865;  
JN274555;Lepidoptera;Euphydryas aurinia;NA;0.001;Euphydryas aurinia;0.995576749826865;  
JN274637;Lepidoptera;Melitaea diamina;NA;0.149;Melitaea diamina;0.99999996592464;  
JN274638;Lepidoptera;Melitaea diamina;NA;0.149;Melitaea diamina;0.99999996592464;  
JN275717;Lepidoptera;Parnassius mnemosyne;Parnassius mnemosyne;1;Parnassius  
mnemosyne;0.99999956844826;  
JN276236;Lepidoptera;Anthocharis euphenoides;NA;0.172;Anthocharis euphenoides;0.943741664916385;  
JN276237;Lepidoptera;Anthocharis cardamines;Anthocharis cardamines;1;Anthocharis  
cardamines;0.999999940675226;  
JN276244;Lepidoptera;Anthocharis euphenoides;NA;0.172;Anthocharis euphenoides;0.943741664916385;  
JN276246;Lepidoptera;Pieris napi;NA;NA;Pieris napi;0.880626338564953;

JN276880;Lepidoptera;Polyommatus escheri;Polyommatus escheri;1;Polyommatus escheri;0.999998281574049;  
JN276884;Lepidoptera;Plebejus argus;Plebejus argus;1;Plebejus argus;0.997339600942735;  
JN276886;Lepidoptera;Polyommatus escheri;Polyommatus escheri;1;Polyommatus escheri;0.999998281574049;  
JN276887;Lepidoptera;Glaucopsyche melanops;Glaucopsyche melanops;1;Glaucopsyche melanops;0.999952924254607;  
JN276888;Lepidoptera;Glaucopsyche melanops;Glaucopsyche melanops;1;Glaucopsyche melanops;0.999976648921708;  
JN276889;Lepidoptera;Plebejus argus;NA;NA;Plebejus argus;0.969283117748927;  
JN276890;Lepidoptera;Glaucopsyche melanops;Glaucopsyche melanops;1;Glaucopsyche melanops;0.999952924254607;  
JN276891;Lepidoptera;Plebejus argus;Plebejus argus;0.014;Plebejus argus;0.979849220658559;  
JN276892;Lepidoptera;Cupido osiris;Cupido osiris;1;Cupido osiris;0.9999988431427;  
JN276893;Lepidoptera;Cupido osiris;Cupido osiris;1;Cupido osiris;0.999974988645513;  
JN276895;Lepidoptera;Plebejus idas;NA;0.001;NA;0.999590911470354;  
JN276897;Lepidoptera;Plebejus idas;Plebejus idas;0.001;NA;0.999655983096466;  
JN276901;Lepidoptera;Plebejus argus;Plebejus argus;0.014;Plebejus argus;0.979849220658559;  
JN276902;Lepidoptera;Cupido argiades;NA;0.499;NA;0.99999999984682;  
JN276903;Lepidoptera;Aricia eumedon;NA;0.069;Eumedonia eumedon;0.937041919865327;  
JN276904;Lepidoptera;Plebejus idas;NA;0.001;NA;0.998603327696059;  
JN276907;Lepidoptera;Aricia eumedon;Eumedonia eumedon;1;Eumedonia eumedon;0.924507020284958;  
JN276908;Lepidoptera;Cupido argiades;NA;0.499;NA;0.99999999984682;  
JN276909;Lepidoptera;Polyommatus amandus;Polyommatus amandus;1;Polyommatus amandus;0.999993368166194;  
JN276910;Lepidoptera;Lysandra coridon;NA;NA;NA;0.998070184737648;  
JN276911;Lepidoptera;Plebejus idas;NA;0.007;NA;0.999546324331549;  
JN276912;Lepidoptera;Aricia artaxerxes;Plebejus argus;1;Aricia artaxerxes;0.999743187199922;  
JN276913;Lepidoptera;Polyommatus daphnis;Polyommatus daphnis;0.008;Polyommatus daphnis;0.99732138840566;  
JN276914;Lepidoptera;Lysandra coridon;NA;NA;NA;0.998070184737648;  
JN276915;Lepidoptera;Aricia agestis;NA;0.253;Aricia agestis;0.996350017387504;  
JN276916;Lepidoptera;Polyommatus damon;Polyommatus damon;1;Polyommatus damon;0.99999955377263;  
JN276922;Lepidoptera;Cupido minimus;NA;0.003;Cupido minimus;0.999871667634294;  
JN276923;Lepidoptera;Aricia artaxerxes;NA;0.001;Aricia artaxerxes;0.99979307258486;  
JN277556;Lepidoptera;Carcharodus baeticus;Carcharodus baeticus;1;Carcharodus baeticus;0.999983899664537;  
JN277557;Lepidoptera;Pyrgus malvoides;NA;0.076;Pyrgus malvoides;0.887854315566122;  
JN277558;Lepidoptera;Pyrgus malvoides;NA;0.03;Pyrgus malvoides;0.934050489634307;  
JN277562;Lepidoptera;Pyrgus cacaliae;Pyrgus cacaliae;0.001;Pyrgus cacaliae;0.997779968725098;  
JN277563;Lepidoptera;Pyrgus alveus;NA;0.003;NA;0.99999999997732;  
JN277564;Lepidoptera;Pyrgus alveus;NA;NA;Pyrgus alveus;0.827119616974978;  
JN277565;Lepidoptera;Pyrgus alveus;NA;NA;Pyrgus alveus;0.827119616974978;  
JN277570;Lepidoptera;Pyrgus armoricanus;Pyrgus armoricanus;1;Pyrgus armoricanus;0.999997353848817;  
JN277571;Lepidoptera;Pyrgus warrenensis;NA;0.003;NA;0.99999999997732;  
JN277572;Lepidoptera;Pyrgus alveus;NA;NA;Pyrgus alveus;0.941697735568124;  
JN277573;Lepidoptera;Pyrgus serratulae;Pyrgus serratulae;1;Pyrgus serratulae;0.9999989567508;  
JN277575;Lepidoptera;Pyrgus alveus;NA;NA;Pyrgus alveus;0.827119616974978;  
JN277577;Lepidoptera;Pyrgus serratulae;Pyrgus serratulae;1;Pyrgus serratulae;0.9999989567508;  
JN277580;Lepidoptera;Erynnis tages;Erynnis tages;1;Erynnis tages;0.999999281987018;  
JN277845;Lepidoptera;Pyrgus andromedae;Pyrgus andromedae;1;Pyrgus andromedae;0.99960427425013;  
JN277846;Lepidoptera;Pyrgus andromedae;Pyrgus andromedae;1;Pyrgus andromedae;0.999845626259229;  
JN277847;Lepidoptera;Pyrgus alveus;NA;NA;Pyrgus alveus;0.922887984165083;  
JN278861;Lepidoptera;Erebia meolans;Erebia meolans;NA;Erebia meolans;0.999835953426128;  
JN278862;Lepidoptera;Cercyonis lupina;Hyponephele lupina;1;Hyponephele lupina;0.999999953670284;  
JN278872;Lepidoptera;Coenonympha dorus;Coenonympha dorus;1;Coenonympha dorus;0.99999999703419;  
JN278874;Lepidoptera;Hipparchia fagi;Hipparchia fagi;NA;Hipparchia fagi;0.973330290902851;  
JN278875;Lepidoptera;Cercyonis lupina;Hyponephele lupina;1;Hyponephele lupina;0.9999998018663;  
JN278877;Lepidoptera;Cercyonis lupina;Hyponephele lupina;1;Hyponephele lupina;0.9999998018663;  
JN278879;Lepidoptera;Hipparchia hermione;Hipparchia hermione;1;Hipparchia hermione;0.99988238204256;  
JN278880;Lepidoptera;Hipparchia semele;NA;0.008;Hipparchia semele;0.74726780401631;  
JN278882;Lepidoptera;Satyrus ferula;Satyrus ferula;0.001;Satyrus ferula;0.994329228962786;  
JN278883;Lepidoptera;Hipparchia semele;NA;0.001;Hipparchia semele;0.862655722502182;  
JN278884;Lepidoptera;Satyrus ferula;Satyrus ferula;0.001;Satyrus ferula;0.997389091702265;  
JN278891;Lepidoptera;Hipparchia statilinus;Hipparchia statilinus;1;Hipparchia statilinus;0.99999999999946;  
JN278892;Lepidoptera;Arethusana arethusa;Arethusana arethusa;1;Arethusana arethusa;0.999999733827174;  
JN278893;Lepidoptera;Arethusana arethusa;Arethusana arethusa;1;Arethusana arethusa;0.999999733827174;  
JN278894;Lepidoptera;Coenonympha dorus;Coenonympha dorus;1;Coenonympha dorus;0.99999999915957;  
JN278895;Lepidoptera;Coenonympha dorus;Coenonympha dorus;1;Coenonympha dorus;0.99999999861814;  
JN278896;Lepidoptera;Lasiommata megera;Lasiommata megera;1;Lasiommata megera;0.999770424843767;  
JN278897;Lepidoptera;Minois dryas;NA;0.025;Minois dryas;0.850746026247397;  
JN278898;Lepidoptera;Minois dryas;NA;0.025;Minois dryas;0.850746026247397;  
JN278899;Lepidoptera;Lasiommata maera;Lasiommata maera;1;Lasiommata maera;0.99999942908402;

JN278901;Lepidoptera;Erebia pharte;Erebia pharte;1;Erebia pharte;0.99999999630495;  
JN278902;Lepidoptera;Erebia manto;NA;0.192;Erebia manto;0.997710988231194;  
JN278903;Lepidoptera;Erebia oeme;NA;0.114;Erebia oeme;0.99999999830635;  
JN278904;Lepidoptera;Erebia euryale;NA;NA;Erebia euryale;0.891793339631426;  
JN278905;Lepidoptera;Erebia pronoe;Erebia pronoe;1;Erebia pronoe;0.999567958198288;  
JN278906;Lepidoptera;Erebia styx;NA;NA;Erebia styx;0.964967594538516;  
JN278907;Lepidoptera;Erebia pronoe;Erebia pronoe;1;Erebia pronoe;0.999567958198288;  
JN278908;Lepidoptera;Erebia pronoe;Erebia pronoe;1;Erebia pronoe;0.999567958198288;  
JN278909;Lepidoptera;Minois dryas;NA;0.025;Minois dryas;0.850746026247397;  
JN278910;Lepidoptera;Brintesia circe;Brintesia circe;1;Brintesia circe;0.99999951254154;  
JN278927;Lepidoptera;Erebia euryale;NA;NA;Erebia euryale;0.896073040775925;  
JN280062;Lepidoptera;Limenitis camilla;NA;0.049;Limenitis camilla;0.999921324781941;  
JN280740;Lepidoptera;Favonius quercus;NA;NA;Favonius quercus;0.73046069582187;  
JN280794;Lepidoptera;Lycaena alciphron;Lycaena alciphron;1;Lycaena alciphron;0.999999802956713;  
JN280795;Lepidoptera;Lycaena dispar;Lycaena dispar;1;Lycaena dispar;0.999999990743959;  
JN280797;Lepidoptera;Lycaena dispar;Lycaena dispar;1;Lycaena dispar;0.999999990743959;  
JN283987;Lepidoptera;Hamearis lucina;NA;NA;Hamearis lucina;0.99999999984141;  
JN283988;Lepidoptera;Hamearis lucina;NA;NA;Hamearis lucina;0.99999999984141;  
JN286153;Lepidoptera;Satyrium w-album;NA;0.056;Satyrium w-album;0.989378230996316;  
JN581045;Lepidoptera;Plebejus argus;NA;0.001;Plebejus artaxerxes;0.783192910822683;  
JN581046;Lepidoptera;Plebejus argus;NA;0.329;Plebejus artaxerxes;0.861065871161998;  
JN581047;Lepidoptera;Plebejus argus;NA;0.119;Plebejus artaxerxes;0.777287514901365;  
JN581048;Lepidoptera;Plebejus argus;NA;0.329;Plebejus artaxerxes;0.87533599385847;  
JN581049;Lepidoptera;Plebejus argus;NA;0.002;Plebejus artaxerxes;0.867913751762474;  
JN581050;Lepidoptera;Plebejus argus;NA;0.329;Plebejus artaxerxes;0.863590204914929;  
JN581051;Lepidoptera;Plebejus argus;NA;0.001;Plebejus artaxerxes;0.771297277867841;  
JN581052;Lepidoptera;Plebejus argus;NA;0.329;Plebejus artaxerxes;0.898756221079625;  
JN581053;Lepidoptera;Plebejus argus;NA;0.329;Plebejus artaxerxes;0.902874876101085;  
JN581054;Lepidoptera;Plebejus argus;NA;0.329;Plebejus artaxerxes;0.887561036013298;  
JN581055;Lepidoptera;Plebejus argus;NA;0.001;Plebejus artaxerxes;0.782539669648728;  
JN581056;Lepidoptera;Plebejus argus;NA;0.329;Plebejus artaxerxes;0.878270880288244;  
JN581057;Lepidoptera;Plebejus argus;NA;0.001;Plebejus artaxerxes;0.7849926493968;  
JN581058;Lepidoptera;Plebejus argus;NA;0.001;Plebejus artaxerxes;0.791969059784226;  
JN581059;Lepidoptera;Plebejus argus;NA;0.001;Plebejus artaxerxes;0.769066857349353;  
JN581060;Lepidoptera;Plebejus argus;NA;0.123;Plebejus artaxerxes;0.860415772996577;  
JN820118;Lepidoptera;Polyommatus icarus;NA;0.002;Polyommatus icarus;0.977063739380834;  
JN827862;Lepidoptera;Aporia crataegi;NA;NA;Aporia crataegi;0.999997694051005;  
JN827863;Lepidoptera;Aporia crataegi;NA;NA;Aporia crataegi;0.999996781126733;  
JN827864;Lepidoptera;Aporia crataegi;NA;NA;Aporia crataegi;0.999996781126733;  
JN827865;Lepidoptera;Aporia crataegi;NA;NA;Aporia crataegi;0.999995283373874;  
JN827866;Lepidoptera;Aricia eumedon;Eumedonia eumedon;1;Eumedonia eumedon;0.998912717557217;  
JN827867;Lepidoptera;Aricia eumedon;Eumedonia eumedon;1;Eumedonia eumedon;0.997792722086228;  
JN827868;Lepidoptera;Aricia eumedon;Eumedonia eumedon;1;Eumedonia eumedon;0.998912717557217;  
JN827869;Lepidoptera;Aricia eumedon;Eumedonia eumedon;0.001;Eumedonia eumedon;0.997779785094791;  
JN827871;Lepidoptera;Boloria pales;Boloria pales;1;Boloria pales;0.999024569652783;  
JN827872;Lepidoptera;Boloria pales;Boloria pales;1;Boloria pales;0.998507647164222;  
JN827873;Lepidoptera;Celastrina argiolus;Celastrina argiolus;0.999;Celastrina argiolus;0.997763693175195;  
JN827874;Lepidoptera;Celastrina argiolus;Celastrina argiolus;0.999;Celastrina argiolus;0.999500479526489;  
JN827875;Lepidoptera;Celastrina argiolus;Celastrina argiolus;0.997;Celastrina argiolus;0.999539235304467;  
JN827876;Lepidoptera;Celastrina argiolus;Celastrina argiolus;0.999;Celastrina argiolus;0.999500479526489;  
JN827877;Lepidoptera;Celastrina argiolus;Celastrina argiolus;1;Celastrina argiolus;0.999485186737738;  
JN827878;Lepidoptera;Coenonympha pamphilus;Coenonympha pamphilus;1;Coenonympha pamphilus;0.99999999999744;  
JN827879;Lepidoptera;Colias crocea;NA;0.059;NA;0.99999999999738;  
JN827880;Lepidoptera;Erebia oeme;NA;0.114;Erebia oeme;0.99999999830635;  
JN827881;Lepidoptera;Erebia oeme;NA;0.114;Erebia oeme;0.99999999830635;  
JN827882;Lepidoptera;Erebia oeme;NA;0.114;Erebia oeme;0.99999999830635;  
JN827883;Lepidoptera;Erebia oeme;NA;0.114;Erebia oeme;0.99999999830635;  
JN827884;Lepidoptera;Erebia oeme;NA;0.114;Erebia oeme;0.99999999830635;  
JN827889;Lepidoptera;Vanessa atalanta;Vanessa atalanta;1;Vanessa atalanta;0.99999999757762;  
JN827890;Lepidoptera;Vanessa atalanta;Vanessa atalanta;1;Vanessa atalanta;0.99999999757762;  
JN827891;Lepidoptera;Vanessa atalanta;Vanessa atalanta;1;Vanessa atalanta;0.99999999383476;  
JN827892;Lepidoptera;Vanessa atalanta;Vanessa atalanta;1;Vanessa atalanta;0.99999999757762;  
JN827893;Lepidoptera;Vanessa atalanta;Vanessa atalanta;1;Vanessa atalanta;0.99999999017149;  
JX013970;Lepidoptera;Erebia medusa;NA;0.017;NA;0.99999999819795;  
JX013971;Lepidoptera;Erebia medusa;NA;0.017;NA;0.99999999819795;  
JX013972;Lepidoptera;Erebia medusa;NA;0.017;NA;0.99999999819795;  
JX013973;Lepidoptera;Erebia medusa;NA;0.017;NA;0.99999999819795;  
JX013974;Lepidoptera;Erebia medusa;NA;0.004;NA;0.999999998506986;  
JX034611;Lepidoptera;Erebia medusa;NA;0.009;Erebia medusa;0.986275612856827;  
JX034616;Lepidoptera;Erebia pandrose;Erebia pandrose;0.017;Erebia pandrose;0.979533383298681;  
JX034634;Lepidoptera;Erebia pandrose;Erebia pandrose;0.999;Erebia pandrose;0.99815402817964;  
JX034650;Lepidoptera;Erebia pandrose;Erebia pandrose;0.999;Erebia pandrose;0.99815402817964;

JX034685;Lepidoptera;Boloria thore;Boloria thore;1;Boloria thore;0.99999994695486;  
JX093461;Lepidoptera;Polyommatus daphnis;NA;0.058;NA;0.962780253148182;  
JX093465;Lepidoptera;Polyommatus escheri;Polyommatus escheri;1;NA;0.849301216595283;  
JX112880;Lepidoptera;Satyrium pruni;NA;0.347;Satyrium pruni;0.991870503237268;  
JX112881;Lepidoptera;Satyrium spini;Satyrium spini;1;Satyrium spini;0.999992332933321;  
JX112882;Lepidoptera;Satyrium w-album;NA;0.142;Satyrium walbum;0.704884797922891;  
JX112886;Lepidoptera;Satyrium acaciae;Satyrium acaciae;1;Satyrium acaciae;0.999999726506227;  
JX112887;Lepidoptera;Satyrium ilicis;Satyrium ilicis;1;Satyrium ilicis;0.99999980777432;  
JX155755;Lepidoptera;Erebia pronoe;NA;0.002;NA;0.999991228117973;  
JX155756;Lepidoptera;Erebia pronoe;Erebia pronoe;0.001;Erebia pronoe;0.837490350528977;  
JX311250;Lepidoptera;Phengaris teleius;NA;0.001;NA;0.830140871479552;  
JX311251;Lepidoptera;Phengaris teleius;Phengaris teleius;1;NA;0.767566236602233;  
JX311254;Lepidoptera;Phengaris teleius;NA;0.192;NA;0.822313378426264;  
JX311255;Lepidoptera;Phengaris teleius;NA;0.488;NA;0.814102909812003;  
JX311260;Lepidoptera;Phengaris teleius;NA;0.495;NA;0.815636694559594;  
JX311261;Lepidoptera;Phengaris teleius;NA;0.488;NA;0.823545101572831;  
JX311262;Lepidoptera;Phengaris teleius;NA;0.488;NA;0.922548956175661;  
JX311263;Lepidoptera;Phengaris teleius;NA;0.493;NA;0.823421349863848;  
JX311264;Lepidoptera;Phengaris teleius;NA;0.488;NA;0.922548956175661;  
JX311265;Lepidoptera;Phengaris teleius;NA;0.488;NA;0.900697937585587;  
JX311266;Lepidoptera;Phengaris teleius;NA;0.488;NA;0.900697937585587;  
JX678023;Lepidoptera;Aricia cramera;Aricia cramera;1;Aricia cramera;0.999994694491994;  
JX678024;Lepidoptera;Aricia cramera;Aricia cramera;1;Aricia cramera;0.999994694491994;  
JX678025;Lepidoptera;Aricia cramera;Aricia cramera;1;Aricia cramera;0.999994694491994;  
JX678026;Lepidoptera;Aricia cramera;Aricia cramera;1;Aricia cramera;0.999994694491994;  
JX678027;Lepidoptera;Aricia cramera;Aricia cramera;1;Aricia cramera;0.999993970273909;  
JX678028;Lepidoptera;Aricia cramera;Aricia cramera;1;Aricia cramera;0.999993970273909;  
JX678030;Lepidoptera;Aricia cramera;Aricia cramera;1;Aricia cramera;0.999993970273909;  
JX678031;Lepidoptera;Aricia cramera;Aricia cramera;1;Aricia cramera;0.999993970273909;  
JX678032;Lepidoptera;Aricia cramera;Aricia cramera;1;Aricia cramera;0.999993970273909;  
JX678033;Lepidoptera;Aricia cramera;Aricia cramera;1;Aricia cramera;0.999996928694627;  
JX678034;Lepidoptera;Aricia cramera;Aricia cramera;1;Aricia cramera;0.999996928694627;  
JX678035;Lepidoptera;Aricia cramera;Aricia cramera;1;Aricia cramera;0.999993970273909;  
JX678036;Lepidoptera;Aricia cramera;Aricia cramera;1;Aricia cramera;0.999993970273909;  
JX678039;Lepidoptera;Aricia cramera;Aricia cramera;1;Aricia cramera;0.99999593445832;  
JX678040;Lepidoptera;Aricia cramera;Aricia cramera;1;Aricia cramera;0.99999644604876;  
JX678041;Lepidoptera;Aricia cramera;Aricia cramera;1;Aricia cramera;0.999995501900228;  
JX678042;Lepidoptera;Aricia cramera;Aricia cramera;1;Aricia cramera;0.999993970273909;  
JX678043;Lepidoptera;Aricia cramera;Aricia cramera;1;Aricia cramera;0.999991041622588;  
JX678044;Lepidoptera;Aricia cramera;Aricia cramera;1;Aricia cramera;0.999994694491994;  
JX678045;Lepidoptera;Aricia cramera;Aricia cramera;1;Aricia cramera;0.999994694491994;  
JX678048;Lepidoptera;Aricia cramera;Aricia cramera;1;Aricia cramera;0.999994694491994;  
JX678049;Lepidoptera;Aricia cramera;Aricia cramera;1;Aricia cramera;0.999993993168339;  
JX678050;Lepidoptera;Aricia cramera;Aricia cramera;1;Aricia cramera;0.999993993168339;  
JX678052;Lepidoptera;Aricia artaxerxes;NA;0.412;Aricia artaxerxes;0.99955436728994;  
JX678053;Lepidoptera;Aricia artaxerxes;NA;0.412;Aricia artaxerxes;0.99955436728994;  
JX678054;Lepidoptera;Aricia artaxerxes;NA;0.412;Aricia artaxerxes;0.99955436728994;  
JX678055;Lepidoptera;Aricia artaxerxes;Plebejus argus;1;Aricia artaxerxes;0.99976599124702;  
JX678056;Lepidoptera;Aricia artaxerxes;Plebejus argus;1;Aricia artaxerxes;0.99976599124702;  
JX678058;Lepidoptera;Aricia artaxerxes;NA;0.143;Aricia artaxerxes;0.999805001123268;  
JX678063;Lepidoptera;Aricia agestis;NA;0.034;Aricia agestis;0.999538578806676;  
JX678064;Lepidoptera;Aricia agestis;NA;0.034;Aricia agestis;0.999538578806676;  
JX678071;Lepidoptera;Aricia agestis;NA;0.064;Aricia agestis;0.995841086018724;  
JX678072;Lepidoptera;Aricia agestis;NA;0.064;Aricia agestis;0.995841086018724;  
JX678078;Lepidoptera;Aricia artaxerxes;Plebejus argus;1;Aricia artaxerxes;0.99976599124702;  
JX678080;Lepidoptera;Aricia artaxerxes;Plebejus argus;1;Aricia artaxerxes;0.99976599124702;  
JX678081;Lepidoptera;Aricia artaxerxes;Plebejus argus;1;Aricia artaxerxes;0.99976599124702;  
JX678082;Lepidoptera;Aricia artaxerxes;Plebejus argus;1;Aricia artaxerxes;0.99976599124702;  
JX678083;Lepidoptera;Aricia artaxerxes;Plebejus argus;1;Aricia artaxerxes;0.99976599124702;  
JX678084;Lepidoptera;Aricia artaxerxes;Plebejus argus;1;Aricia artaxerxes;0.99976599124702;  
JX678085;Lepidoptera;Aricia artaxerxes;Plebejus argus;1;Aricia artaxerxes;0.99976599124702;  
JX678087;Lepidoptera;Aricia artaxerxes;NA;0.383;Aricia artaxerxes;0.999829424590954;  
JX678088;Lepidoptera;Aricia artaxerxes;NA;0.383;Aricia artaxerxes;0.999829424590954;  
JX678089;Lepidoptera;Aricia artaxerxes;NA;0.412;Aricia artaxerxes;0.99955436728994;  
JX678090;Lepidoptera;Aricia artaxerxes;NA;0.412;Aricia artaxerxes;0.99955436728994;  
JX678093;Lepidoptera;Polyommatus thersites;Polyommatus thersites;0.003;Polyommatus thersites;0.99999936691014;  
JX678097;Lepidoptera;Aricia artaxerxes;NA;0.001;Aricia artaxerxes;0.998800871462615;  
JX678098;Lepidoptera;Aricia artaxerxes;NA;0.001;Aricia artaxerxes;0.998800871462615;  
JX678100;Lepidoptera;Aricia artaxerxes;NA;0.062;Aricia artaxerxes;0.999560771556993;  
JX678105;Lepidoptera;Aricia artaxerxes;NA;0.057;Aricia artaxerxes;0.998733206230977;  
JX678106;Lepidoptera;Aricia artaxerxes;NA;0.136;Aricia artaxerxes;0.999466097136126;  
JX678115;Lepidoptera;Aricia agestis;NA;0.091;Aricia agestis;0.998135413168303;  
JX678118;Lepidoptera;Aricia agestis;NA;0.306;Aricia agestis;0.993846455426407;  
JX678119;Lepidoptera;Aricia agestis;NA;0.306;Aricia agestis;0.993846455426407;  
JX678120;Lepidoptera;Aricia agestis;NA;0.306;Aricia agestis;0.993846455426407;  
JX678121;Lepidoptera;Aricia agestis;NA;0.306;Aricia agestis;0.993846455426407;  
JX678122;Lepidoptera;Aricia agestis;NA;0.306;Aricia agestis;0.993846455426407;

JX678123;Lepidoptera;Aricia agestis;NA;NA;Aricia agestis;0.996270377984369;  
JX678124;Lepidoptera;Aricia agestis;NA;NA;Aricia agestis;0.996270377984369;  
JX678125;Lepidoptera;Aricia agestis;NA;NA;Aricia agestis;0.996270377984369;  
JX678127;Lepidoptera;Aricia agestis;NA;NA;Aricia agestis;0.996270377984369;  
JX678128;Lepidoptera;Aricia agestis;NA;NA;Aricia agestis;0.996270377984369;  
JX678129;Lepidoptera;Aricia agestis;NA;NA;Aricia agestis;0.996270377984369;  
JX678130;Lepidoptera;Aricia agestis;NA;0.073;Aricia agestis;0.999504421887332;  
JX678131;Lepidoptera;Aricia agestis;NA;0.073;Aricia agestis;0.999504421887332;  
JX678132;Lepidoptera;Aricia agestis;NA;0.085;Aricia agestis;0.998833911707261;  
JX678134;Lepidoptera;Aricia agestis;Aricia agestis;1;Aricia agestis;0.971536179996815;  
JX678135;Lepidoptera;Aricia agestis;NA;0.1;Aricia agestis;0.990272297705663;  
JX678137;Lepidoptera;Aricia agestis;Aricia agestis;1;Aricia agestis;0.990793357852564;  
JX678138;Lepidoptera;Aricia agestis;Aricia agestis;1;Aricia agestis;0.978864665329184;  
JX678140;Lepidoptera;Aricia agestis;NA;0.073;Aricia agestis;0.999504421887332;  
JX678144;Lepidoptera;Aricia agestis;NA;0.037;Aricia agestis;0.997482346124557;  
JX678145;Lepidoptera;Aricia agestis;NA;0.039;Aricia agestis;0.996032662733461;  
JX678146;Lepidoptera;Aricia agestis;NA;0.169;Aricia agestis;0.996445434287717;  
JX678148;Lepidoptera;Aricia agestis;NA;0.075;Aricia agestis;0.998336166156409;  
JX678149;Lepidoptera;Aricia agestis;NA;0.001;Aricia agestis;0.996102156007606;  
JX678150;Lepidoptera;Aricia cramera;Aricia cramera;1;Aricia cramera;0.999994172405776;  
JX678151;Lepidoptera;Aricia agestis;NA;0.12;Aricia agestis;0.991347816891068;  
JX678152;Lepidoptera;Aricia agestis;NA;0.07;Aricia agestis;0.987216246615008;  
JX678166;Lepidoptera;Polyommatus icarus;Polyommatus icarus;0.003;Polyommatus  
icarus;0.999850577436282;  
JX678168;Lepidoptera;Aricia artaxerxes;NA;0.002;Aricia artaxerxes;0.99972102469214;  
KC208818;Lepidoptera;Helleia helle;Lycaena helle;1;Lycaena helle;0.999999988262175;  
KC208819;Lepidoptera;Helleia helle;Lycaena helle;1;Lycaena helle;0.999999988262175;  
KC208820;Lepidoptera;Helleia helle;Lycaena helle;1;Lycaena helle;0.999999988262175;  
KC208821;Lepidoptera;Helleia helle;Lycaena helle;1;Lycaena helle;0.999999988262175;  
KC208822;Lepidoptera;Helleia helle;Lycaena helle;1;Lycaena helle;0.999999988262175;  
KC208823;Lepidoptera;Helleia helle;Lycaena helle;1;Lycaena helle;0.999999988262175;  
KC208846;Lepidoptera;Helleia helle;Lycaena helle;1;Lycaena helle;0.999999988262175;  
KC208847;Lepidoptera;Helleia helle;Lycaena helle;1;Lycaena helle;0.999999988262175;  
KC208848;Lepidoptera;Helleia helle;Lycaena helle;1;Lycaena helle;0.999999988262175;  
KC208849;Lepidoptera;Helleia helle;Lycaena helle;1;Lycaena helle;0.999999988262175;  
KC462812;Lepidoptera;Pieris napi;NA;NA;NA;0.999987701561402;  
KC462816;Lepidoptera;Pieris rapae;NA;NA;Pieris rapae;0.999992588119495;  
KC462817;Lepidoptera;Pieris rapae;NA;0.206;Pieris rapae;0.999929773639513;  
KC462818;Lepidoptera;Pieris rapae;Pieris rapae;0.005;Pieris rapae;0.999986343554325;  
KC465909;Lepidoptera;Melitaea cinxia;Melitaea cinxia;0.02;Melitaea cinxia;0.99999999996777;  
KC465910;Lepidoptera;Melitaea cinxia;Melitaea cinxia;NA;Melitaea cinxia;0.99999999998977;  
KC465911;Lepidoptera;Melitaea cinxia;Melitaea cinxia;0.014;Melitaea cinxia;0.99999999991047;  
KC465912;Lepidoptera;Melitaea cinxia;Melitaea cinxia;0.014;Melitaea cinxia;0.99999999991047;  
KC465913;Lepidoptera;Melitaea cinxia;NA;0.069;Melitaea cinxia;0.999999999934317;  
KC465914;Lepidoptera;Melitaea cinxia;NA;0.069;Melitaea cinxia;0.999999999934317;  
KC465915;Lepidoptera;Melitaea cinxia;NA;0.076;Melitaea cinxia;0.999999999980759;  
KC465916;Lepidoptera;Melitaea cinxia;Melitaea cinxia;0.002;Melitaea cinxia;0.999999999940655;  
KC465917;Lepidoptera;Melitaea cinxia;Melitaea cinxia;1;Melitaea cinxia;0.999999999947676;  
KC618686;Lepidoptera;Lycaena dispar;Lycaena dispar;1;Lycaena dispar;0.99999897700212;  
KC660004;Lepidoptera;Lycaena thersamon;NA;NA;Lycaena thersamon;0.92102252798935;  
KC676695;Lepidoptera;Lycaena phlaeas;Lycaena phlaeas;1;Lycaena phlaeas;0.999999637440036;  
KC676696;Lepidoptera;Thecla betulae;Thecla betulae;1;Thecla betulae;0.99999999219568;  
KC676699;Lepidoptera;Cupido argiades;NA;0.164;Cupido argiades;0.775010632974806;  
KC676700;Lepidoptera;Cupido osiris;Cupido osiris;1;Cupido osiris;0.999968122272701;  
KC676703;Lepidoptera;Aricia agestis;NA;0.05;Aricia agestis;0.992504108972964;  
KC676704;Lepidoptera;Aricia artaxerxes;NA;0.002;Aricia artaxerxes;0.999288496025259;  
KC692329;Lepidoptera;Scolitantides orion;Scolitantides orion;1;Scolitantides  
orion;0.999999636228049;  
KF491989;Lepidoptera;Parnassius apollo;Parnassius apollo;1;Parnassius apollo;0.995413498609845;  
KF647226;Lepidoptera;Lycaena virgaureae;NA;0.147;Lycaena virgaureae;0.998843375757078;  
KF647230;Lepidoptera;Plebejus idas;Plebejus idas;0.002;Plebejus idas;0.85449597634936;  
KF647231;Lepidoptera;Helleia helle;Lycaena helle;1;Lycaena helle;0.99999997384478;  
KF647233;Lepidoptera;Polyommatus eros;NA;NA;NA;0.999999155867694;  
KF647235;Lepidoptera;Polyommatus dorylas;Polyommatus dorylas;0.001;Polyommatus  
dorylas;0.977714590772569;  
KF647237;Lepidoptera;Polyommatus damon;Polyommatus damon;1;Polyommatus damon;0.999983061722399;  
KF647242;Lepidoptera;Celastrina argiolus;Celastrina argiolus;NA;Celastrina  
argiolus;0.999014219778089;  
KF647245;Lepidoptera;Glaucopsyche alexis;NA;NA;Glaucopsyche alexis;0.95304363372556;  
KF647247;Lepidoptera;Cupido alcetas;Cupido alcetas;0.001;Cupido alcetas;0.985475764062565;  
KF709970;Lepidoptera;Aporia crataegi;NA;NA;Aporia crataegi;0.99999593396151;  
KF709971;Lepidoptera;Aporia crataegi;NA;NA;Aporia crataegi;0.99999593396151;  
KF709972;Lepidoptera;Aporia crataegi;NA;NA;Aporia crataegi;0.99999593396151;  
KF723539;Lepidoptera;Melitaea britomartis;NA;0.294;Melitaea ambigua;0.925280550686365;  
KF723544;Lepidoptera;Minois dryas;Minois dryas;0.012;Minois dryas;0.932618420387345;  
KF723548;Lepidoptera;Fabriciana niobe;NA;0.035;Fabriciana niobe;0.949480222958778;  
KF723550;Lepidoptera;Brenthis ino;Brenthis ino;0.998;Brenthis ino;0.995325118916732;  
KF834369;Lepidoptera;Lysandra hispana;Lysandra hispana;NA;NA;0.732361207330183;

KF860851;Lepidoptera;Polyommatus amandus;Polyommatus amandus;0.021;Polyommatus amandus;0.999824792434497;  
KF860852;Lepidoptera;Plebejus argus;NA;0.001;Plebejus argus;0.851872820025762;  
KF860853;Lepidoptera;Lampides boeticus;Lampides boeticus;1;Lampides boeticus;0.99999997755657;  
KF860855;Lepidoptera;Polyommatus daphnis;NA;0.004;Polyommatus daphnis;0.899187085008227;  
KF860856;Lepidoptera;Aricia eumedon;NA;0.058;Aricia eumedon;0.989248156947127;  
KF860857;Lepidoptera;Cupido minimus;NA;0.002;Cupido minimus;0.966044066419617;  
KF860860;Lepidoptera;Cyaniris semiargus;Cyaniris semiargus;NA;Cyaniris semiargus;0.99543201085201;  
KF860861;Lepidoptera;Polyommatus thersites;Polyommatus thersites;0.011;Polyommatus thersites;0.999991576769764;  
KJ547676;Lepidoptera;Pararge aegeria;Pararge aegeria;1;NA;0.876928955314701;  
KJ638698;Lepidoptera;Melitaea trivia;Melitaea trivia;1;Melitaea trivia;0.99999999975302;  
KJ638699;Lepidoptera;Melitaea trivia;Melitaea trivia;1;Melitaea trivia;0.99999999973596;  
KJ648990;Lepidoptera;Nymphalis c-album;NA;0.006;NA;0.999996732695115;  
KJ649004;Lepidoptera;Vanessa atalanta;Vanessa atalanta;1;Vanessa atalanta;0.99999999698275;  
KJ649005;Lepidoptera;Aglais urticae;NA;0.002;Aglais urticae;0.987437630127445;  
KJ649006;Lepidoptera;Araschnia levana;Araschnia levana;1;Araschnia levana;0.999999641700306;  
KJ649007;Lepidoptera;Vanessa cardui;Vanessa cardui;1;Vanessa cardui;0.99999203779212;  
KM020827;Lepidoptera;Maniola jurtina;NA;NA;Maniola jurtina;0.970049180822518;  
KM020828;Lepidoptera;Maniola jurtina;NA;NA;Maniola jurtina;0.953827931447544;  
KM020829;Lepidoptera;Maniola jurtina;NA;0.165;NA;0.99999999999109;  
KM020830;Lepidoptera;Maniola jurtina;NA;0.001;Maniola jurtina;0.939220105860875;  
KM020831;Lepidoptera;Maniola jurtina;Maniola jurtina;0.001;Maniola jurtina;0.953764054001816;  
KM020832;Lepidoptera;Maniola jurtina;NA;0.005;NA;0.99999999998626;  
KM020833;Lepidoptera;Maniola jurtina;Maniola jurtina;0.001;Maniola jurtina;0.953764054001816;  
KM020834;Lepidoptera;Maniola jurtina;NA;0.038;NA;0.99999999999524;  
KM020835;Lepidoptera;Maniola jurtina;NA;0.001;Maniola jurtina;0.939220105860875;  
KM020836;Lepidoptera;Maniola jurtina;NA;0.001;Maniola jurtina;0.939220105860875;  
KM020837;Lepidoptera;Maniola jurtina;NA;0.153;Maniola jurtina;0.959231900673445;  
KM020838;Lepidoptera;Maniola jurtina;NA;0.001;Maniola jurtina;0.939220105860875;  
KM020839;Lepidoptera;Maniola jurtina;NA;0.038;NA;0.99999999999524;  
KM020840;Lepidoptera;Maniola jurtina;NA;0.038;NA;0.99999999999524;  
KM020841;Lepidoptera;Maniola jurtina;NA;0.038;NA;0.99999999999524;  
KM020842;Lepidoptera;Maniola jurtina;NA;0.001;Maniola jurtina;0.939220105860875;  
KM020843;Lepidoptera;Maniola jurtina;NA;0.001;Maniola jurtina;0.922911334333417;  
KM020844;Lepidoptera;Maniola jurtina;NA;0.001;Maniola jurtina;0.939220105860875;  
KM020845;Lepidoptera;Maniola jurtina;NA;0.163;NA;0.99999999999256;  
KM020847;Lepidoptera;Maniola jurtina;NA;NA;Maniola jurtina;0.932842454558237;  
KM020848;Lepidoptera;Maniola jurtina;NA;0.038;NA;0.99999999999524;  
KM020850;Lepidoptera;Maniola jurtina;NA;0.001;Maniola jurtina;0.939220105860875;  
KM020851;Lepidoptera;Maniola jurtina;NA;0.119;Maniola jurtina;0.853294047700275;  
KM020852;Lepidoptera;Maniola jurtina;NA;0.119;Maniola jurtina;0.853294047700275;  
KM020853;Lepidoptera;Maniola jurtina;NA;0.038;NA;0.99999999999524;  
KM020855;Lepidoptera;Maniola jurtina;NA;0.038;NA;0.99999999999524;  
KM020858;Lepidoptera;Maniola jurtina;NA;0.038;NA;0.99999999999524;  
KM020860;Lepidoptera;Maniola jurtina;NA;0.038;NA;0.99999999999524;  
KM020861;Lepidoptera;Maniola jurtina;NA;0.119;Maniola jurtina;0.853294047700275;  
KM020862;Lepidoptera;Maniola jurtina;NA;0.038;NA;0.99999999999524;  
KM020864;Lepidoptera;Maniola jurtina;NA;0.038;NA;0.99999999999524;  
KM020866;Lepidoptera;Maniola jurtina;NA;0.038;NA;0.99999999999524;  
KM020867;Lepidoptera;Maniola jurtina;NA;0.157;Maniola jurtina;0.72935823378201;  
KM020868;Lepidoptera;Maniola jurtina;NA;NA;Maniola jurtina;0.940008002647499;  
KM020870;Lepidoptera;Maniola jurtina;NA;0.119;Maniola jurtina;0.853294047700275;  
KM020871;Lepidoptera;Maniola jurtina;NA;0.038;NA;0.99999999999524;  
KM033847;Lepidoptera;Maniola jurtina;NA;0.003;Maniola jurtina;0.93622146239045;  
KM033848;Lepidoptera;Maniola jurtina;NA;0.005;Maniola jurtina;0.714129421849189;  
KM033849;Lepidoptera;Maniola jurtina;NA;0.005;Maniola jurtina;0.714129421849189;  
KM033850;Lepidoptera;Maniola jurtina;NA;0.001;Maniola jurtina;0.939220105860875;  
KM033852;Lepidoptera;Maniola jurtina;NA;0.001;Maniola jurtina;0.939220105860875;  
KM033853;Lepidoptera;Maniola jurtina;NA;0.038;NA;0.99999999999524;  
KM033855;Lepidoptera;Maniola jurtina;NA;0.146;NA;0.99999999999341;  
KM033858;Lepidoptera;Maniola jurtina;NA;0.157;Maniola jurtina;0.72935823378201;  
KM033859;Lepidoptera;Maniola jurtina;NA;0.015;NA;0.99999999999554;  
KM033860;Lepidoptera;Maniola jurtina;NA;0.038;NA;0.99999999999524;  
KM033861;Lepidoptera;Maniola jurtina;NA;0.038;NA;0.99999999999524;  
KM033862;Lepidoptera;Maniola jurtina;NA;0.001;Maniola jurtina;0.939220105860875;  
KM033864;Lepidoptera;Maniola jurtina;NA;NA;Maniola jurtina;0.746095236282775;  
KM033865;Lepidoptera;Maniola jurtina;NA;0.038;NA;0.99999999999524;  
KM033866;Lepidoptera;Maniola jurtina;NA;0.038;NA;0.99999999999524;  
KM033872;Lepidoptera;Maniola jurtina;NA;0.038;NA;0.99999999999524;  
KM033873;Lepidoptera;Maniola jurtina;NA;NA;NA;0.999999999998784;  
KM033874;Lepidoptera;Maniola jurtina;NA;0.038;NA;0.99999999999524;  
KM033875;Lepidoptera;Maniola jurtina;NA;0.008;Maniola jurtina;0.769922062887517;  
KM033876;Lepidoptera;Maniola jurtina;NA;0.038;NA;0.99999999999524;  
KM033877;Lepidoptera;Maniola jurtina;NA;0.038;NA;0.99999999999524;  
KM033878;Lepidoptera;Maniola jurtina;NA;0.038;NA;0.99999999999524;  
KM033879;Lepidoptera;Maniola jurtina;NA;0.038;NA;0.99999999999524;

KM033880;Lepidoptera;Maniola jurtina;NA;0.007;NA;0.99999999999192;  
KM033881;Lepidoptera;Maniola jurtina;NA;0.038;NA;0.99999999999524;  
KM033882;Lepidoptera;Maniola jurtina;NA;0.018;Maniola jurtina;0.718000045815069;  
KM033883;Lepidoptera;Maniola jurtina;NA;0.169;NA;0.99999999999053;  
KM033884;Lepidoptera;Maniola jurtina;NA;0.038;NA;0.99999999999524;  
KM033885;Lepidoptera;Maniola jurtina;NA;0.032;Maniola jurtina;0.713438248133508;  
KM033886;Lepidoptera;Maniola jurtina;NA;0.025;Maniola jurtina;0.705010888933137;  
KM033888;Lepidoptera;Maniola jurtina;NA;0.02;NA;0.99999999999197;  
KM033889;Lepidoptera;Maniola jurtina;NA;NA;NA;0.999999999998784;  
KM033893;Lepidoptera;Maniola jurtina;NA;0.008;Maniola jurtina;0.945994690405052;  
KM033896;Lepidoptera;Maniola jurtina;NA;0.001;Maniola jurtina;0.939220105860875;  
KM033897;Lepidoptera;Maniola jurtina;NA;0.001;Maniola jurtina;0.939220105860875;  
KM033898;Lepidoptera;Maniola jurtina;NA;0.013;Maniola jurtina;0.936595709375125;  
KM033899;Lepidoptera;Maniola jurtina;NA;0.009;Maniola jurtina;0.952535358390331;  
KM033901;Lepidoptera;Maniola jurtina;NA;0.001;Maniola jurtina;0.939220105860875;  
KM033902;Lepidoptera;Maniola jurtina;NA;0.157;Maniola jurtina;0.72935823378201;  
KM033904;Lepidoptera;Maniola jurtina;NA;0.169;NA;0.99999999999053;  
KM033905;Lepidoptera;Maniola jurtina;NA;0.063;Maniola jurtina;0.770025363931686;  
KM033906;Lepidoptera;Maniola jurtina;NA;0.119;Maniola jurtina;0.853294047700275;  
KM033907;Lepidoptera;Maniola jurtina;NA;0.038;NA;0.99999999999524;  
KM033908;Lepidoptera;Maniola jurtina;NA;0.038;NA;0.99999999999524;  
KM033909;Lepidoptera;Maniola jurtina;NA;0.001;Maniola jurtina;0.939220105860875;  
KM033910;Lepidoptera;Maniola jurtina;NA;0.001;Maniola jurtina;0.939220105860875;  
KM033911;Lepidoptera;Maniola jurtina;NA;0.001;Maniola jurtina;0.939220105860875;  
KM033912;Lepidoptera;Maniola jurtina;NA;0.001;Maniola jurtina;0.939220105860875;  
KM033914;Lepidoptera;Maniola jurtina;NA;0.001;Maniola jurtina;0.939220105860875;  
KM033915;Lepidoptera;Maniola jurtina;NA;0.146;NA;0.99999999999341;  
KM033916;Lepidoptera;Maniola jurtina;NA;0.038;NA;0.99999999999524;  
KM033917;Lepidoptera;Maniola jurtina;NA;0.038;NA;0.99999999999524;  
KM033918;Lepidoptera;Maniola jurtina;NA;0.038;NA;0.99999999999524;  
KM033919;Lepidoptera;Maniola jurtina;NA;0.157;Maniola jurtina;0.72935823378201;  
KM033920;Lepidoptera;Maniola jurtina;NA;0.001;Maniola jurtina;0.939220105860875;  
KM033922;Lepidoptera;Maniola jurtina;NA;0.004;Maniola jurtina;0.86894499343177;  
KM033923;Lepidoptera;Maniola jurtina;NA;0.001;Maniola jurtina;0.939220105860875;  
KM033924;Lepidoptera;Maniola jurtina;NA;0.038;NA;0.99999999999524;  
KM033925;Lepidoptera;Maniola jurtina;NA;0.001;Maniola jurtina;0.939220105860875;  
KM033926;Lepidoptera;Maniola jurtina;NA;0.038;NA;0.99999999999524;  
KM033927;Lepidoptera;Maniola jurtina;NA;0.022;NA;0.99999999999563;  
KM033928;Lepidoptera;Maniola jurtina;NA;0.001;Maniola jurtina;0.939220105860875;  
KM033929;Lepidoptera;Maniola jurtina;NA;0.001;Maniola jurtina;0.939220105860875;  
KM033930;Lepidoptera;Maniola jurtina;NA;0.001;Maniola jurtina;0.939220105860875;  
KM033935;Lepidoptera;Maniola jurtina;NA;0.023;Maniola jurtina;0.732198397368727;  
KM033936;Lepidoptera;Maniola jurtina;NA;0.001;Maniola jurtina;0.939220105860875;  
KM033937;Lepidoptera;Maniola jurtina;NA;0.008;Maniola jurtina;0.721530652332321;  
KM033939;Lepidoptera;Maniola jurtina;NA;0.008;Maniola jurtina;0.721530652332321;  
KM033940;Lepidoptera;Maniola jurtina;NA;0.038;NA;0.99999999999524;  
KM033941;Lepidoptera;Maniola jurtina;NA;0.001;Maniola jurtina;0.939220105860875;  
KM196530;Lepidoptera;Erebia euryale;NA;NA;Erebia euryale;0.911949726023156;  
KM459029;Lepidoptera;Aricia agestis;NA;0.067;Aricia agestis;0.999509743227786;  
KM459030;Lepidoptera;Aricia agestis;NA;0.253;Aricia agestis;0.996350017387504;  
KM459031;Lepidoptera;Aricia agestis;NA;0.067;Aricia agestis;0.999509743227786;  
KM459032;Lepidoptera;Aricia agestis;NA;NA;Aricia agestis;0.993980512246517;  
KM459033;Lepidoptera;Aricia agestis;NA;0.253;Aricia agestis;0.996350017387504;  
KM459034;Lepidoptera;Aricia agestis;NA;0.253;Aricia agestis;0.996350017387504;  
KM459035;Lepidoptera;Aricia agestis;NA;0.253;Aricia agestis;0.996350017387504;  
KM459036;Lepidoptera;Aricia agestis;NA;0.003;Aricia agestis;0.998094186768341;  
KM459037;Lepidoptera;Aricia agestis;NA;0.253;Aricia agestis;0.996350017387504;  
KM459038;Lepidoptera;Aricia agestis;NA;0.069;Aricia agestis;0.995918114091591;  
KM459039;Lepidoptera;Aricia agestis;NA;0.253;Aricia agestis;0.996350017387504;  
KM459040;Lepidoptera;Aricia agestis;NA;0.389;Aricia agestis;0.995319636523153;  
KM459041;Lepidoptera;Aricia agestis;NA;NA;Aricia agestis;0.993980512246517;  
KM459042;Lepidoptera;Aricia agestis;Aricia agestis;1;Aricia agestis;0.985110124660693;  
KM459043;Lepidoptera;Aricia agestis;NA;0.253;Aricia agestis;0.996350017387504;  
KM459044;Lepidoptera;Aricia agestis;NA;0.004;Aricia agestis;0.994726192422807;  
KM459045;Lepidoptera;Aricia agestis;NA;NA;Aricia agestis;0.993980512246517;  
KM459046;Lepidoptera;Aricia agestis;Aricia agestis;0.002;Aricia agestis;0.99978486076089;  
KM459047;Lepidoptera;Aricia agestis;Aricia agestis;1;Aricia agestis;0.979315827401608;  
KM459048;Lepidoptera;Aricia agestis;Aricia agestis;1;Aricia agestis;0.979315827401608;  
KM459049;Lepidoptera;Aricia agestis;Aricia agestis;1;Aricia agestis;0.979315827401608;  
KM459050;Lepidoptera;Aricia agestis;Aricia agestis;1;Aricia agestis;0.979315827401608;  
KM459051;Lepidoptera;Aricia agestis;Aricia agestis;1;Aricia agestis;0.979315827401608;  
KM459052;Lepidoptera;Aricia agestis;NA;NA;Aricia agestis;0.990477247955767;  
KM459053;Lepidoptera;Aricia agestis;Aricia agestis;0.001;Aricia agestis;0.972120797608056;  
KM459054;Lepidoptera;Aricia agestis;Aricia agestis;1;Aricia agestis;0.983952687998024;  
KM459055;Lepidoptera;Aricia agestis;NA;NA;Aricia agestis;0.990477247955767;  
KM459056;Lepidoptera;Aricia agestis;NA;0.038;Aricia agestis;0.993235151962273;  
KM459057;Lepidoptera;Aricia agestis;Aricia agestis;0.002;Aricia agestis;0.962305544143764;  
KM459058;Lepidoptera;Aricia agestis;Aricia agestis;0.001;Aricia agestis;0.972120797608056;

|           |                    |                   |                                   |                            |
|-----------|--------------------|-------------------|-----------------------------------|----------------------------|
| KM459059; | Lepidoptera;Aricia | agestis;Aricia    | agestis;0.001;Aricia              | agestis;0.972120797608056; |
| KM459060; | Lepidoptera;Aricia | agestis;Aricia    | agestis;1;Aricia                  | agestis;0.979315827401608; |
| KM459061; | Lepidoptera;Aricia | agestis;Aricia    | agestis;1;Aricia                  | agestis;0.979315827401608; |
| KM459062; | Lepidoptera;Aricia | agestis;Aricia    | agestis;1;Aricia                  | agestis;0.988437755993415; |
| KM459063; | Lepidoptera;Aricia | agestis;Aricia    | agestis;1;Aricia                  | agestis;0.979315827401608; |
| KM459064; | Lepidoptera;Aricia | agestis;Aricia    | agestis;1;Aricia                  | agestis;0.979315827401608; |
| KM459065; | Lepidoptera;Aricia | agestis;Aricia    | agestis;1;Aricia                  | agestis;0.979315827401608; |
| KM459066; | Lepidoptera;Aricia | agestis;Aricia    | agestis;1;Aricia                  | agestis;0.988018465556624; |
| KM459067; | Lepidoptera;Aricia | agestis;Aricia    | agestis;1;Aricia                  | agestis;0.979315827401608; |
| KM459068; | Lepidoptera;Aricia | agestis;NA;0.067; | Aricia agestis;0.999509743227786; |                            |
| KM459069; | Lepidoptera;Aricia | agestis;NA;NA;    | Aricia agestis;0.996930365249266; |                            |
| KM459070; | Lepidoptera;Aricia | agestis;Aricia    | agestis;0.001;Aricia              | agestis;0.972120797608056; |
| KM459071; | Lepidoptera;Aricia | agestis;NA;0.099; | Aricia agestis;0.994857168775148; |                            |
| KM459072; | Lepidoptera;Aricia | agestis;NA;0.253; | Aricia agestis;0.996350017387504; |                            |
| KM459073; | Lepidoptera;Aricia | agestis;NA;0.067; | Aricia agestis;0.999509743227786; |                            |
| KM459074; | Lepidoptera;Aricia | agestis;NA;0.046; | Aricia agestis;0.999133913416159; |                            |
| KM459075; | Lepidoptera;Aricia | agestis;NA;0.253; | Aricia agestis;0.996350017387504; |                            |
| KM459076; | Lepidoptera;Aricia | agestis;NA;0.253; | Aricia agestis;0.996350017387504; |                            |
| KM459077; | Lepidoptera;Aricia | agestis;NA;0.003; | Aricia agestis;0.998094186768341; |                            |
| KM459078; | Lepidoptera;Aricia | agestis;NA;0.278; | Aricia agestis;0.993115831599498; |                            |
| KM459079; | Lepidoptera;Aricia | agestis;Aricia    | agestis;1;Aricia                  | agestis;0.988018465556624; |
| KM459080; | Lepidoptera;Aricia | agestis;Aricia    | agestis;1;Aricia                  | agestis;0.988018465556624; |
| KM459081; | Lepidoptera;Aricia | agestis;NA;0.253; | Aricia agestis;0.996350017387504; |                            |
| KM459082; | Lepidoptera;Aricia | agestis;NA;0.253; | Aricia agestis;0.996350017387504; |                            |
| KM459083; | Lepidoptera;Aricia | agestis;Aricia    | agestis;0.001;Aricia              | agestis;0.972120797608056; |
| KM459084; | Lepidoptera;Aricia | agestis;Aricia    | agestis;0.001;Aricia              | agestis;0.972120797608056; |
| KM459085; | Lepidoptera;Aricia | agestis;Aricia    | agestis;0.002;Aricia              | agestis;0.99978486076089;  |
| KM459086; | Lepidoptera;Aricia | agestis;NA;0.253; | Aricia agestis;0.996350017387504; |                            |
| KM459087; | Lepidoptera;Aricia | agestis;NA;0.253; | Aricia agestis;0.996350017387504; |                            |
| KM459088; | Lepidoptera;Aricia | agestis;NA;0.253; | Aricia agestis;0.996350017387504; |                            |
| KM459089; | Lepidoptera;Aricia | agestis;NA;0.03;  | Aricia agestis;0.999295990875121; |                            |
| KM459090; | Lepidoptera;Aricia | agestis;NA;0.101; | Aricia agestis;0.993514047526397; |                            |
| KM459091; | Lepidoptera;Aricia | agestis;Aricia    | agestis;1;Aricia                  | agestis;0.979315827401608; |
| KM459092; | Lepidoptera;Aricia | agestis;Aricia    | agestis;1;Aricia                  | agestis;0.979315827401608; |
| KM459093; | Lepidoptera;Aricia | agestis;Aricia    | agestis;1;Aricia                  | agestis;0.978996764450968; |
| KM459094; | Lepidoptera;Aricia | agestis;Aricia    | agestis;1;Aricia                  | agestis;0.988018465556624; |
| KM459095; | Lepidoptera;Aricia | agestis;NA;0.253; | Aricia agestis;0.996350017387504; |                            |
| KM459096; | Lepidoptera;Aricia | agestis;NA;0.101; | Aricia agestis;0.998279476999417; |                            |
| KM459097; | Lepidoptera;Aricia | agestis;NA;0.101; | Aricia agestis;0.998279476999417; |                            |
| KM459098; | Lepidoptera;Aricia | agestis;NA;0.101; | Aricia agestis;0.998279476999417; |                            |
| KM459099; | Lepidoptera;Aricia | agestis;NA;0.253; | Aricia agestis;0.996350017387504; |                            |
| KM459100; | Lepidoptera;Aricia | agestis;NA;0.253; | Aricia agestis;0.996350017387504; |                            |
| KM459101; | Lepidoptera;Aricia | agestis;Aricia    | agestis;1;Aricia                  | agestis;0.979315827401608; |
| KM459102; | Lepidoptera;Aricia | agestis;Aricia    | agestis;1;Aricia                  | agestis;0.978864665329184; |
| KM459103; | Lepidoptera;Aricia | agestis;NA;0.067; | Aricia agestis;0.999509743227786; |                            |
| KM459104; | Lepidoptera;Aricia | agestis;Aricia    | agestis;0.001;Aricia              | agestis;0.972120797608056; |
| KM459105; | Lepidoptera;Aricia | cramera;Aricia    | cramera;1;Aricia                  | cramera;0.999993731037033; |
| KM459106; | Lepidoptera;Aricia | cramera;Aricia    | cramera;1;Aricia                  | cramera;0.999993731037033; |
| KM459107; | Lepidoptera;Aricia | cramera;Aricia    | cramera;1;Aricia                  | cramera;0.999993731037033; |
| KM459108; | Lepidoptera;Aricia | cramera;Aricia    | cramera;1;Aricia                  | cramera;0.999993731037033; |
| KM459109; | Lepidoptera;Aricia | cramera;Aricia    | cramera;1;Aricia                  | cramera;0.999996788515018; |
| KM459110; | Lepidoptera;Aricia | cramera;Aricia    | cramera;1;Aricia                  | cramera;                   |



[illegible]

[illegible]

KM459274;Lepidoptera;Polyommatus celina;Polyommatus celina;0.982;Polyommatus celina;0.99999999352411;  
KM459275;Lepidoptera;Polyommatus celina;Polyommatus celina;0.983;Polyommatus celina;0.99999999342975;  
KM459276;Lepidoptera;Polyommatus celina;Polyommatus celina;0.007;Polyommatus celina;0.99999999839019;  
KM459277;Lepidoptera;Polyommatus celina;NA;0.021;Polyommatus celina;0.99999999814662;  
KM459278;Lepidoptera;Polyommatus celina;Polyommatus celina;0.009;Polyommatus celina;0.99999999739714;  
KM459279;Lepidoptera;Polyommatus celina;Polyommatus celina;0.001;Polyommatus celina;0.9999999974969;  
KM459280;Lepidoptera;Polyommatus celina;NA;0.021;Polyommatus celina;0.99999999814662;  
KM459281;Lepidoptera;Polyommatus celina;Polyommatus celina;0.007;Polyommatus celina;0.99999999839019;  
KM459282;Lepidoptera;Polyommatus celina;Polyommatus celina;0.983;Polyommatus celina;0.99999999619718;  
KM459283;Lepidoptera;Polyommatus celina;Polyommatus celina;0.983;Polyommatus celina;0.99999999379384;  
KM459284;Lepidoptera;Polyommatus celina;Polyommatus celina;0.009;Polyommatus celina;0.99999999739714;  
KM459285;Lepidoptera;Polyommatus celina;Polyommatus celina;0.023;Polyommatus celina;0.99999999971379;  
KM459288;Lepidoptera;Polyommatus celina;Polyommatus celina;0.001;Polyommatus celina;0.99999999717033;  
KM459289;Lepidoptera;Polyommatus celina;Polyommatus celina;0.007;Polyommatus celina;0.99999999909107;  
KM459290;Lepidoptera;Polyommatus celina;NA;0.067;Polyommatus celina;0.99999999867015;  
KM459291;Lepidoptera;Polyommatus celina;NA;0.072;Polyommatus celina;0.99999999953559;  
KM459295;Lepidoptera;Polyommatus celina;Polyommatus celina;0.997;Polyommatus celina;0.999999998146563;  
KM459296;Lepidoptera;Polyommatus celina;Polyommatus celina;0.001;Polyommatus celina;0.99999999623128;  
KM459297;Lepidoptera;Polyommatus celina;Polyommatus celina;0.995;Polyommatus celina;0.999999999552301;  
KM459298;Lepidoptera;Polyommatus celina;Polyommatus celina;1;Polyommatus celina;0.99999999639783;  
KM459299;Lepidoptera;Polyommatus celina;Polyommatus celina;0.007;Polyommatus celina;0.99999999839019;  
KM459300;Lepidoptera;Polyommatus celina;Polyommatus celina;0.999;Polyommatus celina;0.99999999287951;  
KM459301;Lepidoptera;Polyommatus celina;NA;0.021;Polyommatus celina;0.99999999814662;  
KM459302;Lepidoptera;Polyommatus celina;NA;0.021;Polyommatus celina;0.99999999814662;  
KM459303;Lepidoptera;Polyommatus celina;Polyommatus celina;0.992;Polyommatus celina;0.9999999963805;  
KM459304;Lepidoptera;Polyommatus celina;Polyommatus celina;0.983;Polyommatus celina;0.99999999652459;  
KM459305;Lepidoptera;Polyommatus celina;Polyommatus celina;0.998;Polyommatus celina;0.9999999949253;  
KM459306;Lepidoptera;Polyommatus celina;Polyommatus celina;0.001;Polyommatus celina;0.99999999358465;  
KM459307;Lepidoptera;Polyommatus celina;Polyommatus celina;0.001;Polyommatus celina;0.99999999841947;  
KM459308;Lepidoptera;Polyommatus celina;NA;0.011;Polyommatus celina;0.99999999924682;  
KM459309;Lepidoptera;Polyommatus celina;Polyommatus celina;1;Polyommatus celina;0.99999999721325;  
KM459310;Lepidoptera;Polyommatus celina;Polyommatus celina;0.001;Polyommatus celina;0.99999999717033;  
KM459311;Lepidoptera;Polyommatus celina;Polyommatus celina;0.001;Polyommatus celina;0.99999999717033;  
KM459312;Lepidoptera;Polyommatus celina;Polyommatus celina;0.999;Polyommatus celina;0.9999999964686;  
KM459313;Lepidoptera;Polyommatus celina;Polyommatus celina;1;Polyommatus celina;0.99999999721325;  
KM459314;Lepidoptera;Polyommatus celina;Polyommatus celina;0.009;Polyommatus celina;0.99999999739714;  
KM459315;Lepidoptera;Polyommatus celina;Polyommatus celina;0.983;Polyommatus celina;0.99999999652459;  
KM459316;Lepidoptera;Polyommatus celina;Polyommatus celina;0.007;Polyommatus celina;0.99999999839019;  
KM459317;Lepidoptera;Polyommatus celina;NA;0.021;Polyommatus celina;0.99999999814662;  
KM459318;Lepidoptera;Polyommatus celina;Polyommatus celina;0.001;Polyommatus celina;0.9999999974969;  
KM459319;Lepidoptera;Polyommatus celina;Polyommatus celina;0.993;Polyommatus celina;0.99999999801673;  
KM459320;Lepidoptera;Polyommatus celina;Polyommatus celina;0.001;Polyommatus celina;0.9999999974969;  
KM459321;Lepidoptera;Polyommatus icarus;Polyommatus icarus;0.001;Polyommatus icarus;0.998856113719376;

[illegible]

KM459395;Lepidoptera;Polyommatus icarus;Polyommatus icarus;0.002;Polyommatus icarus;0.999653930279044;  
KM459396;Lepidoptera;Polyommatus icarus;Polyommatus icarus;0.001;Polyommatus icarus;0.999851522482238;  
KM459397;Lepidoptera;Polyommatus icarus;Polyommatus icarus;0.001;Polyommatus icarus;0.999851522482238;  
KM459399;Lepidoptera;Polyommatus icarus;Polyommatus icarus;0.001;Polyommatus icarus;0.999811574177771;  
KM459401;Lepidoptera;Polyommatus icarus;Polyommatus icarus;0.001;Polyommatus icarus;0.999851522482238;  
KM459402;Lepidoptera;Polyommatus icarus;Polyommatus icarus;0.001;Polyommatus icarus;0.999851522482238;  
KM459403;Lepidoptera;Polyommatus icarus;Polyommatus icarus;0.001;Polyommatus icarus;0.999851522482238;  
KM459404;Lepidoptera;Polyommatus icarus;Polyommatus icarus;0.001;Polyommatus icarus;0.999851522482238;  
KM459405;Lepidoptera;Polyommatus icarus;Polyommatus icarus;0.001;Polyommatus icarus;0.999851522482238;  
KM459406;Lepidoptera;Polyommatus icarus;Polyommatus icarus;0.001;Polyommatus icarus;0.999851522482238;  
KM459408;Lepidoptera;Polyommatus icarus;NA;0.003;Polyommatus icarus;0.998348220031726;  
KM459409;Lepidoptera;Polyommatus icarus;Polyommatus icarus;1;Polyommatus icarus;0.988670826309563;  
KM459410;Lepidoptera;Polyommatus icarus;Polyommatus icarus;1;Polyommatus icarus;0.988670826309563;  
KM459411;Lepidoptera;Polyommatus icarus;Polyommatus icarus;1;Polyommatus icarus;0.988670826309563;  
KM459412;Lepidoptera;Polyommatus icarus;Polyommatus icarus;1;Polyommatus icarus;0.988670826309563;  
KM459413;Lepidoptera;Polyommatus icarus;Polyommatus icarus;1;Polyommatus icarus;0.988670826309563;  
KM459414;Lepidoptera;Polyommatus icarus;NA;0.001;NA;0.999994270558956;  
KM459415;Lepidoptera;Polyommatus icarus;Polyommatus icarus;0.001;Polyommatus icarus;0.999851522482238;  
KM459416;Lepidoptera;Polyommatus icarus;Polyommatus icarus;0.001;Polyommatus icarus;0.999851522482238;  
KM459418;Lepidoptera;Polyommatus icarus;Polyommatus icarus;0.001;Polyommatus icarus;0.999851522482238;  
KM459419;Lepidoptera;Polyommatus icarus;Polyommatus icarus;0.001;Polyommatus icarus;0.999851522482238;  
KM459420;Lepidoptera;Polyommatus icarus;Polyommatus icarus;0.001;Polyommatus icarus;0.999851522482238;  
KM459421;Lepidoptera;Polyommatus icarus;Polyommatus icarus;0.001;Polyommatus icarus;0.999851522482238;  
KM459422;Lepidoptera;Polyommatus icarus;NA;0.13;Polyommatus icarus;0.979762695748748;  
KM459423;Lepidoptera;Polyommatus icarus;Polyommatus icarus;0.001;Polyommatus icarus;0.999860626666977;  
KM459424;Lepidoptera;Polyommatus icarus;Polyommatus icarus;0.995;Polyommatus icarus;0.999841416213754;  
KM459425;Lepidoptera;Polyommatus icarus;Polyommatus icarus;0.001;Polyommatus icarus;0.999851522482238;  
KM459426;Lepidoptera;Polyommatus icarus;Polyommatus icarus;0.001;Polyommatus icarus;0.999851522482238;  
KM459427;Lepidoptera;Polyommatus icarus;NA;0.003;Polyommatus icarus;0.998348220031726;  
KM459428;Lepidoptera;Polyommatus icarus;NA;0.004;Polyommatus icarus;0.999481683747521;  
KM459429;Lepidoptera;Polyommatus icarus;Polyommatus icarus;0.001;Polyommatus icarus;0.999851522482238;  
KM459431;Lepidoptera;Polyommatus icarus;Polyommatus icarus;0.001;Polyommatus icarus;0.999765839960799;  
KM459432;Lepidoptera;Polyommatus icarus;Polyommatus icarus;0.001;Polyommatus icarus;0.999851522482238;  
KM459433;Lepidoptera;Polyommatus icarus;Polyommatus icarus;0.001;Polyommatus icarus;0.999851522482238;  
KM459435;Lepidoptera;Polyommatus icarus;Polyommatus icarus;0.001;Polyommatus icarus;0.999851522482238;  
KM459438;Lepidoptera;Polyommatus icarus;Polyommatus icarus;0.998;Polyommatus icarus;0.999597220201636;  
KM459439;Lepidoptera;Polyommatus icarus;Polyommatus icarus;0.993;Polyommatus icarus;0.999862835392831;  
KM517249;Lepidoptera;Phengaris arion;NA;0.019;NA;0.873942246502214;  
KM517284;Lepidoptera;Phengaris teleius;NA;0.491;NA;0.854630020337126;  
KM517286;Lepidoptera;Phengaris teleius;NA;0.491;NA;0.854630020337126;  
KM517287;Lepidoptera;Phengaris teleius;Phengaris teleius;1;NA;0.854794865866951;  
KM517288;Lepidoptera;Phengaris teleius;NA;0.491;NA;0.858264794752326;  
KM517289;Lepidoptera;Phengaris teleius;Phengaris teleius;1;NA;0.850887794441426;  
KM517290;Lepidoptera;Phengaris teleius;NA;0.491;NA;0.857245891064942;  
KM517291;Lepidoptera;Phengaris teleius;NA;0.491;NA;0.854630020337126;  
KM517292;Lepidoptera;Phengaris teleius;NA;0.491;NA;0.854630020337126;

KM517293;Lepidoptera;Phengaris teleius;NA;0.491;NA;0.854460238073035;  
KM517294;Lepidoptera;Phengaris teleius;NA;0.491;NA;0.857245891064942;  
KM517295;Lepidoptera;Phengaris teleius;NA;0.491;NA;0.854630020337126;  
KM517296;Lepidoptera;Phengaris teleius;NA;0.491;NA;0.855949517859573;  
KM517297;Lepidoptera;Phengaris teleius;NA;0.491;NA;0.854630020337126;  
KM517329;Lepidoptera;Phengaris teleius;Phengaris teleius;0.012;Phengaris  
teleius;0.938293075893268;  
KM517330;Lepidoptera;Phengaris teleius;NA;0.493;Phengaris teleius;0.926779528630756;  
KM517331;Lepidoptera;Phengaris teleius;NA;0.493;Phengaris teleius;0.926779528630756;  
KM517835;Lepidoptera;Aricia agestis;Aricia agestis;1;Aricia agestis;0.979315827401608;  
KM517836;Lepidoptera;Aricia agestis;Aricia agestis;1;Aricia agestis;0.978996764450968;  
KM517838;Lepidoptera;Aricia agestis;Aricia agestis;1;Aricia agestis;0.979315827401608;  
KM517839;Lepidoptera;Aricia agestis;Aricia agestis;1;Aricia agestis;0.979315827401608;  
KM517841;Lepidoptera;Aricia agestis;NA;NA;Aricia agestis;0.993980512246517;  
KM517842;Lepidoptera;Aricia agestis;Aricia agestis;1;Aricia agestis;0.988437755993415;  
KM517846;Lepidoptera;Aricia agestis;Aricia agestis;1;Aricia agestis;0.979315827401608;  
KM517847;Lepidoptera;Aricia agestis;Aricia agestis;1;Aricia agestis;0.979315827401608;  
KM517848;Lepidoptera;Aricia cramera;Aricia cramera;1;Aricia cramera;0.999993153527516;  
KM517849;Lepidoptera;Polyommatus celina;NA;0.072;Polyommatus celina;0.99999999953559;  
KM517850;Lepidoptera;Aricia cramera;Aricia cramera;1;Aricia cramera;0.999992327687311;  
KM517853;Lepidoptera;Aricia cramera;Aricia cramera;1;Aricia cramera;0.999993731037033;  
KM517854;Lepidoptera;Aricia cramera;Aricia cramera;1;Aricia cramera;0.999993731037033;  
KM517855;Lepidoptera;Aricia cramera;Aricia cramera;1;Aricia cramera;0.999991524313082;  
KM517859;Lepidoptera;Polyommatus icarus;NA;0.001;Polyommatus icarus;0.999367894299281;  
KM517860;Lepidoptera;Aricia cramera;Aricia cramera;1;Aricia cramera;0.999993731037033;  
KM517861;Lepidoptera;Polyommatus celina;Polyommatus celina;0.002;Polyommatus  
celina;0.999999999641517;  
KM517863;Lepidoptera;Aricia cramera;Aricia cramera;1;Aricia cramera;0.999993731037033;  
KM517864;Lepidoptera;Polyommatus celina;Polyommatus celina;0.009;Polyommatus  
celina;0.99999999949694;  
KM571976;Lepidoptera;Aricia artaxerxes;Plebejus argus;1;Aricia artaxerxes;0.999743187199922;  
KM571986;Lepidoptera;Aglaia urticae;NA;0.002;Aglaia urticae;0.987497593219019;  
KM572099;Lepidoptera;Lycaena phlaeas;Lycaena phlaeas;1;Lycaena phlaeas;0.99999986385689;  
KM572133;Lepidoptera;Lasiommata maera;Lasiommata maera;1;Lasiommata maera;0.999995617120616;  
KM572165;Lepidoptera;Aricia eumedon;Eumedonia eumedon;0.002;Eumedonia eumedon;0.997434540282035;  
KM572201;Lepidoptera;Nymphalis c-album;NA;0.076;NA;0.999999389450531;  
KM572268;Lepidoptera;Pyrgus alveus;NA;0.003;NA;0.99999999997732;  
KM572272;Lepidoptera;Aricia artaxerxes;Plebejus argus;1;Aricia artaxerxes;0.999743187199922;  
KM572320;Lepidoptera;Aricia artaxerxes;Plebejus argus;1;Aricia artaxerxes;0.999743187199922;  
KM572347;Lepidoptera;Fabriciana niobe;NA;0.001;Fabriciana niobe;0.989214650993052;  
KM572370;Lepidoptera;Gonepteryx rhamni;NA;0.474;Gonepteryx rhamni;0.982076396127858;  
KM572382;Lepidoptera;Colias palaeno;NA;0.002;NA;0.999999999983681;  
KM572384;Lepidoptera;Brenthis ino;Brenthis ino;1;Brenthis ino;0.999238356896675;  
KM572430;Lepidoptera;Colias hyale;Colias hyale;0.015;Colias hyale;0.999997884296128;  
KM572441;Lepidoptera;Boloria euphrosyne;Boloria euphrosyne;0.001;Boloria  
euphrosyne;0.999985640170951;  
KM572512;Lepidoptera;Pyrgus malvae;Pyrgus malvae;NA;Pyrgus malvae;0.980121140374433;  
KM572513;Lepidoptera;Aricia artaxerxes;Plebejus argus;1;Aricia artaxerxes;0.999743187199922;  
KM572519;Lepidoptera;Anthocharis cardamines;Anthocharis cardamines;1;Anthocharis  
cardamines;0.999999904052946;  
KM572538;Lepidoptera;Colias palaeno;NA;0.002;NA;0.999999999983681;  
KM572581;Lepidoptera;Lycaena hippothoe;NA;NA;Lycaena hippothoe;0.928973453460131;  
KM572599;Lepidoptera;Plebejus idas;NA;0.007;NA;0.999546324331549;  
KM572712;Lepidoptera;Melitaea diamina;NA;0.149;Melitaea diamina;0.999999996592464;  
KM572728;Lepidoptera;Ochlodes sylvanus;NA;0.325;Ochlodes sylvanus;0.995935281765954;  
KM572761;Lepidoptera;Pyrgus malvae;Pyrgus malvae;NA;Pyrgus malvae;0.980121140374433;  
KM572766;Lepidoptera;Apatura iris;Apatura iris;1;Apatura iris;0.99999999999972;  
KM572775;Lepidoptera;Callophrys rubi;NA;0.003;Callophrys rubi;0.997328639918919;  
KM572807;Lepidoptera;Aphantopus hyperantus;Aphantopus hyperantus;0.002;Aphantopus  
hyperantus;0.999999556235408;  
KM572834;Lepidoptera;Coenonympha pamphilus;Coenonympha pamphilus;1;Coenonympha  
pamphilus;0.99999999999744;  
KM572903;Lepidoptera;Argynnis aglaja;NA;NA;Speyeria aglaja;0.872991147917853;  
KM572979;Lepidoptera;Pararge aegeria;Pararge aegeria;1;Pararge aegeria;0.999999999963165;  
KM573008;Lepidoptera;Cyaniris semiargus;NA;NA;Cyaniris semiargus;0.999051841766953;  
KM573033;Lepidoptera;Aricia artaxerxes;Plebejus argus;1;Aricia artaxerxes;0.999743187199922;  
KM573077;Lepidoptera;Lycaena hippothoe;NA;NA;Lycaena hippothoe;0.96171722036274;  
KM573204;Lepidoptera;Aphantopus hyperantus;Aphantopus hyperantus;0.001;Aphantopus  
hyperantus;0.999990984082303;  
KM573218;Lepidoptera;Aporia crataegi;NA;0.008;Aporia crataegi;0.999995700720296;  
KM573234;Lepidoptera;Apatura ilia;NA;0.165;Apatura ilia;0.956796812031481;  
KM573246;Lepidoptera;Carterocephalus palaemon;NA;0.052;Carterocephalus  
palaemon;0.728445051795325;  
KM573281;Lepidoptera;Glaucopsyche alexis;NA;NA;Glaucopsyche alexis;0.979381169624069;  
KM573316;Lepidoptera;Cyaniris semiargus;NA;NA;Cyaniris semiargus;0.999299367533383;  
KM573324;Lepidoptera;Aricia artaxerxes;Plebejus argus;1;Aricia artaxerxes;0.999743187199922;  
KM573345;Lepidoptera;Pararge aegeria;Pararge aegeria;1;Pararge aegeria;0.999999999963165;

KM573383;Lepidoptera;Thymelicus lineola;Thymelicus lineola;1;Thymelicus lineola;0.999995927238524;  
KM573397;Lepidoptera;Coenonympha glycerion;NA;0.162;Coenonympha glycerion;0.999998620111782;  
KM573493;Lepidoptera;Plebejus argus;NA;0.036;Plebejus argus;0.988160277018267;  
KM573513;Lepidoptera;Aricia artaxerxes;Plebejus argus;1;Aricia artaxerxes;0.999743187199922;  
KM573527;Lepidoptera;Pyrgus andromedae;Pyrgus andromedae;0.001;Pyrgus andromedae;0.998828669843251;  
KM573528;Lepidoptera;Aricia eumedon;Eumedonia eumedon;0.002;Eumedonia eumedon;0.997434540282035;  
KM573540;Lepidoptera;Erebia pandrose;Erebia pandrose;0.003;Erebia pandrose;0.993608645577247;  
KM573555;Lepidoptera;Lycaena virgaureae;NA;0.133;Lycaena virgaureae;0.999273473352577;  
KM573575;Lepidoptera;Thymelicus lineola;Thymelicus lineola;1;Thymelicus lineola;0.999962055342616;  
KM573621;Lepidoptera;Vanessa atalanta;Vanessa atalanta;1;Vanessa atalanta;0.99999999757762;  
KM573649;Lepidoptera;Parnassius mnemosyne;Parnassius mnemosyne;1;Parnassius mnemosyne;0.99999584180132;  
KM573651;Lepidoptera;Cupido minimus;NA;0.006;Cupido minimus;0.999768371759258;  
KM573699;Lepidoptera;Aricia artaxerxes;Plebejus argus;1;Aricia artaxerxes;0.999743187199922;  
KM573714;Lepidoptera;Fabriciana adippe;NA;NA;Fabriciana adippe;0.900255826442102;  
KM573716;Lepidoptera;Celastrina argiolus;Celastrina argiolus;1;Celastrina argiolus;0.999527385150531;  
KM592969;Lepidoptera;Aphantopus hyperantus;Aphantopus hyperantus;0.999;NA;0.868572173240311;  
KM972602;Lepidoptera;Lysandra coridon gennargentii;NA;NA;NA;0.992233859749513;  
KM972603;Lepidoptera;Lysandra coridon nufrellensis;Lysandra coridon;0.001;Lysandra coridon;0.874063524667043;  
KM972605;Lepidoptera;Lysandra hispana;NA;NA;NA;0.957190060882237;  
KM972606;Lepidoptera;Lysandra coridon;Lysandra coridon;NA;NA;0.995479627820194;  
KM972607;Lepidoptera;Lysandra coridon;Lysandra coridon;NA;Lysandra coridon;0.801648170307457;  
KM972609;Lepidoptera;Lysandra hispana;NA;NA;NA;0.997938263226617;  
KM972611;Lepidoptera;Lysandra hispana;NA;NA;NA;0.930118546253334;  
KM972612;Lepidoptera;Lysandra hispana;NA;NA;NA;0.909098462050209;  
KM972615;Lepidoptera;Lysandra coridon;Lysandra coridon;NA;NA;0.953008903890644;  
KM972617;Lepidoptera;Lysandra coridon;NA;NA;Lysandra coridon;0.811340269227995;  
KM972618;Lepidoptera;Lysandra coridon;NA;NA;NA;0.966495575681232;  
KM972632;Lepidoptera;Lysandra coridon gennargentii;NA;NA;Lysandra caelestissimus;0.746618874262524;  
KP032261;Lepidoptera;Maniola nurag;NA;NA;NA;0.999999999969646;  
KP032262;Lepidoptera;Maniola nurag;NA;NA;Maniola jurtina;0.91247810881561;  
KP032263;Lepidoptera;Maniola nurag;NA;NA;NA;0.999999999969646;  
KP032264;Lepidoptera;Maniola nurag;NA;NA;NA;0.999999999969646;  
KP032265;Lepidoptera;Maniola nurag;Maniola nurag;1;Maniola nurag;0.944268434745869;  
KP032266;Lepidoptera;Maniola nurag;Maniola nurag;0.999;Maniola nurag;0.944634067496311;  
KP032268;Lepidoptera;Maniola nurag;Maniola nurag;1;Maniola nurag;0.975702243612751;  
KP032280;Lepidoptera;Maniola nurag;NA;0.002;Maniola jurtina;0.930521714939346;  
KP032281;Lepidoptera;Maniola nurag;NA;NA;Maniola nurag;0.735088611024579;  
KP032282;Lepidoptera;Maniola nurag;NA;0.007;NA;0.99999999998573;  
KP032283;Lepidoptera;Maniola nurag;NA;NA;Maniola nurag;0.984865455196247;  
KP032284;Lepidoptera;Maniola nurag;Maniola nurag;0.995;Maniola nurag;0.998920097011014;  
KP032285;Lepidoptera;Maniola nurag;NA;NA;Maniola nurag;0.963281872445319;  
KP032287;Lepidoptera;Maniola nurag;NA;0.001;NA;0.999999999994698;  
KP032288;Lepidoptera;Maniola nurag;NA;NA;Maniola nurag;0.963281872445319;  
KP032298;Lepidoptera;Maniola jurtina;NA;0.003;NA;0.99999999997295;  
KP032299;Lepidoptera;Maniola jurtina;NA;0.007;NA;0.99999999998573;  
KP032300;Lepidoptera;Maniola jurtina;NA;0.014;NA;0.99999999999311;  
KP032316;Lepidoptera;Maniola nurag;NA;0.002;Maniola jurtina;0.930521714939346;  
KP032317;Lepidoptera;Maniola jurtina;NA;0.002;Maniola jurtina;0.930521714939346;  
KP032346;Lepidoptera;Maniola cecilia;Pyronia cecilia;1;Pyronia cecilia;1;  
KP032347;Lepidoptera;Maniola cecilia;Pyronia cecilia;1;Pyronia cecilia;1;  
KP032352;Lepidoptera;Maniola nurag;NA;0.002;Maniola jurtina;0.930521714939346;  
KP032353;Lepidoptera;Maniola nurag;Maniola nurag;0.999;Maniola nurag;0.944634067496311;  
KP032355;Lepidoptera;Maniola nurag;Maniola nurag;1;Maniola nurag;0.975702243612751;  
KP052710;Lepidoptera;Aricia agestis;NA;NA;Aricia agestis;0.993844765181105;  
KP253125;Lepidoptera;Pyrgus malvoides;NA;0.176;Pyrgus malvoides;0.940490890379026;  
KP253136;Lepidoptera;Polyommatus thersites;Polyommatus thersites;0.005;Polyommatus thersites;0.999999807789199;  
KP253157;Lepidoptera;Erebia pharte;Erebia pharte;1;Erebia pharte;0.99999999630495;  
KP253167;Lepidoptera;Erebia melampus;Erebia melampus;NA;Erebia melampus;0.950990028966024;  
KP253180;Lepidoptera;Melitaea didyma;Melitaea didyma;0.001;Melitaea didyma;0.988955981346734;  
KP253190;Lepidoptera;Erebia oeme;NA;0.114;Erebia oeme;0.99999999830635;  
KP253200;Lepidoptera;Boloria pales;Boloria pales;0.998;Boloria pales;0.996520205418986;  
KP253207;Lepidoptera;Pyrgus serratulae;Pyrgus serratulae;1;Pyrgus serratulae;0.9999989567508;  
KP253223;Lepidoptera;Coenonympha gardetta;NA;0.003;Coenonympha gardetta;0.773402540734451;  
KP253248;Lepidoptera;Lycaena tityrus;Lycaena tityrus;1;Lycaena tityrus;0.999998928238034;  
KP253255;Lepidoptera;Minois dryas;NA;0.025;Minois dryas;0.850746026247397;  
KP253256;Lepidoptera;Erebia epiphron;NA;NA;Erebia epiphron;0.994401488812176;  
KP253261;Lepidoptera;Colias crocea;NA;0.059;NA;0.99999999999738;  
KP253264;Lepidoptera;Colias alfacariensis;Colias alfacariensis;0.001;Colias alfacariensis;0.999926026317526;  
KP253275;Lepidoptera;Agriades optilete;Agriades optilete;1;Agriades optilete;0.999999983195778;

KP253281;Lepidoptera;Erebia tyndarus;NA;NA;NA;0.999999999999923;  
KP253294;Lepidoptera;Erebia pluto;Erebia pluto;1;Erebia pluto;0.999999977588772;  
KP253307;Lepidoptera;Euphydryas intermedia;NA;0.121;NA;0.999999999995334;  
KP253333;Lepidoptera;Carcharodus alceae;NA;NA;Carcharodus tripolinus;0.998261082574014;  
KP253349;Lepidoptera;Erebia montana;Erebia montana;1;Erebia montana;0.999034068085633;  
KP253354;Lepidoptera;Erebia oeme;NA;0.114;Erebia oeme;0.999999999830635;  
KP253361;Lepidoptera;Erebia medusa;NA;0.018;Erebia medusa;0.988349516821371;  
KP253373;Lepidoptera;Erebia manto;Erebia manto;0.999;Erebia manto;0.999976956795746;  
KP253383;Lepidoptera;Colias phicomone;NA;0.001;Colias phicomone;0.985598879697681;  
KP253384;Lepidoptera;Euphydryas cynthia;Euphydryas cynthia;1;Euphydryas  
cynthia;0.999999243242402;  
KP253390;Lepidoptera;Erebia montana;Erebia montana;1;Erebia montana;0.99905080170195;  
KP253393;Lepidoptera;Erebia euryale;NA;NA;Erebia euryale;0.919518760623792;  
KP253411;Lepidoptera;Erynnis tages;Erynnis tages;1;Erynnis tages;0.999999281987018;  
KP253465;Lepidoptera;Erebia pronoe;Erebia pronoe;1;Erebia pronoe;0.999567958198288;  
KP253469;Lepidoptera;Colias alfacariensis;Colias alfacariensis;0.001;Colias  
alfacariensis;0.999926026317526;  
KP253472;Lepidoptera;Erebia montana;Erebia montana;1;Erebia montana;0.99905080170195;  
KP253476;Lepidoptera;Aricia eumedon;Eumedonia eumedon;0.007;Eumedonia eumedon;0.996933802230206;  
KP253480;Lepidoptera;Lasiommata megera;Lasiommata megera;1;Lasiommata megera;0.999798408437094;  
KP253487;Lepidoptera;Lysandra coridon;NA;NA;NA;0.997949615104622;  
KP253494;Lepidoptera;Thymelicus sylvestris;Thymelicus sylvestris;1;Thymelicus  
sylvestris;0.999999981568351;  
KP253515;Lepidoptera;Polyommatus thersites;Polyommatus thersites;0.005;Polyommatus  
thersites;0.99999807789199;  
KP253531;Lepidoptera;Phengaris arion;NA;0.054;Phengaris arion;0.938397095316026;  
KP253543;Lepidoptera;Pyrgus cacaliae;Pyrgus cacaliae;1;Pyrgus cacaliae;0.998243937509632;  
KP253572;Lepidoptera;Satyrium w-album;NA;0.056;Satyrium w-album;0.989378230996316;  
KP253586;Lepidoptera;Lycaena tityrus;Lycaena tityrus;1;Lycaena tityrus;0.999997027007808;  
KP253591;Lepidoptera;Erebia meolans;NA;NA;Erebia meolans;0.999558897580846;  
KP253597;Lepidoptera;Limenitis camilla;Limenitis camilla;0.009;Limenitis  
camilla;0.9999828626808;  
KP253616;Lepidoptera;Erebia melampus;Erebia melampus;NA;Erebia melampus;0.950990028966024;  
KP253641;Lepidoptera;Thecla betulae;Thecla betulae;1;Thecla betulae;0.99999999972886;  
KP253700;Lepidoptera;Erebia eriphyle;Erebia eriphyle;1;Erebia eriphyle;0.99999983979336;  
KP253710;Lepidoptera;Erebia pronoe;Erebia pronoe;1;Erebia pronoe;0.999567958198288;  
KP253740;Lepidoptera;Hamearis lucina;NA;NA;Hamearis lucina;0.99999999984141;  
KP253746;Lepidoptera;Oeneis glacialis;NA;NA;Oeneis glacialis;0.858599451249677;  
KP689268;Lepidoptera;Euphydryas aurinia;NA;0.087;Euphydryas aurinia;0.771256060199022;  
KP689269;Lepidoptera;Euphydryas aurinia;NA;0.087;Euphydryas aurinia;0.771256060199022;  
KP689275;Lepidoptera;Euphydryas aurinia;NA;0.001;Euphydryas aurinia;0.827324190002093;  
KP689276;Lepidoptera;Euphydryas aurinia;NA;0.001;Euphydryas aurinia;0.827324190002093;  
KP689294;Lepidoptera;Euphydryas aurinia;NA;0.218;Euphydryas merope;0.770676462833303;  
KP689295;Lepidoptera;Euphydryas aurinia;NA;0.218;Euphydryas merope;0.770676462833303;  
KP689296;Lepidoptera;Euphydryas aurinia;NA;0.218;Euphydryas merope;0.770676462833303;  
KP689297;Lepidoptera;Euphydryas aurinia;NA;0.218;Euphydryas merope;0.770676462833303;  
KP851156;Lepidoptera;Iphiclides podalirius;NA;0.313;Iphiclides podalirius;0.889198863100098;  
KP851157;Lepidoptera;Iphiclides podalirius;NA;0.313;Iphiclides podalirius;0.9030679504823;  
KP851159;Lepidoptera;Iphiclides podalirius;NA;0.302;Iphiclides podalirius;0.931082412606632;  
KP851160;Lepidoptera;Iphiclides podalirius;NA;0.302;Iphiclides podalirius;0.931082412606632;  
KP851162;Lepidoptera;Iphiclides podalirius;NA;0.313;Iphiclides podalirius;0.889198863100098;  
KP870212;Lepidoptera;Coenonympha dorus;Coenonympha dorus;1;Coenonympha dorus;0.999999999915957;  
KP870213;Lepidoptera;Hamearis lucina;NA;NA;Hamearis lucina;0.99999999984141;  
KP870214;Lepidoptera;Lycaena phlaeas;Lycaena phlaeas;1;Lycaena phlaeas;0.999999996363186;  
KP870216;Lepidoptera;Coenonympha pamphilus;Coenonympha pamphilus;1;Coenonympha  
pamphilus;0.999999999999744;  
KP870217;Lepidoptera;Araschnia levana;Araschnia levana;1;Araschnia levana;0.9999980307634;  
KP870218;Lepidoptera;Thymelicus acteon;Thymelicus acteon;1;Thymelicus acteon;0.99999999752248;  
KP870219;Lepidoptera;Pyrgus foulquieri;Pyrgus foulquieri;0.005;Pyrgus  
foulquieri;0.741885925757585;  
KP870220;Lepidoptera;Carcharodus baeticus;Carcharodus baeticus;0.004;Carcharodus  
baeticus;0.999229183442549;  
KP870221;Lepidoptera;Argynnis aglaja;NA;NA;Speyeria aglaja;0.889159762971514;  
KP870223;Lepidoptera;Carcharodus lavatherae;Carcharodus lavatherae;1;Carcharodus  
lavatherae;0.999975293871709;  
KP870225;Lepidoptera;Satyrium pruni;NA;0.076;Satyrium pruni;0.990322364021655;  
KP870226;Lepidoptera;Carcharodus alceae;Carcharodus alceae;0.998;Carcharodus  
alceae;0.999999994860701;  
KP870227;Lepidoptera;Thymelicus acteon;Thymelicus acteon;1;Thymelicus acteon;0.99999999752248;  
KP870228;Lepidoptera;Lycaena phlaeas;Lycaena phlaeas;1;Lycaena phlaeas;0.999999996363186;  
KP870231;Lepidoptera;Plebejus argus;Plebejus argus;0.001;Plebejus argus;0.995411334945632;  
KP870232;Lepidoptera;Aricia eumedon;Eumedonia eumedon;0.034;Eumedonia eumedon;0.978796818650431;  
KP870233;Lepidoptera;Scolitantides orion;Scolitantides orion;1;Scolitantides  
orion;0.999999953757596;  
KP870234;Lepidoptera;Erebia meolans;Erebia meolans;NA;Erebia meolans;0.999771037232439;  
KP870235;Lepidoptera;Papilio machaon;Papilio machaon;0.003;Papilio machaon;0.997288237409893;  
KP870236;Lepidoptera;Araschnia levana;Araschnia levana;1;Araschnia levana;0.999999772187832;  
KP870238;Lepidoptera;Brenthis daphne;Brenthis daphne;0.001;Brenthis daphne;0.996233668169668;



KP870240;Lepidoptera;Gegenes pumilio;Gegenes pumilio;1;Gegenes pumilio;0.999986726679266;  
KP870241;Lepidoptera;Boloria euphrosyne;Boloria euphrosyne;0.001;Boloria  
euphrosyne;0.999975174156152;  
KP870242;Lepidoptera;Argynnis aglaja;NA;0.003;Speyeria aglaja;0.829040804758583;  
KP870245;Lepidoptera;Thymelicus sylvestris;Thymelicus sylvestris;1;Thymelicus  
sylvestris;0.99999985935205;  
KP870247;Lepidoptera;Carcharodus lavatherae;Carcharodus lavatherae;1;Carcharodus  
lavatherae;0.999938147857335;  
KP870248;Lepidoptera;Maniola tithonus;Pyronia tithonus;NA;Pyronia tithonus;1;  
KP870249;Lepidoptera;Araschnia levana;Araschnia levana;1;Araschnia levana;0.999999751605545;  
KP870251;Lepidoptera;Carcharodus lavatherae;Carcharodus lavatherae;1;Carcharodus  
lavatherae;0.999984716552214;  
KP870252;Lepidoptera;Lycaena phlaeas;Lycaena phlaeas;1;Lycaena phlaeas;0.999999996363186;  
KP870253;Lepidoptera;Gonepteryx rhamni;NA;0.194;Gonepteryx rhamni;0.985761968681459;  
KP870254;Lepidoptera;Thymelicus sylvestris;NA;0.324;Thymelicus sylvestris;0.999940778442454;  
KP870255;Lepidoptera;Anthocharis cardamines;Anthocharis cardamines;1;Anthocharis  
cardamines;0.99999988995796;  
KP870257;Lepidoptera;Pyrgus alveus;NA;NA;Pyrgus alveus;0.931326683565012;  
KP870258;Lepidoptera;Hipparchia fagi;Hipparchia fagi;NA;Hipparchia fagi;0.986566456150817;  
KP870259;Lepidoptera;Callophrys rubi;NA;0.014;Callophrys rubi;0.998620746648187;  
KP870260;Lepidoptera;Boloria pales;Boloria pales;1;Boloria pales;0.998536542463107;  
KP870262;Lepidoptera;Brenthis daphne;Brenthis daphne;1;Brenthis daphne;0.997172799742872;  
KP870263;Lepidoptera;Fabriciana niobe;NA;0.012;Fabriciana niobe;0.984414140592274;  
KP870264;Lepidoptera;Lampides boeticus;Lampides boeticus;1;Lampides boeticus;0.99999999545906;  
KP870265;Lepidoptera;Hipparchia statilinus;Hipparchia statilinus;1;Hipparchia  
statilinus;0.999999999999005;  
KP870266;Lepidoptera;Fabriciana niobe;NA;0.007;Fabriciana niobe;0.984280831332444;  
KP870267;Lepidoptera;Pyrgus alveus;NA;0.002;Pyrgus alveus;0.952935075824246;  
KP870268;Lepidoptera;Cupido osiris;Cupido osiris;1;Cupido osiris;0.999999170120762;  
KP870269;Lepidoptera;Araschnia levana;Araschnia levana;1;Araschnia levana;0.999999774674759;  
KP870270;Lepidoptera;Celastrina argiolus;Celastrina argiolus;1;Celastrina  
argiolus;0.999527385150531;  
KP870271;Lepidoptera;Satyrium spini;Satyrium spini;1;Satyrium spini;0.999997733330997;  
KP870273;Lepidoptera;Papilio machaon;Papilio machaon;0.003;Papilio machaon;0.997288237409893;  
KP870274;Lepidoptera;Lycaena virgaureae;NA;0.184;Lycaena virgaureae;0.999653824584039;  
KP870275;Lepidoptera;Satyrium spini;Satyrium spini;1;Satyrium spini;0.999987432167351;  
KP870277;Lepidoptera;Hipparchia hermione;Hipparchia hermione;1;Hipparchia  
hermione;0.999958720745028;  
KP870282;Lepidoptera;Charaxes jasius;Charaxes jasius;NA;Charaxes jasius;0.990397821479112;  
KP870283;Lepidoptera;Pyrgus cacaliae;Pyrgus cacaliae;0.999;Pyrgus cacaliae;0.997229839348598;  
KP870284;Lepidoptera;Colias phicomone;Colias phicomone;0.001;Colias phicomone;0.986802434025645;  
KP870286;Lepidoptera;Pieris napi;NA;0.028;Pieris napi;0.888205720664699;  
KP870288;Lepidoptera;Gonepteryx cleopatra;Gonepteryx cleopatra;0.998;Gonepteryx  
cleopatra;0.999118636582266;  
KP870290;Lepidoptera;Coenonympha arcania;NA;0.153;Coenonympha arcania;0.966428236827255;  
KP870291;Lepidoptera;Aricia eumedon;Eumedonia eumedon;0.049;Eumedonia eumedon;0.980035355423569;  
KP870293;Lepidoptera;Minois dryas;NA;0.025;Minois dryas;0.850746026247397;  
KP870295;Lepidoptera;Aglaia urticae;NA;0.002;Aglaia urticae;0.987497593219019;  
KP870297;Lepidoptera;Thymelicus lineola;Thymelicus lineola;1;Thymelicus  
lineola;0.999995927238524;  
KP870298;Lepidoptera;Colias alfacariensis;Colias alfacariensis;0.001;Colias  
alfacariensis;0.999857790810452;  
KP870299;Lepidoptera;Apatura iris;Apatura iris;1;Apatura iris;0.999999999999972;  
KP870304;Lepidoptera;Lycaena phlaeas;Lycaena phlaeas;1;Lycaena phlaeas;0.999999996363186;  
KP870306;Lepidoptera;Cyaniris semiargus;NA;NA;Cyaniris semiargus;0.999065557065321;  
KP870307;Lepidoptera;Aphantopus hyperantus;Aphantopus hyperantus;0.003;Aphantopus  
hyperantus;0.999999455871523;  
KP870310;Lepidoptera;Polyommatus amandus;Polyommatus amandus;0.003;Polyommatus  
amandus;0.999951656678735;  
KP870311;Lepidoptera;Vanessa atalanta;Vanessa atalanta;1;Vanessa atalanta;0.999999999757762;  
KP870312;Lepidoptera;Issoria lathonia;Issoria lathonia;1;Issoria lathonia;0.99999999989257;  
KP870313;Lepidoptera;Satyrium acaciae;Satyrium acaciae;1;Satyrium acaciae;0.99999991343697;  
KP870315;Lepidoptera;Cupido minimus;NA;0.006;Cupido minimus;0.999768371759258;  
KP870316;Lepidoptera;Lasiommata maera;Lasiommata maera;1;Lasiommata maera;0.999998722471466;  
KP870317;Lepidoptera;Minois dryas;NA;0.025;Minois dryas;0.850746026247397;  
KP870318;Lepidoptera;Lasiommata maera;Lasiommata maera;1;Lasiommata maera;0.9999936429582;  
KP870319;Lepidoptera;Polyommatus thersites;Polyommatus thersites;0.999;Polyommatus  
thersites;0.999999916395897;  
KP870320;Lepidoptera;Thecla betulae;Thecla betulae;1;Thecla betulae;0.99999999972886;  
KP870324;Lepidoptera;Pyrgus foulquieri;Pyrgus foulquieri;0.005;Pyrgus  
foulquieri;0.741885925757585;  
KP870325;Lepidoptera;Cupido osiris;Cupido osiris;1;Cupido osiris;0.99999238096456;  
KP870326;Lepidoptera;Thymelicus acteon;Thymelicus acteon;1;Thymelicus acteon;0.9999999752248;  
KP870327;Lepidoptera;Satyrus ferula;Satyrus ferula;0.001;Satyrus ferula;0.993138467028266;  
KP870328;Lepidoptera;Coenonympha pamphilus;Coenonympha pamphilus;1;Coenonympha  
pamphilus;0.999999999999744;  
KP870329;Lepidoptera;Satyrium ilicis;Satyrium ilicis;1;Satyrium ilicis;0.999999987901305;  
KP870330;Lepidoptera;Brenthis ino;Brenthis ino;0.002;Brenthis ino;0.984749809551735;

KP870331;Lepidoptera;Pyrgus alveus;NA;NA;Pyrgus alveus;0.931326683565012;  
KP870334;Lepidoptera;Cupido minimus;NA;0.009;Cupido minimus;0.999791453712643;  
KP870337;Lepidoptera;Apatura iris;Apatura iris;1;Apatura iris;0.999999999999972;  
KP870339;Lepidoptera;Thymelicus lineola;Thymelicus lineola;1;Thymelicus  
lineola;0.999994567418986;  
KP870340;Lepidoptera;Minois dryas;NA;0.025;Minois dryas;0.850746026247397;  
KP870341;Lepidoptera;Erebia pandrose;Erebia pandrose;0.003;Erebia pandrose;0.993608645577247;  
KP870342;Lepidoptera;Glaucopsyche alexis;NA;NA;Glaucopsyche alexis;0.991019528246159;  
KP870344;Lepidoptera;Plebejus idas;NA;0.001;NA;0.999938863896795;  
KP870345;Lepidoptera;Pyrgus foulquieri;Pyrgus foulquieri;0.005;Pyrgus  
foulquieri;0.741885925757585;  
KP870349;Lepidoptera;Coenonympha pamphilus;Coenonympha pamphilus;1;Coenonympha  
pamphilus;0.999999999999744;  
KP870350;Lepidoptera;Gegenes pumilio;Gegenes pumilio;1;Gegenes pumilio;0.999986726679266;  
KP870352;Lepidoptera;Arethusana arethusana;Arethusana arethusana;0.045;Arethusana  
arethusana;0.999962297609568;  
KP870353;Lepidoptera;Maniola cecilia;Pyronia cecilia;1;Pyronia cecilia;1;  
KP870354;Lepidoptera;Chazara briseis;Chazara briseis;0.001;Chazara briseis;0.999962563201771;  
KP870355;Lepidoptera;Boloria pales;Boloria pales;1;Boloria pales;0.998536542463107;  
KP870356;Lepidoptera;Brenthis ino;Brenthis ino;0.998;Brenthis ino;0.995325118916732;  
KP870357;Lepidoptera;Brenthis daphne;Brenthis daphne;0.001;Brenthis daphne;0.996649664069688;  
KP870358;Lepidoptera;Thymelicus sylvestris;Thymelicus sylvestris;1;Thymelicus  
sylvestris;0.999999985935205;  
KP870359;Lepidoptera;Satyrium w-album;NA;0.185;Satyrium w-album;0.994665799693619;  
KP870360;Lepidoptera;Hipparchia hermione;Hipparchia hermione;1;Hipparchia  
hermione;0.999958624563657;  
KP870361;Lepidoptera;Gegenes nostrodamus;Gegenes nostrodamus;1;Gegenes  
nostrodamus;0.999999996883645;  
KP870363;Lepidoptera;Satyrium acaciae;Satyrium acaciae;1;Satyrium acaciae;0.99999991343697;  
KP870364;Lepidoptera;Satyrium acaciae;Satyrium acaciae;1;Satyrium acaciae;0.999999915972158;  
KP870366;Lepidoptera;Scolitantides orion;Scolitantides orion;1;Scolitantides  
orion;0.999999953757596;  
KP870368;Lepidoptera;Minois dryas;NA;0.025;Minois dryas;0.850746026247397;  
KP870371;Lepidoptera;Hipparchia hermione;NA;NA;NA;0.999999999999991;  
KP870373;Lepidoptera;Arethusana arethusana;Arethusana arethusana;0.023;Arethusana  
arethusana;0.999940049962276;  
KP870375;Lepidoptera;Brenthis ino;Brenthis ino;0.007;Brenthis ino;0.977157381961834;  
KP870376;Lepidoptera;Limenitis camilla;Limenitis camilla;0.003;Limenitis  
camilla;0.999815165838915;  
KP870377;Lepidoptera;Parnassius apollo;Parnassius apollo;1;Parnassius apollo;0.99641937826143;  
KP870379;Lepidoptera;Polyommatus daphnis;NA;0.06;Polyommatus daphnis;0.994947425490863;  
KP870380;Lepidoptera;Arethusana arethusana;Arethusana arethusana;1;Arethusana  
arethusana;0.999985516708968;  
KP870381;Lepidoptera;Coenonympha gardetta;NA;0.039;Coenonympha gardetta;0.768574698743531;  
KP870384;Lepidoptera;Satyrium spini;Satyrium spini;1;Satyrium spini;0.99998221707433;  
KP870385;Lepidoptera;Argynnis aglaja;NA;NA;NA;0.9999999999998776;  
KP870386;Lepidoptera;Gegenes nostrodamus;Gegenes nostrodamus;1;Gegenes  
nostrodamus;0.999999996883645;  
KP870387;Lepidoptera;Coenonympha arcania;NA;0.179;Coenonympha arcania;0.96703617676693;  
KP870388;Lepidoptera;Arethusana arethusana;NA;0.062;Arethusana arethusana;0.999962489703143;  
KP870389;Lepidoptera;Argynnis aglaja;NA;0.005;NA;0.9999999999994961;  
KP870392;Lepidoptera;Satyrium esculi;Satyrium esculi;1;Satyrium esculi;0.999999957367948;  
KP870393;Lepidoptera;Argynnis aglaja;NA;NA;NA;0.9999999999998776;  
KP870394;Lepidoptera;Callophrys rubi;NA;0.002;Callophrys rubi;0.999056774120503;  
KP870396;Lepidoptera;Satyrium spini;Satyrium spini;1;Satyrium spini;0.99997778937137;  
KP870397;Lepidoptera;Pyrgus alveus;NA;NA;Pyrgus alveus;0.931326683565012;  
KP870398;Lepidoptera;Maniola cecilia;Pyronia cecilia;1;Pyronia cecilia;1;  
KP870399;Lepidoptera;Pyrgus andromedae;Pyrgus andromedae;1;Pyrgus andromedae;0.997371767954981;  
KP870400;Lepidoptera;Boloria euphrosyne;Boloria euphrosyne;1;Boloria  
euphrosyne;0.999987528582416;  
KP870401;Lepidoptera;Lysandra coridon;NA;NA;NA;0.998202549747544;  
KP870404;Lepidoptera;Polyommatus thersites;Polyommatus thersites;0.999;Polyommatus  
thersites;0.9999985539095;  
KP870405;Lepidoptera;Pyrgus foulquieri;Pyrgus foulquieri;0.005;Pyrgus  
foulquieri;0.741885925757585;  
KP870406;Lepidoptera;Carterocephalus palaemon;NA;0.05;Carterocephalus  
palaemon;0.720518487271686;  
KP870407;Lepidoptera;Erebia manto;Erebia manto;0.003;Erebia manto;0.999947286129868;  
KP870408;Lepidoptera;Brenthis ino;Brenthis ino;0.001;Brenthis ino;0.998434780405276;  
KP870409;Lepidoptera;Nymphalis c-album;NA;0.215;NA;0.999999192918557;  
KP870411;Lepidoptera;Polyommatus daphnis;Polyommatus daphnis;0.007;Polyommatus  
daphnis;0.99569888179315;  
KP870414;Lepidoptera;Carcharodus alceae;Carcharodus alceae;0.999;Carcharodus  
alceae;0.999999996339511;  
KP870417;Lepidoptera;Aglais urticae;Aglais urticae;0.001;Aglais urticae;0.994396335177485;  
KP870419;Lepidoptera;Aglais urticae;Aglais urticae;0.999;Aglais urticae;0.996396169943103;  
KP870420;Lepidoptera;Minois dryas;NA;0.025;Minois dryas;0.850746026247397;  
KP870421;Lepidoptera;Lampides boeticus;Lampides boeticus;1;Lampides boeticus;0.99999999876789;

KP870422;Lepidoptera;Thecla betulae;Thecla betulae;1;Thecla betulae;0.99999999972886;  
KP870423;Lepidoptera;Arethusana arethusana;Arethusana arethusana;1;Arethusana  
arethusana;0.99999787144355;  
KP870424;Lepidoptera;Aglais urticae;NA;0.002;Aglais urticae;0.987497593219019;  
KP870428;Lepidoptera;Fabriciana niobe;NA;0.007;Fabriciana niobe;0.984627988609443;  
KP870429;Lepidoptera;Hipparchia fagi;Hipparchia fagi;NA;Hipparchia fagi;0.986566456150817;  
KP870430;Lepidoptera;Coenonympha pamphilus;Coenonympha pamphilus;1;Coenonympha  
pamphilus;0.9999999999744;  
KP870433;Lepidoptera;Polyommatus amandus;Polyommatus amandus;0.003;Polyommatus  
amandus;0.999951656678735;  
KP870435;Lepidoptera;Boloria pales;Boloria pales;1;Boloria pales;0.998536542463107;  
KP870436;Lepidoptera;Hipparchia hermione;Hipparchia hermione;1;Hipparchia  
hermione;0.999912393907121;  
KP870441;Lepidoptera;Pieris napi;NA;0.028;Pieris napi;0.888205720664699;  
KP870442;Lepidoptera;Cupido argiades;NA;0.49;Cupido argiades;0.727122840051529;  
KP870443;Lepidoptera;Minois dryas;NA;0.025;Minois dryas;0.850746026247397;  
KP870444;Lepidoptera;Hamearis lucina;NA;NA;Hamearis lucina;0.99999999984141;  
KP870445;Lepidoptera;Erebia epiphron;NA;NA;Erebia epiphron;0.994401488812176;  
KP870446;Lepidoptera;Cupido minimus;NA;0.009;Cupido minimus;0.999791453712643;  
KP870447;Lepidoptera;Maniola cecilia;Pyronia cecilia;1;Pyronia cecilia;1;  
KP870449;Lepidoptera;Pieris napi;NA;0.028;Pieris napi;0.888205720664699;  
KP870451;Lepidoptera;Thymelicus acteon;Thymelicus acteon;1;Thymelicus acteon;0.9999999752248;  
KP870453;Lepidoptera;Lysandra hispana;NA;NA;Lysandra hispana;0.906698563865667;  
KP870455;Lepidoptera;Scolitantides orion;Scolitantides orion;1;Scolitantides  
orion;0.999999953757596;  
KP870459;Lepidoptera;Pyrgus foulquieri;Pyrgus foulquieri;0.005;Pyrgus  
foulquieri;0.741885925757585;  
KP870460;Lepidoptera;Pyrgus cacaliae;Pyrgus cacaliae;0.999;Pyrgus cacaliae;0.997229839348598;  
KP870461;Lepidoptera;Lasiommata megera;Lasiommata megera;0.995;Lasiommata  
megera;0.999279716854958;  
KP870462;Lepidoptera;Coenonympha arcania;Coenonympha arcania;0.002;NA;0.99999999999943;  
KP870464;Lepidoptera;Thymelicus sylvestris;Thymelicus sylvestris;1;Thymelicus  
sylvestris;0.99999974418415;  
KP870465;Lepidoptera;Cupido osiris;Cupido osiris;1;Cupido osiris;0.999997440696525;  
KP870466;Lepidoptera;Boloria dia;Boloria dia;1;Boloria dia;0.99999999979764;  
KP870469;Lepidoptera;Vanessa cardui;Vanessa cardui;1;Vanessa cardui;0.999999459983318;  
KP870470;Lepidoptera;Thymelicus sylvestris;Thymelicus sylvestris;1;Thymelicus  
sylvestris;0.99999993098527;  
KP870471;Lepidoptera;Thymelicus acteon;Thymelicus acteon;1;Thymelicus acteon;0.99999962833841;  
KP870472;Lepidoptera;Pyrgus foulquieri;Pyrgus foulquieri;0.005;Pyrgus  
foulquieri;0.741885925757585;  
KP870473;Lepidoptera;Colias crocea;NA;0.059;NA;0.99999999999738;  
KP870476;Lepidoptera;Cupido osiris;Cupido osiris;1;Cupido osiris;0.99999238096456;  
KP870477;Lepidoptera;Melitaea diamina;NA;0.149;Melitaea diamina;0.99999996592464;  
KP870478;Lepidoptera;Apatura ilia;NA;0.165;Apatura ilia;0.956796812031481;  
KP870480;Lepidoptera;Colias crocea;NA;NA;NA;0.99999999999005;  
KP870482;Lepidoptera;Colias crocea;NA;0.059;NA;0.99999999999738;  
KP870483;Lepidoptera;Ochlodes sylvanus;NA;0.054;Ochlodes sylvanus;0.997764762465093;  
KP870484;Lepidoptera;Pyrgus cacaliae;Pyrgus cacaliae;1;Pyrgus cacaliae;0.996034079665744;  
KP870485;Lepidoptera;Hipparchia semele;NA;0.001;Hipparchia semele;0.831933308520053;  
KP870486;Lepidoptera;Satyrium esculi;Satyrium esculi;1;Satyrium esculi;0.999999973565906;  
KP870488;Lepidoptera;Satyrium ilicis;Satyrium ilicis;1;Satyrium ilicis;0.99999963901758;  
KP870490;Lepidoptera;Brintesia circe;Brintesia circe;1;Brintesia circe;0.99999951254154;  
KP870491;Lepidoptera;Lasiommata megera;Lasiommata megera;1;Lasiommata megera;0.999770424843767;  
KP870492;Lepidoptera;Lasiommata megera;Lasiommata megera;0.013;Lasiommata  
megera;0.999252637809699;  
KP870495;Lepidoptera;Limenitis camilla;Limenitis camilla;0.009;Limenitis  
camilla;0.9999828626808;  
KP870496;Lepidoptera;Satyrium w-album;NA;0.056;Satyrium w-album;0.989378230996316;  
KP870497;Lepidoptera;Aglais urticae;Aglais urticae;0.001;Aglais urticae;0.990690600684087;  
KP870498;Lepidoptera;Pararge aegeria;Pararge aegeria;1;Pararge aegeria;0.99999997297948;  
KP870500;Lepidoptera;Hipparchia semele;NA;0.001;Hipparchia semele;0.824269221281445;  
KP870503;Lepidoptera;Thecla betulae;Thecla betulae;1;Thecla betulae;0.9999999972886;  
KP870504;Lepidoptera;Brenthis ino;NA;0.054;Brenthis ino;0.812147075315208;  
KP870505;Lepidoptera;Hamearis lucina;Hamearis lucina;1;Hamearis lucina;0.99999999986215;  
KP870506;Lepidoptera;Melitaea cinxia;Melitaea cinxia;1;Melitaea cinxia;0.99999999999659;  
KP870507;Lepidoptera;Gegenes nostrodamus;Gegenes nostrodamus;1;Gegenes  
nostrodamus;0.99999996883645;  
KP870509;Lepidoptera;Thymelicus lineola;Thymelicus lineola;1;Thymelicus  
lineola;0.999997716763366;  
KP870510;Lepidoptera;Brenthis ino;Brenthis ino;0.004;Brenthis ino;0.977399410491198;  
KP870511;Lepidoptera;Helleia helle;Lycaena helle;1;Lycaena helle;0.99999995066105;  
KP870512;Lepidoptera;Thymelicus acteon;Thymelicus acteon;1;Thymelicus acteon;0.99999899039215;  
KP870516;Lepidoptera;Plebejus argus;NA;NA;Plebejus argus;0.969283117748927;  
KP870518;Lepidoptera;Aphantopus hyperantus;Aphantopus hyperantus;0.009;Aphantopus  
hyperantus;0.999523934516809;  
KP870519;Lepidoptera;Chazara briseis;Chazara briseis;0.001;Chazara briseis;0.999991285807394;

KP870520;Lepidoptera;Hipparchia hermione;Hipparchia hermione;NA;Hipparchia hermione;0.99478921057068;  
KP870521;Lepidoptera;Pyrgus alveus;NA;NA;Pyrgus alveus;0.944546694610372;  
KP870522;Lepidoptera;Melitaea britomartis;Melicta britomartis;NA;Melitaea britomartis;0.93596070790707;  
KP870524;Lepidoptera;Cupido minimus;NA;0.001;Cupido minimus;0.999751488575214;  
KP870525;Lepidoptera;Gegenes nostrodamus;Gegenes nostrodamus;1;Gegenes nostrodamus;0.999999996883645;  
KP870527;Lepidoptera;Erynnis tages;Erynnis tages;1;Erynnis tages;0.999999281987018;  
KP870529;Lepidoptera;Pyrgus armoricanus;Pyrgus armoricanus;1;Pyrgus armoricanus;0.999997353848817;  
KP870530;Lepidoptera;Boloria pales;Boloria pales;0.998;Boloria pales;0.996520205418986;  
KP870531;Lepidoptera;Pyrgus cacaliae;Pyrgus cacaliae;0.999;Pyrgus cacaliae;0.997229839348598;  
KP870532;Lepidoptera;Pyrgus malvoides;NA;0.076;Pyrgus malvoides;0.887854315566122;  
KP870533;Lepidoptera;Boloria euphrosyne;Boloria euphrosyne;1;Boloria euphrosyne;0.999998102693392;  
KP870535;Lepidoptera;Hipparchia semele;NA;0.002;Hipparchia semele;0.767063813608107;  
KP870536;Lepidoptera;Lycaena phlaeas;Lycaena phlaeas;1;Lycaena phlaeas;0.999999990751576;  
KP870537;Lepidoptera;Argynnis aglaja;NA;0.001;NA;0.99999999999586;  
KP870538;Lepidoptera;Pyrgus andromedae;Pyrgus andromedae;1;Pyrgus andromedae;0.997371767954981;  
KP870540;Lepidoptera;Vanessa atalanta;Vanessa atalanta;1;Vanessa atalanta;0.99999999790589;  
KP870541;Lepidoptera;Papilio machaon;Papilio machaon;0.003;Papilio machaon;0.99836194854697;  
KP870542;Lepidoptera;Pyrgus foulquieri;Pyrgus foulquieri;0.005;Pyrgus foulquieri;0.741885925757585;  
KP870543;Lepidoptera;Colias crocea;NA;0.059;NA;0.99999999999738;  
KP870544;Lepidoptera;Argynnis aglaja;NA;NA;Speyeria aglaja;0.879701754260687;  
KP870547;Lepidoptera;Satyrium w-album;NA;0.056;Satyrium w-album;0.989378230996316;  
KP870550;Lepidoptera;Coenonympha dorus;Coenonympha dorus;1;Coenonympha dorus;0.99999999517769;  
KP870551;Lepidoptera;Apatura iris;Apatura iris;1;Apatura iris;0.99999999999972;  
KP870552;Lepidoptera;Cercyonis lupina;Hyponephele lupina;1;Hyponephele lupina;0.999999983109973;  
KP870554;Lepidoptera;Thymelicus lineola;Thymelicus lineola;1;Thymelicus lineola;0.999995927238524;  
KP870556;Lepidoptera;Cupido minimus;NA;0.216;Cupido lorquini;0.726278995315528;  
KP870557;Lepidoptera;Lycaena hippothoe;NA;NA;Lycaena hippothoe;0.929268253497542;  
KP870558;Lepidoptera;Boloria dia;Boloria dia;1;Boloria dia;0.99999999979764;  
KP870559;Lepidoptera;Coenonympha dorus;Coenonympha dorus;1;Coenonympha dorus;0.9999999988259;  
KP870560;Lepidoptera;Aglais urticae;Aglais urticae;0.004;Aglais urticae;0.995016750255472;  
KP870561;Lepidoptera;Thecla betulae;Thecla betulae;1;Thecla betulae;0.99999999972886;  
KP870562;Lepidoptera;Pararge aegeria;Pararge aegeria;1;Pararge aegeria;0.999999999963165;  
KP870563;Lepidoptera;Brenthis ino;Brenthis ino;0.001;Brenthis ino;0.998434780405276;  
KP870564;Lepidoptera;Cupido minimus;NA;0.009;Cupido minimus;0.999791453712643;  
KP870565;Lepidoptera;Thymelicus lineola;Thymelicus lineola;1;Thymelicus lineola;0.999883815000502;  
KP870566;Lepidoptera;Lasiommata maera;Lasiommata maera;1;Lasiommata maera;0.99999385225814;  
KP870567;Lepidoptera;Lycaena phlaeas;Lycaena phlaeas;1;Lycaena phlaeas;0.999999996363186;  
KP870568;Lepidoptera;Lasiommata maera;Lasiommata maera;1;Lasiommata maera;0.999996744651964;  
KP870569;Lepidoptera;Cupido minimus;NA;0.006;Cupido minimus;0.999768371759258;  
KP870570;Lepidoptera;Callophrys rubi;Callophrys rubi;0.001;Callophrys rubi;0.998606378892944;  
KP870571;Lepidoptera;Heteropterus morpheus;NA;NA;Heteropterus morpheus;0.99999999999943;  
KP870573;Lepidoptera;Thymelicus sylvestris;Thymelicus sylvestris;1;Thymelicus sylvestris;0.999999985350172;  
KP870574;Lepidoptera;Papilio machaon;Papilio machaon;0.001;Papilio machaon;0.999463129150422;  
KP870576;Lepidoptera;Boloria pales;Boloria pales;1;Boloria pales;0.998536542463107;  
KP870577;Lepidoptera;Erebia epiphron;Erebia epiphron;0.996;Erebia epiphron;0.998796590633588;  
KP870578;Lepidoptera;Hipparchia semele;NA;0.001;Hipparchia semele;0.802446092830354;  
KP870580;Lepidoptera;Erebia epiphron;Erebia epiphron;NA;Erebia epiphron;0.998837748029833;  
KP870581;Lepidoptera;Carcharodus alceae;Carcharodus alceae;0.999;Carcharodus alceae;0.999999996339511;  
KP870583;Lepidoptera;Satyrium ilicis;Satyrium ilicis;1;Satyrium ilicis;0.999999963901758;  
KP870584;Lepidoptera;Papilio machaon;Papilio machaon;0.003;Papilio machaon;0.997288237409893;  
KP870586;Lepidoptera;Erebia manto;Erebia manto;NA;Erebia manto;0.999926924199631;  
KP870587;Lepidoptera;Erebia epiphron;Erebia epiphron;0.996;Erebia epiphron;0.998796590633588;  
KP870591;Lepidoptera;Gonepteryx rhamni;NA;0.474;Gonepteryx rhamni;0.982076396127858;  
KP870592;Lepidoptera;Lycaena alciphron;Lycaena alciphron;1;Lycaena alciphron;0.999999842864254;  
KP870593;Lepidoptera;Melitaea didyma;Melitaea didyma;1;Melitaea didyma;0.999515490426369;  
KP870594;Lepidoptera;Hyponephele lycaon;Hyponephele lycaon;1;Hyponephele lycaon;0.9999999927789;  
KP870595;Lepidoptera;Pyrgus armoricanus;Pyrgus armoricanus;1;Pyrgus armoricanus;0.999997353848817;  
KP870596;Lepidoptera;Coenonympha rhodopensis;Coenonympha rhodopensis;0.002;Coenonympha rhodopensis;0.972179742721853;  
KP870598;Lepidoptera;Hipparchia semele;NA;0.002;Hipparchia semele;0.767063813608107;  
KP870600;Lepidoptera;Satyrium ilicis;Satyrium ilicis;1;Satyrium ilicis;0.999999989733169;  
KP870601;Lepidoptera;Thecla betulae;Thecla betulae;1;Thecla betulae;0.99999999972886;  
KP870602;Lepidoptera;Nymphalis c-album;NA;0.215;NA;0.999999192918557;  
KP870603;Lepidoptera;Carcharodus baeticus;Carcharodus baeticus;1;Carcharodus baeticus;0.999983899664537;

KP870604;Lepidoptera;Thymelicus sylvestris;Thymelicus sylvestris;1;Thymelicus sylvestris;0.99999985935205;  
KP870605;Lepidoptera;Brintesia circe;Brintesia circe;1;Brintesia circe;0.999999659617999;  
KP870606;Lepidoptera;Cupido minimus;NA;0.001;NA;0.999999109483477;  
KP870607;Lepidoptera;Thymelicus lineola;Thymelicus lineola;1;Thymelicus lineola;0.999999168558962;  
KP870608;Lepidoptera;Fabriciana adippe;NA;NA;Fabriciana adippe;0.900255826442102;  
KP870610;Lepidoptera;Pyrgus cacaliae;Pyrgus cacaliae;0.999;Pyrgus cacaliae;0.997366941689678;  
KP870611;Lepidoptera;Heteropterus morpheus;NA;NA;Heteropterus morpheus;0.999999999999943;  
KP870613;Lepidoptera;Pyrgus carthami;Pyrgus carthami;1;Pyrgus carthami;0.999990719819382;  
KP870614;Lepidoptera;Maniola cecilia;Pyronia cecilia;1;Pyronia cecilia;1;  
KP870615;Lepidoptera;Pyrgus alveus;NA;NA;Pyrgus alveus;0.941697735568124;  
KP870616;Lepidoptera;Erebia epiphron;Erebia epiphron;NA;Erebia epiphron;0.998837748029833;  
KP870617;Lepidoptera;Brenthis hecate;NA;0.068;Brenthis hecate;0.999053551498733;  
KP870618;Lepidoptera;Pyrgus alveus;NA;NA;Pyrgus alveus;0.957305240793981;  
KP870619;Lepidoptera;Apatura iris;Apatura iris;1;Apatura iris;0.999999999999972;  
KP870620;Lepidoptera;Thymelicus acteon;Thymelicus acteon;1;Thymelicus acteon;0.99999999752248;  
KP870621;Lepidoptera;Arethusana arethusa;Arethusana arethusa;0.03;Arethusana arethusa;0.999965341832138;  
KP870622;Lepidoptera;Hipparchia statilinus;Hipparchia statilinus;1;Hipparchia statilinus;0.99999999399932;  
KP870623;Lepidoptera;Scolitantides orion;Scolitantides orion;1;Scolitantides orion;0.99999893797684;  
KP870624;Lepidoptera;Satyrium spini;Satyrium spini;1;Satyrium spini;0.999997666151069;  
KP870625;Lepidoptera;Erebia epiphron;Erebia epiphron;NA;Erebia epiphron;0.998837748029833;  
KP870626;Lepidoptera;Pyrgus alveus;NA;NA;Pyrgus alveus;0.927745497730628;  
KP870628;Lepidoptera;Coenonympha pamphilus;Coenonympha pamphilus;1;Coenonympha pamphilus;0.999999999992554;  
KP870629;Lepidoptera;Hipparchia semele;NA;0.001;Hipparchia semele;0.802446092830354;  
KP870630;Lepidoptera;Thymelicus lineola;Thymelicus lineola;1;Thymelicus lineola;0.999986269120677;  
KP870631;Lepidoptera;Pyrgus alveus;NA;NA;Pyrgus alveus;0.931326683565012;  
KP870632;Lepidoptera;Aphantopus hyperantus;Aphantopus hyperantus;0.003;Aphantopus hyperantus;0.999999455871523;  
KP870633;Lepidoptera;Thymelicus sylvestris;Thymelicus sylvestris;1;Thymelicus sylvestris;0.999999985935205;  
KP870634;Lepidoptera;Pyrgus alveus;NA;NA;Pyrgus alveus;0.931326683565012;  
KP870635;Lepidoptera;Thymelicus acteon;Thymelicus acteon;1;Thymelicus acteon;0.999999995080373;  
KP870636;Lepidoptera;Aricia artaxerxes;Plebejus argus;1;Aricia artaxerxes;0.999743187199922;  
KP870637;Lepidoptera;Aglais urticae;NA;0.002;Aglais urticae;0.987497593219019;  
KP870640;Lepidoptera;Coenonympha arcania;Coenonympha arcania;0.018;Coenonympha arcania;0.986973789478505;  
KP870641;Lepidoptera;Apatura ilia;NA;0.165;Apatura ilia;0.956796812031481;  
KP870642;Lepidoptera;Carterocephalus palaemon;NA;0.052;Carterocephalus palaemon;0.728445051795325;  
KP870643;Lepidoptera;Thymelicus acteon;Thymelicus acteon;1;Thymelicus acteon;0.99999999752248;  
KP870644;Lepidoptera;Lasiommata megera;Lasiommata megera;1;Lasiommata megera;0.999928528239676;  
KP870647;Lepidoptera;Carcharodus lavatherae;Carcharodus lavatherae;1;Carcharodus lavatherae;0.999958116204794;  
KP870649;Lepidoptera;Hipparchia hermione;Hipparchia hermione;1;Hipparchia hermione;0.999977229560459;  
KP870650;Lepidoptera;Erebia pronoe;Erebia pronoe;1;Erebia pronoe;0.997847273843868;  
KP870652;Lepidoptera;Erebia euryale;NA;NA;Erebia euryale;0.971435689232499;  
KP870656;Lepidoptera;Cercyonis lupina;Hyponphele lupina;1;Hyponphele lupina;0.999999981841427;  
KP870657;Lepidoptera;Aglais urticae;NA;0.002;Aglais urticae;0.987497593219019;  
KP870659;Lepidoptera;Melitaea didyma;Melitaea didyma;1;Melitaea didyma;0.999727166931204;  
KP870660;Lepidoptera;Lycaena phlaeas;Lycaena phlaeas;1;Lycaena phlaeas;0.999999996363186;  
KP870661;Lepidoptera;Boloria euphrosyne;Boloria euphrosyne;1;Boloria euphrosyne;0.99998552914401;  
KP870662;Lepidoptera;Aglais urticae;NA;0.002;Aglais urticae;0.987497593219019;  
KP870663;Lepidoptera;Coenonympha pamphilus;Coenonympha pamphilus;1;Coenonympha pamphilus;0.999999999999744;  
KP870665;Lepidoptera;Thymelicus acteon;Thymelicus acteon;1;Thymelicus acteon;0.99999999752248;  
KP870667;Lepidoptera;Aphantopus hyperantus;Aphantopus hyperantus;NA;Aphantopus hyperantus;0.99996892516745;  
KP870668;Lepidoptera;Lasiommata megera;Lasiommata megera;1;Lasiommata megera;0.999928528239676;  
KP870669;Lepidoptera;Pyrgus foulquieri;Pyrgus foulquieri;0.005;Pyrgus foulquieri;0.741885925757585;  
KP870670;Lepidoptera;Pyrgus foulquieri;Pyrgus foulquieri;0.005;Pyrgus foulquieri;0.741885925757585;  
KP870672;Lepidoptera;Hipparchia semele;NA;0.001;Hipparchia semele;0.77443093634494;  
KP870675;Lepidoptera;Pyrgus onopordi;Pyrgus onopordi;1;Pyrgus onopordi;0.999997111229755;  
KP870676;Lepidoptera;Minois dryas;NA;0.025;Minois dryas;0.850746026247397;  
KP870678;Lepidoptera;Callophrys rubi;NA;0.002;Callophrys rubi;0.998841790162773;  
KP870679;Lepidoptera;Cupido minimus;NA;0.009;Cupido minimus;0.999791453712643;  
KP870681;Lepidoptera;Erebia pandrose;Erebia pandrose;0.998;Erebia pandrose;0.99797994145198;  
KP870683;Lepidoptera;Lasiommata maera;Lasiommata maera;1;Lasiommata maera;0.999997945450226;  
KP870685;Lepidoptera;Maniola tithonus;Pyronia tithonus;1;Pyronia tithonus;1;

KP870687;Lepidoptera;Fabriciana adippe;NA;0.392;Fabriciana adippe;0.917232439736753;  
KP870688;Lepidoptera;Polyommatus escheri;Polyommatus escheri;1;Polyommatus  
escheri;0.999998418369956;  
KP870689;Lepidoptera;Arethusana arethusa;Arethusana arethusa;0.045;Arethusana  
arethusa;0.999962297609568;  
KP870690;Lepidoptera;Gonepteryx rhamni;NA;0.474;Gonepteryx rhamni;0.982076396127858;  
KP870692;Lepidoptera;Lycaena hippothoe;NA;NA;Lycaena hippothoe;0.928973453460131;  
KP870694;Lepidoptera;Plebejus argus;Plebejus argus;0.006;Plebejus argus;0.988245271162348;  
KP870695;Lepidoptera;Issoria lathonia;Issoria lathonia;1;Issoria lathonia;0.99999999989257;  
KP870696;Lepidoptera;Aglaia urticae;NA;0.002;Aglaia urticae;0.987497593219019;  
KP870697;Lepidoptera;Colias crocea;NA;0.059;NA;0.99999999999738;  
KP870700;Lepidoptera;Apatura iris;Apatura iris;1;Apatura iris;0.99999999999972;  
KP870701;Lepidoptera;Celastrina argiolus;Celastrina argiolus;1;Celastrina  
argiolus;0.999037794018796;  
KP870702;Lepidoptera;Coenonympha lyllus;Coenonympha pamphilus;1;Coenonympha  
pamphilus;0.999999999996902;  
KP870704;Lepidoptera;Melitaea didyma;Melitaea didyma;1;Melitaea didyma;0.994281215815027;  
KP870705;Lepidoptera;Coenonympha pamphilus;Coenonympha pamphilus;1;Coenonympha  
pamphilus;0.999999999999744;  
KP870706;Lepidoptera;Brenthis daphne;Brenthis daphne;1;Brenthis daphne;0.997172799742872;  
KP870707;Lepidoptera;Boloria euphrosyne;Boloria euphrosyne;0.001;Boloria  
euphrosyne;0.999965608361016;  
KP870708;Lepidoptera;Minois dryas;NA;0.025;Minois dryas;0.850746026247397;  
KP870710;Lepidoptera;Boloria titania;Boloria titania;0.001;Boloria titania;0.999933039420112;  
KP870711;Lepidoptera;Apatura iris;Apatura iris;1;Apatura iris;0.99999999999972;  
KP870712;Lepidoptera;Pyrgus andromedae;Pyrgus andromedae;1;Pyrgus andromedae;0.997371767954981;  
KP870713;Lepidoptera;Thymelicus sylvestris;Thymelicus sylvestris;1;Thymelicus  
sylvestris;0.999999985935205;  
KP870714;Lepidoptera;Maniola cecilia;Pyronia cecilia;1;Pyronia cecilia;1;  
KP870715;Lepidoptera;Apatura iris;Apatura iris;1;Apatura iris;0.99999999999972;  
KP870718;Lepidoptera;Minois dryas;NA;0.011;Minois dryas;0.911200988453291;  
KP870719;Lepidoptera;Carcharodus alceae;Carcharodus alceae;0.002;Carcharodus  
alceae;0.999999995967272;  
KP870723;Lepidoptera;Helleia helle;Lycaena helle;1;Lycaena helle;0.999999995066105;  
KP870724;Lepidoptera;Gegenes nostrodamus;Gegenes nostrodamus;1;Gegenes  
nostrodamus;0.999999996883645;  
KP870725;Lepidoptera;Favonius quercus;NA;0.135;NA;0.999999999364868;  
KP870726;Lepidoptera;Lasiommata megera;Lasiommata megera;1;Lasiommata megera;0.999928528239676;  
KP870727;Lepidoptera;Pyrgus alveus;NA;NA;Pyrgus alveus;0.931326683565012;  
KP870728;Lepidoptera;Minois dryas;NA;0.025;Minois dryas;0.850746026247397;  
KP870730;Lepidoptera;Arethusana arethusa;NA;0.062;Arethusana arethusa;0.999962489703143;  
KP870732;Lepidoptera;Thecla betulae;Thecla betulae;1;Thecla betulae;0.99999999961346;  
KP870733;Lepidoptera;Maniola tithonus;Pyronia tithonus;1;Pyronia tithonus;1;  
KP870735;Lepidoptera;Lampides boeticus;Lampides boeticus;1;Lampides boeticus;0.99999998557229;  
KP870737;Lepidoptera;Pyrgus cacaliae;Pyrgus cacaliae;0.999;Pyrgus cacaliae;0.997229839348598;  
KP870740;Lepidoptera;Brenthis daphne;NA;0.111;NA;0.999999999817875;  
KP870743;Lepidoptera;Minois dryas;NA;0.025;Minois dryas;0.850746026247397;  
KP870744;Lepidoptera;Melitaea didyma;Melitaea didyma;NA;Melitaea didyma;0.980272836986251;  
KP870745;Lepidoptera;Apatura ilia;NA;0.165;Apatura ilia;0.956796812031481;  
KP870747;Lepidoptera;Chazara briseis;Chazara briseis;0.002;Chazara briseis;0.999962623085466;  
KP870748;Lepidoptera;Pyrgus alveus;NA;NA;Pyrgus alveus;0.931326683565012;  
KP870749;Lepidoptera;Melitaea didyma;Melitaea didyma;1;Melitaea didyma;0.993439843713843;  
KP870750;Lepidoptera;Hipparchia fagi;NA;NA;Hipparchia fagi;0.987735485715459;  
KP870751;Lepidoptera;Thymelicus sylvestris;NA;0.324;Thymelicus sylvestris;0.999940778442454;  
KP870752;Lepidoptera;Oeneis glacialis;NA;NA;Oeneis glacialis;0.835029434446287;  
KP870753;Lepidoptera;Lasiommata megera;Lasiommata megera;1;Lasiommata megera;0.999928528239676;  
KP870757;Lepidoptera;Thymelicus acteon;Thymelicus acteon;1;Thymelicus acteon;0.999999963752175;  
KP870759;Lepidoptera;Minois dryas;NA;0.025;Minois dryas;0.850746026247397;  
KP870760;Lepidoptera;Melitaea parthenoides;Melitaea parthenoides;1;Melitaea  
parthenoides;0.999999993530452;  
KP870762;Lepidoptera;Melitaea deione;Melitaea deione;1;Melitaea deione;0.999999999588169;  
KP870763;Lepidoptera;Fabriciana niobe;NA;0.001;Fabriciana niobe;0.97642748807868;  
KP870764;Lepidoptera;Pyrgus foulquieri;Pyrgus foulquieri;0.005;Pyrgus  
foulquieri;0.741885925757585;  
KP870768;Lepidoptera;Brenthis daphne;Brenthis daphne;1;Brenthis daphne;0.997172799742872;  
KP870769;Lepidoptera;Phengaris arion;NA;0.054;Phengaris arion;0.938397095316026;  
KP870770;Lepidoptera;Coenonympha rhodopensis;Coenonympha rhodopensis;0.01;Coenonympha  
rhodopensis;0.912323431995304;  
KP870772;Lepidoptera;Hipparchia hermione;NA;NA;NA;0.999999999999991;  
KP870774;Lepidoptera;Carterocephalus palaemon;NA;0.033;Carterocephalus  
palaemon;0.744872231374349;  
KP870777;Lepidoptera;Thymelicus sylvestris;Thymelicus sylvestris;1;Thymelicus  
sylvestris;0.999999985935205;  
KP870778;Lepidoptera;Erebia triaria;NA;0.116;Erebia triarius;0.702820281716756;  
KP870779;Lepidoptera;Satyrium esculi;Satyrium esculi;1;Satyrium esculi;0.999999957367948;  
KP870780;Lepidoptera;Erebia oeme;NA;0.175;Erebia oeme;0.9999999991374;  
KP870781;Lepidoptera;Scolitantides orion;Scolitantides orion;1;Scolitantides  
orion;0.999999953757596;

KP870789;Lepidoptera;Fabriciana niobe;NA;0.007;Fabriciana niobe;0.984627988609443;  
 KP870792;Lepidoptera;Cupido minimus;NA;0.009;Cupido minimus;0.999791453712643;  
 KP870794;Lepidoptera;Phengaris arion;NA;0.054;Phengaris arion;0.938397095316026;  
 KP870797;Lepidoptera;Melitaea trivia;Melitaea trivia;1;Melitaea trivia;0.99999999960949;  
 KP870798;Lepidoptera;Polyommatus thersites;NA;0.121;Polyommatus thersites;0.999999047413893;  
 KP870801;Lepidoptera;Boloria dia;Boloria dia;1;Boloria dia;0.99999999980503;  
 KP870802;Lepidoptera;Melitaea trivia;Melitaea trivia;1;Melitaea trivia;0.99999999977604;  
 KP870803;Lepidoptera;Cupido minimus;NA;0.216;Cupido lorquinii;0.726278995315528;  
 KP870805;Lepidoptera;Melitaea cinxia;Melitaea cinxia;1;Melitaea cinxia;0.99999999999488;  
 KP870806;Lepidoptera;Satyrium esculi;Satyrium esculi;1;Satyrium esculi;0.999999957367948;  
 KP870807;Lepidoptera;Satyrium ilicis;Satyrium ilicis;1;Satyrium ilicis;0.99999987901305;  
 KP870808;Lepidoptera;Chazara briseis;Chazara briseis;0.001;Chazara briseis;0.999984130678865;  
 KP870809;Lepidoptera;Thymelicus acteon;Thymelicus acteon;1;Thymelicus acteon;0.9999999752248;  
 KP870810;Lepidoptera;Lampides boeticus;Lampides boeticus;NA;Lampides boeticus;0.99999999307221;  
 KP870811;Lepidoptera;Vanessa atalanta;Vanessa atalanta;1;Vanessa atalanta;0.99999999757762;  
 KP870812;Lepidoptera;Erebia meolans;Erebia meolans;NA;Erebia meolans;0.999791585691543;  
 KP870813;Lepidoptera;Satyrium w-album;NA;0.158;Satyrium w-album;0.991135458498042;  
 KP870815;Lepidoptera;Cupido minimus;NA;0.089;Cupido lorquinii;0.728383684109358;  
 KP870817;Lepidoptera;Hipparchia hermione;NA;NA;NA;0.99999999999991;  
 KP870818;Lepidoptera;Fabriciana niobe;NA;0.014;Fabriciana niobe;0.980110477277841;  
 KP870819;Lepidoptera;Pyrgus armoricanus;Pyrgus armoricanus;1;Pyrgus armoricanus;0.999998858647755;  
 KP870820;Lepidoptera;Carcharodus baeticus;Carcharodus baeticus;1;Carcharodus baeticus;0.999983899664537;  
 KP870822;Lepidoptera;Chazara briseis;Chazara briseis;0.003;Chazara briseis;0.999944393154726;  
 KP870823;Lepidoptera;Pyrgus armoricanus;Pyrgus armoricanus;1;Pyrgus armoricanus;0.99997353848817;  
 KP870824;Lepidoptera;Pararge aegeria;Pararge aegeria;1;Pararge aegeria;0.999999999963165;  
 KP870825;Lepidoptera;Cupido minimus;NA;0.024;Cupido lorquinii;0.822471829137295;  
 KP870827;Lepidoptera;Satyrium esculi;Satyrium esculi;1;Satyrium esculi;0.999999991927865;  
 KP870829;Lepidoptera;Minois dryas;NA;0.025;Minois dryas;0.850746026247397;  
 KP870830;Lepidoptera;Anthocharis cardamines;Anthocharis cardamines;1;Anthocharis cardamines;0.999999988995796;  
 KP870831;Lepidoptera;Pyrgus alveus;NA;NA;Pyrgus alveus;0.944546694610372;  
 KP870832;Lepidoptera;Pyrgus cacaliae;Pyrgus cacaliae;0.999;Pyrgus cacaliae;0.997229839348598;  
 KP870834;Lepidoptera;Arethusana arethusa;Arethusana arethusa;0.045;Arethusana arethusa;0.999962297609568;  
 KP870836;Lepidoptera;Melitaea didyma;Melitaea didyma;1;Melitaea didyma;0.978209045677336;  
 KP870838;Lepidoptera;Carcharodus baeticus;Carcharodus baeticus;1;Carcharodus baeticus;0.999983899664537;  
 KP870839;Lepidoptera;Heteropterus morpheus;NA;NA;Heteropterus morpheus;0.999999999999943;  
 KP870841;Lepidoptera;Melitaea cinxia;Melitaea cinxia;1;Melitaea cinxia;0.999999999999517;  
 KP870842;Lepidoptera;Satyrium spini;Satyrium spini;1;Satyrium spini;0.99998173309697;  
 KP870843;Lepidoptera;Ceryonius lupina;Hyponephele lupina;1;Hyponephele lupina;0.999999973380085;  
 KP870848;Lepidoptera;Pyrgus armoricanus;Pyrgus armoricanus;1;Pyrgus armoricanus;0.999998326740418;  
 KP870849;Lepidoptera;Coenonympha pamphilus;Coenonympha pamphilus;1;Coenonympha pamphilus;0.999999999999946;  
 KP870851;Lepidoptera;Phengaris arion;NA;0.048;Phengaris arion;0.925121569803617;  
 KP870853;Lepidoptera;Satyrium spini;Satyrium spini;1;Satyrium spini;0.999997334596599;  
 KP870854;Lepidoptera;Celastrina argiolus;Celastrina argiolus;1;Celastrina argiolus;0.999527385150531;  
 KP870857;Lepidoptera;Carcharodus alceae;Carcharodus alceae;1;Carcharodus alceae;0.999999996479374;  
 KP870860;Lepidoptera;Carcharodus alceae;Carcharodus alceae;0.001;Carcharodus alceae;0.999999970193983;  
 KP870861;Lepidoptera;Brenthis ino;Brenthis ino;0.001;Brenthis ino;0.993162660176952;  
 KP870862;Lepidoptera;Pyrgus carthami;Pyrgus carthami;1;Pyrgus carthami;0.999981615717954;  
 KP870864;Lepidoptera;Pyrgus alveus;NA;NA;Pyrgus alveus;0.931326683565012;  
 KP870869;Lepidoptera;Hipparchia hermione;NA;NA;NA;0.999999999999991;  
 KP870870;Lepidoptera;Satyrium spini;Satyrium spini;1;Satyrium spini;0.999997869643319;  
 KP870871;Lepidoptera;Arethusana arethusa;Arethusana arethusa;1;Arethusana arethusa;0.999999787144355;  
 KP870872;Lepidoptera;Fabriciana adippe;Fabriciana adippe;0.001;Fabriciana adippe;0.999538788643547;  
 KP870873;Lepidoptera;Parnassius apollo;Parnassius apollo;1;Parnassius apollo;0.998823981816303;  
 KP870874;Lepidoptera;Plebejus argus;Plebejus argus;1;Plebejus argus;0.997297027003937;  
 KP870877;Lepidoptera;Apatura iris;Apatura iris;1;Apatura iris;0.999999999999972;  
 KP870879;Lepidoptera;Brenthis ino;Brenthis ino;0.998;Brenthis ino;0.995325118916732;  
 KP870880;Lepidoptera;Polyommatus thersites;Polyommatus thersites;0.999;Polyommatus thersites;0.99999985539095;  
 KP870881;Lepidoptera;Maniola tithonus;Pyronia tithonus;1;Pyronia tithonus;1;  
 KP870882;Lepidoptera;Celastrina argiolus;Celastrina argiolus;1;Celastrina argiolus;0.999527385150531;  
 KP870883;Lepidoptera;Coenonympha rhodopensis;Coenonympha rhodopensis;0.001;Coenonympha rhodopensis;0.945819137649883;  
 KP870884;Lepidoptera;Pyrgus foulquieri;Pyrgus foulquieri;0.005;Pyrgus foulquieri;0.741885925757585;

KP870885;Lepidoptera;Polyommatus thersites;Polyommatus thersites;0.999;Polyommatus  
thersites;0.999999935754092;  
KP870887;Lepidoptera;Cupido minimus;NA;0.216;Cupido lorquini;0.726278995315528;  
KP870888;Lepidoptera;Cupido minimus;NA;0.083;NA;0.99998549281497;  
KP870891;Lepidoptera;Brenthis daphne;Brenthis daphne;0.001;Brenthis daphne;0.997781825264304;  
KP870894;Lepidoptera;Satyrium esculi;Satyrium esculi;1;Satyrium esculi;0.999999836089486;  
KP870898;Lepidoptera;Brenthis ino;NA;0.074;Brenthis ino;0.799697987139591;  
KP870899;Lepidoptera;Aglais urticae;NA;0.002;Aglais urticae;0.987497593219019;  
KP870900;Lepidoptera;Coenonympha dorus;Coenonympha dorus;1;Coenonympha dorus;0.99999999766146;  
KP870901;Lepidoptera;Euphydryas aurinia;NA;0.31;Euphydryas aurinia;0.993387708761386;  
KP870902;Lepidoptera;Thymelicus sylvestris;Thymelicus sylvestris;1;Thymelicus  
sylvestris;0.99999985935205;  
KP870903;Lepidoptera;Pyrgus andromedae;Pyrgus andromedae;1;Pyrgus andromedae;0.999808671605833;  
KP870906;Lepidoptera;Thymelicus acteon;Thymelicus acteon;1;Thymelicus acteon;0.9999999752248;  
KP870907;Lepidoptera;Favonius quercus;NA;NA;Favonius quercus;0.82037508280549;  
KP870910;Lepidoptera;Aglais urticae;Aglais urticae;0.004;Aglais urticae;0.995016750255472;  
KP870911;Lepidoptera;Aglais urticae;NA;0.002;Aglais urticae;0.987497593219019;  
KP870913;Lepidoptera;Fabriciana adippe;NA;NA;Fabriciana adippe;0.885713811096646;  
KP870915;Lepidoptera;Pyrgus carthami;Pyrgus carthami;1;Pyrgus carthami;0.999981615717954;  
KP870916;Lepidoptera;Erebia epiphron;Erebia epiphron;0.996;Erebia epiphron;0.998796590633588;  
KP870917;Lepidoptera;Hipparchia hermione;NA;NA;NA;0.99999999999991;  
KP870918;Lepidoptera;Satyrium w-album;NA;0.056;Satyrium w-album;0.989378230996316;  
KP870919;Lepidoptera;Satyrium spini;Satyrium spini;1;Satyrium spini;0.99993192602438;  
KP870920;Lepidoptera;Arethusana arethusa;Arethusana arethusa;0.047;Arethusana  
arethusa;0.999974033031615;  
KP870921;Lepidoptera;Glaucopsyche melanops;Glaucopsyche melanops;1;Glaucopsyche  
melanops;0.999952924254607;  
KP870923;Lepidoptera;Satyrium acaciae;Satyrium acaciae;1;Satyrium acaciae;0.999999938005745;  
KP870924;Lepidoptera;Thymelicus sylvestris;NA;0.324;Thymelicus sylvestris;0.999940778442454;  
KP870927;Lepidoptera;Papilio machaon;Papilio machaon;0.001;Papilio machaon;0.999463129150422;  
KP870928;Lepidoptera;Aglais urticae;NA;0.002;Aglais urticae;0.987497593219019;  
KP870929;Lepidoptera;Satyrium acaciae;Satyrium acaciae;1;Satyrium acaciae;0.99999991343697;  
KP870930;Lepidoptera;Satyrium esculi;Satyrium esculi;1;Satyrium esculi;0.99999997326492;  
KP870931;Lepidoptera;Erebia epiphron;Erebia epiphron;0.996;Erebia epiphron;0.998796590633588;  
KP870932;Lepidoptera;Erynnis tages;Erynnis tages;1;Erynnis tages;0.999996685244108;  
KP870933;Lepidoptera;Callophrys rubi;NA;0.002;Callophrys rubi;0.998841790162773;  
KP870934;Lepidoptera;Hipparchia statilinus;Hipparchia statilinus;1;Hipparchia  
statilinus;0.99999999999784;  
KP870935;Lepidoptera;Polyommatus thersites;Polyommatus thersites;0.999;Polyommatus  
thersites;0.999999916395897;  
KP870936;Lepidoptera;Lycaena virgaureae;NA;0.125;Lycaena virgaureae;0.999002077309996;  
KP870937;Lepidoptera;Thymelicus sylvestris;NA;0.324;Thymelicus sylvestris;0.999940778442454;  
KP870938;Lepidoptera;Aphantopus hyperantus;Aphantopus hyperantus;0.003;Aphantopus  
hyperantus;0.999999455871523;  
KP870941;Lepidoptera;Hipparchia hermione;Hipparchia hermione;1;Hipparchia  
hermione;0.999783016818011;  
KP870942;Lepidoptera;Hipparchia hermione;Hipparchia hermione;1;Hipparchia  
hermione;0.999905429250471;  
KP870944;Lepidoptera;Melitaea deione;Melitaea deione;1;Melitaea deione;0.999999999503189;  
KP870945;Lepidoptera;Fabriciana niobe;NA;0.005;Fabriciana niobe;0.992125835358755;  
KP870949;Lepidoptera;Vanessa cardui;Vanessa cardui;1;Vanessa cardui;0.99997579965112;  
KP870951;Lepidoptera;Satyrium ilicis;Satyrium ilicis;1;Satyrium ilicis;0.999999987901305;  
KP870953;Lepidoptera;Melitaea deione;Melitaea deione;1;Melitaea deione;0.999999999503189;  
KP870955;Lepidoptera;Euphydryas maturna;NA;0.126;Euphydryas maturna;0.885705216462044;  
KP870956;Lepidoptera;Thymelicus acteon;Thymelicus acteon;1;Thymelicus acteon;0.9999999752248;  
KP870957;Lepidoptera;Thymelicus sylvestris;NA;0.324;Thymelicus sylvestris;0.999940778442454;  
KP870958;Lepidoptera;Fabriciana adippe;NA;0.001;Fabriciana adippe;0.924751459079782;  
KP870959;Lepidoptera;Maniola cecilia;Pyronia cecilia;1;Pyronia cecilia;1;  
KP870960;Lepidoptera;Lycaena phlaeas;Lycaena phlaeas;1;Lycaena phlaeas;0.999999996363186;  
KP870962;Lepidoptera;Celastrina argiolus;Celastrina argiolus;1;Celastrina  
argiolus;0.999037794018796;  
KP870964;Lepidoptera;Callophrys rubi;NA;0.001;Callophrys rubi;0.998898923869396;  
KP870966;Lepidoptera;Pararge aegeria;Pararge aegeria;1;Pararge aegeria;0.999999999963165;  
KP870968;Lepidoptera;Colias crocea;NA;0.059;NA;0.999999999999738;  
KP870969;Lepidoptera;Erebia meolans;Erebia meolans;NA;Erebia meolans;0.999708273694177;  
KP870970;Lepidoptera;Thymelicus acteon;Thymelicus acteon;1;Thymelicus acteon;0.9999999752248;  
KP870971;Lepidoptera;Brenthis daphne;Brenthis daphne;1;Brenthis daphne;0.997172799742872;  
KP870972;Lepidoptera;Pyrgus alveus;NA;NA;Pyrgus alveus;0.931326683565012;  
KP870973;Lepidoptera;Pyrgus andromedae;Pyrgus andromedae;1;Pyrgus andromedae;0.998809971311763;  
KP870977;Lepidoptera;Maniola cecilia;Pyronia cecilia;NA;Pyronia cecilia;1;  
KP870979;Lepidoptera;Satyrus ferula;Satyrus ferula;0.001;Satyrus ferula;0.993138467028266;  
KP870980;Lepidoptera;Erebia epiphron;Erebia epiphron;NA;Erebia epiphron;0.998837748029833;  
KP870981;Lepidoptera;Scolitantides orion;Scolitantides orion;1;Scolitantides  
orion;0.999999984804305;  
KP870984;Lepidoptera;Pyrgus armoricanus;Pyrgus armoricanus;1;Pyrgus  
armoricanus;0.999997353848817;  
KP870985;Lepidoptera;Limenitis camilla;Limenitis camilla;0.009;Limenitis  
camilla;0.9999828626808;



KP870986;Lepidoptera;Pyrgus cacaliae;Pyrgus cacaliae;0.999;Pyrgus cacaliae;0.997229839348598;  
KP870987;Lepidoptera;Pyrgus andromedae;Pyrgus andromedae;1;Pyrgus andromedae;0.997371767954981;  
KP870989;Lepidoptera;Apatura iris;Apatura iris;1;Apatura iris;0.999999999999972;  
KP870990;Lepidoptera;Brintesia circe;Brintesia circe;1;Brintesia circe;0.99999744550143;  
KP870992;Lepidoptera;Minois dryas;NA;0.025;Minois dryas;0.850746026247397;  
KP870993;Lepidoptera;Pyrgus alveus;NA;NA;Pyrgus alveus;0.931326683565012;  
KP870995;Lepidoptera;Minois dryas;NA;0.025;Minois dryas;0.850746026247397;  
KP870996;Lepidoptera;Aglais urticae;Aglais urticae;0.001;Aglais urticae;0.994396335177485;  
KP870998;Lepidoptera;Lasioommata maera;Lasioommata maera;1;Lasioommata maera;0.999997945450226;  
KP870999;Lepidoptera;Hipparchia hermione;Hipparchia hermione;1;Hipparchia  
hermione;0.999867997302225;  
KP871001;Lepidoptera;Pyrgus andromedae;Pyrgus andromedae;1;Pyrgus andromedae;0.997371767954981;  
KP871002;Lepidoptera;Satyrium spini;Satyrium spini;1;Satyrium spini;0.999990225283962;  
KP871003;Lepidoptera;Pyrgus alveus;NA;NA;Pyrgus alveus;0.944546694610372;  
KP871004;Lepidoptera;Gonepteryx rhamni;Gonepteryx rhamni;0.002;Gonepteryx  
rhamni;0.999788876860678;  
KP871005;Lepidoptera;Plebejus argus;NA;NA;Plebejus argus;0.969283117748927;  
KP871007;Lepidoptera;Cupido minimus;NA;0.009;Cupido minimus;0.999791453712643;  
KP871008;Lepidoptera;Minois dryas;NA;0.025;Minois dryas;0.850746026247397;  
KP871009;Lepidoptera;Vanessa cardui;Vanessa cardui;1;Vanessa cardui;0.999999459983318;  
KP871010;Lepidoptera;Cupido minimus;NA;0.009;Cupido minimus;0.999791453712643;  
KP871012;Lepidoptera;Lycaena tityrus;Lycaena tityrus;1;Lycaena tityrus;0.999997855580031;  
KP871015;Lepidoptera;Apatura ilia;NA;0.165;Apatura ilia;0.956796812031481;  
KP871017;Lepidoptera;Colias crocea;NA;0.059;NA;0.999999999999738;  
KP871018;Lepidoptera;Hipparchia semele;NA;0.001;Hipparchia semele;0.862655722502182;  
KP871020;Lepidoptera;Agriades glandon;NA;0.002;Agriades glandon;0.987149722429845;  
KP871021;Lepidoptera;Aglais urticae;NA;0.001;Aglais urticae;0.98874782597203;  
KP871023;Lepidoptera;Cupido osiris;Cupido osiris;1;Cupido osiris;0.999998710927265;  
KP871024;Lepidoptera;Thymelicus acteon;Thymelicus acteon;1;Thymelicus acteon;0.99999998000504;  
KP871027;Lepidoptera;Brenthis hecate;NA;0.005;Brenthis hecate;0.947748679440882;  
KP871029;Lepidoptera;Satyrium w-album;NA;0.056;Satyrium w-album;0.989378230996316;  
KP871031;Lepidoptera;Pyrgus foulquieri;Pyrgus foulquieri;0.005;Pyrgus  
foulquieri;0.741885925757585;  
KP871032;Lepidoptera;Polyommatus escheri;Polyommatus escheri;1;Polyommatus  
escheri;0.999999994183696;  
KP871033;Lepidoptera;Erebia euryale;NA;NA;Erebia euryale;0.93493911427573;  
KP871035;Lepidoptera;Thecla betulae;Thecla betulae;1;Thecla betulae;0.99999999972886;  
KP871036;Lepidoptera;Satyrium spini;Satyrium spini;1;Satyrium spini;0.999998173309697;  
KP871037;Lepidoptera;Pieris napi;NA;NA;NA;100.000.000.000.001;  
KP871039;Lepidoptera;Cupido minimus;NA;0.009;Cupido minimus;0.999791453712643;  
KP871040;Lepidoptera;Vanessa cardui;Vanessa cardui;1;Vanessa cardui;0.999999803450484;  
KP871041;Lepidoptera;Brenthis ino;Brenthis ino;0.998;Brenthis ino;0.995325118916732;  
KP871042;Lepidoptera;Lampides boeticus;Lampides boeticus;1;Lampides boeticus;0.99999999545906;  
KP871046;Lepidoptera;Pyrgus alveus;NA;NA;Pyrgus alveus;0.931326683565012;  
KP871047;Lepidoptera;Callophrys rubi;NA;0.002;Callophrys rubi;0.998841790162773;  
KP871049;Lepidoptera;Heteropterus morpheus;NA;NA;Heteropterus morpheus;0.999999999999943;  
KP871051;Lepidoptera;Brenthis hecate;NA;0.031;Brenthis hecate;0.99924976100958;  
KP871052;Lepidoptera;Satyrium acaciae;Satyrium acaciae;1;Satyrium acaciae;0.999999951077798;  
KP871054;Lepidoptera;Pyrgus alveus;NA;NA;Pyrgus alveus;0.931326683565012;  
KP871055;Lepidoptera;Erebia meolans;Erebia meolans;NA;Erebia meolans;0.999835953426128;  
KP871059;Lepidoptera;Boloria pales;Boloria pales;1;Boloria pales;0.998536542463107;  
KP871061;Lepidoptera;Apatura iris;Apatura iris;1;Apatura iris;0.999999999999972;  
KP871063;Lepidoptera;Gonepteryx rhamni;Gonepteryx rhamni;1;Gonepteryx rhamni;0.999865258729401;  
KP871065;Lepidoptera;Callophrys rubi;NA;0.001;Callophrys rubi;0.99870518510598;  
KP871069;Lepidoptera;Lysandra coridon;Lysandra coridon;NA;NA;0.999966047347831;  
KP871070;Lepidoptera;Arethusana arethusana;NA;0.053;Arethusana arethusana;0.999947559376708;  
KP871071;Lepidoptera;Charaxes jasius;Charaxes jasius;NA;Charaxes jasius;0.988941612024336;  
KP871072;Lepidoptera;Agriades glandon;NA;0.002;Agriades glandon;0.987149722429845;  
KP871074;Lepidoptera;Apatura ilia;NA;0.165;Apatura ilia;0.956796812031481;  
KP871075;Lepidoptera;Chazara briseis;Chazara briseis;1;Chazara briseis;0.999985122765388;  
KP871079;Lepidoptera;Lycaena phlaeas;Lycaena phlaeas;1;Lycaena phlaeas;0.99999996363186;  
KP871082;Lepidoptera;Thecla betulae;Thecla betulae;1;Thecla betulae;0.99999999974676;  
KP871084;Lepidoptera;Coenonympha pamphilus;Coenonympha pamphilus;1;Coenonympha  
pamphilus;0.9999999999999744;  
KP871089;Lepidoptera;Anthocharis cardamines;Anthocharis cardamines;0.001;Anthocharis  
cardamines;0.999999816482432;  
KP871090;Lepidoptera;Pyrgus cacaliae;Pyrgus cacaliae;0.999;Pyrgus cacaliae;0.997229839348598;  
KP871091;Lepidoptera;Callophrys rubi;NA;0.003;Callophrys rubi;0.998769313902836;  
KP871092;Lepidoptera;Plebejus idas;NA;0.007;NA;0.999546324331549;  
KP871093;Lepidoptera;Thymelicus acteon;Thymelicus acteon;1;Thymelicus acteon;0.99999999752248;  
KP871094;Lepidoptera;Coenonympha dorus;Coenonympha dorus;1;Coenonympha dorus;0.99999999988259;  
KP871096;Lepidoptera;Aglais urticae;Aglais urticae;0.001;Aglais urticae;0.994396335177485;  
KP871098;Lepidoptera;Chazara briseis;Chazara briseis;0.001;Chazara briseis;0.999942611553846;  
KP871099;Lepidoptera;Limenitis camilla;Limenitis camilla;0.01;Limenitis  
camilla;0.999988164408943;  
KP871103;Lepidoptera;Pyrgus armoricanus;Pyrgus armoricanus;1;Pyrgus  
armoricanus;0.999997353848817;  
KP871105;Lepidoptera;Cupido minimus;NA;0.009;Cupido minimus;0.999791453712643;

KP871107;Lepidoptera;Satyrium w-album;NA;0.056;Satyrium w-album;0.989378230996316;  
KP871109;Lepidoptera;Thymelicus lineola;Thymelicus lineola;1;Thymelicus  
lineola;0.999930684106799;  
KP871110;Lepidoptera;Pyrgus onopordi;Pyrgus onopordi;1;Pyrgus onopordi;0.999997111229755;  
KP871111;Lepidoptera;Gonepteryx cleopatra;Gonepteryx cleopatra;0.998;Gonepteryx  
cleopatra;0.999118636582266;  
KP871113;Lepidoptera;Brintesia circe;Brintesia circe;1;Brintesia circe;0.99999527019638;  
KP871119;Lepidoptera;Pyrgus alveus;NA;NA;Pyrgus alveus;0.944546694610372;  
KP871121;Lepidoptera;Coenonympha arcania;NA;0.161;Coenonympha arcania;0.962300604949033;  
KP871124;Lepidoptera;Maniola tithonus;Pyronia tithonus;NA;Pyronia tithonus;1;  
KP871125;Lepidoptera;Aricia eumedon;Eumedonia eumedon;NA;Eumedonia eumedon;0.99134759589959;  
KP871126;Lepidoptera;Araschnia levana;Araschnia levana;1;Araschnia levana;0.999999772187832;  
KP871127;Lepidoptera;Pyrgus carthami;Pyrgus carthami;1;Pyrgus carthami;0.999981615717954;  
KP871129;Lepidoptera;Brenthis ino;Brenthis ino;0.001;Brenthis ino;0.998434780405276;  
KP871130;Lepidoptera;Hipparchia hermione;Hipparchia hermione;NA;Hipparchia  
hermione;0.995161599525584;  
KP871134;Lepidoptera;Araschnia levana;Araschnia levana;1;Araschnia levana;0.99999980307634;  
KP871137;Lepidoptera;Erynnis tages;Erynnis tages;1;Erynnis tages;0.999999281987018;  
KP871139;Lepidoptera;Thecla betulae;Thecla betulae;1;Thecla betulae;0.9999999972886;  
KP871140;Lepidoptera;Thymelicus sylvestris;Thymelicus sylvestris;1;Thymelicus  
sylvestris;0.99999985935205;  
KP871141;Lepidoptera;Coenonympha pamphilus;Coenonympha pamphilus;1;Coenonympha  
pamphilus;0.99999999999744;  
KP871142;Lepidoptera;Fabriciana adippe;Fabriciana adippe;0.012;Fabriciana  
adippe;0.987124560355947;  
KP871143;Lepidoptera;Cercyonis lupina;Hyponephele lupina;1;Hyponephele lupina;0.999999983699496;  
KP871144;Lepidoptera;Satyrium w-album;NA;0.056;Satyrium w-album;0.989378230996316;  
KP871145;Lepidoptera;Satyrus actaea;Satyrus actaea;0.002;Satyrus actaea;0.996459824853088;  
KP871146;Lepidoptera;Arethusana arethusa;Arethusana arethusa;0.018;Arethusana  
arethusa;0.999964729588135;  
KP871147;Lepidoptera;Carcharodus lavatherae;Carcharodus lavatherae;1;Carcharodus  
lavatherae;0.999958116204794;  
KP871148;Lepidoptera;Arethusana arethusa;Arethusana arethusa;0.012;Arethusana  
arethusa;0.999966518960972;  
KP871149;Lepidoptera;Lampides boeticus;Lampides boeticus;1;Lampides boeticus;0.99999999545906;  
KP871150;Lepidoptera;Anthocharis cardamines;Anthocharis cardamines;1;Anthocharis  
cardamines;0.999999988995796;  
KP871151;Lepidoptera;Thymelicus acteon;Thymelicus acteon;1;Thymelicus acteon;0.99999999752248;  
KP871152;Lepidoptera;Carcharodus alceae;Carcharodus alceae;0.001;Carcharodus  
alceae;0.999999998102538;  
KP871155;Lepidoptera;Pyrgus foulquieri;Pyrgus foulquieri;0.005;Pyrgus  
foulquieri;0.741885925757585;  
KP871156;Lepidoptera;Thymelicus sylvestris;Thymelicus sylvestris;1;Thymelicus  
sylvestris;0.999999979812401;  
KP871157;Lepidoptera;Anthocharis cardamines;Anthocharis cardamines;1;Anthocharis  
cardamines;0.999999936583011;  
KP871159;Lepidoptera;Erebia pandrose;Erebia pandrose;0.998;Erebia pandrose;0.998086832694793;  
KP871163;Lepidoptera;Melitaea diamina;NA;0.149;Melitaea diamina;0.999999996592464;  
KP871164;Lepidoptera;Erebia pronoe;Erebia pronoe;1;Erebia pronoe;0.997847273843868;  
KP871165;Lepidoptera;Coenonympha arcania;NA;0.179;Coenonympha arcania;0.96703617676693;  
KP871168;Lepidoptera;Arethusana arethusa;NA;0.062;Arethusana arethusa;0.999962489703143;  
KP871169;Lepidoptera;Gegenes nostrodamus;Gegenes nostrodamus;1;Gegenes  
nostrodamus;0.999999996883645;  
KP871170;Lepidoptera;Thymelicus sylvestris;NA;0.324;Thymelicus sylvestris;0.999940778442454;  
KP871171;Lepidoptera;Cupido minimus;NA;0.216;Cupido lorquinii;0.726278995315528;  
KP871172;Lepidoptera;Pyrgus foulquieri;Pyrgus foulquieri;0.005;Pyrgus  
foulquieri;0.741885925757585;  
KP871173;Lepidoptera;Satyrium w-album;NA;0.056;Satyrium w-album;0.989378230996316;  
KP871175;Lepidoptera;Polyommatus thersites;Polyommatus thersites;1;Polyommatus  
thersites;0.999999914332992;  
KP871178;Lepidoptera;Issoria lathonia;Issoria lathonia;1;Issoria lathonia;0.99999999962967;  
KR007004;Lepidoptera;Lysandra coridon;Lysandra coridon;NA;NA;0.988319761639796;  
KR007005;Lepidoptera;Lysandra coridon;Lysandra coridon;NA;NA;0.985116416974902;  
KR007006;Lepidoptera;Lysandra coridon;Lysandra coridon;NA;NA;0.985116416974902;  
KR007007;Lepidoptera;Lysandra coridon;Lysandra coridon;NA;NA;0.985116416974902;  
KR007008;Lepidoptera;Lysandra coridon;Lysandra coridon;NA;NA;0.985116416974902;  
KR007009;Lepidoptera;Lysandra coridon;Lysandra coridon;NA;NA;0.986430321219049;  
KR007010;Lepidoptera;Lysandra coridon;NA;NA;0.988257507033511;  
KR007011;Lepidoptera;Lysandra coridon;Lysandra coridon;NA;NA;0.986430321219049;  
KR007012;Lepidoptera;Lysandra coridon;Lysandra coridon;NA;NA;0.986430321219049;  
KR007013;Lepidoptera;Lysandra coridon;Lysandra coridon;NA;Lysandra coridon;0.758899829784951;  
KR007014;Lepidoptera;Lysandra coridon;Lysandra coridon;NA;Lysandra coridon;0.758899829784951;  
KR007015;Lepidoptera;Lysandra coridon;Lysandra coridon;NA;Lysandra coridon;0.758899829784951;  
KR007016;Lepidoptera;Lysandra coridon;Lysandra coridon;NA;Lysandra coridon;0.758899829784951;  
KR007017;Lepidoptera;Lysandra coridon;Lysandra coridon;NA;Lysandra coridon;0.758899829784951;  
KR007018;Lepidoptera;Lysandra coridon;Lysandra coridon;NA;Lysandra coridon;0.758899829784951;  
KR007019;Lepidoptera;Lysandra coridon;Lysandra coridon;NA;Lysandra coridon;0.758899829784951;  
KR007020;Lepidoptera;Lysandra coridon;Lysandra coridon;NA;Lysandra coridon;0.758899829784951;

KR007021;Lepidoptera;Lysandra coridon;Lysandra coridon;NA;Lysandra coridon;0.758899829784951;  
 KR007022;Lepidoptera;Lysandra coridon;Lysandra coridon;NA;Lysandra coridon;0.758899829784951;  
 KR007023;Lepidoptera;Lysandra coridon;Lysandra coridon;NA;Lysandra coridon;0.758899829784951;  
 KR007024;Lepidoptera;Lysandra coridon;Lysandra coridon;NA;Lysandra coridon;0.758899829784951;  
 KR007025;Lepidoptera;Lysandra coridon;Lysandra coridon;NA;Lysandra coridon;0.758899829784951;  
 KR007026;Lepidoptera;Lysandra coridon;Lysandra coridon;NA;Lysandra coridon;0.758899829784951;  
 KR007027;Lepidoptera;Lysandra coridon;Lysandra coridon;NA;Lysandra coridon;0.758899829784951;  
 KR007028;Lepidoptera;Lysandra coridon;NA;NA;NA;0.964953375329878;  
 KR007029;Lepidoptera;Lysandra coridon;NA;NA;NA;0.964953375329878;  
 KR007030;Lepidoptera;Lysandra coridon;NA;NA;NA;0.964953375329878;  
 KR007031;Lepidoptera;Lysandra coridon;NA;NA;NA;0.964953375329878;  
 KR007032;Lepidoptera;Lysandra coridon;NA;NA;NA;0.964953375329878;  
 KR007033;Lepidoptera;Lysandra coridon;NA;NA;NA;0.986461703775788;  
 KR007034;Lepidoptera;Lysandra coridon;NA;NA;NA;0.967826704628015;  
 KR007035;Lepidoptera;Lysandra coridon;NA;NA;NA;0.985885474451966;  
 KR007036;Lepidoptera;Lysandra coridon;NA;NA;NA;0.985885474451966;  
 KR007037;Lepidoptera;Lysandra coridon;NA;NA;NA;0.985885474451966;  
 KR007038;Lepidoptera;Lysandra coridon;Lysandra coridon;NA;Lysandra coridon;0.758899829784951;  
 KR007039;Lepidoptera;Lysandra coridon;Lysandra coridon;NA;Lysandra coridon;0.758899829784951;  
 KR007040;Lepidoptera;Lysandra coridon;Lysandra coridon;NA;Lysandra coridon;0.758899829784951;  
 KR007041;Lepidoptera;Lysandra coridon;Lysandra coridon;NA;Lysandra coridon;0.758899829784951;  
 KR007042;Lepidoptera;Lysandra coridon;Lysandra coridon;NA;NA;0.990151960898731;  
 KR007043;Lepidoptera;Lysandra coridon;Lysandra coridon;NA;NA;0.986672563819842;  
 KR007044;Lepidoptera;Lysandra coridon;Lysandra coridon;NA;NA;0.988779225441574;  
 KR007045;Lepidoptera;Lysandra coridon;Lysandra coridon;NA;NA;0.988779225441574;  
 KR007046;Lepidoptera;Lysandra coridon;NA;NA;NA;0.988257507033511;  
 KR007047;Lepidoptera;Lysandra coridon;NA;NA;NA;0.988257507033511;  
 KR007048;Lepidoptera;Lysandra coridon;NA;NA;NA;0.988257507033511;  
 KR007049;Lepidoptera;Lysandra coridon;NA;NA;NA;0.988257507033511;  
 KR007050;Lepidoptera;Lysandra coridon;NA;NA;NA;0.988257507033511;  
 KR007051;Lepidoptera;Lysandra coridon;NA;NA;NA;0.979138191572473;  
 KR007052;Lepidoptera;Lysandra coridon;NA;NA;NA;0.979138191572473;  
 KR007053;Lepidoptera;Lysandra coridon;NA;NA;NA;0.97847310073614;  
 KR007054;Lepidoptera;Lysandra coridon;NA;NA;NA;0.97847310073614;  
 KR007055;Lepidoptera;Lysandra coridon;NA;NA;NA;0.961243119472709;  
 KR007056;Lepidoptera;Lysandra coridon;Lysandra coridon;NA;Lysandra coridon;0.758899829784951;  
 KR007057;Lepidoptera;Lysandra coridon;Lysandra coridon;NA;Lysandra coridon;0.776897982541322;  
 KR007058;Lepidoptera;Lysandra coridon;Lysandra coridon;NA;Lysandra coridon;0.758899829784951;  
 KR007059;Lepidoptera;Lysandra coridon;Lysandra coridon;NA;Lysandra coridon;0.758899829784951;  
 KR007060;Lepidoptera;Lysandra coridon;Lysandra coridon;NA;Lysandra coridon;0.758899829784951;  
 KR007061;Lepidoptera;Lysandra coridon;NA;NA;NA;0.961243119472709;  
 KR007062;Lepidoptera;Lysandra coridon;NA;NA;NA;0.961243119472709;  
 KR007063;Lepidoptera;Lysandra coridon;NA;NA;NA;0.961243119472709;  
 KR007064;Lepidoptera;Lysandra coridon;NA;NA;NA;0.961243119472709;  
 KR007065;Lepidoptera;Lysandra coridon;NA;NA;NA;0.961243119472709;  
 KR007066;Lepidoptera;Lysandra coridon;Lysandra coridon;NA;Lysandra coridon;0.758899829784951;  
 KR007067;Lepidoptera;Lysandra coridon;Lysandra coridon;NA;Lysandra coridon;0.758899829784951;  
 KR007068;Lepidoptera;Lysandra coridon;Lysandra coridon;NA;Lysandra coridon;0.758899829784951;  
 KR007069;Lepidoptera;Lysandra coridon;Lysandra coridon;NA;NA;0.99575954286468;  
 KR007070;Lepidoptera;Lysandra coridon;Lysandra coridon;NA;Lysandra coridon;0.758899829784951;  
 KR007071;Lepidoptera;Lysandra coridon;Lysandra coridon;NA;NA;0.998374405346466;  
 KR007072;Lepidoptera;Lysandra coridon;Lysandra coridon;NA;Lysandra coridon;0.770755339120282;  
 KR007073;Lepidoptera;Lysandra coridon;Lysandra coridon;NA;Lysandra coridon;0.770755339120282;  
 KR007155;Lepidoptera;Polyommatus icarus;NA;0.139;NA;0.999999367496427;  
 KT782365;Lepidoptera;Scolitantides orion;Scolitantides orion;1;Scolitantides orion;0.999999981949031;  
 KT782419;Lepidoptera;Limenitis camilla;Limenitis camilla;0.009;Limenitis camilla;0.9999828626808;  
 KT782440;Lepidoptera;Hipparchia hermione;Hipparchia hermione;1;Hipparchia hermione;0.999791304970896;  
 KT782523;Lepidoptera;Coenonympha arcania;NA;0.067;Coenonympha arcania;0.978811371852141;  
 KT782578;Lepidoptera;Polyommatus damon;Polyommatus damon;1;Polyommatus damon;0.999999972583709;  
 KT782663;Lepidoptera;Plebejus argyrognomon;NA;0.001;NA;0.998518811781132;  
 KT782677;Lepidoptera;Thymelicus sylvestris;NA;0.042;Thymelicus sylvestris;0.9999626292829;  
 KT782725;Lepidoptera;Satyrium w-album;NA;0.056;Satyrium w-album;0.989378230996316;  
 KT792887;Lepidoptera;Melitaea britomartis;NA;0.187;Melicta britomartis;0.790714973899495;  
 KT792888;Lepidoptera;Melitaea britomartis;NA;0.19;NA;0.99999999997893;  
 KT792889;Lepidoptera;Melitaea britomartis;NA;0.498;NA;0.999999999996363;  
 KT792890;Lepidoptera;Melitaea britomartis;NA;0.496;NA;0.99999999997713;  
 KT792891;Lepidoptera;Melitaea britomartis;NA;0.498;NA;0.999999999996363;  
 KT792892;Lepidoptera;Melitaea britomartis;NA;0.175;Melicta britomartis;0.80458915409834;  
 KT792893;Lepidoptera;Melitaea britomartis;NA;0.184;Melicta britomartis;0.785539669548814;  
 KT792894;Lepidoptera;Melitaea britomartis;NA;0.19;NA;0.99999999998544;  
 KT792895;Lepidoptera;Melitaea cinxia;NA;NA;Melitaea cinxia;0.999999999987381;  
 KT792896;Lepidoptera;Melitaea cinxia;NA;0.23;Melitaea cinxia;0.999999999994742;  
 KT792897;Lepidoptera;Melitaea diamina;NA;0.327;Melitaea diamina;0.99999935406637;  
 KT792898;Lepidoptera;Melitaea didyma;Melitaea didyma;1;Melitaea didyma;0.967711726169338;  
 KT792899;Lepidoptera;Melitaea didyma;Melitaea didyma;1;Melitaea didyma;0.979298151718851;

KT792900;Lepidoptera;Melitaea didyma;Melitaea didyma;1;Melitaea didyma;0.994538950390651;  
 KT792901;Lepidoptera;Melitaea didyma;Melitaea didyma;1;Melitaea didyma;0.994159805105065;  
 KT792902;Lepidoptera;Melitaea didyma;Melitaea didyma;1;Melitaea didyma;0.988846550427704;  
 KT792903;Lepidoptera;Melitaea didyma;Melitaea didyma;1;Melitaea didyma;0.993166498245832;  
 KT792904;Lepidoptera;Melitaea didyma;Melitaea didyma;1;Melitaea didyma;0.996293536181993;  
 KT792905;Lepidoptera;Melitaea didyma;Melitaea didyma;1;Melitaea didyma;0.969595766253483;  
 KT792908;Lepidoptera;Melitaea didyma;Melitaea didyma;0.999;Melitaea didyma;0.954220159771322;  
 KT874713;Lepidoptera;Melitaea didyma;Melitaea didyma;1;Melitaea didyma;0.991123500108873;  
 KT874716;Lepidoptera;Melitaea didyma;Melitaea didyma;0.001;Melitaea didyma;0.99813805816878;  
 KT874720;Lepidoptera;Melitaea didyma;Melitaea didyma;1;Melitaea didyma;0.992165146696479;  
 KT874721;Lepidoptera;Melitaea didyma;Melitaea didyma;0.008;Melitaea didyma;0.989890661413771;  
 KT874730;Lepidoptera;Melitaea didyma;Melitaea didyma;0.995;Melitaea didyma;0.975560702519337;  
 KT874733;Lepidoptera;Melitaea didyma;Melitaea didyma;0.008;Melitaea didyma;0.989890661413771;  
 KT874743;Lepidoptera;Melitaea didyma;Melitaea didyma;0.008;Melitaea didyma;0.989890661413771;  
 KT989872;Lepidoptera;Euphydryas intermedia;Euphydryas intermedia;0.995;Euphydryas  
 intermedia;0.812587411154132;  
 KT989875;Lepidoptera;Euphydryas intermedia;NA;0.013;NA;0.999999999988838;  
 KU246383;Lepidoptera;Parnassius mnemosyne;Parnassius mnemosyne;1;NA;0.990051275615589;  
 KU246384;Lepidoptera;Parnassius mnemosyne;Parnassius mnemosyne;1;NA;0.990454591825374;  
 KU246385;Lepidoptera;Parnassius mnemosyne;Parnassius mnemosyne;1;NA;0.990454591825374;  
 KU246386;Lepidoptera;Parnassius mnemosyne;Parnassius mnemosyne;1;NA;0.989823203753365;  
 KU246387;Lepidoptera;Parnassius mnemosyne;Parnassius mnemosyne;1;NA;0.989823203753365;  
 KU246388;Lepidoptera;Parnassius mnemosyne;Parnassius mnemosyne;1;NA;0.990051275615589;  
 KU246389;Lepidoptera;Parnassius mnemosyne;Parnassius mnemosyne;0.999;NA;0.992724686477204;  
 KU246390;Lepidoptera;Parnassius mnemosyne;Parnassius mnemosyne;1;NA;0.990454591825374;  
 KU246391;Lepidoptera;Parnassius mnemosyne;Parnassius mnemosyne;1;NA;0.991415026297799;  
 KU246392;Lepidoptera;Parnassius mnemosyne;Parnassius mnemosyne;1;NA;0.990051275615589;  
 KU246393;Lepidoptera;Parnassius mnemosyne;Parnassius mnemosyne;1;NA;0.990051275615589;  
 KU246394;Lepidoptera;Parnassius mnemosyne;Parnassius mnemosyne;1;NA;0.989823203753365;  
 KU246395;Lepidoptera;Parnassius mnemosyne;Parnassius mnemosyne;1;NA;0.990051275615589;  
 KU246396;Lepidoptera;Parnassius mnemosyne;Parnassius mnemosyne;1;NA;0.990454591825374;  
 KU246397;Lepidoptera;Parnassius mnemosyne;Parnassius mnemosyne;1;NA;0.990454591825374;  
 KU246398;Lepidoptera;Parnassius mnemosyne;Parnassius mnemosyne;1;NA;0.990454591825374;  
 KU246399;Lepidoptera;Parnassius mnemosyne;Parnassius mnemosyne;1;NA;0.990454591825374;  
 KU246400;Lepidoptera;Parnassius mnemosyne;Parnassius mnemosyne;0.999;NA;0.992812218749276;  
 KU246401;Lepidoptera;Parnassius mnemosyne;Parnassius mnemosyne;1;NA;0.990051275615589;  
 KU246402;Lepidoptera;Parnassius mnemosyne;Parnassius mnemosyne;1;NA;0.990454591825374;  
 KU379779;Lepidoptera;Satyrium ilicis;Satyrium ilicis;1;Satyrium ilicis;0.999999987901305;  
 KU707843;Lepidoptera;Erebia oeme;NA;0.114;Erebia oeme;0.999999999830635;  
 KU905362;Lepidoptera;Spialia therapne;Spialia therapne;1;Spialia therapne;0.99999999437938;  
 KU905370;Lepidoptera;Spialia therapne;Spialia therapne;1;Spialia therapne;0.99999999437938;  
 KU905509;Lepidoptera;Spialia therapne;Spialia therapne;1;Spialia therapne;0.999999998225945;  
 KX011032;Lepidoptera;Fabriciana adippe;NA;NA;Fabriciana adippe;0.853915001000558;  
 KX011033;Lepidoptera;Fabriciana adippe;NA;0.006;NA;0.999999999999074;  
 KX011034;Lepidoptera;Fabriciana niobe;NA;0.002;Argynnis adippe;0.718182190495788;  
 KX011035;Lepidoptera;Fabriciana niobe;NA;0.005;Fabriciana adippe;0.814339656239357;  
 KX011036;Lepidoptera;Argynnis aglaja;NA;NA;Speyeria aglaja;0.833152886629393;  
 KX011037;Lepidoptera;Argynnis aglaja;NA;NA;Speyeria aglaja;0.83275547848188;  
 KX039986;Lepidoptera;Pyrgus alveus;NA;0.003;NA;0.999999999997732;  
 KX040002;Lepidoptera;Erynnis tages;Erynnis tages;1;Erynnis tages;0.9999999281987018;  
 KX040032;Lepidoptera;Brenthis ino;Brenthis ino;0.007;Brenthis ino;0.977157381961834;  
 KX040040;Lepidoptera;Erebia pharte;Erebia pharte;1;Erebia pharte;0.9999999630495;  
 KX040042;Lepidoptera;Erebia pandrose;Erebia pandrose;0.998;Erebia pandrose;0.997117103851311;  
 KX040049;Lepidoptera;Agriades optilete;Agriades optilete;1;Agriades optilete;0.999999991227838;  
 KX040063;Lepidoptera;Cupido minimus;NA;0.006;Cupido minimus;0.999768371759258;  
 KX040081;Lepidoptera;Parnassius mnemosyne;Parnassius mnemosyne;1;Parnassius  
 mnemosyne;0.999999584180132;  
 KX040086;Lepidoptera;Aricia artaxerxes;Plebejus argus;1;Aricia artaxerxes;0.999743187199922;  
 KX040089;Lepidoptera;Celastrina argiolus;Celastrina argiolus;1;Celastrina  
 argiolus;0.999527385150531;  
 KX040091;Lepidoptera;Pyrgus malvae;Pyrgus malvae;NA;Pyrgus malvae;0.980121140374433;  
 KX040103;Lepidoptera;Pontia callidice;Pontia callidice;1;Pontia callidice;0.999999997508183;  
 KX040111;Lepidoptera;Lycaena tityrus;Lycaena tityrus;1;Lycaena tityrus;0.999997018148077;  
 KX040121;Lepidoptera;Pyrgus alveus;NA;0.003;NA;0.999999999997732;  
 KX040126;Lepidoptera;Erebia pronoe;Erebia pronoe;1;Erebia pronoe;0.999567958198288;  
 KX040143;Lepidoptera;Aricia eumedon;Eumedonia eumedon;0.005;Eumedonia eumedon;0.997725914077716;  
 KX040149;Lepidoptera;Erebia melampus;Erebia melampus;0.014;Erebia melampus;0.970458013540357;  
 KX040169;Lepidoptera;Boloria pales;Boloria pales;0.998;Boloria pales;0.996520205418986;  
 KX040209;Lepidoptera;Pyrgus cacaliae;Pyrgus cacaliae;0.001;Pyrgus cacaliae;0.986004413030866;  
 KX040210;Lepidoptera;Erebia tyndarus;NA;NA;NA;0.99999999999885;  
 KX040220;Lepidoptera;Lycaena hippothoe;Lycaena hippothoe;NA;Lycaena hippothoe;0.943512461175779;  
 KX040221;Lepidoptera;Pyrgus alveus;NA;NA;NA;0.999999999995496;  
 KX040230;Lepidoptera;Colias phicomone;NA;0.001;Colias phicomone;0.985598879697681;  
 KX040236;Lepidoptera;Callophrys rubi;NA;0.001;Callophrys rubi;0.99870518510598;  
 KX040239;Lepidoptera;Lycaena alciphron;Lycaena alciphron;1;Lycaena alciphron;0.999999863088457;  
 KX040240;Lepidoptera;Erebia pronoe;Erebia pronoe;NA;Erebia pronoe;0.906909765449499;  
 KX040246;Lepidoptera;Lycaena dispar;Lycaena dispar;1;Lycaena dispar;0.99999987474467;  
 KX040255;Lepidoptera;Pyrgus alveus;NA;NA;Pyrgus alveus;0.827119616974978;

KX040257;Lepidoptera;Agriades orbitulus;NA;0.01;Agriades orbitulus;0.998991302227708;  
KX040261;Lepidoptera;Pyrgus alveus;NA;0.003;NA;0.99999999997732;  
KX040279;Lepidoptera;Colias palaeno;NA;0.001;NA;0.999999999982869;  
KX040280;Lepidoptera;Aricia artaxerxes;Plebejus argus;1;Aricia artaxerxes;0.999743187199922;  
KX040299;Lepidoptera;Pyrgus alveus;NA;0.003;NA;0.99999999997732;  
KX040316;Lepidoptera;Pyrgus malvae;Pyrgus malvae;NA;Pyrgus malvae;0.980121140374433;  
KX040317;Lepidoptera;Phengaris arion;NA;0.046;Phengaris arion;0.925974249765429;  
KX040345;Lepidoptera;Aricia agestis;NA;0.067;Aricia agestis;0.999509743227786;  
KX040346;Lepidoptera;Aricia artaxerxes;Plebejus argus;1;Aricia artaxerxes;0.999743187199922;  
KX040349;Lepidoptera;Agriades glandon;NA;0.002;Agriades glandon;0.987149722429845;  
KX040356;Lepidoptera;Pyrgus alveus;NA;0.003;NA;0.99999999997732;  
KX040362;Lepidoptera;Thecla betulae;Thecla betulae;1;Thecla betulae;0.99999999996561;  
KX040372;Lepidoptera;Polyommatus icarus;NA;0.13;Polyommatus icarus;0.979762695748748;  
KX040404;Lepidoptera;Pyrgus serratulae;Pyrgus serratulae;1;Pyrgus serratulae;0.99999989567508;  
KX040421;Lepidoptera;Erebia oeme;NA;0.114;Erebia oeme;0.99999999830635;  
KX040435;Lepidoptera;Callophrys rubi;NA;0.001;Callophrys rubi;0.99870518510598;  
KX040437;Lepidoptera;Erebia medusa;NA;0.004;Erebia medusa;0.98682001175274;  
KX040462;Lepidoptera;Polyommatus icarus;NA;0.003;Polyommatus icarus;0.986125651677522;  
KX040463;Lepidoptera;Erebia medusa;NA;0.01;Erebia medusa;0.979621232162315;  
KX040473;Lepidoptera;Erebia styx;NA;NA;Erebia styx;0.890739244956497;  
KX040486;Lepidoptera;Erebia pharte;Erebia pharte;1;Erebia pharte;0.9999999630495;  
KX040494;Lepidoptera;Cupido minimus;NA;0.001;Cupido minimus;0.99973296330718;  
KX040499;Lepidoptera;Pyrgus alveus;NA;NA;Pyrgus alveus;0.902591602214502;  
KX040502;Lepidoptera;Aricia artaxerxes;NA;0.5;Aricia artaxerxes;0.999618624034396;  
KX040533;Lepidoptera;Carcharodus alceae;Carcharodus alceae;1;Carcharodus alceae;0.9999999647568;  
KX040537;Lepidoptera;Erebia pharte;Erebia pharte;1;Erebia pharte;0.9999999630495;  
KX040560;Lepidoptera;Pyrgus alveus;NA;0.003;NA;0.99999999997732;  
KX040603;Lepidoptera;Erebia manto;NA;0.068;Erebia manto;0.991765428936011;  
KX040612;Lepidoptera;Hamearis lucina;NA;NA;Hamearis lucina;0.99999999984141;  
KX040614;Lepidoptera;Pyrgus alveus;NA;0.003;NA;0.99999999997732;  
KX040618;Lepidoptera;Erebia pluto;Erebia pluto;1;Erebia pluto;0.999999988858747;  
KX040619;Lepidoptera;Aricia artaxerxes;Plebejus argus;0.004;Aricia artaxerxes;0.99904771879725;  
KX040625;Lepidoptera;Erebia pronoe;Erebia pronoe;1;Erebia pronoe;0.999567958198288;  
KX040628;Lepidoptera;Phengaris arion;NA;0.054;Phengaris arion;0.938397095316026;  
KX040630;Lepidoptera;Erebia manto;Erebia manto;0.999;Erebia manto;0.999986127236517;  
KX040631;Lepidoptera;Lycaena phlaeas;Lycaena phlaeas;1;Lycaena phlaeas;0.9999999959837;  
KX040636;Lepidoptera;Aricia artaxerxes;Plebejus argus;1;Aricia artaxerxes;0.999743187199922;  
KX040643;Lepidoptera;Pyrgus alveus;NA;0.003;NA;0.99999999997732;  
KX040650;Lepidoptera;Aricia artaxerxes;Plebejus argus;1;Aricia artaxerxes;0.999743187199922;  
KX040667;Lepidoptera;Erebia styx;NA;0.123;Erebia styx;0.889337301851033;  
KX040676;Lepidoptera;Pyrgus alveus;NA;0.003;NA;0.99999999997732;  
KX040685;Lepidoptera;Pyrgus malvae;Pyrgus malvae;NA;Pyrgus malvae;0.980121140374433;  
KX040688;Lepidoptera;Pyrgus malvoides;NA;0.107;Pyrgus malvoides;0.970799101353076;  
KX040691;Lepidoptera;Pyrgus serratulae;Pyrgus serratulae;1;Pyrgus serratulae;0.99999989567508;  
KX040697;Lepidoptera;Erebia oeme;NA;0.178;Erebia oeme;0.99999999838849;  
KX040736;Lepidoptera;Coenonympha arcania;NA;0.32;Coenonympha arcania;0.715629089660113;  
KX040743;Lepidoptera;Erebia pluto;Erebia pluto;1;Erebia pluto;0.999999932368498;  
KX040759;Lepidoptera;Euphydryas maturna;NA;0.128;Euphydryas maturna;0.882179886670326;  
KX040769;Lepidoptera;Erynnis tages;Erynnis tages;1;Erynnis tages;0.999999281987018;  
KX040774;Lepidoptera;Aricia artaxerxes;Plebejus argus;1;Aricia artaxerxes;0.999743187199922;  
KX040793;Lepidoptera;Aricia eumedon;Eumedonia eumedon;0.012;Eumedonia eumedon;0.996977243476777;  
KX040833;Lepidoptera;Aricia artaxerxes;Plebejus argus;0.004;Aricia artaxerxes;0.99904771879725;  
KX040839;Lepidoptera;Hamearis lucina;NA;NA;Hamearis lucina;0.99999999984141;  
KX040846;Lepidoptera;Pyrgus alveus;NA;NA;Pyrgus alveus;0.827119616974978;  
KX040852;Lepidoptera;Aricia artaxerxes;Plebejus argus;1;Aricia artaxerxes;0.999743187199922;  
KX040861;Lepidoptera;Hipparchia semele;NA;0.002;Hipparchia semele;0.767063813608107;  
KX040863;Lepidoptera;Pyrgus alveus;NA;0.003;NA;0.99999999997732;  
KX040894;Lepidoptera;Aricia agestis;NA;0.253;Aricia agestis;0.996350017387504;  
KX040949;Lepidoptera;Pyrgus alveus;NA;NA;NA;0.99999999992155;  
KX040988;Lepidoptera;Hipparchia semele;NA;0.001;Hipparchia semele;0.862655722502182;  
KX041017;Lepidoptera;Aricia artaxerxes;Plebejus argus;1;Aricia artaxerxes;0.999743187199922;  
KX041027;Lepidoptera;Hipparchia semele;Hipparchia semele;0.001;Hipparchia semele;0.849754858703295;  
KX041037;Lepidoptera;Aricia agestis;NA;0.253;Aricia agestis;0.996350017387504;  
KX041071;Lepidoptera;Pyrgus warrenensis;NA;0.003;NA;0.9999999999828;  
KX041097;Lepidoptera;Erebia eriphyle;Erebia eriphyle;1;Erebia eriphyle;0.999999982347646;  
KX041111;Lepidoptera;Erebia eriphyle;Erebia eriphyle;1;Erebia eriphyle;0.99999983979336;  
KX041120;Lepidoptera;Erebia epiphron;NA;NA;Erebia epiphron;0.994401488812176;  
KX041140;Lepidoptera;Aricia artaxerxes;Plebejus argus;1;Aricia artaxerxes;0.999743187199922;  
KX041150;Lepidoptera;Erebia epiphron;NA;NA;Erebia epiphron;0.994401488812176;  
KX041159;Lepidoptera;Erebia eriphyle;Erebia eriphyle;1;Erebia eriphyle;0.99999992447471;  
KX041163;Lepidoptera;Erebia styx;NA;NA;Erebia styx;0.947012795007953;  
KX041171;Lepidoptera;Erebia manto;Erebia manto;0.999;Erebia manto;0.999986127236517;  
KX041219;Lepidoptera;Satyrium pruni;NA;0.076;Satyrium pruni;0.990322364021655;  
KX041293;Lepidoptera;Satyrium w-album;NA;0.056;Satyrium w-album;0.989378230996316;  
KX041493;Lepidoptera;Euphydryas maturna;NA;NA;NA;0.99999999996973;  
KX041606;Lepidoptera;Thymelicus sylvestris;NA;0.324;Thymelicus sylvestris;0.999940778442454;

KX041612;Lepidoptera;Araschnia levana;Araschnia levana;1;Araschnia levana;0.999999539033034;  
KX041617;Lepidoptera;Coenonympha arcania;NA;0.125;Coenonympha arcania;0.946375678620991;  
KX041632;Lepidoptera;Satyrium spini;Satyrium spini;1;Satyrium spini;0.999999894425036;  
KX041654;Lepidoptera;Cupido minimus;NA;0.003;Cupido minimus;0.999787792962518;  
KX041670;Lepidoptera;Arethusana arethusana;NA;NA;Arethusana arethusana;0.998746634985211;  
KX041680;Lepidoptera;Nymphalis c-album;NA;0.215;NA;0.999999192918557;  
KX041682;Lepidoptera;Celastrina argiolus;Celastrina argiolus;0.999;Celastrina  
argiolus;0.999741253489753;  
KX041730;Lepidoptera;Colias alfacariensis;Colias alfacariensis;0.001;Colias  
alfacariensis;0.999857790810452;  
KX041743;Lepidoptera;Pieris napi;NA;0.028;Pieris napi;0.888205720664699;  
KX041746;Lepidoptera;Araschnia levana;Araschnia levana;1;Araschnia levana;0.999999772187832;  
KX041748;Lepidoptera;Colias alfacariensis;Colias alfacariensis;0.001;Colias  
alfacariensis;0.999926026317526;  
KX041750;Lepidoptera;Vanessa cardui;Vanessa cardui;1;Vanessa cardui;0.999999160346886;  
KX041755;Lepidoptera;Pararge aegeria;Pararge aegeria;1;Pararge aegeria;0.999999999903309;  
KX041760;Lepidoptera;Favonius quercus;NA;NA;NA;0.99999999995578;  
KX041777;Lepidoptera;Melitaea parthenoides;Melitaea parthenoides;1;Melitaea  
parthenoides;0.999999993530452;  
KX041778;Lepidoptera;Melitaea parthenoides;Melitaea parthenoides;1;Melitaea  
parthenoides;0.999999993530452;  
KX041812;Lepidoptera;Pararge aegeria;Pararge aegeria;1;Pararge aegeria;0.999999999946255;  
KX041825;Lepidoptera;Coenonympha pamphilus;Coenonympha pamphilus;1;Coenonympha  
pamphilus;0.99999999999659;  
KX041853;Lepidoptera;Callophrys rubi;NA;0.003;Callophrys rubi;0.996753822785804;  
KX041881;Lepidoptera;Aglais urticae;NA;0.001;Aglais urticae;0.987391064814553;  
KX041927;Lepidoptera;Cupido minimus;NA;0.013;Cupido minimus;0.998077282612956;  
KX041955;Lepidoptera;Hamearis lucina;NA;NA;Hamearis lucina;0.999999999984141;  
KX041965;Lepidoptera;Hamearis lucina;NA;NA;Hamearis lucina;0.999999999982975;  
KX041968;Lepidoptera;Thymelicus sylvestris;NA;0.324;Thymelicus sylvestris;0.999940778442454;  
KX042293;Lepidoptera;Agriades glandon;Agriades glandon;0.001;Agriades glandon;0.982364968564748;  
KX042580;Lepidoptera;Erebia pandrose;NA;0.006;Erebia pandrose;0.984874134171668;  
KX043044;Lepidoptera;Favonius quercus;NA;NA;Favonius quercus;0.786853301434446;  
KX044025;Lepidoptera;Pieris napi;NA;0.011;Pieris napi;0.801985394724814;  
KX044297;Lepidoptera;Aricia agestis;NA;0.253;Aricia agestis;0.996350017387504;  
KX044305;Lepidoptera;Erebia nivalis;NA;NA;NA;0.999999999999947;  
KX044357;Lepidoptera;Pyrgus alveus;NA;NA;Pyrgus alveus;0.827119616974978;  
KX044428;Lepidoptera;Pontia callidice;Pontia callidice;1;Pontia callidice;0.999999997508183;  
KX044438;Lepidoptera;Erebia pronoe;Erebia pronoe;NA;Erebia pronoe;0.906909765449499;  
KX044496;Lepidoptera;Aricia eumedon;Eumedonia eumedon;0.003;Eumedonia eumedon;0.997225950391515;  
KX044537;Lepidoptera;Euphydryas cynthia;Euphydryas cynthia;1;Euphydryas  
cynthia;0.999999999705039;  
KX044556;Lepidoptera;Aricia artaxerxes;Plebejus argus;1;Aricia artaxerxes;0.999743187199922;  
KX044564;Lepidoptera;Erebia medusa;NA;0.008;Erebia medusa;0.980649728371849;  
KX044592;Lepidoptera;Parnassius mnemosyne;Parnassius mnemosyne;1;Parnassius  
mnemosyne;0.999999416965636;  
KX044620;Lepidoptera;Thymelicus sylvestris;Thymelicus sylvestris;1;Thymelicus  
sylvestris;0.999999985935205;  
KX044637;Lepidoptera;Pyrgus alveus;NA;NA;NA;0.99999999992155;  
KX044652;Lepidoptera;Oeneis glacialis;NA;NA;Oeneis glacialis;0.892833742436513;  
KX044653;Lepidoptera;Pyrgus alveus;Pyrgus alveus;0.001;Pyrgus alveus;0.968972839336243;  
KX044665;Lepidoptera;Pyrgus alveus;NA;NA;Pyrgus alveus;0.962152887824497;  
KX044703;Lepidoptera;Scolitantides orion;Scolitantides orion;1;Scolitantides  
orion;0.999999984804305;  
KX044717;Lepidoptera;Erebia manto;Erebia manto;0.999;Erebia manto;0.999986127236517;  
KX044818;Lepidoptera;Aricia agestis;NA;0.253;Aricia agestis;0.996350017387504;  
KX044894;Lepidoptera;Euphydryas aurinia;NA;0.001;Euphydryas aurinia;0.995576749826865;  
KX044900;Lepidoptera;Brenthis daphne;Brenthis daphne;1;Brenthis daphne;0.997257262539705;  
KX044907;Lepidoptera;Lycaena tityrus;Lycaena tityrus;1;Lycaena tityrus;0.999995729087172;  
KX044929;Lepidoptera;Pyrgus alveus;NA;0.003;NA;0.999999999997732;  
KX044940;Lepidoptera;Aricia artaxerxes;Plebejus argus;1;Aricia artaxerxes;0.999743187199922;  
KX044969;Lepidoptera;Pyrgus alveus;NA;NA;Pyrgus alveus;0.827119616974978;  
KX045038;Lepidoptera;Aricia agestis;NA;0.253;Aricia agestis;0.996350017387504;  
KX045208;Lepidoptera;Aricia agestis;NA;0.253;Aricia agestis;0.996350017387504;  
KX045217;Lepidoptera;Cupido agriades;NA;0.499;NA;0.999999999984682;  
KX045326;Lepidoptera;Agriades glandon;NA;0.002;Agriades glandon;0.987149722429845;  
KX045359;Lepidoptera;Pyrgus alveus;NA;0.003;NA;0.999999999997732;  
KX045370;Lepidoptera;Pyrgus alveus;NA;NA;Pyrgus alveus;0.827119616974978;  
KX045461;Lepidoptera;Boloria titania;Boloria titania;0.001;Boloria titania;0.99983358374111;  
KX045511;Lepidoptera;Pyrgus alveus;NA;0.003;NA;0.999999999997732;  
KX045542;Lepidoptera;Boloria pales;Boloria pales;0.998;Boloria pales;0.996520205418986;  
KX045576;Lepidoptera;Pyrgus alveus;NA;NA;NA;0.999999999995496;  
KX045675;Lepidoptera;Colias alfacariensis;Colias alfacariensis;0.998;Colias  
alfacariensis;0.999914373031199;  
KX045705;Lepidoptera;Brenthis ino;Brenthis ino;1;Brenthis ino;0.995903086085865;  
KX045718;Lepidoptera;Parnassius mnemosyne;Parnassius mnemosyne;1;Parnassius  
mnemosyne;0.999999416965636;  
KX045810;Lepidoptera;Aricia agestis;NA;0.312;Aricia agestis;0.996478252474614;

KX045814;Lepidoptera;Pyrgus alveus;NA;NA;Pyrgus alveus;0.941697735568124;  
KX045862;Lepidoptera;Colias phicomone;NA;0.001;Colias phicomone;0.985598879697681;  
KX045900;Lepidoptera;Argynnis aglaja;NA;0.001;Speyeria aglaja;0.796630797745259;  
KX045970;Lepidoptera;Agriades glandon;NA;0.002;Agriades glandon;0.987189585708506;  
KX046037;Lepidoptera;Polyommatus icarus;NA;0.13;Polyommatus icarus;0.979762695748748;  
KX046038;Lepidoptera;Agriades glandon;NA;0.014;Agriades glandon;0.988102942468088;  
KX046171;Lepidoptera;Erebia pandrose;Erebia pandrose;0.013;Erebia pandrose;0.974388092470716;  
KX046181;Lepidoptera;Lasiommata maera;Lasiommata maera;1;Lasiommata maera;0.999997752443814;  
KX046189;Lepidoptera;Lycaena dispar;Lycaena dispar;1;Lycaena dispar;0.99999990743959;  
KX046192;Lepidoptera;Pyrgus alveus;NA;NA;NA;0.99999999992155;  
KX046261;Lepidoptera;Erebia nivalis;NA;NA;NA;0.99999999999947;  
KX046268;Lepidoptera;Aricia agestis;NA;0.253;Aricia agestis;0.996350017387504;  
KX046366;Lepidoptera;Boloria pales;Boloria pales;0.001;Boloria pales;0.994313470451071;  
KX046408;Lepidoptera;Plebejus argus;Plebejus argus;0.002;Plebejus argus;0.985485404767793;  
KX046541;Lepidoptera;Agriades glandon;NA;0.002;Agriades glandon;0.987149722429845;  
KX046550;Lepidoptera;Erebia styx;NA;NA;Erebia styx;0.947012795007953;  
KX046652;Lepidoptera;Pyrgus alveus;NA;0.003;Pyrgus alveus;0.938585943089171;  
KX046734;Lepidoptera;Maniola jurtina;NA;NA;Maniola jurtina;0.710927730171155;  
KX046778;Lepidoptera;Melitaea cinxia;Melitaea cinxia;1;Melitaea cinxia;0.99999999999432;  
KX046788;Lepidoptera;Lycaena alciphron;Lycaena alciphron;1;Lycaena alciphron;0.99999768423036;  
KX046826;Lepidoptera;Aricia agestis;NA;0.253;Aricia agestis;0.996350017387504;  
KX046928;Lepidoptera;Erebia epiphron;NA;NA;Erebia epiphron;0.994401488812176;  
KX046932;Lepidoptera;Pyrgus serratulae;Pyrgus serratulae;1;Pyrgus serratulae;0.99999905727099;  
KX046955;Lepidoptera;Cyaniris semiargus;NA;NA;Cyaniris semiargus;0.999044642832579;  
KX047054;Lepidoptera;Brenthis hecate;NA;0.093;Brenthis hecate;0.999579571062591;  
KX047114;Lepidoptera;Pyrgus alveus;NA;NA;Pyrgus alveus;0.827119616974978;  
KX047207;Lepidoptera;Aricia eumedon;Eumedonia eumedon;0.004;Eumedonia eumedon;0.99844803714109;  
KX047263;Lepidoptera;Aricia artaxerxes;Plebejus argus;1;Aricia artaxerxes;0.999743187199922;  
KX047279;Lepidoptera;Melitaea diamina;NA;0.305;Melitaea diamina;0.99999994065661;  
KX047325;Lepidoptera;Pyrgus alveus;Pyrgus alveus;0.001;Pyrgus alveus;0.968972839336243;  
KX047367;Lepidoptera;Satyrium ilicis;Satyrium ilicis;1;Satyrium ilicis;0.99999987901305;  
KX047412;Lepidoptera;Pyrgus alveus;NA;NA;Pyrgus alveus;0.827119616974978;  
KX047480;Lepidoptera;Agriades glandon;NA;0.002;Agriades glandon;0.987189585708506;  
KX047625;Lepidoptera;Plebejus idas;NA;0.007;NA;0.999546324331549;  
KX047634;Lepidoptera;Cupido minimus;NA;0.01;Cupido minimus;0.999797157600087;  
KX047641;Lepidoptera;Agriades optilete;Agriades optilete;1;Agriades optilete;0.99999948697736;  
KX047652;Lepidoptera;Vanessa atalanta;Vanessa atalanta;1;Vanessa atalanta;0.99999999514898;  
KX047683;Lepidoptera;Lasiommata megera;Lasiommata megera;1;Lasiommata megera;0.999890372422668;  
KX047716;Lepidoptera;Boloria euphrosyne;Boloria euphrosyne;0.008;Boloria euphrosyne;0.999964281413411;  
KX047756;Lepidoptera;Gonepteryx rhamni;NA;0.497;Gonepteryx rhamni;0.980035687766745;  
KX047799;Lepidoptera;Cyaniris semiargus;NA;NA;Cyaniris semiargus;0.999051841766953;  
KX047808;Lepidoptera;Argynnis paphia;Argynnis paphia;1;Argynnis paphia;0.99999991067568;  
KX047828;Lepidoptera;Lycaena phlaeas;Lycaena phlaeas;1;Lycaena phlaeas;0.99999996067032;  
KX047857;Lepidoptera;Parnassius apollo;Parnassius apollo;NA;Parnassius apollo;0.99956833515036;  
KX047929;Lepidoptera;Boloria euphrosyne;Boloria euphrosyne;0.004;Boloria euphrosyne;0.9997090132607;  
KX048020;Lepidoptera;Plebejus argus;NA;0.13;Plebejus argus;0.972634369319029;  
KX048053;Lepidoptera;Lycaena virgaureae;NA;0.067;Lycaena virgaureae;0.999579233710412;  
KX048063;Lepidoptera;Boloria dia;Boloria dia;1;Boloria dia;0.99999999979764;  
KX048159;Lepidoptera;Pieris napi;NA;0.079;Pieris napi;0.829470145096553;  
KX048161;Lepidoptera;Anthocharis cardamines;Anthocharis cardamines;1;Anthocharis cardamines;0.99999940675226;  
KX048233;Lepidoptera;Parnassius mnemosyne;Parnassius mnemosyne;1;Parnassius mnemosyne;0.999999416965636;  
KX048257;Lepidoptera;Carterocephalus palaemon;NA;0.051;Carterocephalus palaemon;0.753998671629088;  
KX048275;Lepidoptera;Boloria euphrosyne;Boloria euphrosyne;0.008;Boloria euphrosyne;0.999964281413411;  
KX048399;Lepidoptera;Parnassius apollo;Parnassius apollo;NA;Parnassius apollo;0.99956833515036;  
KX048426;Lepidoptera;Agriades optilete;Agriades optilete;1;Agriades optilete;0.99999991532263;  
KX048470;Lepidoptera;Scolitantides orion;Scolitantides orion;1;Scolitantides orion;0.99999962663367;  
KX048480;Lepidoptera;Parnassius apollo;Parnassius apollo;NA;Parnassius apollo;0.99956833515036;  
KX048495;Lepidoptera;Erebia pandrose;Erebia pandrose;0.004;Erebia pandrose;0.997336976016485;  
KX048500;Lepidoptera;Parnassius apollo;Parnassius apollo;1;Parnassius apollo;0.99966565105155;  
KX048509;Lepidoptera;Scolitantides orion;Scolitantides orion;1;Scolitantides orion;0.99999962663367;  
KX048523;Lepidoptera;Lycaena tityrus;Lycaena tityrus;1;Lycaena tityrus;0.999998928238034;  
KX048601;Lepidoptera;Pieris napi;NA;NA;Pieris napi;0.954337147758801;  
KX048626;Lepidoptera;Ochlodes sylvanus;NA;0.138;Ochlodes sylvanus;0.997351494363929;  
KX048709;Lepidoptera;Cupido minimus;NA;0.009;Cupido minimus;0.999791453712643;  
KX048711;Lepidoptera;Plebejus argyrognomon;NA;0.001;NA;0.994620093546684;  
KX048776;Lepidoptera;Aricia nicias;Aricia nicias;1;Aricia nicias;0.999760056790492;  
KX048787;Lepidoptera;Colias palaeno;NA;0.002;NA;0.9999999799021;  
KX048803;Lepidoptera;Lasiommata megera;Lasiommata megera;1;Lasiommata megera;0.99989806235896;  
KX048848;Lepidoptera;Coenonympha arcania;Coenonympha arcania;0.014;Coenonympha arcania;0.986375706914077;

KX048864;Lepidoptera;Aricia eumedon;Eumedonia eumedon;0.002;Eumedonia eumedon;0.998062893323354;  
KX048905;Lepidoptera;Aphantopus hyperantus;Aphantopus hyperantus;0.002;Aphantopus  
hyperantus;0.999999300149444;  
KX048958;Lepidoptera;Scolitantides orion;Scolitantides orion;1;Scolitantides  
orion;0.999999962663367;  
KX048972;Lepidoptera;Aricia artaxerxes;Plebejus argus;1;Aricia artaxerxes;0.999743187199922;  
KX049178;Lepidoptera;Aricia eumedon;Eumedonia eumedon;1;Eumedonia eumedon;0.998306244105872;  
KX049217;Lepidoptera;Pyrgus andromedae;Pyrgus andromedae;1;Pyrgus andromedae;0.999798526295844;  
KX049222;Lepidoptera;Glaucopsyche alexis;NA;NA;Glaucopsyche alexis;0.978116759463985;  
KX049250;Lepidoptera;Melitaea cinxia;Melitaea cinxia;1;Melitaea cinxia;0.999999999999403;  
KX049293;Lepidoptera;Thymelicus sylvestris;NA;0.042;Thymelicus sylvestris;0.9999626292829;  
KX049522;Lepidoptera;Erebia pandrose;Erebia pandrose;0.004;Erebia pandrose;0.997336976016485;  
KX049579;Lepidoptera;Erebia medusa;NA;0.007;Erebia medusa;0.987140153764329;  
KX049658;Lepidoptera;Coenonympha pamphilus;Coenonympha pamphilus;1;Coenonympha  
pamphilus;0.999999999999744;  
KX049723;Lepidoptera;Lycaena phlaeas;Lycaena phlaeas;1;Lycaena phlaeas;0.999999996363186;  
KX049735;Lepidoptera;Coenonympha pamphilus;Coenonympha pamphilus;1;Coenonympha  
pamphilus;0.999999999999886;  
KX049777;Lepidoptera;Nymphalis io;NA;0.489;NA;0.99999999999788;  
KX049826;Lepidoptera;Plebejus idas;NA;0.001;NA;0.999551141554281;  
KX049843;Lepidoptera;Coenonympha pamphilus;Coenonympha pamphilus;1;Coenonympha  
pamphilus;0.999999999999886;  
KX049869;Lepidoptera;Pararge aegeria;Pararge aegeria;1;Pararge aegeria;0.999999999963165;  
KX049889;Lepidoptera;Vanessa atalanta;Vanessa atalanta;1;Vanessa atalanta;0.999999999805453;  
KX049935;Lepidoptera;Lasiommata megera;Lasiommata megera;1;Lasiommata megera;0.999890372422668;  
KX049957;Lepidoptera;Thecla betulae;Thecla betulae;1;Thecla betulae;0.999999999935426;  
KX050013;Lepidoptera;Aricia artaxerxes;Plebejus argus;1;Aricia artaxerxes;0.99976599124702;  
KX050108;Lepidoptera;Nymphalis io;NA;0.488;Aglais io;0.924256600536712;  
KX071222;Lepidoptera;Plebejus argus;NA;0.036;Plebejus argus;0.988160277018267;  
KX071243;Lepidoptera;Nymphalis c-album;NA;0.215;NA;0.999999192918557;  
KX071306;Lepidoptera;Erebia medusa;NA;0.033;Erebia medusa;0.952039959141035;  
KX071376;Lepidoptera;Pyrgus alveus;NA;NA;Pyrgus alveus;0.784892790140425;  
KX071442;Lepidoptera;Anthocharis cardamines;Anthocharis cardamines;1;Anthocharis  
cardamines;0.999999951562672;  
KX071706;Lepidoptera;Hipparchia hermione;Hipparchia hermione;1;Hipparchia  
hermione;0.999965771098254;  
KX071761;Lepidoptera;Euphydryas maturna;NA;0.126;Euphydryas maturna;0.885705216462044;  
KX071773;Lepidoptera;Nymphalis c-album;NA;0.215;NA;0.999999192918557;  
KX071814;Lepidoptera;Hipparchia hermione;NA;NA;NA;0.999999999999999;  
KX072019;Lepidoptera;Anthocharis cardamines;Anthocharis cardamines;1;Anthocharis  
cardamines;0.999999933384063;  
KX072125;Lepidoptera;Euphydryas maturna;Euphydryas maturna;1;Euphydryas  
maturna;0.893551409890867;  
KX130682;Lepidoptera;Parnassius mnemosyne;Parnassius mnemosyne;1;NA;0.982385387973762;  
KX130683;Lepidoptera;Parnassius mnemosyne;Parnassius mnemosyne;1;NA;0.980300870248416;  
KX130684;Lepidoptera;Parnassius mnemosyne;Parnassius mnemosyne;1;NA;0.978273651399484;  
KX130685;Lepidoptera;Parnassius mnemosyne;Parnassius mnemosyne;1;NA;0.888574208472778;  
KX130686;Lepidoptera;Parnassius mnemosyne;Parnassius mnemosyne;1;NA;0.980588002105575;  
KX241493;Lepidoptera;Lycaena dispar;Lycaena dispar;0.005;Lycaena dispar;0.999999999949267;  
KX241500;Lepidoptera;Euphydryas aurinia;NA;0.006;Euphydryas aurinia;0.756425138720062;  
KX241501;Lepidoptera;Euphydryas provincialis;NA;0.311;Euphydryas provincialis;0.832304786723762;  
KX241502;Lepidoptera;Euphydryas provincialis;NA;0.335;Euphydryas aurinia;0.962236452818543;  
KX241503;Lepidoptera;Euphydryas provincialis;NA;0.307;Euphydryas aurinia;0.932882591269762;  
KX277936;Lepidoptera;Erebia pronoe;Erebia pronoe;1;Erebia pronoe;0.999652510310187;  
KX277937;Lepidoptera;Erebia pronoe;Erebia pronoe;1;Erebia pronoe;0.999652510310187;  
KX277938;Lepidoptera;Erebia pronoe;Erebia pronoe;0.001;Erebia pronoe;0.999597058595386;  
KX277939;Lepidoptera;Erebia pronoe;Erebia pronoe;1;Erebia pronoe;0.999652510310187;  
KX277940;Lepidoptera;Erebia pronoe;Erebia pronoe;1;Erebia pronoe;0.999652510310187;  
KX277941;Lepidoptera;Erebia pronoe;Erebia pronoe;0.999;Erebia pronoe;0.999433014122848;  
KX277942;Lepidoptera;Erebia pronoe;Erebia pronoe;1;Erebia pronoe;0.999652510310187;  
KX277943;Lepidoptera;Erebia pronoe;Erebia pronoe;0.999;Erebia pronoe;0.999585863843868;  
KX277944;Lepidoptera;Erebia pronoe;Erebia pronoe;1;Erebia pronoe;0.999652510310187;  
KX277945;Lepidoptera;Erebia pronoe;Erebia pronoe;1;Erebia pronoe;0.999652510310187;  
KX277946;Lepidoptera;Erebia pronoe;Erebia pronoe;1;Erebia pronoe;0.999652510310187;  
KX277947;Lepidoptera;Erebia pronoe;Erebia pronoe;0.999;Erebia pronoe;0.999585863843868;  
KX277948;Lepidoptera;Erebia pronoe;Erebia pronoe;1;Erebia pronoe;0.999652510310187;  
KX277949;Lepidoptera;Erebia pronoe;Erebia pronoe;1;Erebia pronoe;0.999837399753529;  
KX277950;Lepidoptera;Erebia pronoe;Erebia pronoe;NA;Erebia pronoe;0.999498950011637;  
KX277951;Lepidoptera;Erebia pronoe;Erebia pronoe;1;Erebia pronoe;0.999813984712597;  
KX277952;Lepidoptera;Erebia pronoe;Erebia pronoe;1;Erebia pronoe;0.999828527312903;  
KX277953;Lepidoptera;Erebia pronoe;Erebia pronoe;1;Erebia pronoe;0.99991290589748;  
KX277954;Lepidoptera;Erebia pronoe;Erebia pronoe;1;Erebia pronoe;0.999868410095852;  
KX277955;Lepidoptera;Erebia pronoe;Erebia pronoe;1;Erebia pronoe;0.99942306672371;  
KX277956;Lepidoptera;Erebia pronoe;Erebia pronoe;1;Erebia pronoe;0.999902522806916;  
KX277957;Lepidoptera;Erebia pronoe;Erebia pronoe;1;Erebia pronoe;0.999851167246661;  
KX277958;Lepidoptera;Erebia pronoe;Erebia pronoe;1;Erebia pronoe;0.999807306062552;  
KX277959;Lepidoptera;Erebia pronoe;Erebia pronoe;1;Erebia pronoe;0.999914728208209;  
KX277960;Lepidoptera;Erebia pronoe;Erebia pronoe;1;Erebia pronoe;0.999607121951299;



KX277961;Lepidoptera;Erebia pronoe;Erebia pronoe;1;Erebia pronoe;0.999851167246661;  
KX277962;Lepidoptera;Erebia pronoe;Erebia pronoe;1;Erebia pronoe;0.999856083117195;  
KX377635;Lepidoptera;Polyommatus damon;Polyommatus damon;1;Polyommatus damon;0.99999794290794;  
KX951944;Lepidoptera;Polyommatus celina;NA;0.075;Polyommatus celina;0.99999999646178;  
KY000505;Lepidoptera;Satyrus ferula;Satyrus ferula;0.988;Satyrus ferula;0.993221685107162;  
KY000506;Lepidoptera;Satyrus ferula;Satyrus ferula;0.001;Satyrus ferula;0.992881646523949;  
KY000507;Lepidoptera;Satyrus ferula;NA;0.001;Satyrus ferula;0.963611208448215;  
KY000508;Lepidoptera;Satyrus ferula;NA;0.003;Satyrus ferula;0.984337909759304;  
KY000509;Lepidoptera;Satyrus ferula;Satyrus ferula;0.001;Satyrus ferula;0.993531109275661;  
KY000510;Lepidoptera;Satyrus ferula;Satyrus ferula;0.001;Satyrus ferula;0.985590051567424;  
KY000511;Lepidoptera;Satyrus ferula;NA;0.012;Satyrus ferula;0.974869552654809;  
KY000512;Lepidoptera;Satyrus ferula;Satyrus ferula;0.001;Satyrus ferula;0.988785780171169;  
KY066730;Lepidoptera;Polyommatus damon;Polyommatus damon;1;Polyommatus damon;0.99999996733564;  
KY066731;Lepidoptera;Polyommatus damon;Polyommatus damon;1;Polyommatus damon;0.999999983729595;  
KY112814;Lepidoptera;Melitaea ornata;NA;NA;NA;0.91981127253977;  
KY112815;Lepidoptera;Melitaea ornata;NA;NA;NA;0.91981127253977;  
KY112816;Lepidoptera;Melitaea ornata;NA;NA;NA;0.91981127253977;  
KY112817;Lepidoptera;Melitaea ornata;NA;NA;NA;0.91981127253977;  
KY112818;Lepidoptera;Melitaea ornata;NA;NA;NA;0.90855109807123;  
KY112819;Lepidoptera;Melitaea ornata;NA;NA;NA;0.915231925209144;  
KY112820;Lepidoptera;Melitaea ornata;NA;NA;NA;0.915231925209144;  
KY112821;Lepidoptera;Melitaea ornata;NA;NA;NA;0.91981127253977;  
KY112822;Lepidoptera;Melitaea ornata;NA;NA;NA;0.90855109807123;  
KY112823;Lepidoptera;Melitaea ornata;NA;NA;NA;0.90855109807123;  
KY112825;Lepidoptera;Melitaea ornata;NA;NA;NA;0.911459175804093;  
KY112826;Lepidoptera;Melitaea ornata;NA;NA;NA;0.916096871865532;  
KY112827;Lepidoptera;Melitaea ornata;NA;0.027;NA;0.901087625782827;  
KY112828;Lepidoptera;Melitaea ornata;NA;0.027;NA;0.901087625782827;  
KY112829;Lepidoptera;Melitaea ornata;NA;0.027;NA;0.901087625782827;  
KY112830;Lepidoptera;Melitaea ornata;NA;0.027;NA;0.901087625782827;  
KY128336;Lepidoptera;Aglais ichnusa;Aglais ichnusa;0.996;NA;0.999999994680505;  
KY128337;Lepidoptera;Nymphalis io;NA;0.487;NA;0.812507864455466;  
KY128341;Lepidoptera;Aglais urticae;Aglais urticae;0.001;Aglais nixa;0.98024379709347;  
KY128345;Lepidoptera;Nymphalis antiopa;NA;0.114;Nymphalis antiopa;0.999999904320139;  
KY128346;Lepidoptera;Nymphalis antiopa;Nymphalis antiopa;0.031;Nymphalis  
antiopa;0.999999964251004;  
KY569451;Lepidoptera;Erebia pronoe;Erebia pronoe;1;Erebia pronoe;0.999586503683627;  
KY569452;Lepidoptera;Erebia pronoe;Erebia pronoe;1;Erebia pronoe;0.999586503683627;  
KY569453;Lepidoptera;Erebia pronoe;Erebia pronoe;1;Erebia pronoe;0.999586503683627;  
KY569454;Lepidoptera;Erebia pronoe;Erebia pronoe;1;Erebia pronoe;0.999586503683627;  
KY569455;Lepidoptera;Erebia pronoe;Erebia pronoe;1;Erebia pronoe;0.999586503683627;  
KY569456;Lepidoptera;Erebia pronoe;Erebia pronoe;1;Erebia pronoe;0.999849627513594;  
KY569457;Lepidoptera;Erebia pronoe;Erebia pronoe;1;Erebia pronoe;0.999586503683627;  
KY569458;Lepidoptera;Erebia pronoe;Erebia pronoe;1;Erebia pronoe;0.999586503683627;  
LC155510;Lepidoptera;Oeneis glacialis;Oeneis glacialis;NA;NA;0.999999999999959;  
LC340450;Lepidoptera;Erebia euryale;NA;NA;Erebia euryale;0.869647226981521;  
LC340453;Lepidoptera;Erebia epiphron;NA;0.048;Erebia epiphron;0.984236140438357;  
LC340455;Lepidoptera;Erebia manto;NA;0.112;Erebia manto;0.994130514247749;  
LC340456;Lepidoptera;Erebia mnestra;Erebia mnestra;0.997;Erebia mnestra;0.999829234762559;  
LC340457;Lepidoptera;Erebia montana;Erebia montana;1;Erebia montana;0.997503353757874;  
LC340458;Lepidoptera;Erebia nivalis;NA;0.001;NA;0.999999999999821;  
LC340459;Lepidoptera;Erebia oeme;NA;0.11;Erebia oeme;0.999999999958959;  
LC340460;Lepidoptera;Erebia pharte;Erebia pharte;1;Erebia pharte;0.999999995286061;  
LC340461;Lepidoptera;Erebia pronoe;NA;NA;Erebia pronoe;0.835310357693488;  
LC340462;Lepidoptera;Erebia tyndarus;NA;0.011;NA;0.99999999999136;  
LC340463;Lepidoptera;Erebia melampus;NA;0.042;Erebia melampus;0.944389887194667;  
LC340478;Lepidoptera;Erebia euryale;NA;NA;Erebia euryale;0.869647226981521;  
LC340481;Lepidoptera;Erebia tyndarus;NA;0.001;NA;0.999999999999841;  
LC340484;Lepidoptera;Erebia neoridas;Erebia neoridas;NA;Erebia neoridas;0.994364286581965;  
LC340485;Lepidoptera;Erebia ottomana;Erebia ottomana;1;Erebia ottomana;0.999999988838795;  
LC340496;Lepidoptera;Erebia triaria;NA;0.296;NA;0.999999999999993;  
LC340498;Lepidoptera;Erebia pandrose;Erebia pandrose;0.005;Erebia pandrose;0.997196148347696;  
LC340526;Lepidoptera;Erebia pluto;Erebia pluto;1;Erebia pluto;0.999999771864933;  
LC340535;Lepidoptera;Erebia meolans;Erebia meolans;0.01;Erebia meolans;0.99940279413839;  
LC340552;Lepidoptera;Erebia styx;Erebia styx;0.002;Erebia styx;0.971927006399762;  
LC340554;Lepidoptera;Erebia pandrose;Erebia pandrose;0.005;Erebia pandrose;0.998473564469949;  
LC340559;Lepidoptera;Erebia scipio;Erebia scipio;1;Erebia scipio;0.999999992333755;  
LC340564;Lepidoptera;Erebia medusa;NA;0.012;Erebia medusa;0.970383261328537;  
LC340565;Lepidoptera;Erebia eriphyle;Erebia eriphyle;1;Erebia eriphyle;0.99999992267752;  
LC340566;Lepidoptera;Erebia stirius;NA;0.001;NA;0.999999999784577;  
LC340567;Lepidoptera;Erebia christi;Erebia christi;1;Erebia christi;0.99999999964643;  
LC471678;Lepidoptera;Anthocharis cardamines;Anthocharis cardamines;0.974;Anthocharis  
cardamines;0.999995816682112;  
LC471679;Lepidoptera;Anthocharis cardamines;Anthocharis cardamines;0.979;Anthocharis  
cardamines;0.99999858536342;  
LC471680;Lepidoptera;Anthocharis cardamines;Anthocharis cardamines;0.002;Anthocharis  
cardamines;0.999996829877341;

LC471681;Lepidoptera;Anthocharis cardamines;Anthocharis cardamines;0.001;Anthocharis cardamines;0.999991670577019;  
 LC471682;Lepidoptera;Anthocharis cardamines;NA;0.001;Anthocharis cardamines;0.999995060166591;  
 LC471683;Lepidoptera;Anthocharis cardamines;Anthocharis cardamines;0.002;Anthocharis cardamines;0.99997643130059;  
 LC471684;Lepidoptera;Anthocharis cardamines;Anthocharis cardamines;0.995;Anthocharis cardamines;0.999997328760899;  
 LC471689;Lepidoptera;Colias palaeno;NA;NA;NA;0.99999999831314;  
 LC471692;Lepidoptera;Colias palaeno;NA;NA;NA;0.99999999831314;  
 LC471701;Lepidoptera;Aglaia urticae;NA;0.001;Aglaia urticae;0.761522218140768;  
 LC471702;Lepidoptera;Aglaia urticae;NA;NA;NA;0.999999997238419;  
 LC471703;Lepidoptera;Aglaia urticae;NA;0.006;NA;0.999999998205741;  
 LC471710;Lepidoptera;Carterocephalus palaemon;NA;0.046;NA;0.99999999424184;  
 LC471711;Lepidoptera;Carterocephalus palaemon;NA;0.01;NA;0.999999993667149;  
 LC471712;Lepidoptera;Carterocephalus palaemon;Carterocephalus palaemon;0.01;Carterocephalus palaemon;0.739646793110812;  
 LC471714;Lepidoptera;Carterocephalus palaemon;NA;0.009;NA;0.999999996135473;  
 LC507810;Lepidoptera;Aporia crataegi;NA;NA;Aporia crataegi;0.998009684501193;  
 LEASS1001-17;Lepidoptera;Brenthis daphne;NA;0.183;Brenthis daphne;0.828231658877439;  
 LEASS1010-17;Lepidoptera;Melitaea phoebe;NA;0.002;Melitaea phoebe;0.809634755947941;  
 LEASS1025-17;Lepidoptera;Thecla betulae;Thecla betulae;1;Thecla betulae;0.99991876000087;  
 LEASS1031-17;Lepidoptera;Satyrium ilicis;NA;0.183;Satyrium ilicis;0.996615181211911;  
 LEASS1040-17;Lepidoptera;Polyommatus daphnis;NA;0.049;Polyommatus daphnis;0.961194861034674;  
 LEASS1041-17;Lepidoptera;Polyommatus daphnis;NA;0.049;Polyommatus daphnis;0.961194861034674;  
 LEASS537-17;Lepidoptera;Polyommatus dorylas;NA;NA;Polyommatus dorylas;0.989832543295548;  
 LEASS705-17;Lepidoptera;Carcharodus alceae;NA;NA;Carcharodus alceae;0.999941172693733;  
 LEASS890-17;Lepidoptera;Limenitis camilla;Limenitis camilla;1;Limenitis camilla;0.999906475273725;  
 LEASS905-17;Lepidoptera;Satyrium ilicis;NA;0.196;Satyrium ilicis;0.995167698244269;  
 LEASS912-17;Lepidoptera;Polyommatus amandus;Polyommatus amandus;0.023;Polyommatus amandus;0.999915179944342;  
 LEASS913-17;Lepidoptera;Polyommatus dorylas;NA;0.037;Polyommatus dorylas;0.81501858849305;  
 LEASS921-17;Lepidoptera;Carcharodus alceae;NA;NA;Carcharodus alceae;0.999969715441795;  
 LEASS965-17;Lepidoptera;Colias hyale;NA;0.003;Colias hyale;0.999739891795678;  
 LEASS979-17;Lepidoptera;Cupido argiades;NA;0.002;NA;0.999999409969707;  
 LEASS984-17;Lepidoptera;Hipparchia fagi;NA;NA;Hipparchia fagi;0.732661841087221;  
 LEASS991-17;Lepidoptera;Oeneis glacialis;Oeneis glacialis;NA;Oeneis glacialis;0.97674082091352;  
 LEATG401-14;Lepidoptera;Carcharodus lavatherae;NA;0.146;Carcharodus lavatherae;0.997727542590474;  
 LEATG422-14;Lepidoptera;Celastrina argiolus;Celastrina argiolus;NA;Celastrina argiolus;0.998081449161059;  
 LEATG430-14;Lepidoptera;Scolitantides orion;Scolitantides orion;1;Scolitantides orion;0.99999972689921;  
 LEATG450-14;Lepidoptera;Melitaea didyma;Melitaea didyma;NA;Melitaea didyma;0.997888427653926;  
 LEATG471-14;Lepidoptera;Cupido alcetas;NA;0.184;Cupido alcetas;0.836771345436072;  
 LEATG476-14;Lepidoptera;Polyommatus coridon;Polyommatus coridon;1;Polyommatus coridon;0.999999764885927;  
 LEATG481-14;Lepidoptera;Iolana iolas;Iolana iolas;1;Iolana iolas;0.999988730040341;  
 LEATG486-14;Lepidoptera;Lampides boeticus;Lampides boeticus;NA;Lampides boeticus;0.999998765013184;  
 LEATG488-14;Lepidoptera;Polyommatus thersites;NA;0.046;Polyommatus thersites;0.999993261717002;  
 LEATG509-14;Lepidoptera;Lasiommata megera;Lasiommata megera;0.019;Lasiommata megera;0.996962677013203;  
 LEATG510-14;Lepidoptera;Lasiommata megera;Lasiommata megera;0.001;Lasiommata megera;0.99561575060372;  
 LEATG528-14;Lepidoptera;Colias hyale;NA;0.103;Colias hyale;0.999989328684744;  
 LEPMT010-22;Lepidoptera;Polyommatus celina;Polyommatus celina;0.963;Polyommatus celina;0.99999960735365;  
 LEPMT011-22;Lepidoptera;Polyommatus celina;Polyommatus celina;0.002;Polyommatus celina;0.999999885384632;  
 LEPMT012-22;Lepidoptera;Polyommatus celina;Polyommatus celina;0.02;Polyommatus celina;0.99999999277776;  
 LEPMT013-22;Lepidoptera;Polyommatus celina;Polyommatus celina;0.009;Polyommatus celina;0.999999999421163;  
 LEPMT015-22;Lepidoptera;Polyommatus celina;NA;0.076;Polyommatus celina;0.999999999607354;  
 LEPMT016-22;Lepidoptera;Polyommatus celina;Polyommatus celina;0.001;Polyommatus celina;0.99999998649551;  
 LEPMT017-22;Lepidoptera;Polyommatus celina;NA;0.017;Polyommatus celina;0.999999999020844;  
 LEPMT019-22;Lepidoptera;Polyommatus celina;Polyommatus celina;0.012;Polyommatus celina;0.99999999885614;  
 LEPMT020-22;Lepidoptera;Polyommatus celina;NA;0.17;Polyommatus celina;0.99999999819812;  
 LEPMT023-22;Lepidoptera;Polyommatus celina;NA;0.004;Polyommatus celina;0.999999999006064;  
 LEPPK089-13;Lepidoptera;Apatura iris;Apatura iris;1;Apatura iris;0.99999999999744;  
 LON1068-12;Lepidoptera;Coenonympha pamphilus;Coenonympha pamphilus;1;Coenonympha pamphilus;0.99999999999886;  
 LON1079-12;Lepidoptera;Ochlodes sylvanus;NA;0.138;Ochlodes sylvanus;0.997351494363929;  
 LON1097-12;Lepidoptera;Satyrium w-album;NA;0.056;Satyrium w-album;0.989378230996316;  
 LON1107-12;Lepidoptera;Melitaea cinxia;Melitaea cinxia;1;Melitaea cinxia;0.999999999999403;

LON1124-12;Lepidoptera;Aphantopus hyperantus;Aphantopus hyperantus;0.002;Aphantopus hyperantus;0.999999300149444;  
LON1125-12;Lepidoptera;Brenthis ino;Brenthis ino;0.001;Brenthis ino;0.998434780405276;  
LON1185-14;Lepidoptera;Colias palaeno;NA;0.002;NA;0.99999999983681;  
LON1257-14;Lepidoptera;Colias palaeno;NA;0.002;NA;0.99999999983681;  
LON1313-14;Lepidoptera;Plebejus idas;NA;0.007;NA;0.999546324331549;  
LON2681-16;Lepidoptera;Parnassius apollo;Parnassius apollo;NA;Parnassius apollo;0.99956833515036;  
LON2691-16;Lepidoptera;Aglais urticae;Aglais urticae;0.001;Aglais urticae;0.994966452807995;  
LON2711-16;Lepidoptera;Coenonympha pamphilus;Coenonympha pamphilus;1;Coenonympha pamphilus;0.99999999999886;  
LON2714-16;Lepidoptera;Anthocharis cardamines;Anthocharis cardamines;1;Anthocharis cardamines;0.999999940675226;  
LON2716-16;Lepidoptera;Pieris napi;NA;0.013;Pieris napi;0.798118615202961;  
LON2740-16;Lepidoptera;Parnassius mnemosyne;Parnassius mnemosyne;1;Parnassius mnemosyne;0.999999416965636;  
LON2741-16;Lepidoptera;Parnassius apollo;Parnassius apollo;NA;Parnassius apollo;0.99956833515036;  
LON4305-16;Lepidoptera;Glaucopsyche alexis;NA;NA;Glaucopsyche alexis;0.979381169624069;  
LON4501-16;Lepidoptera;Aphantopus hyperantus;Aphantopus hyperantus;0.002;Aphantopus hyperantus;0.999999300149444;  
LON4526-16;Lepidoptera;Melitaea diamina;Melitaea diamina;0.021;Melitaea diamina;0.99999995493909;  
LON4527-16;Lepidoptera;Lasiommata maera;Lasiommata maera;1;Lasiommata maera;0.999996420657379;  
LON4528-16;Lepidoptera;Lasiommata maera;Lasiommata maera;1;Lasiommata maera;0.99999942908402;  
LON4576-16;Lepidoptera;Colias palaeno;NA;0.002;NA;0.99999999983681;  
LON4620-16;Lepidoptera;Pyrgus malvae;Pyrgus malvae;0.005;Pyrgus malvae;0.989643682630206;  
LON4624-16;Lepidoptera;Cupido minimus;NA;0.009;Cupido minimus;0.999791453712643;  
LON4628-16;Lepidoptera;Glaucopsyche alexis;NA;NA;Glaucopsyche alexis;0.979381169624069;  
LON4629-16;Lepidoptera;Argynnis aglaja;NA;NA;NA;0.99999999998051;  
LON4630-16;Lepidoptera;Boloria euphrosyne;Boloria euphrosyne;1;Boloria euphrosyne;0.999988204772551;  
LON4634-16;Lepidoptera;Aphantopus hyperantus;Aphantopus hyperantus;0.002;Aphantopus hyperantus;0.999999300149444;  
LON4635-16;Lepidoptera;Aphantopus hyperantus;Aphantopus hyperantus;0.002;Aphantopus hyperantus;0.999999300149444;  
LON5642-17;Lepidoptera;Polygonia c-album;NA;0.215;NA;0.999999192918557;  
LON5646-17;Lepidoptera;Hamearis lucina;Hamearis lucina;NA;Hamearis lucina;0.999999998835278;  
LON5647-17;Lepidoptera;Celastrina argiolus;Celastrina argiolus;1;Celastrina argiolus;0.999708846309046;  
LON5651-17;Lepidoptera;Lasiommata maera;Lasiommata maera;1;Lasiommata maera;0.99999942908402;  
LON5652-17;Lepidoptera;Lasiommata maera;Lasiommata maera;1;Lasiommata maera;0.99999942908402;  
LON5653-17;Lepidoptera;Lasiommata maera;Lasiommata maera;1;Lasiommata maera;0.99999942908402;  
LON5663-17;Lepidoptera;Argynnis aglaja;NA;0.005;NA;0.99999999994961;  
LON5664-17;Lepidoptera;Argynnis aglaja;NA;NA;NA;0.99999999998051;  
LON5668-17;Lepidoptera;Favonius quercus;NA;NA;Favonius quercus;0.73046069582187;  
LON5669-17;Lepidoptera;Favonius quercus;NA;NA;Favonius quercus;0.73046069582187;  
LON5670-17;Lepidoptera;Callophrys rubi;NA;0.007;Callophrys rubi;0.997836671768354;  
LON5671-17;Lepidoptera;Callophrys rubi;NA;0.003;Callophrys rubi;0.997328639918919;  
LON5673-17;Lepidoptera;Lycaena hippothoe;NA;NA;NA;0.999999468478795;  
LON5676-17;Lepidoptera;Limenitis populi;Limenitis populi;1;Limenitis populi;0.99999999859654;  
LON5685-17;Lepidoptera;Pyrgus malvae;Pyrgus malvae;NA;Pyrgus malvae;0.980121140374433;  
LON5686-17;Lepidoptera;Pyrgus malvae;Pyrgus malvae;NA;Pyrgus malvae;0.980121140374433;  
LON5687-17;Lepidoptera;Pyrgus malvae;Pyrgus malvae;NA;Pyrgus malvae;0.980121140374433;  
LON5688-17;Lepidoptera;Pyrgus alveus;NA;NA;Pyrgus alveus;0.922887984165083;  
LON5722-17;Lepidoptera;Colias palaeno;NA;0.002;NA;0.99999999983681;  
LON6142-17;Lepidoptera;Maniola jurtina;NA;0.038;NA;0.99999999999524;  
LON6143-17;Lepidoptera;Maniola jurtina;NA;NA;NA;0.9999999985062;  
LON6407-17;Lepidoptera;Parnassius apollo;Parnassius apollo;NA;Parnassius apollo;0.99956833515036;  
LON6412-17;Lepidoptera;Ochlodes sylvanus;NA;0.316;Ochlodes sylvanus;0.996318754838625;  
LON6413-17;Lepidoptera;Pararge aegeria;Pararge aegeria;1;Pararge aegeria;0.99999999963165;  
LON6434-17;Lepidoptera;Parnassius mnemosyne;Parnassius mnemosyne;1;Parnassius mnemosyne;0.999999416965636;  
LON6435-17;Lepidoptera;Parnassius mnemosyne;Parnassius mnemosyne;1;Parnassius mnemosyne;0.999999416965636;  
LON6575-17;Lepidoptera;Aricia artaxerxes;Plebejus argus;1;Aricia artaxerxes;0.999743187199922;  
LON6811-18;Lepidoptera;Aricia artaxerxes;Plebejus argus;1;Aricia artaxerxes;0.999743187199922;  
LON6812-18;Lepidoptera;Parnassius mnemosyne;Parnassius mnemosyne;1;Parnassius mnemosyne;0.999999416965636;  
LON6813-18;Lepidoptera;Parnassius mnemosyne;Parnassius mnemosyne;1;Parnassius mnemosyne;0.999999416965636;  
LON6827-18;Lepidoptera;Maniola jurtina;NA;NA;NA;0.9999999985062;  
LON6829-18;Lepidoptera;Maniola jurtina;NA;0.038;NA;0.99999999999524;  
LON6830-18;Lepidoptera;Maniola jurtina;NA;0.038;NA;0.99999999999524;  
LON6831-18;Lepidoptera;Maniola jurtina;NA;NA;NA;0.9999999985062;  
LON7245-18;Lepidoptera;Pyrgus malvae;Pyrgus malvae;0.999;Pyrgus malvae;0.993531783407179;  
LON7246-18;Lepidoptera;Pyrgus malvae;Pyrgus malvae;0.001;Pyrgus malvae;0.996288466450643;

LON7247-18;Lepidoptera;Pyrgus malvae;Pyrgus malvae;0.999;Pyrgus malvae;0.993531783407179;  
LON7262-18;Lepidoptera;Polyommatus amandus;Polyommatus amandus;0.007;Polyommatus  
amandus;0.999944246955852;  
LON7263-18;Lepidoptera;Melitaea cinxia;Melitaea cinxia;1;Melitaea cinxia;0.999999999999574;  
LON7264-18;Lepidoptera;Pyrgus armoricanus;Pyrgus armoricanus;1;Pyrgus  
armoricanus;0.997478680096412;  
LON7266-18;Lepidoptera;Pyrgus malvae;Pyrgus malvae;0.999;Pyrgus malvae;0.993531783407179;  
LON7267-18;Lepidoptera;Pyrgus carthami;Pyrgus carthami;1;Pyrgus carthami;0.99999339129648;  
LON7268-18;Lepidoptera;Pyrgus malvae;Pyrgus malvae;0.999;Pyrgus malvae;0.993531783407179;  
LON7271-18;Lepidoptera;Melitaea didyma;Melitaea didyma;1;Melitaea didyma;0.992165146696479;  
LON7273-18;Lepidoptera;Erebia medusa;NA;0.015;Erebia medusa;0.987529305377852;  
LOWAB166-09;Lepidoptera;Aricia artaxerxes;NA;0.069;Aricia artaxerxes;0.998975227462761;  
LOWAB167-09;Lepidoptera;Polyommatus icarus;NA;0.002;Polyommatus icarus;0.997043403297368;  
LOWAB170-09;Lepidoptera;Polyommatus damon;Polyommatus damon;1;Polyommatus  
damon;0.999999887140439;  
LOWAB171-09;Lepidoptera;Aricia artaxerxes;Aricia artaxerxes;0.013;Aricia  
artaxerxes;0.998150484524344;  
LOWAB172-09;Lepidoptera;Polyommatus damon;Polyommatus damon;1;Polyommatus  
damon;0.999999887140439;  
LOWAB173-09;Lepidoptera;Aricia artaxerxes;NA;0.069;Aricia artaxerxes;0.998975227462761;  
LOWAB176-09;Lepidoptera;Aricia artaxerxes;Aricia artaxerxes;0.017;Aricia  
artaxerxes;0.99922547145315;  
LOWAB177-09;Lepidoptera;Aricia artaxerxes;Aricia artaxerxes;0.017;Aricia  
artaxerxes;0.99922547145315;  
LOWAB180-09;Lepidoptera;Polyommatus daphnis;NA;0.033;Polyommatus daphnis;0.995567728273577;  
LOWAB182-09;Lepidoptera;Aricia artaxerxes;NA;0.069;Aricia artaxerxes;0.998975227462761;  
LOWAB183-09;Lepidoptera;Polyommatus damon;Polyommatus damon;1;Polyommatus  
damon;0.999999876500006;  
LOWAB185-09;Lepidoptera;Polyommatus daphnis;NA;0.001;Polyommatus daphnis;0.961407528082872;  
LOWAB187-09;Lepidoptera;Polyommatus daphnis;NA;0.33;Polyommatus thersites;0.999999477278829;  
LOWAB188-09;Lepidoptera;Polyommatus daphnis;Polyommatus daphnis;0.017;Polyommatus  
daphnis;0.987159579554665;  
LOWAB189-09;Lepidoptera;Polyommatus damon;Polyommatus damon;1;Polyommatus  
damon;0.999999887140439;  
LOWAB191-09;Lepidoptera;Plebejus argus;NA;0.001;NA;0.999346672923103;  
LOWAB193-09;Lepidoptera;Cyaniris semiargus;NA;NA;Cyaniris semiargus;0.999673907732824;  
LOWAB196-09;Lepidoptera;Polyommatus daphnis;Polyommatus daphnis;0.01;Polyommatus  
daphnis;0.989729743734613;  
LOWAB203-09;Lepidoptera;Polyommatus damon;Polyommatus damon;1;Polyommatus  
damon;0.999999949118207;  
LOWAB204-09;Lepidoptera;Aricia artaxerxes;NA;0.069;Aricia artaxerxes;0.998975227462761;  
LOWAB209-09;Lepidoptera;Thymelicus lineola;NA;0.324;Thymelicus sylvestris;0.999940778442454;  
LOWAB216-09;Lepidoptera;Polyommatus daphnis;Polyommatus daphnis;0.017;Polyommatus  
daphnis;0.987159579554665;  
LOWAB220-09;Lepidoptera;Polyommatus daphnis;Polyommatus daphnis;0.01;Polyommatus  
daphnis;0.989729743734613;  
LOWAB221-09;Lepidoptera;Polyommatus damon;Polyommatus damon;1;Polyommatus  
damon;0.999999947147872;  
LOWAB224-09;Lepidoptera;Polyommatus daphnis;Polyommatus daphnis;0.011;Polyommatus  
daphnis;0.952134006498833;  
LOWAB225-09;Lepidoptera;Polyommatus daphnis;Polyommatus daphnis;0.01;Polyommatus  
daphnis;0.989729743734613;  
LOWAB236-09;Lepidoptera;Issoria lathonia;Issoria lathonia;1;Issoria lathonia;0.99999999962967;  
LOWAB237-09;Lepidoptera;Arethusana arethusa;Arethusana arethusa;0.008;Arethusana  
arethusa;0.999986743724591;  
LOWAB238-09;Lepidoptera;Arethusana arethusa;Arethusana arethusa;0.008;Arethusana  
arethusa;0.999986743724591;  
LOWAB241-09;Lepidoptera;Arethusana arethusa;Arethusana arethusa;0.008;Arethusana  
arethusa;0.999986743724591;  
LOWAB273-09;Lepidoptera;Arethusana arethusa;Arethusana arethusa;0.01;Arethusana  
arethusa;0.999980185447415;  
LOWAB278-09;Lepidoptera;Argynnis paphia;Argynnis paphia;1;Argynnis paphia;0.999999977920595;  
LOWAB280-09;Lepidoptera;Lasiommata megera;Lasiommata megera;0.006;Lasiommata  
megera;0.992588117195958;  
LOWAB283-09;Lepidoptera;Aricia artaxerxes;NA;0.069;Aricia artaxerxes;0.998975227462761;  
LOWAB284-09;Lepidoptera;Aricia artaxerxes;NA;0.069;Aricia artaxerxes;0.998975227462761;  
LOWAB286-09;Lepidoptera;Thymelicus lineola;Thymelicus lineola;1;Thymelicus  
lineola;0.999948200943492;  
LOWAB287-09;Lepidoptera;Polyommatus icarus;NA;0.002;Polyommatus icarus;0.997043403297368;  
LR990102.1;Lepidoptera;Erynnis tages;Erynnis tages;1;Erynnis tages;0.999999281987018;  
LR990279.1;Lepidoptera;Aricia agestis;NA;0.081;Aricia agestis;0.998857812762894;  
LR990581.1;Lepidoptera;Vanessa atalanta;Vanessa atalanta;1;Vanessa atalanta;0.99999998834312;  
LR990920.1;Lepidoptera;Pararge aegeria;Pararge aegeria;1;Pararge aegeria;0.99999999963165;  
LR994570.1;Lepidoptera;Cyaniris semiargus;NA;NA;Cyaniris semiargus;0.999340901980295;  
LT219471;Lepidoptera;Agriades optilete;Agriades optilete;1;Agriades optilete;0.999999921887539;  
LT219472;Lepidoptera;Agriades optilete;Agriades optilete;1;Agriades optilete;0.999999964347467;  
LT219473;Lepidoptera;Agriades optilete;Agriades optilete;1;Agriades optilete;0.999999964347467;  
LT219474;Lepidoptera;Agriades optilete;Agriades optilete;1;Agriades optilete;0.999999964347467;

[illegible]

[illegible]

|             |                           |                              |                            |                           |
|-------------|---------------------------|------------------------------|----------------------------|---------------------------|
| LT219783;   | Lepidoptera; Glaucopsyche | alexis; NA; NA; Glaucopsyche | alexis; 0.965843543377355; |                           |
| LT219784;   | Lepidoptera; Glaucopsyche | alexis; NA; NA; Glaucopsyche | alexis; 0.965843543377355; |                           |
| LT219785;   | Lepidoptera; Glaucopsyche | alexis; NA; NA; Glaucopsyche | alexis; 0.965843543377355; |                           |
| LT219786;   | Lepidoptera; Glaucopsyche | alexis; NA; NA; Glaucopsyche | alexis; 0.966529405371757; |                           |
| LT219787;   | Lepidoptera; Glaucopsyche | alexis; NA; NA; Glaucopsyche | alexis; 0.977215812206823; |                           |
| LT219788;   | Lepidoptera; Glaucopsyche | alexis; NA; NA; Glaucopsyche | alexis; 0.957275461081428; |                           |
| LT219790;   | Lepidoptera; Glaucopsyche | alexis; NA; NA; Glaucopsyche | alexis; 0.968840264023661; |                           |
| LT219791;   | Lepidoptera; Glaucopsyche | alexis; NA; NA; Glaucopsyche | alexis; 0.963411140125619; |                           |
| LT219792;   | Lepidoptera; Glaucopsyche | alexis; NA; NA; Glaucopsyche | alexis; 0.963411140125619; |                           |
| LT219793;   | Lepidoptera; Glaucopsyche | alexis; NA; NA; Glaucopsyche | alexis; 0.972762900740308; |                           |
| LT219794;   | Lepidoptera; Glaucopsyche | alexis; NA; NA; Glaucopsyche | alexis; 0.972762900740308; |                           |
| LT219795;   | Lepidoptera; Glaucopsyche | alexis; NA; NA; Glaucopsyche | alexis; 0.972762900740308; |                           |
| LT219796;   | Lepidoptera; Glaucopsyche | alexis; NA; NA; Glaucopsyche | alexis; 0.972762900740308; |                           |
| LT219797;   | Lepidoptera; Glaucopsyche | alexis; NA; NA; Glaucopsyche | alexis; 0.972762900740308; |                           |
| LT219798;   | Lepidoptera; Glaucopsyche | alexis; NA; NA; Glaucopsyche | alexis; 0.972762900740308; |                           |
| LT219799;   | Lepidoptera; Glaucopsyche | alexis; NA; NA; Glaucopsyche | alexis; 0.972762900740308; |                           |
| LT219800;   | Lepidoptera; Glaucopsyche | alexis; NA; NA; Glaucopsyche | alexis; 0.972762900740308; |                           |
| LT219801;   | Lepidoptera; Glaucopsyche | alexis; NA; NA; Glaucopsyche | alexis; 0.972762900740308; |                           |
| LT219802;   | Lepidoptera; Glaucopsyche | alexis; NA; NA; Glaucopsyche | alexis; 0.972762900740308; |                           |
| LT219803;   | Lepidoptera; Glaucopsyche | alexis; NA; NA; Glaucopsyche | alexis; 0.972762900740308; |                           |
| LT219804;   | Lepidoptera; Glaucopsyche | alexis; NA; NA; Glaucopsyche | alexis; 0.972762900740308; |                           |
| LT219805;   | Lepidoptera; Glaucopsyche | alexis; NA; NA; Glaucopsyche | alexis; 0.972762900740308; |                           |
| LT219806;   | Lepidoptera; Plebejus     | argus; NA; 0.001; Plebejus   | argus; 0.964830489107857;  |                           |
| LT219807;   | Lepidoptera; Plebejus     | argus; NA; 0.037; Plebejus   | argus; 0.967686914533617;  |                           |
| LT219808;   | Lepidoptera; Plebejus     | argus; Plebejus              | argus; 0.016; Plebejus     | argus; 0.977770143991648; |
| LT219809;   | Lepidoptera; Plebejus     | argus; NA; 0.037; Plebejus   | argus; 0.967686914533617;  |                           |
| LT219810;   | Lepidoptera; Plebejus     | argus; NA; 0.037; Plebejus   | argus; 0.967686914533617;  |                           |
| LT219811;   | Lepidoptera; Plebejus     | argus; NA; 0.056; Plebejus   | argus; 0.960383357130779;  |                           |
| LT219812;   | Lepidoptera; Plebejus     | argus; NA; 0.037; Plebejus   | argus; 0.967686914533617;  |                           |
| LT219813;   | Lepidoptera; Plebejus     | argus; NA; 0.037; Plebejus   | argus; 0.967686914533617;  |                           |
| LT219814;   | Lepidoptera; Plebejus     | argus; NA; 0.001; Plebejus   | argus; 0.964830489107857;  |                           |
| LT219816;   | Lepidoptera; Plebejus     | argus; NA; 0.037; Plebejus   | argus; 0.967686914533617;  |                           |
| LT219817;   | Lepidoptera; Plebejus     | argus; NA; 0.323; Plebejus   | argus; 0.921546344013766;  |                           |
| LT219818;   | Lepidoptera; Plebejus     | argus; NA; 0.323; Plebejus   | argus; 0.921546344013766;  |                           |
| LT219819;   | Lepidoptera; Plebejus     | argus; NA; 0.323; Plebejus   | argus; 0.921546344013766;  |                           |
| LT219827;   | Lepidoptera; Plebejus     | argus; NA; 0.003; Plebejus   | argus; 0.960055152697393;  |                           |
| LT219828;   | Lepidoptera; Plebejus     | argus; NA; 0.129; Plebejus   | argus; 0.922646956033098;  |                           |
| LT219829;   | Lepidoptera; Plebejus     | argus; NA; 0.119; Plebejus   | argus; 0.948498951406236;  |                           |
| LT219830;   | Lepidoptera; Plebejus     | argus; NA; 0.162; Plebejus   | argus; 0.902098365042469;  |                           |
| LT219831;   | Lepidoptera; Plebejus     | argus; NA; 0.04; Plebejus    | argus; 0.95690508933728;   |                           |
| LT219835;   | Lepidoptera; Plebejus     | argus; NA; 0.133; Plebejus   | argus; 0.979302527358729;  |                           |
| LT219836;   | Lepidoptera; Plebejus     | argus; NA; 0.001; Plebejus   | argus; 0.964830489107857;  |                           |
| LT219837;   | Lepidoptera; Plebejus     | argus; NA; 0.323; Plebejus   | argus; 0.921546344013766;  |                           |
| LT219838;   | Lepidoptera; Plebejus     | argus; NA; 0.323; Plebejus   | argus; 0.921546344013766;  |                           |
| LT219839;   | Lepidoptera; Plebejus     | argus; NA; 0.037; Plebejus   | argus; 0.967686914533617;  |                           |
| LT219840;   | Lepidoptera; Plebejus     | argus; Plebejus              | argus; 0.01; Plebejus      | argus; 0.96041037009845;  |
| LT219841;   | Lepidoptera; Plebejus     | argus; NA; 0.037; Plebejus   | argus; 0.967686914533617;  |                           |
| LT219844;   | Lepidoptera; Plebejus     | argus; NA; 0.001; Plebejus   | argus; 0.964830489107857;  |                           |
| LT219855;   | Lepidoptera; Plebejus     | argus; NA; 0.312; Plebejus   | argus; 0.969776741393822;  |                           |
| LT219856;   | Lepidoptera; Plebejus     | argus; NA; 0.042; Plebejus   | argus; 0.948155414552817;  |                           |
| LT219857;   | Lepidoptera; Plebejus     | argus; Plebejus              | argus; 0.017; Plebejus     | argus; 0.968169272119379; |
| LT219858;   | Lepidoptera; Plebejus     | argus; NA; 0.119; Plebejus   | argus; 0.948498951406236;  |                           |
| LT219859;   | Lepidoptera; Plebejus     | argus; NA; 0.323; Plebejus   | argus; 0.921546344013766;  |                           |
| LT219860;   | Lepidoptera; Plebejus     | argus; NA; 0.119; Plebejus   | argus; 0.948498951406236;  |                           |
| LT219861;   | Lepidoptera; Plebejus     | argus; NA; 0.119; Plebejus   | argus; 0.948498951406236;  |                           |
| LT219862;</ |                           |                              |                            |                           |

LT219885;Lepidoptera;Plebejus argus;NA;0.181;Plebejus argus;0.805416086060811;  
LT219886;Lepidoptera;Plebejus argus;NA;0.109;Plebejus argus;0.978419259470235;  
LT219887;Lepidoptera;Plebejus argus;NA;0.042;Plebejus argus;0.948155414552817;  
LT219888;Lepidoptera;Plebejus argus;NA;0.042;Plebejus argus;0.948155414552817;  
LT219889;Lepidoptera;Plebejus argus;NA;0.119;Plebejus argus;0.948498951406236;  
LT219890;Lepidoptera;Plebejus argus;NA;0.119;Plebejus argus;0.948498951406236;  
LT219891;Lepidoptera;Plebejus argus;NA;0.119;Plebejus argus;0.948498951406236;  
LT219892;Lepidoptera;Plebejus argus;NA;0.042;Plebejus argus;0.948155414552817;  
LT219893;Lepidoptera;Plebejus argus;NA;0.119;Plebejus argus;0.948498951406236;  
LT219894;Lepidoptera;Plebejus argus;NA;0.323;Plebejus argus;0.921546344013766;  
LT219895;Lepidoptera;Plebejus argus;Plebejus argus;0.021;Plebejus argus;0.952241106289486;  
LT219896;Lepidoptera;Plebejus argus;NA;0.323;Plebejus argus;0.921546344013766;  
LT219897;Lepidoptera;Plebejus argus;NA;0.323;Plebejus argus;0.921546344013766;  
LT219898;Lepidoptera;Plebejus argus;NA;0.323;Plebejus argus;0.921546344013766;  
LT219899;Lepidoptera;Plebejus argus;NA;0.323;Plebejus argus;0.921546344013766;  
LT219900;Lepidoptera;Plebejus argus;NA;0.323;Plebejus argus;0.921546344013766;  
LT219901;Lepidoptera;Plebejus argus;NA;NA;Plebejus argus;0.920081658994444;  
LT219902;Lepidoptera;Plebejus argus;NA;0.323;Plebejus argus;0.921546344013766;  
LT219903;Lepidoptera;Plebejus argus;NA;0.323;Plebejus argus;0.921546344013766;  
LT219904;Lepidoptera;Plebejus argus;NA;0.048;Plebejus argus;0.941128082574131;  
LT219905;Lepidoptera;Plebejus argus;NA;NA;Plebejus argus;0.930049018367304;  
LT219906;Lepidoptera;Plebejus argus;NA;0.323;Plebejus argus;0.921546344013766;  
LT219907;Lepidoptera;Plebejus argus;NA;0.323;Plebejus argus;0.921546344013766;  
LT219908;Lepidoptera;Plebejus argus;NA;0.323;Plebejus argus;0.921546344013766;  
LT219909;Lepidoptera;Plebejus argus;NA;0.323;Plebejus argus;0.921546344013766;  
LT219910;Lepidoptera;Plebejus argus;NA;0.467;Plebejus argus;0.773467457505203;  
LT219911;Lepidoptera;Plebejus argus;NA;0.323;Plebejus argus;0.921546344013766;  
LT219912;Lepidoptera;Plebejus argus;NA;0.323;Plebejus argus;0.921546344013766;  
LT219913;Lepidoptera;Plebejus argus;NA;0.045;Plebejus argus;0.978409213421933;  
LT219914;Lepidoptera;Plebejus argus;NA;0.133;Plebejus argus;0.979302527358729;  
LT219915;Lepidoptera;Plebejus argus;NA;0.041;Plebejus argus;0.979288970293412;  
LT219916;Lepidoptera;Plebejus argus;NA;0.323;Plebejus argus;0.921546344013766;  
LT219917;Lepidoptera;Plebejus argus;NA;NA;Plebejus argus;0.92429871433038;  
LT219918;Lepidoptera;Plebejus argus;NA;NA;Plebejus argus;0.950111284998235;  
LT219919;Lepidoptera;Plebejus argus;NA;0.323;Plebejus argus;0.921546344013766;  
LT219920;Lepidoptera;Plebejus argus;NA;0.323;Plebejus argus;0.921546344013766;  
LT219921;Lepidoptera;Plebejus argus;NA;0.323;Plebejus argus;0.921546344013766;  
LT219922;Lepidoptera;Plebejus argus;NA;0.041;Plebejus argus;0.979288970293412;  
LT219923;Lepidoptera;Plebejus argus;NA;0.041;Plebejus argus;0.979288970293412;  
LT219924;Lepidoptera;Plebejus argus;NA;0.041;Plebejus argus;0.979288970293412;  
LT219925;Lepidoptera;Plebejus argus;NA;0.045;Plebejus argus;0.978409213421933;  
LT219926;Lepidoptera;Plebejus argus;NA;0.041;Plebejus argus;0.979288970293412;  
LT219927;Lepidoptera;Plebejus argus;NA;0.041;Plebejus argus;0.979288970293412;  
LT219928;Lepidoptera;Plebejus argus;NA;0.041;Plebejus argus;0.979288970293412;  
LT219929;Lepidoptera;Plebejus argus;NA;0.133;Plebejus argus;0.979302527358729;  
LT219930;Lepidoptera;Plebejus argus;Plebejus argus;0.006;Plebejus argus;0.934029408528532;  
LT219931;Lepidoptera;Plebejus argus;NA;0.119;Plebejus argus;0.948498951406236;  
LT219932;Lepidoptera;Plebejus argus;NA;0.006;Plebejus argus;0.934029408528532;  
LT219933;Lepidoptera;Plebejus argus;NA;NA;Plebejus argus;0.930049018367304;  
LT219934;Lepidoptera;Plebejus argus;NA;0.119;Plebejus argus;0.948498951406236;  
LT219935;Lepidoptera;Plebejus argus;NA;0.001;Plebejus argus;0.964830489107857;  
LT219936;Lepidoptera;Plebejus idas;NA;0.001;NA;0.998753943855449;  
LT219937;Lepidoptera;Plebejus idas;NA;0.001;NA;0.998753943855449;  
LT219938;Lepidoptera;Plebejus idas;NA;0.001;NA;0.998753943855449;  
LT219939;Lepidoptera;Plebejus idas;NA;0.001;NA;0.998753943855449;  
LT219940;Lepidoptera;Plebejus idas;NA;0.001;NA;0.998753943855449;  
LT219941;Lepidoptera;Plebejus idas;NA;0.001;NA;0.998753943855449;  
LT219942;Lepidoptera;Plebejus idas;NA;0.001;NA;0.998650809027638;  
LT219943;Lepidoptera;Plebejus idas;NA;0.001;NA;0.998650809027638;  
LT219944;Lepidoptera;Plebejus idas;NA;0.001;NA;0.997023072258307;  
LT219945;Lepidoptera;Plebejus idas;NA;0.001;NA;0.988098477943813;  
LT219946;Lepidoptera;Plebejus idas;NA;0.001;NA;0.998753943855449;  
LT219947;Lepidoptera;Plebejus idas;NA;0.001;NA;0.998753943855449;  
LT219948;Lepidoptera;Plebejus idas;NA;0.001;NA;0.998753943855449;  
LT219949;Lepidoptera;Plebejus idas;NA;0.001;NA;0.998753943855449;  
LT219950;Lepidoptera;Plebejus idas;NA;0.001;NA;0.998753943855449;  
LT219951;Lepidoptera;Plebejus idas;NA;0.004;NA;0.998911061992308;  
LT219952;Lepidoptera;Plebejus idas;NA;0.001;NA;0.998753943855449;  
LT219953;Lepidoptera;Plebejus idas;NA;0.001;NA;0.998753943855449;  
LT219954;Lepidoptera;Plebejus idas;NA;0.001;NA;0.998753943855449;  
LT219955;Lepidoptera;Plebejus idas;NA;0.001;NA;0.998753943855449;  
LT219956;Lepidoptera;Plebejus idas;NA;0.001;NA;0.997238735407381;  
LT219957;Lepidoptera;Plebejus idas;NA;0.001;NA;0.998650809027638;  
LT219958;Lepidoptera;Plebejus idas;NA;0.001;NA;0.998650809027638;  
LT219959;Lepidoptera;Plebejus idas;NA;0.001;NA;0.998753943855449;  
LT219960;Lepidoptera;Plebejus idas;NA;0.001;NA;0.998523518484146;  
LT219961;Lepidoptera;Plebejus idas;NA;0.001;NA;0.998523518484146;  
LT219962;Lepidoptera;Plebejus idas;NA;0.001;NA;0.998650809027638;



LT219963;Lepidoptera;Plebejus idas;NA;0.001;NA;0.998650809027638;  
 LT219964;Lepidoptera;Plebejus idas;NA;0.001;NA;0.998650809027638;  
 LT219965;Lepidoptera;Plebejus idas;NA;0.001;NA;0.998650809027638;  
 LT219966;Lepidoptera;Plebejus idas;NA;0.001;NA;0.998650809027638;  
 LT219967;Lepidoptera;Plebejus idas;NA;0.001;NA;0.998753943855449;  
 LT219968;Lepidoptera;Plebejus idas;NA;0.001;NA;0.998753943855449;  
 LT219969;Lepidoptera;Plebejus idas;NA;0.001;NA;0.998753943855449;  
 LT219970;Lepidoptera;Plebejus idas;NA;0.001;NA;0.998650809027638;  
 LT219971;Lepidoptera;Plebejus idas;NA;0.001;NA;0.998650809027638;  
 LT219972;Lepidoptera;Plebejus idas;NA;0.001;NA;0.998650809027638;  
 LT219973;Lepidoptera;Plebejus idas;NA;0.001;NA;0.998650809027638;  
 LT219974;Lepidoptera;Plebejus idas;NA;0.001;NA;0.998650809027638;  
 LT219975;Lepidoptera;Plebejus idas;NA;0.001;NA;0.998650809027638;  
 LT219976;Lepidoptera;Plebejus idas;NA;0.001;NA;0.998753943855449;  
 LT219977;Lepidoptera;Plebejus idas;NA;0.001;NA;0.998650809027638;  
 LT219978;Lepidoptera;Plebejus idas;NA;0.001;NA;0.998650809027638;  
 LT219979;Lepidoptera;Plebejus idas;NA;0.001;NA;0.999109895233321;  
 LT219980;Lepidoptera;Plebejus idas;NA;0.001;NA;0.998650809027638;  
 LT219981;Lepidoptera;Plebejus idas;NA;0.001;NA;0.998401268195457;  
 LT219982;Lepidoptera;Plebejus idas;NA;0.001;NA;0.998753943855449;  
 LT219983;Lepidoptera;Plebejus idas;NA;0.001;NA;0.998753943855449;  
 LT219984;Lepidoptera;Plebejus idas;NA;0.001;NA;0.998650809027638;  
 LT219985;Lepidoptera;Plebejus idas;NA;0.001;NA;0.998650809027638;  
 LT219986;Lepidoptera;Plebejus idas;NA;0.001;NA;0.998650809027638;  
 LT219987;Lepidoptera;Plebejus idas;NA;0.001;NA;0.998650809027638;  
 LT219988;Lepidoptera;Plebejus idas;NA;0.001;NA;0.998650809027638;  
 LT219989;Lepidoptera;Plebejus idas;NA;0.001;NA;0.998650809027638;  
 LT219990;Lepidoptera;Plebejus idas;NA;0.001;NA;0.998650809027638;  
 LT219991;Lepidoptera;Plebejus idas;NA;0.001;NA;0.998650809027638;  
 LT219992;Lepidoptera;Plebejus idas;NA;0.001;NA;0.998650809027638;  
 LT219993;Lepidoptera;Plebejus idas;NA;0.001;NA;0.998650809027638;  
 LT219994;Lepidoptera;Plebejus idas;NA;0.001;NA;0.998753943855449;  
 LT219995;Lepidoptera;Plebejus idas;NA;0.001;NA;0.998753943855449;  
 LT219996;Lepidoptera;Plebejus idas;NA;0.001;NA;0.998753943855449;  
 LT219997;Lepidoptera;Plebejus idas;NA;0.001;NA;0.998753943855449;  
 LT219998;Lepidoptera;Plebejus idas;NA;0.001;NA;0.998753943855449;  
 LT219999;Lepidoptera;Plebejus idas;NA;0.001;NA;0.998753943855449;  
 LT220000;Lepidoptera;Plebejus idas;NA;0.001;NA;0.998753943855449;  
 LT220001;Lepidoptera;Plebejus idas;NA;0.001;NA;0.998753943855449;  
 LT220002;Lepidoptera;Plebejus idas;NA;0.001;NA;0.998753943855449;  
 LT220003;Lepidoptera;Plebejus idas;NA;0.001;NA;0.998753943855449;  
 LT220004;Lepidoptera;Plebejus idas;NA;0.001;NA;0.998753943855449;  
 LT220005;Lepidoptera;Plebejus idas;NA;0.001;NA;0.998753943855449;  
 LT220006;Lepidoptera;Plebejus idas;NA;0.001;NA;0.998753943855449;  
 LT220007;Lepidoptera;Plebejus idas;NA;0.001;NA;0.998753943855449;  
 LT220008;Lepidoptera;Plebejus idas;NA;0.001;NA;0.998753943855449;  
 LT220009;Lepidoptera;Plebejus idas;NA;0.001;NA;0.998753943855449;  
 LT220010;Lepidoptera;Plebejus idas;NA;0.001;NA;0.998753943855449;  
 LT220011;Lepidoptera;Plebejus idas;NA;0.001;NA;0.998753943855449;  
 LT220012;Lepidoptera;Plebejus idas;NA;0.001;NA;0.998753943855449;  
 LT220013;Lepidoptera;Plebejus idas;NA;0.002;NA;0.99834166956006;  
 LT220014;Lepidoptera;Plebejus idas;NA;0.001;NA;0.998753943855449;  
 LT220015;Lepidoptera;Plebejus idas;NA;0.001;NA;0.998753943855449;  
 LT220016;Lepidoptera;Plebejus idas;NA;0.004;NA;0.998911061992308;  
 LT220017;Lepidoptera;Plebejus idas;NA;0.001;NA;0.998753943855449;  
 LT628553;Lepidoptera;Polyommatus amandus;Polyommatus amandus;0.002;Polyommatus  
 amandus;0.999970849880921;  
 LT628556;Lepidoptera;Polyommatus amandus;Polyommatus amandus;0.012;Polyommatus  
 amandus;0.999875264763331;  
 LT628804;Lepidoptera;Aricia agestis;NA;0.306;Aricia agestis;0.993846455426407;  
 LT628805;Lepidoptera;Aricia agestis;NA;0.405;Aricia agestis;0.995485315574387;  
 LT628881;Lepidoptera;Polyommatus dorylas;Polyommatus dorylas;0.002;Polyommatus  
 dorylas;0.963617055955984;  
 LT628915;Lepidoptera;Aricia agestis;NA;NA;Aricia agestis;0.996270377984369;  
 LT628916;Lepidoptera;Aricia agestis;NA;NA;Aricia agestis;0.996270377984369;  
 LT628930;Lepidoptera;Polyommatus amandus;Polyommatus amandus;1;Polyommatus  
 amandus;0.999961064788254;  
 LT628956;Lepidoptera;Polyommatus amandus;Polyommatus amandus;0.003;Polyommatus  
 amandus;0.999969356061692;  
 LT628980;Lepidoptera;Polyommatus amandus;Polyommatus amandus;0.003;Polyommatus  
 amandus;0.999969356061692;  
 LT628985;Lepidoptera;Plebejus argyrognomon;Plebejus argyrognomon;1;Plebejus  
 argyrognomon;0.938702955637604;  
 LT628986;Lepidoptera;Plebejus argyrognomon;NA;0.002;NA;0.996750582460086;  
 LT628987;Lepidoptera;Plebejus idas;NA;0.001;NA;0.988098477943813;  
 LT628993;Lepidoptera;Polyommatus daphnis;NA;0.046;Polyommatus daphnis;0.990287310655549;  
 LT628999;Lepidoptera;Plebejus argus;Plebejus argus;0.001;Plebejus argus;0.851074983745483;  
 LT629003;Lepidoptera;Aricia agestis;NA;0.091;Aricia agestis;0.998135413168303;

LT629005;Lepidoptera;Aricia agestis;NA;0.073;Aricia agestis;0.999504421887332;  
LT629009;Lepidoptera;Polyommatus icarus;NA;0.004;Polyommatus icarus;0.999481683747521;  
LT629009;Lepidoptera;Polyommatus icarus;NA;0.004;Polyommatus icarus;0.999481683747521;  
LT629010;Lepidoptera;Polyommatus icarus;NA;0.004;Polyommatus icarus;0.999481683747521;  
LT629010;Lepidoptera;Polyommatus icarus;NA;0.004;Polyommatus icarus;0.999481683747521;  
LT629016;Lepidoptera;Aricia agestis;NA;NA;Aricia agestis;0.996270377984369;  
LT629025;Lepidoptera;Aricia agestis;NA;0.073;Aricia agestis;0.999504421887332;  
LT629028;Lepidoptera;Aricia agestis;NA;0.085;Aricia agestis;0.998833911707261;  
LT629035;Lepidoptera;Polyommatus icarus;Polyommatus icarus;0.001;Polyommatus  
icarus;0.999851522482238;  
LT629035;Lepidoptera;Polyommatus icarus;Polyommatus icarus;0.001;Polyommatus  
icarus;0.999851522482238;  
LT629040;Lepidoptera;Plebejus argus;Plebejus argus;0.001;Plebejus argus;0.995411334945632;  
LT795297;Lepidoptera;Boloria selene;NA;0.42;Boloria selene;0.999996162146235;  
LT795298;Lepidoptera;Boloria selene;NA;0.42;Boloria selene;0.999996162146235;  
LT795304;Lepidoptera;Boloria selene;NA;0.044;Boloria selene;0.99999873314501;  
LT795313;Lepidoptera;Boloria selene;NA;0.166;Boloria selene;0.99999971989496;  
LT795320;Lepidoptera;Boloria selene;Boloria selene;NA;Boloria selene;0.999982457459507;  
LT795322;Lepidoptera;Boloria selene;NA;0.08;Boloria selene;0.99999988470876;  
LT795330;Lepidoptera;Boloria selene;NA;0.091;Boloria selene;0.99999914141771;  
LT795331;Lepidoptera;Boloria selene;NA;0.154;Boloria selene;0.99999949774748;  
LT795338;Lepidoptera;Boloria selene;Boloria selene;0.001;Boloria selene;0.99999992311274;  
LT986363;Lepidoptera;Pieris napi;Pieris napi;0.001;Pieris napi;0.953140558002703;  
LT986364;Lepidoptera;Pieris napi;Pieris napi;NA;Pieris napi;0.992000774048581;  
LT986365;Lepidoptera;Pieris napi;NA;NA;Pieris napi;0.96403631573689;  
LT986366;Lepidoptera;Pieris napi;NA;NA;NA;0.99999999997521;  
LT986367;Lepidoptera;Pieris napi;NA;0.001;Pieris napi;0.901941565059126;  
LT986368;Lepidoptera;Pieris napi;NA;0.007;Pieris napi;0.970875043233175;  
LT986369;Lepidoptera;Pieris napi;NA;NA;NA;0.99999999997521;  
LT986370;Lepidoptera;Pieris napi;NA;0.001;Pieris napi;0.901941565059126;  
LTOL073-06;Lepidoptera;Parnassius apollo;Parnassius apollo;1;Parnassius  
apollo;0.997639119991203;  
MBMPA022-07;Lepidoptera;Melitaea britomartis;NA;0.126;Melitaea britomartis;0.984864067137034;  
MBMPA040-07;Lepidoptera;Melitaea trivia;Melitaea trivia;1;Melitaea trivia;0.999999783021304;  
MBMPA043-07;Lepidoptera;Melitaea trivia;Melitaea trivia;1;Melitaea trivia;0.9999999977064;  
MBMPA045-07;Lepidoptera;Melitaea trivia;Melitaea trivia;1;Melitaea trivia;0.99999999977064;  
MBMPA046-07;Lepidoptera;Melitaea trivia;Melitaea trivia;1;Melitaea trivia;0.99999999977064;  
MBMPA047-07;Lepidoptera;Melitaea trivia;Melitaea trivia;1;Melitaea trivia;0.99999999977064;  
MBMPA048-07;Lepidoptera;Melitaea trivia;Melitaea trivia;1;Melitaea trivia;0.9999999977064;  
MBMPA050-07;Lepidoptera;Melitaea trivia;Melitaea trivia;1;Melitaea trivia;0.99999999977064;  
MBMPA053-07;Lepidoptera;Melitaea cinxia;Melitaea cinxia;1;Melitaea cinxia;0.99999999998977;  
MBMPA054-07;Lepidoptera;Melitaea cinxia;NA;0.279;Melitaea cinxia;0.9999999999946;  
MBMPA056-07;Lepidoptera;Melitaea trivia;Melitaea trivia;1;Melitaea trivia;0.99999999877389;  
MBMPA057-07;Lepidoptera;Melitaea trivia;Melitaea trivia;1;Melitaea trivia;0.99999999877389;  
MBMPA058-07;Lepidoptera;Melitaea trivia;Melitaea trivia;1;Melitaea trivia;0.99999999958618;  
MBMPA060-07;Lepidoptera;Melitaea trivia;Melitaea trivia;1;Melitaea trivia;0.99999999877389;  
MBMPA061-07;Lepidoptera;Melitaea trivia;Melitaea trivia;1;Melitaea trivia;0.99999999960949;  
MBMPA062-07;Lepidoptera;Melitaea trivia;Melitaea trivia;1;Melitaea trivia;0.99999999954696;  
MBMPA063-07;Lepidoptera;Melitaea trivia;Melitaea trivia;1;Melitaea trivia;0.99999999877389;  
MBMPA064-07;Lepidoptera;Melitaea trivia;Melitaea trivia;1;Melitaea trivia;0.999999988387401;  
MBMPA065-07;Lepidoptera;Melitaea trivia;Melitaea trivia;1;Melitaea trivia;0.99999999877389;  
MBMPA066-07;Lepidoptera;Melitaea trivia;Melitaea trivia;1;Melitaea trivia;0.99999999960949;  
MBMPA069-07;Lepidoptera;Melitaea trivia;Melitaea trivia;1;Melitaea trivia;0.99999999877389;  
MBMPA071-07;Lepidoptera;Melitaea trivia;Melitaea trivia;1;Melitaea trivia;0.99999999960949;  
MBMPA072-07;Lepidoptera;Melitaea trivia;Melitaea trivia;1;Melitaea trivia;0.99999999954696;  
MBMPA073-07;Lepidoptera;Melitaea cinxia;NA;0.332;Melitaea cinxia;0.99999999998522;  
MBMPA074-07;Lepidoptera;Melitaea cinxia;NA;0.324;Melitaea cinxia;0.99999999995623;  
MBMPA075-07;Lepidoptera;Melitaea cinxia;NA;0.324;Melitaea cinxia;0.99999999995623;  
MBMPA077-07;Lepidoptera;Melitaea diamina;NA;0.305;Melitaea diamina;0.99999994065661;  
MBMPA078-07;Lepidoptera;Euphydryas aurinia;NA;0.001;Euphydryas aurinia;0.995576749826865;  
MBMPA086-07;Lepidoptera;Melitaea didyma;Melitaea didyma;0.997;Melitaea didyma;0.999414231996446;  
MBMPA087-07;Lepidoptera;Melitaea didyma;NA;0.099;Melitaea didyma;0.993412069257683;  
MBMPA088-07;Lepidoptera;Melitaea didyma;Melitaea didyma;0.012;Melitaea didyma;0.99169844491886;  
MBMPA089-07;Lepidoptera;Melitaea didyma;Melitaea didyma;0.014;Melitaea didyma;0.999112787489864;  
MBMPA090-07;Lepidoptera;Melitaea didyma;Melitaea didyma;0.014;Melitaea didyma;0.999112787489864;  
MBMPA091-07;Lepidoptera;Melitaea didyma;Melitaea didyma;0.014;Melitaea didyma;0.999112787489864;  
MBMPA092-07;Lepidoptera;Melitaea didyma;Melitaea didyma;0.003;Melitaea didyma;0.999170363401737;  
MBMPA093-07;Lepidoptera;Melitaea didyma;Melitaea didyma;0.014;Melitaea didyma;0.999112787489864;  
MBMPA094-07;Lepidoptera;Melitaea didyma;Melitaea didyma;0.006;Melitaea didyma;0.998866265822718;  
MBMPA158-07;Lepidoptera;Melitaea diamina;NA;0.305;Melitaea diamina;0.999999994065661;  
MBMPA159-07;Lepidoptera;Melitaea diamina;NA;0.305;Melitaea diamina;0.999999994065661;  
MBMPA160-07;Lepidoptera;Melitaea diamina;NA;0.305;Melitaea diamina;0.999999994065661;  
MBMPA171-07;Lepidoptera;Melitaea britomartis;NA;NA;Melitaea britomartis;0.985732804805908;  
MBMPA209-09;Lepidoptera;Melitaea britomartis;Melitaea britomartis;1;Melitaea  
britomartis;0.999407726535082;  
MBMPA210-09;Lepidoptera;Melitaea britomartis;Melitaea britomartis;1;Melitaea  
britomartis;0.999407726535082;

MBMPA211-09;Lepidoptera;Melitaea britomartis;Melitaea britomartis;1;Melitaea  
britomartis;0.999407726535082;  
MBMPA212-09;Lepidoptera;Melitaea britomartis;Melitaea britomartis;1;Melitaea  
britomartis;0.999407726535082;  
MBMPA213-09;Lepidoptera;Melitaea britomartis;Melitaea britomartis;1;Melitaea  
britomartis;0.999407726535082;  
MBMPA214-09;Lepidoptera;Melitaea britomartis;Melitaea britomartis;1;Melitaea  
britomartis;0.999407726535082;  
MBMPA215-09;Lepidoptera;Melitaea britomartis;NA;NA;Melitaea britomartis;0.981389105125501;  
MBMPA216-09;Lepidoptera;Melitaea britomartis;Mellicta britomartis;1;Melitaea  
britomartis;0.921480340185081;  
MBMPA217-09;Lepidoptera;Melitaea britomartis;Melitaea britomartis;1;Melitaea  
britomartis;0.999407726535082;  
MBMPA270-09;Lepidoptera;Melitaea cinxia;NA;0.32;Melitaea cinxia;0.99999999998977;  
MBMPA271-09;Lepidoptera;Melitaea cinxia;NA;0.302;Melitaea arduinna;0.999997657342691;  
MBMPA272-09;Lepidoptera;Melitaea cinxia;NA;0.066;Melitaea cinxia;0.99999999998977;  
MBMPA273-09;Lepidoptera;Melitaea cinxia;NA;0.112;Melitaea cinxia;0.99999999998352;  
MF458657;Lepidoptera;Coenonympha oedippus;Coenonympha oedippus;1;Coenonympha  
oedippus;0.999999999999915;  
MF458658;Lepidoptera;Coenonympha oedippus;Coenonympha oedippus;1;Coenonympha  
oedippus;0.999999999999915;  
MF458706;Lepidoptera;Euphydryas aurinia;Euphydryas aurinia;0.021;Euphydryas  
aurinia;0.99523814349476;  
MG521930;Lepidoptera;Boloria titania;Boloria titania;0.001;Boloria titania;0.99983358374111;  
MG521935;Lepidoptera;Lycaena virgaureae;NA;0.186;Lycaena virgaureae;0.999491227342155;  
MG521937;Lepidoptera;Cupido minimus;NA;0.003;Cupido minimus;0.999853615233319;  
MG521946;Lepidoptera;Cyaniris semiargus;Cyaniris semiargus;NA;Cyaniris  
semiargus;0.999858415559969;  
MG521962;Lepidoptera;Cupido minimus;NA;0.009;Cupido minimus;0.999791453712643;  
MG521992;Lepidoptera;Cupido minimus;NA;0.009;Cupido minimus;0.999791453712643;  
MG522001;Lepidoptera;Lycaena virgaureae;NA;0.076;Lycaena virgaureae;0.999570679451439;  
MG522002;Lepidoptera;Boloria dia;Boloria dia;1;Boloria dia;0.999999999930935;  
MG522003;Lepidoptera;Lycaena virgaureae;NA;0.186;Lycaena virgaureae;0.999491227342155;  
MG522029;Lepidoptera;Cupido minimus;NA;0.005;Cupido minimus;0.999638915488394;  
MG522062;Lepidoptera;Boloria titania;Boloria titania;1;Boloria titania;0.999891597397718;  
MG522081;Lepidoptera;Cyaniris semiargus;NA;NA;Cyaniris semiargus;0.999051841766953;  
MG522099;Lepidoptera;Brenthis ino;Brenthis ino;0.004;Brenthis ino;0.988611064611184;  
MG522124;Lepidoptera;Cyaniris semiargus;NA;NA;Cyaniris semiargus;0.999051841766953;  
MG522137;Lepidoptera;Pontia callidice;NA;0.065;Pontia callidice;0.997856462024924;  
MG522142;Lepidoptera;Aricia eumedon;Eumedonia eumedon;0.002;Eumedonia eumedon;0.998285932369328;  
MG522147;Lepidoptera;Aricia eumedon;Eumedonia eumedon;0.03;Eumedonia eumedon;0.973536015583616;  
MG522150;Lepidoptera;Coenonympha glycerion;NA;0.153;Coenonympha glycerion;0.999998511579803;  
MG522157;Lepidoptera;Cupido minimus;NA;0.001;Cupido minimus;0.982773593972912;  
MG522171;Lepidoptera;Aricia eumedon;Eumedonia eumedon;0.002;Eumedonia eumedon;0.997595421160923;  
MG522178;Lepidoptera;Cupido minimus;NA;0.009;Cupido minimus;0.999791453712643;  
MG522192;Lepidoptera;Coenonympha glycerion;NA;0.295;Coenonympha glycerion;0.999998958157621;  
MG522195;Lepidoptera;Lycaena virgaureae;NA;0.069;Lycaena virgaureae;0.999558016312736;  
MG522204;Lepidoptera;Pontia callidice;Pontia callidice;1;Pontia callidice;0.999999999870283;  
MG522224;Lepidoptera;Boloria dia;Boloria dia;1;Boloria dia;0.999999999948301;  
MG522227;Lepidoptera;Coenonympha glycerion;NA;0.264;Coenonympha glycerion;0.999998370144304;  
MG522242;Lepidoptera;Pontia callidice;Pontia callidice;1;Pontia callidice;0.9999999919703;  
MG522253;Lepidoptera;Cupido minimus;NA;0.009;Cupido minimus;0.999791453712643;  
MG522254;Lepidoptera;Boloria titania;Boloria titania;0.001;Boloria titania;0.99983358374111;  
MG522260;Lepidoptera;Aricia eumedon;Eumedonia eumedon;0.006;Eumedonia eumedon;0.996647121119569;  
MG522268;Lepidoptera;Cupido minimus;NA;0.006;Cupido minimus;0.999768371759258;  
MG522277;Lepidoptera;Cupido minimus;NA;0.001;Cupido minimus;0.999828420231565;  
MG522291;Lepidoptera;Cyaniris semiargus;NA;NA;Cyaniris semiargus;0.999051841766953;  
MG522295;Lepidoptera;Cupido minimus;NA;0.009;Cupido minimus;0.999791453712643;  
MG522299;Lepidoptera;Aricia eumedon;NA;0.202;Eumedonia eumedon;0.785331104416398;  
MG522314;Lepidoptera;Coenonympha glycerion;NA;0.264;Coenonympha glycerion;0.999998370144304;  
MG522336;Lepidoptera;Boloria dia;Boloria dia;1;Boloria dia;0.999999999980503;  
MG522342;Lepidoptera;Aricia eumedon;NA;0.497;Eumedonia eumedon;0.726749102481048;  
MG522351;Lepidoptera;Cupido minimus;NA;0.004;Cupido minimus;0.99987402211542;  
MG522352;Lepidoptera;Lycaena virgaureae;NA;0.186;Lycaena virgaureae;0.999491227342155;  
MG522365;Lepidoptera;Cupido minimus;NA;0.003;Cupido minimus;0.99967591695379;  
MG522374;Lepidoptera;Boloria dia;Boloria dia;1;Boloria dia;0.999999999980503;  
MG522376;Lepidoptera;Boloria titania;Boloria titania;0.999;Boloria titania;0.999431261609546;  
MG522386;Lepidoptera;Coenonympha glycerion;NA;0.295;Coenonympha glycerion;0.999998958157621;  
MG522392;Lepidoptera;Boloria titania;NA;0.075;Boloria chariclea;0.875902760689287;  
MG522398;Lepidoptera;Pontia callidice;Pontia callidice;1;Pontia callidice;0.999999997508183;  
MG522399;Lepidoptera;Lycaena virgaureae;NA;0.073;Lycaena virgaureae;0.9995563158025;  
MG522431;Lepidoptera;Lycaena virgaureae;NA;0.115;Lycaena virgaureae;0.999471885087677;  
MG522453;Lepidoptera;Brenthis ino;Brenthis ino;0.001;Brenthis ino;0.989101365668547;  
MG522456;Lepidoptera;Cupido minimus;NA;0.002;Cupido minimus;0.999824438611123;  
MG522461;Lepidoptera;Cupido minimus;NA;0.006;Cupido minimus;0.999768371759258;  
MG522492;Lepidoptera;Lycaena virgaureae;NA;0.076;Lycaena virgaureae;0.999570679451439;  
MG522502;Lepidoptera;Boloria titania;NA;0.075;Boloria chariclea;0.875902760689287;  
MG522518;Lepidoptera;Boloria dia;Boloria dia;1;Boloria dia;0.999999999980503;

MG522538;Lepidoptera;Cupido minimus;NA;0.006;Cupido minimus;0.999768371759258;  
MG522545;Lepidoptera;Aricia eumedon;NA;0.497;Eumedonia eumedon;0.726749102481048;  
MG522551;Lepidoptera;Cupido minimus;NA;0.009;Cupido minimus;0.999791453712643;  
MG522564;Lepidoptera;Brenthis ino;NA;0.031;Brenthis ino;0.796814350318661;  
MG522583;Lepidoptera;Lycaena virgaureae;NA;0.186;Lycaena virgaureae;0.999491227342155;  
MG522584;Lepidoptera;Lycaena virgaureae;NA;0.186;Lycaena virgaureae;0.999491227342155;  
MG522589;Lepidoptera;Lycaena virgaureae;NA;0.186;Lycaena virgaureae;0.999491227342155;  
MG522603;Lepidoptera;Cupido minimus;NA;0.006;Cupido minimus;0.999768371759258;  
MG522604;Lepidoptera;Boloria titania;NA;0.075;Boloria chariclea;0.875902760689287;  
MG522609;Lepidoptera;Brenthis ino;Brenthis ino;0.001;Brenthis ino;0.994711912827522;  
MG522621;Lepidoptera;Brenthis ino;Brenthis ino;0.007;Brenthis ino;0.977157381961834;  
MG522629;Lepidoptera;Brenthis ino;Brenthis ino;0.001;Brenthis ino;0.998434780405276;  
MG522639;Lepidoptera;Lycaena virgaureae;NA;0.217;Lycaena virgaureae;0.999511105136248;  
MG522654;Lepidoptera;Aricia eumedon;Eumedonia eumedon;0.003;Eumedonia eumedon;0.997225950391515;  
MG522679;Lepidoptera;Brenthis ino;Brenthis ino;0.007;Brenthis ino;0.977157381961834;  
MG522697;Lepidoptera;Boloria titania;Boloria titania;0.001;Boloria titania;0.99983358374111;  
MG522700;Lepidoptera;Aricia eumedon;Eumedonia eumedon;0.002;Eumedonia eumedon;0.997595421160923;  
MG522702;Lepidoptera;Boloria dia;Boloria dia;l;Boloria dia;0.99999999980503;  
MG522707;Lepidoptera;Brenthis ino;Brenthis ino;0.001;Brenthis ino;0.994711912827522;  
MG522711;Lepidoptera;Lycaena virgaureae;NA;0.186;Lycaena virgaureae;0.999491227342155;  
MG522721;Lepidoptera;Aricia eumedon;Eumedonia eumedon;0.003;Eumedonia eumedon;0.999165302110657;  
MG522726;Lepidoptera;Brenthis ino;Brenthis ino;0.001;Brenthis ino;0.994711912827522;  
MG522727;Lepidoptera;Coenonympha glycerion;NA;0.295;Coenonympha glycerion;0.99998958157621;  
MG522744;Lepidoptera;Boloria dia;Boloria dia;l;Boloria dia;0.99999999980503;  
MG522770;Lepidoptera;Lycaena virgaureae;NA;0.073;Lycaena virgaureae;0.9995563158025;  
MG522785;Lepidoptera;Pontia callidice;Pontia callidice;l;Pontia callidice;0.999999997508183;  
MG522806;Lepidoptera;Brenthis ino;Brenthis ino;0.001;Brenthis ino;0.994711912827522;  
MG522815;Lepidoptera;Boloria dia;Boloria dia;l;Boloria dia;0.99999999980503;  
MG522825;Lepidoptera;Lycaena virgaureae;NA;0.186;Lycaena virgaureae;0.999491227342155;  
MG675184;Lepidoptera;Euphydryas aurinia;Euphydryas aurinia;0.023;Euphydryas  
aurinia;0.99260940098197;  
MG675185;Lepidoptera;Euphydryas aurinia;Euphydryas aurinia;0.023;Euphydryas  
aurinia;0.99260940098197;  
MG675186;Lepidoptera;Euphydryas aurinia;Euphydryas aurinia;0.023;Euphydryas  
aurinia;0.99260940098197;  
MG675187;Lepidoptera;Euphydryas aurinia;NA;0.002;Euphydryas aurinia;0.962966658044978;  
MG675189;Lepidoptera;Euphydryas aurinia;NA;0.002;Euphydryas aurinia;0.962966658044978;  
MG675207;Lepidoptera;Euphydryas aurinia;NA;0.002;Euphydryas aurinia;0.962966658044978;  
MG675208;Lepidoptera;Euphydryas aurinia;NA;0.002;Euphydryas aurinia;0.962966658044978;  
MG675209;Lepidoptera;Euphydryas aurinia;NA;0.002;Euphydryas aurinia;0.962966658044978;  
MG675210;Lepidoptera;Euphydryas aurinia;NA;0.002;Euphydryas aurinia;0.962966658044978;  
MG675211;Lepidoptera;Euphydryas aurinia;NA;0.002;Euphydryas aurinia;0.976250031560894;  
MG675212;Lepidoptera;Euphydryas aurinia;NA;0.002;Euphydryas aurinia;0.962966658044978;  
MG675213;Lepidoptera;Euphydryas aurinia;NA;0.002;Euphydryas aurinia;0.962966658044978;  
MG675214;Lepidoptera;Euphydryas aurinia;NA;0.138;Euphydryas aurinia;0.984163691779491;  
MG675215;Lepidoptera;Euphydryas aurinia;NA;0.002;Euphydryas aurinia;0.976250031560894;  
MG675216;Lepidoptera;Euphydryas aurinia;NA;0.002;Euphydryas aurinia;0.976250031560894;  
MG675217;Lepidoptera;Euphydryas aurinia;NA;0.002;Euphydryas aurinia;0.976250031560894;  
MG675218;Lepidoptera;Euphydryas aurinia;NA;0.002;Euphydryas aurinia;0.976250031560894;  
MH089587;Lepidoptera;Pararge aegeria;Pararge aegeria;l;Pararge aegeria;0.999999999963165;  
MH089588;Lepidoptera;Pararge aegeria;Pararge aegeria;l;Pararge aegeria;0.999999999963165;  
MH089589;Lepidoptera;Pararge aegeria;Pararge aegeria;l;Pararge aegeria;0.999999999963165;  
MH089590;Lepidoptera;Pararge aegeria;Pararge aegeria;l;Pararge aegeria;0.999999999963165;  
MH089591;Lepidoptera;Pararge aegeria;Pararge aegeria;l;Pararge aegeria;0.999999999963165;  
MH089592;Lepidoptera;Pararge aegeria;Pararge aegeria;l;Pararge aegeria;0.999999999963165;  
MH089593;Lepidoptera;Pararge aegeria;Pararge aegeria;l;Pararge aegeria;0.99999999975955;  
MH089594;Lepidoptera;Pararge aegeria;Pararge aegeria;l;Pararge aegeria;0.99999998847642;  
MH089595;Lepidoptera;Pararge aegeria;Pararge aegeria;l;Pararge aegeria;0.999999999963165;  
MH089596;Lepidoptera;Pararge aegeria;Pararge aegeria;l;Pararge aegeria;0.999999999963165;  
MH089597;Lepidoptera;Pararge aegeria;Pararge aegeria;l;Pararge aegeria;0.999999999836319;  
MH089598;Lepidoptera;Pararge aegeria;Pararge aegeria;l;Pararge aegeria;0.99999999365514;  
MH089599;Lepidoptera;Pararge aegeria;Pararge aegeria;l;Pararge aegeria;0.999999970113123;  
MH089600;Lepidoptera;Pararge aegeria;Pararge aegeria;l;Pararge aegeria;0.999999999963165;  
MH089601;Lepidoptera;Pararge aegeria;Pararge aegeria;l;Pararge aegeria;0.999999999963165;  
MH089602;Lepidoptera;Pararge aegeria;Pararge aegeria;l;Pararge aegeria;0.99999999932498;  
MH089604;Lepidoptera;Pararge aegeria;Pararge aegeria;l;Pararge aegeria;0.999999999963165;  
MH089605;Lepidoptera;Pararge aegeria;Pararge aegeria;l;Pararge aegeria;0.999999999963165;  
MH089606;Lepidoptera;Pararge aegeria;Pararge aegeria;l;Pararge aegeria;0.999999999963165;  
MH089608;Lepidoptera;Pararge aegeria;Pararge aegeria;l;Pararge aegeria;0.9999999997371;  
MH089609;Lepidoptera;Pararge aegeria;Pararge aegeria;l;Pararge aegeria;0.999999999963165;  
MH089610;Lepidoptera;Pararge aegeria;Pararge aegeria;l;Pararge aegeria;0.999999999963165;  
MH089612;Lepidoptera;Pararge aegeria;Pararge aegeria;l;Pararge aegeria;0.999999999963165;  
MH089613;Lepidoptera;Pararge aegeria;Pararge aegeria;l;Pararge aegeria;0.999999999963165;  
MH089614;Lepidoptera;Pararge aegeria;Pararge aegeria;l;Pararge aegeria;0.99999999342521;  
MH089615;Lepidoptera;Pararge aegeria;Pararge aegeria;l;Pararge aegeria;0.999999999963165;  
MH089616;Lepidoptera;Pararge aegeria;Pararge aegeria;l;Pararge aegeria;0.999999999963165;  
MH089617;Lepidoptera;Pararge aegeria;Pararge aegeria;l;Pararge aegeria;0.99999999762906;  
MH089618;Lepidoptera;Pararge aegeria;Pararge aegeria;l;Pararge aegeria;0.999999999963165;

[illegible]

[illegible]

MH089798;Lepidoptera;Pararge aegeria;Pararge aegeria;1;Pararge aegeria;0.999999999963165;  
MH089799;Lepidoptera;Pararge aegeria;Pararge aegeria;1;Pararge aegeria;0.999999999963165;  
MH089800;Lepidoptera;Pararge aegeria;Pararge aegeria;1;Pararge aegeria;0.999999999963165;  
MH089801;Lepidoptera;Pararge aegeria;Pararge aegeria;1;Pararge aegeria;0.999999999963165;  
MH089802;Lepidoptera;Pararge aegeria;Pararge aegeria;1;Pararge aegeria;0.999999999963165;  
MH089803;Lepidoptera;Pararge aegeria;Pararge aegeria;1;Pararge aegeria;0.999999999963165;  
MH089804;Lepidoptera;Pararge aegeria;Pararge aegeria;1;Pararge aegeria;0.999999999967883;  
MH089805;Lepidoptera;Pararge aegeria;Pararge aegeria;1;Pararge aegeria;0.999999999963165;  
MH089806;Lepidoptera;Pararge aegeria;Pararge aegeria;1;Pararge aegeria;0.999999999963165;  
MH089807;Lepidoptera;Pararge aegeria;Pararge aegeria;1;Pararge aegeria;0.999999999969857;  
MH089808;Lepidoptera;Pararge aegeria;Pararge aegeria;1;Pararge aegeria;0.999999999963165;  
MH089809;Lepidoptera;Pararge aegeria;Pararge aegeria;1;Pararge aegeria;0.999999999963165;  
MH089810;Lepidoptera;Pararge aegeria;Pararge aegeria;1;Pararge aegeria;0.999999999975955;  
MH089811;Lepidoptera;Pararge aegeria;Pararge aegeria;1;Pararge aegeria;0.999999999963165;  
MH089812;Lepidoptera;Pararge aegeria;Pararge aegeria;1;Pararge aegeria;0.999999999963165;  
MH089813;Lepidoptera;Pararge aegeria;Pararge aegeria;1;Pararge aegeria;0.999999999963165;  
MH089814;Lepidoptera;Pararge aegeria;Pararge aegeria;1;Pararge aegeria;0.999999999963165;  
MH089815;Lepidoptera;Pararge aegeria;Pararge aegeria;1;Pararge aegeria;0.999999999963165;  
MH089816;Lepidoptera;Pararge aegeria;Pararge aegeria;1;Pararge aegeria;0.999999999963165;  
MH089817;Lepidoptera;Pararge aegeria;Pararge aegeria;1;Pararge aegeria;0.9999999965384661;  
MH089819;Lepidoptera;Pararge aegeria;Pararge aegeria;1;Pararge aegeria;0.999999999963165;  
MH089820;Lepidoptera;Pararge aegeria;Pararge aegeria;1;Pararge aegeria;0.999999999969063;  
MH089821;Lepidoptera;Pararge aegeria;Pararge aegeria;1;Pararge aegeria;0.999999999963165;  
MH089822;Lepidoptera;Pararge aegeria;Pararge aegeria;1;Pararge aegeria;0.999999999963165;  
MH089823;Lepidoptera;Pararge aegeria;Pararge aegeria;1;Pararge aegeria;0.999999999963165;  
MH089824;Lepidoptera;Pararge aegeria;Pararge aegeria;1;Pararge aegeria;0.999999999963165;  
MH089825;Lepidoptera;Pararge aegeria;Pararge aegeria;1;Pararge aegeria;0.999999999963165;  
MH089826;Lepidoptera;Pararge aegeria;Pararge aegeria;1;Pararge aegeria;0.999999999963165;  
MH089827;Lepidoptera;Pararge aegeria;Pararge aegeria;1;Pararge aegeria;0.999999999963165;  
MH089828;Lepidoptera;Pararge aegeria;Pararge aegeria;1;Pararge aegeria;0.9999999999805141;  
MH089830;Lepidoptera;Pararge aegeria;Pararge aegeria;1;Pararge aegeria;0.999999999975955;  
MH089831;Lepidoptera;Pararge aegeria;Pararge aegeria;1;Pararge aegeria;0.999999999955435;  
MH089832;Lepidoptera;Pararge aegeria;Pararge aegeria;1;Pararge aegeria;0.999999999963165;  
MH089833;Lepidoptera;Pararge aegeria;Pararge aegeria;1;Pararge aegeria;0.999999999963165;  
MH089834;Lepidoptera;Pararge aegeria;Pararge aegeria;1;Pararge aegeria;0.999999999969063;  
MH089835;Lepidoptera;Pararge aegeria;Pararge aegeria;1;Pararge aegeria;0.999999999970726;  
MH089836;Lepidoptera;Pararge aegeria;Pararge aegeria;1;Pararge aegeria;0.999999997556188;  
MH089837;Lepidoptera;Pararge aegeria;Pararge aegeria;1;Pararge aegeria;0.999999999963165;  
MH089838;Lepidoptera;Pararge aegeria;Pararge aegeria;1;Pararge aegeria;0.999999999963165;  
MH089839;Lepidoptera;Pararge aegeria;Pararge aegeria;1;Pararge aegeria;0.999999999963165;  
MH308299;Lepidoptera;Melanargia galathea;Melanargia galathea;NA;Melanargia  
galathea;0.991491340615494;  
MH308300;Lepidoptera;Melanargia galathea;Melanargia galathea;NA;Melanargia  
galathea;0.959429932872284;  
MH308302;Lepidoptera;Melanargia galathea;Melanargia galathea;NA;Melanargia  
galathea;0.981855578470499;  
MH308326;Lepidoptera;Melanargia galathea;Melanargia galathea;0.004;Melanargia  
galathea;0.965820796066182;  
MH308327;Lepidoptera;Melanargia galathea;Melanargia galathea;NA;Melanargia  
galathea;0.959429932872284;  
MH308330;Lepidoptera;Melanargia galathea;Melanargia galathea;NA;Melanargia  
galathea;0.959429932872284;  
MH308332;Lepidoptera;Melanargia galathea;Melanargia galathea;NA;Melanargia  
galathea;0.902844057936915;  
MH308333;Lepidoptera;Melanargia galathea;Melanargia galathea;NA;Melanargia  
galathea;0.935799586887365;  
MH308334;Lepidoptera;Melanargia galathea;Melanargia galathea;0.001;Melanargia  
galathea;0.963298866527903;  
MH308361;Lepidoptera;Melanargia galathea;Melanargia galathea;NA;Melanargia  
galathea;0.959429932872284;  
MH308362;Lepidoptera;Melanargia galathea;Melanargia galathea;NA;Melanargia  
galathea;0.959429932872284;  
MH407225;Lepidoptera;Scolitantides orion;Scolitantides orion;NA;Scolitantides  
orion;0.999999996904694;  
MH418490;Lepidoptera;Glaucopsyche alexis;Glaucopsyche alexis;0.001;Glaucopsyche  
alexis;0.94042380088325;  
MH418492;Lepidoptera;Lasiommata megera;Lasiommata megera;1;Lasiommata megera;0.999379144055441;  
MH418494;Lepidoptera;Hipparchia statilinus;Hipparchia statilinus;1;Hipparchia  
statilinus;0.999999999999943;  
MH418496;Lepidoptera;Lasiommata paramegaera;Lasiommata paramegaera;0.001;Lasiommata  
paramegaera;0.974943507761532;  
MH418497;Lepidoptera;Aricia agestis;NA;0.253;Aricia agestis;0.996350017387504;  
MH418501;Lepidoptera;Lasiommata megera;Lasiommata megera;1;Lasiommata megera;0.999379144055441;  
MH418502;Lepidoptera;Pieris napi;NA;0.028;Pieris napi;0.888205720664699;  
MH418503;Lepidoptera;Melitaea didyma;Melitaea didyma;1;Melitaea didyma;0.999945824175549;  
MH418505;Lepidoptera;Lasiommata megera;Lasiommata megera;1;Lasiommata megera;0.999379144055441;  
MH418506;Lepidoptera;Coenonympha pamphilus;Coenonympha pamphilus;1;Coenonympha  
pamphilus;0.999999999999744;

MH418507;Lepidoptera;Callophrys rubi;NA;0.001;Callophrys rubi;0.998885705938309;  
MH418509;Lepidoptera;Lycaena phlaeas;Lycaena phlaeas;1;Lycaena phlaeas;0.999999996363186;  
MH418510;Lepidoptera;Aglais ichnusa;Aglais ichnusa;0.003;NA;0.999999990022183;  
MH418511;Lepidoptera;Maniola cecilia;Pyronia cecilia;NA;Pyronia cecilia;1;  
MH418512;Lepidoptera;Callophrys rubi;NA;0.001;Callophrys rubi;0.998885705938309;  
MH418513;Lepidoptera;Argynnis paphia;Argynnis paphia;1;Argynnis paphia;0.999999992693603;  
MH418516;Lepidoptera;Gegenes pumilio;Gegenes pumilio;1;Gegenes pumilio;0.999986726679266;  
MH418517;Lepidoptera;Celastrina argiolus;Celastrina argiolus;1;Celastrina argiolus;0.999527385150531;  
MH418521;Lepidoptera;Hipparchia neomiris;Hipparchia neomiris;1;Hipparchia neomiris;0.99999999998693;  
MH418522;Lepidoptera;Charaxes jasius;Charaxes jasius;NA;Charaxes jasius;0.990397821479112;  
MH418523;Lepidoptera;Maniola cecilia;Pyronia cecilia;NA;Pyronia cecilia;1;  
MH418524;Lepidoptera;Lasiommata megera;Lasiommata megera;1;Lasiommata megera;0.999379144055441;  
MH418525;Lepidoptera;Colias crocea;NA;0.059;NA;0.99999999999738;  
MH418526;Lepidoptera;Lasiommata megera;Lasiommata megera;1;Lasiommata megera;0.999379144055441;  
MH418527;Lepidoptera;Thymelicus acteon;Thymelicus acteon;1;Thymelicus acteon;0.999999954806129;  
MH418528;Lepidoptera;Charaxes jasius;Charaxes jasius;NA;Charaxes jasius;0.990397821479112;  
MH418529;Lepidoptera;Pieris napi;NA;0.011;Pieris napi;0.801985394724814;  
MH418530;Lepidoptera;Melitaea cinxia;Melitaea cinxia;1;Melitaea cinxia;0.99999999998749;  
MH418532;Lepidoptera;Colias crocea;NA;0.059;NA;0.99999999999738;  
MH418533;Lepidoptera;Lampides boeticus;Lampides boeticus;1;Lampides boeticus;0.99999999550823;  
MH418534;Lepidoptera;Hipparchia neomiris;Hipparchia neomiris;1;Hipparchia neomiris;0.99999999999204;  
MH418535;Lepidoptera;Colias crocea;NA;0.059;NA;0.99999999999738;  
MH418537;Lepidoptera;Thymelicus acteon;Thymelicus acteon;1;Thymelicus acteon;0.9999999752248;  
MH418538;Lepidoptera;Papilio machaon;Papilio machaon;NA;Papilio machaon;0.99889956649962;  
MH418539;Lepidoptera;Lycaena phlaeas;Lycaena phlaeas;1;Lycaena phlaeas;0.999999996363186;  
MH418540;Lepidoptera;Anthocharis cardamines;Anthocharis cardamines;1;Anthocharis cardamines;0.999999988534341;  
MH418541;Lepidoptera;Lampides boeticus;Lampides boeticus;1;Lampides boeticus;0.99999999545906;  
MH418543;Lepidoptera;Colias crocea;NA;0.059;NA;0.99999999999738;  
MH418544;Lepidoptera;Colias crocea;NA;0.059;NA;0.99999999999738;  
MH418545;Lepidoptera;Lampides boeticus;Lampides boeticus;1;Lampides boeticus;0.99999999545906;  
MH418546;Lepidoptera;Pieris napi;NA;0.013;Pieris napi;0.764655619178569;  
MH418547;Lepidoptera;Gonepteryx cleopatra;Gonepteryx cleopatra;0.998;Gonepteryx cleopatra;0.999118636582266;  
MH418549;Lepidoptera;Coenonympha pamphilus;Coenonympha pamphilus;1;Coenonympha pamphilus;0.999999999998835;  
MH418551;Lepidoptera;Coenonympha pamphilus;Coenonympha pamphilus;1;Coenonympha pamphilus;0.99999999999744;  
MH418554;Lepidoptera;Vanessa atalanta;Vanessa atalanta;1;Vanessa atalanta;0.999999999757762;  
MH418556;Lepidoptera;Melitaea nevadensis;NA;0.009;Melitaea celadussa;0.785259955389478;  
MH418557;Lepidoptera;Maniola cecilia;Pyronia cecilia;NA;Pyronia cecilia;0.99999999999972;  
MH418558;Lepidoptera;Carcharodus alceae;Carcharodus alceae;0.001;Carcharodus alceae;0.999999994870137;  
MH418559;Lepidoptera;Coenonympha corinna;Coenonympha corinna;1;Coenonympha corinna;0.999999999567109;  
MH418561;Lepidoptera;Lampides boeticus;Lampides boeticus;1;Lampides boeticus;0.99999999545906;  
MH418562;Lepidoptera;Hipparchia aristaeus;Hipparchia aristaeus;1;Hipparchia aristaeus;0.9999998864102;  
MH418563;Lepidoptera;Lasiommata megera;Lasiommata megera;1;Lasiommata megera;0.999379144055441;  
MH418567;Lepidoptera;Argynnis paphia;Argynnis paphia;1;Argynnis paphia;0.999999991389927;  
MH418568;Lepidoptera;Colias crocea;NA;0.059;NA;0.99999999999738;  
MH418570;Lepidoptera;Carcharodus alceae;Carcharodus alceae;1;Carcharodus alceae;0.999999990863188;  
MH418571;Lepidoptera;Coenonympha pamphilus;Coenonympha pamphilus;1;Coenonympha pamphilus;0.999999999983061;  
MH418573;Lepidoptera;Melitaea cinxia;Melitaea cinxia;1;Melitaea cinxia;0.99999999999631;  
MH418578;Lepidoptera;Gonepteryx rhamni;NA;0.474;Gonepteryx rhamni;0.982076396127858;  
MH418581;Lepidoptera;Maniola cecilia;Pyronia cecilia;NA;Pyronia cecilia;1;  
MH418583;Lepidoptera;Lycaena phlaeas;Lycaena phlaeas;1;Lycaena phlaeas;0.999999996363186;  
MH418586;Lepidoptera;Lasiommata megera;Lasiommata megera;1;Lasiommata megera;0.999379144055441;  
MH418588;Lepidoptera;Melitaea nevadensis;NA;0.014;Melitaea celadussa;0.797886056890592;  
MH418589;Lepidoptera;Hipparchia neomiris;Hipparchia neomiris;1;Hipparchia neomiris;0.99999999999375;  
MH418590;Lepidoptera;Maniola cecilia;Pyronia cecilia;1;Pyronia cecilia;1;  
MH418592;Lepidoptera;Vanessa atalanta;Vanessa atalanta;1;Vanessa atalanta;0.99999999549829;  
MH418593;Lepidoptera;Coenonympha corinna;Coenonympha corinna;1;Coenonympha corinna;0.99999999995197;  
MH418594;Lepidoptera;Lasiommata megera;Lasiommata megera;1;Lasiommata megera;0.999379144055441;  
MH418595;Lepidoptera;Pyrgus armoricanus;Pyrgus armoricanus;1;Pyrgus armoricanus;0.999997353848817;  
MH418597;Lepidoptera;Lasiommata megera;Lasiommata megera;1;Lasiommata megera;0.999379144055441;  
MH418598;Lepidoptera;Favonius quercus;NA;Favonius quercus;0.73046069582187;  
MH418599;Lepidoptera;Papilio machaon;Papilio machaon;0.002;Papilio machaon;0.999372607272923;  
MH418600;Lepidoptera;Vanessa atalanta;Vanessa atalanta;1;Vanessa atalanta;0.99999999805453;  
MH418601;Lepidoptera;Vanessa atalanta;Vanessa atalanta;1;Vanessa atalanta;0.999999999757762;



MH418602;Lepidoptera;Pyrgus armoricanus;Pyrgus armoricanus;1;Pyrgus armoricanus;0.999997353848817;  
MH418603;Lepidoptera;Carcharodus alceae;Carcharodus alceae;1;Carcharodus alceae;0.99999998465938;  
MH418604;Lepidoptera;Lasiommata paramegaera;Lasiommata paramegaera;0.001;Lasiommata paramegaera;0.974943507761532;  
MH418605;Lepidoptera;Coenonympha corinna;Coenonympha corinna;1;Coenonympha corinna;0.99999999567109;  
MH418606;Lepidoptera;Lasiommata paramegaera;Lasiommata paramegaera;0.001;Lasiommata paramegaera;0.996916524417848;  
MH418607;Lepidoptera;Gegenes pumilio;Gegenes pumilio;1;Gegenes pumilio;0.999986726679266;  
MH418608;Lepidoptera;Favonius quercus;NA;0.002;Favonius quercus;0.732659082125295;  
MH418609;Lepidoptera;Issoria lathonia;Issoria lathonia;1;Issoria lathonia;0.99999999989257;  
MH418611;Lepidoptera;Coenonympha corinna;Coenonympha corinna;1;Coenonympha corinna;0.99999999481616;  
MH418613;Lepidoptera;Glaucopsyche alexis;Glaucopsyche alexis;0.001;Glaucopsyche alexis;0.94042380088325;  
MH418614;Lepidoptera;Vanessa atalanta;Vanessa atalanta;1;Vanessa atalanta;0.99999999757762;  
MH418615;Lepidoptera;Papilio machaon;Papilio machaon;0.003;Papilio machaon;0.999482752749035;  
MH418617;Lepidoptera;Lasiommata megera;Lasiommata megera;1;Lasiommata megera;0.998531205767617;  
MH418618;Lepidoptera;Lycaena phlaeas;Lycaena phlaeas;1;Lycaena phlaeas;0.999999996363186;  
MH418620;Lepidoptera;Coenonympha corinna;Coenonympha corinna;1;Coenonympha corinna;0.99999999567109;  
MH418621;Lepidoptera;Celastrina argiolus;Celastrina argiolus;1;Celastrina argiolus;0.999527385150531;  
MH418622;Lepidoptera;Satyrium ilicis;Satyrium ilicis;1;Satyrium ilicis;0.999999987901305;  
MH418625;Lepidoptera;Papilio machaon;Papilio machaon;NA;Papilio machaon;0.99889956649962;  
MH418628;Lepidoptera;Coenonympha corinna;Coenonympha corinna;1;Coenonympha corinna;0.999999881210819;  
MH418629;Lepidoptera;Lycaena phlaeas;Lycaena phlaeas;1;Lycaena phlaeas;0.999999998167567;  
MH418630;Lepidoptera;Carcharodus alceae;Carcharodus alceae;0.999;Carcharodus alceae;0.999999996339511;  
MH418631;Lepidoptera;Lasiommata megera;Lasiommata megera;1;Lasiommata megera;0.999379144055441;  
MH418632;Lepidoptera;Celastrina argiolus;Celastrina argiolus;1;Celastrina argiolus;0.999527385150531;  
MH418634;Lepidoptera;Aglais urticae;NA;0.002;Aglais urticae;0.987497593219019;  
MH418637;Lepidoptera;Celastrina argiolus;Celastrina argiolus;1;Celastrina argiolus;0.999037794018796;  
MH418638;Lepidoptera;Gonepteryx cleopatra;Gonepteryx cleopatra;0.998;Gonepteryx cleopatra;0.999118636582266;  
MH418639;Lepidoptera;Carcharodus alceae;Carcharodus alceae;1;Carcharodus alceae;0.999999927744201;  
MH418640;Lepidoptera;Papilio machaon;Papilio machaon;0.001;Papilio machaon;0.999336308413213;  
MH418641;Lepidoptera;Vanessa atalanta;Vanessa atalanta;1;Vanessa atalanta;0.99999999757762;  
MH418642;Lepidoptera;Papilio machaon;Papilio machaon;NA;Papilio machaon;0.999582609409348;  
MH418644;Lepidoptera;Lasiommata paramegaera;Lasiommata paramegaera;0.999;Lasiommata paramegaera;0.995283446287531;  
MH418647;Lepidoptera;Lasiommata paramegaera;Lasiommata paramegaera;0.999;Lasiommata paramegaera;0.995283446287531;  
MH418650;Lepidoptera;Maniola cecilia;Pyronia cecilia;1;Pyronia cecilia;0.999999999999972;  
MH418651;Lepidoptera;Thymelicus acteon;Thymelicus acteon;1;Thymelicus acteon;0.99999999752248;  
MH418652;Lepidoptera;Satyrium ilicis;Satyrium ilicis;1;Satyrium ilicis;0.999999987901305;  
MH418654;Lepidoptera;Lycaena phlaeas;Lycaena phlaeas;1;Lycaena phlaeas;0.999999996363186;  
MH418656;Lepidoptera;Gonepteryx cleopatra;Gonepteryx cleopatra;0.998;Gonepteryx cleopatra;0.999118636582266;  
MH418657;Lepidoptera;Lasiommata megera;Lasiommata megera;0.999;Lasiommata megera;0.999701831224245;  
MH418658;Lepidoptera;Argynnis paphia;Argynnis paphia;1;Argynnis paphia;0.999999991389927;  
MH418659;Lepidoptera;Papilio machaon;Papilio machaon;NA;Papilio machaon;0.998335940984695;  
MH418660;Lepidoptera;Vanessa atalanta;Vanessa atalanta;1;Vanessa atalanta;0.99999999757762;  
MH418661;Lepidoptera;Lampides boeticus;Lampides boeticus;1;Lampides boeticus;0.99999999545906;  
MH418662;Lepidoptera;Gonepteryx cleopatra;Gonepteryx cleopatra;0.998;Gonepteryx cleopatra;0.999118636582266;  
MH418664;Lepidoptera;Callophrys rubi;NA;0.019;Callophrys rubi;0.998201459637982;  
MH418665;Lepidoptera;Maniola cecilia;Pyronia cecilia;NA;Pyronia cecilia;1;  
MH418666;Lepidoptera;Papilio machaon;Papilio machaon;NA;Papilio machaon;0.998335940984695;  
MH418667;Lepidoptera;Colias crocea;NA;0.059;NA;0.999999999999738;  
MH418669;Lepidoptera;Thymelicus acteon;Thymelicus acteon;1;Thymelicus acteon;0.99999999752248;  
MH418670;Lepidoptera;Celastrina argiolus;Celastrina argiolus;1;Celastrina argiolus;0.998121368997996;  
MH418671;Lepidoptera;Maniola tithonus;Pyronia tithonus;1;Pyronia tithonus;1;  
MH418673;Lepidoptera;Coenonympha pamphilus;Coenonympha pamphilus;1;Coenonympha pamphilus;0.999999999999744;  
MH418674;Lepidoptera;Issoria lathonia;Issoria lathonia;1;Issoria lathonia;0.99999999989257;  
MH418675;Lepidoptera;Charaxes jasius;Charaxes jasius;NA;Charaxes jasius;0.979358487720088;  
MH418678;Lepidoptera;Coenonympha corinna;Coenonympha corinna;1;Coenonympha corinna;0.99999999567109;  
MH418679;Lepidoptera;Pieris napi;NA;0.028;Pieris napi;0.888205720664699;

MH418680;Lepidoptera;Vanessa atalanta;Vanessa atalanta;1;Vanessa atalanta;0.99999999757762;  
MH418682;Lepidoptera;Maniola jurtina;NA;0.038;NA;0.99999999999524;  
MH418683;Lepidoptera;Coenonympha pamphilus;Coenonympha pamphilus;1;Coenonympha  
pamphilus;0.99999999999744;  
MH418684;Lepidoptera;Celastrina argiolus;Celastrina argiolus;1;Celastrina  
argiolus;0.999527385150531;  
MH418685;Lepidoptera;Hipparchia aristaeus;Hipparchia aristaeus;1;Hipparchia  
aristaeus;0.99999993824275;  
MH418687;Lepidoptera;Lampides boeticus;Lampides boeticus;1;Lampides boeticus;0.99999999545906;  
MH418688;Lepidoptera;Lampides boeticus;Lampides boeticus;1;Lampides boeticus;0.9999999876789;  
MH418689;Lepidoptera;Issoria lathonia;Issoria lathonia;1;Issoria lathonia;0.9999999989257;  
MH418690;Lepidoptera;Vanessa atalanta;Vanessa atalanta;1;Vanessa atalanta;0.99999999757762;  
MH418691;Lepidoptera;Carcharodus alceae;Carcharodus alceae;0.001;Carcharodus  
alceae;0.99999994870137;  
MH418692;Lepidoptera;Lampides boeticus;Lampides boeticus;1;Lampides boeticus;0.99999999545906;  
MH418693;Lepidoptera;Colias crocea;NA;0.059;NA;0.99999999999738;  
MH418694;Lepidoptera;Colias crocea;NA;0.059;NA;0.99999999999738;  
MH418695;Lepidoptera;Pieris napi;NA;0.009;Pieris napi;0.857602568978328;  
MH418696;Lepidoptera;Lycaena phlaeas;Lycaena phlaeas;1;Lycaena phlaeas;0.99999992669558;  
MH418697;Lepidoptera;Lasiommata megera;Lasiommata megera;1;Lasiommata megera;0.999379144055441;  
MH418698;Lepidoptera;Gonepteryx cleopatra;Gonepteryx cleopatra;0.998;Gonepteryx  
cleopatra;0.999118636582266;  
MH418699;Lepidoptera;Lasiommata megera;Lasiommata megera;1;Lasiommata megera;0.999379144055441;  
MH418700;Lepidoptera;Papilio machaon;Papilio machaon;NA;Papilio machaon;0.997246443353099;  
MH418701;Lepidoptera;Lasiommata megera;Lasiommata megera;1;Lasiommata megera;0.999379144055441;  
MH418704;Lepidoptera;Colias crocea;NA;0.059;NA;0.99999999999738;  
MH418705;Lepidoptera;Celastrina argiolus;Celastrina argiolus;1;Celastrina  
argiolus;0.999037794018796;  
MH418706;Lepidoptera;Lasiommata megera;Lasiommata megera;1;Lasiommata megera;0.998531205767617;  
MH418708;Lepidoptera;Lycaena phlaeas;Lycaena phlaeas;1;Lycaena phlaeas;0.99999996363186;  
MH418709;Lepidoptera;Colias crocea;NA;0.059;NA;0.99999999999738;  
MH418712;Lepidoptera;Lasiommata paramegaera;Lasiommata paramegaera;0.999;Lasiommata  
paramegaera;0.995283446287531;  
MH418716;Lepidoptera;Aglais ichnusa;Aglais ichnusa;0.003;NA;0.999999990022183;  
MH418719;Lepidoptera;Colias crocea;NA;0.059;NA;0.99999999999738;  
MH418722;Lepidoptera;Papilio machaon;Papilio machaon;0.001;Papilio machaon;0.999463129150422;  
MH418723;Lepidoptera;Colias crocea;NA;0.059;NA;0.99999999999738;  
MH418724;Lepidoptera;Lycaena phlaeas;Lycaena phlaeas;1;Lycaena phlaeas;0.99999996363186;  
MH418725;Lepidoptera;Lasiommata megera;Lasiommata megera;1;Lasiommata megera;0.999379144055441;  
MH418726;Lepidoptera;Lycaena phlaeas;Lycaena phlaeas;1;Lycaena phlaeas;0.99999996363186;  
MH418727;Lepidoptera;Carcharodus alceae;Carcharodus alceae;0.999;Carcharodus  
alceae;0.99999996339511;  
MH418729;Lepidoptera;Vanessa atalanta;Vanessa atalanta;1;Vanessa atalanta;0.9999999976086;  
MH418730;Lepidoptera;Vanessa atalanta;Vanessa atalanta;1;Vanessa atalanta;0.99999999757762;  
MH418733;Lepidoptera;Lampides boeticus;Lampides boeticus;1;Lampides boeticus;0.99999999545906;  
MH418737;Lepidoptera;Gonepteryx cleopatra;Gonepteryx cleopatra;0.998;Gonepteryx  
cleopatra;0.999118636582266;  
MH418739;Lepidoptera;Lasiommata megera;Lasiommata megera;1;Lasiommata megera;0.998531205767617;  
MH418740;Lepidoptera;Maniola cecilia;Pyronia cecilia;1;Pyronia cecilia;1;  
MH418742;Lepidoptera;Celastrina argiolus;Celastrina argiolus;1;Celastrina  
argiolus;0.999037794018796;  
MH418743;Lepidoptera;Aricia agestis;Aricia agestis;0.001;Aricia agestis;0.972120797608056;  
MH418745;Lepidoptera;Lycaena phlaeas;Lycaena phlaeas;1;Lycaena phlaeas;0.99999998167567;  
MH418746;Lepidoptera;Coenonympha corinna;Coenonympha corinna;1;Coenonympha  
corinna;0.99999999567109;  
MH418747;Lepidoptera;Lasiommata paramegaera;Lasiommata paramegaera;0.999;Lasiommata  
paramegaera;0.995283446287531;  
MH418751;Lepidoptera;Pieris rapae;NA;NA;Pieris rapae;0.999962030706249;  
MH418752;Lepidoptera;Pieris rapae;Pieris rapae;NA;Pieris rapae;0.99992265968936;  
MH418753;Lepidoptera;Lampides boeticus;Lampides boeticus;1;Lampides boeticus;0.99999999545906;  
MH418754;Lepidoptera;Colias crocea;NA;0.065;NA;0.99999999999745;  
MH418757;Lepidoptera;Argynnis paphia;Argynnis paphia;1;Argynnis paphia;0.999999991389927;  
MH418758;Lepidoptera;Maniola cecilia;Pyronia cecilia;1;Pyronia cecilia;1;  
MH418759;Lepidoptera;Lasiommata megera;Lasiommata megera;0.998;Lasiommata  
megera;0.998568158791128;  
MH418760;Lepidoptera;Gonepteryx cleopatra;Gonepteryx cleopatra;0.001;Gonepteryx  
cleopatra;0.999134475039697;  
MH418761;Lepidoptera;Lampides boeticus;Lampides boeticus;1;Lampides boeticus;0.99999999545906;  
MH418762;Lepidoptera;Celastrina argiolus;Celastrina argiolus;1;Celastrina  
argiolus;0.999527385150531;  
MH418763;Lepidoptera;Charaxes jасius;Charaxes jасius;NA;Charaxes jасius;0.990397821479112;  
MH418767;Lepidoptera;Lasiommata megera;Lasiommata megera;1;Lasiommata megera;0.999379144055441;  
MH418768;Lepidoptera;Lycaena phlaeas;Lycaena phlaeas;1;Lycaena phlaeas;0.99999998505558;  
MH418770;Lepidoptera;Lampides boeticus;Lampides boeticus;1;Lampides boeticus;0.99999999411585;  
MH418771;Lepidoptera;Maniola cecilia;Pyronia cecilia;1;Pyronia cecilia;1;  
MH418776;Lepidoptera;Glaucopsyche alexis;NA;NA;Glaucopsyche alexis;0.979381169624069;  
MH418779;Lepidoptera;Coenonympha corinna;Coenonympha corinna;1;Coenonympha  
corinna;0.99999999567109;

MH418780;Lepidoptera;Favonius quercus;NA;0.002;Favonius quercus;0.732659082125295;  
MH418782;Lepidoptera;Coenonympha corinna;Coenonympha corinna;1;Coenonympha  
corinna;0.999999853807008;  
MH418783;Lepidoptera;Satyrium ilicis;Satyrium ilicis;1;Satyrium ilicis;0.999999987901305;  
MH418785;Lepidoptera;Papilio machaon;Papilio machaon;0.003;Papilio machaon;0.999659108582311;  
MH418786;Lepidoptera;Celastrina argiolus;Celastrina argiolus;1;Celastrina  
argiolus;0.999037794018796;  
MH418787;Lepidoptera;Argynnis paphia;Argynnis paphia;1;Argynnis paphia;0.999999991389927;  
MH418789;Lepidoptera;Lycaena phlaeas;Lycaena phlaeas;1;Lycaena phlaeas;0.999999996363186;  
MH418792;Lepidoptera;Lasiommata megera;Lasiommata megera;1;Lasiommata megera;0.999379144055441;  
MH418793;Lepidoptera;Anthocharis cardamines;Anthocharis cardamines;1;Anthocharis  
cardamines;0.99999997953563;  
MH418794;Lepidoptera;Lycaena phlaeas;Lycaena phlaeas;1;Lycaena phlaeas;0.999999996363186;  
MH418795;Lepidoptera;Lasiommata megera;Lasiommata megera;1;Lasiommata megera;0.999379144055441;  
MH418797;Lepidoptera;Lasiommata megera;Lasiommata megera;1;Lasiommata megera;0.999379144055441;  
MH418798;Lepidoptera;Celastrina argiolus;Celastrina argiolus;1;Celastrina  
argiolus;0.999527385150531;  
MH418799;Lepidoptera;Lasiommata megera;Lasiommata megera;1;Lasiommata megera;0.999939556832216;  
MH418800;Lepidoptera;Colias crocea;NA;0.059;NA;0.999999999999738;  
MH418803;Lepidoptera;Glaucopsyche alexis;Glaucopsyche alexis;0.001;Glaucopsyche  
alexis;0.94042380088325;  
MH418804;Lepidoptera;Hipparchia statilinus;Hipparchia statilinus;1;Hipparchia  
statilinus;0.999999999999943;  
MH418805;Lepidoptera;Lampides boeticus;Lampides boeticus;1;Lampides boeticus;0.99999999545906;  
MH418806;Lepidoptera;Lycaena phlaeas;Lycaena phlaeas;1;Lycaena phlaeas;0.999999996363186;  
MH418808;Lepidoptera;Coenonympha pamphilus;Coenonympha pamphilus;1;Coenonympha  
pamphilus;0.999999999999744;  
MH418809;Lepidoptera;Celastrina argiolus;Celastrina argiolus;1;Celastrina  
argiolus;0.999527385150531;  
MH418810;Lepidoptera;Pieris rapae;Pieris rapae;NA;Pieris rapae;0.999994286682757;  
MH418811;Lepidoptera;Glaucopsyche alexis;Glaucopsyche alexis;0.001;Glaucopsyche  
alexis;0.94042380088325;  
MH418813;Lepidoptera;Lasiommata megera;Lasiommata megera;1;Lasiommata megera;0.999379144055441;  
MH418816;Lepidoptera;Pieris napi;NA;0.011;Pieris napi;0.801985394724814;  
MH418818;Lepidoptera;Hipparchia statilinus;Hipparchia statilinus;1;Hipparchia  
statilinus;0.999999999999943;  
MH418819;Lepidoptera;Gegenes pumilio;Gegenes pumilio;1;Gegenes pumilio;0.999986726679266;  
MH418820;Lepidoptera;Celastrina argiolus;Celastrina argiolus;1;Celastrina  
argiolus;0.999527385150531;  
MH418823;Lepidoptera;Favonius quercus;NA;NA;Favonius quercus;0.73046069582187;  
MH418824;Lepidoptera;Pieris napi;NA;NA;Pieris napi;0.874112864145033;  
MH418826;Lepidoptera;Pieris rapae;NA;NA;Pieris rapae;0.999970257792891;  
MH418828;Lepidoptera;Pieris rapae;NA;NA;Pieris rapae;0.999970925323953;  
MH418829;Lepidoptera;Coenonympha pamphilus;Coenonympha pamphilus;1;Coenonympha  
pamphilus;0.99999999983061;  
MH418830;Lepidoptera;Satyrium ilicis;Satyrium ilicis;1;Satyrium ilicis;0.999999987901305;  
MH418832;Lepidoptera;Thymelicus acteon;Thymelicus acteon;1;Thymelicus acteon;0.99999999752248;  
MH418833;Lepidoptera;Pieris rapae;NA;NA;Pieris rapae;0.999992588119495;  
MH418834;Lepidoptera;Lycaena phlaeas;Lycaena phlaeas;1;Lycaena phlaeas;0.999999996363186;  
MH418836;Lepidoptera;Pieris napi;NA;0.011;Pieris napi;0.801985394724814;  
MH418839;Lepidoptera;Maniola jurtina;NA;0.001;Maniola jurtina;0.939220105860875;  
MH418840;Lepidoptera;Lasiommata megera;Lasiommata megera;1;Lasiommata megera;0.999379144055441;  
MH418841;Lepidoptera;Lasiommata paramegaera;Lasiommata paramegaera;0.999;Lasiommata  
paramegaera;0.995283446287531;  
MH418842;Lepidoptera;Pieris rapae;Pieris rapae;1;Pieris rapae;0.999996064425815;  
MH418843;Lepidoptera;Issoria lathonia;Issoria lathonia;1;Issoria lathonia;0.99999999989257;  
MH418844;Lepidoptera;Lasiommata megera;Lasiommata megera;1;Lasiommata megera;0.999379144055441;  
MH418846;Lepidoptera;Lampides boeticus;Lampides boeticus;1;Lampides boeticus;0.99999999545906;  
MH418850;Lepidoptera;Lampides boeticus;Lampides boeticus;1;Lampides boeticus;0.99999999545906;  
MH418852;Lepidoptera;Charaxes jasius;Charaxes jasius;NA;Charaxes jasius;0.990397821479112;  
MH418853;Lepidoptera;Lasiommata megera;Lasiommata megera;1;Lasiommata megera;0.998531205767617;  
MH418854;Lepidoptera;Pieris rapae;NA;0.039;Pieris rapae;0.999989302159245;  
MH418856;Lepidoptera;Celastrina argiolus;Celastrina argiolus;1;Celastrina  
argiolus;0.999527385150531;  
MH418858;Lepidoptera;Vanessa atalanta;Vanessa atalanta;1;Vanessa atalanta;0.999999999470958;  
MH418859;Lepidoptera;Colias crocea;NA;0.059;NA;0.999999999999738;  
MH418860;Lepidoptera;Pieris rapae;NA;NA;Pieris rapae;0.999957794752662;  
MH418861;Lepidoptera;Pieris rapae;NA;0.206;Pieris rapae;0.999929773639513;  
MH418862;Lepidoptera;Satyrium ilicis;Satyrium ilicis;1;Satyrium ilicis;0.999999987901305;  
MH418863;Lepidoptera;Vanessa atalanta;Vanessa atalanta;1;Vanessa atalanta;0.99999999757762;  
MH418864;Lepidoptera;Carcharodus alceae;Carcharodus alceae;0.999;Carcharodus  
alceae;0.999999996339511;  
MH418865;Lepidoptera;Maniola cecilia;Pyronia cecilia;NA;Pyronia cecilia;1;  
MH418866;Lepidoptera;Lasiommata megera;Lasiommata megera;1;Lasiommata megera;0.999928528239676;  
MH418868;Lepidoptera;Lycaena phlaeas;Lycaena phlaeas;1;Lycaena phlaeas;0.999999996363186;  
MH418871;Lepidoptera;Aricia cramera;Aricia cramera;1;Aricia cramera;0.999993731037033;  
MH418872;Lepidoptera;Maniola cecilia;Pyronia cecilia;1;Pyronia cecilia;1;  
MH418874;Lepidoptera;Pieris rapae;Pieris rapae;NA;Pieris rapae;0.999988086141146;

MH418875;Lepidoptera;Celastrina argiolus;Celastrina argiolus;1;Celastrina argiolus;0.999527385150531;  
MH418877;Lepidoptera;Lasiommata paramegaera;Lasiommata paramegaera;0.999;Lasiommata paramegaera;0.995283446287531;  
MH418878;Lepidoptera;Callophrys rubi;NA;0.001;Callophrys rubi;0.998885705938309;  
MH418879;Lepidoptera;Gonepteryx cleopatra;Gonepteryx cleopatra;0.998;Gonepteryx cleopatra;0.999118636582266;  
MH418880;Lepidoptera;Maniola tithonus;Pyronia tithonus;1;Pyronia tithonus;1;  
MH418882;Lepidoptera;Lasiommata megera;Lasiommata megera;1;Lasiommata megera;0.999928528239676;  
MH418883;Lepidoptera;Colias crocea;NA;NA;NA;0.999999999999491;  
MH418884;Lepidoptera;Gonepteryx cleopatra;Gonepteryx cleopatra;0.998;Gonepteryx cleopatra;0.999118636582266;  
MH418887;Lepidoptera;Carcharodus alceae;Carcharodus alceae;1;Carcharodus alceae;0.999999998465938;  
MH418889;Lepidoptera;Pieris rapae;NA;NA;Pieris rapae;0.999992588119495;  
MH418890;Lepidoptera;Hipparchia neomiris;Hipparchia neomiris;1;Hipparchia neomiris;0.999999999999602;  
MH418891;Lepidoptera;Celastrina argiolus;Celastrina argiolus;1;Celastrina argiolus;0.999527385150531;  
MH418892;Lepidoptera;Charaxes jasius;Charaxes jasius;NA;Charaxes jasius;0.990397821479112;  
MH418893;Lepidoptera;Vanessa atalanta;Vanessa atalanta;1;Vanessa atalanta;0.99999999757762;  
MH418894;Lepidoptera;Glaucopsyche alexis;Glaucopsyche alexis;0.001;Glaucopsyche alexis;0.970555559513917;  
MH418895;Lepidoptera;Gonepteryx cleopatra;Gonepteryx cleopatra;1;Gonepteryx cleopatra;0.998021026047298;  
MH418897;Lepidoptera;Maniola cecilia;Pyronia cecilia;1;Pyronia cecilia;1;  
MH418898;Lepidoptera;Lycaena phlaeas;Lycaena phlaeas;1;Lycaena phlaeas;0.999999998167567;  
MH418899;Lepidoptera;Maniola jurtina;NA;0.001;Maniola jurtina;0.939220105860875;  
MH418900;Lepidoptera;Celastrina argiolus;Celastrina argiolus;1;Celastrina argiolus;0.999631157817044;  
MH418901;Lepidoptera;Melitaea nevadensis;NA;0.869;Melitaea celadussa;0.928192792494775;  
MH418902;Lepidoptera;Lycaena phlaeas;Lycaena phlaeas;1;Lycaena phlaeas;0.999999996363186;  
MH418903;Lepidoptera;Satyrium ilicis;Satyrium ilicis;1;Satyrium ilicis;0.999999987901305;  
MH418904;Lepidoptera;Maniola cecilia;Pyronia cecilia;NA;Pyronia cecilia;1;  
MH418906;Lepidoptera;Maniola cecilia;Pyronia cecilia;NA;Pyronia cecilia;1;  
MH418907;Lepidoptera;Lycaena phlaeas;Lycaena phlaeas;1;Lycaena phlaeas;0.999999998167567;  
MH418908;Lepidoptera;Pieris rapae;NA;NA;Pieris rapae;0.999992588119495;  
MH418909;Lepidoptera;Lasiommata paramegaera;Lasiommata paramegaera;0.999;Lasiommata paramegaera;0.995283446287531;  
MH418912;Lepidoptera;Gegenes pumilio;Gegenes pumilio;1;Gegenes pumilio;0.999989874205988;  
MH418913;Lepidoptera;Lycaena phlaeas;Lycaena phlaeas;1;Lycaena phlaeas;0.999999998167567;  
MH418914;Lepidoptera;Pieris rapae;NA;0.175;Pieris rapae;0.99996637543374;  
MH418915;Lepidoptera;Charaxes jasius;Charaxes jasius;NA;Charaxes jasius;0.990397821479112;  
MH418917;Lepidoptera;Pieris rapae;NA;NA;Pieris rapae;0.999957794752662;  
MH418919;Lepidoptera;Hipparchia aristaeus;Hipparchia aristaeus;1;Hipparchia aristaeus;0.999999988161392;  
MH418923;Lepidoptera;Pieris napi;NA;0.011;Pieris napi;0.801985394724814;  
MH418924;Lepidoptera;Lycaena phlaeas;Lycaena phlaeas;1;Lycaena phlaeas;0.999999992669558;  
MH418925;Lepidoptera;Coenonympha corinna;Coenonympha corinna;1;Coenonympha corinna;0.999999853807008;  
MH418931;Lepidoptera;Lampides boeticus;Lampides boeticus;1;Lampides boeticus;0.999999999469992;  
MH418933;Lepidoptera;Lycaena phlaeas;Lycaena phlaeas;1;Lycaena phlaeas;0.999999998167567;  
MH418934;Lepidoptera;Maniola tithonus;Pyronia tithonus;1;Pyronia tithonus;0.999999999999972;  
MH418936;Lepidoptera;Pieris rapae;NA;NA;Pieris rapae;0.999992588119495;  
MH418938;Lepidoptera;Carcharodus alceae;Carcharodus alceae;1;Carcharodus alceae;0.999999998465938;  
MH418939;Lepidoptera;Gegenes pumilio;Gegenes pumilio;1;Gegenes pumilio;0.999986726679266;  
MH418940;Lepidoptera;Issoria lathonia;Issoria lathonia;1;Issoria lathonia;0.99999999989257;  
MH418941;Lepidoptera;Vanessa atalanta;Vanessa atalanta;1;Vanessa atalanta;0.99999999757762;  
MH418942;Lepidoptera;Coenonympha pamphilus;Coenonympha pamphilus;1;Coenonympha pamphilus;0.99999999983061;  
MH418944;Lepidoptera;Lampides boeticus;Lampides boeticus;1;Lampides boeticus;0.999999999545906;  
MH418945;Lepidoptera;Charaxes jasius;Charaxes jasius;NA;Charaxes jasius;0.990397821479112;  
MH418947;Lepidoptera;Callophrys rubi;NA;0.019;Callophrys rubi;0.998201459637982;  
MH418948;Lepidoptera;Favonius quercus;NA;NA;Favonius quercus;0.73046069582187;  
MH418949;Lepidoptera;Colias crocea;NA;0.059;NA;0.99999999999738;  
MH418950;Lepidoptera;Hipparchia aristaeus;Hipparchia aristaeus;1;Hipparchia aristaeus;0.999999996564412;  
MH418952;Lepidoptera;Glaucopsyche alexis;Glaucopsyche alexis;0.001;Glaucopsyche alexis;0.94042380088325;  
MH418953;Lepidoptera;Celastrina argiolus;Celastrina argiolus;1;Celastrina argiolus;0.999037794018796;  
MH418954;Lepidoptera;Charaxes jasius;Charaxes jasius;NA;Charaxes jasius;0.990397821479112;  
MH418955;Lepidoptera;Coenonympha pamphilus;Coenonympha pamphilus;1;Coenonympha pamphilus;0.99999999997954;  
MH418957;Lepidoptera;Gonepteryx rhamni;Gonepteryx rhamni;0.008;Gonepteryx rhamni;0.999485025383278;

MH418963;Lepidoptera;Coenonympha corinna;Coenonympha corinna;1;Coenonympha corinna;0.99999999567109;  
MH418964;Lepidoptera;Lasiommata megera;Lasiommata megera;1;Lasiommata megera;0.998531205767617;  
MH418965;Lepidoptera;Pieris rapae;NA;NA;Pieris rapae;0.999984333973504;  
MH418968;Lepidoptera;Lasiommata megera;Lasiommata megera;1;Lasiommata megera;0.998531205767617;  
MH418970;Lepidoptera;Pieris napi;NA;0.011;Pieris napi;0.801985394724814;  
MH418971;Lepidoptera;Papilio machaon;Papilio machaon;NA;Papilio machaon;0.998335940984695;  
MH418972;Lepidoptera;Callophrys rubi;NA;0.001;Callophrys rubi;0.998885705938309;  
MH418974;Lepidoptera;Aglais ichnusa;Aglais ichnusa;0.998;NA;0.999999996206876;  
MH418979;Lepidoptera;Aricia agestis;Aricia agestis;1;Aricia agestis;0.979315827401608;  
MH418980;Lepidoptera;Maniola cecilia;Pyronia cecilia;1;Pyronia cecilia;0.999999999999972;  
MH418981;Lepidoptera;Coenonympha pamphilus;Coenonympha pamphilus;1;Coenonympha pamphilus;0.999999999999744;  
MH418982;Lepidoptera;Aglais urticae;Aglais urticae;0.001;Aglais urticae;0.990690600684087;  
MH418984;Lepidoptera;Coenonympha corinna;Coenonympha corinna;1;Coenonympha corinna;0.999999920013298;  
MH418985;Lepidoptera;Pieris napi;NA;0.011;Pieris napi;0.801985394724814;  
MH418986;Lepidoptera;Aricia agestis;NA;0.03;Aricia agestis;0.999295990875121;  
MH418987;Lepidoptera;Lycaena phlaeas;Lycaena phlaeas;1;Lycaena phlaeas;0.999999996363186;  
MH418989;Lepidoptera;Lasiommata megera;Lasiommata megera;1;Lasiommata megera;0.999379144055441;  
MH418990;Lepidoptera;Colias crocea;NA;0.059;NA;0.999999999999738;  
MH418992;Lepidoptera;Maniola cecilia;Pyronia cecilia;1;Pyronia cecilia;0.999999999999972;  
MH418995;Lepidoptera;Hipparchia statilinus;Hipparchia statilinus;1;Hipparchia statilinus;0.999999999999915;  
MH418997;Lepidoptera;Melitaea nevadensis;Melitaea celadussa;1;Melitaea celadussa;0.998328055835183;  
MH418998;Lepidoptera;Maniola cecilia;Pyronia cecilia;1;Pyronia cecilia;1;  
MH419000;Lepidoptera;Maniola cecilia;Pyronia cecilia;NA;Pyronia cecilia;1;  
MH419001;Lepidoptera;Aglais ichnusa;Aglais ichnusa;0.998;NA;0.999999996206876;  
MH419002;Lepidoptera;Lasiommata megera;Lasiommata megera;1;Lasiommata megera;0.999379144055441;  
MH419004;Lepidoptera;Lampides boeticus;Lampides boeticus;1;Lampides boeticus;0.99999999545906;  
MH419005;Lepidoptera;Vanessa atalanta;Vanessa atalanta;1;Vanessa atalanta;0.99999999757762;  
MH419006;Lepidoptera;Maniola cecilia;Pyronia cecilia;1;Pyronia cecilia;0.999999999999972;  
MH419007;Lepidoptera;Melitaea nevadensis;NA;0.001;Melitaea celadussa;0.727568537860761;  
MH419008;Lepidoptera;Maniola cecilia;Pyronia cecilia;NA;Pyronia cecilia;1;  
MH419011;Lepidoptera;Papilio machaon;Papilio machaon;0.003;Papilio machaon;0.999482752749035;  
MH419012;Lepidoptera;Coenonympha pamphilus;Coenonympha pamphilus;1;Coenonympha pamphilus;0.999999999995282;  
MH419013;Lepidoptera;Colias crocea;NA;0.059;NA;0.999999999999738;  
MH419015;Lepidoptera;Lasiommata paramegaera;Lasiommata paramegaera;0.999;Lasiommata paramegaera;0.995283446287531;  
MH419017;Lepidoptera;Callophrys rubi;NA;0.001;Callophrys rubi;0.998885705938309;  
MH419019;Lepidoptera;Papilio machaon;Papilio machaon;0.003;Papilio machaon;0.999482752749035;  
MH419020;Lepidoptera;Colias crocea;NA;0.059;NA;0.999999999999738;  
MH419021;Lepidoptera;Favonius quercus;NA;0.002;Favonius quercus;0.732659082125295;  
MH419023;Lepidoptera;Melitaea didyma;Melitaea didyma;1;Melitaea didyma;0.999946102605688;  
MH419024;Lepidoptera;Lampides boeticus;Lampides boeticus;1;Lampides boeticus;0.99999999545906;  
MH419025;Lepidoptera;Lampides boeticus;Lampides boeticus;1;Lampides boeticus;0.99999999545906;  
MH419027;Lepidoptera;Gonepteryx cleopatra;Gonepteryx cleopatra;0.998;Gonepteryx cleopatra;0.999118636582266;  
MH419028;Lepidoptera;Issoria lathonia;Issoria lathonia;1;Issoria lathonia;0.99999999989257;  
MH419032;Lepidoptera;Issoria lathonia;Issoria lathonia;1;Issoria lathonia;0.99999999989257;  
MH419033;Lepidoptera;Colias crocea;NA;0.059;NA;0.999999999999738;  
MH419035;Lepidoptera;Melitaea didyma;Melitaea didyma;1;Melitaea didyma;0.999755830950219;  
MH419037;Lepidoptera;Issoria lathonia;Issoria lathonia;1;Issoria lathonia;0.99999999987864;  
MH419039;Lepidoptera;Hipparchia neomiris;Hipparchia neomiris;1;Hipparchia neomiris;0.999999999999034;  
MH419041;Lepidoptera;Papilio machaon;Papilio machaon;0.003;Papilio machaon;0.999482752749035;  
MH419043;Lepidoptera;Lycaena phlaeas;Lycaena phlaeas;1;Lycaena phlaeas;0.999999997915609;  
MH419044;Lepidoptera;Pyrgus armoricanus;Pyrgus armoricanus;1;Pyrgus armoricanus;0.999997353848817;  
MH419045;Lepidoptera;Colias crocea;NA;0.059;NA;0.999999999999738;  
MH419047;Lepidoptera;Maniola cecilia;Pyronia cecilia;NA;Pyronia cecilia;1;  
MH419048;Lepidoptera;Thymelicus acteon;Thymelicus acteon;1;Thymelicus acteon;0.99999999752248;  
MH419049;Lepidoptera;Aricia agestis;NA;NA;Aricia agestis;0.996930365249266;  
MH419050;Lepidoptera;Pieris napi;NA;0.084;Pieris napi;0.885343420349066;  
MH419051;Lepidoptera;Coenonympha pamphilus;Coenonympha pamphilus;1;Coenonympha pamphilus;0.999999999999744;  
MH419052;Lepidoptera;Celastrina argiolus;Celastrina argiolus;1;Celastrina argiolus;0.999527385150531;  
MH419053;Lepidoptera;Hipparchia neomiris;Hipparchia neomiris;1;Hipparchia neomiris;0.999999999999801;  
MH419054;Lepidoptera;Colias crocea;NA;0.059;NA;0.999999999999738;  
MH419057;Lepidoptera;Lampides boeticus;Lampides boeticus;1;Lampides boeticus;0.99999999545906;  
MH419058;Lepidoptera;Papilio machaon;Papilio machaon;0.001;Papilio machaon;0.999463129150422;  
MH419060;Lepidoptera;Lycaena phlaeas;Lycaena phlaeas;1;Lycaena phlaeas;0.999999996363186;  
MH419062;Lepidoptera;Lasiommata megera;Lasiommata megera;1;Lasiommata megera;0.999806890129977;  
MH419065;Lepidoptera;Lycaena phlaeas;Lycaena phlaeas;1;Lycaena phlaeas;0.999999995520994;

MH419066;Lepidoptera;Maniola tithonus;Pyronia tithonus;1;Pyronia tithonus;1;  
MH419070;Lepidoptera;Carcharodus alceae;Carcharodus alceae;1;Carcharodus  
alceae;0.999999998465938;  
MH419071;Lepidoptera;Callophrys rubi;NA;0.001;Callophrys rubi;0.998885705938309;  
MH419072;Lepidoptera;Callophrys rubi;NA;0.001;Callophrys rubi;0.998885705938309;  
MH419079;Lepidoptera;Gonepteryx rhamni;NA;0.474;Gonepteryx rhamni;0.982076396127858;  
MH419081;Lepidoptera;Callophrys rubi;NA;0.001;Callophrys rubi;0.998885705938309;  
MH419083;Lepidoptera;Gonepteryx cleopatra;Gonepteryx cleopatra;0.998;Gonepteryx  
cleopatra;0.999118636582266;  
MH419086;Lepidoptera;Gegenes pumilio;Gegenes pumilio;0.999;Gegenes pumilio;0.999991412663101;  
MH419087;Lepidoptera;Aricia agestis;NA;NA;Aricia agestis;0.993980512246517;  
MH419088;Lepidoptera;Lasiommata megera;Lasiommata megera;1;Lasiommata megera;0.999379144055441;  
MH419091;Lepidoptera;Colias crocea;NA;NA;NA;0.99999999998525;  
MH419096;Lepidoptera;Lampides boeticus;Lampides boeticus;1;Lampides boeticus;0.99999999545906;  
MH419097;Lepidoptera;Carcharodus alceae;Carcharodus alceae;1;Carcharodus  
alceae;0.999999990863188;  
MH419098;Lepidoptera;Celastrina argiolus;Celastrina argiolus;1;Celastrina  
argiolus;0.999037794018796;  
MH419100;Lepidoptera;Thymelicus acteon;Thymelicus acteon;1;Thymelicus acteon;0.99999999752248;  
MH419102;Lepidoptera;Carcharodus alceae;Carcharodus alceae;1;Carcharodus  
alceae;0.999999998465938;  
MH419103;Lepidoptera;Lasiommata megera;Lasiommata megera;1;Lasiommata megera;0.999379144055441;  
MH419104;Lepidoptera;Maniola cecilia;Pyronia cecilia;NA;Pyronia cecilia;1;  
MH419105;Lepidoptera;Colias crocea;NA;0.059;NA;0.99999999999738;  
MH419107;Lepidoptera;Callophrys rubi;NA;0.001;Callophrys rubi;0.998885705938309;  
MH419108;Lepidoptera;Vanessa atalanta;Vanessa atalanta;1;Vanessa atalanta;0.99999999757762;  
MH419109;Lepidoptera;Maniola jurtina;NA;0.169;NA;0.99999999999053;  
MH419111;Lepidoptera;Anthocharis cardamines;Anthocharis cardamines;1;Anthocharis  
cardamines;0.999999940675226;  
MH419113;Lepidoptera;Lampides boeticus;Lampides boeticus;1;Lampides boeticus;0.99999999545906;  
MH419115;Lepidoptera;Lasiommata paramegaera;Lasiommata paramegaera;0.999;Lasiommata  
paramegaera;0.995283446287531;  
MH419117;Lepidoptera;Lampides boeticus;Lampides boeticus;1;Lampides boeticus;0.99999999620769;  
MH419119;Lepidoptera;Lampides boeticus;Lampides boeticus;1;Lampides boeticus;0.99999999545906;  
MH419120;Lepidoptera;Anthocharis cardamines;Anthocharis cardamines;1;Anthocharis  
cardamines;0.999999987224612;  
MH419121;Lepidoptera;Melitaea nevadensis;Melitaea celadussa;1;Melitaea  
celadussa;0.99883216908598;  
MH419122;Lepidoptera;Lasiommata megera;Lasiommata megera;0.999;Lasiommata  
megera;0.999423486493351;  
MH419123;Lepidoptera;Celastrina argiolus;Celastrina argiolus;1;Celastrina  
argiolus;0.999527385150531;  
MH419124;Lepidoptera;Pieris napi;NA;0.066;Pieris napi;0.832895481558215;  
MH419125;Lepidoptera;Lasiommata megera;Lasiommata megera;1;Lasiommata megera;0.999379144055441;  
MH419126;Lepidoptera;Hipparchia statilinus;Hipparchia statilinus;1;Hipparchia  
statilinus;0.99999999999943;  
MH419127;Lepidoptera;Carcharodus alceae;Carcharodus alceae;1;Carcharodus  
alceae;0.999999990863188;  
MH419128;Lepidoptera;Hipparchia statilinus;Hipparchia statilinus;1;Hipparchia  
statilinus;0.99999999999915;  
MH419129;Lepidoptera;Callophrys rubi;NA;0.019;Callophrys rubi;0.998201459637982;  
MH419130;Lepidoptera;Pieris napi;NA;0.011;Pieris napi;0.801985394724814;  
MH419133;Lepidoptera;Anthocharis cardamines;Anthocharis cardamines;1;Anthocharis  
cardamines;0.999999987200425;  
MH419140;Lepidoptera;Carcharodus alceae;Carcharodus alceae;0.003;Carcharodus  
alceae;0.999999959808407;  
MH419141;Lepidoptera;Coenonympha pamphilus;Coenonympha pamphilus;1;Coenonympha  
pamphilus;0.99999999999829;  
MH419142;Lepidoptera;Celastrina argiolus;Celastrina argiolus;1;Celastrina  
argiolus;0.999527385150531;  
MH419143;Lepidoptera;Lasiommata paramegaera;Lasiommata paramegaera;0.999;Lasiommata  
paramegaera;0.995283446287531;  
MH419145;Lepidoptera;Carcharodus alceae;Carcharodus alceae;0.999;Carcharodus  
alceae;0.999999996339511;  
MH419146;Lepidoptera;Carcharodus alceae;Carcharodus alceae;1;Carcharodus  
alceae;0.999999998465938;  
MH419148;Lepidoptera;Carcharodus alceae;Carcharodus alceae;1;Carcharodus  
alceae;0.999999994142229;  
MH419149;Lepidoptera;Callophrys rubi;NA;0.011;Callophrys rubi;0.997712979651619;  
MH419150;Lepidoptera;Maniola cecilia;Pyronia cecilia;1;Pyronia cecilia;1;  
MH419152;Lepidoptera;Lasiommata paramegaera;Lasiommata paramegaera;0.999;Lasiommata  
paramegaera;0.995283446287531;  
MH419153;Lepidoptera;Favonius quercus;NA;0.086;Favonius quercus;0.870751085723328;  
MH419154;Lepidoptera;Coenonympha corinna;Coenonympha corinna;1;Coenonympha  
corinna;0.99999999995879;  
MH419155;Lepidoptera;Melitaea nevadensis;Melitaea celadussa;0.964;Melitaea  
celadussa;0.989024329521702;  
MH419156;Lepidoptera;Callophrys rubi;NA;0.001;Callophrys rubi;0.998885705938309;

MH419157;Lepidoptera;Maniola cecilia;Pyronia cecilia;1;Pyronia cecilia;1;  
MH419158;Lepidoptera;Argynnis paphia;Argynnis paphia;1;Argynnis paphia;0.999999991389927;  
MH419159;Lepidoptera;Charaxes jasius;Charaxes jasius;NA;Charaxes jasius;0.990397821479112;  
MH419162;Lepidoptera;Lasiommata megera;Lasiommata megera;1;Lasiommata megera;0.999806890129977;  
MH419163;Lepidoptera;Coenonympha corinna;Coenonympha corinna;1;Coenonympha  
corinna;0.99999853807008;  
MH419164;Lepidoptera;Celastrina argiolus;Celastrina argiolus;1;Celastrina  
argiolus;0.999631157817044;  
MH419166;Lepidoptera;Coenonympha pamphilus;Coenonympha pamphilus;1;Coenonympha  
pamphilus;0.99999999997527;  
MH419167;Lepidoptera;Vanessa atalanta;Vanessa atalanta;1;Vanessa atalanta;0.99999999647542;  
MH419168;Lepidoptera;Lasiommata megera;Lasiommata megera;1;Lasiommata megera;0.999379144055441;  
MH419169;Lepidoptera;Lasiommata paramegaera;Lasiommata paramegaera;0.999;Lasiommata  
paramegaera;0.995283446287531;  
MH419171;Lepidoptera;Colias crocea;NA;0.059;NA;0.99999999999738;  
MH419174;Lepidoptera;Lasiommata megera;Lasiommata megera;1;Lasiommata megera;0.999379144055441;  
MH419179;Lepidoptera;Coenonympha corinna;Coenonympha corinna;1;Coenonympha  
corinna;0.99999556334798;  
MH419180;Lepidoptera;Colias crocea;NA;0.059;NA;0.99999999999738;  
MH419182;Lepidoptera;Callophrys rubi;Callophrys rubi;0.006;Callophrys rubi;0.998441800271511;  
MH419183;Lepidoptera;Pyrgus armoricanus;Pyrgus armoricanus;1;Pyrgus  
armoricanus;0.999997353848817;  
MH419184;Lepidoptera;Argynnis paphia;Argynnis paphia;1;Argynnis paphia;0.999999991389927;  
MH419189;Lepidoptera;Coenonympha corinna;Coenonympha corinna;1;Coenonympha  
corinna;0.99999999995879;  
MH419190;Lepidoptera;Hipparchia neomiris;Hipparchia neomiris;1;Hipparchia  
neomiris;0.999999999999801;  
MH419191;Lepidoptera;Gegenes pumilio;Gegenes pumilio;1;Gegenes pumilio;0.999986726679266;  
MH419192;Lepidoptera;Coenonympha pamphilus;Coenonympha pamphilus;1;Coenonympha  
pamphilus;0.99999999999744;  
MH419193;Lepidoptera;Lampides boeticus;Lampides boeticus;1;Lampides boeticus;0.99999999658513;  
MH419194;Lepidoptera;Gegenes pumilio;Gegenes pumilio;0.006;Gegenes pumilio;0.999976928027983;  
MH419195;Lepidoptera;Anthocharis cardamines;Anthocharis cardamines;1;Anthocharis  
cardamines;0.999999986709838;  
MH419196;Lepidoptera;Colias crocea;NA;0.059;NA;0.99999999999738;  
MH419197;Lepidoptera;Coenonympha corinna;Coenonympha corinna;1;Coenonympha  
corinna;0.999999999960579;  
MH419198;Lepidoptera;Gonepteryx cleopatra;Gonepteryx cleopatra;0.998;Gonepteryx  
cleopatra;0.999118636582266;  
MH419200;Lepidoptera;Pieris napi;NA;0.017;Pieris napi;0.773618468477091;  
MH419201;Lepidoptera;Lasiommata megera;Lasiommata megera;1;Lasiommata megera;0.999379144055441;  
MH419204;Lepidoptera;Gonepteryx rhamni;NA;0.194;Gonepteryx rhamni;0.99583141915324;  
MH419209;Lepidoptera;Maniola tithonus;Pyronia tithonus;1;Pyronia tithonus;0.99999999999972;  
MH419211;Lepidoptera;Pieris napi;NA;NA;Pieris napi;0.883162684455157;  
MH419213;Lepidoptera;Anthocharis cardamines;Anthocharis cardamines;1;Anthocharis  
cardamines;0.999999943434575;  
MH419214;Lepidoptera;Argynnis paphia;Argynnis paphia;1;Argynnis paphia;0.999999991389927;  
MH419215;Lepidoptera;Maniola tithonus;Pyronia tithonus;1;Pyronia tithonus;1;  
MH419216;Lepidoptera;Celastrina argiolus;Celastrina argiolus;1;Celastrina  
argiolus;0.999527385150531;  
MH419217;Lepidoptera;Lasiommata paramegaera;Lasiommata paramegaera;0.999;Lasiommata  
paramegaera;0.995283446287531;  
MH419218;Lepidoptera;Gegenes pumilio;NA;0.92;Gegenes pumilio;0.999975451721427;  
MH419220;Lepidoptera;Gegenes pumilio;Gegenes pumilio;1;Gegenes pumilio;0.999986726679266;  
MH419222;Lepidoptera;Lycaena phlaeas;Lycaena phlaeas;1;Lycaena phlaeas;0.99999996363186;  
MH419223;Lepidoptera;Vanessa cardui;Vanessa cardui;1;Vanessa cardui;0.999999370067598;  
MH419225;Lepidoptera;Satyrium ilicis;Satyrium ilicis;1;Satyrium ilicis;0.99999987901305;  
MH419226;Lepidoptera;Maniola cecilia;Pyronia cecilia;1;Pyronia cecilia;0.99999999999972;  
MH419227;Lepidoptera;Maniola tithonus;Pyronia tithonus;1;Pyronia tithonus;1;  
MH419228;Lepidoptera;Lampides boeticus;Lampides boeticus;1;Lampides boeticus;0.99999999545906;  
MH419230;Lepidoptera;Celastrina argiolus;Celastrina argiolus;1;Celastrina  
argiolus;0.999527385150531;  
MH419231;Lepidoptera;Coenonympha pamphilus;Coenonympha pamphilus;1;Coenonympha  
pamphilus;0.99999999999744;  
MH419235;Lepidoptera;Maniola jurtina;NA;0.038;NA;0.99999999999524;  
MH419236;Lepidoptera;Colias crocea;NA;0.059;NA;0.99999999999738;  
MH419237;Lepidoptera;Maniola cecilia;Pyronia cecilia;NA;Pyronia cecilia;1;  
MH419241;Lepidoptera;Colias crocea;NA;0.059;NA;0.99999999999738;  
MH419242;Lepidoptera;Celastrina argiolus;Celastrina argiolus;1;Celastrina  
argiolus;0.999527385150531;  
MH419243;Lepidoptera;Gegenes pumilio;Gegenes pumilio;1;Gegenes pumilio;0.999986726679266;  
MH419244;Lepidoptera;Celastrina argiolus;Celastrina argiolus;1;Celastrina  
argiolus;0.999527385150531;  
MH419245;Lepidoptera;Pieris napi;NA;0.028;Pieris napi;0.888205720664699;  
MH419246;Lepidoptera;Lycaena phlaeas;Lycaena phlaeas;1;Lycaena phlaeas;0.999999996363186;  
MH419247;Lepidoptera;Coenonympha pamphilus;Coenonympha pamphilus;1;Coenonympha  
pamphilus;0.99999999999744;  
MH419249;Lepidoptera;Papilio machaon;Papilio machaon;0.003;Papilio machaon;0.997288237409893;

MH419250;Lepidoptera;Colias crocea;NA;0.059;NA;0.99999999999738;  
MH419252;Lepidoptera;Anthocharis cardamines;Anthocharis cardamines;1;Anthocharis  
cardamines;0.99999997953563;  
MH419254;Lepidoptera;Celastrina argiolus;Celastrina argiolus;1;Celastrina  
argiolus;0.999527385150531;  
MH419255;Lepidoptera;Callophrys rubi;NA;0.019;Callophrys rubi;0.998201459637982;  
MH419256;Lepidoptera;Maniola cecilia;Pyronia cecilia;NA;Pyronia cecilia;1;  
MH419258;Lepidoptera;Lycaena phlaeas;Lycaena phlaeas;1;Lycaena phlaeas;0.999999998167567;  
MH419259;Lepidoptera;Maniola jurtina;NA;0.038;NA;0.99999999999524;  
MH419262;Lepidoptera;Pieris napi;NA;NA;Pieris napi;0.88800510213663;  
MH419263;Lepidoptera;Colias crocea;NA;0.059;NA;0.99999999999738;  
MH419266;Lepidoptera;Papilio machaon;Papilio machaon;0.001;Papilio machaon;0.999463129150422;  
MH419267;Lepidoptera;Pieris napi;Pieris napi;0.004;Pieris napi;0.920488351592687;  
MH419269;Lepidoptera;Lasiommata megera;Lasiommata megera;1;Lasiommata megera;0.999379144055441;  
MH419270;Lepidoptera;Pyrgus armoricanus;Pyrgus armoricanus;1;Pyrgus  
armoricanus;0.999997353848817;  
MH419272;Lepidoptera;Thymelicus acteon;Thymelicus acteon;1;Thymelicus acteon;0.9999999752248;  
MH419273;Lepidoptera;Lasiommata megera;Lasiommata megera;1;Lasiommata megera;0.999379144055441;  
MH419274;Lepidoptera;Lasiommata megera;Lasiommata megera;1;Lasiommata megera;0.999379144055441;  
MH419276;Lepidoptera;Glaucopsyche alexis;NA;NA;Glaucopsyche alexis;0.899237597871183;  
MH419277;Lepidoptera;Coenonympha pamphilus;Coenonympha pamphilus;1;Coenonympha  
pamphilus;0.99999999999744;  
MH419278;Lepidoptera;Vanessa atalanta;Vanessa atalanta;1;Vanessa atalanta;0.99999998973152;  
MH419279;Lepidoptera;Thymelicus acteon;Thymelicus acteon;1;Thymelicus acteon;0.99999995239193;  
MH419280;Lepidoptera;Lasiommata megera;Lasiommata megera;1;Lasiommata megera;0.999379144055441;  
MH419281;Lepidoptera;Maniola jurtina;NA;0.001;Maniola jurtina;0.939220105860875;  
MH419282;Lepidoptera;Pieris napi;NA;0.011;Pieris napi;0.801985394724814;  
MH419283;Lepidoptera;Pyrgus armoricanus;Pyrgus armoricanus;1;Pyrgus  
armoricanus;0.999997353848817;  
MH419284;Lepidoptera;Lycaena phlaeas;Lycaena phlaeas;1;Lycaena phlaeas;0.99999996363186;  
MH419286;Lepidoptera;Carcharodus alceae;Carcharodus alceae;0.001;Carcharodus  
alceae;0.999999994870137;  
MH419287;Lepidoptera;Coenonympha corinna;Coenonympha corinna;1;Coenonympha  
corinna;0.9999999942446;  
MH419288;Lepidoptera;Carcharodus alceae;Carcharodus alceae;0.999;Carcharodus  
alceae;0.99999998008462;  
MH419289;Lepidoptera;Glaucopsyche alexis;Glaucopsyche alexis;0.001;Glaucopsyche  
alexis;0.94042380088325;  
MH419292;Lepidoptera;Issoria lathonia;Issoria lathonia;1;Issoria lathonia;0.99999999989257;  
MH419294;Lepidoptera;Colias crocea;NA;0.059;NA;0.99999999999738;  
MH419295;Lepidoptera;Maniola cecilia;Pyronia cecilia;1;Pyronia cecilia;1;  
MH419296;Lepidoptera;Plebejus idas;NA;0.001;NA;0.994620093546684;  
MH419300;Lepidoptera;Issoria lathonia;Issoria lathonia;1;Issoria lathonia;0.99999999989257;  
MH419301;Lepidoptera;Maniola cecilia;Pyronia cecilia;NA;Pyronia cecilia;1;  
MH419302;Lepidoptera;Colias crocea;NA;0.059;NA;0.99999999999738;  
MH419303;Lepidoptera;Charaxes jasius;Charaxes jasius;0.001;Charaxes jasius;0.992442307611551;  
MH419304;Lepidoptera;Colias crocea;NA;0.059;NA;0.99999999999738;  
MH419305;Lepidoptera;Coenonympha pamphilus;Coenonympha pamphilus;1;Coenonympha  
pamphilus;0.99999999999744;  
MH419306;Lepidoptera;Colias crocea;NA;0.059;NA;0.99999999999738;  
MH419309;Lepidoptera;Gegenes pumilio;Gegenes pumilio;1;Gegenes pumilio;0.999986726679266;  
MH419311;Lepidoptera;Charaxes jasius;Charaxes jasius;NA;Charaxes jasius;0.990397821479112;  
MH419312;Lepidoptera;Vanessa cardui;Vanessa cardui;1;Vanessa cardui;0.999999459983318;  
MH419314;Lepidoptera;Papilio machaon;Papilio machaon;NA;Papilio machaon;0.996538843275905;  
MH419317;Lepidoptera;Lasiommata paramegaera;Lasiommata paramegaera;0.999;Lasiommata  
paramegaera;0.995283446287531;  
MH419318;Lepidoptera;Carcharodus alceae;Carcharodus alceae;1;Carcharodus  
alceae;0.99999998465938;  
MH419319;Lepidoptera;Maniola cecilia;Pyronia cecilia;1;Pyronia cecilia;0.99999999999972;  
MH419321;Lepidoptera;Thymelicus acteon;Thymelicus acteon;1;Thymelicus acteon;0.99999996091617;  
MH419323;Lepidoptera;Lycaena phlaeas;Lycaena phlaeas;1;Lycaena phlaeas;0.99999998167567;  
MH419324;Lepidoptera;Celastrina argiolus;Celastrina argiolus;1;Celastrina  
argiolus;0.999527385150531;  
MH419325;Lepidoptera;Aricia agestis;NA;0.067;Aricia agestis;0.999509743227786;  
MH419327;Lepidoptera;Pyrgus armoricanus;Pyrgus armoricanus;1;Pyrgus  
armoricanus;0.999997353848817;  
MH419330;Lepidoptera;Celastrina argiolus;Celastrina argiolus;1;Celastrina  
argiolus;0.999037794018796;  
MH419336;Lepidoptera;Maniola cecilia;Pyronia cecilia;NA;Pyronia cecilia;1;  
MH419337;Lepidoptera;Lycaena phlaeas;Lycaena phlaeas;1;Lycaena phlaeas;0.99999996363186;  
MH419338;Lepidoptera;Lycaena phlaeas;Lycaena phlaeas;1;Lycaena phlaeas;0.99999996363186;  
MH419339;Lepidoptera;Hipparchia neomiris;Hipparchia neomiris;1;Hipparchia  
neomiris;0.99999999999915;  
MH419343;Lepidoptera;Anthocharis cardamines;Anthocharis cardamines;1;Anthocharis  
cardamines;0.99999984567239;  
MH419344;Lepidoptera;Vanessa atalanta;Vanessa atalanta;1;Vanessa atalanta;0.99999999383476;  
MH419345;Lepidoptera;Lampides boeticus;Lampides boeticus;1;Lampides boeticus;0.99999999281187;



MH419346;Lepidoptera;Celastrina argiolus;Celastrina argiolus;1;Celastrina argiolus;0.999037794018796;  
MH419347;Lepidoptera;Coenonympha pamphilus;Coenonympha pamphilus;1;Coenonympha pamphilus;0.99999999999744;  
MH419348;Lepidoptera;Maniola cecilia;Pyronia cecilia;NA;Pyronia cecilia;1;  
MH419350;Lepidoptera;Colias crocea;NA;0.059;NA;0.99999999999738;  
MH419353;Lepidoptera;Celastrina argiolus;Celastrina argiolus;1;Celastrina argiolus;0.999527385150531;  
MH419354;Lepidoptera;Lasiommata megera;Lasiommata megera;1;Lasiommata megera;0.999379144055441;  
MH419355;Lepidoptera;Pyrgus armoricanus;Pyrgus armoricanus;1;Pyrgus armoricanus;0.999997353848817;  
MH419357;Lepidoptera;Lycaena phlaeas;Lycaena phlaeas;1;Lycaena phlaeas;0.999999996363186;  
MH419362;Lepidoptera;Vanessa cardui;Vanessa cardui;1;Vanessa cardui;0.99999803450484;  
MH419369;Lepidoptera;Glaucopsyche alexis;Glaucopsyche alexis;0.001;Glaucopsyche alexis;0.93829838869861;  
MH419370;Lepidoptera;Lasiommata megera;Lasiommata megera;1;Lasiommata megera;0.999379144055441;  
MH419372;Lepidoptera;Gonepteryx rhamni;NA;0.474;Gonepteryx rhamni;0.982076396127858;  
MH419373;Lepidoptera;Lampides boeticus;Lampides boeticus;1;Lampides boeticus;0.99999998557229;  
MH419375;Lepidoptera;Vanessa cardui;Vanessa cardui;1;Vanessa cardui;0.999998479972181;  
MH419377;Lepidoptera;Lasiommata megera;Lasiommata megera;1;Lasiommata megera;0.999379144055441;  
MH419381;Lepidoptera;Maniola cecilia;Pyronia cecilia;1;Pyronia cecilia;1;  
MH419382;Lepidoptera;Colias crocea;NA;0.059;NA;0.99999999999738;  
MH419384;Lepidoptera;Gonepteryx cleopatra;Gonepteryx cleopatra;0.998;Gonepteryx cleopatra;0.999118636582266;  
MH419385;Lepidoptera;Lampides boeticus;Lampides boeticus;1;Lampides boeticus;0.99999998728612;  
MH419386;Lepidoptera;Lasiommata megera;Lasiommata megera;1;Lasiommata megera;0.999379144055441;  
MH419387;Lepidoptera;Coenonympha pamphilus;Coenonympha pamphilus;1;Coenonympha pamphilus;0.99999999999744;  
MH419388;Lepidoptera;Maniola tithonus;Pyronia tithonus;1;Pyronia tithonus;1;  
MH419389;Lepidoptera;Lycaena phlaeas;Lycaena phlaeas;1;Lycaena phlaeas;0.999999996363186;  
MH419392;Lepidoptera;Melitaea didyma;Melitaea didyma;1;Melitaea didyma;0.999945816868155;  
MH419394;Lepidoptera;Gonepteryx cleopatra;Gonepteryx cleopatra;0.998;Gonepteryx cleopatra;0.999118636582266;  
MH419396;Lepidoptera;Gegenes pumilio;Gegenes pumilio;1;Gegenes pumilio;0.999986726679266;  
MH419397;Lepidoptera;Lampides boeticus;Lampides boeticus;1;Lampides boeticus;0.99999999561368;  
MH419400;Lepidoptera;Pieris napi;Pieris napi;NA;Pieris napi;0.939506750684135;  
MH419401;Lepidoptera;Carcharodus alceae;Carcharodus alceae;0.001;Carcharodus alceae;0.999999997849443;  
MH419402;Lepidoptera;Gonepteryx cleopatra;Gonepteryx cleopatra;0.998;Gonepteryx cleopatra;0.999118636582266;  
MH419404;Lepidoptera;Coenonympha pamphilus;Coenonympha pamphilus;1;Coenonympha pamphilus;0.99999999981668;  
MH419405;Lepidoptera;Maniola cecilia;Pyronia cecilia;NA;Pyronia cecilia;1;  
MH419407;Lepidoptera;Gonepteryx cleopatra;Gonepteryx cleopatra;0.998;Gonepteryx cleopatra;0.999118636582266;  
MH419408;Lepidoptera;Favonius quercus;NA;0.002;Favonius quercus;0.732659082125295;  
MH419412;Lepidoptera;Gonepteryx cleopatra;Gonepteryx cleopatra;0.999;Gonepteryx cleopatra;0.99900166502855;  
MH419413;Lepidoptera;Coenonympha pamphilus;Coenonympha pamphilus;1;Coenonympha pamphilus;0.99999999999744;  
MH419414;Lepidoptera;Callophrys rubi;NA;0.019;Callophrys rubi;0.998201459637982;  
MH419417;Lepidoptera;Aglais ichnusa;Aglais ichnusa;0.998;NA;0.999999996206876;  
MH419419;Lepidoptera;Coenonympha pamphilus;Coenonympha pamphilus;1;Coenonympha pamphilus;0.99999999999432;  
MH419420;Lepidoptera;Lampides boeticus;Lampides boeticus;1;Lampides boeticus;0.99999999690317;  
MH419421;Lepidoptera;Coenonympha pamphilus;Coenonympha pamphilus;1;Coenonympha pamphilus;0.99999999999744;  
MH419422;Lepidoptera;Satyrium ilicis;Satyrium ilicis;1;Satyrium ilicis;0.999999987901305;  
MH419425;Lepidoptera;Papilio machaon;NA;0.004;Papilio machaon;0.786457751316236;  
MH419426;Lepidoptera;Aricia agestis;NA;0.095;Aricia agestis;0.998129958002497;  
MH419428;Lepidoptera;Coenonympha pamphilus;Coenonympha pamphilus;1;Coenonympha pamphilus;0.99999999999829;  
MH419429;Lepidoptera;Maniola cecilia;Pyronia cecilia;NA;Pyronia cecilia;1;  
MH419432;Lepidoptera;Coenonympha pamphilus;Coenonympha pamphilus;1;Coenonympha pamphilus;0.99999999995282;  
MH419433;Lepidoptera;Aricia agestis;NA;0.067;Aricia agestis;0.999509743227786;  
MH419434;Lepidoptera;Lasiommata paramegaera;Lasiommata paramegaera;0.999;Lasiommata paramegaera;0.995283446287531;  
MH419435;Lepidoptera;Pieris napi;NA;0.011;Pieris napi;0.801985394724814;  
MH419438;Lepidoptera;Gonepteryx cleopatra;Gonepteryx cleopatra;0.998;Gonepteryx cleopatra;0.999118636582266;  
MH419439;Lepidoptera;Lampides boeticus;Lampides boeticus;NA;Lampides boeticus;0.9999999990861;  
MH419440;Lepidoptera;Argynnis paphia;Argynnis paphia;1;Argynnis paphia;0.999999991389927;  
MH419441;Lepidoptera;Carcharodus alceae;Carcharodus alceae;1;Carcharodus alceae;0.999999996405506;  
MH419443;Lepidoptera;Melitaea didyma;Melitaea didyma;1;Melitaea didyma;0.999945816868155;  
MH419444;Lepidoptera;Celastrina argiolus;Celastrina argiolus;1;Celastrina argiolus;0.999652809829397;

MH419445;Lepidoptera;Pyrgus armoricanus;Pyrgus armoricanus;1;Pyrgus armoricanus;0.999997353848817;  
MH419446;Lepidoptera;Anthocharis cardamines;Anthocharis cardamines;1;Anthocharis cardamines;0.99999907874159;  
MH419448;Lepidoptera;Lasiommata megera;Lasiommata megera;1;Lasiommata megera;0.999379144055441;  
MH419451;Lepidoptera;Carcharodus alceae;Carcharodus alceae;1;Carcharodus alceae;0.99999998465938;  
MH419454;Lepidoptera;Celastrina argiolus;Celastrina argiolus;1;Celastrina argiolus;0.999631157817044;  
MH419458;Lepidoptera;Papilio machaon;Papilio machaon;0.001;Papilio machaon;0.998357199376497;  
MH419459;Lepidoptera;Maniola tithonus;Pyronia tithonus;1;Pyronia tithonus;1;  
MH419461;Lepidoptera;Papilio machaon;Papilio machaon;0.003;Papilio machaon;0.999482752749035;  
MH419462;Lepidoptera;Vanessa atalanta;Vanessa atalanta;1;Vanessa atalanta;0.99999999489717;  
MH419463;Lepidoptera;Argynnis paphia;Argynnis paphia;1;Argynnis paphia;0.99999991389927;  
MH419464;Lepidoptera;Aricia cramera;Aricia cramera;1;Aricia cramera;0.999993731037033;  
MH419466;Lepidoptera;Maniola cecilia;Pyronia cecilia;NA;Pyronia cecilia;1;  
MH419467;Lepidoptera;Charaxes jasius;Charaxes jasius;NA;Charaxes jasius;0.990397821479112;  
MH419470;Lepidoptera;Aricia agestis;Aricia agestis;1;Aricia agestis;0.988437755993415;  
MH419471;Lepidoptera;Lasiommata megera;Lasiommata megera;1;Lasiommata megera;0.999379144055441;  
MH419472;Lepidoptera;Coenonympha pamphilus;Coenonympha pamphilus;1;Coenonympha pamphilus;0.99999999999744;  
MH419473;Lepidoptera;Favonius quercus;NA;0.002;Favonius quercus;0.732659082125295;  
MH419476;Lepidoptera;Coenonympha pamphilus;Coenonympha pamphilus;1;Coenonympha pamphilus;0.99999999999403;  
MH419477;Lepidoptera;Coenonympha pamphilus;Coenonympha pamphilus;1;Coenonympha pamphilus;0.99999999999744;  
MH419478;Lepidoptera;Charaxes jasius;Charaxes jasius;NA;Charaxes jasius;0.979798503826812;  
MH419480;Lepidoptera;Aglais ichnusa;Aglais ichnusa;0.998;NA;0.999999996206876;  
MH419481;Lepidoptera;Lampides boeticus;Lampides boeticus;1;Lampides boeticus;0.99999999545906;  
MH419482;Lepidoptera;Lasiommata paramegaera;Lasiommata paramegaera;0.999;Lasiommata paramegaera;0.995283446287531;  
MH419484;Lepidoptera;Lampides boeticus;Lampides boeticus;1;Lampides boeticus;0.999999998557229;  
MH419485;Lepidoptera;Lasiommata paramegaera;Lasiommata paramegaera;0.999;Lasiommata paramegaera;0.995283446287531;  
MH419486;Lepidoptera;Coenonympha pamphilus;Coenonympha pamphilus;1;Coenonympha pamphilus;0.99999999999744;  
MH419487;Lepidoptera;Argynnis paphia;Argynnis paphia;1;Argynnis paphia;0.999999991389927;  
MH419488;Lepidoptera;Colias crocea;NA;0.059;NA;0.99999999999738;  
MH419489;Lepidoptera;Maniola tithonus;Pyronia tithonus;1;Pyronia tithonus;1;  
MH419490;Lepidoptera;Gonepteryx cleopatra;Gonepteryx cleopatra;0.998;Gonepteryx cleopatra;0.999118636582266;  
MH419492;Lepidoptera;Carcharodus alceae;Carcharodus alceae;1;Carcharodus alceae;0.99999998465938;  
MH419493;Lepidoptera;Coenonympha pamphilus;Coenonympha pamphilus;1;Coenonympha pamphilus;0.99999999999744;  
MH419494;Lepidoptera;Melitaea didyma;Melitaea didyma;1;Melitaea didyma;0.999945816868155;  
MH419495;Lepidoptera;Lasiommata megera;Lasiommata megera;1;Lasiommata megera;0.999379144055441;  
MH419496;Lepidoptera;Carcharodus alceae;Carcharodus alceae;1;Carcharodus alceae;0.999999990863188;  
MH419499;Lepidoptera;Gegenes pumilio;Gegenes pumilio;1;Gegenes pumilio;0.999986726679266;  
MH419500;Lepidoptera;Charaxes jasius;Charaxes jasius;0.001;Charaxes jasius;0.990234369397197;  
MH419501;Lepidoptera;Coenonympha pamphilus;Coenonympha pamphilus;1;Coenonympha pamphilus;0.99999999983061;  
MH419504;Lepidoptera;Maniola tithonus;Pyronia tithonus;1;Pyronia tithonus;1;  
MH419508;Lepidoptera;Maniola cecilia;Pyronia cecilia;1;Pyronia cecilia;1;  
MH419510;Lepidoptera;Carcharodus alceae;Carcharodus alceae;0.999;Carcharodus alceae;0.99999996339511;  
MH419511;Lepidoptera;Colias crocea;NA;0.059;NA;0.99999999999738;  
MH419512;Lepidoptera;Aglais ichnusa;Aglais ichnusa;0.003;NA;0.999999990022183;  
MH419513;Lepidoptera;Coenonympha pamphilus;Coenonympha pamphilus;1;Coenonympha pamphilus;0.99999999999488;  
MH419515;Lepidoptera;Melitaea nevadensis;NA;0.014;Melitaea celadussa;0.797886056890592;  
MH419516;Lepidoptera;Gonepteryx cleopatra;Gonepteryx cleopatra;0.998;Gonepteryx cleopatra;0.999118636582266;  
MH419518;Lepidoptera;Pyrgus armoricanus;Pyrgus armoricanus;1;Pyrgus armoricanus;0.999997353848817;  
MH419519;Lepidoptera;Maniola tithonus;Pyronia tithonus;1;Pyronia tithonus;1;  
MH419522;Lepidoptera;Coenonympha pamphilus;Coenonympha pamphilus;1;Coenonympha pamphilus;0.99999999999744;  
MH419524;Lepidoptera;Gonepteryx cleopatra;Gonepteryx cleopatra;0.998;Gonepteryx cleopatra;0.999118636582266;  
MH419527;Lepidoptera;Celastrina argiolus;Celastrina argiolus;1;Celastrina argiolus;0.999660808952023;  
MH419528;Lepidoptera;Colias crocea;NA;0.059;NA;0.99999999999738;  
MH419531;Lepidoptera;Hipparchia statilinus;Hipparchia statilinus;1;Hipparchia statilinus;0.999999999999943;  
MH419532;Lepidoptera;Callophrys rubi;NA;0.003;Callophrys rubi;0.996753822785804;  
MH419533;Lepidoptera;Callophrys rubi;NA;0.019;Callophrys rubi;0.998201459637982;

MH419534;Lepidoptera;Papilio machaon;Papilio machaon;NA;Papilio machaon;0.99931256565874;  
MH419535;Lepidoptera;Melitaea didyma;Melitaea didyma;1;Melitaea didyma;0.999945824175549;  
MH419538;Lepidoptera;Coenonympha corinna;Coenonympha corinna;1;Coenonympha  
corinna;0.99999999567109;  
MH419542;Lepidoptera;Carcharodus alceae;Carcharodus alceae;0.006;Carcharodus  
alceae;0.999999965990839;  
MH419543;Lepidoptera;Lasiommata paramegaera;Lasiommata paramegaera;0.999;Lasiommata  
paramegaera;0.995283446287531;  
MH419545;Lepidoptera;Hipparchia neomiris;Hipparchia neomiris;1;Hipparchia  
neomiris;0.99999999999801;  
MH419546;Lepidoptera;Vanessa cardui;Vanessa cardui;1;Vanessa cardui;0.999999160963125;  
MH419547;Lepidoptera;Callophrys rubi;NA;0.001;Callophrys rubi;0.998885705938309;  
MH419548;Lepidoptera;Papilio machaon;Papilio machaon;0.003;Papilio machaon;0.999482752749035;  
MH419549;Lepidoptera;Vanessa atalanta;Vanessa atalanta;1;Vanessa atalanta;0.99999999757762;  
MH419550;Lepidoptera;Coenonympha corinna;Coenonympha corinna;1;Coenonympha  
corinna;0.99999999995879;  
MH419552;Lepidoptera;Callophrys rubi;NA;0.003;Callophrys rubi;0.996753822785804;  
MH419553;Lepidoptera;Lasiommata paramegaera;Lasiommata paramegaera;0.999;Lasiommata  
paramegaera;0.995283446287531;  
MH419555;Lepidoptera;Lycaena phlaeas;Lycaena phlaeas;1;Lycaena phlaeas;0.999999997206857;  
MH419556;Lepidoptera;Carcharodus alceae;Carcharodus alceae;0.999;Carcharodus  
alceae;0.99999998008462;  
MH419557;Lepidoptera;Lampides boeticus;Lampides boeticus;1;Lampides boeticus;0.99999998355293;  
MH419561;Lepidoptera;Colias crocea;NA;0.059;NA;0.99999999999738;  
MH419563;Lepidoptera;Pieris napi;NA;0.011;Pieris napi;0.801985394724814;  
MH419565;Lepidoptera;Melitaea cinxia;Melitaea cinxia;1;Melitaea cinxia;0.99999999999687;  
MH419567;Lepidoptera;Maniola jurtina;NA;0.146;NA;0.99999999999341;  
MH419568;Lepidoptera;Celastrina argiolus;Celastrina argiolus;1;Celastrina  
argiolus;0.999037794018796;  
MH419569;Lepidoptera;Lampides boeticus;Lampides boeticus;1;Lampides boeticus;0.99999999545906;  
MH419570;Lepidoptera;Vanessa atalanta;Vanessa atalanta;1;Vanessa atalanta;0.99999999757762;  
MH419575;Lepidoptera;Lampides boeticus;Lampides boeticus;1;Lampides boeticus;0.99999999545906;  
MH419576;Lepidoptera;Lycaena phlaeas;Lycaena phlaeas;1;Lycaena phlaeas;0.999999996363186;  
MH419577;Lepidoptera;Lampides boeticus;Lampides boeticus;1;Lampides boeticus;0.99999999411585;  
MH419578;Lepidoptera;Gonepteryx cleopatra;Gonepteryx cleopatra;0.998;Gonepteryx  
cleopatra;0.999118636582266;  
MH419579;Lepidoptera;Argynnis paphia;Argynnis paphia;1;Argynnis paphia;0.999999991389927;  
MH419582;Lepidoptera;Coenonympha corinna;Coenonympha corinna;1;Coenonympha  
corinna;0.99999999567109;  
MH419583;Lepidoptera;Melitaea didyma;Melitaea didyma;1;Melitaea didyma;0.999945824175549;  
MH419584;Lepidoptera;Colias crocea;NA;0.059;NA;0.99999999999738;  
MH419585;Lepidoptera;Charaxes jasius;Charaxes jasius;NA;Charaxes jasius;0.990397821479112;  
MH419587;Lepidoptera;Lasiommata megera;Lasiommata megera;1;Lasiommata megera;0.999379144055441;  
MH419588;Lepidoptera;Vanessa cardui;Vanessa cardui;1;Vanessa cardui;0.999999459983318;  
MH419589;Lepidoptera;Callophrys rubi;NA;0.019;Callophrys rubi;0.998201459637982;  
MH419590;Lepidoptera;Coenonympha corinna;Coenonympha corinna;1;Coenonympha  
corinna;0.999999556334798;  
MH419591;Lepidoptera;Maniola tithonus;Pyronia tithonus;1;Pyronia tithonus;1;  
MH419593;Lepidoptera;Favonius quercus;NA;0.002;Favonius quercus;0.732659082125295;  
MH419594;Lepidoptera;Vanessa cardui;Vanessa cardui;1;Vanessa cardui;0.999997579965112;  
MH419595;Lepidoptera;Coenonympha pamphilus;Coenonympha pamphilus;1;Coenonympha  
pamphilus;0.9999999999964302;  
MH419596;Lepidoptera;Argynnis paphia;Argynnis paphia;1;Argynnis paphia;0.999999991389927;  
MH419597;Lepidoptera;Gonepteryx cleopatra;Gonepteryx cleopatra;0.998;Gonepteryx  
cleopatra;0.999118636582266;  
MH419599;Lepidoptera;Lasiommata megera;Lasiommata megera;1;Lasiommata megera;0.999379144055441;  
MH419601;Lepidoptera;Gonepteryx cleopatra;Gonepteryx cleopatra;0.998;Gonepteryx  
cleopatra;0.999118636582266;  
MH419603;Lepidoptera;Coenonympha pamphilus;Coenonympha pamphilus;1;Coenonympha  
pamphilus;0.999999999999602;  
MH419605;Lepidoptera;Celastrina argiolus;Celastrina argiolus;1;Celastrina  
argiolus;0.999527385150531;  
MH419607;Lepidoptera;Lycaena phlaeas;Lycaena phlaeas;1;Lycaena phlaeas;0.999999996363186;  
MH419608;Lepidoptera;Vanessa atalanta;Vanessa atalanta;1;Vanessa atalanta;0.99999999757762;  
MH419609;Lepidoptera;Celastrina argiolus;Celastrina argiolus;1;Celastrina  
argiolus;0.999631157817044;  
MH419612;Lepidoptera;Lasiommata paramegaera;Lasiommata paramegaera;0.999;Lasiommata  
paramegaera;0.995283446287531;  
MH419613;Lepidoptera;Maniola jurtina;NA;0.038;NA;0.99999999999524;  
MH419614;Lepidoptera;Papilio machaon;Papilio machaon;NA;Papilio machaon;0.998489747694706;  
MH419616;Lepidoptera;Gonepteryx rhamni;Gonepteryx rhamni;0.008;Gonepteryx  
rhamni;0.999527533936108;  
MH419617;Lepidoptera;Lycaena phlaeas;Lycaena phlaeas;1;Lycaena phlaeas;0.999999996363186;  
MH419619;Lepidoptera;Celastrina argiolus;Celastrina argiolus;1;Celastrina  
argiolus;0.999358002620181;  
MH419620;Lepidoptera;Lasiommata megera;Lasiommata megera;1;Lasiommata megera;0.999379144055441;  
MH419621;Lepidoptera;Celastrina argiolus;Celastrina argiolus;1;Celastrina  
argiolus;0.999527385150531;

MH419622;Lepidoptera;Vanessa cardui;Vanessa cardui;1;Vanessa cardui;0.999999803450484;  
MH419625;Lepidoptera;Lycaena phlaeas;Lycaena phlaeas;1;Lycaena phlaeas;0.99999996363186;  
MH419626;Lepidoptera;Coenonympha pamphilus;Coenonympha pamphilus;1;Coenonympha  
pamphilus;0.99999999999744;  
MH419627;Lepidoptera;Aglais ichnusa;NA;NA;Aglais ichnusa;0.712643726050504;  
MH419628;Lepidoptera;Gonepteryx rhamni;NA;0.183;Gonepteryx rhamni;0.991353407168274;  
MH419629;Lepidoptera;Lasiommata megera;Lasiommata megera;1;Lasiommata megera;0.999379144055441;  
MH419634;Lepidoptera;Argynnis paphia;Argynnis paphia;1;Argynnis paphia;0.999999991641772;  
MH419635;Lepidoptera;Glaucopsyche alexis;Glaucopsyche alexis;0.001;Glaucopsyche  
alexis;0.94042380088325;  
MH419636;Lepidoptera;Glaucopsyche alexis;Glaucopsyche alexis;0.001;Glaucopsyche  
alexis;0.94042380088325;  
MH419638;Lepidoptera;Gegenes pumilio;Gegenes pumilio;1;Gegenes pumilio;0.999986726679266;  
MH419641;Lepidoptera;Vanessa atalanta;Vanessa atalanta;1;Vanessa atalanta;0.99999999757762;  
MH419642;Lepidoptera;Maniola cecilia;Pyronia cecilia;NA;Pyronia cecilia;1;  
MH419644;Lepidoptera;Coenonympha corinna;Coenonympha corinna;1;Coenonympha  
corinna;0.99999929826745;  
MH419646;Lepidoptera;Vanessa cardui;Vanessa cardui;1;Vanessa cardui;0.999999850530696;  
MH419651;Lepidoptera;Colias crocea;NA;0.059;NA;0.99999999999738;  
MH419653;Lepidoptera;Lycaena phlaeas;Lycaena phlaeas;1;Lycaena phlaeas;0.999999997206857;  
MH419656;Lepidoptera;Favonius quercus;NA;NA;Favonius quercus;0.73046069582187;  
MH419657;Lepidoptera;Celastrina argiolus;Celastrina argiolus;1;Celastrina  
argiolus;0.999527385150531;  
MH419658;Lepidoptera;Lampides boeticus;Lampides boeticus;1;Lampides boeticus;0.99999999617842;  
MH419659;Lepidoptera;Maniola jurtina;NA;0.038;NA;0.99999999999524;  
MH419660;Lepidoptera;Lasiommata paramegaera;Lasiommata paramegaera;1;Lasiommata  
paramegaera;0.996585757479472;  
MH419662;Lepidoptera;Vanessa cardui;Vanessa cardui;1;Vanessa cardui;0.999999459983318;  
MH419663;Lepidoptera;Lasiommata megera;Lasiommata megera;1;Lasiommata megera;0.999379144055441;  
MH419664;Lepidoptera;Gonepteryx cleopatra;Gonepteryx cleopatra;0.998;Gonepteryx  
cleopatra;0.999118636582266;  
MH419665;Lepidoptera;Papilio machaon;Papilio machaon;NA;Papilio machaon;0.998489747694706;  
MH419666;Lepidoptera;Argynnis paphia;Argynnis paphia;1;Argynnis paphia;0.999999991389927;  
MH419667;Lepidoptera;Maniola cecilia;Pyronia cecilia;NA;Pyronia cecilia;1;  
MH419668;Lepidoptera;Gegenes pumilio;Gegenes pumilio;1;Gegenes pumilio;0.999986726679266;  
MH419669;Lepidoptera;Coenonympha pamphilus;Coenonympha pamphilus;1;Coenonympha  
pamphilus;0.99999999999744;  
MH419670;Lepidoptera;Papilio machaon;Papilio machaon;0.003;Papilio machaon;0.999482752749035;  
MH419671;Lepidoptera;Thymelicus acteon;Thymelicus acteon;1;Thymelicus acteon;0.9999999752248;  
MH419673;Lepidoptera;Melitaea didyma;Melitaea didyma;1;Melitaea didyma;0.999945824175549;  
MH419674;Lepidoptera;Celastrina argiolus;Celastrina argiolus;1;Celastrina  
argiolus;0.999527385150531;  
MH419675;Lepidoptera;Maniola cecilia;Pyronia cecilia;NA;Pyronia cecilia;1;  
MH419677;Lepidoptera;Callophrys rubi;NA;0.001;Callophrys rubi;0.99870518510598;  
MH419678;Lepidoptera;Lampides boeticus;Lampides boeticus;1;Lampides boeticus;0.99999999545906;  
MH419679;Lepidoptera;Coenonympha pamphilus;Coenonympha pamphilus;1;Coenonympha  
pamphilus;0.99999999999744;  
MH419680;Lepidoptera;Lasiommata megera;Lasiommata megera;0.001;Lasiommata  
megera;0.999408473107137;  
MH419682;Lepidoptera;Celastrina argiolus;Celastrina argiolus;1;Celastrina  
argiolus;0.999037794018796;  
MH419683;Lepidoptera;Papilio machaon;Papilio machaon;NA;Papilio machaon;0.998259418780604;  
MH419684;Lepidoptera;Lasiommata paramegaera;Lasiommata paramegaera;0.999;Lasiommata  
paramegaera;0.995283446287531;  
MH419685;Lepidoptera;Lasiommata paramegaera;Lasiommata paramegaera;0.999;Lasiommata  
paramegaera;0.995283446287531;  
MH419687;Lepidoptera;Charaxes jasius;Charaxes jasius;NA;Charaxes jasius;0.990397821479112;  
MH419688;Lepidoptera;Maniola cecilia;Pyronia cecilia;1;Pyronia cecilia;1;  
MH419692;Lepidoptera;Thymelicus acteon;Thymelicus acteon;1;Thymelicus acteon;0.9999999752248;  
MH419693;Lepidoptera;Callophrys rubi;NA;0.001;Callophrys rubi;0.998885705938309;  
MH419695;Lepidoptera;Lasiommata megera;Lasiommata megera;1;Lasiommata megera;0.999379144055441;  
MH419697;Lepidoptera;Aglais urticae;NA;0.115;Aglais urticae;0.987270759857581;  
MH419698;Lepidoptera;Vanessa atalanta;Vanessa atalanta;1;Vanessa atalanta;0.99999999757762;  
MH419699;Lepidoptera;Lycaena phlaeas;Lycaena phlaeas;1;Lycaena phlaeas;0.99999998390052;  
MH419700;Lepidoptera;Callophrys rubi;NA;0.002;Callophrys rubi;0.998790227949348;  
MH419702;Lepidoptera;Vanessa cardui;Vanessa cardui;1;Vanessa cardui;0.999999850530696;  
MH419703;Lepidoptera;Maniola cecilia;Pyronia cecilia;1;Pyronia cecilia;1;  
MH419704;Lepidoptera;Coenonympha pamphilus;Coenonympha pamphilus;1;Coenonympha  
pamphilus;0.99999999999744;  
MH419705;Lepidoptera;Lasiommata megera;Lasiommata megera;1;Lasiommata megera;0.999379144055441;  
MH419706;Lepidoptera;Aricia agestis;NA;0.253;Aricia agestis;0.996350017387504;  
MH419707;Lepidoptera;Coenonympha pamphilus;Coenonympha pamphilus;1;Coenonympha  
pamphilus;0.99999999999744;  
MH419708;Lepidoptera;Carcharodus alceae;Carcharodus alceae;0.001;Carcharodus  
alceae;0.99999994889151;  
MH419710;Lepidoptera;Vanessa cardui;Vanessa cardui;1;Vanessa cardui;0.999999803450484;  
MH419712;Lepidoptera;Callophrys rubi;NA;0.003;Callophrys rubi;0.997091529062725;  
MH419714;Lepidoptera;Maniola cecilia;Pyronia cecilia;1;Pyronia cecilia;1;

MH419715;Lepidoptera;Hipparchia statilinus;Hipparchia statilinus;1;Hipparchia  
statilinus;0.99999999999915;  
MH419716;Lepidoptera;Carcharodus alceae;Carcharodus alceae;1;Carcharodus  
alceae;0.999999998465938;  
MH419718;Lepidoptera;Papilio machaon;Papilio machaon;0.003;Papilio machaon;0.999039382718766;  
MH419720;Lepidoptera;Lasiommata paramegaera;Lasiommata paramegaera;0.999;Lasiommata  
paramegaera;0.979568320704936;  
MH419723;Lepidoptera;Celastrina argiolus;Celastrina argiolus;1;Celastrina  
argiolus;0.999037794018796;  
MH419724;Lepidoptera;Lasiommata paramegaera;Lasiommata paramegaera;0.999;Lasiommata  
paramegaera;0.995283446287531;  
MH419725;Lepidoptera;Gegenes pumilio;Gegenes pumilio;1;Gegenes pumilio;0.999986726679266;  
MH419726;Lepidoptera;Celastrina argiolus;Celastrina argiolus;1;Celastrina  
argiolus;0.999037794018796;  
MH419730;Lepidoptera;Callophrys rubi;NA;0.001;Callophrys rubi;0.998885705938309;  
MH419732;Lepidoptera;Hipparchia statilinus;Hipparchia statilinus;1;Hipparchia  
statilinus;0.99999999999915;  
MH419733;Lepidoptera;Maniola cecilia;Pyronia cecilia;1;Pyronia cecilia;1;  
MH419734;Lepidoptera;Lasiommata paramegaera;Lasiommata paramegaera;0.999;Lasiommata  
paramegaera;0.995283446287531;  
MH419735;Lepidoptera;Coenonympha corinna;Coenonympha corinna;1;Coenonympha  
corinna;0.99999999619604;  
MH419736;Lepidoptera;Vanessa cardui;Vanessa cardui;1;Vanessa cardui;0.999999850530696;  
MH419737;Lepidoptera;Hipparchia aristaeus;Hipparchia aristaeus;1;Hipparchia  
aristaeus;0.999999998656648;  
MH419738;Lepidoptera;Lampides boeticus;Lampides boeticus;1;Lampides boeticus;0.99999999876789;  
MH419740;Lepidoptera;Gonepteryx cleopatra;Gonepteryx cleopatra;1;Gonepteryx  
cleopatra;0.999087339195645;  
MH419741;Lepidoptera;Maniola tithonus;Pyronia tithonus;1;Pyronia tithonus;1;  
MH419743;Lepidoptera;Thymelicus acteon;Thymelicus acteon;1;Thymelicus acteon;0.99999999752248;  
MH419745;Lepidoptera;Gonepteryx cleopatra;Gonepteryx cleopatra;0.998;Gonepteryx  
cleopatra;0.999118636582266;  
MH419749;Lepidoptera;Hipparchia aristaeus;Hipparchia aristaeus;1;Hipparchia  
aristaeus;0.999999993824275;  
MH419750;Lepidoptera;Coenonympha corinna;Coenonympha corinna;1;Coenonympha  
corinna;0.999999999567109;  
MH419752;Lepidoptera;Lycaena phlaeas;Lycaena phlaeas;1;Lycaena phlaeas;0.999999996363186;  
MH419753;Lepidoptera;Lycaena phlaeas;Lycaena phlaeas;1;Lycaena phlaeas;0.999999996363186;  
MH419754;Lepidoptera;Colias crocea;NA;0.059;NA;0.999999999999738;  
MH419755;Lepidoptera;Vanessa atalanta;Vanessa atalanta;1;Vanessa atalanta;0.99999999757762;  
MH419757;Lepidoptera;Vanessa cardui;Vanessa cardui;1;Vanessa cardui;0.999999459983318;  
MH419758;Lepidoptera;Lampides boeticus;Lampides boeticus;1;Lampides boeticus;0.99999999545906;  
MH419759;Lepidoptera;Gonepteryx cleopatra;Gonepteryx cleopatra;0.998;Gonepteryx  
cleopatra;0.999118636582266;  
MH419760;Lepidoptera;Vanessa cardui;Vanessa cardui;1;Vanessa cardui;0.999999803450484;  
MH419761;Lepidoptera;Gegenes pumilio;Gegenes pumilio;1;Gegenes pumilio;0.999986726679266;  
MH419764;Lepidoptera;Lycaena phlaeas;Lycaena phlaeas;1;Lycaena phlaeas;0.999999996363186;  
MH419768;Lepidoptera;Lampides boeticus;Lampides boeticus;1;Lampides boeticus;0.99999999545906;  
MH419772;Lepidoptera;Lycaena phlaeas;Lycaena phlaeas;1;Lycaena phlaeas;0.999999996363186;  
MH419775;Lepidoptera;Anthocharis cardamines;Anthocharis cardamines;1;Anthocharis  
cardamines;0.999999981710346;  
MH419776;Lepidoptera;Celastrina argiolus;Celastrina argiolus;1;Celastrina  
argiolus;0.999527385150531;  
MH419779;Lepidoptera;Gonepteryx cleopatra;Gonepteryx cleopatra;1;Gonepteryx  
cleopatra;0.999110851209713;  
MH419780;Lepidoptera;Colias crocea;NA;0.059;NA;0.999999999999738;  
MH419783;Lepidoptera;Carcharodus alceae;Carcharodus alceae;1;Carcharodus  
alceae;0.999999998465938;  
MH419784;Lepidoptera;Maniola cecilia;Pyronia cecilia;NA;Pyronia cecilia;0.99999999999972;  
MH419785;Lepidoptera;Celastrina argiolus;Celastrina argiolus;1;Celastrina  
argiolus;0.999527385150531;  
MH419787;Lepidoptera;Vanessa cardui;Vanessa cardui;1;Vanessa cardui;0.999999459983318;  
MH419789;Lepidoptera;Lasiommata megera;Lasiommata megera;1;Lasiommata megera;0.998531205767617;  
MH419790;Lepidoptera;Pieris napi;NA;0.011;Pieris napi;0.801985394724814;  
MH419793;Lepidoptera;Colias crocea;NA;0.059;NA;0.999999999999738;  
MH419795;Lepidoptera;Lasiommata megera;Lasiommata megera;1;Lasiommata megera;0.999379144055441;  
MH419796;Lepidoptera;Carcharodus alceae;Carcharodus alceae;1;Carcharodus  
alceae;0.999999990863188;  
MH419797;Lepidoptera;Celastrina argiolus;Celastrina argiolus;1;Celastrina  
argiolus;0.999631157817044;  
MH419798;Lepidoptera;Lampides boeticus;Lampides boeticus;1;Lampides boeticus;0.99999999545906;  
MH419799;Lepidoptera;Vanessa cardui;Vanessa cardui;1;Vanessa cardui;0.999999561362909;  
MH419800;Lepidoptera;Iphiclidides podalirius;NA;0.302;Iphiclidides podalirius;0.931082412606632;  
MH419801;Lepidoptera;Vanessa atalanta;Vanessa atalanta;1;Vanessa atalanta;0.999999996750603;  
MH419802;Lepidoptera;Gonepteryx cleopatra;Gonepteryx cleopatra;0.998;Gonepteryx  
cleopatra;0.999118636582266;  
MH419804;Lepidoptera;Pieris napi;NA;NA;Pieris napi;0.726560864685254;

MH419805;Lepidoptera;Gonepteryx cleopatra;Gonepteryx cleopatra;0.998;Gonepteryx cleopatra;0.999118636582266;  
MH419806;Lepidoptera;Melitaea nevadensis;NA;0.001;Melitaea celadussa;0.727568537860761;  
MH419807;Lepidoptera;Vanessa atalanta;Vanessa atalanta;1;Vanessa atalanta;0.99999999757762;  
MH419808;Lepidoptera;Colias crocea;NA;0.059;NA;0.99999999999738;  
MH419809;Lepidoptera;Vanessa atalanta;Vanessa atalanta;1;Vanessa atalanta;0.99999999757762;  
MH419810;Lepidoptera;Vanessa cardui;Vanessa cardui;1;Vanessa cardui;0.999999459983318;  
MH419811;Lepidoptera;Colias crocea;NA;NA;NA;0.99999999999675;  
MH419812;Lepidoptera;Callophrys rubi;NA;0.001;Callophrys rubi;0.998885705938309;  
MH419814;Lepidoptera;Vanessa cardui;Vanessa cardui;1;Vanessa cardui;0.999999459983318;  
MH419816;Lepidoptera;Lasiommata paramegaera;Lasiommata paramegaera;0.999;Lasiommata paramegaera;0.995283446287531;  
MH419817;Lepidoptera;Lycaena phlaeas;Lycaena phlaeas;1;Lycaena phlaeas;0.999999996363186;  
MH419819;Lepidoptera;Maniola cecilia;Pyronia cecilia;NA;Pyronia cecilia;1;  
MH419820;Lepidoptera;Colias crocea;NA;0.065;NA;0.99999999999745;  
MH419821;Lepidoptera;Iphiclidides podalirius;NA;0.302;Iphiclidides podalirius;0.931082412606632;  
MH419822;Lepidoptera;Anthocharis cardamines;Anthocharis cardamines;1;Anthocharis cardamines;0.99999997953563;  
MH419824;Lepidoptera;Lampides boeticus;Lampides boeticus;1;Lampides boeticus;0.99999999375433;  
MH419826;Lepidoptera;Lycaena phlaeas;Lycaena phlaeas;1;Lycaena phlaeas;0.999999996623245;  
MH419827;Lepidoptera;Coenonympha corinna;Coenonympha corinna;1;Coenonympha corinna;0.99999999567109;  
MH419828;Lepidoptera;Pieris rapae;NA;NA;Pieris rapae;0.999992588119495;  
MH419829;Lepidoptera;Melitaea didyma;Melitaea didyma;1;Melitaea didyma;0.999947466878989;  
MH419831;Lepidoptera;Callophrys rubi;NA;0.019;Callophrys rubi;0.998201459637982;  
MH419832;Lepidoptera;Vanessa atalanta;Vanessa atalanta;1;Vanessa atalanta;0.99999999383476;  
MH419833;Lepidoptera;Gonepteryx cleopatra;Gonepteryx cleopatra;0.998;Gonepteryx cleopatra;0.999118636582266;  
MH419834;Lepidoptera;Lampides boeticus;Lampides boeticus;1;Lampides boeticus;0.99999999688214;  
MH419835;Lepidoptera;Gegenes pumilio;Gegenes pumilio;1;Gegenes pumilio;0.999986726679266;  
MH419836;Lepidoptera;Lycaena phlaeas;Lycaena phlaeas;1;Lycaena phlaeas;0.999999996363186;  
MH419837;Lepidoptera;Callophrys rubi;NA;0.019;Callophrys rubi;0.998201459637982;  
MH419839;Lepidoptera;Pieris rapae;NA;NA;Pieris rapae;0.999984333973504;  
MH419840;Lepidoptera;Lasiommata megera;Lasiommata megera;1;Lasiommata megera;0.999379144055441;  
MH419842;Lepidoptera;Lampides boeticus;Lampides boeticus;1;Lampides boeticus;0.99999999545906;  
MH419843;Lepidoptera;Gonepteryx cleopatra;Gonepteryx cleopatra;0.998;Gonepteryx cleopatra;0.999118636582266;  
MH419845;Lepidoptera;Colias crocea;NA;0.059;NA;0.99999999999738;  
MH419846;Lepidoptera;Melitaea didyma;Melitaea didyma;1;Melitaea didyma;0.99994753434867;  
MH419847;Lepidoptera;Carcharodus alceae;Carcharodus alceae;0.002;Carcharodus alceae;0.999999991169204;  
MH419849;Lepidoptera;Vanessa cardui;Vanessa cardui;1;Vanessa cardui;0.999999841763282;  
MH419850;Lepidoptera;Celastrina argiolus;Celastrina argiolus;1;Celastrina argiolus;0.999527385150531;  
MH419851;Lepidoptera;Lasiommata megera;Lasiommata megera;1;Lasiommata megera;0.999379144055441;  
MH419853;Lepidoptera;Pieris rapae;NA;NA;Pieris rapae;0.999839508485527;  
MH419855;Lepidoptera;Gonepteryx cleopatra;Gonepteryx cleopatra;0.998;Gonepteryx cleopatra;0.999118636582266;  
MH419856;Lepidoptera;Carcharodus alceae;Carcharodus alceae;1;Carcharodus alceae;0.999999998465938;  
MH419857;Lepidoptera;Plebejus idas;NA;0.002;NA;0.999434923024389;  
MH419858;Lepidoptera;Hipparchia aristaeus;Hipparchia aristaeus;1;Hipparchia aristaeus;0.999999993824275;  
MH419859;Lepidoptera;Vanessa atalanta;Vanessa atalanta;1;Vanessa atalanta;0.99999999757762;  
MH419860;Lepidoptera;Papilio machaon;Papilio machaon;NA;Papilio machaon;0.998335940984695;  
MH419861;Lepidoptera;Celastrina argiolus;Celastrina argiolus;1;Celastrina argiolus;0.999527385150531;  
MH419862;Lepidoptera;Coenonympha pamphilus;Coenonympha pamphilus;1;Coenonympha pamphilus;0.99999999999659;  
MH419863;Lepidoptera;Satyrium ilicis;Satyrium ilicis;1;Satyrium ilicis;0.999999987901305;  
MH419865;Lepidoptera;Pieris rapae;NA;NA;Pieris rapae;0.999992588119495;  
MH419866;Lepidoptera;Lasiommata paramegaera;Lasiommata paramegaera;0.999;Lasiommata paramegaera;0.995283446287531;  
MH419867;Lepidoptera;Lycaena phlaeas;Lycaena phlaeas;1;Lycaena phlaeas;0.999999998167567;  
MH419870;Lepidoptera;Colias crocea;NA;0.059;NA;0.99999999999738;  
MH419871;Lepidoptera;Pieris rapae;Pieris rapae;0.002;Pieris rapae;0.999981648403229;  
MH419872;Lepidoptera;Coenonympha pamphilus;Coenonympha pamphilus;1;Coenonympha pamphilus;0.99999999999744;  
MH419873;Lepidoptera;Pieris rapae;NA;0.072;Pieris rapae;0.999944530512174;  
MH419874;Lepidoptera;Lycaena phlaeas;Lycaena phlaeas;1;Lycaena phlaeas;0.999999998508258;  
MH419875;Lepidoptera;Celastrina argiolus;Celastrina argiolus;1;Celastrina argiolus;0.999527385150531;  
MH419876;Lepidoptera;Vanessa cardui;Vanessa cardui;1;Vanessa cardui;0.999999459983318;  
MH419879;Lepidoptera;Lycaena phlaeas;Lycaena phlaeas;1;Lycaena phlaeas;0.999999998167567;  
MH419880;Lepidoptera;Carcharodus alceae;Carcharodus alceae;0.001;Carcharodus alceae;0.999999994870137;  
MH419881;Lepidoptera;Thymelicus acteon;Thymelicus acteon;1;Thymelicus acteon;0.99999999752248;

MH419882;Lepidoptera;Gonepteryx cleopatra;Gonepteryx cleopatra;1;Gonepteryx cleopatra;0.999072420135293;  
MH419884;Lepidoptera;Carcharodus alceae;Carcharodus alceae;0.999;Carcharodus alceae;0.99999996339511;  
MH419885;Lepidoptera;Favonius quercus;NA;NA;Favonius quercus;0.73046069582187;  
MH419886;Lepidoptera;Thymelicus acteon;Thymelicus acteon;1;Thymelicus acteon;0.99999999752248;  
MH419889;Lepidoptera;Melitaea nevadensis;NA;0.001;NA;0.99999999896095;  
MH419891;Lepidoptera;Maniola jurtina;NA;0.062;Maniola jurtina;0.865337727363939;  
MH419892;Lepidoptera;Gonepteryx rhamni;Gonepteryx rhamni;0.012;Gonepteryx rhamni;0.999526173034719;  
MH419893;Lepidoptera;Gonepteryx cleopatra;Gonepteryx cleopatra;0.998;Gonepteryx cleopatra;0.999118636582266;  
MH419894;Lepidoptera;Melitaea didyma;Melitaea didyma;1;Melitaea didyma;0.999945824175549;  
MH419895;Lepidoptera;Iphiclides podalirius;NA;0.302;Iphiclides podalirius;0.931082412606632;  
MH419896;Lepidoptera;Celastrina argiolus;Celastrina argiolus;1;Celastrina argiolus;0.999037794018796;  
MH419898;Lepidoptera;Maniola jurtina;NA;0.038;NA;0.99999999999524;  
MH419899;Lepidoptera;Coenonympha pamphilus;Coenonympha pamphilus;1;Coenonympha pamphilus;0.999999999999488;  
MH419901;Lepidoptera;Polyommatus icarus;Polyommatus icarus;0.001;Polyommatus icarus;0.999847102144222;  
MH419901;Lepidoptera;Polyommatus icarus;Polyommatus icarus;0.001;Polyommatus icarus;0.999847102144222;  
MH419902;Lepidoptera;Satyrium ilicis;Satyrium ilicis;1;Satyrium ilicis;0.999999987901305;  
MH419903;Lepidoptera;Pieris napi;NA;0.011;Pieris napi;0.801985394724814;  
MH419904;Lepidoptera;Lampides boeticus;Lampides boeticus;1;Lampides boeticus;0.99999999545906;  
MH419906;Lepidoptera;Colias crocea;NA;0.059;NA;0.99999999999738;  
MH419908;Lepidoptera;Melitaea nevadensis;NA;0.007;Melitaea celadussa;0.857896833450963;  
MH419911;Lepidoptera;Coenonympha pamphilus;Coenonympha pamphilus;1;Coenonympha pamphilus;0.99999999999744;  
MH419913;Lepidoptera;Thymelicus acteon;Thymelicus acteon;1;Thymelicus acteon;0.99999995239193;  
MH419914;Lepidoptera;Lampides boeticus;Lampides boeticus;1;Lampides boeticus;0.99999999545906;  
MH419915;Lepidoptera;Lycaena phlaeas;Lycaena phlaeas;1;Lycaena phlaeas;0.99999996363186;  
MH419916;Lepidoptera;Maniola cecilia;Pyronia cecilia;1;Pyronia cecilia;0.99999999999972;  
MH419917;Lepidoptera;Colias crocea;NA;0.059;NA;0.99999999999738;  
MH419919;Lepidoptera;Maniola cecilia;Pyronia cecilia;NA;Pyronia cecilia;1;  
MH419920;Lepidoptera;Lasiommata megera;Lasiommata megera;1;Lasiommata megera;0.999806890129977;  
MH419922;Lepidoptera;Polyommatus icarus;Polyommatus icarus;0.001;Polyommatus icarus;0.9997596187835;  
MH419922;Lepidoptera;Polyommatus icarus;Polyommatus icarus;0.001;Polyommatus icarus;0.9997596187835;  
MH419923;Lepidoptera;Pieris rapae;NA;0.175;Pieris rapae;0.99996637543374;  
MH419924;Lepidoptera;Gegenes pumilio;Gegenes pumilio;0.999;Gegenes pumilio;0.999991412663101;  
MH419925;Lepidoptera;Coenonympha corinna;Coenonympha corinna;1;Coenonympha corinna;0.99999999567109;  
MH419926;Lepidoptera;Pieris rapae;NA;NA;Pieris rapae;0.999992588119495;  
MH419927;Lepidoptera;Lasiommata paramegaera;Lasiommata paramegaera;0.999;Lasiommata paramegaera;0.995283446287531;  
MH419928;Lepidoptera;Lycaena phlaeas;Lycaena phlaeas;1;Lycaena phlaeas;0.999999997688235;  
MH419929;Lepidoptera;Hipparchia statilinus;Hipparchia statilinus;1;Hipparchia statilinus;0.99999999999858;  
MH419931;Lepidoptera;Thymelicus acteon;Thymelicus acteon;1;Thymelicus acteon;0.99999999752248;  
MH419933;Lepidoptera;Vanessa cardui;Vanessa cardui;1;Vanessa cardui;0.99999565055428;  
MH419934;Lepidoptera;Coenonympha corinna;Coenonympha corinna;1;Coenonympha corinna;0.99999999481616;  
MH419936;Lepidoptera;Vanessa atalanta;Vanessa atalanta;1;Vanessa atalanta;0.99999999297358;  
MH419937;Lepidoptera;Lasiommata megera;Lasiommata megera;1;Lasiommata megera;0.999379144055441;  
MH419939;Lepidoptera;Melitaea nevadensis;Melitaea celadussa;1;Melitaea celadussa;0.99883216908598;  
MH419941;Lepidoptera;Celastrina argiolus;Celastrina argiolus;1;Celastrina argiolus;0.999037794018796;  
MH419942;Lepidoptera;Pieris rapae;NA;0.175;Pieris rapae;0.99996637543374;  
MH419944;Lepidoptera;Anthocharis cardamines;Anthocharis cardamines;1;Anthocharis cardamines;0.999999917840544;  
MH419945;Lepidoptera;Coenonympha corinna;Coenonympha corinna;1;Coenonympha corinna;0.999999556334798;  
MH419946;Lepidoptera;Maniola jurtina;NA;0.001;Maniola jurtina;0.939220105860875;  
MH419949;Lepidoptera;Aricia agestis;Aricia agestis;1;Aricia agestis;0.979315827401608;  
MH419950;Lepidoptera;Lampides boeticus;Lampides boeticus;1;Lampides boeticus;0.99999999690317;  
MH419953;Lepidoptera;Pieris rapae;NA;0.175;Pieris rapae;0.99996637543374;  
MH419954;Lepidoptera;Iphiclides podalirius;NA;0.313;Iphiclides podalirius;0.889198863100098;  
MH419956;Lepidoptera;Aricia agestis;NA;0.253;Aricia agestis;0.996350017387504;  
MH419958;Lepidoptera;Pieris rapae;Pieris rapae;0.01;Pieris rapae;0.999983538512174;  
MH419962;Lepidoptera;Pieris rapae;NA;NA;Pieris rapae;0.999992588119495;  
MH419964;Lepidoptera;Maniola cecilia;Pyronia cecilia;NA;Pyronia cecilia;1;  
MH419965;Lepidoptera;Lampides boeticus;Lampides boeticus;1;Lampides boeticus;0.99999999545906;  
MH419966;Lepidoptera;Lycaena phlaeas;Lycaena phlaeas;1;Lycaena phlaeas;0.99999992669558;  
MH419971;Lepidoptera;Maniola cecilia;Pyronia cecilia;1;Pyronia cecilia;1;

MH419973;Lepidoptera;Plebejus argyrognomon;NA;0.001;NA;0.994620093546684;  
MH419974;Lepidoptera;Lasiommata paramegaera;Lasiommata paramegaera;0.001;Lasiommata  
paramegaera;0.974943507761532;  
MH419976;Lepidoptera;Iphiclidides podalirius;NA;0.302;Iphiclidides podalirius;0.931082412606632;  
MH419977;Lepidoptera;Gegenes pumilio;Gegenes pumilio;1;Gegenes pumilio;0.999986726679266;  
MH419978;Lepidoptera;Coenonympha pamphilus;Coenonympha pamphilus;1;Coenonympha  
pamphilus;0.99999999999744;  
MH419979;Lepidoptera;Melitaea cinxia;Melitaea cinxia;1;Melitaea cinxia;0.99999999999631;  
MH419980;Lepidoptera;Maniola jurtina;NA;0.018;Maniola jurtina;0.907655467713929;  
MH419982;Lepidoptera;Lasiommata megera;Lasiommata megera;1;Lasiommata megera;0.999379144055441;  
MH419983;Lepidoptera;Coenonympha pamphilus;Coenonympha pamphilus;1;Coenonympha  
pamphilus;0.99999999999744;  
MH419984;Lepidoptera;Lycaena phlaeas;Lycaena phlaeas;1;Lycaena phlaeas;0.999999996363186;  
MH419987;Lepidoptera;Callophrys rubi;NA;0.019;Callophrys rubi;0.998201459637982;  
MH419989;Lepidoptera;Vanessa atalanta;Vanessa atalanta;1;Vanessa atalanta;0.99999999757762;  
MH419991;Lepidoptera;Lasiommata megera;Lasiommata megera;1;Lasiommata megera;0.999379144055441;  
MH419992;Lepidoptera;Gonepteryx cleopatra;Gonepteryx cleopatra;0.998;Gonepteryx  
cleopatra;0.999118636582266;  
MH419993;Lepidoptera;Lasiommata megera;Lasiommata megera;1;Lasiommata megera;0.998777126513664;  
MH419995;Lepidoptera;Vanessa atalanta;Vanessa atalanta;1;Vanessa atalanta;0.99999999757762;  
MH419996;Lepidoptera;Lasiommata megera;Lasiommata megera;1;Lasiommata megera;0.999379144055441;  
MH419997;Lepidoptera;Hipparchia statilinus;Hipparchia statilinus;1;Hipparchia  
statilinus;0.999999999999943;  
MH419998;Lepidoptera;Thymelicus acteon;Thymelicus acteon;1;Thymelicus acteon;0.99999995239193;  
MH420000;Lepidoptera;Glaucopsyche alexis;Glaucopsyche alexis;0.001;Glaucopsyche  
alexis;0.94042380088325;  
MH420001;Lepidoptera;Coenonympha lyllus;Coenonympha pamphilus;1;Coenonympha  
pamphilus;0.99999999983061;  
MH420002;Lepidoptera;Melitaea nevadensis;NA;0.007;Melitaea celadussa;0.856486104428833;  
MH420003;Lepidoptera;Lampides boeticus;Lampides boeticus;1;Lampides boeticus;0.99999998137667;  
MH420004;Lepidoptera;Argynnis paphia;Argynnis paphia;1;Argynnis paphia;0.99999991389927;  
MH420007;Lepidoptera;Gonepteryx cleopatra;Gonepteryx cleopatra;0.998;Gonepteryx  
cleopatra;0.999118636582266;  
MH420008;Lepidoptera;Maniola jurtina;NA;0.001;Maniola jurtina;0.939220105860875;  
MH420009;Lepidoptera;Pieris rapae;NA;NA;Pieris rapae;0.999992588119495;  
MH420010;Lepidoptera;Maniola tithonus;Pyronia tithonus;1;Pyronia tithonus;1;  
MH420011;Lepidoptera;Lasiommata megera;Lasiommata megera;1;Lasiommata megera;0.999379144055441;  
MH420012;Lepidoptera;Hipparchia aristaeus;Hipparchia aristaeus;1;Hipparchia  
aristaeus;0.99999996732214;  
MH420014;Lepidoptera;Carcharodus alceae;Carcharodus alceae;1;Carcharodus  
alceae;0.99999998465938;  
MH420015;Lepidoptera;Lycaena phlaeas;Lycaena phlaeas;1;Lycaena phlaeas;0.99999996363186;  
MH420016;Lepidoptera;Hipparchia aristaeus;Hipparchia aristaeus;1;Hipparchia  
aristaeus;0.99999993824275;  
MH420017;Lepidoptera;Coenonympha pamphilus;Coenonympha pamphilus;1;Coenonympha  
pamphilus;0.99999999999744;  
MH420019;Lepidoptera;Vanessa atalanta;Vanessa atalanta;1;Vanessa atalanta;0.99999999757762;  
MH420020;Lepidoptera;Gonepteryx rhamni;Gonepteryx rhamni;0.018;Gonepteryx  
rhamni;0.997635142289456;  
MH420021;Lepidoptera;Thymelicus acteon;Thymelicus acteon;1;Thymelicus acteon;0.9999999752248;  
MH420022;Lepidoptera;Anthocharis cardamines;Anthocharis cardamines;1;Anthocharis  
cardamines;0.99999997953563;  
MH420023;Lepidoptera;Lampides boeticus;Lampides boeticus;1;Lampides boeticus;0.99999999545906;  
MH420024;Lepidoptera;Lampides boeticus;Lampides boeticus;1;Lampides boeticus;0.9999997693169;  
MH420026;Lepidoptera;Gonepteryx cleopatra;Gonepteryx cleopatra;0.998;Gonepteryx  
cleopatra;0.999118636582266;  
MH420029;Lepidoptera;Charaxes jasius;Charaxes jasius;NA;Charaxes jasius;0.990397821479112;  
MH420030;Lepidoptera;Argynnis paphia;Argynnis paphia;1;Argynnis paphia;0.99999991389927;  
MH420032;Lepidoptera;Argynnis paphia;Argynnis paphia;1;Argynnis paphia;0.99999991389927;  
MH420033;Lepidoptera;Lasiommata megera;Lasiommata megera;1;Lasiommata megera;0.999379144055441;  
MH420034;Lepidoptera;Melitaea didyma;Melitaea didyma;1;Melitaea didyma;0.999887337851026;  
MH420035;Lepidoptera;Celastrina argiolus;Celastrina argiolus;1;Celastrina  
argiolus;0.999037794018796;  
MH420036;Lepidoptera;Gegenes pumilio;Gegenes pumilio;1;Gegenes pumilio;0.999986726679266;  
MH420037;Lepidoptera;Vanessa cardui;Vanessa cardui;1;Vanessa cardui;0.99999459983318;  
MH420041;Lepidoptera;Thymelicus acteon;Thymelicus acteon;1;Thymelicus acteon;0.99999995239193;  
MH420043;Lepidoptera;Carcharodus alceae;Carcharodus alceae;1;Carcharodus  
alceae;0.99999998465938;  
MH420044;Lepidoptera;Melitaea cinxia;Melitaea cinxia;1;Melitaea cinxia;0.99999999999829;  
MH420048;Lepidoptera;Pyrgus armoricanus;Pyrgus armoricanus;1;Pyrgus  
armoricanus;0.999997353848817;  
MH420049;Lepidoptera;Lasiommata paramegaera;Lasiommata paramegaera;0.999;Lasiommata  
paramegaera;0.995283446287531;  
MH420050;Lepidoptera;Argynnis paphia;Argynnis paphia;1;Argynnis paphia;0.99999991389927;  
MH420051;Lepidoptera;Lasiommata megera;Lasiommata megera;0.999;Lasiommata  
megera;0.999423486493351;  
MH420052;Lepidoptera;Papilio machaon;Papilio machaon;0.003;Papilio machaon;0.999482752749035;



MH420053;Lepidoptera;Pyrgus armoricanus;Pyrgus armoricanus;1;Pyrgus armoricanus;0.999997353848817;  
MH420054;Lepidoptera;Gonepteryx cleopatra;Gonepteryx cleopatra;0.998;Gonepteryx cleopatra;0.999118636582266;  
MH420055;Lepidoptera;Lasiommata megera;Lasiommata megera;1;Lasiommata megera;0.999379144055441;  
MH420056;Lepidoptera;Gegenes pumilio;Gegenes pumilio;1;Gegenes pumilio;0.999993089597811;  
MH420057;Lepidoptera;Maniola tithonus;Pyronia tithonus;1;Pyronia tithonus;1;  
MH420058;Lepidoptera;Pyrgus armoricanus;Pyrgus armoricanus;1;Pyrgus armoricanus;0.999997595351167;  
MH420060;Lepidoptera;Colias crocea;NA;0.059;NA;0.99999999999738;  
MH420061;Lepidoptera;Lasiommata megera;Lasiommata megera;0.998;Lasiommata megera;0.998568158791128;  
MH420062;Lepidoptera;Pieris rapae;NA;NA;Pieris rapae;0.999992588119495;  
MH420063;Lepidoptera;Papilio machaon;Papilio machaon;NA;Papilio machaon;0.998335940984695;  
MH420065;Lepidoptera;Carcharodus alceae;Carcharodus alceae;1;Carcharodus alceae;0.99999990863188;  
MH420066;Lepidoptera;Papilio machaon;Papilio machaon;0.003;Papilio machaon;0.999482752749035;  
MH420067;Lepidoptera;Celastrina argiolus;Celastrina argiolus;1;Celastrina argiolus;0.999527385150531;  
MH420069;Lepidoptera;Lycaena phlaeas;Lycaena phlaeas;1;Lycaena phlaeas;0.99999998424926;  
MH420071;Lepidoptera;Lasiommata paramegaera;Lasiommata paramegaera;0.999;Lasiommata paramegaera;0.995283446287531;  
MH420072;Lepidoptera;Lasiommata paramegaera;Lasiommata paramegaera;0.999;Lasiommata paramegaera;0.995283446287531;  
MH420073;Lepidoptera;Lycaena phlaeas;Lycaena phlaeas;1;Lycaena phlaeas;0.99999998167567;  
MH420074;Lepidoptera;Celastrina argiolus;Celastrina argiolus;1;Celastrina argiolus;0.999527385150531;  
MH420075;Lepidoptera;Hipparchia statilinus;Hipparchia statilinus;1;Hipparchia statilinus;0.99999999999801;  
MH420076;Lepidoptera;Lasiommata megera;Lasiommata megera;1;Lasiommata megera;0.999379144055441;  
MH420077;Lepidoptera;Carcharodus alceae;Carcharodus alceae;0.999;Carcharodus alceae;0.99999996339511;  
MH420078;Lepidoptera;Hipparchia neomiris;Hipparchia neomiris;1;Hipparchia neomiris;0.99999999999744;  
MH420079;Lepidoptera;Anthocharis cardamines;Anthocharis cardamines;1;Anthocharis cardamines;0.99999997953563;  
MH420080;Lepidoptera;Coenonympha corinna;Coenonympha corinna;1;Coenonympha corinna;0.99999999270614;  
MH420083;Lepidoptera;Celastrina argiolus;Celastrina argiolus;1;Celastrina argiolus;0.999527385150531;  
MH420084;Lepidoptera;Vanessa cardui;Vanessa cardui;1;Vanessa cardui;0.99999288711561;  
MH420085;Lepidoptera;Lampides boeticus;Lampides boeticus;1;Lampides boeticus;0.99999999545906;  
MH420087;Lepidoptera;Celastrina argiolus;Celastrina argiolus;1;Celastrina argiolus;0.999527385150531;  
MH420091;Lepidoptera;Anthocharis cardamines;Anthocharis cardamines;1;Anthocharis cardamines;0.999999988534341;  
MH420092;Lepidoptera;Anthocharis cardamines;Anthocharis cardamines;1;Anthocharis cardamines;0.999999988534341;  
MH420093;Lepidoptera;Melitaea didyma;Melitaea didyma;1;Melitaea didyma;0.99994753434867;  
MH420095;Lepidoptera;Pieris rapae;NA;NA;Pieris rapae;0.999992588119495;  
MH420096;Lepidoptera;Papilio machaon;Papilio machaon;NA;Papilio machaon;0.99889956649962;  
MH420097;Lepidoptera;Vanessa cardui;Vanessa cardui;1;Vanessa cardui;0.999999565055428;  
MH420099;Lepidoptera;Thymelicus acteon;Thymelicus acteon;1;Thymelicus acteon;0.9999999752248;  
MH420102;Lepidoptera;Glaucopsyche alexis;NA;NA;Glaucopsyche alexis;0.89375645259355;  
MH420104;Lepidoptera;Thymelicus acteon;Thymelicus acteon;1;Thymelicus acteon;0.9999999752248;  
MH420105;Lepidoptera;Hipparchia aristaeus;Hipparchia aristaeus;1;Hipparchia aristaeus;0.99999993824275;  
MH420107;Lepidoptera;Colias crocea;NA;0.059;NA;0.99999999999738;  
MH420111;Lepidoptera;Lampides boeticus;Lampides boeticus;1;Lampides boeticus;0.99999999545906;  
MH420113;Lepidoptera;Lampides boeticus;Lampides boeticus;1;Lampides boeticus;0.99999999545906;  
MH420114;Lepidoptera;Pieris rapae;Pieris rapae;0.02;Pieris rapae;0.999990692934826;  
MH420116;Lepidoptera;Vanessa atalanta;Vanessa atalanta;1;Vanessa atalanta;0.99999999757762;  
MH420117;Lepidoptera;Charaxes jасius;Charaxes jасius;NA;Charaxes jасius;0.990397821479112;  
MH420121;Lepidoptera;Pieris rapae;NA;NA;Pieris rapae;0.999957794752662;  
MH420123;Lepidoptera;Vanessa cardui;Vanessa cardui;1;Vanessa cardui;0.999999459983318;  
MH420124;Lepidoptera;Colias crocea;NA;0.059;NA;0.99999999999738;  
MH420125;Lepidoptera;Aricia agestis;Aricia agestis;0.001;Aricia agestis;0.972120797608056;  
MH420126;Lepidoptera;Colias crocea;NA;0.059;NA;0.99999999999738;  
MH420130;Lepidoptera;Colias crocea;NA;0.059;NA;0.99999999999738;  
MH420131;Lepidoptera;Carcharodus alceae;Carcharodus alceae;1;Carcharodus alceae;0.99999927744201;  
MH420133;Lepidoptera;Vanessa cardui;Vanessa cardui;1;Vanessa cardui;0.999999459983318;  
MH420135;Lepidoptera;Pieris rapae;NA;NA;Pieris rapae;0.999970925323953;  
MH420136;Lepidoptera;Gonepteryx rhamni;Gonepteryx rhamni;0.008;Gonepteryx rhamni;0.999527533936108;  
MH420138;Lepidoptera;Maniola cecilia;Pyronia cecilia;1;Pyronia cecilia;1;  
MH420139;Lepidoptera;Hipparchia aristaeus;Hipparchia aristaeus;1;Hipparchia aristaeus;0.99999993824275;

MH420140;Lepidoptera;Maniola cecilia;Pyronia cecilia;NA;Pyronia cecilia;0.999999999999972;  
MH420141;Lepidoptera;Maniola cecilia;Pyronia cecilia;NA;Pyronia cecilia;1;  
MH420142;Lepidoptera;Colias crocea;NA;NA;Colias crocea;0.742267258907009;  
MH420143;Lepidoptera;Celastrina argiolus;Celastrina argiolus;0.999;Celastrina  
argiolus;0.997181880679251;  
MH420144;Lepidoptera;Callophrys rubi;NA;0.001;Callophrys rubi;0.998885705938309;  
MH420145;Lepidoptera;Maniola cecilia;Pyronia cecilia;1;Pyronia cecilia;1;  
MH420146;Lepidoptera;Vanessa atalanta;Vanessa atalanta;1;Vanessa atalanta;0.999999999757762;  
MH420147;Lepidoptera;Iphiclides podalirius;NA;0.302;Iphiclides podalirius;0.931082412606632;  
MH420148;Lepidoptera;Polyommatus icarus;Polyommatus icarus;0.001;Polyommatus  
icarus;0.999851522482238;  
MH420148;Lepidoptera;Polyommatus icarus;Polyommatus icarus;0.001;Polyommatus  
icarus;0.999851522482238;  
MH420149;Lepidoptera;Glaucopsyche alexis;Glaucopsyche alexis;0.001;Glaucopsyche  
alexis;0.94042380088325;  
MH420151;Lepidoptera;Papilio machaon;Papilio machaon;NA;Papilio machaon;0.99889956649962;  
MH420152;Lepidoptera;Coenonympha pamphilus;Coenonympha pamphilus;1;Coenonympha  
pamphilus;0.999999999999744;  
MH420153;Lepidoptera;Vanessa atalanta;Vanessa atalanta;1;Vanessa atalanta;0.999999999757762;  
MH420156;Lepidoptera;Coenonympha pamphilus;Coenonympha pamphilus;1;Coenonympha  
pamphilus;0.999999999999744;  
MH420158;Lepidoptera;Lycaena phlaeas;Lycaena phlaeas;1;Lycaena phlaeas;0.999999992669558;  
MH420159;Lepidoptera;Papilio machaon;Papilio machaon;0.003;Papilio machaon;0.999039382718766;  
MH420161;Lepidoptera;Aricia agestis;NA;NA;Aricia agestis;0.996930365249266;  
MH420162;Lepidoptera;Lasiommata megera;Lasiommata megera;1;Lasiommata megera;0.999379144055441;  
MH420163;Lepidoptera;Lasiommata megera;Lasiommata megera;1;Lasiommata megera;0.999379144055441;  
MH420164;Lepidoptera;Carcharodus alceae;Carcharodus alceae;0.001;Carcharodus  
alceae;0.999999994870137;  
MH420165;Lepidoptera;Vanessa atalanta;Vanessa atalanta;1;Vanessa atalanta;0.999999999757762;  
MH420166;Lepidoptera;Carcharodus alceae;Carcharodus alceae;0.001;Carcharodus  
alceae;0.999999994870137;  
MH420167;Lepidoptera;Gegenes pumilio;Gegenes pumilio;1;Gegenes pumilio;0.999986726679266;  
MH420168;Lepidoptera;Lasiommata megera;Lasiommata megera;1;Lasiommata megera;0.999379144055441;  
MH420169;Lepidoptera;Pieris rapae;NA;0.206;Pieris rapae;0.999929773639513;  
MH420170;Lepidoptera;Celastrina argiolus;Celastrina argiolus;1;Celastrina  
argiolus;0.999527385150531;  
MH420171;Lepidoptera;Coenonympha pamphilus;Coenonympha pamphilus;1;Coenonympha  
pamphilus;0.999999999999744;  
MH420172;Lepidoptera;Vanessa atalanta;Vanessa atalanta;1;Vanessa atalanta;0.999999999757762;  
MH420173;Lepidoptera;Coenonympha pamphilus;Coenonympha pamphilus;1;Coenonympha  
pamphilus;0.999999999999403;  
MH420174;Lepidoptera;Pieris rapae;NA;NA;Pieris rapae;0.999992588119495;  
MH420175;Lepidoptera;Coenonympha corinna;Coenonympha corinna;1;Coenonympha  
corinna;0.999999556334798;  
MH420176;Lepidoptera;Lampides boeticus;Lampides boeticus;1;Lampides boeticus;0.999999999545906;  
MH420180;Lepidoptera;Carcharodus alceae;Carcharodus alceae;0.999;Carcharodus  
alceae;0.999999996339511;  
MH420181;Lepidoptera;Anthocharis cardamines;Anthocharis cardamines;1;Anthocharis  
cardamines;0.9999997953563;  
MH420182;Lepidoptera;Vanessa atalanta;Vanessa atalanta;1;Vanessa atalanta;0.999999999757762;  
MH420183;Lepidoptera;Argynnis paphia;Argynnis paphia;1;Argynnis paphia;0.99999991389927;  
MH420185;Lepidoptera;Colias crocea;NA;NA;Colias crocea;0.999999999998548;  
MH420189;Lepidoptera;Lasiommata megera;Lasiommata megera;1;Lasiommata megera;0.999379144055441;  
MH420190;Lepidoptera;Lasiommata megera;Lasiommata megera;1;Lasiommata megera;0.999379144055441;  
MH420191;Lepidoptera;Maniola cecilia;Pyronia cecilia;1;Pyronia cecilia;1;  
MH420193;Lepidoptera;Vanessa atalanta;Vanessa atalanta;1;Vanessa atalanta;0.999999999757762;  
MH420194;Lepidoptera;Lasiommata paramegaera;Lasiommata paramegaera;0.999;Lasiommata  
paramegaera;0.995283446287531;  
MH420195;Lepidoptera;Vanessa cardui;Vanessa cardui;1;Vanessa cardui;0.999999803450484;  
MH420196;Lepidoptera;Vanessa cardui;Vanessa cardui;1;Vanessa cardui;0.999999459983318;  
MH420199;Lepidoptera;Gonepteryx cleopatra;Gonepteryx cleopatra;0.998;Gonepteryx  
cleopatra;0.999118636582266;  
MH420200;Lepidoptera;Maniola cecilia;Pyronia cecilia;1;Pyronia cecilia;1;  
MH420201;Lepidoptera;Maniola cecilia;Pyronia cecilia;1;Pyronia cecilia;1;  
MH420203;Lepidoptera;Gonepteryx rhamni;NA;0.474;Gonepteryx rhamni;0.982076396127858;  
MH420204;Lepidoptera;Lasiommata megera;Lasiommata megera;1;Lasiommata megera;0.999313301949205;  
MH420205;Lepidoptera;Pieris rapae;NA;NA;Pieris rapae;0.999993359183004;  
MH420207;Lepidoptera;Gonepteryx rhamni;NA;0.474;Gonepteryx rhamni;0.982076396127858;  
MH420209;Lepidoptera;Celastrina argiolus;Celastrina argiolus;1;Celastrina  
argiolus;0.999037794018796;  
MH420210;Lepidoptera;Pieris rapae;NA;NA;Pieris rapae;0.999992588119495;  
MH420211;Lepidoptera;Coenonympha pamphilus;Coenonympha pamphilus;1;Coenonympha  
pamphilus;0.999999999999744;  
MH420212;Lepidoptera;Maniola cecilia;Pyronia cecilia;NA;Pyronia cecilia;0.999999999999972;  
MH420214;Lepidoptera;Lasiommata paramegaera;Lasiommata paramegaera;0.999;Lasiommata  
paramegaera;0.995283446287531;  
MH420217;Lepidoptera;Vanessa atalanta;Vanessa atalanta;1;Vanessa atalanta;0.999999999757762;  
MH420219;Lepidoptera;Colias crocea;NA;0.059;NA;0.999999999999738;

MH420220;Lepidoptera;Colias crocea;NA;0.059;NA;0.99999999999738;  
MH420221;Lepidoptera;Coenonympha pamphilus;Coenonympha pamphilus;1;Coenonympha  
pamphilus;0.99999999999744;  
MH420223;Lepidoptera;Lycaena phlaeas;Lycaena phlaeas;1;Lycaena phlaeas;0.999999992669558;  
MH420224;Lepidoptera;Lasiommata megera;Lasiommata megera;1;Lasiommata megera;0.999806890129977;  
MH420225;Lepidoptera;Colias crocea;NA;0.059;NA;0.99999999999738;  
MH420226;Lepidoptera;Coenonympha corinna;Coenonympha corinna;1;Coenonympha  
corinna;0.999999556334798;  
MH420229;Lepidoptera;Papilio machaon;Papilio machaon;0.001;Papilio machaon;0.999463129150422;  
MH420231;Lepidoptera;Pieris rapae;NA;NA;Pieris rapae;0.99992588119495;  
MH420232;Lepidoptera;Lycaena phlaeas;Lycaena phlaeas;1;Lycaena phlaeas;0.99999998167567;  
MH420233;Lepidoptera;Lampides boeticus;Lampides boeticus;1;Lampides boeticus;0.9999999876789;  
MH420234;Lepidoptera;Gonepteryx cleopatra;Gonepteryx cleopatra;0.998;Gonepteryx  
cleopatra;0.999118636582266;  
MH420236;Lepidoptera;Callophrys rubi;NA;0.001;Callophrys rubi;0.99885705938309;  
MH420240;Lepidoptera;Vanessa cardui;Vanessa cardui;1;Vanessa cardui;0.99999850530696;  
MH420241;Lepidoptera;Charaxes jасius;Charaxes jасius;NA;Charaxes jасius;0.990397821479112;  
MH420242;Lepidoptera;Polyommatus icarus;Polyommatus icarus;0.001;Polyommatus  
icarus;0.999851522482238;  
MH420242;Lepidoptera;Polyommatus icarus;Polyommatus icarus;0.001;Polyommatus  
icarus;0.999851522482238;  
MH420243;Lepidoptera;Papilio machaon;Papilio machaon;0.003;Papilio machaon;0.999482752749035;  
MH420246;Lepidoptera;Maniola cecilia;Pyronia cecilia;NA;Pyronia cecilia;0.99999999999972;  
MH420248;Lepidoptera;Maniola jurtina;NA;0.038;NA;0.99999999999524;  
MH420250;Lepidoptera;Lampides boeticus;Lampides boeticus;1;Lampides boeticus;0.99999999545906;  
MH420251;Lepidoptera;Coenonympha corinna;Coenonympha corinna;1;Coenonympha  
corinna;0.99999999567109;  
MH420252;Lepidoptera;Gonepteryx cleopatra;Gonepteryx cleopatra;0.998;Gonepteryx  
cleopatra;0.999118636582266;  
MH420253;Lepidoptera;Maniola cecilia;Pyronia cecilia;NA;Pyronia cecilia;1;  
MH420254;Lepidoptera;Vanessa cardui;Vanessa cardui;1;Vanessa cardui;0.99999459983318;  
MH420255;Lepidoptera;Gonepteryx rhamni;NA;0.474;Gonepteryx rhamni;0.982076396127858;  
MH420256;Lepidoptera;Vanessa atalanta;Vanessa atalanta;1;Vanessa atalanta;0.99999999647542;  
MH420258;Lepidoptera;Aglais urticae;NA;0.002;Aglais urticae;0.987497593219019;  
MH420259;Lepidoptera;Maniola cecilia;Pyronia cecilia;1;Pyronia cecilia;1;  
MH420260;Lepidoptera;Anthocharis cardamines;Anthocharis cardamines;1;Anthocharis  
cardamines;0.9999997953563;  
MH420261;Lepidoptera;Pieris napi;NA;0.011;Pieris napi;0.801985394724814;  
MH420262;Lepidoptera;Maniola cecilia;Pyronia cecilia;NA;Pyronia cecilia;1;  
MH420263;Lepidoptera;Colias crocea;NA;0.059;NA;0.99999999999738;  
MH420266;Lepidoptera;Pieris rapae;NA;0.087;Pieris rapae;0.999955370233307;  
MH420267;Lepidoptera;Vanessa cardui;Vanessa cardui;1;Vanessa cardui;0.999991578978624;  
MH420268;Lepidoptera;Maniola cecilia;Pyronia cecilia;1;Pyronia cecilia;1;  
MH420269;Lepidoptera;Lasiommata megera;Lasiommata megera;1;Lasiommata megera;0.999379144055441;  
MH420271;Lepidoptera;Vanessa cardui;Vanessa cardui;1;Vanessa cardui;0.99999850530696;  
MH420273;Lepidoptera;Lasiommata megera;Lasiommata megera;1;Lasiommata megera;0.999379144055441;  
MH420274;Lepidoptera;Pieris rapae;NA;NA;Pieris rapae;0.99992588119495;  
MH420275;Lepidoptera;Celastrina argiolus;Celastrina argiolus;1;Celastrina  
argiolus;0.999527385150531;  
MH420276;Lepidoptera;Pyrgus armoricanus;Pyrgus armoricanus;1;Pyrgus  
armoricanus;0.999997353848817;  
MH420277;Lepidoptera;Coenonympha pamphilus;Coenonympha pamphilus;1;Coenonympha  
pamphilus;0.99999999999744;  
MH420280;Lepidoptera;Gonepteryx rhamni;NA;0.174;Gonepteryx rhamni;0.988654195211968;  
MH420282;Lepidoptera;Celastrina argiolus;Celastrina argiolus;1;Celastrina  
argiolus;0.999527385150531;  
MH420284;Lepidoptera;Lampides boeticus;Lampides boeticus;1;Lampides boeticus;0.99999999545906;  
MH420285;Lepidoptera;Vanessa cardui;Vanessa cardui;1;Vanessa cardui;0.99999850530696;  
MH420286;Lepidoptera;Pieris rapae;NA;NA;Pieris rapae;0.99992588119495;  
MH420287;Lepidoptera;Coenonympha corinna;Coenonympha corinna;1;Coenonympha  
corinna;0.999999556334798;  
MH420288;Lepidoptera;Pieris napi;NA;0.011;Pieris napi;0.801985394724814;  
MH420289;Lepidoptera;Hipparchia aristaeus;Hipparchia aristaeus;1;Hipparchia  
aristaeus;0.99999993824275;  
MH420290;Lepidoptera;Lycaena phlaeas;Lycaena phlaeas;1;Lycaena phlaeas;0.99999996363186;  
MH420292;Lepidoptera;Pyrgus armoricanus;Pyrgus armoricanus;1;Pyrgus  
armoricanus;0.999997353848817;  
MH420293;Lepidoptera;Carcharodus alceae;Carcharodus alceae;1;Carcharodus  
alceae;0.99999998465938;  
MH420294;Lepidoptera;Lasiommata megera;Lasiommata megera;1;Lasiommata megera;0.999379144055441;  
MH420295;Lepidoptera;Vanessa atalanta;Vanessa atalanta;1;Vanessa atalanta;0.99999999757762;  
MH420296;Lepidoptera;Carcharodus alceae;Carcharodus alceae;1;Carcharodus  
alceae;0.99999998465938;  
MH420297;Lepidoptera;Charaxes jасius;Charaxes jасius;NA;Charaxes jасius;0.990397821479112;  
MH420298;Lepidoptera;Vanessa atalanta;Vanessa atalanta;1;Vanessa atalanta;0.99999999757762;  
MH420300;Lepidoptera;Colias crocea;NA;0.059;NA;0.99999999999738;  
MH420301;Lepidoptera;Celastrina argiolus;Celastrina argiolus;0.999;Celastrina  
argiolus;0.999536508848955;

MH420307;Lepidoptera;Lampides boeticus;Lampides boeticus;1;Lampides boeticus;0.999999999620769;  
MH420308;Lepidoptera;Lasiommata paramegaera;Lasiommata paramegaera;0.999;Lasiommata  
paramegaera;0.995283446287531;  
MH420309;Lepidoptera;Coenonympha corinna;Coenonympha corinna;1;Coenonympha  
corinna;0.999999866312132;  
MH420310;Lepidoptera;Carcharodus alceae;Carcharodus alceae;0.999;Carcharodus  
alceae;0.99999998008462;  
MH420311;Lepidoptera;Papilio machaon;Papilio machaon;0.001;Papilio machaon;0.999463129150422;  
MH420312;Lepidoptera;Celastrina argiolus;Celastrina argiolus;1;Celastrina  
argiolus;0.999527385150531;  
MH420313;Lepidoptera;Pieris napi;NA;0.028;Pieris napi;0.888205720664699;  
MH420314;Lepidoptera;Pieris rapae;NA;NA;Pieris rapae;0.999970925323953;  
MH420315;Lepidoptera;Lycaena phlaeas;Lycaena phlaeas;1;Lycaena phlaeas;0.999999998167567;  
MH420316;Lepidoptera;Lasiommata megera;Lasiommata megera;1;Lasiommata megera;0.999379144055441;  
MH420320;Lepidoptera;Aricia agestis;Aricia agestis;0.001;Aricia agestis;0.972120797608056;  
MH420321;Lepidoptera;Celastrina argiolus;Celastrina argiolus;1;Celastrina  
argiolus;0.999437501405169;  
MH420324;Lepidoptera;Celastrina argiolus;Celastrina argiolus;1;Celastrina  
argiolus;0.999527385150531;  
MH420325;Lepidoptera;Aricia agestis;NA;0.067;Aricia agestis;0.999509743227786;  
MH420326;Lepidoptera;Lycaena phlaeas;Lycaena phlaeas;1;Lycaena phlaeas;0.999999998167567;  
MH420327;Lepidoptera;Vanessa cardui;Vanessa cardui;1;Vanessa cardui;0.999999459983318;  
MH420328;Lepidoptera;Carcharodus alceae;Carcharodus alceae;0.999;Carcharodus  
alceae;0.99999998008462;  
MH420329;Lepidoptera;Hipparchia neomiris;Hipparchia neomiris;1;Hipparchia  
neomiris;0.99999999999801;  
MH420330;Lepidoptera;Pieris rapae;Pieris rapae;NA;Pieris rapae;0.999994302747155;  
MH420332;Lepidoptera;Colias crocea;NA;0.059;NA;0.99999999999738;  
MH420333;Lepidoptera;Callophrys rubi;NA;0.001;Callophrys rubi;0.998885705938309;  
MH420334;Lepidoptera;Satyrium ilicis;Satyrium ilicis;1;Satyrium ilicis;0.999999984618455;  
MH420335;Lepidoptera;Lasiommata megera;Lasiommata megera;1;Lasiommata megera;0.999379144055441;  
MH420336;Lepidoptera;Lampides boeticus;Lampides boeticus;1;Lampides boeticus;0.99999999545906;  
MH420337;Lepidoptera;Celastrina argiolus;Celastrina argiolus;1;Celastrina  
argiolus;0.999037794018796;  
MH420339;Lepidoptera;Gonepteryx rhamni;NA;0.474;Gonepteryx rhamni;0.982076396127858;  
MH420340;Lepidoptera;Colias crocea;NA;0.059;NA;0.99999999999738;  
MH420341;Lepidoptera;Anthocharis cardamines;Anthocharis cardamines;1;Anthocharis  
cardamines;0.99999997953563;  
MH420342;Lepidoptera;Lycaena phlaeas;Lycaena phlaeas;1;Lycaena phlaeas;0.999999994647311;  
MH420343;Lepidoptera;Coenonympha pamphilus;Coenonympha pamphilus;1;Coenonympha  
pamphilus;0.99999999999744;  
MH420344;Lepidoptera;Coenonympha corinna;Coenonympha corinna;1;Coenonympha  
corinna;0.999999999567109;  
MH420345;Lepidoptera;Lycaena phlaeas;Lycaena phlaeas;1;Lycaena phlaeas;0.999999998167567;  
MH420347;Lepidoptera;Celastrina argiolus;Celastrina argiolus;1;Celastrina  
argiolus;0.999037794018796;  
MH420348;Lepidoptera;Maniola cecilia;Pyronia cecilia;NA;Pyronia cecilia;1;  
MH420350;Lepidoptera;Pieris rapae;Pieris rapae;1;Pieris rapae;0.999994248088769;  
MH420351;Lepidoptera;Carcharodus alceae;Carcharodus alceae;0.999;Carcharodus  
alceae;0.99999998008462;  
MH420352;Lepidoptera;Pieris rapae;NA;NA;Pieris rapae;0.999992588119495;  
MH420353;Lepidoptera;Maniola jurtina;NA;0.001;Maniola jurtina;0.939220105860875;  
MH420354;Lepidoptera;Gegenes pumilio;Gegenes pumilio;1;Gegenes pumilio;0.999986726679266;  
MH420356;Lepidoptera;Coenonympha pamphilus;Coenonympha pamphilus;1;Coenonympha  
pamphilus;0.99999999999488;  
MH420357;Lepidoptera;Aricia agestis;NA;NA;Aricia agestis;0.999677837947498;  
MH420358;Lepidoptera;Gonepteryx cleopatra;Gonepteryx cleopatra;0.001;Gonepteryx  
cleopatra;0.999115549984292;  
MH420360;Lepidoptera;Aglais urticae;Aglais urticae;0.001;Aglais urticae;0.990690600684087;  
MH420361;Lepidoptera;Argynnis paphia;Argynnis paphia;1;Argynnis paphia;0.99999991389927;  
MH420362;Lepidoptera;Maniola cecilia;Pyronia cecilia;1;Pyronia cecilia;1;  
MH420365;Lepidoptera;Anthocharis cardamines;Anthocharis cardamines;1;Anthocharis  
cardamines;0.99999997953563;  
MH420366;Lepidoptera;Lycaena phlaeas;Lycaena phlaeas;1;Lycaena phlaeas;0.999999996363186;  
MH420367;Lepidoptera;Coenonympha pamphilus;Coenonympha pamphilus;1;Coenonympha  
pamphilus;0.99999999999744;  
MH420368;Lepidoptera;Pieris napi;NA;0.011;Pieris napi;0.801985394724814;  
MH420369;Lepidoptera;Celastrina argiolus;Celastrina argiolus;1;Celastrina  
argiolus;0.999527385150531;  
MH420370;Lepidoptera;Issoria lathonia;Issoria lathonia;1;Issoria lathonia;0.99999999989257;  
MH420371;Lepidoptera;Callophrys rubi;NA;0.001;Callophrys rubi;0.998885705938309;  
MH420373;Lepidoptera;Gonepteryx rhamni;Gonepteryx rhamni;1;Gonepteryx rhamni;0.999673119534565;  
MH420376;Lepidoptera;Maniola tithonus;Pyronia tithonus;1;Pyronia tithonus;1;  
MH420378;Lepidoptera;Colias crocea;NA;0.059;NA;0.99999999999738;  
MH420379;Lepidoptera;Carcharodus alceae;Carcharodus alceae;1;Carcharodus  
alceae;0.999999995267814;  
MH420380;Lepidoptera;Maniola cecilia;Pyronia cecilia;1;Pyronia cecilia;1;  
MH420381;Lepidoptera;Maniola jurtina;NA;0.195;Maniola jurtina;0.942918068360979;

MH420382;Lepidoptera;Maniola cecilia;Pyronia cecilia;1;Pyronia cecilia;1;  
MH420388;Lepidoptera;Lasiommata megera;Lasiommata megera;1;Lasiommata megera;0.999379144055441;  
MH420391;Lepidoptera;Pieris rapae;NA;0.175;Pieris rapae;0.99996637543374;  
MH420392;Lepidoptera;Lampides boeticus;Lampides boeticus;1;Lampides boeticus;0.99999999545906;  
MH420393;Lepidoptera;Maniola cecilia;Pyronia cecilia;1;Pyronia cecilia;1;  
MH420394;Lepidoptera;Pyrgus armoricanus;Pyrgus armoricanus;1;Pyrgus armoricanus;0.999997353848817;  
MH420398;Lepidoptera;Glaucopsyche alexis;NA;NA;Glaucopsyche alexis;0.979381169624069;  
MH420399;Lepidoptera;Vanessa cardui;Vanessa cardui;1;Vanessa cardui;0.999999459983318;  
MH420400;Lepidoptera;Celastrina argiolus;Celastrina argiolus;1;Celastrina argiolus;0.999037794018796;  
MH420403;Lepidoptera;Thymelicus acteon;Thymelicus acteon;1;Thymelicus acteon;0.999999995239193;  
MH420405;Lepidoptera;Coenonympha pamphilus;Coenonympha pamphilus;1;Coenonympha pamphilus;0.99999999999744;  
MH420406;Lepidoptera;Lasiommata megera;Lasiommata megera;1;Lasiommata megera;0.998531205767617;  
MH420407;Lepidoptera;Polyommatus icarus;Polyommatus icarus;0.001;Polyommatus icarus;0.999851522482238;  
MH420407;Lepidoptera;Polyommatus icarus;Polyommatus icarus;0.001;Polyommatus icarus;0.999851522482238;  
MH420409;Lepidoptera;Lasiommata megera;Lasiommata megera;1;Lasiommata megera;0.999928528239676;  
MH420411;Lepidoptera;Coenonympha pamphilus;Coenonympha pamphilus;1;Coenonympha pamphilus;0.99999999983061;  
MH420412;Lepidoptera;Vanessa cardui;Vanessa cardui;1;Vanessa cardui;0.999999459983318;  
MH420413;Lepidoptera;Charaxes jasius;Charaxes jasius;NA;Charaxes jasius;0.990397821479112;  
MH420415;Lepidoptera;Colias crocea;NA;0.059;NA;0.99999999999738;  
MH420416;Lepidoptera;Lasiommata megera;Lasiommata megera;1;Lasiommata megera;0.999379144055441;  
MH420417;Lepidoptera;Vanessa cardui;Vanessa cardui;1;Vanessa cardui;0.999999459983318;  
MH420418;Lepidoptera;Vanessa atalanta;Vanessa atalanta;1;Vanessa atalanta;0.999999999130267;  
MH670083;Lepidoptera;Erebia manto;NA;0.061;Erebia bubastis;0.999952281744477;  
MH670084;Lepidoptera;Erebia manto;NA;0.031;Erebia bubastis;0.99994721927445;  
MH670085;Lepidoptera;Erebia manto;NA;0.061;Erebia bubastis;0.999962951682882;  
MH670086;Lepidoptera;Erebia manto;NA;0.073;Erebia bubastis;0.999956603717016;  
MH670087;Lepidoptera;Erebia manto;NA;0.174;Erebia bubastis;0.999970399901456;  
MH670088;Lepidoptera;Erebia manto;NA;0.174;Erebia bubastis;0.999970399901456;  
MH670089;Lepidoptera;Erebia manto;Erebia manto;NA;Erebia bubastis;0.999886022205242;  
MH670090;Lepidoptera;Erebia manto;Erebia manto;0.999;Erebia bubastis;0.999660353922442;  
MH670091;Lepidoptera;Erebia manto;NA;0.187;Erebia bubastis;0.999973083726829;  
MH670092;Lepidoptera;Erebia manto;NA;0.067;Erebia bubastis;0.99997153066746;  
MH670097;Lepidoptera;Erebia manto;NA;0.009;Erebia bubastis;0.999981998688491;  
MH670098;Lepidoptera;Erebia manto;NA;0.187;Erebia bubastis;0.999973083726829;  
MH670099;Lepidoptera;Erebia manto;NA;0.009;Erebia bubastis;0.999982898283498;  
MH670100;Lepidoptera;Erebia eriphyle;Erebia eriphyle;1;NA;0.795999353777463;  
MH670101;Lepidoptera;Erebia manto;NA;0.009;Erebia bubastis;0.999982898283498;  
MH670102;Lepidoptera;Erebia manto;NA;0.009;Erebia bubastis;0.999982898283498;  
MH670103;Lepidoptera;Erebia manto;NA;0.187;Erebia bubastis;0.999973083726829;  
MH670106;Lepidoptera;Erebia manto;NA;0.187;Erebia bubastis;0.999972982836091;  
MH670108;Lepidoptera;Erebia manto;NA;0.181;Erebia bubastis;0.999943713439002;  
MH670109;Lepidoptera;Erebia manto;NA;0.187;Erebia bubastis;0.999973083726829;  
MH670110;Lepidoptera;Erebia manto;NA;0.067;Erebia bubastis;0.999969987709769;  
MH670116;Lepidoptera;Erebia christi;Erebia christi;1;Erebia christi;0.997897965375107;  
MH670121;Lepidoptera;Erebia manto;Erebia manto;NA;Erebia bubastis;0.999886022205242;  
MH670122;Lepidoptera;Erebia manto;NA;0.187;Erebia bubastis;0.999973083726829;  
MH670123;Lepidoptera;Erebia manto;NA;0.181;Erebia bubastis;0.999943713439002;  
MH670124;Lepidoptera;Erebia manto;NA;0.067;Erebia bubastis;0.999969987709769;  
MH670126;Lepidoptera;Erebia manto;Erebia manto;NA;Erebia bubastis;0.999886022205242;  
MH670127;Lepidoptera;Erebia manto;Erebia manto;NA;Erebia bubastis;0.999866474678959;  
MH670128;Lepidoptera;Erebia manto;NA;0.009;Erebia bubastis;0.999982898283498;  
MH670129;Lepidoptera;Erebia manto;NA;0.009;Erebia bubastis;0.999981998688491;  
MH670130;Lepidoptera;Erebia manto;NA;0.174;Erebia bubastis;0.999970399901456;  
MH670131;Lepidoptera;Erebia manto;NA;0.031;Erebia bubastis;0.99994721927445;  
MH670132;Lepidoptera;Erebia manto;NA;0.119;Erebia bubastis;0.980474940339695;  
MH670133;Lepidoptera;Erebia manto;NA;0.067;Erebia bubastis;0.99997153066746;  
MH670134;Lepidoptera;Erebia manto;NA;0.174;Erebia bubastis;0.999970399901456;  
MH670135;Lepidoptera;Erebia manto;NA;0.174;Erebia bubastis;0.999970399901456;  
MH670136;Lepidoptera;Erebia manto;NA;0.174;Erebia bubastis;0.999970399901456;  
MH670138;Lepidoptera;Erebia manto;NA;0.187;Erebia bubastis;0.999973083726829;  
MH670139;Lepidoptera;Erebia manto;NA;0.067;Erebia bubastis;0.999969987709769;  
MH670140;Lepidoptera;Erebia manto;NA;0.067;Erebia bubastis;0.999969987709769;  
MH670141;Lepidoptera;Erebia manto;NA;0.031;Erebia bubastis;0.99994721927445;  
MH670142;Lepidoptera;Erebia manto;NA;0.187;Erebia bubastis;0.999972982836091;  
MH670143;Lepidoptera;Erebia manto;NA;0.031;Erebia bubastis;0.99994721927445;  
MH670144;Lepidoptera;Erebia christi;Erebia christi;1;Erebia christi;0.997897965375107;  
MH670145;Lepidoptera;Erebia manto;NA;0.009;Erebia bubastis;0.999981998688491;  
MH670146;Lepidoptera;Erebia manto;NA;NA;Erebia manto;0.998390110509447;  
MH670147;Lepidoptera;Erebia manto;NA;0.187;Erebia bubastis;0.999973083726829;  
MH670148;Lepidoptera;Erebia eriphyle;Erebia eriphyle;1;NA;0.795999353777463;  
MH670149;Lepidoptera;Erebia manto;NA;0.174;Erebia bubastis;0.999970399901456;  
MH670150;Lepidoptera;Erebia manto;NA;0.187;Erebia bubastis;0.999973083726829;

MH670151;Lepidoptera;Erebia manto;NA;NA;Erebia manto;0.994206031771192;  
MH670152;Lepidoptera;Erebia manto;NA;0.187;Erebia bubastis;0.999972982836091;  
MH670153;Lepidoptera;Erebia manto;NA;0.181;Erebia bubastis;0.999943713439002;  
MH670154;Lepidoptera;Erebia manto;NA;0.009;Erebia bubastis;0.999981998688491;  
MH670155;Lepidoptera;Erebia manto;NA;0.067;Erebia bubastis;0.999969987709769;  
MH670156;Lepidoptera;Erebia manto;NA;0.187;Erebia bubastis;0.999973083726829;  
MH670157;Lepidoptera;Erebia manto;NA;0.187;Erebia bubastis;0.999973083726829;  
MH670158;Lepidoptera;Erebia manto;NA;0.174;Erebia bubastis;0.999970399901456;  
MH670159;Lepidoptera;Erebia manto;Erebia manto;NA;Erebia bubastis;0.999886022205242;  
MH670160;Lepidoptera;Erebia manto;NA;NA;Erebia manto;0.994206031771192;  
MH670161;Lepidoptera;Erebia manto;NA;0.073;Erebia bubastis;0.999956603717016;  
MH670162;Lepidoptera;Erebia manto;Erebia manto;NA;Erebia bubastis;0.999886022205242;  
MH670163;Lepidoptera;Erebia manto;NA;0.073;Erebia bubastis;0.999956603717016;  
MH670164;Lepidoptera;Erebia manto;NA;0.187;Erebia bubastis;0.999972982836091;  
MH670165;Lepidoptera;Erebia eriphyle;Erebia eriphyle;1;NA;0.795999353777463;  
MH670166;Lepidoptera;Erebia manto;NA;0.181;Erebia bubastis;0.999943713439002;  
MH670167;Lepidoptera;Erebia manto;NA;NA;Erebia bubastis;0.999967994349337;  
MH670168;Lepidoptera;Erebia manto;Erebia manto;NA;Erebia bubastis;0.999886022205242;  
MH670169;Lepidoptera;Erebia manto;NA;0.187;Erebia bubastis;0.999973083726829;  
MH670170;Lepidoptera;Erebia manto;NA;0.187;Erebia bubastis;0.999973083726829;  
MH670171;Lepidoptera;Erebia manto;NA;0.009;Erebia bubastis;0.999981998688491;  
MH670172;Lepidoptera;Erebia manto;NA;0.174;Erebia bubastis;0.999969474482721;  
MH670173;Lepidoptera;Erebia manto;Erebia manto;NA;Erebia bubastis;0.999886022205242;  
MH670174;Lepidoptera;Erebia manto;NA;0.009;Erebia bubastis;0.999982898283498;  
MH670175;Lepidoptera;Erebia manto;NA;0.073;Erebia bubastis;0.999956603717016;  
MH670176;Lepidoptera;Erebia manto;NA;0.009;Erebia bubastis;0.999981998688491;  
MH670177;Lepidoptera;Erebia manto;NA;0.187;Erebia bubastis;0.999973083726829;  
MH670178;Lepidoptera;Erebia manto;NA;0.174;Erebia bubastis;0.999969474482721;  
MH670179;Lepidoptera;Erebia manto;NA;0.174;Erebia bubastis;0.99996840517015;  
MH670180;Lepidoptera;Erebia manto;NA;0.187;Erebia bubastis;0.999973083726829;  
MH670181;Lepidoptera;Erebia manto;NA;0.174;Erebia bubastis;0.999970399901456;  
MH670182;Lepidoptera;Erebia manto;NA;0.054;Erebia bubastis;0.999957130162365;  
MH670183;Lepidoptera;Erebia manto;NA;0.009;Erebia bubastis;0.999982898283498;  
MH670184;Lepidoptera;Erebia manto;NA;0.009;Erebia bubastis;0.999982898283498;  
MH670185;Lepidoptera;Erebia manto;NA;0.067;Erebia bubastis;0.999971289249363;  
MH670186;Lepidoptera;Erebia manto;NA;NA;Erebia manto;0.998390110509447;  
MH670187;Lepidoptera;Erebia manto;NA;NA;Erebia manto;0.998390110509447;  
MH670188;Lepidoptera;Erebia manto;NA;0.174;Erebia bubastis;0.999968521048825;  
MH670189;Lepidoptera;Erebia manto;NA;0.174;Erebia bubastis;0.999970399901456;  
MH670190;Lepidoptera;Erebia manto;NA;NA;Erebia manto;0.994206031771192;  
MH670191;Lepidoptera;Erebia manto;NA;0.187;Erebia bubastis;0.999972982836091;  
MH670192;Lepidoptera;Erebia manto;NA;0.174;Erebia bubastis;0.999968521048825;  
MH670193;Lepidoptera;Erebia manto;NA;0.187;Erebia bubastis;0.999972982836091;  
MH670194;Lepidoptera;Erebia manto;NA;0.116;Erebia manto;0.987009895446114;  
MH670195;Lepidoptera;Erebia manto;NA;0.073;Erebia bubastis;0.999956603717016;  
MH670196;Lepidoptera;Erebia manto;NA;0.174;Erebia bubastis;0.999970399901456;  
MH670197;Lepidoptera;Erebia manto;Erebia manto;NA;Erebia bubastis;0.999886022205242;  
MH670198;Lepidoptera;Erebia manto;NA;NA;Erebia manto;0.994206031771192;  
MH670199;Lepidoptera;Erebia manto;Erebia manto;NA;Erebia bubastis;0.999886022205242;  
MH670200;Lepidoptera;Erebia manto;NA;0.187;Erebia bubastis;0.999973076462209;  
MH670201;Lepidoptera;Erebia manto;NA;0.181;Erebia bubastis;0.999943713439002;  
MH670202;Lepidoptera;Erebia manto;Erebia manto;0.001;Erebia bubastis;0.999825906151859;  
MH670203;Lepidoptera;Erebia manto;NA;0.187;Erebia bubastis;0.999972982836091;  
MH670204;Lepidoptera;Erebia manto;NA;0.009;Erebia bubastis;0.999981998688491;  
MH670205;Lepidoptera;Erebia manto;NA;0.067;Erebia bubastis;0.999969987709769;  
MH670206;Lepidoptera;Erebia manto;NA;0.174;Erebia bubastis;0.99996840517015;  
MH670207;Lepidoptera;Erebia manto;NA;0.009;Erebia bubastis;0.999982898283498;  
MH670208;Lepidoptera;Erebia manto;NA;0.009;Erebia bubastis;0.999981998688491;  
MH670209;Lepidoptera;Erebia manto;NA;0.067;Erebia bubastis;0.999969987709769;  
MH670210;Lepidoptera;Erebia manto;NA;0.116;Erebia manto;0.987009895446114;  
MH670211;Lepidoptera;Erebia manto;NA;0.161;Erebia bubastis;0.986242916492014;  
MH670212;Lepidoptera;Erebia manto;NA;0.187;Erebia bubastis;0.999973083726829;  
MH670213;Lepidoptera;Erebia manto;NA;0.187;Erebia bubastis;0.999973083726829;  
MH670214;Lepidoptera;Erebia manto;NA;0.067;Erebia bubastis;0.999969987709769;  
MH670215;Lepidoptera;Erebia manto;Erebia manto;NA;Erebia bubastis;0.999769088786808;  
MH670216;Lepidoptera;Erebia manto;NA;0.187;Erebia bubastis;0.999973083726829;  
MH670217;Lepidoptera;Erebia manto;NA;0.054;Erebia bubastis;0.999954422787626;  
MH670218;Lepidoptera;Erebia manto;NA;0.187;Erebia bubastis;0.999973083726829;  
MH670219;Lepidoptera;Erebia manto;NA;NA;NA;0.869827053877523;  
MH670220;Lepidoptera;Erebia manto;NA;0.009;Erebia bubastis;0.999981998688491;  
MH670221;Lepidoptera;Erebia manto;NA;0.187;Erebia bubastis;0.999972982836091;  
MH670222;Lepidoptera;Erebia eriphyle;Erebia eriphyle;1;NA;0.795999353777463;  
MH670223;Lepidoptera;Erebia manto;NA;0.073;Erebia bubastis;0.999956603717016;  
MH670224;Lepidoptera;Erebia manto;NA;0.174;Erebia bubastis;0.999971763691585;  
MH670225;Lepidoptera;Erebia manto;NA;0.174;Erebia bubastis;0.999970399901456;  
MH670226;Lepidoptera;Erebia manto;NA;0.187;Erebia bubastis;0.999972982836091;  
MH670227;Lepidoptera;Erebia manto;NA;NA;Erebia bubastis;0.999928470140733;  
MH670228;Lepidoptera;Erebia manto;NA;0.174;Erebia bubastis;0.999970541605215;

MH670229;Lepidoptera;Erebia manto;NA;0.009;Erebia bubastis;0.999982898283498;  
MH670230;Lepidoptera;Erebia manto;NA;0.161;Erebia bubastis;0.986242916492014;  
MH670231;Lepidoptera;Erebia eriphyle;Erebia eriphyle;1;NA;0.795999353777463;  
MH670232;Lepidoptera;Erebia manto;NA;NA;Erebia manto;0.998390110509447;  
MH670233;Lepidoptera;Erebia manto;Erebia manto;NA;Erebia bubastis;0.999886022205242;  
MH670234;Lepidoptera;Erebia manto;NA;0.071;Erebia bubastis;0.999958106329886;  
MH670235;Lepidoptera;Erebia manto;NA;0.174;Erebia bubastis;0.999970399901456;  
MH670236;Lepidoptera;Erebia manto;NA;0.174;Erebia bubastis;0.99996840517015;  
MIMAB007-21;Lepidoptera;Colias alfacariensis;Colias alfacariensis;0.001;Colias  
alfacariensis;0.999906024479126;  
MIMAB008-21;Lepidoptera;Cupido argiades;NA;0.485;NA;0.999999999956215;  
MIMAB009-21;Lepidoptera;Cupido argiades;NA;0.485;NA;0.999999999956215;  
MIMAB010-21;Lepidoptera;Pieris napi;NA;0.023;Pieris napi;0.906511131816347;  
MIMAB011-21;Lepidoptera;Cupido minimus;NA;0.001;Cupido minimus;0.999561411197707;  
MIMAB015-21;Lepidoptera;Cupido alcetas;NA;0.206;Cupido alcetas;0.779913020015273;  
MIMAB016-21;Lepidoptera;Cupido minimus;NA;0.001;Cupido minimus;0.999561411197707;  
MIMAB018-21;Lepidoptera;Plebejus argus;NA;NA;Plebejus argus;0.925616774870762;  
MIMAB019-21;Lepidoptera;Polyommatus thersites;NA;0.084;Polyommatus thersites;0.999999717339063;  
MIMAB020-21;Lepidoptera;Plebejus argus;NA;0.124;Plebejus argus;0.964152976292701;  
MIMAB024-21;Lepidoptera;Plebejus argus;NA;0.107;Plebejus argus;0.959600391999422;  
MIMAB025-21;Lepidoptera;Plebejus argus;NA;0.001;Plebejus argus;0.915815988501866;  
MIMAB026-21;Lepidoptera;Cupido minimus;NA;0.001;Cupido minimus;0.999561411197707;  
MIMAB027-21;Lepidoptera;Cyaniris semiargus;NA;NA;Cyaniris semiargus;0.998328437758208;  
MIMAB028-21;Lepidoptera;Colias alfacariensis;Colias alfacariensis;1;Colias  
alfacariensis;0.999982848414142;  
MIMAB029-21;Lepidoptera;Cupido minimus;NA;0.001;Cupido minimus;0.999561411197707;  
MIMAB030-21;Lepidoptera;Cupido minimus;NA;0.001;Cupido minimus;0.999561411197707;  
MIMAB031-21;Lepidoptera;Polyommatus dorylas;NA;0.003;Polyommatus dorylas;0.983348973322966;  
MIMAB032-21;Lepidoptera;Polyommatus dorylas;Polyommatus dorylas;0.007;Polyommatus  
dorylas;0.985357223577053;  
MIMAB034-21;Lepidoptera;Plebejus argus;NA;0.312;Plebejus argus;0.959981154917144;  
MIMAB035-21;Lepidoptera;Polyommatus thersites;Polyommatus thersites;0.001;Polyommatus  
thersites;0.999999810731499;  
MIMAB036-21;Lepidoptera;Plebejus idas;NA;0.004;NA;0.98802695424595;  
MIMAB037-21;Lepidoptera;Polyommatus escheri;Polyommatus escheri;1;Polyommatus  
escheri;0.998452839845543;  
MIMAB038-21;Lepidoptera;Polyommatus escheri;Polyommatus escheri;0.998;Polyommatus  
escheri;0.994962659025331;  
MIMAB040-21;Lepidoptera;Aricia artaxerxes;NA;0.001;Aricia artaxerxes;0.999371219094886;  
MIMAB041-21;Lepidoptera;Plebejus idas;NA;0.004;NA;0.98802695424595;  
MIMAB044-21;Lepidoptera;Erebia epiphron;NA;0.026;Erebia epiphron;0.987135038251135;  
MIMAB045-21;Lepidoptera;Erebia medusa;NA;0.009;Erebia medusa;0.977889176387507;  
MIMAB047-21;Lepidoptera;Erebia oeme;NA;0.127;Erebia oeme;0.9999999980264;  
MIMAB048-21;Lepidoptera;Melitaea britomartis;Melitaea britomartis;NA;Melitaea  
britomartis;0.895364772813994;  
MIMAB049-21;Lepidoptera;Aricia artaxerxes;NA;0.001;Aricia artaxerxes;0.999371219094886;  
MIMAB050-21;Lepidoptera;Melitaea didyma;Melitaea didyma;1;Melitaea didyma;0.983780737467472;  
MIMAB058-21;Lepidoptera;Coenonympha pamphilus;Coenonympha pamphilus;1;Coenonympha  
pamphilus;0.99999999997755;  
MIMAB059-21;Lepidoptera;Hipparchia semele;NA;NA;NA;0.999999999999977;  
MK155178;Lepidoptera;Erebia epiphron;NA;NA;Erebia epiphron;0.994401488812176;  
MK155179;Lepidoptera;Erebia epiphron;NA;NA;Erebia epiphron;0.994401488812176;  
MK155180;Lepidoptera;Erebia epiphron;Erebia epiphron;0.01;Erebia epiphron;0.995390903570694;  
MK155181;Lepidoptera;Erebia epiphron;Erebia epiphron;1;Erebia epiphron;0.99544005977253;  
MK155183;Lepidoptera;Erebia epiphron;Erebia epiphron;NA;Erebia epiphron;0.997944792650423;  
MK155184;Lepidoptera;Erebia epiphron;Erebia epiphron;NA;Erebia epiphron;0.995580956478864;  
MK155185;Lepidoptera;Erebia epiphron;Erebia epiphron;1;Erebia epiphron;0.99544005977253;  
MK155187;Lepidoptera;Erebia epiphron;Erebia epiphron;1;Erebia epiphron;0.99544005977253;  
MK155188;Lepidoptera;Erebia epiphron;Erebia epiphron;1;Erebia epiphron;0.99544005977253;  
MK155190;Lepidoptera;Erebia epiphron;Erebia epiphron;NA;Erebia epiphron;0.997944792650423;  
MK155191;Lepidoptera;Erebia epiphron;Erebia epiphron;1;Erebia epiphron;0.99544005977253;  
MK155192;Lepidoptera;Erebia epiphron;NA;NA;Erebia epiphron;0.997605378796729;  
MK155193;Lepidoptera;Erebia epiphron;Erebia epiphron;NA;Erebia epiphron;0.995231643306052;  
MK155194;Lepidoptera;Erebia epiphron;NA;NA;Erebia epiphron;0.995769974843751;  
MK155195;Lepidoptera;Erebia epiphron;Erebia epiphron;0.002;Erebia epiphron;0.998011506298672;  
MK155196;Lepidoptera;Erebia epiphron;Erebia epiphron;NA;Erebia epiphron;0.998243429957028;  
MK155197;Lepidoptera;Erebia epiphron;Erebia epiphron;NA;Erebia epiphron;0.998704677292374;  
MK155198;Lepidoptera;Erebia epiphron;NA;NA;Erebia epiphron;0.950006471153786;  
MK155199;Lepidoptera;Erebia epiphron;Erebia epiphron;NA;Erebia epiphron;0.998704677292374;  
MK155202;Lepidoptera;Erebia epiphron;NA;NA;Erebia epiphron;0.991535930833796;  
MK155204;Lepidoptera;Erebia epiphron;Erebia epiphron;NA;Erebia epiphron;0.995228972998118;  
MK155205;Lepidoptera;Erebia epiphron;NA;NA;Erebia epiphron;0.994401488812176;  
MK155208;Lepidoptera;Erebia epiphron;NA;NA;Erebia epiphron;0.997605378796729;  
MK155210;Lepidoptera;Erebia epiphron;Erebia epiphron;1;Erebia epiphron;0.99544005977253;  
MK155211;Lepidoptera;Erebia epiphron;NA;NA;Erebia epiphron;0.994401488812176;  
MK155212;Lepidoptera;Erebia epiphron;NA;NA;Erebia epiphron;0.994401488812176;  
MK155213;Lepidoptera;Erebia epiphron;NA;NA;Erebia epiphron;0.994401488812176;  
MK155214;Lepidoptera;Erebia epiphron;Erebia epiphron;NA;Erebia epiphron;0.995228972998118;

MK155215;Lepidoptera;Erebia epiphron;NA;NA;Erebia epiphron;0.994401488812176;  
MK155216;Lepidoptera;Erebia epiphron;Erebia epiphron;0.996;Erebia epiphron;0.998796590633588;  
MK155217;Lepidoptera;Erebia epiphron;Erebia epiphron;1;Erebia epiphron;0.99544005977253;  
MK186080;Lepidoptera;Aglais urticae;NA;NA;Aglais urticae;0.974538026641371;  
MK186081;Lepidoptera;Aglais urticae;Aglais urticae;NA;Aglais urticae;0.99231717704338;  
MK186082;Lepidoptera;Aglais urticae;Aglais urticae;0.001;Aglais urticae;0.985008525192552;  
MK186083;Lepidoptera;Aglais urticae;NA;NA;Aglais urticae;0.978490324720571;  
MK186084;Lepidoptera;Agriades glandon;NA;NA;Agriades glandon;0.98218506866083;  
MK186085;Lepidoptera;Agriades glandon;NA;0.005;Agriades glandon;0.968622708022137;  
MK186086;Lepidoptera;Agriades glandon;NA;0.002;Agriades glandon;0.986680741313409;  
MK186087;Lepidoptera;Agriades glandon;NA;0.038;Agriades glandon;0.987540286070852;  
MK186088;Lepidoptera;Agriades optilete;Agriades optilete;1;Agriades optilete;0.999999974686574;  
MK186089;Lepidoptera;Agriades optilete;Agriades optilete;1;Agriades optilete;0.999999950306575;  
MK186090;Lepidoptera;Agriades optilete;Agriades optilete;1;Agriades optilete;0.999999950306575;  
MK186091;Lepidoptera;Agriades optilete;Agriades optilete;1;Agriades optilete;0.999999745052439;  
MK186092;Lepidoptera;Agriades orbitulus;NA;0.007;Agriades orbitulus;0.998942443899012;  
MK186093;Lepidoptera;Agriades orbitulus;NA;0.006;Agriades orbitulus;0.999040289385503;  
MK186094;Lepidoptera;Agriades orbitulus;Agriades orbitulus;0.003;Agriades orbitulus;0.999098836056467;  
MK186095;Lepidoptera;Agriades orbitulus;Agriades orbitulus;NA;Agriades orbitulus;0.999377047866573;  
MK186096;Lepidoptera;Anthocharis cardamines;Anthocharis cardamines;1;Anthocharis cardamines;0.999999966992391;  
MK186097;Lepidoptera;Anthocharis cardamines;Anthocharis cardamines;1;Anthocharis cardamines;0.999999985613698;  
MK186098;Lepidoptera;Anthocharis cardamines;Anthocharis cardamines;1;Anthocharis cardamines;0.999999286738698;  
MK186099;Lepidoptera;Anthocharis cardamines;Anthocharis cardamines;1;Anthocharis cardamines;0.999999925419277;  
MK186100;Lepidoptera;Apatura ilia;NA;NA;Apatura ilia;0.953937859846525;  
MK186101;Lepidoptera;Apatura ilia;NA;0.15;Apatura ilia;0.914163962669637;  
MK186102;Lepidoptera;Apatura ilia;NA;NA;Apatura ilia;0.95526521600974;  
MK186103;Lepidoptera;Apatura iris;Apatura iris;1;Apatura iris;0.999999999999574;  
MK186104;Lepidoptera;Apatura iris;Apatura iris;1;Apatura iris;0.999999999999972;  
MK186105;Lepidoptera;Aphantopus hyperantus;Aphantopus hyperantus;0.005;Aphantopus hyperantus;0.999999378983625;  
MK186106;Lepidoptera;Aphantopus hyperantus;Aphantopus hyperantus;0.004;Aphantopus hyperantus;0.999996737240601;  
MK186107;Lepidoptera;Aphantopus hyperantus;Aphantopus hyperantus;0.005;Aphantopus hyperantus;0.999999378983625;  
MK186108;Lepidoptera;Aphantopus hyperantus;Aphantopus hyperantus;1;Aphantopus hyperantus;0.999997342368381;  
MK186109;Lepidoptera;Aphantopus hyperantus;Aphantopus hyperantus;0.01;Aphantopus hyperantus;0.999445556923408;  
MK186110;Lepidoptera;Aporia crataegi;NA;NA;Aporia crataegi;0.999994725800359;  
MK186111;Lepidoptera;Aporia crataegi;NA;NA;Aporia crataegi;0.999973074492637;  
MK186112;Lepidoptera;Aporia crataegi;NA;0.001;Aporia crataegi;0.999986855609891;  
MK186113;Lepidoptera;Aporia crataegi;NA;0.021;Aporia crataegi;0.999991009226137;  
MK186114;Lepidoptera;Aporia crataegi;NA;0.003;Aporia crataegi;0.999980213730065;  
MK186115;Lepidoptera;Aporia crataegi;NA;0.057;Aporia crataegi;0.999959095839193;  
MK186116;Lepidoptera;Aporia crataegi;NA;NA;Aporia crataegi;0.999994725800359;  
MK186117;Lepidoptera;Araschnia levana;Araschnia levana;1;Araschnia levana;0.999999414185426;  
MK186118;Lepidoptera;Araschnia levana;Araschnia levana;1;Araschnia levana;0.999999711999648;  
MK186119;Lepidoptera;Araschnia levana;Araschnia levana;1;Araschnia levana;0.999999711999648;  
MK186122;Lepidoptera;Argynnis paphia;Argynnis paphia;1;Argynnis paphia;0.999999991055574;  
MK186123;Lepidoptera;Aricia agestis;NA;0.187;Aricia agestis;0.996420870963052;  
MK186124;Lepidoptera;Aricia agestis;NA;0.202;Aricia agestis;0.993185236523708;  
MK186125;Lepidoptera;Aricia agestis;NA;0.208;Aricia agestis;0.997002229916662;  
MK186126;Lepidoptera;Aricia agestis;NA;0.208;Aricia agestis;0.997002229916662;  
MK186127;Lepidoptera;Aricia agestis;NA;0.208;Aricia agestis;0.997002229916662;  
MK186128;Lepidoptera;Aricia agestis;NA;0.208;Aricia agestis;0.997002229916662;  
MK186129;Lepidoptera;Aricia agestis;NA;0.121;Aricia agestis;0.991407746092031;  
MK186130;Lepidoptera;Aricia artaxerxes;Aricia artaxerxes;0.041;Aricia artaxerxes;0.99874233829851;  
MK186131;Lepidoptera;Aricia artaxerxes;NA;0.397;Aricia artaxerxes;0.999459966837446;  
MK186132;Lepidoptera;Aricia artaxerxes;NA;0.317;Aricia artaxerxes;0.999237960024884;  
MK186133;Lepidoptera;Aricia artaxerxes;Plebejus argus;1;Aricia artaxerxes;0.999753293634469;  
MK186134;Lepidoptera;Aricia artaxerxes;NA;0.5;Aricia artaxerxes;0.999632282267446;  
MK186135;Lepidoptera;Aricia artaxerxes;Aricia artaxerxes;0.041;Aricia artaxerxes;0.99874233829851;  
MK186136;Lepidoptera;Aricia artaxerxes;NA;0.002;Aricia artaxerxes;0.998931573225529;  
MK186137;Lepidoptera;Aricia artaxerxes;NA;0.384;Aricia artaxerxes;0.999542610958834;  
MK186138;Lepidoptera;Aricia artaxerxes;Plebejus argus;1;Aricia artaxerxes;0.999753293634469;  
MK186139;Lepidoptera;Aricia artaxerxes;NA;0.397;Aricia artaxerxes;0.999459966837446;  
MK186140;Lepidoptera;Aricia artaxerxes;Plebejus argus;1;Aricia artaxerxes;0.999753293634469;  
MK186141;Lepidoptera;Aricia artaxerxes;Plebejus argus;1;Aricia artaxerxes;0.999682677463404;  
MK186146;Lepidoptera;Boloria dia;Boloria dia;1;Boloria dia;0.99999999977035;  
MK186147;Lepidoptera;Boloria dia;Boloria dia;1;Boloria dia;0.99999999972431;



MK186148;Lepidoptera;Boloria dia;Boloria dia;1;Boloria dia;0.9999999999865;  
MK186149;Lepidoptera;Boloria dia;Boloria dia;1;Boloria dia;0.999999999977746;  
MK186150;Lepidoptera;Boloria dia;Boloria dia;1;Boloria dia;0.999999999943299;  
MK186151;Lepidoptera;Boloria euphrosyne;Boloria euphrosyne;0.004;Boloria euphrosyne;0.999985940608651;  
MK186152;Lepidoptera;Boloria euphrosyne;Boloria euphrosyne;1;Boloria euphrosyne;0.999974952837756;  
MK186153;Lepidoptera;Boloria euphrosyne;Boloria euphrosyne;0.001;Boloria euphrosyne;0.999955433068631;  
MK186154;Lepidoptera;Boloria euphrosyne;Boloria euphrosyne;0.999;Boloria euphrosyne;0.999983438110448;  
MK186155;Lepidoptera;Boloria euphrosyne;Boloria euphrosyne;0.005;Boloria euphrosyne;0.99998578072882;  
MK186156;Lepidoptera;Boloria euphrosyne;Boloria euphrosyne;NA;Boloria euphrosyne;0.999987404178288;  
MK186157;Lepidoptera;Boloria euphrosyne;Boloria euphrosyne;0.005;Boloria euphrosyne;0.99998578072882;  
MK186161;Lepidoptera;Boloria pales;Boloria pales;0.001;Boloria pales;0.998878070533085;  
MK186167;Lepidoptera;Boloria thore;Boloria thore;1;Boloria thore;0.999999998965706;  
MK186168;Lepidoptera;Boloria thore;Boloria thore;1;Boloria thore;0.9999999984596;  
MK186169;Lepidoptera;Boloria thore;Boloria thore;1;Boloria thore;0.99999999936594;  
MK186170;Lepidoptera;Boloria thore;Boloria thore;1;Boloria thore;0.9999999984596;  
MK186171;Lepidoptera;Boloria titania;Boloria titania;0.999;Boloria titania;0.999841641491547;  
MK186172;Lepidoptera;Boloria titania;Boloria titania;0.999;Boloria titania;0.999841641491547;  
MK186173;Lepidoptera;Boloria titania;Boloria titania;0.999;Boloria titania;0.999862683205575;  
MK186174;Lepidoptera;Boloria titania;Boloria titania;0.998;Boloria titania;0.999884662749941;  
MK186175;Lepidoptera;Brenthis daphne;Brenthis daphne;1;Brenthis daphne;0.998484609842471;  
MK186176;Lepidoptera;Brenthis daphne;Brenthis daphne;0.003;Brenthis daphne;0.996304540060505;  
MK186177;Lepidoptera;Brenthis daphne;Brenthis daphne;1;Brenthis daphne;0.998355654244706;  
MK186178;Lepidoptera;Brenthis daphne;Brenthis daphne;1;Brenthis daphne;0.9972710834386;  
MK186179;Lepidoptera;Brenthis ino;Brenthis ino;0.013;Brenthis ino;0.963059327700735;  
MK186180;Lepidoptera;Brenthis ino;Brenthis ino;1;Brenthis ino;0.998333833872941;  
MK186181;Lepidoptera;Brenthis ino;Brenthis ino;1;Brenthis ino;0.995925740941182;  
MK186182;Lepidoptera;Brenthis ino;Brenthis ino;0.001;Brenthis ino;0.997846586011011;  
MK186183;Lepidoptera;Brenthis ino;Brenthis ino;0.005;Brenthis ino;0.977015191874501;  
MK186184;Lepidoptera;Brenthis ino;Brenthis ino;0.001;Brenthis ino;0.998453563477944;  
MK186185;Lepidoptera;Brintesia circe;Brintesia circe;1;Brintesia circe;0.999999800536918;  
MK186186;Lepidoptera;Brintesia circe;Brintesia circe;1;Brintesia circe;0.999999787064462;  
MK186187;Lepidoptera;Brintesia circe;Brintesia circe;1;Brintesia circe;0.999999789669851;  
MK186190;Lepidoptera;Callophrys rubi;NA;0.008;Callophrys rubi;0.972346549947987;  
MK186191;Lepidoptera;Callophrys rubi;NA;0.041;Callophrys rubi;0.998365812030464;  
MK186192;Lepidoptera;Callophrys rubi;NA;0.006;Callophrys rubi;0.997005454794404;  
MK186193;Lepidoptera;Callophrys rubi;NA;0.001;Callophrys rubi;0.995967322192437;  
MK186194;Lepidoptera;Carcharodus alceae;Carcharodus alceae;0.998;Carcharodus alceae;0.999999989147739;  
MK186195;Lepidoptera;Carcharodus alceae;Carcharodus alceae;0.001;Carcharodus alceae;0.999999997919389;  
MK186196;Lepidoptera;Carcharodus alceae;Carcharodus alceae;1;Carcharodus alceae;0.999999998403723;  
MK186199;Lepidoptera;Carcharodus lavatherae;NA;0.055;Carcharodus lavatherae;0.997031739414004;  
MK186200;Lepidoptera;Carcharodus lavatherae;NA;0.185;Carcharodus lavatherae;0.996619545330546;  
MK186201;Lepidoptera;Carterocephalus palaemon;NA;0.047;Carterocephalus palaemon;0.723411819709686;  
MK186202;Lepidoptera;Carterocephalus palaemon;Carterocephalus palaemon;0.017;Carterocephalus palaemon;0.868047837100633;  
MK186203;Lepidoptera;Carterocephalus palaemon;NA;0.038;Carterocephalus palaemon;0.750224854704037;  
MK186204;Lepidoptera;Celastrina argiolus;Celastrina argiolus;1;Celastrina argiolus;0.999508885935436;  
MK186205;Lepidoptera;Celastrina argiolus;Celastrina argiolus;1;Celastrina argiolus;0.999508885935436;  
MK186206;Lepidoptera;Celastrina argiolus;Celastrina argiolus;1;Celastrina argiolus;0.999508885935436;  
MK186207;Lepidoptera;Chazara briseis;Chazara briseis;0.007;Chazara briseis;0.999938841544398;  
MK186208;Lepidoptera;Coenonympha arcania;NA;0.077;Coenonympha arcania;0.986212060422033;  
MK186209;Lepidoptera;Coenonympha arcania;Coenonympha arcania;0.012;Coenonympha arcania;0.99564845864458;  
MK186210;Lepidoptera;Coenonympha arcania;NA;0.156;Coenonympha arcania;0.94930496508595;  
MK186211;Lepidoptera;Coenonympha arcania;NA;0.066;Coenonympha arcania;0.981477171365832;  
MK186212;Lepidoptera;Coenonympha arcania;NA;0.187;Coenonympha arcania;0.966116481342013;  
MK186213;Lepidoptera;Coenonympha darwiniana;NA;0.01;Coenonympha darwiniana;0.740760258919092;  
MK186214;Lepidoptera;Coenonympha darwiniana;NA;0.002;NA;0.99999999999989;  
MK186215;Lepidoptera;Coenonympha darwiniana;NA;0.001;NA;0.99999999999997;  
MK186216;Lepidoptera;Coenonympha darwiniana;NA;0.001;NA;0.99999999999997;  
MK186217;Lepidoptera;Coenonympha darwiniana;NA;0.211;NA;0.99999999999998;  
MK186218;Lepidoptera;Coenonympha darwiniana;NA;0.001;NA;0.99999999999997;  
MK186219;Lepidoptera;Coenonympha darwiniana;NA;0.001;NA;0.99999999999997;  
MK186220;Lepidoptera;Coenonympha darwiniana;NA;NA;0.99999999999872;

MK186221;Lepidoptera;Coenonympha darwiniana;NA;0.001;NA;0.999999999999997;  
MK186222;Lepidoptera;Coenonympha darwiniana;NA;0.028;NA;0.999999999999925;  
MK186223;Lepidoptera;Coenonympha gardetta;NA;0.004;Coenonympha gardetta;0.733118270257489;  
MK186224;Lepidoptera;Coenonympha gardetta;NA;0.002;NA;0.999999999999969;  
MK186225;Lepidoptera;Coenonympha gardetta;NA;0.001;NA;0.999999999999919;  
MK186226;Lepidoptera;Coenonympha gardetta;NA;0.002;NA;0.999999999999937;  
MK186227;Lepidoptera;Coenonympha gardetta;NA;0.016;NA;0.999999999999819;  
MK186228;Lepidoptera;Coenonympha gardetta;NA;0.007;NA;0.999999999999982;  
MK186229;Lepidoptera;Coenonympha glycerion;NA;0.243;Coenonympha glycerion;0.999998186312577;  
MK186230;Lepidoptera;Coenonympha pamphilus;Coenonympha pamphilus;1;Coenonympha  
pamphilus;0.9999999999999687;  
MK186231;Lepidoptera;Coenonympha pamphilus;Coenonympha pamphilus;1;Coenonympha  
pamphilus;0.999999999999784;  
MK186232;Lepidoptera;Coenonympha pamphilus;Coenonympha pamphilus;1;Coenonympha  
pamphilus;0.9999999999998892;  
MK186233;Lepidoptera;Coenonympha pamphilus;Coenonympha pamphilus;1;Coenonympha  
pamphilus;0.99999999999987693;  
MK186234;Lepidoptera;Coenonympha pamphilus;Coenonympha pamphilus;1;Coenonympha  
pamphilus;0.99999999999988404;  
MK186241;Lepidoptera;Colias alfacariensis;Colias alfacariensis;1;Colias  
alfacariensis;0.999917135509572;  
MK186242;Lepidoptera;Colias alfacariensis;Colias alfacariensis;1;Colias  
alfacariensis;0.999917135509572;  
MK186243;Lepidoptera;Colias alfacariensis;Colias alfacariensis;1;Colias  
alfacariensis;0.999807197845331;  
MK186244;Lepidoptera;Colias alfacariensis;Colias alfacariensis;1;Colias  
alfacariensis;0.999810175580931;  
MK186245;Lepidoptera;Colias alfacariensis;Colias alfacariensis;1;Colias  
alfacariensis;0.999917135509572;  
MK186246;Lepidoptera;Colias croceus;NA;NA;NA;0.9999999999999422;  
MK186247;Lepidoptera;Colias croceus;NA;NA;NA;0.9999999999999755;  
MK186248;Lepidoptera;Colias croceus;NA;0.047;NA;0.9999999999998457;  
MK186249;Lepidoptera;Colias croceus;NA;NA;NA;0.9999999999999755;  
MK186250;Lepidoptera;Colias croceus;NA;NA;NA;0.9999999999999755;  
MK186251;Lepidoptera;Colias croceus;NA;NA;NA;0.9999999999999755;  
MK186252;Lepidoptera;Colias croceus;NA;NA;NA;0.9999999999999755;  
MK186253;Lepidoptera;Colias hyale;Colias hyale;0.012;Colias hyale;0.999995743525396;  
MK186254;Lepidoptera;Colias hyale;Colias hyale;0.013;Colias hyale;0.999998205688247;  
MK186255;Lepidoptera;Colias hyale;Colias hyale;0.009;Colias hyale;0.999996135088304;  
MK186256;Lepidoptera;Colias hyale;Colias hyale;0.011;Colias hyale;0.999998744338079;  
MK186257;Lepidoptera;Colias hyale;Colias hyale;0.02;Colias hyale;0.999998277106761;  
MK186258;Lepidoptera;Colias hyale;Colias hyale;0.013;Colias hyale;0.999998205688247;  
MK186259;Lepidoptera;Colias palaeno;NA;0.001;NA;0.99999999999983139;  
MK186260;Lepidoptera;Colias palaeno;NA;0.001;NA;0.99999999999983139;  
MK186261;Lepidoptera;Colias phicomone;NA;0.001;Colias phicomone;0.986499654897221;  
MK186262;Lepidoptera;Colias phicomone;NA;0.001;Colias phicomone;0.986499654897221;  
MK186263;Lepidoptera;Colias phicomone;NA;0.001;Colias phicomone;0.986499654897221;  
MK186264;Lepidoptera;Colias phicomone;NA;NA;Colias phicomone;0.985642572028338;  
MK186265;Lepidoptera;Cupido alcetas;NA;0.081;Cupido alcetas;0.896139503165777;  
MK186266;Lepidoptera;Cupido alcetas;NA;0.202;Cupido alcetas;0.833431942737901;  
MK186267;Lepidoptera;Cupido argiades;NA;0.486;NA;0.99999999999981462;  
MK186268;Lepidoptera;Cupido argiades;NA;NA;NA;0.99999999999978974;  
MK186269;Lepidoptera;Cupido minimus;NA;0.003;Cupido minimus;0.999692883885763;  
MK186270;Lepidoptera;Cupido minimus;NA;0.006;Cupido minimus;0.999784309190108;  
MK186271;Lepidoptera;Cupido minimus;NA;0.006;Cupido minimus;0.999784309190108;  
MK186272;Lepidoptera;Cupido minimus;NA;0.004;Cupido minimus;0.999836565963549;  
MK186273;Lepidoptera;Cupido minimus;NA;0.006;Cupido minimus;0.999784309190108;  
MK186274;Lepidoptera;Cupido osiris;Cupido osiris;1;Cupido osiris;0.999999358185626;  
MK186296;Lepidoptera;Erebia christi;Erebia christi;1;Erebia christi;0.99999999999952564;  
MK186297;Lepidoptera;Erebia epiphron;Erebia epiphron;NA;Erebia epiphron;0.996531582765566;  
MK186298;Lepidoptera;Erebia epiphron;Erebia epiphron;NA;Erebia epiphron;0.998174897162984;  
MK186299;Lepidoptera;Erebia epiphron;NA;NA;Erebia epiphron;0.992450795577526;  
MK186300;Lepidoptera;Erebia epiphron;Erebia epiphron;NA;Erebia epiphron;0.986636093736547;  
MK186301;Lepidoptera;Erebia eriphyle;Erebia eriphyle;1;Erebia eriphyle;0.999999987544129;  
MK186302;Lepidoptera;Erebia eriphyle;Erebia eriphyle;1;Erebia eriphyle;0.999999987544129;  
MK186303;Lepidoptera;Erebia eriphyle;Erebia eriphyle;1;Erebia eriphyle;0.999999990333691;  
MK186304;Lepidoptera;Erebia eriphyle;Erebia eriphyle;1;Erebia eriphyle;0.999999987544129;  
MK186305;Lepidoptera;Erebia eriphyle;Erebia eriphyle;1;Erebia eriphyle;0.999999920194486;  
MK186306;Lepidoptera;Erebia eriphyle;Erebia eriphyle;1;Erebia eriphyle;0.999999990333691;  
MK186307;Lepidoptera;Erebia euryale;NA;NA;Erebia euryale;0.964425776567244;  
MK186308;Lepidoptera;Erebia euryale;NA;NA;Erebia euryale;0.954958114812306;  
MK186309;Lepidoptera;Erebia euryale;NA;NA;Erebia euryale;0.838371298441091;  
MK186310;Lepidoptera;Erebia euryale;NA;NA;Erebia euryale;0.906848875243797;  
MK186311;Lepidoptera;Erebia euryale;NA;NA;Erebia euryale;0.940627137105066;  
MK186323;Lepidoptera;Erebia manto;Erebia manto;0.999;Erebia manto;0.999992810437002;  
MK186324;Lepidoptera;Erebia manto;NA;0.126;Erebia manto;0.993934190700102;  
MK186325;Lepidoptera;Erebia manto;Erebia manto;1;Erebia manto;0.999979589980411;  
MK186326;Lepidoptera;Erebia manto;NA;0.183;Erebia manto;0.996820734645775;

MK186327;Lepidoptera;Erebia medusa;NA;0.011;Erebia medusa;0.987418637428601;  
MK186328;Lepidoptera;Erebia medusa;NA;0.022;Erebia medusa;0.983487707416184;  
MK186329;Lepidoptera;Erebia medusa;NA;0.002;Erebia medusa;0.98750185515635;  
MK186330;Lepidoptera;Erebia medusa;NA;0.012;Erebia medusa;0.993036538842292;  
MK186331;Lepidoptera;Erebia melampus;Erebia melampus;0.005;Erebia melampus;0.966311213048524;  
MK186332;Lepidoptera;Erebia melampus;Erebia melampus;NA;Erebia melampus;0.963807699896503;  
MK186333;Lepidoptera;Erebia melampus;Erebia melampus;0.007;Erebia melampus;0.966244394936425;  
MK186334;Lepidoptera;Erebia meolans;Erebia meolans;0.012;Erebia meolans;0.998938281528579;  
MK186335;Lepidoptera;Erebia meolans;NA;NA;Erebia meolans;0.999592058097425;  
MK186336;Lepidoptera;Erebia meolans;Erebia meolans;NA;Erebia meolans;0.999801286702286;  
MK186337;Lepidoptera;Erebia meolans;NA;NA;Erebia meolans;0.999592058097425;  
MK186338;Lepidoptera;Erebia meolans;NA;NA;Erebia meolans;0.998679248695771;  
MK186339;Lepidoptera;Erebia mnestra;Erebia mnestra;0.999;Erebia mnestra;0.999932163532723;  
MK186340;Lepidoptera;Erebia mnestra;Erebia mnestra;0.999;Erebia mnestra;0.999932163532723;  
MK186341;Lepidoptera;Erebia mnestra;Erebia mnestra;0.999;Erebia mnestra;0.999932163532723;  
MK186342;Lepidoptera;Erebia mnestra;Erebia mnestra;0.999;Erebia mnestra;0.999871283181923;  
MK186343;Lepidoptera;Erebia montana;Erebia montana;1;Erebia montana;0.999184327703051;  
MK186344;Lepidoptera;Erebia montana;Erebia montana;1;Erebia montana;0.999184327703051;  
MK186345;Lepidoptera;Erebia montana;Erebia montana;0.999;Erebia montana;0.99720550965226;  
MK186346;Lepidoptera;Erebia montana;Erebia montana;1;Erebia montana;0.997858359689857;  
MK186347;Lepidoptera;Erebia nivalis;NA;NA;NA;0.999999999999936;  
MK186348;Lepidoptera;Erebia oeme;NA;0.27;Erebia oeme;0.999999999731443;  
MK186349;Lepidoptera;Erebia oeme;NA;0.147;Erebia oeme;0.99999999929599;  
MK186350;Lepidoptera;Erebia oeme;NA;0.179;Erebia oeme;0.999999999780613;  
MK186351;Lepidoptera;Erebia pandrose;Erebia pandrose;0.019;Erebia pandrose;0.979041351081006;  
MK186352;Lepidoptera;Erebia pandrose;Erebia pandrose;0.024;Erebia pandrose;0.990073867864573;  
MK186353;Lepidoptera;Erebia pandrose;Erebia pandrose;0.007;Erebia pandrose;0.986598859542406;  
MK186354;Lepidoptera;Erebia pandrose;Erebia pandrose;0.007;Erebia pandrose;0.986598859542406;  
MK186355;Lepidoptera;Erebia pandrose;Erebia pandrose;0.024;Erebia pandrose;0.975070318718481;  
MK186356;Lepidoptera;Erebia pharte;Erebia pharte;1;Erebia pharte;0.999999995722192;  
MK186357;Lepidoptera;Erebia pharte;Erebia pharte;1;Erebia pharte;0.999999989915807;  
MK186358;Lepidoptera;Erebia pharte;Erebia pharte;1;Erebia pharte;0.999999995722192;  
MK186359;Lepidoptera;Erebia pluto;Erebia pluto;1;Erebia pluto;0.999999924879208;  
MK186360;Lepidoptera;Erebia pluto;Erebia pluto;1;Erebia pluto;0.999999769636188;  
MK186361;Lepidoptera;Erebia pronoe;Erebia pronoe;1;Erebia pronoe;0.999681223232352;  
MK186362;Lepidoptera;Erebia pronoe;Erebia pronoe;0.999;Erebia pronoe;0.999752694597812;  
MK186363;Lepidoptera;Erebia pronoe;Erebia pronoe;1;Erebia pronoe;0.999455067091311;  
MK186364;Lepidoptera;Erebia pronoe;NA;NA;Erebia pronoe;0.741393290698191;  
MK186365;Lepidoptera;Erebia pronoe;Erebia pronoe;NA;Erebia pronoe;0.910578235158016;  
MK186366;Lepidoptera;Erebia styx;NA;0.062;Erebia styx;0.902168179723329;  
MK186369;Lepidoptera;Erebia triaria;NA;0.31;NA;0.999999999999988;  
MK186370;Lepidoptera;Erebia triaria;NA;0.315;NA;100.000.000.000.001;  
MK186371;Lepidoptera;Erebia tyndarus;NA;NA;NA;0.999999999999899;  
MK186372;Lepidoptera;Erebia tyndarus;NA;0.002;Erebia tyndarus;0.841879935623522;  
MK186373;Lepidoptera;Erebia tyndarus;NA;NA;NA;0.999999999999746;  
MK186374;Lepidoptera;Erebia tyndarus;NA;NA;NA;0.999999999999746;  
MK186375;Lepidoptera;Erebia tyndarus;NA;NA;NA;0.999999999999899;  
MK186376;Lepidoptera;Erebia tyndarus;NA;NA;NA;0.999999999999937;  
MK186377;Lepidoptera;Erebia tyndarus;NA;0.001;NA;0.999999999999996;  
MK186384;Lepidoptera;Aricia eumedon;Eumedonia eumedon;0.004;Eumedonia eumedon;0.997113153365715;  
MK186385;Lepidoptera;Aricia eumedon;Eumedonia eumedon;1;Eumedonia eumedon;0.995200162930918;  
MK186386;Lepidoptera;Aricia eumedon;Eumedonia eumedon;0.013;Eumedonia eumedon;0.996092387827183;  
MK186387;Lepidoptera;Euphydryas aurinia;NA;0.055;Euphydryas aurinia;0.995357604297629;  
MK186388;Lepidoptera;Euphydryas aurinia;NA;0.17;Euphydryas aurinia;0.925361068752259;  
MK186389;Lepidoptera;Euphydryas aurinia;NA;0.303;Euphydryas aurinia;0.992531196347835;  
MK186391;Lepidoptera;Euphydryas aurinia;NA;0.303;Euphydryas aurinia;0.992531196347835;  
MK186392;Lepidoptera;Euphydryas aurinia;NA;0.312;Euphydryas aurinia;0.977908833370082;  
MK186393;Lepidoptera;Euphydryas aurinia;NA;0.303;Euphydryas aurinia;0.992531196347835;  
MK186394;Lepidoptera;Euphydryas cynthia;Euphydryas cynthia;1;Euphydryas cynthia;0.99999999887271;  
MK186395;Lepidoptera;Euphydryas cynthia;Euphydryas cynthia;1;Euphydryas cynthia;0.99999999868578;  
MK186396;Lepidoptera;Euphydryas cynthia;Euphydryas cynthia;1;Euphydryas cynthia;0.99999999751026;  
MK186397;Lepidoptera;Euphydryas cynthia;Euphydryas cynthia;1;Euphydryas cynthia;0.99999999591722;  
MK186398;Lepidoptera;Euphydryas intermedia;NA;0.309;NA;0.999999999996329;  
MK186399;Lepidoptera;Euphydryas intermedia;NA;0.309;NA;0.999999999996329;  
MK186400;Lepidoptera;Euphydryas intermedia;NA;0.309;NA;0.999999999996329;  
MK186401;Lepidoptera;Fabriciana adippe;NA;0.01;Fabriciana adippe;0.825420270264828;  
MK186402;Lepidoptera;Fabriciana adippe;NA;0.009;Fabriciana adippe;0.811434168177779;  
MK186403;Lepidoptera;Fabriciana adippe;NA;NA;Fabriciana adippe;0.785717058301081;  
MK186404;Lepidoptera;Fabriciana adippe;NA;NA;Fabriciana adippe;0.846733684548914;  
MK186405;Lepidoptera;Fabriciana adippe;NA;NA;NA;0.99999999986551;  
MK186406;Lepidoptera;Fabriciana adippe;NA;0.009;Fabriciana adippe;0.811434168177779;  
MK186407;Lepidoptera;Fabriciana niobe;NA;0.003;Fabriciana niobe;0.99205397997248;  
MK186408;Lepidoptera;Fabriciana niobe;NA;0.003;Fabriciana niobe;0.990304513022067;  
MK186409;Lepidoptera;Fabriciana niobe;NA;0.003;Fabriciana niobe;0.99205397997248;

MK186410;Lepidoptera;Fabriciana niobe;NA;0.064;Fabriciana niobe;0.989112200722109;  
MK186411;Lepidoptera;Fabriciana niobe;NA;0.001;Fabriciana niobe;0.984432102210124;  
MK186412;Lepidoptera;Fabriciana niobe;NA;0.001;Fabriciana niobe;0.987973355744135;  
MK186413;Lepidoptera;Favonius quercus;NA;NA;NA;0.99999999997669;  
MK186414;Lepidoptera;Favonius quercus;NA;0.477;NA;0.99999999999351;  
MK186415;Lepidoptera;Favonius quercus;NA;0.321;NA;0.999999999703664;  
MK186416;Lepidoptera;Glaucopsyche alexis;Glaucopsyche alexis;0.001;Glaucopsyche alexis;0.963537137293225;  
MK186417;Lepidoptera;Glaucopsyche alexis;NA;0.001;Glaucopsyche alexis;0.914259738757796;  
MK186418;Lepidoptera;Gonepteryx rhamni;NA;0.499;Gonepteryx rhamni;0.985333803440189;  
MK186419;Lepidoptera;Gonepteryx rhamni;NA;0.467;Gonepteryx rhamni;0.977925311300942;  
MK186420;Lepidoptera;Gonepteryx rhamni;NA;0.467;Gonepteryx rhamni;0.977925311300942;  
MK186421;Lepidoptera;Gonepteryx rhamni;Gonepteryx rhamni;0.001;Gonepteryx rhamni;0.99981840321782;  
MK186422;Lepidoptera;Gonepteryx rhamni;Gonepteryx rhamni;0.006;Gonepteryx rhamni;0.999515928486512;  
MK186423;Lepidoptera;Gonepteryx rhamni;NA;0.467;Gonepteryx rhamni;0.977925311300942;  
MK186424;Lepidoptera;Hamearis lucina;NA;NA;Hamearis lucina;0.99999999987693;  
MK186425;Lepidoptera;Hamearis lucina;NA;NA;Hamearis lucina;0.99999999987693;  
MK186426;Lepidoptera;Hamearis lucina;NA;NA;Hamearis lucina;0.99999999987693;  
MK186427;Lepidoptera;Hamearis lucina;Hamearis lucina;NA;Hamearis lucina;0.99999999987438;  
MK186435;Lepidoptera;Hipparchia fagi;NA;NA;Hipparchia fagi;0.940167961922483;  
MK186436;Lepidoptera;Hipparchia fagi;NA;NA;Hipparchia fagi;0.92225238936553;  
MK186437;Lepidoptera;Hipparchia fagi;NA;NA;Hipparchia fagi;0.940167961922483;  
MK186441;Lepidoptera;Hipparchia semele;NA;0.001;Hipparchia semele;0.745166355974807;  
MK186442;Lepidoptera;Hipparchia semele;NA;NA;Hipparchia semele;0.777428011165802;  
MK186443;Lepidoptera;Hipparchia statilinus;Hipparchia statilinus;1;Hipparchia statilinus;0.99999999999176;  
MK186446;Lepidoptera;Iolana iolas;Iolana iolas;1;Iolana iolas;0.999999205380678;  
MK186448;Lepidoptera;Iphiclidides podalirius;NA;NA;Iphiclidides podalirius;0.928526609839125;  
MK186461;Lepidoptera;Lampides boeticus;Lampides boeticus;1;Lampides boeticus;0.99999999199133;  
MK186462;Lepidoptera;Lasiommata maera;Lasiommata maera;1;Lasiommata maera;0.999996837286971;  
MK186463;Lepidoptera;Lasiommata maera;Lasiommata maera;1;Lasiommata maera;0.999997390650514;  
MK186464;Lepidoptera;Lasiommata maera;Lasiommata maera;0.001;Lasiommata maera;0.999998440187903;  
MK186465;Lepidoptera;Lasiommata maera;Lasiommata maera;1;Lasiommata maera;0.999998364044702;  
MK186466;Lepidoptera;Lasiommata maera;Lasiommata maera;1;Lasiommata maera;0.999996837286971;  
MK186467;Lepidoptera;Lasiommata megera;Lasiommata megera;1;Lasiommata megera;0.99994124434038;  
MK186468;Lepidoptera;Lasiommata megera;Lasiommata megera;1;Lasiommata megera;0.99988037861634;  
MK186469;Lepidoptera;Lasiommata megera;Lasiommata megera;1;Lasiommata megera;0.999944012465835;  
MK186470;Lepidoptera;Lasiommata megera;Lasiommata megera;1;Lasiommata megera;0.999818946947674;  
MK186471;Lepidoptera;Lasiommata megera;Lasiommata megera;1;Lasiommata megera;0.999944012465835;  
MK186485;Lepidoptera;Limenitis camilla;NA;0.056;Limenitis camilla;0.999922140605573;  
MK186486;Lepidoptera;Limenitis camilla;Limenitis camilla;1;Limenitis camilla;0.99968161744423;  
MK186487;Lepidoptera;Limenitis camilla;NA;0.031;Limenitis camilla;0.999976358578457;  
MK186488;Lepidoptera;Limenitis camilla;NA;0.213;Limenitis camilla;0.999907155361037;  
MK186489;Lepidoptera;Limenitis camilla;NA;NA;Limenitis camilla;0.999903286812386;  
MK186498;Lepidoptera;Lycaena dispar;Lycaena dispar;1;Lycaena dispar;0.99999997276802;  
MK186499;Lepidoptera;Helleia helle;Lycaena helle;1;Lycaena helle;0.99999985376519;  
MK186500;Lepidoptera;Helleia helle;Lycaena helle;1;Lycaena helle;0.99999993429498;  
MK186502;Lepidoptera;Lycaena hippothoe;Lycaena hippothoe;NA;Lycaena hippothoe;0.978273581027692;  
MK186504;Lepidoptera;Lycaena hippothoe;NA;NA;Lycaena hippothoe;0.933880050432329;  
MK186505;Lepidoptera;Lycaena hippothoe;NA;NA;Lycaena hippothoe;0.794808795821834;  
MK186506;Lepidoptera;Lycaena hippothoe;NA;NA;Lycaena hippothoe;0.874227413846883;  
MK186507;Lepidoptera;Lycaena hippothoe;NA;NA;Lycaena hippothoe;0.869388816094577;  
MK186508;Lepidoptera;Lycaena hippothoe;NA;NA;Lycaena hippothoe;0.933880050432329;  
MK186510;Lepidoptera;Lycaena phlaeas;Lycaena phlaeas;1;Lycaena phlaeas;0.99999974578884;  
MK186511;Lepidoptera;Lycaena phlaeas;Lycaena phlaeas;1;Lycaena phlaeas;0.99999963570418;  
MK186512;Lepidoptera;Lycaena phlaeas;Lycaena phlaeas;1;Lycaena phlaeas;0.99999990854633;  
MK186513;Lepidoptera;Lycaena tityrus;Lycaena tityrus;1;Lycaena tityrus;0.99999565859004;  
MK186514;Lepidoptera;Lycaena tityrus;Lycaena tityrus;1;Lycaena tityrus;0.999995507615411;  
MK186515;Lepidoptera;Lycaena tityrus;Lycaena tityrus;1;Lycaena tityrus;0.999995507615411;  
MK186516;Lepidoptera;Lycaena tityrus;Lycaena tityrus;1;Lycaena tityrus;0.999995507615411;  
MK186517;Lepidoptera;Lycaena tityrus;Lycaena tityrus;1;Lycaena tityrus;0.999997596583785;  
MK186518;Lepidoptera;Lycaena tityrus;Lycaena tityrus;1;Lycaena tityrus;0.999998846372518;  
MK186519;Lepidoptera;Lycaena tityrus;Lycaena tityrus;1;Lycaena tityrus;0.999996515686308;  
MK186520;Lepidoptera;Lycaena tityrus;Lycaena tityrus;1;Lycaena tityrus;0.999998846372518;  
MK186521;Lepidoptera;Lycaena tityrus;Lycaena tityrus;1;Lycaena tityrus;0.999996150345644;  
MK186522;Lepidoptera;Lycaena tityrus;Lycaena tityrus;1;Lycaena tityrus;0.999991069734676;  
MK186523;Lepidoptera;Lycaena virgaureae;NA;0.226;Lycaena virgaureae;0.999331665618954;  
MK186524;Lepidoptera;Lycaena virgaureae;NA;0.234;Lycaena virgaureae;0.999568266359117;  
MK186527;Lepidoptera;Lysandra coridon;NA;NA;NA;0.997258082133847;  
MK186528;Lepidoptera;Lysandra coridon;Lysandra coridon;NA;Lysandra coridon;0.927795013241946;  
MK186529;Lepidoptera;Lysandra coridon;NA;NA;NA;0.997802687059559;  
MK186530;Lepidoptera;Lysandra coridon;NA;NA;NA;0.997802687059559;  
MK186531;Lepidoptera;Maniola jurtina;NA;0.005;NA;0.99999999999655;  
MK186532;Lepidoptera;Maniola jurtina;NA;0.005;NA;0.99999999999655;  
MK186533;Lepidoptera;Maniola jurtina;NA;0.007;NA;0.999999999991;  
MK186534;Lepidoptera;Maniola jurtina;NA;0.005;NA;0.99999999998714;

MK186535;Lepidoptera;Maniola jurtina;NA;0.005;NA;0.999999999999655;  
MK186548;Lepidoptera;Melitaea cinxia;Melitaea cinxia;1;Melitaea cinxia;0.999999999999545;  
MK186549;Lepidoptera;Melitaea cinxia;Melitaea cinxia;1;Melitaea cinxia;0.999999999999403;  
MK186550;Lepidoptera;Melitaea cinxia;Melitaea cinxia;1;Melitaea cinxia;0.999999999999318;  
MK186551;Lepidoptera;Melitaea deione;Melitaea deione;1;Melitaea deione;0.999999729994905;  
MK186552;Lepidoptera;Melitaea deione;Melitaea deione;1;Melitaea deione;0.999999743683593;  
MK186553;Lepidoptera;Melitaea diamina;Melitaea diamina;0.999999735688767;  
MK186554;Lepidoptera;Melitaea diamina;NA;0.177;Melitaea diamina;0.999999983670563;  
MK186555;Lepidoptera;Melitaea diamina;NA;0.055;Melitaea diamina;0.999999987179621;  
MK186556;Lepidoptera;Melitaea diamina;NA;0.128;Melitaea diamina;0.999999974054277;  
MK186557;Lepidoptera;Melitaea diamina;NA;0.157;Melitaea diamina;0.999999996161478;  
MK186558;Lepidoptera;Melitaea diamina;NA;0.157;Melitaea diamina;0.999999996161478;  
MK186559;Lepidoptera;Melitaea didyma;Melitaea didyma;NA;Melitaea didyma;0.971462863566472;  
MK186563;Lepidoptera;Melitaea nevadensis;NA;0.016;Melitaea nevadensis;0.895792250169311;  
MK186565;Lepidoptera;Melitaea nevadensis;NA;0.001;NA;0.999999999857824;  
MK186566;Lepidoptera;Melitaea nevadensis;NA;0.001;Melitaea nevadensis;0.749786150836048;  
MK186567;Lepidoptera;Melitaea nevadensis;NA;NA;Melitaea nevadensis;0.772110120397072;  
MK186568;Lepidoptera;Melitaea nevadensis;NA;0.001;NA;0.99999999912652;  
MK186569;Lepidoptera;Melitaea nevadensis;NA;0.01;Melitaea nevadensis;0.707519738957255;  
MK186570;Lepidoptera;Melitaea nevadensis;NA;0.001;NA;0.99999999953142;  
MK186571;Lepidoptera;Melitaea parthenoides;Melitaea parthenoides;1;Melitaea parthenoides;0.999999979372405;  
MK186572;Lepidoptera;Melitaea parthenoides;Melitaea parthenoides;1;Melitaea parthenoides;0.999999994653734;  
MK186573;Lepidoptera;Melitaea parthenoides;Melitaea parthenoides;1;Melitaea parthenoides;0.999999997226809;  
MK186578;Lepidoptera;Melitaea varia;Melitaea varia;1;Melitaea varia;0.999993530099357;  
MK186579;Lepidoptera;Melitaea varia;Melitaea varia;1;Melitaea varia;0.999989030408412;  
MK186580;Lepidoptera;Melitaea varia;Melitaea varia;1;Melitaea varia;0.999997643578913;  
MK186581;Lepidoptera;Minois dryas;NA;0.025;Minois dryas;0.868196387308076;  
MK186582;Lepidoptera;Minois dryas;NA;0.022;Minois dryas;0.871610991593088;  
MK186583;Lepidoptera;Minois dryas;NA;0.022;Minois dryas;0.871610991593088;  
MK186588;Lepidoptera;Nymphalis antiopa;NA;0.229;Nymphalis antiopa;0.999999949546323;  
MK186597;Lepidoptera;Ochlodes sylvanus;NA;0.335;Ochlodes sylvanus;0.995423959299584;  
MK186598;Lepidoptera;Ochlodes sylvanus;NA;0.304;Ochlodes sylvanus;0.995676248293362;  
MK186599;Lepidoptera;Ochlodes sylvanus;NA;NA;Ochlodes sylvanus;0.995530013971128;  
MK186600;Lepidoptera;Ochlodes sylvanus;NA;0.304;Ochlodes sylvanus;0.995676248293362;  
MK186601;Lepidoptera;Ochlodes sylvanus;NA;0.304;Ochlodes sylvanus;0.995676248293362;  
MK186602;Lepidoptera;Ochlodes sylvanus;NA;0.335;Ochlodes sylvanus;0.995423959299584;  
MK186603;Lepidoptera;Ochlodes sylvanus;NA;0.304;Ochlodes sylvanus;0.995676248293362;  
MK186604;Lepidoptera;Ochlodes sylvanus;NA;0.304;Ochlodes sylvanus;0.995676248293362;  
MK186605;Lepidoptera;Ochlodes sylvanus;NA;0.32;Ochlodes sylvanus;0.995541032441178;  
MK186607;Lepidoptera;Oeneis glacialis;Oeneis glacialis;NA;Oeneis glacialis;0.987143946313372;  
MK186608;Lepidoptera;Papilio machaon;Papilio machaon;NA;Papilio machaon;0.997096642066626;  
MK186611;Lepidoptera;Papilio machaon;Papilio machaon;0.003;Papilio machaon;0.993805994878478;  
MK186612;Lepidoptera;Pararge aegeria;Pararge aegeria;1;Pararge aegeria;0.99999999981921;  
MK186613;Lepidoptera;Pararge aegeria;Pararge aegeria;1;Pararge aegeria;0.99999999842714;  
MK186614;Lepidoptera;Pararge aegeria;Pararge aegeria;1;Pararge aegeria;0.999999999634298;  
MK186615;Lepidoptera;Pararge aegeria;Pararge aegeria;1;Pararge aegeria;0.999999999403428;  
MK186616;Lepidoptera;Pararge aegeria;Pararge aegeria;1;Pararge aegeria;0.99999999919766;  
MK186617;Lepidoptera;Pararge aegeria;Pararge aegeria;1;Pararge aegeria;0.99999999919766;  
MK186620;Lepidoptera;Parnassius mnemosyne;Parnassius mnemosyne;1;Parnassius mnemosyne;0.999999182879371;  
MK186621;Lepidoptera;Parnassius mnemosyne;Parnassius mnemosyne;1;Parnassius mnemosyne;0.999997237058446;  
MK186622;Lepidoptera;Parnassius mnemosyne;Parnassius mnemosyne;1;Parnassius mnemosyne;0.999999468357372;  
MK186623;Lepidoptera;Parnassius mnemosyne;Parnassius mnemosyne;1;Parnassius mnemosyne;0.999999182879371;  
MK186629;Lepidoptera;Phengaris arion;NA;NA;Phengaris arion;0.848593181149039;  
MK186630;Lepidoptera;Phengaris arion;NA;0.001;Phengaris arion;0.925858124607094;  
MK186631;Lepidoptera;Phengaris arion;NA;0.04;Phengaris arion;0.934893699328482;  
MK186632;Lepidoptera;Phengaris arion;NA;0.022;Phengaris arion;0.925772921223381;  
MK186633;Lepidoptera;Phengaris arion;NA;0.003;Phengaris arion;0.813559255239592;  
MK186634;Lepidoptera;Phengaris arion;NA;0.031;Phengaris arion;0.929945252366353;  
MK186655;Lepidoptera;Pieris napi;NA;0.08;Pieris napi;0.823311022092086;  
MK186656;Lepidoptera;Pieris napi;NA;0.008;Pieris napi;0.790825746989002;  
MK186657;Lepidoptera;Pieris napi;NA;0.008;Pieris napi;0.790825746989002;  
MK186660;Lepidoptera;Pieris napi;NA;NA;Pieris napi;0.881345985930259;  
MK186661;Lepidoptera;Pieris napi;NA;0.012;Pieris napi;0.830982203598986;  
MK186667;Lepidoptera;Plebejus argus;NA;0.04;Plebejus argus;0.988041859046217;  
MK186668;Lepidoptera;Plebejus argus;Plebejus argus;0.006;Plebejus argus;0.995231441851159;  
MK186669;Lepidoptera;Plebejus argus;NA;0.324;Plebejus argus;0.97124815046492;  
MK186670;Lepidoptera;Plebejus argus;Plebejus argus;0.018;Plebejus argus;0.983942157133061;  
MK186671;Lepidoptera;Plebejus argyrognomon;NA;0.001;NA;0.999931300450496;  
MK186672;Lepidoptera;Plebejus argyrognomon;NA;0.002;Plebejus argyrognomon;0.712868781924731;  
MK186673;Lepidoptera;Plebejus argyrognomon;NA;0.004;NA;0.999003523877672;  
MK186674;Lepidoptera;Plebejus idas;NA;0.001;NA;0.999417276617746;

MK186675;Lepidoptera;Plebejus idas;NA;0.001;NA;0.999540941919522;  
MK186676;Lepidoptera;Plebejus idas;NA;0.001;NA;0.999540941919522;  
MK186677;Lepidoptera;Plebejus idas;NA;0.004;NA;0.998898352664053;  
MK186678;Lepidoptera;Plebejus idas;NA;0.001;NA;0.999155883818852;  
MK186679;Lepidoptera;Plebejus idas;NA;0.001;NA;0.999540941919522;  
MK186680;Lepidoptera;Nymphalis c-album;NA;0.218;NA;0.999999260642547;  
MK186681;Lepidoptera;Nymphalis c-album;NA;0.077;NA;0.999999576214005;  
MK186682;Lepidoptera;Nymphalis c-album;NA;0.074;Polygonia c-album;0.729363089498517;  
MK186683;Lepidoptera;Nymphalis c-album;NA;0.218;NA;0.999999260642547;  
MK186684;Lepidoptera;Nymphalis c-album;NA;0.218;NA;0.999999260642547;  
MK186685;Lepidoptera;Polyommatus amandus;Polyommatus amandus;0.003;Polyommatus  
amandus;0.999987004283814;  
MK186686;Lepidoptera;Polyommatus amandus;Polyommatus amandus;0.004;Polyommatus  
amandus;0.999964874388038;  
MK186687;Lepidoptera;Polyommatus amandus;Polyommatus amandus;0.004;Polyommatus  
amandus;0.999979888960249;  
MK186688;Lepidoptera;Polyommatus damon;Polyommatus damon;1;Polyommatus damon;0.99999990253517;  
MK186689;Lepidoptera;Polyommatus damon;Polyommatus damon;1;Polyommatus damon;0.999999948683269;  
MK186690;Lepidoptera;Polyommatus damon;Polyommatus damon;1;Polyommatus damon;0.999999976959259;  
MK186691;Lepidoptera;Polyommatus daphnis;Polyommatus daphnis;1;Polyommatus  
daphnis;0.99987322383589;  
MK186692;Lepidoptera;Polyommatus daphnis;Polyommatus daphnis;1;Polyommatus  
daphnis;0.999883549769609;  
MK186693;Lepidoptera;Polyommatus dorylas;NA;0.001;Polyommatus dorylas;0.847406218697546;  
MK186694;Lepidoptera;Polyommatus dorylas;Polyommatus dorylas;0.009;Polyommatus  
dorylas;0.991722814510017;  
MK186695;Lepidoptera;Polyommatus dorylas;Polyommatus dorylas;1;Polyommatus  
dorylas;0.997621787619456;  
MK186696;Lepidoptera;Polyommatus eros;NA;0.001;Polyommatus eros;0.866010605610589;  
MK186697;Lepidoptera;Polyommatus eros;NA;0.001;Polyommatus eros;0.944687707185616;  
MK186698;Lepidoptera;Polyommatus eros;NA;0.001;Polyommatus eros;0.944687707185616;  
MK186699;Lepidoptera;Polyommatus escheri;Polyommatus escheri;1;Polyommatus  
escheri;0.99999993340788;  
MK186700;Lepidoptera;Polyommatus escheri;Polyommatus escheri;1;Polyommatus  
escheri;0.999999809757345;  
MK186701;Lepidoptera;Polyommatus icarus;NA;0.109;Polyommatus icarus;0.974236533175821;  
MK186701;Lepidoptera;Polyommatus icarus;NA;0.109;Polyommatus icarus;0.974236533175821;  
MK186702;Lepidoptera;Polyommatus icarus;NA;0.001;Polyommatus icarus;0.991536624780024;  
MK186702;Lepidoptera;Polyommatus icarus;NA;0.001;Polyommatus icarus;0.991536624780024;  
MK186703;Lepidoptera;Polyommatus icarus;NA;0.001;Polyommatus icarus;0.991536624780024;  
MK186703;Lepidoptera;Polyommatus icarus;NA;0.001;Polyommatus icarus;0.991536624780024;  
MK186704;Lepidoptera;Polyommatus icarus;NA;0.002;Polyommatus icarus;0.998263177861678;  
MK186704;Lepidoptera;Polyommatus icarus;NA;0.002;Polyommatus icarus;0.998263177861678;  
MK186705;Lepidoptera;Polyommatus icarus;NA;0.002;Polyommatus icarus;0.979420462678099;  
MK186705;Lepidoptera;Polyommatus icarus;NA;0.002;Polyommatus icarus;0.979420462678099;  
MK186706;Lepidoptera;Polyommatus icarus;Polyommatus icarus;0.002;Polyommatus  
icarus;0.974025664619468;  
MK186706;Lepidoptera;Polyommatus icarus;Polyommatus icarus;0.002;Polyommatus  
icarus;0.974025664619468;  
MK186712;Lepidoptera;Pontia callidice;Pontia callidice;1;Pontia callidice;0.9999999972826;  
MK186713;Lepidoptera;Pontia callidice;Pontia callidice;1;Pontia callidice;0.999999976267276;  
MK186720;Lepidoptera;Pyrgus alveus;NA;0.002;NA;0.99999999997773;  
MK186721;Lepidoptera;Pyrgus alveus;NA;0.002;NA;0.99999999997773;  
MK186722;Lepidoptera;Pyrgus alveus;NA;0.01;NA;0.99999999997905;  
MK186723;Lepidoptera;Pyrgus alveus;NA;NA;NA;0.999999999956;  
MK186724;Lepidoptera;Pyrgus andromedae;Pyrgus andromedae;0.001;Pyrgus  
andromedae;0.998616429582581;  
MK186725;Lepidoptera;Pyrgus andromedae;Pyrgus andromedae;1;Pyrgus andromedae;0.999453288342031;  
MK186726;Lepidoptera;Pyrgus andromedae;Pyrgus andromedae;0.001;Pyrgus  
andromedae;0.998616429582581;  
MK186727;Lepidoptera;Pyrgus andromedae;Pyrgus andromedae;0.001;Pyrgus  
andromedae;0.998616429582581;  
MK186728;Lepidoptera;Pyrgus armoricanus;Pyrgus armoricanus;1;Pyrgus  
armoricanus;0.999997212344957;  
MK186729;Lepidoptera;Pyrgus armoricanus;Pyrgus armoricanus;1;Pyrgus  
armoricanus;0.999995923887249;  
MK186730;Lepidoptera;Pyrgus armoricanus;Pyrgus armoricanus;1;Pyrgus  
armoricanus;0.999997571812165;  
MK186731;Lepidoptera;Pyrgus armoricanus;Pyrgus armoricanus;1;Pyrgus  
armoricanus;0.999996398214456;  
MK186732;Lepidoptera;Pyrgus armoricanus;Pyrgus armoricanus;1;Pyrgus  
armoricanus;0.999988520165187;  
MK186733;Lepidoptera;Pyrgus armoricanus;Pyrgus armoricanus;1;Pyrgus  
armoricanus;0.999997498890424;  
MK186734;Lepidoptera;Pyrgus armoricanus;Pyrgus armoricanus;1;Pyrgus  
armoricanus;0.999997212344957;  
MK186735;Lepidoptera;Pyrgus cacaliae;Pyrgus cacaliae;0.001;Pyrgus cacaliae;0.998315214300087;  
MK186736;Lepidoptera;Pyrgus cacaliae;Pyrgus cacaliae;0.001;Pyrgus cacaliae;0.998315214300087;

MK186737;Lepidoptera;Pyrgus cacaliae;Pyrgus cacaliae;0.001;Pyrgus cacaliae;0.998490079014641;  
 MK186738;Lepidoptera;Pyrgus cacaliae;Pyrgus cacaliae;0.999;Pyrgus cacaliae;0.994248709401488;  
 MK186739;Lepidoptera;Pyrgus carlinae;Pyrgus carlinae;NA;0.061;Pyrgus carlinae;0.853193970604539;  
 MK186740;Lepidoptera;Pyrgus carlinae;Pyrgus carlinae;NA;0.096;Pyrgus carlinae;0.7992289744845;  
 MK186741;Lepidoptera;Pyrgus carthami;Pyrgus carthami;1;Pyrgus carthami;0.999995673756424;  
 MK186742;Lepidoptera;Pyrgus carthami;Pyrgus carthami;1;Pyrgus carthami;0.999997648181059;  
 MK186743;Lepidoptera;Pyrgus carthami;Pyrgus carthami;1;Pyrgus carthami;0.999995673756424;  
 MK186744;Lepidoptera;Pyrgus malvae;Pyrgus malvae;NA;Pyrgus malvae;0.985537009228567;  
 MK186745;Lepidoptera;Pyrgus malvae;Pyrgus malvoide;0.843314900290182;  
 MK186746;Lepidoptera;Pyrgus malvae;Pyrgus malvoide;0.751261270197844;  
 MK186747;Lepidoptera;Pyrgus malvoide;NA;0.144;Pyrgus malvoide;0.922277091908561;  
 MK186748;Lepidoptera;Pyrgus malvoide;NA;0.144;Pyrgus malvoide;0.922277091908561;  
 MK186749;Lepidoptera;Pyrgus malvoide;NA;0.042;Pyrgus malvoide;0.872793748652385;  
 MK186750;Lepidoptera;Pyrgus malvoide;NA;0.097;Pyrgus malvoide;0.917770993608559;  
 MK186751;Lepidoptera;Pyrgus malvoide;NA;0.144;Pyrgus malvoide;0.922277091908561;  
 MK186752;Lepidoptera;Pyrgus onopordi;Pyrgus onopordi;1;Pyrgus onopordi;0.999989234814272;  
 MK186753;Lepidoptera;Pyrgus serratulae;Pyrgus serratulae;1;Pyrgus serratulae;0.99999629128025;  
 MK186754;Lepidoptera;Pyrgus serratulae;Pyrgus serratulae;1;Pyrgus serratulae;0.99999960093448;  
 MK186755;Lepidoptera;Pyrgus serratulae;Pyrgus serratulae;1;Pyrgus serratulae;0.9999991317404;  
 MK186756;Lepidoptera;Pyrgus serratulae;Pyrgus serratulae;1;Pyrgus serratulae;0.99999921710614;  
 MK186757;Lepidoptera;Pyrgus warrenensis;NA;0.001;Pyrgus warrenensis;0.794601956296812;  
 MK186758;Lepidoptera;Pyrgus warrenensis;NA;NA;0.99999999996119;  
 MK186759;Lepidoptera;Pyrgus warrenensis;NA;0.002;NA;0.9999999999773;  
 MK186760;Lepidoptera;Pyrgus warrenensis;NA;NA;0.99999999996255;  
 MK186761;Lepidoptera;Maniola tithonus;Pyronia tithonus;NA;Pyronia tithonus;1;  
 MK186762;Lepidoptera;Maniola tithonus;Pyronia tithonus;NA;Pyronia tithonus;0.99999999998636;  
 MK186763;Lepidoptera;Satyrium acaciae;Satyrium acaciae;1;Satyrium acaciae;0.99999920113882;  
 MK186764;Lepidoptera;Satyrium ilicis;Satyrium ilicis;1;Satyrium ilicis;0.99999934882398;  
 MK186765;Lepidoptera;Satyrium ilicis;Satyrium ilicis;1;Satyrium ilicis;0.99999994055429;  
 MK186766;Lepidoptera;Satyrium pruni;NA;0.085;Satyrium pruni;0.989461621719496;  
 MK186767;Lepidoptera;Satyrium pruni;NA;0.493;Satyrium pruni;0.984126704218791;  
 MK186768;Lepidoptera;Satyrium pruni;NA;0.481;Satyrium pruni;0.983627344641564;  
 MK186769;Lepidoptera;Satyrium spini;Satyrium spini;1;Satyrium spini;0.99999902782098;  
 MK186770;Lepidoptera;Satyrium spini;Satyrium spini;1;Satyrium spini;0.99999976789894;  
 MK186771;Lepidoptera;Satyrium spini;Satyrium spini;1;Satyrium spini;0.99999925519435;  
 MK186772;Lepidoptera;Satyrium w-album;NA;0.057;Satyrium w-album;0.988131882252173;  
 MK186773;Lepidoptera;Satyrium w-album;NA;0.082;Satyrium w-album;0.98891256429909;  
 MK186774;Lepidoptera;Satyrium w-album;NA;0.232;Satyrium w-album;0.91465176087597;  
 MK186775;Lepidoptera;Satyrium w-album;NA;0.082;Satyrium w-album;0.98891256429909;  
 MK186776;Lepidoptera;Satyrium w-album;NA;0.16;NA;0.999549535946431;  
 MK186777;Lepidoptera;Satyrus ferula;Satyrus ferula;0.001;Satyrus ferula;0.989556430852749;  
 MK186778;Lepidoptera;Satyrus ferula;Satyrus ferula;0.001;Satyrus ferula;0.99242731441577;  
 MK186779;Lepidoptera;Scolitantides orion;Scolitantides orion;1;Scolitantides orion;0.999999989494057;  
 MK186780;Lepidoptera;Argynnis aglaja;NA;0.016;Speyeria aglaja;0.817491043916765;  
 MK186781;Lepidoptera;Argynnis aglaja;NA;0.03;NA;0.764666601197647;  
 MK186782;Lepidoptera;Argynnis aglaja;NA;0.016;Speyeria aglaja;0.817491043916765;  
 MK186783;Lepidoptera;Argynnis aglaja;NA;0.002;NA;0.755559854096972;  
 MK186784;Lepidoptera;Argynnis aglaja;NA;0.016;Speyeria aglaja;0.817491043916765;  
 MK186785;Lepidoptera;Argynnis aglaja;NA;0.016;Speyeria aglaja;0.817491043916765;  
 MK186786;Lepidoptera;Argynnis aglaja;NA;NA;Speyeria aglaja;0.782380408332011;  
 MK186787;Lepidoptera;Thecla betulae;Thecla betulae;1;Thecla betulae;0.99999999973227;  
 MK186788;Lepidoptera;Thecla betulae;Thecla betulae;1;Thecla betulae;0.99999999972317;  
 MK186789;Lepidoptera;Thecla betulae;Thecla betulae;1;Thecla betulae;0.999999999798774;  
 MK186790;Lepidoptera;Thymelicus acteon;Thymelicus acteon;1;Thymelicus acteon;0.99999995291489;  
 MK186791;Lepidoptera;Thymelicus acteon;Thymelicus acteon;1;Thymelicus acteon;0.99999999104989;  
 MK186792;Lepidoptera;Thymelicus lineola;Thymelicus lineola;1;Thymelicus lineola;0.999993424589821;  
 MK186793;Lepidoptera;Thymelicus lineola;Thymelicus lineola;1;Thymelicus lineola;0.999975403660303;  
 MK186794;Lepidoptera;Thymelicus lineola;Thymelicus lineola;1;Thymelicus lineola;0.999993288936091;  
 MK186795;Lepidoptera;Thymelicus lineola;Thymelicus lineola;1;Thymelicus lineola;0.99994236469757;  
 MK186796;Lepidoptera;Thymelicus lineola;Thymelicus lineola;1;Thymelicus lineola;0.99997267117451;  
 MK186797;Lepidoptera;Thymelicus lineola;Thymelicus lineola;1;Thymelicus lineola;0.99985481636036;  
 MK186798;Lepidoptera;Thymelicus lineola;Thymelicus lineola;1;Thymelicus lineola;0.999974214484897;  
 MK186799;Lepidoptera;Thymelicus sylvestris;NA;0.335;Thymelicus sylvestris;0.999940092520524;  
 MK186800;Lepidoptera;Thymelicus sylvestris;NA;0.335;Thymelicus sylvestris;0.999940092520524;  
 MK186801;Lepidoptera;Thymelicus sylvestris;Thymelicus sylvestris;1;Thymelicus sylvestris;0.999999982378;  
 MK186802;Lepidoptera;Thymelicus sylvestris;NA;0.304;Thymelicus sylvestris;0.999880347008416;  
 MK186803;Lepidoptera;Thymelicus sylvestris;NA;0.335;Thymelicus sylvestris;0.999940092520524;  
 MK186804;Lepidoptera;Thymelicus sylvestris;Thymelicus sylvestris;1;Thymelicus sylvestris;0.999997781726409;

MK186810;Lepidoptera;Thymelicus sylvestris;Thymelicus sylvestris;1;Thymelicus sylvestris;0.99999985093609;  
MK186811;Lepidoptera;Vanessa atalanta;Vanessa atalanta;1;Vanessa atalanta;0.99999999688242;  
MK186812;Lepidoptera;Vanessa atalanta;Vanessa atalanta;1;Vanessa atalanta;0.99999999653568;  
MK186813;Lepidoptera;Vanessa atalanta;Vanessa atalanta;1;Vanessa atalanta;0.99999999750116;  
MK186814;Lepidoptera;Vanessa atalanta;Vanessa atalanta;1;Vanessa atalanta;0.999999997508098;  
MK252946;Lepidoptera;Boloria selene;NA;0.115;Boloria selene;0.999999952525941;  
MK252947;Lepidoptera;Boloria selene;NA;0.115;Boloria selene;0.999999952525941;  
MK252948;Lepidoptera;Boloria selene;NA;0.06;Boloria selene;0.999999789050855;  
MK252949;Lepidoptera;Boloria selene;NA;0.053;Boloria selene;0.99999995281456;  
MK252950;Lepidoptera;Boloria selene;NA;0.115;Boloria selene;0.999999952525941;  
MK252951;Lepidoptera;Boloria selene;NA;0.335;Boloria selene;0.999999975285192;  
MK252953;Lepidoptera;Boloria selene;NA;0.103;Boloria selene;0.999999940815089;  
MK252954;Lepidoptera;Boloria selene;NA;0.335;Boloria selene;0.999999975285192;  
MK252955;Lepidoptera;Boloria selene;NA;0.14;Boloria selene;0.99999985987302;  
MK252956;Lepidoptera;Boloria selene;NA;0.14;Boloria selene;0.99999985987302;  
MK252957;Lepidoptera;Boloria selene;NA;0.335;Boloria selene;0.999999975285192;  
MK252958;Lepidoptera;Boloria selene;NA;0.166;Boloria selene;0.999999961382259;  
MK343429;Lepidoptera;Satyrium pruni;0.347;Satyrium pruni;0.991870503237268;  
MK455752;Lepidoptera;Agriades orbitulus;NA;0.013;Agriades orbitulus;0.998361127658296;  
MK455753;Lepidoptera;Agriades orbitulus;NA;0.002;Agriades orbitulus;0.991706133880976;  
MK587253;Lepidoptera;Iphiclides podalirius;NA;0.302;Iphiclides podalirius;0.931082412606632;  
MK587254;Lepidoptera;Iphiclides podalirius;NA;0.121;Iphiclides podalirius;0.948523477961333;  
MK587255;Lepidoptera;Iphiclides podalirius;NA;0.302;Iphiclides podalirius;0.931082412606632;  
MK587256;Lepidoptera;Iphiclides podalirius;NA;0.302;Iphiclides podalirius;0.931082412606632;  
MK587260;Lepidoptera;Iphiclides podalirius;NA;0.302;Iphiclides podalirius;0.931082412606632;  
MK587261;Lepidoptera;Iphiclides podalirius;NA;0.114;Iphiclides podalirius;0.964718668048293;  
MK587263;Lepidoptera;Iphiclides podalirius;NA;NA;Iphiclides podalirius;0.943913710269127;  
MK587265;Lepidoptera;Iphiclides podalirius;NA;0.136;Iphiclides podalirius;0.967608413237976;  
MK587266;Lepidoptera;Iphiclides podalirius;NA;0.302;Iphiclides podalirius;0.931082412606632;  
MK587267;Lepidoptera;Iphiclides podalirius;NA;0.302;Iphiclides podalirius;0.931082412606632;  
MK587268;Lepidoptera;Iphiclides podalirius;NA;0.302;Iphiclides podalirius;0.931082412606632;  
MK587269;Lepidoptera;Iphiclides podalirius;NA;0.302;Iphiclides podalirius;0.931082412606632;  
MK587270;Lepidoptera;Iphiclides podalirius;NA;0.302;Iphiclides podalirius;0.931082412606632;  
MK587271;Lepidoptera;Iphiclides podalirius;NA;0.302;Iphiclides podalirius;0.931082412606632;  
MK587272;Lepidoptera;Iphiclides podalirius;NA;0.302;Iphiclides podalirius;0.931082412606632;  
MK812923;Lepidoptera;Thymelicus sylvestris;NA;0.132;Thymelicus sylvestris;0.999929534827865;  
MK812924;Lepidoptera;Thymelicus sylvestris;Thymelicus sylvestris;1;Thymelicus sylvestris;0.999999981568351;  
MK812925;Lepidoptera;Thymelicus sylvestris;NA;0.131;Thymelicus sylvestris;0.999961574491035;  
MK812926;Lepidoptera;Thymelicus sylvestris;NA;0.324;Thymelicus sylvestris;0.999940778442454;  
MK812927;Lepidoptera;Thymelicus sylvestris;Thymelicus sylvestris;1;Thymelicus sylvestris;0.999999981568351;  
MK812928;Lepidoptera;Thymelicus sylvestris;NA;0.131;Thymelicus sylvestris;0.999961574491035;  
MK812929;Lepidoptera;Thymelicus sylvestris;NA;0.324;Thymelicus sylvestris;0.999940778442454;  
MK812931;Lepidoptera;Thymelicus sylvestris;NA;0.324;Thymelicus sylvestris;0.999940778442454;  
MK812932;Lepidoptera;Thymelicus sylvestris;Thymelicus sylvestris;1;Thymelicus sylvestris;0.999993577919115;  
MK812933;Lepidoptera;Thymelicus sylvestris;NA;0.131;Thymelicus sylvestris;0.999961574491035;  
MK812934;Lepidoptera;Thymelicus lineola;Thymelicus lineola;1;Thymelicus lineola;0.999997156464765;  
MK812935;Lepidoptera;Thymelicus sylvestris;NA;0.324;Thymelicus sylvestris;0.999940778442454;  
MK812936;Lepidoptera;Thymelicus sylvestris;NA;0.324;Thymelicus sylvestris;0.999940778442454;  
MK812937;Lepidoptera;Thymelicus sylvestris;Thymelicus sylvestris;1;Thymelicus sylvestris;0.999999985935205;  
MK812938;Lepidoptera;Thymelicus sylvestris;NA;0.324;Thymelicus sylvestris;0.999940778442454;  
MK812939;Lepidoptera;Thymelicus sylvestris;NA;0.14;Thymelicus sylvestris;0.999963443881537;  
MK812940;Lepidoptera;Thymelicus sylvestris;Thymelicus sylvestris;1;Thymelicus sylvestris;0.99999876153052;  
MK812941;Lepidoptera;Thymelicus sylvestris;Thymelicus sylvestris;1;Thymelicus sylvestris;0.999999981568351;  
MK812942;Lepidoptera;Thymelicus sylvestris;NA;0.324;Thymelicus sylvestris;0.999940778442454;  
MK812943;Lepidoptera;Thymelicus sylvestris;Thymelicus sylvestris;1;Thymelicus sylvestris;0.999999985935205;  
MK812944;Lepidoptera;Thymelicus sylvestris;Thymelicus sylvestris;1;Thymelicus sylvestris;0.99999876153052;  
MK812945;Lepidoptera;Thymelicus sylvestris;Thymelicus sylvestris;1;Thymelicus sylvestris;0.999999985935205;  
MK812946;Lepidoptera;Thymelicus sylvestris;Thymelicus sylvestris;1;Thymelicus sylvestris;0.999999985935205;  
MK812948;Lepidoptera;Thymelicus sylvestris;NA;0.324;Thymelicus sylvestris;0.999940778442454;  
MK812949;Lepidoptera;Thymelicus sylvestris;Thymelicus sylvestris;1;Thymelicus sylvestris;0.999999979197469;  
MK812950;Lepidoptera;Thymelicus sylvestris;NA;0.324;Thymelicus sylvestris;0.999940778442454;  
MK812951;Lepidoptera;Thymelicus sylvestris;NA;0.324;Thymelicus sylvestris;0.999940778442454;  
MK812952;Lepidoptera;Thymelicus acteon;Thymelicus acteon;1;Thymelicus acteon;0.99999999752248;  
MK812953;Lepidoptera;Thymelicus sylvestris;Thymelicus sylvestris;1;Thymelicus sylvestris;0.999999990634535;



MK812954;Lepidoptera;Thymelicus sylvestris;NA;0.131;Thymelicus sylvestris;0.999961574491035;  
MK812955;Lepidoptera;Thymelicus sylvestris;NA;0.004;Thymelicus sylvestris;0.998308003514278;  
MK812956;Lepidoptera;Thymelicus sylvestris;NA;0.004;Thymelicus sylvestris;0.998308003514278;  
MK812958;Lepidoptera;Thymelicus sylvestris;Thymelicus sylvestris;1;Thymelicus  
sylvestris;0.99999981568351;  
MK812959;Lepidoptera;Thymelicus sylvestris;Thymelicus sylvestris;1;Thymelicus  
sylvestris;0.99999981568351;  
MK812960;Lepidoptera;Thymelicus sylvestris;NA;0.324;Thymelicus sylvestris;0.999940778442454;  
MK812961;Lepidoptera;Thymelicus lineola;Thymelicus lineola;1;Thymelicus  
lineola;0.999971535093703;  
MK812962;Lepidoptera;Thymelicus sylvestris;NA;0.004;Thymelicus sylvestris;0.998308003514278;  
MK812963;Lepidoptera;Thymelicus sylvestris;Thymelicus sylvestris;1;Thymelicus  
sylvestris;0.99999981568351;  
MK812964;Lepidoptera;Thymelicus sylvestris;Thymelicus sylvestris;1;Thymelicus  
sylvestris;0.99998807745442;  
MK812965;Lepidoptera;Thymelicus sylvestris;NA;0.324;Thymelicus sylvestris;0.999940778442454;  
MK812966;Lepidoptera;Thymelicus sylvestris;Thymelicus sylvestris;1;Thymelicus  
sylvestris;0.99999985935205;  
MK812967;Lepidoptera;Thymelicus sylvestris;NA;0.324;Thymelicus sylvestris;0.999940778442454;  
MK924101;Lepidoptera;Aporia crataegi;NA;NA;Aporia crataegi;0.999996781126733;  
MK924102;Lepidoptera;Aporia crataegi;NA;NA;Aporia crataegi;0.999996781126733;  
MK924103;Lepidoptera;Aporia crataegi;NA;NA;Aporia crataegi;0.999996781126733;  
MK924104;Lepidoptera;Aporia crataegi;NA;NA;Aporia crataegi;0.999996781126733;  
MK924105;Lepidoptera;Aporia crataegi;NA;NA;Aporia crataegi;0.999997351946131;  
MK924106;Lepidoptera;Aporia crataegi;NA;NA;Aporia crataegi;0.999996781126733;  
MK924107;Lepidoptera;Aporia crataegi;NA;NA;Aporia crataegi;0.999996781126733;  
MK924108;Lepidoptera;Aporia crataegi;NA;NA;Aporia crataegi;0.999998459680561;  
MK924109;Lepidoptera;Aporia crataegi;NA;NA;Aporia crataegi;0.999996781126733;  
MK924110;Lepidoptera;Aporia crataegi;NA;NA;Aporia crataegi;0.999996781126733;  
MK924111;Lepidoptera;Aporia crataegi;NA;NA;Aporia crataegi;0.999996781126733;  
MK924112;Lepidoptera;Aporia crataegi;NA;NA;Aporia crataegi;0.999998459680561;  
MK924113;Lepidoptera;Aporia crataegi;NA;NA;Aporia crataegi;0.999996781126733;  
MK924114;Lepidoptera;Aporia crataegi;NA;NA;Aporia crataegi;0.999996781126733;  
MK924115;Lepidoptera;Aporia crataegi;NA;NA;Aporia crataegi;0.999997351946131;  
MK924116;Lepidoptera;Aporia crataegi;NA;NA;Aporia crataegi;0.999996781126733;  
MK924117;Lepidoptera;Aporia crataegi;NA;NA;Aporia crataegi;0.999996781126733;  
MK924118;Lepidoptera;Aporia crataegi;NA;NA;Aporia crataegi;0.999996781126733;  
MK924119;Lepidoptera;Aporia crataegi;NA;NA;Aporia crataegi;0.999996781126733;  
MK924120;Lepidoptera;Aporia crataegi;NA;NA;Aporia crataegi;0.999996781126733;  
MN107384;Lepidoptera;Aricia agestis;Aricia agestis;0.001;Aricia agestis;0.93433387200336;  
MN107385;Lepidoptera;Aricia agestis;Aricia agestis;0.001;Aricia agestis;0.983169453027443;  
MN107386;Lepidoptera;Aricia agestis;NA;NA;Aricia agestis;0.995003792644976;  
MN107387;Lepidoptera;Aricia agestis;Aricia agestis;0.02;Aricia agestis;0.997360197036774;  
MN107388;Lepidoptera;Aricia agestis;NA;0.026;Aricia agestis;0.998730844602412;  
MN107389;Lepidoptera;Aricia agestis;NA;NA;Aricia agestis;0.997354154853625;  
MN107390;Lepidoptera;Aricia agestis;NA;0.001;Aricia agestis;0.944618390939925;  
MN107391;Lepidoptera;Aricia agestis;NA;0.001;Aricia agestis;0.987521320091523;  
MN107392;Lepidoptera;Aricia agestis;NA;NA;Aricia agestis;0.997764569470653;  
MN107393;Lepidoptera;Aricia agestis;NA;0.231;Aricia agestis;0.987554269931849;  
MN107394;Lepidoptera;Aricia agestis;NA;0.231;Aricia agestis;0.987554269931849;  
MN107395;Lepidoptera;Aricia agestis;NA;0.231;Aricia agestis;0.987554269931849;  
MN107396;Lepidoptera;Aricia agestis;NA;0.001;Aricia agestis;0.908942032144794;  
MN107397;Lepidoptera;Aricia agestis;NA;NA;Aricia agestis;0.995795194058403;  
MN107398;Lepidoptera;Aricia artaxerxes;Plebejus argus;1;Aricia artaxerxes;0.99967524337741;  
MN107399;Lepidoptera;Aricia artaxerxes;Plebejus argus;1;Aricia artaxerxes;0.999598132990806;  
MN107400;Lepidoptera;Aricia artaxerxes;Plebejus argus;1;Aricia artaxerxes;0.999619916208509;  
MN107401;Lepidoptera;Aricia artaxerxes;Plebejus argus;1;Aricia artaxerxes;0.999598132990806;  
MN107402;Lepidoptera;Aricia artaxerxes;Plebejus argus;1;Aricia artaxerxes;0.999639973715367;  
MN107403;Lepidoptera;Aricia artaxerxes;Plebejus argus;0.001;Aricia artaxerxes;0.999718461525682;  
MN107404;Lepidoptera;Aricia artaxerxes;Plebejus argus;1;Aricia artaxerxes;0.99976599124702;  
MN107405;Lepidoptera;Aricia artaxerxes;Plebejus argus;1;Aricia artaxerxes;0.99976599124702;  
MN107406;Lepidoptera;Aricia artaxerxes;Plebejus argus;1;Aricia artaxerxes;0.99976599124702;  
MN107407;Lepidoptera;Aricia artaxerxes;Plebejus argus;1;Aricia artaxerxes;0.99976599124702;  
MN107408;Lepidoptera;Aricia artaxerxes;Plebejus argus;1;Aricia artaxerxes;0.99976599124702;  
MN107409;Lepidoptera;Aricia artaxerxes;Plebejus argus;1;Aricia artaxerxes;0.99976599124702;  
MN138462;Lepidoptera;Thymelicus sylvestris;NA;0.324;Thymelicus sylvestris;0.999940778442454;  
MN138463;Lepidoptera;Pyrgus carthami;Pyrgus carthami;1;Pyrgus carthami;0.999996750848985;  
MN138464;Lepidoptera;Polyommatus icarus;Polyommatus icarus;0.002;Polyommatus  
icarus;0.999574015662565;  
MN138465;Lepidoptera;Polyommatus icarus;Polyommatus icarus;0.002;Polyommatus  
icarus;0.999716017140251;  
MN138466;Lepidoptera;Aricia agestis;NA;0.067;Aricia agestis;0.999509743227786;  
MN138468;Lepidoptera;Pieris napi;NA;0.011;Pieris napi;0.801985394724814;  
MN138469;Lepidoptera;Hamearis lucina;NA;NA;Hamearis lucina;0.99999999984141;  
MN138470;Lepidoptera;Issoria lathonia;Issoria lathonia;1;Issoria lathonia;0.99999999989257;  
MN138471;Lepidoptera;Gegenes pumilio;Gegenes pumilio;1;Gegenes pumilio;0.999986726679266;  
MN138472;Lepidoptera;Pieris rapae;NA;NA;Pieris rapae;0.999985659117927;  
MN138473;Lepidoptera;Plebejus idas;NA;0.001;NA;0.998518811781132;

MN138474;Lepidoptera;Vanessa cardui;Vanessa cardui;1;Vanessa cardui;0.999999459983318;  
MN138476;Lepidoptera;Aricia cramera;Aricia cramera;1;Aricia cramera;0.999993731037033;  
MN138477;Lepidoptera;Pyrgus onopordi;Pyrgus onopordi;1;Pyrgus onopordi;0.999997111229755;  
MN138478;Lepidoptera;Boloria selene;NA;0.104;Boloria selene;0.99999788844655;  
MN138480;Lepidoptera;Cupido minimus;NA;0.001;Cupido minimus;0.999420080317202;  
MN138481;Lepidoptera;Satyrium spini;Satyrium spini;1;Satyrium spini;0.99999835426407;  
MN138482;Lepidoptera;Erynnis tages;Erynnis tages;1;Erynnis tages;0.99999281987018;  
MN138483;Lepidoptera;Aricia cramera;Aricia cramera;1;Aricia cramera;0.999993731037033;  
MN138485;Lepidoptera;Cupido minimus;NA;0.006;Cupido minimus;0.999768371759258;  
MN138487;Lepidoptera;Erynnis tages;Erynnis tages;1;Erynnis tages;0.99999281987018;  
MN138488;Lepidoptera;Hipparchia hermione;Hipparchia hermione;1;Hipparchia  
hermione;0.999892638915927;  
MN138489;Lepidoptera;Celastrina argiolus;Celastrina argiolus;1;Celastrina  
argiolus;0.999527385150531;  
MN138490;Lepidoptera;Cupido minimus;NA;0.004;Cupido minimus;0.99987402211542;  
MN138492;Lepidoptera;Melitaea varia;Melitaea varia;1;Melitaea varia;0.99996867427246;  
MN138494;Lepidoptera;Vanessa cardui;Vanessa cardui;1;Vanessa cardui;0.99999459983318;  
MN138495;Lepidoptera;Gonepteryx rhamni;Gonepteryx rhamni;1;Gonepteryx rhamni;0.999850170258883;  
MN138496;Lepidoptera;Fabriciana adippe;NA;NA;Fabriciana adippe;0.900255826442102;  
MN138497;Lepidoptera;Hipparchia fidia;Hipparchia fidia;1;Hipparchia fidia;1;  
MN138500;Lepidoptera;Lysandra coridon;NA;NA;NA;0.993087957572662;  
MN138501;Lepidoptera;Anthocharis cardamines;Anthocharis cardamines;1;Anthocharis  
cardamines;0.99999984875757;  
MN138502;Lepidoptera;Aricia eumedon;Eumedonia eumedon;0.004;Eumedonia eumedon;0.995707742228806;  
MN138503;Lepidoptera;Pieris rapae;NA;NA;Pieris rapae;0.99992588119495;  
MN138504;Lepidoptera;Parnassius apollo;Parnassius apollo;1;Parnassius apollo;0.992704703916692;  
MN138507;Lepidoptera;Polyommatus damon;Polyommatus damon;1;Polyommatus damon;0.99999867736202;  
MN138508;Lepidoptera;Erebia stiria;NA;NA;Erebia styx;0.890739244956497;  
MN138509;Lepidoptera;Polyommatus eros;NA;0.001;Polyommatus eros;0.974879223675754;  
MN138511;Lepidoptera;Coenonympha gardetta;NA;0.001;Coenonympha gardetta;0.741030700939901;  
MN138513;Lepidoptera;Limenitis camilla;Limenitis camilla;0.009;Limenitis  
camilla;0.9999828626808;  
MN138514;Lepidoptera;Erebia cassioides;NA;NA;NA;0.99999999999977;  
MN138515;Lepidoptera;Cupido minimus;NA;0.001;Cupido minimus;0.999803920701362;  
MN138516;Lepidoptera;Thymelicus lineola;Thymelicus lineola;1;Thymelicus  
lineola;0.999995927238524;  
MN138518;Lepidoptera;Nymphalis c-album;NA;0.215;NA;0.999999192918557;  
MN138519;Lepidoptera;Aporia crataegi;Aporia crataegi;0.001;Aporia crataegi;0.999999184111451;  
MN138520;Lepidoptera;Ochlodes sylvanus;NA;0.316;Ochlodes sylvanus;0.996318754838625;  
MN138521;Lepidoptera;Coenonympha pamphilus;Coenonympha pamphilus;1;Coenonympha  
pamphilus;0.99999999999744;  
MN138523;Lepidoptera;Pieris rapae;NA;NA;Pieris rapae;0.999984333973504;  
MN138524;Lepidoptera;Nymphalis c-album;NA;0.215;NA;0.999999192918557;  
MN138527;Lepidoptera;Erebia euryale;NA;NA;Erebia euryale;0.919518760623792;  
MN138529;Lepidoptera;Thymelicus lineola;Thymelicus lineola;1;Thymelicus  
lineola;0.999975349725498;  
MN138530;Lepidoptera;Satyrus ferula;Satyrus ferula;0.001;Satyrus ferula;0.992107254386621;  
MN138531;Lepidoptera;Maniola jurtina;NA;0.001;Maniola jurtina;0.939220105860875;  
MN138532;Lepidoptera;Aricia cramera;Aricia cramera;1;Aricia cramera;0.999993731037033;  
MN138534;Lepidoptera;Maniola jurtina;NA;0.001;Maniola jurtina;0.939220105860875;  
MN138535;Lepidoptera;Pieris rapae;Pieris rapae;1;Pieris rapae;0.999994083514588;  
MN138536;Lepidoptera;Polyommatus daphnis;Polyommatus daphnis;1;Polyommatus  
daphnis;0.99989331516623;  
MN138537;Lepidoptera;Aporia crataegi;NA;NA;Aporia crataegi;0.999998459680561;  
MN138538;Lepidoptera;Issoria lathonia;Issoria lathonia;1;Issoria lathonia;0.99999999989257;  
MN138540;Lepidoptera;Erebia montana;Erebia montana;1;Erebia montana;0.999686952031256;  
MN138543;Lepidoptera;Colias crocea;NA;0.059;NA;0.99999999999738;  
MN138544;Lepidoptera;Polyommatus dorylas;Polyommatus dorylas;0.008;Polyommatus  
dorylas;0.991281865899703;  
MN138545;Lepidoptera;Aricia eumedon;Eumedonia eumedon;0.001;Eumedonia eumedon;0.998061393042216;  
MN138546;Lepidoptera;Melitaea didyma;Melitaea didyma;0.999;Melitaea didyma;0.975495284820171;  
MN138547;Lepidoptera;Maniola cecilia;Pyronia cecilia;NA;Pyronia cecilia;1;  
MN138548;Lepidoptera;Coenonympha pamphilus;Coenonympha pamphilus;1;Coenonympha  
pamphilus;0.999999999999886;  
MN138549;Lepidoptera;Arethusana arethusa;NA;0.062;Arethusana arethusa;0.999962489703143;  
MN138551;Lepidoptera;Colias phicomone;NA;0.001;Colias phicomone;0.985598879697681;  
MN138553;Lepidoptera;Pieris rapae;NA;NA;Pieris rapae;0.99992588119495;  
MN138554;Lepidoptera;Pieris rapae;NA;NA;Pieris rapae;0.99992588119495;  
MN138555;Lepidoptera;Polyommatus icarus;NA;0.166;Polyommatus icarus;0.749935576218847;  
MN138555;Lepidoptera;Polyommatus icarus;NA;0.166;Polyommatus icarus;0.749935576218847;  
MN138557;Lepidoptera;Lampides boeticus;Lampides boeticus;1;Lampides boeticus;0.99999998781163;  
MN138558;Lepidoptera;Celastrina argiolus;Celastrina argiolus;1;Celastrina  
argiolus;0.999527385150531;  
MN138559;Lepidoptera;Pieris rapae;NA;0.175;Pieris rapae;0.99996637543374;  
MN138560;Lepidoptera;Coenonympha oedippus;Coenonympha oedippus;1;Coenonympha  
oedippus;0.999999999999801;  
MN138561;Lepidoptera;Vanessa atalanta;Vanessa atalanta;1;Vanessa atalanta;0.999999999757762;  
MN138562;Lepidoptera;Favonius quercus;NA;NA;Favonius quercus;0.73046069582187;

MN138563;Lepidoptera;Agriades optilete;Agriades optilete;1;Agriades optilete;0.9999999864568;  
MN138564;Lepidoptera;Lycaena virgaureae;NA;0.179;Lycaena virgaureae;0.999538199124597;  
MN138565;Lepidoptera;Polyommatus amandus;Polyommatus amandus;0.002;Polyommatus  
amandus;0.99998879592523;  
MN138567;Lepidoptera;Pieris rapae;NA;NA;Pieris rapae;0.999984333973504;  
MN138568;Lepidoptera;Thymelicus lineola;Thymelicus lineola;1;Thymelicus  
lineola;0.999999301001071;  
MN138569;Lepidoptera;Melanargia galathea;Melanargia galathea;NA;Melanargia  
galathea;0.987293011345651;  
MN138570;Lepidoptera;Melitaea didyma;NA;NA;Melitaea didyma;0.96852168594018;  
MN138571;Lepidoptera;Thymelicus sylvestris;Thymelicus sylvestris;1;Thymelicus  
sylvestris;0.99999981568351;  
MN138572;Lepidoptera;Melitaea cinxia;Melitaea cinxia;1;Melitaea cinxia;0.99999999999631;  
MN138573;Lepidoptera;Pieris rapae;NA;0.039;Pieris rapae;0.999989302159245;  
MN138574;Lepidoptera;Nymphalis c-album;NA;0.215;NA;0.999999192918557;  
MN138575;Lepidoptera;Lycaena virgaureae;NA;0.186;Lycaena virgaureae;0.999491227342155;  
MN138576;Lepidoptera;Melitaea didyma;Melitaea didyma;1;Melitaea didyma;0.999953644765793;  
MN138577;Lepidoptera;Melitaea varia;Melitaea varia;1;Melitaea varia;0.99999954770546;  
MN138578;Lepidoptera;Anthocharis cardamines;Anthocharis cardamines;1;Anthocharis  
cardamines;0.99999990347561;  
MN138579;Lepidoptera;Aricia eumedon;Eumedonia eumedon;0.001;Eumedonia eumedon;0.997362661323557;  
MN138581;Lepidoptera;Anthocharis euphenoides;NA;0.172;Anthocharis euphenoides;0.943741664916385;  
MN138582;Lepidoptera;Erebia meolans;Erebia meolans;1;Erebia meolans;0.999231432693854;  
MN138583;Lepidoptera;Lycaena tityrus;Lycaena tityrus;1;Lycaena tityrus;0.99998928238034;  
MN138585;Lepidoptera;Gonepteryx cleopatra;Gonepteryx cleopatra;0.998;Gonepteryx  
cleopatra;0.999118636582266;  
MN138586;Lepidoptera;Lycaena virgaureae;NA;0.178;Lycaena virgaureae;0.999268521681078;  
MN138587;Lepidoptera;Celastrina argiolus;Celastrina argiolus;1;Celastrina  
argiolus;0.999527385150531;  
MN138588;Lepidoptera;Pyrgus malvae;Pyrgus malvae;NA;Pyrgus malvae;0.980121140374433;  
MN138589;Lepidoptera;Lycaena phlaeas;Lycaena phlaeas;1;Lycaena phlaeas;0.99999996363186;  
MN138590;Lepidoptera;Fabriciana niobe;NA;0.005;Fabriciana niobe;0.992125835358755;  
MN138591;Lepidoptera;Maniola cecilia;Pyronia cecilia;1;Pyronia cecilia;1;  
MN138593;Lepidoptera;Pieris rapae;NA;0.075;Pieris rapae;0.999920903481213;  
MN138594;Lepidoptera;Polyommatus daphnis;Polyommatus daphnis;1;Polyommatus  
daphnis;0.999921258190997;  
MN138595;Lepidoptera;Pieris napi;NA;0.011;Pieris napi;0.801985394724814;  
MN138596;Lepidoptera;Thymelicus lineola;Thymelicus lineola;1;Thymelicus  
lineola;0.999995927238524;  
MN138597;Lepidoptera;Cupido osiris;Cupido osiris;1;Cupido osiris;0.999999409588131;  
MN138598;Lepidoptera;Thymelicus sylvestris;NA;0.324;Thymelicus sylvestris;0.999940778442454;  
MN138599;Lepidoptera;Melitaea varia;Melitaea varia;1;Melitaea varia;0.999996867427246;  
MN138601;Lepidoptera;Gegenes nostrodamus;Gegenes nostrodamus;1;Gegenes  
nostrodamus;0.999999996883645;  
MN138602;Lepidoptera;Coenonympha corinna;Coenonympha corinna;1;Coenonympha  
corinna;0.99999999984936;  
MN138603;Lepidoptera;Fabriciana niobe;NA;0.005;Fabriciana niobe;0.992125835358755;  
MN138604;Lepidoptera;Thymelicus acteon;Thymelicus acteon;1;Thymelicus acteon;0.9999999752248;  
MN138606;Lepidoptera;Coenonympha oedippus;Coenonympha oedippus;1;Coenonympha  
oedippus;0.99999999999432;  
MN138607;Lepidoptera;Plebejus argus;NA;0.133;Plebejus argus;0.983021740279961;  
MN138608;Lepidoptera;Cupido argiades;NA;0.499;NA;0.99999999984682;  
MN138609;Lepidoptera;Cupido minimus;NA;0.009;Cupido minimus;0.999791453712643;  
MN138610;Lepidoptera;Pyrgus malvoides;NA;0.176;Pyrgus malvoides;0.940490890379026;  
MN138611;Lepidoptera;Erebia medusa;NA;0.009;Erebia medusa;0.986275612856827;  
MN138613;Lepidoptera;Lycaena tityrus;Lycaena tityrus;1;Lycaena tityrus;0.999998928238034;  
MN138614;Lepidoptera;Cupido alcetas;NA;0.218;Cupido alcetas;0.833501983138177;  
MN138616;Lepidoptera;Plebejus idas;NA;0.007;NA;0.999546324331549;  
MN138617;Lepidoptera;Vanessa atalanta;Vanessa atalanta;1;Vanessa atalanta;0.99999999757762;  
MN138618;Lepidoptera;Lycaena alciphron;Lycaena alciphron;1;Lycaena alciphron;0.99999925232376;  
MN138621;Lepidoptera;Lycaena tityrus;Lycaena tityrus;1;Lycaena tityrus;0.999998928238034;  
MN138623;Lepidoptera;Erebia pharte;Erebia pharte;1;Erebia pharte;0.9999999630495;  
MN138625;Lepidoptera;Boloria euphrosyne;Boloria euphrosyne;0.003;Boloria  
euphrosyne;0.999970094877776;  
MN138626;Lepidoptera;Pieris napi;NA;0.004;Pieris napi;0.875055491166831;  
MN138627;Lepidoptera;Thymelicus acteon;Thymelicus acteon;1;Thymelicus acteon;0.9999999752248;  
MN138628;Lepidoptera;Erebia euryale;NA;NA;Erebia euryale;0.915139912216032;  
MN138629;Lepidoptera;Melitaea varia;Melitaea varia;1;Melitaea varia;0.999996867427246;  
MN138630;Lepidoptera;Maniola jurtina;NA;0.012;Maniola jurtina;0.852326677366872;  
MN138631;Lepidoptera;Aricia nicias;Aricia nicias;1;Aricia nicias;0.999956923176291;  
MN138632;Lepidoptera;Erebia euryale;NA;NA;Erebia euryale;0.919518760623792;  
MN138633;Lepidoptera;Boloria graeca;Boloria graeca;1;Boloria graeca;0.99999804714795;  
MN138635;Lepidoptera;Anthocharis cardamines;Anthocharis cardamines;1;Anthocharis  
cardamines;0.99999997953563;  
MN138636;Lepidoptera;Celastrina argiolus;Celastrina argiolus;1;Celastrina  
argiolus;0.999527385150531;  
MN138637;Lepidoptera;Vanessa cardui;Vanessa cardui;1;Vanessa cardui;0.999999803450484;  
MN138638;Lepidoptera;Melitaea cinxia;Melitaea cinxia;1;Melitaea cinxia;0.99999999999403;

MN138641;Lepidoptera;Cupido minimus;NA;0.003;Cupido minimus;0.999853615233319;  
MN138642;Lepidoptera;Melitaea didyma;Melitaea didyma;NA;Melitaea didyma;0.988520743221049;  
MN138645;Lepidoptera;Maniola jurtina;NA;0.001;Maniola jurtina;0.939220105860875;  
MN138646;Lepidoptera;Lampides boeticus;Lampides boeticus;1;Lampides boeticus;0.99999997713644;  
MN138647;Lepidoptera;Boloria euphrosyne;Boloria euphrosyne;1;Boloria euphrosyne;0.99997433270633;  
MN138648;Lepidoptera;Thymelicus lineola;Thymelicus lineola;1;Thymelicus lineola;0.999996187945915;  
MN138649;Lepidoptera;Polyommatus icarus;Polyommatus icarus;0.001;Polyommatus icarus;0.999851522482238;  
MN138649;Lepidoptera;Polyommatus icarus;Polyommatus icarus;0.001;Polyommatus icarus;0.999851522482238;  
MN138650;Lepidoptera;Aricia cramera;Aricia cramera;1;Aricia cramera;0.999993731037033;  
MN138651;Lepidoptera;Coenonympha pamphilus;Coenonympha pamphilus;1;Coenonympha pamphilus;0.999999999999744;  
MN138652;Lepidoptera;Thymelicus acteon;Thymelicus acteon;1;Thymelicus acteon;0.99999999752248;  
MN138653;Lepidoptera;Thymelicus acteon;Thymelicus acteon;1;Thymelicus acteon;0.99999999752248;  
MN138654;Lepidoptera;Papilio machaon;Papilio machaon;0.003;Papilio machaon;0.999482752749035;  
MN138655;Lepidoptera;Boloria titania;Boloria titania;0.999;Boloria titania;0.999431261609546;  
MN138656;Lepidoptera;Aricia agestis;NA;0.09;Aricia agestis;0.999208347982274;  
MN138657;Lepidoptera;Vanessa cardui;Vanessa cardui;1;Vanessa cardui;0.999999803450484;  
MN138658;Lepidoptera;Lycaena phlaeas;Lycaena phlaeas;1;Lycaena phlaeas;0.999999994740023;  
MN138659;Lepidoptera;Maniola jurtina;NA;0.012;Maniola jurtina;0.91755716175482;  
MN138661;Lepidoptera;Pieris napi;NA;0.011;Pieris napi;0.801985394724814;  
MN138663;Lepidoptera;Hipparchia hermione;NA;NA;NA;0.99999999999991;  
MN138664;Lepidoptera;Colias crocea;NA;0.059;NA;0.999999999999738;  
MN138665;Lepidoptera;Vanessa cardui;Vanessa cardui;1;Vanessa cardui;0.999999459983318;  
MN138666;Lepidoptera;Pieris napi;NA;0.011;Pieris napi;0.801985394724814;  
MN138668;Lepidoptera;Coenonympha pamphilus;Coenonympha pamphilus;1;Coenonympha pamphilus;0.999999999999488;  
MN138669;Lepidoptera;Cupido argiades;NA;0.499;NA;0.999999999984682;  
MN138672;Lepidoptera;Thymelicus sylvestris;Thymelicus sylvestris;1;Thymelicus sylvestris;0.999999981568351;  
MN138673;Lepidoptera;Lampides boeticus;Lampides boeticus;1;Lampides boeticus;0.99999999545906;  
MN138674;Lepidoptera;Lycaena alciphron;Lycaena alciphron;1;Lycaena alciphron;0.999999718239206;  
MN138679;Lepidoptera;Hipparchia fagi;NA;NA;Hipparchia fagi;0.958291584360022;  
MN138680;Lepidoptera;Erynnis tages;Erynnis tages;1;Erynnis tages;0.999999281987018;  
MN138681;Lepidoptera;Nymphalis c-album;NA;0.215;NA;0.999999192918557;  
MN138682;Lepidoptera;Fabriciana adippe;Fabriciana adippe;0.007;Fabriciana adippe;0.876018745965171;  
MN138683;Lepidoptera;Gegenes nostrodamus;Gegenes nostrodamus;1;Gegenes nostrodamus;0.999999996883645;  
MN138685;Lepidoptera;Pieris napi;NA;0.011;Pieris napi;0.801985394724814;  
MN138686;Lepidoptera;Limenitis camilla;NA;0.005;Limenitis camilla;0.999962352277235;  
MN138687;Lepidoptera;Argynnis aglaja;NA;0.009;NA;0.99999999998612;  
MN138690;Lepidoptera;Polyommatus icarus;NA;0.13;Polyommatus icarus;0.979762695748748;  
MN138690;Lepidoptera;Polyommatus icarus;NA;0.13;Polyommatus icarus;0.979762695748748;  
MN138691;Lepidoptera;Aricia agestis;NA;0.099;Aricia agestis;0.994857168775148;  
MN138693;Lepidoptera;Plebejus argus;NA;NA;Plebejus argus;0.969283117748927;  
MN138694;Lepidoptera;Vanessa atalanta;Vanessa atalanta;1;Vanessa atalanta;0.999999999757762;  
MN138695;Lepidoptera;Melitaea didyma;Melitaea didyma;NA;Melitaea didyma;0.986420113105139;  
MN138697;Lepidoptera;Melitaea didyma;Melitaea didyma;1;Melitaea didyma;0.999412077660356;  
MN138698;Lepidoptera;Boloria euphrosyne;Boloria euphrosyne;1;Boloria euphrosyne;0.999999050867014;  
MN138699;Lepidoptera;Satyrium ilicis;Satyrium ilicis;1;Satyrium ilicis;0.999999987901305;  
MN138700;Lepidoptera;Anthocharis cardamines;Anthocharis cardamines;1;Anthocharis cardamines;0.999999891507378;  
MN138701;Lepidoptera;Aricia agestis;NA;0.253;Aricia agestis;0.996350017387504;  
MN138703;Lepidoptera;Brintesia circe;Brintesia circe;1;Brintesia circe;0.99999974034464;  
MN138704;Lepidoptera;Thymelicus acteon;Thymelicus acteon;1;Thymelicus acteon;0.99999997365563;  
MN138705;Lepidoptera;Argynnis aglaja;NA;0.002;Speyeria aglaja;0.87239079736947;  
MN138706;Lepidoptera;Vanessa cardui;Vanessa cardui;1;Vanessa cardui;0.999999459983318;  
MN138707;Lepidoptera;Aporia crataegi;NA;0.009;Aporia crataegi;0.999996613335036;  
MN138708;Lepidoptera;Euphydryas aurinia;NA;0.137;Euphydryas aurinia;0.991077119919041;  
MN138709;Lepidoptera;Lasiommata megera;Lasiommata megera;1;Lasiommata megera;0.999928528239676;  
MN138710;Lepidoptera;Hipparchia leighebi;Hipparchia leighebi;1;Hipparchia leighebi;0.921532082781005;  
MN138711;Lepidoptera;Colias phicomone;NA;0.001;Colias phicomone;0.985598879697681;  
MN138712;Lepidoptera;Maniola jurtina;NA;0.001;Maniola jurtina;0.939220105860875;  
MN138713;Lepidoptera;Aricia agestis;NA;0.077;Aricia agestis;0.998556400834668;  
MN138714;Lepidoptera;Maniola jurtina;NA;0.001;Maniola jurtina;0.939220105860875;  
MN138715;Lepidoptera;Maniola cecilia;Pyronia cecilia;1;Pyronia cecilia;1;  
MN138716;Lepidoptera;Lycaena alciphron;Lycaena alciphron;1;Lycaena alciphron;0.999999928764825;  
MN138717;Lepidoptera;Melitaea varia;Melitaea varia;1;Melitaea varia;0.999998281358841;  
MN138718;Lepidoptera;Pieris rapae;NA;NA;Pieris rapae;0.99992588119495;  
MN138719;Lepidoptera;Thymelicus sylvestris;NA;0.305;Thymelicus sylvestris;0.99992851189478;  
MN138720;Lepidoptera;Maniola jurtina;NA;0.038;NA;0.99999999999524;  
MN138722;Lepidoptera;Polyommatus icarus;NA;0.002;Polyommatus icarus;0.998502314961965;

MN138722;Lepidoptera;Polyommatus icarus;NA;0.002;Polyommatus icarus;0.998502314961965;  
MN138724;Lepidoptera;Argynnis aglaja;NA;NA;Speyeria aglaja;0.872991147917853;  
MN138725;Lepidoptera;Polyommatus icarus;NA;0.001;Polyommatus icarus;0.981285528541973;  
MN138725;Lepidoptera;Polyommatus icarus;NA;0.001;Polyommatus icarus;0.981285528541973;  
MN138726;Lepidoptera;Aricia agestis;NA;0.069;Aricia agestis;0.995918114091591;  
MN138727;Lepidoptera;Satyrium spini;Satyrium spini;1;Satyrium spini;0.999999835426407;  
MN138728;Lepidoptera;Lycaena phlaeas;Lycaena phlaeas;1;Lycaena phlaeas;0.99999996363186;  
MN138729;Lepidoptera;Thymelicus acteon;Thymelicus acteon;1;Thymelicus acteon;0.9999999752248;  
MN138730;Lepidoptera;Fabriciana niobe;NA;0.001;Fabriciana niobe;0.977553955749008;  
MN138731;Lepidoptera;Polyommatus icarus;NA;0.166;Polyommatus icarus;0.749935576218847;  
MN138731;Lepidoptera;Polyommatus icarus;NA;0.166;Polyommatus icarus;0.749935576218847;  
MN138732;Lepidoptera;Erebia medusa;NA;0.009;Erebia medusa;0.986275612856827;  
MN138733;Lepidoptera;Lysandra hispana;NA;NA;NA;0.999868794849817;  
MN138734;Lepidoptera;Colias crocea;NA;0.059;NA;0.999999999999738;  
MN138735;Lepidoptera;Pieris napi;NA;0.011;Pieris napi;0.801985394724814;  
MN138736;Lepidoptera;Melitaea didyma;Melitaea didyma;1;Melitaea didyma;0.99958019737737;  
MN138738;Lepidoptera;Plebejus argus;NA;0.043;Plebejus argus;0.975534930033561;  
MN138739;Lepidoptera;Aphantopus hyperantus;Aphantopus hyperantus;0.003;Aphantopus  
hyperantus;0.99999455871523;  
MN138740;Lepidoptera;Erebia pronoe;Erebia pronoe;1;Erebia pronoe;0.999250891771858;  
MN138741;Lepidoptera;Polyommatus dolus;Polyommatus dolus;1;Polyommatus dolus;0.978004991113075;  
MN138742;Lepidoptera;Nymphalis c-album;NA;0.215;NA;0.999999192918557;  
MN138744;Lepidoptera;Fabriciana niobe;Fabriciana niobe;0.001;Fabriciana niobe;0.93186202957215;  
MN138745;Lepidoptera;Celastrina argiolus;Celastrina argiolus;1;Celastrina  
argiolus;0.999527385150531;  
MN138746;Lepidoptera;Cupido argiades;NA;0.499;NA;0.999999999984682;  
MN138747;Lepidoptera;Favonius quercus;NA;NA;Favonius quercus;0.87732961169742;  
MN138748;Lepidoptera;Lasiommata megera;Lasiommata megera;1;Lasiommata megera;0.999379144055441;  
MN138749;Lepidoptera;Maniola jurtina;Maniola jurtina;0.021;Maniola jurtina;0.802110870400691;  
MN138750;Lepidoptera;Pyrgus sidae;Pyrgus sidae;1;Pyrgus sidae;0.999994277634217;  
MN138751;Lepidoptera;Polyommatus amandus;Polyommatus amandus;0.003;Polyommatus  
amandus;0.999977069858459;  
MN138752;Lepidoptera;Thymelicus lineola;Thymelicus lineola;1;Thymelicus  
lineola;0.999969483849691;  
MN138753;Lepidoptera;Pieris rapae;NA;NA;Pieris rapae;0.999992588119495;  
MN138754;Lepidoptera;Cercyonis lupina;Hyponephele lupina;1;Hyponephele lupina;0.999999917600863;  
MN138755;Lepidoptera;Erynnis tages;Erynnis tages;1;Erynnis tages;0.999999281987018;  
MN138756;Lepidoptera;Plebejus argus;NA;0.122;Plebejus argus;0.956948912376078;  
MN138757;Lepidoptera;Parnassius apollo;Parnassius apollo;1;Parnassius apollo;0.992704703916692;  
MN138758;Lepidoptera;Euphydryas cynthia;Euphydryas cynthia;1;Euphydryas  
cynthia;0.999998812102883;  
MN138759;Lepidoptera;Nymphalis c-album;NA;0.215;NA;0.999999192918557;  
MN138760;Lepidoptera;Ochlodes sylvanus;NA;0.316;Ochlodes sylvanus;0.996318754838625;  
MN138761;Lepidoptera;Pyrgus onopordi;Pyrgus onopordi;1;Pyrgus onopordi;0.999997111229755;  
MN138762;Lepidoptera;Thymelicus sylvestris;Thymelicus sylvestris;1;Thymelicus  
sylvestris;0.999999985935205;  
MN138765;Lepidoptera;Lasiommata megera;Lasiommata megera;1;Lasiommata megera;0.999379144055441;  
MN138766;Lepidoptera;Lasiommata maera;Lasiommata maera;1;Lasiommata maera;0.999996552555305;  
MN138767;Lepidoptera;Melitaea cinxia;Melitaea cinxia;1;Melitaea cinxia;0.99999999999716;  
MN138768;Lepidoptera;Cupido alcetas;NA;0.068;Cupido alcetas;0.88988907876118;  
MN138769;Lepidoptera;Cercyonis lupina;Hyponephele lupina;1;Hyponephele lupina;0.99999806147021;  
MN138770;Lepidoptera;Melitaea didyma;Melitaea didyma;0.002;Melitaea didyma;0.993980744397441;  
MN138771;Lepidoptera;Maniola jurtina;NA;0.038;NA;0.99999999999524;  
MN138773;Lepidoptera;Polyommatus icarus;NA;0.004;Polyommatus icarus;0.999481683747521;  
MN138773;Lepidoptera;Polyommatus icarus;NA;0.004;Polyommatus icarus;0.999481683747521;  
MN138774;Lepidoptera;Nymphalis c-album;NA;0.215;NA;0.999999192918557;  
MN138776;Lepidoptera;Maniola tithonus;Pyronia tithonus;1;Pyronia tithonus;1;  
MN138778;Lepidoptera;Colias alfacariensis;Colias alfacariensis;0.001;Colias  
alfacariensis;0.999857790810452;  
MN138779;Lepidoptera;Anthocharis damone;Anthocharis damone;1;Anthocharis  
damone;0.9999999829717;  
MN138780;Lepidoptera;Aricia cramera;Aricia cramera;1;Aricia cramera;0.999993731037033;  
MN138781;Lepidoptera;Maniola tithonus;Pyronia tithonus;1;Pyronia tithonus;1;  
MN138782;Lepidoptera;Anthocharis damone;Anthocharis damone;1;Anthocharis  
damone;0.99999974090599;  
MN138784;Lepidoptera;Lasiommata megera;Lasiommata megera;1;Lasiommata megera;0.999928528239676;  
MN138785;Lepidoptera;Lasiommata maera;Lasiommata maera;1;Lasiommata maera;0.999996552555305;  
MN138786;Lepidoptera;Maniola jurtina;NA;0.063;Maniola jurtina;0.770025363931686;  
MN138788;Lepidoptera;Pieris rapae;NA;NA;Pieris rapae;0.999992588119495;  
MN138789;Lepidoptera;Lasiommata megera;Lasiommata megera;1;Lasiommata megera;0.999928528239676;  
MN138790;Lepidoptera;Glaucopsyche alexis;Glaucopsyche alexis;0.001;Glaucopsyche  
alexis;0.94042380088325;  
MN138791;Lepidoptera;Vanessa atalanta;Vanessa atalanta;1;Vanessa atalanta;0.99999999757762;  
MN138793;Lepidoptera;Maniola jurtina;NA;0.001;Maniola jurtina;0.939220105860875;  
MN138794;Lepidoptera;Gonepteryx rhamni;Gonepteryx rhamni;1;Gonepteryx rhamni;0.999673119534565;  
MN138796;Lepidoptera;Hipparchia semele;Hipparchia semele;0.001;Hipparchia  
semele;0.924825538448229;  
MN138798;Lepidoptera;Thymelicus sylvestris;NA;0.324;Thymelicus sylvestris;0.999940778442454;

MN138801;Lepidoptera;Euphydryas aurinia;NA;0.31;Euphydryas aurinia;0.993387708761386;  
MN138803;Lepidoptera;Melitaea cinxia;Melitaea cinxia;1;Melitaea cinxia;0.99999999999631;  
MN138805;Lepidoptera;Melanargia galathea;Melanargia galathea;NA;Melanargia  
galathea;0.981855578470499;  
MN138809;Lepidoptera;Lysandra coridon;NA;NA;NA;0.998070184737648;  
MN138810;Lepidoptera;Lasiommata megera;Lasiommata megera;1;Lasiommata megera;0.999928528239676;  
MN138811;Lepidoptera;Favonius quercus;NA;0.002;Favonius quercus;0.732659082125295;  
MN138812;Lepidoptera;Plebejus idas;NA;0.007;NA;0.999546324331549;  
MN138813;Lepidoptera;Polyommatus daphnis;Polyommatus daphnis;1;Polyommatus  
daphnis;0.99977716269156;  
MN138814;Lepidoptera;Plebejus argyrognomon;NA;0.001;NA;0.994620093546684;  
MN138815;Lepidoptera;Maniola tithonus;Pyronia tithonus;1;Pyronia tithonus;1;  
MN138816;Lepidoptera;Boloria graeca;Boloria graeca;1;Boloria graeca;0.999999954422493;  
MN138818;Lepidoptera;Boloria euphrosyne;Boloria euphrosyne;1;Boloria  
euphrosyne;0.999998247490937;  
MN138820;Lepidoptera;Erebia epiphron;NA;NA;Erebia epiphron;0.98984833968802;  
MN138821;Lepidoptera;Maniola jurtina;NA;NA;Maniola jurtina;0.973823960006955;  
MN138823;Lepidoptera;Euphydryas aurinia;NA;0.31;Euphydryas aurinia;0.993387708761386;  
MN138824;Lepidoptera;Polyommatus dolus;Polyommatus dolus;0.003;Polyommatus  
dolus;0.946056341712732;  
MN138827;Lepidoptera;Glaucopsyche alexis;Glaucopsyche alexis;0.001;Glaucopsyche  
alexis;0.94042380088325;  
MN138829;Lepidoptera;Callophrys avis;Callophrys avis;1;Callophrys avis;0.992335035373355;  
MN138830;Lepidoptera;Aricia agestis;Aricia agestis;0.004;Aricia agestis;0.999546222180046;  
MN138831;Lepidoptera;Lasiommata maera;Lasiommata maera;1;Lasiommata maera;0.999988599344549;  
MN138833;Lepidoptera;Callophrys rubi;NA;0.019;Callophrys rubi;0.998201459637982;  
MN138834;Lepidoptera;Colias phicomone;NA;0.001;Colias phicomone;0.985598879697681;  
MN138837;Lepidoptera;Lycaena virgaureae;NA;0.249;Lycaena virgaureae;0.999388659324442;  
MN138840;Lepidoptera;Coenonympha pamphilus;Coenonympha pamphilus;1;Coenonympha  
pamphilus;0.99999999999744;  
MN138841;Lepidoptera;Maniola jurtina;NA;0.667;NA;0.999999999940105;  
MN138842;Lepidoptera;Carcharodus alceae;Carcharodus alceae;1;Carcharodus  
alceae;0.99999998465938;  
MN138843;Lepidoptera;Vanessa cardui;Vanessa cardui;1;Vanessa cardui;0.999999803450484;  
MN138844;Lepidoptera;Satyrium acaciae;Satyrium acaciae;1;Satyrium acaciae;0.999999951077798;  
MN138845;Lepidoptera;Lycaena hippothoe;Lycaena hippothoe;0.001;Lycaena  
hippothoe;0.9980672811561;  
MN138846;Lepidoptera;Thymelicus lineola;Thymelicus lineola;1;Thymelicus  
lineola;0.999995927238524;  
MN138847;Lepidoptera;Lycaena dispar;Lycaena dispar;1;Lycaena dispar;0.99999990743959;  
MN138848;Lepidoptera;Favonius quercus;NA;0.176;Favonius quercus;0.828947799604254;  
MN138849;Lepidoptera;Aporia crataegi;NA;NA;Aporia crataegi;0.999997860566808;  
MN138850;Lepidoptera;Cercyonis lupina;Hyponephele lupina;1;Hyponephele lupina;0.99999968814081;  
MN138851;Lepidoptera;Melitaea varia;Melitaea varia;1;Melitaea varia;0.999998691569804;  
MN138852;Lepidoptera;Maniola cecilia;Pyronia cecilia;NA;Pyronia cecilia;1;  
MN138853;Lepidoptera;Colias phicomone;NA;0.001;Colias phicomone;0.985598879697681;  
MN138854;Lepidoptera;Maniola cecilia;Pyronia cecilia;NA;Pyronia cecilia;1;  
MN138855;Lepidoptera;Anthocharis cardamines;Anthocharis cardamines;1;Anthocharis  
cardamines;0.99999984875757;  
MN138857;Lepidoptera;Maniola cecilia;Pyronia cecilia;1;Pyronia cecilia;1;  
MN138858;Lepidoptera;Lasiommata megera;Lasiommata megera;1;Lasiommata megera;0.999934558983719;  
MN138859;Lepidoptera;Gonepteryx cleopatra;Gonepteryx cleopatra;0.998;Gonepteryx  
cleopatra;0.999118636582266;  
MN138860;Lepidoptera;Aricia cramera;Aricia cramera;1;Aricia cramera;0.999993731037033;  
MN138863;Lepidoptera;Issoria lathonia;Issoria lathonia;1;Issoria lathonia;0.9999999989257;  
MN138864;Lepidoptera;Maniola tithonus;Pyronia tithonus;1;Pyronia tithonus;1;  
MN138866;Lepidoptera;Fabriciana niobe;NA;0.001;Fabriciana niobe;0.989214650993052;  
MN138867;Lepidoptera;Apatura ilia;NA;0.165;Apatura ilia;0.956796812031481;  
MN138868;Lepidoptera;Maniola jurtina;NA;0.001;Maniola jurtina;0.939220105860875;  
MN138869;Lepidoptera;Gegenes nostrodamus;Gegenes nostrodamus;1;Gegenes  
nostrodamus;0.99999996883645;  
MN138871;Lepidoptera;Issoria lathonia;Issoria lathonia;1;Issoria lathonia;0.99999999989257;  
MN138872;Lepidoptera;Chazara briseis;Chazara briseis;0.001;Chazara briseis;0.999987492373468;  
MN138874;Lepidoptera;Lasiommata megera;Lasiommata megera;1;Lasiommata megera;0.999928528239676;  
MN138877;Lepidoptera;Brintesia circe;Brintesia circe;1;Brintesia circe;0.99999951254154;  
MN138878;Lepidoptera;Brenthis hecate;NA;0.104;Brenthis hecate;0.999656452740552;  
MN138879;Lepidoptera;Erebia cassioides;NA;NA;NA;0.99999999999901;  
MN138880;Lepidoptera;Coenonympha corinna;Coenonympha corinna;1;Coenonympha  
corinna;0.99999999974449;  
MN138881;Lepidoptera;Pararge aegeria;Pararge aegeria;1;Pararge aegeria;0.99999999963165;  
MN138885;Lepidoptera;Boloria euphrosyne;Boloria euphrosyne;1;Boloria  
euphrosyne;0.99999700428037;  
MN138887;Lepidoptera;Nymphalis c-album;NA;0.215;NA;0.999999192918557;  
MN138888;Lepidoptera;Coenonympha glycerion;NA;0.221;Coenonympha glycerion;0.999998704466507;  
MN138889;Lepidoptera;Nymphalis c-album;NA;0.215;NA;0.999999192918557;  
MN138890;Lepidoptera;Satyrus ferula;Satyrus ferula;0.001;Satyrus ferula;0.997072695563869;  
MN138893;Lepidoptera;Lycaena alciphron;Lycaena alciphron;1;Lycaena alciphron;0.99999899077386;  
MN138894;Lepidoptera;Colias crocea;NA;0.059;NA;0.99999999999738;

MN138896;Lepidoptera;Vanessa atalanta;Vanessa atalanta;1;Vanessa atalanta;0.999999999757762;  
MN138897;Lepidoptera;Hipparchia semele;NA;0.002;Hipparchia semele;0.784603069619426;  
MN138898;Lepidoptera;Agriades orbitulus;NA;0.031;Agriades orbitulus;0.998409903321215;  
MN138900;Lepidoptera;Brintesia circe;Brintesia circe;1;Brintesia circe;0.999999898349165;  
MN138901;Lepidoptera;Pieris napi;NA;0.028;Pieris napi;0.888205720664699;  
MN138902;Lepidoptera;Polyommatus icarus;NA;0.002;Polyommatus icarus;0.999149936742386;  
MN138902;Lepidoptera;Polyommatus icarus;NA;0.002;Polyommatus icarus;0.999149936742386;  
MN138903;Lepidoptera;Ochlodes sylvanus;NA;0.119;Ochlodes sylvanus;0.997373902608318;  
MN138904;Lepidoptera;Callophrys rubi;NA;0.001;Callophrys rubi;0.99870518510598;  
MN138905;Lepidoptera;Aphantopus hyperantus;Aphantopus hyperantus;0.006;Aphantopus  
hyperantus;0.999998615504572;  
MN138906;Lepidoptera;Cupido minimus;NA;0.009;Cupido minimus;0.999791453712643;  
MN138908;Lepidoptera;Pyrgus armoricanus;Pyrgus armoricanus;1;Pyrgus  
armoricanus;0.999997353848817;  
MN138909;Lepidoptera;Aricia artaxerxes;Plebejus argus;1;Aricia artaxerxes;0.999743187199922;  
MN138910;Lepidoptera;Fabriciana adippe;Fabriciana adippe;NA;Fabriciana adippe;0.861972738590056;  
MN138911;Lepidoptera;Maniola jurtina;Maniola jurtina;0.009;Maniola jurtina;0.977790299613342;  
MN138912;Lepidoptera;Lampides boeticus;Lampides boeticus;1;Lampides boeticus;0.99999999545906;  
MN138914;Lepidoptera;Maniola cecilia;Pyronia cecilia;NA;Pyronia cecilia;1;  
MN138916;Lepidoptera;Maniola jurtina;NA;NA;Maniola jurtina;0.979727053537369;  
MN138917;Lepidoptera;Anthocharis cardamines;Anthocharis cardamines;1;Anthocharis  
cardamines;0.999999940675226;  
MN138918;Lepidoptera;Maniola jurtina;Maniola jurtina;NA;Maniola jurtina;0.827771985565139;  
MN138919;Lepidoptera;Lycaena tityrus;Lycaena tityrus;1;Lycaena tityrus;0.999997027007808;  
MN138921;Lepidoptera;Maniola jurtina;NA;0.146;NA;0.99999999999341;  
MN138922;Lepidoptera;Polyommatus escheri;Polyommatus escheri;1;Polyommatus  
escheri;0.9999999510217;  
MN138923;Lepidoptera;Lycaena tityrus;Lycaena tityrus;1;Lycaena tityrus;0.999995729087172;  
MN138927;Lepidoptera;Lasiommata maera;Lasiommata maera;1;Lasiommata maera;0.999996552555305;  
MN138930;Lepidoptera;Vanessa atalanta;Vanessa atalanta;1;Vanessa atalanta;0.99999999757762;  
MN138932;Lepidoptera;Euphydryas aurinia;NA;0.118;Euphydryas aurinia;0.995366309208913;  
MN138933;Lepidoptera;Lasiommata megera;Lasiommata megera;1;Lasiommata megera;0.999941247118496;  
MN138934;Lepidoptera;Lycaena tityrus;Lycaena tityrus;1;Lycaena tityrus;0.99998928238034;  
MN138935;Lepidoptera;Lycaena alciphron;Lycaena alciphron;1;Lycaena alciphron;0.99999925232376;  
MN138936;Lepidoptera;Apatura ilia;NA;NA;Apatura ilia;0.971867715725452;  
MN138937;Lepidoptera;Callophrys rubi;NA;0.019;Callophrys rubi;0.998201459637982;  
MN138938;Lepidoptera;Erebia pandrose;Erebia pandrose;0.013;Erebia pandrose;0.974388092470716;  
MN138939;Lepidoptera;Lasiommata megera;Lasiommata megera;1;Lasiommata megera;0.999879158841;  
MN138940;Lepidoptera;Pieris napi;NA;0.011;Pieris napi;0.801985394724814;  
MN138941;Lepidoptera;Lasiommata megera;Lasiommata megera;1;Lasiommata megera;0.999928528239676;  
MN138942;Lepidoptera;Aricia agestis;NA;0.067;Aricia agestis;0.999509743227786;  
MN138944;Lepidoptera;Plebejus argyrognomon;NA;0.001;NA;0.994620093546684;  
MN138945;Lepidoptera;Vanessa cardui;Vanessa cardui;1;Vanessa cardui;0.99999803450484;  
MN138946;Lepidoptera;Maniola jurtina;NA;0.005;Maniola jurtina;0.944899890539899;  
MN138947;Lepidoptera;Nymphalis c-album;NA;0.215;NA;0.999999192918557;  
MN138950;Lepidoptera;Aricia cramera;Aricia cramera;1;Aricia cramera;0.999993731037033;  
MN138951;Lepidoptera;Gonepteryx rhamni;NA;0.474;Gonepteryx rhamni;0.982076396127858;  
MN138952;Lepidoptera;Melitaea deione;Melitaea deione;1;Melitaea deione;0.999993024796593;  
MN138955;Lepidoptera;Satyrus actaea;Satyrus actaea;0.002;Satyrus actaea;0.996459824853088;  
MN138956;Lepidoptera;Issoria lathonia;Issoria lathonia;1;Issoria lathonia;0.99999999989257;  
MN138958;Lepidoptera;Erebia euryale;NA;NA;Erebia euryale;0.919518760623792;  
MN138959;Lepidoptera;Nymphalis c-album;NA;0.028;Polygonia c-album;0.76622230265535;  
MN138960;Lepidoptera;Colias hyale;Colias hyale;0.015;Colias hyale;0.99997884296128;  
MN138964;Lepidoptera;Maniola jurtina;NA;NA;Maniola jurtina;0.950689021412593;  
MN138965;Lepidoptera;Aricia agestis;NA;0.253;Aricia agestis;0.996350017387504;  
MN138966;Lepidoptera;Colias alfacariensis;Colias alfacariensis;0.001;Colias  
alfacariensis;0.999926026317526;  
MN138967;Lepidoptera;Lycaena hippothoe;NA;NA;Lycaena hippothoe;0.96171722036274;  
MN138968;Lepidoptera;Melitaea parthenoides;Melitaea parthenoides;1;Melitaea  
parthenoides;0.999999995982648;  
MN138970;Lepidoptera;Colias crocea;NA;0.059;NA;0.99999999999738;  
MN138971;Lepidoptera;Issoria lathonia;Issoria lathonia;1;Issoria lathonia;0.99999999989257;  
MN138972;Lepidoptera;Pieris napi;NA;NA;NA;100.000.000.000.001;  
MN138973;Lepidoptera;Pyrgus carthami;Pyrgus carthami;1;Pyrgus carthami;0.999998997209607;  
MN138974;Lepidoptera;Nymphalis c-album;NA;0.215;NA;0.999999192918557;  
MN138976;Lepidoptera;Erebia pronoe;Erebia pronoe;NA;Erebia pronoe;0.790922387957511;  
MN138977;Lepidoptera;Pyrgus armoricanus;Pyrgus armoricanus;1;Pyrgus  
armoricanus;0.999997353848817;  
MN138978;Lepidoptera;Lasiommata maera;Lasiommata maera;1;Lasiommata maera;0.999995366023818;  
MN138979;Lepidoptera;Maniola jurtina;NA;NA;NA;0.9999999985062;  
MN138980;Lepidoptera;Thymelicus sylvestris;NA;0.324;Thymelicus sylvestris;0.999940778442454;  
MN138982;Lepidoptera;Erebia medusa;NA;0.01;Erebia medusa;0.979621232162315;  
MN138983;Lepidoptera;Thymelicus sylvestris;Thymelicus sylvestris;1;Thymelicus  
sylvestris;0.999999985935205;  
MN138984;Lepidoptera;Satyrium spini;Satyrium spini;1;Satyrium spini;0.99999835426407;  
MN138985;Lepidoptera;Cercyonis lupina;Hyponephele lupina;1;Hyponephele lupina;0.999999971627091;  
MN138986;Lepidoptera;Pyrgus malvae;Pyrgus malvae;0.999;Pyrgus malvae;0.993531783407179;  
MN138987;Lepidoptera;Euphydryas aurinia;NA;0.31;Euphydryas aurinia;0.993387708761386;

MN138988;Lepidoptera;Euphydryas aurinia;NA;0.001;Euphydryas aurinia;0.995576749826865;  
MN138990;Lepidoptera;Parnassius apollo;Parnassius apollo;1;Parnassius apollo;0.992704703916692;  
MN138992;Lepidoptera;Polyommatus dolus;Polyommatus dolus;0.997;Polyommatus  
dolus;0.955195871823379;  
MN138993;Lepidoptera;Colias crocea;NA;0.059;NA;0.999999999999738;  
MN138997;Lepidoptera;Fabriciana adippe;NA;0.001;Fabriciana adippe;0.957131879909897;  
MN138998;Lepidoptera;Erynnis tages;Erynnis tages;1;Erynnis tages;0.999999281987018;  
MN139000;Lepidoptera;Gonepteryx rhamni;NA;0.474;Gonepteryx rhamni;0.982076396127858;  
MN139002;Lepidoptera;Minois dryas;NA;0.025;Minois dryas;0.850746026247397;  
MN139003;Lepidoptera;Fabriciana niobe;NA;0.005;Fabriciana niobe;0.992125835358755;  
MN139004;Lepidoptera;Anthocharis euphenoides;NA;0.326;Anthocharis euphenoides;0.917872480229179;  
MN139006;Lepidoptera;Maniola jurtina;NA;0.001;Maniola jurtina;0.939220105860875;  
MN139007;Lepidoptera;Nymphalis c-album;NA;0.215;NA;0.999999192918557;  
MN139008;Lepidoptera;Erebia cassioides;NA;0.001;NA;0.999999999999959;  
MN139010;Lepidoptera;Thymelicus acteon;Thymelicus acteon;1;Thymelicus acteon;0.99999997365563;  
MN139011;Lepidoptera;Aglais urticae;NA;0.05;Aglais urticae;0.990090905940875;  
MN139012;Lepidoptera;Satyrium spini;Satyrium spini;1;Satyrium spini;0.99999835426407;  
MN139013;Lepidoptera;Lycaena phlaeas;Lycaena phlaeas;1;Lycaena phlaeas;0.99999996363186;  
MN139014;Lepidoptera;Satyrium pruni;NA;0.076;Satyrium pruni;0.990322364021655;  
MN139015;Lepidoptera;Lasiommata paramegaera;Lasiommata paramegaera;0.999;Lasiommata  
paramegaera;0.995283446287531;  
MN139016;Lepidoptera;Melitaea deione;Melitaea deione;1;Melitaea deione;0.999996202527362;  
MN139021;Lepidoptera;Lasiommata megera;Lasiommata megera;1;Lasiommata megera;0.999379144055441;  
MN139022;Lepidoptera;Pieris napi;NA;NA;Pieris napi;0.863911025205274;  
MN139023;Lepidoptera;Aricia agestis;NA;0.253;Aricia agestis;0.996350017387504;  
MN139024;Lepidoptera;Cupido minimus;NA;0.006;Cupido minimus;0.999768371759258;  
MN139025;Lepidoptera;Polyommatus icarus;Polyommatus icarus;0.001;Polyommatus  
icarus;0.999815390691822;  
MN139025;Lepidoptera;Polyommatus icarus;Polyommatus icarus;0.001;Polyommatus  
icarus;0.999815390691822;  
MN139026;Lepidoptera;Plebejus argyrognomon;NA;0.001;NA;0.998518811781132;  
MN139029;Lepidoptera;Cupido alcetas;NA;0.068;Cupido alcetas;0.88988907876118;  
MN139030;Lepidoptera;Hipparchia hermione;NA;NA;NA;0.99999999999991;  
MN139034;Lepidoptera;Satyrium acaciae;Satyrium acaciae;1;Satyrium acaciae;0.999999374890702;  
MN139036;Lepidoptera;Coenonympha arcania;Coenonympha arcania;0.033;Coenonympha  
arcania;0.993266644798764;  
MN139037;Lepidoptera;Brenthis hecate;Brenthis hecate;0.006;Brenthis hecate;0.99995137380518;  
MN139038;Lepidoptera;Lycaena hippothoe;Lycaena hippothoe;NA;Lycaena hippothoe;0.989480999146802;  
MN139039;Lepidoptera;Erebia oeme;NA;0.114;Erebia oeme;0.99999999830635;  
MN139040;Lepidoptera;Pyrgus cacaliae;Pyrgus cacaliae;0.001;Pyrgus cacaliae;0.997779968725098;  
MN139041;Lepidoptera;Polyommatus damon;Polyommatus damon;1;Polyommatus damon;0.99999982210126;  
MN139043;Lepidoptera;Satyrium spini;Satyrium spini;1;Satyrium spini;0.999999874306646;  
MN139044;Lepidoptera;Coenonympha arcania;NA;0.004;NA;0.999999999999983;  
MN139045;Lepidoptera;Euphydryas Cynthia;Euphydryas Cynthia;1;Euphydryas  
Cynthia;0.99999999705039;  
MN139048;Lepidoptera;Aricia agestis;NA;0.253;Aricia agestis;0.996350017387504;  
MN139050;Lepidoptera;Polyommatus damon;Polyommatus damon;1;Polyommatus damon;0.99999982210126;  
MN139051;Lepidoptera;Hipparchia leighebi;Hipparchia leighebi;0.001;Hipparchia  
leighebi;0.886425158869477;  
MN139052;Lepidoptera;Thymelicus lineola;Thymelicus lineola;1;Thymelicus  
lineola;0.999971535093703;  
MN139053;Lepidoptera;Lampides boeticus;Lampides boeticus;1;Lampides boeticus;0.9999999876789;  
MN139055;Lepidoptera;Anthocharis cardamines;Anthocharis cardamines;1;Anthocharis  
cardamines;0.99999997953563;  
MN139059;Lepidoptera;Melitaea cinxia;Melitaea cinxia;1;Melitaea cinxia;0.99999999999659;  
MN139060;Lepidoptera;Pyrgus malvoides;NA;0.176;Pyrgus malvoides;0.940490890379026;  
MN139061;Lepidoptera;Celastrina argiolus;Celastrina argiolus;NA;Celastrina  
argiolus;0.998817020643142;  
MN139062;Lepidoptera;Aglais urticae;NA;NA;Aglais urticae;0.985780134057395;  
MN139063;Lepidoptera;Hipparchia hermione;NA;NA;NA;0.999999999999999;  
MN139065;Lepidoptera;Lasiommata megera;Lasiommata megera;1;Lasiommata megera;0.999928528239676;  
MN139068;Lepidoptera;Argynnis aglaja;NA;NA;Speyeria aglaja;0.872991147917853;  
MN139069;Lepidoptera;Gonepteryx cleopatra;Gonepteryx cleopatra;0.998;Gonepteryx  
cleopatra;0.999118636582266;  
MN139070;Lepidoptera;Polyommatus icarus;NA;0.166;Polyommatus icarus;0.749935576218847;  
MN139070;Lepidoptera;Polyommatus icarus;NA;0.166;Polyommatus icarus;0.749935576218847;  
MN139071;Lepidoptera;Polyommatus icarus;Polyommatus icarus;0.001;Polyommatus  
icarus;0.999851522482238;  
MN139071;Lepidoptera;Polyommatus icarus;Polyommatus icarus;0.001;Polyommatus  
icarus;0.999851522482238;  
MN139072;Lepidoptera;Satyrium ilicis;Satyrium ilicis;1;Satyrium ilicis;0.999999987901305;  
MN139073;Lepidoptera;Celastrina argiolus;Celastrina argiolus;1;Celastrina  
argiolus;0.999527385150531;  
MN139078;Lepidoptera;Aglais urticae;Aglais urticae;0.001;Aglais urticae;0.994396335177485;  
MN139079;Lepidoptera;Lycaena hippothoe;Lycaena hippothoe;0.001;Lycaena  
hippothoe;0.9980672811561;  
MN139080;Lepidoptera;Erebia neoridas;Erebia neoridas;NA;Erebia neoridas;0.998631936578793;  
MN139081;Lepidoptera;Pyrgus alveus;NA;NA;Pyrgus alveus;0.920439481638217;



MN139083;Lepidoptera;Glaucopsyche alexis;Glaucopsyche alexis;0.001;Glaucopsyche alexis;0.94042380088325;  
 MN139084;Lepidoptera;Maniola jurtina;NA;0.001;Maniola jurtina;0.939220105860875;  
 MN139085;Lepidoptera;Pyrgus carthami;Pyrgus carthami;1;Pyrgus carthami;0.999998997209607;  
 MN139086;Lepidoptera;Celastrina argiolus;Celastrina argiolus;1;Celastrina argiolus;0.999708846309046;  
 MN139087;Lepidoptera;Lycaena tityrus;Lycaena tityrus;1;Lycaena tityrus;0.999998928238034;  
 MN139088;Lepidoptera;Cupido alcetas;NA;0.218;Cupido alcetas;0.833501983138177;  
 MN139089;Lepidoptera;Erebia montana;Erebia montana;1;Erebia montana;0.999627744460498;  
 MN139091;Lepidoptera;Erebia melampus;Erebia melampus;NA;Erebia melampus;0.970136285597645;  
 MN139092;Lepidoptera;Hipparchia fidia;Hipparchia fidia;1;Hipparchia fidia;1;  
 MN139093;Lepidoptera;Erebia neoridas;NA;NA;Erebia neoridas;0.99731844101466;  
 MN139094;Lepidoptera;Maniola jurtina;NA;NA;Maniola jurtina;0.962368106146462;  
 MN139095;Lepidoptera;Vanessa cardui;Vanessa cardui;1;Vanessa cardui;0.999997579965112;  
 MN139096;Lepidoptera;Araschnia levana;Araschnia levana;1;Araschnia levana;0.99999972187832;  
 MN139100;Lepidoptera;Thymelicus acteon;Thymelicus acteon;1;Thymelicus acteon;0.9999999752248;  
 MN139101;Lepidoptera;Hipparchia sbordonii;NA;NA;Hipparchia semele;0.748345401572611;  
 MN139102;Lepidoptera;Colias palaeno;NA;0.002;NA;0.99999999983681;  
 MN139104;Lepidoptera;Erebia meolans;Erebia meolans;NA;Erebia meolans;0.999855133075834;  
 MN139106;Lepidoptera;Lasiommata maera;Lasiommata maera;1;Lasiommata maera;0.999996380940229;  
 MN139107;Lepidoptera;Maniola jurtina;NA;0.012;Maniola jurtina;0.91755716175482;  
 MN139108;Lepidoptera;Aricia cramera;Aricia cramera;1;Aricia cramera;0.999995777202847;  
 MN139111;Lepidoptera;Erebia stiria;NA;NA;Erebia styx;0.890739244956497;  
 MN139112;Lepidoptera;Thymelicus acteon;Thymelicus acteon;1;Thymelicus acteon;0.99999996630038;  
 MN139113;Lepidoptera;Polyommatus icarus;Polyommatus icarus;0.001;Polyommatus icarus;0.999851522482238;  
 MN139113;Lepidoptera;Polyommatus icarus;Polyommatus icarus;0.001;Polyommatus icarus;0.999851522482238;  
 MN139114;Lepidoptera;Polyommatus icarus;NA;0.002;Polyommatus icarus;0.998502314961965;  
 MN139114;Lepidoptera;Polyommatus icarus;NA;0.002;Polyommatus icarus;0.998502314961965;  
 MN139116;Lepidoptera;Plebejus argus;NA;0.095;Plebejus argus;0.975968053247715;  
 MN139117;Lepidoptera;Aricia eumedon;Eumedonia eumedon;0.002;Eumedonia eumedon;0.99911741929599;  
 MN139118;Lepidoptera;Pyrgus armoricanus;Pyrgus armoricanus;1;Pyrgus armoricanus;0.999914079595002;  
 MN139119;Lepidoptera;Maniola jurtina;NA;0.038;NA;0.99999999999524;  
 MN139120;Lepidoptera;Fabriciana adippe;Fabriciana adippe;NA;Fabriciana adippe;0.845993302533839;  
 MN139121;Lepidoptera;Maniola jurtina;NA;0.001;Maniola jurtina;0.970021298748324;  
 MN139122;Lepidoptera;Erynnis tages;Erynnis tages;1;Erynnis tages;0.999999281987018;  
 MN139124;Lepidoptera;Colias alfacariensis;Colias alfacariensis;0.001;Colias alfacariensis;0.999926026317526;  
 MN139126;Lepidoptera;Lycaena phlaeas;Lycaena phlaeas;1;Lycaena phlaeas;0.999999996618726;  
 MN139127;Lepidoptera;Lampides boeticus;Lampides boeticus;1;Lampides boeticus;0.99999999545906;  
 MN139128;Lepidoptera;Pyrgus onopordi;Pyrgus onopordi;1;Pyrgus onopordi;0.999997111229755;  
 MN139129;Lepidoptera;Thymelicus sylvestris;NA;0.333;Thymelicus sylvestris;0.999926375650344;  
 MN139130;Lepidoptera;Lycaena hippothoe;NA;NA;Lycaena hippothoe;0.96171722036274;  
 MN139132;Lepidoptera;Aricia agestis;NA;0.067;Aricia agestis;0.999509743227786;  
 MN139134;Lepidoptera;Lasiommata maera;Lasiommata maera;1;Lasiommata maera;0.999996200814449;  
 MN139136;Lepidoptera;Colias crocea;NA;0.059;NA;0.999999999999738;  
 MN139137;Lepidoptera;Anthocharis euphenoides;NA;0.131;Anthocharis euphenoides;0.934740202775498;  
 MN139138;Lepidoptera;Thymelicus acteon;Thymelicus acteon;1;Thymelicus acteon;0.9999999752248;  
 MN139139;Lepidoptera;Pyrgus serratulae;Pyrgus serratulae;1;Pyrgus serratulae;0.99999848602397;  
 MN139140;Lepidoptera;Satyrium spini;Satyrium spini;1;Satyrium spini;0.999999721054916;  
 MN139142;Lepidoptera;Colias crocea;NA;0.059;NA;0.999999999999738;  
 MN139143;Lepidoptera;Colias crocea;NA;0.059;NA;0.999999999999738;  
 MN139152;Lepidoptera;Erebia melampus;Erebia melampus;0.011;Erebia melampus;0.975499903768874;  
 MN139154;Lepidoptera;Maniola jurtina;NA;NA;Maniola jurtina;0.957544379788978;  
 MN139156;Lepidoptera;Fabriciana adippe;NA;NA;Fabriciana adippe;0.922280384106682;  
 MN139158;Lepidoptera;Thymelicus sylvestris;Thymelicus sylvestris;1;Thymelicus sylvestris;0.99999876153052;  
 MN139159;Lepidoptera;Aricia cramera;Aricia cramera;1;Aricia cramera;0.999990014848976;  
 MN139160;Lepidoptera;Cupido minimus;NA;0.006;Cupido minimus;0.999768371759258;  
 MN139161;Lepidoptera;Pyrgus sidae;Pyrgus sidae;1;Pyrgus sidae;0.999994277634217;  
 MN139163;Lepidoptera;Plebejus argus;Plebejus argus;0.016;Plebejus argus;0.962605109836459;  
 MN139164;Lepidoptera;Lycaena hippothoe;Lycaena hippothoe;0.002;Lycaena hippothoe;0.994699106153046;  
 MN139165;Lepidoptera;Carcharodus alceae;Carcharodus alceae;0.999;Carcharodus alceae;0.999999998008462;  
 MN139167;Lepidoptera;Ochlodes sylvanus;NA;0.119;Ochlodes sylvanus;0.997373902608318;  
 MN139170;Lepidoptera;Thymelicus sylvestris;NA;0.324;Thymelicus sylvestris;0.999940778442454;  
 MN139171;Lepidoptera;Plebejus argus;Plebejus argus;0.014;Plebejus argus;0.985827082916227;  
 MN139172;Lepidoptera;Ochlodes sylvanus;NA;0.316;Ochlodes sylvanus;0.996318754838625;  
 MN139173;Lepidoptera;Carcharodus alceae;Carcharodus alceae;0.999;Carcharodus alceae;0.999999998008462;  
 MN139174;Lepidoptera;Polyommatus icarus;NA;0.003;Polyommatus icarus;0.986125651677522;  
 MN139174;Lepidoptera;Polyommatus icarus;NA;0.003;Polyommatus icarus;0.986125651677522;  
 MN139175;Lepidoptera;Vanessa cardui;Vanessa cardui;1;Vanessa cardui;0.99999803450484;  
 MN139176;Lepidoptera;Melitaea didyma;NA;0.077;Melitaea didyma;0.978856953763553;

MN139178;Lepidoptera;Glaucopsyche alexis;Glaucopsyche alexis;0.001;Glaucopsyche alexis;0.94042380088325;  
MN139180;Lepidoptera;Lasiommata megera;Lasiommata megera;1;Lasiommata megera;0.999928528239676;  
MN139183;Lepidoptera;Erebia melampus;Erebia melampus;0.003;Erebia melampus;0.981722308229927;  
MN139184;Lepidoptera;Maniola tithonus;Pyronia tithonus;1;Pyronia tithonus;1;  
MN139186;Lepidoptera;Plebejus argyrognomon;NA;0.004;NA;0.998514827971857;  
MN139188;Lepidoptera;Gonepteryx cleopatra;Gonepteryx cleopatra;0.998;Gonepteryx cleopatra;0.999118636582266;  
MN139190;Lepidoptera;Colias alfacariensis;Colias alfacariensis;1;Colias alfacariensis;0.999986994131001;  
MN139191;Lepidoptera;Aricia cramera;Aricia cramera;1;Aricia cramera;0.999990463719651;  
MN139193;Lepidoptera;Polyommatus icarus;NA;0.166;Polyommatus icarus;0.749935576218847;  
MN139193;Lepidoptera;Polyommatus icarus;NA;0.166;Polyommatus icarus;0.749935576218847;  
MN139194;Lepidoptera;Issoria lathonia;Issoria lathonia;1;Issoria lathonia;0.99999999989257;  
MN139195;Lepidoptera;Polyommatus icarus;Polyommatus icarus;0.002;Polyommatus icarus;0.999716017140251;  
MN139195;Lepidoptera;Polyommatus icarus;Polyommatus icarus;0.002;Polyommatus icarus;0.999716017140251;  
MN139196;Lepidoptera;Parnassius apollo;Parnassius apollo;1;Parnassius apollo;0.994691248300955;  
MN139197;Lepidoptera;Lycaena thersamon;Lycaena thersamon;0.001;Lycaena thersamon;0.952360353045614;  
MN139199;Lepidoptera;Lycaena tityrus;Lycaena tityrus;1;Lycaena tityrus;0.999998928238034;  
MN139202;Lepidoptera;Issoria lathonia;Issoria lathonia;1;Issoria lathonia;0.99999999989257;  
MN139204;Lepidoptera;Ochlodes sylvanus;NA;0.119;Ochlodes sylvanus;0.997373902608318;  
MN139205;Lepidoptera;Hipparchia fagi;Hipparchia fagi;NA;Hipparchia fagi;0.987048294127975;  
MN139206;Lepidoptera;Melitaea diamina;NA;0.149;Melitaea diamina;0.999999996592464;  
MN139207;Lepidoptera;Colias crocea;NA;0.059;NA;0.99999999999738;  
MN139208;Lepidoptera;Fabriciana niobe;NA;0.005;Fabriciana niobe;0.992125835358755;  
MN139210;Lepidoptera;Ochlodes sylvanus;NA;0.316;Ochlodes sylvanus;0.996318754838625;  
MN139212;Lepidoptera;Anthocharis damone;Anthocharis damone;1;Anthocharis damone;0.999999991170057;  
MN139213;Lepidoptera;Erebia euryale;NA;NA;Erebia euryale;0.919518760623792;  
MN139215;Lepidoptera;Chazara briseis;Chazara briseis;1;Chazara briseis;0.999992037130752;  
MN139216;Lepidoptera;Nymphalis c-album;NA;0.215;NA;0.999999192918557;  
MN139218;Lepidoptera;Nymphalis egea;Polygonia egea;1;Polygonia egea;0.999999878357791;  
MN139219;Lepidoptera;Melitaea diamina;NA;0.001;Melitaea diamina;0.999999979350975;  
MN139221;Lepidoptera;Thymelicus lineola;Thymelicus lineola;1;Thymelicus lineola;0.999976816785769;  
MN139222;Lepidoptera;Nymphalis io;NA;0.491;Aglais io;0.930153237246992;  
MN139223;Lepidoptera;Aporia crataegi;NA;NA;Aporia crataegi;0.999998459680561;  
MN139225;Lepidoptera;Nymphalis egea;Polygonia egea;1;Polygonia egea;0.999999758078475;  
MN139226;Lepidoptera;Lasiommata maera;Lasiommata maera;1;Lasiommata maera;0.99999510792253;  
MN139227;Lepidoptera;Boloria euphrosyne;Boloria euphrosyne;0.008;Boloria euphrosyne;0.999964281413411;  
MN139229;Lepidoptera;Lasiommata megera;Lasiommata megera;1;Lasiommata megera;0.999379144055441;  
MN139230;Lepidoptera;Erebia eriphyle;Erebia eriphyle;1;Erebia eriphyle;0.99999983979336;  
MN139231;Lepidoptera;Lysandra coridon;NA;NA;Lysandra coridon;0.811340269227995;  
MN139232;Lepidoptera;Brenthis daphne;Brenthis daphne;0.011;Brenthis daphne;0.946409829233859;  
MN139233;Lepidoptera;Ochlodes sylvanus;NA;0.316;Ochlodes sylvanus;0.996318754838625;  
MN139234;Lepidoptera;Carcharodus alceae;Carcharodus alceae;0.999;Carcharodus alceae;0.99999996339511;  
MN139235;Lepidoptera;Lasiommata megera;Lasiommata megera;1;Lasiommata megera;0.999928528239676;  
MN139236;Lepidoptera;Lasiommata megera;Lasiommata megera;1;Lasiommata megera;0.999806890129977;  
MN139237;Lepidoptera;Pyrgus carthami;Pyrgus carthami;1;Pyrgus carthami;0.99998821600502;  
MN139238;Lepidoptera;Lasiommata paramegaera;Lasiommata paramegaera;0.999;Lasiommata paramegaera;0.995283446287531;  
MN139239;Lepidoptera;Ochlodes sylvanus;NA;0.316;Ochlodes sylvanus;0.996318754838625;  
MN139240;Lepidoptera;Aporia crataegi;NA;NA;Aporia crataegi;0.99998518523558;  
MN139241;Lepidoptera;Fabriciana elisa;Fabriciana elisa;0.001;Fabriciana elisa;0.991687097294013;  
MN139242;Lepidoptera;Coenonympha pamphilus;Coenonympha pamphilus;1;Coenonympha pamphilus;0.99999999999744;  
MN139244;Lepidoptera;Polyommatus icarus;Polyommatus icarus;0.001;Polyommatus icarus;0.999851522482238;  
MN139244;Lepidoptera;Polyommatus icarus;Polyommatus icarus;0.001;Polyommatus icarus;0.999851522482238;  
MN139245;Lepidoptera;Pyrgus andromedae;Pyrgus andromedae;0.001;Pyrgus andromedae;0.998828669843251;  
MN139246;Lepidoptera;Plebejus argus;NA;0.124;Plebejus argus;0.982974540879239;  
MN139247;Lepidoptera;Pyrgus malvoides;NA;0.111;Pyrgus malvoides;0.968399374774442;  
MN139249;Lepidoptera;Ochlodes sylvanus;NA;0.316;Ochlodes sylvanus;0.996318754838625;  
MN139250;Lepidoptera;Coenonympha arcania;NA;0.105;NA;0.99999999999971;  
MN139251;Lepidoptera;Hipparchia fagi;Hipparchia fagi;NA;Hipparchia fagi;0.986566456150817;  
MN139256;Lepidoptera;Brenthis hecate;NA;0.056;Brenthis hecate;0.9998033982787;  
MN139257;Lepidoptera;Erebia ottomana;Erebia ottomana;1;Erebia ottomana;0.999999991465188;  
MN139258;Lepidoptera;Polyommatus icarus;NA;0.001;Polyommatus icarus;0.981285528541973;  
MN139258;Lepidoptera;Polyommatus icarus;NA;0.001;Polyommatus icarus;0.981285528541973;  
MN139259;Lepidoptera;Anthocharis euphenoides;Anthocharis euphenoides;0.009;Anthocharis euphenoides;0.985905235113516;

MN139260;Lepidoptera;Ochlodes sylvanus;NA;0.117;Ochlodes sylvanus;0.997347010117109;  
MN139261;Lepidoptera;Plebejus idas;Plebejus idas;0.001;NA;0.999436143300552;  
MN139262;Lepidoptera;Melitaea cinxia;Melitaea cinxia;1;Melitaea cinxia;0.999999999998835;  
MN139263;Lepidoptera;Thymelicus acteon;Thymelicus acteon;1;Thymelicus acteon;0.99999999752248;  
MN139264;Lepidoptera;Polyommatus icarus;NA;0.007;Polyommatus icarus;0.999081737461227;  
MN139264;Lepidoptera;Polyommatus icarus;NA;0.007;Polyommatus icarus;0.999081737461227;  
MN139265;Lepidoptera;Coenonympha arcania;NA;0.172;Coenonympha arcania;0.963036309473038;  
MN139266;Lepidoptera;Pyrgus malvoides;NA;0.176;Pyrgus malvoides;0.940490890379026;  
MN139268;Lepidoptera;Brintesia circe;Brintesia circe;NA;Brintesia circe;0.99999894309325;  
MN139269;Lepidoptera;Coenonympha arcania;NA;0.316;NA;0.99999999999985;  
MN139270;Lepidoptera;Favonius quercus;NA;NA;Favonius quercus;0.749488008187033;  
MN139271;Lepidoptera;Erebia pronoe;Erebia pronoe;1;Erebia pronoe;0.999250891771858;  
MN139272;Lepidoptera;Cupido minimus;NA;0.006;Cupido minimus;0.999753607968986;  
MN139273;Lepidoptera;Maniola tithonus;Pyronia tithonus;1;Pyronia tithonus;1;  
MN139276;Lepidoptera;Cupido alcetas;NA;0.218;Cupido alcetas;0.833501983138177;  
MN139277;Lepidoptera;Lycaena phlaeas;Lycaena phlaeas;1;Lycaena phlaeas;0.999999996363186;  
MN139278;Lepidoptera;Lycaena hippothoe;Lycaena hippothoe;NA;Lycaena hippothoe;0.929815071946357;  
MN139279;Lepidoptera;Aricia agestis;NA;NA;Aricia agestis;0.993980512246517;  
MN139286;Lepidoptera;Satyrium ilicis;Satyrium ilicis;1;Satyrium ilicis;0.999999987901305;  
MN139283;Lepidoptera;Coenonympha pamphilus;Coenonympha pamphilus;1;Coenonympha  
pamphilus;0.99999999999744;  
MN139285;Lepidoptera;Melitaea didyma;Melitaea didyma;1;Melitaea didyma;0.999429129005203;  
MN139286;Lepidoptera;Thymelicus sylvestris;NA;0.324;Thymelicus sylvestris;0.999940778442454;  
MN139287;Lepidoptera;Erebia oeme;NA;0.114;Erebia oeme;0.999999999830635;  
MN139288;Lepidoptera;Melitaea diamina;NA;0.149;Melitaea diamina;0.999999996592464;  
MN139289;Lepidoptera;Brenthis daphne;Brenthis daphne;0.006;Brenthis daphne;0.984559944066479;  
MN139291;Lepidoptera;Pyrgus malvae;Pyrgus malvae;NA;Pyrgus malvae;0.980121140374433;  
MN139296;Lepidoptera;Melitaea cinxia;Melitaea cinxia;1;Melitaea cinxia;0.999999999998835;  
MN139297;Lepidoptera;Hipparchia hermione;NA;NA;NA;0.999999999999991;  
MN139298;Lepidoptera;Papilio machaon;Papilio machaon;NA;Papilio machaon;0.998335940984695;  
MN139299;Lepidoptera;Maniola jurtina;NA;0.108;Maniola jurtina;0.870434006715787;  
MN139300;Lepidoptera;Plebejus argus;NA;0.118;Plebejus argus;0.977297982426809;  
MN139301;Lepidoptera;Satyrium pruni;NA;0.076;Satyrium pruni;0.990322364021655;  
MN139302;Lepidoptera;Anthocharis euphenoides;Anthocharis euphenoides;0.006;Anthocharis  
euphenoides;0.984813140103259;  
MN139303;Lepidoptera;Colias crocea;NA;0.059;NA;0.999999999999738;  
MN139304;Lepidoptera;Gegenes nostrodamus;Gegenes nostrodamus;1;Gegenes  
nostrodamus;0.9999999996883645;  
MN139305;Lepidoptera;Thymelicus acteon;Thymelicus acteon;1;Thymelicus acteon;0.99999999752248;  
MN139307;Lepidoptera;Brenthis ino;Brenthis ino;0.003;Brenthis ino;0.98906191156141;  
MN139308;Lepidoptera;Maniola tithonus;Pyronia tithonus;NA;Pyronia tithonus;1;  
MN139310;Lepidoptera;Plebejus idas;NA;0.007;NA;0.999546324331549;  
MN139311;Lepidoptera;Boloria euphrosyne;Boloria euphrosyne;1;Boloria  
euphrosyne;0.999998365644188;  
MN139312;Lepidoptera;Pyrgus armoricanus;Pyrgus armoricanus;1;Pyrgus  
armoricanus;0.999997353848817;  
MN139313;Lepidoptera;Thymelicus sylvestris;Thymelicus sylvestris;1;Thymelicus  
sylvestris;0.999999985935205;  
MN139314;Lepidoptera;Lycaena dispar;Lycaena dispar;1;Lycaena dispar;0.999999994053013;  
MN139315;Lepidoptera;Pyrgus malvoides;NA;0.016;Pyrgus malvoides;0.878050137245322;  
MN139316;Lepidoptera;Charaxes jasius;Charaxes jasius;NA;Charaxes jasius;0.990397821479112;  
MN139317;Lepidoptera;Maniola jurtina;NA;0.012;Maniola jurtina;0.91755716175482;  
MN139319;Lepidoptera;Aricia agestis;NA;0.067;Aricia agestis;0.999509743227786;  
MN139322;Lepidoptera;Erebia euryale;NA;NA;Erebia euryale;0.919518760623792;  
MN139323;Lepidoptera;Plebejus argyrognomon;NA;0.001;NA;0.994620093546684;  
MN139324;Lepidoptera;Plebejus argus;Plebejus argus;0.019;Plebejus argus;0.974059310897195;  
MN139325;Lepidoptera;Melanargia galathea;Melanargia galathea;NA;Melanargia  
galathea;0.959429932872284;  
MN139326;Lepidoptera;Aglais urticae;NA;0.001;Aglais urticae;0.983623896759349;  
MN139328;Lepidoptera;Vanessa cardui;Vanessa cardui;1;Vanessa cardui;0.999999459983318;  
MN139329;Lepidoptera;Cercyonis lupina;Hyponephele lupina;1;Hyponephele lupina;0.99999940565518;  
MN139332;Lepidoptera;Lampides boeticus;Lampides boeticus;1;Lampides boeticus;0.99999999545906;  
MN139333;Lepidoptera;Aporia crataegi;NA;NA;Aporia crataegi;0.999998518523558;  
MN139334;Lepidoptera;Maniola jurtina;NA;0.003;Maniola jurtina;0.934943936861184;  
MN139335;Lepidoptera;Maniola jurtina;NA;0.038;NA;0.99999999999524;  
MN139336;Lepidoptera;Aglais urticae;Aglais urticae;0.999;Aglais urticae;0.994120587202935;  
MN139337;Lepidoptera;Pyrgus carthami;Pyrgus carthami;1;Pyrgus carthami;0.999995592447668;  
MN139339;Lepidoptera;Coenonympha oedippus;Coenonympha oedippus;1;Coenonympha  
oedippus;0.999999999999432;  
MN139341;Lepidoptera;Polyommatus dolus;Polyommatus dolus;0.001;Polyommatus  
dolus;0.945738812333627;  
MN139344;Lepidoptera;Boloria euphrosyne;Boloria euphrosyne;1;Boloria  
euphrosyne;0.99999754214146;  
MN139345;Lepidoptera;Lasiommata megera;Lasiommata megera;1;Lasiommata megera;0.999379144055441;  
MN139346;Lepidoptera;Maniola jurtina;NA;0.012;Maniola jurtina;0.91755716175482;  
MN139347;Lepidoptera;Plebejus idas;NA;0.007;NA;0.999546324331549;  
MN139348;Lepidoptera;Plebejus argyrognomon;NA;0.001;NA;0.998518811781132;  
MN139349;Lepidoptera;Erynnis tages;Erynnis tages;1;Erynnis tages;0.999999281987018;

MN139351;Lepidoptera;Pyrgus andromedae;Pyrgus andromedae;0.001;Pyrgus andromedae;0.997448239493065;  
MN139353;Lepidoptera;Cupido argiades;NA;0.173;Cupido argiades;0.80102807497701;  
MN139354;Lepidoptera;Aglais urticae;Aglais urticae;0.003;Aglais urticae;0.987698041564968;  
MN139355;Lepidoptera;Euphydryas cynthia;Euphydryas cynthia;1;Euphydryas cynthia;0.99999999705039;  
MN139356;Lepidoptera;Anthocharis cardamines;Anthocharis cardamines;1;Anthocharis cardamines;0.999999986709838;  
MN139357;Lepidoptera;Carcharodus alceae;Carcharodus alceae;1;Carcharodus alceae;0.99999998465938;  
MN139358;Lepidoptera;Hipparchia hermione;Hipparchia hermione;NA;Hipparchia hermione;0.74525153929477;  
MN139359;Lepidoptera;Agriades orbitulus;NA;0.01;Agriades orbitulus;0.998991302227708;  
MN139362;Lepidoptera;Celastrina argiolus;Celastrina argiolus;1;Celastrina argiolus;0.999037794018796;  
MN139363;Lepidoptera;Maniola jurtina;NA;0.038;NA;0.99999999999524;  
MN139364;Lepidoptera;Plebejus argyrognomon;NA;0.001;NA;0.994620093546684;  
MN139366;Lepidoptera;Nymphalis egea;Polygonia egea;1;Polygonia egea;0.999999758078475;  
MN139369;Lepidoptera;Issoria lathonia;Issoria lathonia;1;Issoria lathonia;0.99999999989257;  
MN139370;Lepidoptera;Ochlodes sylvanus;NA;0.316;Ochlodes sylvanus;0.996318754838625;  
MN139371;Lepidoptera;Thymelicus lineola;Thymelicus lineola;1;Thymelicus lineola;0.999995927238524;  
MN139374;Lepidoptera;Hipparchia semele;NA;0.001;Hipparchia semele;0.868056708468869;  
MN139375;Lepidoptera;Colias hyale;Colias hyale;0.015;Colias hyale;0.999997884296128;  
MN139376;Lepidoptera;Favonius quercus;NA;NA;Favonius quercus;0.791633840981009;  
MN139377;Lepidoptera;Melitaea cinxia;Melitaea cinxia;1;Melitaea cinxia;0.99999999999801;  
MN139378;Lepidoptera;Nymphalis c-album;NA;0.215;NA;0.999999192918557;  
MN139379;Lepidoptera;Celastrina argiolus;Celastrina argiolus;1;Celastrina argiolus;0.999527385150531;  
MN139380;Lepidoptera;Arethusana arethusana;NA;0.064;Arethusana arethusana;0.999932923751678;  
MN139382;Lepidoptera;Thymelicus lineola;Thymelicus lineola;1;Thymelicus lineola;0.999995384857434;  
MN139383;Lepidoptera;Boloria euphrosyne;Boloria euphrosyne;1;Boloria euphrosyne;0.999999450156461;  
MN139384;Lepidoptera;Pyrgus malvae;Pyrgus malvae;0.999;Pyrgus malvae;0.993531783407179;  
MN139387;Lepidoptera;Lycaena virgaureae;NA;0.089;Lycaena virgaureae;0.999665201081283;  
MN139389;Lepidoptera;Melitaea cinxia;Melitaea cinxia;1;Melitaea cinxia;0.99999999999829;  
MN139390;Lepidoptera;Ochlodes sylvanus;NA;0.316;Ochlodes sylvanus;0.996318754838625;  
MN139392;Lepidoptera;Melitaea cinxia;Melitaea cinxia;1;Melitaea cinxia;0.99999999998721;  
MN139393;Lepidoptera;Pyrgus andromedae;Pyrgus andromedae;0.001;Pyrgus andromedae;0.998828669843251;  
MN139396;Lepidoptera;Hipparchia semele;NA;NA;Hipparchia semele;0.86892676007213;  
MN139397;Lepidoptera;Cupido minimus;NA;0.019;Cupido minimus;0.999739809346213;  
MN139398;Lepidoptera;Gonepteryx cleopatra;Gonepteryx cleopatra;0.998;Gonepteryx cleopatra;0.999118636582266;  
MN139399;Lepidoptera;Carcharodus alceae;Carcharodus alceae;0.999;Carcharodus alceae;0.99999996339511;  
MN139401;Lepidoptera;Melitaea trivia;Melitaea trivia;1;Melitaea trivia;0.999999999960437;  
MN139402;Lepidoptera;Fabriciana elisa;Fabriciana elisa;0.001;Fabriciana elisa;0.994839902224823;  
MN139403;Lepidoptera;Aglais urticae;NA;0.002;Aglais urticae;0.987497593219019;  
MN139404;Lepidoptera;Glaucopsyche alexis;Glaucopsyche alexis;0.001;Glaucopsyche alexis;0.94042380088325;  
MN139405;Lepidoptera;Coenonympha pamphilus;Coenonympha pamphilus;1;Coenonympha pamphilus;0.99999999999744;  
MN139406;Lepidoptera;Nymphalis c-album;NA;0.215;NA;0.999999192918557;  
MN139407;Lepidoptera;Satyrium w-album;NA;0.056;Satyrium w-album;0.989378230996316;  
MN139408;Lepidoptera;Melitaea cinxia;Melitaea cinxia;1;Melitaea cinxia;0.99999999999801;  
MN139409;Lepidoptera;Fabriciana adippe;NA;NA;Fabriciana adippe;0.900255826442102;  
MN139411;Lepidoptera;Polyommatus celina;Polyommatus celina;0.007;Polyommatus celina;0.99999999839019;  
MN139413;Lepidoptera;Aricia agestis;NA;0.253;Aricia agestis;0.996350017387504;  
MN139414;Lepidoptera;Coenonympha arcania;NA;0.047;Coenonympha arcania;0.819452108223873;  
MN139415;Lepidoptera;Fabriciana adippe;Fabriciana adippe;0.003;Fabriciana adippe;0.994298341064395;  
MN139416;Lepidoptera;Maniola jurtina;NA;NA;NA;0.9999999985062;  
MN139419;Lepidoptera;Pieris napi;NA;0.011;Pieris napi;0.801985394724814;  
MN139420;Lepidoptera;Apatura ilia;NA;0.165;Apatura ilia;0.956796812031481;  
MN139421;Lepidoptera;Maniola jurtina;NA;0.001;Maniola jurtina;0.939220105860875;  
MN139422;Lepidoptera;Coenonympha pamphilus;Coenonympha pamphilus;1;Coenonympha pamphilus;0.99999999999744;  
MN139423;Lepidoptera;Hamearis lucina;NA;NA;Hamearis lucina;0.999999999962824;  
MN139424;Lepidoptera;Cupido argiades;NA;0.499;NA;0.99999999984682;  
MN139425;Lepidoptera;Erebia euryale;NA;NA;Erebia euryale;0.948790417707171;  
MN139426;Lepidoptera;Anthocharis cardamines;Anthocharis cardamines;1;Anthocharis cardamines;0.99999984875757;  
MN139427;Lepidoptera;Coenonympha pamphilus;Coenonympha pamphilus;1;Coenonympha pamphilus;0.99999999999744;  
MN139428;Lepidoptera;Ochlodes sylvanus;NA;0.119;Ochlodes sylvanus;0.997373902608318;

MN139429;Lepidoptera;Maniola jurtina;NA;NA;NA;0.99999999985062;  
MN139431;Lepidoptera;Fabriciana adippe;NA;NA;Fabriciana adippe;0.900255826442102;  
MN139432;Lepidoptera;Thymelicus lineola;Thymelicus lineola;1;Thymelicus  
lineola;0.999971535093703;  
MN139433;Lepidoptera;Hipparchia semele;NA;NA;Hipparchia semele;0.748345401572611;  
MN139434;Lepidoptera;Callophrys rubi;NA;0.002;Callophrys rubi;0.998841790162773;  
MN139435;Lepidoptera;Coenonympha oedippus;Coenonympha oedippus;1;Coenonympha  
oedippus;0.99999999976467;  
MN139437;Lepidoptera;Thymelicus acteon;Thymelicus acteon;1;Thymelicus acteon;0.99999999752248;  
MN139438;Lepidoptera;Ochlodes sylvanus;NA;0.316;Ochlodes sylvanus;0.996318754838625;  
MN139440;Lepidoptera;Lycaena hippothoe;NA;NA;Lycaena hippothoe;0.928973453460131;  
MN139441;Lepidoptera;Agriades optilete;Agriades optilete;1;Agriades optilete;0.99999995660511;  
MN139442;Lepidoptera;Coenonympha gardetta;NA;0.12;NA;0.99999999999993;  
MN139444;Lepidoptera;Erebia pharte;Erebia pharte;1;Erebia pharte;0.99999999630495;  
MN139445;Lepidoptera;Plebejus argyrognomon;NA;0.004;NA;0.997919811835919;  
MN139446;Lepidoptera;Cupido minimus;NA;0.009;Cupido minimus;0.999791453712643;  
MN139447;Lepidoptera;Pyrgus malvoides;NA;0.176;Pyrgus malvoides;0.940490890379026;  
MN139452;Lepidoptera;Cyaniris semiargus;NA;NA;Cyaniris semiargus;0.999051841766953;  
MN139453;Lepidoptera;Polyommatus icarus;NA;0.004;Polyommatus icarus;0.963846856760863;  
MN139454;Lepidoptera;Vanessa cardui;Vanessa cardui;1;Vanessa cardui;0.999999459983318;  
MN139455;Lepidoptera;Coenonympha arcania;NA;0.172;Coenonympha arcania;0.963036309473038;  
MN139456;Lepidoptera;Lycaena phlaeas;Lycaena phlaeas;1;Lycaena phlaeas;0.99999996363186;  
MN139457;Lepidoptera;Pyrgus malvoides;NA;0.052;Pyrgus malvoides;0.943208768333892;  
MN139458;Lepidoptera;Argynnis aglaja;NA;0.007;Speyeria aglaja;0.806162363046318;  
MN139459;Lepidoptera;Aricia cramera;Aricia cramera;1;Aricia cramera;0.999993731037033;  
MN139460;Lepidoptera;Coenonympha pamphilus;Coenonympha pamphilus;1;Coenonympha  
pamphilus;0.99999999999744;  
MN139462;Lepidoptera;Plebejus idas;Plebejus idas;0.001;NA;0.999655983096466;  
MN139463;Lepidoptera;Iolana iolas;Iolana iolas;1;Iolana iolas;0.999999046251105;  
MN139464;Lepidoptera;Pyrgus carlinae;NA;NA;Pyrgus carlinae;0.854199018204849;  
MN139465;Lepidoptera;Gonepteryx cleopatra;Gonepteryx cleopatra;0.998;Gonepteryx  
cleopatra;0.999118636582266;  
MN139466;Lepidoptera;Lysandra coridon;NA;NA;NA;0.997904753762663;  
MN139467;Lepidoptera;Thymelicus lineola;Thymelicus lineola;1;Thymelicus  
lineola;0.999995927238524;  
MN139469;Lepidoptera;Erebia tyndarus;NA;NA;NA;0.999999999999923;  
MN139471;Lepidoptera;Aporia crataegi;NA;NA;Aporia crataegi;0.999998459680561;  
MN139472;Lepidoptera;Apatura ilia;NA;0.165;Apatura ilia;0.956796812031481;  
MN139473;Lepidoptera;Coenonympha gardetta;NA;0.001;Coenonympha gardetta;0.731095812176462;  
MN139474;Lepidoptera;Euphydryas aurinia;Euphydryas aurinia;0.017;Euphydryas  
aurinia;0.997183742560994;  
MN139478;Lepidoptera;Thymelicus sylvestris;Thymelicus sylvestris;1;Thymelicus  
sylvestris;0.999999985935205;  
MN139479;Lepidoptera;Cupido argiades;NA;0.499;NA;0.999999999984682;  
MN139480;Lepidoptera;Aricia agestis;NA;0.253;Aricia agestis;0.996350017387504;  
MN139481;Lepidoptera;Gonepteryx cleopatra;Gonepteryx cleopatra;0.998;Gonepteryx  
cleopatra;0.999118636582266;  
MN139483;Lepidoptera;Polyommatus amandus;Polyommatus amandus;0.002;Polyommatus  
amandus;0.99998879592523;  
MN139484;Lepidoptera;Issoria lathonia;Issoria lathonia;1;Issoria lathonia;0.999999999994344;  
MN139486;Lepidoptera;Cyaniris semiargus;Cyaniris semiargus;NA;Cyaniris  
semiargus;0.999815796556651;  
MN139488;Lepidoptera;Brenthis daphne;Brenthis daphne;0.001;Brenthis daphne;0.998360260866441;  
MN139489;Lepidoptera;Aricia cramera;Aricia cramera;1;Aricia cramera;0.99994899228873;  
MN139490;Lepidoptera;Favonius quercus;NA;NA;Favonius quercus;0.73046069582187;  
MN139491;Lepidoptera;Melitaea didyma;Melitaea didyma;1;Melitaea didyma;0.999937162819573;  
MN139494;Lepidoptera;Chazara briseis;Chazara briseis;1;Chazara briseis;0.999980393060755;  
MN139496;Lepidoptera;Coenonympha oedippus;Coenonympha oedippus;1;Coenonympha  
oedippus;0.99999999999946;  
MN139498;Lepidoptera;Lycaena tityrus;Lycaena tityrus;1;Lycaena tityrus;0.999998928238034;  
MN139499;Lepidoptera;Plebejus idas;NA;0.007;NA;0.999546324331549;  
MN139500;Lepidoptera;Aricia agestis;NA;0.067;Aricia agestis;0.999509743227786;  
MN139501;Lepidoptera;Lycaena hippothoe;NA;NA;Lycaena hippothoe;0.96171722036274;  
MN139502;Lepidoptera;Issoria lathonia;Issoria lathonia;1;Issoria lathonia;0.99999999989257;  
MN139504;Lepidoptera;Polyommatus icarus;NA;0.007;Polyommatus icarus;0.999081737461227;  
MN139504;Lepidoptera;Polyommatus icarus;NA;0.007;Polyommatus icarus;0.999081737461227;  
MN139505;Lepidoptera;Maniola nurag;Maniola nurag;1;Maniola nurag;0.94592398344326;  
MN139506;Lepidoptera;Aricia cramera;Aricia cramera;1;Aricia cramera;0.999993731037033;  
MN139507;Lepidoptera;Argynnis aglaja;NA;NA;NA;0.999999999998051;  
MN139508;Lepidoptera;Gonepteryx rhamni;NA;0.474;Gonepteryx rhamni;0.982076396127858;  
MN139511;Lepidoptera;Apatura iris;Apatura iris;1;Apatura iris;0.999999999999972;  
MN139512;Lepidoptera;Aricia agestis;NA;0.216;Aricia agestis;0.998446013113235;  
MN139514;Lepidoptera;Maniola tithonus;Pyronia tithonus;1;Pyronia tithonus;1;  
MN139515;Lepidoptera;Cupido minimus;NA;0.003;Cupido minimus;0.999878204579428;  
MN139516;Lepidoptera;Parnassius apollo;Parnassius apollo;1;Parnassius apollo;0.992704703916692;  
MN139518;Lepidoptera;Lycaena dispar;Lycaena dispar;1;Lycaena dispar;0.99999990743959;

MN139519;Lepidoptera;Polyommatus dorylas;Polyommatus dorylas;0.008;Polyommatus dorylas;0.991281865899703;  
MN139520;Lepidoptera;Satyrium pruni;NA;0.076;Satyrium pruni;0.990322364021655;  
MN139521;Lepidoptera;Lasiommata megera;Lasiommata megera;1;Lasiommata megera;0.999928528239676;  
MN139522;Lepidoptera;Euphydryas aurinia;NA;0.31;Euphydryas aurinia;0.993387708761386;  
MN139523;Lepidoptera;Celastrina argiolus;Celastrina argiolus;1;Celastrina argiolus;0.999527385150531;  
MN139524;Lepidoptera;Chazara briseis;Chazara briseis;0.001;Chazara briseis;0.999987492373468;  
MN139525;Lepidoptera;Hipparchia blachieri;NA;0.004;Hipparchia semele;0.783011492754646;  
MN139526;Lepidoptera;Boloria titania;Boloria titania;1;Boloria titania;0.999958713201422;  
MN139527;Lepidoptera;Lycaena tityrus;Lycaena tityrus;1;Lycaena tityrus;0.999998928238034;  
MN139529;Lepidoptera;Maniola tithonus;Pyronia tithonus;1;Pyronia tithonus;1;  
MN139530;Lepidoptera;Thymelicus lineola;Thymelicus lineola;1;Thymelicus lineola;0.999995927238524;  
MN139533;Lepidoptera;Aricia agestis;NA;0.037;Aricia agestis;0.998710695905853;  
MN139536;Lepidoptera;Lasiommata megera;Lasiommata megera;1;Lasiommata megera;0.999379144055441;  
MN139537;Lepidoptera;Pyrgus malvae;Pyrgus malvae;NA;Pyrgus malvae;0.985600926823364;  
MN139538;Lepidoptera;Glaucopsyche alexis;Glaucopsyche alexis;0.001;Glaucopsyche alexis;0.94042380088325;  
MN139539;Lepidoptera;Plebejus argus;NA;0.036;Plebejus argus;0.988160277018267;  
MN139540;Lepidoptera;Thecla betulae;Thecla betulae;1;Thecla betulae;0.99999999972886;  
MN139541;Lepidoptera;Polyommatus amandus;Polyommatus amandus;0.006;Polyommatus amandus;0.999981460994076;  
MN139544;Lepidoptera;Erebia melampus;Erebia melampus;0.001;Erebia melampus;0.991704985968506;  
MN139545;Lepidoptera;Boloria euphrosyne;Boloria euphrosyne;1;Boloria euphrosyne;0.999999349564162;  
MN139548;Lepidoptera;Polyommatus dorylas;Polyommatus dorylas;0.008;Polyommatus dorylas;0.991281865899703;  
MN139550;Lepidoptera;Boloria euphrosyne;Boloria euphrosyne;0.001;Boloria euphrosyne;0.999988342496913;  
MN139551;Lepidoptera;Polyommatus dolus;Polyommatus dolus;0.997;Polyommatus dolus;0.955195871823379;  
MN139552;Lepidoptera;Satyrium w-album;NA;0.056;Satyrium w-album;0.989378230996316;  
MN139553;Lepidoptera;Colias alfacariensis;Colias alfacariensis;0.001;Colias alfacariensis;0.999926026317526;  
MN139554;Lepidoptera;Carcharodus alceae;Carcharodus alceae;1;Carcharodus alceae;0.99999998465938;  
MN139555;Lepidoptera;Plebejus idas;NA;0.007;NA;0.999546324331549;  
MN139557;Lepidoptera;Aglais urticae;NA;0.002;Aglais urticae;0.987497593219019;  
MN139558;Lepidoptera;Brenthis ino;Brenthis ino;0.002;Brenthis ino;0.99842931627954;  
MN139559;Lepidoptera;Maniola jurtina;NA;0.001;Maniola jurtina;0.939220105860875;  
MN139560;Lepidoptera;Pyrgus warrenensis;NA;NA;Pyrgus warrenensis;0.765902945204032;  
MN139562;Lepidoptera;Hipparchia fagi;NA;NA;Hipparchia fagi;0.958291584360022;  
MN139563;Lepidoptera;Lasiommata megera;Lasiommata megera;1;Lasiommata megera;0.999379144055441;  
MN139565;Lepidoptera;Euphydryas aurinia;NA;0.16;Euphydryas aurinia;0.991721078690876;  
MN139566;Lepidoptera;Coenonympha pamphilus;Coenonympha pamphilus;1;Coenonympha pamphilus;0.99999999999545;  
MN139567;Lepidoptera;Papilio machaon;Papilio machaon;0.003;Papilio machaon;0.997288237409893;  
MN139570;Lepidoptera;Brintesia circe;Brintesia circe;1;Brintesia circe;0.99999951254154;  
MN139571;Lepidoptera;Boloria selene;NA;0.275;Boloria selene;0.999999702697396;  
MN139572;Lepidoptera;Brintesia circe;Brintesia circe;1;Brintesia circe;0.999999924576204;  
MN139573;Lepidoptera;Coenonympha glycerion;NA;0.264;Coenonympha glycerion;0.999998370144304;  
MN139574;Lepidoptera;Thymelicus sylvestris;NA;0.324;Thymelicus sylvestris;0.999940778442454;  
MN139575;Lepidoptera;Papilio machaon;Papilio machaon;0.002;Papilio machaon;0.99964655301485;  
MN139576;Lepidoptera;Pyrgus alveus;NA;NA;NA;0.999999999995496;  
MN139578;Lepidoptera;Hipparchia fagi;Hipparchia fagi;NA;Hipparchia fagi;0.99333095914904;  
MN139579;Lepidoptera;Apatura ilia;NA;0.165;Apatura ilia;0.956796812031481;  
MN139580;Lepidoptera;Polyommatus dolus;Polyommatus dolus;0.004;Polyommatus dolus;0.876833853168453;  
MN139582;Lepidoptera;Erebia oeme;NA;0.114;Erebia oeme;0.99999999830635;  
MN139583;Lepidoptera;Anthocharis cardamines;Anthocharis cardamines;1;Anthocharis cardamines;0.99999805933546;  
MN139584;Lepidoptera;Melitaea didyma;Melitaea didyma;1;Melitaea didyma;0.999870115406424;  
MN139585;Lepidoptera;Brenthis daphne;Brenthis daphne;0.006;Brenthis daphne;0.984559944066479;  
MN139586;Lepidoptera;Thymelicus lineola;Thymelicus lineola;1;Thymelicus lineola;0.99997716763366;  
MN139589;Lepidoptera;Pieris napi;NA;0.011;Pieris napi;0.887274591866313;  
MN139590;Lepidoptera;Brenthis ino;Brenthis ino;1;Brenthis ino;0.999575084556096;  
MN139591;Lepidoptera;Aporia crataegi;NA;0.003;Aporia crataegi;0.999999100143817;  
MN139592;Lepidoptera;Anthocharis cardamines;Anthocharis cardamines;1;Anthocharis cardamines;0.9999995961909;  
MN139593;Lepidoptera;Colias hyale;Colias hyale;0.015;Colias hyale;0.999997884296128;  
MN139594;Lepidoptera;Maniola jurtina;NA;0.001;Maniola jurtina;0.939220105860875;  
MN139595;Lepidoptera;Glaucopsyche alexis;Glaucopsyche alexis;0.001;Glaucopsyche alexis;0.963789545207295;  
MN139597;Lepidoptera;Pieris napi;NA;0.011;Pieris napi;0.801985394724814;  
MN139598;Lepidoptera;Colias hyale;Colias hyale;0.015;Colias hyale;0.999997884296128;  
MN139599;Lepidoptera;Maniola jurtina;NA;NA;NA;0.99999999991;

MN139600;Lepidoptera;Minois dryas;NA;0.025;Minois dryas;0.850746026247397;  
 MN139601;Lepidoptera;Polyommatus icarus;NA;0.166;Polyommatus icarus;0.749935576218847;  
 MN139601;Lepidoptera;Polyommatus icarus;NA;0.166;Polyommatus icarus;0.749935576218847;  
 MN139602;Lepidoptera;Vanessa atalanta;Vanessa atalanta;1;Vanessa atalanta;0.999999998973152;  
 MN139604;Lepidoptera;Gegenes nostrodamus;Gegenes nostrodamus;1;Gegenes  
 nostrodamus;0.999999996883645;  
 MN139607;Lepidoptera;Argynnis aglaja;NA;NA;NA;0.99999999998051;  
 MN139608;Lepidoptera;Colias hyale;Colias hyale;0.015;Colias hyale;0.999997884296128;  
 MN139609;Lepidoptera;Coenonympha arcania;NA;0.037;Coenonympha gardetta;0.702268810129899;  
 MN139610;Lepidoptera;Callophrys rubi;NA;0.001;Callophrys rubi;0.99870518510598;  
 MN139611;Lepidoptera;Erebia euryale;NA;NA;Erebia euryale;0.90919204573005;  
 MN139612;Lepidoptera;Coenonympha pamphilus;Coenonympha pamphilus;1;Coenonympha  
 pamphilus;0.99999999999545;  
 MN139613;Lepidoptera;Brintesia circe;Brintesia circe;NA;Brintesia circe;0.99999894309325;  
 MN139614;Lepidoptera;Pyrgus carthami;Pyrgus carthami;1;Pyrgus carthami;0.999998997209607;  
 MN139615;Lepidoptera;Anthocharis cardamines;Anthocharis cardamines;1;Anthocharis  
 cardamines;0.99999982121466;  
 MN139616;Lepidoptera;Brenthis daphne;Brenthis daphne;1;Brenthis daphne;0.998584732066774;  
 MN139618;Lepidoptera;Maniola jurtina;NA;0.012;Maniola jurtina;0.91755716175482;  
 MN139619;Lepidoptera;Polyommatus icarus;NA;0.13;Polyommatus icarus;0.979762695748748;  
 MN139619;Lepidoptera;Polyommatus icarus;NA;0.13;Polyommatus icarus;0.979762695748748;  
 MN139620;Lepidoptera;Melitaea diamina;Melitaea diamina;0.002;Melitaea diamina;0.99999985187884;  
 MN139622;Lepidoptera;Maniola cecilia;Pyronia cecilia;1;Pyronia cecilia;1;  
 MN139624;Lepidoptera;Ochlodes sylvanus;NA;0.316;Ochlodes sylvanus;0.996318754838625;  
 MN139625;Lepidoptera;Pyrgus malvoides;NA;0.168;Pyrgus malvoides;0.939641056696634;  
 MN139626;Lepidoptera;Pyrgus armoricanus;Pyrgus armoricanus;1;Pyrgus  
 armoricanus;0.99997353848817;  
 MN139627;Lepidoptera;Callophrys rubi;NA;0.019;Callophrys rubi;0.998201459637982;  
 MN139628;Lepidoptera;Polyommatus celina;NA;0.072;Polyommatus celina;0.99999999953559;  
 MN139629;Lepidoptera;Pieris napi;NA;0.011;Pieris napi;0.801985394724814;  
 MN139630;Lepidoptera;Melitaea varia;Melitaea varia;1;Melitaea varia;0.999998939515614;  
 MN139631;Lepidoptera;Lysandra coridon;Lysandra coridon;NA;NA;0.99554973499116;  
 MN139632;Lepidoptera;Vanessa cardui;Vanessa cardui;1;Vanessa cardui;0.99999459983318;  
 MN139633;Lepidoptera;Cupido alcetas;NA;0.218;Cupido alcetas;0.833501983138177;  
 MN139635;Lepidoptera;Fabriciana niobe;NA;0.009;Fabriciana niobe;0.989552124216525;  
 MN139636;Lepidoptera;Satyrium esculi;Satyrium esculi;1;Satyrium esculi;0.99999957367948;  
 MN139637;Lepidoptera;Gegenes nostrodamus;Gegenes nostrodamus;1;Gegenes  
 nostrodamus;0.999999996883645;  
 MN139639;Lepidoptera;Lasiommata maera;Lasiommata maera;1;Lasiommata maera;0.99999677384159;  
 MN139640;Lepidoptera;Thymelicus lineola;Thymelicus lineola;1;Thymelicus  
 lineola;0.999995927238524;  
 MN139641;Lepidoptera;Erynnis tages;Erynnis tages;1;Erynnis tages;0.999999281987018;  
 MN139642;Lepidoptera;Hipparchia semele;NA;NA;Hipparchia semele;0.860254543558736;  
 MN139643;Lepidoptera;Polyommatus dolus;Polyommatus dolus;0.997;Polyommatus  
 dolus;0.955195871823379;  
 MN139644;Lepidoptera;Melitaea diamina;NA;0.149;Melitaea diamina;0.999999996592464;  
 MN139646;Lepidoptera;Erebia medusa;NA;0.01;Erebia medusa;0.979621232162315;  
 MN139648;Lepidoptera;Fabriciana adippe;Fabriciana adippe;0.007;Fabriciana  
 adippe;0.876018745965171;  
 MN139650;Lepidoptera;Melanargia galathea;Melanargia galathea;NA;Melanargia  
 galathea;0.959429932872284;  
 MN139652;Lepidoptera;Euphydryas aurinia;NA;0.001;Euphydryas aurinia;0.984636740722975;  
 MN139653;Lepidoptera;Aporia crataegi;NA;NA;Aporia crataegi;0.999996781126733;  
 MN139654;Lepidoptera;Erebia scipio;Erebia scipio;1;Erebia scipio;0.99999995588723;  
 MN139655;Lepidoptera;Brenthis daphne;Brenthis daphne;0.001;Brenthis daphne;0.997781825264304;  
 MN139659;Lepidoptera;Ochlodes sylvanus;NA;0.316;Ochlodes sylvanus;0.996318754838625;  
 MN139660;Lepidoptera;Coenonympha corinna;Coenonympha corinna;1;Coenonympha  
 corinna;0.99999999974449;  
 MN139661;Lepidoptera;Maniola jurtina;NA;0.012;Maniola jurtina;0.91755716175482;  
 MN139662;Lepidoptera;Coenonympha dorus;Coenonympha dorus;1;Coenonympha dorus;0.9999999983973;  
 MN139663;Lepidoptera;Erynnis tages;Erynnis tages;1;Erynnis tages;0.99999253822119;  
 MN139664;Lepidoptera;Gonepteryx rhamni;NA;0.192;Gonepteryx rhamni;0.991002175992451;  
 MN139667;Lepidoptera;Pyrgus cacaliae;Pyrgus cacaliae;0.999;Pyrgus cacaliae;0.99258001670677;  
 MN139668;Lepidoptera;Erebia pharte;Erebia pharte;1;Erebia pharte;0.9999999630495;  
 MN139669;Lepidoptera;Callophrys rubi;NA;0.001;Callophrys rubi;0.99870518510598;  
 MN139670;Lepidoptera;Hipparchia neapolitana;NA;0.001;Hipparchia semele;0.802446092830354;  
 MN139671;Lepidoptera;Lampides boeticus;Lampides boeticus;1;Lampides boeticus;0.99999999545906;  
 MN139674;Lepidoptera;Thymelicus lineola;Thymelicus lineola;1;Thymelicus  
 lineola;0.999971535093703;  
 MN139675;Lepidoptera;Thymelicus acteon;Thymelicus acteon;1;Thymelicus acteon;0.9999999752248;  
 MN139676;Lepidoptera;Pyrgus armoricanus;Pyrgus armoricanus;1;Pyrgus  
 armoricanus;0.99997353848817;  
 MN139678;Lepidoptera;Lycaena alciphron;Lycaena alciphron;1;Lycaena alciphron;0.99999934247401;  
 MN139679;Lepidoptera;Aricia agestis;NA;0.067;Aricia agestis;0.999509743227786;  
 MN139680;Lepidoptera;Melitaea cinxia;NA;0.344;Melitaea cinxia;0.9999999998636;  
 MN139681;Lepidoptera;Coenonympha pamphilus;Coenonympha pamphilus;1;Coenonympha  
 pamphilus;0.99999999999744;  
 MN139682;Lepidoptera;Erebia epiphron;NA;NA;Erebia epiphron;0.991535930833796;

MN139683;Lepidoptera;Hipparchia hermione;NA;NA;NA;0.999999999999991;  
MN139686;Lepidoptera;Polyommatus dorylas;NA;0.002;Polyommatus dorylas;0.992103989657325;  
MN139687;Lepidoptera;Erebia euryale;NA;NA;Erebia euryale;0.920428872281508;  
MN139688;Lepidoptera;Ochlodes sylvanus;NA;0.316;Ochlodes sylvanus;0.996318754838625;  
MN139689;Lepidoptera;Glaucopsyche alexis;NA;NA;Glaucopsyche alexis;0.991019528246159;  
MN139691;Lepidoptera;Erebia euryale;NA;NA;Erebia euryale;0.919518760623792;  
MN139692;Lepidoptera;Cyaniris semiargus;Cyaniris semiargus;NA;Cyaniris  
semiargus;0.999795734354061;  
MN139693;Lepidoptera;Callophrys rubi;NA;0.009;Callophrys rubi;0.996560650629412;  
MN139697;Lepidoptera;Favonius quercus;NA;0.021;Favonius quercus;0.742525423285576;  
MN139698;Lepidoptera;Satyrium spini;Satyrium spini;1;Satyrium spini;0.99999721054916;  
MN139699;Lepidoptera;Maniola jurtina;NA;NA;NA;0.9999999985062;  
MN139700;Lepidoptera;Lasionommata megera;Lasionommata megera;1;Lasionommata megera;0.999928528239676;  
MN139703;Lepidoptera;Cyaniris semiargus;Cyaniris semiargus;NA;Cyaniris  
semiargus;0.999795734354061;  
MN139704;Lepidoptera;Brintesia circe;Brintesia circe;1;Brintesia circe;0.999997995192124;  
MN139705;Lepidoptera;Lycaena tityrus;Lycaena tityrus;1;Lycaena tityrus;0.999998928238034;  
MN139706;Lepidoptera;Lasionommata maera;Lasionommata maera;1;Lasionommata maera;0.99999510792253;  
MN139707;Lepidoptera;Satyrus actaea;Satyrus actaea;0.01;Satyrus actaea;0.94366382029787;  
MN139708;Lepidoptera;Brenthis daphne;Brenthis daphne;0.006;Brenthis daphne;0.984559944066479;  
MN139709;Lepidoptera;Anthocharis cardamines;Anthocharis cardamines;1;Anthocharis  
cardamines;0.999999940675226;  
MN139711;Lepidoptera;Iolana iolas;Iolana iolas;1;Iolana iolas;0.999999106389198;  
MN139712;Lepidoptera;Melitaea parthenoides;Melitaea parthenoides;1;Melitaea  
parthenoides;0.999999968152765;  
MN139713;Lepidoptera;Lampides boeticus;Lampides boeticus;1;Lampides boeticus;0.99999999545906;  
MN139715;Lepidoptera;Coenonympha arcania;NA;0.002;NA;0.99999999999934;  
MN139716;Lepidoptera;Polyommatus icarus;Polyommatus icarus;0.001;Polyommatus  
icarus;0.999851081176144;  
MN139716;Lepidoptera;Polyommatus icarus;Polyommatus icarus;0.001;Polyommatus  
icarus;0.999851081176144;  
MN139717;Lepidoptera;Nymphalis antiopa;NA;0.23;Nymphalis antiopa;0.999999944198096;  
MN139718;Lepidoptera;Cyaniris semiargus;Cyaniris semiargus;NA;Cyaniris  
semiargus;0.99969577444782;  
MN139719;Lepidoptera;Fabriciana niobe;NA;0.004;Fabriciana niobe;0.989536562020899;  
MN139720;Lepidoptera;Pieris napi;NA;0.028;Pieris napi;0.888205720664699;  
MN139721;Lepidoptera;Brintesia circe;Brintesia circe;1;Brintesia circe;0.99999951254154;  
MN139722;Lepidoptera;Plebejus idas;NA;0.007;NA;0.999546324331549;  
MN139723;Lepidoptera;Thymelicus sylvestris;NA;0.324;Thymelicus sylvestris;0.999940778442454;  
MN139724;Lepidoptera;Polyommatus icarus;NA;0.048;Polyommatus icarus;0.976828298825372;  
MN139724;Lepidoptera;Polyommatus icarus;NA;0.048;Polyommatus icarus;0.976828298825372;  
MN139725;Lepidoptera;Fabriciana niobe;NA;0.005;Fabriciana niobe;0.992125835358755;  
MN139726;Lepidoptera;Argynnis aglaja;NA;NA;NA;0.999999999998051;  
MN139728;Lepidoptera;Lasionommata maera;Lasionommata maera;1;Lasionommata maera;0.999997945450226;  
MN139731;Lepidoptera;Maniola jurtina;NA;0.063;Maniola jurtina;0.770025363931686;  
MN139732;Lepidoptera;Apatura ilia;NA;0.165;Apatura ilia;0.956796812031481;  
MN139734;Lepidoptera;Satyrium pruni;NA;0.076;Satyrium pruni;0.990322364021655;  
MN139735;Lepidoptera;Pieris napi;NA;0.028;Pieris napi;0.888205720664699;  
MN139736;Lepidoptera;Pyrgus onopordi;Pyrgus onopordi;1;Pyrgus onopordi;0.999997111229755;  
MN139738;Lepidoptera;Maniola jurtina;NA;NA;Maniola jurtina;0.950689021412593;  
MN139740;Lepidoptera;Ochlodes sylvanus;NA;0.316;Ochlodes sylvanus;0.996318754838625;  
MN139743;Lepidoptera;Cupido argiades;NA;0.499;NA;0.99999999984682;  
MN139745;Lepidoptera;Colias alfacariensis;Colias alfacariensis;0.001;Colias  
alfacariensis;0.999926026317526;  
MN139749;Lepidoptera;Aricia agestis;NA;0.253;Aricia agestis;0.996350017387504;  
MN139750;Lepidoptera;Brenthis daphne;Brenthis daphne;0.999;Brenthis daphne;0.99795709566592;  
MN139751;Lepidoptera;Thymelicus acteon;Thymelicus acteon;1;Thymelicus acteon;0.9999999752248;  
MN139752;Lepidoptera;Coenonympha glycerion;NA;0.28;Coenonympha glycerion;0.999998036263913;  
MN139755;Lepidoptera;Thecla betulae;Thecla betulae;1;Thecla betulae;0.9999999972886;  
MN139756;Lepidoptera;Maniola jurtina;NA;0.171;Maniola jurtina;0.963697912386445;  
MN139757;Lepidoptera;Lysandra coridon;NA;NA;NA;0.998017994491822;  
MN139759;Lepidoptera;Erebia tyndarus;NA;NA;NA;0.99999999999783;  
MN139760;Lepidoptera;Lasionommata maera;Lasionommata maera;1;Lasionommata maera;0.99999776398485;  
MN139761;Lepidoptera;Aporia crataegi;NA;0.004;Aporia crataegi;0.999984184707536;  
MN139763;Lepidoptera;Polyommatus celina;Polyommatus celina;0.002;Polyommatus  
celina;0.999999997980922;  
MN139764;Lepidoptera;Ochlodes sylvanus;NA;0.316;Ochlodes sylvanus;0.996318754838625;  
MN139765;Lepidoptera;Pieris napi;NA;0.028;Pieris napi;0.888205720664699;  
MN139766;Lepidoptera;Gonepteryx cleopatra;Gonepteryx cleopatra;0.998;Gonepteryx  
cleopatra;0.999118636582266;  
MN139767;Lepidoptera;Boloria euphrosyne;Boloria euphrosyne;1;Boloria  
euphrosyne;0.999994787623591;  
MN139769;Lepidoptera;Aricia cramera;Aricia cramera;1;Aricia cramera;0.999993731037033;  
MN139770;Lepidoptera;Polyommatus damon;Polyommatus damon;1;Polyommatus damon;0.999997386150488;  
MN139771;Lepidoptera;Coenonympha oedippus;Coenonympha oedippus;1;Coenonympha  
oedippus;0.999999999999488;  
MN139773;Lepidoptera;Maniola jurtina;NA;0.012;Maniola jurtina;0.91755716175482;  
MN139775;Lepidoptera;Vanessa cardui;Vanessa cardui;1;Vanessa cardui;0.999996792914969;



MN139776;Lepidoptera;Hipparchia hermione;NA;NA;NA;0.999999999999991;  
MN139777;Lepidoptera;Satyrium acaciae;Satyrium acaciae;1;Satyrium acaciae;0.999999951077798;  
MN139778;Lepidoptera;Agriades orbitulus;Agriades orbitulus;NA;Agriades  
orbitulus;0.999216256740517;  
MN139779;Lepidoptera;Callophrys rubi;NA;0.019;Callophrys rubi;0.998201459637982;  
MN139780;Lepidoptera;Nymphalis c-album;NA;0.215;NA;0.999999192918557;  
MN139781;Lepidoptera;Coenonympha gardetta;Coenonympha gardetta;0.001;Coenonympha  
gardetta;0.891527308362633;  
MN139782;Lepidoptera;Plebejus argus;NA;0.328;Plebejus argus;0.969789734199889;  
MN139785;Lepidoptera;Vanessa cardui;Vanessa cardui;1;Vanessa cardui;0.999997579965112;  
MN139786;Lepidoptera;Erebia melampus;Erebia melampus;NA;Erebia melampus;0.950990028966024;  
MN139789;Lepidoptera;Satyrium ilicis;Satyrium ilicis;1;Satyrium ilicis;0.999999987901305;  
MN139790;Lepidoptera;Lasioommata megera;Lasioommata megera;1;Lasioommata megera;0.999379144055441;  
MN139792;Lepidoptera;Maniola tithonus;Pyronia tithonus;1;Pyronia tithonus;1;  
MN139793;Lepidoptera;Aricia cramera;Aricia cramera;1;Aricia cramera;0.999969749613305;  
MN139794;Lepidoptera;Fabriciana adippe;Fabriciana adippe;0.002;Fabriciana  
adippe;0.994515464870225;  
MN139795;Lepidoptera;Lycaena phlaeas;Lycaena phlaeas;1;Lycaena phlaeas;0.999999996363186;  
MN139796;Lepidoptera;Glaucopsyche alexis;Glaucopsyche alexis;0.001;Glaucopsyche  
alexis;0.94042380088325;  
MN139798;Lepidoptera;Thymelicus sylvestris;Thymelicus sylvestris;1;Thymelicus  
sylvestris;0.999999985935205;  
MN139801;Lepidoptera;Euphydryas aurinia;NA;0.106;Euphydryas aurinia;0.993939072040577;  
MN139802;Lepidoptera;Plebejus argus;NA;0.043;Plebejus argus;0.956187234366662;  
MN139803;Lepidoptera;Erebia neoridas;Erebia neoridas;NA;Erebia neoridas;0.998631936578793;  
MN139804;Lepidoptera;Cupido alcetas;NA;0.218;Cupido alcetas;0.833501983138177;  
MN139805;Lepidoptera;Hipparchia leighebi;Hipparchia leighebi;0.002;Hipparchia  
leighebi;0.856866627382455;  
MN139807;Lepidoptera;Aricia cramera;Aricia cramera;1;Aricia cramera;0.999993731037033;  
MN139811;Lepidoptera;Maniola jurtina;NA;0.063;Maniola jurtina;0.770025363931686;  
MN139813;Lepidoptera;Melitaea cinxia;Melitaea cinxia;1;Melitaea cinxia;0.9999999999999403;  
MN139815;Lepidoptera;Melitaea didyma;Melitaea didyma;1;Melitaea didyma;0.999870090903784;  
MN139817;Lepidoptera;Argynnis aglaja;NA;NA;Speyeria aglaja;0.872991147917853;  
MN139819;Lepidoptera;Hipparchia semele;NA;NA;Hipparchia semele;0.748345401572611;  
MN139823;Lepidoptera;Lycaena phlaeas;Lycaena phlaeas;1;Lycaena phlaeas;0.999999996363186;  
MN139824;Lepidoptera;Maniola cecilia;Pyronia cecilia;NA;Pyronia cecilia;1;  
MN139825;Lepidoptera;Nymphalis c-album;NA;0.215;NA;0.999999192918557;  
MN139826;Lepidoptera;Callophrys rubi;NA;0.019;Callophrys rubi;0.998201459637982;  
MN139828;Lepidoptera;Lasioommata megera;Lasioommata megera;1;Lasioommata megera;0.999379144055441;  
MN139829;Lepidoptera;Melitaea cinxia;Melitaea cinxia;1;Melitaea cinxia;0.9999999999999801;  
MN139830;Lepidoptera;Pyrgus malvoides;NA;0.155;Pyrgus malvoides;0.943212125204022;  
MN139831;Lepidoptera;Lycaena phlaeas;Lycaena phlaeas;1;Lycaena phlaeas;0.999999996363186;  
MN139832;Lepidoptera;Aricia cramera;Aricia cramera;1;Aricia cramera;0.999993731037033;  
MN139833;Lepidoptera;Aglais urticae;Aglais urticae;0.001;Aglais urticae;0.994396335177485;  
MN139834;Lepidoptera;Apatura ilia;NA;0.039;Apatura ilia;0.977274423026401;  
MN139835;Lepidoptera;Melitaea parthenoides;Melitaea parthenoides;1;Melitaea  
parthenoides;0.99999998877297;  
MN139836;Lepidoptera;Colias alfacariensis;Colias alfacariensis;1;Colias  
alfacariensis;0.999986994131001;  
MN139838;Lepidoptera;Maniola jurtina;NA;0.004;Maniola jurtina;0.945262064633298;  
MN139839;Lepidoptera;Hipparchia leighebi;Hipparchia leighebi;0.001;Hipparchia  
leighebi;0.858290018061167;  
MN139840;Lepidoptera;Melitaea didyma;Melitaea didyma;1;Melitaea didyma;0.999945816868155;  
MN139841;Lepidoptera;Melitaea britomartis;Melicta britomartis;NA;Melitaea  
britomartis;0.935497948168019;  
MN139842;Lepidoptera;Ochlodes sylvanus;NA;0.316;Ochlodes sylvanus;0.996318754838625;  
MN139843;Lepidoptera;Fabriciana niobe;Fabriciana niobe;0.001;Fabriciana niobe;0.93186202957215;  
MN139844;Lepidoptera;Hipparchia fagi;Hipparchia fagi;NA;Hipparchia fagi;0.985731526452115;  
MN139848;Lepidoptera;Thymelicus acteon;Thymelicus acteon;1;Thymelicus acteon;0.99999999752248;  
MN139851;Lepidoptera;Polyommatus damon;Polyommatus damon;1;Polyommatus damon;0.999999916924512;  
MN139854;Lepidoptera;Pyrgus malvoides;NA;0.076;Pyrgus malvoides;0.887854315566122;  
MN139855;Lepidoptera;Erebia medusa;NA;0.009;Erebia medusa;0.986275612856827;  
MN139856;Lepidoptera;Erebia euryale;NA;NA;Erebia euryale;0.985600540820829;  
MN139857;Lepidoptera;Aporia crataegi;NA;0.009;Aporia crataegi;0.999996613335036;  
MN139858;Lepidoptera;Colias crocea;NA;NA;NA;0.999999999999969;  
MN139859;Lepidoptera;Pyrgus carthami;Pyrgus carthami;1;Pyrgus carthami;0.999995592447668;  
MN139860;Lepidoptera;Coenonympha pamphilus;Coenonympha pamphilus;1;Coenonympha  
pamphilus;0.9999999999999432;  
MN139862;Lepidoptera;Pieris napi;NA;0.028;Pieris napi;0.888205720664699;  
MN139863;Lepidoptera;Coenonympha corinna;Coenonympha corinna;1;Coenonympha  
corinna;0.999999999974449;  
MN139864;Lepidoptera;Pieris napi;NA;0.028;Pieris napi;0.888205720664699;  
MN139865;Lepidoptera;Nymphalis c-album;NA;0.215;NA;0.999999192918557;  
MN139867;Lepidoptera;Aricia eumedon;Eumedonia eumedon;0.001;Eumedonia eumedon;0.997789624617489;  
MN139871;Lepidoptera;Boloria titania;Boloria titania;0.001;Boloria titania;0.99983358374111;  
MN139873;Lepidoptera;Maniola jurtina;NA;0.012;Maniola jurtina;0.91755716175482;  
MN139874;Lepidoptera;Maniola tithonus;Pyronia tithonus;1;Pyronia tithonus;1;  
MN139875;Lepidoptera;Colias crocea;NA;0.059;NA;0.9999999999999738;

MN139876;Lepidoptera;Hipparchia hermione;Hipparchia hermione;NA;Hipparchia hermione;0.726013733187223;  
MN139877;Lepidoptera;Cupido alcetas;NA;0.218;Cupido alcetas;0.833501983138177;  
MN139878;Lepidoptera;Papilio machaon;Papilio machaon;0.001;Papilio machaon;0.999463129150422;  
MN139880;Lepidoptera;Maniola jurtina;NA;0.001;Maniola jurtina;0.939220105860875;  
MN139881;Lepidoptera;Agriades optilete;Agriades optilete;1;Agriades optilete;0.99999993460563;  
MN139882;Lepidoptera;Glaucopsyche alexis;Glaucopsyche alexis;0.001;Glaucopsyche alexis;0.94042380088325;  
MN139883;Lepidoptera;Pieris napi;NA;0.011;Pieris napi;0.801985394724814;  
MN139884;Lepidoptera;Ochlodes sylvanus;NA;0.316;Ochlodes sylvanus;0.996318754838625;  
MN139886;Lepidoptera;Argynnis aglaja;NA;NA;Speyeria aglaja;0.872991147917853;  
MN139887;Lepidoptera;Coenonympha pamphilus;Coenonympha pamphilus;1;Coenonympha pamphilus;0.99999999990962;  
MN139889;Lepidoptera;Carterocephalus palaemon;NA;0.052;Carterocephalus palaemon;0.728445051795325;  
MN139890;Lepidoptera;Erebia pluto;Erebia pluto;1;Erebia pluto;0.999999696335028;  
MN139891;Lepidoptera;Melitaea cinxia;Melitaea cinxia;1;Melitaea cinxia;0.99999999999801;  
MN139893;Lepidoptera;Thymelicus acteon;Thymelicus acteon;1;Thymelicus acteon;0.99999998015312;  
MN139894;Lepidoptera;Pyrgus armoricanus;Pyrgus armoricanus;1;Pyrgus armoricanus;0.999996875500834;  
MN139895;Lepidoptera;Pyrgus malvoides;NA;0.066;Pyrgus malvoides;0.960778066111538;  
MN139896;Lepidoptera;Argynnis aglaja;NA;NA;Speyeria aglaja;0.872991147917853;  
MN139897;Lepidoptera;Lasiommata maera;Lasiommata maera;1;Lasiommata maera;0.99999510792253;  
MN139899;Lepidoptera;Brintesia circe;Brintesia circe;NA;Brintesia circe;0.999999813082031;  
MN139900;Lepidoptera;Hipparchia aristaeus;Hipparchia aristaeus;1;Hipparchia aristaeus;0.99999993824275;  
MN139901;Lepidoptera;Brenthis daphne;Brenthis daphne;0.001;Brenthis daphne;0.997781825264304;  
MN139902;Lepidoptera;Argynnis aglaja;NA;NA;Speyeria aglaja;0.901634087394819;  
MN139903;Lepidoptera;Aporia crataegi;NA;NA;Aporia crataegi;0.999998459680561;  
MN139904;Lepidoptera;Melitaea trivia;Melitaea trivia;1;Melitaea trivia;0.99999999990402;  
MN139905;Lepidoptera;Boloria titania;Boloria titania;0.001;Boloria titania;0.999477346009661;  
MN139906;Lepidoptera;Aricia cramera;Aricia cramera;1;Aricia cramera;0.999993731037033;  
MN139910;Lepidoptera;Polyommatus icarus;NA;0.003;Polyommatus icarus;0.986125651677522;  
MN139910;Lepidoptera;Polyommatus icarus;NA;0.003;Polyommatus icarus;0.986125651677522;  
MN139912;Lepidoptera;Lasiommata maera;Lasiommata maera;1;Lasiommata maera;0.999996552555305;  
MN139913;Lepidoptera;Favonius quercus;Favonius quercus;NA;Favonius quercus;0.856713594860622;  
MN139914;Lepidoptera;Glaucopsyche alexis;Glaucopsyche alexis;0.001;Glaucopsyche alexis;0.94042380088325;  
MN139915;Lepidoptera;Maniola jurtina;NA;0.012;Maniola jurtina;0.91755716175482;  
MN139916;Lepidoptera;Melitaea cinxia;Melitaea cinxia;1;Melitaea cinxia;0.99999999999773;  
MN139917;Lepidoptera;Polyommatus damon;Polyommatus damon;1;Polyommatus damon;0.99999897832231;  
MN139919;Lepidoptera;Hipparchia semele;NA;NA;Hipparchia semele;0.748345401572611;  
MN139920;Lepidoptera;Erynnis tages;Erynnis tages;1;Erynnis tages;0.999955880826156;  
MN139921;Lepidoptera;Polyommatus icarus;Polyommatus icarus;0.001;Polyommatus icarus;0.999851522482238;  
MN139921;Lepidoptera;Polyommatus icarus;Polyommatus icarus;0.001;Polyommatus icarus;0.999851522482238;  
MN139922;Lepidoptera;Pyrgus carthami;Pyrgus carthami;1;Pyrgus carthami;0.99999551310754;  
MN139924;Lepidoptera;Melitaea didyma;Melitaea didyma;1;Melitaea didyma;0.995729075061249;  
MN139926;Lepidoptera;Aricia agestis;NA;0.069;Aricia agestis;0.995918114091591;  
MN139927;Lepidoptera;Brintesia circe;Brintesia circe;1;Brintesia circe;0.99999951254154;  
MN139929;Lepidoptera;Lampides boeticus;Lampides boeticus;1;Lampides boeticus;0.99999999545906;  
MN139931;Lepidoptera;Colias alfacariensis;Colias alfacariensis;0.001;Colias alfacariensis;0.999926026317526;  
MN139932;Lepidoptera;Maniola jurtina;NA;0.001;Maniola jurtina;0.939220105860875;  
MN139933;Lepidoptera;Hipparchia fagi;NA;NA;Hipparchia fagi;0.958291584360022;  
MN139934;Lepidoptera;Minois dryas;NA;0.025;Minois dryas;0.850746026247397;  
MN139935;Lepidoptera;Lampides boeticus;Lampides boeticus;1;Lampides boeticus;0.9999999935136;  
MN139936;Lepidoptera;Vanessa atalanta;Vanessa atalanta;1;Vanessa atalanta;0.99999999383476;  
MN139938;Lepidoptera;Thymelicus lineola;Thymelicus lineola;1;Thymelicus lineola;0.999971535093703;  
MN139939;Lepidoptera;Brenthis ino;Brenthis ino;0.001;Brenthis ino;0.994711912827522;  
MN139940;Lepidoptera;Lycaena tityrus;Lycaena tityrus;1;Lycaena tityrus;0.99997855580031;  
MN139942;Lepidoptera;Hipparchia hermione;Hipparchia hermione;1;Hipparchia hermione;0.999956033895189;  
MN139944;Lepidoptera;Lysandra coridon;NA;NA;NA;0.999076788188261;  
MN139946;Lepidoptera;Coenonympha pamphilus;Coenonympha pamphilus;1;Coenonympha pamphilus;0.99999999999744;  
MN139947;Lepidoptera;Coenonympha arcania;NA;0.172;Coenonympha arcania;0.963036309473038;  
MN139948;Lepidoptera;Melitaea didyma;Melitaea didyma;1;Melitaea didyma;0.999870115406424;  
MN139949;Lepidoptera;Celastrina argiolus;Celastrina argiolus;1;Celastrina argiolus;0.999527385150531;  
MN139950;Lepidoptera;Thymelicus acteon;Thymelicus acteon;1;Thymelicus acteon;0.9999999752248;  
MN139954;Lepidoptera;Aricia artaxerxes;Plebejus argus;1;Aricia artaxerxes;0.999743187199922;  
MN139955;Lepidoptera;Pyrgus alveus;NA;0.003;NA;0.99999999997732;  
MN139956;Lepidoptera;Euphydryas intermedia;Euphydryas intermedia;0.017;Euphydryas intermedia;0.770732210581036;

MN139957;Lepidoptera;Anthocharis cardamines;Anthocharis cardamines;1;Anthocharis cardamines;0.999999933384063;  
MN139958;Lepidoptera;Lasiommata megera;Lasiommata megera;0.001;Lasiommata megera;0.999458259886141;  
MN139962;Lepidoptera;Colias alfacariensis;Colias alfacariensis;0.001;Colias alfacariensis;0.999926026317526;  
MN139963;Lepidoptera;Brintesia circe;Brintesia circe;1;Brintesia circe;0.99999951254154;  
MN139965;Lepidoptera;Polyommatus dorylas;Polyommatus dorylas;0.008;Polyommatus dorylas;0.991281865899703;  
MN139966;Lepidoptera;Colias crocea;NA;0.059;NA;0.99999999999738;  
MN139967;Lepidoptera;Melitaea didyma;Melitaea didyma;1;Melitaea didyma;0.997852099274181;  
MN139969;Lepidoptera;Melitaea cinxia;NA;0.055;Melitaea cinxia;0.99999999999838;  
MN139974;Lepidoptera;Pyrgus alveus;NA;0.003;NA;0.999999999997732;  
MN139975;Lepidoptera;Erebia medusa;NA;0.04;Erebia medusa;0.984042649596477;  
MN139976;Lepidoptera;Boloria thore;Boloria thore;1;Boloria thore;0.99999987376814;  
MN139977;Lepidoptera;Erebia pronoe;Erebia pronoe;NA;Erebia pronoe;0.790922387957511;  
MN139978;Lepidoptera;Polyommatus icarus;NA;0.13;Polyommatus icarus;0.979762695748748;  
MN139978;Lepidoptera;Polyommatus icarus;NA;0.13;Polyommatus icarus;0.979762695748748;  
MN139979;Lepidoptera;Polyommatus icarus;Polyommatus icarus;0.001;Polyommatus icarus;0.999821128709045;  
MN139979;Lepidoptera;Polyommatus icarus;Polyommatus icarus;0.001;Polyommatus icarus;0.999821128709045;  
MN139982;Lepidoptera;Melitaea cinxia;Melitaea cinxia;1;Melitaea cinxia;0.999999999999829;  
MN139983;Lepidoptera;Lasiommata maera;Lasiommata maera;1;Lasiommata maera;0.99999510792253;  
MN139984;Lepidoptera;Lasiommata maera;Lasiommata maera;1;Lasiommata maera;0.99999510792253;  
MN139985;Lepidoptera;Pyrgus sidae;Pyrgus sidae;1;Pyrgus sidae;0.999973016525821;  
MN139986;Lepidoptera;Coenonympha oedippus;Coenonympha oedippus;1;Coenonympha oedippus;0.999999999999972;  
MN139987;Lepidoptera;Polyommatus icarus;Polyommatus icarus;0.001;Polyommatus icarus;0.999851522482238;  
MN139987;Lepidoptera;Polyommatus icarus;Polyommatus icarus;0.001;Polyommatus icarus;0.999851522482238;  
MN139988;Lepidoptera;Euphydryas aurinia;NA;0.31;Euphydryas aurinia;0.993387708761386;  
MN139989;Lepidoptera;Brenthis daphne;NA;0.102;Brenthis daphne;0.717134521611551;  
MN139991;Lepidoptera;Brenthis daphne;Brenthis daphne;0.003;Brenthis daphne;0.984519516505019;  
MN139992;Lepidoptera;Maniola cecilia;Pyronia cecilia;1;Pyronia cecilia;1;  
MN139993;Lepidoptera;Brintesia circe;Brintesia circe;1;Brintesia circe;0.99999951254154;  
MN139997;Lepidoptera;Fabriciana elisa;Fabriciana elisa;0.001;Fabriciana elisa;0.994839902224823;  
MN139998;Lepidoptera;Glaucopsyche melanops;Glaucopsyche melanops;1;Glaucopsyche melanops;0.999952924254607;  
MN139999;Lepidoptera;Colias crocea;NA;0.059;NA;0.999999999999738;  
MN140000;Lepidoptera;Nymphalis egea;Polygonia egea;1;Polygonia egea;0.999999758078475;  
MN140001;Lepidoptera;Maniola jurtina;NA;0.001;Maniola jurtina;0.939220105860875;  
MN140002;Lepidoptera;Pyrgus alveus;NA;NA;0.999999999994797;  
MN140003;Lepidoptera;Coenonympha pamphilus;Coenonympha pamphilus;1;Coenonympha pamphilus;0.999999999999744;  
MN140005;Lepidoptera;Pieris napi;NA;0.028;Pieris napi;0.888205720664699;  
MN140006;Lepidoptera;Thymelicus sylvestris;NA;0.324;Thymelicus sylvestris;0.999940778442454;  
MN140007;Lepidoptera;Coenonympha arcania;NA;0.002;NA;0.99999999999972;  
MN140008;Lepidoptera;Celastrina argiolus;Celastrina argiolus;1;Celastrina argiolus;0.999527385150531;  
MN140009;Lepidoptera;Lycaena virgaureae;NA;0.186;Lycaena virgaureae;0.999491227342155;  
MN140012;Lepidoptera;Euphydryas aurinia;NA;0.106;Euphydryas aurinia;0.993939072040577;  
MN140013;Lepidoptera;Polyommatus daphnis;NA;0.062;Polyommatus daphnis;0.995724017767077;  
MN140015;Lepidoptera;Plebejus argus;NA;0.043;Plebejus argus;0.956187234366662;  
MN140016;Lepidoptera;Carcharodus alceae;Carcharodus alceae;0.999;Carcharodus alceae;0.999999996339511;  
MN140017;Lepidoptera;Erebia cassioides;NA;NA;NA;0.999999999999977;  
MN140018;Lepidoptera;Erebia eriphyle;Erebia eriphyle;1;Erebia eriphyle;0.99999983979336;  
MN140019;Lepidoptera;Euphydryas cynthia;Euphydryas cynthia;1;Euphydryas cynthia;0.99999999402945;  
MN140021;Lepidoptera;Apatura iris;Apatura iris;1;Apatura iris;0.999999999999972;  
MN140022;Lepidoptera;Ochlodes sylvanus;NA;0.316;Ochlodes sylvanus;0.996318754838625;  
MN140024;Lepidoptera;Hipparchia fagi;NA;NA;Hipparchia fagi;0.90747740458264;  
MN140025;Lepidoptera;Pyrgus malvoides;NA;0.176;Pyrgus malvoides;0.940490890379026;  
MN140027;Lepidoptera;Aricia eumedon;Eumedonia eumedon;0.001;Eumedonia eumedon;0.99836395629257;  
MN140028;Lepidoptera;Coenonympha arcania;NA;0.172;Coenonympha arcania;0.963036309473038;  
MN140029;Lepidoptera;Lysandra coridon;NA;NA;Lysandra coridon;0.749217519592352;  
MN140030;Lepidoptera;Fabriciana adippe;NA;NA;Fabriciana adippe;0.922280384106682;  
MN140031;Lepidoptera;Aricia cramera;Aricia cramera;1;Aricia cramera;0.999993596642023;  
MN140034;Lepidoptera;Aricia agestis;NA;0.067;Aricia agestis;0.999509743227786;  
MN140035;Lepidoptera;Pyrgus armoricanus;Pyrgus armoricanus;1;Pyrgus armoricanus;0.999997534125241;  
MN140037;Lepidoptera;Nymphalis antiopa;NA;0.083;Nymphalis antiopa;0.999999719556979;  
MN140038;Lepidoptera;Satyrus ferula;Satyrus ferula;0.001;Satyrus ferula;0.992107254386621;  
MN140039;Lepidoptera;Erebia pronoe;Erebia pronoe;1;Erebia pronoe;0.999250891771858;  
MN140041;Lepidoptera;Thymelicus sylvestris;NA;0.324;Thymelicus sylvestris;0.999940778442454;  
MN140042;Lepidoptera;Cupido minimus;NA;0.009;Cupido minimus;0.999791453712643;

MN140043;Lepidoptera;Maniola cecilia;Pyronia cecilia;NA;Pyronia cecilia;1;  
 MN140044;Lepidoptera;Argynnis aglaja;NA;NA;NA;0.999999999998051;  
 MN140045;Lepidoptera;Argynnis aglaja;NA;0.005;Speyeria aglaja;0.896438572419641;  
 MN140046;Lepidoptera;Carcharodus alceae;Carcharodus alceae;1;Carcharodus  
 alceae;0.999999998465938;  
 MN140047;Lepidoptera;Colias alfacariensis;Colias alfacariensis;0.001;Colias  
 alfacariensis;0.999926026317526;  
 MN140048;Lepidoptera;Pyrgus malvoides;NA;0.176;Pyrgus malvoides;0.940490890379026;  
 MN140049;Lepidoptera;Hipparchia semele;NA;0.003;Hipparchia semele;0.87555777102739;  
 MN140050;Lepidoptera;Lasiommata maera;Lasiommata maera;1;Lasiommata maera;0.999988599344549;  
 MN140051;Lepidoptera;Argynnis aglaja;NA;0.005;Speyeria aglaja;0.896438572419641;  
 MN140054;Lepidoptera;Pyrgus sidae;Pyrgus sidae;1;Pyrgus sidae;0.999994277634217;  
 MN140055;Lepidoptera;Melanargia galathea;Melanargia galathea;NA;Melanargia  
 galathea;0.987293011345651;  
 MN140056;Lepidoptera;Gonepteryx rhamni;NA;0.474;Gonepteryx rhamni;0.982076396127858;  
 MN140057;Lepidoptera;Polyommatus daphnis;NA;0.062;Polyommatus daphnis;0.995724017767077;  
 MN140059;Lepidoptera;Coenonympha pamphilus;Coenonympha pamphilus;1;Coenonympha  
 pamphilus;0.99999999997613;  
 MN140060;Lepidoptera;Arethusana arethusana;Arethusana arethusana;0.019;Arethusana  
 arethusana;0.999964353716342;  
 MN140062;Lepidoptera;Lasiommata maera;Lasiommata maera;1;Lasiommata maera;0.999996200814449;  
 MN140064;Lepidoptera;Colias crocea;NA;NA;NA;0.99999999997968;  
 MN140066;Lepidoptera;Brintesia circe;Brintesia circe;1;Brintesia circe;0.99999855299773;  
 MN140070;Lepidoptera;Thymelicus lineola;Thymelicus lineola;1;Thymelicus  
 lineola;0.999996248507716;  
 MN140071;Lepidoptera;Thymelicus sylvestris;Thymelicus sylvestris;1;Thymelicus  
 sylvestris;0.999999985935205;  
 MN140072;Lepidoptera;Celastrina argiolus;Celastrina argiolus;1;Celastrina  
 argiolus;0.999527385150531;  
 MN140074;Lepidoptera;Hipparchia semele;NA;NA;Hipparchia semele;0.748345401572611;  
 MN140075;Lepidoptera;Limenitis camilla;Limenitis camilla;0.002;Limenitis  
 camilla;0.999986372375421;  
 MN140076;Lepidoptera;Pyrgus malvoides;NA;0.2;Pyrgus malvoides;0.91582520613586;  
 MN140077;Lepidoptera;Maniola jurtina;NA;0.001;Maniola jurtina;0.939220105860875;  
 MN140081;Lepidoptera;Vanessa atalanta;Vanessa atalanta;1;Vanessa atalanta;0.99999999757762;  
 MN140082;Lepidoptera;Satyrium ilicis;Satyrium ilicis;1;Satyrium ilicis;0.999999987901305;  
 MN140083;Lepidoptera;Anthocharis cardamines;Anthocharis cardamines;1;Anthocharis  
 cardamines;0.999999917840544;  
 MN140085;Lepidoptera;Gonepteryx cleopatra;Gonepteryx cleopatra;0.998;Gonepteryx  
 cleopatra;0.999118636582266;  
 MN140086;Lepidoptera;Carterocephalus palaemon;NA;0.052;Carterocephalus  
 palaemon;0.728445051795325;  
 MN140090;Lepidoptera;Anthocharis cardamines;Anthocharis cardamines;1;Anthocharis  
 cardamines;0.999999979642354;  
 MN140091;Lepidoptera;Maniola jurtina;NA;0.001;Maniola jurtina;0.939220105860875;  
 MN140093;Lepidoptera;Maniola cecilia;Pyronia cecilia;1;Pyronia cecilia;1;  
 MN140094;Lepidoptera;Maniola jurtina;NA;0.001;Maniola jurtina;0.939220105860875;  
 MN140095;Lepidoptera;Melitaea trivia;Melitaea trivia;1;Melitaea trivia;0.99999999960437;  
 MN140096;Lepidoptera;Melitaea varia;Melitaea varia;1;Melitaea varia;0.99999455569287;  
 MN140097;Lepidoptera;Argynnis aglaja;NA;NA;Speyeria aglaja;0.872991147917853;  
 MN140098;Lepidoptera;Colias alfacariensis;Colias alfacariensis;0.001;Colias  
 alfacariensis;0.999926026317526;  
 MN140099;Lepidoptera;Nymphalis c-album;NA;0.215;NA;0.999999192918557;  
 MN140100;Lepidoptera;Maniola cecilia;Pyronia cecilia;NA;Pyronia cecilia;1;  
 MN140102;Lepidoptera;Favonius quercus;NA;NA;Favonius quercus;0.73046069582187;  
 MN140104;Lepidoptera;Lycaena phlaeas;Lycaena phlaeas;1;Lycaena phlaeas;0.999999996363186;  
 MN140106;Lepidoptera;Maniola jurtina;NA;0.012;Maniola jurtina;0.91755716175482;  
 MN140109;Lepidoptera;Maniola jurtina;NA;0.012;Maniola jurtina;0.91755716175482;  
 MN140111;Lepidoptera;Pyrgus malvoides;NA;0.2;Pyrgus malvoides;0.91582520613586;  
 MN140113;Lepidoptera;Fabriciana adippe;Fabriciana adippe;0.001;Fabriciana  
 adippe;0.999538788643547;  
 MN140115;Lepidoptera;Lycaena phlaeas;Lycaena phlaeas;1;Lycaena phlaeas;0.999999996363186;  
 MN140117;Lepidoptera;Aricia cramera;Aricia cramera;1;Aricia cramera;0.999993731037033;  
 MN140118;Lepidoptera;Melitaea cinxia;Melitaea cinxia;1;Melitaea cinxia;0.99999999999801;  
 MN140119;Lepidoptera;Lysandra coridon;NA;NA;NA;0.997949615104622;  
 MN140121;Lepidoptera;Erynnis tages;Erynnis tages;1;Erynnis tages;0.999999281987018;  
 MN140122;Lepidoptera;Chazara briseis;Chazara briseis;1;Chazara briseis;0.999980393060755;  
 MN140125;Lepidoptera;Celastrina argiolus;Celastrina argiolus;1;Celastrina  
 argiolus;0.999037794018796;  
 MN140126;Lepidoptera;Gonepteryx cleopatra;Gonepteryx cleopatra;0.998;Gonepteryx  
 cleopatra;0.999118636582266;  
 MN140127;Lepidoptera;Melitaea diamina;NA;0.149;Melitaea diamina;0.999999996592464;  
 MN140128;Lepidoptera;Pyrgus armoricanus;Pyrgus armoricanus;1;Pyrgus  
 armoricanus;0.999914079595002;  
 MN140129;Lepidoptera;Lasiommata maera;Lasiommata maera;1;Lasiommata maera;0.999988599344549;  
 MN140130;Lepidoptera;Anthocharis damone;Anthocharis damone;1;Anthocharis  
 damone;0.999999933275918;

MN140131;Lepidoptera;Euphydryas intermedia;Euphydryas intermedia;0.017;Euphydryas intermedia;0.770732210581036;  
MN140132;Lepidoptera;Pyrgus armoricanus;Pyrgus armoricanus;1;Pyrgus armoricanus;0.999997975465877;  
MN140133;Lepidoptera;Euphydryas intermedia;NA;NA;NA;0.99999999996973;  
MN140135;Lepidoptera;Melitaea didyma;Melitaea didyma;1;Melitaea didyma;0.999945816868155;  
MN140136;Lepidoptera;Fabriciana niobe;NA;0.005;Fabriciana niobe;0.992125835358755;  
MN140137;Lepidoptera;Boloria euphrosyne;Boloria euphrosyne;1;Boloria euphrosyne;0.999997439411014;  
MN140140;Lepidoptera;Maniola jurtina;NA;0.012;Maniola jurtina;0.91755716175482;  
MN140141;Lepidoptera;Colias alfacariensis;Colias alfacariensis;0.001;Colias alfacariensis;0.999926026317526;  
MN140142;Lepidoptera;Pyrgus carthami;Pyrgus carthami;1;Pyrgus carthami;0.999995592447668;  
MN140144;Lepidoptera;Cupido alcetas;NA;0.218;Cupido alcetas;0.833501983138177;  
MN140145;Lepidoptera;Carcharodus alceae;Carcharodus alceae;0.001;Carcharodus alceae;0.999999995290494;  
MN140146;Lepidoptera;Gegenes nostrodamus;Gegenes nostrodamus;1;Gegenes nostrodamus;0.999999995055305;  
MN140147;Lepidoptera;Chazara briseis;Chazara briseis;1;Chazara briseis;0.999980393060755;  
MN140148;Lepidoptera;Vanessa atalanta;Vanessa atalanta;1;Vanessa atalanta;0.99999999776037;  
MN140150;Lepidoptera;Maniola jurtina;NA;NA;Maniola jurtina;0.973823960006955;  
MN140151;Lepidoptera;Pyrgus malvoides;NA;0.053;Pyrgus malvoides;0.959164206737781;  
MN140152;Lepidoptera;Thymelicus acteon;Thymelicus acteon;1;Thymelicus acteon;0.999999997929734;  
MN140153;Lepidoptera;Boloria euphrosyne;Boloria euphrosyne;1;Boloria euphrosyne;0.99999886706838;  
MN140154;Lepidoptera;Polyommatus icarus;NA;0.069;Polyommatus icarus;0.700731738155863;  
MN140154;Lepidoptera;Polyommatus icarus;NA;0.069;Polyommatus icarus;0.700731738155863;  
MN140156;Lepidoptera;Gonepteryx cleopatra;Gonepteryx cleopatra;0.998;Gonepteryx cleopatra;0.999118636582266;  
MN140157;Lepidoptera;Aricia cramera;Aricia cramera;1;Aricia cramera;0.999990014848976;  
MN140158;Lepidoptera;Boloria euphrosyne;Boloria euphrosyne;1;Boloria euphrosyne;0.999998838188297;  
MN140159;Lepidoptera;Lycaena virgaureae;NA;0.186;Lycaena virgaureae;0.999491227342155;  
MN140161;Lepidoptera;Lycaena tityrus;Lycaena tityrus;1;Lycaena tityrus;0.999998928238034;  
MN140163;Lepidoptera;Nymphalis c-album;NA;0.215;NA;0.999999192918557;  
MN140164;Lepidoptera;Maniola jurtina;NA;0.171;Maniola jurtina;0.963697912386445;  
MN140165;Lepidoptera;Boloria titania;Boloria titania;0.001;Boloria titania;0.99983358374111;  
MN140166;Lepidoptera;Brenthis daphne;NA;0.102;Brenthis daphne;0.717134521611551;  
MN140167;Lepidoptera;Cupido minimus;NA;0.009;Cupido minimus;0.999791453712643;  
MN140168;Lepidoptera;Pyrgus alveus;NA;0.007;NA;0.99999999997191;  
MN140171;Lepidoptera;Thecla betulae;Thecla betulae;1;Thecla betulae;0.99999999972886;  
MN140174;Lepidoptera;Coenonympha gardetta;NA;0.096;NA;0.99999999999996;  
MN140175;Lepidoptera;Maniola jurtina;NA;0.012;Maniola jurtina;0.91755716175482;  
MN140176;Lepidoptera;Colias hyale;Colias hyale;0.015;Colias hyale;0.999997884296128;  
MN140177;Lepidoptera;Lycaena phlaeas;Lycaena phlaeas;1;Lycaena phlaeas;0.99999996363186;  
MN140182;Lepidoptera;Coenonympha oedippus;Coenonympha oedippus;1;Coenonympha oedippus;0.999999999999972;  
MN140184;Lepidoptera;Thymelicus sylvestris;NA;0.324;Thymelicus sylvestris;0.999940778442454;  
MN140185;Lepidoptera;Parnassius apollo;Parnassius apollo;1;Parnassius apollo;0.994616929802738;  
MN140186;Lepidoptera;Boloria graeca;Boloria graeca;1;Boloria graeca;0.999999954920356;  
MN140187;Lepidoptera;Plebejus argus;NA;0.043;Plebejus argus;0.956256547935817;  
MN140188;Lepidoptera;Erebia melampus;Erebia melampus;NA;Erebia melampus;0.947570619386055;  
MN140190;Lepidoptera;Lysandra coridon;NA;NA;NA;0.992315981017308;  
MN140191;Lepidoptera;Melitaea didyma;NA;NA;Melitaea didyma;0.975336875545609;  
MN140192;Lepidoptera;Apatura ilia;NA;0.165;Apatura ilia;0.956796812031481;  
MN140193;Lepidoptera;Aphantopus hyperantus;Aphantopus hyperantus;0.003;Aphantopus hyperantus;0.99999455871523;  
MN140194;Lepidoptera;Colias alfacariensis;Colias alfacariensis;0.001;Colias alfacariensis;0.999926026317526;  
MN140196;Lepidoptera;Thymelicus sylvestris;NA;0.324;Thymelicus sylvestris;0.999940778442454;  
MN140197;Lepidoptera;Carcharodus alceae;Carcharodus alceae;1;Carcharodus alceae;0.999999994809997;  
MN140198;Lepidoptera;Brenthis daphne;Brenthis daphne;0.001;Brenthis daphne;0.996209297077896;  
MN140200;Lepidoptera;Erebia pharte;Erebia pharte;1;Erebia pharte;0.9999999630495;  
MN140201;Lepidoptera;Glaucopsyche alexis;Glaucopsyche alexis;0.001;Glaucopsyche alexis;0.94042380088325;  
MN140202;Lepidoptera;Vanessa cardui;Vanessa cardui;1;Vanessa cardui;0.99999945983318;  
MN140203;Lepidoptera;Euphydryas maturna;NA;0.126;Euphydryas maturna;0.885705216462044;  
MN140204;Lepidoptera;Anthocharis euphenoides;NA;0.172;Anthocharis euphenoides;0.943741664916385;  
MN140205;Lepidoptera;Thymelicus sylvestris;Thymelicus sylvestris;1;Thymelicus sylvestris;0.99999985935205;  
MN140207;Lepidoptera;Callophrys rubi;NA;0.001;Callophrys rubi;0.99870518510598;  
MN140209;Lepidoptera;Maniola jurtina;NA;0.003;Maniola jurtina;0.934943936861184;  
MN140210;Lepidoptera;Gonepteryx rhamni;NA;0.189;Gonepteryx rhamni;0.989643004532712;  
MN140211;Lepidoptera;Maniola jurtina;NA;0.153;Maniola jurtina;0.908984189778786;  
MN140212;Lepidoptera;Erebia pronoe;Erebia pronoe;1;Erebia pronoe;0.999718339357544;  
MN140213;Lepidoptera;Lycaena virgaureae;NA;0.186;Lycaena virgaureae;0.999491227342155;  
MN140214;Lepidoptera;Melitaea didyma;Melitaea didyma;1;Melitaea didyma;0.999937162819573;

MN140215;Lepidoptera;Maniola jurtina;NA;0.001;Maniola jurtina;0.939220105860875;  
MN140216;Lepidoptera;Argynnis aglaja;NA;NA;Speyeria aglaja;0.872991147917853;  
MN140217;Lepidoptera;Pieris napi;NA;0.011;Pieris napi;0.801985394724814;  
MN140219;Lepidoptera;Melitaea diamina;NA;0.305;Melitaea diamina;0.999999994065661;  
MN140220;Lepidoptera;Lycaena phlaeas;Lycaena phlaeas;1;Lycaena phlaeas;0.999999996363186;  
MN140221;Lepidoptera;Pyrgus onopordi;Pyrgus onopordi;1;Pyrgus onopordi;0.999997111229755;  
MN140222;Lepidoptera;Thymelicus acteon;Thymelicus acteon;1;Thymelicus acteon;0.9999999752248;  
MN140227;Lepidoptera;Melitaea didyma;Melitaea didyma;1;Melitaea didyma;0.99009216179415;  
MN140229;Lepidoptera;Aricia cramera;Aricia cramera;1;Aricia cramera;0.999993731037033;  
MN140231;Lepidoptera;Pyrgus malvae;Pyrgus malvae;NA;Pyrgus malvae;0.980121140374433;  
MN140233;Lepidoptera;Aricia eumedon;Eumedonia eumedon;0.001;Eumedonia eumedon;0.998400646011029;  
MN140235;Lepidoptera;Thymelicus acteon;Thymelicus acteon;1;Thymelicus acteon;0.9999999752248;  
MN140236;Lepidoptera;Colias crocea;NA;0.059;NA;0.99999999999738;  
MN140238;Lepidoptera;Maniola jurtina;NA;0.012;Maniola jurtina;0.91755716175482;  
MN140239;Lepidoptera;Gonepteryx cleopatra;Gonepteryx cleopatra;0.998;Gonepteryx  
cleopatra;0.999118636582266;  
MN140240;Lepidoptera;Pyrgus armoricanus;Pyrgus armoricanus;1;Pyrgus  
armoricanus;0.999998381055323;  
MN140241;Lepidoptera;Pieris napi;NA;0.028;Pieris napi;0.888205720664699;  
MN140244;Lepidoptera;Gonepteryx rhamni;NA;0.202;Gonepteryx rhamni;0.990544908845376;  
MN140245;Lepidoptera;Maniola jurtina;NA;0.012;Maniola jurtina;0.91755716175482;  
MN140246;Lepidoptera;Lycaena hippothoe;Lycaena hippothoe;NA;Lycaena hippothoe;0.995296610589267;  
MN140247;Lepidoptera;Lasiommata paramegaera;Lasiommata paramegaera;0.999;Lasiommata  
paramegaera;0.995283446287531;  
MN140248;Lepidoptera;Pieris napi;NA;0.011;Pieris napi;0.801985394724814;  
MN140250;Lepidoptera;Boloria euphrosyne;Boloria euphrosyne;1;Boloria  
euphrosyne;0.99999888858929;  
MN140251;Lepidoptera;Erebia eriphyle;Erebia eriphyle;1;Erebia eriphyle;0.999999983716066;  
MN140252;Lepidoptera;Melitaea cinxia;Melitaea cinxia;1;Melitaea cinxia;0.99999999999289;  
MN140253;Lepidoptera;Argynnis aglaja;NA;NA;Speyeria aglaja;0.872991147917853;  
MN140254;Lepidoptera;Brenthis daphne;Brenthis daphne;0.001;Brenthis daphne;0.997781825264304;  
MN140256;Lepidoptera;Polyommatus damon;Polyommatus damon;1;Polyommatus damon;0.999999921524452;  
MN140257;Lepidoptera;Apatura ilia;Apatura ilia;NA;Apatura ilia;0.988792300608896;  
MN140258;Lepidoptera;Coenonympha pamphilus;Coenonympha pamphilus;1;Coenonympha  
pamphilus;0.999999999999744;  
MN140259;Lepidoptera;Aricia cramera;Aricia cramera;1;Aricia cramera;0.999993731037033;  
MN140262;Lepidoptera;Pyrgus carlinae;NA;NA;Pyrgus carlinae;0.854199018204849;  
MN140263;Lepidoptera;Brenthis daphne;NA;0.186;Brenthis daphne;0.703003804838281;  
MN140264;Lepidoptera;Plebejus argus;Plebejus argus;0.016;Plebejus argus;0.962605109836459;  
MN140265;Lepidoptera;Aricia cramera;Aricia cramera;1;Aricia cramera;0.999993731037033;  
MN140266;Lepidoptera;Brenthis daphne;Brenthis daphne;0.999;Brenthis daphne;0.999440682835247;  
MN140267;Lepidoptera;Maniola cecilia;Pyronia cecilia;1;Pyronia cecilia;1;  
MN140268;Lepidoptera;Lasiommata maera;Lasiommata maera;0.001;Lasiommata maera;0.999981462505912;  
MN140269;Lepidoptera;Colias crocea;NA;0.059;NA;0.99999999999738;  
MN140270;Lepidoptera;Melanargia galathea;Melanargia galathea;0.001;Melanargia  
galathea;0.965001574126447;  
MN140273;Lepidoptera;Pieris napi;NA;0.011;Pieris napi;0.801985394724814;  
MN140274;Lepidoptera;Polyommatus icarus;Polyommatus icarus;0.001;Polyommatus  
icarus;0.999242418163017;  
MN140274;Lepidoptera;Polyommatus icarus;Polyommatus icarus;0.001;Polyommatus  
icarus;0.999242418163017;  
MN140275;Lepidoptera;Aricia eumedon;Eumedonia eumedon;0.002;Eumedonia eumedon;0.997793024117892;  
MN140276;Lepidoptera;Gonepteryx rhamni;NA;0.474;Gonepteryx rhamni;0.982076396127858;  
MN140278;Lepidoptera;Melitaea didyma;Melitaea didyma;0.021;Melitaea didyma;0.9742722334097;  
MN140279;Lepidoptera;Maniola jurtina;NA;0.012;Maniola jurtina;0.91755716175482;  
MN140280;Lepidoptera;Euphydryas cynthia;Euphydryas cynthia;1;Euphydryas  
cynthia;0.99999243242402;  
MN140281;Lepidoptera;Anthocharis damone;Anthocharis damone;1;Anthocharis  
damone;0.99999996610995;  
MN140282;Lepidoptera;Coenonympha pamphilus;Coenonympha pamphilus;1;Coenonympha  
pamphilus;0.999999999999744;  
MN140283;Lepidoptera;Vanessa atalanta;Vanessa atalanta;1;Vanessa atalanta;0.99999999757762;  
MN140284;Lepidoptera;Carterocephalus palaemon;NA;0.052;Carterocephalus  
palaemon;0.728445051795325;  
MN140286;Lepidoptera;Apatura ilia;NA;0.165;Apatura ilia;0.956796812031481;  
MN140289;Lepidoptera;Aricia eumedon;Eumedonia eumedon;0.002;Eumedonia eumedon;0.997793024117892;  
MN140290;Lepidoptera;Maniola jurtina;NA;0.157;Maniola jurtina;0.72935823378201;  
MN140292;Lepidoptera;Agriades orbitulus;NA;0.01;Agriades orbitulus;0.998991302227708;  
MN140293;Lepidoptera;Colias alfacariensis;Colias alfacariensis;1;Colias  
alfacariensis;0.999939067457475;  
MN140294;Lepidoptera;Colias crocea;NA;0.059;NA;0.99999999999738;  
MN140295;Lepidoptera;Coenonympha gardetta;NA;0.32;Coenonympha arcania;0.715629089660113;  
MN140296;Lepidoptera;Maniola jurtina;NA;0.175;Maniola jurtina;0.950174303242181;  
MN140297;Lepidoptera;Polyommatus icarus;NA;0.003;Polyommatus icarus;0.998191904408636;  
MN140297;Lepidoptera;Polyommatus icarus;NA;0.003;Polyommatus icarus;0.998191904408636;  
MN140298;Lepidoptera;Maniola jurtina;NA;0.003;Maniola jurtina;0.930461068589493;  
MN140299;Lepidoptera;Erebia pharte;Erebia pharte;1;Erebia pharte;0.9999999630495;  
MN140300;Lepidoptera;Aricia eumedon;Eumedonia eumedon;1;Eumedonia eumedon;0.99887319009208;

MN140301;Lepidoptera;Lysandra hispana;NA;NA;NA;0.991360562381433;  
MN140304;Lepidoptera;Argynnis paphia;Argynnis paphia;1;Argynnis paphia;0.999999990911675;  
MN140305;Lepidoptera;Aricia cramera;Aricia cramera;1;Aricia cramera;0.999993731037033;  
MN140306;Lepidoptera;Aricia artaxerxes;NA;0.001;Aricia artaxerxes;0.999429422213984;  
MN140307;Lepidoptera;Coenonympha pamphilus;Coenonympha pamphilus;1;Coenonympha  
pamphilus;0.99999999999744;  
MN140308;Lepidoptera;Lycaena tityrus;Lycaena tityrus;1;Lycaena tityrus;0.999998928238034;  
MN140309;Lepidoptera;Callophrys rubi;NA;0.003;Callophrys rubi;0.997328639918919;  
MN140310;Lepidoptera;Aricia cramera;Aricia cramera;1;Aricia cramera;0.999993731037033;  
MN140311;Lepidoptera;Arethusana arethusana;NA;0.062;Arethusana arethusana;0.999962489703143;  
MN140312;Lepidoptera;Thymelicus lineola;Thymelicus lineola;1;Thymelicus  
lineola;0.999995927238524;  
MN140314;Lepidoptera;Cupido argiades;NA;0.499;NA;0.999999999984682;  
MN140315;Lepidoptera;Aricia agestis;NA;0.113;Aricia agestis;0.99685250063917;  
MN140317;Lepidoptera;Erebia meolans;Erebia meolans;NA;Erebia meolans;0.999565582584285;  
MN140319;Lepidoptera;Vanessa atalanta;Vanessa atalanta;1;Vanessa atalanta;0.99999999757762;  
MN140320;Lepidoptera;Coenonympha pamphilus;Coenonympha pamphilus;1;Coenonympha  
pamphilus;0.99999999999886;  
MN140321;Lepidoptera;Lasiommata maera;Lasiommata maera;1;Lasiommata maera;0.999988599344549;  
MN140322;Lepidoptera;Erebia medusa;NA;0.002;Erebia medusa;0.991052367627986;  
MN140324;Lepidoptera;Vanessa cardui;Vanessa cardui;1;Vanessa cardui;0.99999459983318;  
MN140325;Lepidoptera;Aglais urticae;NA;0.002;Aglais urticae;0.987497593219019;  
MN140326;Lepidoptera;Fabriciana niobe;Fabriciana niobe;0.001;Fabriciana niobe;0.93186202957215;  
MN140327;Lepidoptera;Lycaena dispar;Lycaena dispar;1;Lycaena dispar;0.99999990743959;  
MN140328;Lepidoptera;Polyommatus dorylas;Polyommatus dorylas;0.005;Polyommatus  
dorylas;0.987518562410738;  
MN140329;Lepidoptera;Aphantopus hyperantus;Aphantopus hyperantus;1;Aphantopus  
hyperantus;0.999999677131849;  
MN140330;Lepidoptera;Celastrina argiolus;Celastrina argiolus;1;Celastrina  
argiolus;0.999527385150531;  
MN140335;Lepidoptera;Celastrina argiolus;Celastrina argiolus;1;Celastrina  
argiolus;0.999527385150531;  
MN140336;Lepidoptera;Colias crocea;NA;0.059;NA;0.99999999999738;  
MN140337;Lepidoptera;Cupido alcetas;NA;0.218;Cupido alcetas;0.833501983138177;  
MN140338;Lepidoptera;Glaucopsyche alexis;Glaucopsyche alexis;NA;Glaucopsyche  
alexis;0.963341895524591;  
MN140339;Lepidoptera;Polyommatus dorylas;Polyommatus dorylas;0.008;Polyommatus  
dorylas;0.98570396564071;  
MN140341;Lepidoptera;Maniola jurtina;NA;0.001;Maniola jurtina;0.939220105860875;  
MN140342;Lepidoptera;Aporia crataegi;NA;NA;Aporia crataegi;0.999998459680561;  
MN140343;Lepidoptera;Chazara briseis;Chazara briseis;0.001;Chazara briseis;0.999987492373468;  
MN140344;Lepidoptera;Polyommatus celina;Polyommatus celina;1;Polyommatus  
celina;0.999999997901256;  
MN140345;Lepidoptera;Colias crocea;NA;0.059;NA;0.99999999999738;  
MN140346;Lepidoptera;Maniola jurtina;NA;0.147;Maniola jurtina;0.955259384450175;  
MN140347;Lepidoptera;Thymelicus sylvestris;Thymelicus sylvestris;1;Thymelicus  
sylvestris;0.99999985935205;  
MN140351;Lepidoptera;Celastrina argiolus;Celastrina argiolus;1;Celastrina  
argiolus;0.999527385150531;  
MN140353;Lepidoptera;Aricia cramera;Aricia cramera;1;Aricia cramera;0.999993731037033;  
MN140354;Lepidoptera;Cupido osiris;Cupido osiris;1;Cupido osiris;0.99999834740279;  
MN140355;Lepidoptera;Favonius quercus;NA;NA;Favonius quercus;0.73046069582187;  
MN140356;Lepidoptera;Polyommatus dolus;Polyommatus dolus;0.004;Polyommatus  
dolus;0.876833853168453;  
MN140357;Lepidoptera;Maniola jurtina;NA;0.001;Maniola jurtina;0.939220105860875;  
MN140358;Lepidoptera;Lampides boeticus;Lampides boeticus;1;Lampides boeticus;0.99999999545906;  
MN140361;Lepidoptera;Melitaea cinxia;Melitaea cinxia;1;Melitaea cinxia;0.99999999999318;  
MN140363;Lepidoptera;Glaucopsyche melanops;Glaucopsyche melanops;1;Glaucopsyche  
melanops;0.999952924254607;  
MN140364;Lepidoptera;Pyrgus malvoides;NA;0.176;Pyrgus malvoides;0.940490890379026;  
MN140365;Lepidoptera;Maniola jurtina;NA;0.012;Maniola jurtina;0.91755716175482;  
MN140368;Lepidoptera;Erebia medusa;NA;0.009;Erebia medusa;0.986275612856827;  
MN140372;Lepidoptera;Lysandra coridon;NA;NA;NA;0.998070184737648;  
MN140373;Lepidoptera;Anthocharis cardamines;Anthocharis cardamines;1;Anthocharis  
cardamines;0.99999986506026;  
MN140375;Lepidoptera;Erebia meolans;Erebia meolans;NA;Erebia meolans;0.999835953426128;  
MN140376;Lepidoptera;Pyrgus armoricus;Pyrgus armoricus;1;Pyrgus  
armoricus;0.999998858647755;  
MN140377;Lepidoptera;Aphantopus hyperantus;Aphantopus hyperantus;0.006;Aphantopus  
hyperantus;0.999998615504572;  
MN140378;Lepidoptera;Hipparchia hermione;Hipparchia hermione;1;Hipparchia  
hermione;0.999791304970896;  
MN140381;Lepidoptera;Polyommatus amandus;Polyommatus amandus;1;Polyommatus  
amandus;0.999993368166194;  
MN140383;Lepidoptera;Aricia agestis;NA;0.067;Aricia agestis;0.999509743227786;  
MN140384;Lepidoptera;Colias alfacariensis;Colias alfacariensis;1;Colias  
alfacariensis;0.999986994131001;  
MN140385;Lepidoptera;Maniola jurtina;NA;0.012;Maniola jurtina;0.91755716175482;

MN140386;Lepidoptera;Coenonympha pamphilus;Coenonympha pamphilus;1;Coenonympha  
pamphilus;0.999999999999744;  
MN140387;Lepidoptera;Lycaena tityrus;Lycaena tityrus;1;Lycaena tityrus;0.999997855580031;  
MN140388;Lepidoptera;Maniola jurtina;NA;0.001;Maniola jurtina;0.939220105860875;  
MN140389;Lepidoptera;Fabriciana niobe;Fabriciana niobe;0.001;Fabriciana niobe;0.93186202957215;  
MN140392;Lepidoptera;Erynnis tages;Erynnis tages;1;Erynnis tages;0.999999281987018;  
MN140393;Lepidoptera;Coenonympha pamphilus;Coenonympha pamphilus;1;Coenonympha  
pamphilus;0.999999999999744;  
MN140394;Lepidoptera;Satyrium acaciae;Satyrium acaciae;1;Satyrium acaciae;0.999999374890702;  
MN140396;Lepidoptera;Nymphalis c-album;NA;0.215;NA;0.999999192918557;  
MN140397;Lepidoptera;Melitaea trivia;Melitaea trivia;1;Melitaea trivia;0.999999999970555;  
MN140399;Lepidoptera;Hipparchia fagi;NA;NA;Hipparchia fagi;0.960942485014654;  
MN140400;Lepidoptera;Maniola jurtina;NA;NA;Maniola jurtina;0.951668238126128;  
MN140401;Lepidoptera;Colias alfacariensis;Colias alfacariensis;0.001;Colias  
alfacariensis;0.999926026317526;  
MN140402;Lepidoptera;Pyrgus serratulae;Pyrgus serratulae;1;Pyrgus serratulae;0.99999989567508;  
MN140405;Lepidoptera;Satyrium esculi;Satyrium esculi;1;Satyrium esculi;0.999999957367948;  
MN140407;Lepidoptera;Cupido argiades;NA;0.499;NA;0.99999999984682;  
MN140408;Lepidoptera;Carcharodus alceae;Carcharodus alceae;1;Carcharodus  
alceae;0.99999998465938;  
MN140409;Lepidoptera;Colias alfacariensis;Colias alfacariensis;0.001;Colias  
alfacariensis;0.999926245067755;  
MN140412;Lepidoptera;Hipparchia fagi;Hipparchia fagi;NA;Hipparchia fagi;0.981068649813775;  
MN140413;Lepidoptera;Satyrium w-album;NA;0.056;Satyrium w-album;0.989378230996316;  
MN140416;Lepidoptera;Aporia crataegi;NA;NA;Aporia crataegi;0.999996781126733;  
MN140417;Lepidoptera;Ochlodes sylvanus;NA;0.316;Ochlodes sylvanus;0.996318754838625;  
MN140418;Lepidoptera;Aphantopus hyperantus;Aphantopus hyperantus;0.006;Aphantopus  
hyperantus;0.999998615504572;  
MN140419;Lepidoptera;Lycaena phlaeas;Lycaena phlaeas;1;Lycaena phlaeas;0.9999999308983;  
MN140420;Lepidoptera;Glaucopsyche alexis;NA;NA;Glaucopsyche alexis;0.991019528246159;  
MN140421;Lepidoptera;Carterocephalus palaemon;NA;0.052;Carterocephalus  
palaemon;0.728445051795325;  
MN140422;Lepidoptera;Anthocharis damone;Anthocharis damone;1;Anthocharis  
damone;0.99999991170057;  
MN140424;Lepidoptera;Boloria euphrosyne;Boloria euphrosyne;0.001;Boloria  
euphrosyne;0.999985640170951;  
MN140426;Lepidoptera;Parnassius apollo;Parnassius apollo;1;Parnassius apollo;0.992704703916692;  
MN140427;Lepidoptera;Lysandra coridon;NA;NA;NA;0.9980701847373648;  
MN140429;Lepidoptera;Polyommatus damon;Polyommatus damon;1;Polyommatus damon;0.999999878117855;  
MN140431;Lepidoptera;Hipparchia hermione;NA;NA;NA;0.999999999999991;  
MN140432;Lepidoptera;Aglaia urticae;NA;0.002;Aglaia urticae;0.987497593219019;  
MN140433;Lepidoptera;Lysandra coridon;Lysandra coridon;NA;Lysandra coridon;0.931719578492241;  
MN140435;Lepidoptera;Pyrgus serratulae;Pyrgus serratulae;1;Pyrgus serratulae;0.99999989567508;  
MN140439;Lepidoptera;Melitaea cinxia;Melitaea cinxia;1;Melitaea cinxia;0.99999999999204;  
MN140440;Lepidoptera;Brenthis daphne;Brenthis daphne;0.998;Brenthis daphne;0.998207407614684;  
MN140444;Lepidoptera;Vanessa cardui;Vanessa cardui;1;Vanessa cardui;0.999999803450484;  
MN140445;Lepidoptera;Maniola jurtina;NA;NA;Maniola jurtina;0.950689021412593;  
MN140448;Lepidoptera;Hipparchia fagi;Hipparchia fagi;NA;Hipparchia fagi;0.986566456150817;  
MN140449;Lepidoptera;Glaucopsyche alexis;Glaucopsyche alexis;0.001;Glaucopsyche  
alexis;0.94042380088325;  
MN140450;Lepidoptera;Euphydryas aurinia;NA;0.31;Euphydryas aurinia;0.993387708761386;  
MN140451;Lepidoptera;Polyommatus icarus;NA;0.001;NA;0.999994270558956;  
MN140451;Lepidoptera;Polyommatus icarus;NA;0.001;NA;0.999994270558956;  
MN140453;Lepidoptera;Coenonympha dorus;Coenonympha dorus;1;Coenonympha dorus;0.99999999988259;  
MN140454;Lepidoptera;Pieris napi;NA;0.028;Pieris napi;0.888205720664699;  
MN140455;Lepidoptera;Lampides boeticus;Lampides boeticus;1;Lampides boeticus;0.99999999545906;  
MN140459;Lepidoptera;Pieris napi;NA;NA;Pieris napi;0.896177367075973;  
MN140460;Lepidoptera;Arethusana arethusa;Arethusana arethusa;0.008;Arethusana  
arethusa;0.999972993005957;  
MN140462;Lepidoptera;Boloria selene;NA;0.179;Boloria selene;0.999999092153374;  
MN140463;Lepidoptera;Maniola jurtina;NA;0.008;Maniola jurtina;0.881964271783318;  
MN140465;Lepidoptera;Celastrina argiolus;Celastrina argiolus;1;Celastrina  
argiolus;0.999185496292995;  
MN140466;Lepidoptera;Callophrys rubi;NA;0.003;Callophrys rubi;0.997328639918919;  
MN140467;Lepidoptera;Melitaea didyma;Melitaea didyma;1;Melitaea didyma;0.997360676186264;  
MN140468;Lepidoptera;Maniola jurtina;NA;NA;Maniola jurtina;0.951668238126128;  
MN140469;Lepidoptera;Lampides boeticus;Lampides boeticus;1;Lampides boeticus;0.99999999545906;  
MN140470;Lepidoptera;Maniola jurtina;NA;0.001;Maniola jurtina;0.939220105860875;  
MN140471;Lepidoptera;Thymelicus lineola;Thymelicus lineola;1;Thymelicus  
lineola;0.999995927238524;  
MN140474;Lepidoptera;Aricia agestis;NA;0.253;Aricia agestis;0.996350017387504;  
MN140475;Lepidoptera;Aricia cramera;Aricia cramera;1;Aricia cramera;0.999993731037033;  
MN140477;Lepidoptera;Aricia cramera;Aricia cramera;1;Aricia cramera;0.999992229282534;  
MN140478;Lepidoptera;Hipparchia semele;NA;0.001;Hipparchia semele;0.824269221281445;  
MN140479;Lepidoptera;Pyrgus foulquieri;NA;NA;Pyrgus alveus;0.827119616974978;  
MN140480;Lepidoptera;Aglaia urticae;NA;0.002;Aglaia urticae;0.987497593219019;  
MN140481;Lepidoptera;Erebia pharte;Erebia pharte;1;Erebia pharte;0.9999999630495;



MN140482;Lepidoptera;Polyommatus daphnis;Polyommatus daphnis;1;Polyommatus daphnis;0.999946618182486;  
 MN140483;Lepidoptera;Argynnis paphia;Argynnis paphia;1;Argynnis paphia;0.999999993686771;  
 MN140484;Lepidoptera;Carcharodus alceae;Carcharodus alceae;0.999;Carcharodus alceae;0.999999998008462;  
 MN140485;Lepidoptera;Aricia cramera;Aricia cramera;1;Aricia cramera;0.999993731037033;  
 MN140487;Lepidoptera;Pieris napi;NA;0.028;Pieris napi;0.888205720664699;  
 MN140488;Lepidoptera;Lycaena alciphron;Lycaena alciphron;1;Lycaena alciphron;0.999999903149648;  
 MN140489;Lepidoptera;Boloria dia;Boloria dia;1;Boloria dia;0.99999999986613;  
 MN140491;Lepidoptera;Coenonympha oedippus;Coenonympha oedippus;1;Coenonympha oedippus;0.99999999999943;  
 MN140492;Lepidoptera;Vanessa cardui;Vanessa cardui;1;Vanessa cardui;0.999999459983318;  
 MN140494;Lepidoptera;Hipparchia aristaeus;Hipparchia aristaeus;1;Hipparchia aristaeus;0.99999998958458;  
 MN140496;Lepidoptera;Brenthis daphne;Brenthis daphne;0.006;Brenthis daphne;0.984559944066479;  
 MN140498;Lepidoptera;Arethusana arethusa;Arethusana arethusa;0.033;Arethusana arethusa;0.999959591411034;  
 MN140500;Lepidoptera;Anthocharis cardamines;Anthocharis cardamines;1;Anthocharis cardamines;0.999999934410001;  
 MN140501;Lepidoptera;Ochlodes sylvanus;NA;0.316;Ochlodes sylvanus;0.996318754838625;  
 MN140502;Lepidoptera;Argynnis aglaja;NA;NA;Speyeria aglaja;0.872991147917853;  
 MN140503;Lepidoptera;Erebia cassioides;NA;NA;NA;0.99999999999875;  
 MN140505;Lepidoptera;Maniola jurtina;NA;0.008;Maniola jurtina;0.881964271783318;  
 MN140506;Lepidoptera;Vanessa cardui;Vanessa cardui;1;Vanessa cardui;0.999999459983318;  
 MN140508;Lepidoptera;Aricia artaxerxes;NA;0.139;Aricia artaxerxes;0.999594219786776;  
 MN140509;Lepidoptera;Aphantopus hyperantus;Aphantopus hyperantus;0.006;Aphantopus hyperantus;0.999998615504572;  
 MN140512;Lepidoptera;Satyrus actaea;Satyrus actaea;0.01;Satyrus actaea;0.94366382029787;  
 MN140514;Lepidoptera;Aricia agestis;NA;0.081;Aricia agestis;0.998857812762894;  
 MN140515;Lepidoptera;Ochlodes sylvanus;NA;0.316;Ochlodes sylvanus;0.996318754838625;  
 MN140516;Lepidoptera;Lycaena tityrus;Lycaena tityrus;1;Lycaena tityrus;0.99999828238034;  
 MN140519;Lepidoptera;Polyommatus celina;Polyommatus celina;1;Polyommatus celina;0.99999999666926;  
 MN140521;Lepidoptera;Lycaena virgaureae;NA;0.463;Lycaena virgaureae;0.998978647124085;  
 MN140522;Lepidoptera;Pieris napi;NA;0.001;Pieris napi;0.869484797213931;  
 MN140523;Lepidoptera;Polyommatus dorylas;Polyommatus dorylas;0.025;Polyommatus dorylas;0.973229109265438;  
 MN140524;Lepidoptera;Hipparchia semele;NA;0.001;Hipparchia semele;0.887463969237647;  
 MN140526;Lepidoptera;Pieris napi;NA;0.028;Pieris napi;0.888205720664699;  
 MN140528;Lepidoptera;Erebia styx;NA;NA;Erebia styx;0.946491813354197;  
 MN140529;Lepidoptera;Parnassius apollo;Parnassius apollo;1;Parnassius apollo;0.996164492145035;  
 MN140531;Lepidoptera;Aglais urticae;Aglais urticae;0.001;Aglais urticae;0.994396335177485;  
 MN140534;Lepidoptera;Plebejus argus;Plebejus argus;0.016;Plebejus argus;0.962605109836459;  
 MN140536;Lepidoptera;Colias alfacariensis;Colias alfacariensis;0.001;Colias alfacariensis;0.999926026317526;  
 MN140537;Lepidoptera;Aglais urticae;NA;0.002;Aglais urticae;0.987497593219019;  
 MN140539;Lepidoptera;Arethusana arethusa;NA;0.062;Arethusana arethusa;0.999962489703143;  
 MN140541;Lepidoptera;Lycaena virgaureae;NA;0.184;Lycaena virgaureae;0.999653824584039;  
 MN140543;Lepidoptera;Colias crocea;NA;0.059;NA;0.99999999999738;  
 MN140544;Lepidoptera;Cupido minimus;NA;0.006;Cupido minimus;0.999768371759258;  
 MN140545;Lepidoptera;Aporia crataegi;NA;NA;Aporia crataegi;0.999997860566808;  
 MN140546;Lepidoptera;Gonepteryx cleopatra;Gonepteryx cleopatra;0.998;Gonepteryx cleopatra;0.999118636582266;  
 MN140548;Lepidoptera;Aricia cramera;Aricia cramera;1;Aricia cramera;0.999993731037033;  
 MN140549;Lepidoptera;Colias crocea;NA;0.059;NA;0.99999999999738;  
 MN140550;Lepidoptera;Coenonympha pamphilus;Coenonympha pamphilus;1;Coenonympha pamphilus;0.99999999999744;  
 MN140551;Lepidoptera;Cupido alcetas;NA;0.218;Cupido alcetas;0.833501983138177;  
 MN140552;Lepidoptera;Papilio machaon;Papilio machaon;0.003;Papilio machaon;0.998739556051929;  
 MN140553;Lepidoptera;Colias crocea;NA;0.059;NA;0.99999999999738;  
 MN140554;Lepidoptera;Maniola jurtina;NA;NA;Maniola jurtina;0.962368106146462;  
 MN140555;Lepidoptera;Thymelicus sylvestris;Thymelicus sylvestris;1;Thymelicus sylvestris;0.999999981568351;  
 MN140556;Lepidoptera;Cupido osiris;Cupido osiris;1;Cupido osiris;0.999999791352473;  
 MN140558;Lepidoptera;Pyrgus malvoides;NA;0.167;Pyrgus malvoides;0.940320745704742;  
 MN140559;Lepidoptera;Colias palaeno;Colias palaeno;0.001;NA;0.99999999992202;  
 MN140560;Lepidoptera;Plebejus argus;Plebejus argus;0.013;Plebejus argus;0.99029909759821;  
 MN140561;Lepidoptera;Pieris napi;NA;0.028;Pieris napi;0.888205720664699;  
 MN140562;Lepidoptera;Maniola cecilia;Pyronia cecilia;1;Pyronia cecilia;1;  
 MN140563;Lepidoptera;Vanessa cardui;Vanessa cardui;1;Vanessa cardui;0.999991578978624;  
 MN140566;Lepidoptera;Plebejus idas;NA;0.002;NA;0.99959062880967;  
 MN140567;Lepidoptera;Cupido osiris;Cupido osiris;1;Cupido osiris;0.999995435613969;  
 MN140568;Lepidoptera;Pieris napi;NA;0.011;Pieris napi;0.801985394724814;  
 MN140569;Lepidoptera;Argynnis aglaja;NA;NA;Speyeria aglaja;0.872991147917853;  
 MN140570;Lepidoptera;Aglais urticae;NA;0.002;Aglais urticae;0.987497593219019;  
 MN140571;Lepidoptera;Aglais urticae;NA;0.002;Aglais urticae;0.987497593219019;  
 MN140574;Lepidoptera;Pieris napi;NA;0.003;Pieris napi;0.841488404403525;  
 MN140576;Lepidoptera;Plebejus argus;NA;0.048;Plebejus argus;0.985619685577692;

MN140577;Lepidoptera;Colias hyale;Colias hyale;0.015;Colias hyale;0.999997884296128;  
MN140578;Lepidoptera;Lysandra coridon;NA;NA;Lysandra coridon;0.72097638065991;  
MN140579;Lepidoptera;Minois dryas;NA;0.025;Minois dryas;0.850746026247397;  
MN140580;Lepidoptera;Pyrgus serratulae;Pyrgus serratulae;1;Pyrgus serratulae;0.99999807446234;  
MN140581;Lepidoptera;Hipparchia semele;NA;0.001;Hipparchia semele;0.882394980075983;  
MN140584;Lepidoptera;Argynnis aglaja;NA;NA;Speyeria aglaja;0.872991147917853;  
MN140585;Lepidoptera;Gonepteryx rhamni;NA;0.474;Gonepteryx rhamni;0.982076396127858;  
MN140587;Lepidoptera;Polyommatus dorylas;NA;0.004;Polyommatus dorylas;0.973574185045329;  
MN140588;Lepidoptera;Argynnis paphia;Argynnis paphia;1;Argynnis paphia;0.99999991389927;  
MN140589;Lepidoptera;Hipparchia fagi;Hipparchia fagi;NA;Hipparchia fagi;0.986566456150817;  
MN140594;Lepidoptera;Melitaea didyma;Melitaea didyma;1;Melitaea didyma;0.999429129005203;  
MN140591;Lepidoptera;Aricia agestis;NA;0.253;Aricia agestis;0.996350017387504;  
MN140592;Lepidoptera;Pieris napi;NA;0.028;Pieris napi;0.888205720664699;  
MN140593;Lepidoptera;Aporia crataegi;NA;NA;Aporia crataegi;0.999996781126733;  
MN140594;Lepidoptera;Pieris napi;NA;0.011;Pieris napi;0.801985394724814;  
MN140595;Lepidoptera;Aricia cramera;Aricia cramera;1;Aricia cramera;0.999995130925017;  
MN140596;Lepidoptera;Fabriciana niobe;Fabriciana niobe;0.001;Fabriciana niobe;0.93186202957215;  
MN140597;Lepidoptera;Melitaea didyma;Melitaea didyma;1;Melitaea didyma;0.9999226971447;  
MN140598;Lepidoptera;Erebia pluto;Erebia pluto;1;Erebia pluto;0.99999977588772;  
MN140599;Lepidoptera;Polyommatus icarus;NA;0.013;Polyommatus icarus;0.809997132735827;  
MN140599;Lepidoptera;Polyommatus icarus;NA;0.013;Polyommatus icarus;0.809997132735827;  
MN140600;Lepidoptera;Satyrus ferula;Satyrus ferula;0.001;Satyrus ferula;0.992107254386621;  
MN140603;Lepidoptera;Lysandra coridon;NA;NA;NA;0.998017994491822;  
MN140604;Lepidoptera;Maniola jurtina;NA;0.07;Maniola jurtina;0.968492444409788;  
MN140605;Lepidoptera;Maniola cecilia;Pyronia cecilia;NA;Pyronia cecilia;0.99999999999972;  
MN140607;Lepidoptera;Polyommatus amandus;Polyommatus amandus;0.002;Polyommatus amandus;0.999980796628209;  
MN140609;Lepidoptera;Pieris napi;NA;0.028;Pieris napi;0.888205720664699;  
MN140611;Lepidoptera;Argynnis aglaja;NA;NA;Speyeria aglaja;0.872991147917853;  
MN140612;Lepidoptera;Carcharodus lavatherae;NA;0.221;Carcharodus lavatherae;0.997497103905344;  
MN140613;Lepidoptera;Cyaniris semiargus;Cyaniris semiargus;NA;Cyaniris semiargus;0.999813148264808;  
MN140614;Lepidoptera;Plebejus idas;NA;0.007;NA;0.999546324331549;  
MN140615;Lepidoptera;Brintesia circe;Brintesia circe;1;Brintesia circe;0.999999586895285;  
MN140616;Lepidoptera;Gegenes pumilio;Gegenes pumilio;1;Gegenes pumilio;0.999986726679266;  
MN140618;Lepidoptera;Aporia crataegi;NA;NA;Aporia crataegi;0.999996781126733;  
MN140620;Lepidoptera;Pyrgus malvoides;NA;0.052;Pyrgus malvoides;0.943208768333892;  
MN140621;Lepidoptera;Vanessa atalanta;Vanessa atalanta;1;Vanessa atalanta;0.99999999757762;  
MN140622;Lepidoptera;Thymelicus sylvestris;NA;0.321;Thymelicus sylvestris;0.999953344764614;  
MN140623;Lepidoptera;Plebejus argus;NA;0.328;Plebejus argus;0.969789734199889;  
MN140627;Lepidoptera;Lycaena phlaeas;Lycaena phlaeas;1;Lycaena phlaeas;0.99999996363186;  
MN140628;Lepidoptera;Vanessa cardui;Vanessa cardui;1;Vanessa cardui;0.999997579965112;  
MN140630;Lepidoptera;Lampides boeticus;Lampides boeticus;1;Lampides boeticus;0.99999999545906;  
MN140631;Lepidoptera;Thymelicus lineola;Thymelicus lineola;1;Thymelicus lineola;0.999971535093703;  
MN140632;Lepidoptera;Coenonympha pamphilus;Coenonympha pamphilus;1;Coenonympha pamphilus;0.99999999999744;  
MN140633;Lepidoptera;Polyommatus icarus;Polyommatus icarus;0.001;Polyommatus icarus;0.999851522482238;  
MN140633;Lepidoptera;Polyommatus icarus;Polyommatus icarus;0.001;Polyommatus icarus;0.999851522482238;  
MN140634;Lepidoptera;Nymphalis c-album;NA;0.215;NA;0.999999192918557;  
MN140635;Lepidoptera;Pyrgus serratulae;Pyrgus serratulae;1;Pyrgus serratulae;0.99999877361184;  
MN140637;Lepidoptera;Colias alfacariensis;Colias alfacariensis;0.001;Colias alfacariensis;0.999857790810452;  
MN140638;Lepidoptera;Polyommatus icarus;Polyommatus icarus;0.002;Polyommatus icarus;0.999653930279044;  
MN140638;Lepidoptera;Polyommatus icarus;Polyommatus icarus;0.002;Polyommatus icarus;0.999653930279044;  
MN140640;Lepidoptera;Vanessa cardui;Vanessa cardui;1;Vanessa cardui;0.999999459983318;  
MN140641;Lepidoptera;Coenonympha arcania;NA;0.172;Coenonympha arcania;0.963036309473038;  
MN140642;Lepidoptera;Melitaea trivia;Melitaea trivia;1;Melitaea trivia;0.9999999977604;  
MN140643;Lepidoptera;Erynnis tages;Erynnis tages;1;Erynnis tages;0.99999281987018;  
MN140644;Lepidoptera;Plebejus argus;Plebejus argus;0.013;Plebejus argus;0.9902990759821;  
MN140645;Lepidoptera;Gonepteryx cleopatra;Gonepteryx cleopatra;0.998;Gonepteryx cleopatra;0.999118636582266;  
MN140647;Lepidoptera;Pyrgus cacaliae;Pyrgus cacaliae;0.001;Pyrgus cacaliae;0.997779968725098;  
MN140649;Lepidoptera;Pieris napi;NA;0.011;Pieris napi;0.801985394724814;  
MN140652;Lepidoptera;Maniola cecilia;Pyronia cecilia;NA;Pyronia cecilia;1;  
MN140653;Lepidoptera;Erebia nivalis;NA;NA;NA;0.99999999999947;  
MN140654;Lepidoptera;Ochlodes sylvanus;NA;0.119;Ochlodes sylvanus;0.997373902608318;  
MN140656;Lepidoptera;Maniola nurag;Maniola nurag;1;Maniola nurag;0.94592398344326;  
MN140657;Lepidoptera;Vanessa atalanta;Vanessa atalanta;1;Vanessa atalanta;0.99999999501853;  
MN140661;Lepidoptera;Polyommatus damon;Polyommatus damon;1;Polyommatus damon;0.99999897832231;  
MN140664;Lepidoptera;Lasiommata maera;Lasiommata maera;1;Lasiommata maera;0.99999683404287;  
MN140665;Lepidoptera;Lycaena virgaureae;NA;0.186;Lycaena virgaureae;0.999491227342155;  
MN140666;Lepidoptera;Fabriciana niobe;NA;0.005;Fabriciana niobe;0.992125835358755;  
MN140667;Lepidoptera;Ochlodes sylvanus;NA;0.121;Ochlodes sylvanus;0.997242099793337;

MN140668;Lepidoptera;Thymelicus sylvestris;Thymelicus sylvestris;1;Thymelicus sylvestris;0.99999985214032;  
MN140669;Lepidoptera;Pieris napi;NA;0.011;Pieris napi;0.801985394724814;  
MN140670;Lepidoptera;Cyraniris semiargus;NA;NA;Cyraniris semiargus;0.999051841766953;  
MN140672;Lepidoptera;Boloria euphrosyne;Boloria euphrosyne;1;Boloria euphrosyne;0.999998621448425;  
MN140675;Lepidoptera;Cyraniris semiargus;Cyraniris semiargus;NA;Cyraniris semiargus;0.999804935442027;  
MN140677;Lepidoptera;Callophrys rubi;NA;0.001;Callophrys rubi;0.99870518510598;  
MN140678;Lepidoptera;Glaucopsyche alexis;Glaucopsyche alexis;0.001;Glaucopsyche alexis;0.94042380088325;  
MN140681;Lepidoptera;Polyommatus icarus;Polyommatus icarus;0.007;Polyommatus icarus;0.999507484826389;  
MN140681;Lepidoptera;Polyommatus icarus;Polyommatus icarus;0.007;Polyommatus icarus;0.999507484826389;  
MN140683;Lepidoptera;Thymelicus sylvestris;Thymelicus sylvestris;1;Thymelicus sylvestris;0.99999984752464;  
MN140684;Lepidoptera;Aporia crataegi;NA;0.003;Aporia crataegi;0.999998656079776;  
MN140685;Lepidoptera;Lycaena virgaureae;NA;0.186;Lycaena virgaureae;0.999491227342155;  
MN140687;Lepidoptera;Erynnis tages;Erynnis tages;1;Erynnis tages;0.999999281987018;  
MN140688;Lepidoptera;Polyommatus daphnis;Polyommatus daphnis;1;Polyommatus daphnis;0.999626942892628;  
MN140689;Lepidoptera;Araschnia levana;Araschnia levana;1;Araschnia levana;0.999999772187832;  
MN140691;Lepidoptera;Erebia pronoe;Erebia pronoe;1;Erebia pronoe;0.999250891771858;  
MN140692;Lepidoptera;Glaucopsyche melanops;Glaucopsyche melanops;1;Glaucopsyche melanops;0.999952924254607;  
MN140693;Lepidoptera;Cupido minimus;NA;0.001;Cupido minimus;0.999803920701362;  
MN140694;Lepidoptera;Lycaena tityrus;Lycaena tityrus;1;Lycaena tityrus;0.999995729087172;  
MN140696;Lepidoptera;Vanessa cardui;Vanessa cardui;1;Vanessa cardui;0.999991578978624;  
MN140700;Lepidoptera;Maniola jurtina;Maniola jurtina;NA;Maniola jurtina;0.987213863396895;  
MN140701;Lepidoptera;Pieris napi;NA;0.011;Pieris napi;0.801985394724814;  
MN140702;Lepidoptera;Cyraniris semiargus;NA;NA;Cyraniris semiargus;0.999051841766953;  
MN140703;Lepidoptera;Lycaena phlaeas;Lycaena phlaeas;1;Lycaena phlaeas;0.99999993939099;  
MN140704;Lepidoptera;Vanessa atalanta;Vanessa atalanta;1;Vanessa atalanta;0.99999999757762;  
MN140705;Lepidoptera;Erebia tyndarus;NA;NA;NA;0.999999999999721;  
MN140706;Lepidoptera;Erebia meolans;Erebia meolans;NA;Erebia meolans;0.999835953426128;  
MN140707;Lepidoptera;Fabriciana niobe;NA;0.005;Fabriciana niobe;0.992125835358755;  
MN140708;Lepidoptera;Agriades glandon;NA;0.002;Agriades glandon;0.987189585708506;  
MN140709;Lepidoptera;Aricia cramera;Aricia cramera;1;Aricia cramera;0.99993731037033;  
MN140710;Lepidoptera;Maniola jurtina;NA;0.012;Maniola jurtina;0.91755716175482;  
MN140711;Lepidoptera;Polyommatus eros;NA;0.005;Polyommatus eros;0.95275169203039;  
MN140712;Lepidoptera;Coenonympha pamphilus;Coenonympha pamphilus;1;Coenonympha pamphilus;0.999999999999744;  
MN140713;Lepidoptera;Fabriciana niobe;Fabriciana niobe;0.001;Fabriciana niobe;0.93186202957215;  
MN140714;Lepidoptera;Arethusana arethusa;NA;0.153;Arethusana arethusa;0.999652039046744;  
MN140715;Lepidoptera;Cupido argiades;NA;0.499;NA;0.999999999984682;  
MN140717;Lepidoptera;Lycaena phlaeas;Lycaena phlaeas;1;Lycaena phlaeas;0.9999999340352;  
MN140718;Lepidoptera;Celastrina argiolus;Celastrina argiolus;1;Celastrina argiolus;0.999527385150531;  
MN140719;Lepidoptera;Ochlodes sylvanus;NA;0.316;Ochlodes sylvanus;0.996318754838625;  
MN140720;Lepidoptera;Pyrgus malvoides;NA;0.076;Pyrgus malvoides;0.887854315566122;  
MN140721;Lepidoptera;Erebia melampus;Erebia melampus;0.011;Erebia melampus;0.975499903768874;  
MN140722;Lepidoptera;Lasiommata maera;Lasiommata maera;1;Lasiommata maera;0.999996552555305;  
MN140723;Lepidoptera;Aricia artaxerxes;NA;0.394;Aricia artaxerxes;0.999502890976379;  
MN140725;Lepidoptera;Coenonympha glycerion;NA;0.213;Coenonympha glycerion;0.999998402638365;  
MN140727;Lepidoptera;Celastrina argiolus;Celastrina argiolus;1;Celastrina argiolus;0.999527385150531;  
MN140729;Lepidoptera;Aporia crataegi;NA;NA;Aporia crataegi;0.999989613886149;  
MN140731;Lepidoptera;Carcharodus alceae;Carcharodus alceae;0.996;Carcharodus alceae;0.999999976440904;  
MN140732;Lepidoptera;Erebia euryale;NA;NA;Erebia euryale;0.945887149341484;  
MN140733;Lepidoptera;Cupido minimus;NA;0.009;Cupido minimus;0.999791453712643;  
MN140735;Lepidoptera;Pyrgus armoricanus;Pyrgus armoricanus;1;Pyrgus armoricanus;0.999997353848817;  
MN140736;Lepidoptera;Boloria selene;NA;0.107;Boloria selene;0.999999824620305;  
MN140737;Lepidoptera;Pyrgus onopordi;Pyrgus onopordi;1;Pyrgus onopordi;0.99999711229755;  
MN140738;Lepidoptera;Euphydryas aurinia;NA;0.31;Euphydryas aurinia;0.993387708761386;  
MN140739;Lepidoptera;Brintesia circe;Brintesia circe;1;Brintesia circe;0.99999969821626;  
MN140741;Lepidoptera;Celastrina argiolus;Celastrina argiolus;1;Celastrina argiolus;0.999527385150531;  
MN140742;Lepidoptera;Polyommatus dorylas;Polyommatus dorylas;0.008;Polyommatus dorylas;0.991281865899703;  
MN140743;Lepidoptera;Minois dryas;NA;0.025;Minois dryas;0.850746026247397;  
MN140745;Lepidoptera;Colias alfacariensis;Colias alfacariensis;0.001;Colias alfacariensis;0.999926026317526;  
MN140750;Lepidoptera;Thymelicus acteon;Thymelicus acteon;1;Thymelicus acteon;0.9999999752248;  
MN140752;Lepidoptera;Euphydryas intermedia;NA;NA;NA;0.99999999996973;  
MN140753;Lepidoptera;Ochlodes sylvanus;NA;0.316;Ochlodes sylvanus;0.996318754838625;

MN140754;Lepidoptera;Lycaena alciphron;Lycaena alciphron;1;Lycaena alciphron;0.999999813633071;  
 MN140755;Lepidoptera;Gonepteryx rhamni;NA;0.202;Gonepteryx rhamni;0.990544908845376;  
 MN140757;Lepidoptera;Maniola jurtina;NA;0.171;Maniola jurtina;0.963697912386445;  
 MN140758;Lepidoptera;Pyrgus serratulae;Pyrgus serratulae;1;Pyrgus serratulae;0.99999989567508;  
 MN140759;Lepidoptera;Ochlodes sylvanus;NA;0.316;Ochlodes sylvanus;0.996318754838625;  
 MN140761;Lepidoptera;Pyrgus andromedae;Pyrgus andromedae;0.001;Pyrgus  
 andromedae;0.985699239604726;  
 MN140763;Lepidoptera;Polyommatus icarus;NA;0.002;Polyommatus icarus;0.9989029998049;  
 MN140763;Lepidoptera;Polyommatus icarus;NA;0.002;Polyommatus icarus;0.9989029998049;  
 MN140764;Lepidoptera;Ochlodes sylvanus;NA;0.316;Ochlodes sylvanus;0.996318754838625;  
 MN140765;Lepidoptera;Lasimommata maera;Lasimommata maera;1;Lasimommata maera;0.999999176235688;  
 MN140766;Lepidoptera;Callophrys rubi;NA;0.019;Callophrys rubi;0.998201459637982;  
 MN140767;Lepidoptera;Lycaena dispar;Lycaena dispar;1;Lycaena dispar;0.99999990743959;  
 MN140768;Lepidoptera;Colias hyale;Colias hyale;0.015;Colias hyale;0.999997884296128;  
 MN140770;Lepidoptera;Melitaea didyma;Melitaea didyma;1;Melitaea didyma;0.999803304909779;  
 MN140771;Lepidoptera;Favonius quercus;NA;NA;Favonius quercus;0.73046069582187;  
 MN140772;Lepidoptera;Argynnis paphia;Argynnis paphia;1;Argynnis paphia;0.99999991389927;  
 MN140774;Lepidoptera;Vanessa atalanta;Vanessa atalanta;1;Vanessa atalanta;0.99999999297358;  
 MN140775;Lepidoptera;Boloria euphrosyne;Boloria euphrosyne;1;Boloria  
 euphrosyne;0.999999820119927;  
 MN140777;Lepidoptera;Carcharodus alceae;Carcharodus alceae;1;Carcharodus  
 alceae;0.99999998465938;  
 MN140778;Lepidoptera;Pyrgus armoricanus;Pyrgus armoricanus;1;Pyrgus  
 armoricanus;0.999989012351076;  
 MN140779;Lepidoptera;Erebia oeme;NA;0.161;Erebia oeme;0.99999999457856;  
 MN140780;Lepidoptera;Thymelicus lineola;Thymelicus lineola;1;Thymelicus  
 lineola;0.999993782911474;  
 MN140781;Lepidoptera;Polyommatus daphnis;Polyommatus daphnis;1;Polyommatus  
 daphnis;0.99977716269156;  
 MN140782;Lepidoptera;Gegenes pumilio;Gegenes pumilio;1;Gegenes pumilio;0.999986726679266;  
 MN140783;Lepidoptera;Coenonympha pamphilus;Coenonympha pamphilus;1;Coenonympha  
 pamphilus;0.999999999999574;  
 MN140784;Lepidoptera;Pyrgus malvoides;NA;0.176;Pyrgus malvoides;0.940490890379026;  
 MN140788;Lepidoptera;Maniola jurtina;NA;0.012;Maniola jurtina;0.91755716175482;  
 MN140789;Lepidoptera;Colias alfacariensis;Colias alfacariensis;1;Colias  
 alfacariensis;0.999986994131001;  
 MN140790;Lepidoptera;Thymelicus acteon;Thymelicus acteon;1;Thymelicus acteon;0.99999998964029;  
 MN140791;Lepidoptera;Limenitis camilla;NA;0.025;Limenitis camilla;0.999994294272475;  
 MN140794;Lepidoptera;Pieris napi;NA;0.011;Pieris napi;0.801985394724814;  
 MN140795;Lepidoptera;Pieris napi;NA;0.011;Pieris napi;0.801985394724814;  
 MN140796;Lepidoptera;Coenonympha pamphilus;Coenonympha pamphilus;1;Coenonympha  
 pamphilus;0.999999999999744;  
 MN140798;Lepidoptera;Polyommatus icarus;NA;0.001;Polyommatus icarus;0.981285528541973;  
 MN140798;Lepidoptera;Polyommatus icarus;NA;0.001;Polyommatus icarus;0.981285528541973;  
 MN140800;Lepidoptera;Coenonympha pamphilus;Coenonympha pamphilus;1;Coenonympha  
 pamphilus;0.999999999999744;  
 MN140801;Lepidoptera;Erebia montana;Erebia montana;1;Erebia montana;0.999047244700624;  
 MN140802;Lepidoptera;Nymphalis egea;Polygonia egea;1;Polygonia egea;0.999999878357791;  
 MN140803;Lepidoptera;Melitaea deione;Melitaea deione;1;Melitaea deione;0.999999545882719;  
 MN140804;Lepidoptera;Brenthis daphne;NA;0.102;Brenthis daphne;0.717134521611551;  
 MN140805;Lepidoptera;Aporia eumedon;Eumedonia eumedon;0.001;Eumedonia eumedon;0.998109622286715;  
 MN140806;Lepidoptera;Aporia crataegi;NA;NA;Aporia crataegi;0.999996781126733;  
 MN140807;Lepidoptera;Aricia cramera;Aricia cramera;1;Aricia cramera;0.999995452012538;  
 MN140808;Lepidoptera;Parnassius apollo;Parnassius apollo;1;Parnassius apollo;0.995259714099824;  
 MN140809;Lepidoptera;Cyaniris semiargus;NA;NA;Cyaniris semiargus;0.999051841766953;  
 MN140811;Lepidoptera;Araschnia levana;Araschnia levana;1;Araschnia levana;0.99999772187832;  
 MN140813;Lepidoptera;Polyommatus eros;NA;0.004;Polyommatus eros;0.972411810082555;  
 MN140814;Lepidoptera;Polyommatus icarus;NA;0.004;Polyommatus icarus;0.999481683747521;  
 MN140814;Lepidoptera;Polyommatus icarus;NA;0.004;Polyommatus icarus;0.999481683747521;  
 MN140815;Lepidoptera;Anthocharis cardamines;Anthocharis cardamines;1;Anthocharis  
 cardamines;0.99999990347561;  
 MN140817;Lepidoptera;Nymphalis c-album;NA;0.215;NA;0.999999192918557;  
 MN140819;Lepidoptera;Aglais urticae;Aglais urticae;0.001;Aglais urticae;0.994396335177485;  
 MN140820;Lepidoptera;Polyommatus daphnis;Polyommatus daphnis;1;Polyommatus  
 daphnis;0.999874472754722;  
 MN140821;Lepidoptera;Pieris napi;NA;0.011;Pieris napi;0.801985394724814;  
 MN140822;Lepidoptera;Maniola jurtina;NA;0.001;Maniola jurtina;0.939220105860875;  
 MN140823;Lepidoptera;Colias alfacariensis;Colias alfacariensis;0.001;Colias  
 alfacariensis;0.999926026317526;  
 MN140824;Lepidoptera;Lycaena phlaeas;Lycaena phlaeas;1;Lycaena phlaeas;0.999999996363186;  
 MN140825;Lepidoptera;Aricia cramera;Aricia cramera;1;Aricia cramera;0.999994067325963;  
 MN140826;Lepidoptera;Colias crocea;NA;0.059;NA;0.999999999999738;  
 MN140827;Lepidoptera;Pyrgus malvoides;NA;0.176;Pyrgus malvoides;0.940490890379026;  
 MN140828;Lepidoptera;Pieris napi;NA;0.011;Pieris napi;0.801985394724814;  
 MN140829;Lepidoptera;Pyrgus malvoides;Pyrgus malvoides;0.009;Pyrgus malvoides;0.912953074572214;  
 MN140830;Lepidoptera;Polyommatus amandus;Polyommatus amandus;0.006;Polyommatus  
 amandus;0.999981460994076;  
 MN140831;Lepidoptera;Aglais urticae;NA;0.002;Aglais urticae;0.987497593219019;

MN140832;Lepidoptera;Hipparchia hermione;NA;NA;NA;0.999999999999991;  
MN140833;Lepidoptera;Maniola jurtina;NA;NA;Maniola jurtina;0.977038297978319;  
MN140834;Lepidoptera;Agriades orbitulus;Agriades orbitulus;NA;Agriades  
orbitulus;0.999216256740517;  
MN140836;Lepidoptera;Plebejus idas;NA;0.007;NA;0.999546324331549;  
MN140837;Lepidoptera;Pieris napi;NA;0.011;Pieris napi;0.801985394724814;  
MN140838;Lepidoptera;Favonius quercus;NA;0.176;Favonius quercus;0.828947799604254;  
MN140840;Lepidoptera;Aricia agestis;NA;0.069;Aricia agestis;0.995918114091591;  
MN140841;Lepidoptera;Chazara briseis;Chazara briseis;1;Chazara briseis;0.999975731693442;  
MN140843;Lepidoptera;Lysandra coridon;Lysandra coridon;0.001;Lysandra coridon;0.928646244815605;  
MN140844;Lepidoptera;Plebejus idas;NA;0.007;NA;0.999546324331549;  
MN140845;Lepidoptera;Colias crocea;NA;0.059;NA;0.999999999999738;  
MN140846;Lepidoptera;Melitaea didyma;Melitaea didyma;1;Melitaea didyma;0.999376065333983;  
MN140847;Lepidoptera;Coenonympha gardetta;NA;0.316;NA;0.99999999999985;  
MN140848;Lepidoptera;Pieris napi;NA;0.011;Pieris napi;0.801985394724814;  
MN140849;Lepidoptera;Chazara briseis;Chazara briseis;1;Chazara briseis;0.999975731693442;  
MN140850;Lepidoptera;Celastrina argiolus;Celastrina argiolus;1;Celastrina  
argiolus;0.998625501352879;  
MN140851;Lepidoptera;Polyommatus icarus;NA;0.001;Polyommatus icarus;0.981285528541973;  
MN140851;Lepidoptera;Polyommatus icarus;NA;0.001;Polyommatus icarus;0.981285528541973;  
MN140852;Lepidoptera;Glaucopsyche alexis;Glaucopsyche alexis;0.001;Glaucopsyche  
alexis;0.94042380088325;  
MN140854;Lepidoptera;Coenonympha pamphilus;Coenonympha pamphilus;1;Coenonympha  
pamphilus;0.999999999999289;  
MN140855;Lepidoptera;Maniola jurtina;NA;0.001;Maniola jurtina;0.939220105860875;  
MN140857;Lepidoptera;Cupido minimus;NA;0.009;Cupido minimus;0.999791453712643;  
MN140859;Lepidoptera;Minois dryas;NA;0.025;Minois dryas;0.850746026247397;  
MN140860;Lepidoptera;Erynnis tages;Erynnis tages;1;Erynnis tages;0.999996973757536;  
MN140861;Lepidoptera;Boloria thore;Boloria thore;1;Boloria thore;0.99999998359726;  
MN140862;Lepidoptera;Lysandra coridon;NA;NA;NA;0.998017994491822;  
MN140864;Lepidoptera;Pyrgus malvoides;NA;0.052;Pyrgus malvoides;0.943208768333892;  
MN140865;Lepidoptera;Plebejus argus;NA;0.328;Plebejus argus;0.969789734199889;  
MN140866;Lepidoptera;Fabriciana adippe;NA;NA;Fabriciana adippe;0.788180479135482;  
MN140867;Lepidoptera;Nymphalis c-album;NA;0.215;NA;0.999999192918557;  
MN140868;Lepidoptera;Maniola jurtina;NA;0.038;NA;0.999999999999524;  
MN140870;Lepidoptera;Maniola jurtina;NA;0.171;Maniola jurtina;0.963697912386445;  
MN140871;Lepidoptera;Maniola jurtina;NA;0.171;Maniola jurtina;0.963697912386445;  
MN140873;Lepidoptera;Vanessa atalanta;Vanessa atalanta;1;Vanessa atalanta;0.999999999757762;  
MN140874;Lepidoptera;Maniola jurtina;NA;0.153;Maniola jurtina;0.908984189778786;  
MN140877;Lepidoptera;Vanessa atalanta;Vanessa atalanta;1;Vanessa atalanta;0.99999995828034;  
MN140881;Lepidoptera;Colias crocea;NA;0.059;NA;0.999999999999738;  
MN140882;Lepidoptera;Brintesia circe;Brintesia circe;NA;Brintesia circe;0.999999813082031;  
MN140883;Lepidoptera;Polyommatus humedasa;Polyommatus humedasa;1;Polyommatus  
humedasa;0.998764240535817;  
MN140885;Lepidoptera;Maniola jurtina;NA;NA;Maniola jurtina;0.951668238126128;  
MN140888;Lepidoptera;Nymphalis io;NA;0.491;Aglais io;0.930153237246992;  
MN140889;Lepidoptera;Lycaena virgaurea;NA;0.079;Lycaena virgaurea;0.99957744599144;  
MN140890;Lepidoptera;Vanessa cardui;Vanessa cardui;1;Vanessa cardui;0.999999459983318;  
MN140891;Lepidoptera;Maniola jurtina;NA;0.153;Maniola jurtina;0.908984189778786;  
MN140892;Lepidoptera;Lycaena phlaeas;Lycaena phlaeas;1;Lycaena phlaeas;0.99999998467302;  
MN140893;Lepidoptera;Ochlodes sylvanus;NA;0.316;Ochlodes sylvanus;0.996318754838625;  
MN140895;Lepidoptera;Nymphalis antiopa;NA;0.23;Nymphalis antiopa;0.99999994198096;  
MN140896;Lepidoptera;Carcharodus alceae;Carcharodus alceae;0.001;Carcharodus  
alceae;0.999999970193983;  
MN140897;Lepidoptera;Polyommatus icarus;NA;0.025;Polyommatus icarus;0.997831523019962;  
MN140897;Lepidoptera;Polyommatus icarus;NA;0.025;Polyommatus icarus;0.997831523019962;  
MN140898;Lepidoptera;Hipparchia leighebi;Hipparchia leighebi;1;Hipparchia  
leighebi;0.921532082781005;  
MN140900;Lepidoptera;Aricia eumedon;Eumedonia eumedon;0.002;Eumedonia eumedon;0.997793024117892;  
MN140901;Lepidoptera;Pyrgus armoricanus;Pyrgus armoricanus;1;Pyrgus  
armoricanus;0.999998471802089;  
MN140903;Lepidoptera;Euphydryas aurinia;NA;0.31;Euphydryas aurinia;0.993387708761386;  
MN140906;Lepidoptera;Pyrgus cacaliae;Pyrgus cacaliae;0.001;Pyrgus cacaliae;0.986004413030866;  
MN140907;Lepidoptera;Nymphalis egea;Polygonia egea;1;Polygonia egea;0.999999758078475;  
MN140910;Lepidoptera;Chazara briseis;Chazara briseis;1;Chazara briseis;0.999980393060755;  
MN140911;Lepidoptera;Hipparchia neapolitana;NA;0.001;Hipparchia semele;0.802446092830354;  
MN140914;Lepidoptera;Maniola jurtina;NA;0.012;Maniola jurtina;0.91755716175482;  
MN140916;Lepidoptera;Erebia euryale;NA;NA;Erebia euryale;0.930379489603908;  
MN140917;Lepidoptera;Maniola jurtina;NA;0.001;Maniola jurtina;0.939220105860875;  
MN140921;Lepidoptera;Coenonympha pamphilus;Coenonympha pamphilus;1;Coenonympha  
pamphilus;0.99999999999946;  
MN140922;Lepidoptera;Pyrgus onopordi;Pyrgus onopordi;1;Pyrgus onopordi;0.99999711229755;  
MN140923;Lepidoptera;Polyommatus celina;NA;0.072;Polyommatus celina;0.99999999809518;  
MN140928;Lepidoptera;Maniola jurtina;NA;NA;Maniola jurtina;0.975846749104596;  
MN140929;Lepidoptera;Ochlodes sylvanus;NA;0.316;Ochlodes sylvanus;0.996318754838625;  
MN140931;Lepidoptera;Polyommatus escheri;Polyommatus escheri;1;Polyommatus  
escheri;0.9999999037189;

MN140932;Lepidoptera;Fabriciana adippe;Fabriciana adippe;0.007;Fabriciana adippe;0.876018745965171;  
MN140933;Lepidoptera;Lycaena phlaeas;Lycaena phlaeas;1;Lycaena phlaeas;0.999999996363186;  
MN140934;Lepidoptera;Boloria selene;NA;0.121;Boloria selene;0.999999736425372;  
MN140939;Lepidoptera;Satyrium spini;Satyrium spini;1;Satyrium spini;0.99999833352032;  
MN140940;Lepidoptera;Pieris napi;NA;0.011;Pieris napi;0.801985394724814;  
MN140941;Lepidoptera;Polyommatus amandus;Polyommatus amandus;0.003;Polyommatus amandus;0.999980071833264;  
MN140942;Lepidoptera;Plebejus argus;NA;0.036;Plebejus argus;0.988160277018267;  
MN140943;Lepidoptera;Erebia euryale;NA;NA;Erebia euryale;0.919518760623792;  
MN140944;Lepidoptera;Melitaea parthenoides;Melitaea parthenoides;1;Melitaea parthenoides;0.99999993530452;  
MN140946;Lepidoptera;Thymelicus sylvestris;NA;0.324;Thymelicus sylvestris;0.999940778442454;  
MN140947;Lepidoptera;Polyommatus icarus;NA;0.13;Polyommatus icarus;0.979762695748748;  
MN140947;Lepidoptera;Polyommatus icarus;NA;0.13;Polyommatus icarus;0.979762695748748;  
MN140948;Lepidoptera;Maniola jurtina;NA;NA;Maniola jurtina;0.962395157646957;  
MN140949;Lepidoptera;Lycaena thersamon;Lycaena thersamon;0.001;Lycaena thersamon;0.952360353045614;  
MN140951;Lepidoptera;Nymphalis c-album;NA;0.215;NA;0.999999192918557;  
MN140955;Lepidoptera;Polyommatus amandus;Polyommatus amandus;0.001;Polyommatus amandus;0.999983821158591;  
MN140956;Lepidoptera;Erynnis tages;Erynnis tages;1;Erynnis tages;0.999999366511675;  
MN140957;Lepidoptera;Apatura ilia;NA;0.165;Apatura ilia;0.956796812031481;  
MN140958;Lepidoptera;Brenthis daphne;Brenthis daphne;0.001;Brenthis daphne;0.996209297077896;  
MN140960;Lepidoptera;Aricia artaxerxes;NA;0.394;Aricia artaxerxes;0.999502890976379;  
MN140961;Lepidoptera;Plebejus argus;NA;0.328;Plebejus argus;0.969789734199889;  
MN140962;Lepidoptera;Melitaea diamina;Melitaea diamina;0.001;Melitaea diamina;0.99999991551789;  
MN140963;Lepidoptera;Maniola cecilia;Pyronia cecilia;1;Pyronia cecilia;0.99999999999829;  
MN140965;Lepidoptera;Vanessa atalanta;Vanessa atalanta;1;Vanessa atalanta;0.99999999757762;  
MN140966;Lepidoptera;Satyrium acaciae;Satyrium acaciae;1;Satyrium acaciae;0.999999951077798;  
MN140968;Lepidoptera;Vanessa atalanta;Vanessa atalanta;1;Vanessa atalanta;0.99999998473413;  
MN140969;Lepidoptera;Lycaena phlaeas;Lycaena phlaeas;1;Lycaena phlaeas;0.999999996363186;  
MN140970;Lepidoptera;Argynnis paphia;Argynnis paphia;1;Argynnis paphia;0.99999991389927;  
MN140973;Lepidoptera;Colias alfacariensis;Colias alfacariensis;0.001;Colias alfacariensis;0.999926026317526;  
MN140975;Lepidoptera;Scolitantides orion;Scolitantides orion;1;Scolitantides orion;0.999999962763383;  
MN140976;Lepidoptera;Callophrys rubi;NA;0.019;Callophrys rubi;0.998201459637982;  
MN140978;Lepidoptera;Thymelicus lineola;Thymelicus lineola;1;Thymelicus lineola;0.999991569816764;  
MN140979;Lepidoptera;Callophrys rubi;NA;0.019;Callophrys rubi;0.998201459637982;  
MN140982;Lepidoptera;Hipparchia semele;NA;NA;Hipparchia semele;0.748345401572611;  
MN140984;Lepidoptera;Oeneis glacialis;NA;NA;Oeneis glacialis;0.894225823747824;  
MN140985;Lepidoptera;Heteropterus morpheus;NA;NA;Heteropterus morpheus;0.999999999999943;  
MN140987;Lepidoptera;Fabriciana niobe;NA;0.001;Fabriciana niobe;0.989214650993052;  
MN140988;Lepidoptera;Limenitis camilla;Limenitis camilla;0.009;Limenitis camilla;0.9999828626808;  
MN140989;Lepidoptera;Favonius quercus;Favonius quercus;1;Favonius quercus;0.99866473455334;  
MN140990;Lepidoptera;Maniola jurtina;NA;0.171;Maniola jurtina;0.963697912386445;  
MN140991;Lepidoptera;Erebia euryale;NA;NA;Erebia euryale;0.93493911427573;  
MN140994;Lepidoptera;Thymelicus sylvestris;Thymelicus sylvestris;1;Thymelicus sylvestris;0.999999985935205;  
MN140995;Lepidoptera;Erebia pandrose;Erebia pandrose;0.013;Erebia pandrose;0.977710593365884;  
MN140996;Lepidoptera;Erebia cassioides;NA;NA;NA;0.999999999999875;  
MN140997;Lepidoptera;Maniola jurtina;NA;0.038;NA;0.99999999999524;  
MN140998;Lepidoptera;Cupido argiades;NA;0.499;NA;0.9999999999984682;  
MN140999;Lepidoptera;Maniola jurtina;NA;NA;NA;0.99999999991;  
MN141000;Lepidoptera;Euphydryas Cynthia;Euphydryas Cynthia;1;Euphydryas Cynthia;0.99999999705039;  
MN141001;Lepidoptera;Satyrus actaea;Satyrus actaea;0.004;Satyrus actaea;0.992141961048358;  
MN141002;Lepidoptera;Polyommatus icarus;NA;0.001;Polyommatus icarus;0.998038752085667;  
MN141002;Lepidoptera;Polyommatus icarus;NA;0.001;Polyommatus icarus;0.998038752085667;  
MN141003;Lepidoptera;Pyrgus armoricus;Pyrgus armoricus;1;Pyrgus armoricus;0.999914079595002;  
MN141004;Lepidoptera;Polyommatus icarus;NA;0.001;Polyommatus icarus;0.981285528541973;  
MN141004;Lepidoptera;Polyommatus icarus;NA;0.001;Polyommatus icarus;0.981285528541973;  
MN141006;Lepidoptera;Cyaniris semiargus;Cyaniris semiargus;NA;Cyaniris semiargus;0.999795734354061;  
MN141007;Lepidoptera;Colias crocea;NA;NA;NA;0.999999999998439;  
MN141008;Lepidoptera;Polyommatus celina;NA;0.032;Polyommatus celina;0.999999999963052;  
MN141009;Lepidoptera;Lasiommata maera;Lasiommata maera;1;Lasiommata maera;0.999999231272409;  
MN141011;Lepidoptera;Anthocharis euphenoides;NA;0.172;Anthocharis euphenoides;0.943741664916385;  
MN141012;Lepidoptera;Polyommatus damon;Polyommatus damon;1;Polyommatus damon;0.999999740261648;  
MN141015;Lepidoptera;Erebia euryale;NA;NA;Erebia euryale;0.919518760623792;  
MN141016;Lepidoptera;Hipparchia leighebi;Hipparchia leighebi;1;Hipparchia leighebi;0.921532082781005;  
MN141017;Lepidoptera;Lampides boeticus;Lampides boeticus;1;Lampides boeticus;0.99999999545906;  
MN141018;Lepidoptera;Aricia agestis;NA;0.069;Aricia agestis;0.995918114091591;

MN141019;Lepidoptera;Brintesia circe;Brintesia circe;1;Brintesia circe;0.99999951254154;  
MN141020;Lepidoptera;Coenonympha pamphilus;Coenonympha pamphilus;1;Coenonympha  
pamphilus;0.999999999999744;  
MN141021;Lepidoptera;Maniola jurtina;NA;0.001;Maniola jurtina;0.939220105860875;  
MN141022;Lepidoptera;Thymelicus lineola;Thymelicus lineola;1;Thymelicus  
lineola;0.999993861717935;  
MN141023;Lepidoptera;Polyommatus icarus;NA;0.13;Polyommatus icarus;0.979762695748748;  
MN141024;Lepidoptera;Coenonympha arcania;NA;0.004;NA;0.999999999999983;  
MN141025;Lepidoptera;Maniola jurtina;NA;NA;NA;0.9999999988982;  
MN141026;Lepidoptera;Argynnis aglaja;NA;0.001;NA;0.999999999999586;  
MN141027;Lepidoptera;Aglais urticae;Aglais urticae;0.001;Aglais urticae;0.990690600684087;  
MN141028;Lepidoptera;Coenonympha oedippus;Coenonympha oedippus;1;Coenonympha  
oedippus;0.99999999999801;  
MN141029;Lepidoptera;Lasiommata maera;Lasiommata maera;1;Lasiommata maera;0.999996707718045;  
MN141030;Lepidoptera;Satyrium spini;Satyrium spini;1;Satyrium spini;0.999999874306646;  
MN141031;Lepidoptera;Maniola jurtina;NA;0.012;Maniola jurtina;0.91755716175482;  
MN141032;Lepidoptera;Colias palaeno;NA;NA;NA;0.999999998051059;  
MN141033;Lepidoptera;Maniola jurtina;NA;0.001;Maniola jurtina;0.939220105860875;  
MN141036;Lepidoptera;Pieris napi;NA;0.028;Pieris napi;0.888205720664699;  
MN141037;Lepidoptera;Aricia cramera;Aricia cramera;1;Aricia cramera;0.999993731037033;  
MN141038;Lepidoptera;Erebia scipio;Erebia scipio;1;Erebia scipio;0.99999996086046;  
MN141040;Lepidoptera;Aporia crataegi;NA;NA;Aporia crataegi;0.999996781126733;  
MN141041;Lepidoptera;Maniola jurtina;NA;0.012;Maniola jurtina;0.91755716175482;  
MN141042;Lepidoptera;Maniola jurtina;NA;NA;Maniola jurtina;0.973823960006955;  
MN141043;Lepidoptera;Argynnis aglaja;NA;NA;NA;0.99999999998051;  
MN141044;Lepidoptera;Ochlodes sylvanus;NA;0.316;Ochlodes sylvanus;0.996318754838625;  
MN141045;Lepidoptera;Hipparchia semele;NA;NA;Hipparchia semele;0.748345401572611;  
MN141046;Lepidoptera;Polyommatus dorylas;Polyommatus dorylas;0.005;Polyommatus  
dorylas;0.987518562410738;  
MN141047;Lepidoptera;Lycaena phlaeas;Lycaena phlaeas;1;Lycaena phlaeas;0.999999994834951;  
MN141048;Lepidoptera;Araschnia levana;Araschnia levana;1;Araschnia levana;0.999999772187832;  
MN141050;Lepidoptera;Coenonympha arcania;NA;0.136;NA;0.999999999999949;  
MN141051;Lepidoptera;Polyommatus celina;NA;0.067;Polyommatus celina;0.99999999867015;  
MN141053;Lepidoptera;Carcharodus alceae;Carcharodus alceae;1;Carcharodus  
alceae;0.999999998465938;  
MN141055;Lepidoptera;Coenonympha arcania;NA;0.001;NA;0.999999999999954;  
MN141057;Lepidoptera;Anthocharis euphenoides;NA;0.066;Anthocharis euphenoides;0.963162702900425;  
MN141059;Lepidoptera;Colias alfacariensis;Colias alfacariensis;1;Colias  
alfacariensis;0.999971626784761;  
MN141060;Lepidoptera;Thymelicus sylvestris;Thymelicus sylvestris;1;Thymelicus  
sylvestris;0.999999981568351;  
MN141061;Lepidoptera;Cyaniris semiargus;NA;NA;Cyaniris semiargus;0.999051841766953;  
MN141063;Lepidoptera;Argynnis paphia;Argynnis paphia;1;Argynnis paphia;0.99999991389927;  
MN141064;Lepidoptera;Aglais urticae;Aglais urticae;0.003;Aglais urticae;0.992916858265829;  
MN141065;Lepidoptera;Aricia agestis;NA;0.253;Aricia agestis;0.996350017387504;  
MN141066;Lepidoptera;Hipparchia hermione;NA;NA;NA;0.999999999999941;  
MN141069;Lepidoptera;Aricia artaxerxes;Plebejus argus;1;Aricia artaxerxes;0.999743187199922;  
MN141070;Lepidoptera;Hipparchia fagi;NA;NA;Hipparchia fagi;0.958291584360022;  
MN141071;Lepidoptera;Melitaea didyma;Melitaea didyma;NA;Melitaea didyma;0.988520743221049;  
MN141076;Lepidoptera;Plebejus argus;Plebejus argus;0.014;Plebejus argus;0.985827082916227;  
MN141077;Lepidoptera;Ochlodes sylvanus;NA;0.316;Ochlodes sylvanus;0.996318754838625;  
MN141078;Lepidoptera;Colias hyale;Colias hyale;0.015;Colias hyale;0.999997884296128;  
MN141079;Lepidoptera;Melitaea diamina;Melitaea diamina;1;Melitaea diamina;0.999999955078466;  
MN141080;Lepidoptera;Gonepteryx rhamni;NA;0.474;Gonepteryx rhamni;0.982076396127858;  
MN141081;Lepidoptera;Erebia euryale;NA;NA;Erebia euryale;0.919518760623792;  
MN141082;Lepidoptera;Polyommatus eros;NA;0.002;Polyommatus eros;0.97355586919553;  
MN141083;Lepidoptera;Lysandra coridon;NA;NA;NA;0.998070184737648;  
MN141085;Lepidoptera;Gonepteryx cleopatra;Gonepteryx cleopatra;0.998;Gonepteryx  
cleopatra;0.999118636582266;  
MN141087;Lepidoptera;Ochlodes sylvanus;NA;0.316;Ochlodes sylvanus;0.996318754838625;  
MN141089;Lepidoptera;Melitaea diamina;NA;0.149;Melitaea diamina;0.99999996592464;  
MN141090;Lepidoptera;Cercyonis lupina;Hyponephele lupina;1;Hyponephele lupina;0.999999780587781;  
MN141091;Lepidoptera;Coenonympha pamphilus;Coenonympha pamphilus;1;Coenonympha  
pamphilus;0.999999999999261;  
MN141092;Lepidoptera;Polyommatus icarus;NA;0.003;Polyommatus icarus;0.986125651677522;  
MN141093;Lepidoptera;Maniola jurtina;NA;0.012;Maniola jurtina;0.91755716175482;  
MN141094;Lepidoptera;Hipparchia fagi;NA;NA;Hipparchia fagi;0.866849620838858;  
MN141096;Lepidoptera;Favonius quercus;NA;0.176;Favonius quercus;0.828947799604254;  
MN141099;Lepidoptera;Plebejus argus;NA;0.328;Plebejus argus;0.969789734199889;  
MN141100;Lepidoptera;Polyommatus daphnis;Polyommatus daphnis;1;Polyommatus  
daphnis;0.999921867144376;  
MN141101;Lepidoptera;Polyommatus daphnis;Polyommatus daphnis;1;Polyommatus  
daphnis;0.999956965089886;  
MN141104;Lepidoptera;Aricia agestis;NA;0.253;Aricia agestis;0.996350017387504;  
MN141105;Lepidoptera;Pieris napi;NA;0.011;Pieris napi;0.801985394724814;  
MN141106;Lepidoptera;Maniola jurtina;NA;0.001;Maniola jurtina;0.934808344053278;  
MN141107;Lepidoptera;Pyrgus foulquieri;NA;NA;Pyrgus alveus;0.827119616974978;  
MN141108;Lepidoptera;Hamearis lucina;NA;NA;Hamearis lucina;0.999999999972005;

MN141110;Lepidoptera;Melitaea varia;Melitaea varia;1;Melitaea varia;0.999995561735475;  
MN141111;Lepidoptera;Cupido alcetas;NA;0.218;Cupido alcetas;0.833501983138177;  
MN141112;Lepidoptera;Maniola jurtina;NA;0.012;Maniola jurtina;0.91755716175482;  
MN141113;Lepidoptera;Euphydryas aurinia;NA;0.003;Euphydryas aurinia;0.997335703140863;  
MN141114;Lepidoptera;Coenonympha pamphilus;Coenonympha pamphilus;1;Coenonympha  
pamphilus;0.99999999999744;  
MN141115;Lepidoptera;Maniola jurtina;NA;0.012;Maniola jurtina;0.91755716175482;  
MN141117;Lepidoptera;Argynnis aglaja;NA;NA;NA;0.999999999998051;  
MN141118;Lepidoptera;Argynnis paphia;Argynnis paphia;1;Argynnis paphia;0.999999991389927;  
MN141119;Lepidoptera;Erebia montana;Erebia montana;0.999;Erebia montana;0.999197718943054;  
MN141120;Lepidoptera;Celastrina argiolus;Celastrina argiolus;1;Celastrina  
argiolus;0.999527385150531;  
MN141121;Lepidoptera;Thymelicus lineola;Thymelicus lineola;1;Thymelicus  
lineola;0.999997253294615;  
MN141123;Lepidoptera;Maniola jurtina;NA;0.012;Maniola jurtina;0.91755716175482;  
MN141124;Lepidoptera;Ochlodes sylvanus;NA;0.316;Ochlodes sylvanus;0.996318754838625;  
MN141125;Lepidoptera;Maniola jurtina;NA;0.053;Maniola jurtina;0.923638385392458;  
MN141129;Lepidoptera;Agriades optilete;Agriades optilete;1;Agriades optilete;0.999999991215986;  
MN141130;Lepidoptera;Polyommatus icarus;NA;0.001;Polyommatus icarus;0.981285528541973;  
MN141131;Lepidoptera;Maniola jurtina;NA;NA;NA;0.99999999985062;  
MN141133;Lepidoptera;Coenonympha gardetta;NA;0.049;NA;0.99999999999993;  
MN141134;Lepidoptera;Pyrgus malvoides;NA;0.076;Pyrgus malvoides;0.887854315566122;  
MN141135;Lepidoptera;Aricia eumedon;Eumedonia eumedon;1;Eumedonia eumedon;0.998131593926134;  
MN141136;Lepidoptera;Satyrium spini;Satyrium spini;1;Satyrium spini;0.999996566715492;  
MN141137;Lepidoptera;Cyaniris semiargus;NA;NA;Cyaniris semiargus;0.999403437373583;  
MN141138;Lepidoptera;Plebejus idas;NA;0.007;NA;0.999546324331549;  
MN141139;Lepidoptera;Argynnis aglaja;NA;NA;Speyeria aglaja;0.872991147917853;  
MN141140;Lepidoptera;Lasiommata maera;Lasiommata maera;1;Lasiommata maera;0.99999647458974;  
MN141141;Lepidoptera;Aricia cramera;Aricia cramera;1;Aricia cramera;0.999993731037033;  
MN141142;Lepidoptera;Plebejus argyrognomon;NA;0.001;NA;0.994620093546684;  
MN141143;Lepidoptera;Boloria dia;Boloria dia;1;Boloria dia;0.99999999980503;  
MN141145;Lepidoptera;Pyrgus malvoides;NA;0.176;Pyrgus malvoides;0.940490890379026;  
MN141149;Lepidoptera;Maniola nurag;Maniola nurag;1;Maniola nurag;0.980240365753515;  
MN141150;Lepidoptera;Polyommatus icarus;NA;0.002;Polyommatus icarus;0.99863334013761;  
MN141152;Lepidoptera;Aphantopus hyperantus;Aphantopus hyperantus;0.003;Aphantopus  
hyperantus;0.999999455871523;  
MN141153;Lepidoptera;Pieris napi;NA;NA;Pieris napi;0.93839557695923;  
MN141154;Lepidoptera;Aricia cramera;Aricia cramera;1;Aricia cramera;0.999993731037033;  
MN141155;Lepidoptera;Pieris napi;NA;0.011;Pieris napi;0.801985394724814;  
MN141156;Lepidoptera;Nymphalis c-album;NA;0.215;NA;0.999999192918557;  
MN141157;Lepidoptera;Melitaea trivia;Melitaea trivia;1;Melitaea trivia;0.9999999997047;  
MN141159;Lepidoptera;Lycaena phlaeas;Lycaena phlaeas;1;Lycaena phlaeas;0.99999999524411;  
MN141161;Lepidoptera;Pyrgus malvoides;NA;0.052;Pyrgus malvoides;0.943208768333892;  
MN141164;Lepidoptera;Satyrium spini;Satyrium spini;1;Satyrium spini;0.999999584403498;  
MN141165;Lepidoptera;Colias phicomone;NA;0.001;Colias phicomone;0.985598879697681;  
MN141167;Lepidoptera;Thymelicus lineola;Thymelicus lineola;1;Thymelicus  
lineola;0.999990992106503;  
MN141168;Lepidoptera;Pyrgus malvoides;NA;0.169;Pyrgus malvoides;0.932394695119002;  
MN141169;Lepidoptera;Thymelicus sylvestris;Thymelicus sylvestris;1;Thymelicus  
sylvestris;0.999999985935205;  
MN141170;Lepidoptera;Lampides boeticus;Lampides boeticus;1;Lampides boeticus;0.999999999545906;  
MN141171;Lepidoptera;Melitaea didyma;Melitaea didyma;1;Melitaea didyma;0.995729075061249;  
MN141172;Lepidoptera;Erebia oeme;NA;0.139;Erebia oeme;0.999999999595161;  
MN141173;Lepidoptera;Parnassius apollo;Parnassius apollo;1;Parnassius apollo;0.992704703916692;  
MN141174;Lepidoptera;Melitaea trivia;Melitaea trivia;1;Melitaea trivia;0.99999999964132;  
MN141176;Lepidoptera;Hipparchia hermione;NA;NA;NA;0.99999999999991;  
MN141178;Lepidoptera;Thymelicus acteon;Thymelicus acteon;1;Thymelicus acteon;0.9999999752248;  
MN141180;Lepidoptera;Brenthis daphne;Brenthis daphne;0.002;Brenthis daphne;0.981758807090479;  
MN141181;Lepidoptera;Erynnis tages;Erynnis tages;1;Erynnis tages;0.99999281987018;  
MN141184;Lepidoptera;Boloria euphrosyne;Boloria euphrosyne;1;Boloria  
euphrosyne;0.999998276608842;  
MN141186;Lepidoptera;Pyrgus carthami;Pyrgus carthami;1;Pyrgus carthami;0.999995592447668;  
MN141187;Lepidoptera;Coenonympha gardetta;NA;0.32;Coenonympha arcania;0.715629089660113;  
MN141188;Lepidoptera;Maniola jurtina;NA;NA;Maniola jurtina;0.949988160645333;  
MN141189;Lepidoptera;Aricia cramera;Aricia cramera;1;Aricia cramera;0.999993771528195;  
MN141191;Lepidoptera;Lycaena virgaureae;NA;0.186;Lycaena virgaureae;0.999491227342155;  
MN141193;Lepidoptera;Coenonympha pamphilus;Coenonympha pamphilus;1;Coenonympha  
pamphilus;0.999999999999744;  
MN141194;Lepidoptera;Melitaea didyma;Melitaea didyma;1;Melitaea didyma;0.999429129005203;  
MN141196;Lepidoptera;Melitaea cinxia;Melitaea cinxia;1;Melitaea cinxia;0.999999999999574;  
MN141197;Lepidoptera;Polyommatus eros;NA;0.005;Polyommatus eros;0.95275169203039;  
MN141200;Lepidoptera;Brenthis daphne;NA;0.102;Brenthis daphne;0.717134521611551;  
MN141203;Lepidoptera;Lasiommata maera;Lasiommata maera;1;Lasiommata maera;0.999996552555305;  
MN141204;Lepidoptera;Favonius quercus;NA;NA;Favonius quercus;0.715695980142394;  
MN141207;Lepidoptera;Polyommatus dolus;Polyommatus dolus;0.002;Polyommatus  
dolus;0.974976778379616;  
MN141211;Lepidoptera;Melitaea didyma;Melitaea didyma;1;Melitaea didyma;0.999959378564843;  
MN141212;Lepidoptera;Erebia pronoe;Erebia pronoe;1;Erebia pronoe;0.999567958198288;



MN141214;Lepidoptera;Aricia agestis;NA;0.069;Aricia agestis;0.995918114091591;  
MN141215;Lepidoptera;Hipparchia fidia;Hipparchia fidia;1;Hipparchia fidia;1;  
MN141216;Lepidoptera;Carcharodus alceae;Carcharodus alceae;1;Carcharodus  
alceae;0.99999998465938;  
MN141217;Lepidoptera;Glaucopsyche alexis;NA;NA;Glaucopsyche alexis;0.979381169624069;  
MN141218;Lepidoptera;Ochlodes sylvanus;NA;0.316;Ochlodes sylvanus;0.996318754838625;  
MN141219;Lepidoptera;Lycaena virgaureae;NA;0.186;Lycaena virgaureae;0.999491227342155;  
MN141220;Lepidoptera;Cupido argiades;NA;0.499;NA;0.99999999984682;  
MN141221;Lepidoptera;Cupido osiris;Cupido osiris;1;Cupido osiris;0.999999791352473;  
MN141222;Lepidoptera;Thymelicus acteon;Thymelicus acteon;1;Thymelicus acteon;0.999999997365563;  
MN141223;Lepidoptera;Pyrgus onopordi;Pyrgus onopordi;1;Pyrgus onopordi;0.999997111229755;  
MN141224;Lepidoptera;Lasiommata megera;Lasiommata megera;1;Lasiommata megera;0.999437048233275;  
MN141225;Lepidoptera;Argynnis aglaja;NA;NA;Speyeria aglaja;0.872991147917853;  
MN141226;Lepidoptera;Scolitantides orion;Scolitantides orion;1;Scolitantides  
orion;0.999999882574;  
MN141227;Lepidoptera;Melitaea cinxia;Melitaea cinxia;1;Melitaea cinxia;0.99999999999829;  
MN141228;Lepidoptera;Coenonympha dorus;Coenonympha dorus;1;Coenonympha dorus;0.99999999023714;  
MN141229;Lepidoptera;Lycaena virgaureae;NA;0.186;Lycaena virgaureae;0.999491227342155;  
MN141231;Lepidoptera;Cupido alcetas;NA;0.218;Cupido alcetas;0.833501983138177;  
MN141232;Lepidoptera;Pieris napi;NA;0.011;Pieris napi;0.801985394724814;  
MN141235;Lepidoptera;Polyommatus icarus;NA;0.006;Polyommatus icarus;0.997965308245128;  
MN141236;Lepidoptera;Erebia medusa;NA;0.002;Erebia medusa;0.991052367627986;  
MN141238;Lepidoptera;Melitaea didyma;Melitaea didyma;1;Melitaea didyma;0.992538595287689;  
MN141239;Lepidoptera;Polyommatus celina;Polyommatus celina;0.009;Polyommatus  
celina;0.99999999949694;  
MN141241;Lepidoptera;Erebia pandrose;Erebia pandrose;0.003;Erebia pandrose;0.993608645577247;  
MN141242;Lepidoptera;Coenonympha dorus;Coenonympha dorus;1;Coenonympha dorus;0.99999999943213;  
MN141246;Lepidoptera;Cupido argiades;NA;0.499;NA;0.99999999984682;  
MN141247;Lepidoptera;Erebia oeme;NA;0.092;Erebia oeme;0.99999999500744;  
MN141248;Lepidoptera;Polyommatus icarus;NA;0.007;Polyommatus icarus;0.999081737461227;  
MN141249;Lepidoptera;Fabriciana adippe;Fabriciana adippe;0.012;Fabriciana  
adippe;0.987124560355947;  
MN141250;Lepidoptera;Hipparchia fidia;Hipparchia fidia;1;Hipparchia fidia;1;  
MN141251;Lepidoptera;Thymelicus lineola;Thymelicus lineola;1;Thymelicus  
lineola;0.999997716763366;  
MN141252;Lepidoptera;Thymelicus lineola;Thymelicus lineola;1;Thymelicus  
lineola;0.999975182615948;  
MN141253;Lepidoptera;Vanessa cardui;Vanessa cardui;1;Vanessa cardui;0.999999803450484;  
MN141255;Lepidoptera;Brenthis daphne;Brenthis daphne;1;Brenthis daphne;0.998776006728298;  
MN141256;Lepidoptera;Lasiommata megera;Lasiommata megera;1;Lasiommata megera;0.999951812067954;  
MN141257;Lepidoptera;Nymphalis c-album;NA;0.215;NA;0.999999192918557;  
MN141258;Lepidoptera;Lasiommata megera;Lasiommata megera;1;Lasiommata megera;0.999928528239676;  
MN141259;Lepidoptera;Gegenes pumilio;Gegenes pumilio;1;Gegenes pumilio;0.999986726679266;  
MN141260;Lepidoptera;Lysandra coridon;NA;NA;NA;0.999076788188261;  
MN141262;Lepidoptera;Cupido minimus;NA;0.006;Cupido minimus;0.999768371759258;  
MN141263;Lepidoptera;Carcharodus baeticus;Carcharodus baeticus;1;Carcharodus  
baeticus;0.999983899664537;  
MN141264;Lepidoptera;Lycaena virgaureae;NA;0.186;Lycaena virgaureae;0.999491227342155;  
MN141265;Lepidoptera;Erebia pluto;Erebia pluto;1;Erebia pluto;0.99999696335028;  
MN141266;Lepidoptera;Lysandra coridon;Lysandra coridon;NA;Lysandra coridon;0.935848180514696;  
MN141268;Lepidoptera;Erynnis tages;Erynnis tages;1;Erynnis tages;0.999999281987018;  
MN141269;Lepidoptera;Fabriciana niobe;NA;0.005;Fabriciana niobe;0.992125835358755;  
MN141270;Lepidoptera;Colias crocea;NA;NA;NA;0.99999999999703;  
MN141271;Lepidoptera;Glaucopsyche alexis;NA;NA;Glaucopsyche alexis;0.979381169624069;  
MN141272;Lepidoptera;Lasiommata megera;Lasiommata megera;1;Lasiommata megera;0.999379144055441;  
MN141273;Lepidoptera;Boloria titania;Boloria titania;0.001;Boloria titania;0.99983358374111;  
MN141274;Lepidoptera;Aricia agestis;NA;0.101;Aricia agestis;0.998279476999417;  
MN141275;Lepidoptera;Erebia mnestra;Erebia mnestra;0.001;Erebia mnestra;0.999937560187875;  
MN141277;Lepidoptera;Ochlodes sylvanus;NA;0.316;Ochlodes sylvanus;0.996318754838625;  
MN141279;Lepidoptera;Apatura ilia;NA;0.165;Apatura ilia;0.956796812031481;  
MN141280;Lepidoptera;Thymelicus acteon;Thymelicus acteon;1;Thymelicus acteon;0.99999998066187;  
MN141281;Lepidoptera;Vanessa cardui;Vanessa cardui;1;Vanessa cardui;0.999999415287647;  
MN141282;Lepidoptera;Hipparchia fidia;Hipparchia fidia;1;Hipparchia fidia;1;  
MN141284;Lepidoptera;Maniola jurtina;NA;0.001;Maniola jurtina;0.939220105860875;  
MN141287;Lepidoptera;Nymphalis c-album;NA;0.08;NA;0.999996025433302;  
MN141288;Lepidoptera;Polyommatus icarus;NA;0.166;Polyommatus icarus;0.749935576218847;  
MN141289;Lepidoptera;Anthocharis cardamines;Anthocharis cardamines;1;Anthocharis  
cardamines;0.999999984875757;  
MN141290;Lepidoptera;Colias crocea;NA;0.059;NA;0.99999999999738;  
MN141291;Lepidoptera;Coenonympha pamphilus;Coenonympha pamphilus;1;Coenonympha  
pamphilus;0.99999999999744;  
MN141292;Lepidoptera;Brenthis ino;NA;0.035;Brenthis ino;0.801568196042921;  
MN141293;Lepidoptera;Vanessa cardui;Vanessa cardui;1;Vanessa cardui;0.99999662580109;  
MN141294;Lepidoptera;Thymelicus lineola;Thymelicus lineola;1;Thymelicus  
lineola;0.99995927238524;  
MN141295;Lepidoptera;Erynnis tages;Erynnis tages;1;Erynnis tages;0.99997852943696;  
MN141297;Lepidoptera;Polyommatus escheri;Polyommatus escheri;1;Polyommatus  
escheri;0.999999997279474;

MN141301;Lepidoptera;Maniola cecilia;Pyronia cecilia;1;Pyronia cecilia;1;  
MN141302;Lepidoptera;Polyommatus daphnis;Polyommatus daphnis;1;Polyommatus  
daphnis;0.999874472754722;  
MN141303;Lepidoptera;Fabriciana niobe;Fabriciana niobe;0.001;Fabriciana niobe;0.93186202957215;  
MN141305;Lepidoptera;Aricia cramera;Aricia cramera;1;Aricia cramera;0.999993731037033;  
MN141306;Lepidoptera;Ochlodes sylvanus;NA;0.316;Ochlodes sylvanus;0.996318754838625;  
MN141307;Lepidoptera;Colias crocea;NA;0.059;NA;0.999999999999738;  
MN141309;Lepidoptera;Aricia cramera;Aricia cramera;1;Aricia cramera;0.999993731037033;  
MN141310;Lepidoptera;Colias alfacariensis;Colias alfacariensis;0.001;Colias  
alfacariensis;0.999926026317526;  
MN141311;Lepidoptera;Lasiommata megera;Lasiommata megera;1;Lasiommata megera;0.999928274880381;  
MN141312;Lepidoptera;Maniola jurtina;NA;0.012;Maniola jurtina;0.91755716175482;  
MN141314;Lepidoptera;Lycaena alciphron;Lycaena alciphron;1;Lycaena alciphron;0.99999925232376;  
MN141315;Lepidoptera;Anthocharis cardamines;Anthocharis cardamines;1;Anthocharis  
cardamines;0.99999557325721;  
MN141316;Lepidoptera;Lasiommata megera;Lasiommata megera;1;Lasiommata megera;0.999928528239676;  
MN141318;Lepidoptera;Lycaena phlaeas;Lycaena phlaeas;1;Lycaena phlaeas;0.99999996363186;  
MN141319;Lepidoptera;Brintesia circe;Brintesia circe;1;Brintesia circe;0.99999826991328;  
MN141320;Lepidoptera;Lasiommata paramegaera;Lasiommata paramegaera;0.999;Lasiommata  
paramegaera;0.995283446287531;  
MN141323;Lepidoptera;Erebia styx;NA;NA;Erebia styx;0.946491813354197;  
MN141326;Lepidoptera;Aporia crataegi;NA;NA;Aporia crataegi;0.999996781126733;  
MN141327;Lepidoptera;Coenonympha pamphilus;Coenonympha pamphilus;1;Coenonympha  
pamphilus;0.999999999999801;  
MN141328;Lepidoptera;Maniola jurtina;NA;0.001;Maniola jurtina;0.939220105860875;  
MN141329;Lepidoptera;Gegenes nostrodamus;Gegenes nostrodamus;1;Gegenes  
nostrodamus;0.99999996883645;  
MN141330;Lepidoptera;Melitaea cinxia;Melitaea cinxia;1;Melitaea cinxia;0.99999999999747;  
MN141331;Lepidoptera;Arethusana arethusa;NA;0.062;Arethusana arethusa;0.999962489703143;  
MN141333;Lepidoptera;Erebia euryale;NA;NA;Erebia euryale;0.921817494498387;  
MN141335;Lepidoptera;Cyaniris semiargus;NA;NA;Cyaniris semiargus;0.999174215987991;  
MN141336;Lepidoptera;Erebia pronoe;Erebia pronoe;1;Erebia pronoe;0.999567958198288;  
MN141337;Lepidoptera;Aglais urticae;NA;NA;Aglais urticae;0.983552218799952;  
MN141338;Lepidoptera;Lasiommata maera;Lasiommata maera;1;Lasiommata maera;0.99999510792253;  
MN141339;Lepidoptera;Melitaea didyma;Melitaea didyma;1;Melitaea didyma;0.996114466964567;  
MN141340;Lepidoptera;Aglais urticae;Aglais urticae;0.006;Aglais urticae;0.994059189651409;  
MN141341;Lepidoptera;Glaucopsyche melanops;Glaucopsyche melanops;1;Glaucopsyche  
melanops;0.999953769170809;  
MN141343;Lepidoptera;Pieris napi;NA;0.011;Pieris napi;0.801985394724814;  
MN141345;Lepidoptera;Erebia euryale;NA;NA;Erebia euryale;0.928140003403935;  
MN141346;Lepidoptera;Celastrina argiolus;Celastrina argiolus;1;Celastrina  
argiolus;0.999527385150531;  
MN141347;Lepidoptera;Plebejus idas;NA;0.002;NA;0.999661061707603;  
MN141349;Lepidoptera;Erebia pluto;Erebia pluto;1;Erebia pluto;0.99999696335028;  
MN141350;Lepidoptera;Aphantopus hyperantus;Aphantopus hyperantus;0.006;Aphantopus  
hyperantus;0.999998615504572;  
MN141351;Lepidoptera;Anthocharis damone;Anthocharis damone;1;Anthocharis  
damone;0.99999992252839;  
MN141352;Lepidoptera;Melitaea didyma;Melitaea didyma;1;Melitaea didyma;0.999870115406424;  
MN141353;Lepidoptera;Brintesia circe;Brintesia circe;1;Brintesia circe;0.99999567592263;  
MN141355;Lepidoptera;Nymphalis c-album;NA;0.215;NA;0.999999192918557;  
MN141358;Lepidoptera;Lycaena tityrus;Lycaena tityrus;1;Lycaena tityrus;0.999995729087172;  
MN141359;Lepidoptera;Melanargia galathea;Melanargia galathea;NA;Melanargia  
galathea;0.935799586887365;  
MN141361;Lepidoptera;Pieris napi;NA;0.011;Pieris napi;0.801985394724814;  
MN141362;Lepidoptera;Erynnis tages;Erynnis tages;1;Erynnis tages;0.999997762421119;  
MN141363;Lepidoptera;Cupido minimus;NA;0.004;Cupido minimus;0.999876030978574;  
MN141364;Lepidoptera;Brenthis daphne;Brenthis daphne;0.001;Brenthis daphne;0.997781825264304;  
MN141365;Lepidoptera;Nymphalis io;NA;0.491;Aglais io;0.930153237246992;  
MN141366;Lepidoptera;Nymphalis c-album;NA;0.215;NA;0.999999192918557;  
MN141368;Lepidoptera;Maniola jurtina;NA;NA;NA;0.9999999985062;  
MN141369;Lepidoptera;Cupido minimus;NA;0.009;Cupido minimus;0.999791453712643;  
MN141370;Lepidoptera;Gonepteryx rhamni;NA;0.192;Gonepteryx rhamni;0.991002175992451;  
MN141372;Lepidoptera;Heteropterus morpheus;NA;NA;Heteropterus morpheus;0.999999999999943;  
MN141373;Lepidoptera;Pyrgus serratulae;Pyrgus serratulae;1;Pyrgus serratulae;0.9999989567508;  
MN141374;Lepidoptera;Arethusana arethusa;NA;0.153;Arethusana arethusa;0.999652039046744;  
MN141375;Lepidoptera;Satyrium spini;Satyrium spini;1;Satyrium spini;0.99999856409385;  
MN141376;Lepidoptera;Vanessa cardui;Vanessa cardui;1;Vanessa cardui;0.999996792914969;  
MN141377;Lepidoptera;Lasiommata maera;Lasiommata maera;1;Lasiommata maera;0.99999857497297;  
MN141378;Lepidoptera;Favonius quercus;Favonius quercus;0.001;Favonius quercus;0.998653971664806;  
MN141380;Lepidoptera;Araschnia levana;Araschnia levana;1;Araschnia levana;0.999999772187832;  
MN141381;Lepidoptera;Erebia eriphyle;Erebia eriphyle;1;Erebia eriphyle;0.999999844642259;  
MN141382;Lepidoptera;Polyommatus escheri;Polyommatus escheri;1;Polyommatus  
escheri;0.999999986762475;  
MN141383;Lepidoptera;Cupido argiades;NA;0.499;NA;0.99999999984682;  
MN141386;Lepidoptera;Parnassius apollo;Parnassius apollo;0.001;Parnassius  
apollo;0.988746066053368;  
MN141388;Lepidoptera;Pyrgus sidae;Pyrgus sidae;1;Pyrgus sidae;0.999994778595454;

MN141390;Lepidoptera;Vanessa cardui;Vanessa cardui;1;Vanessa cardui;0.99999980896293;  
MN141391;Lepidoptera;Polyommatus eros;NA;0.001;Polyommatus eros;0.974879223675754;  
MN141392;Lepidoptera;Argynnis paphia;Argynnis paphia;1;Argynnis paphia;0.99999995594547;  
MN141393;Lepidoptera;Polyommatus dorylas;Polyommatus dorylas;0.005;Polyommatus  
dorylas;0.987518562410738;  
MN141394;Lepidoptera;Lasiommata megera;Lasiommata megera;0.995;Lasiommata  
megera;0.999279716854958;  
MN141395;Lepidoptera;Lasiommata maera;Lasiommata maera;1;Lasiommata maera;0.999991701827935;  
MN141396;Lepidoptera;Nymphalis c-album;NA;0.215;NA;0.999999192918557;  
MN141398;Lepidoptera;Aricia artaxerxes;NA;0.139;Aricia artaxerxes;0.999594219786776;  
MN141399;Lepidoptera;Plebejus argus;Plebejus argus;0.004;Plebejus argus;0.989715396991954;  
MN141400;Lepidoptera;Erebia nivalis;NA;NA;NA;0.999999999999947;  
MN141402;Lepidoptera;Agriades optilete;Agriades optilete;1;Agriades optilete;0.999999981865244;  
MN141403;Lepidoptera;Ochlodes sylvanus;NA;0.316;Ochlodes sylvanus;0.996318754838625;  
MN141404;Lepidoptera;Lysandra hispana;NA;NA;NA;0.999411492526574;  
MN141406;Lepidoptera;Melitaea cinxia;Melitaea cinxia;1;Melitaea cinxia;0.999999999999659;  
MN141408;Lepidoptera;Coenonympha gardetta;NA;0.004;NA;0.999999999999983;  
MN141410;Lepidoptera;Polyommatus icarus;Polyommatus icarus;0.001;Polyommatus  
icarus;0.999514219992789;  
MN141411;Lepidoptera;Maniola jurtina;NA;0.012;Maniola jurtina;0.91755716175482;  
MN141417;Lepidoptera;Melitaea didyma;Melitaea didyma;0.021;Melitaea didyma;0.9742722334097;  
MN141418;Lepidoptera;Euphydryas aurinia;NA;0.003;Euphydryas aurinia;0.991537324299735;  
MN141419;Lepidoptera;Maniola jurtina;NA;0.038;NA;0.999999999999524;  
MN141420;Lepidoptera;Lasiommata maera;Lasiommata maera;1;Lasiommata maera;0.99999510792253;  
MN141422;Lepidoptera;Anthocharis euphenoides;NA;0.057;Anthocharis euphenoides;0.971022337943165;  
MN141423;Lepidoptera;Polyommatus daphnis;Polyommatus daphnis;1;Polyommatus  
daphnis;0.99978194753064;  
MN141425;Lepidoptera;Aporia crataegi;NA;0.008;Aporia crataegi;0.999994505037455;  
MN141426;Lepidoptera;Polyommatus icarus;NA;0.003;Polyommatus icarus;0.998348220031726;  
MN141428;Lepidoptera;Aricia artaxerxes;NA;0.001;Aricia artaxerxes;0.998546425606378;  
MN141430;Lepidoptera;Coenonympha oedippus;Coenonympha oedippus;1;Coenonympha  
oedippus;0.999999999999972;  
MN141432;Lepidoptera;Brintesia circe;Brintesia circe;1;Brintesia circe;0.99999951254154;  
MN141433;Lepidoptera;Nymphalis io;NA;0.491;Aglais io;0.930153237246992;  
MN141434;Lepidoptera;Cyaniris semiargus;NA;NA;Cyaniris semiargus;0.999394218884171;  
MN141435;Lepidoptera;Euphydryas aurinia;Euphydryas aurinia;0.016;Euphydryas  
aurinia;0.997751503369639;  
MN141436;Lepidoptera;Favonius quercus;NA;NA;Favonius quercus;0.73046069582187;  
MN141437;Lepidoptera;Celastrina argiolus;Celastrina argiolus;1;Celastrina  
argiolus;0.999527385150531;  
MN141438;Lepidoptera;Carcharodus baeticus;Carcharodus baeticus;1;Carcharodus  
baeticus;0.999983899664537;  
MN141440;Lepidoptera;Plebejus idas;NA;0.007;NA;0.999546324331549;  
MN141441;Lepidoptera;Euphydryas aurinia;NA;0.31;Euphydryas aurinia;0.993387708761386;  
MN141442;Lepidoptera;Euphydryas aurinia;NA;0.001;Euphydryas aurinia;0.995576749826865;  
MN141444;Lepidoptera;Callophrys rubi;NA;0.02;Callophrys rubi;0.999082687464383;  
MN141445;Lepidoptera;Pieris napi;NA;0.011;Pieris napi;0.801985394724814;  
MN141447;Lepidoptera;Maniola jurtina;NA;0.012;Maniola jurtina;0.91755716175482;  
MN141448;Lepidoptera;Brenthis daphne;Brenthis daphne;0.006;Brenthis daphne;0.984559944066479;  
MN141449;Lepidoptera;Heteropterus morpheus;Heteropterus morpheus;1;Heteropterus  
morpheus;0.999999999999915;  
MN141450;Lepidoptera;Erebia eriphyle;Erebia eriphyle;1;Erebia eriphyle;0.999999983979336;  
MN141451;Lepidoptera;Maniola jurtina;NA;0.001;Maniola jurtina;0.762537481133735;  
MN141452;Lepidoptera;Polyommatus icarus;NA;0.001;Polyommatus icarus;0.981285528541973;  
MN141454;Lepidoptera;Callophrys rubi;NA;0.003;Callophrys rubi;0.997328639918919;  
MN141457;Lepidoptera;Cyaniris semiargus;NA;NA;Cyaniris semiargus;0.999143514250088;  
MN141458;Lepidoptera;Melitaea cinxia;Melitaea cinxia;1;Melitaea cinxia;0.999999999999403;  
MN141459;Lepidoptera;Pyrgus malvoides;NA;0.052;Pyrgus malvoides;0.943208768333892;  
MN141460;Lepidoptera;Melitaea trivia;Melitaea trivia;1;Melitaea trivia;0.999999999960949;  
MN141461;Lepidoptera;Pieris napi;NA;0.011;Pieris napi;0.801985394724814;  
MN141462;Lepidoptera;Melitaea cinxia;Melitaea cinxia;1;Melitaea cinxia;0.999999999999403;  
MN141463;Lepidoptera;Lycaena dispar;Lycaena dispar;1;Lycaena dispar;0.999999990743959;  
MN141464;Lepidoptera;Nymphalis io;NA;0.491;Aglais io;0.930153237246992;  
MN141465;Lepidoptera;Polyommatus thersites;Polyommatus thersites;0.002;Polyommatus  
thersites;0.99999957714892;  
MN141466;Lepidoptera;Celastrina argiolus;Celastrina argiolus;1;Celastrina  
argiolus;0.999527385150531;  
MN141467;Lepidoptera;Coenonympha arcania;NA;0.002;NA;0.999999999999972;  
MN141468;Lepidoptera;Euphydryas aurinia;NA;0.106;Euphydryas aurinia;0.993939072040577;  
MN141469;Lepidoptera;Callophrys rubi;NA;0.003;Callophrys rubi;0.997328639918919;  
MN141471;Lepidoptera;Lycaena phlaeas;Lycaena phlaeas;1;Lycaena phlaeas;0.999999998505558;  
MN141473;Lepidoptera;Lycaena phlaeas;Lycaena phlaeas;1;Lycaena phlaeas;0.999999996363186;  
MN141474;Lepidoptera;Pyrgus armoricanus;Pyrgus armoricanus;1;Pyrgus  
armoricanus;0.999997353848817;  
MN141476;Lepidoptera;Satyrium spini;Satyrium spini;1;Satyrium spini;0.999999856409385;  
MN141477;Lepidoptera;Aricia agestis;NA;0.253;Aricia agestis;0.996350017387504;  
MN141478;Lepidoptera;Thymelicus acteon;Thymelicus acteon;1;Thymelicus acteon;0.99999999752248;  
MN141479;Lepidoptera;Papilio machaon;Papilio machaon;NA;Papilio machaon;0.998489747694706;

MN141481;Lepidoptera;Melitaea diamina;NA;0.175;Melitaea diamina;0.999999965126648;  
MN141482;Lepidoptera;Coenonympha pamphilus;Coenonympha pamphilus;1;Coenonympha  
pamphilus;0.999999999999744;  
MN141483;Lepidoptera;Melitaea didyma;Melitaea didyma;0.008;Melitaea didyma;0.989890661413771;  
MN141484;Lepidoptera;Boloria selene;NA;0.237;Boloria selene;0.999999370529649;  
MN141488;Lepidoptera;Pyrgus malvoides;NA;0.176;Pyrgus malvoides;0.940490890379026;  
MN141489;Lepidoptera;Ochlodes sylvanus;NA;0.121;Ochlodes sylvanus;0.997242099793337;  
MN141490;Lepidoptera;Anthocharis cardamines;Anthocharis cardamines;1;Anthocharis  
cardamines;0.999999940675226;  
MN141491;Lepidoptera;Oeneis glacialis;Oeneis glacialis;0.003;Oeneis glacialis;0.981039562032588;  
MN141493;Lepidoptera;Colias crocea;NA;NA;NA;0.999999999999698;  
MN141494;Lepidoptera;Lampides boeticus;Lampides boeticus;1;Lampides boeticus;0.99999999545906;  
MN141495;Lepidoptera;Thecla betulae;Thecla betulae;1;Thecla betulae;0.99999999972886;  
MN141496;Lepidoptera;Maniola jurtina;NA;0.001;Maniola jurtina;0.939220105860875;  
MN141497;Lepidoptera;Lasiommata maera;Lasiommata maera;1;Lasiommata maera;0.99999302200543;  
MN141498;Lepidoptera;Hipparchia aristaeus;Hipparchia aristaeus;1;Hipparchia  
aristaeus;0.99999991978029;  
MN141500;Lepidoptera;Erebia melampus;Erebia melampus;0.004;Erebia melampus;0.983689501667101;  
MN141501;Lepidoptera;Erebia euryale;NA;NA;NA;0.904567192995332;  
MN141502;Lepidoptera;Carcharodus alceae;Carcharodus alceae;1;Carcharodus  
alceae;0.99999998465938;  
MN141503;Lepidoptera;Pyrgus malvoides;NA;0.176;Pyrgus malvoides;0.940490890379026;  
MN141504;Lepidoptera;Cyaniris semiargus;NA;NA;Cyaniris semiargus;0.999051841766953;  
MN141505;Lepidoptera;Lycaena tityrus;Lycaena tityrus;1;Lycaena tityrus;0.99999828238034;  
MN141506;Lepidoptera;Pyrgus carlinae;NA;NA;Pyrgus carlinae;0.854199018204849;  
MN141507;Lepidoptera;Erynnis tages;Erynnis tages;1;Erynnis tages;0.999999281987018;  
MN141508;Lepidoptera;Colias crocea;NA;0.059;NA;0.99999999999738;  
MN141509;Lepidoptera;Plebejus argyrognomon;NA;0.001;NA;0.994620093546684;  
MN141510;Lepidoptera;Maniola cecilia;Pyronia cecilia;1;Pyronia cecilia;1;  
MN141511;Lepidoptera;Maniola jurtina;NA;0.001;Maniola jurtina;0.939220105860875;  
MN141512;Lepidoptera;Lysandra coridon;NA;NA;NA;0.999273654546554;  
MN141515;Lepidoptera;Lycaena virgaureae;NA;0.087;Lycaena virgaureae;0.999684241774462;  
MN141516;Lepidoptera;Arethusana arethusa;Arethusana arethusa;0.03;Arethusana  
arethusa;0.999936812003872;  
MN141517;Lepidoptera;Erebia euryale;NA;NA;Erebia euryale;0.919518760623792;  
MN141518;Lepidoptera;Parnassius apollo;Parnassius apollo;1;Parnassius apollo;0.992704703916692;  
MN141519;Lepidoptera;Thecla betulae;Thecla betulae;1;Thecla betulae;0.99999999972886;  
MN141520;Lepidoptera;Melitaea britomartis;NA;NA;Melitaea britomartis;0.979063627307907;  
MN141521;Lepidoptera;Satyrium pruni;NA;0.076;Satyrium pruni;0.990322364021655;  
MN141522;Lepidoptera;Aricia cramera;Aricia cramera;1;Aricia cramera;0.999993731037033;  
MN141523;Lepidoptera;Polyommatus icarus;Polyommatus icarus;0.001;Polyommatus  
icarus;0.999851522482238;  
MN141524;Lepidoptera;Maniola jurtina;NA;0.001;Maniola jurtina;0.939220105860875;  
MN141525;Lepidoptera;Gonepteryx cleopatra;Gonepteryx cleopatra;0.998;Gonepteryx  
cleopatra;0.999118636582266;  
MN141526;Lepidoptera;Melitaea cinxia;Melitaea cinxia;1;Melitaea cinxia;0.999999999999801;  
MN141527;Lepidoptera;Euphydryas intermedia;NA;0.051;NA;0.999999999993892;  
MN141528;Lepidoptera;Lycaena phlaeas;Lycaena phlaeas;1;Lycaena phlaeas;0.999999996363186;  
MN141531;Lepidoptera;Lampides boeticus;Lampides boeticus;1;Lampides boeticus;0.99999999545906;  
MN141532;Lepidoptera;Thymelicus acteon;Thymelicus acteon;1;Thymelicus acteon;0.999999962833841;  
MN141535;Lepidoptera;Coenonympha oedippus;Coenonympha oedippus;1;Coenonympha  
oedippus;0.999999999999432;  
MN141536;Lepidoptera;Boloria euphrosyne;Boloria euphrosyne;1;Boloria  
euphrosyne;0.99998824779231;  
MN141537;Lepidoptera;Vanessa atalanta;Vanessa atalanta;1;Vanessa atalanta;0.99999999757762;  
MN141538;Lepidoptera;Thymelicus lineola;Thymelicus lineola;1;Thymelicus  
lineola;0.999995927238524;  
MN141541;Lepidoptera;Aricia cramera;Aricia cramera;1;Aricia cramera;0.999993731037033;  
MN141544;Lepidoptera;Hipparchia semele;NA;0.001;Hipparchia semele;0.867663229455045;  
MN141545;Lepidoptera;Ochlodes sylvanus;NA;0.316;Ochlodes sylvanus;0.996318754838625;  
MN141546;Lepidoptera;Vanessa atalanta;Vanessa atalanta;1;Vanessa atalanta;0.99999999885944;  
MN141548;Lepidoptera;Vanessa cardui;Vanessa cardui;1;Vanessa cardui;0.999999459983318;  
MN141549;Lepidoptera;Glaucopsyche melanops;Glaucopsyche melanops;1;Glaucopsyche  
melanops;0.999952924254607;  
MN141551;Lepidoptera;Melitaea diamina;NA;0.051;Melitaea diamina;0.99999999618322;  
MN141553;Lepidoptera;Lampides boeticus;Lampides boeticus;1;Lampides boeticus;0.99999999876789;  
MN141554;Lepidoptera;Nymphalis io;NA;0.18;Aglais io;0.962699592413277;  
MN141556;Lepidoptera;Gonepteryx cleopatra;Gonepteryx cleopatra;0.998;Gonepteryx  
cleopatra;0.999118636582266;  
MN141557;Lepidoptera;Polyommatus icarus;NA;0.003;Polyommatus icarus;0.998348220031726;  
MN141558;Lepidoptera;Euphydryas aurinia;NA;0.31;Euphydryas aurinia;0.993387708761386;  
MN141559;Lepidoptera;Melitaea nevadensis;NA;0.006;Melitaea celadussa;0.848898461529793;  
MN141560;Lepidoptera;Argynnis aglaja;NA;NA;Speyeria aglaja;0.872991147917853;  
MN141561;Lepidoptera;Coenonympha arcania;NA;0.172;Coenonympha arcania;0.963036309473038;  
MN141562;Lepidoptera;Callophrys rubi;NA;0.001;Callophrys rubi;0.99870518510598;  
MN141565;Lepidoptera;Polyommatus celina;Polyommatus celina;0.009;Polyommatus  
celina;0.99999999739714;  
MN141566;Lepidoptera;Aricia agestis;NA;0.067;Aricia agestis;0.999509743227786;

MN141567;Lepidoptera;Brintesia circe;Brintesia circe;1;Brintesia circe;0.99999951254154;  
MN141569;Lepidoptera;Satyrium ilicis;Satyrium ilicis;1;Satyrium ilicis;0.999999987901305;  
MN141571;Lepidoptera;Celastrina argiolus;Celastrina argiolus;1;Celastrina  
argiolus;0.999527385150531;  
MN141572;Lepidoptera;Erynnis tages;Erynnis tages;1;Erynnis tages;0.999999281987018;  
MN141573;Lepidoptera;Lampides boeticus;Lampides boeticus;1;Lampides boeticus;0.99999999545906;  
MN141574;Lepidoptera;Nymphalis c-album;NA;0.215;NA;0.999999192918557;  
MN141575;Lepidoptera;Nymphalis io;NA;0.491;Aglais io;0.930153237246992;  
MN141576;Lepidoptera;Aglais urticae;NA;0.002;Aglais urticae;0.987497593219019;  
MN141577;Lepidoptera;Fabriciana niobe;Fabriciana niobe;0.001;Fabriciana niobe;0.93186202957215;  
MN141578;Lepidoptera;Anthocharis cardamines;Anthocharis cardamines;1;Anthocharis  
cardamines;0.99999997953563;  
MN141581;Lepidoptera;Polyommatus thersites;Polyommatus thersites;0.999;Polyommatus  
thersites;0.99999985539095;  
MN141582;Lepidoptera;Callophrys rubi;NA;0.019;Callophrys rubi;0.998201459637982;  
MN141585;Lepidoptera;Coenonympha arcania;NA;0.004;NA;0.99999999999983;  
MN141586;Lepidoptera;Agriades optilete;Agriades optilete;1;Agriades optilete;0.99999990705788;  
MN141587;Lepidoptera;Satyrium w-album;NA;0.056;Satyrium w-album;0.989378230996316;  
MN141589;Lepidoptera;Vanessa atalanta;Vanessa atalanta;1;Vanessa atalanta;0.99999999757762;  
MN141590;Lepidoptera;Maniola jurtina;NA;0.012;Maniola jurtina;0.91755716175482;  
MN141591;Lepidoptera;Polyommatus dorylas;Polyommatus dorylas;0.008;Polyommatus  
dorylas;0.991281865899703;  
MN141592;Lepidoptera;Boloria euphrosyne;Boloria euphrosyne;1;Boloria  
euphrosyne;0.99999665665472;  
MN141593;Lepidoptera;Pyrgus cacaliae;Pyrgus cacaliae;0.001;Pyrgus cacaliae;0.986004413030866;  
MN141595;Lepidoptera;Argynnis aglaja;NA;NA;NA;0.999999999998776;  
MN141596;Lepidoptera;Euphydryas aurinia;NA;0.048;Euphydryas aurinia;0.996368864467059;  
MN141597;Lepidoptera;Lasiommata paramegaera;Lasiommata paramegaera;0.999;Lasiommata  
paramegaera;0.995283446287531;  
MN141598;Lepidoptera;Brintesia circe;Brintesia circe;1;Brintesia circe;0.999999847528;  
MN141599;Lepidoptera;Pyrgus serratulae;Pyrgus serratulae;1;Pyrgus serratulae;0.99999989567508;  
MN141600;Lepidoptera;Argynnis paphia;Argynnis paphia;1;Argynnis paphia;0.99999991389927;  
MN141601;Lepidoptera;Polyommatus thersites;Polyommatus thersites;0.001;Polyommatus  
thersites;0.999999937179697;  
MN141602;Lepidoptera;Erynnis tages;Erynnis tages;1;Erynnis tages;0.999999281987018;  
MN141603;Lepidoptera;Polyommatus icarus;Polyommatus icarus;0.001;Polyommatus  
icarus;0.999851522482238;  
MN141606;Lepidoptera;Aricia agestis;NA;0.246;Aricia agestis;0.989888047553269;  
MN141607;Lepidoptera;Aricia eumedon;Eumedonia eumedon;0.002;Eumedonia eumedon;0.997595421160923;  
MN141608;Lepidoptera;Nymphalis c-album;NA;0.215;NA;0.999999192918557;  
MN141609;Lepidoptera;Anthocharis cardamines;Anthocharis cardamines;1;Anthocharis  
cardamines;0.999999984875757;  
MN141610;Lepidoptera;Scolitantides orion;Scolitantides orion;1;Scolitantides  
orion;0.999999953787012;  
MN141612;Lepidoptera;Erebia euryale;NA;NA;Erebia euryale;0.919518760623792;  
MN141613;Lepidoptera;Ochlodes sylvanus;NA;0.045;Ochlodes sylvanus;0.99811370758105;  
MN141616;Lepidoptera;Polyommatus icarus;Polyommatus icarus;0.001;Polyommatus  
icarus;0.999851522482238;  
MN141617;Lepidoptera;Polyommatus escheri;Polyommatus escheri;1;Polyommatus  
escheri;0.99999973942977;  
MN141622;Lepidoptera;Boloria euphrosyne;Boloria euphrosyne;1;Boloria  
euphrosyne;0.999998514406196;  
MN141623;Lepidoptera;Polyommatus icarus;NA;0.001;Polyommatus icarus;0.981285528541973;  
MN141624;Lepidoptera;Satyrus ferula;Satyrus ferula;0.001;Satyrus ferula;0.973028384941015;  
MN141625;Lepidoptera;Maniola jurtina;NA;NA;Maniola jurtina;0.951668238126128;  
MN141626;Lepidoptera;Satyrus ferula;Satyrus ferula;0.001;Satyrus ferula;0.992107254386621;  
MN141627;Lepidoptera;Helleia helle;Lycaena helle;1;Lycaena helle;0.99999967866899;  
MN141628;Lepidoptera;Argynnis aglaja;NA;NA;NA;0.99999999998051;  
MN141629;Lepidoptera;Pyrgus carthami;Pyrgus carthami;1;Pyrgus carthami;0.999999568765909;  
MN141631;Lepidoptera;Thymelicus lineola;Thymelicus lineola;1;Thymelicus  
lineola;0.999995927238524;  
MN141632;Lepidoptera;Colias alfacariensis;Colias alfacariensis;0.001;Colias  
alfacariensis;0.999857790810452;  
MN141633;Lepidoptera;Aporia crataegi;NA;NA;Aporia crataegi;0.999996781126733;  
MN141634;Lepidoptera;Plebejus idas;NA;0.004;NA;0.996290075222426;  
MN141635;Lepidoptera;Maniola jurtina;NA;0.012;Maniola jurtina;0.91755716175482;  
MN141636;Lepidoptera;Thymelicus sylvestris;Thymelicus sylvestris;1;Thymelicus  
sylvestris;0.99999985935205;  
MN141638;Lepidoptera;Gonepteryx rhamni;NA;0.192;Gonepteryx rhamni;0.991002175992451;  
MN141639;Lepidoptera;Pyrgus malvoides;NA;0.176;Pyrgus malvoides;0.940490890379026;  
MN141640;Lepidoptera;Lasiommata maera;Lasiommata maera;0.001;Lasiommata maera;0.999996124904759;  
MN141641;Lepidoptera;Gonepteryx rhamni;Gonepteryx rhamni;0.003;Gonepteryx  
rhamni;0.999626866342769;  
MN141643;Lepidoptera;Anthocharis cardamines;Anthocharis cardamines;1;Anthocharis  
cardamines;0.99999969439756;  
MN141644;Lepidoptera;Pyrgus armoricanus;Pyrgus armoricanus;1;Pyrgus  
armoricanus;0.999997353848817;  
MN141645;Lepidoptera;Euphydryas aurinia;NA;0.31;Euphydryas aurinia;0.993387708761386;

MN141646;Lepidoptera;Colias crocea;NA;0.059;NA;0.999999999999738;  
MN141647;Lepidoptera;Vanessa cardui;Vanessa cardui;1;Vanessa cardui;0.999999803450484;  
MN141648;Lepidoptera;Erebia cassioides;NA;NA;NA;0.99999999999977;  
MN141649;Lepidoptera;Erebia cassioides;NA;NA;NA;0.999999999999885;  
MN141650;Lepidoptera;Colias alfacariensis;Colias alfacariensis;0.001;Colias  
alfacariensis;0.999966522684745;  
MN141651;Lepidoptera;Aricia artaxerxes;NA;0.154;Aricia artaxerxes;0.999137234708027;  
MN141652;Lepidoptera;Cyaniris semiargus;Cyaniris semiargus;NA;Cyaniris  
semiargus;0.999795734354061;  
MN141654;Lepidoptera;Lampides boeticus;Lampides boeticus;1;Lampides boeticus;0.999999999791584;  
MN141655;Lepidoptera;Chazara briseis;Chazara briseis;0.001;Chazara briseis;0.999989797071389;  
MN141657;Lepidoptera;Glaucopsyche melanops;Glaucopsyche melanops;1;Glaucopsyche  
melanops;0.999952924254607;  
MN141660;Lepidoptera;Thymelicus acteon;Thymelicus acteon;1;Thymelicus acteon;0.999999997454836;  
MN141661;Lepidoptera;Pyrgus malvoides;NA;0.176;Pyrgus malvoides;0.940490890379026;  
MN141663;Lepidoptera;Melitaea cinxia;Melitaea cinxia;1;Melitaea cinxia;0.999999999999716;  
MN141664;Lepidoptera;Vanessa atalanta;Vanessa atalanta;1;Vanessa atalanta;0.99999999757762;  
MN141666;Lepidoptera;Ochlodes sylvanus;NA;0.316;Ochlodes sylvanus;0.996318754838625;  
MN141668;Lepidoptera;Aglaia urticae;NA;0.002;Aglaia urticae;0.987497593219019;  
MN141669;Lepidoptera;Carcharodus alceae;Carcharodus alceae;1;Carcharodus  
alceae;0.999999998465938;  
MN141670;Lepidoptera;Maniola nurag;Maniola nurag;1;Maniola nurag;0.94592398344326;  
MN141671;Lepidoptera;Hamearis lucina;NA;NA;Hamearis lucina;0.99999999984141;  
MN141672;Lepidoptera;Colias crocea;NA;0.059;NA;0.999999999999738;  
MN141673;Lepidoptera;Polyommatus icarus;Polyommatus icarus;0.001;Polyommatus  
icarus;0.999856587459756;  
MN141674;Lepidoptera;Lampides boeticus;Lampides boeticus;1;Lampides boeticus;0.99999999545906;  
MN141677;Lepidoptera;Fabriciana elisa;Fabriciana elisa;1;Fabriciana elisa;0.998224933898912;  
MN141679;Lepidoptera;Ochlodes sylvanus;NA;0.316;Ochlodes sylvanus;0.996318754838625;  
MN141680;Lepidoptera;Pyrgus andromedae;Pyrgus andromedae;0.001;Pyrgus  
andromedae;0.997448239493065;  
MN141682;Lepidoptera;Boloria titania;Boloria titania;1;Boloria titania;0.999945035738056;  
MN141683;Lepidoptera;Boloria euphrosyne;Boloria euphrosyne;1;Boloria  
euphrosyne;0.999998621448425;  
MN141685;Lepidoptera;Erebia montana;Erebia montana;1;Erebia montana;0.999708414922343;  
MN141686;Lepidoptera;Maniola jurtina;NA;0.012;Maniola jurtina;0.91755716175482;  
MN141687;Lepidoptera;Coenonympha corinna;Coenonympha corinna;1;Coenonympha  
corinna;0.99999999974449;  
MN141688;Lepidoptera;Cyaniris semiargus;Cyaniris semiargus;NA;Cyaniris  
semiargus;0.999795734354061;  
MN141689;Lepidoptera;Lycaena tityrus;Lycaena tityrus;1;Lycaena tityrus;0.999998928238034;  
MN141690;Lepidoptera;Coenonympha gardetta;NA;0.027;NA;0.99999999999914;  
MN141691;Lepidoptera;Aricia cramera;Aricia cramera;1;Aricia cramera;0.999969295454852;  
MN141695;Lepidoptera;Erebia scipio;Erebia scipio;1;Erebia scipio;0.99999995588723;  
MN141698;Lepidoptera;Brintesia circe;Brintesia circe;1;Brintesia circe;0.99999951254154;  
MN141699;Lepidoptera;Thymelicus lineola;Thymelicus lineola;1;Thymelicus  
lineola;0.999990992106503;  
MN141700;Lepidoptera;Lampides boeticus;Lampides boeticus;1;Lampides boeticus;0.99999999545906;  
MN141701;Lepidoptera;Maniola jurtina;NA;0.038;NA;0.999999999999524;  
MN141702;Lepidoptera;Satyrium ilicis;Satyrium ilicis;1;Satyrium ilicis;0.99999987901305;  
MN141704;Lepidoptera;Pieris napi;NA;0.011;Pieris napi;0.801985394724814;  
MN141706;Lepidoptera;Gonepteryx cleopatra;Gonepteryx cleopatra;0.998;Gonepteryx  
cleopatra;0.999118636582266;  
MN141707;Lepidoptera;Lycaena tityrus;Lycaena tityrus;1;Lycaena tityrus;0.999997855580031;  
MN141708;Lepidoptera;Argynnis aglaja;NA;NA;Speyeria aglaja;0.872991147917853;  
MN141709;Lepidoptera;Erynnis tages;Erynnis tages;1;Erynnis tages;0.999997762421119;  
MN141710;Lepidoptera;Lampides boeticus;Lampides boeticus;1;Lampides boeticus;0.99999999545906;  
MN141711;Lepidoptera;Boloria dia;Boloria dia;1;Boloria dia;0.99999999982776;  
MN141712;Lepidoptera;Pyrgus malvoides;NA;0.016;Pyrgus malvoides;0.878050137245322;  
MN141713;Lepidoptera;Carcharodus alceae;Carcharodus alceae;1;Carcharodus  
alceae;0.999999998465938;  
MN141715;Lepidoptera;Coenonympha arcania;NA;0.316;NA;0.999999999999985;  
MN141716;Lepidoptera;Euphydryas Cynthia;Euphydryas Cynthia;1;Euphydryas  
Cynthia;0.99999999705039;  
MN141719;Lepidoptera;Aricia eumedon;Eumedonia eumedon;0.002;Eumedonia eumedon;0.998285932369328;  
MN141720;Lepidoptera;Lasioommata megera;Lasioommata megera;1;Lasioommata megera;0.999928528239676;  
MN141721;Lepidoptera;Maniola jurtina;NA;NA;Maniola jurtina;0.947923403430614;  
MN141724;Lepidoptera;Maniola jurtina;NA;0.001;Maniola jurtina;0.9392201056860875;  
MN141725;Lepidoptera;Maniola jurtina;NA;NA;Maniola jurtina;0.978516780979583;  
MN141726;Lepidoptera;Satyrus actaea;Satyrus actaea;1;Satyrus actaea;0.996105787182347;  
MN141727;Lepidoptera;Pyrgus malvoides;NA;0.176;Pyrgus malvoides;0.940490890379026;  
MN141728;Lepidoptera;Aporia crataegi;NA;NA;Aporia crataegi;0.999997860566808;  
MN141729;Lepidoptera;Cyaniris semiargus;NA;NA;Cyaniris semiargus;0.999661089144301;  
MN141730;Lepidoptera;Maniola jurtina;NA;0.012;Maniola jurtina;0.91755716175482;  
MN141731;Lepidoptera;Colias hyale;Colias hyale;0.015;Colias hyale;0.999997884296128;  
MN141732;Lepidoptera;Maniola jurtina;NA;0.078;Maniola jurtina;0.893391828716324;  
MN141736;Lepidoptera;Lycaena tityrus;Lycaena tityrus;1;Lycaena tityrus;0.999997523091023;  
MN141737;Lepidoptera;Argynnis paphia;Argynnis paphia;1;Argynnis paphia;0.999999991389927;

MN141739;Lepidoptera;Carterocephalus palaemon;NA;0.052;Carterocephalus palaemon;0.728445051795325;  
 MN141740;Lepidoptera;Ochlodes sylvanus;NA;0.316;Ochlodes sylvanus;0.996318754838625;  
 MN141741;Lepidoptera;Fabriciana niobe;NA;0.005;Fabriciana niobe;0.992125835358755;  
 MN141743;Lepidoptera;Cercyonis lupina;Hyponphele lupina;1;Hyponphele lupina;0.999999974188143;  
 MN141746;Lepidoptera;Ochlodes sylvanus;NA;0.316;Ochlodes sylvanus;0.996318754838625;  
 MN141747;Lepidoptera;Erynnis tages;Erynnis tages;1;Erynnis tages;0.999999281987018;  
 MN141748;Lepidoptera;Nymphalis c-album;NA;0.215;NA;0.999999192918557;  
 MN141749;Lepidoptera;Aricia eumedon;Eumedonia eumedon;0.002;Eumedonia eumedon;0.997793024117892;  
 MN141750;Lepidoptera;Colias alfacariensis;Colias alfacariensis;0.001;Colias alfacariensis;0.999966522684745;  
 MN141751;Lepidoptera;Coenonympha arcania;NA;0.066;Coenonympha arcania;0.980421680162585;  
 MN141752;Lepidoptera;Cupido alcetas;NA;0.218;Cupido alcetas;0.833501983138177;  
 MN141753;Lepidoptera;Cupido argiades;NA;0.498;NA;0.99999999995572;  
 MN141757;Lepidoptera;Melitaea didyma;Melitaea didyma;1;Melitaea didyma;0.999870115406424;  
 MN141758;Lepidoptera;Satyrium ilicis;Satyrium ilicis;1;Satyrium ilicis;0.99999963901758;  
 MN141759;Lepidoptera;Maniola jurtina;NA;0.001;Maniola jurtina;0.939220105860875;  
 MN141760;Lepidoptera;Satyrium w-album;Satyrium w-album;0.019;Satyrium w-album;0.998947772665936;  
 MN141761;Lepidoptera;Melanargia galathea;Melanargia galathea;NA;Melanargia galathea;0.953709022162973;  
 MN141762;Lepidoptera;Polyommatus icarus;NA;0.007;Polyommatus icarus;0.999081737461227;  
 MN141763;Lepidoptera;Pieris napi;NA;NA;NA;100.000.000.000.001;  
 MN141766;Lepidoptera;Vanessa cardui;Vanessa cardui;1;Vanessa cardui;0.999999459983318;  
 MN141767;Lepidoptera;Aricia agestis;NA;0.253;Aricia agestis;0.996350017387504;  
 MN141768;Lepidoptera;Pyrgus malvoides;NA;0.076;Pyrgus malvoides;0.887854315566122;  
 MN141769;Lepidoptera;Maniola jurtina;NA;0.012;Maniola jurtina;0.91755716175482;  
 MN141770;Lepidoptera;Parnassius apollo;Parnassius apollo;NA;Parnassius apollo;0.989436371041873;  
 MN141771;Lepidoptera;Lasiommata megera;Lasiommata megera;1;Lasiommata megera;0.999937213050311;  
 MN141773;Lepidoptera;Aricia artaxerxes;NA;0.001;Aricia artaxerxes;0.998546425606378;  
 MN141774;Lepidoptera;Araschnia levana;Araschnia levana;1;Araschnia levana;0.999999772187832;  
 MN141775;Lepidoptera;Cupido alcetas;NA;0.218;Cupido alcetas;0.833501983138177;  
 MN141776;Lepidoptera;Aricia cramera;Aricia cramera;1;Aricia cramera;0.999993731037033;  
 MN141778;Lepidoptera;Pyrgus malvoides;NA;0.076;Pyrgus malvoides;0.887854315566122;  
 MN141779;Lepidoptera;Brenthis daphne;Brenthis daphne;1;Brenthis daphne;0.999740977117052;  
 MN141780;Lepidoptera;Aricia cramera;Aricia cramera;1;Aricia cramera;0.999993731037033;  
 MN141781;Lepidoptera;Erebia meolans;Erebia meolans;NA;Erebia meolans;0.999835953426128;  
 MN141785;Lepidoptera;Boloria euphrosyne;Boloria euphrosyne;1;Boloria euphrosyne;0.999999860988633;  
 MN141786;Lepidoptera;Aricia agestis;NA;0.067;Aricia agestis;0.999509743227786;  
 MN141788;Lepidoptera;Aporia crataegi;NA;NA;Aporia crataegi;0.999998459680561;  
 MN141789;Lepidoptera;Nymphalis c-album;NA;0.215;NA;0.999999192918557;  
 MN141790;Lepidoptera;Polyommatus icarus;NA;0.004;Polyommatus icarus;0.999481683747521;  
 MN141792;Lepidoptera;Hipparchia semele;NA;NA;Hipparchia semele;0.748345401572611;  
 MN141793;Lepidoptera;Plebejus argus;NA;0.328;Plebejus argus;0.969789734199889;  
 MN141794;Lepidoptera;Brenthis daphne;Brenthis daphne;0.012;Brenthis daphne;0.980263423679187;  
 MN141795;Lepidoptera;Brintesia circe;Brintesia circe;1;Brintesia circe;0.999999898349165;  
 MN141796;Lepidoptera;Vanessa cardui;Vanessa cardui;1;Vanessa cardui;0.999999459983318;  
 MN141797;Lepidoptera;Boloria dia;Boloria dia;1;Boloria dia;0.999999999982776;  
 MN141798;Lepidoptera;Lasiommata maera;Lasiommata maera;1;Lasiommata maera;0.999997903951489;  
 MN141799;Lepidoptera;Carterocephalus palaemon;NA;0.052;Carterocephalus palaemon;0.728445051795325;  
 MN141800;Lepidoptera;Coenonympha arcania;NA;0.002;NA;0.999999999999972;  
 MN141801;Lepidoptera;Cupido alcetas;NA;0.218;Cupido alcetas;0.833501983138177;  
 MN141802;Lepidoptera;Nymphalis io;NA;0.491;Aglais io;0.930153237246992;  
 MN141803;Lepidoptera;Gonepteryx rhamni;Gonepteryx rhamni;0.008;Gonepteryx rhamni;0.999485025383278;  
 MN141806;Lepidoptera;Lysandra coridon;NA;NA;NA;0.998346382460118;  
 MN141807;Lepidoptera;Maniola jurtina;NA;0.012;Maniola jurtina;0.91755716175482;  
 MN141808;Lepidoptera;Brenthis daphne;Brenthis daphne;0.001;Brenthis daphne;0.997781825264304;  
 MN141809;Lepidoptera;Thymelicus sylvestris;Thymelicus sylvestris;1;Thymelicus sylvestris;0.999997651947126;  
 MN141811;Lepidoptera;Lycaena phlaeas;Lycaena phlaeas;1;Lycaena phlaeas;0.999999996363186;  
 MN141812;Lepidoptera;Coenonympha corinna;Coenonympha corinna;1;Coenonympha corinna;0.999999999975785;  
 MN141815;Lepidoptera;Maniola jurtina;NA;0.001;Maniola jurtina;0.939220105860875;  
 MN141816;Lepidoptera;Lysandra coridon;NA;NA;NA;0.997294061412397;  
 MN141817;Lepidoptera;Erebia mnestræ;Erebia mnestræ;0.002;Erebia mnestræ;0.999845899963913;  
 MN141818;Lepidoptera;Polyommatus icarus;NA;0.003;Polyommatus icarus;0.998348220031726;  
 MN141819;Lepidoptera;Maniola jurtina;NA;0.001;Maniola jurtina;0.939220105860875;  
 MN141821;Lepidoptera;Lasiommata maera;Lasiommata maera;1;Lasiommata maera;0.999996552555305;  
 MN141822;Lepidoptera;Ochlodes sylvanus;NA;0.316;Ochlodes sylvanus;0.996318754838625;  
 MN141824;Lepidoptera;Polyommatus thersites;Polyommatus thersites;0.002;Polyommatus thersites;0.999999884744916;  
 MN141826;Lepidoptera;Polyommatus damon;Polyommatus damon;1;Polyommatus damon;0.999999882210126;  
 MN141827;Lepidoptera;Lysandra coridon;Lysandra coridon;NA;Lysandra coridon;0.935848180514696;  
 MN141829;Lepidoptera;Aricia artaxerxes;Plebejus argus;1;Aricia artaxerxes;0.999743187199922;  
 MN141830;Lepidoptera;Lampides boeticus;Lampides boeticus;1;Lampides boeticus;0.99999999455639;  
 MN141831;Lepidoptera;Gonepteryx rhamni;NA;0.488;Gonepteryx rhamni;0.983734067561281;

MN141832;Lepidoptera;Colias crocea;NA;0.059;NA;0.999999999999738;  
MN141834;Lepidoptera;Maniola cecilia;Pyronia cecilia;1;Pyronia cecilia;1;  
MN141835;Lepidoptera;Celastrina argiolus;Celastrina argiolus;1;Celastrina  
argiolus;0.999527385150531;  
MN141836;Lepidoptera;Thymelicus acteon;Thymelicus acteon;1;Thymelicus acteon;0.99999998299444;  
MN141837;Lepidoptera;Celastrina argiolus;Celastrina argiolus;1;Celastrina  
argiolus;0.998625501352879;  
MN141838;Lepidoptera;Maniola jurtina;NA;NA;Maniola jurtina;0.960669898316795;  
MN141841;Lepidoptera;Plebejus argus;NA;0.108;Plebejus argus;0.968558607851385;  
MN141842;Lepidoptera;Fabriciana adippe;Fabriciana adippe;0.007;Fabriciana  
adippe;0.876018745965171;  
MN141843;Lepidoptera;Scolitantides orion;Scolitantides orion;1;Scolitantides  
orion;0.999999984804305;  
MN141846;Lepidoptera;Hipparchia hermione;NA;NA;Hipparchia hermione;0.75858830303256;  
MN141847;Lepidoptera;Lycaena alciphron;Lycaena alciphron;1;Lycaena alciphron;0.999999856207079;  
MN141849;Lepidoptera;Anthocharis cardamines;Anthocharis cardamines;0.001;Anthocharis  
cardamines;0.999999946658876;  
MN141850;Lepidoptera;Lasiommata megera;Lasiommata megera;1;Lasiommata megera;0.999928528239676;  
MN141851;Lepidoptera;Thymelicus sylvestris;Thymelicus sylvestris;1;Thymelicus  
sylvestris;0.999999981568351;  
MN141853;Lepidoptera;Pyrgus malvoides;NA;0.173;Pyrgus malvoides;0.901220937466329;  
MN141854;Lepidoptera;Cupido argiades;NA;0.495;NA;0.999999999991152;  
MN141855;Lepidoptera;Aricia agestis;NA;0.214;Aricia agestis;0.988717764830887;  
MN141856;Lepidoptera;Vanessa cardui;Vanessa cardui;1;Vanessa cardui;0.999999803450484;  
MN141857;Lepidoptera;Colias crocea;NA;0.059;NA;0.999999999999738;  
MN141859;Lepidoptera;Maniola jurtina;NA;0.001;Maniola jurtina;0.939220105860875;  
MN141861;Lepidoptera;Maniola tithonus;Pyronia tithonus;1;Pyronia tithonus;1;  
MN141863;Lepidoptera;Melitaea britomartis;NA;NA;Melitaea britomartis;0.956350416682137;  
MN141864;Lepidoptera;Aricia cramera;Aricia cramera;1;Aricia cramera;0.999993731037033;  
MN141865;Lepidoptera;Lasiommata maera;Lasiommata maera;1;Lasiommata maera;0.999997663475712;  
MN141866;Lepidoptera;Colias palaeno;NA;NA;NA;0.99999998051059;  
MN141868;Lepidoptera;Favonius quercus;NA;NA;Favonius quercus;0.73046069582187;  
MN141869;Lepidoptera;Carcharodus alceae;Carcharodus alceae;0.999;Carcharodus  
alceae;0.999999998008462;  
MN141870;Lepidoptera;Ochlodes sylvanus;NA;0.316;Ochlodes sylvanus;0.996318754838625;  
MN141871;Lepidoptera;Maniola cecilia;Pyronia cecilia;1;Pyronia cecilia;1;  
MN141873;Lepidoptera;Thymelicus lineola;Thymelicus lineola;1;Thymelicus  
lineola;0.999993664249194;  
MN141875;Lepidoptera;Aricia agestis;NA;0.081;Aricia agestis;0.998857812762894;  
MN141876;Lepidoptera;Aglais urticae;Aglais urticae;0.001;Aglais urticae;0.994396335177485;  
MN141877;Lepidoptera;Pyrgus carthami;Pyrgus carthami;1;Pyrgus carthami;0.999997085657879;  
MN141878;Lepidoptera;Lycaena thersamon;Lycaena thersamon;0.001;Lycaena  
thersamon;0.952360353045614;  
MN141879;Lepidoptera;Thymelicus sylvestris;NA;0.131;Thymelicus sylvestris;0.999953952029014;  
MN141881;Lepidoptera;Pieris napi;NA;0.028;Pieris napi;0.888205720664699;  
MN141882;Lepidoptera;Maniola jurtina;NA;0.001;Maniola jurtina;0.939220105860875;  
MN141883;Lepidoptera;Erebia euryale;NA;NA;Erebia euryale;0.910388832226942;  
MN141884;Lepidoptera;Brenthis ino;Brenthis ino;1;Brenthis ino;0.999575084556096;  
MN141885;Lepidoptera;Argynnis aglaja;NA;0.002;Speyeria aglaja;0.87239079736947;  
MN141886;Lepidoptera;Carcharodus alceae;Carcharodus alceae;0.999;Carcharodus  
alceae;0.999999996339511;  
MN141888;Lepidoptera;Argynnis paphia;Argynnis paphia;1;Argynnis paphia;0.999999991389927;  
MN141889;Lepidoptera;Charaxes jasius;Charaxes jasius;NA;Charaxes jasius;0.995860724722804;  
MN141890;Lepidoptera;Coenonympha pamphilus;Coenonympha pamphilus;1;Coenonympha  
pamphilus;0.999999999999744;  
MN141891;Lepidoptera;Boloria euphrosyne;Boloria euphrosyne;1;Boloria  
euphrosyne;0.999996904544576;  
MN141893;Lepidoptera;Pieris napi;NA;0.011;Pieris napi;0.801985394724814;  
MN141894;Lepidoptera;Coenonympha pamphilus;Coenonympha pamphilus;1;Coenonympha  
pamphilus;0.999999999999744;  
MN141895;Lepidoptera;Anthocharis cardamines;Anthocharis cardamines;1;Anthocharis  
cardamines;0.99999997953563;  
MN141896;Lepidoptera;Nymphalis io;NA;0.491;Aglais io;0.930153237246992;  
MN141897;Lepidoptera;Maniola jurtina;NA;0.149;NA;0.999999999998573;  
MN141901;Lepidoptera;Satyrium ilicis;Satyrium ilicis;1;Satyrium ilicis;0.999999876179523;  
MN141904;Lepidoptera;Aricia cramera;Aricia cramera;1;Aricia cramera;0.999993731037033;  
MN141907;Lepidoptera;Callophrys rubi;NA;0.001;Callophrys rubi;0.998885705938309;  
MN141908;Lepidoptera;Pyrgus carlinae;NA;NA;Pyrgus carlinae;0.854199018204849;  
MN141909;Lepidoptera;Maniola jurtina;NA;NA;Maniola jurtina;0.949988160645333;  
MN141910;Lepidoptera;Erebia pronoe;Erebia pronoe;1;Erebia pronoe;0.999250891771858;  
MN141913;Lepidoptera;Colias crocea;NA;0.059;NA;0.999999999999738;  
MN141914;Lepidoptera;Erebia melampus;Erebia melampus;0.011;Erebia melampus;0.975499903768874;  
MN141915;Lepidoptera;Brintesia circe;Brintesia circe;NA;Brintesia circe;0.999999876757251;  
MN141916;Lepidoptera;Pyrgus malvoides;NA;0.176;Pyrgus malvoides;0.940490890379026;  
MN141917;Lepidoptera;Argynnis paphia;Argynnis paphia;1;Argynnis paphia;0.999999991389927;  
MN141918;Lepidoptera;Apatura ilia;NA;NA;Apatura ilia;0.949170032443637;  
MN141919;Lepidoptera;Hipparchia fagi;NA;NA;Hipparchia fagi;0.943552964827347;



MN141921;Lepidoptera;Aphantopus hyperantus;Aphantopus hyperantus;0.002;Aphantopus hyperantus;0.999998799685936;  
 MN141923;Lepidoptera;Callophrys rubi;NA;0.003;Callophrys rubi;0.997328639918919;  
 MN141924;Lepidoptera;Pararge aegeria;Pararge aegeria;1;Pararge aegeria;0.99999999963165;  
 MN141925;Lepidoptera;Thymelicus lineola;Thymelicus lineola;1;Thymelicus lineola;0.999995927238524;  
 MN141927;Lepidoptera;Agriades optilete;Agriades optilete;1;Agriades optilete;0.999999963980316;  
 MN141929;Lepidoptera;Maniola jurtina;NA;0.012;Maniola jurtina;0.91755716175482;  
 MN141930;Lepidoptera;Pyrgus malvae;Pyrgus malvae;NA;Pyrgus malvae;0.980121140374433;  
 MN141931;Lepidoptera;Polyommatus icarus;NA;0.002;Polyommatus icarus;0.999495789525348;  
 MN141932;Lepidoptera;Colias crocea;NA;0.059;NA;0.99999999999738;  
 MN141933;Lepidoptera;Aricia agestis;NA;0.253;Aricia agestis;0.996350017387504;  
 MN141934;Lepidoptera;Maniola tithonus;Pyronia tithonus;1;Pyronia tithonus;1;  
 MN141935;Lepidoptera;Plebejus argus;NA;0.328;Plebejus argus;0.969789734199889;  
 MN141936;Lepidoptera;Chazara briseis;Chazara briseis;0.999;Chazara briseis;0.999971602301006;  
 MN141937;Lepidoptera;Fabriciana adippe;NA;NA;Fabriciana adippe;0.922280384106682;  
 MN141939;Lepidoptera;Maniola jurtina;NA;NA;NA;0.9999999985062;  
 MN141940;Lepidoptera;Ochlodes sylvanus;NA;0.316;Ochlodes sylvanus;0.996318754838625;  
 MN141941;Lepidoptera;Maniola jurtina;NA;0.012;Maniola jurtina;0.91755716175482;  
 MN141947;Lepidoptera;Argynnis aglaja;NA;0.028;Speyeria aglaja;0.716139793049776;  
 MN141948;Lepidoptera;Colias phicomone;NA;0.001;Colias phicomone;0.985598879697681;  
 MN141950;Lepidoptera;Thymelicus sylvestris;NA;0.324;Thymelicus sylvestris;0.999940778442454;  
 MN141952;Lepidoptera;Pyrgus malvoides;Pyrgus malvoides;0.023;Pyrgus malvoides;0.933543811475575;  
 MN141953;Lepidoptera;Melanargia galathea;Melanargia galathea;NA;Melanargia galathea;0.970417110336134;  
 MN141954;Lepidoptera;Gegenes nostrodamus;Gegenes nostrodamus;1;Gegenes nostrodamus;0.999999996883645;  
 MN141955;Lepidoptera;Aricia cramera;Aricia cramera;1;Aricia cramera;0.999993731037033;  
 MN141956;Lepidoptera;Limenitis camilla;NA;0.22;Limenitis camilla;0.999994218894925;  
 MN141960;Lepidoptera;Thymelicus lineola;Thymelicus lineola;1;Thymelicus lineola;0.999997391180777;  
 MN141961;Lepidoptera;Erynnis tages;Erynnis tages;1;Erynnis tages;0.999999281987018;  
 MN141962;Lepidoptera;Maniola jurtina;NA;0.001;Maniola jurtina;0.939631013786701;  
 MN141963;Lepidoptera;Thymelicus acteon;Thymelicus acteon;1;Thymelicus acteon;0.999999992643382;  
 MN141964;Lepidoptera;Lycaena alciphron;Lycaena alciphron;1;Lycaena alciphron;0.999999956703477;  
 MN141965;Lepidoptera;Colias crocea;NA;0.059;NA;0.99999999999738;  
 MN141966;Lepidoptera;Aricia agestis;NA;0.253;Aricia agestis;0.996350017387504;  
 MN141968;Lepidoptera;Oeneis glacialis;Oeneis glacialis;NA;Oeneis glacialis;0.974851412684016;  
 MN141973;Lepidoptera;Satyrium pruni;NA;0.076;Satyrium pruni;0.990322364021655;  
 MN141974;Lepidoptera;Lasiommata maera;Lasiommata maera;1;Lasiommata maera;0.99999510792253;  
 MN141975;Lepidoptera;Maniola jurtina;NA;0.171;Maniola jurtina;0.963697912386445;  
 MN141976;Lepidoptera;Maniola jurtina;NA;0.001;Maniola jurtina;0.939220105860875;  
 MN141977;Lepidoptera;Hipparchia semele;NA;NA;Hipparchia semele;0.748345401572611;  
 MN141978;Lepidoptera;Coenonympha pamphilus;Coenonympha pamphilus;1;Coenonympha pamphilus;0.99999999997016;  
 MN141979;Lepidoptera;Polyommatus thersites;Polyommatus thersites;1;Polyommatus thersites;0.99999899143438;  
 MN141981;Lepidoptera;Plebejus idas;NA;0.004;NA;0.999605698719885;  
 MN141982;Lepidoptera;Lysandra hispana;NA;NA;NA;0.999946396695616;  
 MN141983;Lepidoptera;Limenitis camilla;NA;0.111;Limenitis camilla;0.999994863389877;  
 MN141984;Lepidoptera;Lasiommata megera;Lasiommata megera;1;Lasiommata megera;0.999379144055441;  
 MN141985;Lepidoptera;Nymphalis c-album;NA;0.082;NA;0.99999288683343;  
 MN141988;Lepidoptera;Coenonympha glycerion;NA;0.28;Coenonympha glycerion;0.99998036263913;  
 MN141989;Lepidoptera;Polyommatus amandus;Polyommatus amandus;0.006;Polyommatus amandus;0.999984603640236;  
 MN141990;Lepidoptera;Aporia crataegi;NA;NA;Aporia crataegi;0.999991678455536;  
 MN141991;Lepidoptera;Maniola jurtina;NA;0.001;Maniola jurtina;0.939220105860875;  
 MN141992;Lepidoptera;Pieris napi;NA;0.011;Pieris napi;0.801985394724814;  
 MN141993;Lepidoptera;Pieris napi;NA;0.008;Pieris napi;0.840314219469586;  
 MN141996;Lepidoptera;Pyrgus warrenensis;NA;0.003;NA;0.99999999997732;  
 MN141999;Lepidoptera;Maniola jurtina;NA;0.001;Maniola jurtina;0.939220105860875;  
 MN142000;Lepidoptera;Erebia euryale;NA;NA;Erebia euryale;0.841345499213796;  
 MN142001;Lepidoptera;Argynnis paphia;Argynnis paphia;1;Argynnis paphia;0.999999991389927;  
 MN142002;Lepidoptera;Argynnis aglaja;NA;NA;NA;0.99999999998051;  
 MN142003;Lepidoptera;Hipparchia fagi;Hipparchia fagi;NA;Hipparchia fagi;0.986566456150817;  
 MN142004;Lepidoptera;Pyrgus malvoides;NA;0.053;Pyrgus malvoides;0.959164206737781;  
 MN142006;Lepidoptera;Colias alfacariensis;Colias alfacariensis;0.001;Colias alfacariensis;0.999926026317526;  
 MN142008;Lepidoptera;Chazara briseis;Chazara briseis;1;Chazara briseis;0.999980393060755;  
 MN142009;Lepidoptera;Gonepteryx cleopatra;Gonepteryx cleopatra;0.998;Gonepteryx cleopatra;0.999118636582266;  
 MN142010;Lepidoptera;Colias phicomone;NA;0.056;Colias phicomone;0.992012393074245;  
 MN142011;Lepidoptera;Polyommatus thersites;Polyommatus thersites;0.999;Polyommatus thersites;0.999999810972884;  
 MN142012;Lepidoptera;Carcharodus alceae;Carcharodus alceae;0.001;Carcharodus alceae;0.999999970193983;  
 MN142013;Lepidoptera;Maniola jurtina;NA;0.001;Maniola jurtina;0.939220105860875;

MN142015;Lepidoptera;Polyommatus escheri;Polyommatus escheri;1;Polyommatus escheri;0.9999999714708;  
MN142017;Lepidoptera;Pieris napi;NA;0.066;Pieris napi;0.832895481558215;  
MN142018;Lepidoptera;Hipparchia fagi;Hipparchia fagi;NA;Hipparchia fagi;0.945096371002546;  
MN142019;Lepidoptera;Pieris napi;NA;0.011;Pieris napi;0.801985394724814;  
MN142020;Lepidoptera;Lycaena alciphron;Lycaena alciphron;1;Lycaena alciphron;0.999999942959564;  
MN142021;Lepidoptera;Euphydryas intermedia;NA;0.13;NA;0.99999999997684;  
MN142022;Lepidoptera;Colias crocea;NA;0.059;NA;0.99999999999738;  
MN142023;Lepidoptera;Erebia oeme;NA;0.114;Erebia oeme;0.99999999830635;  
MN142024;Lepidoptera;Erebia eriphyle;Erebia eriphyle;1;Erebia eriphyle;0.999999983979336;  
MN142025;Lepidoptera;Cupido minimus;NA;0.006;Cupido minimus;0.999768371759258;  
MN142026;Lepidoptera;Melitaea cinxia;Melitaea cinxia;1;Melitaea cinxia;0.99999999999801;  
MN142028;Lepidoptera;Lysandra coridon;NA;NA;Lysandra coridon;0.749217519592352;  
MN142029;Lepidoptera;Polyommatus amandus;Polyommatus amandus;1;Polyommatus amandus;0.999993368166194;  
MN142031;Lepidoptera;Lycaena tityrus;Lycaena tityrus;1;Lycaena tityrus;0.999998928238034;  
MN142032;Lepidoptera;Parnassius apollo;Parnassius apollo;1;Parnassius apollo;0.992704703916692;  
MN142033;Lepidoptera;Pieris napi;NA;NA;Pieris napi;0.929591877726186;  
MN142035;Lepidoptera;Aporia crataegi;NA;NA;Aporia crataegi;0.999987257782532;  
MN142037;Lepidoptera;Pyrgus cacaliae;Pyrgus cacaliae;0.999;Pyrgus cacaliae;0.99258001670677;  
MN142038;Lepidoptera;Colias palaeno;NA;0.001;NA;0.99999999982869;  
MN142039;Lepidoptera;Lysandra coridon;NA;NA;NA;0.998070184737648;  
MN142040;Lepidoptera;Lycaena alciphron;Lycaena alciphron;1;Lycaena alciphron;0.99999925232376;  
MN142041;Lepidoptera;Polyommatus icarus;Polyommatus icarus;0.001;Polyommatus icarus;0.999539088451348;  
MN142041;Lepidoptera;Polyommatus icarus;Polyommatus icarus;0.001;Polyommatus icarus;0.999539088451348;  
MN142044;Lepidoptera;Maniola jurtina;NA;NA;Maniola jurtina;0.979727053537369;  
MN142046;Lepidoptera;Maniola jurtina;NA;0.001;Maniola jurtina;0.939220105860875;  
MN142047;Lepidoptera;Lysandra coridon;Lysandra coridon;NA;Lysandra coridon;0.935848180514696;  
MN142048;Lepidoptera;Maniola jurtina;NA;0.012;Maniola jurtina;0.91755716175482;  
MN142050;Lepidoptera;Cupido minimus;NA;0.006;Cupido minimus;0.999768371759258;  
MN142053;Lepidoptera;Favonius quercus;NA;NA;Favonius quercus;0.738637895579293;  
MN142055;Lepidoptera;Arethusana arethusana;Arethusana arethusana;0.019;Arethusana arethusana;0.999964353716342;  
MN142058;Lepidoptera;Melitaea didyma;Melitaea didyma;1;Melitaea didyma;0.992165146696479;  
MN142059;Lepidoptera;Erebia medusa;NA;0.002;Erebia medusa;0.991052367627986;  
MN142060;Lepidoptera;Thymelicus acteon;Thymelicus acteon;1;Thymelicus acteon;0.999999994028798;  
MN142061;Lepidoptera;Polyommatus dorylas;Polyommatus dorylas;0.005;Polyommatus dorylas;0.987518562410738;  
MN142062;Lepidoptera;Erynnis tages;Erynnis tages;1;Erynnis tages;0.999999008168069;  
MN142063;Lepidoptera;Euphydryas aurinia;NA;0.31;Euphydryas aurinia;0.993387708761386;  
MN142064;Lepidoptera;Colias crocea;NA;0.059;NA;0.99999999999738;  
MN142065;Lepidoptera;Brenthis hecate;NA;0.083;Brenthis hecate;0.999707638996184;  
MN142066;Lepidoptera;Lasiommata maera;Lasiommata maera;1;Lasiommata maera;0.99999510792253;  
MN142067;Lepidoptera;Plebejus argus;Plebejus argus;0.001;Plebejus argus;0.963830271620612;  
MN142068;Lepidoptera;Melitaea didyma;Melitaea didyma;1;Melitaea didyma;0.999958786401868;  
MN142070;Lepidoptera;Plebejus argus;Plebejus argus;0.004;Plebejus argus;0.989715396991954;  
MN142071;Lepidoptera;Coenonympha pamphilus;Coenonympha pamphilus;1;Coenonympha pamphilus;0.99999999999744;  
MN142072;Lepidoptera;Anthocharis euphenoides;NA;0.172;Anthocharis euphenoides;0.943741664916385;  
MN142073;Lepidoptera;Cyaniris semiargus;Cyaniris semiargus;NA;Cyaniris semiargus;0.999666214017365;  
MN142074;Lepidoptera;Colias hyale;Colias hyale;0.015;Colias hyale;0.999997884296128;  
MN142075;Lepidoptera;Satyrium ilicis;Satyrium ilicis;1;Satyrium ilicis;0.99999963901758;  
MN142076;Lepidoptera;Melitaea diamina;NA;0.305;Melitaea diamina;0.999999994065661;  
MN142077;Lepidoptera;Argynnis aglaja;NA;NA;Speyeria aglaja;0.872991147917853;  
MN142078;Lepidoptera;Euphydryas maturna;Euphydryas maturna;1;Euphydryas maturna;0.893551409890867;  
MN142079;Lepidoptera;Argynnis paphia;Argynnis paphia;1;Argynnis paphia;0.999999991389927;  
MN142081;Lepidoptera;Celastrina argiolus;Celastrina argiolus;1;Celastrina argiolus;0.999527385150531;  
MN142082;Lepidoptera;Nymphalis antiopa;NA;0.199;Nymphalis antiopa;0.9999989063972;  
MN142084;Lepidoptera;Thymelicus sylvestris;NA;0.108;Thymelicus sylvestris;0.999941946746535;  
MN142085;Lepidoptera;Euphydryas aurinia;NA;0.129;Euphydryas aurinia;0.98446030315915;  
MN142086;Lepidoptera;Lampides boeticus;Lampides boeticus;1;Lampides boeticus;0.9999999951757;  
MN142087;Lepidoptera;Gonepteryx rhamni;NA;0.474;Gonepteryx rhamni;0.982076396127858;  
MN142088;Lepidoptera;Polyommatus icarus;NA;0.13;Polyommatus icarus;0.979762695748748;  
MN142088;Lepidoptera;Polyommatus icarus;NA;0.13;Polyommatus icarus;0.979762695748748;  
MN142089;Lepidoptera;Melitaea cinxia;Melitaea cinxia;1;Melitaea cinxia;0.99999999999574;  
MN142090;Lepidoptera;Plebejus argus;NA;0.328;Plebejus argus;0.969789734199889;  
MN142091;Lepidoptera;Maniola jurtina;NA;0.001;Maniola jurtina;0.939220105860875;  
MN142092;Lepidoptera;Apatura ilia;Apatura ilia;0.009;Apatura ilia;0.989372646116092;  
MN142093;Lepidoptera;Boloria selene;NA;0.077;Boloria selene;0.999999315485588;  
MN142094;Lepidoptera;Argynnis paphia;Argynnis paphia;1;Argynnis paphia;0.999999991389927;  
MN142095;Lepidoptera;Lasiommata megera;Lasiommata megera;1;Lasiommata megera;0.999928528239676;  
MN142096;Lepidoptera;Cyaniris semiargus;NA;NA;Cyaniris semiargus;0.999124580397959;  
MN142097;Lepidoptera;Lasiommata megera;Lasiommata megera;1;Lasiommata megera;0.999928528239676;

MN142098;Lepidoptera;Parnassius mnemosyne;Parnassius mnemosyne;1;Parnassius  
mnemosyne;0.999999584180132;  
MN142099;Lepidoptera;Callophrys rubi;NA;0.001;Callophrys rubi;0.99870518510598;  
MN142100;Lepidoptera;Celastrina argiolus;Celastrina argiolus;1;Celastrina  
argiolus;0.999527385150531;  
MN142103;Lepidoptera;Hipparchia hermione;NA;NA;NA;0.999999999999935;  
MN142104;Lepidoptera;Euphydryas aurinia;NA;0.106;Euphydryas aurinia;0.993939072040577;  
MN142105;Lepidoptera;Plebejus argus;Plebejus argus;0.001;Plebejus argus;0.963830271620612;  
MN142106;Lepidoptera;Pyrgus serratulae;Pyrgus serratulae;1;Pyrgus serratulae;0.9999989567508;  
MN142107;Lepidoptera;Polyommatus icarus;NA;0.13;Polyommatus icarus;0.979762695748748;  
MN142107;Lepidoptera;Polyommatus icarus;NA;0.13;Polyommatus icarus;0.979762695748748;  
MN142108;Lepidoptera;Polyommatus icarus;NA;0.004;Polyommatus icarus;0.999481683747521;  
MN142108;Lepidoptera;Polyommatus icarus;NA;0.004;Polyommatus icarus;0.999481683747521;  
MN142110;Lepidoptera;Boloria titania;Boloria titania;1;Boloria titania;0.999892378080509;  
MN142111;Lepidoptera;Melitaea didyma;Melitaea didyma;1;Melitaea didyma;0.992165146696479;  
MN142112;Lepidoptera;Cupido osiris;Cupido osiris;1;Cupido osiris;0.99999942853713;  
MN142113;Lepidoptera;Coenonympha dorus;Coenonympha dorus;1;Coenonympha dorus;0.99999999634412;  
MN142114;Lepidoptera;Polyommatus amandus;Polyommatus amandus;0.003;Polyommatus  
amandus;0.999980071833264;  
MN142115;Lepidoptera;Glaucopsyche alexis;Glaucopsyche alexis;0.001;Glaucopsyche  
alexis;0.94042380088325;  
MN142116;Lepidoptera;Cercyonis lupina;Hyponephele lupina;1;Hyponephele lupina;0.99999987497034;  
MN142118;Lepidoptera;Polyommatus icarus;NA;0.003;Polyommatus icarus;0.986125651677522;  
MN142118;Lepidoptera;Polyommatus icarus;NA;0.003;Polyommatus icarus;0.986125651677522;  
MN142119;Lepidoptera;Melitaea cinxia;Melitaea cinxia;1;Melitaea cinxia;0.99999999999829;  
MN142120;Lepidoptera;Polyommatus amandus;Polyommatus amandus;0.003;Polyommatus  
amandus;0.999980071833264;  
MN142121;Lepidoptera;Pyrgus serratulae;Pyrgus serratulae;1;Pyrgus serratulae;0.9999989567508;  
MN142122;Lepidoptera;Cupido alcetas;NA;0.218;Cupido alcetas;0.833501983138177;  
MN142123;Lepidoptera;Coenonympha pamphilus;Coenonympha pamphilus;1;Coenonympha  
pamphilus;0.999999999999744;  
MN142126;Lepidoptera;Pyrgus malvoides;NA;0.176;Pyrgus malvoides;0.940490890379026;  
MN142127;Lepidoptera;Thymelicus acteon;Thymelicus acteon;1;Thymelicus acteon;0.99999991858658;  
MN142128;Lepidoptera;Melitaea cinxia;Melitaea cinxia;1;Melitaea cinxia;0.99999999999744;  
MN142129;Lepidoptera;Polyommatus eros;NA;0.001;Polyommatus eros;0.964824734695436;  
MN142130;Lepidoptera;Polyommatus daphnis;Polyommatus daphnis;1;Polyommatus  
daphnis;0.999937221723078;  
MN142131;Lepidoptera;Pieris napi;NA;0.011;Pieris napi;0.801985394724814;  
MN142132;Lepidoptera;Maniola jurtina;NA;0.012;Maniola jurtina;0.91755716175482;  
MN142133;Lepidoptera;Polyommatus icarus;Polyommatus icarus;0.001;Polyommatus  
icarus;0.999851522482238;  
MN142133;Lepidoptera;Polyommatus icarus;Polyommatus icarus;0.001;Polyommatus  
icarus;0.999851522482238;  
MN142134;Lepidoptera;Erebia tyndarus;NA;NA;Erebia tyndarus;0.757030861596122;  
MN142135;Lepidoptera;Hipparchia fidia;Hipparchia fidia;1;Hipparchia fidia;1;  
MN142136;Lepidoptera;Coenonympha pamphilus;Coenonympha pamphilus;1;Coenonympha  
pamphilus;0.999999999999744;  
MN142139;Lepidoptera;Thymelicus lineola;Thymelicus lineola;1;Thymelicus  
lineola;0.999995927238524;  
MN142141;Lepidoptera;Vanessa cardui;Vanessa cardui;1;Vanessa cardui;0.999999459983318;  
MN142143;Lepidoptera;Plebejus argus;NA;0.124;Plebejus argus;0.971505336971418;  
MN142146;Lepidoptera;Polyommatus icarus;NA;0.003;Polyommatus icarus;0.998348220031726;  
MN142146;Lepidoptera;Polyommatus icarus;NA;0.003;Polyommatus icarus;0.998348220031726;  
MN142147;Lepidoptera;Erebia melampus;NA;NA;Erebia melampus;0.941746591257433;  
MN142148;Lepidoptera;Polyommatus celina;Polyommatus celina;0.001;Polyommatus  
celina;0.999999999717033;  
MN142149;Lepidoptera;Polyommatus icarus;NA;0.007;Polyommatus icarus;0.999081737461227;  
MN142149;Lepidoptera;Polyommatus icarus;NA;0.007;Polyommatus icarus;0.999081737461227;  
MN142150;Lepidoptera;Favonius quercus;NA;0.002;Favonius quercus;0.732659082125295;  
MN142151;Lepidoptera;Iolana iolas;Iolana iolas;1;Iolana iolas;0.999996756871981;  
MN142153;Lepidoptera;Polyommatus dorylas;Polyommatus dorylas;0.005;Polyommatus  
dorylas;0.987518562410738;  
MN142154;Lepidoptera;Anthocharis cardamines;Anthocharis cardamines;1;Anthocharis  
cardamines;0.99999805933546;  
MN142155;Lepidoptera;Maniola jurtina;NA;0.001;Maniola jurtina;0.939220105860875;  
MN142156;Lepidoptera;Maniola jurtina;NA;0.078;Maniola jurtina;0.858475545239305;  
MN142157;Lepidoptera;Lasiommata megera;Lasiommata megera;1;Lasiommata megera;0.999379144055441;  
MN142159;Lepidoptera;Maniola jurtina;NA;0.002;Maniola jurtina;0.915080469606948;  
MN142161;Lepidoptera;Aricia artaxerxes;NA;0.394;Aricia artaxerxes;0.999502890976379;  
MN142163;Lepidoptera;Brenthis ino;Brenthis ino;0.001;Brenthis ino;0.998434780405276;  
MN142164;Lepidoptera;Cupido argiades;NA;0.499;NA;0.99999999984682;  
MN142165;Lepidoptera;Aglaia urticae;NA;0.002;Aglaia urticae;0.987497593219019;  
MN142168;Lepidoptera;Maniola jurtina;NA;0.001;Maniola jurtina;0.939220105860875;  
MN142169;Lepidoptera;Plebejus argus;NA;0.328;Plebejus argus;0.969789734199889;  
MN142170;Lepidoptera;Satyrium pruni;NA;0.076;Satyrium pruni;0.990322364021655;  
MN142171;Lepidoptera;Aporia crataegi;NA;0.003;Aporia crataegi;0.999999100143817;  
MN142172;Lepidoptera;Maniola jurtina;NA;0.012;Maniola jurtina;0.91755716175482;  
MN142173;Lepidoptera;Aricia eumedon;Eumedonia eumedon;0.002;Eumedonia eumedon;0.997434540282035;

MN142175;Lepidoptera;Aphantopus hyperantus;Aphantopus hyperantus;0.003;Aphantopus hyperantus;0.999999455871523;  
MN142177;Lepidoptera;Brenthis ino;NA;0.031;Brenthis ino;0.796814350318661;  
MN142178;Lepidoptera;Maniola jurtina;NA;0.012;Maniola jurtina;0.91755716175482;  
MN142179;Lepidoptera;Pyrgus malvae;Pyrgus malvae;NA;Pyrgus malvae;0.980121140374433;  
MN142180;Lepidoptera;Melitaea didyma;NA;NA;Melitaea didyma;0.981993619455166;  
MN142183;Lepidoptera;Pyrgus andromedae;Pyrgus andromedae;0.001;Pyrgus andromedae;0.998916242550561;  
MN142185;Lepidoptera;Lasiommata megera;Lasiommata megera;1;Lasiommata megera;0.999928528239676;  
MN142186;Lepidoptera;Aporia crataegi;NA;NA;Aporia crataegi;0.999996781126733;  
MN142189;Lepidoptera;Anthocharis cardamines;Anthocharis cardamines;1;Anthocharis cardamines;0.9999997953563;  
MN142190;Lepidoptera;Boloria euphrosyne;Boloria euphrosyne;0.001;Boloria euphrosyne;0.999985640170951;  
MN142191;Lepidoptera;Maniola cecilia;Pyronia cecilia;1;Pyronia cecilia;0.999999999999972;  
MN142192;Lepidoptera;Lycaena phlaeas;Lycaena phlaeas;1;Lycaena phlaeas;0.999999996363186;  
MN142193;Lepidoptera;Chazara briseis;Chazara briseis;1;Chazara briseis;0.999988003455793;  
MN142195;Lepidoptera;Pyrgus carthami;Pyrgus carthami;0.999;Pyrgus carthami;0.999997055710495;  
MN142198;Lepidoptera;Maniola jurtina;NA;0.001;Maniola jurtina;0.939220105860875;  
MN142202;Lepidoptera;Aricia artaxerxes;NA;0.001;Aricia artaxerxes;0.998546425606378;  
MN142203;Lepidoptera;Thymelicus lineola;Thymelicus lineola;1;Thymelicus lineola;0.999971535093703;  
MN142204;Lepidoptera;Coenonympha dorus;Coenonympha dorus;1;Coenonympha dorus;0.99999999719762;  
MN142205;Lepidoptera;Gonepteryx rhamni;NA;0.474;Gonepteryx rhamni;0.982076396127858;  
MN142207;Lepidoptera;Hyponephele lycaon;Hyponephele lycaon;1;Hyponephele lycaon;0.9999999909889;  
MN142208;Lepidoptera;Fabriciana adippe;Fabriciana adippe;0.001;Fabriciana adippe;0.985680812514845;  
MN142210;Lepidoptera;Aporia crataegi;NA;NA;Aporia crataegi;0.999996781126733;  
MN142211;Lepidoptera;Lampides boeticus;Lampides boeticus;1;Lampides boeticus;0.99999999545906;  
MN142212;Lepidoptera;Coenonympha pamphilus;Coenonympha pamphilus;1;Coenonympha pamphilus;0.99999999999744;  
MN142213;Lepidoptera;Maniola jurtina;NA;0.001;Maniola jurtina;0.939220105860875;  
MN142214;Lepidoptera;Gegenes pumilio;Gegenes pumilio;1;Gegenes pumilio;0.999986726679266;  
MN142215;Lepidoptera;Anthocharis cardamines;Anthocharis cardamines;1;Anthocharis cardamines;0.9999998955139;  
MN142216;Lepidoptera;Lasiommata maera;Lasiommata maera;1;Lasiommata maera;0.99999510792253;  
MN142217;Lepidoptera;Erynnis tages;Erynnis tages;1;Erynnis tages;0.99999281987018;  
MN142218;Lepidoptera;Boloria euphrosyne;Boloria euphrosyne;0.001;Boloria euphrosyne;0.999985640170951;  
MN142220;Lepidoptera;Vanessa cardui;Vanessa cardui;1;Vanessa cardui;0.999997797117242;  
MN142221;Lepidoptera;Vanessa cardui;Vanessa cardui;1;Vanessa cardui;0.999999803450484;  
MN142222;Lepidoptera;Coenonympha pamphilus;Coenonympha pamphilus;1;Coenonympha pamphilus;0.999999999991701;  
MN142223;Lepidoptera;Hipparchia semele;NA;0.001;Hipparchia semele;0.854753018224066;  
MN142224;Lepidoptera;Parnassius apollo;Parnassius apollo;1;Parnassius apollo;0.997730833218986;  
MN142226;Lepidoptera;Erynnis tages;Erynnis tages;1;Erynnis tages;0.99999281987018;  
MN142227;Lepidoptera;Aricia eumedon;Eumedonia eumedon;0.01;Eumedonia eumedon;0.990061810599567;  
MN142229;Lepidoptera;Thymelicus lineola;Thymelicus lineola;1;Thymelicus lineola;0.999995927238524;  
MN142232;Lepidoptera;Argynnis aglaja;NA;NA;Speyeria aglaja;0.872991147917853;  
MN142233;Lepidoptera;Erebia montana;Erebia montana;1;Erebia montana;0.99978250115925;  
MN142234;Lepidoptera;Erebia epiphron;Erebia epiphron;NA;Erebia epiphron;0.991961897898469;  
MN142235;Lepidoptera;Lycaena phlaeas;Lycaena phlaeas;1;Lycaena phlaeas;0.999999996363186;  
MN142236;Lepidoptera;Erebia medusa;NA;0.009;Erebia medusa;0.986275612856827;  
MN142238;Lepidoptera;Polyommatus daphnis;Polyommatus daphnis;1;Polyommatus daphnis;0.99977716269156;  
MN142239;Lepidoptera;Lycaena tityrus;Lycaena tityrus;1;Lycaena tityrus;0.999997027007808;  
MN142240;Lepidoptera;Nymphalis c-album;NA;0.079;NA;0.99998597412739;  
MN142241;Lepidoptera;Polyommatus dolus;Polyommatus dolus;0.001;Polyommatus dolus;0.945738812333627;  
MN142243;Lepidoptera;Lycaena alciphron;Lycaena alciphron;1;Lycaena alciphron;0.999999925232376;  
MN142244;Lepidoptera;Thymelicus sylvestris;NA;0.324;Thymelicus sylvestris;0.999940778442454;  
MN142247;Lepidoptera;Coenonympha pamphilus;Coenonympha pamphilus;1;Coenonympha pamphilus;0.99999999999545;  
MN142248;Lepidoptera;Lycaena tityrus;Lycaena tityrus;1;Lycaena tityrus;0.999991446088649;  
MN142250;Lepidoptera;Euphydryas aurinia;NA;0.31;Euphydryas aurinia;0.993387708761386;  
MN142253;Lepidoptera;Melitaea parthenoides;Melitaea parthenoides;1;Melitaea parthenoides;0.999998904055136;  
MN142255;Lepidoptera;Celastrina argiolus;Celastrina argiolus;1;Celastrina argiolus;0.999527385150531;  
MN142258;Lepidoptera;Araschnia levana;Araschnia levana;1;Araschnia levana;0.999999772187832;  
MN142259;Lepidoptera;Euphydryas intermedia;NA;NA;NA;0.99999999996973;  
MN142260;Lepidoptera;Maniola cecilia;Pyronia cecilia;1;Pyronia cecilia;1;  
MN142261;Lepidoptera;Lasiommata megera;Lasiommata megera;1;Lasiommata megera;0.999379144055441;  
MN142262;Lepidoptera;Apatura iris;Apatura iris;1;Apatura iris;0.999999999999972;  
MN142263;Lepidoptera;Nymphalis io;NA;0.48;Aglais io;0.810743656963036;  
MN142264;Lepidoptera;Aricia cramera;Aricia cramera;1;Aricia cramera;0.999990014848976;

MN142267;Lepidoptera;Coenonympha arcania;NA;0.001;NA;0.999999999999975;  
 MN142268;Lepidoptera;Coenonympha pamphilus;Coenonympha pamphilus;1;Coenonympha  
 pamphilus;0.9999999999999744;  
 MN142269;Lepidoptera;Maniola jurtina;NA;0.012;Maniola jurtina;0.91755716175482;  
 MN142270;Lepidoptera;Cupido argiades;NA;0.499;NA;0.999999999984682;  
 MN142272;Lepidoptera;Thymelicus sylvestris;Thymelicus sylvestris;1;Thymelicus  
 sylvestris;0.999999981568351;  
 MN142273;Lepidoptera;Erebia medusa;NA;0.009;Erebia medusa;0.986275612856827;  
 MN142274;Lepidoptera;Aporia crataegi;NA;0.004;Aporia crataegi;0.999998728360153;  
 MN142275;Lepidoptera;Anthocharis euphenoides;NA;0.066;Anthocharis euphenoides;0.963162702900425;  
 MN142276;Lepidoptera;Pyrgus onopordi;Pyrgus onopordi;1;Pyrgus onopordi;0.99999711229755;  
 MN142277;Lepidoptera;Carcharodus alceae;Carcharodus alceae;1;Carcharodus  
 alceae;0.99999998465938;  
 MN142278;Lepidoptera;Favonius quercus;Favonius quercus;1;Favonius quercus;0.997815274624199;  
 MN142280;Lepidoptera;Arethusana arethusana;Arethusana arethusana;0.05;Arethusana  
 arethusana;0.999951869987216;  
 MN142282;Lepidoptera;Agriades orbitulus;NA;0.01;Agriades orbitulus;0.998991302227708;  
 MN142283;Lepidoptera;Maniola jurtina;NA;NA;Maniola jurtina;0.890930381730166;  
 MN142284;Lepidoptera;Polyommatus icarus;NA;0.001;Polyommatus icarus;0.981285528541973;  
 MN142285;Lepidoptera;Melitaea didyma;NA;NA;Melitaea didyma;0.981993619455166;  
 MN142287;Lepidoptera;Brintesia circe;Brintesia circe;1;Brintesia circe;0.99999898349165;  
 MN142288;Lepidoptera;Ochlodes sylvanus;NA;0.316;Ochlodes sylvanus;0.996318754838625;  
 MN142289;Lepidoptera;Cupido alcetas;NA;0.218;Cupido alcetas;0.833501983138177;  
 MN142290;Lepidoptera;Lasiommata maera;Lasiommata maera;1;Lasiommata maera;0.999996552555305;  
 MN142291;Lepidoptera;Coenonympha pamphilus;Coenonympha pamphilus;1;Coenonympha  
 pamphilus;0.999999999999744;  
 MN142292;Lepidoptera;Heteropterus morpheus;NA;NA;Heteropterus morpheus;0.999999999999943;  
 MN142294;Lepidoptera;Coenonympha pamphilus;Coenonympha pamphilus;1;Coenonympha  
 pamphilus;0.999999999999744;  
 MN142295;Lepidoptera;Gonepteryx cleopatra;Gonepteryx cleopatra;0.998;Gonepteryx  
 cleopatra;0.999118636582266;  
 MN142296;Lepidoptera;Boloria titania;Boloria titania;0.999;Boloria titania;0.999431261609546;  
 MN142297;Lepidoptera;Polyommatus amandus;Polyommatus amandus;0.003;Polyommatus  
 amandus;0.999980071833264;  
 MN142298;Lepidoptera;Cupido minimus;NA;0.01;Cupido minimus;0.999822522018942;  
 MN142299;Lepidoptera;Chazara briseis;Chazara briseis;0.001;Chazara briseis;0.999989797071389;  
 MN142300;Lepidoptera;Satyrium ilicis;Satyrium ilicis;1;Satyrium ilicis;0.99999987901305;  
 MN142301;Lepidoptera;Maniola jurtina;NA;0.171;Maniola jurtina;0.963697912386445;  
 MN142302;Lepidoptera;Cupido minimus;NA;0.006;Cupido minimus;0.999768371759258;  
 MN142303;Lepidoptera;Pieris napi;NA;0.011;Pieris napi;0.801985394724814;  
 MN142304;Lepidoptera;Glaucopsyche melanops;Glaucopsyche melanops;1;Glaucopsyche  
 melanops;0.999952924254607;  
 MN142305;Lepidoptera;Satyrus ferula;Satyrus ferula;0.001;Satyrus ferula;0.992107254386621;  
 MN142306;Lepidoptera;Thymelicus acteon;Thymelicus acteon;1;Thymelicus acteon;0.9999999752248;  
 MN142307;Lepidoptera;Brintesia circe;Brintesia circe;1;Brintesia circe;0.99999898349165;  
 MN142308;Lepidoptera;Erebia pharte;Erebia pharte;1;Erebia pharte;0.9999999630495;  
 MN142309;Lepidoptera;Lampides boeticus;Lampides boeticus;1;Lampides boeticus;0.99999999545906;  
 MN142310;Lepidoptera;Aricia artaxerxes;NA;0.139;Aricia artaxerxes;0.999594219786776;  
 MN142311;Lepidoptera;Aglais urticae;NA;0.002;Aglais urticae;0.987497593219019;  
 MN142312;Lepidoptera;Maniola jurtina;NA;0.012;Maniola jurtina;0.91755716175482;  
 MN142313;Lepidoptera;Glaucopsyche alexis;NA;NA;Glaucopsyche alexis;0.89375645259355;  
 MN142315;Lepidoptera;Gegenes nostrodamus;Gegenes nostrodamus;1;Gegenes  
 nostrodamus;0.999999995063121;  
 MN142319;Lepidoptera;Maniola jurtina;NA;0.001;Maniola jurtina;0.939220105860875;  
 MN142320;Lepidoptera;Lycaena phlaeas;Lycaena phlaeas;1;Lycaena phlaeas;0.99999996363186;  
 MN142321;Lepidoptera;Coenonympha gardetta;NA;0.001;NA;0.999999999999975;  
 MN142322;Lepidoptera;Coenonympha pamphilus;Coenonympha pamphilus;1;Coenonympha  
 pamphilus;0.999999999999744;  
 MN142323;Lepidoptera;Polyommatus icarus;NA;0.002;Polyommatus icarus;0.997871588783533;  
 MN142326;Lepidoptera;Carcharodus alceae;Carcharodus alceae;1;Carcharodus  
 alceae;0.99999998465938;  
 MN142329;Lepidoptera;Maniola cecilia;Pyronia cecilia;1;Pyronia cecilia;1;  
 MN142331;Lepidoptera;Nymphalis io;NA;0.491;Aglais io;0.930153237246992;  
 MN142332;Lepidoptera;Pieris napi;NA;0.028;Pieris napi;0.888205720664699;  
 MN142335;Lepidoptera;Cupido alcetas;NA;0.218;Cupido alcetas;0.833501983138177;  
 MN142338;Lepidoptera;Aricia artaxerxes;NA;0.001;Aricia artaxerxes;0.998546425606378;  
 MN142339;Lepidoptera;Euphydryas aurinia;NA;0.001;Euphydryas aurinia;0.995576749826865;  
 MN142340;Lepidoptera;Helleia helle;Lycaena helle;1;Lycaena helle;0.99999967866899;  
 MN142343;Lepidoptera;Maniola jurtina;NA;0.012;Maniola jurtina;0.91755716175482;  
 MN142344;Lepidoptera;Pyrgus onopordi;Pyrgus onopordi;1;Pyrgus onopordi;0.99999711229755;  
 MN142346;Lepidoptera;Coenonympha pamphilus;Coenonympha pamphilus;1;Coenonympha  
 pamphilus;0.9999999999999034;  
 MN142347;Lepidoptera;Aglais urticae;NA;0.002;Aglais urticae;0.987497593219019;  
 MN142348;Lepidoptera;Polyommatus damon;Polyommatus damon;1;Polyommatus damon;0.99999970925785;  
 MN142349;Lepidoptera;Papilio machaon;Papilio machaon;0.003;Papilio machaon;0.997288237409893;  
 MN142350;Lepidoptera;Polyommatus eros;NA;0.005;Polyommatus eros;0.95275169203039;  
 MN142351;Lepidoptera;Erebia pronoe;Erebia pronoe;0.001;Erebia pronoe;0.999787522727637;  
 MN142352;Lepidoptera;Melitaea cinxia;Melitaea cinxia;1;Melitaea cinxia;0.999999999999176;

MN142354;Lepidoptera;Boloria titania;Boloria titania;0.001;Boloria titania;0.99983358374111;  
MN142355;Lepidoptera;Pieris napi;NA;0.066;Pieris napi;0.832895481558215;  
MN142356;Lepidoptera;Aricia cramera;Aricia cramera;1;Aricia cramera;0.999993731037033;  
MN142357;Lepidoptera;Hipparchia hermione;Hipparchia hermione;NA;NA;0.999999999999972;  
MN142358;Lepidoptera;Lasiommata megera;Lasiommata megera;1;Lasiommata megera;0.999379144055441;  
MN142360;Lepidoptera;Ochlodes sylvanus;NA;NA;Ochlodes sylvanus;0.996120374559178;  
MN142363;Lepidoptera;Pyrgus armoricanus;Pyrgus armoricanus;1;Pyrgus armoricanus;0.999998257687406;  
MN142364;Lepidoptera;Lysandra coridon;NA;NA;Lysandra coridon;0.811340269227995;  
MN142365;Lepidoptera;Fabriciana adippe;Fabriciana adippe;1;Fabriciana adippe;0.99283006317624;  
MN142366;Lepidoptera;Polyommatus icarus;Polyommatus icarus;0.001;Polyommatus icarus;0.999851522482238;  
MN142367;Lepidoptera;Pyrgus carthami;Pyrgus carthami;1;Pyrgus carthami;0.999990719819382;  
MN142368;Lepidoptera;Glaucopsyche alexis;Glaucopsyche alexis;0.001;Glaucopsyche alexis;0.94042380088325;  
MN142370;Lepidoptera;Lysandra coridon;Lysandra coridon;NA;NA;0.999039865644651;  
MN142371;Lepidoptera;Erebia epiphron;NA;NA;Erebia epiphron;0.994401488812176;  
MN142373;Lepidoptera;Thymelicus lineola;Thymelicus lineola;1;Thymelicus lineola;0.999971535093703;  
MN142374;Lepidoptera;Melitaea didyma;Melitaea didyma;1;Melitaea didyma;0.999945824175549;  
MN142376;Lepidoptera;Colias crocea;NA;0.059;NA;0.999999999999738;  
MN142377;Lepidoptera;Maniola jurtina;NA;0.174;Maniola jurtina;0.716224233181708;  
MN142378;Lepidoptera;Favonius quercus;NA;NA;Favonius quercus;0.802522320134796;  
MN142379;Lepidoptera;Polyommatus icarus;NA;0.007;Polyommatus icarus;0.999081737461227;  
MN142380;Lepidoptera;Maniola jurtina;NA;0.061;Maniola jurtina;0.984597681671194;  
MN142381;Lepidoptera;Limenitis camilla;Limenitis camilla;0.009;Limenitis camilla;0.9999828626808;  
MN142383;Lepidoptera;Lycaena tityrus;Lycaena tityrus;1;Lycaena tityrus;0.999995729087172;  
MN142385;Lepidoptera;Hamearis lucina;NA;NA;Hamearis lucina;0.999999999984141;  
MN142386;Lepidoptera;Hipparchia fagi;NA;NA;Hipparchia fagi;0.93698925414046;  
MN142388;Lepidoptera;Erebia pharte;Erebia pharte;1;Erebia pharte;0.99999999630495;  
MN142389;Lepidoptera;Polyommatus icarus;NA;0.001;Polyommatus icarus;0.951224930796043;  
MN142391;Lepidoptera;Maniola jurtina;NA;0.001;Maniola jurtina;0.939220105860875;  
MN142392;Lepidoptera;Favonius quercus;NA;NA;Favonius quercus;0.73046069582187;  
MN142393;Lepidoptera;Favonius quercus;NA;NA;Favonius quercus;0.73046069582187;  
MN142395;Lepidoptera;Maniola jurtina;NA;0.012;Maniola jurtina;0.91755716175482;  
MN142396;Lepidoptera;Nymphalis c-album;NA;0.215;NA;0.999999192918557;  
MN142399;Lepidoptera;Aricia agestis;NA;0.253;Aricia agestis;0.996350017387504;  
MN142400;Lepidoptera;Colias hyale;Colias hyale;0.015;Colias hyale;0.999997884296128;  
MN142401;Lepidoptera;Anthocharis cardamines;Anthocharis cardamines;1;Anthocharis cardamines;0.9999997953563;  
MN142402;Lepidoptera;Erebia neoridas;NA;NA;Erebia neoridas;0.99731844101466;  
MN142403;Lepidoptera;Lasiommata paramegaera;Lasiommata paramegaera;0.999;Lasiommata paramegaera;0.995283446287531;  
MN142404;Lepidoptera;Pieris napi;NA;0.028;Pieris napi;0.888205720664699;  
MN142405;Lepidoptera;Coenonympha pamphilus;Coenonympha pamphilus;1;Coenonympha pamphilus;0.999999999999744;  
MN142406;Lepidoptera;Heteropterus morpheus;NA;NA;Heteropterus morpheus;0.999999999999829;  
MN142407;Lepidoptera;Melitaea cinxia;Melitaea cinxia;1;Melitaea cinxia;0.999999999999773;  
MN142408;Lepidoptera;Polyommatus celina;Polyommatus celina;0.999;Polyommatus celina;0.99999998437687;  
MN142409;Lepidoptera;Heteropterus morpheus;NA;NA;Heteropterus morpheus;0.999999999999801;  
MN142410;Lepidoptera;Aglaia urticae;NA;0.002;Aglaia urticae;0.987497593219019;  
MN142411;Lepidoptera;Maniola jurtina;NA;0.001;Maniola jurtina;0.939220105860875;  
MN142412;Lepidoptera;Pieris napi;NA;0.028;Pieris napi;0.888205720664699;  
MN142414;Lepidoptera;Anthocharis cardamines;Anthocharis cardamines;1;Anthocharis cardamines;0.99999940675226;  
MN142415;Lepidoptera;Coenonympha pamphilus;Coenonympha pamphilus;1;Coenonympha pamphilus;0.999999999999744;  
MN142416;Lepidoptera;Melitaea varia;Melitaea varia;1;Melitaea varia;0.99999911499176;  
MN142417;Lepidoptera;Polyommatus dolus;Polyommatus dolus;0.001;Polyommatus dolus;0.94885025479423;  
MN142418;Lepidoptera;Aricia agestis;NA;0.067;Aricia agestis;0.999509743227786;  
MN142419;Lepidoptera;Thymelicus sylvestris;NA;0.324;Thymelicus sylvestris;0.999940778442454;  
MN142420;Lepidoptera;Maniola jurtina;NA;0.171;Maniola jurtina;0.963697912386445;  
MN142421;Lepidoptera;Lysandra coridon;NA;NA;NA;0.998017994491822;  
MN142422;Lepidoptera;Polyommatus humedasa;Polyommatus humedasa;1;Polyommatus humedasa;0.997627527054125;  
MN142423;Lepidoptera;Polyommatus celina;Polyommatus celina;1;Polyommatus celina;0.999999999674685;  
MN142424;Lepidoptera;Pyrgus malvoides;NA;0.2;Pyrgus malvoides;0.91582520613586;  
MN142425;Lepidoptera;Aricia eumedon;Eumedonia eumedon;0.002;Eumedonia eumedon;0.998285932369328;  
MN142427;Lepidoptera;Cyaniris semiargus;Cyaniris semiargus;NA;Cyaniris semiargus;0.999795734354061;  
MN142428;Lepidoptera;Pieris napi;NA;0.066;Pieris napi;0.832895481558215;  
MN142429;Lepidoptera;Euphydryas intermedia;NA;NA;NA;0.999999999996973;  
MN142430;Lepidoptera;Maniola jurtina;NA;0.02;NA;0.999999999999284;  
MN142431;Lepidoptera;Thymelicus acteon;Thymelicus acteon;1;Thymelicus acteon;0.99999999752248;

MN142432;Lepidoptera;Parnassius apollo;Parnassius apollo;1;Parnassius apollo;0.993430676891864;  
MN142433;Lepidoptera;Pieris napi;NA;NA;Pieris napi;0.852210940941117;  
MN142434;Lepidoptera;Plebejus argus;NA;0.118;Plebejus argus;0.977297982426809;  
MN142435;Lepidoptera;Colias crocea;NA;0.059;NA;0.99999999999738;  
MN142436;Lepidoptera;Brenthis ino;Brenthis ino;1;Brenthis ino;0.995903086085865;  
MN142437;Lepidoptera;Celastrina argiolus;Celastrina argiolus;1;Celastrina  
argiolus;0.999643218809658;  
MN142438;Lepidoptera;Ochlodes sylvanus;NA;0.316;Ochlodes sylvanus;0.996318754838625;  
MN142440;Lepidoptera;Coenonympha rhodopensis;Coenonympha rhodopensis;0.001;Coenonympha  
rhodopensis;0.953917004161499;  
MN142441;Lepidoptera;Fabriciana niobe;NA;0.005;Fabriciana niobe;0.992125835358755;  
MN142442;Lepidoptera;Argynnis aglaja;NA;NA;Speyeria aglaja;0.872991147917853;  
MN142443;Lepidoptera;Plebejus argus;NA;0.048;Plebejus argus;0.968579087403608;  
MN142445;Lepidoptera;Lycaena tityrus;Lycaena tityrus;1;Lycaena tityrus;0.999998928238034;  
MN142447;Lepidoptera;Erebia meolans;NA;NA;Erebia meolans;0.999558897580846;  
MN142448;Lepidoptera;Carterocephalus palaemon;NA;0.045;Carterocephalus  
palaemon;0.721162712827735;  
MN142449;Lepidoptera;Lasiommata megera;Lasiommata megera;1;Lasiommata megera;0.999928528239676;  
MN142450;Lepidoptera;Polyommatus daphnis;Polyommatus daphnis;1;Polyommatus  
daphnis;0.999931785512501;  
MN142451;Lepidoptera;Erebia meolans;Erebia meolans;NA;Erebia meolans;0.999811139221891;  
MN142453;Lepidoptera;Lysandra coridon;NA;NA;NA;0.999932749495281;  
MN142454;Lepidoptera;Melitaea diamina;NA;0.149;Melitaea diamina;0.99999996592464;  
MN142455;Lepidoptera;Polyommatus celina;Polyommatus celina;0.001;Polyommatus  
celina;0.99999999717033;  
MN142456;Lepidoptera;Nymphalis io;NA;0.187;Aglais io;0.964697677597692;  
MN142458;Lepidoptera;Thymelicus lineola;Thymelicus lineola;1;Thymelicus  
lineola;0.999971535093703;  
MN142459;Lepidoptera;Euphydryas cynthia;Euphydryas cynthia;1;Euphydryas  
cynthia;0.999998812102883;  
MN142462;Lepidoptera;Papilio machaon;Papilio machaon;0.003;Papilio machaon;0.99836194854697;  
MN142463;Lepidoptera;Aricia artaxerxes;Plebejus argus;1;Aricia artaxerxes;0.999743187199922;  
MN142464;Lepidoptera;Polyommatus thersites;Polyommatus thersites;0.999;Polyommatus  
thersites;0.999999917759627;  
MN142465;Lepidoptera;Satyrium spini;Satyrium spini;1;Satyrium spini;0.99999839319271;  
MN142466;Lepidoptera;Maniola tithonus;Pyronia tithonus;1;Pyronia tithonus;1;  
MN142467;Lepidoptera;Hipparchia hermione;NA;NA;NA;0.99999999999991;  
MN142468;Lepidoptera;Glaucopsyche melanops;Glaucopsyche melanops;1;Glaucopsyche  
melanops;0.999969667971717;  
MN142469;Lepidoptera;Aglais urticae;NA;0.002;Aglais urticae;0.987497593219019;  
MN142470;Lepidoptera;Boloria euphrosyne;Boloria euphrosyne;1;Boloria  
euphrosyne;0.99999888858929;  
MN142471;Lepidoptera;Cupido osiris;Cupido osiris;1;Cupido osiris;0.99999967617364;  
MN142472;Lepidoptera;Hipparchia neapolitana;NA;0.001;Hipparchia semele;0.813158788404945;  
MN142473;Lepidoptera;Nymphalis egea;Polygonia egea;1;Polygonia egea;0.99999878357791;  
MN142474;Lepidoptera;Iolana iolas;Iolana iolas;1;Iolana iolas;0.999998642388204;  
MN142475;Lepidoptera;Glaucopsyche melanops;Glaucopsyche melanops;1;Glaucopsyche  
melanops;0.999952924254607;  
MN142476;Lepidoptera;Thecla betulae;Thecla betulae;1;Thecla betulae;0.99999999971322;  
MN142477;Lepidoptera;Aricia agestis;NA;0.253;Aricia agestis;0.996350017387504;  
MN142478;Lepidoptera;Gonepteryx rhamni;NA;0.474;Gonepteryx rhamni;0.982076396127858;  
MN142480;Lepidoptera;Cupido minimus;NA;0.006;Cupido minimus;0.999768371759258;  
MN142481;Lepidoptera;Pyrgus armoricanus;Pyrgus armoricanus;1;Pyrgus  
armoricanus;0.999997353848817;  
MN142482;Lepidoptera;Maniola jurtina;NA;0.171;Maniola jurtina;0.963697912386445;  
MN142483;Lepidoptera;Melitaea didyma;Melitaea didyma;1;Melitaea didyma;0.999768602965124;  
MN142484;Lepidoptera;Ochlodes sylvanus;NA;0.316;Ochlodes sylvanus;0.996318754838625;  
MN142487;Lepidoptera;Colias crocea;NA;0.059;NA;0.999999999999738;  
MN142488;Lepidoptera;Aricia agestis;NA;0.253;Aricia agestis;0.996350017387504;  
MN142490;Lepidoptera;Lasiommata maera;Lasiommata maera;1;Lasiommata maera;0.99999510792253;  
MN142491;Lepidoptera;Maniola jurtina;NA;0.012;Maniola jurtina;0.91755716175482;  
MN142493;Lepidoptera;Issoria lathonia;Issoria lathonia;1;Issoria lathonia;0.99999999989257;  
MN142494;Lepidoptera;Plebejus argus;NA;NA;Plebejus argus;0.968724269083964;  
MN142495;Lepidoptera;Polyommatus icarus;NA;0.003;Polyommatus icarus;0.998348220031726;  
MN142497;Lepidoptera;Melitaea didyma;Melitaea didyma;1;Melitaea didyma;0.999645811544966;  
MN142499;Lepidoptera;Callophrys rubi;NA;0.019;Callophrys rubi;0.998201459637982;  
MN142501;Lepidoptera;Hipparchia fagi;Hipparchia fagi;NA;Hipparchia fagi;0.986566456150817;  
MN142502;Lepidoptera;Brintesia circe;Brintesia circe;1;Brintesia circe;0.9999951254154;  
MN142503;Lepidoptera;Coenonympha pamphilus;Coenonympha pamphilus;1;Coenonympha  
pamphilus;0.99999999999744;  
MN142504;Lepidoptera;Anthocharis cardamines;Anthocharis cardamines;1;Anthocharis  
cardamines;0.99999997953563;  
MN142506;Lepidoptera;Pieris napi;NA;0.011;Pieris napi;0.801985394724814;  
MN142511;Lepidoptera;Maniola jurtina;NA;0.038;NA;0.99999999999524;  
MN142512;Lepidoptera;Pyrgus malvoides;NA;0.176;Pyrgus malvoides;0.940490890379026;  
MN142514;Lepidoptera;Hipparchia hermione;NA;NA;NA;0.99999999999991;  
MN142515;Lepidoptera;Colias crocea;NA;NA;NA;0.99999999998415;

MN142516;Lepidoptera;Coenonympha pamphilus;Coenonympha pamphilus;1;Coenonympha  
pamphilus;0.99999999999744;  
MN142518;Lepidoptera;Melitaea cinxia;Melitaea cinxia;1;Melitaea cinxia;0.99999999999801;  
MN142519;Lepidoptera;Maniola jurtina;NA;0.012;Maniola jurtina;0.91755716175482;  
MN142521;Lepidoptera;Erebia melampus;Erebia melampus;NA;Erebia melampus;0.974275931838478;  
MN142522;Lepidoptera;Pyrgus malvoides;NA;0.176;Pyrgus malvoides;0.940490890379026;  
MN142523;Lepidoptera;Issoria lathonia;Issoria lathonia;1;Issoria lathonia;0.999999999989257;  
MN142524;Lepidoptera;Erebia pharte;Erebia pharte;1;Erebia pharte;0.999999994323019;  
MN142525;Lepidoptera;Plebejus idas;NA;0.007;NA;0.999546324331549;  
MN142527;Lepidoptera;Thymelicus lineola;Thymelicus lineola;1;Thymelicus  
lineola;0.999971535093703;  
MN142528;Lepidoptera;Hipparchia semele;NA;NA;Hipparchia semele;0.748345401572611;  
MN142530;Lepidoptera;Euphydryas cynthia;Euphydryas cynthia;1;Euphydryas  
cynthia;0.99999999744034;  
MN142531;Lepidoptera;Lasiommata maera;Lasiommata maera;1;Lasiommata maera;0.99999510792253;  
MN142532;Lepidoptera;Gonepteryx rhamni;Gonepteryx rhamni;1;Gonepteryx rhamni;0.999673119534565;  
MN142533;Lepidoptera;Aphantopus hyperantus;Aphantopus hyperantus;0.991;Aphantopus  
hyperantus;0.999999065786607;  
MN142535;Lepidoptera;Colias crocea;NA;0.059;NA;0.99999999999738;  
MN142537;Lepidoptera;Carcharodus alceae;Carcharodus alceae;0.999;Carcharodus  
alceae;0.99999998008462;  
MN142538;Lepidoptera;Pieris napi;NA;0.028;Pieris napi;0.888205720664699;  
MN142539;Lepidoptera;Polyommatus icarus;Polyommatus icarus;0.001;Polyommatus  
icarus;0.999762262298252;  
MN142541;Lepidoptera;Boloria euphrosyne;Boloria euphrosyne;1;Boloria  
euphrosyne;0.999986754946242;  
MN142542;Lepidoptera;Minois dryas;NA;0.025;Minois dryas;0.850746026247397;  
MN142543;Lepidoptera;Polyommatus eros;NA;0.005;Polyommatus eros;0.987133739818637;  
MN142544;Lepidoptera;Pyrgus malvoides;NA;0.155;Pyrgus malvoides;0.93878678048139;  
MN142545;Lepidoptera;Melitaea didyma;Melitaea didyma;1;Melitaea didyma;0.995729075061249;  
MN142547;Lepidoptera;Vanessa atalanta;Vanessa atalanta;1;Vanessa atalanta;0.99999999592376;  
MN142548;Lepidoptera;Lycaena phlaeas;Lycaena phlaeas;1;Lycaena phlaeas;0.999999996363186;  
MN142550;Lepidoptera;Colias crocea;NA;0.059;NA;0.99999999999738;  
MN142552;Lepidoptera;Pieris napi;NA;0.028;Pieris napi;0.888205720664699;  
MN142553;Lepidoptera;Pyrgus armoricanus;Pyrgus armoricanus;1;Pyrgus  
armoricanus;0.999914079595002;  
MN142554;Lepidoptera;Thymelicus acteon;Thymelicus acteon;1;Thymelicus acteon;0.99999999752248;  
MN142555;Lepidoptera;Fabriciana niobe;NA;0.005;Fabriciana niobe;0.992125835358755;  
MN142556;Lepidoptera;Lasiommata megera;Lasiommata megera;1;Lasiommata megera;0.999928528239676;  
MN142557;Lepidoptera;Coenonympha glycerion;NA;0.28;Coenonympha glycerion;0.999998036263913;  
MN142558;Lepidoptera;Maniola jurtina;NA;0.001;Maniola jurtina;0.939220105860875;  
MN142559;Lepidoptera;Melitaea cinxia;Melitaea cinxia;1;Melitaea cinxia;0.99999999999631;  
MN142560;Lepidoptera;Parnassius apollo;Parnassius apollo;NA;Parnassius apollo;0.975299134495568;  
MN142561;Lepidoptera;Polyommatus dorylas;NA;0.007;Polyommatus dorylas;0.919115237970453;  
MN142562;Lepidoptera;Pyrgus malvoides;NA;0.076;Pyrgus malvoides;0.887854315566122;  
MN142565;Lepidoptera;Aporia crataegi;NA;NA;Aporia crataegi;0.999996781126733;  
MN142567;Lepidoptera;Maniola jurtina;NA;0.001;Maniola jurtina;0.939220105860875;  
MN142569;Lepidoptera;Lycaena phlaeas;Lycaena phlaeas;1;Lycaena phlaeas;0.999999996363186;  
MN142570;Lepidoptera;Favonius quercus;Favonius quercus;NA;Favonius quercus;0.858009515981131;  
MN142571;Lepidoptera;Pieris napi;NA;0.011;Pieris napi;0.801985394724814;  
MN142572;Lepidoptera;Coenonympha pamphilus;Coenonympha pamphilus;1;Coenonympha  
pamphilus;0.999999999999886;  
MN142573;Lepidoptera;Erebia euryale;NA;NA;Erebia euryale;0.985600540820829;  
MN142575;Lepidoptera;Erebia euryale;NA;NA;Erebia euryale;0.919518760623792;  
MN142577;Lepidoptera;Pyrgus malvoides;NA;0.052;Pyrgus malvoides;0.943208768333892;  
MN142578;Lepidoptera;Pieris napi;NA;0.037;Pieris napi;0.914285087538953;  
MN142579;Lepidoptera;Polyommatus icarus;NA;0.003;Polyommatus icarus;0.998348220031726;  
MN142581;Lepidoptera;Maniola jurtina;NA;0.012;Maniola jurtina;0.91755716175482;  
MN142582;Lepidoptera;Thymelicus sylvestris;Thymelicus sylvestris;1;Thymelicus  
sylvestris;0.999999985935205;  
MN142583;Lepidoptera;Lycaena alciphron;Lycaena alciphron;1;Lycaena alciphron;0.999999925232376;  
MN142584;Lepidoptera;Aricia artaxerxes;NA;0.394;Aricia artaxerxes;0.999502890976379;  
MN142585;Lepidoptera;Cupido minimus;NA;0.006;Cupido minimus;0.999768371759258;  
MN142587;Lepidoptera;Agriades optilete;Agriades optilete;1;Agriades optilete;0.9999999864568;  
MN142590;Lepidoptera;Melitaea varia;Melitaea varia;1;Melitaea varia;0.999979061065409;  
MN142591;Lepidoptera;Thymelicus lineola;Thymelicus lineola;1;Thymelicus  
lineola;0.99995927238524;  
MN142592;Lepidoptera;Melitaea didyma;Melitaea didyma;1;Melitaea didyma;0.993581424852097;  
MN142593;Lepidoptera;Aphantopus hyperantus;Aphantopus hyperantus;1;Aphantopus  
hyperantus;0.999995673187026;  
MN142597;Lepidoptera;Aphantopus hyperantus;Aphantopus hyperantus;0.006;Aphantopus  
hyperantus;0.999998615504572;  
MN142598;Lepidoptera;Hipparchia hermione;NA;NA;NA;0.99999999999991;  
MN142600;Lepidoptera;Apatura iris;Apatura iris;1;Apatura iris;0.999999999999972;  
MN142602;Lepidoptera;Maniola jurtina;NA;0.166;NA;0.99999999999931;  
MN142604;Lepidoptera;Pieris napi;NA;0.011;Pieris napi;0.801985394724814;  
MN142605;Lepidoptera;Coenonympha arcania;NA;0.002;NA;0.999999999999972;  
MN142606;Lepidoptera;Lasiommata maera;Lasiommata maera;1;Lasiommata maera;0.999996552555305;



MN142607;Lepidoptera;Satyrium w-album;NA;0.056;Satyrium w-album;0.989378230996316;  
MN142608;Lepidoptera;Cupido minimus;NA;0.025;Cupido minimus;0.999842613067288;  
MN142609;Lepidoptera;Lasiommata megera;Lasiommata megera;1;Lasiommata megera;0.999945664728349;  
MN142610;Lepidoptera;Glaucopsyche alexis;Glaucopsyche alexis;0.001;Glaucopsyche alexis;0.94042380088325;  
MN142611;Lepidoptera;Erebia cassioides;NA;NA;NA;0.999999999999901;  
MN142612;Lepidoptera;Anthocharis cardamines;Anthocharis cardamines;1;Anthocharis cardamines;0.99999997953563;  
MN142613;Lepidoptera;Brintesia circe;Brintesia circe;NA;Brintesia circe;0.999999813082031;  
MN142614;Lepidoptera;Melitaea didyma;Melitaea didyma;1;Melitaea didyma;0.999693840375346;  
MN142615;Lepidoptera;Melitaea didyma;Melitaea didyma;1;Melitaea didyma;0.999890900891508;  
MN142617;Lepidoptera;Glaucopsyche alexis;Glaucopsyche alexis;0.001;Glaucopsyche alexis;0.94042380088325;  
MN142619;Lepidoptera;Maniola jurtina;NA;NA;Maniola jurtina;0.961551247075407;  
MN142620;Lepidoptera;Carcharodus alceae;Carcharodus alceae;0.003;Carcharodus alceae;0.999999959808407;  
MN142621;Lepidoptera;Lasiommata megera;Lasiommata megera;1;Lasiommata megera;0.999379144055441;  
MN142622;Lepidoptera;Lasiommata maera;Lasiommata maera;1;Lasiommata maera;0.99999510792253;  
MN142623;Lepidoptera;Gegenes nostrodamus;Gegenes nostrodamus;1;Gegenes nostrodamus;0.999999998749928;  
MN142625;Lepidoptera;Erebia neoridas;Erebia neoridas;NA;Erebia neoridas;0.998396871425044;  
MN142627;Lepidoptera;Fabriciana niobe;Fabriciana niobe;0.001;Fabriciana niobe;0.93186202957215;  
MN142630;Lepidoptera;Fabriciana niobe;NA;0.006;Fabriciana niobe;0.989549554585342;  
MN142631;Lepidoptera;Plebejus argus;Plebejus argus;0.004;Plebejus argus;0.989715396991954;  
MN142632;Lepidoptera;Maniola jurtina;NA;0.035;Maniola jurtina;0.923116873545229;  
MN142633;Lepidoptera;Favonius quercus;Favonius quercus;NA;Favonius quercus;0.766827663940491;  
MN142634;Lepidoptera;Maniola tithonus;Pyronia tithonus;1;Pyronia tithonus;1;  
MN142635;Lepidoptera;Pyrgus carthami;Pyrgus carthami;1;Pyrgus carthami;0.999998492171898;  
MN142638;Lepidoptera;Polyommatus eros;NA;0.005;Polyommatus eros;0.95275169203039;  
MN142639;Lepidoptera;Pyrgus sidae;Pyrgus sidae;1;Pyrgus sidae;0.999994277634217;  
MN142641;Lepidoptera;Plebejus idas;NA;0.007;NA;0.999546324331549;  
MN142642;Lepidoptera;Maniola jurtina;NA;0.001;Maniola jurtina;0.939220105860875;  
MN142645;Lepidoptera;Carterocephalus palaemon;NA;0.052;Carterocephalus palaemon;0.728445051795325;  
MN142646;Lepidoptera;Aricia eumedon;Eumedonia eumedon;1;Eumedonia eumedon;0.998602192664416;  
MN142647;Lepidoptera;Pieris napi;NA;NA;Pieris napi;0.923653340877371;  
MN142648;Lepidoptera;Lasiommata megera;Lasiommata megera;1;Lasiommata megera;0.999379144055441;  
MN142649;Lepidoptera;Polyommatus icarus;NA;0.003;Polyommatus icarus;0.986125651677522;  
MN142650;Lepidoptera;Cupido alcetas;NA;0.218;Cupido alcetas;0.833501983138177;  
MN142651;Lepidoptera;Argynnis aglaja;NA;0.002;Speyeria aglaja;0.87239079736947;  
MN142652;Lepidoptera;Parnassius apollo;Parnassius apollo;1;Parnassius apollo;0.992704703916692;  
MN142653;Lepidoptera;Polyommatus thersites;Polyommatus thersites;0.001;Polyommatus thersites;0.999999937179697;  
MN142654;Lepidoptera;Polyommatus icarus;NA;0.166;Polyommatus icarus;0.749935576218847;  
MN142656;Lepidoptera;Maniola jurtina;NA;0.012;Maniola jurtina;0.91755716175482;  
MN142657;Lepidoptera;Boloria euphrosyne;Boloria euphrosyne;1;Boloria euphrosyne;0.999999700428037;  
MN142658;Lepidoptera;Lycaena phlaeas;Lycaena phlaeas;1;Lycaena phlaeas;0.999999996363186;  
MN142659;Lepidoptera;Aricia cramera;Aricia cramera;1;Aricia cramera;0.999993731037033;  
MN142660;Lepidoptera;Cercyonis lupina;Hyponphele lupina;1;Hyponphele lupina;0.999999936255877;  
MN142661;Lepidoptera;Aricia agestis;NA;0.069;Aricia agestis;0.995918114091591;  
MN142662;Lepidoptera;Erebia cassioides;NA;NA;NA;0.999999999999901;  
MN142663;Lepidoptera;Celastrina argiolus;Celastrina argiolus;0.997;Celastrina argiolus;0.998455976832561;  
MN142665;Lepidoptera;Thecla betulae;Thecla betulae;1;Thecla betulae;0.99999999972886;  
MN142666;Lepidoptera;Polyommatus icarus;Polyommatus icarus;0.001;Polyommatus icarus;0.999851522482238;  
MN142667;Lepidoptera;Lampides boeticus;Lampides boeticus;1;Lampides boeticus;0.999999999545906;  
MN142669;Lepidoptera;Melitaea cinxia;Melitaea cinxia;1;Melitaea cinxia;0.99999999999773;  
MN142670;Lepidoptera;Maniola jurtina;NA;0.038;NA;0.999999999999524;  
MN142671;Lepidoptera;Maniola jurtina;NA;0.012;Maniola jurtina;0.91755716175482;  
MN142672;Lepidoptera;Coenonympha glycerion;NA;0.162;Coenonympha glycerion;0.999998417345156;  
MN142673;Lepidoptera;Melitaea didyma;Melitaea didyma;1;Melitaea didyma;0.999917338126345;  
MN142674;Lepidoptera;Polyommatus escheri;Polyommatus escheri;1;Polyommatus escheri;0.999999995127951;  
MN142675;Lepidoptera;Pieris napi;NA;0.028;Pieris napi;0.888205720664699;  
MN142678;Lepidoptera;Melitaea nevadensis;NA;0.002;Melitaea celadussa;0.863488126027305;  
MN142680;Lepidoptera;Satyrium w-album;NA;0.056;Satyrium w-album;0.989378230996316;  
MN142681;Lepidoptera;Fabriciana adippe;NA;NA;Fabriciana adippe;0.907696205558758;  
MN142685;Lepidoptera;Nymphalis c-album;NA;0.215;NA;0.999999192918557;  
MN142686;Lepidoptera;Pyrgus serratulae;Pyrgus serratulae;1;Pyrgus serratulae;0.999999565674736;  
MN142688;Lepidoptera;Coenonympha pamphilus;Coenonympha pamphilus;1;Coenonympha pamphilus;0.99999999999744;  
MN142690;Lepidoptera;Maniola jurtina;NA;0.157;Maniola jurtina;0.72935823378201;  
MN142691;Lepidoptera;Thymelicus acteon;Thymelicus acteon;1;Thymelicus acteon;0.9999999752248;  
MN142692;Lepidoptera;Vanessa cardui;Vanessa cardui;1;Vanessa cardui;0.999999459983318;  
MN142693;Lepidoptera;Aricia cramera;Aricia cramera;1;Aricia cramera;0.999993731037033;  
MN142694;Lepidoptera;Boloria titania;Boloria titania;0.001;Boloria titania;0.99983358374111;

MN142695;Lepidoptera;Ochlodes sylvanus;NA;0.316;Ochlodes sylvanus;0.996318754838625;  
MN142697;Lepidoptera;Hipparchia fagi;Hipparchia fagi;NA;Hipparchia fagi;0.986566456150817;  
MN142698;Lepidoptera;Maniola jurtina;NA;0.063;Maniola jurtina;0.972779934096133;  
MN142699;Lepidoptera;Pieris napi;NA;0.013;Pieris napi;0.827930168201203;  
MN142700;Lepidoptera;Pyrgus malvoides;NA;0.176;Pyrgus malvoides;0.940490890379026;  
MN142701;Lepidoptera;Pyrgus andromedae;Pyrgus andromedae;0.001;Pyrgus  
andromedae;0.997448239493065;  
MN142702;Lepidoptera;Maniola jurtina;NA;0.038;NA;0.999999999999524;  
MN142704;Lepidoptera;Brintesia circe;Brintesia circe;1;Brintesia circe;0.99999946877483;  
MN142705;Lepidoptera;Lysandra coridon;NA;NA;NA;0.998070184737648;  
MN142706;Lepidoptera;Pyrgus sidae;Pyrgus sidae;1;Pyrgus sidae;0.999994162588662;  
MN142707;Lepidoptera;Aricia agestis;NA;0.253;Aricia agestis;0.996350017387504;  
MN142709;Lepidoptera;Boloria titania;Boloria titania;0.001;Boloria titania;0.99983358374111;  
MN142711;Lepidoptera;Satyrus ferula;Satyrus ferula;0.001;Satyrus ferula;0.992107254386621;  
MN142712;Lepidoptera;Maniola cecilia;Pyronia cecilia;1;Pyronia cecilia;0.999999999999972;  
MN142713;Lepidoptera;Aricia cramera;Aricia cramera;1;Aricia cramera;0.99999662374882;  
MN142714;Lepidoptera;Favonius quercus;NA;NA;Favonius quercus;0.73046069582187;  
MN142715;Lepidoptera;Heteropterus morpheus;NA;NA;Heteropterus morpheus;0.999999999999943;  
MN142716;Lepidoptera;Brenthis daphne;Brenthis daphne;0.011;Brenthis daphne;0.986060795584964;  
MN142717;Lepidoptera;Nymphalis egea;Polygonia egea;1;Polygonia egea;0.99999758078475;  
MN142718;Lepidoptera;Maniola jurtina;NA;0.012;Maniola jurtina;0.91755716175482;  
MN142721;Lepidoptera;Erebia melampus;Erebia melampus;NA;Erebia melampus;0.961470496482581;  
MN142724;Lepidoptera;Satyrium ilicis;Satyrium ilicis;1;Satyrium ilicis;0.999999979753369;  
MN142725;Lepidoptera;Pieris napi;NA;0.011;Pieris napi;0.801985394724814;  
MN142726;Lepidoptera;Aricia agestis;NA;0.253;Aricia agestis;0.996350017387504;  
MN142728;Lepidoptera;Coenonympha pamphilus;Coenonympha pamphilus;1;Coenonympha  
pamphilus;0.9999999999999744;  
MN142729;Lepidoptera;Fabriciana adippe;Fabriciana adippe;0.002;Fabriciana  
adippe;0.996136731604137;  
MN142730;Lepidoptera;Polyommatus escheri;Polyommatus escheri;1;Polyommatus  
escheri;0.999999984827042;  
MN142732;Lepidoptera;Melitaea cinxia;Melitaea cinxia;1;Melitaea cinxia;0.999999999999659;  
MN142733;Lepidoptera;Lasiommata megera;Lasiommata megera;1;Lasiommata megera;0.999928528239676;  
MN142734;Lepidoptera;Maniola cecilia;Pyronia cecilia;1;Pyronia cecilia;0.999999999999972;  
MN142735;Lepidoptera;Boloria selene;NA;0.116;Boloria selene;0.99999770118135;  
MN142736;Lepidoptera;Euphydryas intermedia;NA;0.051;NA;0.999999999993892;  
MN142737;Lepidoptera;Euphydryas aurinia;NA;0.31;Euphydryas aurinia;0.993387708761386;  
MN142738;Lepidoptera;Celastrina argiolus;Celastrina argiolus;1;Celastrina  
argiolus;0.999527385150531;  
MN142739;Lepidoptera;Pyrgus carthami;Pyrgus carthami;1;Pyrgus carthami;0.99998997209607;  
MN142740;Lepidoptera;Thymelicus lineola;Thymelicus lineola;1;Thymelicus  
lineola;0.999995927238524;  
MN142741;Lepidoptera;Polyommatus icarus;NA;0.001;Polyommatus icarus;0.998151167252403;  
MN142742;Lepidoptera;Polyommatus icarus;Polyommatus icarus;0.001;Polyommatus  
icarus;0.999851522482238;  
MN142742;Lepidoptera;Polyommatus icarus;Polyommatus icarus;0.001;Polyommatus  
icarus;0.999851522482238;  
MN142745;Lepidoptera;Lasiommata megera;Lasiommata megera;1;Lasiommata megera;0.999379144055441;  
MN142747;Lepidoptera;Cupido minimus;NA;0.009;Cupido minimus;0.999791453712643;  
MN142748;Lepidoptera;Gonepteryx rhamni;NA;0.474;Gonepteryx rhamni;0.982076396127858;  
MN142749;Lepidoptera;Ochlodes sylvanus;NA;0.316;Ochlodes sylvanus;0.996318754838625;  
MN142750;Lepidoptera;Polyommatus thersites;Polyommatus thersites;0.001;Polyommatus  
thersites;0.99999937179697;  
MN142751;Lepidoptera;Cupido argiades;NA;0.499;NA;0.999999999984682;  
MN142754;Lepidoptera;Thymelicus acteon;Thymelicus acteon;1;Thymelicus acteon;0.9999999752248;  
MN142755;Lepidoptera;Gonepteryx rhamni;NA;0.474;Gonepteryx rhamni;0.982076396127858;  
MN142756;Lepidoptera;Lycaena tityrus;Lycaena tityrus;1;Lycaena tityrus;0.99999828238034;  
MN142757;Lepidoptera;Colias crocea;NA;0.059;NA;0.999999999999738;  
MN142758;Lepidoptera;Boloria euphrosyne;Boloria euphrosyne;1;Boloria  
euphrosyne;0.999996904544576;  
MN142759;Lepidoptera;Pyrgus malvae;Pyrgus malvae;0.001;Pyrgus malvae;0.995560369195123;  
MN142760;Lepidoptera;Colias hyale;Colias hyale;0.015;Colias hyale;0.999997884296128;  
MN142763;Lepidoptera;Aglais urticae;NA;0.002;Aglais urticae;0.987497593219019;  
MN142768;Lepidoptera;Polyommatus thersites;Polyommatus thersites;0.001;Polyommatus  
thersites;0.999998835547;  
MN142769;Lepidoptera;Cupido argiades;NA;0.499;NA;0.999999999984682;  
MN142770;Lepidoptera;Issoria lathonia;Issoria lathonia;1;Issoria lathonia;0.99999999989257;  
MN142771;Lepidoptera;Satyrus actaea;Satyrus actaea;1;Satyrus actaea;0.997626103709599;  
MN142772;Lepidoptera;Colias crocea;NA;0.059;NA;0.999999999999738;  
MN142776;Lepidoptera;Melitaea varia;Melitaea varia;1;Melitaea varia;0.999997979169815;  
MN142777;Lepidoptera;Lysandra hispana;NA;NA;NA;0.991563113687904;  
MN142779;Lepidoptera;Melitaea nevadensis;NA;0.001;Melitaea celadussa;0.727568537860761;  
MN142780;Lepidoptera;Ochlodes sylvanus;NA;0.316;Ochlodes sylvanus;0.996318754838625;  
MN142781;Lepidoptera;Polyommatus celina;Polyommatus celina;0.002;Polyommatus  
celina;0.99999999849734;  
MN142783;Lepidoptera;Gonepteryx rhamni;NA;0.474;Gonepteryx rhamni;0.982076396127858;  
MN142784;Lepidoptera;Lasiommata megera;Lasiommata megera;1;Lasiommata megera;0.999928528239676;  
MN142786;Lepidoptera;Melitaea deione;Melitaea deione;1;Melitaea deione;0.999997196331216;

MN142787;Lepidoptera;Thymelicus acteon;Thymelicus acteon;1;Thymelicus acteon;0.99999999752248;  
 MN142789;Lepidoptera;Pyrgus andromedae;Pyrgus andromedae;0.001;Pyrgus  
 andromedae;0.997448239493065;  
 MN142790;Lepidoptera;Lasiommata maera;Lasiommata maera;1;Lasiommata maera;0.999996670091976;  
 MN142791;Lepidoptera;Fabriciana niobe;NA;0.005;Fabriciana niobe;0.992125835358755;  
 MN142793;Lepidoptera;Boloria euphrosyne;Boloria euphrosyne;1;Boloria  
 euphrosyne;0.999998276608842;  
 MN142794;Lepidoptera;Maniola jurtina;NA;0.011;NA;0.999999999999484;  
 MN142796;Lepidoptera;Iolana iolas;Iolana iolas;1;Iolana iolas;0.999997520975743;  
 MN142797;Lepidoptera;Aricia cramera;Aricia cramera;1;Aricia cramera;0.999993731037033;  
 MN142798;Lepidoptera;Lycaena dispar;Lycaena dispar;1;Lycaena dispar;0.999999990743959;  
 MN142799;Lepidoptera;Erebia montana;Erebia montana;1;Erebia montana;0.999855571743067;  
 MN142800;Lepidoptera;Melitaea nevadensis;NA;0.487;Melitaea celadussa;0.99630462995506;  
 MN142802;Lepidoptera;Polyommatus icarus;NA;0.007;Polyommatus icarus;0.999081737461227;  
 MN142802;Lepidoptera;Polyommatus icarus;NA;0.007;Polyommatus icarus;0.999081737461227;  
 MN142803;Lepidoptera;Aricia agestis;NA;0.067;Aricia agestis;0.999509743227786;  
 MN142804;Lepidoptera;Colias crocea;NA;0.059;NA;0.99999999999738;  
 MN142805;Lepidoptera;Satyrus ferula;Satyrus ferula;0.998;Satyrus ferula;0.996962587889543;  
 MN142806;Lepidoptera;Thymelicus lineola;Thymelicus lineola;1;Thymelicus  
 lineola;0.999998506216692;  
 MN142807;Lepidoptera;Maniola jurtina;NA;0.001;Maniola jurtina;0.939220105860875;  
 MN142808;Lepidoptera;Aphantopus hyperantus;Aphantopus hyperantus;0.009;Aphantopus  
 hyperantus;0.999523934516809;  
 MN142809;Lepidoptera;Melitaea nevadensis;NA;0.074;Melitaea celadussa;0.705935327809097;  
 MN142810;Lepidoptera;Maniola jurtina;NA;0.015;Maniola jurtina;0.946667625757087;  
 MN142811;Lepidoptera;Coenonympha gardetta;NA;0.004;NA;0.999999999999983;  
 MN142813;Lepidoptera;Cupido minimus;NA;0.001;Cupido minimus;0.999745381116148;  
 MN142816;Lepidoptera;Hipparchia fagi;Hipparchia fagi;NA;Hipparchia fagi;0.962096851442989;  
 MN142817;Lepidoptera;Pyrgus onopordi;Pyrgus onopordi;1;Pyrgus onopordi;0.999997111229755;  
 MN142818;Lepidoptera;Ochlodes sylvanus;NA;0.316;Ochlodes sylvanus;0.996318754838625;  
 MN142819;Lepidoptera;Plebejus argus;NA;0.131;Plebejus argus;0.979361502252607;  
 MN142820;Lepidoptera;Satyrium w-album;NA;0.056;Satyrium w-album;0.989378230996316;  
 MN142821;Lepidoptera;Lasiommata megera;Lasiommata megera;1;Lasiommata megera;0.999379144055441;  
 MN142828;Lepidoptera;Pyrgus armoricanus;Pyrgus armoricanus;1;Pyrgus  
 armoricanus;0.999997353848817;  
 MN142829;Lepidoptera;Fabriciana niobe;Fabriciana niobe;0.001;Fabriciana niobe;0.93186202957215;  
 MN142830;Lepidoptera;Argynnis paphia;Argynnis paphia;1;Argynnis paphia;0.999999991389927;  
 MN142831;Lepidoptera;Coenonympha pamphilus;Coenonympha pamphilus;1;Coenonympha  
 pamphilus;0.9999999999999744;  
 MN142832;Lepidoptera;Lycaena tityrus;Lycaena tityrus;1;Lycaena tityrus;0.999997855580031;  
 MN142833;Lepidoptera;Euphydryas aurinia;NA;0.125;Euphydryas aurinia;0.988561412305061;  
 MN142834;Lepidoptera;Satyrium spini;Satyrium spini;1;Satyrium spini;0.999999835426407;  
 MN142835;Lepidoptera;Nymphalis io;NA;0.491;Aglais io;0.930153237246992;  
 MN142836;Lepidoptera;Satyrium spini;Satyrium spini;1;Satyrium spini;0.999996354401924;  
 MN142837;Lepidoptera;Maniola jurtina;NA;0.012;Maniola jurtina;0.91755716175482;  
 MN142839;Lepidoptera;Thymelicus lineola;Thymelicus lineola;1;Thymelicus  
 lineola;0.999995927238524;  
 MN142840;Lepidoptera;Carcharodus baeticus;Carcharodus baeticus;1;Carcharodus  
 baeticus;0.999983899664537;  
 MN142841;Lepidoptera;Lycaena tityrus;Lycaena tityrus;1;Lycaena tityrus;0.999998928238034;  
 MN142842;Lepidoptera;Chazara briseis;Chazara briseis;1;Chazara briseis;0.999980393060755;  
 MN142844;Lepidoptera;Thymelicus sylvestris;NA;0.324;Thymelicus sylvestris;0.999940778442454;  
 MN142845;Lepidoptera;Lycaena tityrus;Lycaena tityrus;1;Lycaena tityrus;0.999991658456284;  
 MN142846;Lepidoptera;Maniola jurtina;NA;0.001;Maniola jurtina;0.939220105860875;  
 MN142847;Lepidoptera;Fabriciana niobe;NA;0.003;Fabriciana niobe;0.995581845253793;  
 MN142848;Lepidoptera;Hipparchia semele;NA;NA;Hipparchia semele;0.748345401572611;  
 MN142849;Lepidoptera;Erebia melampus;Erebia melampus;0.011;Erebia melampus;0.975499903768874;  
 MN142851;Lepidoptera;Pyrgus onopordi;Pyrgus onopordi;1;Pyrgus onopordi;0.999997111229755;  
 MN142853;Lepidoptera;Vanessa cardui;Vanessa cardui;1;Vanessa cardui;0.999999803450484;  
 MN142854;Lepidoptera;Polyommatus daphnis;Polyommatus daphnis;1;Polyommatus  
 daphnis;0.999948431341266;  
 MN142855;Lepidoptera;Maniola cecilia;Pyronia cecilia;NA;Pyronia cecilia;1;  
 MN142856;Lepidoptera;Pyrgus malvoides;NA;0.176;Pyrgus malvoides;0.94049080379026;  
 MN142857;Lepidoptera;Limenitis camilla;Limenitis camilla;0.008;Limenitis  
 camilla;0.999986607902206;  
 MN142858;Lepidoptera;Hipparchia fidia;Hipparchia fidia;1;Hipparchia fidia;1;  
 MN142860;Lepidoptera;Satyrus actaea;Satyrus actaea;1;Satyrus actaea;0.99922708675474;  
 MN142861;Lepidoptera;Aporia crataegi;NA;NA;Aporia crataegi;0.999996781126733;  
 MN142862;Lepidoptera;Heteropterus morpheus;NA;NA;Heteropterus morpheus;0.999999999999915;  
 MN142864;Lepidoptera;Thymelicus sylvestris;Thymelicus sylvestris;1;Thymelicus  
 sylvestris;0.99999981568351;  
 MN142865;Lepidoptera;Plebejus argus;NA;0.122;Plebejus argus;0.956948912376078;  
 MN142866;Lepidoptera;Anthocharis cardamines;Anthocharis cardamines;1;Anthocharis  
 cardamines;0.999999805933546;  
 MN142867;Lepidoptera;Thecla betulae;Thecla betulae;1;Thecla betulae;0.99999999728374;  
 MN142868;Lepidoptera;Pieris napi;NA;0.011;Pieris napi;0.801985394724814;  
 MN142869;Lepidoptera;Maniola cecilia;Pyronia cecilia;1;Pyronia cecilia;1;  
 MN142870;Lepidoptera;Erebia pronoe;Erebia pronoe;1;Erebia pronoe;0.99980482908169;

MN142871;Lepidoptera;Colias alfacariensis;Colias alfacariensis;1;Colias alfacariensis;0.999884626735918;  
MN142874;Lepidoptera;Coenonympha pamphilus;Coenonympha pamphilus;1;Coenonympha pamphilus;0.99999999999744;  
MN142875;Lepidoptera;Thymelicus sylvestris;Thymelicus sylvestris;1;Thymelicus sylvestris;0.99999985935205;  
MN142876;Lepidoptera;Lasiommata megera;Lasiommata megera;1;Lasiommata megera;0.999806890129977;  
MN142877;Lepidoptera;Melitaea didyma;Melitaea didyma;1;Melitaea didyma;0.999768602965124;  
MN142878;Lepidoptera;Thymelicus sylvestris;Thymelicus sylvestris;1;Thymelicus sylvestris;0.99999981568351;  
MN142879;Lepidoptera;Anthocharis cardamines;Anthocharis cardamines;1;Anthocharis cardamines;0.999999940675226;  
MN142880;Lepidoptera;Coenonympha pamphilus;Coenonympha pamphilus;1;Coenonympha pamphilus;0.99999999999744;  
MN142881;Lepidoptera;Hipparchia semele;NA;NA;Hipparchia semele;0.748345401572611;  
MN142882;Lepidoptera;Erebia euryale;NA;NA;Erebia euryale;0.925623445172181;  
MN142883;Lepidoptera;Lysandra coridon;Lysandra coridon;NA;Lysandra coridon;0.935848180514696;  
MN142884;Lepidoptera;Glaucopsyche alexis;Glaucopsyche alexis;0.001;Glaucopsyche alexis;0.94042380088325;  
MN142885;Lepidoptera;Polyommatus dolus;Polyommatus dolus;0.004;Polyommatus dolus;0.876833853168453;  
MN142886;Lepidoptera;Nymphalis io;NA;0.491;Aglais io;0.930153237246992;  
MN142887;Lepidoptera;Melitaea deione;Melitaea deione;1;Melitaea deione;0.999999385597466;  
MN142888;Lepidoptera;Apatura ilia;Apatura ilia;0.019;Apatura ilia;0.992437269784115;  
MN142889;Lepidoptera;Lampides boeticus;Lampides boeticus;1;Lampides boeticus;0.99999999545906;  
MN142890;Lepidoptera;Aphantopus hyperantus;Aphantopus hyperantus;0.004;Aphantopus hyperantus;0.999598909345147;  
MN142891;Lepidoptera;Brintesia circe;Brintesia circe;1;Brintesia circe;0.99999779997825;  
MN142892;Lepidoptera;Maniola jurtina;NA;0.167;Maniola jurtina;0.706593343642011;  
MN142894;Lepidoptera;Erebia cassioides;NA;NA;NA;0.99999999999875;  
MN142896;Lepidoptera;Brenthis daphne;Brenthis daphne;0.006;Brenthis daphne;0.984559944066479;  
MN142897;Lepidoptera;Argynnis paphia;Argynnis paphia;1;Argynnis paphia;0.99999991389927;  
MN142900;Lepidoptera;Cupido alcetas;NA;0.218;Cupido alcetas;0.833501983138177;  
MN142901;Lepidoptera;Pieris napi;NA;0.028;Pieris napi;0.888205720664699;  
MN142902;Lepidoptera;Polyommatus eros;NA;0.005;Polyommatus eros;0.95275169203039;  
MN142904;Lepidoptera;Brintesia circe;Brintesia circe;NA;Brintesia circe;0.99999894309325;  
MN142906;Lepidoptera;Fabriciana niobe;Fabriciana niobe;0.001;Fabriciana niobe;0.93186202957215;  
MN142908;Lepidoptera;Colias crocea;NA;NA;Colias crocea;0.712033440980586;  
MN142909;Lepidoptera;Boloria euphrosyne;Boloria euphrosyne;1;Boloria euphrosyne;0.999999204024765;  
MN142910;Lepidoptera;Brintesia circe;Brintesia circe;NA;Brintesia circe;0.999999813082031;  
MN142911;Lepidoptera;Maniola jurtina;NA;0.012;Maniola jurtina;0.91755716175482;  
MN142913;Lepidoptera;Nymphalis io;NA;0.491;Aglais io;0.930153237246992;  
MN142917;Lepidoptera;Colias crocea;NA;0.059;NA;0.99999999999738;  
MN142918;Lepidoptera;Thymelicus sylvestris;Thymelicus sylvestris;1;Thymelicus sylvestris;0.99999981568351;  
MN142919;Lepidoptera;Aporia crataegi;NA;0.001;Aporia crataegi;0.999999008625346;  
MN142920;Lepidoptera;Coenonympha gardetta;NA;0.001;Coenonympha gardetta;0.741030700939901;  
MN142923;Lepidoptera;Plebejus argus;NA;0.036;Plebejus argus;0.988160277018267;  
MN142925;Lepidoptera;Aricia agestis;NA;0.253;Aricia agestis;0.996350017387504;  
MN142926;Lepidoptera;Aricia eumedon;Eumedonia eumedon;0.006;Eumedonia eumedon;0.996302867125166;  
MN142928;Lepidoptera;Lampides boeticus;Lampides boeticus;NA;Lampides boeticus;0.99999999552557;  
MN142930;Lepidoptera;Papilio machaon;Papilio machaon;NA;Papilio machaon;0.998259418780604;  
MN142932;Lepidoptera;Coenonympha pamphilus;Coenonympha pamphilus;1;Coenonympha pamphilus;0.99999999999488;  
MN142933;Lepidoptera;Pieris napi;NA;0.007;Pieris napi;0.915028488252331;  
MN142934;Lepidoptera;Argynnis paphia;Argynnis paphia;1;Argynnis paphia;0.99999991389927;  
MN142938;Lepidoptera;Hamearis lucina;NA;NA;Hamearis lucina;0.99999999984141;  
MN142939;Lepidoptera;Ochlodes sylvanus;NA;0.316;Ochlodes sylvanus;0.996318754838625;  
MN142940;Lepidoptera;Satyrium w-album;Satyrium w-album;0.019;Satyrium w-album;0.99894772665936;  
MN142941;Lepidoptera;Colias crocea;NA;0.059;NA;0.99999999999738;  
MN142943;Lepidoptera;Pieris napi;NA;0.011;Pieris napi;0.801985394724814;  
MN142944;Lepidoptera;Pyrgus malvae;Pyrgus malvae;NA;Pyrgus malvae;0.980121140374433;  
MN142947;Lepidoptera;Erebia epiphron;NA;0.114;Erebia epiphron;0.960944657765279;  
MN142948;Lepidoptera;Thymelicus acteon;Thymelicus acteon;1;Thymelicus acteon;0.9999999752248;  
MN142950;Lepidoptera;Cupido minimus;NA;0.001;Cupido minimus;0.999792714921789;  
MN142951;Lepidoptera;Gegenes pumilio;Gegenes pumilio;0.002;Gegenes pumilio;0.999974446001233;  
MN142953;Lepidoptera;Maniola jurtina;NA;NA;Maniola jurtina;0.973823960006955;  
MN142957;Lepidoptera;Erebia tyndarus;NA;NA;NA;0.99999999999923;  
MN142958;Lepidoptera;Nymphalis c-album;NA;0.215;NA;0.999999192918557;  
MN142961;Lepidoptera;Plebejus idas;NA;0.007;NA;0.999546324331549;  
MN142962;Lepidoptera;Maniola jurtina;NA;0.012;Maniola jurtina;0.91755716175482;  
MN142965;Lepidoptera;Maniola jurtina;NA;0.222;Maniola jurtina;0.905715799372729;  
MN142966;Lepidoptera;Nymphalis io;NA;0.491;Aglais io;0.930153237246992;  
MN142967;Lepidoptera;Pieris rapae;Pieris rapae;NA;Pieris rapae;0.999991467066392;  
MN142969;Lepidoptera;Pyrgus onopordi;Pyrgus onopordi;1;Pyrgus onopordi;0.999997111229755;  
MN142970;Lepidoptera;Pieris napi;NA;0.028;Pieris napi;0.888205720664699;

MN142971;Lepidoptera;Pyrgus andromedae;Pyrgus andromedae;0.001;Pyrgus andromedae;0.998828669843251;  
MN142973;Lepidoptera;Thymelicus lineola;Thymelicus lineola;1;Thymelicus lineola;0.999995927238524;  
MN142974;Lepidoptera;Maniola jurtina;NA;0.001;Maniola jurtina;0.939220105860875;  
MN142976;Lepidoptera;Carcharodus alceae;Carcharodus alceae;1;Carcharodus alceae;0.99999998465938;  
MN142978;Lepidoptera;Aricia eumedon;Eumedonia eumedon;1;Eumedonia eumedon;0.998868717328798;  
MN142980;Lepidoptera;Lasiommata megera;Lasiommata megera;1;Lasiommata megera;0.999928528239676;  
MN142982;Lepidoptera;Aglaia urticae;NA;0.002;Aglaia urticae;0.987497593219019;  
MN142983;Lepidoptera;Maniola jurtina;NA;0.001;Maniola jurtina;0.939220105860875;  
MN142984;Lepidoptera;Agriades orbitulus;NA;0.01;Agriades orbitulus;0.998991302227708;  
MN142986;Lepidoptera;Pieris napi;NA;0.011;Pieris napi;0.801985394724814;  
MN142987;Lepidoptera;Lasiommata megera;Lasiommata megera;1;Lasiommata megera;0.999928528239676;  
MN142989;Lepidoptera;Maniola jurtina;NA;NA;NA;0.9999999985062;  
MN142991;Lepidoptera;Lampides boeticus;Lampides boeticus;1;Lampides boeticus;0.999999998492399;  
MN142992;Lepidoptera;Pieris napi;NA;0.028;Pieris napi;0.888205720664699;  
MN142993;Lepidoptera;Anthocharis euphenoides;NA;0.043;Anthocharis euphenoides;0.966209454720726;  
MN142995;Lepidoptera;Maniola jurtina;NA;NA;NA;0.999999999984682;  
MN142996;Lepidoptera;Cupido argiades;NA;0.499;NA;0.999999999984682;  
MN142997;Lepidoptera;Melitaea cinxia;Melitaea cinxia;1;Melitaea cinxia;0.99999999999801;  
MN142998;Lepidoptera;Limenitis camilla;Limenitis camilla;0.009;Limenitis camilla;0.9999828626808;  
MN143000;Lepidoptera;Pieris napi;NA;0.028;Pieris napi;0.888205720664699;  
MN143001;Lepidoptera;Ochlodes sylvanus;NA;0.316;Ochlodes sylvanus;0.996318754838625;  
MN143002;Lepidoptera;Coenonympha dorus;Coenonympha dorus;1;Coenonympha dorus;0.999999993272183;  
MN143003;Lepidoptera;Thymelicus acteon;Thymelicus acteon;1;Thymelicus acteon;0.99999999752248;  
MN143006;Lepidoptera;Gegenes nostrodamus;Gegenes nostrodamus;1;Gegenes nostrodamus;0.999999996883645;  
MN143008;Lepidoptera;Thymelicus lineola;Thymelicus lineola;1;Thymelicus lineola;0.999996811489861;  
MN143014;Lepidoptera;Lasiommata megera;Lasiommata megera;1;Lasiommata megera;0.999928528239676;  
MN143015;Lepidoptera;Coenonympha pamphilus;Coenonympha pamphilus;1;Coenonympha pamphilus;0.99999999999744;  
MN143016;Lepidoptera;Maniola jurtina;NA;0.001;Maniola jurtina;0.939220105860875;  
MN143021;Lepidoptera;Brenthis daphne;NA;0.102;Brenthis daphne;0.717134521611551;  
MN143022;Lepidoptera;Melitaea deione;Melitaea deione;1;Melitaea deione;0.999996202527362;  
MN143024;Lepidoptera;Lasiommata maera;Lasiommata maera;1;Lasiommata maera;0.999970265953772;  
MN143025;Lepidoptera;Hipparchia leighebi;Hipparchia leighebi;0.999;Hipparchia leighebi;0.976785743085418;  
MN143027;Lepidoptera;Melitaea cinxia;Melitaea cinxia;1;Melitaea cinxia;0.99999999999631;  
MN143028;Lepidoptera;Colias crocea;NA;NA;NA;0.99999999999604;  
MN143030;Lepidoptera;Maniola cecilia;Pyronia cecilia;NA;Pyronia cecilia;1;  
MN143031;Lepidoptera;Thymelicus acteon;Thymelicus acteon;1;Thymelicus acteon;0.99999999752248;  
MN143032;Lepidoptera;Maniola jurtina;NA;0.001;Maniola jurtina;0.939220105860875;  
MN143033;Lepidoptera;Lasiommata megera;Lasiommata megera;1;Lasiommata megera;0.999379144055441;  
MN143035;Lepidoptera;Brintesia circe;Brintesia circe;1;Brintesia circe;0.99999696306634;  
MN143036;Lepidoptera;Argynnis paphia;Argynnis paphia;1;Argynnis paphia;0.99999991389927;  
MN143037;Lepidoptera;Boloria selene;NA;0.281;Boloria selene;0.99999606392712;  
MN143038;Lepidoptera;Brintesia circe;Brintesia circe;1;Brintesia circe;0.9999951254154;  
MN143039;Lepidoptera;Nymphalis c-album;NA;0.215;NA;0.999999192918557;  
MN143040;Lepidoptera;Carcharodus alceae;Carcharodus alceae;1;Carcharodus alceae;0.99999998465938;  
MN143043;Lepidoptera;Cupido alcetas;NA;0.218;Cupido alcetas;0.833501983138177;  
MN143048;Lepidoptera;Carterocephalus palaemon;NA;0.047;Carterocephalus palaemon;0.735855417590782;  
MN143050;Lepidoptera;Satyrium esculi;Satyrium esculi;1;Satyrium esculi;0.99999957367948;  
MN143051;Lepidoptera;Carcharodus alceae;Carcharodus alceae;1;Carcharodus alceae;0.99999998465938;  
MN143052;Lepidoptera;Maniola jurtina;NA;0.012;Maniola jurtina;0.91755716175482;  
MN143057;Lepidoptera;Colias crocea;NA;0.059;NA;0.99999999999738;  
MN143058;Lepidoptera;Colias alfacariensis;Colias alfacariensis;1;Colias alfacariensis;0.999944653442302;  
MN143060;Lepidoptera;Lycaena tityrus;Lycaena tityrus;1;Lycaena tityrus;0.999997842720344;  
MN143062;Lepidoptera;Gonepteryx cleopatra;Gonepteryx cleopatra;0.998;Gonepteryx cleopatra;0.999118636582266;  
MN143063;Lepidoptera;Thymelicus sylvestris;Thymelicus sylvestris;1;Thymelicus sylvestris;0.99999985935205;  
MN143065;Lepidoptera;Melanargia galathea;Melanargia galathea;NA;Melanargia galathea;0.959429932872284;  
MN143066;Lepidoptera;Brintesia circe;Brintesia circe;1;Brintesia circe;0.99999660260074;  
MN143067;Lepidoptera;Boloria selene;NA;0.237;Boloria selene;0.99999370529649;  
MN143069;Lepidoptera;Pieris napi;NA;0.011;Pieris napi;0.801985394724814;  
MN143072;Lepidoptera;Nymphalis c-album;NA;0.215;NA;0.999999192918557;  
MN143073;Lepidoptera;Pieris napi;NA;0.011;Pieris napi;0.801985394724814;  
MN143075;Lepidoptera;Melitaea didyma;Melitaea didyma;1;Melitaea didyma;0.999802889137687;  
MN143077;Lepidoptera;Lycaena phlaeas;Lycaena phlaeas;1;Lycaena phlaeas;0.99999996363186;  
MN143079;Lepidoptera;Maniola jurtina;NA;0.001;Maniola jurtina;0.939220105860875;

MN143080;Lepidoptera;Melitaea deione;Melitaea deione;1;Melitaea deione;0.999992252675381;  
MN143081;Lepidoptera;Lasiommata paramegaera;Lasiommata paramegaera;0.999;Lasiommata  
paramegaera;0.995283446287531;  
MN143082;Lepidoptera;Melitaea nevadensis;Melitaea celadussa;0.996;Melitaea  
celadussa;0.994902076096652;  
MN143083;Lepidoptera;Satyrium esculi;Satyrium esculi;1;Satyrium esculi;0.999999957367948;  
MN143084;Lepidoptera;Nymphalis io;NA;0.491;Aglais io;0.930153237246992;  
MN143086;Lepidoptera;Maniola jurtina;NA;0.012;Maniola jurtina;0.91755716175482;  
MN143087;Lepidoptera;Maniola jurtina;NA;0.001;Maniola jurtina;0.939220105860875;  
MN143088;Lepidoptera;Iolana iolas;Iolana iolas;1;Iolana iolas;0.999998642388204;  
MN143089;Lepidoptera;Pyrgus malvoides;NA;0.068;Pyrgus malvoides;0.9357596949685;  
MN143090;Lepidoptera;Anthocharis euphenoides;NA;0.172;Anthocharis euphenoides;0.943741664916385;  
MN143091;Lepidoptera;Colias crocea;NA;0.059;NA;0.999999999999738;  
MN143092;Lepidoptera;Satyrium w-album;NA;0.056;Satyrium w-album;0.989378230996316;  
MN143093;Lepidoptera;Maniola jurtina;NA;0.001;Maniola jurtina;0.939220105860875;  
MN143094;Lepidoptera;Thymelicus lineola;Thymelicus lineola;1;Thymelicus  
lineola;0.999995927238524;  
MN143095;Lepidoptera;Thymelicus acteon;Thymelicus acteon;1;Thymelicus acteon;0.9999999752248;  
MN143097;Lepidoptera;Cupido alcetas;NA;0.218;Cupido alcetas;0.833501983138177;  
MN143099;Lepidoptera;Cupido argiades;NA;0.499;NA;0.999999999984682;  
MN143100;Lepidoptera;Nymphalis c-album;NA;0.215;NA;0.999999192918557;  
MN143101;Lepidoptera;Aporia crataegi;NA;NA;Aporia crataegi;0.999996781126733;  
MN143104;Lepidoptera;Thecla betulae;Thecla betulae;1;Thecla betulae;0.99999999972886;  
MN143105;Lepidoptera;Erebia melampus;Erebia melampus;0.011;Erebia melampus;0.975499903768874;  
MN143106;Lepidoptera;Fabriciana adippe;Fabriciana adippe;NA;Fabriciana adippe;0.861972738590056;  
MN143108;Lepidoptera;Coenonympha pamphilus;Coenonympha pamphilus;1;Coenonympha  
pamphilus;0.999999999999886;  
MN143109;Lepidoptera;Polyommatus dorylas;Polyommatus dorylas;0.001;Polyommatus  
dorylas;0.991715972822683;  
MN143110;Lepidoptera;Hipparchia semele;NA;0.001;Hipparchia semele;0.824269221281445;  
MN143112;Lepidoptera;Boloria euphrosyne;Boloria euphrosyne;0.001;Boloria  
euphrosyne;0.999985640170951;  
MN143113;Lepidoptera;Euphydryas cynthia;Euphydryas cynthia;1;Euphydryas  
cynthia;0.99999999705039;  
MN143115;Lepidoptera;Aricia eumedon;Eumedonia eumedon;1;Eumedonia eumedon;0.99887319009208;  
MN143116;Lepidoptera;Polyommatus damon;Polyommatus damon;1;Polyommatus damon;0.999995614754605;  
MN143117;Lepidoptera;Melitaea britomartis;NA;NA;Melitaea britomartis;0.967141946779686;  
MN143118;Lepidoptera;Boloria euphrosyne;Boloria euphrosyne;1;Boloria  
euphrosyne;0.99999888858929;  
MN143119;Lepidoptera;Erynnis tages;Erynnis tages;1;Erynnis tages;0.999989580452818;  
MN143120;Lepidoptera;Lasiommata maera;Lasiommata maera;1;Lasiommata maera;0.99999510792253;  
MN143123;Lepidoptera;Melitaea nevadensis;NA;0.002;NA;0.99999999925082;  
MN143126;Lepidoptera;Polyommatus escheri;Polyommatus escheri;1;Polyommatus  
escheri;0.99999995941579;  
MN143127;Lepidoptera;Pieris napi;NA;NA;Pieris napi;0.836306480279093;  
MN143128;Lepidoptera;Plebejus argyrognomon;NA;0.001;NA;0.994620093546684;  
MN143130;Lepidoptera;Melitaea britomartis;NA;NA;Melitaea britomartis;0.956350416682137;  
MN143131;Lepidoptera;Coenonympha pamphilus;Coenonympha pamphilus;1;Coenonympha  
pamphilus;0.99999999999946;  
MN143132;Lepidoptera;Erynnis tages;Erynnis tages;1;Erynnis tages;0.999999281987018;  
MN143134;Lepidoptera;Glaucopsyche alexis;Glaucopsyche alexis;0.001;Glaucopsyche  
alexis;0.958450603105734;  
MN143135;Lepidoptera;Pyrgus armoricanus;Pyrgus armoricanus;1;Pyrgus  
armoricanus;0.999998421532633;  
MN143136;Lepidoptera;Satyrium spini;Satyrium spini;1;Satyrium spini;0.99999835426407;  
MN143137;Lepidoptera;Pyrgus carthami;Pyrgus carthami;1;Pyrgus carthami;0.999999465395633;  
MN143138;Lepidoptera;Maniola jurtina;NA;NA;NA;0.99999999827933;  
MN143139;Lepidoptera;Erebia medusa;NA;0.009;Erebia medusa;0.986275612856827;  
MN143140;Lepidoptera;Satyrium spini;Satyrium spini;1;Satyrium spini;0.99999835426407;  
MN143142;Lepidoptera;Brenthis ino;Brenthis ino;0.003;Brenthis ino;0.98906191156141;  
MN143144;Lepidoptera;Erebia mnestra;Erebia mnestra;0.002;Erebia mnestra;0.999845899963913;  
MN143145;Lepidoptera;Pyrgus cacaliae;NA;0.003;Pyrgus cacaliae;0.982350410843202;  
MN143146;Lepidoptera;Lasiommata megera;Lasiommata megera;1;Lasiommata megera;0.999379144055441;  
MN143149;Lepidoptera;Aricia agestis;NA;0.067;Aricia agestis;0.999509743227786;  
MN143152;Lepidoptera;Cupido minimus;NA;0.009;Cupido minimus;0.999791453712643;  
MN143157;Lepidoptera;Melitaea didyma;Melitaea didyma;1;Melitaea didyma;0.999209434205905;  
MN143158;Lepidoptera;Argynnis aglaja;NA;NA;Speyeria aglaja;0.872991147917853;  
MN143160;Lepidoptera;Maniola jurtina;NA;0.012;Maniola jurtina;0.91755716175482;  
MN143162;Lepidoptera;Gonepteryx rhamni;NA;0.192;Gonepteryx rhamni;0.991002175992451;  
MN143163;Lepidoptera;Polyommatus thersites;Polyommatus thersites;0.999;Polyommatus  
thersites;0.9999985539095;  
MN143164;Lepidoptera;Callophrys rubi;NA;0.002;Callophrys rubi;0.99767885639734;  
MN143165;Lepidoptera;Melitaea parthenoides;Melitaea parthenoides;1;Melitaea  
parthenoides;0.99999993530452;  
MN143167;Lepidoptera;Boloria napaea;Boloria napaea;1;Boloria napaea;0.997442607806657;  
MN143169;Lepidoptera;Minois dryas;NA;0.025;Minois dryas;0.850746026247397;  
MN143170;Lepidoptera;Hipparchia leighebi;Hipparchia leighebi;0.001;Hipparchia  
leighebi;0.948180308041629;

MN143171;Lepidoptera;Euphydryas maturna;NA;NA;NA;0.999999999996973;  
MN143173;Lepidoptera;Lycaena phlaeas;Lycaena phlaeas;1;Lycaena phlaeas;0.9999999996363186;  
MN143174;Lepidoptera;Maniola jurtina;NA;0.012;Maniola jurtina;0.91755716175482;  
MN143175;Lepidoptera;Vanessa atalanta;Vanessa atalanta;1;Vanessa atalanta;0.999999999757762;  
MN143176;Lepidoptera;Euphydryas aurinia;NA;0.001;Euphydryas aurinia;0.995576749826865;  
MN143177;Lepidoptera;Pieris napi;NA;0.003;Pieris napi;0.892543162454987;  
MN143178;Lepidoptera;Hipparchia semele;NA;0.001;Hipparchia semele;0.777513368528489;  
MN143179;Lepidoptera;Lysandra coridon;NA;NA;NA;0.997416858232146;  
MN143180;Lepidoptera;Maniola jurtina;NA;0.012;Maniola jurtina;0.91755716175482;  
MN143181;Lepidoptera;Satyrium esculi;Satyrium esculi;1;Satyrium esculi;0.999999957367948;  
MN143183;Lepidoptera;Cupido minimus;NA;0.001;Cupido minimus;0.999870071041551;  
MN143184;Lepidoptera;Colias crocea;NA;0.059;NA;0.99999999999738;  
MN143185;Lepidoptera;Pieris napi;NA;0.011;Pieris napi;0.801985394724814;  
MN143186;Lepidoptera;Ochlodes sylvanus;NA;0.316;Ochlodes sylvanus;0.996318754838625;  
MN143187;Lepidoptera;Cupido osiris;Cupido osiris;1;Cupido osiris;0.999999409588131;  
MN143188;Lepidoptera;Maniola cecilia;Pyronia cecilia;NA;Pyronia cecilia;1;  
MN143190;Lepidoptera;Thymelicus lineola;Thymelicus lineola;1;Thymelicus  
lineola;0.999999324756516;  
MN143191;Lepidoptera;Parnassius apollo;Parnassius apollo;1;Parnassius apollo;0.992704703916692;  
MN143192;Lepidoptera;Polyommatus dolus;Polyommatus dolus;0.001;Polyommatus  
dolus;0.943536644635814;  
MN143193;Lepidoptera;Lasiommata paramegaera;Lasiommata paramegaera;0.999;Lasiommata  
paramegaera;0.995283446287531;  
MN143195;Lepidoptera;Lasiommata maera;Lasiommata maera;1;Lasiommata maera;0.999995617120616;  
MN143196;Lepidoptera;Aricia cramera;Aricia cramera;1;Aricia cramera;0.999993731037033;  
MN143197;Lepidoptera;Celastrina argiolus;Celastrina argiolus;1;Celastrina  
argiolus;0.999527385150531;  
MN143199;Lepidoptera;Plebejus argus;NA;0.043;Plebejus argus;0.956187234366662;  
MN143200;Lepidoptera;Euphydryas aurinia;NA;0.31;Euphydryas aurinia;0.993387708761386;  
MN143201;Lepidoptera;Satyrium acaciae;Satyrium acaciae;1;Satyrium acaciae;0.999999951077798;  
MN143203;Lepidoptera;Polyommatus damon;Polyommatus damon;1;Polyommatus damon;0.99999955196104;  
MN143204;Lepidoptera;Lasiommata maera;Lasiommata maera;1;Lasiommata maera;0.999988599344549;  
MN143205;Lepidoptera;Erebia euryale;NA;NA;Erebia euryale;0.919518760623792;  
MN143206;Lepidoptera;Erebia montana;Erebia montana;1;Erebia montana;0.999855571743067;  
MN143207;Lepidoptera;Euphydryas aurinia;NA;0.31;Euphydryas aurinia;0.993387708761386;  
MN143208;Lepidoptera;Pieris napi;NA;0.011;Pieris napi;0.801985394724814;  
MN143209;Lepidoptera;Maniola jurtina;NA;0.035;Maniola jurtina;0.923116873545229;  
MN143212;Lepidoptera;Coenonympha arcania;NA;0.172;Coenonympha arcania;0.963036309473038;  
MN143214;Lepidoptera;Colias crocea;NA;0.059;NA;0.999999999999738;  
MN143215;Lepidoptera;Maniola jurtina;NA;0.063;Maniola jurtina;0.770025363931686;  
MN143216;Lepidoptera;Glaucopsyche alexis;Glaucopsyche alexis;0.001;Glaucopsyche  
alexis;0.94042380088325;  
MN143220;Lepidoptera;Pyrgus malvoides;NA;0.111;Pyrgus malvoides;0.968399374774442;  
MN143221;Lepidoptera;Maniola cecilia;Pyronia cecilia;NA;Pyronia cecilia;1;  
MN143222;Lepidoptera;Polyommatus escheri;Polyommatus escheri;1;Polyommatus  
escheri;0.999999979404521;  
MN143224;Lepidoptera;Pyrgus malvoides;NA;0.176;Pyrgus malvoides;0.940490890379026;  
MN143225;Lepidoptera;Maniola jurtina;NA;0.001;NA;0.999999999999403;  
MN143227;Lepidoptera;Pyrgus armoricanus;Pyrgus armoricanus;1;Pyrgus  
armoricanus;0.999997353848817;  
MN143228;Lepidoptera;Melitaea didyma;Melitaea didyma;1;Melitaea didyma;0.996366765827355;  
MN143229;Lepidoptera;Aricia cramera;Aricia cramera;1;Aricia cramera;0.999993731037033;  
MN143230;Lepidoptera;Hipparchia statilinus;Hipparchia statilinus;1;Hipparchia  
statilinus;0.999999999999773;  
MN143237;Lepidoptera;Pyrgus malvoides;NA;0.067;Pyrgus malvoides;0.959391728838034;  
MN143238;Lepidoptera;Melitaea cinxia;Melitaea cinxia;1;Melitaea cinxia;0.99999999999801;  
MN143239;Lepidoptera;Arethusana arethusa;Arethusana arethusa;0.019;Arethusana  
arethusa;0.999964353716342;  
MN143240;Lepidoptera;Maniola jurtina;NA;NA;Maniola jurtina;0.951668238126128;  
MN143242;Lepidoptera;Parnassius apollo;Parnassius apollo;1;Parnassius apollo;0.992704703916692;  
MN143243;Lepidoptera;Maniola jurtina;NA;0.001;Maniola jurtina;0.939220105860875;  
MN143244;Lepidoptera;Lasiommata megera;Lasiommata megera;1;Lasiommata megera;0.999379144055441;  
MN143245;Lepidoptera;Carcharodus alceae;Carcharodus alceae;1;Carcharodus  
alceae;0.999999994142229;  
MN143247;Lepidoptera;Hipparchia statilinus;Hipparchia statilinus;1;Hipparchia  
statilinus;0.999999999999602;  
MN143248;Lepidoptera;Brintesia circe;Brintesia circe;NA;Brintesia circe;0.999999813082031;  
MN143249;Lepidoptera;Lysandra coridon;NA;NA;NA;0.998346382460118;  
MN143250;Lepidoptera;Hipparchia fagi;Hipparchia fagi;NA;Hipparchia fagi;0.981381657010155;  
MN143251;Lepidoptera;Thymelicus acteon;Thymelicus acteon;1;Thymelicus acteon;0.999999995402533;  
MN143252;Lepidoptera;Brenthis daphne;Brenthis daphne;0.001;Brenthis daphne;0.99751183194848;  
MN143253;Lepidoptera;Polyommatus thersites;Polyommatus thersites;0.999;Polyommatus  
thersites;0.999999916395897;  
MN143254;Lepidoptera;Melitaea didyma;Melitaea didyma;1;Melitaea didyma;0.997852099274181;  
MN143255;Lepidoptera;Favonius quercus;NA;NA;Favonius quercus;0.73046069582187;  
MN143256;Lepidoptera;Coenonympha arcania;Coenonympha arcania;0.026;Coenonympha  
arcania;0.981712094547519;

MN143260;Lepidoptera;Hipparchia hermione;Hipparchia hermione;1;Hipparchia hermione;0.999791304970896;  
MN143261;Lepidoptera;Euphydryas cynthia;Euphydryas cynthia;1;Euphydryas cynthia;0.999999998847471;  
MN143265;Lepidoptera;Erebia euryale;NA;NA;Erebia euryale;0.893335050550017;  
MN143266;Lepidoptera;Erebia euryale;NA;NA;Erebia euryale;0.912359863356026;  
MN143267;Lepidoptera;Pyrgus carlinae;NA;NA;Pyrgus carlinae;0.854199018204849;  
MN143268;Lepidoptera;Pyrgus malvoides;NA;0.076;Pyrgus malvoides;0.887854315566122;  
MN143269;Lepidoptera;Colias alfacariensis;Colias alfacariensis;0.001;Colias alfacariensis;0.999926026317526;  
MN143270;Lepidoptera;Brintesia circe;Brintesia circe;NA;Brintesia circe;0.999999936425214;  
MN143271;Lepidoptera;Maniola cecilia;Pyronia cecilia;NA;Pyronia cecilia;1;  
MN143273;Lepidoptera;Cupido argiades;NA;0.499;NA;0.99999999984682;  
MN143274;Lepidoptera;Lasiommata maera;Lasiommata maera;1;Lasiommata maera;0.999996200814449;  
MN143276;Lepidoptera;Fabriciana niobe;Fabriciana niobe;0.001;Fabriciana niobe;0.93186202957215;  
MN143277;Lepidoptera;Coenonympha pamphilus;Coenonympha pamphilus;1;Coenonympha pamphilus;0.99999999999744;  
MN143278;Lepidoptera;Boloria euphrosyne;Boloria euphrosyne;1;Boloria euphrosyne;0.99998824779231;  
MN143280;Lepidoptera;Coenonympha pamphilus;Coenonympha pamphilus;1;Coenonympha pamphilus;0.99999999999744;  
MN143281;Lepidoptera;Erebia tyndarus;NA;NA;NA;0.99999999999897;  
MN143282;Lepidoptera;Araschnia levana;Araschnia levana;1;Araschnia levana;0.999999772187832;  
MN143283;Lepidoptera;Pieris napi;NA;NA;Pieris napi;0.93245232297653;  
MN143284;Lepidoptera;Pyrgus cacaliae;Pyrgus cacaliae;0.001;Pyrgus cacaliae;0.986005806776582;  
MN143285;Lepidoptera;Satyrium spini;Satyrium spini;1;Satyrium spini;0.99999721054916;  
MN143286;Lepidoptera;Colias alfacariensis;Colias alfacariensis;1;Colias alfacariensis;0.999944653442302;  
MN143287;Lepidoptera;Carcharodus lavatherae;NA;0.333;Carcharodus lavatherae;0.99839243348919;  
MN143292;Lepidoptera;Plebejus argus;Plebejus argus;0.016;Plebejus argus;0.962605109836459;  
MN143293;Lepidoptera;Pyrgus armoricanus;Pyrgus armoricanus;1;Pyrgus armoricanus;0.999997972872117;  
MN143294;Lepidoptera;Hipparchia fagi;NA;NA;Hipparchia fagi;0.932488155094539;  
MN143295;Lepidoptera;Coenonympha gardetta;NA;0.001;Coenonympha gardetta;0.755947323088537;  
MN143296;Lepidoptera;Pyrgus serratulae;Pyrgus serratulae;1;Pyrgus serratulae;0.99999807446234;  
MN143297;Lepidoptera;Lysandra coridon;Lysandra coridon;NA;Lysandra coridon;0.915150621461042;  
MN143298;Lepidoptera;Lasiommata maera;Lasiommata maera;1;Lasiommata maera;0.99999510792253;  
MN143300;Lepidoptera;Carterocephalus palaemon;NA;0.052;Carterocephalus palaemon;0.728445051795325;  
MN143302;Lepidoptera;Maniola cecilia;Pyronia cecilia;1;Pyronia cecilia;1;  
MN143303;Lepidoptera;Cupido minimus;NA;0.001;Cupido minimus;0.999803920701362;  
MN143304;Lepidoptera;Ochlodes sylvanus;NA;0.316;Ochlodes sylvanus;0.996318754838625;  
MN143305;Lepidoptera;Gonepteryx rhamni;Gonepteryx rhamni;1;Gonepteryx rhamni;0.999673119534565;  
MN143306;Lepidoptera;Favonius quercus;NA;0.176;Favonius quercus;0.828947799604254;  
MN143307;Lepidoptera;Hipparchia semele;NA;0.002;Hipparchia semele;0.784603069619426;  
MN143308;Lepidoptera;Melitaea diamina;NA;0.305;Melitaea diamina;0.999999994065661;  
MN143310;Lepidoptera;Pieris napi;NA;0.028;Pieris napi;0.888205720664699;  
MN143312;Lepidoptera;Hipparchia fagi;Hipparchia fagi;NA;Hipparchia fagi;0.962666151707991;  
MN143313;Lepidoptera;Celastrina argiolus;Celastrina argiolus;1;Celastrina argiolus;0.999527385150531;  
MN143314;Lepidoptera;Plebejus argus;Plebejus argus;0.013;Plebejus argus;0.99029909759821;  
MN143315;Lepidoptera;Maniola jurtina;NA;0.001;Maniola jurtina;0.939220105860875;  
MN143316;Lepidoptera;Pyrgus foulquieri;NA;NA;Pyrgus alveus;0.827119616974978;  
MN143317;Lepidoptera;Maniola jurtina;NA;NA;NA;0.9999999985062;  
MN143319;Lepidoptera;Maniola tithonus;Pyronia tithonus;1;Pyronia tithonus;1;  
MN143320;Lepidoptera;Polyommatus icarus;Polyommatus icarus;0.001;Polyommatus icarus;0.999851522482238;  
MN143321;Lepidoptera;Ochlodes sylvanus;NA;0.316;Ochlodes sylvanus;0.996318754838625;  
MN143322;Lepidoptera;Maniola jurtina;NA;0.001;Maniola jurtina;0.947876651066851;  
MN143323;Lepidoptera;Polyommatus amandus;Polyommatus amandus;0.002;Polyommatus amandus;0.99998879592523;  
MN143324;Lepidoptera;Pyrgus andromedae;Pyrgus andromedae;0.001;Pyrgus andromedae;0.997448239493065;  
MN143326;Lepidoptera;Erynnis tages;Erynnis tages;1;Erynnis tages;0.99999835444304;  
MN143327;Lepidoptera;Polyommatus daphnis;Polyommatus daphnis;1;Polyommatus daphnis;0.999943037097859;  
MN143329;Lepidoptera;Erynnis tages;Erynnis tages;1;Erynnis tages;0.999983101984565;  
MN143330;Lepidoptera;Hipparchia fagi;Hipparchia fagi;NA;Hipparchia fagi;0.986566456150817;  
MN143332;Lepidoptera;Erebia eriphyle;Erebia eriphyle;1;Erebia eriphyle;0.99999983979336;  
MN143333;Lepidoptera;Plebejus argyrognomon;NA;0.001;NA;0.994620093546684;  
MN143335;Lepidoptera;Thymelicus acteon;Thymelicus acteon;1;Thymelicus acteon;0.9999999752248;  
MN143336;Lepidoptera;Lycaena virgaureae;NA;0.209;Lycaena virgaureae;0.999669745100572;  
MN143337;Lepidoptera;Aphantopus hyperantus;Aphantopus hyperantus;0.003;Aphantopus hyperantus;0.99999455871523;  
MN143338;Lepidoptera;Lasiommata megera;Lasiommata megera;1;Lasiommata megera;0.999379144055441;  
MN143340;Lepidoptera;Satyrium ilicis;Satyrium ilicis;1;Satyrium ilicis;0.99999987901305;  
MN143341;Lepidoptera;Boloria titania;Boloria titania;0.001;Boloria titania;0.99983358374111;  
MN143342;Lepidoptera;Lycaena tityrus;Lycaena tityrus;1;Lycaena tityrus;0.999997855580031;



MN143344;Lepidoptera;Pyrgus malvoides;NA;0.076;Pyrgus malvoides;0.887854315566122;  
MN143349;Lepidoptera;Maniola jurtina;NA;0.001;Maniola jurtina;0.939220105860875;  
MN143351;Lepidoptera;Araschnia levana;Araschnia levana;1;Araschnia levana;0.999999772187832;  
MN143352;Lepidoptera;Erebia pluto;Erebia pluto;1;Erebia pluto;0.99999993360746;  
MN143353;Lepidoptera;Nymphalis io;NA;0.491;Aglais io;0.930153237246992;  
MN143354;Lepidoptera;Maniola cecilia;Pyronia cecilia;NA;Pyronia cecilia;1;  
MN143356;Lepidoptera;Pyrgus malvae;Pyrgus malvae;0.999;Pyrgus malvae;0.993531783407179;  
MN143357;Lepidoptera;Plebejus idas;NA;0.007;NA;0.999546324331549;  
MN143362;Lepidoptera;Aricia agestis;NA;0.183;Aricia agestis;0.998850144311886;  
MN143363;Lepidoptera;Thymelicus acteon;Thymelicus acteon;1;Thymelicus acteon;0.9999999752248;  
MN143364;Lepidoptera;Polyommatus icarus;NA;0.007;Polyommatus icarus;0.999081737461227;  
MN143365;Lepidoptera;Erebia medusa;NA;0.019;Erebia medusa;0.988651968705824;  
MN143367;Lepidoptera;Thymelicus sylvestris;NA;0.324;Thymelicus sylvestris;0.999940778442454;  
MN143368;Lepidoptera;Parnassius apollo;Parnassius apollo;1;Parnassius apollo;0.994934896663371;  
MN143369;Lepidoptera;Araschnia levana;Araschnia levana;1;Araschnia levana;0.999999772187832;  
MN143370;Lepidoptera;Cupido alcetas;NA;0.218;Cupido alcetas;0.833501983138177;  
MN143372;Lepidoptera;Aricia agestis;NA;0.094;Aricia agestis;0.991549847542443;  
MN143374;Lepidoptera;Boloria selene;NA;0.275;Boloria selene;0.999999702697396;  
MN143376;Lepidoptera;Nymphalis c-album;NA;0.215;NA;0.999999192918557;  
MN143377;Lepidoptera;Polyommatus eros;NA;0.001;Polyommatus eros;0.976795391869103;  
MN143378;Lepidoptera;Colias crocea;NA;0.059;NA;0.99999999999738;  
MN143379;Lepidoptera;Erebia pronoe;Erebia pronoe;1;Erebia pronoe;0.999250891771858;  
MN143380;Lepidoptera;Lampides boeticus;Lampides boeticus;1;Lampides boeticus;0.99999999281187;  
MN143382;Lepidoptera;Aporia crataegi;NA;NA;Aporia crataegi;0.999996781126733;  
MN143383;Lepidoptera;Melitaea didyma;NA;NA;Melitaea didyma;0.976199308403354;  
MN143384;Lepidoptera;Lycaena virgaureae;NA;0.186;Lycaena virgaureae;0.999491227342155;  
MN143385;Lepidoptera;Melitaea diamina;NA;0.149;Melitaea diamina;0.99999996592464;  
MN143386;Lepidoptera;Polyommatus icarus;NA;0.001;Polyommatus icarus;0.981285528541973;  
MN143387;Lepidoptera;Pyrgus malvae;Pyrgus malvae;NA;Pyrgus malvae;0.980121140374433;  
MN143389;Lepidoptera;Melitaea nevadensis;NA;0.001;NA;0.999999999900955;  
MN143390;Lepidoptera;Aricia cramera;Aricia cramera;1;Aricia cramera;0.99999229282534;  
MN143392;Lepidoptera;Erebia meolans;Erebia meolans;NA;Erebia meolans;0.999835953426128;  
MN143394;Lepidoptera;Maniola jurtina;NA;0.171;Maniola jurtina;0.963697912386445;  
MN143395;Lepidoptera;Pyrgus armoricanus;Pyrgus armoricanus;1;Pyrgus armoricanus;0.999998846664636;  
MN143396;Lepidoptera;Melitaea didyma;Melitaea didyma;0.011;Melitaea didyma;0.994373395712084;  
MN143399;Lepidoptera;Gonepteryx cleopatra;Gonepteryx cleopatra;0.001;Gonepteryx cleopatra;0.998729197375185;  
MN143400;Lepidoptera;Colias crocea;NA;0.059;NA;0.99999999999738;  
MN143402;Lepidoptera;Lasiommata megera;Lasiommata megera;1;Lasiommata megera;0.999806890129977;  
MN143404;Lepidoptera;Thymelicus lineola;Thymelicus lineola;1;Thymelicus lineola;0.999997391180777;  
MN143405;Lepidoptera;Erebia nivalis;NA;NA;NA;0.999999999999947;  
MN143406;Lepidoptera;Lycaena virgaureae;NA;0.186;Lycaena virgaureae;0.999491227342155;  
MN143407;Lepidoptera;Coenonympha oedippus;Coenonympha oedippus;1;Coenonympha oedippus;0.99999999999784;  
MN143409;Lepidoptera;Lampides boeticus;Lampides boeticus;1;Lampides boeticus;0.9999999876789;  
MN143410;Lepidoptera;Aphantopus hyperantus;Aphantopus hyperantus;0.004;Aphantopus hyperantus;0.999598909345147;  
MN143411;Lepidoptera;Hipparchia fagi;NA;NA;Hipparchia fagi;0.958291584360022;  
MN143412;Lepidoptera;Lycaena phlaeas;Lycaena phlaeas;1;Lycaena phlaeas;0.99999996654253;  
MN143413;Lepidoptera;Polyommatus daphnis;Polyommatus daphnis;1;Polyommatus daphnis;0.99989331516623;  
MN143414;Lepidoptera;Aglais urticae;NA;0.002;Aglais urticae;0.987497593219019;  
MN143418;Lepidoptera;Maniola jurtina;NA;0.001;Maniola jurtina;0.939220105860875;  
MN143419;Lepidoptera;Nymphalis io;NA;0.491;Aglais io;0.930153237246992;  
MN143421;Lepidoptera;Coenonympha gardetta;NA;0.32;Coenonympha arcania;0.715629089660113;  
MN143422;Lepidoptera;Colias alfacariensis;Colias alfacariensis;0.001;Colias alfacariensis;0.999926026317526;  
MN143423;Lepidoptera;Anthocharis cardamines;Anthocharis cardamines;1;Anthocharis cardamines;0.99999984875757;  
MN143424;Lepidoptera;Melitaea nevadensis;Melitaea celadussa;0.999;Melitaea celadussa;0.998819206090668;  
MN143425;Lepidoptera;Lasiommata maera;Lasiommata maera;1;Lasiommata maera;0.99999510792253;  
MN143426;Lepidoptera;Hipparchia statilinus;Hipparchia statilinus;1;Hipparchia statilinus;0.999999999999943;  
MN143432;Lepidoptera;Hipparchia fagi;NA;NA;Hipparchia fagi;0.958291584360022;  
MN143434;Lepidoptera;Aricia cramera;Aricia cramera;1;Aricia cramera;0.99999731037033;  
MN143435;Lepidoptera;Argynnis aglaja;NA;NA;NA;0.999999999998051;  
MN143437;Lepidoptera;Erebia meolans;Erebia meolans;NA;Erebia meolans;0.998803868465943;  
MN143441;Lepidoptera;Melitaea parthenoides;Melitaea parthenoides;1;Melitaea parthenoides;0.999999968152765;  
MN143443;Lepidoptera;Aricia artaxerxes;NA;0.369;Aricia artaxerxes;0.999875393852567;  
MN143444;Lepidoptera;Nymphalis c-album;NA;0.215;NA;0.999999192918557;  
MN143446;Lepidoptera;Hipparchia semele;NA;0.002;Hipparchia semele;0.884496495873109;  
MN143447;Lepidoptera;Iolana iolas;Iolana iolas;1;Iolana iolas;0.999997520975743;  
MN143448;Lepidoptera;Lasiommata megera;Lasiommata megera;1;Lasiommata megera;0.999928528239676;  
MN143449;Lepidoptera;Nymphalis c-album;NA;0.215;NA;0.999999192918557;

MN143451;Lepidoptera;Melitaea didyma;Melitaea didyma;0.002;Melitaea didyma;0.993980744397441;  
MN143452;Lepidoptera;Polyommatus icarus;Polyommatus icarus;0.001;Polyommatus  
icarus;0.999851522482238;  
MN143453;Lepidoptera;Euphydryas maturna;NA;0.126;Euphydryas maturna;0.885705216462044;  
MN143454;Lepidoptera;Coenonympha oedippus;Coenonympha oedippus;1;Coenonympha  
oedippus;0.99999999998664;  
MN143457;Lepidoptera;Plebejus argus;NA;0.123;Plebejus argus;0.980927835351298;  
MN143460;Lepidoptera;Boloria thore;Boloria thore;1;Boloria thore;0.9999987376814;  
MN143461;Lepidoptera;Aricia artaxerxes;NA;0.001;Aricia artaxerxes;0.999246506715116;  
MN143463;Lepidoptera;Chazara briseis;Chazara briseis;1;Chazara briseis;0.999975731693442;  
MN143468;Lepidoptera;Colias palaeno;NA;NA;NA;0.99999998051059;  
MN143469;Lepidoptera;Pyrgus armoricanus;Pyrgus armoricanus;1;Pyrgus  
armoricanus;0.999995317404334;  
MN143470;Lepidoptera;Aricia eumedon;Eumedonia eumedon;0.002;Eumedonia eumedon;0.997793024117892;  
MN143471;Lepidoptera;Melitaea diamina;NA;0.149;Melitaea diamina;0.99999996592464;  
MN143472;Lepidoptera;Coenonympha pamphilus;Coenonympha pamphilus;1;Coenonympha  
pamphilus;0.99999999999744;  
MN143473;Lepidoptera;Euphydryas aurinia;Euphydryas aurinia;0.016;Euphydryas  
aurinia;0.997751503369639;  
MN143474;Lepidoptera;Hipparchia hermione;NA;NA;NA;0.999999999999991;  
MN143475;Lepidoptera;Aporia crataegi;NA;NA;Aporia crataegi;0.999998459680561;  
MN143476;Lepidoptera;Fabriciana niobe;NA;0.005;Fabriciana niobe;0.992125835358755;  
MN143477;Lepidoptera;Cupido osiris;Cupido osiris;1;Cupido osiris;0.99999934982414;  
MN143478;Lepidoptera;Anthocharis cardamines;Anthocharis cardamines;1;Anthocharis  
cardamines;0.9999997953563;  
MN143479;Lepidoptera;Euphydryas aurinia;NA;0.31;Euphydryas aurinia;0.993387708761386;  
MN143480;Lepidoptera;Lasiommata megera;Lasiommata megera;1;Lasiommata megera;0.999928528239676;  
MN143481;Lepidoptera;Colias alfacariensis;Colias alfacariensis;0.001;Colias  
alfacariensis;0.999926026317526;  
MN143482;Lepidoptera;Apatura iris;Apatura iris;1;Apatura iris;0.999999999999972;  
MN143483;Lepidoptera;Agriades glandon;NA;NA;Agriades glandon;0.992759035231148;  
MN143484;Lepidoptera;Aphantopus hyperantus;Aphantopus hyperantus;0.004;Aphantopus  
hyperantus;0.999999007149294;  
MN143485;Lepidoptera;Melitaea nevadensis;NA;0.016;Melitaea celadussa;0.727164742336627;  
MN143486;Lepidoptera;Nymphalis c-album;NA;0.217;NA;0.999999558609054;  
MN143489;Lepidoptera;Erynnis tages;Erynnis tages;1;Erynnis tages;0.999955880826156;  
MN143490;Lepidoptera;Boloria titania;Boloria titania;0.001;Boloria titania;0.99983358374111;  
MN143492;Lepidoptera;Pyrgus cacaliae;Pyrgus cacaliae;0.001;Pyrgus cacaliae;0.99354498208327;  
MN143493;Lepidoptera;Hipparchia fagi;NA;NA;Hipparchia fagi;0.958291584360022;  
MN143495;Lepidoptera;Thymelicus sylvestris;NA;0.324;Thymelicus sylvestris;0.999940778442454;  
MN143496;Lepidoptera;Brenthis ino;Brenthis ino;0.012;Brenthis ino;0.991020837030401;  
MN143498;Lepidoptera;Satyrium spini;Satyrium spini;1;Satyrium spini;0.999999856409385;  
MN143502;Lepidoptera;Maniola cecilia;Pyronia cecilia;1;Pyronia cecilia;1;  
MN143503;Lepidoptera;Satyrium ilicis;Satyrium ilicis;1;Satyrium ilicis;0.99999963901758;  
MN143504;Lepidoptera;Colias crocea;NA;0.059;NA;0.99999999999738;  
MN143507;Lepidoptera;Callophrys rubi;NA;0.001;Callophrys rubi;0.99870518510598;  
MN143508;Lepidoptera;Parnassius apollo;Parnassius apollo;1;Parnassius apollo;0.992704703916692;  
MN143509;Lepidoptera;Callophrys rubi;NA;0.001;Callophrys rubi;0.997583226008279;  
MN143510;Lepidoptera;Gonepteryx rhamni;Gonepteryx rhamni;1;Gonepteryx rhamni;0.999673119534565;  
MN143512;Lepidoptera;Polyommatus celina;Polyommatus celina;0.001;Polyommatus  
celina;0.99999999717033;  
MN143513;Lepidoptera;Anthocharis cardamines;Anthocharis cardamines;1;Anthocharis  
cardamines;0.99999933384063;  
MN143514;Lepidoptera;Melitaea nevadensis;NA;0.001;NA;0.999999999891422;  
MN143515;Lepidoptera;Heteropterus morpheus;NA;NA;Heteropterus morpheus;0.99999999999886;  
MN143518;Lepidoptera;Erebia euryale;NA;NA;Erebia euryale;0.919518760623792;  
MN143519;Lepidoptera;Argynnis aglaja;NA;0.002;Speyeria aglaja;0.87239079736947;  
MN143520;Lepidoptera;Cupido minimus;NA;0.01;Cupido minimus;0.999822522018942;  
MN143521;Lepidoptera;Argynnis paphia;Argynnis paphia;1;Argynnis paphia;0.999999991389927;  
MN143523;Lepidoptera;Coenonympha arcania;NA;0.062;Coenonympha arcania;0.984995921079476;  
MN143524;Lepidoptera;Vanessa cardui;Vanessa cardui;1;Vanessa cardui;0.999999459983318;  
MN143525;Lepidoptera;Polyommatus daphnis;Polyommatus daphnis;1;Polyommatus  
daphnis;0.999912123473843;  
MN143526;Lepidoptera;Gonepteryx rhamni;Gonepteryx rhamni;1;Gonepteryx rhamni;0.999673119534565;  
MN143527;Lepidoptera;Lasiommata megera;Lasiommata megera;1;Lasiommata megera;0.999379144055441;  
MN143531;Lepidoptera;Polyommatus icarus;Polyommatus icarus;0.001;Polyommatus  
icarus;0.986810340260722;  
MN143532;Lepidoptera;Polyommatus icarus;NA;0.001;Polyommatus icarus;0.96905816849887;  
MN143533;Lepidoptera;Aricia agestis;NA;0.253;Aricia agestis;0.996350017387504;  
MN143534;Lepidoptera;Ochlodes sylvanus;NA;0.316;Ochlodes sylvanus;0.996318754838625;  
MN143535;Lepidoptera;Fabriciana niobe;NA;0.005;Fabriciana niobe;0.992125835358755;  
MN143536;Lepidoptera;Fabriciana adippe;NA;NA;Fabriciana adippe;0.900255826442102;  
MN143537;Lepidoptera;Pieris napi;NA;0.028;Pieris napi;0.888205720664699;  
MN143538;Lepidoptera;Polyommatus icarus;NA;0.166;Polyommatus icarus;0.749935576218847;  
MN143542;Lepidoptera;Aglais urticae;NA;0.002;Aglais urticae;0.987497593219019;  
MN143543;Lepidoptera;Lasiommata maera;Lasiommata maera;1;Lasiommata maera;0.999997484701547;  
MN143544;Lepidoptera;Hipparchia hermione;Hipparchia hermione;NA;Hipparchia  
hermione;0.859032014866585;

MN143546;Lepidoptera;Brenthis hecate;NA;0.072;Brenthis hecate;0.999803056289114;  
MN143547;Lepidoptera;Lasiommata megera;Lasiommata megera;1;Lasiommata megera;0.999928528239676;  
MN143549;Lepidoptera;Cupido minimus;NA;0.006;Cupido minimus;0.999768371759258;  
MN143550;Lepidoptera;Ochlodes sylvanus;NA;0.119;Ochlodes sylvanus;0.997373902608318;  
MN143551;Lepidoptera;Pyrgus andromedae;Pyrgus andromedae;0.001;Pyrgus  
andromedae;0.998828669843251;  
MN143552;Lepidoptera;Thymelicus lineola;Thymelicus lineola;1;Thymelicus  
lineola;0.999971535093703;  
MN143553;Lepidoptera;Thymelicus lineola;Thymelicus lineola;1;Thymelicus  
lineola;0.999995927238524;  
MN143554;Lepidoptera;Lasiommata megera;Lasiommata megera;1;Lasiommata megera;0.999379144055441;  
MN143555;Lepidoptera;Pyrgus cacaliae;Pyrgus cacaliae;0.001;Pyrgus cacaliae;0.986004413030866;  
MN143557;Lepidoptera;Plebejus argus;Plebejus argus;0.014;Plebejus argus;0.985827082916227;  
MN143558;Lepidoptera;Melitaea didyma;Melitaea didyma;1;Melitaea didyma;0.99958019737737;  
MN143559;Lepidoptera;Thymelicus lineola;Thymelicus lineola;1;Thymelicus  
lineola;0.999995927238524;  
MN143561;Lepidoptera;Lycaena phlaeas;Lycaena phlaeas;1;Lycaena phlaeas;0.999999996363186;  
MN143562;Lepidoptera;Nymphalis egea;Polygonia egea;1;Polygonia egea;0.999998717078994;  
MN143563;Lepidoptera;Coenonympha pamphilus;Coenonympha pamphilus;1;Coenonympha  
pamphilus;0.999999999999744;  
MN143566;Lepidoptera;Coenonympha corinna;Coenonympha corinna;1;Coenonympha  
corinna;0.99999999984936;  
MN143567;Lepidoptera;Aricia cramera;Aricia cramera;1;Aricia cramera;0.999995777202847;  
MN143569;Lepidoptera;Argynnis aglaja;NA;0.032;Speyeria aglaja;0.711214130939604;  
MN143570;Lepidoptera;Thymelicus lineola;Thymelicus lineola;1;Thymelicus  
lineola;0.999997596482064;  
MN143572;Lepidoptera;Carcharodus alceae;Carcharodus alceae;1;Carcharodus  
alceae;0.999999998465938;  
MN143576;Lepidoptera;Polyommatus thersites;Polyommatus thersites;0.001;Polyommatus  
thersites;0.999999937179697;  
MN143577;Lepidoptera;Hipparchia hermione;Hipparchia hermione;1;Hipparchia  
hermione;0.999791304970896;  
MN143578;Lepidoptera;Pieris napi;NA;0.066;Pieris napi;0.832895481558215;  
MN143582;Lepidoptera;Lasiommata megera;Lasiommata megera;1;Lasiommata megera;0.999379144055441;  
MN143583;Lepidoptera;Hipparchia hermione;NA;NA;NA;0.999999999999991;  
MN143584;Lepidoptera;Lasiommata megera;Lasiommata megera;0.001;Lasiommata  
megera;0.999948619277393;  
MN143585;Lepidoptera;Aglais urticae;NA;0.002;Aglais urticae;0.987497593219019;  
MN143586;Lepidoptera;Colias alfacariensis;Colias alfacariensis;0.001;Colias  
alfacariensis;0.999926026317526;  
MN143587;Lepidoptera;Hipparchia semele;NA;0.002;Hipparchia semele;0.786432437784155;  
MN143590;Lepidoptera;Erynnis tages;Erynnis tages;1;Erynnis tages;0.999993015645406;  
MN143591;Lepidoptera;Erebia medusa;NA;0.009;Erebia medusa;0.986275612856827;  
MN143592;Lepidoptera;Satyrium esculi;Satyrium esculi;1;Satyrium esculi;0.999999957367948;  
MN143593;Lepidoptera;Lycaena virgaureae;NA;0.067;Lycaena virgaureae;0.999579233710412;  
MN143594;Lepidoptera;Pyrgus malvoides;NA;0.176;Pyrgus malvoides;0.940490890379026;  
MN143595;Lepidoptera;Pieris napi;NA;0.008;Pieris napi;0.840314219469586;  
MN143596;Lepidoptera;Lycaena phlaeas;Lycaena phlaeas;1;Lycaena phlaeas;0.999999996363186;  
MN143597;Lepidoptera;Satyrium acaciae;Satyrium acaciae;1;Satyrium acaciae;0.999999147683661;  
MN143601;Lepidoptera;Polyommatus icarus;NA;0.166;Polyommatus icarus;0.749935576218847;  
MN143603;Lepidoptera;Thymelicus lineola;Thymelicus lineola;1;Thymelicus  
lineola;0.999995927238524;  
MN143604;Lepidoptera;Carcharodus alceae;Carcharodus alceae;NA;Carcharodus  
alceae;0.999999993849485;  
MN143605;Lepidoptera;Maniola jurtina;NA;0.001;Maniola jurtina;0.939220105860875;  
MN143607;Lepidoptera;Aricia eumedon;Eumedonia eumedon;0.001;Eumedonia eumedon;0.997362661323557;  
MN143608;Lepidoptera;Lasiommata megera;Lasiommata megera;1;Lasiommata megera;0.999379144055441;  
MN143609;Lepidoptera;Thymelicus sylvestris;Thymelicus sylvestris;1;Thymelicus  
sylvestris;0.99999985935205;  
MN143610;Lepidoptera;Nymphalis c-album;NA;0.215;NA;0.999999192918557;  
MN143611;Lepidoptera;Aricia cramera;Aricia cramera;1;Aricia cramera;0.999990596811572;  
MN143613;Lepidoptera;Aricia artaxerxes;NA;0.001;Aricia artaxerxes;0.999246506715116;  
MN143615;Lepidoptera;Polyommatus icarus;Polyommatus icarus;0.002;Polyommatus  
icarus;0.998574121742404;  
MN143617;Lepidoptera;Polyommatus celina;Polyommatus celina;0.009;Polyommatus  
celina;0.99999999949694;  
MN143618;Lepidoptera;Aphantopus hyperantus;Aphantopus hyperantus;0.006;Aphantopus  
hyperantus;0.999998615504572;  
MN143619;Lepidoptera;Argynnis paphia;Argynnis paphia;1;Argynnis paphia;0.999999991389927;  
MN143620;Lepidoptera;Aricia artaxerxes;NA;0.139;Aricia artaxerxes;0.999594219786776;  
MN143621;Lepidoptera;Pyrgus malvae;Pyrgus malvae;0.999;Pyrgus malvae;0.993531783407179;  
MN143622;Lepidoptera;Melitaea cinxia;Melitaea cinxia;1;Melitaea cinxia;0.99999999999801;  
MN143623;Lepidoptera;Carterocephalus palaemon;NA;0.052;Carterocephalus  
palaemon;0.728445051795325;  
MN143627;Lepidoptera;Hyponephele lycaon;Hyponephele lycaon;1;Hyponephele  
lycaon;0.9999999965911;  
MN143628;Lepidoptera;Aricia eumedon;Eumedonia eumedon;0.002;Eumedonia eumedon;0.997889493083971;

MN143629;Lepidoptera;Lasiommata paramegaera;Lasiommata paramegaera;0.999;Lasiommata  
 paramegaera;0.995283446287531;  
 MN143630;Lepidoptera;Erebia melampus;Erebia melampus;NA;Erebia melampus;0.956527193782019;  
 MN143631;Lepidoptera;Pyrgus malvoides;NA;0.176;Pyrgus malvoides;0.940490890379026;  
 MN143632;Lepidoptera;Cupido minimus;NA;0.001;Cupido minimus;0.999420080317202;  
 MN143633;Lepidoptera;Melitaea nevadensis;NA;0.005;Melitaea celadussa;0.873944840950458;  
 MN143634;Lepidoptera;Anthocharis cardamines;Anthocharis cardamines;1;Anthocharis  
 cardamines;0.999999986709838;  
 MN143635;Lepidoptera;Pyrgus carlinae;NA;NA;Pyrgus carlinae;0.912467021237514;  
 MN143636;Lepidoptera;Thymelicus lineola;Thymelicus lineola;1;Thymelicus  
 lineola;0.999971535093703;  
 MN143640;Lepidoptera;Pieris napi;NA;0.028;Pieris napi;0.888205720664699;  
 MN143641;Lepidoptera;Erebia meolans;Erebia meolans;NA;Erebia meolans;0.999880195584624;  
 MN143642;Lepidoptera;Vanessa cardui;Vanessa cardui;1;Vanessa cardui;0.999999459983318;  
 MN143643;Lepidoptera;Polyommatus icarus;NA;0.001;Polyommatus icarus;0.981285528541973;  
 MN143644;Lepidoptera;Vanessa cardui;Vanessa cardui;1;Vanessa cardui;0.999999459983318;  
 MN143645;Lepidoptera;Polyommatus daphnis;Polyommatus daphnis;1;Polyommatus  
 daphnis;0.99977716269156;  
 MN143647;Lepidoptera;Erebia melampus;Erebia melampus;0.011;Erebia melampus;0.975499903768874;  
 MN143649;Lepidoptera;Cupido alcetas;NA;0.218;Cupido alcetas;0.833501983138177;  
 MN143650;Lepidoptera;Ochlodes sylvanus;NA;0.316;Ochlodes sylvanus;0.996318754838625;  
 MN143651;Lepidoptera;Vanessa cardui;Vanessa cardui;1;Vanessa cardui;0.999999459983318;  
 MN143652;Lepidoptera;Brenthis ino;Brenthis ino;0.998;Brenthis ino;0.990926326543065;  
 MN143656;Lepidoptera;Fabriciana adippe;Fabriciana adippe;0.007;Fabriciana  
 adippe;0.876018745965171;  
 MN143657;Lepidoptera;Pieris napi;NA;0.09;Pieris napi;0.817490066759453;  
 MN143659;Lepidoptera;Pyrgus armoricanus;Pyrgus armoricanus;1;Pyrgus  
 armoricanus;0.999997353848817;  
 MN143660;Lepidoptera;Cupido minimus;NA;0.006;Cupido minimus;0.999768371759258;  
 MN143661;Lepidoptera;Vanessa cardui;Vanessa cardui;1;Vanessa cardui;0.999999459983318;  
 MN143662;Lepidoptera;Lycaena tityrus;Lycaena tityrus;1;Lycaena tityrus;0.99998928238034;  
 MN143663;Lepidoptera;Maniola jurtina;NA;0.038;NA;0.99999999999524;  
 MN143664;Lepidoptera;Argynnis aglaja;NA;0.002;Speyeria aglaja;0.939596179524242;  
 MN143665;Lepidoptera;Arethusana arethusana;NA;0.153;Arethusana arethusana;0.999652039046744;  
 MN143666;Lepidoptera;Maniola jurtina;NA;0.001;Maniola jurtina;0.939220105860875;  
 MN143667;Lepidoptera;Hipparchia fidia;Hipparchia fidia;1;Hipparchia fidia;1;  
 MN143668;Lepidoptera;Coenonympha pamphilus;Coenonympha pamphilus;1;Coenonympha  
 pamphilus;0.999999999999716;  
 MN143669;Lepidoptera;Colias crocea;NA;0.059;NA;0.999999999999738;  
 MN143670;Lepidoptera;Maniola jurtina;NA;NA;Maniola jurtina;0.949988160645333;  
 MN143671;Lepidoptera;Ochlodes sylvanus;NA;0.316;Ochlodes sylvanus;0.996318754838625;  
 MN143672;Lepidoptera;Erynnis tages;Erynnis tages;1;Erynnis tages;0.999999281987018;  
 MN143673;Lepidoptera;Anthocharis euphenoides;NA;0.057;Anthocharis euphenoides;0.971022337943165;  
 MN143675;Lepidoptera;Thymelicus lineola;Thymelicus lineola;1;Thymelicus  
 lineola;0.999997391180777;  
 MN143677;Lepidoptera;Maniola jurtina;NA;0.012;Maniola jurtina;0.91755716175482;  
 MN143678;Lepidoptera;Lasiommata paramegaera;Lasiommata paramegaera;0.999;Lasiommata  
 paramegaera;0.995283446287531;  
 MN143679;Lepidoptera;Ochlodes sylvanus;NA;0.121;Ochlodes sylvanus;0.997242099793337;  
 MN143681;Lepidoptera;Melitaea cinxia;Melitaea cinxia;1;Melitaea cinxia;0.999999999999631;  
 MN143682;Lepidoptera;Argynnis paphia;Argynnis paphia;1;Argynnis paphia;0.99999991389927;  
 MN143683;Lepidoptera;Pyrgus carlinae;NA;NA;Pyrgus carlinae;0.854199018204849;  
 MN143684;Lepidoptera;Polyommatus daphnis;Polyommatus daphnis;1;Polyommatus  
 daphnis;0.999874472754722;  
 MN143685;Lepidoptera;Thymelicus lineola;Thymelicus lineola;1;Thymelicus  
 lineola;0.999971535093703;  
 MN143686;Lepidoptera;Melitaea didyma;Melitaea didyma;1;Melitaea didyma;0.999429129005203;  
 MN143687;Lepidoptera;Polyommatus thersites;Polyommatus thersites;0.001;Polyommatus  
 thersites;0.999999937179697;  
 MN143690;Lepidoptera;Polyommatus daphnis;Polyommatus daphnis;1;Polyommatus  
 daphnis;0.999882469267824;  
 MN143691;Lepidoptera;Celastrina argiolus;Celastrina argiolus;1;Celastrina  
 argiolus;0.999527385150531;  
 MN143692;Lepidoptera;Satyrium ilicis;Satyrium ilicis;1;Satyrium ilicis;0.999999987901305;  
 MN143694;Lepidoptera;Coenonympha glycerion;NA;0.284;Coenonympha glycerion;0.999998676061348;  
 MN143695;Lepidoptera;Maniola jurtina;NA;0.159;NA;0.999999999997465;  
 MN143696;Lepidoptera;Maniola jurtina;NA;0.001;Maniola jurtina;0.954920841585594;  
 MN143697;Lepidoptera;Hipparchia fagi;Hipparchia fagi;NA;Hipparchia fagi;0.962096851442989;  
 MN143698;Lepidoptera;Aricia agestis;NA;0.067;Aricia agestis;0.999509743227786;  
 MN143699;Lepidoptera;Argynnis aglaja;NA;NA;Speyeria aglaja;0.872991147917853;  
 MN143700;Lepidoptera;Aglais urticae;NA;0.001;Aglais urticae;0.9870506994812;  
 MN143703;Lepidoptera;Scolitantides orion;Scolitantides orion;1;Scolitantides  
 orion;0.999999976046894;  
 MN143704;Lepidoptera;Issoria lathonia;Issoria lathonia;1;Issoria lathonia;0.999999999989257;  
 MN143707;Lepidoptera;Erebia mnestræ;Erebia mnestræ;0.002;Erebia mnestræ;0.999845899963913;  
 MN143708;Lepidoptera;Melitaea cinxia;Melitaea cinxia;1;Melitaea cinxia;0.999999999999403;  
 MN143709;Lepidoptera;Pyrgus malvoides;NA;0.176;Pyrgus malvoides;0.940490890379026;  
 MN143710;Lepidoptera;Colias crocea;NA;0.059;NA;0.999999999999738;

MN143711;Lepidoptera;Thymelicus sylvestris;Thymelicus sylvestris;1;Thymelicus sylvestris;0.99999981568351;  
MN143712;Lepidoptera;Erynnis tages;Erynnis tages;1;Erynnis tages;0.99999874283082;  
MN143713;Lepidoptera;Pyrgus malvoides;NA;0.032;Pyrgus malvoides;0.942851267343214;  
MN143714;Lepidoptera;Lycaena tityrus;Lycaena tityrus;1;Lycaena tityrus;0.999998928238034;  
MN143716;Lepidoptera;Lasiommata megera;Lasiommata megera;1;Lasiommata megera;0.999379144055441;  
MN143717;Lepidoptera;Fabriciana niobe;Fabriciana niobe;0.001;Fabriciana niobe;0.991782234294744;  
MN143718;Lepidoptera;Lasiommata megera;Lasiommata megera;1;Lasiommata megera;0.999379144055441;  
MN143720;Lepidoptera;Erebia oeme;NA;0.134;Erebia oeme;0.99999998288445;  
MN143721;Lepidoptera;Coenonympha glycerion;NA;0.153;Coenonympha glycerion;0.99999865379132;  
MN143723;Lepidoptera;Maniola jurtina;NA;0.012;Maniola jurtina;0.91755716175482;  
MN143724;Lepidoptera;Erebia medusa;NA;0.009;Erebia medusa;0.986275612856827;  
MN143725;Lepidoptera;Aporia crataegi;NA;NA;Aporia crataegi;0.999998459680561;  
MN143726;Lepidoptera;Hipparchia hermione;Hipparchia hermione;1;Hipparchia hermione;0.999836798673417;  
MN143727;Lepidoptera;Maniola jurtina;NA;NA;NA;0.9999999985062;  
MN143728;Lepidoptera;Pyrgus armoricanus;Pyrgus armoricanus;1;Pyrgus armoricanus;0.999998167110024;  
MN143729;Lepidoptera;Hipparchia statilinus;Hipparchia statilinus;1;Hipparchia statilinus;0.99999999999773;  
MN143730;Lepidoptera;Cupido minimus;NA;0.009;Cupido minimus;0.999791453712643;  
MN143731;Lepidoptera;Hipparchia neapolitana;NA;0.001;Hipparchia semele;0.79973788162839;  
MN143732;Lepidoptera;Pyrgus foulquieri;NA;0.001;NA;0.99999999985431;  
MN143733;Lepidoptera;Nymphalis io;NA;0.491;Aglais io;0.930153237246992;  
MN143734;Lepidoptera;Thymelicus lineola;Thymelicus lineola;1;Thymelicus lineola;0.999987349868469;  
MN143735;Lepidoptera;Callophrys rubi;NA;0.001;Callophrys rubi;0.99870518510598;  
MN143736;Lepidoptera;Carcharodus alceae;Carcharodus alceae;1;Carcharodus alceae;0.99999998465938;  
MN143737;Lepidoptera;Cupido minimus;NA;0.006;Cupido minimus;0.999768371759258;  
MN143738;Lepidoptera;Boloria euphrosyne;Boloria euphrosyne;1;Boloria euphrosyne;0.999999849008458;  
MN143739;Lepidoptera;Thymelicus lineola;Thymelicus lineola;1;Thymelicus lineola;0.999996928209697;  
MN143740;Lepidoptera;Maniola jurtina;NA;0.038;NA;0.99999999999524;  
MN143742;Lepidoptera;Ochlodes sylvanus;NA;0.108;Ochlodes sylvanus;0.996827249893169;  
MN143743;Lepidoptera;Pyrgus armoricanus;Pyrgus armoricanus;1;Pyrgus armoricanus;0.999997353848817;  
MN143746;Lepidoptera;Nymphalis c-album;NA;0.215;NA;0.999999192918557;  
MN143747;Lepidoptera;Carcharodus alceae;Carcharodus alceae;1;Carcharodus alceae;0.99999998465938;  
MN143750;Lepidoptera;Pyrgus serratulae;Pyrgus serratulae;1;Pyrgus serratulae;0.9999989567508;  
MN143751;Lepidoptera;Lasiommata paramegaera;Lasiommata paramegaera;0.999;Lasiommata paramegaera;0.999036370042363;  
MN143752;Lepidoptera;Aricia agestis;NA;0.069;Aricia agestis;0.995918114091591;  
MN143753;Lepidoptera;Melitaea nevadensis;NA;0.001;NA;0.99999999896095;  
MN143754;Lepidoptera;Plebejus argus;NA;0.108;Plebejus argus;0.968558607851385;  
MN143755;Lepidoptera;Polyommatus thersites;Polyommatus thersites;0.002;Polyommatus thersites;0.99999884744916;  
MN143756;Lepidoptera;Callophrys avis;Callophrys avis;1;Callophrys avis;0.992335035373355;  
MN143757;Lepidoptera;Maniola jurtina;NA;0.012;Maniola jurtina;0.91755716175482;  
MN143759;Lepidoptera;Cupido minimus;NA;0.001;Cupido minimus;0.999803920701362;  
MN143760;Lepidoptera;Polyommatus icarus;NA;0.003;Polyommatus icarus;0.986125651677522;  
MN143761;Lepidoptera;Aglais urticae;NA;0.002;Aglais urticae;0.987497593219019;  
MN143762;Lepidoptera;Vanessa cardui;Vanessa cardui;1;Vanessa cardui;0.99999803450484;  
MN143763;Lepidoptera;Callophrys rubi;Callophrys rubi;0.001;Callophrys rubi;0.998666989630658;  
MN143764;Lepidoptera;Maniola jurtina;NA;0.063;Maniola jurtina;0.972779934096133;  
MN143766;Lepidoptera;Maniola jurtina;NA;0.001;Maniola jurtina;0.939220105860875;  
MN143767;Lepidoptera;Parnassius apollo;Parnassius apollo;1;Parnassius apollo;0.992704703916692;  
MN143771;Lepidoptera;Coenonympha arcania;NA;0.105;NA;0.99999999999971;  
MN143772;Lepidoptera;Maniola jurtina;NA;0.012;Maniola jurtina;0.91755716175482;  
MN143773;Lepidoptera;Hipparchia hermione;NA;NA;Hipparchia hermione;0.704211886045116;  
MN143774;Lepidoptera;Glaucopsyche alexis;Glaucopsyche alexis;0.001;Glaucopsyche alexis;0.94042380088325;  
MN143775;Lepidoptera;Melitaea nevadensis;Melitaea celadussa;0.999;Melitaea celadussa;0.998163187842236;  
MN143776;Lepidoptera;Coenonympha corinna;Coenonympha corinna;1;Coenonympha corinna;0.99999999975955;  
MN143778;Lepidoptera;Gonepteryx rhamni;NA;0.474;Gonepteryx rhamni;0.982076396127858;  
MN143779;Lepidoptera;Lysandra coridon;NA;NA;NA;0.998070184737648;  
MN143780;Lepidoptera;Maniola jurtina;NA;0.012;Maniola jurtina;0.91755716175482;  
MN143781;Lepidoptera;Pyrgus onopordi;Pyrgus onopordi;1;Pyrgus onopordi;0.99999711229755;  
MN143782;Lepidoptera;Agriades glandon;Agriades glandon;0.002;Agriades glandon;0.986765673326777;  
MN143783;Lepidoptera;Aporia crataegi;NA;NA;Aporia crataegi;0.999998459680561;  
MN143784;Lepidoptera;Nymphalis c-album;NA;0.215;NA;0.999999192918557;  
MN143785;Lepidoptera;Lycaena phlaeas;Lycaena phlaeas;1;Lycaena phlaeas;0.9999999959837;  
MN143786;Lepidoptera;Coenonympha arcania;NA;0.002;NA;0.99999999999972;  
MN143787;Lepidoptera;Satyrium acaciae;Satyrium acaciae;1;Satyrium acaciae;0.999999965468391;

MN143788;Lepidoptera;Aricia cramera;Aricia cramera;1;Aricia cramera;0.999993731037033;  
MN143790;Lepidoptera;Ochlodes sylvanus;NA;0.316;Ochlodes sylvanus;0.996318754838625;  
MN143791;Lepidoptera;Erebia pronoe;Erebia pronoe;1;Erebia pronoe;0.999250891771858;  
MN143794;Lepidoptera;Lycaena phlaeas;Lycaena phlaeas;1;Lycaena phlaeas;0.99999996363186;  
MN143795;Lepidoptera;Aglais urticae;Aglais urticae;0.001;Aglais urticae;0.994396335177485;  
MN143796;Lepidoptera;Maniola jurtina;NA;0.001;Maniola jurtina;0.939220105860875;  
MN143797;Lepidoptera;Satyrium w-album;NA;0.056;Satyrium w-album;0.989378230996316;  
MN143799;Lepidoptera;Argynnis paphia;Argynnis paphia;1;Argynnis paphia;0.99999991389927;  
MN143800;Lepidoptera;Thymelicus sylvestris;Thymelicus sylvestris;1;Thymelicus  
sylvestris;0.99999981568351;  
MN143801;Lepidoptera;Plebejus argus;NA;NA;Plebejus argus;0.975554522863115;  
MN143803;Lepidoptera;Boloria euphrosyne;Boloria euphrosyne;1;Boloria  
euphrosyne;0.999998100734827;  
MN143804;Lepidoptera;Aricia artaxerxes;NA;0.001;Aricia artaxerxes;0.999246506715116;  
MN143806;Lepidoptera;Lysandra coridon;NA;NA;NA;0.998346382460118;  
MN143807;Lepidoptera;Lasiommata maera;Lasiommata maera;1;Lasiommata maera;0.99999510792253;  
MN143808;Lepidoptera;Brenthis hecate;NA;0.083;Brenthis hecate;0.999707638996184;  
MN143809;Lepidoptera;Cupido minimus;NA;0.01;Cupido minimus;0.999822522018942;  
MN143810;Lepidoptera;Maniola cecilia;Pyronia cecilia;NA;Pyronia cecilia;1;  
MN143811;Lepidoptera;Aricia agestis;NA;NA;Aricia agestis;0.992523764495753;  
MN143812;Lepidoptera;Callophrys rubi;NA;0.019;Callophrys rubi;0.998201459637982;  
MN143813;Lepidoptera;Iolana iolas;Iolana iolas;1;Iolana iolas;0.999998642388204;  
MN143814;Lepidoptera;Vanessa cardui;Vanessa cardui;1;Vanessa cardui;0.99999459983318;  
MN143816;Lepidoptera;Pyrgus andromedae;Pyrgus andromedae;0.001;Pyrgus  
andromedae;0.998828669843251;  
MN143818;Lepidoptera;Anthocharis damone;Anthocharis damone;1;Anthocharis  
damone;0.99999999146809;  
MN143819;Lepidoptera;Aricia agestis;NA;0.069;Aricia agestis;0.995918114091591;  
MN143820;Lepidoptera;Colias crocea;NA;0.059;NA;0.99999999999738;  
MN143821;Lepidoptera;Maniola jurtina;Maniola jurtina;0.022;Maniola jurtina;0.98767828205167;  
MN143822;Lepidoptera;Ochlodes sylvanus;NA;0.316;Ochlodes sylvanus;0.996318754838625;  
MN143824;Lepidoptera;Brenthis daphne;Brenthis daphne;0.001;Brenthis daphne;0.996209297077896;  
MN143825;Lepidoptera;Lasiommata megera;Lasiommata megera;1;Lasiommata megera;0.999928528239676;  
MN143826;Lepidoptera;Fabriciana adippe;NA;NA;Fabriciana adippe;0.900255826442102;  
MN143827;Lepidoptera;Ochlodes sylvanus;NA;0.316;Ochlodes sylvanus;0.996318754838625;  
MN143829;Lepidoptera;Celastrina argiolus;Celastrina argiolus;1;Celastrina  
argiolus;0.999527385150531;  
MN143830;Lepidoptera;Polyommatus icarus;NA;0.006;Polyommatus icarus;0.997965308245128;  
MN143832;Lepidoptera;Anthocharis damone;Anthocharis damone;1;Anthocharis  
damone;0.999999991170057;  
MN143833;Lepidoptera;Aricia eumedon;Eumedonia eumedon;0.002;Eumedonia eumedon;0.998285932369328;  
MN143834;Lepidoptera;Boloria euphrosyne;Boloria euphrosyne;1;Boloria  
euphrosyne;0.99999888858929;  
MN143836;Lepidoptera;Aricia agestis;NA;0.067;Aricia agestis;0.999509743227786;  
MN143837;Lepidoptera;Pyrgus carthami;Pyrgus carthami;1;Pyrgus carthami;0.999999420497628;  
MN143839;Lepidoptera;Pieris napi;NA;0.011;Pieris napi;0.801985394724814;  
MN143840;Lepidoptera;Satyrium ilicis;Satyrium ilicis;1;Satyrium ilicis;0.999999963901758;  
MN143841;Lepidoptera;Aphantopus hyperantus;Aphantopus hyperantus;0.003;Aphantopus  
hyperantus;0.999999455871523;  
MN143843;Lepidoptera;Aricia agestis;NA;0.067;Aricia agestis;0.999509743227786;  
MN143844;Lepidoptera;Cupido minimus;NA;0.005;Cupido minimus;0.999638915488394;  
MN143845;Lepidoptera;Coenonympha pamphilus;Coenonympha pamphilus;1;Coenonympha  
pamphilus;0.99999999999801;  
MN143846;Lepidoptera;Polyommatus damon;Polyommatus damon;1;Polyommatus damon;0.99999890455973;  
MN143848;Lepidoptera;Gegenes nostrodamus;Gegenes nostrodamus;1;Gegenes  
nostrodamus;0.999999996883645;  
MN143849;Lepidoptera;Favonius quercus;NA;NA;Favonius quercus;0.73046069582187;  
MN143851;Lepidoptera;Brenthis daphne;Brenthis daphne;0.001;Brenthis daphne;0.996209297077896;  
MN143852;Lepidoptera;Nymphalis c-album;NA;0.215;NA;0.999999192918557;  
MN143853;Lepidoptera;Cupido osiris;Cupido osiris;1;Cupido osiris;0.999999791352473;  
MN143855;Lepidoptera;Fabriciana niobe;Fabriciana niobe;0.001;Fabriciana niobe;0.93186202957215;  
MN143857;Lepidoptera;Carterocephalus palaemon;Carterocephalus palaemon;0.013;Carterocephalus  
palaemon;0.802650615099358;  
MN143858;Lepidoptera;Agriades orbitulus;NA;0.01;Agriades orbitulus;0.998991302227708;  
MN143859;Lepidoptera;Lasiommata megera;Lasiommata megera;1;Lasiommata megera;0.999855615819511;  
MN143860;Lepidoptera;Melitaea didyma;Melitaea didyma;1;Melitaea didyma;0.998126427587479;  
MN143861;Lepidoptera;Glaucopsyche melanops;Glaucopsyche melanops;1;Glaucopsyche  
melanops;0.999952924254607;  
MN143862;Lepidoptera;Pyrgus malvoides;NA;0.176;Pyrgus malvoides;0.940490890379026;  
MN143863;Lepidoptera;Hipparchia semele;NA;0.001;Hipparchia semele;0.802446092830354;  
MN143864;Lepidoptera;Pieris napi;NA;0.066;Pieris napi;0.832895481558215;  
MN143865;Lepidoptera;Aricia artaxerxes;NA;0.001;Aricia artaxerxes;0.998546425606378;  
MN143868;Lepidoptera;Boloria euphrosyne;Boloria euphrosyne;1;Boloria  
euphrosyne;0.99999888858929;  
MN143870;Lepidoptera;Polyommatus icarus;Polyommatus icarus;0.001;Polyommatus  
icarus;0.999503294805987;  
MN143871;Lepidoptera;Aglais urticae;Aglais urticae;0.001;Aglais urticae;0.994396335177485;

MN143872;Lepidoptera;Anthocharis cardamines;Anthocharis cardamines;1;Anthocharis cardamines;0.999999940675226;  
MN143873;Lepidoptera;Nymphalis c-album;NA;0.215;NA;0.999999192918557;  
MN143874;Lepidoptera;Maniola jurtina;NA;0.038;NA;0.99999999999524;  
MN143878;Lepidoptera;Vanessa cardui;Vanessa cardui;1;Vanessa cardui;0.999999160346886;  
MN143879;Lepidoptera;Vanessa cardui;Vanessa cardui;1;Vanessa cardui;0.999999459983318;  
MN143881;Lepidoptera;Polyommatus icarus;NA;0.001;Polyommatus icarus;0.981285528541973;  
MN143882;Lepidoptera;Hipparchia fagi;Hipparchia fagi;NA;Hipparchia fagi;0.984844659866066;  
MN143883;Lepidoptera;Gonepteryx cleopatra;Gonepteryx cleopatra;0.998;Gonepteryx cleopatra;0.999118636582266;  
MN143884;Lepidoptera;Pyrgus onopordi;Pyrgus onopordi;1;Pyrgus onopordi;0.999997111229755;  
MN143886;Lepidoptera;Brenthis daphne;Brenthis daphne;0.001;Brenthis daphne;0.996209297077896;  
MN143888;Lepidoptera;Pyrgus malvoides;NA;0.061;Pyrgus malvoides;0.941966564084524;  
MN143889;Lepidoptera;Melitaea didyma;Melitaea didyma;1;Melitaea didyma;0.99958019737737;  
MN143890;Lepidoptera;Pieris napi;NA;NA;Pieris napi;0.860244891707633;  
MN143891;Lepidoptera;Pieris napi;NA;0.012;Pieris napi;0.766698127077765;  
MN143892;Lepidoptera;Lampides boeticus;Lampides boeticus;1;Lampides boeticus;0.9999999876789;  
MN143894;Lepidoptera;Pyrgus armoricanus;Pyrgus armoricanus;1;Pyrgus armoricanus;0.99997353848817;  
MN143896;Lepidoptera;Polyommatus daphnis;NA;0.062;Polyommatus daphnis;0.995724017767077;  
MN143898;Lepidoptera;Aricia agestis;NA;0.253;Aricia agestis;0.996350017387504;  
MN143899;Lepidoptera;Carcharodus baeticus;Carcharodus baeticus;1;Carcharodus baeticus;0.99996739816529;  
MN143901;Lepidoptera;Argynnis aglaja;NA;0.005;Speyeria aglaja;0.896438572419641;  
MN143902;Lepidoptera;Melanargia galathea;Melanargia galathea;NA;Melanargia galathea;0.959429932872284;  
MN143903;Lepidoptera;Nymphalis c-album;NA;0.215;NA;0.999999192918557;  
MN143904;Lepidoptera;Brintesia circe;Brintesia circe;1;Brintesia circe;0.999997995192124;  
MN143906;Lepidoptera;Hipparchia statilinus;Hipparchia statilinus;1;Hipparchia statilinus;0.999999999999517;  
MN143908;Lepidoptera;Thymelicus lineola;Thymelicus lineola;1;Thymelicus lineola;0.999971535093703;  
MN143909;Lepidoptera;Colias alfacariensis;Colias alfacariensis;0.001;Colias alfacariensis;0.999926026317526;  
MN143910;Lepidoptera;Hipparchia statilinus;Hipparchia statilinus;1;Hipparchia statilinus;0.999999999999943;  
MN143911;Lepidoptera;Cupido argiades;NA;0.499;NA;0.999999999984682;  
MN143912;Lepidoptera;Colias crocea;NA;0.059;NA;0.999999999999738;  
MN143914;Lepidoptera;Hipparchia hermione;Hipparchia hermione;1;Hipparchia hermione;0.999791304970896;  
MN143915;Lepidoptera;Nymphalis c-album;NA;0.215;NA;0.999999192918557;  
MN143916;Lepidoptera;Minois dryas;NA;0.025;Minois dryas;0.850746026247397;  
MN143919;Lepidoptera;Melitaea didyma;Melitaea didyma;1;Melitaea didyma;0.999924010019152;  
MN143920;Lepidoptera;Celastrina argiolus;Celastrina argiolus;1;Celastrina argiolus;0.999037794018796;  
MN143921;Lepidoptera;Celastrina argiolus;Celastrina argiolus;1;Celastrina argiolus;0.999527385150531;  
MN143923;Lepidoptera;Hipparchia statilinus;Hipparchia statilinus;1;Hipparchia statilinus;0.999999999999829;  
MN143924;Lepidoptera;Celastrina argiolus;Celastrina argiolus;1;Celastrina argiolus;0.999527385150531;  
MN143925;Lepidoptera;Colias palaeno;NA;0.001;NA;0.999999999983897;  
MN143926;Lepidoptera;Coenonympha pamphilus;Coenonympha pamphilus;1;Coenonympha pamphilus;0.999999999999744;  
MN143927;Lepidoptera;Pyrgus carthami;Pyrgus carthami;1;Pyrgus carthami;0.999998492171898;  
MN143928;Lepidoptera;Pieris napi;NA;0.028;Pieris napi;0.888205720664699;  
MN143929;Lepidoptera;Coenonympha pamphilus;Coenonympha pamphilus;1;Coenonympha pamphilus;0.999999999999744;  
MN143932;Lepidoptera;Celastrina argiolus;Celastrina argiolus;1;Celastrina argiolus;0.999037794018796;  
MN143934;Lepidoptera;Pyrgus carthami;Pyrgus carthami;1;Pyrgus carthami;0.999995592447668;  
MN143935;Lepidoptera;Nymphalis c-album;NA;0.08;NA;0.999996025433302;  
MN143939;Lepidoptera;Melitaea cinxia;Melitaea cinxia;1;Melitaea cinxia;0.999999999999631;  
MN143941;Lepidoptera;Polyommatus thersites;Polyommatus thersites;0.001;Polyommatus thersites;0.99999937179697;  
MN143943;Lepidoptera;Pyrgus foulquieri;NA;NA;Pyrgus alveus;0.827119616974978;  
MN143944;Lepidoptera;Maniola jurtina;NA;0.001;Maniola jurtina;0.939220105860875;  
MN143946;Lepidoptera;Lasioommata maera;Lasioommata maera;1;Lasioommata maera;0.99999510792253;  
MN143947;Lepidoptera;Pyrgus onopordi;Pyrgus onopordi;1;Pyrgus onopordi;0.999997111229755;  
MN143948;Lepidoptera;Anthocharis cardamines;Anthocharis cardamines;1;Anthocharis cardamines;0.999999940675226;  
MN143949;Lepidoptera;Aricia cramera;Aricia cramera;1;Aricia cramera;0.999992229282534;  
MN143952;Lepidoptera;Limenitis camilla;Limenitis camilla;0.003;Limenitis camilla;0.999985572263598;  
MN143953;Lepidoptera;Brenthis daphne;Brenthis daphne;0.001;Brenthis daphne;0.999391395663575;  
MN143954;Lepidoptera;Pieris napi;NA;0.011;Pieris napi;0.801985394724814;  
MN143955;Lepidoptera;Fabriciana adippe;NA;NA;Fabriciana adippe;0.907696205558758;  
MN143956;Lepidoptera;Ochlodes sylvanus;NA;0.316;Ochlodes sylvanus;0.996318754838625;

MN143957;Lepidoptera;Satyrium ilicis;Satyrium ilicis;1;Satyrium ilicis;0.999999987901305;  
MN143958;Lepidoptera;Hipparchia semele;NA;0.001;Hipparchia semele;0.847702896577161;  
MN143959;Lepidoptera;Pyrgus carthami;Pyrgus carthami;1;Pyrgus carthami;0.999997085657879;  
MN143961;Lepidoptera;Plebejus argus;NA;0.095;Plebejus argus;0.975968053247715;  
MN143962;Lepidoptera;Maniola jurtina;NA;NA;Maniola jurtina;0.979166331820534;  
MN143964;Lepidoptera;Fabriciana adippe;NA;NA;Fabriciana adippe;0.857909261199114;  
MN143965;Lepidoptera;Gonepteryx cleopatra;Gonepteryx cleopatra;0.998;Gonepteryx  
cleopatra;0.999118636582266;  
MN143966;Lepidoptera;Hipparchia semele;NA;0.002;Hipparchia semele;0.784603069619426;  
MN143967;Lepidoptera;Lampides boeticus;Lampides boeticus;1;Lampides boeticus;0.99999999545906;  
MN143969;Lepidoptera;Gonepteryx cleopatra;Gonepteryx cleopatra;0.998;Gonepteryx  
cleopatra;0.999118636582266;  
MN143970;Lepidoptera;Polyommatus celina;Polyommatus celina;0.009;Polyommatus  
celina;0.99999998801599;  
MN143971;Lepidoptera;Melitaea nevadensis;NA;0.005;Melitaea celadussa;0.873944840950458;  
MN143972;Lepidoptera;Brintesia circe;Brintesia circe;NA;Brintesia circe;0.99999693487003;  
MN143973;Lepidoptera;Euphydryas aurinia;NA;0.31;Euphydryas aurinia;0.993387708761386;  
MN143975;Lepidoptera;Pieris napi;NA;0.066;Pieris napi;0.832895481558215;  
MN143976;Lepidoptera;Satyrium esculi;Satyrium esculi;1;Satyrium esculi;0.99999957367948;  
MN143978;Lepidoptera;Pyrgus malvoides;NA;0.016;Pyrgus malvoides;0.878050137245322;  
MN143979;Lepidoptera;Thymelicus acteon;Thymelicus acteon;1;Thymelicus acteon;0.9999999752248;  
MN143980;Lepidoptera;Nymphalis c-album;NA;0.08;NA;0.999996025433302;  
MN143982;Lepidoptera;Melitaea didyma;Melitaea didyma;1;Melitaea didyma;0.999879020603494;  
MN143983;Lepidoptera;Pyrgus onopordi;Pyrgus onopordi;1;Pyrgus onopordi;0.999997111229755;  
MN143984;Lepidoptera;Pyrgus malvae;Pyrgus malvae;NA;Pyrgus malvae;0.980121140374433;  
MN143986;Lepidoptera;Melitaea nevadensis;Melitaea celadussa;0.002;Melitaea  
celadussa;0.980709231425815;  
MN143987;Lepidoptera;Plebejus argus;NA;0.095;Plebejus argus;0.975968053247715;  
MN143988;Lepidoptera;Melitaea varia;Melitaea varia;1;Melitaea varia;0.99999105729531;  
MN143989;Lepidoptera;Maniola jurtina;NA;0.005;Maniola jurtina;0.940357663767879;  
MN143992;Lepidoptera;Coenonympha dorus;Coenonympha dorus;1;Coenonympha dorus;0.99999999902371;  
MN143996;Lepidoptera;Melitaea parthenoides;Melitaea parthenoides;1;Melitaea  
parthenoides;0.99999993530452;  
MN143997;Lepidoptera;Lasiommata megera;Lasiommata megera;1;Lasiommata megera;0.999379144055441;  
MN143998;Lepidoptera;Pyrgus malvoides;NA;0.176;Pyrgus malvoides;0.940490890379026;  
MN144001;Lepidoptera;Lasiommata megera;Lasiommata megera;1;Lasiommata megera;0.999928528239676;  
MN144002;Lepidoptera;Melitaea nevadensis;NA;0.011;Melitaea celadussa;0.822617461358457;  
MN144003;Lepidoptera;Lasiommata megera;Lasiommata megera;1;Lasiommata megera;0.99994071989075;  
MN144005;Lepidoptera;Pyrgus malvoides;NA;0.2;Pyrgus malvoides;0.91582520613586;  
MN144006;Lepidoptera;Maniola jurtina;NA;NA;NA;0.9999999985062;  
MN144007;Lepidoptera;Coenonympha arcania;NA;0.002;NA;0.99999999999972;  
MN144008;Lepidoptera;Boloria selene;NA;0.045;Boloria selene;0.99999961027901;  
MN144009;Lepidoptera;Lysandra coridon;NA;NA;NA;0.998017994491822;  
MN144010;Lepidoptera;Plebejus argyrognomon;NA;0.001;NA;0.996064009921404;  
MN144012;Lepidoptera;Melanargia galathea;Melanargia galathea;NA;Melanargia  
galathea;0.987293011345651;  
MN144013;Lepidoptera;Lasiommata megera;Lasiommata megera;1;Lasiommata megera;0.999379144055441;  
MN144014;Lepidoptera;Pyrgus armoricanus;Pyrgus armoricanus;1;Pyrgus  
armoricanus;0.999997353848817;  
MN144017;Lepidoptera;Pieris napi;NA;0.028;Pieris napi;0.888205720664699;  
MN144018;Lepidoptera;Lycaena tityrus;Lycaena tityrus;1;Lycaena tityrus;0.999998928238034;  
MN144019;Lepidoptera;Nymphalis io;NA;0.491;Aglais io;0.930153237246992;  
MN144020;Lepidoptera;Glaucopsyche alexis;Glaucopsyche alexis;0.001;Glaucopsyche  
alexis;0.94042380088325;  
MN144022;Lepidoptera;Maniola jurtina;NA;0.171;Maniola jurtina;0.963697912386445;  
MN144024;Lepidoptera;Aricia cramera;Aricia cramera;1;Aricia cramera;0.999993731037033;  
MN144027;Lepidoptera;Pyrgus onopordi;Pyrgus onopordi;1;Pyrgus onopordi;0.999997111229755;  
MN144028;Lepidoptera;Aglais urticae;NA;0.002;Aglais urticae;0.987497593219019;  
MN144029;Lepidoptera;Fabriciana niobe;NA;0.005;Fabriciana niobe;0.992125835358755;  
MN144030;Lepidoptera;Pyrgus onopordi;Pyrgus onopordi;1;Pyrgus onopordi;0.999997111229755;  
MN144031;Lepidoptera;Gonepteryx rhamni;NA;0.189;Gonepteryx rhamni;0.989643004532712;  
MN144032;Lepidoptera;Maniola jurtina;NA;0.012;Maniola jurtina;0.91755716175482;  
MN144033;Lepidoptera;Hipparchia semele;NA;0.001;Hipparchia semele;0.824269221281445;  
MN144034;Lepidoptera;Melitaea diamina;NA;0.149;Melitaea diamina;0.99999996592464;  
MN144036;Lepidoptera;Polyommatus icarus;NA;0.001;Polyommatus icarus;0.985296983650808;  
MN144037;Lepidoptera;Aricia cramera;Aricia cramera;1;Aricia cramera;0.999993731037033;  
MN144038;Lepidoptera;Melitaea varia;Melitaea varia;1;Melitaea varia;0.999959296681221;  
MN144040;Lepidoptera;Gegenes nostrodamus;Gegenes nostrodamus;1;Gegenes  
nostrodamus;0.99999996883645;  
MN144043;Lepidoptera;Cupido alcetas;NA;0.218;Cupido alcetas;0.833501983138177;  
MN144044;Lepidoptera;Brintesia circe;Brintesia circe;1;Brintesia circe;0.99999951254154;  
MN144046;Lepidoptera;Brintesia circe;Brintesia circe;1;Brintesia circe;0.99999951254154;  
MN144047;Lepidoptera;Thymelicus sylvestris;NA;0.324;Thymelicus sylvestris;0.999940778442454;  
MN144048;Lepidoptera;Pyrgus armoricanus;Pyrgus armoricanus;1;Pyrgus  
armoricanus;0.999997353848817;  
MN144049;Lepidoptera;Colias alfacariensis;Colias alfacariensis;1;Colias  
alfacariensis;0.999944653442302;  
MN144050;Lepidoptera;Aglais urticae;NA;0.055;Aglais urticae;0.993898221214166;



MN144052;Lepidoptera;Polyommatus eros;NA;0.005;Polyommatus eros;0.95275169203039;  
MN144053;Lepidoptera;Melitaea nevadensis;NA;0.003;Melitaea celadussa;0.918635002680887;  
MN144055;Lepidoptera;Carterocephalus palaemon;NA;0.052;Carterocephalus  
palaemon;0.728445051795325;  
MN144056;Lepidoptera;Cupido alcetas;NA;0.218;Cupido alcetas;0.833501983138177;  
MN144057;Lepidoptera;Iolana iolas;Iolana iolas;1;Iolana iolas;0.999998642388204;  
MN144059;Lepidoptera;Polyommatus icarus;NA;0.001;NA;0.999994270558956;  
MN144060;Lepidoptera;Erynnis tages;Erynnis tages;1;Erynnis tages;0.9999614520029;  
MN144062;Lepidoptera;Polyommatus escheri;Polyommatus escheri;1;Polyommatus  
escheri;0.9999999642435;  
MN144063;Lepidoptera;Cupido argiades;NA;0.499;NA;0.99999999984682;  
MN144064;Lepidoptera;Fabriciana adippe;Fabriciana adippe;0.001;Fabriciana  
adippe;0.999538788643547;  
MN144065;Lepidoptera;Carcharodus alceae;Carcharodus alceae;1;Carcharodus  
alceae;0.99999998465938;  
MN144067;Lepidoptera;Nymphalis c-album;NA;0.215;NA;0.999999192918557;  
MN144068;Lepidoptera;Anthocharis cardamines;Anthocharis cardamines;1;Anthocharis  
cardamines;0.9999997953563;  
MN144069;Lepidoptera;Pieris napi;NA;0.011;Pieris napi;0.801985394724814;  
MN144071;Lepidoptera;Lysandra coridon;NA;NA;NA;0.999858116036642;  
MN144072;Lepidoptera;Satyrus ferula;Satyrus ferula;0.013;Satyrus ferula;0.990323965142772;  
MN144073;Lepidoptera;Melitaea varia;Melitaea varia;1;Melitaea varia;0.999998281358841;  
MN144074;Lepidoptera;Gonepteryx cleopatra;Gonepteryx cleopatra;0.998;Gonepteryx  
cleopatra;0.999118636582266;  
MN144076;Lepidoptera;Maniola jurtina;NA;0.012;Maniola jurtina;0.91755716175482;  
MN144077;Lepidoptera;Satyrium ilicis;Satyrium ilicis;1;Satyrium ilicis;0.99999987901305;  
MN144078;Lepidoptera;Aricia agestis;NA;0.03;Aricia agestis;0.999295990875121;  
MN144079;Lepidoptera;Hipparchia semele;NA;NA;Hipparchia semele;0.860254543558736;  
MN144081;Lepidoptera;Celastrina argiolus;Celastrina argiolus;1;Celastrina  
argiolus;0.999527385150531;  
MN144083;Lepidoptera;Brintesia circe;Brintesia circe;1;Brintesia circe;0.999999513984936;  
MN144084;Lepidoptera;Lycaena alciphron;Lycaena alciphron;1;Lycaena alciphron;0.99999928764825;  
MN144085;Lepidoptera;Gonepteryx cleopatra;Gonepteryx cleopatra;0.998;Gonepteryx  
cleopatra;0.999118636582266;  
MN144087;Lepidoptera;Lycaena phlaeas;Lycaena phlaeas;1;Lycaena phlaeas;0.99999996363186;  
MN144089;Lepidoptera;Aricia agestis;NA;0.253;Aricia agestis;0.996350017387504;  
MN144090;Lepidoptera;Lycaena tityrus;Lycaena tityrus;1;Lycaena tityrus;0.999998928238034;  
MN144092;Lepidoptera;Melitaea cinxia;Melitaea cinxia;1;Melitaea cinxia;0.99999999999773;  
MN144093;Lepidoptera;Polyommatus icarus;NA;0.001;Polyommatus icarus;0.981285528541973;  
MN144094;Lepidoptera;Boloria thore;Boloria thore;1;Boloria thore;0.99999998359726;  
MN144095;Lepidoptera;Polyommatus icarus;NA;0.001;Polyommatus icarus;0.963430041979996;  
MN144097;Lepidoptera;Melitaea cinxia;Melitaea cinxia;1;Melitaea cinxia;0.99999999999545;  
MN144098;Lepidoptera;Coenonympha pamphilus;Coenonympha pamphilus;1;Coenonympha  
pamphilus;0.99999999999744;  
MN144099;Lepidoptera;Gonepteryx rhamni;Gonepteryx rhamni;0.008;Gonepteryx  
rhamni;0.999527533936108;  
MN144100;Lepidoptera;Aricia agestis;NA;0.253;Aricia agestis;0.996350017387504;  
MN144103;Lepidoptera;Lycaena thersamon;Lycaena thersamon;0.001;Lycaena  
thersamon;0.952360353045614;  
MN144104;Lepidoptera;Lasiommata megera;Lasiommata megera;1;Lasiommata megera;0.999868597012079;  
MN144107;Lepidoptera;Brintesia circe;Brintesia circe;1;Brintesia circe;0.99999951254154;  
MN144110;Lepidoptera;Polyommatus icarus;NA;0.007;Polyommatus icarus;0.999081737461227;  
MN144111;Lepidoptera;Argynnis paphia;Argynnis paphia;1;Argynnis paphia;0.99999993935262;  
MN144113;Lepidoptera;Nymphalis io;NA;0.491;Aglais io;0.930153237246992;  
MN144114;Lepidoptera;Pyrgus armoricanus;Pyrgus armoricanus;1;Pyrgus  
armoricanus;0.999997353848817;  
MN144116;Lepidoptera;Aricia agestis;NA;0.253;Aricia agestis;0.996350017387504;  
MN144117;Lepidoptera;Lycaena phlaeas;Lycaena phlaeas;1;Lycaena phlaeas;0.99999996363186;  
MN144119;Lepidoptera;Plebejus idas;NA;0.007;NA;0.999546324331549;  
MN144120;Lepidoptera;Pieris napi;NA;0.011;Pieris napi;0.801985394724814;  
MN144121;Lepidoptera;Colias phicomone;NA;0.001;Colias phicomone;0.982746694470566;  
MN144122;Lepidoptera;Hipparchia fidia;Hipparchia fidia;1;Hipparchia fidia;1;  
MN144123;Lepidoptera;Maniola jurtina;NA;0.667;NA;0.99999999940105;  
MN144124;Lepidoptera;Anthocharis euphenoides;NA;0.12;Anthocharis euphenoides;0.931402619863286;  
MN144129;Lepidoptera;Celastrina argiolus;Celastrina argiolus;1;Celastrina  
argiolus;0.999527385150531;  
MN144130;Lepidoptera;Maniola jurtina;NA;NA;Maniola jurtina;0.954562109976986;  
MN144131;Lepidoptera;Nymphalis c-album;NA;0.215;NA;0.999999192918557;  
MN144133;Lepidoptera;Minois dryas;NA;0.025;Minois dryas;0.850746026247397;  
MN144134;Lepidoptera;Nymphalis c-album;NA;0.215;NA;0.999999192918557;  
MN144135;Lepidoptera;Melitaea didyma;Melitaea didyma;0.008;Melitaea didyma;0.989890661413771;  
MN144136;Lepidoptera;Fabriciana niobe;Fabriciana niobe;0.001;Fabriciana niobe;0.93186202957215;  
MN144137;Lepidoptera;Lasiommata megera;Lasiommata megera;1;Lasiommata megera;0.999928528239676;  
MN144138;Lepidoptera;Thymelicus acteon;Thymelicus acteon;1;Thymelicus acteon;0.9999999752248;  
MN144139;Lepidoptera;Lasiommata maera;Lasiommata maera;1;Lasiommata maera;0.99999510792253;  
MN144140;Lepidoptera;Heteropterus morpheus;Heteropterus morpheus;NA;Heteropterus  
morpheus;0.99999999999574;  
MN144141;Lepidoptera;Polyommatus icarus;NA;0.002;Polyommatus icarus;0.998500398404797;

MN144142;Lepidoptera;Thymelicus lineola;Thymelicus lineola;1;Thymelicus lineola;0.999995927238524;  
MN144143;Lepidoptera;Thymelicus sylvestris;Thymelicus sylvestris;1;Thymelicus sylvestris;0.99999985935205;  
MN144144;Lepidoptera;Ochlodes sylvanus;NA;0.316;Ochlodes sylvanus;0.996318754838625;  
MN144145;Lepidoptera;Colias alfacariensis;Colias alfacariensis;0.001;Colias alfacariensis;0.999857790810452;  
MN144149;Lepidoptera;Gonepteryx rhamni;NA;0.487;Gonepteryx rhamni;0.98518357755475;  
MN144150;Lepidoptera;Coenonympha pamphilus;Coenonympha pamphilus;1;Coenonympha pamphilus;0.99999999999744;  
MN144151;Lepidoptera;Vanessa cardui;Vanessa cardui;1;Vanessa cardui;0.99999980896293;  
MN144154;Lepidoptera;Erebia euryale;NA;NA;Erebia euryale;0.919518760623792;  
MN144155;Lepidoptera;Glaucopsyche alexis;Glaucopsyche alexis;0.001;Glaucopsyche alexis;0.94042380088325;  
MN144156;Lepidoptera;Pyrgus onopordi;Pyrgus onopordi;1;Pyrgus onopordi;0.999996661119642;  
MN144158;Lepidoptera;Lycaena tityrus;Lycaena tityrus;1;Lycaena tityrus;0.999998928238034;  
MN144159;Lepidoptera;Brenthis ino;Brenthis ino;1;Brenthis ino;0.999575084556096;  
MN144160;Lepidoptera;Coenonympha arcania;NA;0.062;Coenonympha arcania;0.984995921079476;  
MN144162;Lepidoptera;Maniola jurtina;NA;0.001;Maniola jurtina;0.939220105860875;  
MN144163;Lepidoptera;Euphydryas aurinia;NA;0.31;Euphydryas aurinia;0.993387708761386;  
MN144164;Lepidoptera;Maniola jurtina;NA;0.012;Maniola jurtina;0.91755716175482;  
MN144165;Lepidoptera;Hipparchia hermione;Hipparchia hermione;1;Hipparchia hermione;0.999958999764505;  
MN144166;Lepidoptera;Hipparchia semele;NA;0.002;Hipparchia semele;0.809960747259094;  
MN144167;Lepidoptera;Maniola jurtina;NA;0.012;Maniola jurtina;0.91755716175482;  
MN144169;Lepidoptera;Pyrgus carlinae;NA;NA;Pyrgus carlinae;0.83310343560815;  
MN144170;Lepidoptera;Lysandra coridon;Lysandra coridon;NA;Lysandra coridon;0.735779770406819;  
MN144172;Lepidoptera;Callophrys rubi;NA;0.019;Callophrys rubi;0.998201459637982;  
MN144173;Lepidoptera;Erynnis tages;Erynnis tages;1;Erynnis tages;0.999998856378312;  
MN144175;Lepidoptera;Hipparchia leighebi;Hipparchia leighebi;0.001;Hipparchia leighebi;0.903335109558841;  
MN144177;Lepidoptera;Polyommatus escheri;Polyommatus escheri;1;Polyommatus escheri;0.99999975500856;  
MN144178;Lepidoptera;Erebia pronoe;Erebia pronoe;0.001;Erebia pronoe;0.999412757816713;  
MN144179;Lepidoptera;Pyrgus armoricanus;Pyrgus armoricanus;1;Pyrgus armoricanus;0.999997353848817;  
MN144181;Lepidoptera;Maniola jurtina;NA;0.001;Maniola jurtina;0.939220105860875;  
MN144182;Lepidoptera;Boloria selene;NA;0.098;Boloria selene;0.99999744302163;  
MN144183;Lepidoptera;Maniola jurtina;NA;0.012;Maniola jurtina;0.91755716175482;  
MN144184;Lepidoptera;Pyrgus onopordi;Pyrgus onopordi;1;Pyrgus onopordi;0.999997111229755;  
MN144185;Lepidoptera;Satyrium spini;Satyrium spini;1;Satyrium spini;0.999997876872024;  
MN144188;Lepidoptera;Maniola jurtina;NA;0.001;Maniola jurtina;0.939220105860875;  
MN144190;Lepidoptera;Euphydryas aurinia;Euphydryas aurinia;0.017;Euphydryas aurinia;0.997183742560994;  
MN144191;Lepidoptera;Pyrgus sidae;Pyrgus sidae;1;Pyrgus sidae;0.999994277634217;  
MN144192;Lepidoptera;Hipparchia semele;Hipparchia semele;0.001;Hipparchia semele;0.91773570927243;  
MN144193;Lepidoptera;Gegenes pumilio;Gegenes pumilio;1;Gegenes pumilio;0.999986726679266;  
MN144194;Lepidoptera;Melitaea didyma;Melitaea didyma;1;Melitaea didyma;0.999429129005203;  
MN144195;Lepidoptera;Lasiommata maera;Lasiommata maera;1;Lasiommata maera;0.99999510792253;  
MN144197;Lepidoptera;Boloria euphrosyne;Boloria euphrosyne;1;Boloria euphrosyne;0.999999204024765;  
MN144198;Lepidoptera;Plebejus argyrognomon;NA;0.001;NA;0.994620093546684;  
MN144199;Lepidoptera;Melitaea didyma;Melitaea didyma;NA;Melitaea didyma;0.98069428171586;  
MN144200;Lepidoptera;Aricia agestis;NA;0.253;Aricia agestis;0.996350017387504;  
MN144202;Lepidoptera;Aporia crataegi;Aporia crataegi;NA;0.009;Aporia crataegi;0.999996613335036;  
MN144203;Lepidoptera;Lycaena tityrus;Lycaena tityrus;1;Lycaena tityrus;0.999998928238034;  
MN144204;Lepidoptera;Erebia medusa;NA;0.004;Erebia medusa;0.988860233429614;  
MN144205;Lepidoptera;Cupido alcetas;NA;0.208;Cupido alcetas;0.827997387380645;  
MN144206;Lepidoptera;Thymelicus acteon;Thymelicus acteon;1;Thymelicus acteon;0.99999999752248;  
MN144207;Lepidoptera;Aporia crataegi;NA;NA;Aporia crataegi;0.999996781126733;  
MN144208;Lepidoptera;Maniola jurtina;NA;0.012;Maniola jurtina;0.91755716175482;  
MN144209;Lepidoptera;Pieris napi;NA;0.011;Pieris napi;0.801985394724814;  
MN144212;Lepidoptera;Pyrgus carthami;Pyrgus carthami;1;Pyrgus carthami;0.999999568765909;  
MN144213;Lepidoptera;Fabriciana adippe;NA;NA;Fabriciana adippe;0.907696205558758;  
MN144214;Lepidoptera;Boloria dia;Boloria dia;1;Boloria dia;0.99999999961204;  
MN144215;Lepidoptera;Melitaea nevadensis;Melitaea celadussa;0.999;Melitaea celadussa;0.998819206090668;  
MN144217;Lepidoptera;Pyrgus armoricanus;Pyrgus armoricanus;1;Pyrgus armoricanus;0.999997353848817;  
MN144218;Lepidoptera;Erynnis tages;Erynnis tages;1;Erynnis tages;0.999999281987018;  
MN144219;Lepidoptera;Cupido argiades;NA;0.499;NA;0.99999999984682;  
MN144220;Lepidoptera;Melitaea didyma;Melitaea didyma;1;Melitaea didyma;0.999945824175549;  
MN144221;Lepidoptera;Satyrium ilicis;Satyrium ilicis;1;Satyrium ilicis;0.99999963901758;  
MN144222;Lepidoptera;Brenthis daphne;Brenthis daphne;0.001;Brenthis daphne;0.996209297077896;  
MN144223;Lepidoptera;Satyrium ilicis;Satyrium ilicis;1;Satyrium ilicis;0.999999987901305;  
MN144224;Lepidoptera;Lycaena thersamon;Lycaena thersamon;0.001;Lycaena thersamon;0.952360353045614;

MN144225;Lepidoptera;Lampides boeticus;Lampides boeticus;1;Lampides boeticus;0.999999999636799;  
MN144226;Lepidoptera;Lycaena phlaeas;Lycaena phlaeas;1;Lycaena phlaeas;0.9999999996363186;  
MN144228;Lepidoptera;Ochlodes sylvanus;NA;NA;Ochlodes sylvanus;0.996982382831402;  
MN144229;Lepidoptera;Colias alfacariensis;Colias alfacariensis;1;Colias  
alfacariensis;0.999986994131001;  
MN144230;Lepidoptera;Maniola jurtina;NA;0.001;Maniola jurtina;0.939220105860875;  
MN144232;Lepidoptera;Fabriciana elisa;Fabriciana elisa;0.001;Fabriciana elisa;0.987164394138903;  
MN144233;Lepidoptera;Aricia agestis;NA;0.069;Aricia agestis;0.995918114091591;  
MN144234;Lepidoptera;Coenonympha pamphilus;Coenonympha pamphilus;1;Coenonympha  
pamphilus;0.999999999999488;  
MN144235;Lepidoptera;Polyommatus thersites;Polyommatus thersites;0.999;Polyommatus  
thersites;0.9999985539095;  
MN144236;Lepidoptera;Boloria euphrosyne;Boloria euphrosyne;0.001;Boloria  
euphrosyne;0.999985640170951;  
MN144237;Lepidoptera;Parnassius mnemosyne;Parnassius mnemosyne;1;Parnassius  
mnemosyne;0.999997016336;  
MN144238;Lepidoptera;Melitaea nevadensis;NA;0.006;Melitaea celadussa;0.848898461529793;  
MN144239;Lepidoptera;Gonepteryx cleopatra;Gonepteryx cleopatra;0.998;Gonepteryx  
cleopatra;0.999118636582266;  
MN144240;Lepidoptera;Cupido minimus;NA;0.002;Cupido minimus;0.998310531907725;  
MN144241;Lepidoptera;Melitaea didyma;Melitaea didyma;NA;Melitaea didyma;0.986420113105139;  
MN144243;Lepidoptera;Argynnis paphia;Argynnis paphia;1;Argynnis paphia;0.999999993495607;  
MN144244;Lepidoptera;Fabriciana elisa;Fabriciana elisa;0.001;Fabriciana elisa;0.998051656630059;  
MN144245;Lepidoptera;Polyommatus daphnis;Polyommatus daphnis;1;Polyommatus  
daphnis;0.999956965089886;  
MN144246;Lepidoptera;Polyommatus dorylas;NA;0.095;Polyommatus dorylas;0.99849617361391;  
MN144247;Lepidoptera;Maniola jurtina;NA;0.012;Maniola jurtina;0.91755716175482;  
MN144248;Lepidoptera;Aricia agestis;NA;0.253;Aricia agestis;0.996350017387504;  
MN144249;Lepidoptera;Thymelicus acteon;Thymelicus acteon;1;Thymelicus acteon;0.99999999752248;  
MN144250;Lepidoptera;Plebejus idas;NA;0.001;NA;0.994620093546684;  
MN144251;Lepidoptera;Hipparchia leighebi;Hipparchia leighebi;0.001;Hipparchia  
leighebi;0.902021590912856;  
MN144252;Lepidoptera;Plebejus argus;NA;0.036;Plebejus argus;0.988160277018267;  
MN144256;Lepidoptera;Colias crocea;NA;0.059;NA;0.999999999999738;  
MN144257;Lepidoptera;Gonepteryx rhamni;NA;0.474;Gonepteryx rhamni;0.982076396127858;  
MN144258;Lepidoptera;Lasiommata megera;Lasiommata megera;1;Lasiommata megera;0.999379144055441;  
MN144259;Lepidoptera;Thymelicus acteon;Thymelicus acteon;1;Thymelicus acteon;0.99999999752248;  
MN144260;Lepidoptera;Lasiommata megera;Lasiommata megera;1;Lasiommata megera;0.999928528239676;  
MN144261;Lepidoptera;Colias crocea;NA;0.059;NA;0.999999999999738;  
MN144263;Lepidoptera;Melitaea didyma;Melitaea didyma;1;Melitaea didyma;0.999915443046521;  
MN144266;Lepidoptera;Colias phicomone;NA;0.001;Colias phicomone;0.985598879697681;  
MN144268;Lepidoptera;Lycaena tityrus;Lycaena tityrus;1;Lycaena tityrus;0.999995729087172;  
MN144269;Lepidoptera;Aricia cramera;Aricia cramera;1;Aricia cramera;0.999993731037033;  
MN144270;Lepidoptera;Thymelicus sylvestris;NA;0.325;Thymelicus sylvestris;0.99988971198557;  
MN144271;Lepidoptera;Nymphalis antiopa;NA;0.23;Nymphalis antiopa;0.999999944198096;  
MN144272;Lepidoptera;Gonepteryx rhamni;NA;0.474;Gonepteryx rhamni;0.982076396127858;  
MN144274;Lepidoptera;Melanargia galathea;Melanargia galathea;NA;Melanargia  
galathea;0.935799586887365;  
MN144275;Lepidoptera;Agriades optilete;Agriades optilete;1;Agriades optilete;0.999999979754364;  
MN144277;Lepidoptera;Maniola nurag;Maniola nurag;0.999;Maniola nurag;0.985442504736314;  
MN144278;Lepidoptera;Argynnis aglaja;NA;NA;Speyeria aglaja;0.872991147917853;  
MN144279;Lepidoptera;Fabriciana adippe;NA;NA;Fabriciana adippe;0.900255826442102;  
MN144281;Lepidoptera;Vanessa cardui;Vanessa cardui;1;Vanessa cardui;0.99998496715812;  
MN144282;Lepidoptera;Plebejus argyrognomon;NA;0.001;NA;0.994620093546684;  
MN144284;Lepidoptera;Lasiommata maera;Lasiommata maera;1;Lasiommata maera;0.999995062825059;  
MN144285;Lepidoptera;Gonepteryx cleopatra;Gonepteryx cleopatra;0.998;Gonepteryx  
cleopatra;0.999118636582266;  
MN144287;Lepidoptera;Satyrus ferula;Satyrus ferula;0.003;Satyrus ferula;0.993315829621761;  
MN144288;Lepidoptera;Celastrina argiolus;Celastrina argiolus;1;Celastrina  
argiolus;0.999527385150531;  
MN144289;Lepidoptera;Polyommatus icarus;NA;0.13;Polyommatus icarus;0.979762695748748;  
MN144290;Lepidoptera;Aricia agestis;NA;0.067;Aricia agestis;0.999509743227786;  
MN144291;Lepidoptera;Gegenes nostrodamus;Gegenes nostrodamus;1;Gegenes  
nostrodamus;0.999999996883645;  
MN144292;Lepidoptera;Colias phicomone;NA;0.001;Colias phicomone;0.985598879697681;  
MN144293;Lepidoptera;Pyrgus carlinae;NA;NA;Pyrgus carlinae;0.838222338791955;  
MN144294;Lepidoptera;Hipparchia semele;NA;0.003;Hipparchia semele;0.816572302714125;  
MN144295;Lepidoptera;Lysandra coridon;Lysandra coridon;NA;Lysandra coridon;0.751306202970619;  
MN144296;Lepidoptera;Cupido argiades;NA;0.499;NA;0.999999999984682;  
MN144298;Lepidoptera;Lasiommata maera;Lasiommata maera;1;Lasiommata maera;0.999988599344549;  
MN144299;Lepidoptera;Aglais urticae;NA;0.002;Aglais urticae;0.987497593219019;  
MN144300;Lepidoptera;Maniola jurtina;NA;0.179;Maniola jurtina;0.928865666976697;  
MN144301;Lepidoptera;Melitaea didyma;Melitaea didyma;1;Melitaea didyma;0.999429129005203;  
MN144302;Lepidoptera;Aglais urticae;NA;0.002;Aglais urticae;0.987497593219019;  
MN144304;Lepidoptera;Coenonympha arcania;NA;0.316;NA;0.999999999999985;  
MN144305;Lepidoptera;Aporia crataegi;NA;0.003;Aporia crataegi;0.999999100143817;  
MN144307;Lepidoptera;Erebia euryale;NA;NA;Erebia euryale;0.919518760623792;  
MN144308;Lepidoptera;Colias croceus;NA;NA;NA;0.999999999981573;

MN144309;Lepidoptera;Erebia euryale;NA;NA;Erebia euryale;0.93493911427573;  
MN144310;Lepidoptera;Maniola jurtina;NA;0.001;Maniola jurtina;0.939220105860875;  
MN144311;Lepidoptera;Callophrys rubi;NA;0.003;Callophrys rubi;0.997328639918919;  
MN144313;Lepidoptera;Lycaena tityrus;Lycaena tityrus;1;Lycaena tityrus;0.999998928238034;  
MN144317;Lepidoptera;Lycaena thersamon;Lycaena thersamon;0.001;Lycaena  
thersamon;0.952360353045614;  
MN144318;Lepidoptera;Iolana iolas;Iolana iolas;1;Iolana iolas;0.999998642388204;  
MN144319;Lepidoptera;Coenonympha pamphilus;Coenonympha pamphilus;1;Coenonympha  
pamphilus;0.99999999999744;  
MN144320;Lepidoptera;Polyommatus icarus;NA;0.001;NA;0.999994270558956;  
MN144322;Lepidoptera;Polyommatus icarus;NA;0.004;Polyommatus icarus;0.963846856760863;  
MN144324;Lepidoptera;Lysandra coridon;NA;NA;NA;0.999039793228043;  
MN144328;Lepidoptera;Argynnis paphia;Argynnis paphia;1;Argynnis paphia;0.999999991389927;  
MN144329;Lepidoptera;Brintesia circe;Brintesia circe;1;Brintesia circe;0.99999951254154;  
MN144330;Lepidoptera;Celastrina argiolus;Celastrina argiolus;1;Celastrina  
argiolus;0.999527385150531;  
MN144331;Lepidoptera;Aglais urticae;NA;0.002;Aglais urticae;0.987497593219019;  
MN144332;Lepidoptera;Plebejus idas;NA;0.004;NA;0.999605698719885;  
MN144333;Lepidoptera;Pyrgus andromedae;Pyrgus andromedae;0.001;Pyrgus  
andromedae;0.997448239493065;  
MN144334;Lepidoptera;Lasiommata megera;Lasiommata megera;1;Lasiommata megera;0.999901156782745;  
MN144335;Lepidoptera;Polyommatus thersites;Polyommatus thersites;0.001;Polyommatus  
thersites;0.999999937179697;  
MN144338;Lepidoptera;Aporia crataegi;NA;NA;Aporia crataegi;0.999998459680561;  
MN144340;Lepidoptera;Polyommatus eros;NA;0.005;Polyommatus eros;0.95275169203039;  
MN144341;Lepidoptera;Lycaena tityrus;Lycaena tityrus;1;Lycaena tityrus;0.999998928238034;  
MN144342;Lepidoptera;Thymelicus sylvestris;Thymelicus sylvestris;1;Thymelicus  
sylvestris;0.999997651947126;  
MN144343;Lepidoptera;Anthocharis cardamines;Anthocharis cardamines;1;Anthocharis  
cardamines;0.999999933384063;  
MN144345;Lepidoptera;Cupido argiades;NA;0.499;NA;0.99999999984682;  
MN144346;Lepidoptera;Cupido alcetas;NA;0.073;Cupido alcetas;0.882620048874762;  
MN144348;Lepidoptera;Brenthis ino;Brenthis ino;0.007;Brenthis ino;0.977157381961834;  
MN144349;Lepidoptera;Celastrina argiolus;Celastrina argiolus;1;Celastrina  
argiolus;0.999527385150531;  
MN144350;Lepidoptera;Hipparchia hermione;NA;NA;NA;0.999999999999991;  
MN144351;Lepidoptera;Coenonympha pamphilus;Coenonympha pamphilus;1;Coenonympha  
pamphilus;0.999999999999744;  
MN144352;Lepidoptera;Hipparchia fidia;Hipparchia fidia;1;Hipparchia fidia;0.999999999999972;  
MN144354;Lepidoptera;Brenthis ino;Brenthis ino;0.012;Brenthis ino;0.98099365658015;  
MN144355;Lepidoptera;Hipparchia statilinus;Hipparchia statilinus;1;Hipparchia  
statilinus;0.999999999999972;  
MN144356;Lepidoptera;Carcharodus baeticus;Carcharodus baeticus;1;Carcharodus  
baeticus;0.999986572863;  
MN144357;Lepidoptera;Coenonympha arcania;NA;0.06;Coenonympha arcania;0.984507032905799;  
MN144358;Lepidoptera;Plebejus argus;NA;0.328;Plebejus argus;0.969789734199889;  
MN144359;Lepidoptera;Lycaena phlaeas;Lycaena phlaeas;1;Lycaena phlaeas;0.9999999308983;  
MN144360;Lepidoptera;Pyrgus armoricanus;Pyrgus armoricanus;1;Pyrgus  
armoricanus;0.999997653599873;  
MN144362;Lepidoptera;Polyommatus dorylas;Polyommatus dorylas;0.025;Polyommatus  
dorylas;0.973229109265438;  
MN144364;Lepidoptera;Pyrgus malvoides;NA;0.176;Pyrgus malvoides;0.940490890379026;  
MN144366;Lepidoptera;Vanessa cardui;Vanessa cardui;1;Vanessa cardui;0.999999459983318;  
MN144368;Lepidoptera;Polyommatus icarus;NA;0.001;Polyommatus icarus;0.992342281322443;  
MN144369;Lepidoptera;Lasiommata megera;Lasiommata megera;1;Lasiommata megera;0.999379144055441;  
MN144370;Lepidoptera;Maniola cecilia;Pyronia cecilia;1;Pyronia cecilia;0.999999999999943;  
MN144372;Lepidoptera;Aricia agestis;NA;0.067;Aricia agestis;0.999509743227786;  
MN144373;Lepidoptera;Satyrium acaciae;Satyrium acaciae;1;Satyrium acaciae;0.999999147683661;  
MN144375;Lepidoptera;Aricia cramera;Aricia cramera;1;Aricia cramera;0.999993731037033;  
MN144376;Lepidoptera;Satyrium acaciae;Satyrium acaciae;1;Satyrium acaciae;0.9999990998542;  
MN144379;Lepidoptera;Euphydryas aurinia;NA;0.002;Euphydryas aurinia;0.988654629778563;  
MN144380;Lepidoptera;Euphydryas aurinia;NA;0.106;Euphydryas aurinia;0.993939072040577;  
MN144381;Lepidoptera;Minois dryas;NA;0.025;Minois dryas;0.850746026247397;  
MN144382;Lepidoptera;Nymphalis c-album;NA;0.215;NA;0.999999192918557;  
MN144383;Lepidoptera;Melitaea diamina;NA;0.305;Melitaea diamina;0.999999994065661;  
MN144384;Lepidoptera;Thymelicus acteon;Thymelicus acteon;1;Thymelicus acteon;0.9999999752248;  
MN144385;Lepidoptera;Lycaena phlaeas;Lycaena phlaeas;1;Lycaena phlaeas;0.99999996363186;  
MN144386;Lepidoptera;Anthocharis damone;Anthocharis damone;1;Anthocharis  
damone;0.9999999829717;  
MN144387;Lepidoptera;Celastrina argiolus;Celastrina argiolus;1;Celastrina  
argiolus;0.999527385150531;  
MN144392;Lepidoptera;Lycaena phlaeas;Lycaena phlaeas;1;Lycaena phlaeas;0.99999998167567;  
MN144396;Lepidoptera;Fabriciana elisa;Fabriciana elisa;0.001;Fabriciana elisa;0.998051656630059;  
MN144397;Lepidoptera;Melitaea deione;Melitaea deione;1;Melitaea deione;0.99999996865029;  
MN144398;Lepidoptera;Polyommatus icarus;NA;0.001;Polyommatus icarus;0.981285528541973;  
MN144399;Lepidoptera;Maniola jurtina;NA;0.157;Maniola jurtina;0.72935823378201;  
MN144402;Lepidoptera;Gonepteryx cleopatra;Gonepteryx cleopatra;0.998;Gonepteryx  
cleopatra;0.999118636582266;

MN144403;Lepidoptera;Coenonympha pamphilus;Coenonympha pamphilus;1;Coenonympha  
pamphilus;0.99999999999744;  
MN144404;Lepidoptera;Celastrina argiolus;Celastrina argiolus;1;Celastrina  
argiolus;0.999527385150531;  
MN144405;Lepidoptera;Maniola jurtina;NA;0.001;Maniola jurtina;0.939220105860875;  
MN144407;Lepidoptera;Anthocharis cardamines;Anthocharis cardamines;1;Anthocharis  
cardamines;0.999999914452477;  
MN144409;Lepidoptera;Boloria euphrosyne;Boloria euphrosyne;1;Boloria  
euphrosyne;0.99996904544576;  
MN144410;Lepidoptera;Cupido osiris;Cupido osiris;1;Cupido osiris;0.9999953611873;  
MN144413;Lepidoptera;Brintesia circe;Brintesia circe;NA;Brintesia circe;0.9999894309325;  
MN144414;Lepidoptera;Melitaea nevadensis;NA;0.005;Melitaea celadussa;0.873944840950458;  
MN144415;Lepidoptera;Maniola jurtina;NA;0.001;Maniola jurtina;0.939220105860875;  
MN144416;Lepidoptera;Erebia euryale;NA;NA;Erebia euryale;0.901177970671016;  
MN144418;Lepidoptera;Glaucopsyche alexis;Glaucopsyche alexis;0.001;Glaucopsyche  
alexis;0.94042380088325;  
MN144419;Lepidoptera;Lampides boeticus;Lampides boeticus;1;Lampides boeticus;0.99999999545906;  
MN144420;Lepidoptera;Thymelicus acteon;Thymelicus acteon;1;Thymelicus acteon;0.9999999752248;  
MN144422;Lepidoptera;Hipparchia semele;NA;0.002;Hipparchia semele;0.784603069619426;  
MN144423;Lepidoptera;Erebia scipio;Erebia scipio;1;Erebia scipio;0.99999989753832;  
MN144425;Lepidoptera;Carcharodus alceae;Carcharodus alceae;1;Carcharodus  
alceae;0.99999998465938;  
MN144429;Lepidoptera;Vanessa cardui;Vanessa cardui;1;Vanessa cardui;0.99999459983318;  
MN144430;Lepidoptera;Lasiommata megera;Lasiommata megera;1;Lasiommata megera;0.999928528239676;  
MN144431;Lepidoptera;Aglais urticae;NA;NA;Aglais urticae;0.983446773677965;  
MN144433;Lepidoptera;Maniola jurtina;NA;0.012;Maniola jurtina;0.91755716175482;  
MN144434;Lepidoptera;Nymphalis c-album;NA;0.215;NA;0.99999192918557;  
MN144435;Lepidoptera;Melitaea nevadensis;NA;0.001;NA;0.99999999896095;  
MN144437;Lepidoptera;Maniola jurtina;NA;0.012;Maniola jurtina;0.91755716175482;  
MN144438;Lepidoptera;Satyrium ilicis;Satyrium ilicis;1;Satyrium ilicis;0.99999987901305;  
MN144440;Lepidoptera;Coenonympha arcania;NA;0.022;Coenonympha arcania;0.987735012529952;  
MN144441;Lepidoptera;Lasiommata maera;Lasiommata maera;1;Lasiommata maera;0.99999510792253;  
MN144442;Lepidoptera;Plebejus argyrognomon;NA;0.001;NA;0.998518811781132;  
MN144448;Lepidoptera;Vanessa atalanta;Vanessa atalanta;1;Vanessa atalanta;0.99999999710838;  
MN144449;Lepidoptera;Aricia cramera;Aricia cramera;1;Aricia cramera;0.99993731037033;  
MN144451;Lepidoptera;Polyommatus amandus;Polyommatus amandus;0.002;Polyommatus  
amandus;0.999988846644937;  
MN144452;Lepidoptera;Hipparchia fagi;Hipparchia fagi;NA;Hipparchia fagi;0.950400297569756;  
MN144455;Lepidoptera;Satyrium spini;Satyrium spini;1;Satyrium spini;0.99999835426407;  
MN144457;Lepidoptera;Cupido minimus;NA;0.002;Cupido minimus;0.999502389125855;  
MN144458;Lepidoptera;Pyrgus warrenensis;NA;0.003;NA;0.9999999937504;  
MN144459;Lepidoptera;Carcharodus alceae;Carcharodus alceae;1;Carcharodus  
alceae;0.99999998465938;  
MN144460;Lepidoptera;Aricia agestis;NA;0.253;Aricia agestis;0.996350017387504;  
MN144462;Lepidoptera;Thymelicus acteon;Thymelicus acteon;1;Thymelicus acteon;0.99999997365563;  
MN144463;Lepidoptera;Plebejus idas;NA;0.001;NA;0.998518811781132;  
MN144464;Lepidoptera;Polyommatus icarus;Polyommatus icarus;0.001;Polyommatus  
icarus;0.999851522482238;  
MN144465;Lepidoptera;Melitaea cinxia;Melitaea cinxia;1;Melitaea cinxia;0.99999999999829;  
MN144466;Lepidoptera;Lasiommata megera;Lasiommata megera;1;Lasiommata megera;0.999928528239676;  
MN144468;Lepidoptera;Lasiommata megera;Lasiommata megera;1;Lasiommata megera;0.999928528239676;  
MN144469;Lepidoptera;Argynnis paphia;Argynnis paphia;1;Argynnis paphia;0.99999991389927;  
MN144470;Lepidoptera;Coenonympha corinna;Coenonympha corinna;1;Coenonympha  
corinna;0.99999999974449;  
MN144471;Lepidoptera;Nymphalis egea;Polygonia egea;1;Polygonia egea;0.99999758078475;  
MN144472;Lepidoptera;Melitaea britomartis;NA;NA;Melitaea britomartis;0.956350416682137;  
MN144474;Lepidoptera;Pyrgus serratulae;Pyrgus serratulae;1;Pyrgus serratulae;0.99999966026991;  
MN144475;Lepidoptera;Chazara briseis;Chazara briseis;1;Chazara briseis;0.999975731693442;  
MN144476;Lepidoptera;Pyrgus carthami;Pyrgus carthami;1;Pyrgus carthami;0.99997353719783;  
MN144478;Lepidoptera;Parnassius apollo;Parnassius apollo;1;Parnassius apollo;0.993171140264103;  
MN144479;Lepidoptera;Cupido minimus;NA;0.001;Cupido minimus;0.99986754786846;  
MN144480;Lepidoptera;Polyommatus icarus;NA;0.002;Polyommatus icarus;0.999071190425614;  
MN144481;Lepidoptera;Aporia crataegi;NA;NA;Aporia crataegi;0.99996781126733;  
MN144482;Lepidoptera;Argynnis aglaja;NA;0.005;Speyeria aglaja;0.789841192814942;  
MN144485;Lepidoptera;Celastrina argiolus;Celastrina argiolus;1;Celastrina  
argiolus;0.999527385150531;  
MN144486;Lepidoptera;Maniola jurtina;NA;NA;NA;0.9999999985062;  
MN144487;Lepidoptera;Euphydryas aurinia;Euphydryas aurinia;0.016;Euphydryas  
aurinia;0.997751503369639;  
MN144488;Lepidoptera;Maniola jurtina;NA;NA;Maniola jurtina;0.973823960006955;  
MN144491;Lepidoptera;Carterocephalus palaemon;NA;0.052;Carterocephalus  
palaemon;0.728445051795325;  
MN144492;Lepidoptera;Maniola jurtina;NA;0.001;Maniola jurtina;0.939220105860875;  
MN144494;Lepidoptera;Melitaea nevadensis;Melitaea celadussa;0.998;Melitaea  
celadussa;0.994769644780387;  
MN144495;Lepidoptera;Hipparchia hermione;Hipparchia hermione;1;Hipparchia  
hermione;0.999791304970896;  
MN144497;Lepidoptera;Coenonympha arcania;NA;0.001;NA;0.999999999999975;

MN144498;Lepidoptera;Celastrina argiolus;Celastrina argiolus;1;Celastrina argiolus;0.999527385150531;  
MN144499;Lepidoptera;Erebia melampus;Erebia melampus;0.011;Erebia melampus;0.975499903768874;  
MN144502;Lepidoptera;Melitaea nevadensis;NA;0.002;NA;0.999999999959163;  
MN144503;Lepidoptera;Gegenes pumilio;Gegenes pumilio;1;Gegenes pumilio;0.999986726679266;  
MN144504;Lepidoptera;Nymphalis c-album;NA;0.277;NA;0.999998664789697;  
MN144505;Lepidoptera;Euphydryas aurinia;NA;0.106;Euphydryas aurinia;0.993939072040577;  
MN144506;Lepidoptera;Maniola jurtina;NA;0.001;Maniola jurtina;0.939220105860875;  
MN144507;Lepidoptera;Argynnis aglaja;NA;0.002;Speyeria aglaja;0.87239079736947;  
MN144509;Lepidoptera;Euphydryas aurinia;NA;0.001;Euphydryas aurinia;0.995576749826865;  
MN144510;Lepidoptera;Callophrys rubi;NA;0.019;Callophrys rubi;0.998201459637982;  
MN144511;Lepidoptera;Pyrgus onopordi;Pyrgus onopordi;1;Pyrgus onopordi;0.999997111229755;  
MN144512;Lepidoptera;Lasiommata megera;Lasiommata megera;1;Lasiommata megera;0.999928528239676;  
MN144513;Lepidoptera;Brintesia circe;Brintesia circe;1;Brintesia circe;0.99999951254154;  
MN144517;Lepidoptera;Carcharodus alceae;Carcharodus alceae;1;Carcharodus alceae;0.99999998465938;  
MN144519;Lepidoptera;Colias alfacariensis;Colias alfacariensis;1;Colias alfacariensis;0.999986994131001;  
MN144520;Lepidoptera;Hamearis lucina;NA;NA;Hamearis lucina;0.999999999984141;  
MN144521;Lepidoptera;Coenonympha dorus;Coenonympha dorus;1;Coenonympha dorus;0.999999999889212;  
MN144522;Lepidoptera;Melitaea cinxia;Melitaea cinxia;1;Melitaea cinxia;0.99999999999602;  
MN144523;Lepidoptera;Aricia cramera;Aricia cramera;1;Aricia cramera;0.999993731037033;  
MN144524;Lepidoptera;Aphantopus hyperantus;Aphantopus hyperantus;0.006;Aphantopus hyperantus;0.999998615504572;  
MN144526;Lepidoptera;Erebia melampus;Erebia melampus;NA;Erebia melampus;0.95270636633208;  
MN144527;Lepidoptera;Fabriciana niobe;Fabriciana niobe;0.001;Fabriciana niobe;0.93186202957215;  
MN144528;Lepidoptera;Erynnis tages;Erynnis tages;1;Erynnis tages;0.99999281987018;  
MN144530;Lepidoptera;Aphantopus hyperantus;Aphantopus hyperantus;0.008;Aphantopus hyperantus;0.999997357046848;  
MN144531;Lepidoptera;Lycaena tityrus;Lycaena tityrus;1;Lycaena tityrus;0.999995729087172;  
MN144533;Lepidoptera;Plebejus argyrognomon;NA;0.001;NA;0.994620093546684;  
MN144534;Lepidoptera;Aphantopus hyperantus;Aphantopus hyperantus;0.006;Aphantopus hyperantus;0.999998615504572;  
MN144536;Lepidoptera;Hipparchia statilinus;Hipparchia statilinus;1;Hipparchia statilinus;0.999999999999744;  
MN144538;Lepidoptera;Coenonympha pamphilus;Coenonympha pamphilus;1;Coenonympha pamphilus;0.99999999999886;  
MN144539;Lepidoptera;Pieris napi;NA;NA;Pieris napi;0.899894923766075;  
MN144540;Lepidoptera;Pyrgus carlinae;NA;NA;Pyrgus carlinae;0.834540241634631;  
MN144543;Lepidoptera;Carcharodus baeticus;Carcharodus baeticus;1;Carcharodus baeticus;0.999956286218202;  
MN144544;Lepidoptera;Colias alfacariensis;Colias alfacariensis;1;Colias alfacariensis;0.999944653442302;  
MN144545;Lepidoptera;Argynnis paphia;Argynnis paphia;1;Argynnis paphia;0.999999991389927;  
MN144546;Lepidoptera;Colias crocea;NA;0.059;NA;0.99999999999738;  
MN144547;Lepidoptera;Coenonympha pamphilus;Coenonympha pamphilus;1;Coenonympha pamphilus;0.999999999999744;  
MN144549;Lepidoptera;Thymelicus lineola;Thymelicus lineola;1;Thymelicus lineola;0.999922373873481;  
MN144550;Lepidoptera;Brenthis daphne;Brenthis daphne;0.001;Brenthis daphne;0.997781825264304;  
MN144552;Lepidoptera;Celastrina argiolus;Celastrina argiolus;1;Celastrina argiolus;0.999527385150531;  
MN144553;Lepidoptera;Glaucopsyche alexis;Glaucopsyche alexis;0.001;Glaucopsyche alexis;0.94042380088325;  
MN144554;Lepidoptera;Maniola jurtina;NA;0.011;NA;0.999999999999484;  
MN144555;Lepidoptera;Maniola jurtina;NA;0.012;Maniola jurtina;0.91755716175482;  
MN144556;Lepidoptera;Lasiommata megera;Lasiommata megera;1;Lasiommata megera;0.999379144055441;  
MN144557;Lepidoptera;Maniola cecilia;Pyronia cecilia;1;Pyronia cecilia;1;  
MN144559;Lepidoptera;Satyrium acaciae;Satyrium acaciae;1;Satyrium acaciae;0.999999951077798;  
MN144560;Lepidoptera;Plebejus argus;Plebejus argus;0.004;Plebejus argus;0.989715396991954;  
MN144561;Lepidoptera;Lasiommata megera;Lasiommata megera;1;Lasiommata megera;0.999379144055441;  
MN144562;Lepidoptera;Polyommatus icarus;NA;0.001;Polyommatus icarus;0.981285528541973;  
MN144563;Lepidoptera;Hipparchia statilinus;Hipparchia statilinus;1;Hipparchia statilinus;0.999999999999886;  
MN144564;Lepidoptera;Pyrgus andromedae;Pyrgus andromedae;0.001;Pyrgus andromedae;0.997448239493065;  
MN144565;Lepidoptera;Aricia cramera;Aricia cramera;1;Aricia cramera;0.999969749613305;  
MN144566;Lepidoptera;Satyrus ferula;NA;0.002;Satyrus ferula;0.981657631383108;  
MN144568;Lepidoptera;Plebejus argus;NA;0.122;Plebejus argus;0.956948912376078;  
MN144569;Lepidoptera;Celastrina argiolus;Celastrina argiolus;1;Celastrina argiolus;0.999527385150531;  
MN144570;Lepidoptera;Thymelicus lineola;Thymelicus lineola;1;Thymelicus lineola;0.999995927238524;  
MN144571;Lepidoptera;Plebejus argus;Plebejus argus;0.014;Plebejus argus;0.979849220658559;  
MN144572;Lepidoptera;Coenonympha rhodopensis;Coenonympha rhodopensis;0.001;Coenonympha rhodopensis;0.975591799330553;  
MN144574;Lepidoptera;Lasiommata megera;Lasiommata megera;1;Lasiommata megera;0.999935793528248;

MN144575;Lepidoptera;Euphydryas aurinia;Euphydryas aurinia;0.017;Euphydryas aurinia;0.997183742560994;  
MN144577;Lepidoptera;Vanessa cardui;Vanessa cardui;1;Vanessa cardui;0.999999459983318;  
MN144578;Lepidoptera;Aporia crataegi;NA;NA;Aporia crataegi;0.999996781126733;  
MN144579;Lepidoptera;Pyrgus carthami;Pyrgus carthami;1;Pyrgus carthami;0.999981753488076;  
MN144581;Lepidoptera;Heteropterus morpheus;NA;NA;Heteropterus morpheus;0.999999999999943;  
MN144582;Lepidoptera;Colias crocea;NA;0.059;NA;0.999999999999738;  
MN144583;Lepidoptera;Coenonympha arcania;NA;0.001;NA;0.999999999999959;  
MN144584;Lepidoptera;Boloria euphrosyne;Boloria euphrosyne;1;Boloria euphrosyne;0.99999850140295;  
MN144585;Lepidoptera;Aricia agestis;NA;NA;Aricia agestis;0.996930365249266;  
MN144586;Lepidoptera;Melitaea didyma;Melitaea didyma;1;Melitaea didyma;0.98517420354651;  
MN144587;Lepidoptera;Agriades glandon;NA;0.001;Agriades glandon;0.986645583198728;  
MN144588;Lepidoptera;Ochlodes sylvanus;NA;0.316;Ochlodes sylvanus;0.996318754838625;  
MN144589;Lepidoptera;Satyrium acaciae;Satyrium acaciae;1;Satyrium acaciae;0.99999442805616;  
MN144590;Lepidoptera;Coenonympha pamphilus;Coenonympha pamphilus;1;Coenonympha pamphilus;0.999999999999744;  
MN144591;Lepidoptera;Erebia nivalis;NA;NA;NA;0.999999999999947;  
MN144592;Lepidoptera;Lysandra coridon;NA;NA;NA;0.999096384185023;  
MN144593;Lepidoptera;Melitaea didyma;Melitaea didyma;1;Melitaea didyma;0.99958019737737;  
MN144595;Lepidoptera;Colias crocea;NA;0.059;NA;0.999999999999738;  
MN144596;Lepidoptera;Carcharodus alceae;Carcharodus alceae;0.999;Carcharodus alceae;0.99999998008462;  
MN144597;Lepidoptera;Melitaea didyma;Melitaea didyma;1;Melitaea didyma;0.999802889137687;  
MN144598;Lepidoptera;Erynnis tages;Erynnis tages;1;Erynnis tages;0.99999281987018;  
MN144599;Lepidoptera;Aricia eumedon;Eumedonia eumedon;1;Eumedonia eumedon;0.999626407603944;  
MN144601;Lepidoptera;Cupido minimus;NA;0.01;Cupido minimus;0.999822522018942;  
MN144604;Lepidoptera;Erynnis tages;Erynnis tages;1;Erynnis tages;0.999997762421119;  
MN144607;Lepidoptera;Vanessa cardui;Vanessa cardui;1;Vanessa cardui;0.99996792914969;  
MN144608;Lepidoptera;Boloria dia;Boloria dia;1;Boloria dia;0.99999999980503;  
MN144609;Lepidoptera;Erebia epiphron;Erebia epiphron;NA;Erebia epiphron;0.998837748029833;  
MN144611;Lepidoptera;Aphantopus hyperantus;Aphantopus hyperantus;0.003;Aphantopus hyperantus;0.99999455871523;  
MN144612;Lepidoptera;Pieris napi;NA;0.011;Pieris napi;0.801985394724814;  
MN144613;Lepidoptera;Polyommatus thersites;Polyommatus thersites;0.001;Polyommatus thersites;0.999999937179697;  
MN144615;Lepidoptera;Hipparchia fagi;NA;NA;Hipparchia fagi;0.972067720306053;  
MN144616;Lepidoptera;Hipparchia semele;NA;0.002;Hipparchia semele;0.784603069619426;  
MN144617;Lepidoptera;Glaucopsyche alexis;Glaucopsyche alexis;0.001;Glaucopsyche alexis;0.94042380088325;  
MN144619;Lepidoptera;Aricia agestis;NA;0.067;Aricia agestis;0.999509743227786;  
MN144620;Lepidoptera;Coenonympha glycerion;NA;0.221;Coenonympha glycerion;0.999998704466507;  
MN144621;Lepidoptera;Arethusana arethusana;NA;0.151;Arethusana arethusana;0.999916613919011;  
MN144623;Lepidoptera;Coenonympha pamphilus;Coenonympha pamphilus;1;Coenonympha pamphilus;0.99999999999886;  
MN144624;Lepidoptera;Lasiommata megera;Lasiommata megera;1;Lasiommata megera;0.999379144055441;  
MN144627;Lepidoptera;Colias hyale;Colias hyale;0.015;Colias hyale;0.99997884296128;  
MN144628;Lepidoptera;Maniola jurtina;NA;NA;Maniola jurtina;0.949988160645333;  
MN144629;Lepidoptera;Lampides boeticus;Lampides boeticus;1;Lampides boeticus;0.999999999545906;  
MN144630;Lepidoptera;Maniola jurtina;NA;0.001;Maniola jurtina;0.939220105860875;  
MN144632;Lepidoptera;Lysandra hispana;NA;NA;NA;0.998070184737648;  
MN144633;Lepidoptera;Aporia crataegi;NA;NA;Aporia crataegi;0.999996781126733;  
MN144635;Lepidoptera;Coenonympha arcania;NA;0.004;NA;0.999999999999983;  
MN144637;Lepidoptera;Plebejus idas;NA;0.002;NA;0.998900415846545;  
MN144638;Lepidoptera;Coenonympha pamphilus;Coenonympha pamphilus;1;Coenonympha pamphilus;0.999999999999744;  
MN144639;Lepidoptera;Vanessa cardui;Vanessa cardui;1;Vanessa cardui;0.999997579965112;  
MN144640;Lepidoptera;Melitaea cinxia;Melitaea cinxia;1;Melitaea cinxia;0.99999999999829;  
MN144641;Lepidoptera;Pyrgus serratulae;Pyrgus serratulae;1;Pyrgus serratulae;0.9999989567508;  
MN144642;Lepidoptera;Coenonympha pamphilus;Coenonympha pamphilus;1;Coenonympha pamphilus;0.999999999999744;  
MN144643;Lepidoptera;Maniola jurtina;NA;0.001;Maniola jurtina;0.939220105860875;  
MN144644;Lepidoptera;Colias crocea;NA;0.059;NA;0.999999999999738;  
MN144645;Lepidoptera;Nymphalis io;NA;0.491;Aglais io;0.930153237246992;  
MN144646;Lepidoptera;Satyrus actaea;Satyrus actaea;0.008;Satyrus actaea;0.953457555207052;  
MN144647;Lepidoptera;Pyrgus cacaliae;Pyrgus cacaliae;0.001;Pyrgus cacaliae;0.99354498208327;  
MN144648;Lepidoptera;Polyommatus icarus;NA;0.007;Polyommatus icarus;0.999081737461227;  
MN144651;Lepidoptera;Satyrus ferula;Satyrus ferula;0.001;Satyrus ferula;0.993167978959987;  
MN144652;Lepidoptera;Satyrium spini;Satyrium spini;1;Satyrium spini;0.99999835426407;  
MN144654;Lepidoptera;Maniola cecilia;Pyronia cecilia;1;Pyronia cecilia;1;  
MN144655;Lepidoptera;Erebia euryale;NA;NA;Erebia euryale;0.910117453478044;  
MN144656;Lepidoptera;Melitaea didyma;Melitaea didyma;1;Melitaea didyma;0.999429129005203;  
MN144658;Lepidoptera;Fabriciana niobe;NA;0.005;Fabriciana niobe;0.992125835358755;  
MN144662;Lepidoptera;Fabriciana adippe;Fabriciana adippe;1;Fabriciana adippe;0.995947626017421;  
MN144667;Lepidoptera;Ochlodes sylvanus;NA;0.316;Ochlodes sylvanus;0.996318754838625;  
MN144668;Lepidoptera;Boloria selene;NA;0.159;Boloria selene;0.99999861703297;  
MN144669;Lepidoptera;Thymelicus acteon;Thymelicus acteon;1;Thymelicus acteon;0.9999999752248;  
MN144673;Lepidoptera;Thymelicus acteon;Thymelicus acteon;1;Thymelicus acteon;0.99999998015312;

MN144674;Lepidoptera;Callophrys rubi;NA;0.003;Callophrys rubi;0.997328639918919;  
MN144675;Lepidoptera;Gegenes pumilio;Gegenes pumilio;0.006;Gegenes pumilio;0.999839984031977;  
MN144677;Lepidoptera;Polyommatus daphnis;Polyommatus daphnis;1;Polyommatus  
daphnis;0.999914340379782;  
MN144681;Lepidoptera;Fabriciana niobe;NA;0.005;Fabriciana niobe;0.992125835358755;  
MN144682;Lepidoptera;Argynnis aglaja;NA;NA;Speyeria aglaja;0.872991147917853;  
MN144685;Lepidoptera;Maniola jurtina;NA;0.001;Maniola jurtina;0.939220105860875;  
MN144688;Lepidoptera;Heteropterus morpheus;NA;NA;Heteropterus morpheus;0.999999999999943;  
MN144689;Lepidoptera;Argynnis paphia;Argynnis paphia;1;Argynnis paphia;0.99999991389927;  
MN144691;Lepidoptera;Satyrus ferula;Satyrus ferula;0.001;Satyrus ferula;0.973028384941015;  
MN144692;Lepidoptera;Pyrgus carlinae;NA;NA;Pyrgus carlinae;0.854199018204849;  
MN144694;Lepidoptera;Thymelicus lineola;Thymelicus lineola;1;Thymelicus  
lineola;0.999971535093703;  
MN144695;Lepidoptera;Colias crocea;NA;0.059;NA;0.999999999999738;  
MN144696;Lepidoptera;Chazara briseis;Chazara briseis;1;Chazara briseis;0.999975731693442;  
MN144697;Lepidoptera;Pyrgus malvoides;NA;0.176;Pyrgus malvoides;0.940490890379026;  
MN144698;Lepidoptera;Pyrgus foulquieri;NA;NA;Pyrgus alveus;0.827119616974978;  
MN144700;Lepidoptera;Lycaena tityrus;Lycaena tityrus;1;Lycaena tityrus;0.99998928238034;  
MN144701;Lepidoptera;Callophrys rubi;NA;0.003;Callophrys rubi;0.997328639918919;  
MN144702;Lepidoptera;Maniola jurtina;NA;0.001;Maniola jurtina;0.939220105860875;  
MN144703;Lepidoptera;Plebejus argus;Plebejus argus;0.997;Plebejus argus;0.989220292397081;  
MN144704;Lepidoptera;Celastrina argiolus;Celastrina argiolus;1;Celastrina  
argiolus;0.999527385150531;  
MN144705;Lepidoptera;Thymelicus lineola;Thymelicus lineola;1;Thymelicus  
lineola;0.999995927238524;  
MN144706;Lepidoptera;Boloria euphrosyne;Boloria euphrosyne;0.001;Boloria  
euphrosyne;0.999985640170951;  
MN144708;Lepidoptera;Melitaea didyma;Melitaea didyma;1;Melitaea didyma;0.999638528251842;  
MN144709;Lepidoptera;Polyommatus celina;Polyommatus celina;1;Polyommatus  
celina;0.999999999108582;  
MN144710;Lepidoptera;Aglaia urticae;NA;0.002;Aglaia urticae;0.987497593219019;  
MN144712;Lepidoptera;Erebia euryale;NA;NA;Erebia euryale;0.952625148879608;  
MN144713;Lepidoptera;Ochlodes sylvanus;NA;0.147;Ochlodes sylvanus;0.997399334044411;  
MN144714;Lepidoptera;Satyrium spini;Satyrium spini;1;Satyrium spini;0.999999704867762;  
MN144715;Lepidoptera;Lasiommata megera;Lasiommata megera;1;Lasiommata megera;0.999379144055441;  
MN144718;Lepidoptera;Erebia pharte;Erebia pharte;1;Erebia pharte;0.9999999630495;  
MN144719;Lepidoptera;Hipparchia semele;NA;NA;Hipparchia semele;0.748345401572611;  
MN144720;Lepidoptera;Polyommatus icarus;NA;0.07;Polyommatus icarus;0.861997145553611;  
MN144722;Lepidoptera;Melitaea didyma;Melitaea didyma;1;Melitaea didyma;0.999851940985243;  
MN144724;Lepidoptera;Pyrgus armoricanus;Pyrgus armoricanus;1;Pyrgus  
armoricanus;0.999997353848817;  
MN144726;Lepidoptera;Hipparchia neapolitana;NA;0.001;NA;0.999999999999843;  
MN144728;Lepidoptera;Polyommatus dolus;Polyommatus dolus;0.997;Polyommatus  
dolus;0.955195871823379;  
MN144730;Lepidoptera;Coenonympha arcania;NA;0.12;NA;0.999999999999993;  
MN144731;Lepidoptera;Coenonympha dorus;Coenonympha dorus;1;Coenonympha dorus;0.99999999826628;  
MN144732;Lepidoptera;Aricia agestis;NA;0.067;Aricia agestis;0.999509743227786;  
MN144734;Lepidoptera;Nymphalis c-album;NA;0.08;NA;0.999996025433302;  
MN144736;Lepidoptera;Melitaea didyma;Melitaea didyma;1;Melitaea didyma;0.999802889137687;  
MN144738;Lepidoptera;Thymelicus sylvestris;NA;0.324;Thymelicus sylvestris;0.999940778442454;  
MN144739;Lepidoptera;Hipparchia statilinus;Hipparchia statilinus;1;Hipparchia  
statilinus;0.9999999999999773;  
MN144740;Lepidoptera;Colias phicomone;NA;0.001;Colias phicomone;0.985598879697681;  
MN144741;Lepidoptera;Gonepteryx cleopatra;Gonepteryx cleopatra;0.998;Gonepteryx  
cleopatra;0.999118636582266;  
MN144742;Lepidoptera;Maniola jurtina;NA;0.001;Maniola jurtina;0.939220105860875;  
MN144743;Lepidoptera;Nymphalis c-album;NA;0.08;NA;0.999996025433302;  
MN144744;Lepidoptera;Satyrium pruni;NA;0.076;Satyrium pruni;0.990322364021655;  
MN144745;Lepidoptera;Anthocharis cardamines;Anthocharis cardamines;1;Anthocharis  
cardamines;0.999999587023041;  
MN144747;Lepidoptera;Thymelicus sylvestris;Thymelicus sylvestris;1;Thymelicus  
sylvestris;0.99999876153052;  
MN144748;Lepidoptera;Fabriciana adippe;NA;NA;Fabriciana adippe;0.922280384106682;  
MN144749;Lepidoptera;Hipparchia hermione;NA;NA;NA;0.999999999999991;  
MN144752;Lepidoptera;Coenonympha glycerion;NA;0.295;Coenonympha glycerion;0.999998958157621;  
MN144753;Lepidoptera;Melanargia galathea;Melanargia galathea;NA;Melanargia  
galathea;0.901527856528843;  
MN144754;Lepidoptera;Gonepteryx cleopatra;Gonepteryx cleopatra;0.998;Gonepteryx  
cleopatra;0.999118636582266;  
MN144757;Lepidoptera;Erebia pronoe;Erebia pronoe;0.986;Erebia pronoe;0.99976446165235;  
MN144759;Lepidoptera;Hipparchia fagi;NA;NA;Hipparchia fagi;0.958291584360022;  
MN144760;Lepidoptera;Lycaena phlaeas;Lycaena phlaeas;1;Lycaena phlaeas;0.99999996363186;  
MN144761;Lepidoptera;Erebia stiria;NA;NA;Erebia styx;0.890739244956497;  
MN144762;Lepidoptera;Melanargia galathea;Melanargia galathea;NA;Melanargia  
galathea;0.95380785254417;  
MN144764;Lepidoptera;Cercyonis lupina;Hyponephele lupina;1;Hyponephele lupina;0.999999968814081;  
MN144765;Lepidoptera;Erebia neoridas;NA;NA;Erebia neoridas;0.996179269678551;  
MN144766;Lepidoptera;Cupido argiades;NA;0.499;NA;0.999999999984682;



MN144767;Lepidoptera;Lycaena tityrus;Lycaena tityrus;1;Lycaena tityrus;0.999998928238034;  
MN144768;Lepidoptera;Polyommatus dorylas;Polyommatus dorylas;0.008;Polyommatus  
dorylas;0.991281865899703;  
MN144769;Lepidoptera;Oeneis glacialis;Oeneis glacialis;0.999;Oeneis glacialis;0.989651164378454;  
MN144770;Lepidoptera;Hipparchia semele;NA;NA;Hipparchia semele;0.86892676007213;  
MN144771;Lepidoptera;Plebejus idas;NA;0.007;NA;0.999546324331549;  
MN144773;Lepidoptera;Maniola jurtina;NA;0.001;Maniola jurtina;0.939220105860875;  
MN144774;Lepidoptera;Thymelicus acteon;Thymelicus acteon;1;Thymelicus acteon;0.9999999752248;  
MN144775;Lepidoptera;Lasiommata megera;Lasiommata megera;1;Lasiommata megera;0.999928528239676;  
MN144776;Lepidoptera;Aricia cramera;Aricia cramera;1;Aricia cramera;0.999993731037033;  
MN144777;Lepidoptera;Lycaena phlaeas;Lycaena phlaeas;1;Lycaena phlaeas;0.99999996363186;  
MN144778;Lepidoptera;Lycaena tityrus;Lycaena tityrus;1;Lycaena tityrus;0.999998928238034;  
MN144779;Lepidoptera;Erebia pharte;Erebia pharte;1;Erebia pharte;0.9999999630495;  
MN144780;Lepidoptera;Maniola jurtina;NA;NA;Maniola jurtina;0.949988160645333;  
MN144781;Lepidoptera;Gonepteryx cleopatra;Gonepteryx cleopatra;0.998;Gonepteryx  
cleopatra;0.999118636582266;  
MN144782;Lepidoptera;Erebia meolans;Erebia meolans;0.999;Erebia meolans;0.998120207354193;  
MN144783;Lepidoptera;Lycaena phlaeas;Lycaena phlaeas;1;Lycaena phlaeas;0.99999996363186;  
MN144785;Lepidoptera;Maniola cecilia;Pyronia cecilia;NA;Pyronia cecilia;0.99999999999972;  
MN144786;Lepidoptera;Pyrgus malvae;Pyrgus malvae;0.001;Pyrgus malvae;0.994574915391411;  
MN144787;Lepidoptera;Glaucopsyche alexis;Glaucopsyche alexis;0.001;Glaucopsyche  
alexis;0.94042380088325;  
MN144788;Lepidoptera;Satyrium w-album;Satyrium w-album;0.019;Satyrium w-album;0.998947772665936;  
MN144789;Lepidoptera;Ochlodes sylvanus;NA;NA;Ochlodes sylvanus;0.996277947191819;  
MN144790;Lepidoptera;Hipparchia statilinus;Hipparchia statilinus;1;Hipparchia  
statilinus;0.999999999999943;  
MN144791;Lepidoptera;Araschnia levana;Araschnia levana;1;Araschnia levana;0.999999772187832;  
MN144792;Lepidoptera;Melitaea cinxia;Melitaea cinxia;1;Melitaea cinxia;0.999999999999631;  
MN144793;Lepidoptera;Aricia cramera;Aricia cramera;1;Aricia cramera;0.999993731037033;  
MN144795;Lepidoptera;Polyommatus icarus;NA;0.001;Polyommatus icarus;0.981285528541973;  
MN144797;Lepidoptera;Maniola jurtina;NA;0.179;Maniola jurtina;0.910754182974362;  
MN144798;Lepidoptera;Lampides boeticus;Lampides boeticus;1;Lampides boeticus;0.99999999545906;  
MN144802;Lepidoptera;Brenthis ino;Brenthis ino;0.002;Brenthis ino;0.974924736382612;  
MN144803;Lepidoptera;Erynnis tages;Erynnis tages;1;Erynnis tages;0.999999281987018;  
MN144804;Lepidoptera;Pieris napi;NA;0.011;Pieris napi;0.801985394724814;  
MN144805;Lepidoptera;Polyommatus amandus;Polyommatus amandus;0.001;Polyommatus  
amandus;0.999983821158591;  
MN144806;Lepidoptera;Thymelicus lineola;Thymelicus lineola;1;Thymelicus  
lineola;0.999995927238524;  
MN144807;Lepidoptera;Pyrgus onopordi;Pyrgus onopordi;1;Pyrgus onopordi;0.999997111229755;  
MN144808;Lepidoptera;Charaxes jasius;Charaxes jasius;NA;Charaxes jasius;0.990397821479112;  
MN144809;Lepidoptera;Pyrgus cacaliae;Pyrgus cacaliae;0.001;Pyrgus cacaliae;0.99354498208327;  
MN144810;Lepidoptera;Lasiommata maera;Lasiommata maera;1;Lasiommata maera;0.99999535513922;  
MN144811;Lepidoptera;Hipparchia statilinus;Hipparchia statilinus;1;Hipparchia  
statilinus;0.999999999999829;  
MN144813;Lepidoptera;Melitaea deione;Melitaea deione;1;Melitaea deione;0.99999999926078;  
MN144814;Lepidoptera;Cupido alcetas;NA;0.218;Cupido alcetas;0.833501983138177;  
MN144815;Lepidoptera;Satyrium ilicis;Satyrium ilicis;1;Satyrium ilicis;0.99999987901305;  
MN144816;Lepidoptera;Lycaena phlaeas;Lycaena phlaeas;1;Lycaena phlaeas;0.99999996363186;  
MN144818;Lepidoptera;Lysandra hispana;NA;NA;NA;0.998346382460118;  
MN144820;Lepidoptera;Maniola jurtina;NA;0.012;Maniola jurtina;0.91755716175482;  
MN144821;Lepidoptera;Colias crocea;NA;0.059;NA;0.999999999999738;  
MN144822;Lepidoptera;Coenonympha pamphilus;Coenonympha pamphilus;1;Coenonympha  
pamphilus;0.9999999999998977;  
MN144823;Lepidoptera;Polyommatus icarus;NA;0.001;Polyommatus icarus;0.981285528541973;  
MN144824;Lepidoptera;Thymelicus sylvestris;NA;0.324;Thymelicus sylvestris;0.999940778442454;  
MN144825;Lepidoptera;Nymphalis io;NA;0.491;Aglais io;0.930153237246992;  
MN144827;Lepidoptera;Maniola jurtina;NA;NA;Maniola jurtina;0.949988160645333;  
MN144828;Lepidoptera;Plebejus idas;NA;0.001;NA;0.998518811781132;  
MN144829;Lepidoptera;Colias alfacariensis;Colias alfacariensis;0.001;Colias  
alfacariensis;0.999857790810452;  
MN144830;Lepidoptera;Pieris napi;NA;0.028;Pieris napi;0.888205720664699;  
MN144832;Lepidoptera;Cupido minimus;NA;0.006;Cupido minimus;0.999768371759258;  
MN144833;Lepidoptera;Agriades glandon;NA;0.002;Agriades glandon;0.987189585708506;  
MN144834;Lepidoptera;Erebia pharte;Erebia pharte;1;Erebia pharte;0.9999999630495;  
MN144836;Lepidoptera;Maniola jurtina;NA;0.001;Maniola jurtina;0.939220105860875;  
MN144837;Lepidoptera;Boloria graeca;Boloria graeca;1;Boloria graeca;0.99999899854037;  
MN144839;Lepidoptera;Melitaea cinxia;Melitaea cinxia;1;Melitaea cinxia;0.999999999999801;  
MN144841;Lepidoptera;Lysandra hispana;NA;NA;Lysandra hispana;0.805395477457411;  
MN144842;Lepidoptera;Melitaea nevadensis;Melitaea celadussa;0.984;Melitaea  
celadussa;0.981161773437733;  
MN144844;Lepidoptera;Pieris napi;NA;0.066;Pieris napi;0.832895481558215;  
MN144845;Lepidoptera;Ochlodes sylvanus;NA;0.316;Ochlodes sylvanus;0.996318754838625;  
MN144846;Lepidoptera;Thymelicus lineola;Thymelicus lineola;1;Thymelicus  
lineola;0.999930684106799;  
MN144847;Lepidoptera;Melitaea nevadensis;NA;0.004;Melitaea celadussa;0.907493211955444;  
MN144850;Lepidoptera;Polyommatus thersites;Polyommatus thersites;0.001;Polyommatus  
thersites;0.999999937179697;

MN144851;Lepidoptera;Cupido osiris;Cupido osiris;1;Cupido osiris;0.999999751968633;  
 MN144852;Lepidoptera;Melitaea cinxia;Melitaea cinxia;1;Melitaea cinxia;0.999999999999403;  
 MN144854;Lepidoptera;Lampides boeticus;Lampides boeticus;1;Lampides boeticus;0.99999999545906;  
 MN144855;Lepidoptera;Coenonympha dorus;Coenonympha dorus;1;Coenonympha dorus;0.99999999827679;  
 MN144856;Lepidoptera;Melitaea nevadensis;NA;0.001;NA;0.99999999900955;  
 MN144857;Lepidoptera;Fabriciana elisa;Fabriciana elisa;0.001;Fabriciana elisa;0.998051656630059;  
 MN144858;Lepidoptera;Limenitis camilla;Limenitis camilla;0.006;Limenitis  
 camilla;0.999984828595764;  
 MN144859;Lepidoptera;Argynnis paphia;Argynnis paphia;1;Argynnis paphia;0.999999991389927;  
 MN144860;Lepidoptera;Brenthis daphne;NA;0.102;Brenthis daphne;0.717134521611551;  
 MN144861;Lepidoptera;Coenonympha corinna;Coenonympha corinna;1;Coenonympha  
 corinna;0.99999999866276;  
 MN144862;Lepidoptera;Brintesia circe;Brintesia circe;1;Brintesia circe;0.99999951254154;  
 MN144863;Lepidoptera;Aricia agestis;NA;0.124;Aricia agestis;0.999431662040292;  
 MN144864;Lepidoptera;Pyrgus armoricanus;Pyrgus armoricanus;1;Pyrgus  
 armoricanus;0.999914079595002;  
 MN144865;Lepidoptera;Erebia neoridas;NA;NA;Erebia neoridas;0.994368810769763;  
 MN144866;Lepidoptera;Aricia cramera;Aricia cramera;1;Aricia cramera;0.999993970273909;  
 MN144868;Lepidoptera;Agriades glandon;Agriades glandon;NA;Agriades glandon;0.989560338766428;  
 MN144870;Lepidoptera;Maniola jurtina;NA;0.012;Maniola jurtina;0.91755716175482;  
 MN144871;Lepidoptera;Plebejus argus;Plebejus argus;1;Plebejus argus;0.996275432571165;  
 MN144872;Lepidoptera;Pieris napi;NA;0.011;Pieris napi;0.801985394724814;  
 MN144874;Lepidoptera;Erebia pandrose;Erebia pandrose;0.998;Erebia pandrose;0.997117103851311;  
 MN144875;Lepidoptera;Carterocephalus palaemon;NA;0.052;Carterocephalus  
 palaemon;0.728445051795325;  
 MN144877;Lepidoptera;Argynnis aglaja;NA;NA;Speyeria aglaja;0.872991147917853;  
 MN144878;Lepidoptera;Oeneis glacialis;NA;NA;Oeneis glacialis;0.894225823747824;  
 MN144879;Lepidoptera;Ochlodes sylvanus;NA;0.316;Ochlodes sylvanus;0.996318754838625;  
 MN144880;Lepidoptera;Argynnis paphia;Argynnis paphia;1;Argynnis paphia;0.999999991389927;  
 MN144881;Lepidoptera;Fabriciana niobe;Fabriciana niobe;0.001;Fabriciana niobe;0.93186202957215;  
 MN144884;Lepidoptera;Polyommatus icarus;NA;0.011;Polyommatus icarus;0.997904873174084;  
 MN144885;Lepidoptera;Maniola cecilia;Pyronia cecilia;NA;Pyronia cecilia;1;  
 MN144886;Lepidoptera;Gonepteryx rhamni;NA;0.192;Gonepteryx rhamni;0.991002175992451;  
 MN144887;Lepidoptera;Pieris napi;NA;0.028;Pieris napi;0.888205720664699;  
 MN144889;Lepidoptera;Ochlodes sylvanus;NA;0.316;Ochlodes sylvanus;0.996318754838625;  
 MN144891;Lepidoptera;Gonepteryx rhamni;NA;0.474;Gonepteryx rhamni;0.982076396127858;  
 MN144893;Lepidoptera;Satyrium ilicis;Satyrium ilicis;1;Satyrium ilicis;0.999999987901305;  
 MN144895;Lepidoptera;Vanessa cardui;Vanessa cardui;1;Vanessa cardui;0.999999803450484;  
 MN144896;Lepidoptera;Gonepteryx cleopatra;Gonepteryx cleopatra;0.998;Gonepteryx  
 cleopatra;0.999118636582266;  
 MN144898;Lepidoptera;Lasiommata megera;Lasiommata megera;1;Lasiommata megera;0.999928528239676;  
 MN144900;Lepidoptera;Lycaena dispar;Lycaena dispar;1;Lycaena dispar;0.99999990743959;  
 MN144901;Lepidoptera;Coenonympha pamphilus;Coenonympha pamphilus;1;Coenonympha  
 pamphilus;0.99999999999744;  
 MN144902;Lepidoptera;Erebia pharte;Erebia pharte;1;Erebia pharte;0.99999999630495;  
 MN144903;Lepidoptera;Pyrgus malvoides;NA;0.2;Pyrgus malvoides;0.91582520613586;  
 MN144904;Lepidoptera;Aricia cramera;Aricia cramera;1;Aricia cramera;0.999993731037033;  
 MN144910;Lepidoptera;Satyrus actaea;Satyrus actaea;0.002;Satyrus actaea;0.996459824853088;  
 MN144912;Lepidoptera;Issoria lathonia;Issoria lathonia;1;Issoria lathonia;0.99999999989257;  
 MN144913;Lepidoptera;Hipparchia fagi;NA;NA;Hipparchia fagi;0.882395021352844;  
 MN144914;Lepidoptera;Erebia pluto;Erebia pluto;1;Erebia pluto;0.99999993360746;  
 MN144915;Lepidoptera;Colias hyale;Colias hyale;0.015;Colias hyale;0.999997884296128;  
 MN144916;Lepidoptera;Maniola jurtina;NA;0.001;Maniola jurtina;0.939220105860875;  
 MN144917;Lepidoptera;Melitaea cinxia;Melitaea cinxia;1;Melitaea cinxia;0.99999999998749;  
 MN144918;Lepidoptera;Thymelicus lineola;Thymelicus lineola;1;Thymelicus  
 lineola;0.999995927238524;  
 MN144919;Lepidoptera;Carcharodus alceae;Carcharodus alceae;0.999;Carcharodus  
 alceae;0.999999998008462;  
 MN144920;Lepidoptera;Argynnis paphia;Argynnis paphia;1;Argynnis paphia;0.999999991389927;  
 MN144921;Lepidoptera;Erynnis tages;Erynnis tages;1;Erynnis tages;0.999999281987018;  
 MN144922;Lepidoptera;Aricia cramera;Aricia cramera;1;Aricia cramera;0.999993731037033;  
 MN144924;Lepidoptera;Maniola jurtina;NA;0.012;Maniola jurtina;0.91755716175482;  
 MN144926;Lepidoptera;Erebia melampus;NA;NA;Erebia melampus;0.914071830164708;  
 MN144927;Lepidoptera;Lasiommata megera;Lasiommata megera;1;Lasiommata megera;0.999928528239676;  
 MN144928;Lepidoptera;Coenonympha arcania;NA;0.004;NA;0.99999999999983;  
 MN144930;Lepidoptera;Pyrgus cacaliae;Pyrgus cacaliae;0.001;Pyrgus cacaliae;0.997779968725098;  
 MN144931;Lepidoptera;Issoria lathonia;Issoria lathonia;1;Issoria lathonia;0.99999999965326;  
 MN144932;Lepidoptera;Agriades orbitulus;Agriades orbitulus;0.002;Agriades  
 orbitulus;0.99926992950131;  
 MN144933;Lepidoptera;Lycaena tityrus;Lycaena tityrus;1;Lycaena tityrus;0.999995729087172;  
 MN144935;Lepidoptera;Aricia agestis;NA;0.067;Aricia agestis;0.999509743227786;  
 MN144936;Lepidoptera;Lycaena phlaeas;Lycaena phlaeas;1;Lycaena phlaeas;0.99999996363186;  
 MN144937;Lepidoptera;Hipparchia hermione;NA;NA;NA;0.99999999999991;  
 MN144938;Lepidoptera;Thymelicus sylvestris;NA;0.324;Thymelicus sylvestris;0.999940778442454;  
 MN144941;Lepidoptera;Coenonympha gardetta;NA;0.005;NA;0.999999999999961;  
 MN144942;Lepidoptera;Cupido alcetas;NA;0.218;Cupido alcetas;0.833501983138177;  
 MN144944;Lepidoptera;Nymphalis c-album;NA;0.215;NA;0.999999192918557;  
 MN144946;Lepidoptera;Lasiommata megera;Lasiommata megera;1;Lasiommata megera;0.999379144055441;

MN144947;Lepidoptera;Argynnis paphia;Argynnis paphia;1;Argynnis paphia;0.99999999418182;  
MN144948;Lepidoptera;Coenonympha pamphilus;Coenonympha pamphilus;1;Coenonympha  
pamphilus;0.999999999999744;  
MN144951;Lepidoptera;Thymelicus sylvestris;Thymelicus sylvestris;1;Thymelicus  
sylvestris;0.999999989506279;  
MN144952;Lepidoptera;Maniola jurtina;NA;NA;NA;0.99999999988982;  
MN144954;Lepidoptera;Hipparchia fagi;Hipparchia fagi;NA;Hipparchia fagi;0.977095449098437;  
MN144955;Lepidoptera;Plebejus argus;NA;0.328;Plebejus argus;0.969789734199889;  
MN144956;Lepidoptera;Erebia pronoe;Erebia pronoe;1;Erebia pronoe;0.999250891771858;  
MN144957;Lepidoptera;Thymelicus acteon;Thymelicus acteon;1;Thymelicus acteon;0.99999999752248;  
MN144958;Lepidoptera;Chazara briseis;Chazara briseis;0.001;Chazara briseis;0.999984130678865;  
MN144959;Lepidoptera;Nymphalis io;NA;0.494;Aglais io;0.798973823966906;  
MN144960;Lepidoptera;Coenonympha glycerion;NA;0.213;Coenonympha glycerion;0.999998402638365;  
MN144961;Lepidoptera;Argynnis paphia;Argynnis paphia;1;Argynnis paphia;0.999999991389927;  
MN144963;Lepidoptera;Thymelicus lineola;Thymelicus lineola;1;Thymelicus  
lineola;0.999990451952522;  
MN144964;Lepidoptera;Aporia crataegi;NA;NA;Aporia crataegi;0.999996781126733;  
MN144965;Lepidoptera;Satyrium ilicis;Satyrium ilicis;1;Satyrium ilicis;0.999999983861443;  
MN144966;Lepidoptera;Satyrium spini;Satyrium spini;1;Satyrium spini;0.99999851808479;  
MN144967;Lepidoptera;Maniola jurtina;NA;0.001;Maniola jurtina;0.939220105860875;  
MN144970;Lepidoptera;Lasiommata megera;Lasiommata megera;1;Lasiommata megera;0.999379144055441;  
MN144972;Lepidoptera;Polyommatus celina;Polyommatus celina;1;Polyommatus  
celina;0.99999999975725;  
MN144973;Lepidoptera;Maniola jurtina;NA;0.175;Maniola jurtina;0.950174303242181;  
MN144974;Lepidoptera;Celastrina argiolus;Celastrina argiolus;1;Celastrina  
argiolus;0.999527385150531;  
MN144975;Lepidoptera;Maniola jurtina;NA;NA;Maniola jurtina;0.953827931447544;  
MN144976;Lepidoptera;Melanargia galathea;Melanargia galathea;0.002;Melanargia  
galathea;0.973014771646719;  
MN144977;Lepidoptera;Ochlodes sylvanus;NA;0.316;Ochlodes sylvanus;0.996318754838625;  
MN144978;Lepidoptera;Erebia nivalis;NA;NA;NA;0.999999999999775;  
MN144979;Lepidoptera;Polyommatus icarus;Polyommatus icarus;0.001;Polyommatus  
icarus;0.999843487466598;  
MN144980;Lepidoptera;Lycaena virgaureae;NA;0.463;Lycaena virgaureae;0.998978647124085;  
MN144981;Lepidoptera;Hipparchia hermione;Hipparchia hermione;NA;NA;0.999999999999972;  
MN144982;Lepidoptera;Euphydryas intermedia;NA;0.13;NA;0.999999999997684;  
MN144984;Lepidoptera;Melanargia galathea;Melanargia galathea;0.001;Melanargia  
galathea;0.984550991630551;  
MN144985;Lepidoptera;Maniola jurtina;NA;0.001;Maniola jurtina;0.939220105860875;  
MN144986;Lepidoptera;Thymelicus acteon;Thymelicus acteon;1;Thymelicus acteon;0.99999999752248;  
MN144988;Lepidoptera;Melitaea cinxia;Melitaea cinxia;1;Melitaea cinxia;0.99999999999801;  
MN144990;Lepidoptera;Aporia crataegi;NA;NA;Aporia crataegi;0.999996781126733;  
MN144992;Lepidoptera;Satyrus actaea;Satyrus actaea;0.005;Satyrus actaea;0.990237417464148;  
MN144993;Lepidoptera;Polyommatus eros;NA;0.003;Polyommatus eros;0.969556536658472;  
MN144996;Lepidoptera;Pyrgus armoricanus;Pyrgus armoricanus;1;Pyrgus  
armoricanus;0.999914079595002;  
MN144997;Lepidoptera;Lasiommata megera;Lasiommata megera;0.001;Lasiommata  
megera;0.99801969109144;  
MN144999;Lepidoptera;Heteropterus morpheus;NA;NA;Heteropterus morpheus;0.999999999999943;  
MN145000;Lepidoptera;Erynnis tages;Erynnis tages;1;Erynnis tages;0.999999281987018;  
MN145001;Lepidoptera;Plebejus argus;Plebejus argus;0.014;Plebejus argus;0.985827082916227;  
MN145002;Lepidoptera;Fabriciana adippe;NA;NA;Fabriciana adippe;0.922280384106682;  
MN145003;Lepidoptera;Maniola cecilia;Pyronia cecilia;NA;Pyronia cecilia;1;  
MN145004;Lepidoptera;Maniola cecilia;Pyronia cecilia;NA;Pyronia cecilia;0.999999999999972;  
MN145005;Lepidoptera;Hipparchia fidia;Hipparchia fidia;1;Hipparchia fidia;1;  
MN145006;Lepidoptera;Euphydryas aurinia;NA;0.048;Euphydryas aurinia;0.996368864467059;  
MN145007;Lepidoptera;Aricia cramera;Aricia cramera;1;Aricia cramera;0.999993731037033;  
MN145008;Lepidoptera;Colias palaeno;NA;0.001;NA;0.999999999982869;  
MN145009;Lepidoptera;Coenonympha arcania;NA;0.002;NA;0.999999999999972;  
MN145012;Lepidoptera;Polyommatus eros;NA;0.003;Polyommatus eros;0.844977105932921;  
MN145013;Lepidoptera;Lycaena tityrus;Lycaena tityrus;1;Lycaena tityrus;0.999992975810954;  
MN145015;Lepidoptera;Euphydryas aurinia;NA;0.31;Euphydryas aurinia;0.993387708761386;  
MN145016;Lepidoptera;Lasiommata megera;Lasiommata megera;1;Lasiommata megera;0.999901156782745;  
MN145017;Lepidoptera;Brintesia circe;Brintesia circe;1;Brintesia circe;0.99999696306634;  
MN145018;Lepidoptera;Aricia agestis;NA;0.253;Aricia agestis;0.996350017387504;  
MN145019;Lepidoptera;Melitaea didyma;Melitaea didyma;1;Melitaea didyma;0.99958019737737;  
MN145021;Lepidoptera;Aglais urticae;NA;0.002;Aglais urticae;0.987497593219019;  
MN145022;Lepidoptera;Coenonympha corinna;Coenonympha corinna;1;Coenonympha  
corinna;0.99999999974449;  
MN145023;Lepidoptera;Melitaea cinxia;Melitaea cinxia;1;Melitaea cinxia;0.999999999999829;  
MN145026;Lepidoptera;Satyrium w-album;Satyrium w-album;0.019;Satyrium w-album;0.998947772665936;  
MN145027;Lepidoptera;Lycaena tityrus;Lycaena tityrus;1;Lycaena tityrus;0.99998928238034;  
MN145034;Lepidoptera;Polyommatus celina;Polyommatus celina;0.005;Polyommatus  
celina;0.99999999956259;  
MN145038;Lepidoptera;Brenthis daphne;Brenthis daphne;0.006;Brenthis daphne;0.984559944066479;  
MN145039;Lepidoptera;Polyommatus thersites;Polyommatus thersites;0.001;Polyommatus  
thersites;0.999999949729501;  
MN145040;Lepidoptera;Erebia pronoe;Erebia pronoe;1;Erebia pronoe;0.999250891771858;

MN145041;Lepidoptera;Plebejus argus;NA;NA;Plebejus argus;0.974044139786111;  
MN145042;Lepidoptera;Gonepteryx rhamni;Gonepteryx rhamni;0.003;Gonepteryx  
rhamni;0.99954982012936;  
MN145045;Lepidoptera;Aphantopus hyperantus;Aphantopus hyperantus;0.006;Aphantopus  
hyperantus;0.999999022400994;  
MN145046;Lepidoptera;Boloria euphrosyne;Boloria euphrosyne;0.001;Boloria  
euphrosyne;0.999985640170951;  
MN145049;Lepidoptera;Aporia crataegi;NA;0.009;Aporia crataegi;0.999996613335036;  
MN145050;Lepidoptera;Lasiommata maera;Lasiommata maera;1;Lasiommata maera;0.999997945450226;  
MN145051;Lepidoptera;Maniola jurtina;NA;0.038;NA;0.99999999999524;  
MN145052;Lepidoptera;Satyrium esculi;Satyrium esculi;1;Satyrium esculi;0.99999982867308;  
MN145054;Lepidoptera;Aricia artaxerxes;NA;0.394;Aricia artaxerxes;0.999502890976379;  
MN145055;Lepidoptera;Aricia cramera;Aricia cramera;1;Aricia cramera;0.999993731037033;  
MN145056;Lepidoptera;Colias crocea;NA;NA;NA;0.999999999998415;  
MN145057;Lepidoptera;Pyrgus onopordi;Pyrgus onopordi;1;Pyrgus onopordi;0.99999711229755;  
MN145059;Lepidoptera;Pyrgus serratulae;Pyrgus serratulae;1;Pyrgus serratulae;0.99999807446234;  
MN145060;Lepidoptera;Colias alfacariensis;Colias alfacariensis;1;Colias  
alfacariensis;0.999894613238469;  
MN145061;Lepidoptera;Argynnis aglaja;NA;NA;Speyeria aglaja;0.872991147917853;  
MN145063;Lepidoptera;Thymelicus lineola;Thymelicus lineola;1;Thymelicus  
lineola;0.999995927238524;  
MN145066;Lepidoptera;Lasiommata megera;Lasiommata megera;1;Lasiommata megera;0.999379144055441;  
MN145067;Lepidoptera;Polyommatus escheri;Polyommatus escheri;1;Polyommatus  
escheri;0.999999993907693;  
MN145069;Lepidoptera;Pyrgus armoricanus;Pyrgus armoricanus;1;Pyrgus  
armoricanus;0.999914079595002;  
MN145071;Lepidoptera;Coenonympha pamphilus;Coenonympha pamphilus;1;Coenonympha  
pamphilus;0.999999999999886;  
MN145073;Lepidoptera;Vanessa cardui;Vanessa cardui;1;Vanessa cardui;0.999991578978624;  
MN145075;Lepidoptera;Vanessa cardui;Vanessa cardui;1;Vanessa cardui;0.999999803450484;  
MN145077;Lepidoptera;Gonepteryx rhamni;NA;0.192;Gonepteryx rhamni;0.991002175992451;  
MN145078;Lepidoptera;Nymphalis c-album;NA;0.215;NA;0.999999192918557;  
MN145080;Lepidoptera;Callophrys rubi;NA;0.002;Callophrys rubi;0.998841790162773;  
MN145085;Lepidoptera;Melitaea didyma;Melitaea didyma;1;Melitaea didyma;0.999964971099659;  
MN145087;Lepidoptera;Erebia pronoe;Erebia pronoe;1;Erebia pronoe;0.999250891771858;  
MN145088;Lepidoptera;Melitaea nevadensis;NA;0.026;NA;0.99999999994715;  
MN145089;Lepidoptera;Hipparchia semele;NA;0.002;Hipparchia semele;0.784603069619426;  
MN145091;Lepidoptera;Satyrium pruni;NA;0.076;Satyrium pruni;0.990322364021655;  
MN145092;Lepidoptera;Thymelicus lineola;Thymelicus lineola;1;Thymelicus  
lineola;0.99999628027116;  
MN145093;Lepidoptera;Melitaea didyma;Melitaea didyma;1;Melitaea didyma;0.995729075061249;  
MN145095;Lepidoptera;Maniola jurtina;NA;NA;NA;0.99999999985062;  
MN145096;Lepidoptera;Agriades orbitulus;NA;0.01;Agriades orbitulus;0.998991302227708;  
MN145097;Lepidoptera;Polyommatus icarus;Polyommatus icarus;0.001;Polyommatus  
icarus;0.999851522482238;  
MN145098;Lepidoptera;Satyrium ilicis;Satyrium ilicis;1;Satyrium ilicis;0.999999987901305;  
MN145099;Lepidoptera;Pyrgus serratulae;Pyrgus serratulae;1;Pyrgus serratulae;0.99999807446234;  
MN145101;Lepidoptera;Anthocharis damone;Anthocharis damone;1;Anthocharis  
damone;0.999999991170057;  
MN145102;Lepidoptera;Erebia euryale;NA;NA;Erebia euryale;0.93493911427573;  
MN145103;Lepidoptera;Maniola tithonus;Pyronia tithonus;1;Pyronia tithonus;1;  
MN145104;Lepidoptera;Limenitis populi;Limenitis populi;1;Limenitis populi;0.999999999859654;  
MN145105;Lepidoptera;Maniola jurtina;NA;0.153;Maniola jurtina;0.908984189778786;  
MN145106;Lepidoptera;Polyommatus icarus;NA;0.001;Polyommatus icarus;0.999234434454856;  
MN145107;Lepidoptera;Colias hyale;Colias hyale;0.015;Colias hyale;0.999997884296128;  
MN145109;Lepidoptera;Thymelicus lineola;Thymelicus lineola;1;Thymelicus  
lineola;0.999939194103383;  
MN145110;Lepidoptera;Brenthis daphne;Brenthis daphne;0.006;Brenthis daphne;0.984559944066479;  
MN145111;Lepidoptera;Satyrium ilicis;Satyrium ilicis;1;Satyrium ilicis;0.999999963901758;  
MN145113;Lepidoptera;Papilio machaon;Papilio machaon;NA;Papilio machaon;0.99889956649962;  
MN145115;Lepidoptera;Pyrgus carlinae;NA;NA;Pyrgus carlinae;0.854199018204849;  
MN145116;Lepidoptera;Aporia crataegi;NA;0.001;Aporia crataegi;0.999999008625346;  
MN145117;Lepidoptera;Carcharodus lavatherae;NA;0.117;Carcharodus lavatherae;0.998840587221007;  
MN145118;Lepidoptera;Lasiommata megera;Lasiommata megera;1;Lasiommata megera;0.999928528239676;  
MN145119;Lepidoptera;Melitaea didyma;Melitaea didyma;1;Melitaea didyma;0.999862439660739;  
MN145120;Lepidoptera;Plebejus idas;NA;0.001;NA;0.998857061916804;  
MN145122;Lepidoptera;Favonius quercus;NA;0.006;Favonius quercus;0.905673882316459;  
MN145124;Lepidoptera;Anthocharis cardamines;Anthocharis cardamines;1;Anthocharis  
cardamines;0.99999997953563;  
MN145125;Lepidoptera;Lasiommata megera;Lasiommata megera;1;Lasiommata megera;0.999928528239676;  
MN145126;Lepidoptera;Erebia euryale;NA;NA;Erebia euryale;0.919518760623792;  
MN145127;Lepidoptera;Thecla betulae;Thecla betulae;1;Thecla betulae;0.999999999961119;  
MN145128;Lepidoptera;Argynnis aglaja;NA;NA;Speyeria aglaja;0.872991147917853;  
MN145129;Lepidoptera;Boloria selene;NA;0.179;Boloria selene;0.999999092153374;  
MN145130;Lepidoptera;Boloria selene;NA;NA;Boloria selene;0.999999920739274;  
MN145131;Lepidoptera;Lasiommata maera;Lasiommata maera;1;Lasiommata maera;0.99999510792253;  
MN145132;Lepidoptera;Argynnis paphia;Argynnis paphia;1;Argynnis paphia;0.999999991389927;  
MN145133;Lepidoptera;Maniola jurtina;NA;0.012;Maniola jurtina;0.91755716175482;

MN145135;Lepidoptera;Maniola cecilia;Pyronia cecilia;1;Pyronia cecilia;1;  
MN145136;Lepidoptera;Melitaea diamina;NA;0.305;Melitaea diamina;0.999999994065661;  
MN145138;Lepidoptera;Colias phicomone;NA;0.001;Colias phicomone;0.985598879697681;  
MN145141;Lepidoptera;Lycaena tityrus;Lycaena tityrus;1;Lycaena tityrus;0.999998928238034;  
MN145142;Lepidoptera;Aricia cramera;Aricia cramera;1;Aricia cramera;0.999993731037033;  
MN145143;Lepidoptera;Nymphalis c-album;NA;0.215;NA;0.999999192918557;  
MN145145;Lepidoptera;Satyrus actaea;Satyrus actaea;0.005;Satyrus actaea;0.990237417464148;  
MN145146;Lepidoptera;Lycaena tityrus;Lycaena tityrus;1;Lycaena tityrus;0.999995729087172;  
MN145148;Lepidoptera;Lasiommata maera;Lasiommata maera;1;Lasiommata maera;0.999999181072746;  
MN145149;Lepidoptera;Nymphalis c-album;NA;0.215;NA;0.999999192918557;  
MN145151;Lepidoptera;Maniola jurtina;NA;0.004;Maniola jurtina;0.945071508071422;  
MN145152;Lepidoptera;Celastrina argiolus;Celastrina argiolus;1;Celastrina argiolus;0.999527385150531;  
MN145153;Lepidoptera;Scolitantides orion;Scolitantides orion;1;Scolitantides orion;0.9999999882574;  
MN145154;Lepidoptera;Minois dryas;NA;0.025;Minois dryas;0.850746026247397;  
MN145155;Lepidoptera;Lasiommata maera;Lasiommata maera;1;Lasiommata maera;0.99999510792253;  
MN145156;Lepidoptera;Maniola cecilia;Pyronia cecilia;NA;Pyronia cecilia;1;  
MN145164;Lepidoptera;Hipparchia sbordonii;NA;NA;Hipparchia semele;0.748345401572611;  
MN145159;Lepidoptera;Lycaena dispar;Lycaena dispar;1;Lycaena dispar;0.99999990743959;  
MN145162;Lepidoptera;Aricia agestis;NA;NA;Aricia agestis;0.996930365249266;  
MN145163;Lepidoptera;Callophrys rubi;NA;0.002;Callophrys rubi;0.998841790162773;  
MN145164;Lepidoptera;Polyommatus icarus;NA;0.007;Polyommatus icarus;0.999081737461227;  
MN145165;Lepidoptera;Argynnis paphia;Argynnis paphia;1;Argynnis paphia;0.999999991389927;  
MN145166;Lepidoptera;Nymphalis c-album;NA;0.215;NA;0.999999192918557;  
MN145169;Lepidoptera;Euphydryas intermedia;NA;0.051;NA;0.99999999995438;  
MN145170;Lepidoptera;Hipparchia semele;NA;NA;Hipparchia semele;0.7877760416247;  
MN145171;Lepidoptera;Cupido minimus;NA;0.009;Cupido minimus;0.999791453712643;  
MN145173;Lepidoptera;Melitaea didyma;Melitaea didyma;1;Melitaea didyma;0.999945816868155;  
MN145174;Lepidoptera;Colias crocea;NA;0.059;NA;0.99999999999738;  
MN145176;Lepidoptera;Polyommatus escheri;Polyommatus escheri;1;Polyommatus escheri;0.999999987116326;  
MN145177;Lepidoptera;Thymelicus acteon;Thymelicus acteon;1;Thymelicus acteon;0.99999999752248;  
MN145178;Lepidoptera;Anthocharis damone;Anthocharis damone;1;Anthocharis damone;0.999999997820879;  
MN145180;Lepidoptera;Aphantopus hyperantus;Aphantopus hyperantus;0.001;Aphantopus hyperantus;0.999984645489536;  
MN145181;Lepidoptera;Polyommatus dorylas;Polyommatus dorylas;0.01;Polyommatus dorylas;0.986535405601042;  
MN145182;Lepidoptera;Boloria euphrosyne;Boloria euphrosyne;1;Boloria euphrosyne;0.999999912616861;  
MN145183;Lepidoptera;Melitaea didyma;Melitaea didyma;1;Melitaea didyma;0.999768602965124;  
MN145184;Lepidoptera;Araschnia levana;Araschnia levana;1;Araschnia levana;0.999999772187832;  
MN145185;Lepidoptera;Fabriciana niobe;NA;0.007;Fabriciana niobe;0.984627988609443;  
MN145186;Lepidoptera;Thymelicus sylvestris;Thymelicus sylvestris;1;Thymelicus sylvestris;0.999999981568351;  
MN145187;Lepidoptera;Maniola jurtina;NA;0.001;Maniola jurtina;0.939220105860875;  
MN145189;Lepidoptera;Lasiommata maera;Lasiommata maera;1;Lasiommata maera;0.999998360805571;  
MN145191;Lepidoptera;Euphydryas aurinia;NA;0.001;Euphydryas aurinia;0.995576749826865;  
MN145193;Lepidoptera;Nymphalis c-album;NA;0.215;NA;0.999999192918557;  
MN145194;Lepidoptera;Cupido minimus;NA;0.001;Cupido minimus;0.999803920701362;  
MN145198;Lepidoptera;Vanessa cardui;Vanessa cardui;1;Vanessa cardui;0.999999803450484;  
MN145200;Lepidoptera;Oeneis glacialis;NA;NA;Oeneis glacialis;0.904378746023709;  
MN145202;Lepidoptera;Ochlodes sylvanus;NA;0.316;Ochlodes sylvanus;0.996318754838625;  
MN145203;Lepidoptera;Nymphalis egea;Polygonia egea;1;Polygonia egea;0.999999758078475;  
MN145204;Lepidoptera;Maniola jurtina;Maniola jurtina;0.021;Maniola jurtina;0.802110870400691;  
MN145207;Lepidoptera;Euphydryas aurinia;Euphydryas aurinia;0.02;Euphydryas aurinia;0.99668249939786;  
MN145208;Lepidoptera;Hipparchia statilinus;Hipparchia statilinus;1;Hipparchia statilinus;0.999999999999943;  
MN145209;Lepidoptera;Argynnis paphia;Argynnis paphia;1;Argynnis paphia;0.999999991389927;  
MN145210;Lepidoptera;Maniola jurtina;NA;0.001;Maniola jurtina;0.939220105860875;  
MN145211;Lepidoptera;Boloria selene;NA;0.366;Boloria selene;0.999998148667836;  
MN145212;Lepidoptera;Iphiclides podalirius;NA;0.42;Iphiclides podalirius;0.928601146617709;  
MN145213;Lepidoptera;Melitaea didyma;Melitaea didyma;1;Melitaea didyma;0.999862439660739;  
MN145214;Lepidoptera;Lycaena tityrus;Lycaena tityrus;1;Lycaena tityrus;0.999998928238034;  
MN145216;Lepidoptera;Pyrgus malvoides;NA;0.076;Pyrgus malvoides;0.887854315566122;  
MN145220;Lepidoptera;Ochlodes sylvanus;NA;NA;Ochlodes sylvanus;0.996980159004036;  
MN145222;Lepidoptera;Fabriciana adippe;NA;0.012;Fabriciana adippe;0.784206416884363;  
MN145223;Lepidoptera;Brintesia circe;Brintesia circe;1;Brintesia circe;0.99999951254154;  
MN145224;Lepidoptera;Pyrgus carlinae;Pyrgus carlinae;NA;Pyrgus carlinae;0.932469285660406;  
MN145225;Lepidoptera;Polyommatus icarus;NA;0.166;Polyommatus icarus;0.749935576218847;  
MN145226;Lepidoptera;Boloria euphrosyne;Boloria euphrosyne;0.001;Boloria euphrosyne;0.999985640170951;  
MN145227;Lepidoptera;Brenthis ino;Brenthis ino;0.007;Brenthis ino;0.977157381961834;  
MN145228;Lepidoptera;Gonepteryx cleopatra;Gonepteryx cleopatra;0.998;Gonepteryx cleopatra;0.999118636582266;  
MN145229;Lepidoptera;Pyrgus malvoides;NA;NA;Pyrgus malvoides;0.885119112100638;

MN145230;Lepidoptera;Brintesia circe;Brintesia circe;NA;Brintesia circe;0.999999813082031;  
MN145231;Lepidoptera;Cupido minimus;NA;0.009;Cupido minimus;0.999791453712643;  
MN145233;Lepidoptera;Pyrgus carlinae;NA;NA;Pyrgus carlinae;0.854199018204849;  
MN145234;Lepidoptera;Apatura iris;Apatura iris;1;Apatura iris;0.99999999999972;  
MN145236;Lepidoptera;Aricia cramera;Aricia cramera;1;Aricia cramera;0.999993731037033;  
MN145238;Lepidoptera;Pyrgus carthami;Pyrgus carthami;1;Pyrgus carthami;0.999995592447668;  
MN145239;Lepidoptera;Hamearis lucina;NA;NA;Hamearis lucina;0.99999999972005;  
MN145241;Lepidoptera;Euphydryas maturna;Euphydryas maturna;1;Euphydryas  
maturna;0.893551409890867;  
MN145242;Lepidoptera;Satyrium esculi;Satyrium esculi;1;Satyrium esculi;0.999999957367948;  
MN145243;Lepidoptera;Pyrgus malvoides;NA;0.176;Pyrgus malvoides;0.940490890379026;  
MN145245;Lepidoptera;Melitaea parthenoides;Melitaea parthenoides;1;Melitaea  
parthenoides;0.999999980399821;  
MN145248;Lepidoptera;Thymelicus sylvestris;NA;0.324;Thymelicus sylvestris;0.999940778442454;  
MN145249;Lepidoptera;Plebejus idas;NA;0.004;NA;0.999605698719885;  
MN145251;Lepidoptera;Aporia crataegi;NA;0.009;Aporia crataegi;0.999996613335036;  
MN145253;Lepidoptera;Hipparchia statilinus;Hipparchia statilinus;1;Hipparchia  
statilinus;0.99999999999716;  
MN145254;Lepidoptera;Gegenes nostrodamus;Gegenes nostrodamus;1;Gegenes  
nostrodamus;0.999999996883645;  
MN145255;Lepidoptera;Polyommatus icarus;NA;0.062;Polyommatus icarus;0.832205349235841;  
MN145257;Lepidoptera;Polyommatus thersites;Polyommatus thersites;1;Polyommatus  
thersites;0.999999851431494;  
MN145258;Lepidoptera;Lasiommata megera;Lasiommata megera;1;Lasiommata megera;0.999928528239676;  
MN145259;Lepidoptera;Coenonympha arcania;NA;0.135;NA;0.9999999999993;  
MN145260;Lepidoptera;Maniola jurtina;NA;NA;Maniola jurtina;0.973823960006955;  
MN145261;Lepidoptera;Boloria euphrosyne;Boloria euphrosyne;1;Boloria  
euphrosyne;0.999999888858929;  
MN145262;Lepidoptera;Aricia eumedon;Eumedonia eumedon;0.001;Eumedonia eumedon;0.997789624617489;  
MN145263;Lepidoptera;Argynnis aglaja;NA;0.005;Speyeria aglaja;0.896438572419641;  
MN145264;Lepidoptera;Maniola jurtina;NA;NA;NA;0.99999999991;  
MN145265;Lepidoptera;Satyrium spini;Satyrium spini;1;Satyrium spini;0.999997334596599;  
MN145267;Lepidoptera;Plebejus idas;NA;0.007;NA;0.999546324331549;  
MN145268;Lepidoptera;Lasiommata maera;Lasiommata maera;1;Lasiommata maera;0.99999510792253;  
MN145269;Lepidoptera;Thymelicus lineola;Thymelicus lineola;1;Thymelicus  
lineola;0.999999013123503;  
MN145271;Lepidoptera;Argynnis paphia;Argynnis paphia;1;Argynnis paphia;0.999999991389927;  
MN145272;Lepidoptera;Coenonympha oedippus;Coenonympha oedippus;1;Coenonympha  
oedippus;0.999999999999744;  
MN145273;Lepidoptera;Satyrus ferula;NA;0.012;Satyrus ferula;0.988927447682062;  
MN145274;Lepidoptera;Coenonympha gardetta;NA;0.004;NA;0.99999999999983;  
MN145275;Lepidoptera;Vanessa cardui;Vanessa cardui;1;Vanessa cardui;0.999999850530696;  
MN145277;Lepidoptera;Maniola jurtina;NA;0.001;Maniola jurtina;0.939220105860875;  
MN145278;Lepidoptera;Lysandra coridon;NA;NA;Lysandra coridon;0.749217519592352;  
MN145280;Lepidoptera;Gonepteryx cleopatra;Gonepteryx cleopatra;0.998;Gonepteryx  
cleopatra;0.999118636582266;  
MN145281;Lepidoptera;Melitaea nevadensis;NA;0.001;NA;0.999999999896095;  
MN145282;Lepidoptera;Hipparchia fagi;NA;NA;Hipparchia fagi;0.93078716147162;  
MN145284;Lepidoptera;Maniola jurtina;NA;0.038;NA;0.99999999999524;  
MN145285;Lepidoptera;Maniola jurtina;NA;NA;NA;0.99999999988982;  
MN145287;Lepidoptera;Erebia epiphron;NA;NA;Erebia epiphron;0.994401488812176;  
MN145288;Lepidoptera;Euphydryas maturna;NA;NA;NA;0.99999999996973;  
MN145289;Lepidoptera;Polyommatus escheri;Polyommatus escheri;1;Polyommatus  
escheri;0.99999996508507;  
MN145290;Lepidoptera;Fabriciana adippe;Fabriciana adippe;0.007;Fabriciana  
adippe;0.876018745965171;  
MN145291;Lepidoptera;Satyrium spini;Satyrium spini;1;Satyrium spini;0.999995896183898;  
MN145292;Lepidoptera;Thymelicus acteon;Thymelicus acteon;1;Thymelicus acteon;0.9999999752248;  
MN145293;Lepidoptera;Polyommatus icarus;NA;0.07;Polyommatus icarus;0.861997145553611;  
MN145295;Lepidoptera;Argynnis paphia;Argynnis paphia;1;Argynnis paphia;0.999999991389927;  
MN145296;Lepidoptera;Thymelicus acteon;Thymelicus acteon;1;Thymelicus acteon;0.99999992977934;  
MN145298;Lepidoptera;Polyommatus icarus;NA;0.004;Polyommatus icarus;0.963846856760863;  
MN145299;Lepidoptera;Lasiommata megera;Lasiommata megera;1;Lasiommata megera;0.999928528239676;  
MN145301;Lepidoptera;Carterocephalus palaemon;Carterocephalus palaemon;0.013;Carterocephalus  
palaemon;0.802650615099358;  
MN145302;Lepidoptera;Aricia agestis;NA;0.067;Aricia agestis;0.999509743227786;  
MN145303;Lepidoptera;Thymelicus acteon;Thymelicus acteon;1;Thymelicus acteon;0.9999999752248;  
MN145304;Lepidoptera;Erebia styx;NA;NA;Erebia styx;0.872643767482019;  
MN145305;Lepidoptera;Aricia cramera;Aricia cramera;1;Aricia cramera;0.999993731037033;  
MN145308;Lepidoptera;Fabriciana niobe;NA;0.005;Fabriciana niobe;0.992125835358755;  
MN145309;Lepidoptera;Fabriciana adippe;NA;NA;Fabriciana adippe;0.900255826442102;  
MN145310;Lepidoptera;Lysandra coridon;Lysandra coridon;NA;NA;NA;0.998017994491822;  
MN145311;Lepidoptera;Polyommatus icarus;Polyommatus icarus;0.001;Polyommatus  
icarus;0.999634361968572;  
MN145313;Lepidoptera;Lysandra coridon;Lysandra coridon;NA;Lysandra coridon;0.935848180514696;  
MN145315;Lepidoptera;Melitaea parthenoides;Melitaea parthenoides;1;Melitaea  
parthenoides;0.999999993530452;  
MN145316;Lepidoptera;Maniola jurtina;NA;NA;NA;0.99999999988982;

MN145317;Lepidoptera;Cupido alcetas;NA;0.218;Cupido alcetas;0.833501983138177;  
MN145318;Lepidoptera;Melitaea nevadensis;NA;0.016;Melitaea celadussa;0.727164742336627;  
MN145319;Lepidoptera;Coenonympha pamphilus;Coenonympha pamphilus;1;Coenonympha  
pamphilus;0.99999999999744;  
MN145321;Lepidoptera;Gonepteryx cleopatra;Gonepteryx cleopatra;0.998;Gonepteryx  
cleopatra;0.999118636582266;  
MN145322;Lepidoptera;Satyrus ferula;Satyrus ferula;0.001;Satyrus ferula;0.992107254386621;  
MN145324;Lepidoptera;Aricia cramera;Aricia cramera;1;Aricia cramera;0.999993731037033;  
MN145326;Lepidoptera;Aricia cramera;Aricia cramera;1;Aricia cramera;0.999993731037033;  
MN145327;Lepidoptera;Coenonympha arcania;NA;0.001;NA;0.99999999999975;  
MN145328;Lepidoptera;Maniola jurtina;NA;0.001;Maniola jurtina;0.939220105860875;  
MN145329;Lepidoptera;Maniola jurtina;NA;0.012;Maniola jurtina;0.91755716175482;  
MN145330;Lepidoptera;Maniola jurtina;NA;0.008;Maniola jurtina;0.881964271783318;  
MN145331;Lepidoptera;Boloria selene;NA;0.281;Boloria selene;0.99999606392712;  
MN145332;Lepidoptera;Maniola jurtina;NA;0.157;Maniola jurtina;0.72935823378201;  
MN145334;Lepidoptera;Coenonympha pamphilus;Coenonympha pamphilus;1;Coenonympha  
pamphilus;0.99999999999687;  
MN145336;Lepidoptera;Melitaea nevadensis;NA;0.001;NA;0.99999999891422;  
MN145337;Lepidoptera;Maniola jurtina;NA;0.119;Maniola jurtina;0.853294047700275;  
MN145338;Lepidoptera;Plebejus argus;NA;0.118;Plebejus argus;0.977297982426809;  
MN145340;Lepidoptera;Erebia pandrose;Erebia pandrose;0.005;Erebia pandrose;0.988323455312149;  
MN145342;Lepidoptera;Celastrina argiolus;Celastrina argiolus;1;Celastrina  
argiolus;0.999527385150531;  
MN145343;Lepidoptera;Satyrium spini;Satyrium spini;1;Satyrium spini;0.999999721054916;  
MN145344;Lepidoptera;Maniola tithonus;Pyronia tithonus;1;Pyronia tithonus;1;  
MN145346;Lepidoptera;Lycaena phlaeas;Lycaena phlaeas;1;Lycaena phlaeas;0.99999994740023;  
MN145347;Lepidoptera;Callophrys rubi;NA;0.019;Callophrys rubi;0.998201459637982;  
MN145348;Lepidoptera;Maniola jurtina;NA;0.012;Maniola jurtina;0.91755716175482;  
MN145349;Lepidoptera;Maniola jurtina;NA;NA;Maniola jurtina;0.979727053537369;  
MN145351;Lepidoptera;Pyrgus malvoides;NA;0.176;Pyrgus malvoides;0.940490890379026;  
MN145353;Lepidoptera;Lasiommata maera;Lasiommata maera;1;Lasiommata maera;0.99999510792253;  
MN145354;Lepidoptera;Pyrgus armoricanus;Pyrgus armoricanus;1;Pyrgus  
armoricanus;0.999997353848817;  
MN145355;Lepidoptera;Coenonympha pamphilus;Coenonympha pamphilus;1;Coenonympha  
pamphilus;0.999999999999744;  
MN145357;Lepidoptera;Maniola jurtina;NA;0.001;Maniola jurtina;0.939220105860875;  
MN145358;Lepidoptera;Brintesia circe;Brintesia circe;1;Brintesia circe;0.99999951254154;  
MN145360;Lepidoptera;Fabriciana adippe;NA;NA;Fabriciana adippe;0.907696205558758;  
MN145361;Lepidoptera;Aphantopus hyperantus;Aphantopus hyperantus;NA;Aphantopus  
hyperantus;0.999997297823497;  
MN145362;Lepidoptera;Celastrina argiolus;Celastrina argiolus;1;Celastrina  
argiolus;0.999527385150531;  
MN145365;Lepidoptera;Lasiommata maera;Lasiommata maera;1;Lasiommata maera;0.99999510792253;  
MN145366;Lepidoptera;Erebia montana;Erebia montana;1;Erebia montana;0.999901488545922;  
MN145367;Lepidoptera;Gonepteryx rhamni;NA;0.474;Gonepteryx rhamni;0.982076396127858;  
MN145368;Lepidoptera;Glaucopsyche alexis;NA;NA;Glaucopsyche alexis;0.979381169624069;  
MN145370;Lepidoptera;Hipparchia statilinus;Hipparchia statilinus;1;Hipparchia  
statilinus;0.999999999999858;  
MN145371;Lepidoptera;Coenonympha gardetta;NA;0.001;Coenonympha gardetta;0.731095812176462;  
MN145373;Lepidoptera;Ochlodes sylvanus;NA;0.316;Ochlodes sylvanus;0.996318754838625;  
MN145375;Lepidoptera;Lycaena tityrus;Lycaena tityrus;1;Lycaena tityrus;0.999987784105493;  
MN145376;Lepidoptera;Erebia euryale;NA;NA;Erebia euryale;0.919518760623792;  
MN145377;Lepidoptera;Satyrium ilicis;Satyrium ilicis;1;Satyrium ilicis;0.999999987901305;  
MN145378;Lepidoptera;Lysandra coridon;NA;NA;NA;0.998734722982874;  
MN145381;Lepidoptera;Coenonympha arcania;NA;0.105;NA;0.999999999999971;  
MN145383;Lepidoptera;Thymelicus lineola;Thymelicus lineola;1;Thymelicus  
lineola;0.999971535093703;  
MN145384;Lepidoptera;Erebia euryale;NA;NA;Erebia euryale;0.919518760623792;  
MN145385;Lepidoptera;Ochlodes sylvanus;NA;0.118;Ochlodes sylvanus;0.997343687527824;  
MN145386;Lepidoptera;Plebejus argus;NA;0.054;Plebejus argus;0.988960797443415;  
MN145388;Lepidoptera;Nymphalis c-album;NA;0.08;NA;0.999996025433302;  
MN145389;Lepidoptera;Erynnis tages;Erynnis tages;1;Erynnis tages;0.99999607484105;  
MN145390;Lepidoptera;Fabriciana adippe;NA;NA;Fabriciana adippe;0.932856307379829;  
MN145391;Lepidoptera;Erebia pronoe;Erebia pronoe;1;Erebia pronoe;0.999567958198288;  
MN145392;Lepidoptera;Thymelicus lineola;Thymelicus lineola;1;Thymelicus lineola;0.9999923143501;  
MN145394;Lepidoptera;Coenonympha gardetta;NA;0.113;Coenonympha arcania;0.74313160272224;  
MN145400;Lepidoptera;Thecla betulae;Thecla betulae;1;Thecla betulae;0.99999999979821;  
MN145401;Lepidoptera;Erynnis tages;Erynnis tages;1;Erynnis tages;0.999999537488513;  
MN145402;Lepidoptera;Pyrgus malvoides;NA;0.176;Pyrgus malvoides;0.940490890379026;  
MN145403;Lepidoptera;Hamearis lucina;NA;NA;Hamearis lucina;0.999999999984141;  
MN145405;Lepidoptera;Gonepteryx cleopatra;Gonepteryx cleopatra;0.998;Gonepteryx  
cleopatra;0.999118636582266;  
MN145406;Lepidoptera;Arethusana arethusa;Arethusana arethusa;0.028;Arethusana  
arethusa;0.999960203202505;  
MN145407;Lepidoptera;Callophrys rubi;NA;0.003;Callophrys rubi;0.997328639918919;  
MN145409;Lepidoptera;Cupido argiades;NA;0.499;NA;0.999999999984682;  
MN145410;Lepidoptera;Aricia cramera;Aricia cramera;1;Aricia cramera;0.999993731037033;  
MN145411;Lepidoptera;Callophrys rubi;NA;0.019;Callophrys rubi;0.998201459637982;

MN145413;Lepidoptera;Coenonympha arcania;NA;0.001;Coenonympha gardetta;0.756326968210269;  
MN145414;Lepidoptera;Arethusana arethusana;NA;0.062;Arethusana arethusana;0.999962489703143;  
MN145415;Lepidoptera;Aricia cramera;Aricia cramera;1;Aricia cramera;0.999993731037033;  
MN145417;Lepidoptera;Aricia cramera;Aricia cramera;1;Aricia cramera;0.999993731037033;  
MN145419;Lepidoptera;Cupido minimus;NA;0.002;Cupido minimus;0.999870161340428;  
MN145420;Lepidoptera;Maniola jurtina;NA;0.012;Maniola jurtina;0.91755716175482;  
MN145421;Lepidoptera;Carcharodus baeticus;Carcharodus baeticus;1;Carcharodus  
baeticus;0.999956286218202;  
MN145422;Lepidoptera;Colias alfacariensis;Colias alfacariensis;0.001;Colias  
alfacariensis;0.999926026317526;  
MN145432;Lepidoptera;Coenonympha glycerion;NA;0.28;Coenonympha glycerion;0.999998036263913;  
MN145424;Lepidoptera;Scolitantides orion;Scolitantides orion;1;Scolitantides  
orion;0.999999882574;  
MN145426;Lepidoptera;Coenonympha pamphilus;Coenonympha pamphilus;1;Coenonympha  
pamphilus;0.999999999999886;  
MN145428;Lepidoptera;Arethusana arethusana;Arethusana arethusana;1;Arethusana  
arethusana;0.99999787144355;  
MN145431;Lepidoptera;Aricia cramera;Aricia cramera;1;Aricia cramera;0.99999560825095;  
MN145432;Lepidoptera;Thymelicus acteon;Thymelicus acteon;1;Thymelicus acteon;0.9999991353405;  
MN145434;Lepidoptera;Ochlodes sylvanus;NA;0.316;Ochlodes sylvanus;0.996318754838625;  
MN145435;Lepidoptera;Maniola jurtina;NA;0.177;NA;0.99999999998974;  
MN145436;Lepidoptera;Lysandra hispana;NA;NA;0.998346382460118;  
MN145437;Lepidoptera;Lampides boeticus;Lampides boeticus;1;Lampides boeticus;0.99999999545906;  
MN145438;Lepidoptera;Celastrina argiolus;Celastrina argiolus;1;Celastrina  
argiolus;0.999527385150531;  
MN145439;Lepidoptera;Colias crocea;NA;0.059;NA;0.99999999999738;  
MN145441;Lepidoptera;Hipparchia leighebi;Hipparchia leighebi;0.999;Hipparchia  
leighebi;0.952274573070593;  
MN145442;Lepidoptera;Glaucopsyche alexis;NA;NA;Glaucopsyche alexis;0.97933749849394;  
MN145444;Lepidoptera;Coenonympha pamphilus;Coenonympha pamphilus;1;Coenonympha  
pamphilus;0.999999999999744;  
MN145446;Lepidoptera;Euphydryas maturna;NA;0.126;Euphydryas maturna;0.885705216462044;  
MN145447;Lepidoptera;Boloria titania;Boloria titania;0.001;Boloria titania;0.99983358374111;  
MN145448;Lepidoptera;Glaucopsyche alexis;Glaucopsyche alexis;0.001;Glaucopsyche  
alexis;0.94042380088325;  
MN145450;Lepidoptera;Vanessa cardui;Vanessa cardui;1;Vanessa cardui;0.999999459983318;  
MN181613;Lepidoptera;Pieris napi;NA;0.001;Pieris napi;0.839433560745988;  
MN181614;Lepidoptera;Pieris napi;NA;0.001;Pieris napi;0.839433560745988;  
MN181615;Lepidoptera;Pieris napi;NA;NA;Pieris napi;0.920233870714493;  
MN181617;Lepidoptera;Pieris napi;NA;NA;Pieris napi;0.920233870714493;  
MN181618;Lepidoptera;Pieris napi;NA;NA;Pieris napi;0.876427568095063;  
MN181848;Lepidoptera;Pieris rapae;Pieris rapae;0.005;Pieris rapae;0.99998154360792;  
MN181849;Lepidoptera;Pieris rapae;Pieris rapae;0.005;Pieris rapae;0.99998154360792;  
MN181850;Lepidoptera;Pieris rapae;Pieris rapae;0.005;Pieris rapae;0.99998154360792;  
MN181852;Lepidoptera;Pieris rapae;Pieris rapae;0.005;Pieris rapae;0.99998154360792;  
MN181889;Lepidoptera;Pieris rapae;Pieris rapae;0.005;Pieris rapae;0.99998154360792;  
MN181890;Lepidoptera;Pieris rapae;Pieris rapae;0.015;Pieris rapae;0.999955793563084;  
MN181891;Lepidoptera;Pieris rapae;NA;NA;Pieris rapae;0.999890380117884;  
MN181894;Lepidoptera;Pieris rapae;NA;NA;Pieris rapae;0.999890380117884;  
MN181895;Lepidoptera;Pieris rapae;NA;0.038;Pieris rapae;0.999909267055382;  
MN181896;Lepidoptera;Pieris rapae;Pieris rapae;1;Pieris rapae;0.999986461994646;  
MN181898;Lepidoptera;Pieris rapae;Pieris rapae;0.005;Pieris rapae;0.99998154360792;  
MN181899;Lepidoptera;Pieris rapae;Pieris rapae;0.005;Pieris rapae;0.999950937090255;  
MN181900;Lepidoptera;Pieris rapae;NA;0.067;Pieris rapae;0.999893985731148;  
MN181901;Lepidoptera;Pieris rapae;Pieris rapae;0.008;Pieris rapae;0.999897092351311;  
MN181902;Lepidoptera;Pieris rapae;Pieris rapae;0.005;Pieris rapae;0.99998154360792;  
MN182017;Lepidoptera;Pieris rapae;NA;NA;Pieris rapae;0.999756880170177;  
MN182018;Lepidoptera;Pieris rapae;Pieris rapae;0.005;Pieris rapae;0.99998154360792;  
MN182073;Lepidoptera;Pieris rapae;Pieris rapae;0.005;Pieris rapae;0.99998154360792;  
MN182107;Lepidoptera;Pieris rapae;NA;0.116;Pieris rapae;0.999749379223387;  
MN182108;Lepidoptera;Pieris rapae;NA;0.116;Pieris rapae;0.999749379223387;  
MN182109;Lepidoptera;Pieris rapae;NA;0.305;Pieris rapae;0.999828182488811;  
MN182110;Lepidoptera;Pieris rapae;NA;0.116;Pieris rapae;0.999749379223387;  
MN182111;Lepidoptera;Pieris rapae;NA;0.305;Pieris rapae;0.999828182488811;  
MN182112;Lepidoptera;Pieris rapae;NA;0.305;Pieris rapae;0.999828182488811;  
MN182113;Lepidoptera;Pieris rapae;NA;0.116;Pieris rapae;0.999749379223387;  
MN182114;Lepidoptera;Pieris rapae;NA;0.116;Pieris rapae;0.999749379223387;  
MN182115;Lepidoptera;Pieris rapae;NA;0.305;Pieris rapae;0.999828182488811;  
MN182116;Lepidoptera;Pieris rapae;NA;0.116;Pieris rapae;0.999749379223387;  
MN182117;Lepidoptera;Pieris rapae;NA;0.305;Pieris rapae;0.999828182488811;  
MN182118;Lepidoptera;Pieris rapae;NA;0.305;Pieris rapae;0.999828182488811;  
MN182119;Lepidoptera;Pieris rapae;NA;0.067;Pieris rapae;0.999893985731148;  
MN182167;Lepidoptera;Pieris rapae;Pieris rapae;0.005;Pieris rapae;0.99998154360792;  
MN182168;Lepidoptera;Pieris rapae;Pieris rapae;0.015;Pieris rapae;0.999955793563084;  
MN182169;Lepidoptera;Pieris rapae;Pieris rapae;0.001;Pieris rapae;0.999959316486055;  
MN182170;Lepidoptera;Pieris rapae;Pieris rapae;1;Pieris rapae;0.999985779108038;  
MN182171;Lepidoptera;Pieris rapae;Pieris rapae;0.005;Pieris rapae;0.99998154360792;  
MN182172;Lepidoptera;Pieris rapae;NA;0.067;Pieris rapae;0.999893985731148;



|           |              |        |                 |        |                          |        |                          |
|-----------|--------------|--------|-----------------|--------|--------------------------|--------|--------------------------|
| MN182173; | Lepidoptera; | Pieris | rapae;NA;0.116; | Pieris | rapae;0.999749379223387; |        |                          |
| MN182174; | Lepidoptera; | Pieris | rapae;          | Pieris | rapae;0.005;             | Pieris | rapae;0.99998154360792;  |
| MN182175; | Lepidoptera; | Pieris | rapae;          | Pieris | rapae;0.005;             | Pieris | rapae;0.99998154360792;  |
| MN182176; | Lepidoptera; | Pieris | rapae;          | Pieris | rapae;0.015;             | Pieris | rapae;0.999955793563084; |
| MN182177; | Lepidoptera; | Pieris | rapae;          | Pieris | rapae;0.005;             | Pieris | rapae;0.99998154360792;  |
| MN182178; | Lepidoptera; | Pieris | rapae;          | Pieris | rapae;0.003;             | Pieris | rapae;0.999972063312845; |
| MN182179; | Lepidoptera; | Pieris | rapae;          | Pieris | rapae;0.005;             | Pieris | rapae;0.99998154360792;  |
| MN182180; | Lepidoptera; | Pieris | rapae;          | Pieris | rapae;0.003;             | Pieris | rapae;0.99996628158202;  |
| MN182181; | Lepidoptera; | Pieris | rapae;          | Pieris | rapae;1;                 | Pieris | rapae;0.999985779108038; |
| MN182182; | Lepidoptera; | Pieris | rapae;          | Pieris | rapae;0.005;             | Pieris | rapae;0.99998154360792;  |
| MN182183; | Lepidoptera; | Pieris | rapae;NA;0.041; | Pieris | rapae;0.999828201601997; |        |                          |
| MN182184; | Lepidoptera; | Pieris | rapae;          | Pieris | rapae;0.015;             | Pieris | rapae;0.999955793563084; |
| MN182185; | Lepidoptera; | Pieris | rapae;          | Pieris | rapae;0.003;             | Pieris | rapae;0.999972063312845; |
| MN182186; | Lepidoptera; | Pieris | rapae;          | Pieris | rapae;0.003;             | Pieris | rapae;0.999972063312845; |
| MN182187; | Lepidoptera; | Pieris | rapae;NA;0.067; | Pieris | rapae;0.999893985731148; |        |                          |
| MN182188; | Lepidoptera; | Pieris | rapae;          | Pieris | rapae;0.001;             | Pieris | rapae;0.999987986469251; |
| MN182189; | Lepidoptera; | Pieris | rapae;          | Pieris | rapae;0.005;             | Pieris | rapae;0.99998154360792;  |
| MN182190; | Lepidoptera; | Pieris | rapae;          | Pieris | rapae;NA;                | Pieris | rapae;0.999934317499605; |
| MN182193; | Lepidoptera; | Pieris | rapae;          | Pieris | rapae;0.002;             | Pieris | rapae;0.999960984049219; |
| MN182195; | Lepidoptera; | Pieris | rapae;          | Pieris | rapae;0.005;             | Pieris | rapae;0.99998154360792;  |
| MN182196; | Lepidoptera; | Pieris | rapae;          | Pieris | rapae;0.005;             | Pieris | rapae;0.99998154360792;  |
| MN182197; | Lepidoptera; | Pieris | rapae;          | Pieris | rapae;0.005;             | Pieris | rapae;0.99998154360792;  |
| MN182198; | Lepidoptera; | Pieris | rapae;          | Pieris | rapae;0.015;             | Pieris | rapae;0.999955793563084; |
| MN182199; | Lepidoptera; | Pieris | rapae;          | Pieris | rapae;0.015;             | Pieris | rapae;0.999955793563084; |
| MN182200; | Lepidoptera; | Pieris | rapae;          | Pieris | rapae;0.005;             | Pieris | rapae;0.99998154360792;  |
| MN182201; | Lepidoptera; | Pieris | rapae;          | Pieris | rapae;0.005;             | Pieris | rapae;0.99998154360792;  |
| MN182202; | Lepidoptera; | Pieris | rapae;          | Pieris | rapae;0.005;             | Pieris | rapae;0.99998154360792;  |
| MN182203; | Lepidoptera; | Pieris | rapae;          | Pieris | rapae;0.003;             | Pieris | rapae;0.999974736023425; |
| MN182204; | Lepidoptera; | Pieris | rapae;          | Pieris | rapae;0.005;             | Pieris | rapae;0.99998154360792;  |
| MN182205; | Lepidoptera; | Pieris | rapae;          | Pieris | rapae;0.003;             | Pieris | rapae;0.999972063312845; |
| MN182206; | Lepidoptera; | Pieris | rapae;          | Pieris | rapae;0.003;             | Pieris | rapae;0.999972063312845; |
| MN182207; | Lepidoptera; | Pieris | rapae;          | Pieris | rapae;NA;                | Pieris | rapae;0.999622652300057; |
| MN182208; | Lepidoptera; | Pieris | rapae;          | Pieris | rapae;0.003;             | Pieris | rapae;0.999972063312845; |
| MN182209; | Lepidoptera; | Pieris | rapae;          | Pieris | rapae;0.005;             | Pieris | rapae;0.99998154360792;  |
| MN182210; | Lepidoptera; | Pieris | rapae;          | Pieris | rapae;1;                 | Pieris | rapae;0.999985779108038; |
| MN182211; | Lepidoptera; | Pieris | rapae;          | Pieris | rapae;1;                 | Pieris | rapae;0.99991926760391;  |
| MN182213; | Lepidoptera; | Pieris | rapae;          | Pieris | rapae;0.005;             | Pieris | rapae;0.99998154360792;  |
| MN182214; | Lepidoptera; | Pieris | rapae;          | Pieris | rapae;0.005;             | Pieris | rapae;0.99998154360792;  |
| MN182215; | Lepidoptera; | Pieris | rapae;          | Pieris | rapae;0.005;             | Pieris | rapae;0.99998154360792;  |
| MN182216; | Lepidoptera; | Pieris | rapae;          | Pieris | rapae;0.005;             | Pieris | rapae;0.99998154360792;  |
| MN182217; | Lepidoptera; | Pieris | rapae;NA;0.038; | Pieris | rapae;0.999909267055382; |        |                          |
| MN182218; | Lepidoptera; | Pieris | rapae;NA;0.067; | Pieris | rapae;0.999893985731148; |        |                          |
| MN182219; | Lepidoptera; | Pieris | rapae;          | Pieris | rapae;0.005;             | Pieris | rapae;0.99998154360792;  |
| MN182220; | Lepidoptera; | Pieris | rapae;          | Pieris | rapae;0.027;             | Pieris | rapae;0.999870780081008; |
| MN182221; | Lepidoptera; | Pieris | rapae;          | Pieris | rapae;0.003;             | Pieris | rapae;0.999972063312845; |
| MN182222; | Lepidoptera; | Pieris | rapae;          | Pieris | rapae;0.001;             | Pieris | rapae;0.999987329754793; |
| MN1822    |              |        |                 |        |                          |        |                          |

MN182261;Lepidoptera;Pieris rapae;Pieris rapae;0.005;Pieris rapae;0.99998154360792;  
 MN182262;Lepidoptera;Pieris rapae;NA;0.169;Pieris rapae;0.999557006682655;  
 MN182263;Lepidoptera;Pieris rapae;Pieris rapae;0.005;Pieris rapae;0.99998154360792;  
 MN182264;Lepidoptera;Pieris rapae;Pieris rapae;0.005;Pieris rapae;0.99998154360792;  
 MN182265;Lepidoptera;Pieris rapae;Pieris rapae;0.015;Pieris rapae;0.999955793563084;  
 MN182266;Lepidoptera;Pieris rapae;Pieris rapae;0.005;Pieris rapae;0.99998154360792;  
 MN182267;Lepidoptera;Pieris rapae;Pieris rapae;0.015;Pieris rapae;0.999955793563084;  
 MN182268;Lepidoptera;Pieris rapae;NA;0.067;Pieris rapae;0.999893985731148;  
 MN182269;Lepidoptera;Pieris rapae;NA;0.038;Pieris rapae;0.999909267055382;  
 MN182270;Lepidoptera;Pieris rapae;Pieris rapae;0.015;Pieris rapae;0.999955793563084;  
 MN182271;Lepidoptera;Pieris rapae;NA;0.038;Pieris rapae;0.999909267055382;  
 MN182272;Lepidoptera;Pieris rapae;Pieris rapae;0.008;Pieris rapae;0.999835979645401;  
 MN182273;Lepidoptera;Pieris rapae;Pieris rapae;0.005;Pieris rapae;0.99998154360792;  
 MN182274;Lepidoptera;Pieris rapae;Pieris rapae;0.014;Pieris rapae;0.999961623126727;  
 MN182275;Lepidoptera;Pieris rapae;NA;0.116;Pieris rapae;0.999749379223387;  
 MN182276;Lepidoptera;Pieris rapae;Pieris rapae;0.003;Pieris rapae;0.99996628158202;  
 MN182277;Lepidoptera;Pieris rapae;NA;0.067;Pieris rapae;0.999893985731148;  
 MN182278;Lepidoptera;Pieris rapae;Pieris rapae;0.003;Pieris rapae;0.99996628158202;  
 MN182279;Lepidoptera;Pieris rapae;Pieris rapae;0.005;Pieris rapae;0.99998154360792;  
 MN182280;Lepidoptera;Pieris rapae;Pieris rapae;0.015;Pieris rapae;0.999955793563084;  
 MN182281;Lepidoptera;Pieris rapae;Pieris rapae;0.001;Pieris rapae;0.999983782047286;  
 MN182282;Lepidoptera;Pieris rapae;Pieris rapae;0.003;Pieris rapae;0.999972063312845;  
 MN182283;Lepidoptera;Pieris rapae;Pieris rapae;0.005;Pieris rapae;0.99998154360792;  
 MN182284;Lepidoptera;Pieris rapae;Pieris rapae;0.005;Pieris rapae;0.99998154360792;  
 MN182285;Lepidoptera;Pieris rapae;Pieris rapae;0.005;Pieris rapae;0.99998154360792;  
 MN182286;Lepidoptera;Pieris rapae;Pieris rapae;0.003;Pieris rapae;0.999972063312845;  
 MN182287;Lepidoptera;Pieris rapae;Pieris rapae;0.001;Pieris rapae;0.999989534119975;  
 MN182288;Lepidoptera;Pieris rapae;NA;0.067;Pieris rapae;0.999893985731148;  
 MN182289;Lepidoptera;Pieris rapae;NA;0.038;Pieris rapae;0.999909267055382;  
 MN182290;Lepidoptera;Pieris rapae;Pieris rapae;0.005;Pieris rapae;0.99998154360792;  
 MN182291;Lepidoptera;Pieris rapae;Pieris rapae;0.005;Pieris rapae;0.99998154360792;  
 MN182292;Lepidoptera;Pieris rapae;NA;0.067;Pieris rapae;0.999893985731148;  
 MN182293;Lepidoptera;Pieris rapae;NA;0.067;Pieris rapae;0.999893985731148;  
 MN182294;Lepidoptera;Pieris rapae;NA;NA;Pieris rapae;0.999910550721879;  
 MN182295;Lepidoptera;Pieris rapae;Pieris rapae;0.005;Pieris rapae;0.99998154360792;  
 MN182319;Lepidoptera;Pieris rapae;Pieris rapae;0.005;Pieris rapae;0.99998154360792;  
 MN183102;Lepidoptera;Thymelicus sylvestris;NA;0.004;Thymelicus sylvestris;0.998308003514278;  
 MN196663;Lepidoptera;Polyommatus celina;NA;0.072;Polyommatus celina;0.99999999953559;  
 MN196664;Lepidoptera;Polyommatus icarus;Polyommatus icarus;0.001;Polyommatus  
 icarus;0.999851522482238;  
 MN322831;Lepidoptera;Melitaea didyma;Melitaea didyma;0.002;Melitaea  
 liliputana;0.715540005480718;  
 MN322832;Lepidoptera;Melitaea didyma;Melitaea didyma;0.002;Melitaea  
 liliputana;0.715540005480718;  
 MN322834;Lepidoptera;Melitaea didyma;Melitaea didyma;NA;Melitaea didyma;0.993053463317121;  
 MN322836;Lepidoptera;Melitaea didyma;NA;NA;Melitaea didyma;0.975336875545609;  
 MN322837;Lepidoptera;Melitaea didyma;NA;0.029;Melitaea liliputana;0.853764459993326;  
 MN322838;Lepidoptera;Melitaea didyma;Melitaea didyma;1;Melitaea didyma;0.997449464914853;  
 MN322839;Lepidoptera;Melitaea didyma;Melitaea didyma;1;Melitaea didyma;0.997481631158949;  
 MN322840;Lepidoptera;Melitaea didyma;Melitaea didyma;NA;Melitaea didyma;0.988520743221049;  
 MN322841;Lepidoptera;Melitaea didyma;Melitaea didyma;1;Melitaea didyma;0.990041801198236;  
 MN322842;Lepidoptera;Melitaea didyma;Melitaea didyma;1;Melitaea didyma;0.994488200468557;  
 MN322843;Lepidoptera;Melitaea didyma;NA;NA;Melitaea didyma;0.981993619455166;  
 MN322844;Lepidoptera;Melitaea didyma;Melitaea didyma;1;Melitaea didyma;0.991352575104393;  
 MN322845;Lepidoptera;Melitaea didyma;NA;NA;Melitaea didyma;0.975336875545609;  
 MN322846;Lepidoptera;Melitaea didyma;Melitaea didyma;1;Melitaea didyma;0.996366765827355;  
 MN322849;Lepidoptera;Melitaea didyma;NA;0.077;Melitaea liliputana;0.848547153906651;  
 MN322850;Lepidoptera;Melitaea didyma;Melitaea didyma;1;Melitaea didyma;0.999945816868155;  
 MN322851;Lepidoptera;Melitaea didyma;Melitaea didyma;1;Melitaea didyma;0.992165146696479;  
 MN322852;Lepidoptera;Melitaea didyma;Melitaea didyma;1;Melitaea didyma;0.996366765827355;  
 MN322853;Lepidoptera;Melitaea didyma;Melitaea didyma;1;Melitaea didyma;0.992165146696479;  
 MN322855;Lepidoptera;Melitaea didyma;Melitaea didyma;NA;Melitaea didyma;0.980272836986251;  
 MN322856;Lepidoptera;Melitaea didyma;Melitaea didyma;1;Melitaea didyma;0.996366765827355;  
 MN322857;Lepidoptera;Melitaea didyma;Melitaea didyma;1;Melitaea didyma;0.984347861558038;  
 MN322859;Lepidoptera;Melitaea didyma;NA;NA;Melitaea didyma;0.981993619455166;  
 MN322861;Lepidoptera;Melitaea didyma;Melitaea didyma;1;Melitaea didyma;0.999429129005203;  
 MN322862;Lepidoptera;Melitaea didyma;Melitaea didyma;1;Melitaea didyma;0.996366765827355;  
 MN322864;Lepidoptera;Melitaea didyma;Melitaea didyma;1;Melitaea didyma;0.99958019737737;  
 MN322866;Lepidoptera;Melitaea didyma;Melitaea didyma;1;Melitaea didyma;0.99958019737737;  
 MN322867;Lepidoptera;Melitaea didyma;Melitaea didyma;1;Melitaea didyma;0.99958019737737;  
 MN322869;Lepidoptera;Melitaea didyma;Melitaea didyma;1;Melitaea didyma;0.992741920343347;  
 MN322870;Lepidoptera;Melitaea didyma;Melitaea didyma;1;Melitaea didyma;0.992165146696479;  
 MN322871;Lepidoptera;Melitaea didyma;Melitaea didyma;1;Melitaea didyma;0.992165146696479;  
 MN322872;Lepidoptera;Melitaea didyma;Melitaea didyma;1;Melitaea didyma;0.99958019737737;  
 MN322873;Lepidoptera;Melitaea didyma;NA;NA;Melitaea didyma;0.981993619455166;  
 MN322876;Lepidoptera;Melitaea didyma;NA;NA;Melitaea didyma;0.975336875545609;  
 MN322877;Lepidoptera;Melitaea deione;Melitaea deione;1;Melitaea deione;0.999999998970424;  
 MN322878;Lepidoptera;Melitaea didyma;Melitaea didyma;1;Melitaea didyma;0.992943754810873;

MN322880;Lepidoptera;Melitaea didyma;Melitaea didyma;NA;Melitaea didyma;0.988520743221049;  
MN322881;Lepidoptera;Melitaea didyma;NA;0.077;Melitaea liliputana;0.848547153906651;  
MN322882;Lepidoptera;Melitaea didyma;NA;NA;Melitaea didyma;0.981993619455166;  
MN322883;Lepidoptera;Melitaea didyma;Melitaea didyma;1;Melitaea didyma;0.999580197377737;  
MN322884;Lepidoptera;Melitaea didyma;Melitaea didyma;1;Melitaea didyma;0.999415712543767;  
MN829477;Lepidoptera;Callophrys rubi;NA;0.003;Callophrys rubi;0.936251834913072;  
MN829479;Lepidoptera;Erebia christi;Erebia christi;1;Erebia christi;0.979371100005714;  
MN829491;Lepidoptera;Iolana iolas;Iolana iolas;0.007;NA;0.857007042595556;  
MN888486;Lepidoptera;Parnassius apollo;Parnassius apollo;NA;NA;0.990986284674012;  
MN888487;Lepidoptera;Parnassius apollo;Parnassius apollo;NA;NA;0.990986284674012;  
MN888488;Lepidoptera;Parnassius apollo;Parnassius apollo;NA;NA;0.990986284674012;  
MN888489;Lepidoptera;Parnassius apollo;Parnassius apollo;NA;NA;0.990986284674012;  
MN992977;Lepidoptera;Aporia crataegi;NA;NA;Aporia crataegi;0.999993808661241;  
MN992980;Lepidoptera;Aporia crataegi;NA;NA;Aporia crataegi;0.99999273933953;  
MN992982;Lepidoptera;Aporia crataegi;NA;NA;Aporia crataegi;0.999993172436123;  
MN992987;Lepidoptera;Aporia crataegi;NA;NA;Aporia crataegi;0.999996899001592;  
MN992988;Lepidoptera;Aporia crataegi;NA;0.016;Aporia crataegi;0.999988134128216;  
MN992989;Lepidoptera;Aporia crataegi;NA;0.004;Aporia crataegi;0.999997193430277;  
MN992992;Lepidoptera;Aporia crataegi;NA;NA;Aporia crataegi;0.999996781126733;  
MN992995;Lepidoptera;Aporia crataegi;NA;NA;Aporia crataegi;0.999998459680561;  
MN992998;Lepidoptera;Aporia crataegi;Aporia crataegi;0.001;Aporia crataegi;0.999997641254563;  
MN992999;Lepidoptera;Aporia crataegi;NA;NA;Aporia crataegi;0.999996781126733;  
MN993003;Lepidoptera;Aporia crataegi;NA;NA;Aporia crataegi;0.999996899001592;  
MN993004;Lepidoptera;Aporia crataegi;NA;NA;Aporia crataegi;0.999996781126733;  
MN993005;Lepidoptera;Aporia crataegi;NA;0.005;Aporia crataegi;0.999998093133427;  
MN993006;Lepidoptera;Aporia crataegi;NA;NA;Aporia crataegi;0.999996899001592;  
MN993009;Lepidoptera;Aporia crataegi;NA;NA;Aporia crataegi;0.999996781126733;  
MN993010;Lepidoptera;Aporia crataegi;Aporia crataegi;NA;Aporia crataegi;0.999998243157657;  
MN993012;Lepidoptera;Aporia crataegi;NA;NA;Aporia crataegi;0.999996899001592;  
MN993016;Lepidoptera;Aporia crataegi;NA;NA;Aporia crataegi;0.999996469751274;  
MN993018;Lepidoptera;Aporia crataegi;NA;NA;Aporia crataegi;0.999997266436607;  
MN993019;Lepidoptera;Aporia crataegi;NA;NA;Aporia crataegi;0.999996899001592;  
MN993020;Lepidoptera;Aporia crataegi;NA;NA;Aporia crataegi;0.999996781126733;  
MN993022;Lepidoptera;Aporia crataegi;NA;NA;Aporia crataegi;0.999996899001592;  
MN993023;Lepidoptera;Aporia crataegi;NA;NA;Aporia crataegi;0.999996899001592;  
MN993025;Lepidoptera;Aporia crataegi;NA;NA;Aporia crataegi;0.999985074709541;  
MN993033;Lepidoptera;Aporia crataegi;NA;0.005;Aporia crataegi;0.999998093133427;  
MN993034;Lepidoptera;Aporia crataegi;NA;NA;Aporia crataegi;0.999990366426478;  
MN993035;Lepidoptera;Aporia crataegi;NA;NA;Aporia crataegi;0.999996899001592;  
MN993036;Lepidoptera;Aporia crataegi;NA;0.018;Aporia crataegi;0.999997879609256;  
MN993040;Lepidoptera;Aporia crataegi;NA;0.008;Aporia crataegi;0.999993952117662;  
MN993044;Lepidoptera;Aporia crataegi;NA;NA;Aporia crataegi;0.999996781126733;  
MN993045;Lepidoptera;Aporia crataegi;NA;0.005;Aporia crataegi;0.999998745591617;  
MN993046;Lepidoptera;Aporia crataegi;NA;0.001;Aporia crataegi;0.999998193245899;  
MN993047;Lepidoptera;Aporia crataegi;NA;NA;Aporia crataegi;0.999947681440647;  
MN993048;Lepidoptera;Aporia crataegi;NA;NA;Aporia crataegi;0.999996781126733;  
MN993050;Lepidoptera;Aporia crataegi;NA;NA;Aporia crataegi;0.999998459680561;  
MN993051;Lepidoptera;Aporia crataegi;NA;NA;Aporia crataegi;0.999996899001592;  
MN993058;Lepidoptera;Aporia crataegi;NA;NA;Aporia crataegi;0.99999767832369;  
MN993061;Lepidoptera;Aporia crataegi;NA;0.007;Aporia crataegi;0.9990403296458;  
MN993063;Lepidoptera;Aporia crataegi;NA;0.008;Aporia crataegi;0.999994505037455;  
MN993065;Lepidoptera;Aporia crataegi;NA;0.015;Aporia crataegi;0.999993803547922;  
MN993066;Lepidoptera;Aporia crataegi;NA;NA;Aporia crataegi;0.999996899001592;  
MN993067;Lepidoptera;Aporia crataegi;NA;NA;Aporia crataegi;0.999997266436607;  
MN993068;Lepidoptera;Aporia crataegi;NA;0.025;Aporia crataegi;0.999896746162973;  
MN993070;Lepidoptera;Aporia crataegi;NA;NA;Aporia crataegi;0.99989643592212;  
MT151338;Lepidoptera;Polyommatus icarus;NA;0.011;Polyommatus icarus;0.998084474257888;  
MT151339;Lepidoptera;Polyommatus icarus;NA;0.011;Polyommatus icarus;0.998084474257888;  
MT151340;Lepidoptera;Polyommatus icarus;NA;0.015;Polyommatus icarus;0.997543913174325;  
MT151341;Lepidoptera;Polyommatus icarus;NA;0.008;Polyommatus icarus;0.998926748843231;  
MT151342;Lepidoptera;Polyommatus icarus;NA;0.008;Polyommatus icarus;0.998926748843231;  
MT151343;Lepidoptera;Polyommatus icarus;NA;0.008;Polyommatus icarus;0.998926748843231;  
MT151344;Lepidoptera;Polyommatus icarus;NA;0.008;Polyommatus icarus;0.998926748843231;  
MT151345;Lepidoptera;Polyommatus icarus;NA;0.008;Polyommatus icarus;0.998926748843231;  
MT151346;Lepidoptera;Polyommatus icarus;NA;0.008;Polyommatus icarus;0.998926748843231;  
MT151347;Lepidoptera;Polyommatus icarus;NA;0.008;Polyommatus icarus;0.998926748843231;  
MT151348;Lepidoptera;Polyommatus icarus;NA;0.008;Polyommatus icarus;0.998926748843231;  
MT151349;Lepidoptera;Polyommatus icarus;NA;0.008;Polyommatus icarus;0.998926748843231;  
MT151350;Lepidoptera;Polyommatus icarus;NA;0.008;Polyommatus icarus;0.998926748843231;  
MT151351;Lepidoptera;Polyommatus icarus;NA;0.008;Polyommatus icarus;0.998926748843231;  
MT151352;Lepidoptera;Polyommatus icarus;NA;0.382;NA;0.999995358893254;  
MT151353;Lepidoptera;Polyommatus icarus;NA;0.382;NA;0.999995358893254;  
MT151354;Lepidoptera;Polyommatus icarus;NA;0.181;Polyommatus icarus;0.730055139767509;  
MT151355;Lepidoptera;Polyommatus icarus;NA;0.181;Polyommatus icarus;0.730055139767509;  
MT151356;Lepidoptera;Polyommatus icarus;NA;0.181;Polyommatus icarus;0.730055139767509;  
MT151357;Lepidoptera;Polyommatus icarus;NA;0.181;Polyommatus icarus;0.730055139767509;  
MT151358;Lepidoptera;Polyommatus icarus;NA;0.181;Polyommatus icarus;0.730055139767509;  
MT151359;Lepidoptera;Polyommatus icarus;NA;0.181;Polyommatus icarus;0.730055139767509;

MT151360;Lepidoptera;Polyommatus icarus;NA;0.181;Polyommatus icarus;0.730055139767509;  
MT151361;Lepidoptera;Polyommatus icarus;NA;0.181;Polyommatus icarus;0.730055139767509;  
MT151362;Lepidoptera;Polyommatus icarus;NA;0.181;Polyommatus icarus;0.730055139767509;  
MT151363;Lepidoptera;Polyommatus icarus;NA;0.181;Polyommatus icarus;0.730055139767509;  
MT151364;Lepidoptera;Polyommatus icarus;NA;0.181;Polyommatus icarus;0.730055139767509;  
MT151365;Lepidoptera;Polyommatus icarus;NA;0.181;Polyommatus icarus;0.730055139767509;  
MT151366;Lepidoptera;Polyommatus icarus;NA;0.181;Polyommatus icarus;0.730055139767509;  
MT151367;Lepidoptera;Polyommatus icarus;NA;0.181;Polyommatus icarus;0.730055139767509;  
MT151368;Lepidoptera;Polyommatus icarus;NA;0.002;NA;0.999962185134387;  
MT210322;Lepidoptera;Colias palaeno;NA;0.001;NA;0.99999999982869;  
MT260455;Lepidoptera;Hyponephele lycaon;Hyponephele lycaon;1;Hyponephele lycaon;0.99999999134332;  
MT260456;Lepidoptera;Anthocharis damone;Anthocharis damone;1;Anthocharis damone;0.999998457691272;  
MT260470;Lepidoptera;Callophrys rubi;Callophrys rubi;0.998;Callophrys rubi;0.99886512612359;  
MT260473;Lepidoptera;Lycaena phlaeas;Lycaena phlaeas;1;Lycaena phlaeas;0.999999994740023;  
MT260475;Lepidoptera;Chazara briseis;Chazara briseis;0.001;Chazara briseis;0.999984130678865;  
MT260477;Lepidoptera;Thymelicus acteon;Thymelicus acteon;1;Thymelicus acteon;0.9999999967919;  
MT260478;Lepidoptera;Thymelicus acteon;Thymelicus acteon;1;Thymelicus acteon;0.999999996401357;  
MT260479;Lepidoptera;Polyommatus daphnis;NA;0.062;Polyommatus daphnis;0.995724017767077;  
MT260482;Lepidoptera;Thymelicus lineola;Thymelicus lineola;1;Thymelicus lineola;0.999971535093703;  
MT260484;Lepidoptera;Satyrium ilicis;Satyrium ilicis;1;Satyrium ilicis;0.999999987901305;  
MT260485;Lepidoptera;Chazara briseis;Chazara briseis;0.001;Chazara briseis;0.999975148663962;  
MT260490;Lepidoptera;Polyommatus celina;Polyommatus celina;0.001;Polyommatus celina;0.999999999717033;  
MT260493;Lepidoptera;Polyommatus daphnis;Polyommatus daphnis;1;Polyommatus daphnis;0.997105033158344;  
MT260495;Lepidoptera;Lycaena phlaeas;Lycaena phlaeas;1;Lycaena phlaeas;0.999999994740023;  
MT260501;Lepidoptera;Thymelicus lineola;Thymelicus lineola;1;Thymelicus lineola;0.99996983250391;  
MT260502;Lepidoptera;Satyrium ilicis;Satyrium ilicis;1;Satyrium ilicis;0.999999987901305;  
MT260505;Lepidoptera;Polyommatus daphnis;NA;0.163;Polyommatus daphnis;0.992967582982541;  
MT260515;Lepidoptera;Polyommatus daphnis;Polyommatus daphnis;1;Polyommatus daphnis;0.997049219682684;  
MT260516;Lepidoptera;Pyrgus armoricanus;Pyrgus armoricanus;1;Pyrgus armoricanus;0.997478680096412;  
MT260517;Lepidoptera;Aricia eumedon;Eumedonia eumedon;0.001;Eumedonia eumedon;0.998426969289132;  
MT260523;Lepidoptera;Thymelicus lineola;Thymelicus lineola;1;Thymelicus lineola;0.999974900382941;  
MT260524;Lepidoptera;Pyrgus armoricanus;Pyrgus armoricanus;1;Pyrgus armoricanus;0.997478680096412;  
MT260525;Lepidoptera;Thymelicus lineola;Thymelicus lineola;1;Thymelicus lineola;0.999971535093703;  
MT260535;Lepidoptera;Anthocharis damone;Anthocharis damone;1;Anthocharis damone;0.999998457691272;  
MT260536;Lepidoptera;Lycaena phlaeas;Lycaena phlaeas;1;Lycaena phlaeas;0.999999994740023;  
MT260537;Lepidoptera;Satyrium w-album;NA;0.229;Satyrium w-album;0.948113184230419;  
MT260542;Lepidoptera;Chazara briseis;Chazara briseis;0.001;Chazara briseis;0.999984130678865;  
MT260545;Lepidoptera;Melitaea didyma;Melitaea didyma;1;Melitaea didyma;0.996218400743817;  
MT260549;Lepidoptera;Thymelicus lineola;Thymelicus lineola;1;Thymelicus lineola;0.999971535093703;  
MT260551;Lepidoptera;Satyrium ilicis;Satyrium ilicis;1;Satyrium ilicis;0.999999987901305;  
MT260563;Lepidoptera;Pyrgus armoricanus;Pyrgus armoricanus;1;Pyrgus armoricanus;0.997478680096412;  
MT260564;Lepidoptera;Chazara briseis;Chazara briseis;0.002;Chazara briseis;0.999942072582126;  
MT260571;Lepidoptera;Cercyonis lupina;Hyponephele lupina;1;Hyponephele lupina;0.99999970215072;  
MT260577;Lepidoptera;Anthocharis cardamines;Anthocharis cardamines;1;Anthocharis cardamines;0.999999940675226;  
MT260578;Lepidoptera;Aricia eumedon;Eumedonia eumedon;0.001;Eumedonia eumedon;0.998426969289132;  
MT260582;Lepidoptera;Thymelicus lineola;Thymelicus lineola;1;Thymelicus lineola;0.999971535093703;  
MT260680;Lepidoptera;Lasiommata maera;Lasiommata maera;1;Lasiommata maera;0.999999181072746;  
MT260682;Lepidoptera;Lasiommata megera;Lasiommata megera;0.006;Lasiommata megera;0.992588117195958;  
MT260683;Lepidoptera;Lasiommata maera;Lasiommata maera;1;Lasiommata maera;0.999997015581803;  
MT260684;Lepidoptera;Lasiommata megera;Lasiommata megera;0.006;Lasiommata megera;0.992588117195958;  
MT260685;Lepidoptera;Lasiommata megera;Lasiommata megera;0.006;Lasiommata megera;0.992588117195958;  
MT260687;Lepidoptera;Lasiommata megera;Lasiommata megera;0.006;Lasiommata megera;0.992588117195958;  
MT260688;Lepidoptera;Lasiommata megera;Lasiommata megera;0.006;Lasiommata megera;0.992588117195958;  
MT260689;Lepidoptera;Lasiommata maera;Lasiommata maera;1;Lasiommata maera;0.999997674120242;  
MT260690;Lepidoptera;Lasiommata megera;Lasiommata megera;0.006;Lasiommata megera;0.992588117195958;  
MT260696;Lepidoptera;Lasiommata maera;Lasiommata maera;1;Lasiommata maera;0.999999181072746;

MT260699;Lepidoptera;Lasiommata megera;Lasiommata megera;0.006;Lasiommata megera;0.992588117195958;  
MT260701;Lepidoptera;Lasiommata maera;Lasiommata maera;1;Lasiommata maera;0.999987542384394;  
MT260702;Lepidoptera;Lasiommata maera;Lasiommata maera;1;Lasiommata maera;0.99998795455512;  
MT260704;Lepidoptera;Lasiommata megera;Lasiommata megera;0.006;Lasiommata megera;0.992588117195958;  
MT260706;Lepidoptera;Lasiommata megera;Lasiommata megera;0.006;Lasiommata megera;0.992588117195958;  
MT260707;Lepidoptera;Lasiommata maera;Lasiommata maera;1;Lasiommata maera;0.99999510792253;  
MT260709;Lepidoptera;Lasiommata petropolitana;Lasiommata petropolitana;1;Lasiommata petropolitana;0.99999894617524;  
MT260710;Lepidoptera;Lasiommata megera;Lasiommata megera;0.006;Lasiommata megera;0.992588117195958;  
MT260712;Lepidoptera;Lasiommata petropolitana;Lasiommata petropolitana;1;Lasiommata petropolitana;0.99999894617524;  
MT260713;Lepidoptera;Lasiommata maera;Lasiommata maera;1;Lasiommata maera;0.999999359006984;  
MT260714;Lepidoptera;Lasiommata petropolitana;Lasiommata petropolitana;1;Lasiommata petropolitana;0.99999894617524;  
MT260715;Lepidoptera;Lasiommata megera;Lasiommata megera;0.003;Lasiommata megera;0.994026268320976;  
MT260716;Lepidoptera;Lasiommata megera;Lasiommata megera;1;Lasiommata megera;0.999928528239676;  
MT260717;Lepidoptera;Lasiommata megera;Lasiommata megera;1;Lasiommata megera;0.999928528239676;  
MT260718;Lepidoptera;Lasiommata maera;Lasiommata maera;1;Lasiommata maera;0.999991522853214;  
MT260719;Lepidoptera;Lasiommata maera;Lasiommata maera;1;Lasiommata maera;0.999998450411432;  
MT260720;Lepidoptera;Lasiommata megera;Lasiommata megera;0.006;Lasiommata megera;0.992588117195958;  
MT260721;Lepidoptera;Lasiommata maera;Lasiommata maera;1;Lasiommata maera;0.999999483871809;  
MT260722;Lepidoptera;Lasiommata megera;Lasiommata megera;0.006;Lasiommata megera;0.992588117195958;  
MT260723;Lepidoptera;Lasiommata maera;Lasiommata maera;1;Lasiommata maera;0.99999510792253;  
MT260726;Lepidoptera;Lasiommata maera;Lasiommata maera;1;Lasiommata maera;0.999987542384394;  
MT260728;Lepidoptera;Lasiommata megera;Lasiommata megera;0.006;Lasiommata megera;0.992588117195958;  
MT260729;Lepidoptera;Lasiommata megera;Lasiommata megera;0.006;Lasiommata megera;0.992588117195958;  
MT260730;Lepidoptera;Lasiommata petropolitana;Lasiommata petropolitana;1;Lasiommata petropolitana;0.99999894617524;  
MT260731;Lepidoptera;Lasiommata megera;Lasiommata megera;0.006;Lasiommata megera;0.992588117195958;  
MT260732;Lepidoptera;Lasiommata megera;Lasiommata megera;0.006;Lasiommata megera;0.992588117195958;  
MT260733;Lepidoptera;Lasiommata maera;Lasiommata maera;1;Lasiommata maera;0.999999324290287;  
MT260734;Lepidoptera;Lasiommata maera;Lasiommata maera;1;Lasiommata maera;0.999998450411432;  
MT260735;Lepidoptera;Lasiommata maera;Lasiommata maera;1;Lasiommata maera;0.99999942908402;  
MT260742;Lepidoptera;Lasiommata petropolitana;Lasiommata petropolitana;1;Lasiommata petropolitana;0.99999894617524;  
MT260743;Lepidoptera;Lasiommata maera;Lasiommata maera;1;Lasiommata maera;0.999999589574741;  
MT260744;Lepidoptera;Lasiommata maera;Lasiommata maera;1;Lasiommata maera;0.99999942908402;  
MT260746;Lepidoptera;Lasiommata maera;Lasiommata maera;1;Lasiommata maera;0.99999953156492;  
MT260748;Lepidoptera;Lasiommata petropolitana;Lasiommata petropolitana;1;Lasiommata petropolitana;0.99999894617524;  
MT260752;Lepidoptera;Lasiommata petropolitana;Lasiommata petropolitana;1;Lasiommata petropolitana;0.99999894617524;  
MT260755;Lepidoptera;Lasiommata maera;Lasiommata maera;1;Lasiommata maera;0.999997945450226;  
MT260760;Lepidoptera;Lasiommata maera;Lasiommata maera;1;Lasiommata maera;0.999962725146629;  
MT260768;Lepidoptera;Lasiommata maera;Lasiommata maera;1;Lasiommata maera;0.99999510792253;  
MT260770;Lepidoptera;Lasiommata maera;Lasiommata maera;1;Lasiommata maera;0.999996052464927;  
MT260774;Lepidoptera;Lasiommata maera;Lasiommata maera;1;Lasiommata maera;0.999999564642432;  
MT260775;Lepidoptera;Lasiommata maera;Lasiommata maera;1;Lasiommata maera;0.999969785724269;  
MT260777;Lepidoptera;Lasiommata maera;Lasiommata maera;1;Lasiommata maera;0.999998145722074;  
MT260783;Lepidoptera;Lasiommata maera;Lasiommata maera;1;Lasiommata maera;0.999977177591724;  
MT260795;Lepidoptera;Lasiommata maera;Lasiommata maera;1;Lasiommata maera;0.999995085037084;  
MT260796;Lepidoptera;Lasiommata maera;Lasiommata maera;1;Lasiommata maera;0.999997937566031;  
MT260800;Lepidoptera;Lasiommata petropolitana;Lasiommata petropolitana;1;Lasiommata petropolitana;0.999993702781655;  
MT407191;Lepidoptera;Polyommatus dorylas;Polyommatus dorylas;0.025;Polyommatus dorylas;0.973229109265438;  
MT407192;Lepidoptera;Pyrgus alveus;NA;0.003;NA;0.99999999997732;  
MT407194;Lepidoptera;Pyrgus alveus;NA;0.003;NA;0.99999999997732;  
MT407195;Lepidoptera;Polyommatus dorylas;Polyommatus dorylas;0.025;Polyommatus dorylas;0.973229109265438;  
MT407198;Lepidoptera;Pyrgus alveus;NA;0.003;NA;0.999999999991958;  
MT542035;Lepidoptera;Hipparchia hermione;Hipparchia hermione;0.994;Hipparchia hermione;0.999163981646306;  
MT754761;Lepidoptera;Anthocharis euphenoides;NA;NA;Anthocharis euphenoides;0.918091940135132;  
MT762427;Lepidoptera;Erebia euryale;NA;NA;NA;0.980177726841082;  
MT762428;Lepidoptera;Erebia euryale;NA;NA;NA;0.979998616068728;  
MT762429;Lepidoptera;Erebia euryale;NA;NA;NA;0.981229455143466;

MT762430;Lepidoptera;Erebia euryale;NA;NA;NA;0.981494072829649;  
MT762431;Lepidoptera;Erebia euryale;NA;NA;NA;0.980077756882373;  
MT762432;Lepidoptera;Erebia euryale;NA;NA;NA;0.980077756882373;  
MT762433;Lepidoptera;Erebia euryale;NA;NA;NA;0.981508603161791;  
MT762434;Lepidoptera;Erebia euryale;NA;NA;NA;0.979885676866601;  
MT762435;Lepidoptera;Erebia euryale;NA;NA;NA;0.980591463695186;  
MT762436;Lepidoptera;Erebia euryale;NA;NA;NA;0.981794449211529;  
MT762437;Lepidoptera;Erebia euryale;NA;NA;NA;0.979175545353201;  
MT762438;Lepidoptera;Erebia euryale;NA;NA;NA;0.980077756882373;  
MT762439;Lepidoptera;Erebia euryale;NA;NA;Erebia euryale;0.917188916446992;  
MT762440;Lepidoptera;Erebia euryale;NA;NA;Erebia euryale;0.918708108660549;  
MT762441;Lepidoptera;Erebia euryale;NA;NA;NA;0.979885676866601;  
MT762442;Lepidoptera;Erebia euryale;NA;NA;NA;0.981935109709425;  
MT762443;Lepidoptera;Erebia euryale;NA;NA;Erebia euryale;0.917188916446992;  
MT762444;Lepidoptera;Erebia euryale;NA;NA;NA;0.97677524351009;  
MT762445;Lepidoptera;Erebia euryale;NA;NA;NA;0.980183123854502;  
MT762446;Lepidoptera;Erebia euryale;NA;NA;NA;0.975021043195457;  
MT762447;Lepidoptera;Erebia euryale;NA;NA;NA;0.980077756882373;  
MT762448;Lepidoptera;Erebia euryale;NA;NA;NA;0.980720516458537;  
MT762449;Lepidoptera;Erebia euryale;NA;NA;NA;0.981508603161791;  
MT762450;Lepidoptera;Erebia euryale;NA;NA;NA;0.98144379019338;  
MT762451;Lepidoptera;Erebia euryale;NA;NA;NA;0.981494072829649;  
MT762452;Lepidoptera;Erebia euryale;NA;NA;NA;0.981229455143466;  
MT762453;Lepidoptera;Erebia euryale;NA;NA;NA;0.980652778709602;  
MT762454;Lepidoptera;Erebia euryale;NA;NA;NA;0.981229455143466;  
MT762455;Lepidoptera;Erebia euryale;NA;NA;NA;0.97559294881142;  
MT762456;Lepidoptera;Erebia euryale;NA;NA;NA;0.981242536199523;  
MT762457;Lepidoptera;Erebia euryale;NA;NA;NA;0.978829315023305;  
MT762458;Lepidoptera;Erebia euryale;NA;NA;NA;0.980077756882373;  
MT762459;Lepidoptera;Erebia euryale;NA;NA;NA;0.981197016169021;  
MT762460;Lepidoptera;Erebia euryale;NA;NA;NA;0.978507088226212;  
MT762461;Lepidoptera;Erebia euryale;NA;NA;NA;0.98144379019338;  
MT762462;Lepidoptera;Erebia euryale;NA;NA;NA;0.980077756882373;  
MT762463;Lepidoptera;Erebia euryale;NA;NA;Erebia euryale;0.946110059318061;  
MT762465;Lepidoptera;Erebia euryale;NA;NA;NA;0.981794449211529;  
MT762466;Lepidoptera;Erebia euryale;NA;NA;NA;0.981508603161791;  
MT762467;Lepidoptera;Erebia euryale;NA;NA;NA;0.983199534376736;  
MT762468;Lepidoptera;Erebia euryale;NA;NA;NA;0.98087605677506;  
MT762469;Lepidoptera;Erebia euryale;NA;NA;NA;0.981314511549447;  
MT762470;Lepidoptera;Erebia euryale;NA;NA;NA;0.978829315023305;  
MT762471;Lepidoptera;Erebia euryale;NA;NA;NA;0.981794449211529;  
MT762587;Lepidoptera;Erebia euryale;NA;NA;NA;0.983199534376736;  
MT762589;Lepidoptera;Erebia euryale;NA;NA;NA;0.981508603161791;  
MT762590;Lepidoptera;Erebia euryale;NA;NA;NA;0.98087605677506;  
MT762591;Lepidoptera;Erebia euryale;NA;NA;NA;0.981229455143466;  
MT762592;Lepidoptera;Erebia euryale;NA;NA;NA;0.981242536199523;  
MT762593;Lepidoptera;Erebia euryale;NA;NA;NA;0.981508603161791;  
MT762594;Lepidoptera;Erebia euryale;NA;NA;NA;0.981229455143466;  
MT762595;Lepidoptera;Erebia euryale;NA;NA;NA;0.980077756882373;  
MT762596;Lepidoptera;Erebia euryale;NA;NA;NA;0.981494072829649;  
MT762597;Lepidoptera;Erebia euryale;NA;NA;NA;0.976359747831073;  
MT762598;Lepidoptera;Erebia euryale;NA;NA;NA;0.981794449211529;  
MT762599;Lepidoptera;Erebia euryale;NA;NA;Erebia euryale;0.917188916446992;  
MT762600;Lepidoptera;Erebia euryale;NA;NA;NA;0.980077756882373;  
MT762601;Lepidoptera;Erebia euryale;NA;NA;NA;0.981508603161791;  
MT762602;Lepidoptera;Erebia euryale;NA;NA;NA;0.981242536199523;  
MT763206;Lepidoptera;Cupido minimus;NA;0.009;Cupido minimus;0.999791453712643;  
MT763208;Lepidoptera;Cupido minimus;NA;0.001;Cupido minimus;0.999744526451824;  
MT763213;Lepidoptera;Cupido minimus;NA;0.009;Cupido minimus;0.999791453712643;  
MT763215;Lepidoptera;Cupido minimus;NA;0.001;Cupido minimus;0.999803920701362;  
MT763225;Lepidoptera;Cupido minimus;NA;0.009;Cupido minimus;0.999791453712643;  
MT763226;Lepidoptera;Cupido minimus;NA;0.005;Cupido minimus;0.999845177535126;  
MT763227;Lepidoptera;Cupido osiris;NA;0.001;Cupido minimus;0.999751488575214;  
MT763232;Lepidoptera;Cupido minimus;NA;0.001;Cupido minimus;0.999803920701362;  
MT820115;Lepidoptera;Scolitantides orion;Scolitantides orion;1;Scolitantides orion;0.999999985679921;  
MT820116;Lepidoptera;Scolitantides orion;Scolitantides orion;1;Scolitantides orion;0.999999991664055;  
MT883793;Lepidoptera;Aricia agestis;NA;NA;Aricia agestis;0.995795194058403;  
MT883794;Lepidoptera;Aricia agestis;NA;NA;Aricia agestis;0.995795194058403;  
MT883795;Lepidoptera;Aricia agestis;NA;NA;Aricia agestis;0.995795194058403;  
MT883796;Lepidoptera;Aricia agestis;NA;NA;Aricia agestis;0.995795194058403;  
MT883797;Lepidoptera;Aricia agestis;NA;NA;Aricia agestis;0.995795194058403;  
MT883798;Lepidoptera;Aricia agestis;NA;0.051;Aricia agestis;0.998202101507509;  
MT883799;Lepidoptera;Aricia agestis;NA;0.071;Aricia agestis;0.998899398847738;  
MT883800;Lepidoptera;Aricia agestis;NA;NA;Aricia agestis;0.995795194058403;  
MT883801;Lepidoptera;Aricia agestis;NA;0.09;Aricia agestis;0.997870238744858;  
MT883802;Lepidoptera;Aricia agestis;NA;0.09;Aricia agestis;0.997870238744858;

MT883803;Lepidoptera;Aricia agestis;NA;0.82;Aricia agestis;0.995758023535589;  
MT883804;Lepidoptera;Aricia agestis;NA;0.095;Aricia agestis;0.999048314214513;  
MT883805;Lepidoptera;Aricia agestis;NA;0.002;Aricia agestis;0.99615265287688;  
MT883806;Lepidoptera;Aricia agestis;NA;0.248;Aricia agestis;0.990644677254859;  
MT883807;Lepidoptera;Aricia agestis;NA;0.063;Aricia agestis;0.999338867187177;  
MT883824;Lepidoptera;Aricia agestis;NA;0.085;Aricia agestis;0.998443236667052;  
MT883829;Lepidoptera;Aricia agestis;NA;0.09;Aricia agestis;0.998439847764027;  
MT883830;Lepidoptera;Aricia agestis;NA;0.838;Aricia agestis;0.994964776252503;  
MT883831;Lepidoptera;Aricia agestis;NA;0.004;Aricia agestis;0.995469468230926;  
MT883832;Lepidoptera;Aricia agestis;NA;NA;Aricia agestis;0.995795194058403;  
MT883833;Lepidoptera;Aricia agestis;NA;NA;Aricia agestis;0.995003792644976;  
MT883834;Lepidoptera;Aricia agestis;NA;NA;Aricia agestis;0.995003792644976;  
MT883835;Lepidoptera;Aricia agestis;NA;NA;Aricia agestis;0.995003792644976;  
MT883836;Lepidoptera;Aricia agestis;NA;0.064;Aricia agestis;0.982191640839714;  
MT883837;Lepidoptera;Aricia agestis;NA;NA;Aricia agestis;0.994159926845497;  
MT883838;Lepidoptera;Aricia agestis;NA;NA;Aricia agestis;0.995003792644976;  
MT883839;Lepidoptera;Aricia agestis;NA;0.029;Aricia agestis;0.996043302428696;  
MT883840;Lepidoptera;Aricia agestis;NA;0.063;Aricia agestis;0.999338867187177;  
MT883841;Lepidoptera;Aricia agestis;NA;0.211;Aricia agestis;0.989741607714042;  
MT883842;Lepidoptera;Aricia agestis;NA;0.09;Aricia agestis;0.998439847764027;  
MT883843;Lepidoptera;Aricia agestis;NA;NA;Aricia agestis;0.999322692569665;  
MT883844;Lepidoptera;Aricia agestis;NA;0.085;Aricia agestis;0.998443236667052;  
MT883845;Lepidoptera;Aricia agestis;NA;0.001;Aricia agestis;0.992019907652986;  
MT883846;Lepidoptera;Aricia agestis;NA;0.001;Aricia agestis;0.992019907652986;  
MT883847;Lepidoptera;Aricia agestis;NA;NA;Aricia agestis;0.997776689728982;  
MT883848;Lepidoptera;Aricia agestis;NA;0.216;Aricia agestis;0.995067999923329;  
MT883849;Lepidoptera;Aricia agestis;NA;0.086;Aricia agestis;0.998657695014588;  
MT883850;Lepidoptera;Aricia agestis;NA;0.086;Aricia agestis;0.998657695014588;  
MT883851;Lepidoptera;Aricia agestis;NA;0.086;Aricia agestis;0.998657695014588;  
MT883852;Lepidoptera;Aricia agestis;NA;NA;Aricia agestis;0.99411084790873;  
MT883853;Lepidoptera;Aricia agestis;NA;NA;Aricia agestis;0.995795194058403;  
MT883854;Lepidoptera;Aricia agestis;NA;NA;Aricia agestis;0.995795194058403;  
MT883855;Lepidoptera;Aricia agestis;NA;0.232;Aricia agestis;0.993220086532625;  
MT883856;Lepidoptera;Aricia agestis;NA;0.09;Aricia agestis;0.997870238744858;  
MT883857;Lepidoptera;Aricia agestis;NA;0.075;Aricia agestis;0.997361601645521;  
MT883858;Lepidoptera;Aricia agestis;NA;NA;Aricia agestis;0.995795194058403;  
MT883859;Lepidoptera;Aricia agestis;NA;NA;Aricia agestis;0.995795194058403;  
MT883860;Lepidoptera;Aricia agestis;NA;NA;Aricia agestis;0.995795194058403;  
MT883861;Lepidoptera;Aricia agestis;NA;0.199;Aricia agestis;0.995084156891833;  
MT883862;Lepidoptera;Aricia agestis;NA;NA;Aricia agestis;0.995795194058403;  
MT883863;Lepidoptera;Aricia agestis;NA;NA;Aricia agestis;0.995795194058403;  
MT883864;Lepidoptera;Aricia agestis;NA;NA;Aricia agestis;0.994798565680823;  
MT883865;Lepidoptera;Aricia agestis;NA;0.216;Aricia agestis;0.995067999923329;  
MT883866;Lepidoptera;Aricia agestis;NA;NA;Aricia agestis;0.995795194058403;  
MT883867;Lepidoptera;Aricia agestis;NA;NA;Aricia agestis;0.995700889362845;  
MT883868;Lepidoptera;Aricia agestis;NA;0.333;Aricia agestis;0.98906064156363;  
MT883869;Lepidoptera;Aricia agestis;NA;0.076;Aricia agestis;0.997820574035871;  
MT883870;Lepidoptera;Aricia agestis;NA;NA;Aricia agestis;0.995795194058403;  
MT883872;Lepidoptera;Aricia agestis;NA;NA;Aricia agestis;0.995795194058403;  
MT883876;Lepidoptera;Aricia agestis;NA;NA;Aricia agestis;0.995795194058403;  
MT883877;Lepidoptera;Aricia agestis;NA;NA;Aricia agestis;0.995795194058403;  
MT883881;Lepidoptera;Aricia agestis;NA;NA;Aricia agestis;0.995795194058403;  
MT883882;Lepidoptera;Aricia agestis;NA;NA;Aricia agestis;0.995795194058403;  
MT883883;Lepidoptera;Aricia agestis;NA;NA;Aricia agestis;0.994141106907679;  
MT883887;Lepidoptera;Aricia agestis;NA;0.117;Aricia agestis;0.996361022415287;  
MT883890;Lepidoptera;Aricia agestis;NA;0.01;Aricia agestis;0.995073099917515;  
MT883891;Lepidoptera;Aricia agestis;NA;NA;Aricia agestis;0.995795194058403;  
MT883892;Lepidoptera;Aricia agestis;NA;NA;Aricia agestis;0.995795194058403;  
MT883893;Lepidoptera;Aricia agestis;NA;NA;Aricia agestis;0.995795194058403;  
MT883897;Lepidoptera;Aricia artaxerxes;Plebejus argus;0.001;Aricia artaxerxes;0.999718461525682;  
MT883898;Lepidoptera;Aricia artaxerxes;Plebejus argus;1;Aricia artaxerxes;0.999614208860043;  
MT883899;Lepidoptera;Aricia artaxerxes;Plebejus argus;1;Aricia artaxerxes;0.999614208860043;  
MT883900;Lepidoptera;Aricia artaxerxes;Plebejus argus;1;Aricia artaxerxes;0.999614208860043;  
MT883901;Lepidoptera;Aricia artaxerxes;Plebejus argus;1;Aricia artaxerxes;0.999655434437236;  
MT883902;Lepidoptera;Aricia artaxerxes;Plebejus argus;1;Aricia artaxerxes;0.999647262882285;  
MT883903;Lepidoptera;Aricia artaxerxes;Plebejus argus;1;Aricia artaxerxes;0.999647262882285;  
MT883904;Lepidoptera;Aricia artaxerxes;NA;0.057;Aricia artaxerxes;0.998580396185112;  
MT883905;Lepidoptera;Aricia artaxerxes;Plebejus argus;1;Aricia artaxerxes;0.999647262882285;  
MT883906;Lepidoptera;Aricia artaxerxes;NA;0.405;Aricia artaxerxes;0.999321534627296;  
MT883907;Lepidoptera;Aricia artaxerxes;NA;0.057;Aricia artaxerxes;0.998580396185112;  
MT883908;Lepidoptera;Aricia artaxerxes;Plebejus argus;1;Aricia artaxerxes;0.999647262882285;  
MT883909;Lepidoptera;Aricia artaxerxes;Plebejus argus;1;Aricia artaxerxes;0.99965221345013;  
MT883910;Lepidoptera;Aricia artaxerxes;Plebejus argus;1;Aricia artaxerxes;0.999647262882285;  
MT883911;Lepidoptera;Aricia artaxerxes;Plebejus argus;1;Aricia artaxerxes;0.999647262882285;  
MT883912;Lepidoptera;Aricia artaxerxes;Plebejus argus;1;Aricia artaxerxes;0.999647262882285;  
MT883913;Lepidoptera;Aricia artaxerxes;Plebejus argus;1;Aricia artaxerxes;0.99964973329905;  
MT883914;Lepidoptera;Aricia artaxerxes;NA;0.001;Aricia artaxerxes;0.999398474801114;  
MT883915;Lepidoptera;Aricia artaxerxes;NA;0.001;Aricia artaxerxes;0.999398474801114;

[illegible]



|                               |                          |                                        |                              |
|-------------------------------|--------------------------|----------------------------------------|------------------------------|
| MT888530; Lepidoptera; Erebia | epiphron; Erebia         | epiphron; 0.999; Erebia                | epiphron; 0.99759039933702;  |
| MT888531; Lepidoptera; Erebia | epiphron; Erebia         | epiphron; 0.999; Erebia                | epiphron; 0.99759039933702;  |
| MT888532; Lepidoptera; Erebia | epiphron; Erebia         | epiphron; 0.999; Erebia                | epiphron; 0.99759039933702;  |
| MT888533; Lepidoptera; Erebia | epiphron; Erebia         | epiphron; 0.999; Erebia                | epiphron; 0.99759039933702;  |
| MT888534; Lepidoptera; Erebia | epiphron; Erebia         | epiphron; 0.999; Erebia                | epiphron; 0.99759039933702;  |
| MT888535; Lepidoptera; Erebia | epiphron; Erebia         | epiphron; 0.999; Erebia                | epiphron; 0.99759039933702;  |
| MT888536; Lepidoptera; Erebia | epiphron; Erebia         | epiphron; NA; Erebia                   | epiphron; 0.997674872625976; |
| MT888537; Lepidoptera; Erebia | epiphron; Erebia         | epiphron; NA; Erebia                   | epiphron; 0.997674872625976; |
| MT888538; Lepidoptera; Erebia | epiphron; Erebia         | epiphron; 0.999; Erebia                | epiphron; 0.99759039933702;  |
| MT888539; Lepidoptera; Erebia | epiphron; Erebia         | epiphron; 0.999; Erebia                | epiphron; 0.997912859906612; |
| MT888540; Lepidoptera; Erebia | epiphron; NA; NA; Erebia | epiphron; 0.988808043167437;           |                              |
| MT888541; Lepidoptera; Erebia | epiphron; NA; NA; Erebia | epiphron; epiphron; 0.979678638304217; |                              |
| MT888542; Lepidoptera; Erebia | epiphron; Erebia         | epiphron; NA; Erebia                   | epiphron; 0.982907493803221; |
| MT888543; Lepidoptera; Erebia | epiphron; Erebia         | epiphron; NA; Erebia                   | epiphron; 0.997674872625976; |
| MT888544; Lepidoptera; Erebia | epiphron; Erebia         | epiphron; NA; Erebia                   | epiphron; 0.990601695115395; |
| MT888545; Lepidoptera; Erebia | epiphron; Erebia         | epiphron; NA; Erebia                   | epiphron; 0.997674872625976; |
| MT888546; Lepidoptera; Erebia | epiphron; Erebia         | epiphron; NA; Erebia                   | epiphron; 0.990601695115395; |
| MT888547; Lepidoptera; Erebia | epiphron; Erebia         | epiphron; NA; Erebia                   | epiphron; 0.997674872625976; |
| MT888548; Lepidoptera; Erebia | epiphron; NA; NA; Erebia | epiphron; 0.82335301498274;            |                              |
| MT888549; Lepidoptera; Erebia | epiphron; NA; NA; Erebia | epiphron; 0.899790754784099;           |                              |
| MT888550; Lepidoptera; Erebia | epiphron; NA; NA; Erebia | epiphron; 0.922323764005511;           |                              |
| MT888551; Lepidoptera; Erebia | epiphron; NA; NA; Erebia | epiphron; 0.922323764005511;           |                              |
| MT888552; Lepidoptera; Erebia | epiphron; NA; NA; Erebia | epiphron; 0.922323764005511;           |                              |
| MT888553; Lepidoptera; Erebia | epiphron; Erebia         | epiphron; NA; Erebia                   | epiphron; 0.996646282325801; |
| MT888554; Lepidoptera; Erebia | epiphron; NA; NA; Erebia | epiphron; 0.922323764005511;           |                              |
| MT888555; Lepidoptera; Erebia | epiphron; NA; NA; Erebia | epiphron; 0.903141567361045;           |                              |
| MT888556; Lepidoptera; Erebia | epiphron; NA; NA; Erebia | epiphron; 0.903141567361045;           |                              |
| MT888557; Lepidoptera; Erebia | epiphron; NA; NA; Erebia | epiphron; 0.903141567361045;           |                              |
| MT888558; Lepidoptera; Erebia | epiphron; NA; NA; Erebia | epiphron; 0.903141567361045;           |                              |
| MT888559; Lepidoptera; Erebia | epiphron; Erebia         | epiphron; NA; Erebia                   | epiphron; 0.997674872625976; |
| MT888560; Lepidoptera; Erebia | epiphron; NA; NA; Erebia | epiphron; 0.875863812301053;           |                              |
| MT888561; Lepidoptera; Erebia | epiphron; Erebia         | epiphron; 1; Erebia                    | epiphron; 0.998429910204512; |
| MT888562; Lepidoptera; Erebia | epiphron; Erebia         | epiphron; 1; Erebia                    | epiphron; 0.998429910204512; |
| MT888563; Lepidoptera; Erebia | epiphron; Erebia         | epiphron; NA; Erebia                   | epiphron; 0.996935107305526; |
| MT888564; Lepidoptera; Erebia | epiphron; Erebia         | epiphron; 0.001; Erebia                | epiphron; 0.99859361271643;  |
| MT888565; Lepidoptera; Erebia | epiphron; NA; NA; Erebia | epiphron; 0.923842950984622;           |                              |
| MT888566; Lepidoptera; Erebia | epiphron; Erebia         | epiphron; 0.999; Erebia                | epiphron; 0.99759039933702;  |
| MT888567; Lepidoptera; Erebia | epiphron; Erebia         | epiphron; 1; Erebia                    | epiphron; 0.998543227968117; |
| MT888568; Lepidoptera; Erebia | epiphron; NA; NA; Erebia | epiphron; 0.988808043167437;           |                              |
| MT888569; Lepidoptera; Erebia | epiphron; NA; NA; Erebia | epiphron; 0.988808043167437;           |                              |
| MT888570; Lepidoptera; Erebia | epiphron; NA; NA; Erebia | epiphron; 0.988808043167437;           |                              |
| MT888571; Lepidoptera; Erebia | epiphron; NA; NA; Erebia | epiphron; 0.988808043167437;           |                              |
| MT888572; Lepidoptera; Erebia | epiphron; NA; NA; Erebia | epiphron; 0.988808043167437;           |                              |
| MT888573; Lepidoptera; Erebia | epiphron; Erebia         | epiphron; NA; Erebia                   | epiphron; 0.996294777952599; |
| MT888574; Lepidoptera; Erebia | epiphron; NA; NA; Erebia | epiphron; 0.988808043167437;           |                              |
| MT888575; Lepidoptera; Erebia | epiphron; NA; NA; Erebia | epiphron; 0.985298213496352;           |                              |
| MT888576; Lepidoptera; Erebia | epiphron; NA; NA; Erebia | epiphron; 0.988808043167437;           |                              |
| MT888577; Lepidoptera; Erebia | epiphron; NA; NA; Erebia | epiphron; 0.985975136115474;           |                              |
| MT888578; Lepidoptera; Erebia | epiphron; NA; NA; Erebia | epiphron; 0.988808043167437;           |                              |
| MT888579; Lepidoptera; Erebia | epiphron; Erebia         | epiphron; NA; Erebia                   | epiphron; 0.996072269478762; |
| MT888580; Lepidoptera; Erebia | epiphron; Erebia         | epiphron; NA; Erebia                   | epiphron; 0.988574669861925; |
| MT888581; Lepidoptera; Erebia | epiphron; Erebia         | epiphron; 0.003; Erebia                | epiphron; 0.992319157545094; |
| MT888582; Lepidoptera; Erebia | epiphron; Erebia         | epiphron; NA; Erebia                   | epiphron; 0.992077635916801; |
| MT888583; Lepidoptera; Erebia | epiphron; Erebia         | epiphron; 0.003; Erebia                | epiphron; 0.992319157545094; |
| MT888584; Lepidoptera; Erebia | epiphron; Erebia         | epiphron; NA; Erebia                   | epiphron; 0.990054909038254; |
| MT888585; Lepidoptera; Erebia | epiphron; Ere            |                                        |                              |

MT888608;Lepidoptera;Erebia epiphron;Erebia epiphron;1;Erebia epiphron;0.998543227968117;  
 MT888609;Lepidoptera;Erebia epiphron;NA;NA;Erebia epiphron;0.988808043167437;  
 MT888610;Lepidoptera;Erebia epiphron;Erebia epiphron;0.003;Erebia epiphron;0.994843571875843;  
 MT888611;Lepidoptera;Erebia epiphron;Erebia epiphron;1;Erebia epiphron;0.997474446283505;  
 MT888612;Lepidoptera;Erebia epiphron;NA;NA;Erebia epiphron;0.988808043167437;  
 MT888613;Lepidoptera;Erebia epiphron;NA;NA;Erebia epiphron;0.988808043167437;  
 MT888614;Lepidoptera;Erebia epiphron;NA;NA;Erebia epiphron;0.983914702217577;  
 MT888615;Lepidoptera;Erebia epiphron;NA;NA;Erebia epiphron;0.988808043167437;  
 MT888616;Lepidoptera;Erebia epiphron;NA;NA;Erebia epiphron;0.988808043167437;  
 MT888617;Lepidoptera;Erebia epiphron;NA;NA;Erebia epiphron;0.978209858904542;  
 MT888618;Lepidoptera;Erebia epiphron;NA;NA;Erebia epiphron;0.836928281784795;  
 MT888619;Lepidoptera;Erebia epiphron;Erebia epiphron;NA;Erebia epiphron;0.995197433509072;  
 MT888620;Lepidoptera;Erebia epiphron;Erebia epiphron;NA;Erebia epiphron;0.993671234659398;  
 MT888621;Lepidoptera;Erebia epiphron;Erebia epiphron;NA;Erebia epiphron;0.993671234659398;  
 MT888622;Lepidoptera;Erebia epiphron;Erebia epiphron;NA;Erebia epiphron;0.995197433509072;  
 MT888623;Lepidoptera;Erebia epiphron;Erebia epiphron;NA;Erebia epiphron;0.991919948695703;  
 MT888624;Lepidoptera;Erebia epiphron;Erebia epiphron;NA;Erebia epiphron;0.995197433509072;  
 MT888625;Lepidoptera;Erebia epiphron;Erebia epiphron;NA;Erebia epiphron;0.995197433509072;  
 MT888626;Lepidoptera;Erebia epiphron;Erebia epiphron;NA;Erebia epiphron;0.997674872625976;  
 MT888627;Lepidoptera;Erebia epiphron;Erebia epiphron;NA;Erebia epiphron;0.995197433509072;  
 MT888628;Lepidoptera;Erebia epiphron;Erebia epiphron;NA;Erebia epiphron;0.997674872625976;  
 MT888629;Lepidoptera;Erebia epiphron;NA;NA;Erebia epiphron;0.976879487910526;  
 MT888630;Lepidoptera;Erebia epiphron;Erebia epiphron;0.999;Erebia epiphron;0.99759039933702;  
 MT888631;Lepidoptera;Erebia epiphron;NA;NA;Erebia epiphron;0.988808043167437;  
 MT888632;Lepidoptera;Erebia epiphron;Erebia epiphron;NA;Erebia epiphron;0.997674872625976;  
 MT888633;Lepidoptera;Erebia epiphron;Erebia epiphron;0.999;Erebia epiphron;0.99759039933702;  
 MT888634;Lepidoptera;Erebia epiphron;NA;NA;Erebia epiphron;0.988808043167437;  
 MT888635;Lepidoptera;Erebia epiphron;NA;NA;Erebia epiphron;0.988808043167437;  
 MT888636;Lepidoptera;Erebia epiphron;Erebia epiphron;NA;Erebia epiphron;0.994476503692927;  
 MT888637;Lepidoptera;Erebia epiphron;NA;NA;Erebia epiphron;0.988808043167437;  
 MT916646;Lepidoptera;Boloria pales;Boloria pales;0.98;Boloria pales;0.996714917524805;  
 MT916647;Lepidoptera;Boloria pales;Boloria pales;0.981;Boloria pales;0.998425013043582;  
 MT916648;Lepidoptera;Boloria pales;Boloria pales;1;Boloria pales;0.99755627627013;  
 MT916649;Lepidoptera;Boloria pales;NA;0.001;Boloria pales;0.994818782865703;  
 MT916650;Lepidoptera;Boloria pales;Boloria pales;0.002;Boloria pales;0.996792240901136;  
 MT916651;Lepidoptera;Boloria pales;NA;0.025;Boloria pales;0.97789517650652;  
 MT916652;Lepidoptera;Boloria pales;Boloria pales;0.999;Boloria pales;0.999205653316991;  
 MT916653;Lepidoptera;Boloria pales;Boloria pales;0.005;Boloria pales;0.996814816604146;  
 MT916654;Lepidoptera;Boloria pales;Boloria pales;0.999;Boloria pales;0.998280319845678;  
 MT916658;Lepidoptera;Boloria pales;Boloria pales;0.989;Boloria pales;0.998385555851084;  
 MT916659;Lepidoptera;Boloria pales;NA;0.937;Boloria pales;0.998733056498353;  
 MT916660;Lepidoptera;Boloria pales;Boloria pales;0.005;Boloria pales;0.998446456271963;  
 MT916662;Lepidoptera;Boloria graeca;Boloria graeca;1;Boloria graeca;0.99999760399277;  
 MW018369;Lepidoptera;Carterocephalus palaemon;NA;0.001;NA;0.831323983685282;  
 MW018370;Lepidoptera;Carterocephalus palaemon;NA;0.023;NA;0.760197172423969;  
 MW018371;Lepidoptera;Carterocephalus palaemon;NA;0.051;NA;0.812555199457115;  
 MW018372;Lepidoptera;Carterocephalus palaemon;NA;0.04;NA;0.804278749360217;  
 MW018373;Lepidoptera;Carterocephalus palaemon;NA;0.025;NA;0.81165813140617;  
 MW018374;Lepidoptera;Carterocephalus palaemon;Carterocephalus  
 palaemon;0.004;NA;0.754766205123178;  
 MW018375;Lepidoptera;Carterocephalus palaemon;Carterocephalus  
 palaemon;0.012;NA;0.807494050702434;  
 MW018376;Lepidoptera;Carterocephalus palaemon;NA;0.051;NA;0.812555199457115;  
 MW018377;Lepidoptera;Carterocephalus palaemon;NA;0.051;NA;0.812555199457115;  
 MW018378;Lepidoptera;Carterocephalus palaemon;NA;0.004;NA;0.808382589796681;  
 MW018379;Lepidoptera;Carterocephalus palaemon;Carterocephalus palaemon;0.012;NA;0.8063190200437;  
 MW018380;Lepidoptera;Carterocephalus palaemon;Carterocephalus  
 palaemon;0.007;NA;0.800914463931916;  
 MW018381;Lepidoptera;Carterocephalus palaemon;Carterocephalus  
 palaemon;0.023;NA;0.801144927376144;  
 MW018382;Lepidoptera;Carterocephalus palaemon;NA;0.071;NA;0.823586759084245;  
 MW018383;Lepidoptera;Carterocephalus palaemon;Carterocephalus  
 palaemon;0.022;NA;0.749111025846228;  
 MW018384;Lepidoptera;Carterocephalus palaemon;NA;0.071;NA;0.823586759084245;  
 MW018385;Lepidoptera;Carterocephalus palaemon;Carterocephalus  
 palaemon;0.031;NA;0.821143955899775;  
 MW018386;Lepidoptera;Carterocephalus palaemon;Carterocephalus  
 palaemon;0.024;NA;0.822000047571336;  
 MW018387;Lepidoptera;Carterocephalus palaemon;Carterocephalus  
 palaemon;0.031;NA;0.821800732608293;  
 MW018388;Lepidoptera;Carterocephalus palaemon;Carterocephalus  
 palaemon;0.024;NA;0.822000047571336;  
 MW018389;Lepidoptera;Carterocephalus palaemon;Carterocephalus  
 palaemon;0.024;NA;0.822000047571336;  
 MW018390;Lepidoptera;Carterocephalus palaemon;NA;0.004;NA;0.835502873838912;  
 MW018391;Lepidoptera;Carterocephalus palaemon;NA;0.001;NA;0.834485175736893;  
 MW018392;Lepidoptera;Carterocephalus palaemon;NA;NA;NA;0.837586214771866;  
 MW018393;Lepidoptera;Carterocephalus palaemon;NA;0.338;NA;0.839863590220918;

MW018394;Lepidoptera;Carterocephalus palaemon;NA;0.009;NA;0.83681865078674;  
MW018395;Lepidoptera;Carterocephalus palaemon;Carterocephalus  
palaemon;0.027;NA;0.808758164245066;  
MW018396;Lepidoptera;Carterocephalus palaemon;NA;0.056;NA;0.783777757496647;  
MW018397;Lepidoptera;Carterocephalus palaemon;NA;0.051;NA;0.812555199457115;  
MW018398;Lepidoptera;Carterocephalus palaemon;NA;0.051;NA;0.812555199457115;  
MW018399;Lepidoptera;Carterocephalus palaemon;NA;0.059;NA;0.8117206527892;  
MW020751;Lepidoptera;Carterocephalus palaemon;NA;0.044;Carterocephalus  
palaemon;0.718510714269821;  
MW020752;Lepidoptera;Carterocephalus palaemon;NA;0.044;Carterocephalus  
palaemon;0.718510714269821;  
MW020753;Lepidoptera;Carterocephalus palaemon;NA;0.044;Carterocephalus  
palaemon;0.718510714269821;  
MW020754;Lepidoptera;Carterocephalus palaemon;NA;0.044;Carterocephalus  
palaemon;0.718510714269821;  
MW020757;Lepidoptera;Agriades optilete;Agriades optilete;0.001;Agriades  
optilete;0.999952671845106;  
MW020759;Lepidoptera;Carterocephalus palaemon;NA;0.059;NA;0.999999994198584;  
MW020761;Lepidoptera;Agriades optilete;Agriades optilete;1;Agriades optilete;0.99999665516078;  
MW020762;Lepidoptera;Agriades optilete;Agriades optilete;1;Agriades optilete;0.999992055773938;  
MW020763;Lepidoptera;Agriades optilete;Agriades optilete;1;Agriades optilete;0.999997730865788;  
MW020773;Lepidoptera;Agriades optilete;Agriades optilete;1;Agriades optilete;0.99999976235131;  
MW020774;Lepidoptera;Agriades optilete;Agriades optilete;1;Agriades optilete;0.99999978758865;  
MW020776;Lepidoptera;Agriades optilete;Agriades optilete;1;Agriades optilete;0.99999982698029;  
MW020777;Lepidoptera;Agriades optilete;Agriades optilete;1;Agriades optilete;0.99999992211684;  
MW020778;Lepidoptera;Agriades optilete;Agriades optilete;1;Agriades optilete;0.99999963299559;  
MW020779;Lepidoptera;Agriades optilete;Agriades optilete;1;Agriades optilete;0.99999988718884;  
MW020780;Lepidoptera;Agriades optilete;Agriades optilete;1;Agriades optilete;0.999999701913298;  
MW020781;Lepidoptera;Agriades optilete;Agriades optilete;1;Agriades optilete;0.999999703638694;  
MW020782;Lepidoptera;Agriades optilete;Agriades optilete;1;Agriades optilete;0.999999922414165;  
MW020783;Lepidoptera;Agriades optilete;Agriades optilete;1;Agriades optilete;0.99999956201095;  
MW020784;Lepidoptera;Agriades optilete;Agriades optilete;1;Agriades optilete;0.99999981863965;  
MW020785;Lepidoptera;Agriades optilete;Agriades optilete;1;Agriades optilete;0.99999981863965;  
MW020786;Lepidoptera;Agriades optilete;Agriades optilete;1;Agriades optilete;0.99999981863965;  
MW020787;Lepidoptera;Agriades optilete;Agriades optilete;1;Agriades optilete;0.9999998509324;  
MW020788;Lepidoptera;Agriades optilete;Agriades optilete;1;Agriades optilete;0.9999998509324;  
MW020789;Lepidoptera;Agriades optilete;Agriades optilete;1;Agriades optilete;0.99999944197414;  
MW020790;Lepidoptera;Agriades optilete;Agriades optilete;1;Agriades optilete;0.999999905074167;  
MW020791;Lepidoptera;Agriades optilete;Agriades optilete;1;Agriades optilete;0.9999999183251;  
MW020792;Lepidoptera;Agriades optilete;Agriades optilete;1;Agriades optilete;0.9999999183251;  
MW020793;Lepidoptera;Agriades optilete;Agriades optilete;1;Agriades optilete;0.9999999183251;  
MW020794;Lepidoptera;Agriades optilete;Agriades optilete;1;Agriades optilete;0.9999999183251;  
MW020795;Lepidoptera;Agriades optilete;Agriades optilete;1;Agriades optilete;0.9999999183251;  
MW020796;Lepidoptera;Agriades optilete;Agriades optilete;1;Agriades optilete;0.9999999183251;  
MW020797;Lepidoptera;Agriades optilete;Agriades optilete;1;Agriades optilete;0.9999999183251;  
MW020798;Lepidoptera;Agriades optilete;Agriades optilete;1;Agriades optilete;0.9999999183251;  
MW020799;Lepidoptera;Agriades optilete;Agriades optilete;1;Agriades optilete;0.9999999183251;  
MW020800;Lepidoptera;Agriades optilete;Agriades optilete;1;Agriades optilete;0.9999999183251;  
MW020801;Lepidoptera;Agriades optilete;Agriades optilete;1;Agriades optilete;0.9999999183251;  
MW020802;Lepidoptera;Agriades optilete;Agriades optilete;1;Agriades optilete;0.9999999183251;  
MW020803;Lepidoptera;Agriades optilete;Agriades optilete;1;Agriades optilete;0.99999990709597;  
MW020804;Lepidoptera;Carterocephalus palaemon;NA;0.003;Carterocephalus  
palaemon;0.804671191258276;  
MW020805;Lepidoptera;Carterocephalus palaemon;NA;0.052;Carterocephalus  
palaemon;0.872425292766646;  
MW020806;Lepidoptera;Carterocephalus palaemon;NA;0.001;Carterocephalus  
palaemon;0.88571582899001;  
MW074197;Lepidoptera;Agriades optilete;Agriades optilete;1;NA;0.741799864322424;  
MW074198;Lepidoptera;Agriades optilete;Agriades optilete;1;NA;0.725759010617684;  
MW074199;Lepidoptera;Agriades optilete;Agriades optilete;1;NA;0.737236210423575;  
MW074200;Lepidoptera;Agriades optilete;Agriades optilete;1;NA;0.768096839080684;  
MW074201;Lepidoptera;Agriades optilete;Agriades optilete;1;NA;0.776701491455792;  
MW074202;Lepidoptera;Agriades optilete;Agriades optilete;1;NA;0.78730494746731;  
MW074203;Lepidoptera;Agriades optilete;Agriades optilete;1;NA;0.78730494746731;  
MW074204;Lepidoptera;Agriades optilete;Agriades optilete;1;NA;0.774908975539208;  
MW074205;Lepidoptera;Agriades optilete;Agriades optilete;1;NA;0.72471512191744;  
MW074206;Lepidoptera;Agriades optilete;Agriades optilete;1;NA;0.78811413105295;  
MW074207;Lepidoptera;Agriades optilete;Agriades optilete;1;NA;0.969040623845612;  
MW074208;Lepidoptera;Agriades optilete;Agriades optilete;1;NA;0.763721676354015;  
MW074209;Lepidoptera;Agriades optilete;Agriades optilete;1;NA;0.846419389494508;  
MW074210;Lepidoptera;Agriades optilete;Agriades optilete;1;NA;0.756424135626854;  
MW074211;Lepidoptera;Agriades optilete;Agriades optilete;1;NA;0.96565836886323;  
MW074212;Lepidoptera;Agriades optilete;Agriades optilete;1;NA;0.854827304074265;  
MW074214;Lepidoptera;Agriades optilete;Agriades optilete;1;NA;0.754029020697366;  
MW074215;Lepidoptera;Agriades optilete;Agriades optilete;1;NA;0.718497331221683;  
MW074216;Lepidoptera;Agriades optilete;Agriades optilete;1;NA;0.72418114087878;  
MW074217;Lepidoptera;Agriades optilete;Agriades optilete;1;NA;0.710310588967142;  
MW074218;Lepidoptera;Agriades optilete;Agriades optilete;1;NA;0.722775350313532;

MW074219;Lepidoptera;Agriades optilete;Agriades optilete;1;NA;0.881327091508273;  
 MW076835;Lepidoptera;Agriades optilete;Agriades optilete;1;NA;0.955830138962869;  
 MW076836;Lepidoptera;Agriades optilete;Agriades optilete;1;NA;0.851286560996836;  
 MW076837;Lepidoptera;Agriades optilete;Agriades optilete;1;NA;0.85364284037449;  
 MW076838;Lepidoptera;Agriades optilete;Agriades optilete;1;NA;0.805187747640223;  
 MW076839;Lepidoptera;Agriades optilete;Agriades optilete;1;NA;0.851286560996836;  
 MW076840;Lepidoptera;Agriades optilete;Agriades optilete;1;NA;0.849676630755564;  
 MW076841;Lepidoptera;Agriades optilete;Agriades optilete;1;NA;0.856658131838675;  
 MW076842;Lepidoptera;Agriades optilete;Agriades optilete;1;NA;0.764396499370014;  
 MW076843;Lepidoptera;Agriades optilete;Agriades optilete;1;NA;0.850149688131446;  
 MW076844;Lepidoptera;Agriades optilete;Agriades optilete;1;NA;0.850149688131446;  
 MW076845;Lepidoptera;Agriades optilete;Agriades optilete;1;NA;0.850149688131446;  
 MW076846;Lepidoptera;Agriades optilete;Agriades optilete;1;NA;0.857181444940292;  
 MW076847;Lepidoptera;Agriades optilete;Agriades optilete;1;NA;0.798008330071348;  
 MW076848;Lepidoptera;Agriades optilete;Agriades optilete;1;NA;0.850149688131446;  
 MW076849;Lepidoptera;Agriades optilete;Agriades optilete;1;NA;0.820748433666706;  
 MW076850;Lepidoptera;Agriades optilete;Agriades optilete;1;NA;0.827410672835901;  
 MW076851;Lepidoptera;Agriades optilete;Agriades optilete;1;NA;0.764396499370014;  
 MW076852;Lepidoptera;Agriades optilete;Agriades optilete;1;NA;0.850149688131446;  
 MW076853;Lepidoptera;Agriades optilete;Agriades optilete;1;NA;0.850149688131446;  
 MW076854;Lepidoptera;Agriades optilete;Agriades optilete;1;NA;0.798398526396935;  
 MW076855;Lepidoptera;Agriades optilete;Agriades optilete;1;NA;0.834866098479717;  
 MW076856;Lepidoptera;Agriades optilete;Agriades optilete;1;NA;0.915129559295144;  
 MW076857;Lepidoptera;Agriades optilete;Agriades optilete;1;NA;0.840829824082625;  
 MW076858;Lepidoptera;Agriades optilete;Agriades optilete;1;NA;0.846203466672246;  
 MW076859;Lepidoptera;Agriades optilete;Agriades optilete;1;NA;0.844309395050879;  
 MW076860;Lepidoptera;Agriades optilete;Agriades optilete;1;NA;0.870057322814776;  
 MW076861;Lepidoptera;Agriades optilete;Agriades optilete;1;NA;0.842969821773041;  
 MW076862;Lepidoptera;Agriades optilete;Agriades optilete;1;NA;0.701398008979457;  
 MW076863;Lepidoptera;Agriades optilete;Agriades optilete;1;NA;0.845435939029228;  
 MW076864;Lepidoptera;Agriades optilete;Agriades optilete;1;NA;0.806242387159527;  
 MW076865;Lepidoptera;Agriades optilete;Agriades optilete;1;NA;0.809867434586453;  
 MW076866;Lepidoptera;Agriades optilete;Agriades optilete;1;NA;0.853959672154218;  
 MW076867;Lepidoptera;Agriades optilete;Agriades optilete;1;NA;0.721486821187749;  
 MW076868;Lepidoptera;Agriades optilete;Agriades optilete;1;NA;0.749370239961793;  
 MW076869;Lepidoptera;Agriades optilete;Agriades optilete;1;NA;0.75146998631583;  
 MW076870;Lepidoptera;Agriades optilete;Agriades optilete;1;NA;0.881253267071906;  
 MW076871;Lepidoptera;Agriades optilete;Agriades optilete;1;NA;0.801420601870599;  
 MW076872;Lepidoptera;Agriades optilete;Agriades optilete;1;NA;0.775746030286574;  
 MW076873;Lepidoptera;Agriades optilete;Agriades optilete;1;NA;0.823919553216607;  
 MW076874;Lepidoptera;Agriades optilete;Agriades optilete;1;NA;0.727747736695064;  
 MW076875;Lepidoptera;Agriades optilete;Agriades optilete;1;NA;0.816840733382655;  
 MW076876;Lepidoptera;Agriades optilete;Agriades optilete;1;NA;0.799387658958207;  
 MW076877;Lepidoptera;Agriades optilete;Agriades optilete;1;NA;0.805187747640223;  
 MW115572;Lepidoptera;Carterocephalus palaemon;Carterocephalus palaemon;0.016;Carterocephalus  
 palaemon;0.930544560040029;  
 MW115573;Lepidoptera;Carterocephalus palaemon;Carterocephalus palaemon;0.016;Carterocephalus  
 palaemon;0.930544560040029;  
 MW243570;Lepidoptera;Aporia crataegi;NA;NA;Aporia crataegi;0.999996781126733;  
 MW243571;Lepidoptera;Aporia crataegi;NA;NA;Aporia crataegi;0.999985980630602;  
 MW243572;Lepidoptera;Aporia crataegi;NA;NA;Aporia crataegi;0.999996513116824;  
 MW243573;Lepidoptera;Aporia crataegi;NA;NA;Aporia crataegi;0.999996781126733;  
 MW243574;Lepidoptera;Aporia crataegi;Aporia crataegi;0.001;Aporia crataegi;0.999997641254563;  
 MW243575;Lepidoptera;Aporia crataegi;Aporia crataegi;0.001;Aporia crataegi;0.999997641254563;  
 MW243576;Lepidoptera;Aporia crataegi;Aporia crataegi;0.001;Aporia crataegi;0.999997641254563;  
 MW243577;Lepidoptera;Aporia crataegi;Aporia crataegi;0.001;Aporia crataegi;0.999997641254563;  
 MW243578;Lepidoptera;Aporia crataegi;NA;NA;Aporia crataegi;0.999996899001592;  
 MW243579;Lepidoptera;Aporia crataegi;Aporia potanini;0.001;Aporia crataegi;0.999978049180661;  
 MW243580;Lepidoptera;Aporia crataegi;NA;NA;Aporia crataegi;0.999996781126733;  
 MW243581;Lepidoptera;Aporia crataegi;Aporia crataegi;0.001;Aporia crataegi;0.999997641254563;  
 MW243582;Lepidoptera;Aporia crataegi;NA;NA;Aporia crataegi;0.999996899001592;  
 MW243583;Lepidoptera;Aporia crataegi;NA;NA;Aporia crataegi;0.999996899001592;  
 MW303898;Lepidoptera;Coenonympha oedippus;Coenonympha oedippus;1;Coenonympha  
 oedippus;0.999999999994799;  
 MW303899;Lepidoptera;Coenonympha oedippus;Coenonympha oedippus;1;Coenonympha  
 oedippus;0.999999999985988;  
 MW303900;Lepidoptera;Coenonympha oedippus;Coenonympha oedippus;1;Coenonympha  
 oedippus;0.999999999989342;  
 MW303901;Lepidoptera;Coenonympha oedippus;Coenonympha oedippus;1;Coenonympha  
 oedippus;0.999999999983061;  
 MW303902;Lepidoptera;Coenonympha oedippus;Coenonympha oedippus;1;Coenonympha  
 oedippus;0.999999999986642;  
 MW303903;Lepidoptera;Coenonympha oedippus;Coenonympha oedippus;1;Coenonympha  
 oedippus;0.999999999991871;  
 MW378053;Lepidoptera;Satyrus ferula;Satyrus ferula;NA;Satyrus ferula;0.988352777249062;  
 MW378057;Lepidoptera;Satyrus ferula;NA;0.003;Satyrus ferula;0.984337909759304;  
 MW378058;Lepidoptera;Satyrus ferula;NA;0.001;Satyrus ferula;0.967551266003056;  
 MW378059;Lepidoptera;Iolana iolas;Iolana iolas;0.005;Iolana iolas;0.999998628870232;

MW378060;Lepidoptera;Satyrus ferula;Satyrus ferula;0.001;Satyrus ferula;0.992107254386621;  
MW378061;Lepidoptera;Satyrus ferula;Satyrus ferula;NA;Satyrus ferula;0.988352777249062;  
MW378062;Lepidoptera;Satyrus ferula;Satyrus ferula;0.001;Satyrus ferula;0.985590051567424;  
MW378066;Lepidoptera;Satyrus ferula;NA;0.001;Satyrus ferula;0.981576971897974;  
MW378069;Lepidoptera;Iolana iolas;Iolana iolas;0.005;Iolana iolas;0.999998628870232;  
MW378070;Lepidoptera;Satyrus ferula;Satyrus ferula;NA;Satyrus ferula;0.988352777249062;  
MW378072;Lepidoptera;Iolana iolas;Iolana iolas;0.005;Iolana iolas;0.999998628870232;  
MW378073;Lepidoptera;Satyrus ferula;NA;0.001;Satyrus ferula;0.993791605657274;  
MW378075;Lepidoptera;Satyrus ferula;Satyrus ferula;0.001;Satyrus ferula;0.992107254386621;  
MW378077;Lepidoptera;Satyrus ferula;NA;0.003;Satyrus ferula;0.98634948127527;  
MW378078;Lepidoptera;Satyrus ferula;Satyrus ferula;0.001;Satyrus ferula;0.992107254386621;  
MW378079;Lepidoptera;Satyrus ferula;NA;0.002;Satyrus ferula;0.981096107982503;  
MW378082;Lepidoptera;Satyrus ferula;NA;0.001;Satyrus ferula;0.967551266003056;  
MW378084;Lepidoptera;Satyrus ferula;NA;0.001;Satyrus ferula;0.995612186090573;  
MW378086;Lepidoptera;Iolana iolas;Iolana iolas;0.005;Iolana iolas;0.999998628870232;  
MW378087;Lepidoptera;Satyrus ferula;Satyrus ferula;0.001;Satyrus ferula;0.992107254386621;  
MW378088;Lepidoptera;Satyrus ferula;NA;0.001;Satyrus ferula;0.981576971897974;  
MW378090;Lepidoptera;Iolana iolas;Iolana iolas;0.002;Iolana iolas;0.999998159195929;  
MW378094;Lepidoptera;Satyrus ferula;NA;0.001;Satyrus ferula;0.98456793292707;  
MW378097;Lepidoptera;Satyrus ferula;NA;0.005;Satyrus ferula;0.984764481755209;  
MW378102;Lepidoptera;Iolana iolas;Iolana iolas;0.999;Iolana iolas;0.999995094388008;  
MW378103;Lepidoptera;Satyrus ferula;Satyrus ferula;0.001;Satyrus ferula;0.997365621936803;  
MW378104;Lepidoptera;Satyrus ferula;NA;0.001;Satyrus ferula;0.9759385768096;  
MW378106;Lepidoptera;Iolana iolas;Iolana iolas;0.005;Iolana iolas;0.999998390024234;  
MW378107;Lepidoptera;Iolana iolas;Iolana iolas;0.005;Iolana iolas;0.999998628870232;  
MW378108;Lepidoptera;Satyrus ferula;Satyrus ferula;1;Satyrus ferula;0.997048180294409;  
MW378110;Lepidoptera;Satyrus ferula;NA;0.001;Satyrus ferula;0.996082361232068;  
MW378111;Lepidoptera;Iolana iolas;Iolana iolas;0.003;Iolana iolas;0.999997882233995;  
MW378113;Lepidoptera;Satyrus ferula;NA;0.001;Satyrus ferula;0.981576971897974;  
MW378116;Lepidoptera;Satyrus ferula;NA;0.001;Satyrus ferula;0.986030595609321;  
MW378117;Lepidoptera;Satyrus ferula;NA;0.003;Satyrus ferula;0.98634948127527;  
MW378118;Lepidoptera;Satyrus ferula;NA;0.001;Satyrus ferula;0.97518377129887;  
MW378120;Lepidoptera;Satyrus ferula;NA;0.001;Satyrus ferula;0.968383059711421;  
MW378121;Lepidoptera;Iolana iolas;Iolana iolas;0.004;Iolana iolas;0.999998630757289;  
MW378122;Lepidoptera;Satyrus ferula;NA;0.003;Satyrus ferula;0.984337909759304;  
MW378123;Lepidoptera;Satyrus ferula;NA;0.002;Satyrus ferula;0.981096107982503;  
MW378128;Lepidoptera;Iolana iolas;Iolana iolas;1;Iolana iolas;0.999997520975743;  
MW378130;Lepidoptera;Iolana iolas;Iolana iolas;0.005;Iolana iolas;0.999998628870232;  
MW394241;Lepidoptera;Polyommatus icarus;NA;0.001;Polyommatus icarus;0.727091145464216;  
MW394242;Lepidoptera;Polyommatus icarus;NA;0.001;Polyommatus icarus;0.727091145464216;  
MW394243;Lepidoptera;Polyommatus icarus;NA;0.001;Polyommatus icarus;0.727091145464216;  
MW394244;Lepidoptera;Polyommatus icarus;NA;0.001;Polyommatus icarus;0.727091145464216;  
MW394245;Lepidoptera;Polyommatus icarus;NA;0.001;Polyommatus icarus;0.977943268424903;  
MW394246;Lepidoptera;Polyommatus icarus;NA;0.003;Polyommatus icarus;0.999009386034277;  
MW394247;Lepidoptera;Polyommatus icarus;NA;0.001;Polyommatus icarus;0.977943268424903;  
MW394248;Lepidoptera;Polyommatus icarus;NA;0.003;Polyommatus icarus;0.981477109781052;  
MW394249;Lepidoptera;Polyommatus icarus;NA;0.049;Polyommatus icarus;0.957291842588196;  
MW394250;Lepidoptera;Polyommatus icarus;NA;0.001;Polyommatus icarus;0.977943268424903;  
MW394251;Lepidoptera;Polyommatus icarus;NA;0.001;Polyommatus icarus;0.977943268424903;  
MW394252;Lepidoptera;Polyommatus icarus;NA;0.002;Polyommatus icarus;0.983822062474518;  
MW394253;Lepidoptera;Polyommatus icarus;NA;0.003;Polyommatus icarus;0.998748821018956;  
MW394254;Lepidoptera;Polyommatus icarus;NA;0.003;Polyommatus icarus;0.999009386034277;  
MW394255;Lepidoptera;Polyommatus icarus;NA;0.003;Polyommatus icarus;0.999009386034277;  
MW394256;Lepidoptera;Polyommatus icarus;NA;0.001;Polyommatus icarus;0.977943268424903;  
MW394257;Lepidoptera;Polyommatus icarus;NA;0.001;Polyommatus icarus;0.977943268424903;  
MW394258;Lepidoptera;Polyommatus icarus;NA;0.001;Polyommatus icarus;0.977943268424903;  
MW394259;Lepidoptera;Polyommatus icarus;NA;0.001;Polyommatus icarus;0.977943268424903;  
MW394260;Lepidoptera;Polyommatus icarus;NA;0.001;Polyommatus icarus;0.977943268424903;  
MW394261;Lepidoptera;Polyommatus icarus;NA;0.001;Polyommatus icarus;0.977943268424903;  
MW394262;Lepidoptera;Polyommatus icarus;NA;0.001;Polyommatus icarus;0.977943268424903;  
MW394263;Lepidoptera;Polyommatus icarus;NA;0.001;Polyommatus icarus;0.977943268424903;  
MW394264;Lepidoptera;Polyommatus icarus;NA;0.001;Polyommatus icarus;0.977943268424903;  
MW394265;Lepidoptera;Polyommatus icarus;NA;0.003;Polyommatus icarus;0.999009386034277;  
MW394266;Lepidoptera;Polyommatus icarus;NA;0.003;Polyommatus icarus;0.999009386034277;  
MW394267;Lepidoptera;Polyommatus icarus;NA;0.001;Polyommatus icarus;0.998379065623885;  
MW394268;Lepidoptera;Polyommatus icarus;NA;0.003;Polyommatus icarus;0.999009386034277;  
MW394269;Lepidoptera;Polyommatus icarus;NA;0.002;Polyommatus icarus;0.997603074711939;  
MW394270;Lepidoptera;Polyommatus icarus;NA;0.003;Polyommatus icarus;0.999009386034277;  
MW394271;Lepidoptera;Polyommatus icarus;NA;0.003;Polyommatus icarus;0.999009386034277;  
MW394272;Lepidoptera;Polyommatus icarus;NA;0.003;Polyommatus icarus;0.999009386034277;  
MW394273;Lepidoptera;Polyommatus icarus;NA;0.002;Polyommatus icarus;0.99834250942222;  
MW394274;Lepidoptera;Polyommatus icarus;NA;0.001;Polyommatus icarus;0.977943268424903;  
MW394275;Lepidoptera;Polyommatus icarus;NA;0.001;Polyommatus icarus;0.977943268424903;  
MW394276;Lepidoptera;Polyommatus icarus;NA;0.001;Polyommatus icarus;0.977943268424903;  
MW394277;Lepidoptera;Polyommatus icarus;NA;0.001;Polyommatus icarus;0.977943268424903;  
MW394278;Lepidoptera;Polyommatus icarus;NA;0.001;Polyommatus icarus;0.977943268424903;  
MW394279;Lepidoptera;Polyommatus icarus;NA;0.001;Polyommatus icarus;0.977943268424903;  
MW394280;Lepidoptera;Polyommatus icarus;NA;0.001;Polyommatus icarus;0.977943268424903;

MW394281;Lepidoptera;Polyommatus icarus;NA;0.001;Polyommatus icarus;0.977943268424903;  
 MW394282;Lepidoptera;Polyommatus icarus;NA;0.001;Polyommatus icarus;0.977943268424903;  
 MW394283;Lepidoptera;Polyommatus icarus;NA;0.001;Polyommatus icarus;0.977943268424903;  
 MW394284;Lepidoptera;Polyommatus icarus;NA;0.002;Polyommatus icarus;0.999448845548056;  
 MW394285;Lepidoptera;Polyommatus icarus;Polyommatus icarus;0.002;Polyommatus  
 icarus;0.999704434544003;  
 MW394286;Lepidoptera;Polyommatus icarus;NA;0.002;Polyommatus icarus;0.999448845548056;  
 MW394287;Lepidoptera;Polyommatus icarus;Polyommatus icarus;0.001;Polyommatus  
 icarus;0.999695382963171;  
 MW394288;Lepidoptera;Polyommatus icarus;NA;0.002;Polyommatus icarus;0.999448845548056;  
 MW394289;Lepidoptera;Polyommatus icarus;NA;0.001;Polyommatus icarus;0.999093072290978;  
 MW394290;Lepidoptera;Polyommatus icarus;NA;0.003;Polyommatus icarus;0.999009386034277;  
 MW394291;Lepidoptera;Polyommatus icarus;NA;0.003;Polyommatus icarus;0.999009386034277;  
 MW394292;Lepidoptera;Polyommatus icarus;NA;0.003;Polyommatus icarus;0.999009386034277;  
 MW394293;Lepidoptera;Polyommatus icarus;NA;0.003;Polyommatus icarus;0.999009386034277;  
 MW394294;Lepidoptera;Polyommatus icarus;NA;0.003;Polyommatus icarus;0.999009386034277;  
 MW394295;Lepidoptera;Polyommatus icarus;NA;NA;Polyommatus icarus;0.992255269648691;  
 MW394296;Lepidoptera;Polyommatus icarus;NA;0.003;Polyommatus icarus;0.999009386034277;  
 MW394297;Lepidoptera;Polyommatus icarus;NA;0.003;Polyommatus icarus;0.988968690370933;  
 MW394298;Lepidoptera;Polyommatus icarus;NA;0.003;Polyommatus icarus;0.999009386034277;  
 MW394299;Lepidoptera;Polyommatus icarus;NA;0.001;Polyommatus icarus;0.998276020132095;  
 MW394300;Lepidoptera;Polyommatus icarus;NA;0.003;Polyommatus icarus;0.999009386034277;  
 MW394301;Lepidoptera;Polyommatus icarus;NA;0.003;Polyommatus icarus;0.999009386034277;  
 MW394302;Lepidoptera;Polyommatus icarus;NA;0.003;Polyommatus icarus;0.999009386034277;  
 MW394303;Lepidoptera;Polyommatus icarus;NA;0.049;Polyommatus icarus;0.957291842588196;  
 MW394304;Lepidoptera;Polyommatus icarus;NA;0.001;Polyommatus icarus;0.977943268424903;  
 MW394305;Lepidoptera;Polyommatus icarus;NA;0.003;Polyommatus icarus;0.999009386034277;  
 MW394306;Lepidoptera;Polyommatus icarus;NA;0.001;Polyommatus icarus;0.977943268424903;  
 MW394307;Lepidoptera;Polyommatus icarus;NA;0.003;Polyommatus icarus;0.999009386034277;  
 MW394308;Lepidoptera;Polyommatus icarus;NA;0.001;Polyommatus icarus;0.977943268424903;  
 MW394309;Lepidoptera;Polyommatus icarus;NA;0.003;Polyommatus icarus;0.999009386034277;  
 MW394310;Lepidoptera;Polyommatus icarus;NA;0.001;Polyommatus icarus;0.977943268424903;  
 MW394311;Lepidoptera;Polyommatus icarus;NA;0.001;Polyommatus icarus;0.977943268424903;  
 MW394312;Lepidoptera;Polyommatus icarus;NA;0.003;Polyommatus icarus;0.999009386034277;  
 MW394313;Lepidoptera;Polyommatus icarus;NA;0.001;Polyommatus icarus;0.977943268424903;  
 MW394314;Lepidoptera;Polyommatus icarus;NA;0.003;Polyommatus icarus;0.999009386034277;  
 MW394315;Lepidoptera;Polyommatus icarus;NA;0.006;Polyommatus icarus;0.998026785883704;  
 MW394316;Lepidoptera;Polyommatus icarus;NA;0.003;Polyommatus icarus;0.999009386034277;  
 MW394317;Lepidoptera;Polyommatus icarus;NA;0.003;Polyommatus icarus;0.999009386034277;  
 MW394318;Lepidoptera;Polyommatus icarus;NA;0.001;Polyommatus icarus;0.997692676289814;  
 MW394319;Lepidoptera;Polyommatus icarus;NA;0.003;Polyommatus icarus;0.999009386034277;  
 MW394320;Lepidoptera;Polyommatus icarus;NA;0.001;Polyommatus icarus;0.727091145464216;  
 MW394321;Lepidoptera;Polyommatus icarus;NA;0.003;Polyommatus icarus;0.999009386034277;  
 MW394322;Lepidoptera;Polyommatus icarus;NA;0.049;Polyommatus icarus;0.957291842588196;  
 MW394323;Lepidoptera;Polyommatus icarus;NA;0.049;Polyommatus icarus;0.957291842588196;  
 MW394324;Lepidoptera;Polyommatus icarus;NA;0.049;Polyommatus icarus;0.957291842588196;  
 MW394325;Lepidoptera;Polyommatus icarus;NA;0.049;Polyommatus icarus;0.957291842588196;  
 MW394326;Lepidoptera;Polyommatus icarus;NA;0.002;Polyommatus icarus;0.983822062474518;  
 MW394327;Lepidoptera;Polyommatus icarus;NA;0.022;Polyommatus icarus;0.963538917273594;  
 MW394328;Lepidoptera;Polyommatus icarus;NA;0.049;Polyommatus icarus;0.957291842588196;  
 MW394329;Lepidoptera;Polyommatus icarus;NA;0.049;Polyommatus icarus;0.957291842588196;  
 MW394330;Lepidoptera;Polyommatus icarus;NA;0.049;Polyommatus icarus;0.957291842588196;  
 MW394331;Lepidoptera;Polyommatus icarus;NA;0.002;Polyommatus icarus;0.995325530892051;  
 MW394332;Lepidoptera;Polyommatus icarus;NA;0.003;Polyommatus icarus;0.999009386034277;  
 MW394333;Lepidoptera;Polyommatus icarus;NA;0.012;Polyommatus icarus;0.999343556117761;  
 MW394334;Lepidoptera;Polyommatus icarus;NA;0.001;Polyommatus icarus;0.999421381694355;  
 MW394335;Lepidoptera;Polyommatus icarus;NA;0.003;Polyommatus icarus;0.999009386034277;  
 MW394336;Lepidoptera;Polyommatus icarus;NA;0.003;Polyommatus icarus;0.999009386034277;  
 MW394337;Lepidoptera;Polyommatus icarus;NA;0.003;Polyommatus icarus;0.999009386034277;  
 MW394338;Lepidoptera;Polyommatus icarus;NA;0.003;Polyommatus icarus;0.999009386034277;  
 MW394340;Lepidoptera;Polyommatus icarus;NA;0.003;Polyommatus icarus;0.999009386034277;  
 MW431042;Lepidoptera;Lycaena phlaeas;Lycaena phlaeas;1;Lycaena phlaeas;0.999999990123882;  
 MW431044;Lepidoptera;Anthocharis cardamines;Anthocharis cardamines;0.006;Anthocharis  
 cardamines;0.999996725622186;  
 MW431052;Lepidoptera;Erebia medusa;NA;0.007;Erebia medusa;0.967767632689008;  
 MW498979;Lepidoptera;Hyponephele lycaon;Hyponephele lycaon;1;Hyponephele  
 lycaon;0.99999999317794;  
 MW498980;Lepidoptera;Aricia agestis;NA;0.032;Aricia agestis;0.998085927711268;  
 MW498983;Lepidoptera;Melitaea britomartis;Melitaea britomartis;NA;Melitaea  
 britomartis;0.93596070790707;  
 MW498984;Lepidoptera;Polyommatus amandus;Polyommatus amandus;0.004;Polyommatus  
 amandus;0.999975751918124;  
 MW498985;Lepidoptera;Limenitis populi;Limenitis populi;1;Limenitis populi;0.99999999859654;  
 MW498994;Lepidoptera;Nymphalis io;NA;0.491;Aglais io;0.930153237246992;  
 MW498995;Lepidoptera;Carcharodus alceae;Carcharodus floccifera;0.005;Carcharodus  
 alceae;0.999996827462384;  
 MW498998;Lepidoptera;Boloria dia;Boloria dia;1;Boloria dia;0.99999999980503;  
 MW498999;Lepidoptera;Plebejus idas;NA;0.001;NA;0.99913303429352;

MW499001;Lepidoptera;Nymphalis egea;Polygonia egea;1;Polygonia egea;0.999999758078475;  
MW499002;Lepidoptera;Polyommatus dorylas;NA;0.005;Polyommatus dorylas;0.994513018058347;  
MW499003;Lepidoptera;Cercyonis lupina;Hyponephele lupina;1;Hyponephele lupina;0.999999954699491;  
MW499006;Lepidoptera;Colias phicomone;NA;0.001;Colias phicomone;0.985598879697681;  
MW499008;Lepidoptera;Polyommatus amandus;Polyommatus amandus;0.007;Polyommatus  
amandus;0.999944246955852;  
MW499009;Lepidoptera;Gonepteryx rhamni;NA;0.474;Gonepteryx rhamni;0.982076396127858;  
MW499010;Lepidoptera;Araschnia levana;Araschnia levana;1;Araschnia levana;0.999999772187832;  
MW499011;Lepidoptera;Satyrium spini;Satyrium spini;1;Satyrium spini;0.999999763531661;  
MW499012;Lepidoptera;Limenitis camilla;Limenitis camilla;0.009;Limenitis  
camilla;0.9999828626808;  
MW499013;Lepidoptera;Anthocharis cardamines;Anthocharis cardamines;1;Anthocharis  
cardamines;0.999999940675226;  
MW499014;Lepidoptera;Colias hyale;NA;0.493;Colias hyale;0.999942431878347;  
MW499015;Lepidoptera;Nymphalis c-album;NA;0.215;NA;0.999999192918557;  
MW499019;Lepidoptera;Aricia eumedon;Eumedonia eumedon;0.015;Eumedonia eumedon;0.98991871778437;  
MW499020;Lepidoptera;Erebia stiria;NA;NA;Erebia styx;0.890739244956497;  
MW499021;Lepidoptera;Euphydryas maturna;NA;0.135;Euphydryas maturna;0.871258387000532;  
MW499022;Lepidoptera;Coenonympha pamphilus;Coenonympha pamphilus;1;Coenonympha  
pamphilus;0.999999999999744;  
MW499026;Lepidoptera;Pyrgus alveus;NA;NA;Pyrgus alveus;0.941697735568124;  
MW499027;Lepidoptera;Thymelicus sylvestris;NA;0.131;Thymelicus sylvestris;0.999961574491035;  
MW499029;Lepidoptera;Cercyonis lupina;Hyponephele lupina;1;Hyponephele lupina;0.99999966429357;  
MW499032;Lepidoptera;Erebia pharte;Erebia pharte;1;Erebia pharte;0.9999999630495;  
MW499033;Lepidoptera;Satyrium pruni;NA;0.076;Satyrium pruni;0.990322364021655;  
MW499037;Lepidoptera;Plebejus argus;NA;NA;Plebejus argus;0.973283205133445;  
MW499041;Lepidoptera;Pyrgus carthami;Pyrgus carthami;1;Pyrgus carthami;0.999999487177451;  
MW499042;Lepidoptera;Pieris napi;NA;0.011;Pieris napi;0.801985394724814;  
MW499043;Lepidoptera;Lycaena phlaeas;Lycaena phlaeas;1;Lycaena phlaeas;0.99999996363186;  
MW499044;Lepidoptera;Erebia euryale;NA;NA;Erebia euryale;0.890255534762916;  
MW499045;Lepidoptera;Boloria titania;Boloria titania;0.001;Boloria titania;0.99983358374111;  
MW499048;Lepidoptera;Argynnis paphia;Argynnis paphia;1;Argynnis paphia;0.99999991389927;  
MW499049;Lepidoptera;Thymelicus lineola;Thymelicus lineola;1;Thymelicus  
lineola;0.999995927238524;  
MW499053;Lepidoptera;Lycaena tityrus;Lycaena tityrus;1;Lycaena tityrus;0.999995729087172;  
MW499054;Lepidoptera;Chazara briseis;Chazara briseis;1;Chazara briseis;0.999980393060755;  
MW499055;Lepidoptera;Apatura ilia;NA;0.165;Apatura ilia;0.956796812031481;  
MW499059;Lepidoptera;Lycaena tityrus;Lycaena tityrus;1;Lycaena tityrus;0.999998928238034;  
MW499062;Lepidoptera;Pyrgus carthami;Pyrgus carthami;1;Pyrgus carthami;0.999999520264824;  
MW499066;Lepidoptera;Lasiommata megera;Lasiommata megera;0.006;Lasiommata  
megera;0.992588117195958;  
MW499069;Lepidoptera;Arethusana arethusa;NA;0.062;Arethusana arethusa;0.999953862792797;  
MW499070;Lepidoptera;Pyrgus alveus;NA;0.003;NA;0.99999999997732;  
MW499071;Lepidoptera;Hipparchia hermione;NA;NA;NA;0.999999999999978;  
MW499073;Lepidoptera;Coenonympha pamphilus;Coenonympha pamphilus;1;Coenonympha  
pamphilus;0.999999999999659;  
MW499074;Lepidoptera;Melitaea didyma;Melitaea didyma;1;Melitaea didyma;0.995536640283604;  
MW499076;Lepidoptera;Helleia helle;Lycaena helle;1;Lycaena helle;0.999999984510879;  
MW499077;Lepidoptera;Gonepteryx rhamni;NA;0.474;Gonepteryx rhamni;0.982076396127858;  
MW499082;Lepidoptera;Thymelicus sylvestris;NA;0.324;Thymelicus sylvestris;0.999940778442454;  
MW499083;Lepidoptera;Aricia cramera;Aricia cramera;1;Aricia cramera;0.999990014848976;  
MW499084;Lepidoptera;Arethusana arethusa;NA;0.153;Arethusana arethusa;0.999652039046744;  
MW499087;Lepidoptera;Carcharodus alceae;Carcharodus alceae;NA;Carcharodus  
alceae;0.999998232251556;  
MW499092;Lepidoptera;Erebia euryale;NA;NA;Erebia euryale;0.971976910059117;  
MW499095;Lepidoptera;Coenonympha arcania;NA;0.002;NA;0.999999999999925;  
MW499096;Lepidoptera;Nymphalis io;NA;0.491;Aglais io;0.930153237246992;  
MW499101;Lepidoptera;Coenonympha pamphilus;Coenonympha pamphilus;1;Coenonympha  
pamphilus;0.999999999999744;  
MW499104;Lepidoptera;Polyommatus amandus;Polyommatus amandus;0.004;Polyommatus  
amandus;0.999986259154429;  
MW499105;Lepidoptera;Callophrys rubi;NA;0.003;Callophrys rubi;0.997328639918919;  
MW499106;Lepidoptera;Colias palaeno;NA;0.001;NA;0.999999999973333;  
MW499107;Lepidoptera;Hipparchia semele;NA;0.002;Hipparchia semele;0.807780383202924;  
MW499108;Lepidoptera;Satyrium spini;Satyrium spini;1;Satyrium spini;0.999998820447998;  
MW499110;Lepidoptera;Colias phicomone;NA;0.001;Colias phicomone;0.985598879697681;  
MW499113;Lepidoptera;Parnassius apollo;Parnassius apollo;1;Parnassius apollo;0.991653976112911;  
MW499114;Lepidoptera;Agriades optilete;Agriades optilete;1;Agriades optilete;0.999999945533348;  
MW499116;Lepidoptera;Pyrgus onopordi;Pyrgus onopordi;1;Pyrgus onopordi;0.999997111229755;  
MW499117;Lepidoptera;Polyommatus escheri;Polyommatus escheri;1;Polyommatus  
escheri;0.999999993433477;  
MW499118;Lepidoptera;Erebia epiphron;NA;NA;Erebia epiphron;0.991706021322286;  
MW499119;Lepidoptera;Erebia neoridas;NA;NA;Erebia neoridas;0.997112686054603;  
MW499120;Lepidoptera;Coenonympha gardetta;NA;0.113;Coenonympha arcania;0.74313160272224;  
MW499123;Lepidoptera;Euphydryas aurinia;NA;0.31;Euphydryas aurinia;0.993387708761386;  
MW499124;Lepidoptera;Boloria selene;NA;0.067;Boloria selene;0.999996142370799;  
MW499131;Lepidoptera;Boloria selene;NA;0.281;Boloria selene;0.999999606392712;  
MW499133;Lepidoptera;Thymelicus acteon;Thymelicus acteon;1;Thymelicus acteon;0.99999993922671;

MW499134;Lepidoptera;Parnassius apollo;Parnassius apollo;1;Parnassius apollo;0.992704703916692;  
MW499135;Lepidoptera;Erebia meolans;NA;NA;Erebia meolans;0.999558897580846;  
MW499137;Lepidoptera;Polyommatus amandus;Polyommatus amandus;0.002;Polyommatus  
amandus;0.99998879592523;  
MW499139;Lepidoptera;Agriades orbitulus;NA;0.095;Agriades orbitulus;0.998846976809854;  
MW499140;Lepidoptera;Cupido minimus;NA;0.005;Cupido minimus;0.999495730412776;  
MW499142;Lepidoptera;Gonepteryx rhamni;NA;0.474;Gonepteryx rhamni;0.982076396127858;  
MW499147;Lepidoptera;Cupido minimus;NA;0.006;Cupido minimus;0.999768371759258;  
MW499150;Lepidoptera;Lycaena dispar;Lycaena dispar;1;Lycaena dispar;0.99999990743959;  
MW499151;Lepidoptera;Melitaea didyma;Melitaea didyma;1;Melitaea didyma;0.995536640283604;  
MW499152;Lepidoptera;Anthocharis cardamines;Anthocharis cardamines;0.001;Anthocharis  
cardamines;0.9999999563548;  
MW499153;Lepidoptera;Colias alfacariensis;Colias alfacariensis;0.001;Colias  
alfacariensis;0.999966522684745;  
MW499154;Lepidoptera;Melitaea didyma;Melitaea didyma;0.001;Melitaea didyma;0.989540662318705;  
MW499155;Lepidoptera;Plebejus idas;NA;0.001;NA;0.988098477943813;  
MW499158;Lepidoptera;Coenonympha glycerion;NA;0.105;Coenonympha glycerion;0.999997095411044;  
MW499159;Lepidoptera;Vanessa cardui;Vanessa cardui;1;Vanessa cardui;0.99999459983318;  
MW499161;Lepidoptera;Erebia ottomana;Erebia ottomana;1;Erebia ottomana;0.99999994283371;  
MW499162;Lepidoptera;Melanargia galathea;Melanargia galathea;NA;Melanargia  
galathea;0.981855578470499;  
MW499163;Lepidoptera;Fabriciana adippe;Fabriciana adippe;0.028;Fabriciana  
adippe;0.969769198942097;  
MW499164;Lepidoptera;Aglais urticae;NA;0.002;Aglais urticae;0.987497593219019;  
MW499165;Lepidoptera;Polyommatus amandus;Polyommatus amandus;0.003;Polyommatus  
amandus;0.999980071833264;  
MW499166;Lepidoptera;Pyrgus andromedae;Pyrgus andromedae;0.001;Pyrgus  
andromedae;0.998828669843251;  
MW499167;Lepidoptera;Plebejus argus;NA;0.112;Plebejus argus;0.964043871125174;  
MW499168;Lepidoptera;Euphydryas maturna;NA;0.126;Euphydryas maturna;0.885705216462044;  
MW499170;Lepidoptera;Polyommatus eros;NA;0.001;Polyommatus eros;0.863598753993334;  
MW499171;Lepidoptera;Erebia oeme;NA;0.114;Erebia oeme;0.99999999830635;  
MW499174;Lepidoptera;Maniola jurtina;NA;NA;NA;0.99999999997812;  
MW499175;Lepidoptera;Coenonympha pamphilus;Coenonympha pamphilus;1;Coenonympha  
pamphilus;0.999999999999886;  
MW499177;Lepidoptera;Lycaena phlaeas;Lycaena phlaeas;1;Lycaena phlaeas;0.999999996363186;  
MW499178;Lepidoptera;Lampides boeticus;Lampides boeticus;1;Lampides boeticus;0.9999999872125;  
MW499180;Lepidoptera;Erebia medusa;NA;0.002;Erebia medusa;0.991052367627986;  
MW499181;Lepidoptera;Argynnis paphia;Argynnis paphia;1;Argynnis paphia;0.999999991389927;  
MW499182;Lepidoptera;Maniola jurtina;NA;0.331;NA;0.99999999999253;  
MW499185;Lepidoptera;Celastrina argiolus;Celastrina argiolus;1;Celastrina  
argiolus;0.999527385150531;  
MW499186;Lepidoptera;Argynnis aglaja;NA;NA;NA;0.99999999998051;  
MW499189;Lepidoptera;Satyrium spini;Satyrium spini;1;Satyrium spini;0.999999115451253;  
MW499192;Lepidoptera;Melitaea diamina;NA;0.305;Melitaea diamina;0.99999994065661;  
MW499194;Lepidoptera;Colias palaeno;NA;0.001;NA;0.99999999982869;  
MW499195;Lepidoptera;Euphydryas intermedia;NA;NA;NA;0.99999999996973;  
MW499197;Lepidoptera;Polyommatus escheri;Polyommatus escheri;1;Polyommatus  
escheri;0.999999122411013;  
MW499201;Lepidoptera;Aricia agestis;NA;0.253;Aricia agestis;0.996350017387504;  
MW499204;Lepidoptera;Agriades glandon;NA;NA;Agriades glandon;0.986958609491942;  
MW499205;Lepidoptera;Polyommatus eros;NA;0.001;Polyommatus eros;0.885686323723006;  
MW499207;Lepidoptera;Coenonympha pamphilus;Coenonympha pamphilus;1;Coenonympha  
pamphilus;0.99999999999744;  
MW499208;Lepidoptera;Erebia medusa;NA;0.009;Erebia medusa;0.986275612856827;  
MW499211;Lepidoptera;Pyrgus foulquieri;NA;NA;Pyrgus alveus;0.827119616974978;  
MW499213;Lepidoptera;Plebejus argus;NA;NA;Plebejus argus;0.966835982395058;  
MW499214;Lepidoptera;Araschnia levana;Araschnia levana;1;Araschnia levana;0.999999772187832;  
MW499215;Lepidoptera;Argynnis aglaja;NA;NA;NA;0.99999999998051;  
MW499216;Lepidoptera;Melitaea nevadensis;NA;0.003;Melitaea celadussa;0.748263429472908;  
MW499217;Lepidoptera;Coenonympha arcania;NA;0.001;NA;0.99999999999975;  
MW499218;Lepidoptera;Satyrium ilicis;NA;0.001;Satyrium ilicis;0.821367801940632;  
MW499219;Lepidoptera;Cupido osiris;Cupido osiris;1;Cupido osiris;0.999974988645513;  
MW499221;Lepidoptera;Pyrgus armoricanus;Pyrgus armoricanus;1;Pyrgus  
armoricanus;0.997478680096412;  
MW499222;Lepidoptera;Maniola jurtina;NA;0.02;NA;0.99999999999284;  
MW499227;Lepidoptera;Melanargia galathea;Melanargia galathea;NA;Melanargia  
galathea;0.931728334890368;  
MW499228;Lepidoptera;Polyommatus damon;Polyommatus damon;1;Polyommatus damon;0.999999554219229;  
MW499229;Lepidoptera;Colias crocea;NA;NA;NA;0.99999999999797;  
MW499231;Lepidoptera;Apatura ilia;NA;0.039;Apatura ilia;0.977274423026401;  
MW499234;Lepidoptera;Cercyonis lupina;Hyponephele lupina;1;Hyponephele lupina;0.999999761132642;  
MW499235;Lepidoptera;Erebia eriphyle;Erebia eriphyle;1;Erebia eriphyle;0.99999990739212;  
MW499241;Lepidoptera;Pyrgus malvoides;NA;0.176;Pyrgus malvoides;0.940490890379026;  
MW499242;Lepidoptera;Plebejus idas;NA;0.007;NA;0.999546324331549;  
MW499243;Lepidoptera;Pieris napi;NA;0.028;Pieris napi;0.888205720664699;  
MW499244;Lepidoptera;Colias hyale;Colias hyale;0.015;Colias hyale;0.999997884296128;  
MW499245;Lepidoptera;Gonepteryx rhamni;NA;0.474;Gonepteryx rhamni;0.982076396127858;



MW499246;Lepidoptera;Pyrgus andromedae;Pyrgus andromedae;0.001;Pyrgus andromedae;0.998828669843251;  
MW499247;Lepidoptera;Brenthis hecate;NA;0.333;Brenthis hecate;0.999266429293319;  
MW499249;Lepidoptera;Argynnis paphia;Argynnis paphia;1;Argynnis paphia;0.999999991389927;  
MW499253;Lepidoptera;Thymelicus sylvestris;NA;0.14;Thymelicus sylvestris;0.999963443881537;  
MW499254;Lepidoptera;Agriades optilete;Agriades optilete;1;Agriades optilete;0.99999999183251;  
MW499255;Lepidoptera;Maniola jurtina;NA;0.192;NA;0.999999999999221;  
MW499256;Lepidoptera;Cercyonis lupina;Hyponephele lupina;1;Hyponephele lupina;0.999998716128942;  
MW499257;Lepidoptera;Hipparchia semele;NA;NA;NA;0.999999999999978;  
MW499259;Lepidoptera;Lysandra coridon;NA;NA;NA;0.99938194874433;  
MW499260;Lepidoptera;Polyommatus amandus;Polyommatus amandus;0.006;Polyommatus amandus;0.999984603640236;  
MW499261;Lepidoptera;Pyrgus warrenensis;NA;0.003;NA;0.999999999997732;  
MW499262;Lepidoptera;Aphantopus hyperantus;Aphantopus hyperantus;0.003;Aphantopus hyperantus;0.999999455871523;  
MW499264;Lepidoptera;Pyrgus armoricanus;Pyrgus armoricanus;1;Pyrgus armoricanus;0.999997826373377;  
MW499265;Lepidoptera;Boloria graeca;Boloria graeca;1;Boloria graeca;0.999999912715485;  
MW499267;Lepidoptera;Limenitis populi;Limenitis populi;1;Limenitis populi;0.99999999859654;  
MW499271;Lepidoptera;Erebia euryale;NA;NA;Erebia euryale;0.919518760623792;  
MW499273;Lepidoptera;Brenthis ino;Brenthis ino;0.001;Brenthis ino;0.994711912827522;  
MW499274;Lepidoptera;Aglais urticae;Aglais urticae;0.001;Aglais urticae;0.990690600684087;  
MW499276;Lepidoptera;Pyrgus cacaliae;Pyrgus cacaliae;0.998;Pyrgus cacaliae;0.997762925598787;  
MW499277;Lepidoptera;Helleia helle;Lycaena helle;1;Lycaena helle;0.999999988063536;  
MW499279;Lepidoptera;Erebia medusa;NA;0.039;Erebia medusa;0.950438115117465;  
MW499281;Lepidoptera;Aricia eumedon;Eumedonia eumedon;0.001;Eumedonia eumedon;0.999006696643375;  
MW499284;Lepidoptera;Maniola tithonus;Pyronia tithonus;1;Pyronia tithonus;1;  
MW499285;Lepidoptera;Plebejus argus;NA;0.157;Plebejus argus;0.929626433008894;  
MW499288;Lepidoptera;Favonius quercus;NA;NA;Favonius quercus;0.73046069582187;  
MW499289;Lepidoptera;Carcharodus lavatherae;NA;0.221;Carcharodus lavatherae;0.997497103905344;  
MW499291;Lepidoptera;Agriades optilete;Agriades optilete;1;Agriades optilete;0.999999962913933;  
MW499292;Lepidoptera;Boloria selene;NA;0.001;Boloria selene;0.999995370701811;  
MW499294;Lepidoptera;Boloria thore;Boloria thore;1;Boloria thore;0.99999998359726;  
MW499296;Lepidoptera;Erynnis tages;Erynnis tages;1;Erynnis tages;0.999999253822119;  
MW499298;Lepidoptera;Oeneis glacialis;NA;NA;Oeneis glacialis;0.894225823747824;  
MW499299;Lepidoptera;Araschnia levana;Araschnia levana;1;Araschnia levana;0.999999772187832;  
MW499300;Lepidoptera;Chazara briseis;NA;0.003;Chazara briseis;0.997487876778111;  
MW499301;Lepidoptera;Parnassius apollo;Parnassius apollo;1;Parnassius apollo;0.992704703916692;  
MW499302;Lepidoptera;Melanargia galathea;Melanargia galathea;NA;Melanargia galathea;0.987561356582775;  
MW499303;Lepidoptera;Maniola jurtina;NA;0.02;NA;0.999999999999284;  
MW499304;Lepidoptera;Hipparchia semele;NA;0.002;Hipparchia semele;0.807780383202924;  
MW499306;Lepidoptera;Melitaea diamina;NA;0.149;Melitaea diamina;0.999999996592464;  
MW499308;Lepidoptera;Maniola jurtina;NA;0.001;Maniola jurtina;0.939220105860875;  
MW499309;Lepidoptera;Callophrys rubi;NA;0.003;Callophrys rubi;0.997328639918919;  
MW499310;Lepidoptera;Hipparchia fagi;NA;NA;Hipparchia fagi;0.894416013924449;  
MW499311;Lepidoptera;Erynnis tages;Erynnis tages;1;Erynnis tages;0.999955880826156;  
MW499314;Lepidoptera;Boloria euphrosyne;Boloria euphrosyne;0.968;Boloria euphrosyne;0.999975461078619;  
MW499316;Lepidoptera;Melitaea diamina;Melitaea diamina;0.024;Melitaea diamina;0.999999982621972;  
MW499317;Lepidoptera;Pieris napi;NA;0.011;Pieris napi;0.801985394724814;  
MW499318;Lepidoptera;Scolitantides orion;Scolitantides orion;1;Scolitantides orion;0.999999984804305;  
MW499319;Lepidoptera;Erebia pandrose;NA;0.002;Erebia pandrose;0.992554419564045;  
MW499320;Lepidoptera;Erebia ottomana;Erebia ottomana;1;Erebia ottomana;0.999999997526373;  
MW499322;Lepidoptera;Helleia helle;Lycaena helle;1;Lycaena helle;0.999999982046518;  
MW499323;Lepidoptera;Thymelicus lineola;Thymelicus lineola;1;Thymelicus lineola;0.999933767664954;  
MW499324;Lepidoptera;Glaucopsyche alexis;NA;NA;Glaucopsyche alexis;0.899237597871183;  
MW499326;Lepidoptera;Pyrgus foulquieri;NA;NA;Pyrgus alveus;0.827119616974978;  
MW499327;Lepidoptera;Melanargia galathea;Melanargia galathea;NA;Melanargia galathea;0.981855578470499;  
MW499328;Lepidoptera;Erebia pandrose;NA;NA;Erebia pandrose;0.993612919083967;  
MW499329;Lepidoptera;Polyommatus icarus;NA;0.003;Polyommatus icarus;0.998348220031726;  
MW499331;Lepidoptera;Coenonympha pamphilus;Coenonympha pamphilus;1;Coenonympha pamphilus;0.999999999999744;  
MW499333;Lepidoptera;Nymphalis io;NA;0.491;Aglais io;0.930153237246992;  
MW499335;Lepidoptera;Glaucopsyche alexis;NA;NA;Glaucopsyche alexis;0.969998277832517;  
MW499336;Lepidoptera;Fabriciana adippe;Fabriciana adippe;0.007;Fabriciana adippe;0.993943750142209;  
MW499337;Lepidoptera;Euphydryas maturna;NA;NA;NA;0.999999999996973;  
MW499338;Lepidoptera;Pyrgus carlinae;NA;0.066;Pyrgus carlinae;0.857518050686745;  
MW499339;Lepidoptera;Hyponephele lycaon;Hyponephele lycaon;1;Hyponephele lycaon;0.99999999200696;  
MW499340;Lepidoptera;Apatura ilia;NA;0.018;Apatura ilia;0.975920355987971;  
MW499342;Lepidoptera;Melitaea nevadensis;NA;NA;NA;0.999999999828008;  
MW499343;Lepidoptera;Argynnis aglaja;NA;NA;NA;0.99999999999634;

MW499345;Lepidoptera;Coenonympha pamphilus;Coenonympha pamphilus;1;Coenonympha  
pamphilus;0.999999999999574;  
MW499347;Lepidoptera;Scolitantides orion;Scolitantides orion;1;Scolitantides  
orion;0.99999984804305;  
MW499348;Lepidoptera;Erebia mnestra;Erebia mnestra;0.002;Erebia mnestra;0.999916977821046;  
MW499350;Lepidoptera;Nymphalis antiopa;NA;0.23;Nymphalis antiopa;0.999999944198096;  
MW499352;Lepidoptera;Erynnis tages;Erynnis tages;1;Erynnis tages;0.99999281987018;  
MW499354;Lepidoptera;Callophrys rubi;NA;0.001;Callophrys rubi;0.996350241998792;  
MW499356;Lepidoptera;Boloria selene;NA;0.281;Boloria selene;0.999999606392712;  
MW499357;Lepidoptera;Limenitis populi;Limenitis populi;1;Limenitis populi;0.9999999991303;  
MW499358;Lepidoptera;Erebia pluto;Erebia pluto;1;Erebia pluto;0.99999921883617;  
MW499360;Lepidoptera;Pyrgus andromedae;Pyrgus andromedae;1;Pyrgus andromedae;0.999237885456662;  
MW499362;Lepidoptera;Arethusana arethusa;NA;0.062;Arethusana arethusa;0.999953862792797;  
MW499363;Lepidoptera;Erebia oeme;NA;0.039;Erebia oeme;0.99999999644785;  
MW499364;Lepidoptera;Thymelicus sylvestris;NA;0.324;Thymelicus sylvestris;0.999940778442454;  
MW499366;Lepidoptera;Boloria thore;Boloria thore;1;Boloria thore;0.99999998359726;  
MW499367;Lepidoptera;Coenonympha gardetta;NA;0.12;NA;0.99999999999993;  
MW499368;Lepidoptera;Coenonympha pamphilus;Coenonympha pamphilus;1;Coenonympha  
pamphilus;0.99999999999744;  
MW499370;Lepidoptera;Melanargia galathea;Melanargia galathea;NA;Melanargia  
galathea;0.970417110336134;  
MW499371;Lepidoptera;Lasiommata maera;Lasiommata maera;0.998;Lasiommata maera;0.999997365757056;  
MW499373;Lepidoptera;Aphantopus hyperantus;Aphantopus hyperantus;NA;Aphantopus  
hyperantus;0.998472427616515;  
MW499375;Lepidoptera;Erebia melampus;Erebia melampus;0.011;Erebia melampus;0.975499903768874;  
MW499377;Lepidoptera;Hipparchia semele;NA;0.001;Hipparchia semele;0.788446211866167;  
MW499378;Lepidoptera;Pyrgus malvae;Pyrgus malvae;NA;Pyrgus malvae;0.980121140374433;  
MW499380;Lepidoptera;Thymelicus lineola;Thymelicus lineola;1;Thymelicus  
lineola;0.999909792249012;  
MW499382;Lepidoptera;Aricia agestis;NA;0.253;Aricia agestis;0.996350017387504;  
MW499386;Lepidoptera;Carterocephalus palaemon;NA;NA;Carterocephalus palaemon;0.928500939357721;  
MW499387;Lepidoptera;Melitaea didyma;Melitaea didyma;1;Melitaea didyma;0.995536640283604;  
MW499388;Lepidoptera;Melitaea diamina;Melitaea diamina;0.025;Melitaea diamina;0.99999979345887;  
MW499389;Lepidoptera;Melitaea diamina;NA;0.305;Melitaea diamina;0.999999994065661;  
MW499390;Lepidoptera;Thymelicus sylvestris;NA;0.05;Thymelicus sylvestris;0.9992737125422;  
MW499392;Lepidoptera;Aricia artaxerxes;NA;0.394;Aricia artaxerxes;0.999502890976379;  
MW499394;Lepidoptera;Anthocharis damone;Anthocharis damone;1;Anthocharis  
damone;0.999998457691272;  
MW499395;Lepidoptera;Brenthis hecate;NA;0.133;Brenthis hecate;0.999680427441898;  
MW499397;Lepidoptera;Colias palaeno;NA;0.001;NA;0.99999999982869;  
MW499400;Lepidoptera;Brenthis daphne;NA;0.183;NA;0.99999999814056;  
MW499402;Lepidoptera;Thecla betulae;Thecla betulae;1;Thecla betulae;0.99999999972886;  
MW499403;Lepidoptera;Celastrina argiolus;Celastrina argiolus;1;Celastrina  
argiolus;0.999708846309046;  
MW499406;Lepidoptera;Helleia helle;Lycaena helle;1;Lycaena helle;0.99999993533947;  
MW499407;Lepidoptera;Lysandra coridon;Lysandra coridon;NA;Lysandra coridon;0.735779770406819;  
MW499410;Lepidoptera;Cupido argiades;NA;NA;NA;0.99999999935235;  
MW499415;Lepidoptera;Nymphalis c-album;NA;0.215;NA;0.99999192918557;  
MW499417;Lepidoptera;Favonius quercus;Favonius quercus;0.003;Favonius quercus;0.996028202844395;  
MW499421;Lepidoptera;Ochlodes sylvanus;NA;0.316;Ochlodes sylvanus;0.996318754838625;  
MW499422;Lepidoptera;Argynnis paphia;Argynnis paphia;1;Argynnis paphia;0.99999991389927;  
MW499424;Lepidoptera;Ochlodes sylvanus;NA;0.316;Ochlodes sylvanus;0.996318754838625;  
MW499426;Lepidoptera;Carcharodus alceae;Carcharodus alceae;0.999;Carcharodus  
alceae;0.99999996339511;  
MW499427;Lepidoptera;Boloria titania;Boloria titania;0.001;Boloria titania;0.99983358374111;  
MW499429;Lepidoptera;Erebia styx;NA;0.114;Erebia styx;0.897153119034683;  
MW499432;Lepidoptera;Erebia euryale;NA;NA;Erebia euryale;0.919518760623792;  
MW499433;Lepidoptera;Pyrgus malvae;Pyrgus malvae;NA;Pyrgus malvae;0.980121140374433;  
MW499434;Lepidoptera;Maniola tithonus;Pyronia tithonus;1;Pyronia tithonus;1;  
MW499435;Lepidoptera;Thecla betulae;Thecla betulae;1;Thecla betulae;0.99999999972886;  
MW499437;Lepidoptera;Coenonympha glycerion;NA;0.315;Coenonympha glycerion;0.9999902116826;  
MW499439;Lepidoptera;Erebia ottomana;Erebia ottomana;1;Erebia ottomana;0.9999999521927;  
MW499442;Lepidoptera;Polyommatus dorylas;Polyommatus dorylas;0.008;Polyommatus  
dorylas;0.991281865899703;  
MW499443;Lepidoptera;Erebia tyndarus;NA;NA;NA;0.99999999999923;  
MW499444;Lepidoptera;Pyrgus alveus;NA;NA;NA;0.99999999995963;  
MW499447;Lepidoptera;Melanargia galathea;Melanargia galathea;NA;Melanargia  
galathea;0.941395522784779;  
MW499448;Lepidoptera;Polyommatus icarus;Polyommatus icarus;0.001;Polyommatus  
icarus;0.999851522482238;  
MW499451;Lepidoptera;Pyrgus armoricanus;Pyrgus armoricanus;1;Pyrgus  
armoricanus;0.99997353848817;  
MW499453;Lepidoptera;Parnassius apollo;Parnassius apollo;0.001;Parnassius  
apollo;0.990324615460216;  
MW499454;Lepidoptera;Erebia medusa;NA;0.04;Erebia medusa;0.984042649596477;  
MW499456;Lepidoptera;Aricia agestis;NA;0.067;Aricia agestis;0.999509743227786;  
MW499457;Lepidoptera;Nymphalis c-album;NA;0.215;NA;0.99999192918557;  
MW499458;Lepidoptera;Erebia ottomana;Erebia ottomana;1;Erebia ottomana;0.99999994283371;

MW499460;Lepidoptera;Erebia montana;Erebia montana;1;Erebia montana;0.99905080170195;  
MW499461;Lepidoptera;Plebejus argus;NA;0.271;Plebejus argus;0.958217805268533;  
MW499462;Lepidoptera;Hipparchia fagi;NA;NA;Hipparchia fagi;0.941692818256625;  
MW499463;Lepidoptera;Polyommatus daphnis;NA;0.025;Polyommatus daphnis;0.981646629230216;  
MW499464;Lepidoptera;Lycaena virgaureae;NA;0.186;Lycaena virgaureae;0.999491227342155;  
MW499468;Lepidoptera;Lasiommata megera;Lasiommata megera;1;Lasiommata megera;0.999379144055441;  
MW499469;Lepidoptera;Erebia christi;Erebia christi;1;Erebia christi;0.99999999983089;  
MW499474;Lepidoptera;Ochlodes sylvanus;NA;0.316;Ochlodes sylvanus;0.996318754838625;  
MW499481;Lepidoptera;Argynnis paphia;Argynnis paphia;1;Argynnis paphia;0.999999991389927;  
MW499482;Lepidoptera;Apatura ilia;NA;0.011;Apatura ilia;0.975447372254754;  
MW499484;Lepidoptera;Carcharodus lavatherae;NA;0.108;Carcharodus lavatherae;0.998927718400682;  
MW499485;Lepidoptera;Erebia euryale;NA;NA;Erebia euryale;0.919518760623792;  
MW499486;Lepidoptera;Fabriciana niobe;Fabriciana niobe;0.001;Fabriciana niobe;0.90103065877981;  
MW499490;Lepidoptera;Erynnis tages;Erynnis tages;1;Erynnis tages;0.999999281987018;  
MW499492;Lepidoptera;Glaucopsyche alexis;NA;NA;Glaucopsyche alexis;0.979381169624069;  
MW499493;Lepidoptera;Thymelicus lineola;Thymelicus lineola;1;Thymelicus lineola;0.999971535093703;  
MW499494;Lepidoptera;Lycaena virgaureae;NA;0.137;Lycaena virgaureae;0.999262796759878;  
MW499495;Lepidoptera;Erebia melampus;Erebia melampus;NA;Erebia melampus;0.947570619386055;  
MW499496;Lepidoptera;Erebia montana;Erebia montana;1;Erebia montana;0.999532824220021;  
MW499497;Lepidoptera;Coenonympha rhodopensis;Coenonympha rhodopensis;0.001;Coenonympha rhodopensis;0.964625353288663;  
MW499498;Lepidoptera;Carcharodus alceae;Carcharodus alceae;0.999;Carcharodus alceae;0.999999998008462;  
MW499499;Lepidoptera;Fabriciana adippe;NA;NA;Fabriciana adippe;0.900255826442102;  
MW499500;Lepidoptera;Colias crocea;NA;0.059;NA;0.99999999999738;  
MW499503;Lepidoptera;Pyrgus alveus;NA;NA;NA;0.999999999995618;  
MW499509;Lepidoptera;Erebia pandrose;Erebia pandrose;0.006;Erebia pandrose;0.98986610593722;  
MW499510;Lepidoptera;Polyommatus icarus;NA;0.008;Polyommatus icarus;0.963463904737883;  
MW499517;Lepidoptera;Coenonympha glycerion;NA;0.28;Coenonympha glycerion;0.999998036263913;  
MW499518;Lepidoptera;Plebejus argus;NA;0.123;Plebejus argus;0.980927835351298;  
MW499520;Lepidoptera;Erebia tyndarus;NA;NA;NA;0.99999999999726;  
MW499521;Lepidoptera;Aricia agestis;NA;0.253;Aricia agestis;0.996350017387504;  
MW499522;Lepidoptera;Erebia oeme;NA;0.039;Erebia oeme;0.999999999644785;  
MW499526;Lepidoptera;Polyommatus humedasa;Polyommatus humedasa;1;Polyommatus humedasa;0.997627527054125;  
MW499531;Lepidoptera;Anthocharis damone;Anthocharis damone;0.001;Anthocharis damone;0.999982924679681;  
MW499532;Lepidoptera;Melitaea britomartis;NA;NA;Melitaea britomartis;0.967605280992595;  
MW499533;Lepidoptera;Erebia pronoe;Erebia pronoe;1;Erebia pronoe;0.999639549642344;  
MW499534;Lepidoptera;Aricia artaxerxes;NA;0.394;Aricia artaxerxes;0.999502890976379;  
MW499535;Lepidoptera;Erebia medusa;NA;0.04;Erebia medusa;0.984042649596477;  
MW499536;Lepidoptera;Aricia eumedon;Eumedonia eumedon;1;Eumedonia eumedon;0.999132237617768;  
MW499537;Lepidoptera;Colias hyale;Colias hyale;0.015;Colias hyale;0.999997884296128;  
MW499538;Lepidoptera;Nymphalis io;NA;0.464;Aglais io;0.736688769576782;  
MW499539;Lepidoptera;Polyommatus eros;NA;0.001;Polyommatus eros;0.863598753993334;  
MW499540;Lepidoptera;Plebejus argus;NA;0.328;Plebejus argus;0.969789734199889;  
MW499541;Lepidoptera;Cupido argiades;NA;0.499;NA;0.999999999984682;  
MW499542;Lepidoptera;Ochlodes sylvanus;NA;0.316;Ochlodes sylvanus;0.996318754838625;  
MW499543;Lepidoptera;Aglais urticae;Aglais urticae;NA;Aglais urticae;0.986633121443958;  
MW499544;Lepidoptera;Erebia styx;NA;NA;Erebia styx;0.962664978932439;  
MW499545;Lepidoptera;Boloria napaea;Boloria napaea;0.001;Boloria napaea;0.875093643435076;  
MW499547;Lepidoptera;Agriades glandon;NA;NA;Agriades glandon;0.971007246731252;  
MW499551;Lepidoptera;Coenonympha gardetta;NA;0.001;NA;0.999999999999947;  
MW499553;Lepidoptera;Pyrgus armoricanus;Pyrgus armoricanus;1;Pyrgus armoricanus;0.997478680096412;  
MW499554;Lepidoptera;Lycaena phlaeas;Lycaena phlaeas;1;Lycaena phlaeas;0.999999996363186;  
MW499556;Lepidoptera;Boloria euphrosyne;Boloria euphrosyne;NA;Boloria euphrosyne;0.999929627170715;  
MW499559;Lepidoptera;Erebia pronoe;Erebia pronoe;1;Erebia pronoe;0.999567958198288;  
MW499560;Lepidoptera;Erebia stiria;NA;NA;Erebia styx;0.890739244956497;  
MW499561;Lepidoptera;Nymphalis io;NA;0.491;Aglais io;0.930153237246992;  
MW499562;Lepidoptera;Pyrgus andromedae;Pyrgus andromedae;0.001;Pyrgus andromedae;0.998828669843251;  
MW499563;Lepidoptera;Hipparchia fidia;Hipparchia fidia;1;Hipparchia fidia;0.999999999999943;  
MW499566;Lepidoptera;Plebejus argus;NA;0.328;Plebejus argus;0.969789734199889;  
MW499569;Lepidoptera;Lycaena virgaureae;NA;0.189;Lycaena virgaureae;0.999106286175071;  
MW499570;Lepidoptera;Lycaena tityrus;Lycaena tityrus;1;Lycaena tityrus;0.9999955667842;  
MW499571;Lepidoptera;Plebejus argyrognomon;NA;0.001;NA;0.990968563601775;  
MW499573;Lepidoptera;Araschnia levana;Araschnia levana;1;Araschnia levana;0.999999772187832;  
MW499574;Lepidoptera;Gonepteryx rhamni;NA;0.474;Gonepteryx rhamni;0.982076396127858;  
MW499575;Lepidoptera;Thymelicus lineola;Thymelicus lineola;1;Thymelicus lineola;0.999978121257105;  
MW499578;Lepidoptera;Maniola jurtina;NA;0.001;Maniola jurtina;0.939220105860875;  
MW499579;Lepidoptera;Boloria euphrosyne;Boloria euphrosyne;1;Boloria euphrosyne;0.999976943686819;  
MW499583;Lepidoptera;Satyrium ilicis;Satyrium ilicis;1;Satyrium ilicis;0.999999987901305;  
MW499587;Lepidoptera;Favonius quercus;NA;NA;Favonius quercus;0.73046069582187;

MW499588;Lepidoptera;Aricia agestis;NA;0.253;Aricia agestis;0.996350017387504;  
 MW499589;Lepidoptera;Colias palaeno;NA;0.002;NA;0.99999999983681;  
 MW499590;Lepidoptera;Scolitantides orion;Scolitantides orion;1;Scolitantides orion;0.99999984804305;  
 MW499591;Lepidoptera;Apatura ilia;NA;0.165;Apatura ilia;0.956796812031481;  
 MW499592;Lepidoptera;Fabriciana adippe;Fabriciana adippe;1;Fabriciana adippe;0.995947626017421;  
 MW499593;Lepidoptera;Aglaia urticae;NA;0.002;Aglaia urticae;0.987497593219019;  
 MW499595;Lepidoptera;Pyrgus serratulae;Pyrgus serratulae;1;Pyrgus serratulae;0.99999807446234;  
 MW499597;Lepidoptera;Nymphalis c-album;NA;0.215;NA;0.999999192918557;  
 MW499600;Lepidoptera;Melitaea varia;Melitaea varia;1;Melitaea varia;0.99998939515614;  
 MW499602;Lepidoptera;Pyrgus armoricanus;Pyrgus armoricanus;1;Pyrgus armoricanus;0.999997353848817;  
 MW499603;Lepidoptera;Ochlodes sylvanus;NA;0.316;Ochlodes sylvanus;0.996318754838625;  
 MW499605;Lepidoptera;Coenonympha pamphilus;Coenonympha pamphilus;1;Coenonympha pamphilus;0.99999999999744;  
 MW499607;Lepidoptera;Aporia crataegi;NA;NA;Aporia crataegi;0.999997266436607;  
 MW499609;Lepidoptera;Satyrium pruni;NA;0.076;Satyrium pruni;0.990322364021655;  
 MW499610;Lepidoptera;Colias alfacariensis;Colias alfacariensis;0.001;Colias alfacariensis;0.999926026317526;  
 MW499611;Lepidoptera;Araschnia levana;Araschnia levana;1;Araschnia levana;0.99999563582786;  
 MW499612;Lepidoptera;Lycaena thersamon;Lycaena thersamon;0.001;Lycaena thersamon;0.938000299157566;  
 MW499614;Lepidoptera;Melitaea didyma;Melitaea didyma;1;Melitaea didyma;0.999965766471529;  
 MW499615;Lepidoptera;Agriades optilete;Agriades optilete;1;Agriades optilete;0.99999977708058;  
 MW499619;Lepidoptera;Polyommatus thersites;NA;NA;Polyommatus thersites;0.99999041958266;  
 MW499621;Lepidoptera;Chazara briseis;NA;0.918;Chazara briseis;0.999965264690991;  
 MW499622;Lepidoptera;Boloria dia;Boloria dia;1;Boloria dia;0.99999999980503;  
 MW499624;Lepidoptera;Brenthis hecate;NA;0.01;Brenthis hecate;0.999836368537151;  
 MW499629;Lepidoptera;Satyrium w-album;NA;0.056;Satyrium w-album;0.989378230996316;  
 MW499630;Lepidoptera;Boloria euphrosyne;Boloria euphrosyne;1;Boloria euphrosyne;0.99998514406196;  
 MW499631;Lepidoptera;Plebejus idas;NA;0.007;NA;0.999546324331549;  
 MW499632;Lepidoptera;Argynnis paphia;Argynnis paphia;1;Argynnis paphia;0.99999991389927;  
 MW499633;Lepidoptera;Brenthis daphne;Brenthis daphne;0.001;Brenthis daphne;0.996209297077896;  
 MW499636;Lepidoptera;Polyommatus damon;Polyommatus damon;1;Polyommatus damon;0.99999910340482;  
 MW499641;Lepidoptera;Celastrina argiolus;Celastrina argiolus;1;Celastrina argiolus;0.999527385150531;  
 MW499642;Lepidoptera;Erebia oeme;NA;NA;Erebia oeme;0.99999998493848;  
 MW499643;Lepidoptera;Pyrgus armoricanus;Pyrgus armoricanus;1;Pyrgus armoricanus;0.997478680096412;  
 MW499646;Lepidoptera;Carcharodus alceae;Carcharodus alceae;0.999;Carcharodus alceae;0.99999996339511;  
 MW499648;Lepidoptera;Erebia ottomana;Erebia ottomana;1;Erebia ottomana;0.99999994283371;  
 MW499650;Lepidoptera;Aricia agestis;NA;0.253;Aricia agestis;0.996350017387504;  
 MW499651;Lepidoptera;Euphydryas maturna;NA;NA;NA;0.99999999996973;  
 MW499652;Lepidoptera;Coenonympha pamphilus;Coenonympha pamphilus;1;Coenonympha pamphilus;0.99999999999886;  
 MW499655;Lepidoptera;Celastrina argiolus;Celastrina argiolus;1;Celastrina argiolus;0.999708846309046;  
 MW499656;Lepidoptera;Pyrgus foulquieri;NA;0.002;Pyrgus alveus;0.711468812931747;  
 MW499657;Lepidoptera;Satyrium w-album;NA;0.056;Satyrium w-album;0.989378230996316;  
 MW499658;Lepidoptera;Brenthis ino;Brenthis ino;0.014;Brenthis ino;0.96213316348723;  
 MW499660;Lepidoptera;Aglaia urticae;NA;0.001;Aglaia urticae;0.98638944555779;  
 MW499661;Lepidoptera;Melitaea parthenoides;Melitaea parthenoides;1;Melitaea parthenoides;0.99999993530452;  
 MW499665;Lepidoptera;Coenonympha rhodopensis;NA;0.001;Coenonympha rhodopensis;0.897626687681828;  
 MW499666;Lepidoptera;Coenonympha arcania;NA;0.316;NA;0.99999999999985;  
 MW499667;Lepidoptera;Thymelicus lineola;Thymelicus lineola;1;Thymelicus lineola;0.99992254054079;  
 MW499670;Lepidoptera;Favonius quercus;NA;NA;Favonius quercus;0.73046069582187;  
 MW499673;Lepidoptera;Cupido minimus;NA;0.009;Cupido minimus;0.999791453712643;  
 MW499674;Lepidoptera;Cupido argiades;NA;0.499;NA;0.99999999984682;  
 MW499676;Lepidoptera;Polyommatus icarus;NA;0.002;Polyommatus icarus;0.997871588783533;  
 MW499677;Lepidoptera;Polyommatus icarus;NA;0.001;Polyommatus icarus;0.996159738993214;  
 MW499681;Lepidoptera;Erebia pronoe;Erebia pronoe;1;Erebia pronoe;0.999639549642344;  
 MW499683;Lepidoptera;Aricia eumedon;Eumedonia eumedon;0.031;Eumedonia eumedon;0.988312436606533;  
 MW499684;Lepidoptera;Euphydryas aurinia;NA;0.331;Euphydryas aurinia;0.980986237060793;  
 MW499686;Lepidoptera;Thymelicus lineola;Thymelicus lineola;1;Thymelicus lineola;0.99994462912268;  
 MW499689;Lepidoptera;Hipparchia fagi;NA;NA;Hipparchia fagi;0.894416013924449;  
 MW499690;Lepidoptera;Anthocharis cardamines;Anthocharis cardamines;1;Anthocharis cardamines;0.999999940675226;  
 MW499693;Lepidoptera;Pyrgus warrenensis;NA;0.003;NA;0.99999999997732;  
 MW499694;Lepidoptera;Cupido alcetas;NA;0.218;Cupido alcetas;0.833501983138177;  
 MW499696;Lepidoptera;Aricia artaxerxes;NA;0.394;Aricia artaxerxes;0.999502890976379;  
 MW499697;Lepidoptera;Coenonympha arcania;NA;0.062;Coenonympha arcania;0.984995921079476;  
 MW499698;Lepidoptera;Melitaea parthenoides;Melitaea parthenoides;1;Melitaea parthenoides;0.999999991586293;

MW499699;Lepidoptera;Maniola jurtina;NA;0.038;NA;0.99999999999524;  
MW499700;Lepidoptera;Pyrgus foulquieri;NA;NA;Pyrgus alveus;0.827119616974978;  
MW499703;Lepidoptera;Aricia artaxerxes;NA;0.394;Aricia artaxerxes;0.999502890976379;  
MW499707;Lepidoptera;Apatura ilia;NA;0.039;Apatura ilia;0.977274423026401;  
MW499708;Lepidoptera;Erebia christi;Erebia christi;1;Erebia christi;0.99999999983089;  
MW499710;Lepidoptera;Pieris napi;NA;0.028;Pieris napi;0.888205720664699;  
MW499711;Lepidoptera;Coenonympha arcania;NA;0.067;Coenonympha arcania;0.978811371852141;  
MW499712;Lepidoptera;Cupido osiris;Cupido osiris;1;Cupido osiris;0.999998710927265;  
MW499714;Lepidoptera;Glaucopsyche alexis;Glaucopsyche alexis;0.001;Glaucopsyche alexis;0.94042380088325;  
MW499715;Lepidoptera;Coenonympha pamphilus;Coenonympha pamphilus;1;Coenonympha pamphilus;0.99999999999744;  
MW499718;Lepidoptera;Lycaena tityrus;Lycaena tityrus;1;Lycaena tityrus;0.999995729087172;  
MW499720;Lepidoptera;Plebejus argyrognomon;NA;0.001;NA;0.998518811781132;  
MW499721;Lepidoptera;Lycaena tityrus;Lycaena tityrus;1;Lycaena tityrus;0.999998928238034;  
MW499723;Lepidoptera;Gegenes pumilio;NA;0.051;Gegenes pumilio;0.999825034556942;  
MW499724;Lepidoptera;Boloria dia;Boloria dia;1;Boloria dia;0.99999999980503;  
MW499725;Lepidoptera;Erebia pharte;Erebia pharte;1;Erebia pharte;0.9999999630495;  
MW499729;Lepidoptera;Hipparchia semele;NA;0.002;Hipparchia semele;0.784603069619426;  
MW499730;Lepidoptera;Euphydryas aurinia;NA;0.001;Euphydryas aurinia;0.995576749826865;  
MW499736;Lepidoptera;Hipparchia hermione;NA;NA;NA;0.99999999999991;  
MW499737;Lepidoptera;Agriades orbitulus;NA;0.01;Agriades orbitulus;0.998991302227708;  
MW499738;Lepidoptera;Arethusana arethusana;Arethusana arethusana;1;Arethusana arethusana;0.999999787144355;  
MW499741;Lepidoptera;Lycaena tityrus;Lycaena tityrus;1;Lycaena tityrus;0.999998928238034;  
MW499742;Lepidoptera;Boloria euphrosyne;Boloria euphrosyne;1;Boloria euphrosyne;0.999998276608842;  
MW499744;Lepidoptera;Polyommatus icarus;NA;0.13;Polyommatus icarus;0.979762695748748;  
MW499746;Lepidoptera;Lycaena tityrus;Lycaena tityrus;1;Lycaena tityrus;0.999995729087172;  
MW499748;Lepidoptera;Thymelicus sylvestris;NA;0.131;Thymelicus sylvestris;0.999961574491035;  
MW499751;Lepidoptera;Lycaena tityrus;Lycaena tityrus;1;Lycaena tityrus;0.999974047546831;  
MW499752;Lepidoptera;Lycaena virgaureae;NA;0.175;Lycaena virgaureae;0.999432281538511;  
MW499757;Lepidoptera;Anthocharis cardamines;Anthocharis cardamines;1;Anthocharis cardamines;0.99999954337029;  
MW499758;Lepidoptera;Pyrgus malvoides;NA;0.068;Pyrgus malvoides;0.9357596949685;  
MW499760;Lepidoptera;Nymphalis c-album;NA;0.215;NA;0.999999192918557;  
MW499762;Lepidoptera;Carcharodus alceae;Carcharodus alceae;0.003;Carcharodus alceae;0.99999959808407;  
MW499763;Lepidoptera;Thymelicus acteon;Thymelicus acteon;1;Thymelicus acteon;0.9999999752248;  
MW499766;Lepidoptera;Pyrgus cacaliae;Pyrgus cacaliae;0.001;Pyrgus cacaliae;0.986004413030866;  
MW499767;Lepidoptera;Erebia pluto;Erebia pluto;1;Erebia pluto;0.99999977588772;  
MW499769;Lepidoptera;Melanargia galathea;Melanargia galathea;NA;Melanargia galathea;0.970417110336134;  
MW499771;Lepidoptera;Argynnis aglaja;NA;0.001;NA;0.99999999999586;  
MW499774;Lepidoptera;Plebejus idas;NA;0.007;NA;0.999546324331549;  
MW499775;Lepidoptera;Fabriciana niobe;NA;0.001;Fabriciana niobe;0.989214650993052;  
MW499778;Lepidoptera;Lasiommata maera;Lasiommata maera;1;Lasiommata maera;0.99999264679375;  
MW499779;Lepidoptera;Argynnis paphia;Argynnis paphia;1;Argynnis paphia;0.99999991389927;  
MW499782;Lepidoptera;Polyommatus icarus;NA;0.004;Polyommatus icarus;0.996356927062773;  
MW499784;Lepidoptera;Coenonympha arcania;NA;0.001;NA;0.99999999999975;  
MW499785;Lepidoptera;Pyrgus carthami;Pyrgus carthami;1;Pyrgus carthami;0.999994013597656;  
MW499787;Lepidoptera;Hamearis lucina;NA;NA;Hamearis lucina;0.99999999984141;  
MW499790;Lepidoptera;Erebia pronoe;Erebia pronoe;0.001;Erebia pronoe;0.999412757816713;  
MW499791;Lepidoptera;Aricia cramera;Aricia cramera;1;Aricia cramera;0.999990014848976;  
MW499792;Lepidoptera;Coenonympha rhodopensis;NA;0.001;Coenonympha rhodopensis;0.739676467143747;  
MW499793;Lepidoptera;Pyrgus andromedae;Pyrgus andromedae;0.001;Pyrgus andromedae;0.998828669843251;  
MW499795;Lepidoptera;Fabriciana adippe;NA;NA;Fabriciana adippe;0.900255826442102;  
MW499797;Lepidoptera;Coenonympha oedippus;Coenonympha oedippus;1;Coenonympha oedippus;0.999999999999972;  
MW499799;Lepidoptera;Hipparchia semele;NA;0.002;Hipparchia semele;0.784603069619426;  
MW499800;Lepidoptera;Plebejus argyrognomon;NA;0.001;NA;0.999938863896795;  
MW499803;Lepidoptera;Argynnis aglaja;NA;NA;Speyeria aglaja;0.872991147917853;  
MW499807;Lepidoptera;Gegenes nostrodamus;Gegenes nostrodamus;1;Gegenes nostrodamus;0.999999904741718;  
MW499808;Lepidoptera;Polyommatus amandus;Polyommatus amandus;0.03;Polyommatus amandus;0.99992197531069;  
MW499810;Lepidoptera;Pieris napi;NA;NA;NA;100.000.000.000.001;  
MW499811;Lepidoptera;Brenthis ino;Brenthis ino;0.998;Brenthis ino;0.995325118916732;  
MW499812;Lepidoptera;Aricia agestis;NA;0.253;Aricia agestis;0.996350017387504;  
MW499813;Lepidoptera;Parnassius apollo;Parnassius apollo;1;Parnassius apollo;0.992704703916692;  
MW499814;Lepidoptera;Polyommatus icarus;NA;0.001;Polyommatus icarus;0.96905816849887;  
MW499816;Lepidoptera;Aricia agestis;NA;0.253;Aricia agestis;0.996350017387504;  
MW499817;Lepidoptera;Brintesia circe;Brintesia circe;1;Brintesia circe;0.999998746292154;  
MW499819;Lepidoptera;Pyrgus cacaliae;Pyrgus cacaliae;0.001;Pyrgus cacaliae;0.997779968725098;  
MW499820;Lepidoptera;Boloria euphrosyne;Boloria euphrosyne;0.008;Boloria euphrosyne;0.999964281413411;

MW499823;Lepidoptera;Colias alfacariensis;Colias alfacariensis;0.001;Colias alfacariensis;0.999926026317526;  
MW499824;Lepidoptera;Argynnis aglaja;NA;NA;Speyeria aglaja;0.833799544278895;  
MW499829;Lepidoptera;Nymphalis io;NA;0.181;Aglais io;0.960115164047212;  
MW499830;Lepidoptera;Melitaea didyma;Melitaea didyma;0.999;Melitaea didyma;0.997128400734812;  
MW499831;Lepidoptera;Aphantopus hyperantus;Aphantopus hyperantus;0.006;Aphantopus hyperantus;0.99998615504572;  
MW499834;Lepidoptera;Thymelicus sylvestris;NA;0.324;Thymelicus sylvestris;0.999940778442454;  
MW499835;Lepidoptera;Melitaea britomartis;NA;NA;Melitaea britomartis;0.965147943123453;  
MW499836;Lepidoptera;Polyommatus amandus;Polyommatus amandus;0.003;Polyommatus amandus;0.999980071833264;  
MW499837;Lepidoptera;Cupido osiris;Cupido osiris;0.001;Cupido osiris;0.99999920729954;  
MW499838;Lepidoptera;Euphydryas aurinia;NA;0.106;Euphydryas aurinia;0.993939072040577;  
MW499839;Lepidoptera;Melitaea cinxia;Melitaea cinxia;1;Melitaea cinxia;0.99999999999403;  
MW499840;Lepidoptera;Carcharodus alceae;Carcharodus alceae;0.999;Carcharodus alceae;0.99999998008462;  
MW499845;Lepidoptera;Pyrgus warrenensis;NA;0.001;NA;0.999999999994853;  
MW499847;Lepidoptera;Anthocharis cardamines;Anthocharis cardamines;1;Anthocharis cardamines;0.999999904052946;  
MW499848;Lepidoptera;Thymelicus lineola;Thymelicus lineola;1;Thymelicus lineola;0.999986151516079;  
MW499851;Lepidoptera;Thecla betulae;Thecla betulae;1;Thecla betulae;0.99999999972886;  
MW499852;Lepidoptera;Brenthis daphne;Brenthis daphne;0.001;Brenthis daphne;0.996209297077896;  
MW499855;Lepidoptera;Erebia mnestræ;Erebia mnestræ;0.002;Erebia mnestræ;0.999916977821046;  
MW499856;Lepidoptera;Ochlodes sylvanus;NA;0.316;Ochlodes sylvanus;0.996318754838625;  
MW499859;Lepidoptera;Boloria dia;Boloria dia;1;Boloria dia;0.99999999978769;  
MW499865;Lepidoptera;Coenonympha arcania;NA;0.057;Coenonympha arcania;0.983992716466119;  
MW499866;Lepidoptera;Maniola jurtina;NA;NA;NA;0.99999999988982;  
MW499869;Lepidoptera;Lycaena tityrus;Lycaena tityrus;1;Lycaena tityrus;0.99998928238034;  
MW499871;Lepidoptera;Fabriciana adippe;NA;NA;Fabriciana adippe;0.860015034518486;  
MW499873;Lepidoptera;Chazara briseis;Chazara briseis;1;Chazara briseis;0.99998731644229;  
MW499874;Lepidoptera;Parnassius apollo;Parnassius apollo;1;Parnassius apollo;0.992704703916692;  
MW499879;Lepidoptera;Boloria selene;NA;0.109;Boloria selene;0.999997425298705;  
MW499880;Lepidoptera;Boloria napaea;Boloria napaea;0.998;Boloria napaea;0.992375229346674;  
MW499882;Lepidoptera;Polyommatus escheri;Polyommatus escheri;1;Polyommatus escheri;0.999999122411013;  
MW499884;Lepidoptera;Cupido minimus;NA;0.006;Cupido minimus;0.999768371759258;  
MW499885;Lepidoptera;Aricia cramera;Aricia cramera;0.001;Aricia cramera;0.99992989709234;  
MW499887;Lepidoptera;Erebia tyndarus;NA;NA;NA;0.99999999999923;  
MW499888;Lepidoptera;Pyrgus malvae;Pyrgus malvae;NA;NA;NA;0.980121140374433;  
MW499889;Lepidoptera;Colias crocea;NA;0.059;NA;0.99999999999738;  
MW499890;Lepidoptera;Hipparchia fagi;NA;NA;Hipparchia fagi;0.960942485014654;  
MW499893;Lepidoptera;Boloria euphrosyne;Boloria euphrosyne;1;Boloria euphrosyne;0.999989902710144;  
MW499895;Lepidoptera;Polyommatus dorylas;Polyommatus dorylas;0.008;Polyommatus dorylas;0.991281865899703;  
MW499896;Lepidoptera;Celastrina argiolus;Celastrina argiolus;1;Celastrina argiolus;0.999527385150531;  
MW499897;Lepidoptera;Brintesia circe;Brintesia circe;NA;Brintesia circe;0.999999592702691;  
MW499899;Lepidoptera;Melitaea didyma;Melitaea didyma;1;Melitaea didyma;0.999553096668424;  
MW499900;Lepidoptera;Hipparchia hermione;Hipparchia hermione;1;Hipparchia hermione;0.999924496000703;  
MW499902;Lepidoptera;Cyaniris semiargus;NA;NA;Cyaniris semiargus;0.999051841766953;  
MW499903;Lepidoptera;Plebejus argus;NA;0.176;Plebejus argus;0.972248473529898;  
MW499908;Lepidoptera;Brintesia circe;Brintesia circe;1;Brintesia circe;0.999999822172372;  
MW499909;Lepidoptera;Agriades optilete;Agriades optilete;1;Agriades optilete;0.999999984634258;  
MW499911;Lepidoptera;Agriades optilete;Agriades optilete;1;Agriades optilete;0.999999979754364;  
MW499912;Lepidoptera;Argynnis aglaja;NA;NA;NA;0.999999999999133;  
MW499915;Lepidoptera;Boloria napaea;Boloria napaea;0.001;Boloria napaea;0.997027236954096;  
MW499916;Lepidoptera;Erebia tyndarus;NA;NA;NA;0.999999999999879;  
MW499917;Lepidoptera;Carcharodus lavatherae;NA;0.108;Carcharodus lavatherae;0.998640865248065;  
MW499918;Lepidoptera;Polyommatus escheri;Polyommatus escheri;1;Polyommatus escheri;0.999999991378331;  
MW499921;Lepidoptera;Boloria graeca;Boloria graeca;1;Boloria graeca;0.999999912715485;  
MW499922;Lepidoptera;Plebejus argus;NA;0.112;Plebejus argus;0.964043871125174;  
MW499923;Lepidoptera;Argynnis aglaja;NA;NA;Speyeria aglaja;0.843076899936409;  
MW499924;Lepidoptera;Pyrgus andromedae;Pyrgus andromedae;0.001;Pyrgus andromedae;0.998828669843251;  
MW499926;Lepidoptera;Melitaea nevadensis;NA;0.002;NA;0.999999999925082;  
MW499927;Lepidoptera;Erebia mnestræ;Erebia mnestræ;0.002;Erebia mnestræ;0.999854182023311;  
MW499928;Lepidoptera;Gonepteryx rhamni;NA;0.474;Gonepteryx rhamni;0.982076396127858;  
MW499930;Lepidoptera;Erebia medusa;NA;0.009;Erebia medusa;0.986275612856827;  
MW499931;Lepidoptera;Euphydryas aurinia;NA;0.001;Euphydryas aurinia;0.992699215120061;  
MW499934;Lepidoptera;Erebia pronoe;Erebia pronoe;1;Erebia pronoe;0.999223825572769;  
MW499935;Lepidoptera;Anthocharis cardamines;Anthocharis cardamines;1;Anthocharis cardamines;0.999999940675226;  
MW499936;Lepidoptera;Cyaniris semiargus;NA;NA;Cyaniris semiargus;0.99903926220317;

MW499938;Lepidoptera;Thymelicus lineola;Thymelicus lineola;1;Thymelicus lineola;0.999971535093703;

MW499941;Lepidoptera;Pyrgus sidae;Pyrgus sidae;0.002;Pyrgus sidae;0.99990045912829;

MW499943;Lepidoptera;Maniola jurtina;NA;NA;NA;0.9999999988982;

MW499944;Lepidoptera;Erynnis tages;Erynnis tages;1;Erynnis tages;0.999999620985748;

MW499947;Lepidoptera;Argynnis paphia;Argynnis paphia;1;Argynnis paphia;0.99999991389927;

MW499948;Lepidoptera;Nymphalis egea;Polygonia egea;1;Polygonia egea;0.99999878357791;

MW499950;Lepidoptera;Oeneis glacialis;Oeneis glacialis;0.003;Oeneis glacialis;0.981039562032588;

MW499951;Lepidoptera;Boloria euphrosyne;Boloria euphrosyne;0.001;Boloria euphrosyne;0.999985640170951;

MW499952;Lepidoptera;Coenonympha rhodopensis;Coenonympha rhodopensis;0.01;Coenonympha rhodopensis;0.912323431995304;

MW499957;Lepidoptera;Nymphalis io;NA;0.491;Aglais io;0.930153237246992;

MW499967;Lepidoptera;Coenonympha arcania;NA;0.052;Coenonympha arcania;0.979199900742577;

MW499971;Lepidoptera;Lycaena tityrus;Lycaena tityrus;1;Lycaena tityrus;0.999998928238034;

MW499973;Lepidoptera;Lycaena tityrus;Lycaena tityrus;1;Lycaena tityrus;0.999997027007808;

MW499975;Lepidoptera;Aricia agestis;NA;0.001;Aricia agestis;0.992166764473385;

MW499977;Lepidoptera;Aricia artaxerxes;Plebejus argus;1;Aricia artaxerxes;0.999743187199922;

MW499978;Lepidoptera;Coenonympha arcania;NA;0.002;NA;0.99999999999958;

MW499981;Lepidoptera;Cupido alcetas;NA;0.001;Cupido alcetas;0.816686875782571;

MW499982;Lepidoptera;Euphydryas aurinia;NA;0.106;Euphydryas aurinia;0.993939072040577;

MW499983;Lepidoptera;Favonius quercus;NA;NA;NA;0.999999999998295;

MW499985;Lepidoptera;Polyommatus thersites;NA;0.262;Polyommatus thersites;0.999999404475893;

MW499986;Lepidoptera;Erebia ottomana;Erebia ottomana;1;Erebia ottomana;0.999999994283371;

MW499987;Lepidoptera;Plebejus idas;NA;0.001;NA;0.998518811781132;

MW499988;Lepidoptera;Polyommatus eros;NA;0.001;Polyommatus eros;0.863598753993334;

MW499990;Lepidoptera;Pyrgus malvoides;NA;0.07;Pyrgus malvoides;0.924411665446886;

MW499992;Lepidoptera;Polyommatus amandus;Polyommatus amandus;0.003;Polyommatus amandus;0.999980071833264;

MW499993;Lepidoptera;Lycaena virgaureae;NA;0.186;Lycaena virgaureae;0.999491227342155;

MW499995;Lepidoptera;Carterocephalus palaemon;NA;0.052;Carterocephalus palaemon;0.728445051795325;

MW499997;Lepidoptera;Erynnis tages;Erynnis tages;1;Erynnis tages;0.999999281987018;

MW499998;Lepidoptera;Hipparchia statilinus;Hipparchia statilinus;1;Hipparchia statilinus;0.999999999999915;

MW500000;Lepidoptera;Boloria selene;NA;0.098;Boloria selene;0.999999661291981;

MW500001;Lepidoptera;Cupido osiris;Cupido osiris;1;Cupido osiris;0.999962698770249;

MW500002;Lepidoptera;Phengaris teleius;NA;0.498;Phengaris teleius;0.707377020793528;

MW500004;Lepidoptera;Euphydryas aurinia;NA;0.118;Euphydryas aurinia;0.995366309208913;

MW500005;Lepidoptera;Erebia medusa;NA;0.034;Erebia medusa;0.989870112589682;

MW500009;Lepidoptera;Pyrgus armoricanus;Pyrgus armoricanus;1;Pyrgus armoricanus;0.997478680096412;

MW500011;Lepidoptera;Vanessa cardui;Vanessa cardui;1;Vanessa cardui;0.999999803450484;

MW500012;Lepidoptera;Polyommatus eros;NA;0.005;Polyommatus eros;0.962873614249808;

MW500016;Lepidoptera;Boloria euphrosyne;Boloria euphrosyne;1;Boloria euphrosyne;0.999988204772551;

MW500017;Lepidoptera;Cyaniris semiargus;NA;NA;Cyaniris semiargus;0.998462065240233;

MW500018;Lepidoptera;Polyommatus damon;Polyommatus damon;1;Polyommatus damon;0.999999721256341;

MW500020;Lepidoptera;Cyaniris semiargus;NA;NA;Cyaniris semiargus;0.999051841766953;

MW500021;Lepidoptera;Plebejus idas;NA;0.001;NA;0.999621816578781;

MW500022;Lepidoptera;Vanessa atalanta;Vanessa atalanta;1;Vanessa atalanta;0.99999999885944;

MW500026;Lepidoptera;Euphydryas aurinia;NA;0.001;Euphydryas aurinia;0.995576749826865;

MW500027;Lepidoptera;Favonius quercus;NA;NA;NA;0.999999999998199;

MW500028;Lepidoptera;Boloria titania;Boloria titania;1;Boloria titania;0.999860471216678;

MW500030;Lepidoptera;Pararge aegeria;Pararge aegeria;1;Pararge aegeria;0.99999999963165;

MW500033;Lepidoptera;Carcharodus alceae;Carcharodus alceae;NA;Carcharodus alceae;0.999998131544272;

MW500035;Lepidoptera;Satyrium pruni;NA;0.076;Satyrium pruni;0.990322364021655;

MW500037;Lepidoptera;Melitaea didyma;Melitaea didyma;1;Melitaea didyma;0.994281215815027;

MW500038;Lepidoptera;Polyommatus escheri;Polyommatus escheri;1;Polyommatus escheri;0.999999968891729;

MW500039;Lepidoptera;Pyrgus alveus;NA;0.001;Pyrgus alveus;0.952759347744159;

MW500041;Lepidoptera;Argynnis aglaja;NA;NA;Speyeria aglaja;0.872991147917853;

MW500044;Lepidoptera;Brenthis ino;Brenthis ino;1;Brenthis ino;0.999306366942236;

MW500045;Lepidoptera;Polyommatus daphnis;NA;0.062;Polyommatus daphnis;0.995724017767077;

MW500046;Lepidoptera;Satyrium ilicis;Satyrium ilicis;1;Satyrium ilicis;0.99999888438032;

MW500047;Lepidoptera;Pyrgus warrenensis;NA;NA;NA;0.999999999995618;

MW500048;Lepidoptera;Pyrgus carthami;Pyrgus carthami;1;Pyrgus carthami;0.99999339129648;

MW500049;Lepidoptera;Euphydryas aurinia;NA;0.001;Euphydryas aurinia;0.990967267261567;

MW500050;Lepidoptera;Thymelicus sylvestris;NA;0.131;Thymelicus sylvestris;0.999961574491035;

MW500051;Lepidoptera;Euphydryas aurinia;NA;0.125;Euphydryas aurinia;0.99016799090659;

MW500052;Lepidoptera;Melitaea nevadensis;NA;NA;NA;0.999999999828008;

MW500053;Lepidoptera;Polyommatus icarus;NA;0.001;Polyommatus icarus;0.974455446201716;

MW500055;Lepidoptera;Pyrgus warrenensis;NA;0.003;NA;0.99999999997732;

MW500056;Lepidoptera;Anthocharis cardamines;Anthocharis cardamines;1;Anthocharis cardamines;0.999999940675226;

MW500058;Lepidoptera;Satyrium spini;Satyrium spini;1;Satyrium spini;0.999999711809336;

MW500059;Lepidoptera;Plebejus argus;NA;0.328;Plebejus argus;0.969789734199889;

MW500060;Lepidoptera;Cercyonis lupina;Hyponephele lupina;1;Hyponephele lupina;0.999999675500187;  
MW500061;Lepidoptera;Carterocephalus palaemon;NA;0.052;Carterocephalus  
palaemon;0.728445051795325;  
MW500063;Lepidoptera;Cyaniris semiargus;NA;NA;Cyaniris semiargus;0.999299367533383;  
MW500065;Lepidoptera;Maniola jurtina;NA;0.038;NA;0.99999999999524;  
MW500068;Lepidoptera;Celastrina argiolus;Celastrina argiolus;1;Celastrina  
argiolus;0.999527385150531;  
MW500069;Lepidoptera;Fabriciana adippe;Fabriciana adippe;NA;Fabriciana adippe;0.714575969098363;  
MW500070;Lepidoptera;Plebejus argus;NA;NA;Plebejus argus;0.847051373844053;  
MW500074;Lepidoptera;Erebia euryale;NA;NA;Erebia euryale;0.907478661508288;  
MW500078;Lepidoptera;Boloria napaea;Boloria napaea;0.001;Boloria napaea;0.990840805792536;  
MW500079;Lepidoptera;Polyommatus thersites;NA;NA;Polyommatus thersites;0.999999041958266;  
MW500080;Lepidoptera;Scolitantides orion;Scolitantides orion;1;Scolitantides  
orion;0.99999981949031;  
MW500081;Lepidoptera;Brenthis daphne;Brenthis daphne;0.01;Brenthis daphne;0.972718578281372;  
MW500082;Lepidoptera;Ochlodes sylvanus;NA;0.316;Ochlodes sylvanus;0.996318754838625;  
MW500084;Lepidoptera;Pyrgus alveus;NA;0.002;Pyrgus alveus;0.870345790667288;  
MW500085;Lepidoptera;Celastrina argiolus;Celastrina argiolus;1;Celastrina  
argiolus;0.999631157817044;  
MW500088;Lepidoptera;Callophrys rubi;NA;0.002;Callophrys rubi;0.998841790162773;  
MW500090;Lepidoptera;Plebejus idas;NA;0.007;NA;0.999546324331549;  
MW500093;Lepidoptera;Erebia epiphron;Erebia epiphron;NA;Erebia epiphron;0.998243429957028;  
MW500095;Lepidoptera;Gonepteryx rhamni;NA;0.192;Gonepteryx rhamni;0.991002175992451;  
MW500096;Lepidoptera;Erebia medusa;NA;0.009;Erebia medusa;0.986275612856827;  
MW500098;Lepidoptera;Hipparchia semele;NA;0.001;Hipparchia semele;0.709218943047224;  
MW500099;Lepidoptera;Melitaea diamina;NA;0.151;Melitaea diamina;0.99999962052926;  
MW500101;Lepidoptera;Polyommatus dorylas;Polyommatus dorylas;0.008;Polyommatus  
dorylas;0.991651784169474;  
MW500102;Lepidoptera;Gonepteryx rhamni;NA;0.474;Gonepteryx rhamni;0.982076396127858;  
MW500103;Lepidoptera;Pieris napi;NA;NA;Pieris napi;0.923653340877371;  
MW500106;Lepidoptera;Pyrgus cacaliae;Pyrgus cacaliae;0.001;Pyrgus cacaliae;0.997779968725098;  
MW500107;Lepidoptera;Thymelicus acteon;Thymelicus acteon;1;Thymelicus acteon;0.99999996401357;  
MW500109;Lepidoptera;Cupido argiades;NA;0.499;NA;0.99999999984682;  
MW500110;Lepidoptera;Erebia euryale;NA;NA;Erebia euryale;0.907478661508288;  
MW500111;Lepidoptera;Pyrgus cacaliae;Pyrgus cacaliae;0.001;Pyrgus cacaliae;0.997779968725098;  
MW500112;Lepidoptera;Polyommatus eros;NA;0.005;Polyommatus eros;0.95275169203039;  
MW500113;Lepidoptera;Melitaea nevadensis;NA;0.001;NA;0.99999999360078;  
MW500114;Lepidoptera;Aglais urticae;Aglais urticae;0.001;Aglais urticae;0.990690600684087;  
MW500115;Lepidoptera;Erebia ottomana;Erebia ottomana;1;Erebia ottomana;0.99999991465188;  
MW500117;Lepidoptera;Thecla betulae;Thecla betulae;1;Thecla betulae;0.99999999972886;  
MW500118;Lepidoptera;Polyommatus daphnis;NA;0.031;Polyommatus daphnis;0.990898693521463;  
MW500119;Lepidoptera;Brenthis ino;Brenthis ino;0.007;Brenthis ino;0.977157381961834;  
MW500122;Lepidoptera;Aricia artaxerxes;NA;0.001;Aricia artaxerxes;0.998546425606378;  
MW500123;Lepidoptera;Euphydryas cynthia;Euphydryas cynthia;1;Euphydryas  
cynthia;0.99999999705039;  
MW500124;Lepidoptera;Pieris napi;NA;0.008;Pieris napi;0.840314219469586;  
MW500125;Lepidoptera;Pyrgus malvae;NA;NA;Pyrgus malvae;0.99117121647847;  
MW500127;Lepidoptera;Lycaena phlaeas;Lycaena phlaeas;1;Lycaena phlaeas;0.999999996363186;  
MW500128;Lepidoptera;Hipparchia fagi;NA;NA;Hipparchia fagi;0.887021085760257;  
MW500129;Lepidoptera;Plebejus argyrognomon;NA;0.001;NA;0.994620093546684;  
MW500130;Lepidoptera;Erebia christi;Erebia christi;1;Erebia christi;0.99999999983089;  
MW500132;Lepidoptera;Polyommatus icarus;NA;0.13;Polyommatus icarus;0.979762695748748;  
MW500133;Lepidoptera;Thymelicus lineola;Thymelicus lineola;1;Thymelicus  
lineola;0.999982844978955;  
MW500135;Lepidoptera;Anthocharis cardamines;Anthocharis cardamines;1;Anthocharis  
cardamines;0.999999871062621;  
MW500140;Lepidoptera;Euphydryas maturna;NA;NA;NA;0.99999999996973;  
MW500141;Lepidoptera;Satyrium spini;Satyrium spini;1;Satyrium spini;0.999996032781578;  
MW500143;Lepidoptera;Coenonympha glycerion;NA;0.295;Coenonympha glycerion;0.999998958157621;  
MW500144;Lepidoptera;Aporia crataegi;NA;NA;Aporia crataegi;0.999997860566808;  
MW500145;Lepidoptera;Erebia meolans;NA;NA;Erebia meolans;0.999558897580846;  
MW500146;Lepidoptera;Coenonympha glycerion;NA;0.28;Coenonympha glycerion;0.999998036263913;  
MW500147;Lepidoptera;Minois dryas;NA;0.035;Minois dryas;0.817980558879622;  
MW500148;Lepidoptera;Vanessa cardui;Vanessa cardui;1;Vanessa cardui;0.999999459983318;  
MW500150;Lepidoptera;Melanargia galathea;Melanargia galathea;NA;Melanargia  
galathea;0.981855578470499;  
MW500152;Lepidoptera;Coenonympha gardetta;NA;0.001;Coenonympha gardetta;0.731095812176462;  
MW500153;Lepidoptera;Lasiommata petropolitana;Lasiommata petropolitana;1;Lasiommata  
petropolitana;0.99999894617524;  
MW500155;Lepidoptera;Lycaena virgaureae;NA;0.186;Lycaena virgaureae;0.999491227342155;  
MW500157;Lepidoptera;Erebia euryale;NA;NA;Erebia euryale;0.93493911427573;  
MW500159;Lepidoptera;Hipparchia semele;NA;0.001;Hipparchia semele;0.709218943047224;  
MW500161;Lepidoptera;Apatura iris;Apatura iris;1;Apatura iris;0.99999999999972;  
MW500163;Lepidoptera;Gonepteryx rhamni;NA;0.498;Gonepteryx rhamni;0.98690378171839;  
MW500164;Lepidoptera;Nymphalis egea;Polygonia egea;1;Polygonia egea;0.99999878357791;  
MW500166;Lepidoptera;Plebejus idas;NA;0.002;NA;0.998900415846545;  
MW500167;Lepidoptera;Euphydryas aurinia;NA;0.31;Euphydryas aurinia;0.993387708761386;  
MW500168;Lepidoptera;Polyommatus thersites;NA;NA;Polyommatus thersites;0.999999041958266;



MW500169;Lepidoptera;Cupido osiris;Cupido osiris;1;Cupido osiris;0.999999791352473;  
MW500170;Lepidoptera;Erynnis tages;Erynnis tages;1;Erynnis tages;0.999999281987018;  
MW500172;Lepidoptera;Lycaena hippothoe;Lycaena hippothoe;NA;Lycaena hippothoe;0.929815071946357;  
MW500174;Lepidoptera;Erebia pluto;Erebia pluto;1;Erebia pluto;0.99999977588772;  
MW500176;Lepidoptera;Carcharodus alceae;Carcharodus alceae;1;Carcharodus  
alceae;0.99999998465938;  
MW500177;Lepidoptera;Hipparchia aristaeus;NA;0.001;Hipparchia semele;0.853913503436074;  
MW500179;Lepidoptera;Lycaena virgaureae;NA;0.186;Lycaena virgaureae;0.999491227342155;  
MW500180;Lepidoptera;Agriades optilete;Agriades optilete;1;Agriades optilete;0.999999991481502;  
MW500181;Lepidoptera;Hipparchia semele;NA;0.007;Hipparchia semele;0.716845822980136;  
MW500183;Lepidoptera;Polyommatus amandus;Polyommatus amandus;0.003;Polyommatus  
amandus;0.999980071833264;  
MW500185;Lepidoptera;Favonius quercus;NA;NA;NA;0.99999999998855;  
MW500189;Lepidoptera;Boloria titania;Boloria titania;0.001;Boloria titania;0.99983358374111;  
MW500191;Lepidoptera;Melitaea nevadensis;NA;0.001;Melitaea celadussa;0.99253720572842;  
MW500196;Lepidoptera;Thymelicus acteon;Thymelicus acteon;1;Thymelicus acteon;0.99999996401357;  
MW500199;Lepidoptera;Euphydryas maturna;NA;NA;NA;0.99999999996973;  
MW500201;Lepidoptera;Melitaea nevadensis;NA;NA;NA;0.99999999828008;  
MW500202;Lepidoptera;Cupido osiris;Cupido osiris;1;Cupido osiris;0.99998705912715;  
MW500206;Lepidoptera;Nymphalis c-album;NA;0.215;NA;0.999999192918557;  
MW500207;Lepidoptera;Hipparchia semele;NA;0.001;Hipparchia semele;0.832088815648694;  
MW500208;Lepidoptera;Boloria dia;Boloria dia;1;Boloria dia;0.99999999980503;  
MW500211;Lepidoptera;Coenonympha gardetta;NA;0.12;NA;0.99999999999993;  
MW500214;Lepidoptera;Nymphalis c-album;NA;0.215;NA;0.999999192918557;  
MW500216;Lepidoptera;Anthocharis cardamines;Anthocharis cardamines;1;Anthocharis  
cardamines;0.999999985396329;  
MW500217;Lepidoptera;Aphantopus hyperantus;Aphantopus hyperantus;0.994;Aphantopus  
hyperantus;0.999999434790244;  
MW500218;Lepidoptera;Thymelicus acteon;Thymelicus acteon;1;Thymelicus acteon;0.99999999760044;  
MW500219;Lepidoptera;Melitaea didyma;Melitaea didyma;1;Melitaea didyma;0.999872151802141;  
MW500220;Lepidoptera;Pyrgus alveus;NA;0.003;NA;0.99999999997732;  
MW500221;Lepidoptera;Pyrgus warrenensis;NA;0.003;Pyrgus warrenensis;0.803805151185037;  
MW500222;Lepidoptera;Cupido alcetas;NA;0.218;Cupido alcetas;0.833501983138177;  
MW500223;Lepidoptera;Carcharodus alceae;Carcharodus alceae;NA;Carcharodus  
alceae;0.999998131544272;  
MW500225;Lepidoptera;Aricia agestis;NA;0.222;Aricia agestis;0.99154965672158;  
MW500228;Lepidoptera;Colias phicomone;NA;0.001;Colias phicomone;0.985598879697681;  
MW500229;Lepidoptera;Cupido minimus;NA;0.006;Cupido minimus;0.998921847863469;  
MW500230;Lepidoptera;Lampides boeticus;Lampides boeticus;1;Lampides boeticus;0.99999999545906;  
MW500238;Lepidoptera;Pyrgus warrenensis;NA;0.003;NA;0.99999999997732;  
MW500239;Lepidoptera;Gonepteryx rhamni;NA;0.474;Gonepteryx rhamni;0.982076396127858;  
MW500240;Lepidoptera;Lycaena dispar;Lycaena dispar;1;Lycaena dispar;0.999999976014408;  
MW500243;Lepidoptera;Celastrina argiolus;Celastrina argiolus;1;Celastrina  
argiolus;0.999527385150531;  
MW500244;Lepidoptera;Hamearis lucina;NA;NA;Hamearis lucina;0.99999999964501;  
MW500246;Lepidoptera;Pyrgus armoricanus;Pyrgus armoricanus;1;Pyrgus  
armoricanus;0.99700549775422;  
MW500247;Lepidoptera;Coenonympha gardetta;NA;0.001;Coenonympha gardetta;0.755947323088537;  
MW500250;Lepidoptera;Boloria dia;Boloria dia;1;Boloria dia;0.99999999980503;  
MW500253;Lepidoptera;Boloria pales;Boloria pales;0.994;Boloria pales;0.996534400227883;  
MW500257;Lepidoptera;Araschnia levana;Araschnia levana;1;Araschnia levana;0.99999772187832;  
MW500258;Lepidoptera;Gegenes pumilio;NA;0.065;Gegenes pumilio;0.99932292515067;  
MW500260;Lepidoptera;Satyrium spini;Satyrium spini;1;Satyrium spini;0.99998970093079;  
MW500261;Lepidoptera;Cupido minimus;NA;0.003;Cupido minimus;0.999787792962518;  
MW500263;Lepidoptera;Pyrgus armoricanus;Pyrgus armoricanus;1;Pyrgus  
armoricanus;0.999997353848817;  
MW500265;Lepidoptera;Erebia neoridas;Erebia neoridas;NA;Erebia neoridas;0.99856337132003;  
MW500266;Lepidoptera;Aricia cramera;Aricia cramera;1;Aricia cramera;0.999993731037033;  
MW500270;Lepidoptera;Satyrium acaciae;Satyrium acaciae;1;Satyrium acaciae;0.99999951077798;  
MW500271;Lepidoptera;Melitaea varia;Melitaea varia;1;Melitaea varia;0.99998939515614;  
MW500272;Lepidoptera;Celastrina argiolus;Celastrina argiolus;1;Celastrina  
argiolus;0.999631157817044;  
MW500274;Lepidoptera;Gonepteryx rhamni;NA;0.484;Gonepteryx rhamni;0.985247235474422;  
MW500275;Lepidoptera;Erebia pluto;Erebia pluto;1;Erebia pluto;0.99999970857715;  
MW500276;Lepidoptera;Lycaena hippothoe;NA;NA;Lycaena hippothoe;0.928973453460131;  
MW500277;Lepidoptera;Araschnia levana;Araschnia levana;1;Araschnia levana;0.999999772187832;  
MW500280;Lepidoptera;Melitaea didyma;Melitaea didyma;1;Melitaea didyma;0.996366765827355;  
MW500283;Lepidoptera;Hipparchia semele;NA;0.001;Hipparchia semele;0.709218943047224;  
MW500284;Lepidoptera;Polyommatus eros;NA;0.005;Polyommatus eros;0.962873614249808;  
MW500285;Lepidoptera;Erebia epiphron;NA;NA;Erebia epiphron;0.994401488812176;  
MW500289;Lepidoptera;Thymelicus sylvestris;NA;0.131;Thymelicus sylvestris;0.999961574491035;  
MW500293;Lepidoptera;Minois dryas;NA;0.025;Minois dryas;0.850746026247397;  
MW500294;Lepidoptera;Araschnia levana;Araschnia levana;1;Araschnia levana;0.999999772187832;  
MW500295;Lepidoptera;Lycaena virgaureae;NA;0.184;Lycaena virgaureae;0.999043506539379;  
MW500297;Lepidoptera;Erebia pluto;Erebia pluto;1;Erebia pluto;0.99999977588772;  
MW500298;Lepidoptera;Polyommatus dorylas;Polyommatus dorylas;0.008;Polyommatus  
dorylas;0.991281865899703;  
MW500300;Lepidoptera;Plebejus idas;NA;0.007;NA;0.999546324331549;

MW500301;Lepidoptera;Boloria pales;Boloria pales;0.006;Boloria pales;0.994321044512509;  
MW500303;Lepidoptera;Pieris napi;NA;0.014;Pieris napi;0.863798298490519;  
MW500304;Lepidoptera;Pieris napi;NA;0.011;Pieris napi;0.801985394724814;  
MW500305;Lepidoptera;Brenthis ino;Brenthis ino;0.983;Brenthis ino;0.998389943553863;  
MW500307;Lepidoptera;Melitaea varia;Melitaea varia;1;Melitaea varia;0.999997299635802;  
MW500311;Lepidoptera;Aglais urticae;NA;0.002;Aglais urticae;0.987497593219019;  
MW500313;Lepidoptera;Lycaena phlaeas;Lycaena phlaeas;1;Lycaena phlaeas;0.99999996363186;  
MW500315;Lepidoptera;Pieris napi;NA;NA;Pieris napi;0.884799983409304;  
MW500316;Lepidoptera;Coenonympha pamphilus;Coenonympha pamphilus;1;Coenonympha  
pamphilus;0.99999999999744;  
MW500317;Lepidoptera;Pyrgus andromedae;Pyrgus andromedae;1;Pyrgus andromedae;0.999808671605833;  
MW500319;Lepidoptera;Hipparchia fagi;NA;NA;Hipparchia fagi;0.955462131256705;  
MW500320;Lepidoptera;Melanargia galathea;Melanargia galathea;NA;Melanargia  
galathea;0.935799586887365;  
MW500321;Lepidoptera;Coenonympha gardetta;NA;0.001;Coenonympha gardetta;0.731095812176462;  
MW500322;Lepidoptera;Erebia euryale;NA;NA;Erebia euryale;0.889579980810358;  
MW500323;Lepidoptera;Pyrgus alveus;NA;0.003;NA;0.99999999997732;  
MW500325;Lepidoptera;Melitaea cinxia;Melitaea cinxia;0.01;Melitaea cinxia;0.99999999999858;  
MW500326;Lepidoptera;Argynnis aglaja;NA;NA;NA;0.99999999998051;  
MW500327;Lepidoptera;Carcharodus alceae;Carcharodus alceae;1;Carcharodus  
alceae;0.99999996776381;  
MW500328;Lepidoptera;Plebejus argus;NA;0.144;Plebejus argus;0.973899645622359;  
MW500331;Lepidoptera;Euphydryas maturna;NA;0.126;Euphydryas maturna;0.885705216462044;  
MW500332;Lepidoptera;Coenonympha gardetta;NA;0.12;NA;0.99999999999993;  
MW500333;Lepidoptera;Brenthis ino;Brenthis ino;1;Brenthis ino;0.999575084556096;  
MW500334;Lepidoptera;Cercyonis lupina;Hyponephele lupina;1;Hyponephele lupina;0.999999979579656;  
MW500336;Lepidoptera;Fabriciana niobe;NA;0.001;Fabriciana niobe;0.989214650993052;  
MW500337;Lepidoptera;Plebejus argus;NA;0.123;Plebejus argus;0.980927835351298;  
MW500339;Lepidoptera;Hipparchia semele;NA;NA;Hipparchia semele;0.748345401572611;  
MW500340;Lepidoptera;Coenonympha oedippus;Coenonympha oedippus;1;Coenonympha  
oedippus;0.999999999999659;  
MW500342;Lepidoptera;Gonepteryx rhamni;NA;0.003;Gonepteryx rhamni;0.977461721146986;  
MW500344;Lepidoptera;Polyommatus dorylas;Polyommatus dorylas;0.008;Polyommatus  
dorylas;0.991281865899703;  
MW500348;Lepidoptera;Gegenes pumilio;NA;0.051;Gegenes pumilio;0.999825034556942;  
MW500351;Lepidoptera;Colias alfacariensis;Colias alfacariensis;1;Colias  
alfacariensis;0.99992617603143;  
MW500352;Lepidoptera;Carcharodus alceae;Carcharodus alceae;0.999;Carcharodus  
alceae;0.99999998008462;  
MW500353;Lepidoptera;Argynnis paphia;Argynnis paphia;1;Argynnis paphia;0.999999991389927;  
MW500356;Lepidoptera;Minois dryas;NA;0.025;Minois dryas;0.850746026247397;  
MW500357;Lepidoptera;Euphydryas maturna;NA;NA;NA;0.99999999996973;  
MW500358;Lepidoptera;Melitaea nevadensis;NA;0.001;NA;0.99999995393698;  
MW500361;Lepidoptera;Pyrgus warrenensis;NA;0.003;NA;0.99999999997732;  
MW500363;Lepidoptera;Pieris napi;NA;0.011;Pieris napi;0.801985394724814;  
MW500364;Lepidoptera;Erebia pronoe;Erebia pronoe;0.001;Erebia pronoe;0.999597372785435;  
MW500366;Lepidoptera;Brenthis ino;Brenthis ino;0.001;Brenthis ino;0.994711912827522;  
MW500367;Lepidoptera;Vanessa cardui;Vanessa cardui;1;Vanessa cardui;0.999999696535827;  
MW500368;Lepidoptera;Polyommatus icarus;Polyommatus icarus;0.001;Polyommatus  
icarus;0.999851522482238;  
MW500369;Lepidoptera;Lycaena phlaeas;Lycaena phlaeas;1;Lycaena phlaeas;0.999999994740023;  
MW500370;Lepidoptera;Pyrgus malvoides;NA;0.176;Pyrgus malvoides;0.940490890379026;  
MW500372;Lepidoptera;Callophrys rubi;NA;0.001;Callophrys rubi;0.998885705938309;  
MW500377;Lepidoptera;Hipparchia statilinus;Hipparchia statilinus;1;Hipparchia  
statilinus;0.99999999999005;  
MW500380;Lepidoptera;Aglais urticae;Aglais urticae;0.001;Aglais urticae;0.990690600684087;  
MW500381;Lepidoptera;Pyrgus foulquieri;NA;0.001;NA;0.999999999985431;  
MW500382;Lepidoptera;Cyaniris semiargus;NA;NA;Cyaniris semiargus;0.999299367533383;  
MW500383;Lepidoptera;Erebia tyndarus;NA;NA;NA;0.99999999999783;  
MW500385;Lepidoptera;Erebia medusa;NA;0.009;Erebia medusa;0.986275612856827;  
MW500386;Lepidoptera;Polyommatus eros;NA;0.005;Polyommatus eros;0.95275169203039;  
MW500388;Lepidoptera;Argynnis aglaja;NA;NA;Speyeria aglaja;0.872991147917853;  
MW500390;Lepidoptera;Erebia ottomana;Erebia ottomana;1;Erebia ottomana;0.999999994283371;  
MW500391;Lepidoptera;Agriades orbitulus;NA;0.01;Agriades orbitulus;0.998991302227708;  
MW500392;Lepidoptera;Melitaea parthenoides;Melitaea parthenoides;1;Melitaea  
parthenoides;0.999999943212005;  
MW500393;Lepidoptera;Erebia pluto;Erebia pluto;1;Erebia pluto;0.999999977588772;  
MW500395;Lepidoptera;Erebia stiria;NA;NA;Erebia styx;0.890739244956497;  
MW500397;Lepidoptera;Carcharodus lavatherae;NA;0.323;Carcharodus lavatherae;0.997774178749013;  
MW500398;Lepidoptera;Erebia pronoe;Erebia pronoe;0.001;Erebia pronoe;0.999344723218063;  
MW500399;Lepidoptera;Lysandra coridon;Lysandra coridon;NA;Lysandra coridon;0.915150621461042;  
MW500400;Lepidoptera;Colias crocea;NA;NA;NA;0.99999999999568;  
MW500401;Lepidoptera;Erebia pluto;Erebia pluto;1;Erebia pluto;0.999999948555599;  
MW500404;Lepidoptera;Polyommatus amandus;Polyommatus amandus;0.007;Polyommatus  
amandus;0.999944246955852;  
MW500406;Lepidoptera;Melitaea parthenoides;Melitaea parthenoides;1;Melitaea  
parthenoides;0.999999969741709;

MW500408;Lepidoptera;Boloria euphrosyne;Boloria euphrosyne;1;Boloria euphrosyne;0.999998514406196;  
MW500410;Lepidoptera;Colias phicomone;NA;0.001;Colias phicomone;0.985598879697681;  
MW500411;Lepidoptera;Euphydryas aurinia;NA;0.31;Euphydryas aurinia;0.993387708761386;  
MW500413;Lepidoptera;Nymphalis io;NA;0.49;Aglais io;0.91836704276321;  
MW500415;Lepidoptera;Pieris napi;NA;0.011;Pieris napi;0.801985394724814;  
MW500416;Lepidoptera;Boloria napaea;Boloria napaea;1;Boloria napaea;0.993134888141127;  
MW500417;Lepidoptera;Melitaea diamina;NA;0.305;Melitaea diamina;0.999999994065661;  
MW500418;Lepidoptera;Erebia neoridas;NA;NA;Erebia neoridas;0.997112686054603;  
MW500419;Lepidoptera;Hipparchia semele;NA;0.001;Hipparchia semele;0.818565218376102;  
MW500420;Lepidoptera;Callophrys rubi;NA;0.002;Callophrys rubi;0.995850865194932;  
MW500422;Lepidoptera;Thymelicus lineola;Thymelicus lineola;1;Thymelicus lineola;0.999971535093703;  
MW500423;Lepidoptera;Melitaea nevadensis;NA;0.001;NA;0.99999999891422;  
MW500427;Lepidoptera;Cyaniris semiargus;NA;NA;Cyaniris semiargus;0.999051841766953;  
MW500430;Lepidoptera;Cyaniris semiargus;NA;NA;Cyaniris semiargus;0.998476508766172;  
MW500431;Lepidoptera;Euphydryas cynthia;Euphydryas cynthia;1;Euphydryas cynthia;0.99999999705039;  
MW500433;Lepidoptera;Argynnis paphia;Argynnis paphia;1;Argynnis paphia;0.999999991389927;  
MW500435;Lepidoptera;Pyrgus armoricanus;Pyrgus armoricanus;1;Pyrgus armoricanus;0.997478680096412;  
MW500436;Lepidoptera;Celastrina argiolus;Celastrina argiolus;1;Celastrina argiolus;0.999527385150531;  
MW500439;Lepidoptera;Pyrgus armoricanus;Pyrgus armoricanus;1;Pyrgus armoricanus;0.997478680096412;  
MW500441;Lepidoptera;Thymelicus lineola;Thymelicus lineola;1;Thymelicus lineola;0.999989727155751;  
MW500444;Lepidoptera;Erebia stiria;NA;NA;Erebia styx;0.890739244956497;  
MW500446;Lepidoptera;Coenonympha pamphilus;Coenonympha pamphilus;1;Coenonympha pamphilus;0.999999999999091;  
MW500449;Lepidoptera;Aphantopus hyperantus;Aphantopus hyperantus;0.004;Aphantopus hyperantus;0.999598909345147;  
MW500450;Lepidoptera;Parnassius apollo;Parnassius apollo;1;Parnassius apollo;0.992704703916692;  
MW500451;Lepidoptera;Cupido minimus;NA;0.008;Cupido minimus;0.999319672482489;  
MW500453;Lepidoptera;Boloria euphrosyne;Boloria euphrosyne;0.008;Boloria euphrosyne;0.999964281413411;  
MW500455;Lepidoptera;Erebia mnestra;Erebia mnestra;0.001;Erebia mnestra;0.999937560187875;  
MW500457;Lepidoptera;Erebia euryale;NA;NA;Erebia euryale;0.889230517271439;  
MW500459;Lepidoptera;Coenonympha pamphilus;Coenonympha pamphilus;1;Coenonympha pamphilus;0.999999999999744;  
MW500460;Lepidoptera;Boloria thore;Boloria thore;1;Boloria thore;0.999999997947043;  
MW500462;Lepidoptera;Coenonympha gardetta;Coenonympha gardetta;0.001;Coenonympha gardetta;0.812426757800029;  
MW500464;Lepidoptera;Thecla betulae;Thecla betulae;1;Thecla betulae;0.999999999961119;  
MW500466;Lepidoptera;Polyommatus thersites;NA;0.33;Polyommatus thersites;0.999999477278829;  
MW500467;Lepidoptera;Nymphalis egea;Polygonia egea;1;Polygonia egea;0.999999674454695;  
MW500468;Lepidoptera;Argynnis paphia;Argynnis paphia;1;Argynnis paphia;0.999999991389927;  
MW500471;Lepidoptera;Pyrgus warrenensis;NA;0.003;NA;0.99999999997732;  
MW500472;Lepidoptera;Polyommatus daphnis;Polyommatus daphnis;1;Polyommatus daphnis;0.999913740418179;  
MW500473;Lepidoptera;Phengaris arion;NA;0.027;Phengaris arion;0.932114297067478;  
MW500474;Lepidoptera;Boloria euphrosyne;Boloria euphrosyne;1;Boloria euphrosyne;0.999998514406196;  
MW500476;Lepidoptera;Lycaena phlaeas;Lycaena phlaeas;1;Lycaena phlaeas;0.999999994740023;  
MW500477;Lepidoptera;Polyommatus icarus;NA;0.13;Polyommatus icarus;0.979762695748748;  
MW500481;Lepidoptera;Colias crocea;NA;NA;0.99999999997665;  
MW500482;Lepidoptera;Pyrgus cacaliae;Pyrgus cacaliae;0.001;Pyrgus cacaliae;0.99354498208327;  
MW500486;Lepidoptera;Maniola jurtina;NA;0.163;NA;0.99999999999256;  
MW500488;Lepidoptera;Fabriciana niobe;NA;0.005;Fabriciana niobe;0.992125835358755;  
MW500492;Lepidoptera;Plebejus argus;NA;0.268;Plebejus argus;0.977193479907785;  
MW500494;Lepidoptera;Favonius quercus;NA;NA;NA;0.99999999996808;  
MW500495;Lepidoptera;Erynnis tages;Erynnis tages;1;Erynnis tages;0.999999281987018;  
MW500497;Lepidoptera;Hipparchia hermione;NA;NA;NA;0.99999999999991;  
MW500499;Lepidoptera;Melitaea diamina;NA;0.331;Melitaea diamina;0.99999967992836;  
MW500502;Lepidoptera;Aricia artaxerxes;Plebejus argus;1;Aricia artaxerxes;0.999743187199922;  
MW500503;Lepidoptera;Euphydryas maturna;NA;0.126;Euphydryas maturna;0.885705216462044;  
MW500505;Lepidoptera;Pyrgus armoricanus;Pyrgus armoricanus;1;Pyrgus armoricanus;0.999997353848817;  
MW500506;Lepidoptera;Satyrium pruni;NA;0.076;Satyrium pruni;0.990322364021655;  
MW500507;Lepidoptera;Fabriciana adippe;Fabriciana adippe;0.028;Fabriciana adippe;0.969769198942097;  
MW500508;Lepidoptera;Erebia styx;NA;0.114;Erebia styx;0.897153119034683;  
MW500509;Lepidoptera;Brenthis ino;Brenthis ino;1;Brenthis ino;0.997823940101957;  
MW500510;Lepidoptera;Lycaena dispar;Lycaena dispar;1;Lycaena dispar;0.999999992566444;  
MW500512;Lepidoptera;Pyrgus carthami;Pyrgus carthami;1;Pyrgus carthami;0.999981753488076;  
MW500513;Lepidoptera;Nymphalis antiopa;NA;0.211;Nymphalis antiopa;0.999999909706393;  
MW500517;Lepidoptera;Melitaea parthenoides;Melitaea parthenoides;1;Melitaea parthenoides;0.999999993530452;

MW500522;Lepidoptera;Erebia montana;Erebia montana;1;Erebia montana;0.999627744460498;  
MW500523;Lepidoptera;Brenthis daphne;Brenthis daphne;0.001;Brenthis daphne;0.996209297077896;  
MW500524;Lepidoptera;Pyrgus sidae;Pyrgus sidae;1;Pyrgus sidae;0.999963846038595;  
MW500525;Lepidoptera;Fabriciana niobe;NA;0.005;Fabriciana niobe;0.992125835358755;  
MW500528;Lepidoptera;Melitaea nevadensis;NA;0.007;NA;0.99999999861988;  
MW500529;Lepidoptera;Coenonympha pamphilus;Coenonympha pamphilus;1;Coenonympha  
pamphilus;0.99999999999744;  
MW500533;Lepidoptera;Coenonympha pamphilus;Coenonympha pamphilus;1;Coenonympha  
pamphilus;0.99999999999744;  
MW500534;Lepidoptera;Satyrium acaciae;Satyrium acaciae;1;Satyrium acaciae;0.999998742538418;  
MW500535;Lepidoptera;Aricia eumedon;Eumedonia eumedon;0.001;Eumedonia eumedon;0.998109622286715;  
MW500537;Lepidoptera;Erynnis tages;Erynnis tages;1;Erynnis tages;0.999999281987018;  
MW500538;Lepidoptera;Fabriciana niobe;Fabriciana niobe;0.001;Fabriciana niobe;0.992799637252307;  
MW500539;Lepidoptera;Chazara briseis;NA;0.005;Chazara briseis;0.999820026505414;  
MW500540;Lepidoptera;Erebia medusa;NA;0.04;Erebia medusa;0.984042649596477;  
MW500544;Lepidoptera;Colias crocea;NA;0.059;NA;0.99999999999738;  
MW500546;Lepidoptera;Erebia epiphron;NA;NA;Erebia epiphron;0.986135568573405;  
MW500547;Lepidoptera;Brenthis daphne;Brenthis daphne;0.001;Brenthis daphne;0.996209297077896;  
MW500550;Lepidoptera;Agriades glandon;NA;0.002;Agriades glandon;0.987189585708506;  
MW500551;Lepidoptera;Nymphalis io;NA;0.174;Aglais io;0.887622158869515;  
MW500552;Lepidoptera;Erebia oeme;NA;0.182;Erebia oeme;0.99999999893248;  
MW500554;Lepidoptera;Lasiommata maera;Lasiommata maera;1;Lasiommata maera;0.999998718924555;  
MW500555;Lepidoptera;Erynnis tages;Erynnis tages;1;Erynnis tages;0.999999281987018;  
MW500556;Lepidoptera;Maniola jurtina;NA;0.004;NA;0.99999999998764;  
MW500557;Lepidoptera;Erebia montana;Erebia montana;0.002;Erebia montana;0.999531648161136;  
MW500563;Lepidoptera;Gonepteryx rhamni;NA;0.183;Gonepteryx rhamni;0.991353407168274;  
MW500564;Lepidoptera;Fabriciana adippe;Fabriciana adippe;NA;Fabriciana adippe;0.933435870704518;  
MW500568;Lepidoptera;Boloria selene;NA;0.176;Boloria selene;0.999999198721704;  
MW500569;Lepidoptera;Coenonympha arcania;NA;0.001;NA;0.99999999999975;  
MW500570;Lepidoptera;Aricia eumedon;Eumedonia eumedon;1;Eumedonia eumedon;0.990532058725973;  
MW500571;Lepidoptera;Cyaniris semiargus;NA;NA;Cyaniris semiargus;0.999051841766953;  
MW500572;Lepidoptera;Erebia mnestra;Erebia mnestra;1;Erebia mnestra;0.999960502069287;  
MW500574;Lepidoptera;Satyrium acaciae;Satyrium acaciae;1;Satyrium acaciae;0.999999956253988;  
MW500577;Lepidoptera;Gonepteryx rhamni;NA;0.087;Gonepteryx rhamni;0.992691684595033;  
MW500578;Lepidoptera;Aglais urticae;NA;0.002;Aglais urticae;0.987497593219019;  
MW500580;Lepidoptera;Colias palaeno;Colias palaeno;0.001;NA;0.99999999992202;  
MW500581;Lepidoptera;Fabriciana adippe;Fabriciana adippe;0.024;Fabriciana  
adippe;0.951887015690062;  
MW500583;Lepidoptera;Pyrgus carlinae;NA;NA;Pyrgus carlinae;0.854199018204849;  
MW500584;Lepidoptera;Polyommatus humedasa;Polyommatus humedasa;1;Polyommatus  
humedasa;0.997627527054125;  
MW500585;Lepidoptera;Anthocharis euphenoides;NA;0.172;Anthocharis euphenoides;0.943741664916385;  
MW500586;Lepidoptera;Polyommatus escheri;Polyommatus escheri;1;Polyommatus  
escheri;0.99999820756726;  
MW500587;Lepidoptera;Lysandra hispana;NA;NA;NA;0.997009937126184;  
MW500588;Lepidoptera;Nymphalis egea;Polygonia egea;1;Polygonia egea;0.999999758078475;  
MW500590;Lepidoptera;Boloria selene;NA;0.281;Boloria selene;0.99999960392712;  
MW500591;Lepidoptera;Lycaena thersamon;NA;NA;Lycaena thersamon;0.933284272031275;  
MW500593;Lepidoptera;Erebia pronoe;Erebia pronoe;0.001;Erebia pronoe;0.999412757816713;  
MW500594;Lepidoptera;Hipparchia hermione;NA;NA;NA;0.99999999999991;  
MW500595;Lepidoptera;Cupido argiades;NA;0.499;NA;0.999999999984682;  
MW500597;Lepidoptera;Lycaena hippothoe;Lycaena hippothoe;NA;Lycaena hippothoe;0.929815071946357;  
MW500598;Lepidoptera;Euphydryas aurinia;NA;0.125;Euphydryas aurinia;0.99016799090659;  
MW500599;Lepidoptera;Glaucopsyche alexis;Glaucopsyche alexis;0.001;Glaucopsyche  
alexis;0.94042380088325;  
MW500600;Lepidoptera;Cyaniris semiargus;NA;NA;Cyaniris semiargus;0.999051841766953;  
MW500602;Lepidoptera;Polyommatus thersites;NA;0.323;Polyommatus thersites;0.999998798408978;  
MW500603;Lepidoptera;Cupido alcetas;NA;0.218;Cupido alcetas;0.833501983138177;  
MW500604;Lepidoptera;Anthocharis cardamines;Anthocharis cardamines;1;Anthocharis  
cardamines;0.999999940675226;  
MW500605;Lepidoptera;Cercyonis lupina;Hyponephele lupina;1;Hyponephele lupina;0.999999953461157;  
MW500606;Lepidoptera;Aphantopus hyperantus;Aphantopus hyperantus;0.003;Aphantopus  
hyperantus;0.999999455871523;  
MW500608;Lepidoptera;Boloria titania;Boloria titania;0.001;Boloria titania;0.999723894737618;  
MW500610;Lepidoptera;Carcharodus alceae;Carcharodus alceae;NA;Carcharodus  
alceae;0.999998131544272;  
MW500612;Lepidoptera;Boloria napaea;Boloria napaea;1;Boloria napaea;0.990249356006584;  
MW500613;Lepidoptera;Euphydryas maturna;NA;NA;NA;0.999999999996973;  
MW500615;Lepidoptera;Brintesia circe;Brintesia circe;1;Brintesia circe;0.999999277739965;  
MW500617;Lepidoptera;Coenonympha arcania;NA;0.13;NA;0.99999999999984;  
MW500619;Lepidoptera;Aglais urticae;NA;0.002;Aglais urticae;0.987497593219019;  
MW500622;Lepidoptera;Nymphalis io;NA;0.491;Aglais io;0.930153237246992;  
MW500625;Lepidoptera;Gonepteryx rhamni;NA;0.474;Gonepteryx rhamni;0.982076396127858;  
MW500626;Lepidoptera;Pyrgus armoricanus;Pyrgus armoricanus;1;Pyrgus  
armoricanus;0.997478680096412;  
MW500627;Lepidoptera;Polyommatus eros;NA;0.001;Polyommatus eros;0.885686323723006;  
MW500630;Lepidoptera;Aglais urticae;NA;NA;Aglais urticae;0.985780134057395;  
MW500631;Lepidoptera;Pyrgus sidae;Pyrgus sidae;1;Pyrgus sidae;0.99996750457282;

MW500639;Lepidoptera;Cupido minimus;NA;0.009;Cupido minimus;0.999791453712643;  
MW500643;Lepidoptera;Hipparchia fagi;NA;NA;Hipparchia fagi;0.977048494324972;  
MW500644;Lepidoptera;Pyrgus malvae;Pyrgus malvae;NA;Pyrgus malvae;0.980121140374433;  
MW500646;Lepidoptera;Helleia helle;Lycaena helle;1;Lycaena helle;0.99999993533947;  
MW500649;Lepidoptera;Satyrium spini;Satyrium spini;1;Satyrium spini;0.999999496031491;  
MW500652;Lepidoptera;Pyrgus armoricanus;Pyrgus armoricanus;1;Pyrgus armoricanus;0.99997353848817;  
MW500654;Lepidoptera;Lampides boeticus;Lampides boeticus;1;Lampides boeticus;0.99999999417554;  
MW500657;Lepidoptera;Pieris napi;NA;0.028;Pieris napi;0.888205720664699;  
MW500658;Lepidoptera;Cupido osiris;Cupido osiris;0.001;Cupido osiris;0.99999920729954;  
MW500660;Lepidoptera;Nymphalis io;NA;0.491;Aglaia io;0.930153237246992;  
MW500661;Lepidoptera;Erebia styx;NA;NA;Erebia styx;0.962664978932439;  
MW500663;Lepidoptera;Hipparchia semele;NA;0.001;Hipparchia semele;0.841747677780305;  
MW500664;Lepidoptera;Pieris napi;NA;0.028;Pieris napi;0.888205720664699;  
MW500665;Lepidoptera;Hipparchia semele;NA;0.003;Hipparchia semele;0.834456891394975;  
MW500668;Lepidoptera;Lycaena hippothoe;NA;NA;Lycaena hippothoe;0.932519613011228;  
MW500669;Lepidoptera;Thecla betulae;Thecla betulae;1;Thecla betulae;0.99999999961119;  
MW500670;Lepidoptera;Gonepteryx rhamni;NA;0.474;Gonepteryx rhamni;0.982076396127858;  
MW500672;Lepidoptera;Argynnis aglaja;NA;0.001;NA;0.99999999999586;  
MW500677;Lepidoptera;Melitaea cinxia;Melitaea cinxia;0.01;Melitaea cinxia;0.99999999999858;  
MW500678;Lepidoptera;Brintesia circe;Brintesia circe;NA;Brintesia circe;0.999999592702691;  
MW500681;Lepidoptera;Thymelicus lineola;Thymelicus lineola;0.996;Thymelicus lineola;0.999985402905494;  
MW500683;Lepidoptera;Coenonympha rhodopensis;NA;0.029;Coenonympha rhodopensis;0.880788896557773;  
MW500684;Lepidoptera;Aphantopus hyperantus;Aphantopus hyperantus;0.006;Aphantopus hyperantus;0.999998615504572;  
MW500685;Lepidoptera;Melitaea diamina;Melitaea diamina;0.003;Melitaea diamina;0.99999804231029;  
MW500687;Lepidoptera;Lysandra coridon;NA;NA;Lysandra coridon;0.814397806071144;  
MW500688;Lepidoptera;Boloria pales;Boloria pales;1;Boloria pales;0.99847060885702;  
MW500689;Lepidoptera;Euphydryas aurinia;NA;0.31;Euphydryas aurinia;0.993387708761386;  
MW500691;Lepidoptera;Gonepteryx cleopatra;Gonepteryx cleopatra;0.998;Gonepteryx cleopatra;0.999118636582266;  
MW500693;Lepidoptera;Apatura iris;Apatura iris;1;Apatura iris;0.99999999999972;  
MW500694;Lepidoptera;Plebejus idas;NA;0.001;NA;0.999062881076248;  
MW500699;Lepidoptera;Coenonympha pamphilus;Coenonympha pamphilus;1;Coenonympha pamphilus;0.99999999999744;  
MW500700;Lepidoptera;Fabriciana niobe;NA;0.001;Fabriciana niobe;0.989214650993052;  
MW500702;Lepidoptera;Pyrgus foulquieri;NA;0.001;NA;0.999999999985431;  
MW500703;Lepidoptera;Coenonympha oedippus;Coenonympha oedippus;1;Coenonympha oedippus;0.99999999999886;  
MW500706;Lepidoptera;Heteropterus morpheus;NA;NA;Heteropterus morpheus;0.99999999999943;  
MW500708;Lepidoptera;Polyommatus icarus;NA;0.003;Polyommatus icarus;0.986125651677522;  
MW500710;Lepidoptera;Erebia euryale;NA;NA;Erebia euryale;0.960120676034331;  
MW500717;Lepidoptera;Argynnis aglaja;NA;NA;Speyeria aglaja;0.872991147917853;  
MW500719;Lepidoptera;Nymphalis c-album;NA;0.215;NA;0.999999192918557;  
MW500720;Lepidoptera;Vanessa atalanta;Vanessa atalanta;1;Vanessa atalanta;0.999999999757762;  
MW500721;Lepidoptera;Melitaea didyma;Melitaea didyma;NA;Melitaea didyma;0.98069428171586;  
MW500726;Lepidoptera;Colias alfacariensis;Colias alfacariensis;0.001;Colias alfacariensis;0.999966522684745;  
MW500727;Lepidoptera;Erebia pandrose;NA;0.001;Erebia pandrose;0.994671877029885;  
MW500728;Lepidoptera;Nymphalis c-album;NA;0.215;NA;0.999999192918557;  
MW500729;Lepidoptera;Pyrgus malvae;Pyrgus malvae;NA;Pyrgus malvae;0.980121140374433;  
MW500730;Lepidoptera;Aphantopus hyperantus;Aphantopus hyperantus;0.004;Aphantopus hyperantus;0.999598909345147;  
MW500731;Lepidoptera;Erebia styx;NA;NA;Erebia styx;0.890739244956497;  
MW500732;Lepidoptera;Favonius quercus;NA;NA;Favonius quercus;0.724712060950685;  
MW500734;Lepidoptera;Celastrina argiolus;Celastrina argiolus;1;Celastrina argiolus;0.999411622577966;  
MW500735;Lepidoptera;Gonepteryx rhamni;NA;0.474;Gonepteryx rhamni;0.982076396127858;  
MW500736;Lepidoptera;Pyrgus alveus;NA;NA;Pyrgus alveus;0.931750071912489;  
MW500738;Lepidoptera;Euphydryas intermedia;NA;NA;NA;0.99999999996973;  
MW500739;Lepidoptera;Nymphalis antiopa;NA;0.211;Nymphalis antiopa;0.999999909706393;  
MW500740;Lepidoptera;Erebia pluto;Erebia pluto;1;Erebia pluto;0.999999977588772;  
MW500742;Lepidoptera;Colias alfacariensis;Colias alfacariensis;1;Colias alfacariensis;0.999986994131001;  
MW500748;Lepidoptera;Pyrgus alveus;NA;0.003;NA;0.99999999997732;  
MW500749;Lepidoptera;Erynnis tages;Erynnis tages;1;Erynnis tages;0.999999281987018;  
MW500750;Lepidoptera;Lycaena phlaeas;Lycaena phlaeas;1;Lycaena phlaeas;0.99999996363186;  
MW500751;Lepidoptera;Erynnis tages;Erynnis tages;1;Erynnis tages;0.999999281987018;  
MW500752;Lepidoptera;Erebia mnestra;Erebia mnestra;0.002;Erebia mnestra;0.999845899963913;  
MW500753;Lepidoptera;Pyrgus warrenensis;NA;NA;NA;0.99999999985029;  
MW500756;Lepidoptera;Plebejus argus;NA;0.04;Plebejus argus;0.980859624104987;  
MW500757;Lepidoptera;Erebia ottomana;Erebia ottomana;1;Erebia ottomana;0.99999994283371;  
MW500760;Lepidoptera;Cupido osiris;Cupido osiris;1;Cupido osiris;0.99993358102515;  
MW500761;Lepidoptera;Erebia pluto;Erebia pluto;1;Erebia pluto;0.99999921883617;  
MW500763;Lepidoptera;Erebia melampus;Erebia melampus;0.011;Erebia melampus;0.975499903768874;  
MW500764;Lepidoptera;Thymelicus lineola;Thymelicus lineola;1;Thymelicus lineola;0.999932511874613;

MW500765;Lepidoptera;Cupido minimus;NA;0.001;Cupido minimus;0.999744526451824;  
MW500766;Lepidoptera;Lysandra coridon;NA;NA;NA;0.999974015575741;  
MW500767;Lepidoptera;Maniola jurtina;NA;0.038;NA;0.99999999999524;  
MW500768;Lepidoptera;Boloria selene;NA;0.256;Boloria selene;0.999999827326818;  
MW500770;Lepidoptera;Argynnis aglaja;NA;NA;Speyeria aglaja;0.872991147917853;  
MW500772;Lepidoptera;Polyommatus icarus;NA;0.003;Polyommatus icarus;0.986125651677522;  
MW500774;Lepidoptera;Erebia melampus;Erebia melampus;NA;Erebia melampus;0.950990028966024;  
MW500775;Lepidoptera;Polyommatus escheri;Polyommatus escheri;1;Polyommatus  
escheri;0.99999985205022;  
MW500777;Lepidoptera;Celastrina argiolus;Celastrina argiolus;1;Celastrina  
argiolus;0.999527385150531;  
MW500779;Lepidoptera;Erebia styx;NA;NA;Erebia styx;0.962664978932439;  
MW500780;Lepidoptera;Melanargia galathea;Melanargia galathea;NA;Melanargia  
galathea;0.959429932872284;  
MW500781;Lepidoptera;Aricia eumedon;Eumedonia eumedon;0.001;Eumedonia eumedon;0.998109622286715;  
MW500782;Lepidoptera;Satyrus actaea;Satyrus actaea;0.002;Satyrus actaea;0.996459824853088;  
MW500783;Lepidoptera;Lysandra hispana;NA;NA;NA;0.998346382460118;  
MW500788;Lepidoptera;Brenthis hecate;NA;0.022;Brenthis hecate;0.99956322038128;  
MW500790;Lepidoptera;Cupido minimus;NA;0.006;Cupido minimus;0.999768371759258;  
MW500796;Lepidoptera;Lycaena hippothoe;NA;NA;Lycaena hippothoe;0.96171722036274;  
MW500798;Lepidoptera;Brenthis hecate;NA;0.133;Brenthis hecate;0.999680427441898;  
MW500800;Lepidoptera;Hipparchia semele;NA;0.002;Hipparchia semele;0.734976614728646;  
MW500801;Lepidoptera;Plebejus argyrognomon;NA;0.001;NA;0.994620093546684;  
MW500803;Lepidoptera;Plebejus argus;NA;0.116;Plebejus argus;0.981691474965552;  
MW500806;Lepidoptera;Gonepteryx cleopatra;Gonepteryx cleopatra;0.998;Gonepteryx  
cleopatra;0.999118636582266;  
MW500807;Lepidoptera;Cupido argiades;NA;0.499;NA;0.999999999984682;  
MW500808;Lepidoptera;Gonepteryx rhamni;NA;0.474;Gonepteryx rhamni;0.982076396127858;  
MW500809;Lepidoptera;Erebia medusa;NA;0.04;Erebia medusa;0.984042649596477;  
MW500810;Lepidoptera;Carterocephalus palaemon;NA;0.052;Carterocephalus  
palaemon;0.728445051795325;  
MW500811;Lepidoptera;Aricia eumedon;NA;0.128;NA;0.999999992682818;  
MW500812;Lepidoptera;Coenonympha rhodopensis;Coenonympha rhodopensis;0.002;Coenonympha  
rhodopensis;0.972179742721853;  
MW500814;Lepidoptera;Erebia tyndarus;NA;NA;NA;0.99999999999923;  
MW500818;Lepidoptera;Colias crocea;NA;0.059;NA;0.999999999999738;  
MW500820;Lepidoptera;Erebia pandrose;Erebia pandrose;1;Erebia pandrose;0.997930044419019;  
MW500821;Lepidoptera;Pyrgus foulquieri;NA;NA;Pyrgus alveus;0.827119616974978;  
MW500822;Lepidoptera;Ochlodes sylvanus;NA;0.316;Ochlodes sylvanus;0.996318754838625;  
MW500823;Lepidoptera;Aricia eumedon;NA;0.165;Eumedonia eumedon;0.997935861618608;  
MW500824;Lepidoptera;Cyaniris semiargus;NA;NA;Cyaniris semiargus;0.999343777168345;  
MW500826;Lepidoptera;Cupido minimus;NA;0.001;Cupido minimus;0.999803920701362;  
MW500827;Lepidoptera;Colias palaeno;NA;0.001;NA;0.999999999982869;  
MW500831;Lepidoptera;Melitaea didyma;Melitaea didyma;NA;Melitaea didyma;0.98069428171586;  
MW500838;Lepidoptera;Erebia euryale;NA;NA;Erebia euryale;0.889230517271439;  
MW500844;Lepidoptera;Scolitantides orion;Scolitantides orion;1;Scolitantides  
orion;0.999999981949031;  
MW500846;Lepidoptera;Limenitis camilla;NA;0.001;Limenitis camilla;0.99988345647178;  
MW500847;Lepidoptera;Pyrgus warrenensis;NA;NA;NA;0.999999999995618;  
MW500850;Lepidoptera;Argynnis aglaja;NA;NA;Speyeria aglaja;0.872991147917853;  
MW500851;Lepidoptera;Cupido argiades;NA;0.499;NA;0.999999999984682;  
MW500854;Lepidoptera;Plebejus argus;NA;0.041;Plebejus argus;0.97038324097365;  
MW500855;Lepidoptera;Polyommatus amandus;Polyommatus amandus;0.002;Polyommatus  
amandus;0.99998879592523;  
MW500858;Lepidoptera;Aphantopus hyperantus;Aphantopus hyperantus;0.002;Aphantopus  
hyperantus;0.999999300149444;  
MW500861;Lepidoptera;Erebia pluto;Erebia pluto;1;Erebia pluto;0.999999948555599;  
MW500862;Lepidoptera;Charaxes jasius;NA;NA;Charaxes jasius;0.983079278690226;  
MW500863;Lepidoptera;Aglais urticae;NA;0.002;Aglais urticae;0.987497593219019;  
MW500866;Lepidoptera;Pyrgus andromedae;NA;0.002;Pyrgus andromedae;0.989684399291934;  
MW500868;Lepidoptera;Oeneis glacialis;Oeneis glacialis;NA;Oeneis glacialis;0.98649241679956;  
MW500870;Lepidoptera;Lycaena virgaureae;NA;0.124;Lycaena virgaureae;0.999277971628823;  
MW500871;Lepidoptera;Erebia pharte;Erebia pharte;1;Erebia pharte;0.9999999630495;  
MW500872;Lepidoptera;Boloria thore;Boloria thore;1;Boloria thore;0.99999998359726;  
MW500874;Lepidoptera;Satyrus actaea;Satyrus actaea;0.002;Satyrus actaea;0.996459824853088;  
MW500878;Lepidoptera;Aphantopus hyperantus;Aphantopus hyperantus;0.006;Aphantopus  
hyperantus;0.99998615504572;  
MW500879;Lepidoptera;Boloria pales;Boloria pales;0.001;Boloria pales;0.994217357158582;  
MW500880;Lepidoptera;Lysandra coridon;NA;NA;Lysandra coridon;0.900563733578008;  
MW500882;Lepidoptera;Polyommatus escheri;Polyommatus escheri;1;Polyommatus  
escheri;0.999855172568018;  
MW500884;Lepidoptera;Aglais urticae;Aglais urticae;0.001;Aglais urticae;0.990690600684087;  
MW500885;Lepidoptera;Fabriciana adippe;Fabriciana adippe;0.028;Fabriciana  
adippe;0.969769198942097;  
MW500887;Lepidoptera;Boloria thore;Boloria thore;1;Boloria thore;0.99999998359726;  
MW500888;Lepidoptera;Thecla betulae;Thecla betulae;1;Thecla betulae;0.99999999961346;  
MW500889;Lepidoptera;Callophrys rubi;NA;0.001;Callophrys rubi;0.998885705938309;  
MW500890;Lepidoptera;Boloria titania;Boloria titania;0.001;Boloria titania;0.999804408897271;

MW500892;Lepidoptera;Pieris napi;NA;NA;Pieris napi;0.81248084453044;  
MW500895;Lepidoptera;Hipparchia fagi;NA;NA;Hipparchia fagi;0.917247093879232;  
MW500896;Lepidoptera;Aricia artaxerxes;Plebejus argus;1;Aricia artaxerxes;0.999743187199922;  
MW500898;Lepidoptera;Melitaea varia;Melitaea varia;1;Melitaea varia;0.999988794100833;  
MW500899;Lepidoptera;Melitaea cinxia;Melitaea cinxia;1;Melitaea cinxia;0.999999999999602;  
MW500900;Lepidoptera;Maniola jurtina;NA;0.001;Maniola jurtina;0.939220105860875;  
MW500901;Lepidoptera;Erebia nivalis;NA;NA;NA;0.999999999999947;  
MW500902;Lepidoptera;Anthocharis cardamines;Anthocharis cardamines;1;Anthocharis cardamines;0.999999940675226;  
MW500903;Lepidoptera;Thymelicus lineola;Thymelicus lineola;1;Thymelicus lineola;0.999971535093703;  
MW500905;Lepidoptera;Gegenes pumilio;NA;0.138;Gegenes pumilio;0.997791408990471;  
MW500907;Lepidoptera;Boloria dia;Boloria dia;1;Boloria dia;0.99999999525812;  
MW500910;Lepidoptera;Thymelicus lineola;Thymelicus lineola;1;Thymelicus lineola;0.999971535093703;  
MW500911;Lepidoptera;Carterocephalus palaemon;Carterocephalus palaemon;0.003;Carterocephalus palaemon;0.74641096486007;  
MW500912;Lepidoptera;Gonepteryx rhamni;NA;0.474;Gonepteryx rhamni;0.982076396127858;  
MW500913;Lepidoptera;Coenonympha rhodopensis;Coenonympha rhodopensis;0.01;Coenonympha rhodopensis;0.912323431995304;  
MW500914;Lepidoptera;Limenitis camilla;Limenitis camilla;0.009;Limenitis camilla;0.9999828626808;  
MW500915;Lepidoptera;Cyaniris semiargus;NA;NA;Cyaniris semiargus;0.999459016173358;  
MW500919;Lepidoptera;Melitaea diamina;NA;0.149;Melitaea diamina;0.999999996592464;  
MW500920;Lepidoptera;Cercyonis lupina;Hyponephele lupina;1;Hyponephele lupina;0.999999979579656;  
MW500921;Lepidoptera;Coenonympha pamphilus;Coenonympha pamphilus;1;Coenonympha pamphilus;0.999999999997016;  
MW500922;Lepidoptera;Maniola jurtina;NA;0.001;Maniola jurtina;0.939220105860875;  
MW500924;Lepidoptera;Aglais urticae;Aglais urticae;0.001;Aglais urticae;0.990690600684087;  
MW500925;Lepidoptera;Plebejus argus;NA;0.328;Plebejus argus;0.969789734199889;  
MW500926;Lepidoptera;Boloria graeca;Boloria graeca;1;Boloria graeca;0.999999912715485;  
MW500929;Lepidoptera;Erebia christi;Erebia christi;1;Erebia christi;0.99999999972715;  
MW500933;Lepidoptera;Pararge aegeria;Pararge aegeria;1;Pararge aegeria;0.999999999963165;  
MW500934;Lepidoptera;Polyommatus icarus;NA;0.003;Polyommatus icarus;0.986125651677522;  
MW500935;Lepidoptera;Boloria napaea;Boloria napaea;1;Boloria napaea;0.996992739392985;  
MW500939;Lepidoptera;Erebia nivalis;NA;NA;NA;0.999999999999947;  
MW500940;Lepidoptera;Melitaea didyma;Melitaea didyma;0.996;Melitaea didyma;0.989682013961003;  
MW500941;Lepidoptera;Euphydryas aurinia;NA;0.31;Euphydryas aurinia;0.993387708761386;  
MW500943;Lepidoptera;Argynnis aglaja;NA;0.001;NA;0.99999999999586;  
MW500944;Lepidoptera;Vanessa cardui;Vanessa cardui;1;Vanessa cardui;0.999998771907216;  
MW500948;Lepidoptera;Colias crocea;NA;0.059;NA;0.99999999999738;  
MW500949;Lepidoptera;Melitaea nevadensis;NA;0.001;Melitaea celadussa;0.728603610157801;  
MW500951;Lepidoptera;Apatura iris;Apatura iris;1;Apatura iris;0.99999999999972;  
MW500953;Lepidoptera;Cupido argiades;NA;0.499;NA;0.999999999984682;  
MW500955;Lepidoptera;Thymelicus sylvestris;NA;0.042;Thymelicus sylvestris;0.9999626292829;  
MW500956;Lepidoptera;Boloria pales;Boloria pales;0.001;Boloria pales;0.996764634300083;  
MW500957;Lepidoptera;Nymphalis c-album;NA;0.215;NA;0.999999192918557;  
MW500959;Lepidoptera;Erebia eriphyle;Erebia eriphyle;1;Erebia eriphyle;0.999999983979336;  
MW500963;Lepidoptera;Brintesia circe;Brintesia circe;NA;Brintesia circe;0.999999592702691;  
MW500964;Lepidoptera;Heteropterus morpheus;NA;NA;Heteropterus morpheus;0.999999999999943;  
MW500965;Lepidoptera;Nymphalis c-album;NA;0.215;NA;0.999999192918557;  
MW500967;Lepidoptera;Erebia ottomana;Erebia ottomana;1;Erebia ottomana;0.999999994283371;  
MW500968;Lepidoptera;Coenonympha gardetta;NA;0.003;Coenonympha gardetta;0.773402540734451;  
MW500969;Lepidoptera;Pyrgus armoricanus;Pyrgus armoricanus;1;Pyrgus armoricanus;0.997478680096412;  
MW500970;Lepidoptera;Thymelicus lineola;Thymelicus lineola;0.005;Thymelicus lineola;0.999164350818141;  
MW500971;Lepidoptera;Polyommatus eros;NA;0.005;Polyommatus eros;0.95275169203039;  
MW500973;Lepidoptera;Lycaena phlaeas;Lycaena phlaeas;1;Lycaena phlaeas;0.99999990751576;  
MW500974;Lepidoptera;Cercyonis lupina;Hyponephele lupina;1;Hyponephele lupina;0.99999952440988;  
MW500975;Lepidoptera;Erebia pronoe;Erebia pronoe;1;Erebia pronoe;0.999639549642344;  
MW500976;Lepidoptera;Melitaea britomartis;Melicta britomartis;1;Melitaea britomartis;0.921480340185081;  
MW500977;Lepidoptera;Erebia stiria;NA;NA;Erebia styx;0.867929767138125;  
MW500979;Lepidoptera;Erebia medusa;NA;0.04;Erebia medusa;0.984042649596477;  
MW500980;Lepidoptera;Erebia euryale;NA;NA;Erebia euryale;0.917369646670944;  
MW500981;Lepidoptera;Brenthis daphne;NA;0.102;Brenthis daphne;0.717134521611551;  
MW500982;Lepidoptera;Carcharodus alceae;Carcharodus alceae;0.999;Carcharodus alceae;0.999999996339511;  
MW500984;Lepidoptera;Erebia tyndarus;NA;NA;NA;0.999999999999783;  
MW500986;Lepidoptera;Thymelicus sylvestris;NA;0.324;Thymelicus sylvestris;0.999940778442454;  
MW500987;Lepidoptera;Erebia pronoe;Erebia pronoe;1;Erebia pronoe;0.999639549642344;  
MW500988;Lepidoptera;Erebia pronoe;Erebia pronoe;0.997;Erebia pronoe;0.998539434649672;  
MW500989;Lepidoptera;Lycaena hippothoe;NA;NA;Lycaena hippothoe;0.929268253497542;  
MW500990;Lepidoptera;Maniola jurtina;NA;0.149;NA;0.999999999998573;  
MW500994;Lepidoptera;Euphydryas maturna;NA;NA;NA;0.999999999996973;  
MW500996;Lepidoptera;Aricia artaxerxes;Plebejus argus;1;Aricia artaxerxes;0.999743187199922;  
MW500997;Lepidoptera;Pararge aegeria;Pararge aegeria;1;Pararge aegeria;0.9999999999963165;

MW500999;Lepidoptera;Gonepteryx rhamni;NA;0.192;Gonepteryx rhamni;0.991002175992451;  
 MW501000;Lepidoptera;Aporia crataegi;NA;NA;Aporia crataegi;0.999997860566808;  
 MW501002;Lepidoptera;Colias hyale;Colias hyale;0.012;Colias hyale;0.99999756395992;  
 MW501003;Lepidoptera;Coenonympha rhodopensis;Coenonympha rhodopensis;0.001;Coenonympha rhodopensis;0.953917004161499;  
 MW501004;Lepidoptera;Apatura ilia;NA;0.039;Apatura ilia;0.977274423026401;  
 MW501005;Lepidoptera;Melitaea diamina;NA;0.149;Melitaea diamina;0.99999996592464;  
 MW501007;Lepidoptera;Vanessa cardui;Vanessa cardui;1;Vanessa cardui;0.99999850530696;  
 MW501009;Lepidoptera;Apatura iris;Apatura iris;1;Apatura iris;0.99999999999943;  
 MW501011;Lepidoptera;Satyrus actaea;Satyrus actaea;0.002;Satyrus actaea;0.998246235973604;  
 MW501012;Lepidoptera;Erebia montana;Erebia montana;0.999;Erebia montana;0.997589557700034;  
 MW501013;Lepidoptera;Erebia euryale;NA;NA;Erebia euryale;0.971976910059117;  
 MW501014;Lepidoptera;Aricia cramera;Aricia cramera;1;Aricia cramera;0.999993731037033;  
 MW501015;Lepidoptera;Plebejus idas;NA;0.001;NA;0.999446967101516;  
 MW501022;Lepidoptera;Lycaena dispar;Lycaena dispar;1;Lycaena dispar;0.99999990743959;  
 MW501024;Lepidoptera;Lycaena tityrus;Lycaena tityrus;1;Lycaena tityrus;0.999998928238034;  
 MW501025;Lepidoptera;Erebia pharte;Erebia pharte;1;Erebia pharte;0.9999999630495;  
 MW501026;Lepidoptera;Nymphalis antiopa;NA;0.23;Nymphalis antiopa;0.999999944198096;  
 MW501028;Lepidoptera;Erynnis tages;Erynnis tages;1;Erynnis tages;0.999999281987018;  
 MW501030;Lepidoptera;Euphydryas aurinia;NA;0.001;Euphydryas aurinia;0.995576749826865;  
 MW501031;Lepidoptera;Lycaena virgaureae;NA;0.073;Lycaena virgaureae;0.9995563158025;  
 MW501033;Lepidoptera;Boloria titania;Boloria titania;0.001;Boloria titania;0.99983358374111;  
 MW501035;Lepidoptera;Fabriciana niobe;Fabriciana niobe;0.001;Fabriciana niobe;0.90103065877981;  
 MW501036;Lepidoptera;Thymelicus sylvestris;NA;0.324;Thymelicus sylvestris;0.999940778442454;  
 MW501038;Lepidoptera;Limenitis camilla;Limenitis camilla;0.004;Limenitis camilla;0.999977522699516;  
 MW501040;Lepidoptera;Brintesia circe;Brintesia circe;1;Brintesia circe;0.99999969821626;  
 MW501041;Lepidoptera;Coenonympha oedippus;Coenonympha oedippus;1;Coenonympha oedippus;0.99999999999972;  
 MW501042;Lepidoptera;Favonius quercus;NA;NA;Favonius quercus;0.73046069582187;  
 MW501045;Lepidoptera;Araschnia levana;Araschnia levana;1;Araschnia levana;0.999999772187832;  
 MW501049;Lepidoptera;Boloria selene;NA;0.001;Boloria selene;0.999995370701811;  
 MW501052;Lepidoptera;Pieris napi;NA;0.011;Pieris napi;0.801985394724814;  
 MW501053;Lepidoptera;Agriades optilete;Agriades optilete;1;Agriades optilete;0.999999981865244;  
 MW501055;Lepidoptera;Satyrium acaciae;Satyrium acaciae;1;Satyrium acaciae;0.999999754684667;  
 MW501057;Lepidoptera;Satyrium spini;Satyrium spini;1;Satyrium spini;0.999999496031491;  
 MW501058;Lepidoptera;Pyrgus cacaliae;Pyrgus cacaliae;NA;Pyrgus cacaliae;0.992462992085655;  
 MW501060;Lepidoptera;Vanessa cardui;Vanessa cardui;1;Vanessa cardui;0.999999459983318;  
 MW501061;Lepidoptera;Gegenes nostrodamus;Gegenes nostrodamus;1;Gegenes nostrodamus;0.999999905536616;  
 MW501062;Lepidoptera;Polyommatus amandus;Polyommatus amandus;0.003;Polyommatus amandus;0.999980071833264;  
 MW501064;Lepidoptera;Limenitis camilla;Limenitis camilla;0.009;Limenitis camilla;0.9999828626808;  
 MW501065;Lepidoptera;Coenonympha dorus;Coenonympha dorus;1;Coenonympha dorus;0.999999974225603;  
 MW501066;Lepidoptera;Cupido argiades;NA;0.189;Cupido argiades;0.713277686893393;  
 MW501068;Lepidoptera;Pyrgus malvoides;NA;0.016;Pyrgus malvoides;0.878050137245322;  
 MW501072;Lepidoptera;Lasiommata megera;Lasiommata megera;1;Lasiommata megera;0.999928528239676;  
 MW501073;Lepidoptera;Lycaena hippothoe;Lycaena hippothoe;NA;Lycaena hippothoe;0.968121824155699;  
 MW501075;Lepidoptera;Fabriciana adippe;NA;NA;Fabriciana adippe;0.789542304996727;  
 MW501077;Lepidoptera;Cyaniris semiargus;NA;NA;Cyaniris semiargus;0.999051841766953;  
 MW501078;Lepidoptera;Satyrium spini;Satyrium spini;1;Satyrium spini;0.999999770577345;  
 MW501080;Lepidoptera;Boloria pales;Boloria pales;0.999;Boloria pales;0.996285072139612;  
 MW501081;Lepidoptera;Erebia styx;NA;NA;Erebia styx;0.900873106463349;  
 MW501084;Lepidoptera;Polyommatus eros;NA;0.001;Polyommatus eros;0.953542548925601;  
 MW501085;Lepidoptera;Erebia euryale;NA;NA;Erebia euryale;0.889230517271439;  
 MW501086;Lepidoptera;Boloria pales;Boloria pales;0.998;Boloria pales;0.997395083974412;  
 MW501088;Lepidoptera;Coenonympha gardetta;NA;0.001;Coenonympha gardetta;0.744671869920518;  
 MW501089;Lepidoptera;Argynnis paphia;Argynnis paphia;1;Argynnis paphia;0.99999991389927;  
 MW501091;Lepidoptera;Agriades optilete;Agriades optilete;1;Agriades optilete;0.9999999864568;  
 MW501093;Lepidoptera;Gonepteryx rhamni;NA;0.474;Gonepteryx rhamni;0.982076396127858;  
 MW501094;Lepidoptera;Coenonympha arcania;NA;0.001;NA;0.99999999999962;  
 MW501098;Lepidoptera;Satyrus ferula;Satyrus ferula;0.001;Satyrus ferula;0.992107254386621;  
 MW501099;Lepidoptera;Pieris napi;NA;0.028;Pieris napi;0.888205720664699;  
 MW501102;Lepidoptera;Polyommatus escheri;Polyommatus escheri;1;Polyommatus escheri;0.999961302886345;  
 MW501105;Lepidoptera;Boloria dia;Boloria dia;1;Boloria dia;0.99999999980503;  
 MW501108;Lepidoptera;Thymelicus sylvestris;Thymelicus sylvestris;1;Thymelicus sylvestris;0.99999981568351;  
 MW501109;Lepidoptera;Coenonympha pamphilus;Coenonympha pamphilus;1;Coenonympha pamphilus;0.99999999999744;  
 MW501110;Lepidoptera;Polyommatus icarus;NA;0.001;Polyommatus icarus;0.992224197990874;  
 MW501111;Lepidoptera;Erebia pharte;Erebia pharte;1;Erebia pharte;0.9999999630495;  
 MW501112;Lepidoptera;Oeneis glacialis;NA;NA;Oeneis glacialis;0.894225823747824;  
 MW501115;Lepidoptera;Thymelicus sylvestris;Thymelicus sylvestris;1;Thymelicus sylvestris;0.999999987317608;  
 MW501118;Lepidoptera;Ochlodes sylvanus;NA;0.316;Ochlodes sylvanus;0.996318754838625;  
 MW501120;Lepidoptera;Lycaena tityrus;Lycaena tityrus;1;Lycaena tityrus;0.999998928238034;



MW501125;Lepidoptera;Aphantopus hyperantus;Aphantopus hyperantus;0.003;Aphantopus hyperantus;0.999999455871523;  
MW501126;Lepidoptera;Plebejus idas;NA;0.001;NA;0.999576342281047;  
MW501127;Lepidoptera;Erebia ottomana;Erebia ottomana;1;Erebia ottomana;0.999999994283371;  
MW501128;Lepidoptera;Euphydryas aurinia;NA;0.31;Euphydryas aurinia;0.993387708761386;  
MW501129;Lepidoptera;Lycaena phlaeas;Lycaena phlaeas;1;Lycaena phlaeas;0.999999996363186;  
MW501130;Lepidoptera;Argynnis paphia;Argynnis paphia;1;Argynnis paphia;0.999999989469472;  
MW501131;Lepidoptera;Aricia artaxerxes;NA;0.394;Aricia artaxerxes;0.999502890976379;  
MW501132;Lepidoptera;Vanessa cardui;Vanessa cardui;1;Vanessa cardui;0.999999459983318;  
MW501134;Lepidoptera;Euphydryas intermedia;NA;NA;NA;0.99999999996973;  
MW501135;Lepidoptera;Boloria thore;Boloria thore;1;Boloria thore;0.99999998359726;  
MW501136;Lepidoptera;Pyrgus alveus;NA;0.001;Pyrgus alveus;0.895717077105177;  
MW501137;Lepidoptera;Erebia pandrose;Erebia pandrose;0.998;Erebia pandrose;0.997117103851311;  
MW501140;Lepidoptera;Euphydryas maturna;NA;NA;Euphydryas maturna;0.957925789833158;  
MW501144;Lepidoptera;Brenthis ino;Brenthis ino;0.007;Brenthis ino;0.977157381961834;  
MW501145;Lepidoptera;Pyrgus warrenensis;NA;0.003;NA;0.99999999997732;  
MW501148;Lepidoptera;Lycaena dispar;Lycaena dispar;1;Lycaena dispar;0.99999992566444;  
MW501149;Lepidoptera;Colias palaeno;NA;0.002;NA;0.99999999983681;  
MW501150;Lepidoptera;Pyrgus andromedae;Pyrgus andromedae;0.001;Pyrgus andromedae;0.998828669843251;  
MW501153;Lepidoptera;Satyrium spini;Satyrium spini;1;Satyrium spini;0.999999050552016;  
MW501154;Lepidoptera;Carcharodus alceae;Carcharodus alceae;0.01;Carcharodus alceae;0.999999990597587;  
MW501155;Lepidoptera;Polyommatus thersites;NA;0.086;Polyommatus thersites;0.999997836530961;  
MW501156;Lepidoptera;Polyommatus dorylas;Polyommatus dorylas;0.008;Polyommatus dorylas;0.991281865899703;  
MW501160;Lepidoptera;Fabriciana adippe;NA;NA;Fabriciana adippe;0.900255826442102;  
MW501162;Lepidoptera;Thymelicus lineola;Thymelicus lineola;0.992;Thymelicus lineola;0.999979112020148;  
MW501163;Lepidoptera;Araschnia levana;Araschnia levana;1;Araschnia levana;0.999999772187832;  
MW501164;Lepidoptera;Cupido minimus;NA;0.001;Cupido minimus;0.998689986467407;  
MW501165;Lepidoptera;Gonepteryx cleopatra;Gonepteryx cleopatra;0.998;Gonepteryx cleopatra;0.999118636582266;  
MW501169;Lepidoptera;Euphydryas aurinia;NA;0.31;Euphydryas aurinia;0.993387708761386;  
MW501171;Lepidoptera;Aphantopus hyperantus;Aphantopus hyperantus;0.003;Aphantopus hyperantus;0.999999455871523;  
MW501176;Lepidoptera;Brenthis ino;Brenthis ino;1;Brenthis ino;0.995903086085865;  
MW501184;Lepidoptera;Boloria euphrosyne;Boloria euphrosyne;NA;Boloria euphrosyne;0.999961725983339;  
MW501186;Lepidoptera;Polyommatus dorylas;Polyommatus dorylas;0.008;Polyommatus dorylas;0.991281865899703;  
MW501191;Lepidoptera;Erebia ottomana;Erebia ottomana;1;Erebia ottomana;0.999999994283371;  
MW501194;Lepidoptera;Melitaea nevadensis;NA;0.001;NA;0.99999999896095;  
MW501196;Lepidoptera;Oeneis glacialis;NA;NA;Oeneis glacialis;0.894225823747824;  
MW501197;Lepidoptera;Erebia montana;Erebia montana;1;Erebia montana;0.99978250115925;  
MW501199;Lepidoptera;Thymelicus acteon;Thymelicus acteon;1;Thymelicus acteon;0.99999996401357;  
MW501201;Lepidoptera;Lycaena virgaureae;NA;0.073;Lycaena virgaureae;0.9995563158025;  
MW501202;Lepidoptera;Heteropterus morpheus;NA;NA;Heteropterus morpheus;0.999999999999943;  
MW501204;Lepidoptera;Melitaea diamina;NA;0.13;Melitaea diamina;0.999999982010166;  
MW501205;Lepidoptera;Hipparchia hermione;Hipparchia hermione;1;Hipparchia hermione;0.999962890571594;  
MW501210;Lepidoptera;Erebia medusa;NA;0.04;Erebia medusa;0.984042649596477;  
MW501213;Lepidoptera;Anthocharis damone;Anthocharis damone;1;Anthocharis damone;0.999995545638599;  
MW501214;Lepidoptera;Polyommatus dorylas;Polyommatus dorylas;0.008;Polyommatus dorylas;0.991281865899703;  
MW501217;Lepidoptera;Polyommatus amandus;Polyommatus amandus;0.034;Polyommatus amandus;0.999947119111548;  
MW501218;Lepidoptera;Chazara briseis;Chazara briseis;0.001;Chazara briseis;0.999989797071389;  
MW501220;Lepidoptera;Erebia styx;NA;NA;Erebia styx;0.900873106463349;  
MW501221;Lepidoptera;Maniola jurtina;NA;0.012;Maniola jurtina;0.91755716175482;  
MW501222;Lepidoptera;Boloria thore;Boloria thore;1;Boloria thore;0.999999995669583;  
MW501224;Lepidoptera;Boloria pales;Boloria pales;1;Boloria pales;0.99847060885702;  
MW501226;Lepidoptera;Melitaea diamina;NA;0.149;Melitaea diamina;0.99999996592464;  
MW501227;Lepidoptera;Aricia agestis;NA;0.253;Aricia agestis;0.996350017387504;  
MW501229;Lepidoptera;Melitaea didyma;Melitaea didyma;1;Melitaea didyma;0.99461222008101;  
MW501230;Lepidoptera;Erebia nivalis;NA;NA;NA;0.999999999999947;  
MW501231;Lepidoptera;Lycaena hippothoe;NA;NA;Lycaena hippothoe;0.928973453460131;  
MW501232;Lepidoptera;Hipparchia fagi;NA;NA;Hipparchia fagi;0.958995850164169;  
MW501234;Lepidoptera;Hamearis lucina;NA;NA;Hamearis lucina;0.999999999972005;  
MW501237;Lepidoptera;Cupido argiades;NA;0.489;NA;0.999999999988685;  
MW501238;Lepidoptera;Pyrgus malvoides;NA;0.067;Pyrgus malvoides;0.959391728838034;  
MW501239;Lepidoptera;Aphantopus hyperantus;Aphantopus hyperantus;0.002;Aphantopus hyperantus;0.999999300149444;  
MW501241;Lepidoptera;Erebia euryale;NA;NA;Erebia euryale;0.889230517271439;  
MW501242;Lepidoptera;Lycaena hippothoe;NA;NA;Lycaena hippothoe;0.929268253497542;  
MW501243;Lepidoptera;Nymphalis c-album;NA;0.215;NA;0.999999192918557;  
MW501244;Lepidoptera;Euphydryas aurinia;NA;0.106;Euphydryas aurinia;0.993939072040577;

MW501246;Lepidoptera;Melanargia galathea;Melanargia galathea;NA;Melanargia galathea;0.959429932872284;  
MW501247;Lepidoptera;Maniola jurtina;NA;0.012;Maniola jurtina;0.91755716175482;  
MW501248;Lepidoptera;Argynnis aglaja;NA;NA;NA;0.99999999998051;  
MW501250;Lepidoptera;Hipparchia fagi;NA;NA;Hipparchia fagi;0.942857264035062;  
MW501252;Lepidoptera;Boloria pales;Boloria pales;0.002;Boloria pales;0.997115970987229;  
MW501254;Lepidoptera;Erebia oeme;Erebia oeme;NA;Erebia oeme;0.999999999728857;  
MW501255;Lepidoptera;Colias alfacariensis;Colias alfacariensis;1;Colias alfacariensis;0.999918958375424;  
MW501257;Lepidoptera;Melanargia galathea;NA;NA;Melanargia galathea;0.943593560237409;  
MW501258;Lepidoptera;Cyaniris semiargus;NA;NA;Cyaniris semiargus;0.999051841766953;  
MW501259;Lepidoptera;Boloria titania;Boloria titania;0.001;Boloria titania;0.999769261788493;  
MW501260;Lepidoptera;Cupido alcetas;Cupido alcetas;0.999;Cupido alcetas;0.995696397591104;  
MW501265;Lepidoptera;Euphydryas cynthia;Euphydryas cynthia;1;Euphydryas cynthia;0.999999243242402;  
MW501267;Lepidoptera;Celastrina argiolus;Celastrina argiolus;1;Celastrina argiolus;0.999527385150531;  
MW501269;Lepidoptera;Coenonympha corinna;Coenonympha corinna;0.999;Coenonympha corinna;0.999999236639646;  
MW501271;Lepidoptera;Erebia pharte;Erebia pharte;1;Erebia pharte;0.999999998047855;  
MW501276;Lepidoptera;Maniola jurtina;NA;0.012;Maniola jurtina;0.91755716175482;  
MW501277;Lepidoptera;Pyrgus warrenensis;NA;NA;NA;0.99999999995618;  
MW501278;Lepidoptera;Melitaea diamina;NA;0.149;Melitaea diamina;0.999999996592464;  
MW501279;Lepidoptera;Plebejus argyrognomon;NA;0.001;NA;0.994620093546684;  
MW501280;Lepidoptera;Lysandra coridon;NA;NA;NA;0.999964713520211;  
MW501281;Lepidoptera;Melitaea cinxia;Melitaea cinxia;0.01;Melitaea cinxia;0.99999999999858;  
MW501283;Lepidoptera;Fabriciana niobe;NA;0.005;Fabriciana niobe;0.992125835358755;  
MW501286;Lepidoptera;Boloria pales;Boloria pales;0.999;Boloria pales;0.991841418975145;  
MW501288;Lepidoptera;Aricia artaxerxes;NA;0.393;Aricia artaxerxes;0.998927257507897;  
MW501290;Lepidoptera;Coenonympha oedippus;Coenonympha oedippus;1;Coenonympha oedippus;0.999999999999119;  
MW501294;Lepidoptera;Brintesia circe;Brintesia circe;1;Brintesia circe;0.99999969821626;  
MW501295;Lepidoptera;Argynnis aglaja;NA;NA;Speyeria aglaja;0.872991147917853;  
MW501296;Lepidoptera;Boloria selene;NA;0.281;Boloria selene;0.999999606392712;  
MW501297;Lepidoptera;Agriades optilete;Agriades optilete;1;Agriades optilete;0.99999999183251;  
MW501301;Lepidoptera;Pyrgus armoricanus;Pyrgus armoricanus;1;Pyrgus armoricanus;0.997478680096412;  
MW501305;Lepidoptera;Pieris napi;NA;0.028;Pieris napi;0.888205720664699;  
MW501308;Lepidoptera;Aphantopus hyperantus;Aphantopus hyperantus;0.003;Aphantopus hyperantus;0.999999455871523;  
MW501309;Lepidoptera;Pyrgus alveus;NA;NA;Pyrgus alveus;0.902591602214502;  
MW501310;Lepidoptera;Erebia euryale;NA;NA;Erebia euryale;0.919518760623792;  
MW501312;Lepidoptera;Hipparchia hermione;NA;NA;NA;0.99999999999995;  
MW501315;Lepidoptera;Colias alfacariensis;Colias alfacariensis;0.001;Colias alfacariensis;0.999966522684745;  
MW501316;Lepidoptera;Colias hyale;Colias hyale;0.015;Colias hyale;0.999997884296128;  
MW501317;Lepidoptera;Pyrgus malvae;Pyrgus malvae;NA;Pyrgus malvae;0.983561287236945;  
MW501318;Lepidoptera;Lampides boeticus;Lampides boeticus;1;Lampides boeticus;0.99999999876789;  
MW501319;Lepidoptera;Pyrgus carthami;Pyrgus carthami;1;Pyrgus carthami;0.999995592447668;  
MW501326;Lepidoptera;Hipparchia hermione;NA;NA;NA;0.999999999999991;  
MW501328;Lepidoptera;Apatura ilia;NA;0.014;Apatura ilia;0.975165619919676;  
MW501330;Lepidoptera;Colias crocea;NA;0.018;NA;0.999999999999258;  
MW501331;Lepidoptera;Polyommatus damon;Polyommatus damon;1;Polyommatus damon;0.999999888141907;  
MW501333;Lepidoptera;Polyommatus thersites;NA;0.019;Polyommatus thersites;0.999997614558399;  
MW501336;Lepidoptera;Melitaea didyma;Melitaea didyma;1;Melitaea didyma;0.992381187791109;  
MW501338;Lepidoptera;Cupido agriades;NA;0.499;NA;0.999999999984682;  
MW501339;Lepidoptera;Aphantopus hyperantus;Aphantopus hyperantus;0.039;Aphantopus hyperantus;0.999996159594714;  
MW501340;Lepidoptera;Satyrus ferula;Satyrus ferula;0.001;Satyrus ferula;0.992107254386621;  
MW501341;Lepidoptera;Boloria thore;Boloria thore;1;Boloria thore;0.99999997947043;  
MW501345;Lepidoptera;Erebia pandrose;Erebia pandrose;0.998;Erebia pandrose;0.997117103851311;  
MW501347;Lepidoptera;Brintesia circe;Brintesia circe;1;Brintesia circe;0.999999566571953;  
MW501348;Lepidoptera;Erebia styx;NA;NA;Erebia styx;0.962664978932439;  
MW501350;Lepidoptera;Hipparchia leighebi;Hipparchia leighebi;0.002;Hipparchia leighebi;0.856866627382455;  
MW501351;Lepidoptera;Pyrgus sidae;Pyrgus sidae;1;Pyrgus sidae;0.999981962201329;  
MW501353;Lepidoptera;Euphydryas aurinia;NA;0.052;Euphydryas aurinia;0.99580238218755;  
MW501355;Lepidoptera;Maniola jurtina;NA;0.001;Maniola jurtina;0.939220105860875;  
MW501356;Lepidoptera;Euphydryas intermedia;Euphydryas iduna;NA;Euphydryas iduna;0.816738704456442;  
MW501357;Lepidoptera;Plebejus idas;NA;0.007;NA;0.999546324331549;  
MW501358;Lepidoptera;Fabriciana adippe;Fabriciana adippe;0.028;Fabriciana adippe;0.969769198942097;  
MW501359;Lepidoptera;Thymelicus lineola;Thymelicus lineola;1;Thymelicus lineola;0.999995927238524;  
MW501364;Lepidoptera;Chazara briseis;Chazara briseis;0.002;Chazara briseis;0.999942072582126;  
MW501368;Lepidoptera;Boloria euphrosyne;Boloria euphrosyne;0.999;Boloria euphrosyne;0.999990576157994;

MW501371;Lepidoptera;Erebia medusa;NA;0.04;Erebia medusa;0.984042649596477;  
MW501372;Lepidoptera;Colias hyale;Colias hyale;0.015;Colias hyale;0.999997884296128;  
MW501374;Lepidoptera;Helleia helle;Lycaena helle;1;Lycaena helle;0.99999993533947;  
MW501375;Lepidoptera;Fabriciana adippe;Fabriciana adippe;0.011;Fabriciana  
adippe;0.992187773497179;  
MW501379;Lepidoptera;Erebia pronoe;Erebia pronoe;0.001;Erebia pronoe;0.999412757816713;  
MW501380;Lepidoptera;Gonepteryx rhamni;NA;0.181;Gonepteryx rhamni;0.985430786358543;  
MW501383;Lepidoptera;Lampides boeticus;Lampides boeticus;NA;Lampides boeticus;0.99999979201277;  
MW501384;Lepidoptera;Maniola jurtina;NA;NA;Maniola jurtina;0.746095236282775;  
MW501385;Lepidoptera;Coenonympha oedippus;Coenonympha oedippus;1;Coenonympha  
oedippus;0.999999999999886;  
MW501386;Lepidoptera;Fabriciana adippe;NA;NA;Fabriciana adippe;0.900255826442102;  
MW501387;Lepidoptera;Erebia euryale;NA;NA;Erebia euryale;0.919518760623792;  
MW501388;Lepidoptera;Boloria euphrosyne;Boloria euphrosyne;1;Boloria  
euphrosyne;0.999998514406196;  
MW501390;Lepidoptera;Pyrgus alveus;NA;0.003;NA;0.999999999997732;  
MW501391;Lepidoptera;Erebia nivalis;NA;NA;NA;0.999999999999947;  
MW501393;Lepidoptera;Lysandra coridon;NA;NA;NA;0.998346382460118;  
MW501394;Lepidoptera;Lycaena phlaeas;Lycaena phlaeas;1;Lycaena phlaeas;0.999999996363186;  
MW501395;Lepidoptera;Aglais urticae;NA;0.001;Aglais urticae;0.983873948702153;  
MW501396;Lepidoptera;Cyaniris semiargus;NA;NA;Cyaniris semiargus;0.997755603010786;  
MW501397;Lepidoptera;Colias hyale;NA;0.488;Colias hyale;0.999915488936852;  
MW501398;Lepidoptera;Maniola jurtina;NA;0.001;Maniola jurtina;0.939220105860875;  
MW501399;Lepidoptera;Thecla betulae;Thecla betulae;1;Thecla betulae;0.99999999972886;  
MW501402;Lepidoptera;Erebia ottomana;Erebia ottomana;1;Erebia ottomana;0.99999994283371;  
MW501403;Lepidoptera;Coenonympha rhodopensis;NA;0.004;Coenonympha rhodopensis;0.923784712175037;  
MW501404;Lepidoptera;Carterocephalus palaemon;Carterocephalus palaemon;0.016;Carterocephalus  
palaemon;0.930544560040029;  
MW501405;Lepidoptera;Anthocharis cardamines;Anthocharis cardamines;1;Anthocharis  
cardamines;0.999999940675226;  
MW501406;Lepidoptera;Pyrgus alveus;NA;NA;Pyrgus alveus;0.902591602214502;  
MW501409;Lepidoptera;Boloria euphrosyne;Boloria euphrosyne;0.001;Boloria  
euphrosyne;0.999985640170951;  
MW501413;Lepidoptera;Melitaea nevadensis;NA;NA;NA;0.99999999828008;  
MW501417;Lepidoptera;Cupido osiris;Cupido osiris;1;Cupido osiris;0.999962698770249;  
MW501421;Lepidoptera;Erebia oeme;Erebia oeme;NA;Erebia oeme;0.99999999683894;  
MW501424;Lepidoptera;Pyrgus armoricanus;Pyrgus armoricanus;1;Pyrgus  
armoricanus;0.997478680096412;  
MW501425;Lepidoptera;Erebia melampus;Erebia melampus;0.011;Erebia melampus;0.975499903768874;  
MW501426;Lepidoptera;Erebia oeme;NA;0.307;Erebia oeme;0.99999999792692;  
MW501427;Lepidoptera;Nymphalis antiopa;NA;0.23;Nymphalis antiopa;0.999999944198096;  
MW501428;Lepidoptera;Polyommatus amandus;Polyommatus amandus;0.006;Polyommatus  
amandus;0.999937961101069;  
MW501430;Lepidoptera;Plebejus argyrognomon;NA;0.001;NA;0.994620093546684;  
MW501431;Lepidoptera;Plebejus argus;NA;0.328;Plebejus argus;0.969789734199889;  
MW501434;Lepidoptera;Coenonympha arcania;NA;0.001;NA;0.999999999999988;  
MW501437;Lepidoptera;Carcharodus alceae;Carcharodus alceae;0.004;Carcharodus  
alceae;0.999999979585084;  
MW501440;Lepidoptera;Colias alfacariensis;Colias alfacariensis;0.001;Colias  
alfacariensis;0.999926026317526;  
MW501443;Lepidoptera;Thymelicus sylvestris;NA;0.131;Thymelicus sylvestris;0.999961574491035;  
MW501444;Lepidoptera;Melitaea varia;Melitaea varia;1;Melitaea varia;0.999999191822283;  
MW501445;Lepidoptera;Aricia artaxerxes;Plebejus argus;1;Aricia artaxerxes;0.999743187199922;  
MW501446;Lepidoptera;Colias alfacariensis;Colias alfacariensis;1;Colias  
alfacariensis;0.999986994131001;  
MW501449;Lepidoptera;Plebejus argus;NA;0.036;Plebejus argus;0.988160277018267;  
MW501451;Lepidoptera;Erebia montana;Erebia montana;0.999;Erebia montana;0.997589557700034;  
MW501452;Lepidoptera;Melitaea diamina;NA;0.149;Melitaea diamina;0.99999996592464;  
MW501453;Lepidoptera;Ochlodes sylvanus;NA;0.316;Ochlodes sylvanus;0.996318754838625;  
MW501455;Lepidoptera;Plebejus argus;NA;0.123;Plebejus argus;0.980927835351298;  
MW501456;Lepidoptera;Plebejus idas;NA;0.002;NA;0.999495069424624;  
MW501457;Lepidoptera;Colias crocea;NA;0.059;NA;0.999999999999738;  
MW501458;Lepidoptera;Erebia medusa;NA;0.04;Erebia medusa;0.984042649596477;  
MW501459;Lepidoptera;Hipparchia semele;NA;0.001;Hipparchia semele;0.751676363517843;  
MW501460;Lepidoptera;Vanessa atalanta;Vanessa atalanta;1;Vanessa atalanta;0.99999999570178;  
MW501461;Lepidoptera;Euphydryas cynthia;Euphydryas cynthia;1;Euphydryas  
cynthia;0.999998812102883;  
MW501463;Lepidoptera;Pyrgus armoricanus;Pyrgus armoricanus;1;Pyrgus  
armoricanus;0.999989012351076;  
MW501467;Lepidoptera;Erebia ottomana;Erebia ottomana;1;Erebia ottomana;0.999999994283371;  
MW501468;Lepidoptera;Thymelicus sylvestris;NA;0.131;Thymelicus sylvestris;0.999961574491035;  
MW501469;Lepidoptera;Lampides boeticus;Lampides boeticus;1;Lampides boeticus;0.99999999545906;  
MW501470;Lepidoptera;Carcharodus lavatherae;NA;0.35;Carcharodus lavatherae;0.997691209312751;  
MW501471;Lepidoptera;Hipparchia semele;NA;0.002;Hipparchia semele;0.784603069619426;  
MW501472;Lepidoptera;Euphydryas aurinia;NA;0.106;Euphydryas aurinia;0.993939072040577;  
MW501473;Lepidoptera;Erebia pluto;Erebia pluto;1;Erebia pluto;0.999999977588772;  
MW501474;Lepidoptera;Boloria pales;Boloria pales;1;Boloria pales;0.998012625949176;  
MW501478;Lepidoptera;Cyaniris semiargus;NA;NA;Cyaniris semiargus;0.99903926220317;

MW501479;Lepidoptera;Hipparchia semele;NA;0.008;Hipparchia semele;0.74726780401631;  
 MW501480;Lepidoptera;Pyrgus cacaliae;Pyrgus cacaliae;0.001;Pyrgus cacaliae;0.99354498208327;  
 MW501484;Lepidoptera;Lycaena thersamon;NA;NA;Lycaena thersamon;0.933284272031275;  
 MW501487;Lepidoptera;Boloria selene;NA;0.281;Boloria selene;0.999999606392712;  
 MW501488;Lepidoptera;Cyraniris semiargus;NA;NA;Cyraniris semiargus;0.99903926220317;  
 MW501490;Lepidoptera;Agriades glandon;NA;0.002;Agriades glandon;0.987189585708506;  
 MW501492;Lepidoptera;Nymphalis c-album;NA;0.215;NA;0.999999192918557;  
 MW501493;Lepidoptera;Lasiommata maera;Lasiommata maera;1;Lasiommata maera;0.999995617120616;  
 MW501494;Lepidoptera;Lycaena phlaeas;Lycaena phlaeas;1;Lycaena phlaeas;0.99999995549445;  
 MW501495;Lepidoptera;Boloria pales;Boloria pales;0.972;Boloria pales;0.997434826494683;  
 MW501499;Lepidoptera;Vanessa atalanta;Vanessa atalanta;1;Vanessa atalanta;0.99999999757762;  
 MW501500;Lepidoptera;Erebia pluto;Erebia pluto;1;Erebia pluto;0.999999977588772;  
 MW501503;Lepidoptera;Boloria pales;Boloria pales;1;Boloria pales;0.998449922907236;  
 MW501504;Lepidoptera;Polyommatus escheri;Polyommatus escheri;1;Polyommatus escheri;0.99952448350567;  
 MW501509;Lepidoptera;Coenonympha pamphilus;Coenonympha pamphilus;1;Coenonympha pamphilus;0.99999999999034;  
 MW501515;Lepidoptera;Erebia medusa polaris;NA;0.002;Erebia medusa;0.977034361887105;  
 MW501517;Lepidoptera;Euphydryas maturna;NA;0.135;Euphydryas maturna;0.871258387000532;  
 MW501520;Lepidoptera;Lysandra coridon;NA;NA;Lysandra coridon;0.754269905766234;  
 MW501521;Lepidoptera;Melitaea nevadensis;NA;0.591;Melitaea celadussa;0.932869887229099;  
 MW501522;Lepidoptera;Melanargia galathea;Melanargia galathea;NA;Melanargia galathea;0.981855578470499;  
 MW501526;Lepidoptera;Boloria euphrosyne;Boloria euphrosyne;0.001;Boloria euphrosyne;0.99985640170951;  
 MW501528;Lepidoptera;Hipparchia fagi;NA;NA;Hipparchia fagi;0.882395021352844;  
 MW501530;Lepidoptera;Erebia ottomana;Erebia ottomana;1;Erebia ottomana;0.999999994283371;  
 MW501531;Lepidoptera;Erebia epiphron;NA;NA;Erebia epiphron;0.994401488812176;  
 MW501532;Lepidoptera;Erebia tyndarus;NA;NA;NA;0.99999999999888;  
 MW501533;Lepidoptera;Colias alfacariensis;Colias alfacariensis;0.001;Colias alfacariensis;0.999926026317526;  
 MW501535;Lepidoptera;Boloria euphrosyne;Boloria euphrosyne;1;Boloria euphrosyne;0.99998824779231;  
 MW501537;Lepidoptera;Polyommatus eros;NA;0.001;Polyommatus eros;0.863598753993334;  
 MW501539;Lepidoptera;Aricia eumedon;Eumedonia eumedon;0.035;Eumedonia eumedon;0.951537993183145;  
 MW501540;Lepidoptera;Celastrina argiolus;Celastrina argiolus;1;Celastrina argiolus;0.999708846309046;  
 MW501541;Lepidoptera;Erebia manto;NA;NA;Erebia manto;0.999021390463069;  
 MW501542;Lepidoptera;Brintesia circe;Brintesia circe;NA;Brintesia circe;0.999998981082378;  
 MW501543;Lepidoptera;Brenthis daphne;Brenthis daphne;0.003;Brenthis daphne;0.996075620503523;  
 MW501544;Lepidoptera;Colias hyale;Colias hyale;0.015;Colias hyale;0.999997884296128;  
 MW501545;Lepidoptera;Thymelicus sylvestris;NA;0.324;Thymelicus sylvestris;0.999940778442454;  
 MW501548;Lepidoptera;Minois dryas;NA;0.025;Minois dryas;0.850746026247397;  
 MW501549;Lepidoptera;Limenitis populi;Limenitis populi;1;Limenitis populi;0.99999999859654;  
 MW501552;Lepidoptera;Thymelicus sylvestris;NA;0.449;Thymelicus sylvestris;0.999894356947312;  
 MW501557;Lepidoptera;Brenthis ino;Brenthis ino;1;Brenthis ino;0.997823940101957;  
 MW501566;Lepidoptera;Parnassius apollo;Parnassius apollo;NA;Parnassius apollo;0.99956833515036;  
 MW501568;Lepidoptera;Erebia montana;Erebia montana;1;Erebia montana;0.99905080170195;  
 MW501570;Lepidoptera;Gonepteryx rhamni;NA;0.474;Gonepteryx rhamni;0.982076396127858;  
 MW501572;Lepidoptera;Brenthis ino;Brenthis ino;0.007;Brenthis ino;0.977157381961834;  
 MW501573;Lepidoptera;Boloria dia;Boloria dia;1;Boloria dia;0.99999999980503;  
 MW501577;Lepidoptera;Pyrgus armoricanus;Pyrgus armoricanus;1;Pyrgus armoricanus;0.997478680096412;  
 MW501581;Lepidoptera;Coenonympha rhodopensis;Coenonympha rhodopensis;0.001;Coenonympha rhodopensis;0.953917004161499;  
 MW501582;Lepidoptera;Coenonympha pamphilus;Coenonympha pamphilus;1;Coenonympha pamphilus;0.99999999999744;  
 MW501583;Lepidoptera;Carcharodus lavatherae;NA;0.328;Carcharodus lavatherae;0.997593068316852;  
 MW501585;Lepidoptera;Gonepteryx rhamni;NA;0.474;Gonepteryx rhamni;0.982076396127858;  
 MW501586;Lepidoptera;Nymphalis antiopa;NA;0.23;Nymphalis antiopa;0.999999944198096;  
 MW501587;Lepidoptera;Lycaena phlaeas;Lycaena phlaeas;1;Lycaena phlaeas;0.999999996363186;  
 MW501589;Lepidoptera;Colias phicomone;NA;NA;Colias phicomone;0.984215174181133;  
 MW501590;Lepidoptera;Lycaena dispar;Lycaena dispar;1;Lycaena dispar;0.99999990743959;  
 MW501591;Lepidoptera;Polyommatus icarus;NA;0.001;Polyommatus icarus;0.971665478142064;  
 MW501593;Lepidoptera;Polyommatus icarus;NA;0.001;Polyommatus icarus;0.974455446201716;  
 MW501598;Lepidoptera;Polyommatus damon;Polyommatus damon;1;Polyommatus damon;0.999999890455973;  
 MW501599;Lepidoptera;Lysandra coridon;NA;NA;Lysandra coridon;0.754269905766234;  
 MW501602;Lepidoptera;Araschnia levana;Araschnia levana;1;Araschnia levana;0.99999844800511;  
 MW501603;Lepidoptera;Melitaea didyma;Melitaea didyma;1;Melitaea didyma;0.992943754810873;  
 MW501604;Lepidoptera;Colias palaeno;NA;0.002;NA;0.99999999983681;  
 MW501606;Lepidoptera;Maniola jurtina;NA;0.038;NA;0.99999999999524;  
 MW501611;Lepidoptera;Cercyonis lupina;Hyponephele lupina;1;Hyponephele lupina;0.999999979579656;  
 MW501613;Lepidoptera;Pieris napi;NA;NA;Pieris napi;0.910318243638768;  
 MW501614;Lepidoptera;Melitaea diamina;NA;0.13;Melitaea diamina;0.999999982010166;  
 MW501616;Lepidoptera;Coenonympha rhodopensis;NA;0.004;Coenonympha rhodopensis;0.916764171576463;  
 MW501617;Lepidoptera;Erebia mnestra;Erebia mnestra;0.001;Erebia mnestra;0.999937560187875;  
 MW501618;Lepidoptera;Melitaea varia;Melitaea varia;1;Melitaea varia;0.999980409414883;  
 MW501619;Lepidoptera;Pyrgus cacaliae;Pyrgus cacaliae;0.001;Pyrgus cacaliae;0.997779968725098;

MW501621;Lepidoptera;Satyrium pruni;NA;0.076;Satyrium pruni;0.990322364021655;  
MW501622;Lepidoptera;Melitaea britomartis;Melicta britomartis;1;Melitaea  
britomartis;0.945754571752602;  
MW501623;Lepidoptera;Boloria selene;NA;0.281;Boloria selene;0.999999606392712;  
MW501625;Lepidoptera;Helleia helle;Lycaena helle;1;Lycaena helle;0.99999993533947;  
MW501626;Lepidoptera;Lampides boeticus;Lampides boeticus;1;Lampides boeticus;0.99999999545906;  
MW501627;Lepidoptera;Melitaea nevadensis;NA;0.006;Melitaea celadussa;0.725734336654251;  
MW501630;Lepidoptera;Brenthis daphne;Brenthis daphne;0.001;Brenthis daphne;0.996507704816856;  
MW501631;Lepidoptera;Coenonympha oedippus;Coenonympha oedippus;1;Coenonympha  
oedippus;0.99999999999972;  
MW501633;Lepidoptera;Erebia tyndarus;NA;NA;NA;0.99999999999923;  
MW501636;Lepidoptera;Erebia styx;NA;NA;Erebia styx;0.965933579844899;  
MW501637;Lepidoptera;Agriades glandon;NA;0.002;Agriades glandon;0.971948202527677;  
MW501638;Lepidoptera;Satyrium acaciae;Satyrium acaciae;1;Satyrium acaciae;0.999999951077798;  
MW501642;Lepidoptera;Erebia nivalis;NA;NA;NA;0.999999999999947;  
MW501643;Lepidoptera;Lycaena dispar;Lycaena dispar;1;Lycaena dispar;0.999999990743959;  
MW501644;Lepidoptera;Limenitis camilla;NA;0.03;Limenitis camilla;0.999963749201123;  
MW501649;Lepidoptera;Erebia pronoe;Erebia pronoe;0.001;Erebia pronoe;0.999412757816713;  
MW501650;Lepidoptera;Satyrium w-album;NA;0.056;Satyrium w-album;0.989378230996316;  
MW501651;Lepidoptera;Aricia agestis;NA;0.246;Aricia agestis;0.989888047553269;  
MW501652;Lepidoptera;Agriades optilete;Agriades optilete;1;Agriades optilete;0.999999982563736;  
MW501653;Lepidoptera;Polyommatus icarus;NA;0.001;Polyommatus icarus;0.971665478142064;  
MW501654;Lepidoptera;Argynnis paphia;Argynnis paphia;1;Argynnis paphia;0.99999991389927;  
MW501655;Lepidoptera;Plebejus argyrognomon;NA;0.001;NA;0.994620093546684;  
MW501656;Lepidoptera;Boloria thore;Boloria thore;1;Boloria thore;0.99999998329827;  
MW501658;Lepidoptera;Cupido argiades;NA;0.499;NA;0.99999999984682;  
MW501661;Lepidoptera;Anthocharis cardamines;Anthocharis cardamines;1;Anthocharis  
cardamines;0.999999940675226;  
MW501662;Lepidoptera;Lycaena hippothoe;Lycaena hippothoe;NA;Lycaena hippothoe;0.992590719724828;  
MW501665;Lepidoptera;Melitaea nevadensis;NA;0.032;NA;0.99999999959213;  
MW501667;Lepidoptera;Pieris napi;NA;0.028;Pieris napi;0.888205720664699;  
MW501669;Lepidoptera;Thymelicus sylvestris;NA;0.324;Thymelicus sylvestris;0.999940778442454;  
MW501675;Lepidoptera;Boloria dia;Boloria dia;1;Boloria dia;0.99999999980503;  
MW501677;Lepidoptera;Melitaea didyma;Melitaea didyma;0.001;Melitaea didyma;0.989540662318705;  
MW501678;Lepidoptera;Argynnis paphia;Argynnis paphia;1;Argynnis paphia;0.99999991389927;  
MW501681;Lepidoptera;Boloria graeca;Boloria graeca;1;Boloria graeca;0.999999912715485;  
MW501682;Lepidoptera;Carterocephalus palaemon;NA;0.052;Carterocephalus  
palaemon;0.728445051795325;  
MW501683;Lepidoptera;Erebia pandrose;Erebia pandrose;0.998;Erebia pandrose;0.997117103851311;  
MW501685;Lepidoptera;Gegenes nostrodamus;Gegenes nostrodamus;1;Gegenes  
nostrodamus;0.999999998531905;  
MW501686;Lepidoptera;Erebia montana;Erebia montana;1;Erebia montana;0.99905080170195;  
MW501687;Lepidoptera;Satyrium w-album;NA;0.238;Satyrium w-album;0.828701501356823;  
MW501688;Lepidoptera;Pyrgus alveus;NA;0.012;NA;0.99999999997537;  
MW501690;Lepidoptera;Cupido argiades;NA;0.499;NA;0.99999999984682;  
MW501694;Lepidoptera;Hipparchia semele;NA;0.002;Hipparchia semele;0.709178647127069;  
MW501695;Lepidoptera;Colias palaeno;NA;0.002;NA;0.99999999983681;  
MW501696;Lepidoptera;Polyommatus daphnis;NA;0.038;Polyommatus daphnis;0.987974976989058;  
MW501698;Lepidoptera;Erebia pharte;Erebia pharte;1;Erebia pharte;0.9999999630495;  
MW501699;Lepidoptera;Lycaena phlaeas;Lycaena phlaeas;1;Lycaena phlaeas;0.999999996363186;  
MW501700;Lepidoptera;Polyommatus daphnis;Polyommatus daphnis;1;Polyommatus  
daphnis;0.999889361571218;  
MW501701;Lepidoptera;Aricia eumedon;Eumedonia eumedon;0.004;Eumedonia eumedon;0.99844803714109;  
MW501703;Lepidoptera;Satyrium ilicis;Satyrium ilicis;1;Satyrium ilicis;0.999999903351754;  
MW501705;Lepidoptera;Apatura iris;Apatura iris;1;Apatura iris;0.99999999999915;  
MW501706;Lepidoptera;Coenonympha gardetta;NA;0.001;Coenonympha gardetta;0.755947323088537;  
MW501707;Lepidoptera;Pieris napi;NA;0.011;Pieris napi;0.801985394724814;  
MW501709;Lepidoptera;Agriades orbitulus;NA;0.031;Agriades orbitulus;0.998409903321215;  
MW501711;Lepidoptera;Aphantopus hyperantus;Aphantopus hyperantus;0.002;Aphantopus  
hyperantus;0.999997247581555;  
MW501712;Lepidoptera;Minois dryas;NA;0.025;Minois dryas;0.850746026247397;  
MW501713;Lepidoptera;Aglais urticae;NA;0.126;Aglais urticae;0.988445559695084;  
MW501714;Lepidoptera;Melitaea varia;Melitaea varia;1;Melitaea varia;0.99992357528001;  
MW501718;Lepidoptera;Erebia nivalis;NA;0.004;NA;0.999999999999965;  
MW501719;Lepidoptera;Fabriciana niobe;NA;0.021;Fabriciana niobe;0.988678832256576;  
MW501720;Lepidoptera;Erebia medusa;NA;0.002;Erebia medusa;0.991052367627986;  
MW501721;Lepidoptera;Carterocephalus palaemon;Carterocephalus palaemon;0.017;Carterocephalus  
palaemon;0.814739327468561;  
MW501724;Lepidoptera;Satyrium w-album;NA;0.056;Satyrium w-album;0.989378230996316;  
MW501725;Lepidoptera;Lycaena tityrus;Lycaena tityrus;1;Lycaena tityrus;0.999998928238034;  
MW501726;Lepidoptera;Euphydryas intermedia;Euphydryas iduna;NA;Euphydryas  
iduna;0.816738704456442;  
MW501728;Lepidoptera;Boloria euphrosyne;Boloria euphrosyne;1;Boloria  
euphrosyne;0.999998365644188;  
MW501730;Lepidoptera;Pyrgus alveus;NA;0.003;NA;0.99999999997732;  
MW501733;Lepidoptera;Melitaea didyma;Melitaea didyma;1;Melitaea didyma;0.992190186996279;  
MW501735;Lepidoptera;Cupido minimus;NA;0.001;Cupido minimus;0.999750390998357;

MW501736;Lepidoptera;Pyrgus armoricanus;Pyrgus armoricanus;1;Pyrgus armoricanus;0.999997353848817;  
MW501738;Lepidoptera;Agriades orbitulus;NA;0.031;Agriades orbitulus;0.998409903321215;  
MW501740;Lepidoptera;Pyrgus cacaliae;Pyrgus cacaliae;0.001;Pyrgus cacaliae;0.99354498208327;  
MW501741;Lepidoptera;Coenonympha pamphilus;Coenonympha pamphilus;1;Coenonympha pamphilus;0.99999999999744;  
MW501743;Lepidoptera;Erebia mnestra;Erebia mnestra;0.999;Erebia mnestra;0.999914506611097;  
MW501745;Lepidoptera;Pyrgus sidae;Pyrgus sidae;1;Pyrgus sidae;0.99996750457282;  
MW501746;Lepidoptera;Melitaea diamina;NA;0.149;Melitaea diamina;0.999999996592464;  
MW501747;Lepidoptera;Erebia pluto;Erebia pluto;1;Erebia pluto;0.999999921883617;  
MW501748;Lepidoptera;Minois dryas;NA;0.025;Minois dryas;0.850746026247397;  
MW501750;Lepidoptera;Plebejus argus;NA;0.125;Plebejus argus;0.977541558081126;  
MW501751;Lepidoptera;Fabriciana niobe;NA;0.001;Fabriciana niobe;0.989214650993052;  
MW501753;Lepidoptera;Colias hyale;Colias hyale;0.015;Colias hyale;0.999997884296128;  
MW501755;Lepidoptera;Favonius quercus;NA;NA;Favonius quercus;0.738637895579293;  
MW501757;Lepidoptera;Plebejus idas;NA;0.007;NA;0.999546324331549;  
MW501758;Lepidoptera;Erebia oeme;NA;NA;Erebia oeme;0.999999998493848;  
MW501759;Lepidoptera;Lycaena virgaureae;NA;0.073;Lycaena virgaureae;0.9995563158025;  
MW501760;Lepidoptera;Polyommatus amandus;Polyommatus amandus;0.005;Polyommatus amandus;0.999989914027782;  
MW501761;Lepidoptera;Cyaniris semiargus;NA;NA;Cyaniris semiargus;0.996733086367067;  
MW501762;Lepidoptera;Carterocephalus palaemon;NA;0.052;Carterocephalus palaemon;0.728445051795325;  
MW501768;Lepidoptera;Callophrys rubi;NA;0.003;Callophrys rubi;0.997328639918919;  
MW501769;Lepidoptera;Gonepteryx rhamni;NA;0.474;Gonepteryx rhamni;0.982076396127858;  
MW501770;Lepidoptera;Favonius quercus;NA;NA;NA;0.99999999997347;  
MW501772;Lepidoptera;Pyrgus malvae;Pyrgus malvae;NA;NA;Pyrgus malvae;0.988055481360344;  
MW501773;Lepidoptera;Aricia eumedon;Eumedonia eumedon;0.006;Eumedonia eumedon;0.996647121119569;  
MW501774;Lepidoptera;Coenonympha arcania;NA;0.067;Coenonympha arcania;0.978811371852141;  
MW501776;Lepidoptera;Boloria thore;Boloria thore;1;Boloria thore;0.99999846863102;  
MW501777;Lepidoptera;Argynnis aglaja;NA;NA;Speyeria aglaja;0.872991147917853;  
MW501779;Lepidoptera;Erebia medusa;NA;0.009;Erebia medusa;0.986275612856827;  
MW501782;Lepidoptera;Hipparchia fagi;NA;NA;Hipparchia fagi;0.977048494324972;  
MW501784;Lepidoptera;Aricia nicias;Aricia nicias;1;Aricia nicias;0.999937101505438;  
MW501785;Lepidoptera;Polyommatus amandus;Polyommatus amandus;0.002;Polyommatus amandus;0.99998879592523;  
MW501786;Lepidoptera;Gonepteryx rhamni;NA;0.474;Gonepteryx rhamni;0.982076396127858;  
MW501790;Lepidoptera;Aphantopus hyperantus;Aphantopus hyperantus;1;Aphantopus hyperantus;0.999998832526756;  
MW501791;Lepidoptera;Pyrgus carthami;Pyrgus carthami;1;Pyrgus carthami;0.99999339129648;  
MW501792;Lepidoptera;Nymphalis c-album;NA;0.215;NA;0.999999192918557;  
MW501795;Lepidoptera;Thymelicus sylvestris;NA;0.324;Thymelicus sylvestris;0.999940778442454;  
MW501796;Lepidoptera;Coenonympha oedippus;Coenonympha oedippus;1;Coenonympha oedippus;0.99999999999915;  
MW501797;Lepidoptera;Pieris napi;NA;0.011;Pieris napi;0.801985394724814;  
MW501798;Lepidoptera;Polyommatus damon;Polyommatus damon;1;Polyommatus damon;0.999999955141335;  
MW501800;Lepidoptera;Satyrium ilicis;Satyrium ilicis;1;Satyrium ilicis;0.99999963901758;  
MW501803;Lepidoptera;Colias palaeno;NA;0.001;NA;0.999999998626821;  
MW501804;Lepidoptera;Erebia euryale;NA;NA;Erebia euryale;0.919518760623792;  
MW501806;Lepidoptera;Agriades optilete;Agriades optilete;1;Agriades optilete;0.99999999183251;  
MW501807;Lepidoptera;Coenonympha gardetta;NA;0.001;NA;0.99999999999975;  
MW501809;Lepidoptera;Celastrina argiolus;Celastrina argiolus;1;Celastrina argiolus;0.999631157817044;  
MW501810;Lepidoptera;Colias crocea;NA;NA;NA;0.999999999999568;  
MW501814;Lepidoptera;Iolana iolas;Iolana iolas;1;Iolana iolas;0.999999410322861;  
MW501815;Lepidoptera;Erebia scipio;Erebia scipio;1;Erebia scipio;0.999999995978129;  
MW501816;Lepidoptera;Nymphalis io;NA;0.181;Aglais io;0.960115164047212;  
MW501820;Lepidoptera;Lycaena tityrus;Lycaena tityrus;1;Lycaena tityrus;0.999998928238034;  
MW501821;Lepidoptera;Pyrgus alveus;NA;0.003;NA;0.99999999997732;  
MW501822;Lepidoptera;Gonepteryx rhamni;NA;0.474;Gonepteryx rhamni;0.982076396127858;  
MW501823;Lepidoptera;Agriades glandon;NA;0.002;Agriades glandon;0.987189585708506;  
MW501824;Lepidoptera;Favonius quercus;Favonius quercus;0.002;Favonius quercus;0.996756380250499;  
MW501826;Lepidoptera;Vanessa cardui;Vanessa cardui;1;Vanessa cardui;0.999999459983318;  
MW501830;Lepidoptera;Brenthis ino;Brenthis ino;0.007;Brenthis ino;0.977157381961834;  
MW501831;Lepidoptera;Pyrgus malvae;NA;NA;Pyrgus malvae;0.984355760417278;  
MW501832;Lepidoptera;Coenonympha glycerion;NA;0.28;Coenonympha glycerion;0.999998036263913;  
MW501833;Lepidoptera;Melitaea varia;Melitaea varia;1;Melitaea varia;0.99997299635802;  
MW501836;Lepidoptera;Pyrgus armoricanus;Pyrgus armoricanus;1;Pyrgus armoricanus;0.999996862560442;  
MW501838;Lepidoptera;Erebia pandrose;Erebia pandrose;NA;Erebia pandrose;0.956509272964271;  
MW501840;Lepidoptera;Erebia melampus;Erebia melampus;0.011;Erebia melampus;0.975499903768874;  
MW501843;Lepidoptera;Aglais urticae;Aglais urticae;0.001;Aglais urticae;0.990690600684087;  
MW501844;Lepidoptera;Apatura ilia;NA;0.039;Apatura ilia;0.977274423026401;  
MW501845;Lepidoptera;Gonepteryx rhamni;NA;0.167;Gonepteryx rhamni;0.995231820374048;  
MW501846;Lepidoptera;Polyommatus eros;NA;0.005;Polyommatus eros;0.95275169203039;  
MW501847;Lepidoptera;Cupido minimus;NA;0.006;Cupido minimus;0.999768371759258;  
MW501850;Lepidoptera;Erebia montana;Erebia montana;1;Erebia montana;0.99905080170195;  
MW501853;Lepidoptera;Pieris napi;NA;0.066;Pieris napi;0.832895481558215;

MW501854;Lepidoptera;Lycaena dispar;Lycaena dispar;1;Lycaena dispar;0.999999990743959;  
MW501856;Lepidoptera;Plebejus argus;NA;0.053;Plebejus argus;0.979294740329472;  
MW501857;Lepidoptera;Cyaniris semiargus;NA;NA;Cyaniris semiargus;0.999051841766953;  
MW501858;Lepidoptera;Lycaena phlaeas;Lycaena phlaeas;1;Lycaena phlaeas;0.999999996998923;  
MW501859;Lepidoptera;Satyrium pruni;NA;0.076;Satyrium pruni;0.990322364021655;  
MW501860;Lepidoptera;Glaucopsyche alexis;Glaucopsyche alexis;0.001;Glaucopsyche alexis;0.94042380088325;  
MW501862;Lepidoptera;Melitaea cinxia;Melitaea cinxia;1;Melitaea cinxia;0.999999999999773;  
MW501865;Lepidoptera;Boloria selene;NA;0.275;Boloria selene;0.999999702697396;  
MW501866;Lepidoptera;Melitaea cinxia;Melitaea cinxia;1;Melitaea cinxia;0.999999999999631;  
MW501868;Lepidoptera;Coenonympha rhodopensis;NA;0.013;NA;1;  
MW501869;Lepidoptera;Carcharodus alceae;Carcharodus alceae;0.003;Carcharodus alceae;0.99999959808407;  
MW501870;Lepidoptera;Apatura ilia;NA;0.039;Apatura ilia;0.977274423026401;  
MW501872;Lepidoptera;Erebia stiria;NA;NA;0.99999999970959;  
MW501873;Lepidoptera;Pyrgus cacaliae;Pyrgus cacaliae;0.001;Pyrgus cacaliae;0.997779968725098;  
MW501875;Lepidoptera;Maniola jurtina;NA;0.01;NA;0.99999999998782;  
MW501876;Lepidoptera;Pyrgus andromedae;Pyrgus andromedae;0.001;Pyrgus andromedae;0.998828669843251;  
MW501879;Lepidoptera;Boloria pales;Boloria pales;0.001;Boloria pales;0.996621255514851;  
MW501882;Lepidoptera;Erebia styx;NA;NA;Erebia styx;0.871664865838723;  
MW501883;Lepidoptera;Lycaena dispar;Lycaena dispar;1;Lycaena dispar;0.999999995881126;  
MW501884;Lepidoptera;Polyommatus icarus;NA;0.001;Polyommatus icarus;0.981285528541973;  
MW501885;Lepidoptera;Pararge aegeria;Pararge aegeria;1;Pararge aegeria;0.99999999857494;  
MW501886;Lepidoptera;Anthocharis cardamines;Anthocharis cardamines;1;Anthocharis cardamines;0.999999940675226;  
MW501892;Lepidoptera;Boloria thore;Boloria thore;1;Boloria thore;0.999999841620719;  
MW501898;Lepidoptera;Euphydryas aurinia;NA;0.297;Euphydryas aurinia;0.977609698395401;  
MW501899;Lepidoptera;Hipparchia fagi;NA;NA;Hipparchia fagi;0.893591989048691;  
MW501900;Lepidoptera;Polyommatus thersites;NA;NA;Polyommatus thersites;0.999999041958266;  
MW501901;Lepidoptera;Coenonympha pamphilus;Coenonympha pamphilus;1;Coenonympha pamphilus;0.999999999998295;  
MW501903;Lepidoptera;Apatura ilia;Apatura ilia;0.014;Apatura ilia;0.990629232806476;  
MW501907;Lepidoptera;Boloria napaea;Boloria napaea;1;Boloria napaea;0.997745255839468;  
MW501908;Lepidoptera;Polyommatus icarus;NA;0.001;Polyommatus icarus;0.974455446201716;  
MW501910;Lepidoptera;Colias crocea;NA;0.059;NA;0.999999999999738;  
MW501911;Lepidoptera;Pyrgus sidae;Pyrgus sidae;1;Pyrgus sidae;0.99996750457282;  
MW501913;Lepidoptera;Erebia pandrose;Erebia pandrose;0.998;Erebia pandrose;0.997117103851311;  
MW501914;Lepidoptera;Pyrgus malvae;Pyrgus malvae;0.002;Pyrgus malvae;0.985142346100264;  
MW501915;Lepidoptera;Coenonympha rhodopensis;NA;0.029;Coenonympha rhodopensis;0.880788896557773;  
MW501916;Lepidoptera;Ochlodes sylvanus;NA;NA;Ochlodes sylvanus;0.983291341831427;  
MW501917;Lepidoptera;Euphydryas aurinia;NA;0.31;Euphydryas aurinia;0.993387708761386;  
MW501918;Lepidoptera;Brenthis daphne;Brenthis daphne;0.001;Brenthis daphne;0.996209297077896;  
MW501919;Lepidoptera;Boloria titania;Boloria titania;0.001;Boloria titania;0.999723894737618;  
MW501923;Lepidoptera;Araschnia levana;Araschnia levana;1;Araschnia levana;0.999999810741645;  
MW501925;Lepidoptera;Aphantopus hyperantus;Aphantopus hyperantus;0.003;Aphantopus hyperantus;0.999999455871523;  
MW501928;Lepidoptera;Thymelicus lineola;Thymelicus lineola;1;Thymelicus lineola;0.999971535093703;  
MW501932;Lepidoptera;Minois dryas;NA;0.025;Minois dryas;0.850746026247397;  
MW501933;Lepidoptera;Erebia euryale;NA;NA;Erebia euryale;0.919518760623792;  
MW501937;Lepidoptera;Coenonympha pamphilus;Coenonympha pamphilus;1;Coenonympha pamphilus;0.99999999999744;  
MW501939;Lepidoptera;Pyrgus andromedae;Pyrgus andromedae;0.001;Pyrgus andromedae;0.998828669843251;  
MW501945;Lepidoptera;Boloria napaea;Boloria napaea;1;Boloria napaea;0.997745255839468;  
MW501946;Lepidoptera;Nymphalis c-album;NA;0.215;NA;0.999999192918557;  
MW501947;Lepidoptera;Plebejus argyrognomon;NA;0.001;NA;0.994620093546684;  
MW501949;Lepidoptera;Maniola jurtina;NA;NA;0.9999999988982;  
MW501952;Lepidoptera;Aricia artaxerxes;NA;0.394;Aricia artaxerxes;0.999502890976379;  
MW501953;Lepidoptera;Erebia tyndarus;NA;NA;NA;0.99999999999783;  
MW501959;Lepidoptera;Lycaena tityrus;Lycaena tityrus;1;Lycaena tityrus;0.999999828238034;  
MW501961;Lepidoptera;Pyrgus alveus;NA;0.003;NA;0.99999999997732;  
MW501962;Lepidoptera;Melitaea nevadensis;NA;0.027;Melitaea celadussa;0.855973806057658;  
MW501963;Lepidoptera;Lycaena tityrus;Lycaena tityrus;1;Lycaena tityrus;0.999999033166217;  
MW501964;Lepidoptera;Coenonympha pamphilus;Coenonympha pamphilus;1;Coenonympha pamphilus;0.99999999999886;  
MW501965;Lepidoptera;Plebejus argus;NA;0.328;Plebejus argus;0.969789734199889;  
MW501966;Lepidoptera;Pyrgus andromedae;Pyrgus andromedae;0.001;Pyrgus andromedae;0.998828669843251;  
MW501967;Lepidoptera;Callophrys rubi;NA;0.003;Callophrys rubi;0.997328639918919;  
MW501968;Lepidoptera;Polyommatus icarus;NA;0.13;Polyommatus icarus;0.979762695748748;  
MW501971;Lepidoptera;Polyommatus icarus;NA;0.004;Polyommatus icarus;0.987731099361481;  
MW501974;Lepidoptera;Gonepteryx rhamni;NA;0.474;Gonepteryx rhamni;0.982076396127858;  
MW501977;Lepidoptera;Erebia oeme;NA;NA;Erebia oeme;0.99999999850758;  
MW501979;Lepidoptera;Cercyonis lupina;Hyponephele lupina;1;Hyponephele lupina;0.999999966744753;  
MW501980;Lepidoptera;Coenonympha arcania;NA;0.316;NA;0.999999999999985;

MW501982;Lepidoptera;Polyommatus dolus;Polyommatus dolus;0.002;Polyommatus dolus;0.968601441655996;  
MW501986;Lepidoptera;Erebia euryale;NA;NA;Erebia euryale;0.878197196746751;  
MW501987;Lepidoptera;Pyrgus warrenensis;NA;0.003;NA;0.99999999997732;  
MW501989;Lepidoptera;Chazara briseis;Chazara briseis;0.001;Chazara briseis;0.999984130678865;  
MW501990;Lepidoptera;Erebia pronoe;Erebia pronoe;1;Erebia pronoe;0.999639549642344;  
MW501994;Lepidoptera;Colias crocea;NA;0.059;NA;0.99999999999738;  
MW501996;Lepidoptera;Colias phicomone;NA;0.001;Colias phicomone;0.985598879697681;  
MW501997;Lepidoptera;Pyrgus warrenensis;NA;NA;NA;0.99999999995618;  
MW501999;Lepidoptera;Erebia pronoe;Erebia pronoe;0.001;Erebia pronoe;0.999412757816713;  
MW502000;Lepidoptera;Lysandra hispana;NA;NA;NA;0.991101143061329;  
MW502001;Lepidoptera;Pyrgus armoricanus;Pyrgus armoricanus;1;Pyrgus armoricanus;0.999997353848817;  
MW502003;Lepidoptera;Erebia oeme;NA;0.211;Erebia oeme;0.999999999800025;  
MW502005;Lepidoptera;Melanargia galathea;Melanargia galathea;NA;Melanargia galathea;0.935799586887365;  
MW502006;Lepidoptera;Thymelicus acteon;Thymelicus acteon;1;Thymelicus acteon;0.999999994723538;  
MW502007;Lepidoptera;Pyrgus cacaliae;Pyrgus cacaliae;NA;Pyrgus cacaliae;0.992462992085655;  
MW502008;Lepidoptera;Boloria napaea;Boloria napaea;0.001;Boloria napaea;0.989385815067932;  
MW502013;Lepidoptera;Plebejus idas;NA;0.007;NA;0.999546324331549;  
MW502014;Lepidoptera;Plebejus idas;NA;0.007;NA;0.999546324331549;  
MW502017;Lepidoptera;Anthocharis cardamines;Anthocharis cardamines;1;Anthocharis cardamines;0.999999956331181;  
MW502018;Lepidoptera;Erebia pluto;Erebia pluto;1;Erebia pluto;0.999999977588772;  
MW502021;Lepidoptera;Hipparchia semele;NA;0.002;Hipparchia semele;0.784603069619426;  
MW502022;Lepidoptera;Maniola jurtina;NA;NA;NA;0.9999999988982;  
MW502023;Lepidoptera;Satyrium acaciae;Satyrium acaciae;1;Satyrium acaciae;0.999999961966751;  
MW502025;Lepidoptera;Euphydryas cynthia;Euphydryas cynthia;1;Euphydryas cynthia;0.999999086719176;  
MW502026;Lepidoptera;Erebia pharte;Erebia pharte;1;Erebia pharte;0.999999986862974;  
MW502027;Lepidoptera;Hipparchia semele;NA;0.002;Hipparchia semele;0.807780383202924;  
MW502028;Lepidoptera;Pyrgus warrenensis;NA;NA;NA;0.99999999995618;  
MW502030;Lepidoptera;Aphantopus hyperantus;Aphantopus hyperantus;0.006;Aphantopus hyperantus;0.999998615504572;  
MW502031;Lepidoptera;Lycaena virgaureae;NA;0.181;Lycaena virgaureae;0.999036178741803;  
MW502032;Lepidoptera;Erebia pronoe;Erebia pronoe;0.001;Erebia pronoe;0.999412757816713;  
MW502033;Lepidoptera;Coenonympha rhodopensis;Coenonympha rhodopensis;0.002;Coenonympha rhodopensis;0.972179742721853;  
MW502035;Lepidoptera;Hipparchia semele;NA;0.002;Hipparchia semele;0.807780383202924;  
MW502036;Lepidoptera;Coenonympha pamphilus;Coenonympha pamphilus;1;Coenonympha pamphilus;0.99999999999744;  
MW502039;Lepidoptera;Erebia oeme;NA;0.114;Erebia oeme;0.999999999830635;  
MW502040;Lepidoptera;Favonius quercus;NA;NA;NA;0.9999999999895;  
MW502042;Lepidoptera;Cupido argiades;NA;0.499;NA;0.99999999984682;  
MW502045;Lepidoptera;Polyommatus escheri;Polyommatus escheri;1;Polyommatus escheri;0.999942519273174;  
MW502050;Lepidoptera;Argynnis paphia;Argynnis paphia;1;Argynnis paphia;0.999999991389927;  
MW502052;Lepidoptera;Erebia pharte;Erebia pharte;1;Erebia pharte;0.9999999630495;  
MW502053;Lepidoptera;Polyommatus thersites;NA;NA;Polyommatus thersites;0.99999827100753;  
MW502056;Lepidoptera;Pyrgus malvae;Pyrgus malvae;0.004;Pyrgus malvae;0.994833600246024;  
MW502058;Lepidoptera;Lycaena thersamon;Thersamon thersamon;NA;Lycaena thersamon;0.923987398217373;  
MW502059;Lepidoptera;Callophrys rubi;NA;0.001;Callophrys rubi;0.99870518510598;  
MW502060;Lepidoptera;Carterocephalus palaemon;NA;0.052;Carterocephalus palaemon;0.728445051795325;  
MW502062;Lepidoptera;Celastrina argiolus;Celastrina argiolus;1;Celastrina argiolus;0.999708846309046;  
MW502063;Lepidoptera;Boloria euphrosyne;Boloria euphrosyne;1;Boloria euphrosyne;0.99998514406196;  
MW502064;Lepidoptera;Maniola jurtina;NA;0.001;Maniola jurtina;0.939220105860875;  
MW502065;Lepidoptera;Lysandra coridon;Lysandra coridon;NA;Lysandra coridon;0.743911809614173;  
MW502066;Lepidoptera;Cupido minimus;NA;0.009;Cupido minimus;0.999791453712643;  
MW502070;Lepidoptera;Chazara briseis;Chazara briseis;0.991;Chazara briseis;0.99993251778394;  
MW502076;Lepidoptera;Pieris napi;NA;0.028;Pieris napi;0.888205720664699;  
MW502079;Lepidoptera;Lycaena tityrus;Lycaena tityrus;1;Lycaena tityrus;0.999999137688152;  
MW502080;Lepidoptera;Pyrgus alveus;NA;NA;Pyrgus alveus;0.902591602214502;  
MW502081;Lepidoptera;Maniola jurtina;NA;0.026;NA;0.99999999998053;  
MW502082;Lepidoptera;Agriades orbitulus;NA;0.01;Agriades orbitulus;0.998991302227708;  
MW502083;Lepidoptera;Erebia scipio;Erebia scipio;1;Erebia scipio;0.99999995978129;  
MW502084;Lepidoptera;Thymelicus lineola;Thymelicus lineola;1;Thymelicus lineola;0.999971535093703;  
MW502085;Lepidoptera;Melitaea didyma;Melitaea didyma;1;Melitaea didyma;0.99990369529223;  
MW502086;Lepidoptera;Melitaea didyma;Melitaea didyma;1;Melitaea didyma;0.992165146696479;  
MW502087;Lepidoptera;Agriades optilete;Agriades optilete;1;Agriades optilete;0.99999999183251;  
MW502088;Lepidoptera;Aphantopus hyperantus;Aphantopus hyperantus;0.004;Aphantopus hyperantus;0.999598909345147;  
MW502090;Lepidoptera;Erebia melampus;Erebia melampus;NA;Erebia melampus;0.947570619386055;  
MW502092;Lepidoptera;Nymphalis io;NA;0.491;Aglais io;0.930153237246992;



MW502093;Lepidoptera;Fabriciana elisa;Fabriciana elisa;0.001;Fabriciana elisa;0.994839902224823;  
MW502095;Lepidoptera;Satyrium spini;Satyrium spini;1;Satyrium spini;0.999999835426407;  
MW502097;Lepidoptera;Erebia ottomana;Erebia ottomana;1;Erebia ottomana;0.999999994283371;  
MW502098;Lepidoptera;Celastrina argiolus;Celastrina argiolus;1;Celastrina  
argiolus;0.999631157817044;  
MW502100;Lepidoptera;Satyrium pruni;NA;0.076;Satyrium pruni;0.990322364021655;  
MW502101;Lepidoptera;Maniola jurtina;NA;0.001;Maniola jurtina;0.939220105860875;  
MW502103;Lepidoptera;Colias alfacariensis;Colias alfacariensis;0.001;Colias  
alfacariensis;0.999926026317526;  
MW502104;Lepidoptera;Boloria selene;NA;0.064;Boloria selene;0.999999700362042;  
MW502106;Lepidoptera;Hipparchia semele;NA;0.002;Hipparchia semele;0.784603069619426;  
MW502109;Lepidoptera;Fabriciana adippe;Fabriciana adippe;0.007;Fabriciana  
adippe;0.993943750142209;  
MW502110;Lepidoptera;Euphydryas aurinia;NA;0.31;Euphydryas aurinia;0.993387708761386;  
MW502111;Lepidoptera;Satyrium spini;Satyrium spini;1;Satyrium spini;0.999999835426407;  
MW502112;Lepidoptera;Boloria thore;Boloria thore;1;Boloria thore;0.99999999029967;  
MW502114;Lepidoptera;Lampides boeticus;Lampides boeticus;1;Lampides boeticus;0.99999999545906;  
MW502117;Lepidoptera;Maniola jurtina;NA;0.038;NA;0.99999999999524;  
MW502118;Lepidoptera;Boloria pales;Boloria pales;0.972;Boloria pales;0.996859116493867;  
MW502119;Lepidoptera;Plebejus argus;NA;0.123;Plebejus argus;0.980927835351298;  
MW502121;Lepidoptera;Boloria selene;NA;0.281;Boloria selene;0.99999606392712;  
MW502122;Lepidoptera;Limenitis populi;Limenitis populi;1;Limenitis populi;0.9999999991303;  
MW502123;Lepidoptera;Nymphalis antiopa;NA;0.23;Nymphalis antiopa;0.999999944198096;  
MW502124;Lepidoptera;Cupido argiades;NA;0.499;NA;0.999999999984682;  
MW502125;Lepidoptera;Erebia styx;NA;NA;Erebia styx;0.871664865838723;  
MW502126;Lepidoptera;Oeneis glacialis;Oeneis glacialis;0.003;Oeneis glacialis;0.981039562032588;  
MW502127;Lepidoptera;Polyommatus amandus;Polyommatus amandus;0.006;Polyommatus  
amandus;0.999984603640236;  
MW502134;Lepidoptera;Erebia stiria;NA;NA;Erebia styx;0.890739244956497;  
MW502138;Lepidoptera;Brintesia circe;Brintesia circe;NA;Brintesia circe;0.999999813082031;  
MW502139;Lepidoptera;Thymelicus lineola;Thymelicus lineola;1;Thymelicus  
lineola;0.999995927238524;  
MW502140;Lepidoptera;Chazara briseis;Chazara briseis;0.002;Chazara briseis;0.999942072582126;  
MW502145;Lepidoptera;Brintesia circe;Brintesia circe;NA;Brintesia circe;0.999999813082031;  
MW502147;Lepidoptera;Argynnis paphia;Argynnis paphia;1;Argynnis paphia;0.99999991389927;  
MW502148;Lepidoptera;Melitaea didyma;Melitaea didyma;1;Melitaea didyma;0.999768602965124;  
MW502149;Lepidoptera;Coenonympha rhodopensis;Coenonympha rhodopensis;0.012;Coenonympha  
rhodopensis;0.926561478746927;  
MW502151;Lepidoptera;Aricia cramera;Aricia cramera;1;Aricia cramera;0.999990014848976;  
MW502152;Lepidoptera;Erebia pandrose;Erebia pandrose;0.001;Erebia pandrose;0.995505011723455;  
MW502156;Lepidoptera;Melitaea nevadensis;NA;0.04;Melitaea celadussa;0.728975812879384;  
MW502158;Lepidoptera;Vanessa atalanta;Vanessa atalanta;1;Vanessa atalanta;0.99999999757762;  
MW502160;Lepidoptera;Euphydryas aurinia;NA;0.001;Euphydryas aurinia;0.995576749826865;  
MW502161;Lepidoptera;Erebia montana;Erebia montana;NA;Erebia montana;0.999579175213061;  
MW502163;Lepidoptera;Pyrgus alveus;NA;0.003;NA;0.99999999997732;  
MW502166;Lepidoptera;Hamearis lucina;NA;NA;Hamearis lucina;0.999999999984141;  
MW502169;Lepidoptera;Brenthis ino;Brenthis ino;0.998;Brenthis ino;0.990926326543065;  
MW502172;Lepidoptera;Polyommatus icarus;NA;0.003;Polyommatus icarus;0.986125651677522;  
MW502174;Lepidoptera;Thymelicus acteon;Thymelicus acteon;1;Thymelicus acteon;0.9999999752248;  
MW502175;Lepidoptera;Thymelicus sylvestris;Thymelicus sylvestris;1;Thymelicus  
sylvestris;0.99999876153052;  
MW502176;Lepidoptera;Aphantopus hyperantus;Aphantopus hyperantus;0.002;Aphantopus  
hyperantus;0.999999300149444;  
MW502177;Lepidoptera;Melitaea nevadensis;NA;0.002;NA;0.999999999959163;  
MW502178;Lepidoptera;Polyommatus amandus;Polyommatus amandus;0.003;Polyommatus  
amandus;0.999980071833264;  
MW502179;Lepidoptera;Pieris napi;NA;NA;Pieris napi;0.818637490189647;  
MW502182;Lepidoptera;Coenonympha glycerion;NA;0.28;Coenonympha glycerion;0.999998036263913;  
MW502184;Lepidoptera;Cupido argiades;NA;0.499;NA;0.999999999984682;  
MW502185;Lepidoptera;Polyommatus icarus;Polyommatus icarus;0.001;Polyommatus  
icarus;0.999389234561512;  
MW502189;Lepidoptera;Thymelicus acteon;Thymelicus acteon;1;Thymelicus acteon;0.999999996401357;  
MW502191;Lepidoptera;Erebia melampus;Erebia melampus;NA;Erebia melampus;0.950990028966024;  
MW502194;Lepidoptera;Aglaia urticae;NA;0.002;Aglaia urticae;0.987497593219019;  
MW502196;Lepidoptera;Erebia ottomana;Erebia ottomana;1;Erebia ottomana;0.999999994283371;  
MW502202;Lepidoptera;Erebia tyndarus;NA;NA;NA;0.999999999999923;  
MW502204;Lepidoptera;Boloria euphrosyne;Boloria euphrosyne;0.001;Boloria  
euphrosyne;0.999985640170951;  
MW502206;Lepidoptera;Brenthis daphne;Brenthis daphne;0.001;Brenthis daphne;0.996209297077896;  
MW502208;Lepidoptera;Melitaea nevadensis;NA;0.022;NA;0.99999999870539;  
MW502209;Lepidoptera;Maniola jurtina;NA;0.001;Maniola jurtina;0.939220105860875;  
MW502211;Lepidoptera;Plebejus idas;NA;0.007;NA;0.999546324331549;  
MW502212;Lepidoptera;Thymelicus lineola;Thymelicus lineola;1;Thymelicus  
lineola;0.9996983250391;  
MW502213;Lepidoptera;Polyommatus eros;NA;0.001;Polyommatus eros;0.863598753993334;  
MW502215;Lepidoptera;Ochlodes sylvanus;NA;NA;Ochlodes sylvanus;0.99339142571959;  
MW502216;Lepidoptera;Callophrys rubi;NA;0.003;Callophrys rubi;0.997328639918919;  
MW502217;Lepidoptera;Vanessa atalanta;Vanessa atalanta;1;Vanessa atalanta;0.999999999383476;

MW502218;Lepidoptera;Lasiommata maera;Lasiommata maera;1;Lasiommata maera;0.99999510792253;  
MW502222;Lepidoptera;Erebia pronoe;Erebia pronoe;0.001;Erebia pronoe;0.999412757816713;  
MW502228;Lepidoptera;Plebejus argyrognomon;NA;0.001;NA;0.998518811781132;  
MW502229;Lepidoptera;Pieris napi;NA;0.066;Pieris napi;0.832895481558215;  
MW502230;Lepidoptera;Colias phicomone;NA;0.001;Colias phicomone;0.985598879697681;  
MW502232;Lepidoptera;Polyommatus humedasa;Polyommatus humedasa;1;Polyommatus  
humedasa;0.998764240535817;  
MW502234;Lepidoptera;Plebejus argus;NA;0.123;Plebejus argus;0.980927835351298;  
MW502235;Lepidoptera;Polyommatus amandus;Polyommatus amandus;0.03;Polyommatus  
amandus;0.99992197531069;  
MW502236;Lepidoptera;Favonius quercus;NA;NA;Favonius quercus;0.73046069582187;  
MW502237;Lepidoptera;Boloria thore;Boloria thore;1;Boloria thore;0.99999998475204;  
MW502238;Lepidoptera;Erebia melampus;Erebia melampus;0.011;Erebia melampus;0.975499903768874;  
MW502244;Lepidoptera;Aricia eumedon;Eumedonia eumedon;0.015;Eumedonia eumedon;0.98991871778437;  
MW502245;Lepidoptera;Minois dryas;NA;0.025;Minois dryas;0.850746026247397;  
MW502247;Lepidoptera;Polyommatus icarus;Polyommatus icarus;0.001;Polyommatus  
icarus;0.999851522482238;  
MW502249;Lepidoptera;Pyrgus foulquieri;NA;NA;Pyrgus alveus;0.827119616974978;  
MW502250;Lepidoptera;Ochlodes sylvanus;NA;0.316;Ochlodes sylvanus;0.996318754838625;  
MW502251;Lepidoptera;Plebejus idas;NA;0.007;NA;0.999546324331549;  
MW502252;Lepidoptera;Erebia pandrose;NA;NA;Erebia pandrose;0.993612919083967;  
MW502253;Lepidoptera;Agriades optilete;Agriades optilete;1;Agriades optilete;0.999999984197984;  
MW502255;Lepidoptera;Carcharodus alceae;Carcharodus floccifera;0.002;Carcharodus  
alceae;0.999998700823815;  
MW502256;Lepidoptera;Pyrgus cacaliae;Pyrgus cacaliae;0.001;Pyrgus cacaliae;0.99354498208327;  
MW502257;Lepidoptera;Colias palaeno;NA;0.002;NA;0.99999999983681;  
MW502258;Lepidoptera;Euphydryas maturna;NA;0.126;Euphydryas maturna;0.885705216462044;  
MW502259;Lepidoptera;Vanessa cardui;Vanessa cardui;1;Vanessa cardui;0.999999459983318;  
MW502260;Lepidoptera;Glaucopsyche alexis;Glaucopsyche alexis;0.002;Glaucopsyche  
alexis;0.946909051180219;  
MW502263;Lepidoptera;Gonepteryx rhamni;NA;0.474;Gonepteryx rhamni;0.982076396127858;  
MW502265;Lepidoptera;Maniola jurtina;NA;0.001;Maniola jurtina;0.939220105860875;  
MW502269;Lepidoptera;Argynnis paphia;Argynnis paphia;1;Argynnis paphia;0.99999991389927;  
MW502272;Lepidoptera;Brenthis daphne;Brenthis daphne;0.006;Brenthis daphne;0.984559944066479;  
MW502275;Lepidoptera;Brenthis daphne;Brenthis daphne;0.001;Brenthis daphne;0.996209297077896;  
MW502276;Lepidoptera;Polyommatus eros;NA;0.002;Polyommatus eros;0.863326410584652;  
MW502277;Lepidoptera;Lysandra coridon;NA;NA;NA;0.999974015575741;  
MW502278;Lepidoptera;Araschnia levana;Araschnia levana;1;Araschnia levana;0.999999772187832;  
MW502280;Lepidoptera;Callophrys rubi;NA;0.003;Callophrys rubi;0.997328639918919;  
MW502281;Lepidoptera;Aricia eumedon;NA;0.128;NA;0.999999992682818;  
MW502282;Lepidoptera;Lysandra coridon;NA;NA;NA;0.998070184737648;  
MW502287;Lepidoptera;Argynnis paphia;Argynnis paphia;1;Argynnis paphia;0.99999991389927;  
MW502293;Lepidoptera;Cupido alcetas;NA;0.218;Cupido alcetas;0.833501983138177;  
MW502294;Lepidoptera;Lysandra coridon;NA;NA;NA;0.998940605326042;  
MW502296;Lepidoptera;Erebia eriphyle;Erebia eriphyle;1;Erebia eriphyle;0.999999917521936;  
MW502297;Lepidoptera;Erebia ottomana;Erebia ottomana;1;Erebia ottomana;0.99999991465188;  
MW502299;Lepidoptera;Coenonympha gardetta;NA;0.004;NA;0.99999999999983;  
MW502302;Lepidoptera;Vanessa cardui;Vanessa cardui;1;Vanessa cardui;0.999999459983318;  
MW502304;Lepidoptera;Maniola jurtina;NA;NA;NA;0.99999999991;  
MW502307;Lepidoptera;Boloria euphrosyne;Boloria euphrosyne;1;Boloria  
euphrosyne;0.999996652634483;  
MW502308;Lepidoptera;Cupido argiades;NA;0.499;NA;0.999999999984682;  
MW502309;Lepidoptera;Erebia ottomana;Erebia ottomana;1;Erebia ottomana;0.99999991465188;  
MW502310;Lepidoptera;Brenthis hecate;NA;0.111;Brenthis hecate;0.99960101934423;  
MW502311;Lepidoptera;Glaucopsyche alexis;NA;NA;Glaucopsyche alexis;0.96998277832517;  
MW502313;Lepidoptera;Lysandra coridon;Lysandra coridon;NA;NA;Lysandra coridon;0.908279157303887;  
MW502315;Lepidoptera;Coenonympha pamphilus;Coenonympha pamphilus;1;Coenonympha  
pamphilus;0.99999999999744;  
MW502316;Lepidoptera;Cyaniris semiargus;NA;NA;Cyaniris semiargus;0.999340971619824;  
MW502317;Lepidoptera;Pyrgus warrenensis;NA;0.003;NA;0.99999999997732;  
MW502319;Lepidoptera;Satyrium spini;Satyrium spini;1;Satyrium spini;0.999999721054916;  
MW502320;Lepidoptera;Erebia medusa;NA;0.034;Erebia medusa;0.989870112589682;  
MW502321;Lepidoptera;Plebejus argus;NA;0.002;Plebejus argus;0.938530770188254;  
MW502322;Lepidoptera;Colias palaeno;NA;NA;NA;0.999999998051059;  
MW502328;Lepidoptera;Hipparchia semele;NA;0.001;NA;0.99999999999936;  
MW502331;Lepidoptera;Plebejus argus;NA;NA;Plebejus argus;0.977793255361976;  
MW502334;Lepidoptera;Pyrgus andromedae;NA;0.002;Pyrgus andromedae;0.989684399291934;  
MW502335;Lepidoptera;Coenonympha glycerion;NA;0.098;Coenonympha glycerion;0.99998091866873;  
MW502336;Lepidoptera;Helleia helle;Lycaena helle;1;Lycaena helle;0.99999984510879;  
MW502340;Lepidoptera;Melitaea didyma;Melitaea didyma;1;Melitaea didyma;0.99974147574482;  
MW502341;Lepidoptera;Plebejus argus;NA;0.112;Plebejus argus;0.964043871125174;  
MW502343;Lepidoptera;Plebejus argus;NA;0.122;Plebejus argus;0.956948912376078;  
MW502344;Lepidoptera;Cercyonis lupina;Hyponephele lupina;1;Hyponephele lupina;0.999999779095187;  
MW502346;Lepidoptera;Erebia stiria;NA;0.101;Erebia styx;0.893191087834584;  
MW502347;Lepidoptera;Pyrgus carlinae;NA;NA;Pyrgus carlinae;0.854199018204849;  
MW502349;Lepidoptera;Polyommatus humedasa;Polyommatus humedasa;1;Polyommatus  
humedasa;0.998764240535817;

MW502351;Lepidoptera;Aphantopus hyperantus;Aphantopus hyperantus;0.998;Aphantopus hyperantus;0.998538695992041;  
MW502352;Lepidoptera;Pyrgus alveus;NA;0.003;NA;0.99999999997732;  
MW502353;Lepidoptera;Coenonympha pamphilus;Coenonympha pamphilus;1;Coenonympha pamphilus;0.99999999999744;  
MW502354;Lepidoptera;Colias phicomone;NA;0.001;Colias phicomone;0.985598879697681;  
MW502356;Lepidoptera;Cyraniris semiargus;NA;NA;Cyraniris semiargus;0.999051841766953;  
MW502358;Lepidoptera;Nymphalis c-album;NA;0.215;NA;0.999999192918557;  
MW502359;Lepidoptera;Thecla betulae;Thecla betulae;1;Thecla betulae;0.99999999961346;  
MW502361;Lepidoptera;Thymelicus sylvestris;Thymelicus sylvestris;1;Thymelicus sylvestris;0.999999985935205;  
MW502362;Lepidoptera;Coenonympha arcania;NA;0.001;NA;0.99999999999965;  
MW502363;Lepidoptera;Coenonympha pamphilus;Coenonympha pamphilus;1;Coenonympha pamphilus;0.99999999999744;  
MW502365;Lepidoptera;Plebejus idas;NA;0.007;NA;0.999546324331549;  
MW502370;Lepidoptera;Pyrgus cacaliae;Pyrgus cacaliae;NA;Pyrgus cacaliae;0.992462992085655;  
MW502371;Lepidoptera;Erebia scipio;Erebia scipio;1;Erebia scipio;0.99999996898623;  
MW502372;Lepidoptera;Erebia epiphron;NA;NA;Erebia epiphron;0.994401488812176;  
MW502373;Lepidoptera;Pyrgus cacaliae;Pyrgus cacaliae;NA;Pyrgus cacaliae;0.991212846958486;  
MW502374;Lepidoptera;Callophrys rubi;NA;0.002;Callophrys rubi;0.998841790162773;  
MW502375;Lepidoptera;Plebejus argus;NA;0.123;Plebejus argus;0.980927835351298;  
MW502376;Lepidoptera;Cupido argiades;NA;0.499;NA;0.99999999984682;  
MW502378;Lepidoptera;Aglais urticae;Aglais urticae;0.001;Aglais urticae;0.994966452807995;  
MW502380;Lepidoptera;Apatura ilia;NA;NA;Apatura ilia;0.831948942554807;  
MW502382;Lepidoptera;Lycaena tityrus;Lycaena tityrus;1;Lycaena tityrus;0.999998928238034;  
MW502385;Lepidoptera;Glaucopsyche alexis;NA;NA;Glaucopsyche alexis;0.976271367951777;  
MW502387;Lepidoptera;Colias crocea;NA;0.059;NA;0.99999999999738;  
MW502389;Lepidoptera;Cupido alcetas;NA;0.218;Cupido alcetas;0.833501983138177;  
MW502390;Lepidoptera;Nymphalis egea;Polygonia egea;1;Polygonia egea;0.99999758078475;  
MW502391;Lepidoptera;Carcharodus alceae;Carcharodus alceae;1;Carcharodus alceae;0.99999998465938;  
MW502395;Lepidoptera;Satyrium w-album;NA;0.033;Satyrium w-album;0.98832655045484;  
MW502398;Lepidoptera;Lycaena phlaeas;Lycaena phlaeas;1;Lycaena phlaeas;0.999999965234;  
MW502399;Lepidoptera;Satyrium ilicis;Satyrium ilicis;1;Satyrium ilicis;0.99999987901305;  
MW502400;Lepidoptera;Gegenes pumilio;NA;0.051;Gegenes pumilio;0.999825034556942;  
MW502401;Lepidoptera;Pyrgus alveus;NA;NA;Pyrgus alveus;0.902591602214502;  
MW502403;Lepidoptera;Melanargia galathea;Melanargia galathea;NA;Melanargia galathea;0.975968639189374;  
MW502405;Lepidoptera;Erebia nivalis;NA;NA;NA;0.99999999999947;  
MW502408;Lepidoptera;Erebia montana;Erebia montana;1;Erebia montana;0.999137916448558;  
MW502409;Lepidoptera;Pyrgus cacaliae;Pyrgus cacaliae;NA;Pyrgus cacaliae;0.992462992085655;  
MW502410;Lepidoptera;Vanessa atalanta;Vanessa atalanta;1;Vanessa atalanta;0.99999999757762;  
MW502411;Lepidoptera;Aricia artaxerxes;NA;0.001;Aricia artaxerxes;0.999246506715116;  
MW502412;Lepidoptera;Lampides boeticus;Lampides boeticus;1;Lampides boeticus;0.99999999545906;  
MW502415;Lepidoptera;Polyommatus icarus;NA;0.001;Polyommatus icarus;0.981285528541973;  
MW502416;Lepidoptera;Erebia pharte;Erebia pharte;1;Erebia pharte;0.999999991351785;  
MW502417;Lepidoptera;Cercyonis lupina;Hyponephele lupina;1;Hyponephele lupina;0.99999979579656;  
MW502418;Lepidoptera;Lycaena phlaeas;Lycaena phlaeas;1;Lycaena phlaeas;0.999999990597075;  
MW502422;Lepidoptera;Hipparchia hermione;Hipparchia hermione;1;Hipparchia hermione;0.999830949884544;  
MW502424;Lepidoptera;Argynnis aglaja;NA;NA;Speyeria aglaja;0.872991147917853;  
MW502426;Lepidoptera;Lycaena virgaureae;NA;0.186;Lycaena virgaureae;0.999491227342155;  
MW502429;Lepidoptera;Polyommatus dorylas;NA;0.005;Polyommatus dorylas;0.973036361462773;  
MW502435;Lepidoptera;Euphydryas maturna;NA;0.126;Euphydryas maturna;0.885705216462044;  
MW502436;Lepidoptera;Erebia euryale;NA;NA;Erebia euryale;0.919518760623792;  
MW502437;Lepidoptera;Melitaea cinxia;Melitaea cinxia;1;Melitaea cinxia;0.99999999999829;  
MW502438;Lepidoptera;Pyrgus alveus;NA;NA;Pyrgus alveus;0.902591602214502;  
MW502439;Lepidoptera;Hipparchia semele;NA;0.002;Hipparchia semele;0.784603069619426;  
MW502440;Lepidoptera;Plebejus argus;NA;0.002;Plebejus argus;0.96342087097223;  
MW502441;Lepidoptera;Pyrgus warrenensis;NA;0.003;NA;0.99999999997732;  
MW502442;Lepidoptera;Lycaena tityrus;Lycaena tityrus;1;Lycaena tityrus;0.999995729087172;  
MW502443;Lepidoptera;Maniola jurtina;NA;0.038;NA;0.99999999999524;  
MW502444;Lepidoptera;Aricia eumedon;Eumedonia eumedon;0.002;Eumedonia eumedon;0.996680972655769;  
MW502446;Lepidoptera;Glaucopsyche alexis;NA;NA;Glaucopsyche alexis;0.979381169624069;  
MW502447;Lepidoptera;Thymelicus acteon;Thymelicus acteon;1;Thymelicus acteon;0.9999999760044;  
MW502450;Lepidoptera;Euphydryas aurinia;NA;0.31;Euphydryas aurinia;0.993387708761386;  
MW502451;Lepidoptera;Euphydryas aurinia;NA;0.31;Euphydryas aurinia;0.993387708761386;  
MW502452;Lepidoptera;Aricia agestis;NA;0.099;Aricia agestis;0.994857168775148;  
MW502455;Lepidoptera;Erebia euryale;NA;NA;Erebia euryale;0.879439208055702;  
MW502457;Lepidoptera;Pyrgus armoricanus;Pyrgus armoricanus;1;Pyrgus armoricanus;0.997478680096412;  
MW502462;Lepidoptera;Melitaea diamina;NA;0.13;Melitaea diamina;0.999999982010166;  
MW502463;Lepidoptera;Thymelicus sylvestris;NA;0.324;Thymelicus sylvestris;0.999940778442454;  
MW502464;Lepidoptera;Aricia eumedon;NA;0.054;Eumedonia eumedon;0.997429303960375;  
MW502465;Lepidoptera;Satyrium ilicis;Satyrium ilicis;1;Satyrium ilicis;0.99999987901305;  
MW502469;Lepidoptera;Colias hyale;Colias hyale;0.015;Colias hyale;0.999997884296128;  
MW502470;Lepidoptera;Euphydryas maturna;NA;NA;Euphydryas maturna;0.957925789833158;  
MW502472;Lepidoptera;Ochlodes sylvanus;NA;0.316;Ochlodes sylvanus;0.996318754838625;

MW502474;Lepidoptera;Thymelicus lineola;Thymelicus lineola;0.994;Thymelicus lineola;0.999932286726117;  
MW502476;Lepidoptera;Coenonympha pamphilus;Coenonympha pamphilus;1;Coenonympha pamphilus;0.99999999999744;  
MW502478;Lepidoptera;Anthocharis damone;Anthocharis damone;0.001;Anthocharis damone;0.999977961350188;  
MW502479;Lepidoptera;Polyommatus icarus;NA;0.002;Polyommatus icarus;0.99863334013761;  
MW502480;Lepidoptera;Thecla betulae;Thecla betulae;1;Thecla betulae;0.99999999972886;  
MW502481;Lepidoptera;Pararge aegeria;Pararge aegeria;1;Pararge aegeria;0.99999999836319;  
MW502483;Lepidoptera;Colias alfacariensis;Colias alfacariensis;0.001;Colias alfacariensis;0.999926026317526;  
MW502484;Lepidoptera;Polyommatus eros;NA;0.005;Polyommatus eros;0.95275169203039;  
MW502485;Lepidoptera;Maniola jurtina;NA;0.001;Maniola jurtina;0.939220105860875;  
MW502486;Lepidoptera;Nymphalis egea;Polygonia egea;1;Polygonia egea;0.999999758078475;  
MW502487;Lepidoptera;Polyommatus daphnis;NA;0.001;Polyommatus daphnis;0.964594977896732;  
MW502489;Lepidoptera;Cyraniris semiargus;NA;NA;Cyraniris semiargus;0.997097672202902;  
MW502490;Lepidoptera;Maniola jurtina;NA;0.001;Maniola jurtina;0.939220105860875;  
MW502491;Lepidoptera;Thymelicus lineola;Thymelicus lineola;1;Thymelicus lineola;0.999988258187826;  
MW502493;Lepidoptera;Pyrgus malvoides;NA;0.277;Pyrgus malvoides;0.936126768014194;  
MW502495;Lepidoptera;Plebejus idas;NA;0.007;NA;0.999546324331549;  
MW502496;Lepidoptera;Erebia medusa;Erebia medusa;0.017;Erebia medusa;0.993978849043138;  
MW502497;Lepidoptera;Erynnis tages;Erynnis tages;1;Erynnis tages;0.99999281987018;  
MW502498;Lepidoptera;Satyrium spini;Satyrium spini;1;Satyrium spini;0.999999496031491;  
MW502499;Lepidoptera;Pyrgus cacaliae;Pyrgus cacaliae;0.001;Pyrgus cacaliae;0.99354498208327;  
MW502500;Lepidoptera;Favonius quercus;NA;NA;Favonius quercus;0.73046069582187;  
MW502501;Lepidoptera;Coenonympha gardetta;NA;0.001;Coenonympha gardetta;0.755947323088537;  
MW502502;Lepidoptera;Erebia meolans;Erebia meolans;NA;Erebia meolans;0.999861281978533;  
MW502503;Lepidoptera;Agriades optilete;Agriades optilete;1;Agriades optilete;0.999999864568;  
MW502505;Lepidoptera;Polyommatus thersites;Polyommatus thersites;1;Polyommatus thersites;0.999999906522508;  
MW502509;Lepidoptera;Polyommatus icarus;NA;0.025;Polyommatus icarus;0.963260957177141;  
MW502512;Lepidoptera;Erebia medusa polaris;NA;0.009;Erebia medusa;0.986275612856827;  
MW502517;Lepidoptera;Argynnis aglaja;NA;NA;NA;0.999999999998051;  
MW502520;Lepidoptera;Satyrium spini;Satyrium spini;1;Satyrium spini;0.999999496031491;  
MW502522;Lepidoptera;Cupido minimus;NA;0.005;Cupido minimus;0.999612494657844;  
MW502524;Lepidoptera;Apatura iris;Apatura iris;1;Apatura iris;0.999999999999972;  
MW502526;Lepidoptera;Melitaea didyma;Melitaea didyma;0.001;Melitaea didyma;0.996062859555302;  
MW502527;Lepidoptera;Lysandra coridon;NA;NA;NA;0.998070184737648;  
MW502528;Lepidoptera;Melitaea nevadensis;NA;0.487;Melitaea celadussa;0.99630462995506;  
MW502532;Lepidoptera;Lysandra coridon;NA;NA;Lysandra coridon;0.736044782729454;  
MW502533;Lepidoptera;Lycaena phlaeas;Lycaena phlaeas;1;Lycaena phlaeas;0.999999996363186;  
MW502534;Lepidoptera;Polyommatus amandus;Polyommatus amandus;0.004;Polyommatus amandus;0.999992140596893;  
MW502535;Lepidoptera;Polyommatus amandus;Polyommatus amandus;0.009;Polyommatus amandus;0.999961567688077;  
MW502540;Lepidoptera;Erebia mnestræ;Erebia mnestræ;0.002;Erebia mnestræ;0.999925087115009;  
MW502541;Lepidoptera;Plebejus idas;NA;0.001;NA;0.999400592506414;  
MW502542;Lepidoptera;Fabriciana adippe;Fabriciana adippe;0.028;Fabriciana adippe;0.969769198942097;  
MW502543;Lepidoptera;Cupido alcetas;Cupido alcetas;0.999;Cupido alcetas;0.995696397591104;  
MW502544;Lepidoptera;Aricia cramera;Aricia cramera;1;Aricia cramera;0.999993731037033;  
MW502545;Lepidoptera;Plebejus idas;NA;0.007;NA;0.999546324331549;  
MW502546;Lepidoptera;Coenonympha arcania;NA;0.12;NA;0.999999999999993;  
MW502549;Lepidoptera;Satyrium w-album;NA;0.056;Satyrium w-album;0.989378230996316;  
MW502551;Lepidoptera;Heteropterus morpheus;NA;NA;Heteropterus morpheus;0.999999999999943;  
MW502555;Lepidoptera;Fabriciana adippe;NA;NA;Fabriciana adippe;0.900255826442102;  
MW502556;Lepidoptera;Vanessa atalanta;Vanessa atalanta;1;Vanessa atalanta;0.99999999757762;  
MW502558;Lepidoptera;Ochlodes sylvanus;NA;0.316;Ochlodes sylvanus;0.996318754838625;  
MW502559;Lepidoptera;Aricia cramera;Aricia cramera;1;Aricia cramera;0.999993731037033;  
MW502560;Lepidoptera;Plebejus idas;NA;0.007;NA;0.999546324331549;  
MW502563;Lepidoptera;Coenonympha oedippus;Coenonympha oedippus;1;Coenonympha oedippus;0.999999999999972;  
MW502564;Lepidoptera;Plebejus argus;NA;0.025;Plebejus argus;0.986611356617775;  
MW502565;Lepidoptera;Lycaena phlaeas;Lycaena phlaeas;1;Lycaena phlaeas;0.999999995251216;  
MW502566;Lepidoptera;Aphantopus hyperantus;Aphantopus hyperantus;0.003;Aphantopus hyperantus;0.99999455871523;  
MW502567;Lepidoptera;Coenonympha gardetta;NA;0.12;NA;0.999999999999993;  
MW502568;Lepidoptera;Nymphalis io;NA;0.434;Aglais io;0.912310988923168;  
MW502569;Lepidoptera;Boloria titania;Boloria titania;0.001;Boloria titania;0.99983358374111;  
MW502570;Lepidoptera;Erebia montana;Erebia montana;1;Erebia montana;0.99953282420735;  
MW502572;Lepidoptera;Erebia oeme;NA;NA;Erebia oeme;0.999999998493848;  
MW502573;Lepidoptera;Erebia euryale;NA;NA;Erebia euryale;0.952625148879608;  
MW502574;Lepidoptera;Cercyonis lupina;Hyponphele lupina;1;Hyponphele lupina;0.99999995988722;  
MW502575;Lepidoptera;Polyommatus icarus;Polyommatus icarus;0.001;Polyommatus icarus;0.999182943827591;  
MW502576;Lepidoptera;Polyommatus amandus;Polyommatus amandus;0.004;Polyommatus amandus;0.999986259154429;

MW502579;Lepidoptera;Aglais urticae;Aglais urticae;0.001;Aglais urticae;0.990690600684087;  
MW502581;Lepidoptera;Parnassius apollo;Parnassius apollo;1;Parnassius apollo;0.992704703916692;  
MW502583;Lepidoptera;Cyaniris semiargus;NA;NA;Cyaniris semiargus;0.999051841766953;  
MW502585;Lepidoptera;Hipparchia hermione;NA;NA;NA;0.999999999999987;  
MW502586;Lepidoptera;Arethusana arethusana;NA;0.062;Arethusana arethusana;0.999962489703143;  
MW502587;Lepidoptera;Pyrgus carlinae;NA;NA;Pyrgus carlinae;0.854199018204849;  
MW502590;Lepidoptera;Erebia euryale;NA;NA;Erebia euryale;0.889230517271439;  
MW502591;Lepidoptera;Cupido osiris;Cupido osiris;0.001;Cupido osiris;0.99999920729954;  
MW502592;Lepidoptera;Thymelicus acteon;Thymelicus acteon;1;Thymelicus acteon;0.9999999752248;  
MW502593;Lepidoptera;Nymphalis io;NA;0.488;Aglais io;0.802915377005676;  
MW502600;Lepidoptera;Ochlodes sylvanus;NA;0.316;Ochlodes sylvanus;0.996318754838625;  
MW502602;Lepidoptera;Fabriciana adippe;Fabriciana adippe;0.012;Fabriciana  
adippe;0.987124560355947;  
MW502604;Lepidoptera;Thymelicus lineola;Thymelicus lineola;1;Thymelicus  
lineola;0.999963358528981;  
MW502607;Lepidoptera;Limenitis camilla;NA;0.162;Limenitis camilla;0.999812943135769;  
MW502608;Lepidoptera;Lysandra coridon;NA;NA;NA;0.998070184737648;  
MW502610;Lepidoptera;Thymelicus lineola;Thymelicus lineola;1;Thymelicus  
lineola;0.999971535093703;  
MW502611;Lepidoptera;Erebia ottomana;Erebia ottomana;1;Erebia ottomana;0.999999997526373;  
MW502612;Lepidoptera;Hipparchia hermione;NA;NA;NA;0.999999999999983;  
MW502613;Lepidoptera;Erebia oeme;NA;0.307;Erebia oeme;0.999999999792692;  
MW502615;Lepidoptera;Coenonympha glycerion;NA;0.295;Coenonympha glycerion;0.999998958157621;  
MW502619;Lepidoptera;Euphydryas aurinia;NA;0.31;Euphydryas aurinia;0.993387708761386;  
MW502621;Lepidoptera;Erebia pandrose;Erebia pandrose;0.998;Erebia pandrose;0.997117103851311;  
MW502622;Lepidoptera;Boloria selene;NA;0.116;Boloria selene;0.999999770118135;  
MW502624;Lepidoptera;Coenonympha gardetta;Coenonympha gardetta;0.001;Coenonympha  
gardetta;0.812426757800029;  
MW502628;Lepidoptera;Coenonympha arcania;NA;0.105;NA;0.999999999999971;  
MW502630;Lepidoptera;Erebia mnestrana;Erebia mnestrana;0.002;Erebia mnestrana;0.999845899963913;  
MW502631;Lepidoptera;Polyommatus eros;NA;NA;Polyommatus eros;0.941152118360389;  
MW502633;Lepidoptera;Minois dryas;NA;0.025;Minois dryas;0.850746026247397;  
MW502634;Lepidoptera;Melanargia galathea;Melanargia galathea;0.001;Melanargia  
galathea;0.963706294419367;  
MW502638;Lepidoptera;Plebejus argus;NA;0.112;Plebejus argus;0.964043871125174;  
MW502640;Lepidoptera;Pyrgus alveus;NA;0.001;NA;0.999999999991498;  
MW502641;Lepidoptera;Aglais urticae;Aglais urticae;NA;Aglais urticae;0.991389613374972;  
MW502642;Lepidoptera;Lycaena virgaureae;NA;0.156;Lycaena virgaureae;0.999059829588008;  
MW502644;Lepidoptera;Boloria euphrosyne;Boloria euphrosyne;1;Boloria  
euphrosyne;0.999998514406196;  
MW502646;Lepidoptera;Cupido argiades;NA;0.485;Cupido argiades;0.793589812644246;  
MW502647;Lepidoptera;Plebejus argus;NA;0.001;Plebejus argus;0.945765574185676;  
MW502648;Lepidoptera;Limenitis camilla;NA;0.03;Limenitis camilla;0.999963749201123;  
MW502650;Lepidoptera;Polyommatus damon;Polyommatus damon;1;Polyommatus damon;0.99999954219229;  
MW502651;Lepidoptera;Pyrgus foulquieri;NA;NA;Pyrgus alveus;0.827119616974978;  
MW502653;Lepidoptera;Erebia stiria;NA;NA;Erebia styx;0.890739244956497;  
MW502654;Lepidoptera;Aricia eumedon;NA;0.128;NA;0.999999992682818;  
MW502659;Lepidoptera;Argynnis aglaja;NA;0.005;NA;0.999999999994961;  
MW502660;Lepidoptera;Argynnis paphia;Argynnis paphia;1;Argynnis paphia;0.999999991389927;  
MW502661;Lepidoptera;Argynnis aglaja;NA;NA;NA;0.999999999996955;  
MW502665;Lepidoptera;Lycaena dispar;Lycaena dispar;1;Lycaena dispar;0.999999990743959;  
MW502666;Lepidoptera;Vanessa cardui;Vanessa cardui;1;Vanessa cardui;0.99999803450484;  
MW502667;Lepidoptera;Gonepteryx rhamni;NA;0.192;Gonepteryx rhamni;0.991002175992451;  
MW502670;Lepidoptera;Glaucopsyche alexis;NA;NA;Glaucopsyche alexis;0.979381169624069;  
MW502671;Lepidoptera;Helleia helle;Lycaena helle;1;Lycaena helle;0.999999967358548;  
MW502672;Lepidoptera;Lycaena phlaeas;Lycaena phlaeas;1;Lycaena phlaeas;0.999999994586489;  
MW502673;Lepidoptera;Polyommatus eros;NA;0.005;Polyommatus eros;0.962873614249808;  
MW502682;Lepidoptera;Lycaena thersamon;NA;NA;Lycaena thersamon;0.961302670565805;  
MW502686;Lepidoptera;Boloria euphrosyne;Boloria euphrosyne;1;Boloria  
euphrosyne;0.999998365644188;  
MW502687;Lepidoptera;Argynnis aglaja;NA;NA;Speyeria aglaja;0.796323911264179;  
MW502689;Lepidoptera;Hamearis lucina;NA;NA;Hamearis lucina;0.99999999972005;  
MW502691;Lepidoptera;Boloria pales;Boloria pales;0.999;Boloria pales;0.994407553568164;  
MW502694;Lepidoptera;Melitaea nevadensis;Melitaea celadussa;0.999;Melitaea  
celadussa;0.998163187842236;  
MW502696;Lepidoptera;Erebia meolans;Erebia meolans;NA;Erebia meolans;0.999835953426128;  
MW502697;Lepidoptera;Erebia oeme;Erebia oeme;NA;Erebia oeme;0.999999999728857;  
MW502698;Lepidoptera;Euphydryas aurinia;NA;0.31;Euphydryas aurinia;0.993387708761386;  
MW502699;Lepidoptera;Lasiommata megera;Lasiommata megera;0.006;Lasiommata  
megera;0.992588117195958;  
MW502700;Lepidoptera;Maniola jurtina;NA;0.001;Maniola jurtina;0.939220105860875;  
MW502701;Lepidoptera;Cyaniris semiargus;NA;NA;Cyaniris semiargus;0.997097672202902;  
MW502702;Lepidoptera;Favonius quercus;NA;NA;NA;0.999999999994383;  
MW502705;Lepidoptera;Lampides boeticus;Lampides boeticus;1;Lampides boeticus;0.999999999545906;  
MW502706;Lepidoptera;Carterocephalus palaemon;NA;0.052;Carterocephalus  
palaemon;0.728445051795325;  
MW502708;Lepidoptera;Polyommatus eros;NA;0.005;Polyommatus eros;0.962873614249808;  
MW502709;Lepidoptera;Boloria pales;Boloria pales;1;Boloria pales;0.997285936428828;

MW502711;Lepidoptera;Melanargia galathea;Melanargia galathea;NA;Melanargia galathea;0.981855578470499;  
MW502714;Lepidoptera;Thymelicus sylvestris;NA;0.324;Thymelicus sylvestris;0.999940778442454;  
MW502716;Lepidoptera;Argynnis paphia;Argynnis paphia;1;Argynnis paphia;0.999999991389927;  
MW502718;Lepidoptera;Melitaea nevadensis;NA;0.001;NA;0.99999999967009;  
MW502720;Lepidoptera;Erynnis tages;Erynnis tages;1;Erynnis tages;0.999997762421119;  
MW502722;Lepidoptera;Nymphalis c-album;NA;0.215;NA;0.999999192918557;  
MW502723;Lepidoptera;Thymelicus sylvestris;NA;0.14;Thymelicus sylvestris;0.999963443881537;  
MW502724;Lepidoptera;Coenonympha arcania;NA;0.172;Coenonympha arcania;0.963036309473038;  
MW502725;Lepidoptera;Heteropterus morpheus;NA;NA;Heteropterus morpheus;0.99999999999943;  
MW502726;Lepidoptera;Hipparchia semele;NA;0.002;Hipparchia semele;0.784603069619426;  
MW502727;Lepidoptera;Carterocephalus palaemon;Carterocephalus palaemon;0.016;Carterocephalus palaemon;0.930544560040029;  
MW502728;Lepidoptera;Nymphalis c-album;NA;0.192;NA;0.999999632248654;  
MW502729;Lepidoptera;Aricia eumedon;Eumedonia eumedon;1;Eumedonia eumedon;0.994829162794983;  
MW502730;Lepidoptera;Limenitis camilla;NA;0.03;Limenitis camilla;0.999963749201123;  
MW502733;Lepidoptera;Pyrgus alveus;NA;NA;Pyrgus alveus;0.902591602214502;  
MW502734;Lepidoptera;Maniola jurtina;NA;NA;NA;0.9999999985062;  
MW502735;Lepidoptera;Pyrgus warrenensis;NA;0.002;NA;0.99999999994567;  
MW502738;Lepidoptera;Favonius quercus;NA;NA;Favonius quercus;0.73046069582187;  
MW502739;Lepidoptera;Plebejus argus;NA;0.115;Plebejus argus;0.968885827920662;  
MW502740;Lepidoptera;Satyrium acaciae;Satyrium acaciae;1;Satyrium acaciae;0.999999754684667;  
MW502743;Lepidoptera;Coenonympha oedippus;Coenonympha oedippus;1;Coenonympha oedippus;0.99999999999886;  
MW502746;Lepidoptera;Araschnia levana;Araschnia levana;1;Araschnia levana;0.999999772187832;  
MW502747;Lepidoptera;Erebia medusa;Erebia medusa;0.001;Erebia medusa;0.988917655350113;  
MW502748;Lepidoptera;Pieris napi;NA;0.011;Pieris napi;0.801985394724814;  
MW502749;Lepidoptera;Euphydryas maturna;NA;0.043;Euphydryas maturna;0.800951977353662;  
MW502751;Lepidoptera;Polyommatus icarus;NA;0.016;Polyommatus icarus;0.992810170678618;  
MW502753;Lepidoptera;Erebia scipio;Erebia scipio;1;Erebia scipio;0.99999996031903;  
MW502754;Lepidoptera;Nymphalis egea;Polygonia egea;1;Polygonia egea;0.999999030751994;  
MW502757;Lepidoptera;Gonepteryx cleopatra;NA;0.938;Gonepteryx cleopatra;0.999060271988041;  
MW502758;Lepidoptera;Hipparchia semele;NA;0.002;Hipparchia semele;0.807780383202924;  
MW502759;Lepidoptera;Plebejus argyrognomon;NA;0.001;NA;0.992804156580579;  
MW502760;Lepidoptera;Coenonympha pamphilus;Coenonympha pamphilus;1;Coenonympha pamphilus;0.99999999999744;  
MW502762;Lepidoptera;Carcharodus alceae;NA;0.915;Carcharodus alceae;0.999999992000284;  
MW502764;Lepidoptera;Aphantopus hyperantus;Aphantopus hyperantus;0.003;Aphantopus hyperantus;0.999999455871523;  
MW502765;Lepidoptera;Satyrium spini;Satyrium spini;1;Satyrium spini;0.99998977323781;  
MW502769;Lepidoptera;Erebia manto;NA;0.008;Erebia manto;0.995147019031433;  
MW502771;Lepidoptera;Helleia helle;Lycaena helle;1;Lycaena helle;0.99999993533947;  
MW502772;Lepidoptera;Thymelicus lineola;Thymelicus lineola;1;Thymelicus lineola;0.999971535093703;  
MW502773;Lepidoptera;Gonepteryx cleopatra;Gonepteryx cleopatra;0.998;Gonepteryx cleopatra;0.999118636582266;  
MW502775;Lepidoptera;Parnassius apollo;Parnassius apollo;1;Parnassius apollo;0.99641937826143;  
MW502777;Lepidoptera;Coenonympha arcania;NA;0.062;Coenonympha arcania;0.984995921079476;  
MW502779;Lepidoptera;Brintesia circe;Brintesia circe;NA;Brintesia circe;0.99998981082378;  
MW502780;Lepidoptera;Lycaena tityrus;Lycaena tityrus;1;Lycaena tityrus;0.99998928238034;  
MW502781;Lepidoptera;Erebia pronoe;Erebia pronoe;1;Erebia pronoe;0.99980482908169;  
MW502783;Lepidoptera;Brenthis daphne;NA;0.102;Brenthis daphne;0.717134521611551;  
MW502786;Lepidoptera;Erebia pronoe;Erebia pronoe;1;Erebia pronoe;0.99980482908169;  
MW502787;Lepidoptera;Pyrgus onopordi;Pyrgus onopordi;1;Pyrgus onopordi;0.99999711229755;  
MW502790;Lepidoptera;Erebia medusa;NA;0.01;Erebia medusa;0.974853639336655;  
MW502794;Lepidoptera;Agriades orbitulus;NA;0.031;Agriades orbitulus;0.998409903321215;  
MW502795;Lepidoptera;Erebia pronoe;Erebia pronoe;NA;Erebia pronoe;0.906909765449499;  
MW502796;Lepidoptera;Thymelicus lineola;Thymelicus lineola;0.998;Thymelicus lineola;0.999984007743288;  
MW502797;Lepidoptera;Erebia eriphyle;Erebia eriphyle;1;Erebia eriphyle;0.99999983979336;  
MW502798;Lepidoptera;Polyommatus icarus;NA;0.001;Polyommatus icarus;0.96905816849887;  
MW502799;Lepidoptera;Melitaea cinxia;Melitaea cinxia;1;Melitaea cinxia;0.99999999999943;  
MW502803;Lepidoptera;Erebia pluto;Erebia pluto;1;Erebia pluto;0.99999988858747;  
MW502804;Lepidoptera;Euphydryas cynthia;Euphydryas cynthia;1;Euphydryas cynthia;0.999999086719176;  
MW502805;Lepidoptera;Colias crocea;NA;0.059;NA;0.99999999999738;  
MW502807;Lepidoptera;Colias crocea;NA;0.059;NA;0.99999999999738;  
MW502808;Lepidoptera;Erebia medusa;NA;0.04;Erebia medusa;0.984042649596477;  
MW502809;Lepidoptera;Cupido minimus;NA;0.001;Cupido minimus;0.999803920701362;  
MW502810;Lepidoptera;Boloria pales;Boloria pales;0.998;Boloria pales;0.998505091335692;  
MW502812;Lepidoptera;Polyommatus escheri;Polyommatus escheri;1;Polyommatus escheri;0.999999122411013;  
MW502813;Lepidoptera;Plebejus argus;NA;0.328;Plebejus argus;0.969789734199889;  
MW502814;Lepidoptera;Erebia pronoe;Erebia pronoe;1;Erebia pronoe;0.999598485132975;  
MW502818;Lepidoptera;Plebejus idas;NA;0.001;NA;0.996886382825129;  
MW502820;Lepidoptera;Polyommatus icarus;NA;0.001;Polyommatus icarus;0.971665478142064;  
MW502821;Lepidoptera;Erebia mnestra;Erebia mnestra;0.001;Erebia mnestra;0.999937560187875;  
MW502822;Lepidoptera;Hipparchia fagi;NA;NA;Hipparchia fagi;0.882395021352844;

MW502823;Lepidoptera;Melitaea nevadensis;NA;0.001;NA;0.999999998712722;  
MW502825;Lepidoptera;Gonepteryx rhamni;NA;0.192;Gonepteryx rhamni;0.991002175992451;  
MW502827;Lepidoptera;Callophrys rubi;NA;0.002;Callophrys rubi;0.996974263478794;  
MW502828;Lepidoptera;Coenonympha glycerion;NA;0.295;Coenonympha glycerion;0.999998958157621;  
MW502829;Lepidoptera;Colias crocea;NA;0.059;NA;0.99999999999738;  
MW502832;Lepidoptera;Coenonympha pamphilus;Coenonympha pamphilus;1;Coenonympha  
pamphilus;0.99999999999886;  
MW502835;Lepidoptera;Pyrgus armoricanus;Pyrgus armoricanus;1;Pyrgus  
armoricanus;0.999997353848817;  
MW502837;Lepidoptera;Brenthis daphne;Brenthis daphne;0.001;Brenthis daphne;0.996209297077896;  
MW502838;Lepidoptera;Erebia medusa polaris;NA;0.009;Erebia medusa;0.986275612856827;  
MW502840;Lepidoptera;Gonepteryx rhamni;NA;0.181;Gonepteryx rhamni;0.985430786358543;  
MW502842;Lepidoptera;Plebejus argyrognomon;NA;0.001;NA;0.994620093546684;  
MW502843;Lepidoptera;Hyponephele lycaon;Hyponephele lycaon;1;Hyponephele  
lycaon;0.99999998298193;  
MW502846;Lepidoptera;Argynnis aglaja;NA;NA;Speyeria aglaja;0.872991147917853;  
MW502848;Lepidoptera;Pyrgus armoricanus;Pyrgus armoricanus;1;Pyrgus  
armoricanus;0.999997353848817;  
MW502850;Lepidoptera;Lycaena thersamon;NA;NA;Lycaena thersamon;0.969135324846213;  
MW502851;Lepidoptera;Coenonympha rhodopensis;NA;0.029;Coenonympha rhodopensis;0.880788896557773;  
MW502854;Lepidoptera;Colias palaeno;NA;NA;NA;0.99999998051059;  
MW502855;Lepidoptera;Erebia medusa polaris;NA;0.009;Erebia medusa;0.986275612856827;  
MW502856;Lepidoptera;Pyrgus alveus;NA;0.002;Pyrgus alveus;0.870345790667288;  
MW502858;Lepidoptera;Thymelicus lineola;Thymelicus lineola;1;Thymelicus  
lineola;0.999987745280407;  
MW502859;Lepidoptera;Cupido osiris;Cupido osiris;1;Cupido osiris;0.999998710927265;  
MW502860;Lepidoptera;Erebia manto;NA;NA;Erebia manto;0.99806454933995;  
MW502861;Lepidoptera;Anthocharis cardamines;Anthocharis cardamines;1;Anthocharis  
cardamines;0.999999934410001;  
MW502862;Lepidoptera;Polyommatus icarus;NA;0.001;Polyommatus icarus;0.974455446201716;  
MW502864;Lepidoptera;Melanargia galathea;NA;NA;Melanargia galathea;0.921321492507296;  
MW502865;Lepidoptera;Favonius quercus;NA;NA;Favonius quercus;0.73046069582187;  
MW502866;Lepidoptera;Arethusana arethusa;Arethusana arethusa;0.001;Arethusana  
arethusa;0.999999488009326;  
MW502867;Lepidoptera;Boloria graeca;Boloria graeca;1;Boloria graeca;0.999999912715485;  
MW502868;Lepidoptera;Coenonympha arcania;NA;0.001;NA;0.99999999999975;  
MW502869;Lepidoptera;Boloria pales;Boloria pales;0.972;Boloria pales;0.996859116493867;  
MW502870;Lepidoptera;Erebia ottomana;Erebia ottomana;1;Erebia ottomana;0.999999994283371;  
MW502872;Lepidoptera;Erebia pandrose;Erebia pandrose;NA;Erebia pandrose;0.956509272964271;  
MW502874;Lepidoptera;Vanessa atalanta;Vanessa atalanta;1;Vanessa atalanta;0.99999999757762;  
MW502875;Lepidoptera;Pyrgus sidae;Pyrgus sidae;1;Pyrgus sidae;0.99996750457282;  
MW502876;Lepidoptera;Vanessa atalanta;Vanessa atalanta;1;Vanessa atalanta;0.999999997804338;  
MW502877;Lepidoptera;Hipparchia fagi;NA;NA;Hipparchia fagi;0.93698925414046;  
MW502878;Lepidoptera;Lycaena tityrus;Lycaena tityrus;1;Lycaena tityrus;0.999998928238034;  
MW502880;Lepidoptera;Boloria euphrosyne;Boloria euphrosyne;NA;Boloria  
euphrosyne;0.999930950530325;  
MW502882;Lepidoptera;Plebejus idas;Plebejus idas;0.001;NA;0.999244225095053;  
MW502884;Lepidoptera;Gonepteryx rhamni;Gonepteryx rhamni;0.004;Gonepteryx  
rhamni;0.999475611279998;  
MW502886;Lepidoptera;Polyommatus damon;Polyommatus damon;1;Polyommatus damon;0.999999555418909;  
MW502888;Lepidoptera;Boloria selene;NA;0.064;Boloria selene;0.99999700362042;  
MW502889;Lepidoptera;Erebia pharte;Erebia pharte;1;Erebia pharte;0.9999999765879;  
MW502891;Lepidoptera;Cyaniris semiargus;NA;NA;Cyaniris semiargus;0.998432622541352;  
MW502893;Lepidoptera;Carterocephalus palaemon;NA;0.052;Carterocephalus  
palaemon;0.728445051795325;  
MW502895;Lepidoptera;Carcharodus alceae;Carcharodus alceae;0.999;Carcharodus  
alceae;0.99999998321016;  
MW502898;Lepidoptera;Erebia euryale;NA;NA;Erebia euryale;0.889230517271439;  
MW502901;Lepidoptera;Minois dryas;NA;0.025;Minois dryas;0.850746026247397;  
MW502904;Lepidoptera;Colias alfacariensis;Colias alfacariensis;0.001;Colias  
alfacariensis;0.999966522684745;  
MW502905;Lepidoptera;Cyaniris semiargus;NA;NA;Cyaniris semiargus;0.999051841766953;  
MW502906;Lepidoptera;Thymelicus lineola;Thymelicus lineola;1;Thymelicus  
lineola;0.999995927238524;  
MW502907;Lepidoptera;Cupido minimus;NA;0.009;Cupido minimus;0.999791453712643;  
MW502908;Lepidoptera;Aphantopus hyperantus;Aphantopus hyperantus;0.003;Aphantopus  
hyperantus;0.99999455871523;  
MW502909;Lepidoptera;Coenonympha arcania;Coenonympha gardetta;0.001;Coenonympha  
gardetta;0.794175697342215;  
MW502910;Lepidoptera;Fabriciana adippe;Fabriciana adippe;0.028;Fabriciana  
adippe;0.969769198942097;  
MW502912;Lepidoptera;Aglais urticae;Aglais urticae;0.001;Aglais urticae;0.990690600684087;  
MW502913;Lepidoptera;Fabriciana adippe;Fabriciana adippe;0.007;Fabriciana  
adippe;0.876018745965171;  
MW502914;Lepidoptera;Maniola jurtina;NA;0.038;NA;0.99999999999524;  
MW502915;Lepidoptera;Coenonympha pamphilus;Coenonympha pamphilus;1;Coenonympha  
pamphilus;0.99999999999744;  
MW502916;Lepidoptera;Erebia euryale;NA;NA;Erebia euryale;0.889230517271439;

MW502918;Lepidoptera;Lampides boeticus;Lampides boeticus;1;Lampides boeticus;0.999999999468656;  
MW502919;Lepidoptera;Pieris napi;NA;NA;Pieris napi;0.929591877726186;  
MW502922;Lepidoptera;Aricia nicias;Aricia nicias;0.997;Aricia nicias;0.999116086568869;  
MW502923;Lepidoptera;Boloria pales;Boloria pales;0.998;Boloria pales;0.996520205418986;  
MW502925;Lepidoptera;Polyommatus escheri;Polyommatus escheri;1;Polyommatus  
escheri;0.999999122411013;  
MW502926;Lepidoptera;Thecla betulae;Thecla betulae;1;Thecla betulae;0.99999999949353;  
MW502928;Lepidoptera;Carterocephalus palaemon;Carterocephalus palaemon;0.013;Carterocephalus  
palaemon;0.795574350711358;  
MW502930;Lepidoptera;Carcharodus alceae;Carcharodus alceae;0.999;Carcharodus  
alceae;0.999999998008462;  
MW502931;Lepidoptera;Thymelicus lineola;Thymelicus lineola;1;Thymelicus  
lineola;0.999995927238524;  
MW502932;Lepidoptera;Coenonympha glycerion;NA;0.28;Coenonympha glycerion;0.999998036263913;  
MW502935;Lepidoptera;Limenitis populi;Limenitis populi;1;Limenitis populi;0.99999999859654;  
MW502936;Lepidoptera;Aphantopus hyperantus;Aphantopus hyperantus;0.002;Aphantopus  
hyperantus;0.999999300149444;  
MW502937;Lepidoptera;Carterocephalus palaemon;NA;0.02;NA;0.999999999999341;  
MW502938;Lepidoptera;Erebia manto;NA;NA;Erebia manto;0.997987265120514;  
MW502940;Lepidoptera;Agriades glandon;NA;0.001;Agriades glandon;0.984702458061847;  
MW502941;Lepidoptera;Aricia agestis;NA;0.253;Aricia agestis;0.996350017387504;  
MW502942;Lepidoptera;Lycaena phlaeas;Lycaena phlaeas;1;Lycaena phlaeas;0.999999994740023;  
MW502943;Lepidoptera;Satyrium acaciae;Satyrium acaciae;1;Satyrium acaciae;0.99999754684667;  
MW502944;Lepidoptera;Erebia pronoe;Erebia pronoe;0.001;Erebia pronoe;0.999412757816713;  
MW502946;Lepidoptera;Polyommatus daphnis;Polyommatus daphnis;1;Polyommatus  
daphnis;0.99984762749267;  
MW502951;Lepidoptera;Celastrina argiolus;Celastrina argiolus;1;Celastrina  
argiolus;0.999527385150531;  
MW502955;Lepidoptera;Maniola jurtina;NA;0.001;Maniola jurtina;0.939220105860875;  
MW502956;Lepidoptera;Helleia helle;Lycaena helle;1;Lycaena helle;0.999999993533947;  
MW502957;Lepidoptera;Cupido argiades;NA;0.499;NA;0.999999999984682;  
MW502959;Lepidoptera;Euphydryas maturna;NA;NA;Euphydryas maturna;0.957925789833158;  
MW502960;Lepidoptera;Polyommatus eros;NA;0.005;Polyommatus eros;0.962873614249808;  
MW502961;Lepidoptera;Boloria selene;NA;0.109;Boloria selene;0.999997425298705;  
MW502962;Lepidoptera;Boloria selene;NA;0.098;Boloria selene;0.999999594775514;  
MW502963;Lepidoptera;Lycaena tityrus;Lycaena tityrus;1;Lycaena tityrus;0.999995729087172;  
MW502964;Lepidoptera;Erebia montana;Erebia montana;1;Erebia montana;0.999901488545922;  
MW502965;Lepidoptera;Thymelicus sylvestris;NA;0.131;Thymelicus sylvestris;0.999961574491035;  
MW502966;Lepidoptera;Pyrgus cacaliae;Pyrgus cacaliae;0.001;Pyrgus cacaliae;0.997779968725098;  
MW502968;Lepidoptera;Melanargia galathea;NA;NA;Melanargia galathea;0.943593560237409;  
MW502970;Lepidoptera;Pyrgus sidae;Pyrgus sidae;1;Pyrgus sidae;0.99999311394709;  
MW502971;Lepidoptera;Coenonympha glycerion;NA;0.284;Coenonympha glycerion;0.999998676061348;  
MW502973;Lepidoptera;Erebia oeme;NA;0.039;Erebia oeme;0.99999999644785;  
MW502977;Lepidoptera;Aphantopus hyperantus;Aphantopus hyperantus;0.003;Aphantopus  
hyperantus;0.999999455871523;  
MW502979;Lepidoptera;Coenonympha gardetta;NA;0.001;NA;0.999999999999975;  
MW502981;Lepidoptera;Pyrgus armoricanus;Pyrgus armoricanus;1;Pyrgus  
armoricanus;0.997478680096412;  
MW502982;Lepidoptera;Lycaena phlaeas;Lycaena phlaeas;1;Lycaena phlaeas;0.999999991647343;  
MW502983;Lepidoptera;Pyrgus andromedae;Pyrgus andromedae;1;Pyrgus andromedae;0.999808671605833;  
MW502987;Lepidoptera;Colias alfacariensis;Colias alfacariensis;1;Colias  
alfacariensis;0.999949385153777;  
MW502989;Lepidoptera;Aricia eumedon;Eumedonia eumedon;0.002;Eumedonia eumedon;0.998062893323354;  
MW502990;Lepidoptera;Boloria selene;NA;0.001;Boloria selene;0.999995370701811;  
MW502992;Lepidoptera;Pyrgus andromedae;NA;0.002;Pyrgus andromedae;0.989684399291934;  
MW502996;Lepidoptera;Gonepteryx rhamni;Gonepteryx rhamni;0.008;Gonepteryx  
rhamni;0.999527533936108;  
MW502999;Lepidoptera;Cupido argiades;NA;0.499;NA;0.999999999984682;  
MW503000;Lepidoptera;Satyrium spini;Satyrium spini;1;Satyrium spini;0.999999671884919;  
MW503001;Lepidoptera;Argynnis paphia;Argynnis paphia;1;Argynnis paphia;0.999999991389927;  
MW503004;Lepidoptera;Nymphalis c-album;NA;0.215;NA;0.999999192918557;  
MW503007;Lepidoptera;Euphydryas intermedia;NA;NA;NA;0.999999999996973;  
MW503009;Lepidoptera;Favonius quercus;NA;NA;Favonius quercus;0.73046069582187;  
MW503010;Lepidoptera;Colias crocea;NA;0.059;NA;0.999999999999738;  
MW503011;Lepidoptera;Euphydryas cynthia;Euphydryas cynthia;1;Euphydryas  
cynthia;0.999999999587885;  
MW503015;Lepidoptera;Favonius quercus;NA;NA;Favonius quercus;0.73046069582187;  
MW503017;Lepidoptera;Colias phicomone;NA;0.001;Colias phicomone;0.985598879697681;  
MW503021;Lepidoptera;Favonius quercus;NA;NA;NA;0.999999999998176;  
MW503023;Lepidoptera;Carcharodus lavatherae;NA;0.108;Carcharodus lavatherae;0.998927718400682;  
MW503028;Lepidoptera;Nymphalis io;NA;0.491;Aglais io;0.930153237246992;  
MW503029;Lepidoptera;Melitaea didyma;Melitaea didyma;1;Melitaea didyma;0.99990369529223;  
MW503031;Lepidoptera;Fabriciana niobe;NA;0.005;Fabriciana niobe;0.992125835358755;  
MW503036;Lepidoptera;Colias alfacariensis;Colias alfacariensis;0.001;Colias  
alfacariensis;0.999966522684745;  
MW503040;Lepidoptera;Cupido minimus;NA;0.009;Cupido minimus;0.999791453712643;  
MW503041;Lepidoptera;Cyaniris semiargus;NA;NA;Cyaniris semiargus;0.99903926220317;  
MW503042;Lepidoptera;Pyrgus warrenensis;NA;0.001;Pyrgus warrenensis;0.748603008865855;



MW503043;Lepidoptera;Argynnis aglaja;NA;NA;NA;0.999999999996955;  
MW503045;Lepidoptera;Erebia styx;NA;NA;Erebia styx;0.890739244956497;  
MW503046;Lepidoptera;Pyrgus armoricanus;Pyrgus armoricanus;1;Pyrgus armoricanus;0.99700549775422;  
MW503047;Lepidoptera;Pieris napi;NA;NA;Pieris napi;0.883162684455157;  
MW503048;Lepidoptera;Lycaena virgaureae;NA;0.073;Lycaena virgaureae;0.9995563158025;  
MW503049;Lepidoptera;Colias crocea;NA;0.059;NA;0.99999999999738;  
MW503050;Lepidoptera;Erebia euryale;NA;NA;Erebia euryale;0.919518760623792;  
MW503054;Lepidoptera;Aglais urticae;NA;0.002;Aglais urticae;0.987497593219019;  
MW503055;Lepidoptera;Satyrium acaciae;Satyrium acaciae;1;Satyrium acaciae;0.999999951077798;  
MW503058;Lepidoptera;Polyommatus dolus;NA;0.036;Polyommatus dolus;0.864294911564264;  
MW503061;Lepidoptera;Melitaea diamina;NA;0.305;Melitaea diamina;0.999999994065661;  
MW503062;Lepidoptera;Hipparchia aristaeus;NA;0.001;NA;0.99999999999883;  
MW503066;Lepidoptera;Plebejus idas;NA;0.007;NA;0.999546324331549;  
MW503067;Lepidoptera;Boloria pales;Boloria pales;0.998;Boloria pales;0.996520205418986;  
MW503068;Lepidoptera;Brenthis ino;Brenthis ino;0.001;Brenthis ino;0.994711912827522;  
MW503069;Lepidoptera;Maniola jurtina;NA;0.001;Maniola jurtina;0.939220105860875;  
MW503073;Lepidoptera;Aricia agestis;NA;NA;Aricia agestis;0.995603818140756;  
MW503076;Lepidoptera;Melitaea nevadensis;NA;NA;NA;0.99999999828008;  
MW503077;Lepidoptera;Gonepteryx cleopatra;Gonepteryx cleopatra;0.998;Gonepteryx cleopatra;0.999118636582266;  
MW503078;Lepidoptera;Aphantopus hyperantus;Aphantopus hyperantus;0.003;Aphantopus hyperantus;0.99999455871523;  
MW503080;Lepidoptera;Maniola jurtina;NA;0.001;Maniola jurtina;0.939220105860875;  
MW503081;Lepidoptera;Colias crocea;NA;0.059;NA;0.99999999999738;  
MW503082;Lepidoptera;Cupido argiades;NA;0.001;NA;0.99999999967358;  
MW503087;Lepidoptera;Celastrina argiolus;Celastrina argiolus;1;Celastrina argiolus;0.999708846309046;  
MW503088;Lepidoptera;Pyrgus cacaliae;Pyrgus cacaliae;0.001;Pyrgus cacaliae;0.99354498208327;  
MW503089;Lepidoptera;Plebejus argyrognomon;NA;0.001;NA;0.994620093546684;  
MW503090;Lepidoptera;Arethusana arethusa;NA;0.061;Arethusana arethusa;0.99978617515291;  
MW503091;Lepidoptera;Pyrgus warrenensis;NA;0.003;NA;0.99999999997732;  
MW503093;Lepidoptera;Hipparchia semele;NA;0.002;Hipparchia semele;0.807780383202924;  
MW503095;Lepidoptera;Cercyonis lupina;Hyponephele lupina;1;Hyponephele lupina;0.99999996538935;  
MW503097;Lepidoptera;Nymphalis io;NA;0.461;Aglais io;0.823631283162492;  
MW503098;Lepidoptera;Maniola jurtina;NA;0.001;Maniola jurtina;0.939220105860875;  
MW503099;Lepidoptera;Melanargia galathea;Melanargia galathea;0.001;Melanargia galathea;0.98234378567775;  
MW503100;Lepidoptera;Polyommatus daphnis;NA;0.062;Polyommatus daphnis;0.995724017767077;  
MW503101;Lepidoptera;Lycaena phlaeas;Lycaena phlaeas;1;Lycaena phlaeas;0.999999996363186;  
MW503102;Lepidoptera;Erebia pronoe;NA;NA;NA;0.99999999898693;  
MW503107;Lepidoptera;Pyrgus alveus;NA;0.003;NA;0.99999999997732;  
MW503109;Lepidoptera;Aphantopus hyperantus;Aphantopus hyperantus;0.004;Aphantopus hyperantus;0.999598909345147;  
MW503110;Lepidoptera;Erebia oeme;NA;NA;Erebia oeme;0.999999999850758;  
MW503112;Lepidoptera;Erebia stiria;NA;NA;NA;0.99999999970959;  
MW503113;Lepidoptera;Erebia melampus;Erebia melampus;NA;Erebia melampus;0.950990028966024;  
MW503114;Lepidoptera;Coenonympha glycerion;NA;0.093;Coenonympha glycerion;0.999998165483226;  
MW503120;Lepidoptera;Lysandra coridon;NA;NA;NA;0.99769329842069;  
MW503121;Lepidoptera;Lycaena tityrus;Lycaena tityrus;1;Lycaena tityrus;0.999998928238034;  
MW503122;Lepidoptera;Polyommatus amandus;Polyommatus amandus;0.003;Polyommatus amandus;0.999980071833264;  
MW503125;Lepidoptera;Carcharodus lavatherae;NA;0.197;Carcharodus lavatherae;0.997920355172773;  
MW503129;Lepidoptera;Erebia styx;NA;NA;Erebia styx;0.962664978932439;  
MW503130;Lepidoptera;Hipparchia aristaeus;NA;0.001;Hipparchia semele;0.853913503436074;  
MW503131;Lepidoptera;Melitaea nevadensis;NA;0.311;Melitaea celadussa;0.765425086035;  
MW503134;Lepidoptera;Aricia artaxerxes;Plebejus argus;1;Aricia artaxerxes;0.999743187199922;  
MW503136;Lepidoptera;Aricia eumedon;NA;0.054;Eumedonia eumedon;0.997429303960375;  
MW503140;Lepidoptera;Lampides boeticus;Lampides boeticus;1;Lampides boeticus;0.99999999545906;  
MW503141;Lepidoptera;Aricia artaxerxes;NA;0.001;Aricia artaxerxes;0.998546425606378;  
MW503142;Lepidoptera;Pieris napi;NA;0.008;Pieris napi;0.840314219469586;  
MW503144;Lepidoptera;Hipparchia semele;NA;0.006;NA;0.99999999999933;  
MW503145;Lepidoptera;Lycaena tityrus;Lycaena tityrus;1;Lycaena tityrus;0.999996745430631;  
MW503147;Lepidoptera;Aricia eumedon;Eumedonia eumedon;0.003;Eumedonia eumedon;0.998278637613531;  
MW503148;Lepidoptera;Euphydryas cynthia;Euphydryas cynthia;1;Euphydryas cynthia;0.99999999705039;  
MW503149;Lepidoptera;Erynnis tages;Erynnis tages;1;Erynnis tages;0.99999281987018;  
MW503154;Lepidoptera;Melitaea nevadensis;NA;0.002;NA;0.99999999925082;  
MW503155;Lepidoptera;Hipparchia semele;NA;0.002;Hipparchia semele;0.807780383202924;  
MW503156;Lepidoptera;Pieris napi;NA;0.011;Pieris napi;0.801985394724814;  
MW503157;Lepidoptera;Erebia euryale;NA;NA;Erebia euryale;0.919518760623792;  
MW503158;Lepidoptera;Thecla betulae;Thecla betulae;1;Thecla betulae;0.99999999972886;  
MW503159;Lepidoptera;Erebia euryale;NA;NA;Erebia euryale;0.93493911427573;  
MW503160;Lepidoptera;Erebia pluto;Erebia pluto;1;Erebia pluto;0.999999948555599;  
MW503161;Lepidoptera;Erebia oeme;NA;0.114;Erebia oeme;0.99999999830635;  
MW503167;Lepidoptera;Chazara briseis;NA;0.918;Chazara briseis;0.999965264690991;  
MW503168;Lepidoptera;Hipparchia aristaeus;NA;0.001;Hipparchia semele;0.853913503436074;  
MW503170;Lepidoptera;Pyrgus alveus;NA;0.003;NA;0.99999999998162;

MW503171;Lepidoptera;Gegenes pumilio;Gegenes pumilio;1;Gegenes pumilio;0.999986726679266;  
MW503173;Lepidoptera;Boloria euphrosyne;Boloria euphrosyne;0.001;Boloria  
euphrosyne;0.999985640170951;  
MW503174;Lepidoptera;Pyrgus cacaliae;Pyrgus cacaliae;0.001;Pyrgus cacaliae;0.996551251945509;  
MW503179;Lepidoptera;Pyrgus warrenensis;NA;0.003;NA;0.99999999997732;  
MW503183;Lepidoptera;Aricia eumedon;Eumedonia eumedon;0.002;Eumedonia eumedon;0.997434540282035;  
MW503184;Lepidoptera;Nymphalis io;NA;0.491;Aglais io;0.930153237246992;  
MW503185;Lepidoptera;Agriades orbitulus;NA;0.031;Agriades orbitulus;0.998409903321215;  
MW503187;Lepidoptera;Erynnis tages;Erynnis tages;1;Erynnis tages;0.99999281987018;  
MW503188;Lepidoptera;Pyrgus armoricanus;Pyrgus armoricanus;1;Pyrgus  
armoricanus;0.997478680096412;  
MW503192;Lepidoptera;Hamearis lucina;NA;NA;Hamearis lucina;0.99999999953019;  
MW503193;Lepidoptera;Aphantopus hyperantus;Aphantopus hyperantus;0.003;Aphantopus  
hyperantus;0.99999455871523;  
MW503194;Lepidoptera;Thymelicus acteon;Thymelicus acteon;1;Thymelicus acteon;0.9999999752248;  
MW503195;Lepidoptera;Lysandra coridon;NA;NA;NA;0.990215158133427;  
MW503197;Lepidoptera;Euphydryas cynthia;Euphydryas cynthia;1;Euphydryas  
cynthia;0.99999999708848;  
MW503198;Lepidoptera;Polyommatus damon;Polyommatus damon;1;Polyommatus damon;0.99999349371605;  
MW503201;Lepidoptera;Plebejus idas;NA;0.007;NA;0.999546324331549;  
MW503202;Lepidoptera;Pyrgus alveus;NA;0.003;NA;0.99999999997732;  
MW503203;Lepidoptera;Polyommatus escheri;Polyommatus escheri;1;Polyommatus  
escheri;0.999994156826706;  
MW503204;Lepidoptera;Pyrgus armoricanus;Pyrgus armoricanus;1;Pyrgus  
armoricanus;0.99997353848817;  
MW503208;Lepidoptera;Hipparchia semele;NA;0.001;Hipparchia semele;0.771941503847146;  
MW503215;Lepidoptera;Aricia artaxerxes;NA;0.394;Aricia artaxerxes;0.999502890976379;  
MW503216;Lepidoptera;Parnassius apollo;Parnassius apollo;1;Parnassius apollo;0.992704703916692;  
MW503217;Lepidoptera;Boloria pales;Boloria pales;1;Boloria pales;0.99780899867633;  
MW503222;Lepidoptera;Erebia melampus;Erebia melampus;0.011;Erebia melampus;0.975499903768874;  
MW503224;Lepidoptera;Erebia pluto;Erebia pluto;1;Erebia pluto;0.9999999442598;  
MW503226;Lepidoptera;Melitaea diamina;NA;0.305;Melitaea diamina;0.999999994065661;  
MW503227;Lepidoptera;Erebia pandrose;Erebia pandrose;0.013;Erebia pandrose;0.974388092470716;  
MW503228;Lepidoptera;Pyrgus alveus;NA;0.003;NA;0.99999999997732;  
MW503229;Lepidoptera;Boloria pales;NA;0.002;Boloria pales;0.994357012737945;  
MW503231;Lepidoptera;Polyommatus icarus;Polyommatus icarus;0.001;Polyommatus  
icarus;0.999851522482238;  
MW503232;Lepidoptera;Lycaena tityrus;Lycaena tityrus;1;Lycaena tityrus;0.999998928238034;  
MW503235;Lepidoptera;Favonius quercus;NA;NA;Favonius quercus;0.749488008187033;  
MW503243;Lepidoptera;Aphantopus hyperantus;Aphantopus hyperantus;0.002;Aphantopus  
hyperantus;0.99999300149444;  
MW503244;Lepidoptera;Boloria euphrosyne;Boloria euphrosyne;1;Boloria  
euphrosyne;0.999995261109009;  
MW503245;Lepidoptera;Satyrium spini;Satyrium spini;1;Satyrium spini;0.999999709284267;  
MW503246;Lepidoptera;Araschnia levana;Araschnia levana;1;Araschnia levana;0.99999848175332;  
MW503247;Lepidoptera;Erebia styx;NA;NA;Erebia styx;0.890739244956497;  
MW503249;Lepidoptera;Erebia ottomana;Erebia ottomana;1;Erebia ottomana;0.999999994283371;  
MW503251;Lepidoptera;Lycaena phlaeas;Lycaena phlaeas;1;Lycaena phlaeas;0.999999994740023;  
MW503253;Lepidoptera;Callophrys rubi;NA;0.001;Callophrys rubi;0.99440144595357;  
MW503254;Lepidoptera;Cercyonis lupina;Hyponphele lupina;1;Hyponphele lupina;0.999999886513599;  
MW503256;Lepidoptera;Hipparchia fagi;NA;NA;Hipparchia fagi;0.942857264035062;  
MW503257;Lepidoptera;Erebia ottomana;Erebia ottomana;1;Erebia ottomana;0.999999994283371;  
MW503259;Lepidoptera;Nymphalis c-album;NA;0.215;NA;0.999999192918557;  
MW503260;Lepidoptera;Coenonympha gardetta;NA;0.001;Coenonympha gardetta;0.713066049778398;  
MW503263;Lepidoptera;Erebia montana;Erebia montana;1;Erebia montana;0.999729617216394;  
MW503265;Lepidoptera;Polyommatus icarus;NA;0.13;Polyommatus icarus;0.979762695748748;  
MW503267;Lepidoptera;Polyommatus daphnis;NA;0.003;Polyommatus daphnis;0.991006529620738;  
MW503271;Lepidoptera;Pyrgus sidae;Pyrgus sidae;1;Pyrgus sidae;0.99999311394709;  
MW503272;Lepidoptera;Euphydryas aurinia;NA;0.31;Euphydryas aurinia;0.993387708761386;  
MW503273;Lepidoptera;Ochlodes sylvanus;NA;0.316;Ochlodes sylvanus;0.996318754838625;  
MW503274;Lepidoptera;Pyrgus foulquieri;NA;NA;Pyrgus alveus;0.827119616974978;  
MW503280;Lepidoptera;Erebia ottomana;Erebia ottomana;1;Erebia ottomana;0.999999994283371;  
MW503282;Lepidoptera;Heteropterus morpheus;NA;NA;Heteropterus morpheus;0.99999999999943;  
MW503283;Lepidoptera;Boloria pales;Boloria pales;1;Boloria pales;0.996033568987017;  
MW503284;Lepidoptera;Satyrium spini;Satyrium spini;1;Satyrium spini;0.999999496031491;  
MW503285;Lepidoptera;Hipparchia leighebi;Hipparchia leighebi;0.001;Hipparchia  
leighebi;0.895276239441079;  
MW503286;Lepidoptera;Glaucopteryx alexis;NA;NA;Glaucopteryx alexis;0.979381169624069;  
MW503287;Lepidoptera;Ochlodes sylvanus;NA;0.316;Ochlodes sylvanus;0.996318754838625;  
MW503288;Lepidoptera;Plebejus argyrognomon;NA;0.001;NA;0.994620093546684;  
MW503289;Lepidoptera;Boloria thore;Boloria thore;1;Boloria thore;0.99999998359726;  
MW503290;Lepidoptera;Thymelicus sylvestris;Thymelicus sylvestris;1;Thymelicus  
sylvestris;0.99999981568351;  
MW503291;Lepidoptera;Thymelicus lineola;Thymelicus lineola;1;Thymelicus  
lineola;0.999995927238524;  
MW503293;Lepidoptera;Aglais urticae;NA;NA;Aglais urticae;0.986507754198484;  
MW503294;Lepidoptera;Cyaniris semiargus;NA;NA;Cyaniris semiargus;0.998474211845289;  
MW503295;Lepidoptera;Pyrgus andromedae;Pyrgus andromedae;1;Pyrgus andromedae;0.999808671605833;

MW503296;Lepidoptera;Thymelicus lineola;Thymelicus lineola;1;Thymelicus lineola;0.99997574863308;

MW503298;Lepidoptera;Anthocharis cardamines;Anthocharis cardamines;1;Anthocharis cardamines;0.999999940675226;

MW503300;Lepidoptera;Anthocharis damone;Anthocharis damone;0.001;Anthocharis damone;0.999977961350188;

MW503301;Lepidoptera;Agriades optilete;Agriades optilete;1;Agriades optilete;0.99999999183251;

MW503303;Lepidoptera;Colias palaeno;NA;0.002;NA;0.99999999983681;

MW503305;Lepidoptera;Erebia medusa;NA;0.04;Erebia medusa;0.984042649596477;

MW503306;Lepidoptera;Brenthis ino;Brenthis ino;0.014;Brenthis ino;0.978751936695286;

MW503309;Lepidoptera;Coenonympha arcania;NA;0.001;NA;0.99999999999975;

MW503310;Lepidoptera;Vanessa atalanta;Vanessa atalanta;1;Vanessa atalanta;0.999999999469622;

MW503312;Lepidoptera;Pyrgus andromedae;Pyrgus andromedae;1;Pyrgus andromedae;0.999808671605833;

MW503314;Lepidoptera;Coenonympha glycerion;NA;0.295;Coenonympha glycerion;0.999998958157621;

MW503315;Lepidoptera;Melitaea varia;Melitaea varia;1;Melitaea varia;0.999992357528001;

MW503318;Lepidoptera;Cupido minimus;NA;0.009;Cupido minimus;0.999791453712643;

MW503322;Lepidoptera;Cupido argiades;NA;0.499;NA;0.99999999984682;

MW503325;Lepidoptera;Pyrgus alveus;NA;NA;Pyrgus alveus;0.941697735568124;

MW503326;Lepidoptera;Scolitantides orion;Scolitantides orion;1;Scolitantides orion;0.99999984804305;

MW503327;Lepidoptera;Erebia pandrose;Erebia pandrose;NA;Erebia pandrose;0.956509272964271;

MW503328;Lepidoptera;Erebia tyndarus;NA;0.001;Erebia tyndarus;0.760860810235653;

MW503329;Lepidoptera;Colias hyale;Colias hyale;0.015;Colias hyale;0.99997884296128;

MW503330;Lepidoptera;Thymelicus sylvestris;Thymelicus sylvestris;1;Thymelicus sylvestris;0.99999876153052;

MW503333;Lepidoptera;Lysandra coridon;NA;NA;NA;0.999612187856343;

MW503334;Lepidoptera;Maniola jurtina;NA;NA;NA;0.99999999985062;

MW503335;Lepidoptera;Lycaena tityrus;Lycaena tityrus;1;Lycaena tityrus;0.999995729087172;

MW503336;Lepidoptera;Aphantopus hyperantus;Aphantopus hyperantus;0.006;Aphantopus hyperantus;0.999999005623874;

MW503337;Lepidoptera;Vanessa atalanta;Vanessa atalanta;1;Vanessa atalanta;0.99999999757762;

MW503338;Lepidoptera;Coenonympha gardetta;NA;0.12;NA;0.99999999999993;

MW503339;Lepidoptera;Favonius quercus;NA;NA;Favonius quercus;0.73046069582187;

MW503341;Lepidoptera;Fabriciana adippe;Fabriciana adippe;0.028;Fabriciana adippe;0.969769198942097;

MW503342;Lepidoptera;Cercyonis lupina;Hyponphele lupina;1;Hyponphele lupina;0.999999869009039;

MW503345;Lepidoptera;Thymelicus sylvestris;Thymelicus sylvestris;1;Thymelicus sylvestris;0.999999985935205;

MW503346;Lepidoptera;Parnassius apollo;Parnassius apollo;NA;Parnassius apollo;0.998493452074066;

MW503350;Lepidoptera;Aphantopus hyperantus;Aphantopus hyperantus;0.006;Aphantopus hyperantus;0.999998615504572;

MW503351;Lepidoptera;Erebia manto;NA;NA;Erebia manto;0.999021390463069;

MW503352;Lepidoptera;Arethusana arethusa;NA;0.153;Arethusana arethusa;0.999652039046744;

MW503353;Lepidoptera;Coenonympha rhodopensis;NA;0.001;Coenonympha rhodopensis;0.897626687681828;

MW503358;Lepidoptera;Plebejus idas;Plebejus idas;0.001;NA;0.999436143300552;

MW503360;Lepidoptera;Cupido argiades;NA;0.499;NA;0.99999999984682;

MW503361;Lepidoptera;Polyommatus icarus;NA;0.001;Polyommatus icarus;0.981285528541973;

MW503362;Lepidoptera;Hipparchia fidia;Hipparchia fidia;1;Hipparchia fidia;0.99999999999915;

MW503363;Lepidoptera;Aricia agestis;NA;0.067;Aricia agestis;0.999509743227786;

MW503366;Lepidoptera;Aphantopus hyperantus;Aphantopus hyperantus;0.002;Aphantopus hyperantus;0.999999300149444;

MW503367;Lepidoptera;Aricia cramera;Aricia cramera;0.001;Aricia cramera;0.999920664957981;

MW503368;Lepidoptera;Thecla betulae;Thecla betulae;1;Thecla betulae;0.99999999748724;

MW503369;Lepidoptera;Lysandra coridon;Lysandra coridon;NA;Lysandra coridon;0.735779770406819;

MW503370;Lepidoptera;Vanessa atalanta;Vanessa atalanta;1;Vanessa atalanta;0.99999999297358;

MW503371;Lepidoptera;Polyommatus amandus;Polyommatus amandus;0.003;Polyommatus amandus;0.999980071833264;

MW503372;Lepidoptera;Thymelicus lineola;Thymelicus lineola;1;Thymelicus lineola;0.999971535093703;

MW503373;Lepidoptera;Colias hyale;NA;0.488;Colias hyale;0.999915488936852;

MW503376;Lepidoptera;Polyommatus dorylas;Polyommatus dorylas;0.019;Polyommatus dorylas;0.997140737280767;

MW503383;Lepidoptera;Boloria euphrosyne;Boloria euphrosyne;0.001;Boloria euphrosyne;0.999985640170951;

MW503386;Lepidoptera;Melitaea didyma;Melitaea didyma;1;Melitaea didyma;0.995536640283604;

MW503389;Lepidoptera;Hipparchia sbordonii;NA;NA;Hipparchia semele;0.748345401572611;

MW503392;Lepidoptera;Celastrina argiolus;Celastrina argiolus;1;Celastrina argiolus;0.999527385150531;

MW503394;Lepidoptera;Polyommatus eros;NA;0.005;Polyommatus eros;0.95275169203039;

MW503395;Lepidoptera;Erebia pluto;Erebia pluto;1;Erebia pluto;0.999999921883617;

MW503396;Lepidoptera;Celastrina argiolus;Celastrina argiolus;1;Celastrina argiolus;0.999527385150531;

MW503397;Lepidoptera;Carcharodus alceae;NA;0.915;Carcharodus alceae;0.99999992000284;

MW503398;Lepidoptera;Melitaea diamina;NA;0.149;Melitaea diamina;0.99999996592464;

MW503399;Lepidoptera;Issoria lathonia;Issoria lathonia;NA;Issoria lathonia;0.99999999953189;

MW503400;Lepidoptera;Satyrium pruni;NA;0.076;Satyrium pruni;0.990322364021655;

MW503401;Lepidoptera;Coenonympha arcania;NA;0.172;Coenonympha arcania;0.963036309473038;

MW503402;Lepidoptera;Thymelicus sylvestris;Thymelicus sylvestris;1;Thymelicus sylvestris;0.99999876153052;  
MW503403;Lepidoptera;Thymelicus lineola;Thymelicus lineola;1;Thymelicus lineola;0.999977770665202;  
MW503404;Lepidoptera;Satyrium acaciae;Satyrium acaciae;1;Satyrium acaciae;0.999999951077798;  
MW503405;Lepidoptera;Lycaena thersamon;NA;NA;Lycaena thersamon;0.933284272031275;  
MW503407;Lepidoptera;Erebia melampus;Erebia melampus;NA;Erebia melampus;0.947570619386055;  
MW503408;Lepidoptera;Cupido argiades;NA;0.499;NA;0.99999999984682;  
MW503409;Lepidoptera;Lycaena phlaeas;Lycaena phlaeas;1;Lycaena phlaeas;0.999999996363186;  
MW503411;Lepidoptera;Plebejus idas;NA;0.001;NA;0.999344241503031;  
MW503413;Lepidoptera;Boloria thore;Boloria thore;1;Boloria thore;0.99999998359726;  
MW503414;Lepidoptera;Erebia styx;NA;NA;Erebia styx;0.890739244956497;  
MW503415;Lepidoptera;Pararge aegeria;Pararge aegeria;1;Pararge aegeria;0.99999999963165;  
MW503417;Lepidoptera;Ochlodes sylvanus;NA;0.316;Ochlodes sylvanus;0.996318754838625;  
MW503419;Lepidoptera;Erebia melampus;Erebia melampus;NA;Erebia melampus;0.947570619386055;  
MW503420;Lepidoptera;Melitaea nevadensis;NA;0.007;NA;0.99999999861988;  
MW503421;Lepidoptera;Carcharodus lavatherae;NA;0.333;Carcharodus lavatherae;0.99839243348919;  
MW503422;Lepidoptera;Hipparchia sbordonii;NA;0.001;NA;0.99999999999951;  
MW503423;Lepidoptera;Pieris napi;NA;NA;Pieris napi;0.954337147758801;  
MW503424;Lepidoptera;Aricia eumedon;Eumedonia eumedon;0.001;Eumedonia eumedon;0.999006696643375;  
MW503428;Lepidoptera;Polyommatus eros;NA;0.005;Polyommatus eros;0.95275169203039;  
MW503430;Lepidoptera;Nymphalis c-album;NA;0.215;NA;0.999999192918557;  
MW503432;Lepidoptera;Erebia manto;NA;NA;Erebia manto;0.999021390463069;  
MW503434;Lepidoptera;Polyommatus dorylas;Polyommatus dorylas;0.008;Polyommatus dorylas;0.991281865899703;  
MW503436;Lepidoptera;Hipparchia aristaeus;NA;0.004;Hipparchia semele;0.915414031491454;  
MW503437;Lepidoptera;Coenonympha arcania;NA;0.316;NA;0.99999999999985;  
MW503438;Lepidoptera;Coenonympha arcania;NA;0.001;NA;0.999999999999779;  
MW503439;Lepidoptera;Carcharodus lavatherae;NA;0.108;Carcharodus lavatherae;0.998927718400682;  
MW503442;Lepidoptera;Erebia oeme;NA;0.001;Erebia oeme;0.99999999718341;  
MW503443;Lepidoptera;Ochlodes sylvanus;NA;0.316;Ochlodes sylvanus;0.996318754838625;  
MW503444;Lepidoptera;Anthocharis damone;Anthocharis damone;0.001;Anthocharis damone;0.999977961350188;  
MW503448;Lepidoptera;Lycaena tityrus;Lycaena tityrus;1;Lycaena tityrus;0.999997027007808;  
MW503451;Lepidoptera;Coenonympha pamphilus;Coenonympha pamphilus;1;Coenonympha pamphilus;0.999999999999744;  
MW503453;Lepidoptera;Erebia epiphron;NA;NA;Erebia epiphron;0.994401488812176;  
MW503456;Lepidoptera;Euphydryas maturna;NA;0.126;Euphydryas maturna;0.885705216462044;  
MW503457;Lepidoptera;Plebejus idas;NA;0.002;NA;0.998900415846545;  
MW503458;Lepidoptera;Melitaea varia;Melitaea varia;1;Melitaea varia;0.999998939515614;  
MW503460;Lepidoptera;Plebejus idas;NA;0.007;NA;0.999546324331549;  
MW503462;Lepidoptera;Aricia artaxerxes;Plebejus argus;1;Aricia artaxerxes;0.999743187199922;  
MW503463;Lepidoptera;Carcharodus alceae;Carcharodus alceae;1;Carcharodus alceae;0.999999998465938;  
MW503466;Lepidoptera;Apatura iris;Apatura iris;1;Apatura iris;0.999999999999972;  
MW503470;Lepidoptera;Erebia ottomana;Erebia ottomana;1;Erebia ottomana;0.999999994283371;  
MW503471;Lepidoptera;Thymelicus sylvestris;NA;0.324;Thymelicus sylvestris;0.999940778442454;  
MW503473;Lepidoptera;Lysandra coridon;NA;NA;Lysandra coridon;0.997949615104622;  
MW503474;Lepidoptera;Maniola jurtina;NA;0.001;Maniola jurtina;0.939220105860875;  
MW503477;Lepidoptera;Erynnis tages;Erynnis tages;1;Erynnis tages;0.999998911453441;  
MW503479;Lepidoptera;Hamearis lucina;NA;NA;Hamearis lucina;0.99999999984141;  
MW503485;Lepidoptera;Erebia nivalis;NA;NA;NA;0.999999999999947;  
MW503486;Lepidoptera;Fabriciana niobe;NA;0.035;Fabriciana niobe;0.949480222958778;  
MW503488;Lepidoptera;Coenonympha pamphilus;Coenonympha pamphilus;1;Coenonympha pamphilus;0.999999999999744;  
MW503489;Lepidoptera;Thymelicus sylvestris;NA;0.042;Thymelicus sylvestris;0.9999626292829;  
MW503490;Lepidoptera;Erebia medusa;NA;0.006;Erebia medusa;0.990139653781612;  
MW503491;Lepidoptera;Lysandra coridon;NA;NA;Lysandra coridon;0.867027341345304;  
MW503493;Lepidoptera;Thymelicus sylvestris;NA;0.004;Thymelicus sylvestris;0.998308003514278;  
MW503494;Lepidoptera;Aphantopus hyperantus;Aphantopus hyperantus;0.004;Aphantopus hyperantus;0.999598909345147;  
MW503495;Lepidoptera;Coenonympha gardetta;NA;0.001;Coenonympha gardetta;0.731095812176462;  
MW503497;Lepidoptera;Plebejus argyrognomon;NA;0.001;NA;0.999938863896795;  
MW503499;Lepidoptera;Maniola jurtina;NA;0.012;Maniola jurtina;0.91755716175482;  
MW503500;Lepidoptera;Gegenes pumilio;Gegenes pumilio;1;Gegenes pumilio;0.999986726679266;  
MW503502;Lepidoptera;Cupido argiades;NA;0.499;NA;0.99999999984682;  
MW503503;Lepidoptera;Melitaea diamina;NA;0.305;Melitaea diamina;0.999999994065661;  
MW503505;Lepidoptera;Pyrgus alveus;NA;NA;Pyrgus alveus;0.922887984165083;  
MW503506;Lepidoptera;Pyrgus armoricanus;Pyrgus armoricanus;1;Pyrgus armoricanus;0.997478680096412;  
MW503511;Lepidoptera;Polyommatus icarus;NA;0.001;Polyommatus icarus;0.998394662811439;  
MW503515;Lepidoptera;Boloria dia;Boloria dia;1;Boloria dia;0.99999999980503;  
MW503516;Lepidoptera;Boloria titania;Boloria titania;0.015;Boloria titania;0.999877727909728;  
MW503518;Lepidoptera;Ochlodes sylvanus;NA;0.316;Ochlodes sylvanus;0.996318754838625;  
MW503519;Lepidoptera;Plebejus argus;NA;0.007;Plebejus argus;0.971082718833876;  
MW503523;Lepidoptera;Erebia medusa;NA;0.04;Erebia medusa;0.984042649596477;  
MW503524;Lepidoptera;Nymphalis io;NA;0.491;Aglais io;0.930153237246992;

MW503527;Lepidoptera;Polyommatus daphnis;Polyommatus daphnis;0.001;Polyommatus daphnis;0.990849495598505;  
MW503529;Lepidoptera;Maniola jurtina;NA;0.012;Maniola jurtina;0.91755716175482;  
MW503532;Lepidoptera;Vanessa cardui;Vanessa cardui;1;Vanessa cardui;0.99999459983318;  
MW503533;Lepidoptera;Polyommatus icarus;NA;0.001;Polyommatus icarus;0.971665478142064;  
MW503535;Lepidoptera;Pyrgus alveus;NA;NA;Pyrgus alveus;0.922887984165083;  
MW503536;Lepidoptera;Cupido argiades;NA;0.499;NA;0.99999999984682;  
MW503537;Lepidoptera;Glaucopsyche alexis;NA;NA;Glaucopsyche alexis;0.969998277832517;  
MW503538;Lepidoptera;Erebia melampus;Erebia melampus;0.011;Erebia melampus;0.975499903768874;  
MW503539;Lepidoptera;Agriades glandon;NA;0.001;Agriades glandon;0.972059493118607;  
MW503540;Lepidoptera;Erebia tyndarus;NA;NA;NA;0.99999999999879;  
MW503541;Lepidoptera;Euphydryas intermedia;NA;NA;NA;0.99999999996973;  
MW503542;Lepidoptera;Erebia pluto;Erebia pluto;1;Erebia pluto;0.99999921883617;  
MW503543;Lepidoptera;Plebejus argus;NA;0.328;Plebejus argus;0.969789734199889;  
MW503544;Lepidoptera;Erebia scipio;Erebia scipio;1;Erebia scipio;0.99999996086046;  
MW503545;Lepidoptera;Aricia artaxerxes;NA;0.087;Aricia artaxerxes;0.999504861991525;  
MW503546;Lepidoptera;Satyrium ilicis;Satyrium ilicis;1;Satyrium ilicis;0.999999987901305;  
MW503548;Lepidoptera;Boloria euphrosyne;Boloria euphrosyne;1;Boloria euphrosyne;0.999998365644188;  
MW503549;Lepidoptera;Lysandra coridon;NA;NA;NA;0.997881849908053;  
MW503550;Lepidoptera;Thymelicus sylvestris;Thymelicus sylvestris;1;Thymelicus sylvestris;0.999999981568351;  
MW503552;Lepidoptera;Melitaea varia;Melitaea varia;1;Melitaea varia;0.999999512263519;  
MW503554;Lepidoptera;Satyrium acaciae;Satyrium acaciae;1;Satyrium acaciae;0.999999951077798;  
MW503555;Lepidoptera;Polyommatus icarus;NA;0.001;Polyommatus icarus;0.974455446201716;  
MW503557;Lepidoptera;Satyrium spini;Satyrium spini;1;Satyrium spini;0.999999496031491;  
MW503559;Lepidoptera;Minois dryas;NA;0.025;Minois dryas;0.850746026247397;  
MW503561;Lepidoptera;Favonius quercus;NA;0.067;Favonius quercus;0.917132132986389;  
MW503562;Lepidoptera;Erebia pronoe;Erebia pronoe;0.983;Erebia pronoe;0.999660094002622;  
MW503564;Lepidoptera;Ochlodes sylvanus;NA;0.316;Ochlodes sylvanus;0.996318754838625;  
MW503566;Lepidoptera;Coenonympha glycerion;NA;0.295;Coenonympha glycerion;0.999998958157621;  
MW503567;Lepidoptera;Plebejus idas;NA;0.007;NA;0.999546324331549;  
MW503569;Lepidoptera;Agriades optilete;Agriades optilete;1;Agriades optilete;0.999999951115002;  
MW503570;Lepidoptera;Erebia styx;NA;NA;Erebia styx;0.890739244956497;  
MW503572;Lepidoptera;Erebia nivalis;NA;0.004;NA;0.99999999999958;  
MW503573;Lepidoptera;Polyommatus daphnis;NA;0.061;Polyommatus daphnis;0.995449878006027;  
MW503574;Lepidoptera;Callophrys rubi;NA;0.002;Callophrys rubi;0.998841790162773;  
MW503575;Lepidoptera;Pyrgus armoricanus;Pyrgus armoricanus;1;Pyrgus armoricanus;0.997478680096412;  
MW503576;Lepidoptera;Plebejus idas;NA;0.001;NA;0.999576342281047;  
MW503579;Lepidoptera;Erebia pronoe;Erebia pronoe;1;Erebia pronoe;0.999639549642344;  
MW503582;Lepidoptera;Euphydryas maturna;NA;NA;NA;0.999999999996973;  
MW503583;Lepidoptera;Nymphalis egea;Polygonia egea;1;Polygonia egea;0.999999911812641;  
MW503588;Lepidoptera;Thymelicus sylvestris;NA;0.131;Thymelicus sylvestris;0.999961574491035;  
MW503589;Lepidoptera;Boloria napaea;NA;0.001;Boloria napaea;0.837255834727841;  
MW503594;Lepidoptera;Fabriciana adippe;NA;NA;Fabriciana adippe;0.900255826442102;  
MW503595;Lepidoptera;Gegenes pumilio;NA;0.051;Gegenes pumilio;0.999825034556942;  
MW503597;Lepidoptera;Coenonympha arcania;NA;0.058;Coenonympha arcania;0.985866754948689;  
MW503598;Lepidoptera;Coenonympha glycerion;NA;0.353;Coenonympha glycerion;0.999997924695713;  
MW503602;Lepidoptera;Helleia helle;Lycaena helle;1;Lycaena helle;0.999999984510879;  
MW503604;Lepidoptera;Agriades glandon;NA;0.002;Agriades glandon;0.987189585708506;  
MW503605;Lepidoptera;Aphantopus hyperantus;Aphantopus hyperantus;0.003;Aphantopus hyperantus;0.999999455871523;  
MW503607;Lepidoptera;Apatura iris;Apatura iris;1;Apatura iris;0.999999999999972;  
MW503608;Lepidoptera;Melitaea diamina;NA;0.13;Melitaea diamina;0.99999982010166;  
MW503610;Lepidoptera;Hipparchia hermione;NA;NA;NA;0.999999999999991;  
MW503612;Lepidoptera;Pyrgus armoricanus;Pyrgus armoricanus;1;Pyrgus armoricanus;0.997478680096412;  
MW503613;Lepidoptera;Plebejus idas;NA;0.007;NA;0.999546324331549;  
MW503614;Lepidoptera;Erebia neoridas;NA;NA;Erebia neoridas;0.996799808345408;  
MW503616;Lepidoptera;Erebia melampus;Erebia melampus;NA;Erebia melampus;0.950990028966024;  
MW503617;Lepidoptera;Maniola jurtina;NA;0.078;NA;0.999999999998972;  
MW503619;Lepidoptera;Pyrgus foulquieri;NA;0.001;NA;0.999999999985431;  
MW503621;Lepidoptera;Pyrgus alveus;NA;NA;Pyrgus alveus;0.902591602214502;  
MW503624;Lepidoptera;Callophrys rubi;NA;0.005;Callophrys rubi;0.996200349224787;  
MW503625;Lepidoptera;Erebia ottomana;Erebia ottomana;1;Erebia ottomana;0.999999994283371;  
MW503628;Lepidoptera;Euphydryas cynthia;Euphydryas cynthia;1;Euphydryas cynthia;0.999999243242402;  
MW503630;Lepidoptera;Gegenes pumilio;Gegenes pumilio;1;Gegenes pumilio;0.999986726679266;  
MW503633;Lepidoptera;Carcharodus alceae;NA;0.915;Carcharodus alceae;0.999999992000284;  
MW503634;Lepidoptera;Plebejus argus;NA;NA;Plebejus argus;0.966850199068027;  
MW503635;Lepidoptera;Minois dryas;NA;0.025;Minois dryas;0.850746026247397;  
MW503636;Lepidoptera;Satyrium pruni;NA;0.076;Satyrium pruni;0.990322364021655;  
MW503645;Lepidoptera;Erebia epiphron;NA;NA;Erebia epiphron;0.994401488812176;  
MW503646;Lepidoptera;Euphydryas cynthia;Euphydryas cynthia;1;Euphydryas cynthia;0.99999999705039;  
MW503647;Lepidoptera;Polyommatus icarus;NA;0.003;Polyommatus icarus;0.998348220031726;

MW503653;Lepidoptera;Hipparchia statilinus;Hipparchia statilinus;1;Hipparchia statilinus;0.99999999999946;  
MW503654;Lepidoptera;Carcharodus alceae;Carcharodus alceae;0.999;Carcharodus alceae;0.999999998008462;  
MW503655;Lepidoptera;Polyommatus dorylas;Polyommatus dorylas;0.008;Polyommatus dorylas;0.991281865899703;  
MW503658;Lepidoptera;Colias palaeno;NA;0.002;NA;0.999999999983681;  
MW503659;Lepidoptera;Coenonympha pamphilus;Coenonympha pamphilus;1;Coenonympha pamphilus;0.99999999999886;  
MW503662;Lepidoptera;Boloria graeca;Boloria graeca;1;Boloria graeca;0.999999974197039;  
MW503667;Lepidoptera;Coenonympha pamphilus;Coenonympha pamphilus;1;Coenonympha pamphilus;0.99999999999744;  
MW503670;Lepidoptera;Araschnia levana;Araschnia levana;1;Araschnia levana;0.999999847283857;  
MW503671;Lepidoptera;Oeneis glacialis;NA;NA;Oeneis glacialis;0.889658213333665;  
MW503673;Lepidoptera;Euphydryas maturna;NA;0.043;Euphydryas maturna;0.800951977353662;  
MW503676;Lepidoptera;Erebia montana;Erebia montana;0.999;Erebia montana;0.997589557700034;  
MW503680;Lepidoptera;Callophrys rubi;NA;0.001;Callophrys rubi;0.998073431610611;  
MW503683;Lepidoptera;Satyrium spini;Satyrium spini;1;Satyrium spini;0.999999214132881;  
MW503688;Lepidoptera;Thecla betulae;Thecla betulae;1;Thecla betulae;0.99999999972886;  
MW503689;Lepidoptera;Colias palaeno;NA;0.001;NA;0.999999999982869;  
MW503690;Lepidoptera;Arethusana arethusa;NA;0.153;Arethusana arethusa;0.999652039046744;  
MW503691;Lepidoptera;Thymelicus lineola;Thymelicus lineola;1;Thymelicus lineola;0.999995927238524;  
MW503692;Lepidoptera;Erebia manto;NA;NA;Erebia manto;0.997710809402878;  
MW503694;Lepidoptera;Brintesia circe;Brintesia circe;1;Brintesia circe;0.999999492259648;  
MW653332;Lepidoptera;Chazara briseis;NA;NA;Chazara briseis;0.975918942027897;  
MW653333;Lepidoptera;Chazara briseis;NA;0.001;Chazara briseis;0.984129047390917;  
MW653334;Lepidoptera;Chazara briseis;NA;NA;Chazara briseis;0.975918942027897;  
MW653335;Lepidoptera;Chazara briseis;NA;NA;Chazara briseis;0.975918942027897;  
MW653336;Lepidoptera;Chazara briseis;NA;0.001;Chazara briseis;0.999914531388589;  
MW653337;Lepidoptera;Chazara briseis;NA;0.002;NA;0.9999999999976;  
MW653338;Lepidoptera;Chazara briseis;NA;0.015;Chazara briseis;0.973780660277169;  
MW653339;Lepidoptera;Chazara briseis;NA;0.003;Chazara briseis;0.987907240349495;  
MW653340;Lepidoptera;Chazara briseis;NA;0.002;Chazara briseis;0.999871537703143;  
MW653341;Lepidoptera;Chazara briseis;Chazara briseis;0.005;Chazara briseis;0.99985253102047;  
MW653342;Lepidoptera;Chazara briseis;Chazara briseis;0.986;Chazara briseis;0.999906031134837;  
MW653343;Lepidoptera;Chazara briseis;Chazara briseis;0.001;Chazara briseis;0.999945601666107;  
MW653344;Lepidoptera;Chazara briseis;Chazara briseis;0.999;Chazara briseis;0.999946813707886;  
MW653345;Lepidoptera;Chazara briseis;Chazara briseis;0.982;Chazara briseis;0.99996940359438;  
MW653346;Lepidoptera;Chazara briseis;Chazara briseis;1;Chazara briseis;0.999963035544057;  
MW653347;Lepidoptera;Chazara briseis;Chazara briseis;1;Chazara briseis;0.999978184857532;  
MW653348;Lepidoptera;Chazara briseis;Chazara briseis;0.001;Chazara briseis;0.9998860798751;  
MW653349;Lepidoptera;Chazara briseis;Chazara briseis;1;Chazara briseis;0.999943467920945;  
MW653350;Lepidoptera;Chazara briseis;NA;0.014;Chazara briseis;0.999464046561482;  
MW653351;Lepidoptera;Chazara briseis;NA;0.015;Chazara briseis;0.973780660277169;  
MW653352;Lepidoptera;Chazara briseis;NA;0.005;Chazara briseis;0.935424473238471;  
MW653353;Lepidoptera;Chazara briseis;NA;0.021;Chazara briseis;0.92273556741744;  
MW653357;Lepidoptera;Chazara briseis;Chazara briseis;0.997;Chazara briseis;0.999925393202063;  
MW653358;Lepidoptera;Chazara briseis;Chazara briseis;0.997;Chazara briseis;0.999932667934832;  
MW653359;Lepidoptera;Chazara briseis;Chazara briseis;0.997;Chazara briseis;0.999932667934832;  
MW653360;Lepidoptera;Chazara briseis;Chazara briseis;0.001;Chazara briseis;0.99992765568316;  
MW653361;Lepidoptera;Chazara briseis;Chazara briseis;1;Chazara briseis;0.999956252056971;  
MW653362;Lepidoptera;Chazara briseis;Chazara briseis;1;Chazara briseis;0.999956252056971;  
MW653363;Lepidoptera;Chazara briseis;NA;0.016;Chazara briseis;0.993606778022374;  
MW653364;Lepidoptera;Chazara briseis;Chazara briseis;0.999;Chazara briseis;0.999900100310719;  
MW653365;Lepidoptera;Chazara briseis;Chazara briseis;1;Chazara briseis;0.999956252056971;  
MW653366;Lepidoptera;Chazara briseis;Chazara briseis;1;Chazara briseis;0.999978184857532;  
MW653367;Lepidoptera;Chazara briseis;Chazara briseis;1;Chazara briseis;0.999980750463089;  
MW653368;Lepidoptera;Chazara briseis;Chazara briseis;1;Chazara briseis;0.999966710597329;  
MW653369;Lepidoptera;Chazara briseis;Chazara briseis;1;Chazara briseis;0.999978184857532;  
MW653370;Lepidoptera;Chazara briseis;Chazara briseis;1;Chazara briseis;0.999978343845403;  
MW653371;Lepidoptera;Chazara briseis;Chazara briseis;0.002;Chazara briseis;0.999913333876473;  
MW653375;Lepidoptera;Chazara briseis;Chazara briseis;0.001;Chazara briseis;0.999950804734213;  
MW653376;Lepidoptera;Chazara briseis;Chazara briseis;0.977;Chazara briseis;0.999945216100085;  
MW653377;Lepidoptera;Chazara briseis;NA;0.003;Chazara briseis;0.996070730869157;  
MW653379;Lepidoptera;Chazara briseis;NA;0.001;Chazara briseis;0.997502151075225;  
MW653380;Lepidoptera;Chazara briseis;NA;0.016;Chazara briseis;0.993606778022374;  
MW653381;Lepidoptera;Chazara briseis;Chazara briseis;0.001;Chazara briseis;0.999937777278288;  
MW653382;Lepidoptera;Chazara briseis;Chazara briseis;0.001;Chazara briseis;0.999950925257598;  
MW653383;Lepidoptera;Chazara briseis;Chazara briseis;1;Chazara briseis;0.999950663846357;  
MW653865;Lepidoptera;Polyommatus damon;Polyommatus damon;1;Polyommatus damon;0.999999464283151;  
MW653866;Lepidoptera;Polyommatus damon;Polyommatus damon;1;Polyommatus damon;0.999999907183256;  
MW653867;Lepidoptera;Polyommatus damon;Polyommatus damon;1;Polyommatus damon;0.999999865998556;  
MW653868;Lepidoptera;Polyommatus damon;Polyommatus damon;1;Polyommatus damon;0.999999907183256;  
MW653869;Lepidoptera;Polyommatus damon;Polyommatus damon;1;Polyommatus damon;0.99999993758104;  
MW653870;Lepidoptera;Polyommatus damon;Polyommatus damon;0.001;Polyommatus damon;0.999885909977385;  
MW653871;Lepidoptera;Polyommatus damon;Polyommatus damon;1;Polyommatus damon;0.99999980153398;

MW653872;Lepidoptera;Polyommatus damon;Polyommatus damon;1;Polyommatus damon;0.999999786141979;  
 MW653873;Lepidoptera;Polyommatus damon;Polyommatus damon;1;Polyommatus damon;0.999999916279595;  
 MW653874;Lepidoptera;Polyommatus damon;Polyommatus damon;1;Polyommatus damon;0.999999934302368;  
 MW653875;Lepidoptera;Polyommatus damon;Polyommatus damon;1;Polyommatus damon;0.999997689947801;  
 MW653876;Lepidoptera;Polyommatus damon;Polyommatus damon;1;Polyommatus damon;0.999995851454962;  
 MW653877;Lepidoptera;Polyommatus damon;Polyommatus damon;1;Polyommatus damon;0.999999704094664;  
 MW653878;Lepidoptera;Polyommatus damon;Polyommatus damon;1;Polyommatus damon;0.999999704094664;  
 MW653879;Lepidoptera;Polyommatus damon;Polyommatus damon;1;Polyommatus damon;0.999999285557748;  
 MW653880;Lepidoptera;Polyommatus damon;Polyommatus damon;1;Polyommatus damon;0.999999285557748;  
 MW653881;Lepidoptera;Polyommatus damon;Polyommatus damon;0.001;Polyommatus  
 damon;0.998304689990154;  
 MW653882;Lepidoptera;Polyommatus damon;Polyommatus damon;0.001;Polyommatus  
 damon;0.999022020658925;  
 MW653884;Lepidoptera;Polyommatus damon;Polyommatus damon;0.002;Polyommatus  
 damon;0.997771326686258;  
 MW653885;Lepidoptera;Polyommatus damon;Polyommatus damon;0.997;Polyommatus  
 damon;0.999663131739046;  
 MW653886;Lepidoptera;Polyommatus damon;Polyommatus damon;0.999;Polyommatus  
 damon;0.999993895297297;  
 MW653887;Lepidoptera;Polyommatus damon;Polyommatus damon;1;Polyommatus damon;0.999903487166576;  
 MW661286;Lepidoptera;Polyommatus dorylas;NA;0.439;NA;0.99954131177047;  
 MW661287;Lepidoptera;Polyommatus dorylas;NA;0.151;NA;0.999994994573285;  
 MW661291;Lepidoptera;Polyommatus dorylas;NA;0.011;NA;0.999993299662657;  
 MW661292;Lepidoptera;Polyommatus dorylas;NA;0.011;NA;0.999990517071595;  
 MW661293;Lepidoptera;Polyommatus dorylas;NA;0.011;Polyommatus dorylas;0.741264319109756;  
 MW661294;Lepidoptera;Polyommatus dorylas;NA;0.002;Polyommatus dorylas;0.869793705034101;  
 MW661295;Lepidoptera;Polyommatus dorylas;NA;0.001;Polyommatus dorylas;0.85653730236911;  
 MW661296;Lepidoptera;Polyommatus dorylas;NA;0.001;Polyommatus dorylas;0.907793678756481;  
 MW661297;Lepidoptera;Polyommatus dorylas;NA;0.142;Polyommatus dorylas;0.792641950199931;  
 MW661298;Lepidoptera;Polyommatus dorylas;NA;0.145;Polyommatus dorylas;0.818735006121927;  
 MW661299;Lepidoptera;Polyommatus dorylas;NA;0.204;NA;0.99999438735277;  
 MW661300;Lepidoptera;Polyommatus dorylas;NA;0.009;Polyommatus golgus;0.856216917651946;  
 MW661302;Lepidoptera;Polyommatus dorylas;NA;0.284;Polyommatus dorylas;0.974861423972692;  
 MW661303;Lepidoptera;Polyommatus dorylas;NA;0.008;Polyommatus dorylas;0.945322965566536;  
 MW661304;Lepidoptera;Polyommatus dorylas;NA;0.201;Polyommatus dorylas;0.954421054197113;  
 MW661305;Lepidoptera;Polyommatus dorylas;NA;0.002;Polyommatus dorylas;0.951620677911823;  
 MW661306;Lepidoptera;Polyommatus dorylas;NA;0.003;NA;0.999287518644123;  
 MW661307;Lepidoptera;Polyommatus dorylas;NA;0.001;Polyommatus dorylas;0.845982437875047;  
 MW661308;Lepidoptera;Polyommatus dorylas;Polyommatus dorylas;0.014;Polyommatus  
 dorylas;0.984293223787142;  
 MW661309;Lepidoptera;Polyommatus dorylas;Polyommatus dorylas;0.002;Polyommatus  
 dorylas;0.986741281470365;  
 MW661310;Lepidoptera;Polyommatus dorylas;NA;0.001;Polyommatus dorylas;0.801513700187457;  
 MW661311;Lepidoptera;Polyommatus dorylas;NA;0.001;Polyommatus dorylas;0.741281576749838;  
 MW661312;Lepidoptera;Polyommatus dorylas;NA;0.001;Polyommatus dorylas;0.940485861033657;  
 MW661313;Lepidoptera;Polyommatus dorylas;NA;0.001;Polyommatus dorylas;0.713972262366809;  
 MW661314;Lepidoptera;Polyommatus dorylas;NA;0.001;Polyommatus dorylas;0.826108779192714;  
 MW661315;Lepidoptera;Polyommatus dorylas;NA;0.01;Polyommatus dorylas;0.939416725715694;  
 MW661316;Lepidoptera;Polyommatus dorylas;NA;0.001;Polyommatus dorylas;0.942298751581159;  
 MW661317;Lepidoptera;Polyommatus dorylas;NA;0.001;Polyommatus dorylas;0.857961182383314;  
 MW661318;Lepidoptera;Polyommatus dorylas;NA;0.896;Polyommatus dorylas;0.901503256158198;  
 MW661319;Lepidoptera;Polyommatus dorylas;NA;0.002;Polyommatus dorylas;0.985013516331654;  
 MW661320;Lepidoptera;Polyommatus dorylas;NA;0.388;NA;0.999970375601446;  
 MW661321;Lepidoptera;Polyommatus dorylas;NA;0.002;NA;0.999967328292958;  
 MW661322;Lepidoptera;Polyommatus dorylas;NA;0.001;Polyommatus dorylas;0.762522067829775;  
 MW661323;Lepidoptera;Polyommatus dorylas;NA;NA;NA;0.999616845173466;  
 MW661324;Lepidoptera;Polyommatus dorylas;NA;0.762;NA;0.99993444751449;  
 MW661325;Lepidoptera;Polyommatus dorylas;NA;0.76;NA;0.999970339422813;  
 MW661326;Lepidoptera;Polyommatus dorylas;NA;0.001;NA;0.999758542497655;  
 MW767997;Lepidoptera;Hamearis lucina;Hamearis lucina;1;Hamearis lucina;0.999999999903139;  
 MW768130;Lepidoptera;Pieris napi;NA;0.066;Pieris napi;0.832895481558215;  
 MW785853;Lepidoptera;Callophrys rubi;NA;0.003;Callophrys rubi;0.997328639918919;  
 MW785854;Lepidoptera;Callophrys rubi;NA;0.004;Callophrys rubi;0.995167221527964;  
 MW785855;Lepidoptera;Callophrys rubi;NA;0.003;Callophrys rubi;0.997328639918919;  
 MW785856;Lepidoptera;Callophrys rubi;NA;0.003;Callophrys rubi;0.997328639918919;  
 MW785857;Lepidoptera;Callophrys rubi;NA;0.003;Callophrys rubi;0.997328639918919;  
 MW785862;Lepidoptera;Callophrys rubi;NA;0.003;Callophrys rubi;0.997328639918919;  
 MW785863;Lepidoptera;Callophrys rubi;NA;0.002;Callophrys rubi;0.978826205827155;  
 MW785864;Lepidoptera;Callophrys rubi;NA;0.003;Callophrys rubi;0.997328639918919;  
 MW785865;Lepidoptera;Callophrys rubi;NA;0.003;Callophrys rubi;0.997328639918919;  
 MW785866;Lepidoptera;Callophrys rubi;NA;0.003;Callophrys rubi;0.997328639918919;  
 MW785872;Lepidoptera;Callophrys rubi;NA;0.002;Callophrys rubi;0.978826205827155;  
 MW785873;Lepidoptera;Callophrys rubi;NA;0.003;Callophrys rubi;0.997328639918919;  
 MW857290;Lepidoptera;Agriades orbitulus;NA;0.031;Agriades orbitulus;0.998409903321215;  
 MW857294;Lepidoptera;Celastrina argiolus;Celastrina argiolus;1;Celastrina  
 argiolus;0.999708846309046;  
 MW857550;Lepidoptera;Colias croceus;NA;NA;NA;0.99999999999962;  
 MW861639;Lepidoptera;Aricia eumedon;Eumedonia eumedon;0.001;Eumedonia eumedon;0.997789624617489;

MW861640;Lepidoptera;Aricia eumedon;NA;0.054;Eumedonia eumedon;0.997429303960375;  
MW861641;Lepidoptera;Aricia eumedon;Eumedonia eumedon;0.001;Eumedonia eumedon;0.998426969289132;  
MW861642;Lepidoptera;Aricia eumedon;Eumedonia eumedon;0.001;Eumedonia eumedon;0.998400646011029;  
MW861643;Lepidoptera;Aricia eumedon;Eumedonia eumedon;0.031;Eumedonia eumedon;0.988312436606533;  
MW861644;Lepidoptera;Aricia eumedon;NA;0.128;NA;0.999999992682818;  
MW861645;Lepidoptera;Aricia eumedon;Eumedonia eumedon;1;Eumedonia eumedon;0.990532058725973;  
MW861646;Lepidoptera;Aricia eumedon;NA;0.128;NA;0.999999992682818;  
MW861647;Lepidoptera;Aricia eumedon;Eumedonia eumedon;1;Eumedonia eumedon;0.998602192664416;  
MW861648;Lepidoptera;Aricia eumedon;Eumedonia eumedon;0.002;Eumedonia eumedon;0.997793024117892;  
MW861649;Lepidoptera;Aricia eumedon;Eumedonia eumedon;0.002;Eumedonia eumedon;0.997434540282035;  
MW861650;Lepidoptera;Aricia eumedon;Eumedonia eumedon;0.001;Eumedonia eumedon;0.999006696643375;  
MW861651;Lepidoptera;Aricia eumedon;Eumedonia eumedon;0.001;Eumedonia eumedon;0.997362661323557;  
MW861652;Lepidoptera;Aricia eumedon;Eumedonia eumedon;0.001;Eumedonia eumedon;0.99836395629257;  
MW861653;Lepidoptera;Aricia eumedon;Eumedonia eumedon;0.004;Eumedonia eumedon;0.99844803714109;  
MW861654;Lepidoptera;Aricia eumedon;NA;0.054;Eumedonia eumedon;0.997429303960375;  
MW861655;Lepidoptera;Aricia eumedon;Eumedonia eumedon;0.004;Eumedonia eumedon;0.99811954466132;  
MW861656;Lepidoptera;Aricia eumedon;Eumedonia eumedon;0.002;Eumedonia eumedon;0.997539896627421;  
MW861658;Lepidoptera;Aricia eumedon;Eumedonia eumedon;0.002;Eumedonia eumedon;0.998284981990542;  
MW861659;Lepidoptera;Aricia eumedon;Eumedonia eumedon;0.001;Eumedonia eumedon;0.994835962523553;  
MW861660;Lepidoptera;Aricia eumedon;NA;0.242;NA;0.999999986159724;  
MW861661;Lepidoptera;Aricia eumedon;NA;0.14;NA;0.999999988612132;  
MW861662;Lepidoptera;Aricia eumedon;Eumedonia eumedon;0.02;Eumedonia eumedon;0.989916851637061;  
MW861663;Lepidoptera;Aricia eumedon;Eumedonia eumedon;0.02;Eumedonia eumedon;0.989916851637061;  
MW861664;Lepidoptera;Aricia eumedon;Eumedonia eumedon;0.02;Eumedonia eumedon;0.989916851637061;  
MW861665;Lepidoptera;Aricia eumedon;NA;0.14;NA;0.999999988612132;  
MW861666;Lepidoptera;Aricia eumedon;NA;0.14;NA;0.999999988612132;  
MW861667;Lepidoptera;Aricia eumedon;NA;0.197;NA;0.999999992955064;  
MW861668;Lepidoptera;Aricia eumedon;Eumedonia eumedon;0.004;Eumedonia eumedon;0.993727252581826;  
MW861669;Lepidoptera;Aricia eumedon;Eumedonia eumedon;0.001;Eumedonia eumedon;0.996793462294164;  
MW861670;Lepidoptera;Aricia eumedon;NA;0.14;NA;0.999999988612132;  
MW861671;Lepidoptera;Aricia eumedon;NA;0.14;NA;0.999999988612132;  
MW861672;Lepidoptera;Aricia eumedon;NA;0.156;NA;0.999999985644424;  
MW861673;Lepidoptera;Aricia eumedon;NA;0.14;NA;0.999999988612132;  
MW861674;Lepidoptera;Aricia eumedon;Eumedonia eumedon;0.012;Eumedonia eumedon;0.996977243476777;  
MW861675;Lepidoptera;Aricia eumedon;Eumedonia eumedon;0.002;Eumedonia eumedon;0.998062893323354;  
MW861676;Lepidoptera;Aricia eumedon;Eumedonia eumedon;0.015;Eumedonia eumedon;0.98991871778437;  
MW861677;Lepidoptera;Aricia eumedon;Eumedonia eumedon;1;Eumedonia eumedon;0.994829162794983;  
MW861678;Lepidoptera;Aricia eumedon;Eumedonia eumedon;0.015;Eumedonia eumedon;0.98991871778437;  
MW861679;Lepidoptera;Aricia eumedon;Eumedonia eumedon;1;Eumedonia eumedon;0.994829162794983;  
MW861680;Lepidoptera;Aricia eumedon;Eumedonia eumedon;0.012;Eumedonia eumedon;0.996727247372845;  
MW981910;Lepidoptera;Hamearis lucina;Hamearis lucina;1;Hamearis lucina;0.99999999972545;  
MW982027;Lepidoptera;Hamearis lucina;Hamearis lucina;NA;Hamearis lucina;0.999999994662573;  
MZ021520;Lepidoptera;Colias croceus;NA;0.059;NA;0.99999999999738;  
MZ026157;Lepidoptera;Fabriciana adippe;NA;0.007;Fabriciana adippe;0.924034894958;  
MZ026159;Lepidoptera;Argynnis aglaja;NA;0.005;Speyeria aglaja;0.811256610843845;  
MZ026161;Lepidoptera;Argynnis aglaja;NA;0.005;Speyeria aglaja;0.811256610843845;  
MZ026162;Lepidoptera;Argynnis aglaja;NA;0.003;Argynnis aglaja;0.733835567814737;  
MZ026163;Lepidoptera;Argynnis aglaja;NA;0.003;Argynnis aglaja;0.733835567814737;  
MZ026164;Lepidoptera;Argynnis aglaja;NA;0.002;NA;0.99999999997143;  
MZ026165;Lepidoptera;Argynnis aglaja;NA;0.007;NA;0.99999999997347;  
MZ026166;Lepidoptera;Argynnis aglaja;NA;0.007;NA;0.99999999997347;  
MZ026167;Lepidoptera;Argynnis aglaja;NA;0.007;NA;0.99999999997347;  
MZ026168;Lepidoptera;Argynnis aglaja;NA;0.007;NA;0.99999999997347;  
MZ026170;Lepidoptera;Argynnis aglaja;NA;0.007;NA;0.99999999997347;  
MZ026171;Lepidoptera;Argynnis aglaja;NA;0.007;NA;0.99999999997347;  
MZ026174;Lepidoptera;Argynnis aglaja;NA;0.003;NA;0.99999999999469;  
MZ026175;Lepidoptera;Argynnis aglaja;NA;0.003;NA;0.99999999999469;  
MZ026176;Lepidoptera;Argynnis aglaja;NA;0.004;Speyeria aglaja;0.763595701938357;  
MZ026177;Lepidoptera;Argynnis aglaja;NA;0.004;Speyeria aglaja;0.763595701938357;  
MZ026178;Lepidoptera;Argynnis aglaja;NA;0.004;Speyeria aglaja;0.763595701938357;  
MZ026179;Lepidoptera;Argynnis aglaja;NA;0.004;Speyeria aglaja;0.763595701938357;  
MZ026180;Lepidoptera;Argynnis aglaja;NA;0.004;Speyeria aglaja;0.763595701938357;  
MZ026181;Lepidoptera;Argynnis aglaja;NA;0.004;Speyeria aglaja;0.763595701938357;  
MZ026182;Lepidoptera;Argynnis aglaja;NA;0.004;Speyeria aglaja;0.763595701938357;  
MZ026183;Lepidoptera;Argynnis aglaja;NA;0.004;Speyeria aglaja;0.763595701938357;  
MZ026184;Lepidoptera;Argynnis aglaja;NA;0.004;Speyeria aglaja;0.763595701938357;  
MZ026185;Lepidoptera;Argynnis aglaja;NA;0.004;Speyeria aglaja;0.763595701938357;  
MZ026186;Lepidoptera;Argynnis aglaja;NA;0.004;Speyeria aglaja;0.763595701938357;  
MZ026187;Lepidoptera;Argynnis aglaja;NA;0.004;Speyeria aglaja;0.763595701938357;  
MZ026188;Lepidoptera;Argynnis aglaja;NA;0.004;Speyeria aglaja;0.763595701938357;  
MZ026189;Lepidoptera;Argynnis aglaja;NA;0.004;Speyeria aglaja;0.763595701938357;  
MZ026190;Lepidoptera;Argynnis aglaja;NA;0.003;Speyeria aglaja;0.769044815097004;  
MZ026191;Lepidoptera;Argynnis aglaja;NA;0.01;NA;0.99999999998391;  
MZ026194;Lepidoptera;Argynnis aglaja;NA;0.01;NA;0.99999999998391;  
MZ026195;Lepidoptera;Argynnis aglaja;NA;0.01;NA;0.99999999998391;  
MZ026196;Lepidoptera;Fabriciana niobe;Fabriciana niobe;0.002;Fabriciana niobe;0.894497904408801;  
MZ026197;Lepidoptera;Fabriciana niobe;Fabriciana niobe;0.002;Fabriciana niobe;0.894497904408801;  
MZ026198;Lepidoptera;Fabriciana niobe;Fabriciana niobe;0.002;Fabriciana niobe;0.894497904408801;



[illegible]

MZ026274;Lepidoptera;Fabriciana adippe;NA;0.007;Fabriciana adippe;0.924034894958;  
 MZ026275;Lepidoptera;Fabriciana adippe;NA;0.007;Fabriciana adippe;0.924034894958;  
 MZ026276;Lepidoptera;Fabriciana adippe;NA;0.007;Fabriciana adippe;0.924034894958;  
 MZ026277;Lepidoptera;Fabriciana adippe;NA;0.028;Fabriciana adippe;0.842479171099244;  
 MZ026278;Lepidoptera;Fabriciana adippe;NA;0.028;Fabriciana adippe;0.842479171099244;  
 MZ026279;Lepidoptera;Fabriciana adippe;NA;0.028;Fabriciana adippe;0.842479171099244;  
 MZ026280;Lepidoptera;Fabriciana adippe;NA;0.028;Fabriciana adippe;0.842479171099244;  
 MZ026281;Lepidoptera;Fabriciana adippe;NA;0.028;Fabriciana adippe;0.842479171099244;  
 MZ026282;Lepidoptera;Fabriciana adippe;NA;0.028;Fabriciana adippe;0.842479171099244;  
 MZ026283;Lepidoptera;Fabriciana adippe;NA;0.028;Fabriciana adippe;0.842479171099244;  
 MZ026284;Lepidoptera;Fabriciana adippe;NA;0.004;Fabriciana adippe;0.938062647428684;  
 MZ026285;Lepidoptera;Fabriciana adippe;NA;0.008;Fabriciana adippe;0.93231640159818;  
 MZ026286;Lepidoptera;Fabriciana adippe;NA;0.008;Fabriciana adippe;0.93231640159818;  
 MZ026287;Lepidoptera;Fabriciana adippe;NA;0.008;Fabriciana adippe;0.93231640159818;  
 MZ026288;Lepidoptera;Fabriciana adippe;NA;0.008;Fabriciana adippe;0.93231640159818;  
 MZ026289;Lepidoptera;Fabriciana adippe;NA;0.008;Fabriciana adippe;0.93231640159818;  
 MZ026290;Lepidoptera;Fabriciana adippe;NA;0.008;Fabriciana adippe;0.93231640159818;  
 MZ128126;Lepidoptera;Euphydryas maturna;NA;0.013;NA;0.99999999988838;  
 MZ128127;Lepidoptera;Euphydryas maturna;NA;0.013;NA;0.99999999988838;  
 MZ128128;Lepidoptera;Euphydryas maturna;NA;0.013;NA;0.99999999988838;  
 MZ128129;Lepidoptera;Euphydryas intermedia;Euphydryas intermedia;0.995;Euphydryas  
 intermedia;0.812587411154132;  
 MZ128130;Lepidoptera;Euphydryas intermedia;Euphydryas intermedia;0.995;Euphydryas  
 intermedia;0.812587411154132;  
 MZ128131;Lepidoptera;Euphydryas intermedia;Euphydryas iduna;NA;Euphydryas  
 iduna;0.816738704456442;  
 MZ128132;Lepidoptera;Euphydryas intermedia;Euphydryas iduna;NA;Euphydryas  
 iduna;0.816738704456442;  
 MZ128133;Lepidoptera;Euphydryas maturna;NA;0.126;Euphydryas maturna;0.885705216462044;  
 MZ128134;Lepidoptera;Euphydryas maturna;NA;0.126;Euphydryas maturna;0.885705216462044;  
 MZ128135;Lepidoptera;Euphydryas intermedia;Euphydryas intermedia;0.995;Euphydryas  
 intermedia;0.812587411154132;  
 NLLEA1420-14;Lepidoptera;Aglais urticae;NA;0.002;Aglais urticae;0.987497593219019;  
 NLLEA1421-14;Lepidoptera;Aglais urticae;NA;0.002;Aglais urticae;0.987497593219019;  
 NLLEA1422-14;Lepidoptera;Polygonia c-album;NA;0.215;NA;0.999999192918557;  
 NLLEA1423-14;Lepidoptera;Celastrina argiolus;Celastrina argiolus;1;Celastrina  
 argiolus;0.999527385150531;  
 NLLEA1424-14;Lepidoptera;Maniola jurtina;NA;0.001;Maniola jurtina;0.939220105860875;  
 NLLEA1425-14;Lepidoptera;Maniola jurtina;Maniola jurtina;NA;0.99999999780776;  
 NLLEA1426-14;Lepidoptera;Aphantopus hyperantus;Aphantopus hyperantus;0.006;Aphantopus  
 hyperantus;0.999998615504572;  
 NLLEA1427-14;Lepidoptera;Ochlodes sylvanus;NA;0.116;Ochlodes sylvanus;0.996981894160124;  
 NLLEA1428-14;Lepidoptera;Thymelicus lineola;Thymelicus lineola;1;Thymelicus  
 lineola;0.999983863940786;  
 NLLEA1429-14;Lepidoptera;Araschnia levana;Araschnia levana;1;Araschnia levana;0.999999772187832;  
 NLLEA1431-14;Lepidoptera;Callophrys rubi;NA;0.001;Callophrys rubi;0.99870518510598;  
 NLLEA1432-14;Lepidoptera;Anthocharis cardamines;Anthocharis cardamines;1;Anthocharis  
 cardamines;0.999999940675226;  
 NLLEA1433-14;Lepidoptera;Celastrina argiolus;Celastrina argiolus;1;Celastrina  
 argiolus;0.999527385150531;  
 NLLEA1434-14;Lepidoptera;Anthocharis cardamines;Anthocharis cardamines;1;Anthocharis  
 cardamines;0.999999940675226;  
 NLLEA1435-14;Lepidoptera;Gonepteryx rhamni;NA;0.474;Gonepteryx rhamni;0.982076396127858;  
 NLLEA1436-14;Lepidoptera;Callophrys rubi;NA;0.002;Callophrys rubi;0.998841790162773;  
 NLLEA1437-14;Lepidoptera;Araschnia levana;Araschnia levana;1;Araschnia levana;0.999999772187832;  
 NLLEA1438-14;Lepidoptera;Pararge aegeria;Pararge aegeria;1;Pararge aegeria;0.99999999963165;  
 NLLEA1439-14;Lepidoptera;Pararge aegeria;Pararge aegeria;1;Pararge aegeria;0.99999999963165;  
 NLLEA1440-14;Lepidoptera;Coenonympha pamphilus;Coenonympha pamphilus;1;Coenonympha  
 pamphilus;0.99999999999744;  
 NLLEA1441-14;Lepidoptera;Pieris napi;NA;NA;Pieris napi;0.860244891707633;  
 NLLEA1442-14;Lepidoptera;Celastrina argiolus;Celastrina argiolus;1;Celastrina  
 argiolus;0.999527385150531;  
 NLLEA1443-14;Lepidoptera;Aphantopus hyperantus;Aphantopus hyperantus;0.004;Aphantopus  
 hyperantus;0.999598909345147;  
 NLLEA1444-14;Lepidoptera;Pyronia tithonus;Pyronia tithonus;NA;Pyronia tithonus;1;  
 NLLEA1445-14;Lepidoptera;Pyronia tithonus;Pyronia tithonus;1;Pyronia tithonus;1;  
 NLLEA1446-14;Lepidoptera;Aglais urticae;NA;0.002;Aglais urticae;0.987497593219019;  
 NLLEA1449-14;Lepidoptera;Lasiommata megera;Lasiommata megera;1;Lasiommata  
 megera;0.999928528239676;  
 NLLEA1450-14;Lepidoptera;Gonepteryx rhamni;NA;0.474;Gonepteryx rhamni;0.982076396127858;  
 NLLEA1451-14;Lepidoptera;Anthocharis cardamines;Anthocharis cardamines;1;Anthocharis  
 cardamines;0.999999940675226;  
 NLLEA1452-14;Lepidoptera;Anthocharis cardamines;Anthocharis cardamines;1;Anthocharis  
 cardamines;0.999999940675226;  
 NLLEA1453-14;Lepidoptera;Pieris napi;NA;0.011;Pieris napi;0.801985394724814;  
 NLLEA1454-14;Lepidoptera;Gonepteryx rhamni;NA;0.474;Gonepteryx rhamni;0.982076396127858;  
 NLLEA1455-14;Lepidoptera;Lycaena phlaeas;Lycaena phlaeas;1;Lycaena phlaeas;0.999999996363186;  
 NLLEA1456-14;Lepidoptera;Pararge aegeria;Pararge aegeria;1;Pararge aegeria;0.99999999963165;

NLLEA1457-14;Lepidoptera;Pieris napi;NA;0.011;Pieris napi;0.801985394724814;  
NLLEA1458-14;Lepidoptera;Anthocharis cardamines;Anthocharis cardamines;1;Anthocharis  
cardamines;0.999999940675226;  
NLLEA1459-14;Lepidoptera;Pararge aegeria;Pararge aegeria;1;Pararge aegeria;0.999999999963165;  
NLLEA1460-14;Lepidoptera;Plebejus argus;NA;0.036;Plebejus argus;0.988160277018267;  
NLLEA1461-14;Lepidoptera;Coenonympha pamphilus;Coenonympha pamphilus;1;Coenonympha  
pamphilus;0.999999999999744;  
NLLEA1462-14;Lepidoptera;Celastrina argiolus;Celastrina argiolus;1;Celastrina  
argiolus;0.999708846309046;  
NLLEA1463-14;Lepidoptera;Thymelicus lineola;Thymelicus lineola;1;Thymelicus  
lineola;0.999984446255238;  
NLLEA1465-14;Lepidoptera;Maniola jurtina;NA;0.001;Maniola jurtina;0.939220105860875;  
NLLEA1466-14;Lepidoptera;Lycaena phlaeas;Lycaena phlaeas;1;Lycaena phlaeas;0.99999996363186;  
NLLEA1467-14;Lepidoptera;Pieris napi;NA;0.011;Pieris napi;0.801985394724814;  
NLLEA1469-14;Lepidoptera;Pararge aegeria;Pararge aegeria;1;Pararge aegeria;0.999999999963165;  
NLLEA1470-14;Lepidoptera;Maniola jurtina;NA;0.001;Maniola jurtina;0.762537481133735;  
NLLEA1471-14;Lepidoptera;Celastrina argiolus;Celastrina argiolus;1;Celastrina  
argiolus;0.999527385150531;  
NLLEA1472-14;Lepidoptera;Gonepteryx rhamni;NA;0.474;Gonepteryx rhamni;0.982076396127858;  
NLLEA1473-14;Lepidoptera;Araschnia levana;Araschnia levana;1;Araschnia levana;0.99999972187832;  
NLLEA1474-14;Lepidoptera;Ochlodes sylvanus;NA;0.316;Ochlodes sylvanus;0.996318754838625;  
NLLEA1475-14;Lepidoptera;Pyronia tithonus;Pyronia tithonus;1;Pyronia tithonus;1;  
NLLEA1476-14;Lepidoptera;Hipparchia semele;NA;NA;Hipparchia semele;0.787027881967247;  
NLLEA1478-14;Lepidoptera;Issoria lathonia;Issoria lathonia;1;Issoria lathonia;0.99999999993975;  
NLLEA1479-14;Lepidoptera;Coenonympha pamphilus;Coenonympha pamphilus;1;Coenonympha  
pamphilus;0.99999999645354;  
NLLEA1480-14;Lepidoptera;Polyommatus icarus;NA;0.003;Polyommatus icarus;0.986125651677522;  
NLLEA1481-14;Lepidoptera;Polygonia c-album;NA;0.215;NA;0.999999192918557;  
NLLEA1483-14;Lepidoptera;Lycaena phlaeas;Lycaena phlaeas;1;Lycaena phlaeas;0.99999996363186;  
NLLEA1484-14;Lepidoptera;Issoria lathonia;Issoria lathonia;1;Issoria lathonia;0.9999999989257;  
NLLEA1485-14;Lepidoptera;Aphantopus hyperantus;Aphantopus hyperantus;0.003;Aphantopus  
hyperantus;0.999999455871523;  
NLLEA1486-14;Lepidoptera;Aphantopus hyperantus;Aphantopus hyperantus;0.004;Aphantopus  
hyperantus;0.999119734994286;  
NLLEA1487-14;Lepidoptera;Plebejus argus;NA;0.036;Plebejus argus;0.988160277018267;  
NLLEA1488-14;Lepidoptera;Aglais urticae;Aglais urticae;0.001;Aglais urticae;0.990690600684087;  
NLLEA1489-14;Lepidoptera;Aglais urticae;NA;0.002;Aglais urticae;0.987497593219019;  
NLLEA1491-14;Lepidoptera;Vanessa atalanta;Vanessa atalanta;1;Vanessa atalanta;0.99999999757762;  
NLLEA1494-14;Lepidoptera;Coenonympha pamphilus;Coenonympha pamphilus;1;Coenonympha  
pamphilus;0.999999999999744;  
NLLEA1495-14;Lepidoptera;Favonius quercus;NA;NA;Favonius quercus;0.73046069582187;  
NLLEA1498-14;Lepidoptera;Hipparchia semele;NA;0.001;Hipparchia semele;0.802446092830354;  
NLLEA1499-14;Lepidoptera;Vanessa atalanta;Vanessa atalanta;1;Vanessa atalanta;0.99999999757762;  
NLLEA1500-14;Lepidoptera;Polyommatus icarus;NA;0.001;Polyommatus icarus;0.981285528541973;  
NLLEA1501-14;Lepidoptera;Melitaea cinxia;Melitaea cinxia;1;Melitaea cinxia;0.99999999999829;  
NLLEA1502-14;Lepidoptera;Vanessa atalanta;Vanessa atalanta;1;Vanessa atalanta;0.99999999757762;  
NLLEA1503-14;Lepidoptera;Polyommatus icarus;NA;0.001;Polyommatus icarus;0.981285528541973;  
NLLEA1504-14;Lepidoptera;Aricia agestis;NA;0.253;Aricia agestis;0.996350017387504;  
NLLEA1505-14;Lepidoptera;Aricia agestis;NA;0.118;Aricia agestis;0.999400087822904;  
NLLEA1506-14;Lepidoptera;Maniola jurtina;NA;0.012;Maniola jurtina;0.91755716175482;  
NLLEA1508-14;Lepidoptera;Polygonia c-album;NA;0.215;NA;0.999999192918557;  
NLON1109-22;Lepidoptera;Pyrgus alveus;NA;NA;Pyrgus alveus;0.906675168890243;  
NLON1112-22;Lepidoptera;Pyrgus andromedae;Pyrgus andromedae;0.001;Pyrgus  
andromedae;0.999775458060829;  
NLON1113-22;Lepidoptera;Pyrgus andromedae;Pyrgus andromedae;NA;Pyrgus  
andromedae;0.99658054305005;  
NLON1114-22;Lepidoptera;Pyrgus andromedae;Pyrgus andromedae;NA;Pyrgus  
andromedae;0.99658054305005;  
NLON690-19;Lepidoptera;Thymelicus lineola;Thymelicus lineola;1;Thymelicus  
lineola;0.999957886991374;  
OK345538;Lepidoptera;Thymelicus sylvestris;Thymelicus sylvestris;1;Thymelicus  
sylvestris;0.999999985935205;  
OK345540;Lepidoptera;Pyrgus armoricanus;Pyrgus armoricanus;1;Pyrgus  
armoricanus;0.999997353848817;  
OK345542;Lepidoptera;Carcharodus alceae;Carcharodus alceae;0.999;Carcharodus  
alceae;0.99999998008462;  
OK345544;Lepidoptera;Pyrgus malvoides;NA;0.002;Pyrgus malvae;0.953044422614743;  
OK345546;Lepidoptera;Carcharodus alceae;Carcharodus alceae;0.003;Carcharodus  
alceae;0.99999998739763;  
OK345547;Lepidoptera;Gegenes pumilio;Gegenes pumilio;1;Gegenes pumilio;0.999986726679266;  
OK345551;Lepidoptera;Thymelicus lineola;Thymelicus lineola;1;Thymelicus  
lineola;0.999999612861974;  
OK345552;Lepidoptera;Pyrgus carthami;Pyrgus carthami;1;Pyrgus carthami;0.999999564518769;  
OK345553;Lepidoptera;Pyrgus malvoides;NA;0.044;Pyrgus malvoides;0.854446129597206;  
OK345554;Lepidoptera;Thymelicus sylvestris;NA;0.324;Thymelicus sylvestris;0.999940778442454;  
OK345555;Lepidoptera;Pyrgus cacaliae;Pyrgus cacaliae;0.001;Pyrgus cacaliae;0.997160148319376;  
OK345558;Lepidoptera;Thymelicus sylvestris;Thymelicus sylvestris;1;Thymelicus  
sylvestris;0.999999985935205;

OK345562;Lepidoptera;Erynnis tages;Erynnis tages;1;Erynnis tages;0.999997852943696;  
OK345563;Lepidoptera;Carcharodus alceae;Carcharodus alceae;1;Carcharodus  
alceae;0.99999990863188;  
OK345564;Lepidoptera;Thymelicus acteon;Thymelicus acteon;1;Thymelicus acteon;0.99999994891141;  
OK345565;Lepidoptera;Thymelicus acteon;Thymelicus acteon;1;Thymelicus acteon;0.999999931749871;  
OK345567;Lepidoptera;Pyrgus armoricanus;Pyrgus armoricanus;1;Pyrgus  
armoricanus;0.99997478770661;  
OK345568;Lepidoptera;Pyrgus cacaliae;Pyrgus cacaliae;0.998;Pyrgus cacaliae;0.997151395866208;  
OK345571;Lepidoptera;Carcharodus baeticus;Carcharodus baeticus;1;Carcharodus  
baeticus;0.999987455498865;  
OK345574;Lepidoptera;Ochlodes sylvanus;NA;0.316;Ochlodes sylvanus;0.996318754838625;  
OK345581;Lepidoptera;Thymelicus acteon;Thymelicus acteon;1;Thymelicus acteon;0.9999999752248;  
OK345584;Lepidoptera;Pyrgus malvoides;NA;0.013;Pyrgus malvoides;0.718136381798304;  
OK345587;Lepidoptera;Pyrgus armoricanus;Pyrgus armoricanus;1;Pyrgus  
armoricanus;0.99997353848817;  
OK345589;Lepidoptera;Pyrgus cacaliae;Pyrgus cacaliae;0.001;Pyrgus cacaliae;0.997160148319376;  
OK345591;Lepidoptera;Pyrgus malvoides;Pyrgus malvoides;0.034;Pyrgus malvoides;0.866873678479063;  
OK345592;Lepidoptera;Carcharodus alceae;Carcharodus alceae;0.999;Carcharodus  
alceae;0.99999996339511;  
OK345594;Lepidoptera;Pyrgus malvoides;NA;0.028;Pyrgus malvoides;0.773800988526221;  
OK345595;Lepidoptera;Thymelicus sylvestris;Thymelicus sylvestris;1;Thymelicus  
sylvestris;0.99999989506279;  
OK345596;Lepidoptera;Pyrgus malvoides;NA;0.076;Pyrgus malvoides;0.887854315566122;  
OK345597;Lepidoptera;Pyrgus malvoides;NA;0.083;Pyrgus malvoides;0.888826882787227;  
OK345601;Lepidoptera;Pyrgus cacaliae;Pyrgus cacaliae;0.001;Pyrgus cacaliae;0.997160148319376;  
OK345603;Lepidoptera;Carcharodus alceae;Carcharodus alceae;NA;Carcharodus  
alceae;0.99999950923212;  
OK345604;Lepidoptera;Thymelicus acteon;Thymelicus acteon;1;Thymelicus acteon;0.999999931749871;  
OK345608;Lepidoptera;Thymelicus acteon;Thymelicus acteon;1;Thymelicus acteon;0.999999931749871;  
OK345609;Lepidoptera;Thymelicus sylvestris;Thymelicus sylvestris;1;Thymelicus  
sylvestris;0.99999985935205;  
OK345611;Lepidoptera;Pyrgus cacaliae;Pyrgus cacaliae;0.001;Pyrgus cacaliae;0.997160148319376;  
OK345612;Lepidoptera;Pyrgus onopordi;Pyrgus onopordi;1;Pyrgus onopordi;0.99997551418075;  
OK345613;Lepidoptera;Pyrgus malvoides;NA;0.059;Pyrgus malvoides;0.886543025846984;  
OK345615;Lepidoptera;Pyrgus armoricanus;Pyrgus armoricanus;1;Pyrgus  
armoricanus;0.99997353848817;  
OK345617;Lepidoptera;Pyrgus cacaliae;Pyrgus cacaliae;0.001;Pyrgus cacaliae;0.997160148319376;  
OK345622;Lepidoptera;Ochlodes sylvanus;NA;0.316;Ochlodes sylvanus;0.996318754838625;  
OK345625;Lepidoptera;Carcharodus baeticus;Carcharodus baeticus;1;Carcharodus  
baeticus;0.999983899664537;  
OK345629;Lepidoptera;Pyrgus malvoides;NA;0.076;Pyrgus malvoides;0.887854315566122;  
OK345636;Lepidoptera;Erynnis tages;Erynnis tages;1;Erynnis tages;0.9999917982782;  
OK345637;Lepidoptera;Thymelicus lineola;Thymelicus lineola;1;Thymelicus  
lineola;0.999971535093703;  
OK345638;Lepidoptera;Ochlodes sylvanus;NA;0.316;Ochlodes sylvanus;0.996318754838625;  
OK345639;Lepidoptera;Pyrgus cacaliae;Pyrgus cacaliae;0.001;Pyrgus cacaliae;0.997160148319376;  
OK345640;Lepidoptera;Pyrgus malvoides;Pyrgus malvoides;0.023;Pyrgus malvoides;0.933543811475575;  
OK345641;Lepidoptera;Ochlodes sylvanus;NA;0.316;Ochlodes sylvanus;0.996318754838625;  
OK345642;Lepidoptera;Thymelicus acteon;Thymelicus acteon;1;Thymelicus acteon;0.9999999752248;  
OK345644;Lepidoptera;Thymelicus acteon;Thymelicus acteon;1;Thymelicus acteon;0.999999931749871;  
OK345648;Lepidoptera;Ochlodes sylvanus;NA;0.316;Ochlodes sylvanus;0.996318754838625;  
OK345649;Lepidoptera;Gegenes pumilio;Gegenes pumilio;1;Gegenes pumilio;0.999986726679266;  
OK345650;Lepidoptera;Thymelicus sylvestris;Thymelicus sylvestris;1;Thymelicus  
sylvestris;0.99999985935205;  
OK345652;Lepidoptera;Carcharodus baeticus;Carcharodus baeticus;1;Carcharodus  
baeticus;0.999983899664537;  
OK345654;Lepidoptera;Pyrgus cacaliae;Pyrgus cacaliae;0.001;Pyrgus cacaliae;0.997160148319376;  
OK345655;Lepidoptera;Erynnis tages;Erynnis tages;1;Erynnis tages;0.99999281987018;  
OK345657;Lepidoptera;Carcharodus alceae;Carcharodus alceae;1;Carcharodus  
alceae;0.99999997933088;  
OK345658;Lepidoptera;Carcharodus baeticus;Carcharodus baeticus;1;Carcharodus  
baeticus;0.999986689255875;  
OK345659;Lepidoptera;Erynnis tages;Erynnis tages;1;Erynnis tages;0.99999281987018;  
OK345661;Lepidoptera;Carcharodus baeticus;Carcharodus baeticus;1;Carcharodus  
baeticus;0.99998502227564;  
OK345666;Lepidoptera;Gegenes pumilio;Gegenes pumilio;1;Gegenes pumilio;0.999986726679266;  
OK345668;Lepidoptera;Ochlodes sylvanus;NA;0.316;Ochlodes sylvanus;0.996318754838625;  
OK345669;Lepidoptera;Pyrgus malvoides;NA;0.016;Pyrgus malvoides;0.825355295979306;  
OK345671;Lepidoptera;Thymelicus acteon;Thymelicus acteon;1;Thymelicus acteon;0.99999994723538;  
OK345673;Lepidoptera;Thymelicus sylvestris;Thymelicus sylvestris;1;Thymelicus  
sylvestris;0.99999985935205;  
OK345675;Lepidoptera;Thymelicus lineola;Thymelicus lineola;1;Thymelicus  
lineola;0.999971535093703;  
OK345676;Lepidoptera;Carcharodus lavatherae;NA;0.333;Carcharodus lavatherae;0.99839243348919;  
OK345677;Lepidoptera;Pyrgus armoricanus;Pyrgus armoricanus;1;Pyrgus  
armoricanus;0.99997534125241;  
OK345678;Lepidoptera;Thymelicus sylvestris;Thymelicus sylvestris;1;Thymelicus  
sylvestris;0.99999985935205;

OK345679;Lepidoptera;Pyrgus armoricanus;Pyrgus armoricanus;0.001;Pyrgus armoricanus;0.998753483076232;  
OK345682;Lepidoptera;Pyrgus malvoides;NA;0.059;Pyrgus malvoides;0.886543025846984;  
OK345683;Lepidoptera;Erynnis tages;Erynnis tages;1;Erynnis tages;0.999999281987018;  
OK345685;Lepidoptera;Pyrgus malvoides;NA;0.027;Pyrgus malvoides;0.86049597517739;  
OK345687;Lepidoptera;Thymelicus sylvestris;Thymelicus sylvestris;1;Thymelicus sylvestris;0.99999979032367;  
OK345688;Lepidoptera;Erynnis tages;Erynnis tages;1;Erynnis tages;0.999999514201055;  
OK345689;Lepidoptera;Pyrgus andromedae;Pyrgus andromedae;1;Pyrgus andromedae;0.99780235345493;  
OK345694;Lepidoptera;Carcharodus lavatherae;Carcharodus lavatherae;1;Carcharodus lavatherae;0.999975293871709;  
OK345698;Lepidoptera;Pyrgus alveus;NA;NA;Pyrgus alveus;0.931326683565012;  
OK345700;Lepidoptera;Thymelicus acteon;Thymelicus acteon;1;Thymelicus acteon;0.999879480128335;  
OK345703;Lepidoptera;Ochlodes sylvanus;NA;0.115;Ochlodes sylvanus;0.996970874140115;  
OK345705;Lepidoptera;Carcharodus baeticus;Carcharodus baeticus;1;Carcharodus baeticus;0.999983326272056;  
OK345708;Lepidoptera;Pyrgus cacaliae;Pyrgus cacaliae;0.001;Pyrgus cacaliae;0.997160148319376;  
OK345711;Lepidoptera;Thymelicus sylvestris;Thymelicus sylvestris;1;Thymelicus sylvestris;0.999999701175;  
OK345712;Lepidoptera;Carcharodus alceae;Carcharodus alceae;1;Carcharodus alceae;0.99999990863188;  
OK345713;Lepidoptera;Pyrgus cacaliae;Pyrgus cacaliae;0.001;Pyrgus cacaliae;0.997160148319376;  
OK345717;Lepidoptera;Gegenes pumilio;Gegenes pumilio;1;Gegenes pumilio;0.999986726679266;  
OK345718;Lepidoptera;Gegenes pumilio;Gegenes pumilio;1;Gegenes pumilio;0.999986726679266;  
OK345719;Lepidoptera;Carcharodus alceae;Carcharodus alceae;0.999;Carcharodus alceae;0.99999996339511;  
OK345720;Lepidoptera;Pyrgus cacaliae;Pyrgus cacaliae;0.001;Pyrgus cacaliae;0.997160148319376;  
OK345721;Lepidoptera;Pyrgus armoricanus;Pyrgus armoricanus;1;Pyrgus armoricanus;0.999997353848817;  
OK345727;Lepidoptera;Gegenes pumilio;Gegenes pumilio;1;Gegenes pumilio;0.999986726679266;  
OK345728;Lepidoptera;Thymelicus acteon;Thymelicus acteon;1;Thymelicus acteon;0.9999999752248;  
OK345729;Lepidoptera;Pyrgus onopordi;Pyrgus onopordi;1;Pyrgus onopordi;0.999997111229755;  
OK345731;Lepidoptera;Pyrgus malvoides;NA;0.176;Pyrgus malvoides;0.940490890379026;  
OK345734;Lepidoptera;Carterocephalus palaemon;NA;0.052;Carterocephalus palaemon;0.728445051795325;  
OK345735;Lepidoptera;Carcharodus lavatherae;Carcharodus lavatherae;0.011;Carcharodus lavatherae;0.999824543116485;  
OK345736;Lepidoptera;Carcharodus baeticus;Carcharodus baeticus;1;Carcharodus baeticus;0.999983899664537;  
OK345738;Lepidoptera;Thymelicus sylvestris;Thymelicus sylvestris;1;Thymelicus sylvestris;0.99999985935205;  
OL457027;Lepidoptera;Callophrys rubi;NA;0.001;Callophrys rubi;0.995814883966124;  
OL457028;Lepidoptera;Callophrys rubi;NA;0.003;Callophrys rubi;0.997328639918919;  
OL457029;Lepidoptera;Callophrys rubi;NA;0.003;Callophrys rubi;0.997328639918919;  
OL457030;Lepidoptera;Callophrys rubi;NA;0.003;Callophrys rubi;0.997328639918919;  
OL457031;Lepidoptera;Callophrys rubi;NA;0.003;Callophrys rubi;0.997328639918919;  
OL457032;Lepidoptera;Callophrys rubi;NA;0.003;Callophrys rubi;0.997328639918919;  
OLEP059-15;Lepidoptera;Charaxes jasius;NA;0.845;Charaxes jasius;0.982370809305953;  
ON435775;Lepidoptera;Carcharodus alceae;Carcharodus alceae;0.002;Carcharodus alceae;0.99999996081357;  
ON435820;Lepidoptera;Erynnis tages;Erynnis tages;1;Erynnis tages;0.999999332195268;  
ON435830;Lepidoptera;Gegenes pumilio;Gegenes pumilio;1;Gegenes pumilio;0.999967682776052;  
ON436027;Lepidoptera;Aricia agestis;NA;0.125;Aricia agestis;0.995247553892498;  
ON436064;Lepidoptera;Scolitantides orion;Scolitantides orion;1;Scolitantides orion;0.99999926905704;  
ON436231;Lepidoptera;Anthocharis cardamines;Anthocharis cardamines;1;Anthocharis cardamines;0.99999932743523;  
ON436476;Lepidoptera;Colias hyale;Colias hyale;0.014;Colias hyale;0.999998016306882;  
ON436530;Lepidoptera;Lysandra coridon;NA;NA;0.997458199637002;  
ON436602;Lepidoptera;Iolana iolas;Iolana debilitata;1;Iolana debilitata;0.99958019943617;  
ON436691;Lepidoptera;Lasiommata megera megera;Lasiommata megera;0.001;Lasiommata megera;0.999418710722904;  
ON436711;Lepidoptera;Maniola hyperantus;Aphantopus hyperantus;0.002;Aphantopus hyperantus;0.999998157334594;  
ON436713;Lepidoptera;Issoria lathonia lathonia;Issoria lathonia;1;Issoria lathonia;0.99999999990109;  
ON436714;Lepidoptera;Brintesia circe;Brintesia circe;NA;Brintesia circe;0.999999574944729;  
ON436893;Lepidoptera;Boloria pales;Boloria pales;1;Boloria pales;0.997633944115225;  
ON437224;Lepidoptera;Brenthis daphne;Brenthis daphne;0.002;Brenthis daphne;0.997737388927468;  
ON437238;Lepidoptera;Erebia epiphron;NA;NA;Erebia epiphron;0.932281858468754;  
ON437239;Lepidoptera;Maniola jurtina;NA;NA;Maniola jurtina;0.932718112894061;  
ON437242;Lepidoptera;Colias croceus;NA;NA;0.99999999999753;  
ON437243;Lepidoptera;Coenonympha pamphilus;Coenonympha pamphilus;1;Coenonympha pamphilus;0.99999999999744;  
ON437244;Lepidoptera;Melanargia galathea;NA;NA;0.99999999999967;  
ON437314;Lepidoptera;Thymelicus lineola;Thymelicus lineola;1;Thymelicus lineola;0.999994272494067;  
ON437321;Lepidoptera;Satyrus ferula;NA;0.001;Satyrus ferula;0.982816150762778;

[illegible]

QQ181629;Lepidoptera;Polyommatus eros;NA;0.005;Polyommatus eros;0.95275169203039;  
QQ181660;Lepidoptera;Lycaena phlaeas;Lycaena phlaeas;1;Lycaena phlaeas;0.999999996363186;  
QQ181665;Lepidoptera;Hipparchia semele;NA;0.002;NA;0.999999999999939;  
QQ181667;Lepidoptera;Boloria pales;NA;0.005;Boloria pales;0.994636805952394;  
QQ181722;Lepidoptera;Gonepteryx rhamni;Gonepteryx rhamni;0.008;Gonepteryx  
rhamni;0.999527533936108;  
QQ181747;Lepidoptera;Melitaea cinxia;Melitaea cinxia;1;Melitaea cinxia;0.999999999999687;  
QQ181753;Lepidoptera;Lasiommata maera;Lasiommata maera;1;Lasiommata maera;0.999962126921626;  
QQ181776;Lepidoptera;Erebia pandrose;Erebia pandrose;0.013;Erebia pandrose;0.974388092470716;  
QQ181810;Lepidoptera;Pieris napi;NA;0.011;Pieris napi;0.801985394724814;  
QQ181841;Lepidoptera;Brenthis daphne;Brenthis daphne;0.003;Brenthis daphne;0.996410992468372;  
QQ181883;Lepidoptera;Satyrus ferula;NA;0.001;Satyrus ferula;0.995612186090573;  
QQ181889;Lepidoptera;Pyrgus alveus;NA;0.003;NA;0.99999999997732;  
QQ181894;Lepidoptera;Cupido minimus;NA;0.006;Cupido minimus;0.999768371759258;  
QQ181944;Lepidoptera;Brintesia circe;Brintesia circe;NA;Brintesia circe;0.999999813082031;  
QQ182017;Lepidoptera;Colias phicomone;NA;0.001;Colias phicomone;0.985598879697681;  
QQ182027;Lepidoptera;Plebejus argus;NA;0.122;Plebejus argus;0.956948912376078;  
QQ182055;Lepidoptera;Erebia neoridas;NA;NA;Erebia neoridas;0.997112686054603;  
QQ182057;Lepidoptera;Thymelicus sylvestris;NA;NA;Thymelicus sylvestris;0.999928623199089;  
QQ182117;Lepidoptera;Coenonympha arcania;NA;0.171;Coenonympha arcania;0.96593984271414;  
QQ182153;Lepidoptera;Cyaniris semiargus;NA;NA;Cyaniris semiargus;0.999051841766953;  
QQ182183;Lepidoptera;Colias alfacariensis;Colias alfacariensis;0.001;Colias  
alfacariensis;0.999926026317526;  
QQ182196;Lepidoptera;Melanargia galathea;Melanargia galathea;NA;Melanargia  
galathea;0.943414053575798;  
QQ182200;Lepidoptera;Thymelicus lineola;Thymelicus lineola;1;Thymelicus  
lineola;0.999995927238524;  
QQ182209;Lepidoptera;Agriades glandon;NA;0.001;Agriades glandon;0.986645583198728;  
QQ182281;Lepidoptera;Satyrus ferula;Satyrus ferula;0.001;Satyrus ferula;0.978098907764716;  
QQ182299;Lepidoptera;Issoria lathonia;Issoria lathonia;1;Issoria lathonia;0.99999999989257;  
QQ182316;Lepidoptera;Satyrium spini;Satyrium spini;1;Satyrium spini;0.99999851808479;  
QQ182341;Lepidoptera;Aricia artaxerxes;Aricia artaxerxes;0.001;Aricia  
artaxerxes;0.998553055757568;  
QQ182347;Lepidoptera;Argynnis aglaja;NA;NA;Speyeria aglaja;0.872991147917853;  
QQ182359;Lepidoptera;Polygonia c-album;NA;0.215;NA;0.999999192918557;  
QQ182364;Lepidoptera;Aglais urticae;Aglais urticae;0.004;Aglais urticae;0.995258618170429;  
QQ182386;Lepidoptera;Melitaea didyma;Melitaea didyma;1;Melitaea didyma;0.999564278580338;  
QQ182454;Lepidoptera;Celastrina argiolus;Celastrina argiolus;0.997;Celastrina  
argiolus;0.998052589239512;  
QQ182458;Lepidoptera;Erebia mnestra;Erebia mnestra;0.002;Erebia mnestra;0.999845899963913;  
QQ182467;Lepidoptera;Pyrgus alveus;NA;NA;NA;0.999999999996961;  
QQ182487;Lepidoptera;Coenonympha pamphilus;Coenonympha pamphilus;1;Coenonympha  
pamphilus;0.99999999999744;  
QQ182502;Lepidoptera;Polyommatus damon;Polyommatus damon;1;Polyommatus damon;0.99999890455973;  
QQ182529;Lepidoptera;Polyommatus dorylas;NA;0.01;Polyommatus dorylas;0.989179810320075;  
QQ182591;Lepidoptera;Polyommatus icarus;NA;0.003;Polyommatus icarus;0.998348220031726;  
QQ182597;Lepidoptera;Euphydryas Cynthia;Euphydryas Cynthia;1;Euphydryas  
Cynthia;0.99999999705039;  
QQ182622;Lepidoptera;Maniola jurtina;NA;0.07;NA;0.999999999998966;  
QQ182643;Lepidoptera;Ochlodes sylvanus;NA;0.322;Ochlodes sylvanus;0.995871064726767;  
QQ182650;Lepidoptera;Erebia pandrose;Erebia pandrose;0.013;Erebia pandrose;0.974388092470716;  
QQ182682;Lepidoptera;Erebia melampus;NA;NA;Erebia melampus;0.914071830164708;  
QQ182733;Lepidoptera;Pyrgus malvoides;NA;0.176;Pyrgus malvoides;0.940490890379026;  
QQ182752;Lepidoptera;Coenonympha gardetta;NA;0.107;NA;0.999999999999967;  
QQ182764;Lepidoptera;Pyrgus carthami;Pyrgus carthami;1;Pyrgus carthami;0.99998997209607;  
QQ182801;Lepidoptera;Plebejus idas;Plebejus idas;0.001;NA;0.999655983096466;  
QQ182825;Lepidoptera;Pieris napi;NA;NA;Pieris napi;0.798861363901012;  
QQ182880;Lepidoptera;Polyommatus escheri;Polyommatus escheri;1;Polyommatus  
escheri;0.99999968891729;  
QQ182930;Lepidoptera;Lasiommata megera;Lasiommata megera;1;Lasiommata megera;0.999928528239676;  
QQ182990;Lepidoptera;Boloria titania;Boloria titania;0.999;Boloria titania;0.999431261609546;  
QQ183003;Lepidoptera;Lycaena tityrus;Lycaena tityrus;1;Lycaena tityrus;0.99995729087172;  
QQ183019;Lepidoptera;Erebia melampus;NA;NA;Erebia melampus;0.914071830164708;  
QQ183040;Lepidoptera;Melitaea didyma;Melitaea didyma;1;Melitaea didyma;0.999254115195077;  
QQ183082;Lepidoptera;Pieris napi;NA;0.011;Pieris napi;0.801985394724814;  
QQ183101;Lepidoptera;Aporia crataegi;NA;0.012;Aporia crataegi;0.999993820934767;  
QQ183136;Lepidoptera;Thymelicus sylvestris;NA;0.324;Thymelicus sylvestris;0.999940778442454;  
QQ183154;Lepidoptera;Aricia artaxerxes;NA;0.001;Aricia artaxerxes;0.998546425606378;  
OU426913.1;Lepidoptera;Thymelicus sylvestris;NA;0.324;Thymelicus sylvestris;0.999940778442454;  
OU426977.1;Lepidoptera;Pyrgus malvae;Pyrgus malvae;0.999;Pyrgus malvae;0.993531783407179;  
OU723912;Lepidoptera;Limenitis camilla;Limenitis camilla;0.02;NA;0.961893171755625;  
OU723913;Lepidoptera;Limenitis camilla;Limenitis camilla;0.02;NA;0.961893171755625;  
OU723914;Lepidoptera;Limenitis camilla;Limenitis camilla;0.02;NA;0.961893171755625;  
OU723915;Lepidoptera;Limenitis camilla;Limenitis camilla;0.02;NA;0.961893171755625;  
OXB1591-16;Lepidoptera;Polyommatus coridon;Polyommatus amandus;0.004;Polyommatus  
amandus;0.999992140596893;  
OXB1596-16;Lepidoptera;Plebejus idas;NA;0.001;NA;0.998518811781132;  
PANAG001-20;Lepidoptera;Parnassius apollo;Parnassius apollo;NA;NA;0.990986284674012;

PANAG002-20;Lepidoptera;Parnassius apollo;Parnassius apollo;NA;NA;0.990986284674012;  
PANAG003-20;Lepidoptera;Parnassius apollo;Parnassius apollo;NA;NA;0.990986284674012;  
PANAG004-20;Lepidoptera;Parnassius apollo;Parnassius apollo;NA;NA;0.990986284674012;  
PHLAB625-10;Lepidoptera;Coenonympha darwiniana;NA;0.002;NA;0.999999927753664;  
PHLAI548-13;Lepidoptera;Boloria selene;NA;0.17;Boloria selene;0.999998946589486;  
RDBBC320-05;Lepidoptera;Aglaia urticae;NA;NA;Aglaia urticae;0.985780134057395;  
RDBBC321-05;Lepidoptera;Aglaia urticae;Aglaia urticae;0.001;Aglaia urticae;0.724572358837189;  
RDBBC322-05;Lepidoptera;Aglaia urticae;NA;NA;Aglaia urticae;0.985780134057395;  
SACOL158-17;Lepidoptera;Colias hyale;NA;NA;Colias hyale;0.999975737287978;  
SACOL167-17;Lepidoptera;Colias hyale;NA;0.007;Colias hyale;0.999762486760575;  
SACOL168-17;Lepidoptera;Colias hyale;NA;0.007;Colias hyale;0.999762486760575;  
SACOL169-17;Lepidoptera;Colias hyale;NA;NA;Colias hyale;0.999989891599216;  
SACOL170-17;Lepidoptera;Colias hyale;NA;NA;Colias hyale;0.999989891599216;  
SACOL178-17;Lepidoptera;Colias hyale;NA;NA;Colias hyale;0.999975737287978;  
SACOL181-17;Lepidoptera;Colias hyale;NA;0.488;Colias hyale;0.999915488936852;  
SACOL182-17;Lepidoptera;Colias hyale;NA;0.488;Colias hyale;0.999915488936852;  
SACOL183-17;Lepidoptera;Colias alfajariensis;Colias alfajariensis;1;Colias  
alfajariensis;0.999986994131001;  
SACOL184-17;Lepidoptera;Colias alfajariensis;Colias alfajariensis;1;Colias  
alfajariensis;0.999972577281217;  
SACOL185-17;Lepidoptera;Colias alfajariensis;Colias alfajariensis;0.001;Colias  
alfajariensis;0.999966522684745;  
SACOL186-17;Lepidoptera;Colias alfajariensis;Colias alfajariensis;1;Colias  
alfajariensis;0.999986994131001;  
SACOL230-18;Lepidoptera;Colias alfajariensis;Colias alfajariensis;0.001;Colias  
alfajariensis;0.999966522684745;  
SACOL231-18;Lepidoptera;Colias alfajariensis;Colias alfajariensis;1;Colias  
alfajariensis;0.999986994131001;  
SACOL232-18;Lepidoptera;Colias alfajariensis;Colias alfajariensis;1;Colias  
alfajariensis;0.999986994131001;  
SACOL236-18;Lepidoptera;Colias alfajariensis;Colias alfajariensis;0.001;Colias  
alfajariensis;0.999926026317526;  
SACOL237-18;Lepidoptera;Colias alfajariensis;Colias alfajariensis;1;Colias  
alfajariensis;0.999986994131001;  
SACOL238-18;Lepidoptera;Colias alfajariensis;Colias alfajariensis;1;Colias  
alfajariensis;0.999986994131001;  
SACOL240-18;Lepidoptera;Colias alfajariensis;Colias alfajariensis;0.001;Colias  
alfajariensis;0.999966522684745;  
SACOL241-18;Lepidoptera;Colias alfajariensis;Colias alfajariensis;1;Colias  
alfajariensis;0.999986994131001;  
SACOL243-18;Lepidoptera;Colias hyale;NA;0.172;Colias hyale;0.999980048579994;  
SACOL244-18;Lepidoptera;Colias hyale;NA;NA;Colias hyale;0.999989891599216;  
SACOL245-18;Lepidoptera;Colias hyale;Colias hyale;0.01;Colias hyale;0.99997814754068;  
SACOL247-18;Lepidoptera;Colias hyale;NA;0.488;Colias hyale;0.999915488936852;  
SACOL248-18;Lepidoptera;Colias hyale;NA;0.001;Colias hyale;0.99993895126992;  
SACOL250-18;Lepidoptera;Colias hyale;NA;0.182;Colias hyale;0.999985476291241;  
SACOL255-18;Lepidoptera;Colias hyale;Colias hyale;0.015;Colias hyale;0.99997884296128;  
SACOL268-18;Lepidoptera;Colias hyale;NA;0.007;Colias hyale;0.999762486760575;  
SACOL269-18;Lepidoptera;Colias hyale;NA;0.007;Colias hyale;0.999762486760575;  
SACOL270-18;Lepidoptera;Colias hyale;NA;0.007;Colias hyale;0.999762486760575;  
SACOL271-18;Lepidoptera;Colias hyale;NA;0.007;Colias hyale;0.999762486760575;  
SACOL272-18;Lepidoptera;Colias hyale;NA;0.007;Colias hyale;0.999762486760575;  
SACOL273-18;Lepidoptera;Colias hyale;NA;0.007;Colias hyale;0.999762486760575;  
SACOL283-18;Lepidoptera;Colias hyale;NA;0.007;Colias hyale;0.999762486760575;  
SACOL331-19;Lepidoptera;Colias hyale;NA;NA;Colias hyale;0.999978972221635;  
SACOL332-19;Lepidoptera;Colias hyale;NA;0.486;Colias hyale;0.99993342382893;  
SACOL333-19;Lepidoptera;Colias hyale;NA;NA;Colias hyale;0.999975737287978;  
SACOL345-19;Lepidoptera;Colias alfajariensis;Colias alfajariensis;1;Colias  
alfajariensis;0.999965969304576;  
SHIBU015-13;Lepidoptera;Aporia crataegi;NA;NA;Aporia crataegi;0.999996781126733;  
SHIBU112-13;Lepidoptera;Aporia crataegi;NA;0.072;Aporia crataegi;0.999989970020033;  
SNA088-07;Lepidoptera;Boloria selene;NA;0.391;Boloria selene;0.999998070947853;  
SYMB453-20;Lepidoptera;Satyrium w-album;NA;0.001;NA;0.999074451901155;  
TDAAT1354-20;Lepidoptera;Polyommatus eros;NA;0.005;Polyommatus eros;0.95275169203039;  
TDAAT1355-20;Lepidoptera;Pyrgus alveus;NA;0.001;NA;0.9999999999968;  
TDAAT1444-20;Lepidoptera;Cyaniris semiargus;NA;NA;Cyaniris semiargus;0.999051841766953;  
TDAAT2040-20;Lepidoptera;Lycaena virgaureae;NA;0.186;Lycaena virgaureae;0.999491227342155;  
TDAAT2041-20;Lepidoptera;Pyrgus alveus;NA;0.003;NA;0.999999999997732;  
TDAAT915-20;Lepidoptera;Cyaniris semiargus;NA;NA;Cyaniris semiargus;0.997783560275091;  
TDAAT916-20;Lepidoptera;Lycaena tityrus;Lycaena tityrus;1;Lycaena tityrus;0.999995729087172;  
TDAAT917-20;Lepidoptera;Coenonympha gardetta;NA;0.002;NA;0.99999999999945;  
TSZJK790-16;Lepidoptera;Polyommatus icarus;Polyommatus icarus;0.001;Polyommatus  
icarus;0.999502010289466;  
VNMB107-08;Lepidoptera;Gegenes pumilio;Gegenes pumilio;1;Gegenes pumilio;0.999986726679266;  
VNMB111-08;Lepidoptera;Gegenes pumilio;Gegenes pumilio;0.001;Gegenes pumilio;0.999984636655892;  
VNMB327-08;Lepidoptera;Gegenes pumilio;Gegenes pumilio;1;Gegenes pumilio;0.999986726679266;  
VNMB328-08;Lepidoptera;Gegenes pumilio;Gegenes pumilio;1;Gegenes pumilio;0.999986726679266;  
VNMB332-08;Lepidoptera;Gegenes pumilio;Gegenes pumilio;1;Gegenes pumilio;0.999986726679266;



VNMB333-08;Lepidoptera;Gegenes pumilio;Gegenes pumilio;1;Gegenes pumilio;0.999986726679266;  
VNMB334-08;Lepidoptera;Gegenes pumilio;Gegenes pumilio;1;Gegenes pumilio;0.999986726679266;  
VNMB335-08;Lepidoptera;Gegenes nostrodamus;Gegenes nostrodamus;0.023;Gegenes  
nostrodamus;0.94140474588328;  
VNMB336-08;Lepidoptera;Gegenes nostrodamus;Gegenes nostrodamus;1;Gegenes  
nostrodamus;0.99999996883645;  
WMB068-11;Lepidoptera;Polyommatus celina;Polyommatus celina;0.001;Polyommatus  
celina;0.9999999974969;  
WMB069-11;Lepidoptera;Polyommatus celina;Polyommatus celina;0.001;Polyommatus  
celina;0.9999999974969;  
WMB131-11;Lepidoptera;Polyommatus celina;NA;0.072;Polyommatus celina;0.99999999953559;  
WMB223-11;Lepidoptera;Polyommatus celina;Polyommatus celina;0.009;Polyommatus  
celina;0.99999999739714;  
WMB226-11;Lepidoptera;Polyommatus celina;NA;0.021;Polyommatus celina;0.99999999814662;  
WMB229-11;Lepidoptera;Polyommatus celina;Polyommatus celina;0.001;Polyommatus  
celina;0.99999999833364;  
WMB6525-18;Lepidoptera;Polyommatus icarus;NA;0.001;Polyommatus icarus;0.988079488562884;  
WMB6526-18;Lepidoptera;Polyommatus icarus;NA;0.001;Polyommatus icarus;0.988079488562884;  
WMB6527-18;Lepidoptera;Polyommatus icarus;NA;0.001;Polyommatus icarus;0.988079488562884;  
WMB6528-18;Lepidoptera;Polyommatus icarus;NA;0.001;Polyommatus icarus;0.988079488562884;  
WMB6554-18;Lepidoptera;Coenonympha corinna;Coenonympha corinna;0.001;Coenonympha  
corinna;0.99982032676622;  
WMB6630-18;Lepidoptera;Polyommatus icarus;NA;0.002;Polyommatus icarus;0.997043403297368;  
WMB6631-18;Lepidoptera;Polyommatus icarus;NA;0.002;Polyommatus icarus;0.997043403297368;  
WMB6791-19;Lepidoptera;Colias crocea;NA;0.059;NA;0.99999999999738;  
WMB6792-19;Lepidoptera;Lycaena phlaeas;Lycaena phlaeas;1;Lycaena phlaeas;0.999999998167567;  
WMB6793-19;Lepidoptera;Lycaena phlaeas;Lycaena phlaeas;1;Lycaena phlaeas;0.999999998167567;  
WMB6802-19;Lepidoptera;Boloria euphrosyne;Boloria euphrosyne;0.001;Boloria  
euphrosyne;0.99999733375833;  
WMB6803-19;Lepidoptera;Vanessa atalanta;Vanessa atalanta;1;Vanessa atalanta;0.99999999757762;  
WMB6804-19;Lepidoptera;Polygonia c-album;NA;0.215;NA;0.999999192918557;  
WMB6805-19;Lepidoptera;Polyommatus icarus;Lysandra bellargus;NA;Lysandra  
bellargus;0.992615225794049;  
WMB6807-19;Lepidoptera;Aporia crataegi;NA;NA;Aporia crataegi;0.999996781126733;  
WMB6808-19;Lepidoptera;Coenonympha arcania;NA;0.172;Coenonympha arcania;0.963036309473038;  
WMB6809-19;Lepidoptera;Cupido minimus;NA;0.006;Cupido minimus;0.999768371759258;  
WMB6810-19;Lepidoptera;Coenonympha arcania;NA;0.172;Coenonympha arcania;0.963036309473038;  
WMB6811-19;Lepidoptera;Aglaia urticae;NA;0.002;Aglaia urticae;0.987497593219019;  
WMB6812-19;Lepidoptera;Anthocharis cardamines;Anthocharis cardamines;1;Anthocharis  
cardamines;0.999999982988612;  
WMB6813-19;Lepidoptera;Aporia crataegi;NA;NA;Aporia crataegi;0.999996899001592;  
WMB6814-19;Lepidoptera;Boloria titania;Boloria titania;0.999;Boloria titania;0.999431261609546;  
WMB6815-19;Lepidoptera;Celastrina argiolus;Celastrina argiolus;1;Celastrina  
argiolus;0.999527385150531;  
WMB6816-19;Lepidoptera;Coenonympha pamphilus;Coenonympha pamphilus;1;Coenonympha  
pamphilus;0.99999999999744;  
WMB6821-19;Lepidoptera;Melitaea cinxia;Melitaea cinxia;1;Melitaea cinxia;0.99999999999801;  
WMB6827-19;Lepidoptera;Pieris napi;NA;0.011;Pieris napi;0.801985394724814;  
WMB6828-19;Lepidoptera;Plebejus idas;NA;0.001;NA;0.998518811781132;  
WMB6834-19;Lepidoptera;Aphantopus hyperantus;Aphantopus hyperantus;0.006;Aphantopus  
hyperantus;0.999998615504572;  
WMB6835-19;Lepidoptera;Aphantopus hyperantus;Aphantopus hyperantus;0.006;Aphantopus  
hyperantus;0.999998615504572;  
WMB6836-19;Lepidoptera;Boloria euphrosyne;Boloria euphrosyne;1;Boloria  
euphrosyne;0.99999204024765;  
WMB6838-19;Lepidoptera;Celastrina argiolus;Celastrina argiolus;1;Celastrina  
argiolus;0.999527385150531;  
WMB6839-19;Lepidoptera;Issoria lathonia;Issoria lathonia;1;Issoria lathonia;0.999999999989257;  
WMB6841-19;Lepidoptera;Lasiommata maera;Lasiommata maera;1;Lasiommata maera;0.999988599344549;  
WMB6845-19;Lepidoptera;Lampides boeticus;Lampides boeticus;1;Lampides  
boeticus;0.99999999545906;  
WMB6846-19;Lepidoptera;Satyrus ferula;Satyrus ferula;0.001;Satyrus ferula;0.992107254386621;  
WMB6847-19;Lepidoptera;Boloria titania;Boloria titania;0.999;Boloria titania;0.999431261609546;  
WMB6850-19;Lepidoptera;Euphydryas aurinia;NA;0.31;Euphydryas aurinia;0.993387708761386;  
WMB6851-19;Lepidoptera;Plebejus argus;NA;0.122;Plebejus argus;0.956948912376078;  
WMB6852-19;Lepidoptera;Anthocharis cardamines;Anthocharis cardamines;1;Anthocharis  
cardamines;0.9999997953563;  
WMB6854-19;Lepidoptera;Callophrys rubi;NA;0.002;Callophrys rubi;0.998841790162773;  
WMB6857-19;Lepidoptera;Cupido osiris;NA;0.009;Cupido minimus;0.999791453712643;  
WMB6860-19;Lepidoptera;Euphydryas aurinia;NA;0.31;Euphydryas aurinia;0.993387708761386;  
WMB6861-19;Lepidoptera;Lasiommata maera;Lasiommata maera;1;Lasiommata maera;0.999988599344549;  
WMB6867-19;Lepidoptera;Parnassius apollo;Parnassius apollo;1;Parnassius  
apollo;0.992704703916692;  
WMB6869-19;Lepidoptera;Polyommatus dorylas;NA;0.514;Polyommatus dorylas;0.972144432302025;  
WMB6870-19;Lepidoptera;Plebejus argus;NA;0.122;Plebejus argus;0.956948912376078;  
WMB6876-19;Lepidoptera;Coenonympha pamphilus;Coenonympha pamphilus;1;Coenonympha  
pamphilus;0.99999999999744;  
WMB6877-19;Lepidoptera;Colias phicomone;NA;0.001;Colias phicomone;0.983297137442123;

WMB6878-19;Lepidoptera;Cupido minimus;NA;0.006;Cupido minimus;0.999768371759258;  
WMB6880-19;Lepidoptera;Pyrgus alveus;NA;0.003;NA;0.99999999997732;  
WMB6882-19;Lepidoptera;Coenonympha darwiniana;NA;0.12;NA;0.99999999999993;  
WMB6883-19;Lepidoptera;Colias phicomone;NA;0.001;Colias phicomone;0.952883886460673;  
WMB6884-19;Lepidoptera;Erebia mnestra;Erebia mnestra;NA;Erebia mnestra;0.999930290762394;  
WMB6885-19;Lepidoptera;Papilio machaon;Papilio machaon;0.001;Papilio machaon;0.999375457040949;  
WMB6887-19;Lepidoptera;Polyommatus eros;NA;0.005;Polyommatus eros;0.95275169203039;  
WMB6891-19;Lepidoptera;Polyommatus escheri;NA;NA;NA;0.995883262983176;  
WMB6898-19;Lepidoptera;Erebia meolans;Erebia meolans;NA;Erebia meolans;0.999885150395991;  
WMB6899-19;Lepidoptera;Polyommatus escheri;Polyommatus escheri;1;Polyommatus  
escheri;0.99999985682649;  
WMB6900-19;Lepidoptera;Polyommatus thersites;Polyommatus thersites;0.002;Polyommatus  
thersites;0.99999628802795;  
WMB6901-19;Lepidoptera;Pyrgus alveus;NA;0.003;NA;0.99999999997732;  
WMB6902-19;Lepidoptera;Erebia tyndarus;NA;NA;NA;0.99999999999866;  
WMB6903-19;Lepidoptera;Pyrgus alveus;NA;0.003;NA;0.99999999997732;  
WMB6905-19;Lepidoptera;Melitaea varia;Melitaea varia;0.998;Melitaea varia;0.999992656418633;  
WMB6906-19;Lepidoptera;Aricia artaxerxes;Aricia artaxerxes;0.001;Aricia  
artaxerxes;0.998483635926436;  
WMB6907-19;Lepidoptera;Plebejus idas;NA;0.007;NA;0.999546324331549;  
WMB6909-19;Lepidoptera;Erebia tyndarus;NA;NA;NA;0.9999999999737;  
WMB6912-19;Lepidoptera;Polyommatus eros;NA;0.005;Polyommatus eros;0.95275169203039;  
WMB6913-19;Lepidoptera;Pyrgus malvoides;NA;0.003;NA;0.99999999997732;  
WMB6914-19;Lepidoptera;Erebia pandrose;Erebia pandrose;0.005;Erebia pandrose;0.968390884300325;  
WMB6915-19;Lepidoptera;Erebia mnestra;Erebia mnestra;0.002;Erebia mnestra;0.999918417100471;  
WMB6916-19;Lepidoptera;Erebia mnestra;Erebia mnestra;0.999;Erebia mnestra;0.999939685054388;  
WMB6917-19;Lepidoptera;Melitaea varia;Melitaea varia;0.998;Melitaea varia;0.999996785223653;  
WMB6918-19;Lepidoptera;Polyommatus eros;NA;0.004;Polyommatus eros;0.90500876419786;  
WMB6919-19;Lepidoptera;Plebejus idas;NA;0.001;NA;0.999282036449686;  
WMB6923-19;Lepidoptera;Pyrgus malvoides;NA;NA;Pyrgus carlinae;0.855949865383567;  
WMB6924-19;Lepidoptera;Pyrgus malvoides;NA;NA;Pyrgus carlinae;0.855949865383567;  
WMB6926-19;Lepidoptera;Pyrgus armoricanus;NA;NA;Pyrgus carlinae;0.854199018204849;  
WMB6927-19;Lepidoptera;Pyrgus armoricanus;NA;0.003;NA;0.99999999997732;  
WMB6929-19;Lepidoptera;Pyrgus armoricanus;NA;NA;Pyrgus carlinae;0.855949865383567;  
WMB6930-19;Lepidoptera;Boloria selene;Boloria selene;0.275;Boloria selene;0.99999702697396;  
WMB6931-19;Lepidoptera;Colias palaeno;NA;NA;NA;0.99999999534527;  
WMB6932-19;Lepidoptera;Colias phicomone;NA;0.001;Colias phicomone;0.985598879697681;  
WMB6933-19;Lepidoptera;Erebia tyndarus;NA;NA;NA;0.99999999999783;  
WMB6934-19;Lepidoptera;Euphydryas cynthia;Euphydryas cynthia;1;Euphydryas  
cynthia;0.99999999705039;  
WMB6937-19;Lepidoptera;Polyommatus eros;NA;0.005;Polyommatus eros;0.95275169203039;  
WMB6940-19;Lepidoptera;Colias phicomone;NA;0.001;Colias phicomone;0.985598879697681;  
WMB6941-19;Lepidoptera;Cupido osiris;NA;0.006;Cupido minimus;0.999768371759258;  
WMB6942-19;Lepidoptera;Erebia montana;Erebia montana;1;Erebia montana;0.999855571743067;  
WMB6944-19;Lepidoptera;Polyommatus dorylas;NA;0.002;Polyommatus dorylas;0.71000381652843;  
ZMBN109-16;Lepidoptera;Coenonympha pamphilus;Coenonympha pamphilus;1;Coenonympha  
pamphilus;0.99999999999886;  
ZMBN277-16;Lepidoptera;Plebejus idas;NA;0.007;NA;0.999546324331549;  
ZMBN658-17;Lepidoptera;Ochlodes sylvanus;NA;0.316;Ochlodes sylvanus;0.996318754838625;  
ZMBN660-17;Lepidoptera;Callophrys rubi;NA;0.001;Callophrys rubi;0.996657374742025;  
ZMBN664-17;Lepidoptera;Anthocharis cardamines;Anthocharis cardamines;1;Anthocharis  
cardamines;0.999999940675226;  
ZMBN668-17;Lepidoptera;Gonepteryx rhamni;NA;0.474;Gonepteryx rhamni;0.982076396127858;  
ZMBN953-17;Lepidoptera;Vanessa atalanta;Vanessa atalanta;1;Vanessa atalanta;0.999999999757762;  
ZMBN954-17;Lepidoptera;Pieris napi;NA;NA;Pieris napi;0.909529804062059;  
AF104649;Odonata;Lasioglossum laevigatum;Lasioglossum laevigatum;1;NA;0.999999999999987;  
AF104655;Odonata;Lasioglossum sexnotatum;Lasioglossum sexnotatum;1;NA;0.747554421082678;  
JX256691;Odonata;Sphecodes hyalinatus;Sphecodes hyalinatus;0.001;NA;0.999999999999978;  
JX256692;Odonata;Sphecodes hyalinatus;Sphecodes hyalinatus;0.003;NA;0.999999999999966;  
MF416101;Odonata;Andrena hattorfiana;Andrena hattorfiana;1;NA;0.99999999999994;  
MH458485;Odonata;Lasioglossum majus;NA;NA;NA;0.999999963033858;  
AM696290;Odonata;Nehalennia speciosa;Nehalennia speciosa;1;Nehalennia speciosa;1;  
AM696291;Odonata;Nehalennia speciosa;Nehalennia speciosa;1;Nehalennia speciosa;1;  
ANBIO098-19;Odonata;Libellula depressa;Libellula depressa;1;Libellula depressa;1;  
ANBIO100-19;Odonata;Anax imperator;NA;0.002;Anax parthenope;0.826899143940038;  
ANBIO101-19;Odonata;Sympetrum striolatum;Sympetrum sanguineum;1;Sympetrum sanguineum;1;  
ANBIO150-19;Odonata;Ischnura elegans;NA;0.001;Ischnura elegans;0.989041928995569;  
ANBIO195-19;Odonata;Ischnura elegans;NA;0.003;Ischnura elegans;0.993427365439581;  
ANBIO202-19;Odonata;Coenagrion puella;NA;0.061;NA;100.000.000.000.001;  
ANBIO203-19;Odonata;Ischnura elegans;NA;0.001;Ischnura elegans;0.994521448478294;  
AODON001-20;Odonata;Libellula quadrimaculata;Libellula quadrimaculata;1;NA;0.999999999999938;  
AODON003-20;Odonata;Pyrrhosoma nymphula;Pyrrhosoma nymphula;NA;Pyrrhosoma  
elisabethae;0.995577502805767;  
AODON006-20;Odonata;Sympecma fusca;Sympecma fusca;1;Sympecma fusca;0.779480293459224;  
AODON007-20;Odonata;Coenagrion puella;NA;0.078;Coenagrion ornatum;0.803141391253347;  
AODON014-20;Odonata;Calopteryx virgo;Calopteryx virgo;1;NA;0.999999999999985;  
AODON016-20;Odonata;Platycnemis pennipes;Platycnemis pennipes;1;NA;0.999999999999965;  
AODON017-20;Odonata;Ischnura elegans;NA;0.005;Ischnura saharensis;0.81110088018812;

AODON025-20;Odonata;Enallagma cyathigerum;NA;NA;Enallagma divagans;0.786499292264595;  
AODON028-20;Odonata;Libellula depressa;Libellula depressa;1;Libellula depressa;0.980463400328985;  
AODON032-20;Odonata;Erythromma najas;Erythromma najas;1;NA;0.99999999999972;  
AODON034-20;Odonata;Sympecma fusca;Sympecma fusca;1;NA;0.99999999999959;  
AODON037-20;Odonata;Brachytron pratense;Brachytron pratense;1;NA;0.723752897962802;  
AODON039-20;Odonata;Ischnura pumilio;Ischnura pumilio;1;Ischnura pumilio;0.999999630443438;  
AODON041-20;Odonata;Orthetrum albistylum;Orthetrum albistylum;1;NA;0.99999999999947;  
AODON052-20;Odonata;Calopteryx splendens;NA;NA;Calopteryx xanthostoma;0.999992261858876;  
AODON054-20;Odonata;Ischnura elegans;NA;0.005;Ischnura saharensis;0.81110088018812;  
AODON059-20;Odonata;Crocothemis erythraea;Crocothemis erythraea;1;NA;0.99999999999975;  
AODON063-20;Odonata;Anax parthenope;NA;0.043;Anax tristis;0.736523853332882;  
AODON066-20;Odonata;Orthetrum cancellatum;Orthetrum cancellatum;1;NA;0.99999999999965;  
AODON070-20;Odonata;Somatochlora flavomaculata;Somatochlora flavomaculata;1;NA;0.735429655766997;  
AODON072-20;Odonata;Libellula fulva;Libellula fulva;1;NA;0.99999999999934;  
AODON080-20;Odonata;Leucorrhinia pectoralis;Leucorrhinia pectoralis;1;Leucorrhinia pectoralis;0.996638025629021;  
AODON081-20;Odonata;Anax imperator;NA;0.037;NA;0.999393070558932;  
AODON091-20;Odonata;Sympetrum sanguineum;Sympetrum sanguineum;1;NA;0.99999999999982;  
AODON092-20;Odonata;Erythromma viridulum;Erythromma viridulum;1;NA;0.99999999999977;  
AODON099-20;Odonata;Orthetrum coerulescens;Orthetrum coerulescens;1;NA;0.99999999999957;  
AODON100-20;Odonata;Orthetrum brunneum;NA;NA;Orthetrum anceps;0.998958403730038;  
AODON102-20;Odonata;Orthetrum cancellatum;Orthetrum cancellatum;0.001;NA;0.99999999999953;  
AODON103-20;Odonata;Aeshna cyanea;NA;0.254;NA;0.99999999999941;  
AODON111-20;Odonata;Sympetrum vulgatum;Sympetrum vulgatum;1;Sympetrum vulgatum;0.998384056568351;  
AODON115-20;Odonata;Aeshna affinis;Aeshna affinis;1;Aeshna affinis;0.982978864117626;  
AODON116-20;Odonata;Sympetrum pedemontanum;Sympetrum pedemontanum;1;NA;0.99999999999947;  
AODON117-20;Odonata;Lestes sponsa;Lestes sponsa;NA;NA;0.953021874463194;  
AODON127-20;Odonata;Aeshna mixta;Aeshna mixta;1;NA;0.99999999999985;  
AODON129-20;Odonata;Sympetrum striolatum;Sympetrum striolatum;1;NA;0.99999999999947;  
AODON131-20;Odonata;Somatochlora metallica;NA;NA;NA;0.99999999999965;  
AODON139-20;Odonata;Sympetrum striolatum;Sympetrum striolatum;1;NA;0.99999999999976;  
AODON142-20;Odonata;Somatochlora arctica;Somatochlora arctica;1;Somatochlora arctica;0.77647725496558;  
AODON144-20;Odonata;Aeshna juncea;NA;0.021;NA;0.99999999999932;  
AODON147-20;Odonata;Leucorrhinia dubia;NA;0.003;NA;0.99999999999959;  
AODON149-20;Odonata;Enallagma cyathigerum;NA;0.082;Enallagma divagans;0.862260666341213;  
AODON152-20;Odonata;Aeshna grandis;Aeshna grandis;1;NA;0.99999999999981;  
AODON155-20;Odonata;Somatochlora alpestris;Somatochlora alpestris;1;NA;0.7772763763544;  
AODON165-20;Odonata;Aeshna mixta;Aeshna mixta;1;NA;0.99999999999978;  
AODON168-20;Odonata;Crocothemis erythraea;Crocothemis erythraea;0.003;NA;0.99999999999946;  
AODON262-20;Odonata;Sympetrum danae;Sympetrum danae;1;NA;0.99999999999971;  
AODON302-20;Odonata;Sympetrum danae;Sympetrum danae;1;NA;0.99999999999958;  
AODON327-20;Odonata;Sympetrum sanguineum;Sympetrum sanguineum;1;Sympetrum sanguineum;1;  
AODON330-20;Odonata;Lestes virens;Lestes virens;1;NA;0.99999999999961;  
AODON374-20;Odonata;Sympetrum meridionale;Sympetrum striolatum;0.019;NA;0.9999999999995;  
AODON416-20;Odonata;Gomphus vulgatissimus;Gomphus vulgatissimus;0.001;Gomphus vulgatissimus;0.966466075887929;  
AODON436-20;Odonata;Gomphus vulgatissimus;Gomphus vulgatissimus;0.001;Gomphus vulgatissimus;0.968172816516904;  
AODON439-20;Odonata;Enallagma cyathigerum;NA;0.001;Enallagma divagans;0.772612854575891;  
AODON441-20;Odonata;Erythromma lindenii;Erythromma lindenii;1;NA;0.99999999999961;  
AODON451-20;Odonata;Calopteryx splendens;NA;NA;Calopteryx xanthostoma;0.999992274914344;  
AODON454-20;Odonata;Orthetrum brunneum;NA;0.008;Orthetrum anceps;0.997997884601359;  
AODON455-20;Odonata;Ophiogomphus cecilia;Ophiogomphus cecilia;1;NA;0.99999999999998;  
AODON456-20;Odonata;Ischnura elegans;NA;0.007;Ischnura saharensis;0.811213774807623;  
AODON457-20;Odonata;Calopteryx splendens;NA;NA;Calopteryx xanthostoma;0.999992261858876;  
AODON536-20;Odonata;Somatochlora meridionalis;NA;NA;NA;0.99999999999941;  
AODON563-20;Odonata;Sympetrum meridionale;Sympetrum striolatum;0.019;NA;0.99999999999934;  
AODON586-20;Odonata;Aeshna subarctica;Aeshna subarctica;1;NA;0.99999999999942;  
AODON588-20;Odonata;Sympetrum sanguineum;Sympetrum sanguineum;1;NA;0.99999999999994;  
AODON611-20;Odonata;Aeshna caerulea;NA;0.002;Aeshna septentrionalis;0.866290054050016;  
AODON638-20;Odonata;Sympetrum striolatum;Sympetrum striolatum;1;NA;0.99999999999921;  
AODON640-20;Odonata;Aeshna mixta;Aeshna mixta;1;NA;0.99999999999964;  
AODON649-20;Odonata;Chalcolestes parvidens;Chalcolestes viridis;1;Chalcolestes viridis;1;  
AODON662-20;Odonata;Anax ephippiger;Anax ephippiger;1;Anax ephippiger;0.999999741149;  
AODON718-20;Odonata;Nehalennia speciosa;Nehalennia speciosa;1;Nehalennia speciosa;1;  
AODON724-20;Odonata;Sympetrum depressiusculum;NA;0.04;Sympetrum depressiusculum;0.988402550315489;  
AODON730-20;Odonata;Erythromma lindenii;Erythromma lindenii;1;Erythromma lindenii;1;  
AODON769-20;Odonata;Calopteryx splendens;NA;NA;Calopteryx xanthostoma;0.999993033584524;  
AODON771-20;Odonata;Ischnura elegans;NA;0.007;Ischnura saharensis;0.80359616883729;  
AODON772-20;Odonata;Sympetrum sanguineum;Sympetrum sanguineum;1;NA;0.99999999999983;  
AODON773-20;Odonata;Erythromma lindenii;Erythromma lindenii;1;NA;0.99999999999996;  
AODON774-20;Odonata;Enallagma cyathigerum;NA;NA;Enallagma divagans;0.867628863215563;  
AODON777-20;Odonata;Sympetrum meridionale;NA;0.027;NA;0.99999999999979;

AODON778-20;Odonata;Sympetrum meridionale;NA;0.028;NA;0.99999999999972;  
AODON779-20;Odonata;Chalcolestes parvidens;NA;NA;Chalcolestes parvidens;0.999992146310862;  
AODON780-20;Odonata;Chalcolestes parvidens;NA;NA;Chalcolestes parvidens;0.9999971842049;  
AODON781-20;Odonata;Enallagma cyathigerum;NA;0.107;Enallagma divagans;0.863229484463403;  
AODON783-20;Odonata;Aeshna mixta;Aeshna mixta;1;NA;0.99999999999973;  
AODON784-20;Odonata;Ischnura elegans;NA;NA;NA;0.884406489952367;  
AODON785-20;Odonata;Chalcolestes viridis;NA;NA;Chalcolestes parvidens;0.999997489805845;  
AODON786-20;Odonata;Sympetrum meridionale;NA;0.028;NA;0.99999999999977;  
AODON788-20;Odonata;Aeshna mixta;Aeshna mixta;1;NA;0.99999999999963;  
AODON789-20;Odonata;Sympecma fusca;Sympecma fusca;NA;Sympecma fusca;0.869793225603397;  
AODON790-20;Odonata;Sympecma fusca;Sympecma fusca;NA;Sympecma fusca;0.880207864593633;  
AODON791-20;Odonata;Orthetrum cancellatum;Orthetrum cancellatum;1;Orthetrum cancellatum;0.999999999997186;  
AODON792-20;Odonata;Ischnura elegans;NA;0.005;Ischnura saharensis;0.838882122530983;  
AODON793-20;Odonata;Ischnura elegans;NA;0.007;Ischnura saharensis;0.80359616883729;  
AODON794-20;Odonata;Ischnura elegans;NA;0.008;Ischnura saharensis;0.834683741271555;  
AODON795-20;Odonata;Gomphus vulgatissimus;NA;0.145;Gomphus vulgatissimus;0.999848808426419;  
AODON796-20;Odonata;Gomphus vulgatissimus;NA;0.079;Gomphus vulgatissimus;0.999936725334365;  
AODON797-20;Odonata;Ischnura elegans;NA;0.006;Ischnura elegans;0.99390106331765;  
AODON798-20;Odonata;Ischnura elegans;NA;NA;Ischnura saharensis;0.921503261907959;  
AODON800-20;Odonata;Orthetrum cancellatum;Orthetrum cancellatum;1;Orthetrum cancellatum;0.9999999999959016;  
DTNHM2303-21;Odonata;Erythromma najas;Erythromma najas;1;Erythromma najas;1;  
DTNHM2304-21;Odonata;Enallagma cyathigerum;NA;NA;Enallagma cyathigerum;0.997832073353489;  
DTNHM3572-21;Odonata;Ceriagrion tenellum;Ceriagrion tenellum;1;Ceriagrion tenellum;1;  
DTNHM3711-21;Odonata;Coenagrion puella;NA;NA;NA;1;  
EF176683;Odonata;Erythromma najas;Erythromma najas;1;NA;0.999999999999945;  
EF176684;Odonata;Erythromma najas;Erythromma najas;1;NA;0.99999999999994;  
EF176685;Odonata;Erythromma najas;Erythromma najas;1;NA;0.99999999999995;  
EF176686;Odonata;Erythromma najas;Erythromma najas;1;NA;0.999999999999921;  
EF176687;Odonata;Erythromma najas;Erythromma najas;1;NA;0.99999999999994;  
EF176688;Odonata;Erythromma najas;Erythromma najas;1;NA;0.999999999999945;  
EF176689;Odonata;Erythromma najas;Erythromma najas;1;NA;0.999999999999945;  
EF176690;Odonata;Erythromma najas;Erythromma najas;1;NA;0.999999999999945;  
EF176691;Odonata;Erythromma najas;Erythromma najas;1;NA;0.999999999999926;  
EF176692;Odonata;Erythromma najas;Erythromma najas;1;NA;0.999999999999945;  
EF176693;Odonata;Erythromma najas;Erythromma najas;1;NA;0.999999999999951;  
EF176694;Odonata;Erythromma najas;Erythromma najas;1;NA;0.999999999999946;  
EF176695;Odonata;Erythromma najas;Erythromma najas;1;NA;0.999999999999949;  
EF176696;Odonata;Erythromma najas;Erythromma najas;1;NA;0.999999999999964;  
EF176697;Odonata;Erythromma najas;Erythromma najas;1;NA;0.999999999999945;  
EF176698;Odonata;Erythromma najas;Erythromma najas;1;NA;0.999999999999921;  
EF176699;Odonata;Erythromma najas;Erythromma najas;1;NA;0.999999999999931;  
EF176700;Odonata;Erythromma najas;Erythromma najas;1;NA;0.999999999999926;  
EF176701;Odonata;Erythromma najas;Erythromma najas;1;NA;0.999999999999945;  
EF176702;Odonata;Erythromma najas;Erythromma najas;1;NA;0.999999999999945;  
EF176703;Odonata;Erythromma najas;Erythromma najas;1;NA;0.999999999999949;  
EF176704;Odonata;Erythromma najas;Erythromma najas;1;NA;0.999999999999943;  
EF176705;Odonata;Erythromma najas;Erythromma najas;1;NA;0.999999999999944;  
EF176706;Odonata;Erythromma najas;Erythromma najas;1;NA;0.999999999999945;  
EF176707;Odonata;Erythromma najas;Erythromma najas;1;NA;0.999999999999916;  
EF176708;Odonata;Erythromma najas;Erythromma najas;1;NA;0.999999999999945;  
EF176709;Odonata;Erythromma najas;Erythromma najas;1;NA;0.999999999999945;  
EF176710;Odonata;Erythromma najas;Erythromma najas;1;NA;0.999999999999945;  
EF176711;Odonata;Erythromma najas;Erythromma najas;1;NA;0.999999999999951;  
EF176712;Odonata;Erythromma najas;Erythromma najas;1;NA;0.999999999999949;  
EF176713;Odonata;Erythromma najas;Erythromma najas;1;NA;0.999999999999932;  
EF176714;Odonata;Erythromma najas;Erythromma najas;1;NA;0.999999999999935;  
EF176715;Odonata;Erythromma najas;Erythromma najas;1;NA;0.99999999999994;  
EF176716;Odonata;Erythromma najas;Erythromma najas;1;NA;0.99999999999994;  
EF176717;Odonata;Erythromma najas;Erythromma najas;1;NA;0.999999999999954;  
EF176718;Odonata;Erythromma najas;Erythromma najas;1;NA;0.99999999999994;  
EF176719;Odonata;Erythromma najas;Erythromma najas;1;NA;0.999999999999923;  
EF176720;Odonata;Erythromma najas;Erythromma najas;1;NA;0.99999999999994;  
EF176721;Odonata;Erythromma najas;Erythromma najas;1;NA;0.999999999999941;  
EF176722;Odonata;Erythromma najas;Erythromma najas;1;NA;0.99999999999994;  
EF176723;Odonata;Erythromma najas;Erythromma najas;1;NA;0.999999999999916;  
EF176724;Odonata;Erythromma najas;Erythromma najas;1;NA;0.99999999999994;  
EF176725;Odonata;Erythromma najas;Erythromma najas;1;NA;0.99999999999994;  
EF176726;Odonata;Erythromma najas;Erythromma najas;1;NA;0.999999999999945;  
EF176727;Odonata;Erythromma najas;Erythromma najas;1;NA;0.999999999999945;  
EF176728;Odonata;Erythromma najas;Erythromma najas;1;NA;0.999999999999913;  
EF176729;Odonata;Erythromma najas;Erythromma najas;1;NA;0.999999999999946;  
EF176730;Odonata;Erythromma najas;Erythromma najas;1;NA;0.99999999999994;  
EF176731;Odonata;Erythromma najas;Erythromma najas;1;NA;0.999999999999949;  
EF176732;Odonata;Erythromma najas;Erythromma najas;1;NA;0.999999999999945;  
EF176733;Odonata;Erythromma najas;Erythromma najas;1;NA;0.999999999999945;  
EF176734;Odonata;Erythromma najas;Erythromma najas;1;NA;0.999999999999945;

EF176735;Odonata;Erythromma najas;Erythromma najas;1;NA;0.999999999999945;  
 EF176736;Odonata;Erythromma najas;Erythromma najas;1;NA;0.999999999999945;  
 EF176737;Odonata;Erythromma najas;Erythromma najas;1;NA;0.99999999999994;  
 EF176738;Odonata;Erythromma najas;Erythromma najas;1;NA;0.999999999999945;  
 EF176739;Odonata;Erythromma najas;Erythromma najas;1;NA;0.999999999999914;  
 EF176740;Odonata;Erythromma najas;Erythromma najas;1;NA;0.999999999999945;  
 EF176741;Odonata;Erythromma najas;Erythromma najas;1;NA;0.99999999999994;  
 EF176742;Odonata;Erythromma najas;Erythromma najas;1;NA;0.999999999999936;  
 EF176743;Odonata;Erythromma najas;Erythromma najas;1;NA;0.999999999999964;  
 EF176744;Odonata;Erythromma najas;Erythromma najas;1;NA;0.999999999999926;  
 EF176745;Odonata;Erythromma najas;Erythromma najas;1;NA;0.999999999999966;  
 EF176746;Odonata;Erythromma najas;Erythromma najas;1;NA;0.999999999999913;  
 EF176747;Odonata;Erythromma najas;Erythromma najas;1;NA;0.999999999999945;  
 EF176748;Odonata;Erythromma najas;Erythromma najas;1;NA;0.999999999999927;  
 EF176749;Odonata;Erythromma najas;Erythromma najas;1;NA;0.999999999999949;  
 EF176750;Odonata;Erythromma najas;Erythromma najas;1;NA;0.999999999999926;  
 EF176751;Odonata;Erythromma najas;Erythromma najas;1;NA;0.999999999999961;  
 EF176752;Odonata;Erythromma najas;Erythromma najas;1;NA;0.999999999999931;  
 EF176753;Odonata;Erythromma najas;Erythromma najas;1;NA;0.999999999999917;  
 EF176754;Odonata;Erythromma najas;Erythromma najas;1;NA;0.999999999999945;  
 EF176755;Odonata;Erythromma najas;Erythromma najas;1;NA;0.999999999999945;  
 EF176756;Odonata;Erythromma najas;Erythromma najas;1;NA;0.999999999999949;  
 EF176757;Odonata;Erythromma najas;Erythromma najas;1;NA;0.999999999999926;  
 EF176758;Odonata;Erythromma najas;Erythromma najas;1;NA;0.999999999999947;  
 EF176759;Odonata;Erythromma najas;Erythromma najas;1;NA;0.999999999999945;  
 EF176760;Odonata;Erythromma najas;Erythromma najas;1;NA;0.999999999999927;  
 EF176761;Odonata;Erythromma najas;Erythromma najas;1;NA;0.999999999999975;  
 EF176762;Odonata;Erythromma najas;Erythromma najas;1;NA;0.999999999999945;  
 EF176763;Odonata;Erythromma najas;Erythromma najas;1;NA;0.999999999999993;  
 EF176764;Odonata;Erythromma najas;Erythromma najas;1;NA;0.999999999999914;  
 EF176765;Odonata;Erythromma najas;Erythromma najas;1;NA;0.999999999999914;  
 EF176766;Odonata;Erythromma najas;Erythromma najas;1;NA;0.999999999999925;  
 EF176767;Odonata;Erythromma najas;Erythromma najas;1;NA;0.999999999999993;  
 EF176768;Odonata;Erythromma najas;Erythromma najas;1;NA;0.999999999999993;  
 EF176769;Odonata;Erythromma najas;Erythromma najas;1;NA;0.999999999999993;  
 FBAQU1439-13;Odonata;Orthetrum coerulescens;Orthetrum coerulescens;1;Orthetrum  
 coerulescens;0.999999999999972;  
 FBAQU1440-13;Odonata;Orthetrum coerulescens;Orthetrum coerulescens;1;Orthetrum  
 coerulescens;0.999999999999972;  
 FBAQU1442-13;Odonata;Orthetrum coerulescens;Orthetrum coerulescens;1;Orthetrum  
 coerulescens;0.999999999999972;  
 FN252223;Odonata;Nehalennia speciosa;Nehalennia speciosa;1;Nehalennia speciosa;1;  
 FN252224;Odonata;Nehalennia speciosa;Nehalennia speciosa;1;Nehalennia speciosa;1;  
 FN252225;Odonata;Nehalennia speciosa;Nehalennia speciosa;1;Nehalennia speciosa;1;  
 FN252227;Odonata;Nehalennia speciosa;Nehalennia speciosa;1;Nehalennia speciosa;1;  
 FN252228;Odonata;Nehalennia speciosa;Nehalennia speciosa;1;Nehalennia speciosa;1;  
 FN252229;Odonata;Nehalennia speciosa;Nehalennia speciosa;1;Nehalennia speciosa;1;  
 FN252230;Odonata;Nehalennia speciosa;Nehalennia speciosa;1;Nehalennia speciosa;1;  
 FN252231;Odonata;Nehalennia speciosa;Nehalennia speciosa;1;Nehalennia speciosa;1;  
 GU682170;Odonata;Sympetrum vulgatum;Sympetrum vulgatum;1;Sympetrum vulgatum;1;  
 GU682171;Odonata;Sympetrum striolatum;Sympetrum striolatum;1;Sympetrum striolatum;1;  
 GU682172;Odonata;Pyrrhosoma nymphula;Pyrrhosoma nymphula;NA;Pyrrhosoma  
 nymphula;0.999999954931696;  
 GU682173;Odonata;Enallagma cyathigerum;NA;0.004;Enallagma cyathigerum;0.995979290328198;  
 GU682174;Odonata;Coenagrion puella;NA;0.202;NA;100.000.000.000.001;  
 GU682175;Odonata;Crocothemis erythraea;Crocothemis erythraea;1;Crocothemis  
 erythraea;0.99999999470333;  
 GU682183;Odonata;Enallagma cyathigerum;NA;0.004;Enallagma cyathigerum;0.995979290328198;  
 GU682191;Odonata;Pyrrhosoma nymphula;Pyrrhosoma nymphula;1;Pyrrhosoma  
 nymphula;0.999999959877244;  
 HM376192;Odonata;Ischnura elegans;NA;0.005;Ischnura elegans;0.998605890857086;  
 HM422047;Odonata;Aeshna affinis;Aeshna affinis;1;Aeshna affinis;1;  
 HM422048;Odonata;Erythromma viridulum;Erythromma viridulum;1;Erythromma viridulum;1;  
 HM422049;Odonata;Ischnura pumilio;Ischnura pumilio;1;Ischnura pumilio;1;  
 HM422050;Odonata;Orthetrum brunneum;NA;NA;Orthetrum brunneum;0.999688674707389;  
 HM422051;Odonata;Orthetrum coerulescens;Orthetrum coerulescens;1;Orthetrum  
 coerulescens;0.999999999999972;  
 HM422052;Odonata;Sympecma fusca;Sympecma fusca;1;Sympecma fusca;1;  
 HM901857;Odonata;Aeshna grandis;Aeshna grandis;1;Aeshna grandis;0.99999261444201;  
 HM901858;Odonata;Aeshna juncea;NA;0.027;Aeshna juncea;0.99992544160736;  
 HM901859;Odonata;Anax imperator;Anax imperator;0.004;NA;0.9999999999996998;  
 HM901860;Odonata;Calopteryx virgo;Calopteryx virgo;1;Calopteryx virgo;1;  
 HM901863;Odonata;Erythromma lindenii;Erythromma lindenii;1;Erythromma lindenii;1;  
 HM901864;Odonata;Erythromma najas;Erythromma najas;1;Erythromma najas;1;  
 HM901865;Odonata;Ischnura elegans;NA;0.027;NA;0.999999999999998;  
 HM901866;Odonata;Ischnura pumilio;Ischnura pumilio;1;Ischnura pumilio;1;  
 HM901867;Odonata;Leucorrhinia dubia;NA;0.043;Leucorrhinia dubia;0.99999970331061;  
 HM901868;Odonata;Leucorrhinia dubia;NA;0.049;Leucorrhinia dubia;0.999999965699772;

HM901869;Odonata;Ladona depressa;Libellula depressa;1;Libellula depressa;1;  
HM901870;Odonata;Libellula quadrimaculata;Libellula quadrimaculata;1;Libellula quadrimaculata;1;  
HM901872;Odonata;Orthetrum cancellatum;Orthetrum cancellatum;1;Orthetrum  
cancellatum;0.99999999999858;  
HM901873;Odonata;Orthetrum coerulescens;Orthetrum coerulescens;1;Orthetrum  
coerulescens;0.99999999999915;  
HM901874;Odonata;Pyrrhosoma nymphula;Pyrrhosoma nymphula;NA;Pyrrhosoma  
nymphula;0.999999758016686;  
HM901875;Odonata;Pyrrhosoma nymphula;Pyrrhosoma nymphula;NA;Pyrrhosoma  
nymphula;0.999999691348696;  
HM901876;Odonata;Pyrrhosoma nymphula;Pyrrhosoma nymphula;NA;Pyrrhosoma  
nymphula;0.999999758016686;  
HM901877;Odonata;Sympecma fusca;Sympecma fusca;NA;Sympecma fusca;1;  
HM901878;Odonata;Sympetrum danae;Sympetrum danae;1;Sympetrum danae;0.99999999999972;  
HM901879;Odonata;Sympetrum fonscolombii;Sympetrum fonscolombii;1;Sympetrum fonscolombii;1;  
HM901880;Odonata;Sympetrum sanguineum;Sympetrum sanguineum;1;Sympetrum sanguineum;1;  
HM901881;Odonata;Sympetrum striolatum;Sympetrum striolatum;1;Sympetrum striolatum;1;  
HM901882;Odonata;Sympetrum vulgatum;Sympetrum vulgatum;1;Sympetrum vulgatum;1;  
HM901883;Odonata;Aeshna juncea;Aeshna subarctica;1;Aeshna subarctica;0.99997977917858;  
HM901884;Odonata;Aeshna mixta;Aeshna mixta;1;Aeshna mixta;0.99999999993037;  
HM901885;Odonata;Calopteryx virgo;Calopteryx virgo;1;Calopteryx virgo;1;  
HM901887;Odonata;Coenagrion puella;NA;0.198;NA;100.000.000.000.001;  
HM901891;Odonata;Ischnura elegans;NA;0.043;Ischnura elegans;0.710738556423719;  
HM901892;Odonata;Ischnura elegans;NA;NA;100.000.000.000.001;  
HM901893;Odonata;Ischnura pumilio;Ischnura pumilio;1;Ischnura pumilio;1;  
HM901894;Odonata;Ischnura pumilio;Ischnura pumilio;1;Ischnura pumilio;1;  
HM901895;Odonata;Nehalennia speciosa;Nehalennia speciosa;1;Nehalennia speciosa;1;  
HM901899;Odonata;Pyrrhosoma nymphula;Pyrrhosoma nymphula;NA;Pyrrhosoma  
nymphula;0.999999758016686;  
HM901900;Odonata;Somatochlora flavomaculata;Somatochlora flavomaculata;1;Somatochlora  
flavomaculata;0.99999999999972;  
HM901901;Odonata;Sympetrum fonscolombii;Sympetrum fonscolombii;1;Sympetrum fonscolombii;1;  
HM901902;Odonata;Sympetrum pedemontanum;Sympetrum pedemontanum;1;Sympetrum pedemontanum;1;  
HM901903;Odonata;Sympetrum vulgatum;Sympetrum vulgatum;1;Sympetrum vulgatum;1;  
HQ563103;Odonata;Enallagma cyathigerum;NA;0.001;Enallagma cyathigerum;0.997620636260954;  
HQ563104;Odonata;Ischnura elegans;NA;0.011;Ischnura elegans;0.998617436138977;  
HQ563105;Odonata;Enallagma cyathigerum;NA;0.282;Enallagma cyathigerum;0.999669082064827;  
HQ563106;Odonata;Gomphus vulgatissimus;Gomphus vulgatissimus;0.001;Gomphus  
vulgatissimus;0.9999996732725458;  
KC912199;Odonata;Aeshna cyanea;NA;0.305;Aeshna cyanea;0.998667763215364;  
KC912200;Odonata;Aeshna cyanea;NA;0.305;Aeshna cyanea;0.998667763215364;  
KC912201;Odonata;Aeshna cyanea;NA;0.305;Aeshna cyanea;0.998667763215364;  
KC912202;Odonata;Aeshna cyanea;NA;0.305;Aeshna cyanea;0.998667763215364;  
KC912203;Odonata;Aeshna grandis;Aeshna grandis;1;Aeshna grandis;0.999994000994892;  
KC912204;Odonata;Aeshna mixta;Aeshna mixta;1;Aeshna mixta;0.99999999987892;  
KC912205;Odonata;Aeshna mixta;Aeshna mixta;1;Aeshna mixta;0.99999999994884;  
KC912235;Odonata;Brachytron pratense;Brachytron pratense;1;Brachytron  
pratense;0.999999999995111;  
KC912236;Odonata;Brachytron pratense;Brachytron pratense;1;Brachytron  
pratense;0.999999999995111;  
KC912263;Odonata;Orthetrum coerulescens;Orthetrum coerulescens;1;Orthetrum  
coerulescens;0.999999999999488;  
KC912264;Odonata;Orthetrum coerulescens;Orthetrum coerulescens;1;Orthetrum  
coerulescens;0.999999999999488;  
KC912265;Odonata;Orthetrum coerulescens;Orthetrum coerulescens;1;Orthetrum  
coerulescens;0.999999999999488;  
KC912266;Odonata;Orthetrum coerulescens;Orthetrum coerulescens;1;Orthetrum  
coerulescens;0.999999999999545;  
KC912267;Odonata;Orthetrum coerulescens;Orthetrum coerulescens;1;Orthetrum  
coerulescens;0.999999999999545;  
KC912268;Odonata;Orthetrum coerulescens;Orthetrum coerulescens;1;Orthetrum  
coerulescens;0.999999999999545;  
KC912269;Odonata;Orthetrum coerulescens;Orthetrum coerulescens;1;Orthetrum  
coerulescens;0.999999999999545;  
KC912270;Odonata;Orthetrum coerulescens;Orthetrum coerulescens;1;Orthetrum  
coerulescens;0.999999999999545;  
KC912271;Odonata;Orthetrum coerulescens;Orthetrum coerulescens;1;Orthetrum  
coerulescens;0.999999999999545;  
KC912305;Odonata;Ceriagrion tenellum;Ceriagrion tenellum;1;Ceriagrion tenellum;1;  
KC912306;Odonata;Ceriagrion tenellum;Ceriagrion tenellum;1;Ceriagrion tenellum;1;  
KC912307;Odonata;Ceriagrion tenellum;Ceriagrion tenellum;1;Ceriagrion tenellum;1;  
KC912308;Odonata;Ceriagrion tenellum;Ceriagrion tenellum;1;Ceriagrion tenellum;1;  
KC912309;Odonata;Ceriagrion tenellum;Ceriagrion tenellum;1;Ceriagrion tenellum;1;  
KC912310;Odonata;Enallagma cyathigerum;NA;0.022;Enallagma cyathigerum;0.996000915957164;  
KC912311;Odonata;Enallagma cyathigerum;NA;0.022;Enallagma cyathigerum;0.996000915957164;  
KC912312;Odonata;Enallagma cyathigerum;NA;0.264;Enallagma cyathigerum;0.998293681963478;  
KC912313;Odonata;Enallagma cyathigerum;NA;0.022;Enallagma cyathigerum;0.996000915957164;  
KC912314;Odonata;Enallagma cyathigerum;NA;0.022;Enallagma cyathigerum;0.996000915957164;

KF369278;Odonata;Aeshna juncea;NA;0.133;Aeshna juncea;0.999718764003682;  
KF369415;Odonata;Ischnura elegans;NA;0.039;Ischnura elegans;0.998948833724917;  
KF369498;Odonata;Platycnemis pennipes;Platycnemis pennipes;1;Platycnemis pennipes;1;  
KF369553;Odonata;Sympecma fusca;Sympecma fusca;1;Sympecma fusca;1;  
KF584974;Odonata;Anax imperator;Anax imperator;0.003;Anax imperator;0.874869332925071;  
KU180297;Odonata;Aeshna juncea;NA;0.077;Aeshna juncea;0.999908746940724;  
KU180298;Odonata;Aeshna subarctica;Aeshna subarctica;1;Aeshna subarctica;0.999902810949535;  
KU180299;Odonata;Aeshna grandis;Aeshna grandis;1;Aeshna grandis;0.99986338845971;  
KU180304;Odonata;Aeshna cyanea;NA;0.209;Aeshna cyanea;0.999972462886497;  
KU180305;Odonata;Aeshna cyanea;NA;0.342;Aeshna cyanea;0.999969324675679;  
KU180306;Odonata;Aeshna cyanea;NA;0.209;Aeshna cyanea;0.999972462886497;  
KU180307;Odonata;Aeshna cyanea;NA;0.068;Aeshna cyanea;0.999984899945681;  
KU180308;Odonata;Aeshna cyanea;NA;0.204;Aeshna cyanea;0.999979074371436;  
KU180309;Odonata;Aeshna cyanea;Aeshna cyanea;0.022;Aeshna cyanea;0.999991850840112;  
KU180312;Odonata;Aeshna cyanea;Aeshna cyanea;1;Aeshna cyanea;0.999845704722982;  
KU180313;Odonata;Aeshna cyanea;Aeshna cyanea;1;Aeshna cyanea;0.999845704722982;  
KU180317;Odonata;Aeshna cyanea;Aeshna cyanea;1;Aeshna cyanea;0.999845704722982;  
KU180318;Odonata;Aeshna cyanea;Aeshna cyanea;1;Aeshna cyanea;0.999960286714331;  
KU220874;Odonata;Pyrrhosoma nymphula;Pyrrhosoma nymphula;NA;Pyrrhosoma nymphula;0.999999224664537;  
KU220878;Odonata;Pyrrhosoma nymphula;Pyrrhosoma nymphula;1;Pyrrhosoma nymphula;0.999995617358306;  
KU220879;Odonata;Pyrrhosoma nymphula;Pyrrhosoma nymphula;1;Pyrrhosoma nymphula;0.999999085149617;  
KU220880;Odonata;Pyrrhosoma nymphula;Pyrrhosoma nymphula;NA;Pyrrhosoma nymphula;0.99999120497406;  
KU220881;Odonata;Pyrrhosoma nymphula;Pyrrhosoma nymphula;NA;Pyrrhosoma nymphula;0.999997628105631;  
KU220884;Odonata;Pyrrhosoma nymphula;Pyrrhosoma nymphula;1;Pyrrhosoma nymphula;0.999997702078869;  
KU220885;Odonata;Pyrrhosoma nymphula;Pyrrhosoma nymphula;1;Pyrrhosoma nymphula;0.999999152551613;  
KU695838;Odonata;Coenagrion puella;NA;0.221;NA;0.999999999999999;  
KU695839;Odonata;Coenagrion puella;NA;NA;Coenagrion puella;0.789394090613565;  
KU695840;Odonata;Coenagrion puella;NA;0.064;NA;0.999999999999988;  
KU695841;Odonata;Coenagrion puella;NA;0.064;NA;0.999999999999988;  
KU695842;Odonata;Coenagrion puella;NA;0.221;NA;0.999999999999999;  
KU695843;Odonata;Coenagrion puella;NA;0.221;NA;0.999999999999999;  
KU695844;Odonata;Coenagrion puella;NA;0.221;NA;0.999999999999999;  
KU695845;Odonata;Coenagrion puella;NA;0.221;NA;0.999999999999999;  
KX241516;Odonata;Lindenia tetraphylla;Lindenia tetraphylla;NA;Lindenia tetraphylla;1;  
KY847550;Odonata;Brachytron pratense;Brachytron pratense;1;NA;0.999999999993307;  
KY847551;Odonata;Brachytron pratense;Brachytron pratense;1;NA;0.999999999993307;  
KY847569;Odonata;Aeshna mixta;Aeshna mixta;0.002;NA;0.99999999994775;  
KY847570;Odonata;Aeshna mixta;Aeshna mixta;0.001;NA;0.99999999994571;  
KY847574;Odonata;Aeshna cyanea;NA;0.658;NA;0.99999999996884;  
KY847575;Odonata;Aeshna cyanea;NA;0.658;NA;0.99999999996884;  
KY847576;Odonata;Aeshna cyanea;NA;0.658;NA;0.99999999996884;  
KY847577;Odonata;Aeshna cyanea;NA;0.658;NA;0.99999999996884;  
KY847578;Odonata;Aeshna grandis;Aeshna grandis;0.999;NA;0.99999999996648;  
LT634113;Odonata;Sympetrum vulgatum;Sympetrum vulgatum;1;Sympetrum vulgatum;1;  
LT634114;Odonata;Sympetrum vulgatum;Sympetrum vulgatum;1;Sympetrum vulgatum;1;  
LT634115;Odonata;Sympetrum vulgatum;Sympetrum vulgatum;1;Sympetrum vulgatum;1;  
LT634116;Odonata;Sympetrum vulgatum;Sympetrum vulgatum;1;Sympetrum vulgatum;1;  
LT634117;Odonata;Sympetrum vulgatum;Sympetrum vulgatum;1;Sympetrum vulgatum;1;  
LT634118;Odonata;Sympetrum vulgatum;Sympetrum vulgatum;1;Sympetrum vulgatum;1;  
LT634119;Odonata;Sympetrum vulgatum;Sympetrum vulgatum;1;Sympetrum vulgatum;1;  
LT634120;Odonata;Sympetrum vulgatum;Sympetrum vulgatum;1;Sympetrum vulgatum;1;  
LT634121;Odonata;Sympetrum vulgatum;Sympetrum vulgatum;1;Sympetrum vulgatum;1;  
LT634122;Odonata;Sympetrum vulgatum;Sympetrum vulgatum;1;Sympetrum vulgatum;1;  
LT634123;Odonata;Sympetrum vulgatum;Sympetrum vulgatum;1;Sympetrum vulgatum;1;  
LT634124;Odonata;Sympetrum vulgatum;Sympetrum vulgatum;1;Sympetrum vulgatum;1;  
MF458702;Odonata;Erythromma lindenii;Erythromma lindenii;1;Erythromma lindenii;1;  
MF458738;Odonata;Ischnura elegans;NA;0.333;Ischnura elegans;0.9934903859442;  
MH449982;Odonata;Ischnura elegans;NA;0.004;Ischnura elegans;0.994853285902338;  
MH449985;Odonata;Ischnura pumilio;Ischnura pumilio;1;Ischnura pumilio;1;  
MH449990;Odonata;Coenagrion puella;NA;0.078;NA;0.999999999999987;  
MN345616;Odonata;Erythromma najas;Erythromma najas;1;Erythromma najas;1;  
MN454844;Odonata;Aeshna cyanea;NA;0.247;Aeshna cyanea;0.999979122148155;  
MN701478;Odonata;Ischnura genei;NA;NA;Ischnura elegans;0.991061958688637;  
MN701479;Odonata;Sympetrum fonscolombii;Sympetrum fonscolombii;1;Sympetrum fonscolombii;1;  
MN701480;Odonata;Sympetrum fonscolombii;Sympetrum fonscolombii;1;Sympetrum fonscolombii;1;  
MN701481;Odonata;Ischnura genei;NA;NA;Ischnura elegans;0.982005307265847;  
MN701482;Odonata;Ischnura genei;NA;0.024;Ischnura elegans;0.984263383906237;  
MN701483;Odonata;Anax imperator;NA;NA;Anax parthenope;0.91291118983005;  
MN701484;Odonata;Orthetrum coerulescens;Orthetrum coerulescens;1;Orthetrum coerulescens;0.99999999999915;  
MN701485;Odonata;Sympetrum fonscolombii;Sympetrum fonscolombii;1;Sympetrum fonscolombii;1;

MN701486;Odonata;Ischnura genei;NA;NA;Ischnura elegans;0.988983014797997;  
MN701487;Odonata;Ischnura genei;NA;NA;Ischnura elegans;0.979918923470401;  
MN701488;Odonata;Sympetrum fonscolombii;Sympetrum fonscolombii;1;Sympetrum fonscolombii;1;  
MN701489;Odonata;Crocothemis erythraea;Crocothemis erythraea;1;Crocothemis erythraea;0.999999945630238;  
MN701490;Odonata;Anax imperator;NA;0.001;NA;0.999999999999998;  
MN701491;Odonata;Ischnura genei;NA;NA;Ischnura elegans;0.984462212987246;  
MN701492;Odonata;Ischnura genei;NA;0.011;Ischnura elegans;0.9925445918123;  
MN701493;Odonata;Ischnura genei;NA;NA;Ischnura elegans;0.984575316605966;  
MN701494;Odonata;Orthetrum cancellatum;Orthetrum cancellatum;1;Orthetrum cancellatum;0.9999999999997783;  
MN701495;Odonata;Sympetrum fonscolombii;Sympetrum fonscolombii;1;Sympetrum fonscolombii;1;  
MN701496;Odonata;Ischnura genei;NA;0.029;Ischnura elegans;0.995239010886555;  
MN701497;Odonata;Anax imperator;NA;NA;Anax parthenope;0.908489022836932;  
MN701498;Odonata;Anax imperator;NA;NA;Anax parthenope;0.732694020524563;  
MN701499;Odonata;Ischnura genei;NA;0.009;Ischnura elegans;0.899281430828684;  
MN701500;Odonata;Ischnura genei;NA;0.045;Ischnura elegans;0.989975337470439;  
MN701501;Odonata;Anax parthenope;NA;0.039;Anax parthenope;0.990698352270683;  
MN701502;Odonata;Ischnura genei;NA;0.024;Ischnura elegans;0.995573269523333;  
MN701503;Odonata;Sympetrum fonscolombii;Sympetrum fonscolombii;1;Sympetrum fonscolombii;1;  
MN701504;Odonata;Ischnura genei;NA;0.024;Ischnura elegans;0.995573269523333;  
MN701505;Odonata;Ischnura genei;NA;0.013;Ischnura elegans;0.993024782823948;  
MN701506;Odonata;Anax parthenope;NA;0.039;Anax parthenope;0.990698352270683;  
MN701507;Odonata;Ischnura genei;NA;NA;Ischnura elegans;0.988983014797997;  
MN701508;Odonata;Ischnura genei;NA;NA;Ischnura elegans;0.988983014797997;  
MN701509;Odonata;Anax imperator;NA;0.008;NA;0.999999999999979;  
MN701510;Odonata;Anax imperator;NA;0.002;Anax parthenope;0.742023694486804;  
MN701511;Odonata;Anax imperator;NA;0.009;NA;0.999999999999762;  
MN701512;Odonata;Ischnura genei;NA;0.003;Ischnura elegans;0.964528458481601;  
MN701513;Odonata;Sympetrum fonscolombii;Sympetrum fonscolombii;1;Sympetrum fonscolombii;1;  
MN701514;Odonata;Anax parthenope;NA;0.07;Anax parthenope;0.951181748368389;  
MN701515;Odonata;Crocothemis erythraea;Crocothemis erythraea;1;Crocothemis erythraea;0.99999981322731;  
MN701516;Odonata;Ischnura genei;NA;0.01;Ischnura elegans;0.99270231511946;  
MN701517;Odonata;Ischnura genei;NA;0.011;Ischnura elegans;0.9925445918123;  
MN701518;Odonata;Sympetrum fonscolombii;Sympetrum fonscolombii;1;Sympetrum fonscolombii;1;  
MN701519;Odonata;Ischnura genei;NA;NA;Ischnura elegans;0.980714841747466;  
MN701520;Odonata;Anax imperator;NA;NA;Anax parthenope;0.851909066686548;  
MN701521;Odonata;Ischnura genei;NA;NA;Ischnura elegans;0.978755622158006;  
MN701522;Odonata;Orthetrum trinacria;Orthetrum trinacria;1;Orthetrum trinacria;0.999999999999915;  
MN701523;Odonata;Ischnura genei;NA;0.024;Ischnura elegans;0.995573269523333;  
MN701524;Odonata;Sympetrum fonscolombii;Sympetrum fonscolombii;1;Sympetrum fonscolombii;1;  
MN701525;Odonata;Ischnura genei;NA;0.051;Ischnura elegans;0.992612519338563;  
MN701526;Odonata;Sympetrum fonscolombii;Sympetrum fonscolombii;1;Sympetrum fonscolombii;1;  
MN701527;Odonata;Anax imperator;NA;0.013;NA;0.999999999999762;  
MN701528;Odonata;Anax imperator;NA;NA;Anax parthenope;0.836868354641731;  
MN701529;Odonata;Anax imperator;NA;NA;NA;0.999999999999793;  
MN701530;Odonata;Anax imperator;NA;NA;Anax parthenope;0.866759985860865;  
MN701531;Odonata;Ischnura genei;NA;NA;Ischnura elegans;0.988542224135482;  
MN701532;Odonata;Ischnura genei;NA;NA;Ischnura elegans;0.970206650534282;  
MN701533;Odonata;Crocothemis erythraea;Crocothemis erythraea;1;Crocothemis erythraea;0.9999999195262;  
MN701534;Odonata;Anax ephippiger;Anax ephippiger;1;Anax ephippiger;0.999999999964331;  
MN701535;Odonata;Orthetrum coerulescens;Orthetrum coerulescens;1;Orthetrum coerulescens;0.999999999999943;  
MN701536;Odonata;Anax imperator;NA;NA;Anax parthenope;0.824280640627995;  
MN701537;Odonata;Ischnura genei;NA;NA;Ischnura elegans;0.984575316605966;  
MN701538;Odonata;Anax imperator;NA;0.013;NA;0.999999999999736;  
MN701539;Odonata;Sympetrum fonscolombii;Sympetrum fonscolombii;1;Sympetrum fonscolombii;1;  
MN701540;Odonata;Orthetrum cancellatum;Orthetrum cancellatum;1;Orthetrum cancellatum;0.9999999999997783;  
MN701541;Odonata;Ischnura genei;NA;NA;Ischnura elegans;0.980714841747466;  
MN701542;Odonata;Ischnura genei;NA;NA;Ischnura elegans;0.981882309209247;  
MN701543;Odonata;Ischnura genei;NA;NA;Ischnura elegans;0.967721203529635;  
MN701544;Odonata;Anax imperator;NA;0.001;NA;0.999999999999966;  
MN701545;Odonata;Trithemis annulata;Trithemis annulata;1;Trithemis annulata;1;  
MN701546;Odonata;Orthetrum cancellatum;Orthetrum cancellatum;1;Orthetrum cancellatum;0.9999999999997783;  
MN701547;Odonata;Crocothemis erythraea;Crocothemis erythraea;1;Crocothemis erythraea;0.999999996867501;  
MN701548;Odonata;Anax imperator;NA;0.003;Anax parthenope;0.712637026528008;  
MN701549;Odonata;Anax parthenope;NA;NA;Anax parthenope;0.983571767863814;  
MN701550;Odonata;Sympetrum fonscolombii;Sympetrum fonscolombii;1;Sympetrum fonscolombii;1;  
MN701551;Odonata;Orthetrum coerulescens;Orthetrum coerulescens;1;Orthetrum coerulescens;0.999999999999915;  
MN701552;Odonata;Orthetrum cancellatum;Orthetrum cancellatum;1;Orthetrum cancellatum;0.9999999999997783;



MN701553;Odonata;Anax imperator;NA;NA;NA;0.9999999999999906;  
MN701554;Odonata;Sympetrum fonscolombii;Sympetrum fonscolombii;1;Sympetrum fonscolombii;1;  
MN701555;Odonata;Ischnura genei;NA;NA;Ischnura elegans;0.980714841747466;  
MN701556;Odonata;Anax imperator;NA;0.021;Anax parthenope;0.899692447510971;  
MN701557;Odonata;Trithemis annulata;Trithemis annulata;1;Trithemis annulata;1;  
MN701558;Odonata;Sympetrum fonscolombii;Sympetrum fonscolombii;1;Sympetrum fonscolombii;1;  
MN701559;Odonata;Sympetrum fonscolombii;Sympetrum fonscolombii;1;Sympetrum fonscolombii;1;  
MN701560;Odonata;Ischnura genei;NA;0.01;Ischnura elegans;0.99270231511946;  
MN731356;Odonata;Anax imperator;NA;0.012;NA;0.999999999999977;  
MN731357;Odonata;Anax imperator;NA;0.003;NA;0.999999999999996;  
MN731358;Odonata;Anax imperator;NA;0.005;NA;0.999999999999995;  
MN731359;Odonata;Anax imperator;NA;0.003;NA;0.999999999999976;  
MN731360;Odonata;Anax imperator;NA;NA;Anax parthenope;0.909909416947939;  
MN735552;Odonata;Aeshna caerulea;NA;0.006;Aeshna septentrionalis;0.750259138934517;  
MN735555;Odonata;Aeshna juncea;NA;0.105;Aeshna juncea;0.999668146112937;  
MN735556;Odonata;Aeshna cyanea;NA;0.254;Aeshna cyanea;0.999233588967408;  
MN735557;Odonata;Leucorrhinia dubia;NA;0.032;Leucorrhinia dubia;0.999999864004148;  
MN735558;Odonata;Somatochlora alpestris;Somatochlora alpestris;1;Somatochlora alpestris;0.999854982379145;  
MN735560;Odonata;Somatochlora arctica;Somatochlora arctica;1;Somatochlora arctica;0.999977004409028;  
MN847781;Odonata;Aeshna subarctica;Aeshna subarctica;1;Aeshna subarctica;0.999969568575607;  
MN847782;Odonata;Aeshna subarctica;Aeshna subarctica;NA;0.002;Aeshna subarctica;0.999960285904856;  
MN847783;Odonata;Aeshna subarctica;Aeshna subarctica;1;Aeshna subarctica;0.999961546213885;  
MN847784;Odonata;Aeshna subarctica;Aeshna subarctica;NA;0.002;Aeshna subarctica;0.999960285904856;  
MN847785;Odonata;Aeshna subarctica;Aeshna subarctica;NA;0.002;Aeshna subarctica;0.999960285904856;  
MN847786;Odonata;Aeshna subarctica;Aeshna subarctica;NA;0.002;Aeshna subarctica;0.999967625499776;  
MN847787;Odonata;Aeshna subarctica;Aeshna subarctica;1;Aeshna subarctica;0.999973539160204;  
MN847788;Odonata;Aeshna subarctica;Aeshna subarctica;1;Aeshna subarctica;0.999961546213885;  
MN847789;Odonata;Aeshna subarctica;Aeshna subarctica;NA;0.002;Aeshna subarctica;0.999926601785659;  
MN847790;Odonata;Aeshna subarctica;Aeshna subarctica;NA;0.002;Aeshna subarctica;0.999926601785659;  
MN847791;Odonata;Aeshna subarctica;Aeshna subarctica;1;Aeshna subarctica;0.999961546213885;  
MN847792;Odonata;Aeshna subarctica;Aeshna subarctica;NA;0.002;Aeshna subarctica;0.999960285904856;  
MN847793;Odonata;Aeshna subarctica;Aeshna subarctica;NA;0.002;Aeshna subarctica;0.999960285904856;  
MN847794;Odonata;Aeshna subarctica;Aeshna subarctica;NA;0.002;Aeshna subarctica;0.999960285904856;  
MN847795;Odonata;Aeshna subarctica;Aeshna subarctica;NA;0.002;Aeshna subarctica;0.999960285904856;  
MN847796;Odonata;Aeshna subarctica;Aeshna subarctica;NA;0.002;Aeshna subarctica;0.999960285904856;  
MN847797;Odonata;Sympetrum danae;Sympetrum danae;1;Sympetrum danae;0.999999999999972;  
MN847798;Odonata;Sympetrum danae;Sympetrum danae;1;Sympetrum danae;0.999999999999972;  
MN847799;Odonata;Sympetrum danae;Sympetrum danae;1;Sympetrum danae;0.999999999999972;  
MN847800;Odonata;Sympetrum danae;Sympetrum danae;1;Sympetrum danae;0.999999999999972;  
MN847801;Odonata;Sympetrum danae;Sympetrum danae;1;Sympetrum danae;0.999999999999972;  
MN847802;Odonata;Sympetrum danae;Sympetrum danae;1;Sympetrum danae;0.999999999999972;  
MN847803;Odonata;Sympetrum danae;Sympetrum danae;1;Sympetrum danae;0.999999999999972;  
MN847804;Odonata;Sympetrum danae;Sympetrum danae;1;Sympetrum danae;0.999999999999972;  
MN847805;Odonata;Sympetrum danae;Sympetrum danae;1;Sympetrum danae;0.999999999999972;  
MN847806;Odonata;Sympetrum danae;Sympetrum danae;1;Sympetrum danae;0.999999999999972;  
MN847807;Odonata;Sympetrum danae;Sympetrum danae;1;Sympetrum danae;0.999999999999972;  
MN847808;Odonata;Sympetrum danae;Sympetrum danae;1;Sympetrum danae;0.999999999999972;  
MN847809;Odonata;Sympetrum danae;Sympetrum danae;1;Sympetrum danae;0.999999999999972;  
MN847810;Odonata;Sympetrum danae;Sympetrum danae;1;Sympetrum danae;0.999999999999972;  
MN847811;Odonata;Sympetrum danae;Sympetrum danae;1;Sympetrum danae;0.999999999999972;  
MN847812;Odonata;Sympetrum danae;Sympetrum danae;1;Sympetrum danae;0.999999999999972;  
MN847813;Odonata;Sympetrum danae;Sympetrum danae;1;Sympetrum danae;0.999999999999915;  
MN847814;Odonata;Sympetrum danae;Sympetrum danae;1;Sympetrum danae;0.999999999999972;  
MN847815;Odonata;Sympetrum danae;Sympetrum danae;1;Sympetrum danae;0.999999999999972;  
MN847816;Odonata;Sympetrum danae;Sympetrum danae;1;Sympetrum danae;0.999999999999972;  
MN847817;Odonata;Sympetrum danae;Sympetrum danae;1;Sympetrum danae;0.999999999999972;  
MN847818;Odonata;Libellula quadrimaculata;Libellula quadrimaculata;1;Libellula quadrimaculata;1;  
MN847819;Odonata;Libellula quadrimaculata;Libellula quadrimaculata;1;Libellula quadrimaculata;1;  
MN847820;Odonata;Libellula quadrimaculata;Libellula quadrimaculata;1;Libellula quadrimaculata;1;  
MN847821;Odonata;Libellula quadrimaculata;Libellula quadrimaculata;1;Libellula quadrimaculata;1;  
MN847822;Odonata;Libellula quadrimaculata;Libellula quadrimaculata;1;Libellula quadrimaculata;1;  
MN847823;Odonata;Libellula quadrimaculata;Libellula quadrimaculata;1;Libellula quadrimaculata;1;  
MN847824;Odonata;Libellula quadrimaculata;Libellula quadrimaculata;1;Libellula quadrimaculata;1;  
MN847825;Odonata;Libellula quadrimaculata;Libellula quadrimaculata;1;Libellula quadrimaculata;1;  
MN847826;Odonata;Libellula quadrimaculata;Libellula quadrimaculata;1;Libellula quadrimaculata;1;  
MN847827;Odonata;Libellula quadrimaculata;Libellula quadrimaculata;1;Libellula quadrimaculata;1;  
MN847828;Odonata;Libellula quadrimaculata;Libellula quadrimaculata;1;Libellula quadrimaculata;1;  
MN847829;Odonata;Libellula quadrimaculata;Libellula quadrimaculata;1;Libellula quadrimaculata;1;  
MN847830;Odonata;Libellula quadrimaculata;Libellula quadrimaculata;1;Libellula quadrimaculata;1;  
MN847831;Odonata;Libellula quadrimaculata;Libellula quadrimaculata;1;Libellula quadrimaculata;1;  
MN847848;Odonata;Aeshna juncea;Aeshna grandis;0.003;Aeshna juncea;0.999991498076372;  
MN847849;Odonata;Aeshna juncea;Aeshna grandis;0.002;Aeshna juncea;0.999991340198485;  
MN847850;Odonata;Aeshna juncea;Aeshna grandis;0.964;Aeshna juncea;0.999992403965111;  
MN847851;Odonata;Aeshna juncea;NA;0.001;Aeshna juncea;0.999971720850337;  
MN847852;Odonata;Aeshna juncea;Aeshna grandis;0.001;Aeshna juncea;0.999993578741265;  
MN847856;Odonata;Aeshna juncea;NA;0.824;Aeshna juncea;0.997883647972645;

MN847857;Odonata;Aeshna juncea;NA;0.001;Aeshna juncea;0.999958835979367;  
MN847859;Odonata;Aeshna juncea;NA;0.006;Aeshna juncea;0.985573045243697;  
MN847861;Odonata;Aeshna juncea;NA;0.011;Aeshna juncea;0.952976846345692;  
MN847862;Odonata;Aeshna juncea;NA;0.056;Aeshna juncea;0.958118685014467;  
MN847863;Odonata;Aeshna juncea;Aeshna juncea;0.005;Aeshna juncea;0.999445063116235;  
MN847864;Odonata;Aeshna juncea;NA;0.028;Aeshna juncea;0.993655266475047;  
MN847866;Odonata;Aeshna juncea;NA;0.024;Aeshna juncea;0.999937379561046;  
MN847867;Odonata;Aeshna juncea;NA;0.01;Aeshna juncea;0.999935327509804;  
MN847868;Odonata;Aeshna juncea;NA;0.009;Aeshna juncea;0.999892989482842;  
MN847869;Odonata;Aeshna juncea;NA;0.021;Aeshna juncea;0.999910792285454;  
MN847870;Odonata;Aeshna juncea;NA;0.024;Aeshna juncea;0.999960137035564;  
MN847871;Odonata;Aeshna juncea;NA;0.007;Aeshna juncea;0.99998063330467;  
MN847872;Odonata;Aeshna juncea;NA;0.013;Aeshna juncea;0.999914179233811;  
MN847873;Odonata;Aeshna juncea;NA;0.024;Aeshna juncea;0.999937379561046;  
MN847874;Odonata;Aeshna juncea;NA;0.024;Aeshna juncea;0.999937379561046;  
MN847875;Odonata;Aeshna juncea;NA;0.021;Aeshna juncea;0.99996130314321;  
MN847876;Odonata;Aeshna juncea;NA;0.024;Aeshna juncea;0.999937379561046;  
MN847877;Odonata;Aeshna juncea;NA;0.007;Aeshna juncea;0.99998063330467;  
MN847878;Odonata;Aeshna juncea;NA;0.013;Aeshna juncea;0.99992335749329;  
MN847879;Odonata;Aeshna juncea;NA;0.024;Aeshna juncea;0.999965797061393;  
MN847880;Odonata;Aeshna juncea;NA;0.026;Aeshna juncea;0.999909534421207;  
MN847881;Odonata;Aeshna juncea;NA;0.001;Aeshna juncea;0.999580542523816;  
MN847882;Odonata;Aeshna juncea;NA;0.011;Aeshna juncea;0.999983171777244;  
MN847883;Odonata;Aeshna juncea;NA;0.015;Aeshna juncea;0.999903325415765;  
MN847884;Odonata;Aeshna juncea;NA;0.024;Aeshna juncea;0.999937379561046;  
MN847885;Odonata;Aeshna juncea;Aeshna grandis;0.031;Aeshna juncea;0.999839797818541;  
MN847886;Odonata;Aeshna juncea;NA;0.024;Aeshna juncea;0.999937379561046;  
MN847887;Odonata;Aeshna juncea;NA;0.024;Aeshna juncea;0.999937379561046;  
MN908651;Odonata;Calopteryx splendens;NA;0.319;Calopteryx splendens;0.902201516099146;  
MN912871;Odonata;Chalcolestes viridis;NA;NA;Chalcolestes viridis;1;  
MN912937;Odonata;Lestes sponsa;Lestes sponsa;1;Lestes sponsa;0.999801401259401;  
MN912966;Odonata;Lestes virens;Lestes virens;1;Lestes virens;1;  
MN912984;Odonata;Lestes virens;Lestes virens;1;Lestes virens;1;  
MN913171;Odonata;Platycnemis pennipes;Platycnemis pennipes;NA;Platycnemis pennipes;1;  
MN934776;Odonata;Enallagma cyathigerum;NA;0.004;Enallagma cyathigerum;0.995692375934099;  
MN939078;Odonata;Aeshna cyanea;NA;0.236;Aeshna cyanea;0.999977400464336;  
MN939079;Odonata;Aeshna cyanea;NA;0.236;Aeshna cyanea;0.999977400464336;  
MN939080;Odonata;Aeshna cyanea;NA;0.236;Aeshna cyanea;0.999977400464336;  
MN939081;Odonata;Aeshna cyanea;NA;0.236;Aeshna cyanea;0.999977400464336;  
MN939082;Odonata;Aeshna cyanea;NA;0.236;Aeshna cyanea;0.999977400464336;  
MN939083;Odonata;Aeshna cyanea;NA;0.236;Aeshna cyanea;0.999977400464336;  
MN939084;Odonata;Aeshna cyanea;NA;0.236;Aeshna cyanea;0.999977400464336;  
MN939085;Odonata;Aeshna cyanea;NA;0.236;Aeshna cyanea;0.999977400464336;  
MN939086;Odonata;Aeshna cyanea;NA;0.236;Aeshna cyanea;0.999977400464336;  
MN939087;Odonata;Aeshna cyanea;NA;0.236;Aeshna cyanea;0.999977400464336;  
MN939088;Odonata;Aeshna cyanea;NA;0.236;Aeshna cyanea;0.999977400464336;  
MN939089;Odonata;Aeshna cyanea;NA;0.319;Aeshna cyanea;0.999972688834056;  
MN939090;Odonata;Aeshna cyanea;NA;0.359;Aeshna cyanea;0.999984829264631;  
MN939091;Odonata;Aeshna cyanea;NA;0.068;Aeshna cyanea;0.999954789420725;  
MN939092;Odonata;Aeshna cyanea;NA;0.086;Aeshna cyanea;0.999941825366373;  
MN939093;Odonata;Aeshna cyanea;NA;0.092;Aeshna cyanea;0.999983965473436;  
MN939165;Odonata;Aeshna mixta;Aeshna mixta;1;Aeshna mixta;0.999999999994088;  
MN957911;Odonata;Orthetrum coerulescens;Orthetrum coerulescens;1;Orthetrum coerulescens;0.999999999999943;  
MN957912;Odonata;Orthetrum coerulescens;Orthetrum coerulescens;1;Orthetrum coerulescens;0.999999999999943;  
MN957913;Odonata;Orthetrum coerulescens;Orthetrum coerulescens;1;Orthetrum coerulescens;0.999999999999943;  
MN957914;Odonata;Orthetrum coerulescens;Orthetrum coerulescens;1;Orthetrum coerulescens;0.999999999999943;  
MN957915;Odonata;Orthetrum coerulescens;Orthetrum coerulescens;1;Orthetrum coerulescens;0.999999999999943;  
MN957916;Odonata;Orthetrum coerulescens;Orthetrum coerulescens;1;Orthetrum coerulescens;0.999999999999943;  
MN957917;Odonata;Orthetrum coerulescens;Orthetrum coerulescens;1;Orthetrum coerulescens;0.999999999999943;  
MN957918;Odonata;Orthetrum coerulescens;Orthetrum coerulescens;1;Orthetrum coerulescens;0.999999999999943;  
MN957919;Odonata;Orthetrum coerulescens;Orthetrum coerulescens;1;Orthetrum coerulescens;0.999999999999886;  
MN957920;Odonata;Orthetrum coerulescens;Orthetrum coerulescens;1;Orthetrum coerulescens;0.999999999999886;  
MN957921;Odonata;Orthetrum coerulescens;Orthetrum coerulescens;1;Orthetrum coerulescens;0.999999999999886;  
MN957922;Odonata;Orthetrum coerulescens;Orthetrum coerulescens;1;Orthetrum coerulescens;0.999999999999886;  
MN957923;Odonata;Orthetrum coerulescens;Orthetrum coerulescens;1;Orthetrum coerulescens;0.999999999999972;

[illegible]

MN959429;Odonata;Orthetrum cancellatum;Orthetrum cancellatum;1;Orthetrum cancellatum;0.99999999992013;  
MN959430;Odonata;Orthetrum cancellatum;Orthetrum cancellatum;1;Orthetrum cancellatum;0.99999999992013;  
MN959431;Odonata;Orthetrum cancellatum;Orthetrum cancellatum;1;Orthetrum cancellatum;0.99999999999034;  
MN959432;Odonata;Orthetrum cancellatum;Orthetrum cancellatum;1;Orthetrum cancellatum;0.99999999999034;  
MN959433;Odonata;Orthetrum cancellatum;Orthetrum cancellatum;1;Orthetrum cancellatum;0.99999999999034;  
MN959434;Odonata;Orthetrum cancellatum;Orthetrum cancellatum;1;Orthetrum cancellatum;0.99999999999034;  
MN959435;Odonata;Orthetrum cancellatum;Orthetrum cancellatum;1;Orthetrum cancellatum;0.99999999999034;  
MN959436;Odonata;Orthetrum cancellatum;Orthetrum cancellatum;1;Orthetrum cancellatum;0.99999999999233;  
MN959437;Odonata;Orthetrum cancellatum;Orthetrum cancellatum;1;Orthetrum cancellatum;0.99999999996845;  
MN959438;Odonata;Orthetrum cancellatum;Orthetrum cancellatum;1;Orthetrum cancellatum;0.99999999996845;  
MN959439;Odonata;Orthetrum cancellatum;Orthetrum cancellatum;1;Orthetrum cancellatum;0.99999999999005;  
MN959440;Odonata;Orthetrum cancellatum;Orthetrum cancellatum;1;Orthetrum cancellatum;0.99999999999005;  
MN959441;Odonata;Orthetrum cancellatum;Orthetrum cancellatum;1;Orthetrum cancellatum;0.99999999999005;  
MN959442;Odonata;Orthetrum cancellatum;Orthetrum cancellatum;1;Orthetrum cancellatum;0.99999999999005;  
MN959443;Odonata;Orthetrum cancellatum;Orthetrum cancellatum;1;Orthetrum cancellatum;0.99999999999005;  
MN959444;Odonata;Orthetrum cancellatum;Orthetrum cancellatum;1;Orthetrum cancellatum;0.99999999999005;  
MN959445;Odonata;Orthetrum cancellatum;Orthetrum cancellatum;1;Orthetrum cancellatum;0.99999999999005;  
MN959446;Odonata;Orthetrum cancellatum;Orthetrum cancellatum;1;Orthetrum cancellatum;0.99999999998806;  
MN959447;Odonata;Orthetrum cancellatum;Orthetrum cancellatum;1;Orthetrum cancellatum;0.99999999996618;  
MN959448;Odonata;Orthetrum cancellatum;Orthetrum cancellatum;1;Orthetrum cancellatum;0.99999999999517;  
MN959449;Odonata;Orthetrum cancellatum;Orthetrum cancellatum;1;Orthetrum cancellatum;0.9999999999892;  
MN983220;Odonata;Sympecma fusca;Sympecma fusca;NA;Sympecma fusca;1;  
MT001428;Odonata;Aeshna mixta;Aeshna mixta;0.997;Aeshna mixta;0.999999996618556;  
MT216286;Odonata;Ischnura elegans;NA;0.093;Ischnura elegans;0.980725946706554;  
MT216287;Odonata;Ischnura elegans;NA;0.077;Ischnura elegans;0.971508044854798;  
MT216288;Odonata;Ischnura elegans;NA;0.024;Ischnura elegans;0.979885281847245;  
MT216289;Odonata;Ischnura elegans;NA;0.096;Ischnura elegans;0.970251908637264;  
MT216290;Odonata;Ischnura elegans;NA;0.063;Ischnura elegans;0.953604145046905;  
MT216291;Odonata;Ischnura elegans;NA;0.077;Ischnura elegans;0.986097452667403;  
MT216292;Odonata;Ischnura elegans;NA;0.439;Ischnura elegans;0.956653753669307;  
MT216293;Odonata;Ischnura elegans;NA;0.066;Ischnura elegans;0.9616316881861;  
MT216294;Odonata;Ischnura elegans;NA;0.098;Ischnura elegans;0.977930348050092;  
MT216295;Odonata;Ischnura elegans;NA;0.112;Ischnura elegans;0.983106285881605;  
MT216296;Odonata;Ischnura elegans;NA;0.063;Ischnura elegans;0.953604145046905;  
MT216297;Odonata;Ischnura elegans;NA;0.077;Ischnura elegans;0.986097452667403;  
MT216298;Odonata;Ischnura elegans;NA;0.073;Ischnura elegans;0.957047287319968;  
MT216299;Odonata;Ischnura elegans;NA;NA;Ischnura elegans;0.991617562150188;  
MT216300;Odonata;Ischnura elegans;NA;NA;Ischnura elegans;0.984957224408539;  
MT298232;Odonata;Aeshna affinis;Aeshna affinis;1;Aeshna affinis;1;  
MT298233;Odonata;Aeshna affinis;Aeshna affinis;1;Aeshna affinis;1;  
MT298234;Odonata;Aeshna affinis;Aeshna affinis;1;Aeshna affinis;1;  
MT298235;Odonata;Aeshna caerulea;NA;0.001;Aeshna septentrionalis;0.905537993855149;  
MT298236;Odonata;Aeshna cyanea;NA;0.236;Aeshna cyanea;0.999977400464336;  
MT298237;Odonata;Aeshna grandis;Aeshna grandis;0.004;Aeshna grandis;0.999987995364855;  
MT298238;Odonata;Aeshna grandis;Aeshna grandis;0.999;Aeshna grandis;0.999986779159769;  
MT298239;Odonata;Aeshna isoceles;Aeshna isoceles;1;Aeshna isoceles;0.99999999999801;  
MT298240;Odonata;Aeshna isoceles;Aeshna isoceles;1;Aeshna isoceles;0.99999999999773;  
MT298241;Odonata;Aeshna isoceles;Aeshna isoceles;1;Aeshna isoceles;0.99999999999631;  
MT298242;Odonata;Aeshna juncea;NA;0.024;Aeshna juncea;0.999960137035564;  
MT298243;Odonata;Aeshna juncea;NA;0.023;Aeshna juncea;0.999978996161505;  
MT298244;Odonata;Aeshna juncea;NA;0.024;Aeshna juncea;0.999937379561046;  
MT298245;Odonata;Aeshna juncea;NA;0.022;Aeshna juncea;0.999914064567518;  
MT298246;Odonata;Aeshna mixta;Aeshna mixta;1;Aeshna mixta;0.999999999994088;  
MT298247;Odonata;Aeshna mixta;Aeshna mixta;1;Aeshna mixta;0.999999999998209;  
MT298248;Odonata;Aeshna mixta;Aeshna mixta;1;Aeshna mixta;0.999999999995964;  
MT298249;Odonata;Aeshna subarctica;NA;0.002;Aeshna subarctica;0.999960285904856;  
MT298250;Odonata;Aeshna subarctica;Aeshna subarctica;1;Aeshna subarctica;0.999961546213885;

MT298251;Odonata;Anax ephippiger;Anax ephippiger;1;Anax ephippiger;0.99999999774218;  
MT298252;Odonata;Anax ephippiger;Anax ephippiger;1;Anax ephippiger;0.99999999877645;  
MT298253;Odonata;Anax imperator;NA;0.011;Anax parthenope;0.703120549552206;  
MT298254;Odonata;Anax imperator;NA;NA;Anax parthenope;0.939048396493539;  
MT298255;Odonata;Anax imperator;NA;0.01;Anax parthenope;0.716043573788374;  
MT298256;Odonata;Anax imperator;NA;0.002;Anax parthenope;0.806952592373366;  
MT298257;Odonata;Anax imperator;NA;0.002;Anax parthenope;0.806952592373366;  
MT298258;Odonata;Anax imperator;NA;0.001;Anax parthenope;0.843763637272376;  
MT298259;Odonata;Anax imperator;NA;0.002;Anax parthenope;0.806952592373366;  
MT298260;Odonata;Anax imperator;NA;0.002;Anax parthenope;0.806952592373366;  
MT298261;Odonata;Anax parthenope;NA;NA;Anax parthenope;0.939048396493539;  
MT298262;Odonata;Anax parthenope;NA;NA;Anax parthenope;0.916023626741614;  
MT298263;Odonata;Anax parthenope;NA;NA;Anax parthenope;0.943414500852239;  
MT298264;Odonata;Anax parthenope;NA;NA;Anax parthenope;0.943414500852239;  
MT298265;Odonata;Boyeria irene;Boyeria irene;1;Boyeria irene;0.99999999999858;  
MT298266;Odonata;Boyeria irene;Boyeria irene;1;Boyeria irene;0.99999999999773;  
MT298267;Odonata;Boyeria irene;Boyeria irene;1;Boyeria irene;0.99999999999858;  
MT298269;Odonata;Brachythemis impartita;Brachythemis impartita;1;Brachythemis impartita;1;  
MT298270;Odonata;Brachythemis impartita;Brachythemis impartita;1;Brachythemis impartita;1;  
MT298271;Odonata;Brachythemis impartita;Brachythemis impartita;1;Brachythemis impartita;1;  
MT298272;Odonata;Brachytron pratense;Brachytron pratense;1;Brachytron  
pratense;0.99999999746905;  
MT298273;Odonata;Brachytron pratense;Brachytron pratense;1;Brachytron  
pratense;0.999999998921197;  
MT298274;Odonata;Brachytron pratense;Brachytron pratense;1;Brachytron  
pratense;0.999999998921197;  
MT298275;Odonata;Brachytron pratense;Brachytron pratense;1;Brachytron  
pratense;0.99999999307505;  
MT298277;Odonata;Calopteryx haemorrhoidalis;Calopteryx haemorrhoidalis;1;Calopteryx  
haemorrhoidalis;1;  
MT298278;Odonata;Calopteryx haemorrhoidalis;Calopteryx haemorrhoidalis;1;Calopteryx  
haemorrhoidalis;1;  
MT298279;Odonata;Calopteryx haemorrhoidalis;Calopteryx haemorrhoidalis;1;Calopteryx  
haemorrhoidalis;1;  
MT298280;Odonata;Calopteryx haemorrhoidalis;Calopteryx haemorrhoidalis;1;Calopteryx  
haemorrhoidalis;1;  
MT298281;Odonata;Calopteryx haemorrhoidalis;Calopteryx haemorrhoidalis;1;Calopteryx  
haemorrhoidalis;1;  
MT298282;Odonata;Calopteryx haemorrhoidalis;Calopteryx haemorrhoidalis;1;Calopteryx  
haemorrhoidalis;1;  
MT298283;Odonata;Calopteryx haemorrhoidalis;Calopteryx haemorrhoidalis;1;Calopteryx  
haemorrhoidalis;1;  
MT298284;Odonata;Calopteryx haemorrhoidalis;Calopteryx haemorrhoidalis;1;Calopteryx  
haemorrhoidalis;1;  
MT298285;Odonata;Calopteryx splendens;NA;0.319;Calopteryx splendens;0.902201516099146;  
MT298286;Odonata;Calopteryx splendens;NA;NA;Calopteryx splendens;0.919869269571248;  
MT298287;Odonata;Calopteryx splendens;NA;0.319;Calopteryx splendens;0.902201516099146;  
MT298288;Odonata;Calopteryx splendens;NA;0.123;Calopteryx splendens;0.947082279087227;  
MT298289;Odonata;Calopteryx splendens;NA;0.319;Calopteryx splendens;0.902201516099146;  
MT298290;Odonata;Calopteryx virgo;Calopteryx virgo;1;Calopteryx virgo;1;  
MT298291;Odonata;Calopteryx virgo;Calopteryx virgo;1;Calopteryx virgo;1;  
MT298292;Odonata;Calopteryx virgo;Calopteryx virgo;1;Calopteryx virgo;1;  
MT298293;Odonata;Calopteryx virgo;Calopteryx virgo;1;Calopteryx virgo;1;  
MT298294;Odonata;Calopteryx virgo;Calopteryx virgo;1;Calopteryx virgo;1;  
MT298295;Odonata;Calopteryx virgo;Calopteryx virgo;1;Calopteryx virgo;1;  
MT298296;Odonata;Calopteryx xanthostoma;NA;0.319;Calopteryx splendens;0.902201516099146;  
MT298297;Odonata;Calopteryx xanthostoma;NA;0.319;Calopteryx splendens;0.902201516099146;  
MT298298;Odonata;Ceriagrion tenellum;Ceriagrion tenellum;1;Ceriagrion tenellum;1;  
MT298299;Odonata;Ceriagrion tenellum;Ceriagrion tenellum;1;Ceriagrion tenellum;1;  
MT298300;Odonata;Ceriagrion tenellum;Ceriagrion tenellum;1;Ceriagrion tenellum;1;  
MT298301;Odonata;Ceriagrion tenellum;Ceriagrion tenellum;1;Ceriagrion tenellum;1;  
MT298302;Odonata;Ceriagrion tenellum;Ceriagrion tenellum;1;Ceriagrion tenellum;1;  
MT298303;Odonata;Ceriagrion tenellum;Ceriagrion tenellum;1;Ceriagrion tenellum;1;  
MT298304;Odonata;Ceriagrion tenellum;Ceriagrion tenellum;1;Ceriagrion tenellum;1;  
MT298308;Odonata;Chalcolestes parvidens;NA;NA;Chalcolestes parvidens;0.99984391161153;  
MT298309;Odonata;Chalcolestes parvidens;NA;NA;Chalcolestes parvidens;0.99984391161153;  
MT298310;Odonata;Chalcolestes parvidens;NA;NA;Chalcolestes parvidens;0.99984391161153;  
MT298311;Odonata;Chalcolestes parvidens;NA;NA;Chalcolestes parvidens;0.99984391161153;  
MT298314;Odonata;Chalcolestes viridis;Chalcolestes viridis;1;Chalcolestes viridis;1;  
MT298315;Odonata;Chalcolestes viridis;Chalcolestes viridis;1;Chalcolestes viridis;1;  
MT298317;Odonata;Chalcolestes viridis;NA;NA;Chalcolestes viridis;1;  
MT298318;Odonata;Chalcolestes viridis;NA;NA;Chalcolestes viridis;1;  
MT298319;Odonata;Chalcolestes viridis;NA;NA;Chalcolestes viridis;1;  
MT298320;Odonata;Chalcolestes viridis;Chalcolestes viridis;1;Chalcolestes viridis;1;  
MT298321;Odonata;Chalcolestes viridis;NA;NA;Chalcolestes viridis;1;  
MT298343;Odonata;Coenagrion puella;NA;0.202;NA;100.000.000.000.001;  
MT298344;Odonata;Coenagrion puella;NA;0.202;NA;100.000.000.000.001;  
MT298345;Odonata;Coenagrion puella;NA;0.202;NA;100.000.000.000.001;

[illegible]

MT298456;Odonata;Erythromma viridulum;Erythromma viridulum;1;Erythromma viridulum;1;  
MT298457;Odonata;Erythromma viridulum;Erythromma viridulum;1;Erythromma viridulum;1;  
MT298458;Odonata;Erythromma viridulum;Erythromma viridulum;1;Erythromma viridulum;1;  
MT298461;Odonata;Gomphus vulgatissimus;Gomphus vulgatissimus;0.038;Gomphus  
vulgatissimus;0.999967746046816;  
MT298462;Odonata;Gomphus vulgatissimus;Gomphus vulgatissimus;0.038;Gomphus  
vulgatissimus;0.999967746046816;  
MT298463;Odonata;Gomphus vulgatissimus;Gomphus vulgatissimus;0.038;Gomphus  
vulgatissimus;0.999967746046816;  
MT298464;Odonata;Ischnura elegans;NA;0.011;Ischnura elegans;0.998617436138977;  
MT298465;Odonata;Ischnura elegans;NA;0.039;Ischnura elegans;0.998948833724917;  
MT298466;Odonata;Ischnura elegans;NA;0.005;Ischnura elegans;0.999334913694071;  
MT298467;Odonata;Ischnura elegans;NA;0.011;Ischnura elegans;0.998617436138977;  
MT298468;Odonata;Ischnura elegans;NA;0.005;Ischnura elegans;0.999334913694071;  
MT298469;Odonata;Ischnura elegans;NA;0.005;Ischnura elegans;0.999334913694071;  
MT298470;Odonata;Ischnura genei;NA;0.001;Ischnura elegans;0.998258473292383;  
MT298471;Odonata;Ischnura genei;NA;0.001;Ischnura elegans;0.997331423370817;  
MT298472;Odonata;Ischnura genei;NA;0.013;Ischnura elegans;0.998642462098878;  
MT298473;Odonata;Ischnura pumilio;Ischnura pumilio;1;Ischnura pumilio;1;  
MT298474;Odonata;Ischnura pumilio;Ischnura pumilio;1;Ischnura pumilio;1;  
MT298475;Odonata;Ischnura pumilio;Ischnura pumilio;1;Ischnura pumilio;1;  
MT298476;Odonata;Ischnura pumilio;Ischnura pumilio;1;Ischnura pumilio;1;  
MT298492;Odonata;Lestes sponsa;Lestes sponsa;1;Lestes sponsa;0.999791539740177;  
MT298493;Odonata;Lestes sponsa;Lestes sponsa;1;Lestes sponsa;0.999914684976452;  
MT298494;Odonata;Lestes virens;Lestes virens;1;Lestes virens;1;  
MT298495;Odonata;Lestes virens;Lestes virens;1;Lestes virens;1;  
MT298496;Odonata;Lestes virens;Lestes virens;1;Lestes virens;1;  
MT298497;Odonata;Lestes virens;Lestes virens;1;Lestes virens;1;  
MT298498;Odonata;Lestes virens;Lestes virens;1;Lestes virens;1;  
MT298499;Odonata;Lestes virens;Lestes virens;1;Lestes virens;1;  
MT298500;Odonata;Lestes virens;Lestes virens;1;Lestes virens;1;  
MT298501;Odonata;Lestes virens;Lestes virens;1;Lestes virens;1;  
MT298502;Odonata;Leucorrhinia dubia;NA;NA;Leucorrhinia dubia;0.999999805086948;  
MT298503;Odonata;Leucorrhinia dubia;NA;0.013;Leucorrhinia dubia;0.999999814503968;  
MT298504;Odonata;Leucorrhinia dubia;NA;0.013;Leucorrhinia dubia;0.999999814503968;  
MT298505;Odonata;Leucorrhinia dubia;Leucorrhinia dubia;0.005;Leucorrhinia  
dubia;0.999999937945974;  
MT298506;Odonata;Leucorrhinia dubia;NA;0.013;Leucorrhinia dubia;0.999999814503968;  
MT298507;Odonata;Leucorrhinia pectoralis;Leucorrhinia pectoralis;1;Leucorrhinia  
pectoralis;0.999999999995623;  
MT298508;Odonata;Ladona depressa;Libellula depressa;1;Libellula depressa;1;  
MT298517;Odonata;Libellula quadrimaculata;Libellula quadrimaculata;1;Libellula quadrimaculata;1;  
MT298518;Odonata;Libellula quadrimaculata;Libellula quadrimaculata;1;Libellula quadrimaculata;1;  
MT298519;Odonata;Libellula quadrimaculata;Libellula quadrimaculata;1;Libellula quadrimaculata;1;  
MT298520;Odonata;Libellula quadrimaculata;Libellula quadrimaculata;1;Libellula quadrimaculata;1;  
MT298521;Odonata;Libellula quadrimaculata;Libellula quadrimaculata;1;Libellula quadrimaculata;1;  
MT298522;Odonata;Lindenia tetraphylla;Lindenia tetraphylla;NA;Lindenia tetraphylla;1;  
MT298523;Odonata;Lindenia tetraphylla;Lindenia tetraphylla;1;Lindenia tetraphylla;1;  
MT298524;Odonata;Lindenia tetraphylla;Lindenia tetraphylla;NA;Lindenia tetraphylla;1;  
MT298525;Odonata;Lindenia tetraphylla;Lindenia tetraphylla;1;Lindenia tetraphylla;1;  
MT298526;Odonata;Lindenia tetraphylla;Lindenia tetraphylla;NA;Lindenia tetraphylla;1;  
MT298527;Odonata;Lindenia tetraphylla;Lindenia tetraphylla;NA;Lindenia tetraphylla;1;  
MT298528;Odonata;Nehalennia speciosa;Nehalennia speciosa;1;Nehalennia speciosa;1;  
MT298529;Odonata;Nehalennia speciosa;Nehalennia speciosa;1;Nehalennia speciosa;1;  
MT298545;Odonata;Onychogomphus uncatus;NA;NA;Onychogomphus uncatus;1;  
MT298546;Odonata;Onychogomphus uncatus;NA;NA;Onychogomphus uncatus;1;  
MT298547;Odonata;Onychogomphus uncatus;NA;NA;Onychogomphus uncatus;1;  
MT298548;Odonata;Onychogomphus uncatus;NA;NA;Onychogomphus uncatus;1;  
MT298549;Odonata;Ophiogomphus cecilia;Ophiogomphus cecilia;1;Ophiogomphus  
cecilia;0.999999990102282;  
MT298550;Odonata;Orthetrum albistylum;Orthetrum albistylum;1;Orthetrum albistylum;1;  
MT298551;Odonata;Orthetrum albistylum;Orthetrum albistylum;1;Orthetrum albistylum;1;  
MT298552;Odonata;Orthetrum brunneum;NA;0.007;Orthetrum brunneum;0.999877400086097;  
MT298553;Odonata;Orthetrum brunneum;NA;NA;Orthetrum brunneum;0.999813573164937;  
MT298554;Odonata;Orthetrum brunneum;NA;NA;Orthetrum brunneum;0.99982689562523;  
MT298555;Odonata;Orthetrum brunneum;NA;0.006;Orthetrum brunneum;0.999924599571402;  
MT298556;Odonata;Orthetrum brunneum;NA;0.007;Orthetrum brunneum;0.999877400086097;  
MT298557;Odonata;Orthetrum brunneum;NA;0.007;Orthetrum brunneum;0.999877400086097;  
MT298558;Odonata;Orthetrum brunneum;NA;NA;Orthetrum brunneum;0.999813573164937;  
MT298559;Odonata;Orthetrum brunneum;NA;NA;Orthetrum brunneum;0.999688674707389;  
MT298560;Odonata;Orthetrum cancellatum;Orthetrum cancellatum;1;Orthetrum  
cancellatum;0.999999999999801;  
MT298561;Odonata;Orthetrum cancellatum;Orthetrum cancellatum;1;Orthetrum  
cancellatum;0.999999999999517;  
MT298562;Odonata;Orthetrum cancellatum;Orthetrum cancellatum;1;Orthetrum  
cancellatum;0.999999999999034;  
MT298563;Odonata;Orthetrum cancellatum;Orthetrum cancellatum;1;Orthetrum  
cancellatum;0.999999999994759;

MT298564;Odonata;Orthetrum cancellatum;Orthetrum cancellatum;1;Orthetrum  
cancellatum;0.99999999994174;  
MT298565;Odonata;Orthetrum cancellatum;Orthetrum cancellatum;1;Orthetrum  
cancellatum;0.9999999999403;  
MT298566;Odonata;Orthetrum cancellatum;Orthetrum cancellatum;1;Orthetrum  
cancellatum;0.99999999999034;  
MT298567;Odonata;Orthetrum cancellatum;Orthetrum cancellatum;1;Orthetrum  
cancellatum;0.9999999999892;  
MT298568;Odonata;Orthetrum cancellatum;Orthetrum cancellatum;1;Orthetrum  
cancellatum;0.9999999999858;  
MT298570;Odonata;Orthetrum coerulescens;Orthetrum coerulescens;1;Orthetrum  
coerulescens;0.9999999999972;  
MT298571;Odonata;Orthetrum coerulescens;Orthetrum coerulescens;1;Orthetrum  
coerulescens;0.9999999999972;  
MT298572;Odonata;Orthetrum coerulescens;Orthetrum coerulescens;1;Orthetrum  
coerulescens;0.9999999999972;  
MT298573;Odonata;Orthetrum coerulescens;Orthetrum coerulescens;1;Orthetrum  
coerulescens;0.9999999999915;  
MT298574;Odonata;Orthetrum coerulescens;Orthetrum coerulescens;1;Orthetrum  
coerulescens;0.9999999999972;  
MT298575;Odonata;Orthetrum coerulescens;Orthetrum coerulescens;1;Orthetrum  
coerulescens;0.9999999999972;  
MT298576;Odonata;Orthetrum coerulescens;Orthetrum coerulescens;1;Orthetrum  
coerulescens;0.9999999999972;  
MT298577;Odonata;Orthetrum coerulescens;Orthetrum coerulescens;1;Orthetrum  
coerulescens;0.9999999999972;  
MT298578;Odonata;Orthetrum coerulescens;Orthetrum coerulescens;1;Orthetrum  
coerulescens;0.9999999999972;  
MT298579;Odonata;Orthetrum coerulescens;Orthetrum coerulescens;1;Orthetrum coerulescens;1;  
MT298580;Odonata;Orthetrum coerulescens;Orthetrum coerulescens;1;Orthetrum  
coerulescens;0.9999999999972;  
MT298581;Odonata;Orthetrum coerulescens;Orthetrum coerulescens;1;Orthetrum  
coerulescens;0.9999999999972;  
MT298582;Odonata;Orthetrum coerulescens;Orthetrum coerulescens;1;Orthetrum  
coerulescens;0.9999999999972;  
MT298583;Odonata;Orthetrum coerulescens;Orthetrum coerulescens;0.999;Orthetrum  
coerulescens;0.9999999999915;  
MT298584;Odonata;Orthetrum nitidinerve;Orthetrum nitidinerve;1;Orthetrum  
nitidinerve;0.9999999999943;  
MT298585;Odonata;Orthetrum nitidinerve;Orthetrum nitidinerve;1;Orthetrum  
nitidinerve;0.9999999999943;  
MT298586;Odonata;Orthetrum trinacria;Orthetrum trinacria;1;Orthetrum trinacria;1;  
MT298587;Odonata;Orthetrum trinacria;Orthetrum trinacria;1;Orthetrum trinacria;1;  
MT298588;Odonata;Orthetrum trinacria;Orthetrum trinacria;1;Orthetrum trinacria;1;  
MT298591;Odonata;Paragomphus genei;Paragomphus genei;1;Paragomphus genei;1;  
MT298592;Odonata;Paragomphus genei;Paragomphus genei;1;Paragomphus genei;1;  
MT298593;Odonata;Paragomphus genei;Paragomphus genei;1;Paragomphus genei;1;  
MT298594;Odonata;Platycnemis pennipes;Platycnemis pennipes;1;Platycnemis pennipes;1;  
MT298595;Odonata;Platycnemis pennipes;Platycnemis pennipes;1;Platycnemis pennipes;1;  
MT298596;Odonata;Platycnemis pennipes;Platycnemis pennipes;1;Platycnemis pennipes;1;  
MT298597;Odonata;Platycnemis pennipes;Platycnemis pennipes;NA;Platycnemis pennipes;1;  
MT298598;Odonata;Platycnemis pennipes;Platycnemis pennipes;1;Platycnemis pennipes;1;  
MT298599;Odonata;Platycnemis pennipes;Platycnemis pennipes;1;Platycnemis pennipes;1;  
MT298600;Odonata;Platycnemis pennipes;Platycnemis pennipes;1;Platycnemis pennipes;1;  
MT298601;Odonata;Platycnemis pennipes;Platycnemis pennipes;1;Platycnemis pennipes;1;  
MT298602;Odonata;Platycnemis pennipes;Platycnemis pennipes;1;Platycnemis pennipes;1;  
MT298603;Odonata;Pyrrhosoma nymphula;Pyrrhosoma nymphula;NA;Pyrrhosoma  
nymphula;0.999999942969994;  
MT298604;Odonata;Pyrrhosoma nymphula;Pyrrhosoma nymphula;NA;Pyrrhosoma  
nymphula;0.999999942969994;  
MT298605;Odonata;Pyrrhosoma nymphula;Pyrrhosoma elisabethae;0.021;Pyrrhosoma  
nymphula;0.988775488736407;  
MT298606;Odonata;Pyrrhosoma nymphula;Pyrrhosoma nymphula;NA;Pyrrhosoma  
nymphula;0.999999942969994;  
MT298607;Odonata;Selysiothemis nigra;Selysiothemis nigra;1;Selysiothemis nigra;1;  
MT298608;Odonata;Selysiothemis nigra;Selysiothemis nigra;1;Selysiothemis nigra;1;  
MT298609;Odonata;Selysiothemis nigra;Selysiothemis nigra;1;Selysiothemis nigra;1;  
MT298610;Odonata;Somatochlora alpestris;Somatochlora alpestris;1;Somatochlora  
alpestris;0.99926690128508;  
MT298611;Odonata;Somatochlora alpestris;Somatochlora alpestris;1;Somatochlora  
alpestris;0.999501966225456;  
MT298612;Odonata;Somatochlora alpestris;Somatochlora alpestris;1;Somatochlora  
alpestris;0.99926690128508;  
MT298613;Odonata;Somatochlora alpestris;Somatochlora alpestris;1;Somatochlora  
alpestris;0.99926690128508;  
MT298614;Odonata;Somatochlora arctica;Somatochlora arctica;1;Somatochlora  
arctica;0.999828139576534;



MT298615;Odonata;Somatochlora arctica;Somatochlora arctica;1;Somatochlora  
 arctica;0.999917361795353;  
 MT298616;Odonata;Somatochlora flavomaculata;Somatochlora flavomaculata;1;Somatochlora  
 flavomaculata;0.999999999988546;  
 MT298617;Odonata;Somatochlora flavomaculata;Somatochlora flavomaculata;1;Somatochlora  
 flavomaculata;0.999999999988546;  
 MT298618;Odonata;Somatochlora flavomaculata;Somatochlora flavomaculata;1;Somatochlora  
 flavomaculata;0.99999999994799;  
 MT298619;Odonata;Somatochlora flavomaculata;Somatochlora flavomaculata;1;Somatochlora  
 flavomaculata;0.99999999997371;  
 MT298620;Odonata;Somatochlora meridionalis;NA;NA;Somatochlora metallica;0.905356458939651;  
 MT298621;Odonata;Somatochlora meridionalis;NA;NA;Somatochlora metallica;0.992167695014944;  
 MT298622;Odonata;Somatochlora meridionalis;NA;NA;Somatochlora metallica;0.98890840490109;  
 MT298623;Odonata;Somatochlora meridionalis;NA;NA;Somatochlora metallica;0.992167695014944;  
 MT298624;Odonata;Somatochlora meridionalis;NA;NA;Somatochlora metallica;0.97967157409045;  
 MT298625;Odonata;Somatochlora meridionalis;NA;NA;Somatochlora metallica;0.989694224193963;  
 MT298626;Odonata;Somatochlora meridionalis;NA;0.001;Somatochlora metallica;0.984091755629245;  
 MT298627;Odonata;Somatochlora meridionalis;NA;0.001;Somatochlora metallica;0.984091755629245;  
 MT298628;Odonata;Somatochlora meridionalis;NA;0.001;Somatochlora metallica;0.984091755629245;  
 MT298629;Odonata;Somatochlora metallica;NA;NA;Somatochlora metallica;0.995906662875296;  
 MT298630;Odonata;Somatochlora metallica;NA;NA;Somatochlora metallica;0.995906662875296;  
 MT298631;Odonata;Somatochlora metallica;NA;NA;Somatochlora metallica;0.995906662875296;  
 MT298632;Odonata;Somatochlora metallica;NA;NA;Somatochlora metallica;0.997960094491359;  
 MT298633;Odonata;Gomphus flavipes;Stylurus flavipes;1;Stylurus flavipes;0.999999999984993;  
 MT298634;Odonata;Sympecma fusca;Sympecma fusca;NA;Sympecma fusca;1;  
 MT298635;Odonata;Sympecma fusca;Sympecma fusca;NA;Sympecma fusca;1;  
 MT298636;Odonata;Sympecma fusca;Sympecma fusca;NA;Sympecma fusca;1;  
 MT298637;Odonata;Sympecma fusca;Sympecma fusca;1;Sympecma fusca;1;  
 MT298638;Odonata;Sympecma fusca;Sympecma fusca;NA;Sympecma fusca;1;  
 MT298639;Odonata;Sympecma fusca;Sympecma fusca;NA;Sympecma fusca;1;  
 MT298640;Odonata;Sympecma fusca;Sympecma fusca;1;Sympecma fusca;1;  
 MT298641;Odonata;Sympecma paedisca;Sympecma paedisca;1;Sympecma paedisca;1;  
 MT298642;Odonata;Sympetrum danae;Sympetrum danae;1;Sympetrum danae;0.99999999999972;  
 MT298643;Odonata;Sympetrum danae;Sympetrum danae;1;Sympetrum danae;0.99999999999972;  
 MT298644;Odonata;Sympetrum depressiusculum;NA;0.014;Sympetrum depressiusculum;0.997832910323009;  
 MT298645;Odonata;Sympetrum depressiusculum;NA;0.014;Sympetrum depressiusculum;0.997832910323009;  
 MT298646;Odonata;Sympetrum flaveolum;Sympetrum flaveolum;1;Sympetrum flaveolum;1;  
 MT298647;Odonata;Sympetrum flaveolum;Sympetrum flaveolum;1;Sympetrum flaveolum;1;  
 MT298648;Odonata;Sympetrum flaveolum;Sympetrum flaveolum;1;Sympetrum flaveolum;1;  
 MT298649;Odonata;Sympetrum flaveolum;Sympetrum flaveolum;1;Sympetrum flaveolum;1;  
 MT298650;Odonata;Sympetrum fonscolombii;Sympetrum fonscolombii;1;Sympetrum fonscolombii;1;  
 MT298651;Odonata;Sympetrum fonscolombii;Sympetrum fonscolombii;1;Sympetrum fonscolombii;1;  
 MT298652;Odonata;Sympetrum fonscolombii;Sympetrum fonscolombii;1;Sympetrum fonscolombii;1;  
 MT298653;Odonata;Sympetrum fonscolombii;Sympetrum fonscolombii;1;Sympetrum fonscolombii;1;  
 MT298654;Odonata;Sympetrum meridionale;NA;0.027;Sympetrum meridionale;1;  
 MT298655;Odonata;Sympetrum meridionale;NA;0.029;Sympetrum meridionale;1;  
 MT298656;Odonata;Sympetrum meridionale;NA;0.033;Sympetrum meridionale;1;  
 MT298657;Odonata;Sympetrum meridionale;Sympetrum striolatum;0.021;Sympetrum meridionale;1;  
 MT298658;Odonata;Sympetrum pedemontanum;Sympetrum pedemontanum;1;Sympetrum pedemontanum;1;  
 MT298659;Odonata;Sympetrum pedemontanum;Sympetrum pedemontanum;1;Sympetrum pedemontanum;1;  
 MT298660;Odonata;Sympetrum sanguineum;Sympetrum sanguineum;1;Sympetrum sanguineum;1;  
 MT298661;Odonata;Sympetrum sanguineum;Sympetrum sanguineum;1;Sympetrum sanguineum;1;  
 MT298662;Odonata;Sympetrum sanguineum;Sympetrum sanguineum;1;Sympetrum sanguineum;1;  
 MT298663;Odonata;Sympetrum sanguineum;Sympetrum sanguineum;1;Sympetrum sanguineum;1;  
 MT298664;Odonata;Sympetrum sanguineum;Sympetrum sanguineum;1;Sympetrum sanguineum;1;  
 MT298665;Odonata;Sympetrum sanguineum;Sympetrum sanguineum;1;Sympetrum sanguineum;1;  
 MT298666;Odonata;Sympetrum striolatum;Sympetrum striolatum;1;Sympetrum striolatum;1;  
 MT298667;Odonata;Sympetrum striolatum;Sympetrum striolatum;1;Sympetrum striolatum;1;  
 MT298668;Odonata;Sympetrum striolatum;Sympetrum striolatum;1;Sympetrum striolatum;1;  
 MT298669;Odonata;Sympetrum striolatum;Sympetrum striolatum;1;Sympetrum striolatum;1;  
 MT298670;Odonata;Sympetrum striolatum;Sympetrum striolatum;1;Sympetrum striolatum;1;  
 MT298671;Odonata;Sympetrum vulgatum;Sympetrum vulgatum;1;Sympetrum vulgatum;1;  
 MT298672;Odonata;Sympetrum vulgatum;Sympetrum vulgatum;1;Sympetrum vulgatum;1;  
 MT298673;Odonata;Trithemis annulata;Trithemis annulata;1;Trithemis annulata;1;  
 MT298674;Odonata;Trithemis annulata;Trithemis annulata;1;Trithemis annulata;1;  
 MT298675;Odonata;Trithemis annulata;Trithemis annulata;1;Trithemis annulata;1;  
 MT298676;Odonata;Trithemis annulata;Trithemis annulata;1;Trithemis annulata;1;  
 MT298679;Odonata;Zygonyx torridus;Zygonyx torridus;1;Zygonyx torridus;1;  
 MW139673;Odonata;Gomphus flavipes;Stylurus flavipes;1;Stylurus flavipes;0.9999999999844022;  
 MW139674;Odonata;Erythromma viridulum;Erythromma viridulum;1;Erythromma viridulum;1;  
 MW208367;Odonata;Sympecma fusca;Sympecma fusca;NA;Sympecma fusca;0.869793225603397;  
 MW208368;Odonata;Sympecma fusca;Sympecma fusca;NA;Sympecma fusca;0.880207864593633;  
 MW208369;Odonata;Sympecma fusca;Sympecma fusca;1;NA;0.99999999999952;  
 MW208370;Odonata;Chalcolestes viridis;Chalcolestes viridis;1;NA;0.99999999999969;  
 MW208371;Odonata;Chalcolestes viridis;NA;NA;0.99999999999981;  
 MW208372;Odonata;Chalcolestes viridis;Chalcolestes viridis;1;NA;0.99999999999971;  
 MW208373;Odonata;Chalcolestes viridis;NA;NA;Chalcolestes parvidens;0.999992291724291;  
 MW208374;Odonata;Chalcolestes viridis;NA;NA;Chalcolestes parvidens;0.999996039892946;

MW208375;Odonata;Chalcolestes parvidens;NA;NA;Chalcolestes parvidens;0.999973113086404;  
MW208376;Odonata;Chalcolestes parvidens;NA;NA;Chalcolestes parvidens;0.999993756786628;  
MW208377;Odonata;Chalcolestes parvidens;NA;0.02;Chalcolestes parvidens;0.999750589254137;  
MW208378;Odonata;Orthetrum cancellatum;Orthetrum cancellatum;1;Orthetrum  
cancellatum;0.99999999903736;  
MW208379;Odonata;Orthetrum cancellatum;Orthetrum cancellatum;1;Orthetrum  
cancellatum;0.99999999959016;  
MW208380;Odonata;Orthetrum cancellatum;Orthetrum cancellatum;1;NA;0.99999999999991;  
MW208381;Odonata;Sympetrum sanguineum;Sympetrum sanguineum;1;NA;0.99999999999942;  
MW208382;Odonata;Sympetrum sanguineum;Sympetrum sanguineum;1;NA;0.99999999999958;  
MW208383;Odonata;Sympetrum sanguineum;Sympetrum sanguineum;1;NA;0.99999999999974;  
MW208384;Odonata;Sympetrum striolatum;Sympetrum striolatum;1;NA;0.99999999999977;  
MW208385;Odonata;Sympetrum striolatum;Sympetrum striolatum;1;NA;0.99999999999954;  
MW208386;Odonata;Sympetrum meridionale;NA;0.026;NA;0.99999999999983;  
MW208387;Odonata;Sympetrum meridionale;NA;0.026;NA;0.99999999999954;  
MW208388;Odonata;Sympetrum meridionale;NA;0.031;NA;0.99999999999955;  
MW208389;Odonata;Sympetrum meridionale;NA;0.03;NA;0.9999999999998;  
MW208390;Odonata;Sympetrum meridionale;NA;0.036;NA;0.99999999999972;  
MW208391;Odonata;Ischnura elegans;NA;0.007;Ischnura saharensis;0.80359616883729;  
MW208392;Odonata;Ischnura elegans;NA;NA;NA;0.884406489952367;  
MW208393;Odonata;Ischnura elegans;NA;0.005;Ischnura saharensis;0.838882122530983;  
MW208394;Odonata;Ischnura elegans;NA;0.008;Ischnura saharensis;0.834683741271555;  
MW208395;Odonata;Ischnura elegans;NA;0.006;Ischnura elegans;0.99390106331765;  
MW208396;Odonata;Ischnura elegans;NA;NA;Ischnura saharensis;0.921503261907959;  
MW208397;Odonata;Ischnura elegans;NA;0.007;Ischnura saharensis;0.80359616883729;  
MW208398;Odonata;Ischnura elegans;NA;0.007;Ischnura saharensis;0.80359616883729;  
MW208399;Odonata;Ischnura elegans;NA;0.007;Ischnura saharensis;0.80359616883729;  
MW208400;Odonata;Erythromma lindenii;Erythromma lindenii;1;Erythromma lindenii;1;  
MW208401;Odonata;Erythromma lindenii;Erythromma lindenii;1;NA;0.99999999999972;  
MW208402;Odonata;Enallagma cyathigerum;NA;NA;Enallagma divagans;0.867628863215563;  
MW208403;Odonata;Enallagma cyathigerum;NA;0.107;Enallagma divagans;0.863229484463403;  
MW208404;Odonata;Enallagma cyathigerum;NA;0.009;Enallagma divagans;0.773597865179441;  
MW208405;Odonata;Enallagma cyathigerum;NA;0.107;Enallagma divagans;0.863229484463403;  
MW208406;Odonata;Gomphus vulgatissimus;NA;0.145;Gomphus vulgatissimus;0.999848808426419;  
MW208407;Odonata;Gomphus vulgatissimus;NA;0.079;Gomphus vulgatissimus;0.999936725334365;  
MW208408;Odonata;Gomphus vulgatissimus;Gomphus vulgatissimus;0.999;Gomphus  
vulgatissimus;0.90879053777052;  
MW208409;Odonata;Gomphus vulgatissimus;Gomphus vulgatissimus;0.003;Gomphus  
vulgatissimus;0.922146170215716;  
MW208413;Odonata;Calopteryx splendens;NA;0.329;Calopteryx xanthostoma;0.999987167629482;  
MW208414;Odonata;Calopteryx splendens;NA;0.326;Calopteryx xanthostoma;0.999980609407335;  
MW208415;Odonata;Calopteryx splendens;NA;0.326;Calopteryx xanthostoma;0.99998008715648;  
MW208416;Odonata;Aeshna mixta;Aeshna mixta;1;NA;0.99999999999946;  
MW208417;Odonata;Aeshna mixta;Aeshna mixta;1;NA;0.99999999999964;  
MW208418;Odonata;Aeshna mixta;Aeshna mixta;1;NA;0.99999999999982;  
MW208419;Odonata;Aeshna mixta;Aeshna mixta;1;NA;0.99999999999968;  
MW459503;Odonata;Calopteryx virgo;Calopteryx virgo;1;Calopteryx virgo;1;  
MW490083;Odonata;Libellula quadrimaculata;Libellula quadrimaculata;1;Libellula quadrimaculata;1;  
MW490084;Odonata;Sympetrum striolatum;Sympetrum striolatum;1;Sympetrum striolatum;1;  
MW490085;Odonata;Orthetrum brunneum;NA;NA;Orthetrum brunneum;0.999688674707389;  
MW490086;Odonata;Somatochlora flavomaculata;Somatochlora flavomaculata;1;Somatochlora  
flavomaculata;0.999999999894015;  
MW490087;Odonata;Ophiogomphus cecilia;Ophiogomphus cecilia;1;Ophiogomphus  
cecilia;0.999999866747496;  
MW490088;Odonata;Nehalennia speciosa;Nehalennia speciosa;1;Nehalennia speciosa;1;  
MW490089;Odonata;Pyrrhosoma nymphula;NA;NA;Pyrrhosoma nymphula;0.99998837638366;  
MW490090;Odonata;Aeshna subarctica;NA;0.002;Aeshna subarctica;0.999960285904856;  
MW490091;Odonata;Orthetrum cancellatum;Orthetrum cancellatum;1;Orthetrum  
cancellatum;0.99999999996419;  
MW490093;Odonata;Somatochlora metallica;NA;NA;Somatochlora metallica;0.996274692207903;  
MW490096;Odonata;Leucorrhinia pectoralis;Leucorrhinia pectoralis;1;Leucorrhinia  
pectoralis;0.99999999976495;  
MW490099;Odonata;Calopteryx splendens;NA;0.007;NA;0.99999999999986;  
MW490102;Odonata;Gomphus vulgatissimus;Gomphus vulgatissimus;0.032;Gomphus  
vulgatissimus;0.999955196028325;  
MW490104;Odonata;Aeshna juncea;NA;0.053;Aeshna juncea;0.999843647791285;  
MW490105;Odonata;Somatochlora arctica;Somatochlora arctica;1;Somatochlora  
arctica;0.999828139576534;  
MW490106;Odonata;Pyrrhosoma nymphula;Pyrrhosoma nymphula;NA;Pyrrhosoma  
nymphula;0.9999966442661;  
MW490108;Odonata;Lestes sponsa;Lestes sponsa;0.011;Lestes sponsa;0.999907819875605;  
MW490109;Odonata;Aeshna cyanea;NA;0.236;Aeshna cyanea;0.999977400464336;  
MW490110;Odonata;Leucorrhinia dubia;NA;0.007;Leucorrhinia dubia;0.99999848975119;  
MW490111;Odonata;Calopteryx splendens;NA;0.007;NA;0.99999999999986;  
MW490113;Odonata;Ischnura elegans;NA;0.005;Ischnura elegans;0.996947111920569;  
MW490115;Odonata;Ophiogomphus cecilia;Ophiogomphus cecilia;1;Ophiogomphus  
cecilia;0.999999897778684;  
MW490116;Odonata;Erythromma najas;Erythromma najas;1;Erythromma najas;1;

MW490117;Odonata;Enallagma cyathigerum;NA;0.001;Enallagma cyathigerum;0.99730764792338;  
MW490118;Odonata;Enallagma cyathigerum;NA;0.004;Enallagma cyathigerum;0.995692375934099;  
MW490119;Odonata;Sympetrum danae;Sympetrum danae;1;Sympetrum danae;0.999999999999972;  
MW490121;Odonata;Chalcolestes parvidens;NA;0.031;Chalcolestes parvidens;0.999728823362274;  
MW490122;Odonata;Orthetrum brunneum;NA;NA;Orthetrum brunneum;0.999688674707389;  
MW490124;Odonata;Calopteryx splendens;NA;0.245;Calopteryx splendens;0.875583671449949;  
MW490125;Odonata;Anax imperator;NA;0.007;Anax parthenope;0.778304609324695;  
MW490128;Odonata;Sympecma fusca;Sympecma fusca;NA;Sympecma fusca;1;  
MW490129;Odonata;Orthetrum cancellatum;Orthetrum cancellatum;1;Orthetrum cancellatum;0.99999999994759;  
MW490130;Odonata;Aeshna grandis;Aeshna grandis;1;Aeshna grandis;0.999995844820084;  
MW490132;Odonata;Leucorrhinia dubia;NA;0.143;Leucorrhinia dubia;0.99999940174022;  
MW490134;Odonata;Calopteryx splendens;NA;0.319;Calopteryx splendens;0.902201516099146;  
MW490135;Odonata;Ischnura elegans;NA;0.011;Ischnura elegans;0.998617436138977;  
MW490136;Odonata;Enallagma cyathigerum;NA;NA;Enallagma cyathigerum;0.994933985981943;  
MW490138;Odonata;Ischnura elegans;NA;0.001;Ischnura elegans;0.825685246296684;  
MW490140;Odonata;Anax imperator;NA;0.015;Anax parthenope;0.815542951546209;  
MW490142;Odonata;Enallagma cyathigerum;NA;NA;Enallagma cyathigerum;0.99307597319894;  
MW490143;Odonata;Calopteryx splendens;NA;0.235;Calopteryx splendens;0.710507290535721;  
MW490146;Odonata;Somatochlora arctica;Somatochlora arctica;1;Somatochlora arctica;0.999917361795353;  
MW490148;Odonata;Aeshna cyanea;NA;0.125;Aeshna cyanea;0.999995622961422;  
MW490150;Odonata;Sympetrum sanguineum;Sympetrum sanguineum;1;Sympetrum sanguineum;1;  
MW490153;Odonata;Platycnemis pennipes;Platycnemis pennipes;1;Platycnemis pennipes;1;  
MW490155;Odonata;Ophiogomphus cecilia;Ophiogomphus cecilia;1;Ophiogomphus cecilia;0.99999937883816;  
MW490156;Odonata;Erythromma najas;Erythromma najas;1;Erythromma najas;1;  
MW490157;Odonata;Nehalennia speciosa;Nehalennia speciosa;1;Nehalennia speciosa;1;  
MW490162;Odonata;Sympecma paedisca;Sympecma paedisca;1;Sympecma paedisca;1;  
MW490163;Odonata;Libellula quadrimaculata;Libellula quadrimaculata;1;Libellula quadrimaculata;1;  
MW490165;Odonata;Coenagrion puella;NA;0.202;NA;100.000.000.000.001;  
MW490166;Odonata;Enallagma cyathigerum;NA;0.014;Enallagma cyathigerum;0.994708161792147;  
MW490167;Odonata;Enallagma cyathigerum;NA;NA;Enallagma cyathigerum;0.993950182728855;  
MW490168;Odonata;Brachytron pratense;Brachytron pratense;1;Brachytron pratense;0.999999996961009;  
MW490169;Odonata;Ischnura elegans;NA;0.001;Ischnura elegans;0.998258473292383;  
MW490170;Odonata;Libellula quadrimaculata;Libellula quadrimaculata;1;Libellula quadrimaculata;1;  
MW490171;Odonata;Leucorrhinia dubia;NA;0.013;Leucorrhinia dubia;0.999999814503968;  
MW490172;Odonata;Aeshna caerulea;NA;0.014;Aeshna septentrionalis;0.84162475684844;  
MW490174;Odonata;Brachytron pratense;Brachytron pratense;1;Brachytron pratense;0.99999998921197;  
MW490175;Odonata;Orthetrum brunneum;NA;NA;Orthetrum brunneum;0.999688674707389;  
MW490177;Odonata;Leucorrhinia dubia;NA;0.013;Leucorrhinia dubia;0.999999814503968;  
MW490180;Odonata;Platycnemis pennipes;Platycnemis pennipes;1;Platycnemis pennipes;1;  
MW490182;Odonata;Nehalennia speciosa;Nehalennia speciosa;1;Nehalennia speciosa;1;  
MW490185;Odonata;Aeshna mixta;Aeshna mixta;1;Aeshna mixta;0.99999999988802;  
MW490188;Odonata;Aeshna juncea;NA;0.024;Aeshna juncea;0.999937379561046;  
MW490189;Odonata;Gomphus vulgatissimus;Gomphus vulgatissimus;0.002;Gomphus vulgatissimus;0.999992508142936;  
MW490190;Odonata;Enallagma cyathigerum;NA;NA;Enallagma cyathigerum;0.998286688565736;  
MW490193;Odonata;Enallagma cyathigerum;NA;NA;Enallagma cyathigerum;0.99611822348913;  
MW490194;Odonata;Erythromma viridulum;Erythromma viridulum;1;Erythromma viridulum;1;  
MW490195;Odonata;Aeshna subarctica;NA;0.002;Aeshna subarctica;0.999960285904856;  
MW490196;Odonata;Aeshna affinis;Aeshna affinis;1;Aeshna affinis;1;  
MW490197;Odonata;Somatochlora metallica;NA;NA;Somatochlora metallica;0.996274692207903;  
MW490199;Odonata;Calopteryx splendens;NA;0.319;Calopteryx splendens;0.902201516099146;  
MW490201;Odonata;Ophiogomphus cecilia;Ophiogomphus cecilia;1;Ophiogomphus cecilia;0.999999842036841;  
MW490203;Odonata;Calopteryx haemorrhoidalis;Calopteryx haemorrhoidalis;1;Calopteryx haemorrhoidalis;1;  
MW490204;Odonata;Calopteryx splendens;NA;0.002;NA;100.000.000.000.001;  
MW490205;Odonata;Orthetrum brunneum;NA;NA;Orthetrum brunneum;0.999516932189791;  
MW490206;Odonata;Coenagrion puella;NA;0.207;NA;100.000.000.000.001;  
MW490207;Odonata;Lestes sponsa;Lestes sponsa;1;Lestes sponsa;0.999892538599888;  
MW490208;Odonata;Gomphus vulgatissimus;Gomphus vulgatissimus;0.001;Gomphus vulgatissimus;0.999996732725458;  
MW490209;Odonata;Sympetrum striolatum;Sympetrum striolatum;1;Sympetrum striolatum;1;  
MW490211;Odonata;Somatochlora flavomaculata;Somatochlora flavomaculata;1;Somatochlora flavomaculata;0.99999999995225;  
MW490212;Odonata;Brachytron pratense;Brachytron pratense;1;Brachytron pratense;0.99999998921197;  
MW490213;Odonata;Nehalennia speciosa;Nehalennia speciosa;1;Nehalennia speciosa;1;  
MW490214;Odonata;Ischnura elegans;NA;0.001;NA;1;  
MW490215;Odonata;Ischnura elegans;NA;NA;Ischnura elegans;0.995199167553115;  
MW490216;Odonata;Brachytron pratense;Brachytron pratense;1;Brachytron pratense;0.99999998921197;  
MW490218;Odonata;Enallagma cyathigerum;NA;NA;Enallagma cyathigerum;0.99604185295983;  
MW490219;Odonata;Coenagrion puella;NA;0.074;NA;0.999999999999997;

MW490220;Odonata;Sympecma paedisca;Sympecma paedisca;1;Sympecma paedisca;1;  
MW490221;Odonata;Aeshna subarctica;Aeshna subarctica;1;Aeshna subarctica;0.999961546213885;  
MW490223;Odonata;Sympecma paedisca;Sympecma paedisca;1;Sympecma paedisca;1;  
MW490224;Odonata;Gomphus vulgatissimus;Gomphus vulgatissimus;0.968;Gomphus  
vulgatissimus;0.999973592392232;  
MW490225;Odonata;Enallagma cyathigerum;NA;0.004;Enallagma cyathigerum;0.995692375934099;  
MW490226;Odonata;Coenagrion puella;NA;NA;NA;0.999999999999987;  
MW490227;Odonata;Enallagma cyathigerum;NA;0.004;Enallagma cyathigerum;0.995692375934099;  
MW490229;Odonata;Lestes sponsa;Lestes sponsa;0.011;Lestes sponsa;0.999907819875605;  
MW490230;Odonata;Calopteryx splendens;NA;0.396;Calopteryx splendens;0.89896561305908;  
MW490232;Odonata;Aeshna caerulea;NA;0.008;Aeshna septentrionalis;0.900266799752646;  
MW490233;Odonata;Coenagrion puella;NA;0.225;NA;100.000.000.000.001;  
MW490235;Odonata;Sympecma fusca;Sympecma fusca;1;Sympecma fusca;1;  
MW490236;Odonata;Aeshna mixta;Aeshna mixta;1;Aeshna mixta;0.99999999997698;  
MW490237;Odonata;Aeshna isoceles;Aeshna isoceles;1;Aeshna isoceles;0.99999999999773;  
MW490238;Odonata;Orthetrum albistylum;Orthetrum albistylum;1;Orthetrum albistylum;1;  
MW490239;Odonata;Ophiogomphus cecilia;Ophiogomphus cecilia;1;Ophiogomphus  
cecilia;0.99999990102282;  
MW490240;Odonata;Coenagrion pulchellum;NA;NA;NA;1;  
MW490241;Odonata;Gomphus vulgatissimus;Gomphus vulgatissimus;0.038;Gomphus  
vulgatissimus;0.999958376398005;  
MW490243;Odonata;Erythromma viridulum;Erythromma viridulum;1;Erythromma viridulum;1;  
MW490245;Odonata;Aeshna cyanea;NA;0.236;Aeshna cyanea;0.999977400464336;  
MW490246;Odonata;Orthetrum cancellatum;Orthetrum cancellatum;1;Orthetrum  
cancellatum;0.99999999994759;  
MW490247;Odonata;Coenagrion puella;NA;NA;NA;0.999999999999998;  
MW490250;Odonata;Enallagma cyathigerum;NA;0.003;Enallagma cyathigerum;0.9946940221016;  
MW490251;Odonata;Leucorrhinia dubia;NA;0.013;Leucorrhinia dubia;0.999999814503968;  
MW490252;Odonata;Cordulia aenea;Cordulia aenea;1;Cordulia aenea;1;  
MW490254;Odonata;Erythromma najas;Erythromma najas;1;Erythromma najas;1;  
MW490257;Odonata;Sympetrum pedemontanum;Sympetrum pedemontanum;1;Sympetrum pedemontanum;1;  
MW490259;Odonata;Brachytron pratense;Brachytron pratense;1;Brachytron  
pratense;0.99999997621387;  
MW490262;Odonata;Erythromma najas;Erythromma najas;1;Erythromma najas;1;  
MW490263;Odonata;Orthetrum coerulescens;Orthetrum coerulescens;1;Orthetrum  
coerulescens;0.999999999999943;  
MW490264;Odonata;Sympecma fusca;Sympecma fusca;NA;Sympecma fusca;1;  
MW490265;Odonata;Aeshna grandis;Aeshna grandis;1;Aeshna grandis;0.999995844820084;  
MW490266;Odonata;Sympetrum vulgatum;Sympetrum vulgatum;1;Sympetrum vulgatum;1;  
MW490267;Odonata;Sympecma fusca;Sympecma fusca;NA;Sympecma fusca;1;  
MW490268;Odonata;Crocothemis erythraea;Crocothemis erythraea;1;Crocothemis  
erythraea;0.999999994325179;  
MW490269;Odonata;Coenagrion puella;NA;NA;NA;0.999999999999996;  
MW490270;Odonata;Erythromma viridulum;Erythromma viridulum;1;Erythromma viridulum;1;  
MW490271;Odonata;Cordulia aenea;Cordulia amurensis;0.001;Cordulia aenea;0.999149743807553;  
MW490272;Odonata;Aeshna caerulea;NA;0.002;Aeshna septentrionalis;0.917170273581695;  
MW490273;Odonata;Aeshna grandis;Aeshna grandis;1;Aeshna grandis;0.999995844820084;  
MW490274;Odonata;Coenagrion pulchellum;Coenagrion pulchellum;0.991;Coenagrion  
pulchellum;0.779758768225245;  
MW490275;Odonata;Erythromma najas;Erythromma najas;1;Erythromma najas;1;  
MW490276;Odonata;Enallagma cyathigerum;NA;0.002;Enallagma cyathigerum;0.994833046656794;  
MW490277;Odonata;Leucorrhinia dubia;NA;0.288;Leucorrhinia dubia;0.999999846835476;  
MW490278;Odonata;Ophiogomphus cecilia;Ophiogomphus cecilia;1;Ophiogomphus  
cecilia;0.999999853642844;  
MW490279;Odonata;Coenagrion puella;NA;NA;NA;1;  
MW490280;Odonata;Platycnemis pennipes;Platycnemis pennipes;1;Platycnemis pennipes;1;  
MW490283;Odonata;Aeshna caerulea;NA;0.023;Aeshna septentrionalis;0.873405386289973;  
MW490285;Odonata;Orthetrum coerulescens;Orthetrum coerulescens;1;Orthetrum  
coerulescens;0.999999999999972;  
MW490287;Odonata;Erythromma lindenii;Erythromma lindenii;1;Erythromma lindenii;1;  
MW490288;Odonata;Aeshna isoceles;Aeshna isoceles;1;Aeshna isoceles;0.999999999983942;  
MW490289;Odonata;Coenagrion puella;NA;0.202;NA;100.000.000.000.001;  
MW490290;Odonata;Brachytron pratense;Brachytron pratense;1;Brachytron  
pratense;0.99999998921197;  
MW490291;Odonata;Aeshna subarctica;NA;0.002;Aeshna subarctica;0.999960285904856;  
MW490292;Odonata;Orthetrum cancellatum;Orthetrum cancellatum;1;Orthetrum  
cancellatum;0.99999999994759;  
MW490293;Odonata;Orthetrum cancellatum;Orthetrum cancellatum;1;Orthetrum  
cancellatum;0.99999999999403;  
MW490295;Odonata;Lestes sponsa;Lestes sponsa;1;Lestes sponsa;0.999892538599888;  
MW490297;Odonata;Leucorrhinia pectoralis;Leucorrhinia pectoralis;1;Leucorrhinia  
pectoralis;0.999999999995197;  
MW490299;Odonata;Anax imperator;NA;NA;Anax parthenope;0.73157485028281;  
MW490300;Odonata;Enallagma cyathigerum;NA;0.279;Enallagma cyathigerum;0.995466273810319;  
MW490301;Odonata;Enallagma cyathigerum;NA;0.004;Enallagma cyathigerum;0.995692375934099;  
MW490302;Odonata;Ischnura elegans;NA;0.011;Ischnura elegans;0.998617436138977;  
MW490303;Odonata;Leucorrhinia dubia;NA;0.017;Leucorrhinia dubia;0.999999144860876;  
MW490304;Odonata;Erythromma viridulum;Erythromma viridulum;1;Erythromma viridulum;1;

MW490305;Odonata;Aeshna juncea;NA;0.001;Aeshna juncea;0.999942903996069;  
MW490307;Odonata;Coenagrion puella;NA;0.202;NA;100.000.000.000.001;  
MW490308;Odonata;Pyrrhosoma nymphula;Pyrrhosoma nymphula;NA;Pyrrhosoma nymphula;0.999999954931696;  
MW490309;Odonata;Aeshna grandis;Aeshna grandis;0.004;Aeshna grandis;0.999804613529749;  
MW490310;Odonata;Ischnura elegans;NA;0.011;Ischnura elegans;0.998617436138977;  
MW490312;Odonata;Aeshna juncea;NA;0.024;Aeshna juncea;0.999960137035564;  
MW490313;Odonata;Boyeria irene;Boyeria irene;1;Boyeria irene;0.999999999999659;  
MW490314;Odonata;Ischnura elegans;NA;0.011;Ischnura elegans;0.998617436138977;  
MW490317;Odonata;Libellula quadrimaculata;Libellula quadrimaculata;1;Libellula quadrimaculata;1;  
MW490320;Odonata;Ophiogomphus cecilia;Ophiogomphus cecilia;1;Ophiogomphus cecilia;0.999999990102282;  
MW490321;Odonata;Crocothemis erythraea;Crocothemis erythraea;1;Crocothemis erythraea;0.99999999121997;  
MW490323;Odonata;Brachytron pratense;Brachytron pratense;1;Brachytron pratense;0.99999998953882;  
MW490324;Odonata;Calopteryx splendens;NA;NA;Calopteryx splendens;0.869075688587683;  
MW490325;Odonata;Aeshna isocetes;Aeshna isocetes;1;Aeshna isocetes;0.99999999951683;  
MW490326;Odonata;Lestes virens;Lestes virens;1;Lestes virens;1;  
MW490327;Odonata;Crocothemis erythraea;Crocothemis erythraea;1;Crocothemis erythraea;0.99999988232673;  
MW490328;Odonata;Somatochlora arctica;Somatochlora arctica;1;Somatochlora arctica;0.999917361795353;  
MW490329;Odonata;Calopteryx splendens;NA;NA;NA;0.99999999999989;  
MW490330;Odonata;Erythromma najas;Erythromma najas;1;Erythromma najas;1;  
MW490331;Odonata;Cordulia aenea;Cordulia aenea;1;Cordulia aenea;0.99999999999972;  
MW490332;Odonata;Calopteryx splendens;NA;0.319;Calopteryx splendens;0.902201516099146;  
MW490334;Odonata;Sympetrum danae;Sympetrum danae;1;Sympetrum danae;0.99999999999972;  
MW490335;Odonata;Somatochlora metallica;NA;NA;Somatochlora metallica;0.996274692207903;  
MW490336;Odonata;Coenagrion puella;NA;0.202;NA;100.000.000.000.001;  
MW490337;Odonata;Ischnura elegans;NA;NA;Ischnura elegans;0.889339792375842;  
MW490339;Odonata;Pyrrhosoma nymphula;Pyrrhosoma nymphula;NA;Pyrrhosoma nymphula;0.999999916764583;  
MW490340;Odonata;Coenagrion puella;NA;0.072;NA;100.000.000.000.001;  
MW490341;Odonata;Pyrrhosoma nymphula;Pyrrhosoma nymphula;NA;Pyrrhosoma nymphula;0.999999942969994;  
MW490342;Odonata;Erythromma najas;Erythromma najas;1;Erythromma najas;1;  
MW490343;Odonata;Enallagma cyathigerum;NA;0.001;Enallagma cyathigerum;0.994809499647476;  
MW490344;Odonata;Erythromma viridulum;Erythromma viridulum;1;Erythromma viridulum;1;  
MW490345;Odonata;Pyrrhosoma nymphula;Pyrrhosoma nymphula;NA;Pyrrhosoma nymphula;0.999999942969994;  
MW490346;Odonata;Sympecma paedisca;Sympecma paedisca;1;Sympecma paedisca;1;  
MW490347;Odonata;Coenagrion puella;NA;0.129;NA;0.99999999999998;  
MW490349;Odonata;Libellula quadrimaculata;Libellula quadrimaculata;1;Libellula quadrimaculata;1;  
MW490351;Odonata;Platycnemis pennipes;Platycnemis pennipes;1;Platycnemis pennipes;1;  
MW490352;Odonata;Aeshna caerulea;NA;0.002;Aeshna septentrionalis;0.917170273581695;  
MW490353;Odonata;Libellula quadrimaculata;Libellula quadrimaculata;1;Libellula quadrimaculata;1;  
MW490354;Odonata;Enallagma cyathigerum;NA;0.004;Enallagma cyathigerum;0.995692375934099;  
MW490355;Odonata;Aeshna grandis;Aeshna grandis;1;Aeshna grandis;0.99995844820084;  
MW490356;Odonata;Libellula quadrimaculata;Libellula quadrimaculata;1;Libellula quadrimaculata;1;  
MW490357;Odonata;Pyrrhosoma nymphula;Pyrrhosoma nymphula;NA;Pyrrhosoma nymphula;0.999999942969994;  
MW490358;Odonata;Cordulia aenea;Cordulia aenea;1;Cordulia aenea;1;  
MW490359;Odonata;Enallagma cyathigerum;NA;0.205;Enallagma cyathigerum;0.997539102844382;  
MW490360;Odonata;Gomphus vulgatissimus;Gomphus vulgatissimus;0.001;Gomphus vulgatissimus;0.999971241716898;  
MW490364;Odonata;Aeshna cyanea;NA;0.282;Aeshna cyanea;0.999989302169988;  
MW490365;Odonata;Libellula quadrimaculata;Libellula quadrimaculata;1;Libellula quadrimaculata;1;  
MW490366;Odonata;Sympecma paedisca;Sympecma paedisca;1;Sympecma paedisca;1;  
MW490370;Odonata;Aeshna isocetes;Aeshna isocetes;1;Aeshna isocetes;0.999999999989569;  
MW490371;Odonata;Ischnura elegans;NA;0.011;Ischnura elegans;0.998617436138977;  
MW490372;Odonata;Aeshna cyanea;NA;0.076;Aeshna cyanea;0.999982542263032;  
MW490373;Odonata;Pyrrhosoma nymphula;Pyrrhosoma nymphula;NA;Pyrrhosoma nymphula;0.9999998061782;  
MW490374;Odonata;Sympetrum fonscolombii;Sympetrum fonscolombii;1;Sympetrum fonscolombii;1;  
MW490375;Odonata;Aeshna mixta;Aeshna mixta;1;Aeshna mixta;0.99999999994088;  
MW490380;Odonata;Gomphus vulgatissimus;NA;0.135;Gomphus vulgatissimus;0.99964938883091;  
MW490381;Odonata;Coenagrion puella;NA;0.202;NA;100.000.000.000.001;  
MW490382;Odonata;Ischnura elegans;NA;0.004;Ischnura elegans;0.990552355790715;  
MW490384;Odonata;Orthetrum coerulescens;Orthetrum coerulescens;1;Orthetrum coerulescens;0.99999999999972;  
MW490385;Odonata;Enallagma cyathigerum;NA;NA;Enallagma cyathigerum;0.998194777610573;  
MW490386;Odonata;Orthetrum coerulescens;Orthetrum coerulescens;1;Orthetrum coerulescens;0.99999999999801;  
MW490387;Odonata;Sympecma fusca;Sympecma fusca;NA;Sympecma fusca;1;  
MW490388;Odonata;Gomphus vulgatissimus;Gomphus vulgatissimus;0.995;Gomphus vulgatissimus;0.996797039459195;  
MW490389;Odonata;Gomphus vulgatissimus;Gomphus vulgatissimus;0.001;Gomphus vulgatissimus;0.999996732725458;

MW490390;Odonata;Cordulia aenea;Cordulia amurensis;0.001;Cordulia aenea;0.924910129646669;  
MW490392;Odonata;Orthetrum cancellatum;Orthetrum cancellatum;1;Orthetrum  
cancellatum;0.999999999999946;  
MW490393;Odonata;Lestes sponsa;Lestes sponsa;0.001;Lestes sponsa;0.999943054198568;  
MW490394;Odonata;Lestes sponsa;Lestes sponsa;0.011;Lestes sponsa;0.999907819875605;  
MW490396;Odonata;Aeshna juncea;NA;0.001;Aeshna juncea;0.999293641531582;  
MW490397;Odonata;Calopteryx splendens;NA;0.002;NA;100.000.000.000.001;  
MW490398;Odonata;Libellula quadrimaculata;Libellula quadrimaculata;1;Libellula quadrimaculata;1;  
MW490399;Odonata;Aeshna affinis;Aeshna affinis;1;Aeshna affinis;1;  
MW490400;Odonata;Erythromma viridulum;Erythromma viridulum;1;Erythromma viridulum;1;  
MW490401;Odonata;Pyrrhosoma nymphula;Pyrrhosoma nymphula;NA;Pyrrhosoma  
nymphula;0.999999942969994;  
MW490402;Odonata;Ischnura elegans;NA;0.001;Ischnura elegans;0.994423774798887;  
MW490403;Odonata;Aeshna subarctica;Aeshna subarctica;1;Aeshna subarctica;0.999956344291136;  
MW490404;Odonata;Libellula quadrimaculata;Libellula quadrimaculata;1;Libellula quadrimaculata;1;  
MW490405;Odonata;Sympetrum vulgatum;Sympetrum vulgatum;1;Sympetrum vulgatum;1;  
MW490406;Odonata;Coenagrion puella;NA;0.202;NA;100.000.000.000.001;  
MW490407;Odonata;Lestes sponsa;Lestes sponsa;0.999;Lestes sponsa;0.999963032468061;  
MW490408;Odonata;Enallagma cyathigerum;NA;0.004;Enallagma cyathigerum;0.995692375934099;  
MW490409;Odonata;Ischnura elegans;NA;0.002;Ischnura elegans;0.776366780276835;  
MW490411;Odonata;Enallagma cyathigerum;NA;NA;Enallagma cyathigerum;0.998286688565736;  
MW490412;Odonata;Ischnura elegans;NA;0.011;Ischnura elegans;0.998617436138977;  
MW490413;Odonata;Ischnura elegans;NA;0.002;Ischnura elegans;0.995483725922921;  
MW490414;Odonata;Ischnura elegans;NA;0.014;Ischnura elegans;0.99132237148509;  
MW490415;Odonata;Ischnura elegans;NA;0.001;Ischnura elegans;0.998258473292383;  
MW490416;Odonata;Chalcolestes viridis;NA;NA;Chalcolestes viridis;1;  
MW490417;Odonata;Aeshna grandis;Aeshna grandis;0.994;Aeshna grandis;0.999866059977216;  
MW490419;Odonata;Aeshna juncea;Aeshna grandis;0.02;Aeshna juncea;0.99998718242248;  
MW490420;Odonata;Ischnura elegans;NA;0.039;Ischnura elegans;0.998948833724917;  
MW490421;Odonata;Sympecma paedisca;Sympecma paedisca;1;Sympecma paedisca;1;  
MW490423;Odonata;Sympecma paedisca;Sympecma paedisca;1;Sympecma paedisca;1;  
MW490424;Odonata;Cordulia aenea;Cordulia amurensis;0.001;Cordulia aenea;0.919489179849775;  
MW490425;Odonata;Nehalennia speciosa;Nehalennia speciosa;1;Nehalennia speciosa;1;  
MW490426;Odonata;Sympetrum fonscolombii;Sympetrum fonscolombii;1;Sympetrum fonscolombii;1;  
MW490428;Odonata;Calopteryx virgo;Calopteryx virgo;1;Calopteryx virgo;1;  
MW490429;Odonata;Aeshna cyanea;NA;0.076;Aeshna cyanea;0.999982542263032;  
MW490430;Odonata;Erythromma najas;Erythromma najas;1;Erythromma najas;1;  
MW490431;Odonata;Pyrrhosoma nymphula;Pyrrhosoma nymphula;NA;Pyrrhosoma  
nymphula;0.999999942969994;  
MW490432;Odonata;Calopteryx splendens;NA;0.319;Calopteryx splendens;0.902201516099146;  
MW490433;Odonata;Calopteryx splendens;NA;NA;NA;1;  
MW490434;Odonata;Ischnura elegans;NA;0.009;Ischnura elegans;0.998286798796293;  
MW490435;Odonata;Nehalennia speciosa;Nehalennia speciosa;1;Nehalennia speciosa;1;  
MW490437;Odonata;Coenagrion puella;NA;0.276;NA;100.000.000.000.001;  
MW490442;Odonata;Coenagrion puella;NA;0.074;NA;0.999999999999997;  
MW490443;Odonata;Leucorrhinia pectoralis;Leucorrhinia pectoralis;1;Leucorrhinia  
pectoralis;0.999999999995623;  
MW490444;Odonata;Sympetrum fonscolombii;Sympetrum fonscolombii;1;Sympetrum fonscolombii;1;  
MW490445;Odonata;Ischnura elegans;NA;0.001;Ischnura elegans;0.998258473292383;  
MW490447;Odonata;Coenagrion puella;NA;0.074;NA;0.999999999999997;  
MW490448;Odonata;Aeshna juncea;NA;0.007;Aeshna juncea;0.99998063330467;  
MW490449;Odonata;Platycnemis pennipes;Platycnemis pennipes;1;Platycnemis pennipes;1;  
MW490450;Odonata;Aeshna subarctica;NA;0.007;Aeshna subarctica;0.999961822363128;  
MW490451;Odonata;Anax parthenope;NA;0.039;Anax parthenope;0.926670754433644;  
MW490453;Odonata;Gomphus vulgatissimus;Gomphus vulgatissimus;0.038;Gomphus  
vulgatissimus;0.999958376398005;  
MW490454;Odonata;Coenagrion puella;NA;0.202;NA;100.000.000.000.001;  
MW490456;Odonata;Ischnura elegans;NA;0.043;Ischnura elegans;0.978864384472458;  
MW490457;Odonata;Sympecma fusca;Sympecma fusca;NA;Sympecma fusca;1;  
MW490458;Odonata;Erythromma najas;Erythromma najas;1;Erythromma najas;1;  
MW490459;Odonata;Ischnura elegans;NA;0.039;Ischnura elegans;0.998948833724917;  
MW490460;Odonata;Enallagma cyathigerum;NA;0.004;Enallagma cyathigerum;0.995692375934099;  
MW490461;Odonata;Somatochlora flavomaculata;Somatochlora flavomaculata;1;Somatochlora  
flavomaculata;0.9999999999994799;  
MW490462;Odonata;Sympetrum vulgatum;Sympetrum vulgatum;1;Sympetrum vulgatum;1;  
MW490463;Odonata;Ischnura elegans;NA;0.011;Ischnura elegans;0.998617436138977;  
MW490464;Odonata;Anax imperator;NA;0.001;Anax parthenope;0.831612174742639;  
MW490465;Odonata;Pyrrhosoma nymphula;Pyrrhosoma nymphula;NA;Pyrrhosoma  
nymphula;0.999999612176073;  
MW490466;Odonata;Anax imperator;NA;0.004;Anax parthenope;0.781168777604321;  
MW490468;Odonata;Ischnura elegans;NA;0.011;Ischnura elegans;0.998617436138977;  
MW490470;Odonata;Sympecma paedisca;Sympecma paedisca;1;Sympecma paedisca;1;  
MW490473;Odonata;Orthetrum coerulescens;Orthetrum coerulescens;1;Orthetrum  
coerulescens;0.999999999999972;  
MW490474;Odonata;Sympecma fusca;Sympecma fusca;NA;Sympecma fusca;1;  
MW490475;Odonata;Aeshna affinis;Aeshna affinis;1;Aeshna affinis;1;  
MW490476;Odonata;Sympetrum sanguineum;Sympetrum sanguineum;1;Sympetrum sanguineum;1;  
MW490477;Odonata;Aeshna juncea;NA;0.001;Aeshna juncea;0.998128352518488;

MW490478;Odonata;Sympetrum sanguineum;Sympetrum sanguineum;1;Sympetrum sanguineum;1;  
 MW490481;Odonata;Aeshna subarctica;NA;0.002;Aeshna subarctica;0.999955531237761;  
 MW490483;Odonata;Leucorrhinia dubia;NA;0.013;Leucorrhinia dubia;0.999999620968752;  
 MW490485;Odonata;Erythromma najas;Erythromma najas;1;Erythromma najas;1;  
 MW490487;Odonata;Calopteryx splendens;NA;0.245;Calopteryx splendens;0.875583671449949;  
 MW490490;Odonata;Anax imperator;NA;0.001;Anax parthenope;0.816315564459247;  
 MW490493;Odonata;Coenagrion pulchellum;NA;NA;NA;1;  
 MW490494;Odonata;Platycnemis pennipes;Platycnemis pennipes;1;Platycnemis pennipes;1;  
 MW490495;Odonata;Aeshna affinis;Aeshna affinis;1;Aeshna affinis;1;  
 MW490497;Odonata;Sympecma fusca;Sympecma fusca;1;Sympecma fusca;1;  
 MW490498;Odonata;Coenagrion puella;NA;0.074;NA;100.000.000.000.001;  
 MW490499;Odonata;Pyrrhosoma nymphula;Pyrrhosoma nymphula;NA;Pyrrhosoma nymphula;0.99999954931696;  
 MW490500;Odonata;Leucorrhinia pectoralis;Leucorrhinia pectoralis;1;Leucorrhinia pectoralis;0.999999999987011;  
 MW490501;Odonata;Ischnura elegans;NA;0.001;Ischnura elegans;0.97565376585323;  
 MW490502;Odonata;Brachytron pratense;Brachytron pratense;1;Brachytron pratense;0.99999999928349;  
 MW490503;Odonata;Enallagma cyathigerum;NA;0.014;Enallagma cyathigerum;0.994708161792147;  
 MW490504;Odonata;Pyrrhosoma nymphula;Pyrrhosoma nymphula;NA;Pyrrhosoma nymphula;0.99999942969994;  
 MW490505;Odonata;Ophiogomphus cecilia;Ophiogomphus cecilia;1;Ophiogomphus cecilia;0.99999987528241;  
 MW490506;Odonata;Orthetrum cancellatum;Orthetrum cancellatum;1;Orthetrum cancellatum;0.99999999911495;  
 MW490507;Odonata;Enallagma cyathigerum;NA;NA;Enallagma cyathigerum;0.996111822348913;  
 MW490508;Odonata;Orthetrum coerulescens;Orthetrum coerulescens;1;Orthetrum coerulescens;0.99999999999972;  
 MW490509;Odonata;Anax imperator;NA;0.002;Anax parthenope;0.806952592373366;  
 MW490510;Odonata;Calopteryx splendens;NA;0.319;Calopteryx splendens;0.902201516099146;  
 MW490511;Odonata;Nehalennia speciosa;Nehalennia speciosa;1;Nehalennia speciosa;1;  
 MW490512;Odonata;Enallagma cyathigerum;NA;0.005;Enallagma cyathigerum;0.994078987075013;  
 MW490513;Odonata;Enallagma cyathigerum;NA;NA;Enallagma cyathigerum;0.997312671813944;  
 MW490514;Odonata;Platycnemis pennipes;Platycnemis pennipes;1;Platycnemis pennipes;1;  
 MW490515;Odonata;Ischnura elegans;NA;0.001;Ischnura elegans;0.998258473292383;  
 MW490516;Odonata;Sympetrum sanguineum;Sympetrum sanguineum;1;Sympetrum sanguineum;1;  
 MW490517;Odonata;Aeshna grandis;Aeshna grandis;1;Aeshna grandis;0.999995844820084;  
 MW490518;Odonata;Erythromma najas;Erythromma najas;1;Erythromma najas;1;  
 MW490520;Odonata;Orthetrum coerulescens;Orthetrum coerulescens;1;Orthetrum coerulescens;0.99999999999972;  
 MW490521;Odonata;Aeshna isoceles;Aeshna isoceles;1;Aeshna isoceles;0.999999999984396;  
 MW490524;Odonata;Coenagrion puella;NA;NA;NA;0.99999999999986;  
 MW490525;Odonata;Orthetrum coerulescens;Orthetrum coerulescens;1;Orthetrum coerulescens;0.99999999999915;  
 MW490527;Odonata;Somatochlora arctica;Somatochlora arctica;1;Somatochlora arctica;0.999997548172438;  
 MW490528;Odonata;Enallagma cyathigerum;NA;0.006;Enallagma cyathigerum;0.989654720690281;  
 MW490530;Odonata;Gomphus vulgatissimus;Gomphus vulgatissimus;0.001;Gomphus vulgatissimus;0.999996732725458;  
 MW490531;Odonata;Sympetrum danae;Sympetrum danae;1;Sympetrum danae;0.99999999999972;  
 MW490533;Odonata;Crocothemis erythraea;Crocothemis erythraea;0.004;Crocothemis erythraea;0.99999894641183;  
 MW490534;Odonata;Lestes virens;Lestes virens;1;Lestes virens;1;  
 MW490535;Odonata;Enallagma cyathigerum;NA;0.004;Enallagma cyathigerum;0.995859129090957;  
 MW490536;Odonata;Erythromma viridulum;Erythromma viridulum;1;Erythromma viridulum;1;  
 MW490537;Odonata;Enallagma cyathigerum;NA;0.004;Enallagma cyathigerum;0.995692375934099;  
 MW490538;Odonata;Aeshna grandis;Aeshna grandis;0.002;Aeshna grandis;0.999972928595749;  
 MW490539;Odonata;Aeshna cyanea;NA;0.076;Aeshna cyanea;0.999982542263032;  
 MW490541;Odonata;Leucorrhinia dubia;NA;0.013;Leucorrhinia dubia;0.99999814503968;  
 MW490542;Odonata;Libellula quadrimaculata;Libellula quadrimaculata;1;Libellula quadrimaculata;1;  
 MW490543;Odonata;Sympetrum vulgatum;Sympetrum vulgatum;1;Sympetrum vulgatum;1;  
 MW490544;Odonata;Epithea bimaculata;Epithea bimaculata;1;Epithea bimaculata;1;  
 MW490545;Odonata;Gomphus vulgatissimus;Gomphus vulgatissimus;0.002;Gomphus vulgatissimus;0.999995638523548;  
 MW490547;Odonata;Erythromma najas;Erythromma najas;1;Erythromma najas;1;  
 MW490548;Odonata;Enallagma cyathigerum;NA;NA;Enallagma cyathigerum;0.998174203320508;  
 MW490550;Odonata;Enallagma cyathigerum;NA;0.014;Enallagma cyathigerum;0.994708161792147;  
 MW490552;Odonata;Lestes virens;Lestes virens;1;Lestes virens;1;  
 MW490553;Odonata;Coenagrion puella;NA;0.202;NA;100.000.000.000.001;  
 MW490555;Odonata;Orthetrum cancellatum;Orthetrum cancellatum;1;Orthetrum cancellatum;0.99999999999375;  
 MW490556;Odonata;Lestes virens;Lestes virens;1;Lestes virens;1;  
 MW490557;Odonata;Enallagma cyathigerum;NA;0.006;Enallagma cyathigerum;0.994128000411538;  
 MW490559;Odonata;Sympetrum meridionale;NA;NA;Sympetrum meridionale;0.99999999999972;  
 MW490560;Odonata;Sympecma paedisca;Sympecma paedisca;NA;Sympecma paedisca;1;  
 MW490561;Odonata;Lestes virens;Lestes virens;1;Lestes virens;1;  
 MW490562;Odonata;Coenagrion puella;NA;0.202;NA;100.000.000.000.001;  
 MW490563;Odonata;Nehalennia speciosa;Nehalennia speciosa;1;Nehalennia speciosa;1;

MW490564;Odonata;Libellula quadrimaculata;Libellula quadrimaculata;1;Libellula quadrimaculata;1;  
MW490565;Odonata;Crocothemis erythraea;Crocothemis erythraea;1;Crocothemis  
erythraea;0.999999995716564;  
MW490566;Odonata;Lestes virens;Lestes virens;1;Lestes virens;1;  
MW490567;Odonata;Ischnura elegans;NA;NA;Ischnura elegans;0.992662849927982;  
MW509062;Odonata;Ischnura elegans;NA;0.043;Ischnura elegans;0.935902216157567;  
MW509063;Odonata;Ischnura elegans;NA;0.024;Ischnura elegans;0.975294511337951;  
MW509064;Odonata;Ischnura elegans;NA;0.024;Ischnura elegans;0.975294511337951;  
MW509065;Odonata;Ischnura elegans;NA;0.007;Ischnura elegans;0.95835303603154;  
MW570923;Odonata;Gomphus flavipes;Stylurus flavipes;1;Stylurus flavipes;0.99999999934829;  
MW570924;Odonata;Gomphus flavipes;Stylurus flavipes;1;Stylurus flavipes;0.99999999934829;  
MW570925;Odonata;Gomphus flavipes;Stylurus flavipes;1;Stylurus flavipes;0.99999999968281;  
MW570933;Odonata;Gomphus vulgatissimus;Gomphus vulgatissimus;0.008;Gomphus  
vulgatissimus;0.994629140275637;  
MW570934;Odonata;Gomphus vulgatissimus;NA;0.086;Gomphus vulgatissimus;0.979361164418941;  
MW570935;Odonata;Gomphus vulgatissimus;Gomphus vulgatissimus;0.008;Gomphus  
vulgatissimus;0.994629140275637;  
MW570947;Odonata;Ophiogomphus cecilia;Ophiogomphus cecilia;1;Ophiogomphus  
cecilia;0.999999998959595;  
MW570948;Odonata;Ophiogomphus cecilia;Ophiogomphus cecilia;1;Ophiogomphus  
cecilia;0.999999998256214;  
MW570956;Odonata;Paragomphus genei;Paragomphus genei;1;Paragomphus genei;1;  
MW570957;Odonata;Paragomphus genei;Paragomphus genei;1;Paragomphus genei;1;  
MW570958;Odonata;Paragomphus genei;Paragomphus genei;1;Paragomphus genei;1;  
MW570961;Odonata;Lindenia tetraphylla;Lindenia tetraphylla;NA;Lindenia tetraphylla;1;  
MZ656887;Odonata;Sympetrum flaveolum;Sympetrum flaveolum;1;Sympetrum flaveolum;1;  
MZ656916;Odonata;Leucorrhinia dubia;Leucorrhinia dubia;0.002;Leucorrhinia  
dubia;0.999999753748144;  
MZ657202;Odonata;Ischnura pumilio;Ischnura pumilio;1;Ischnura pumilio;1;  
MZ657323;Odonata;Ischnura elegans;NA;0.001;Ischnura elegans;0.998258473292383;  
MZ657522;Odonata;Aeshna juncea;NA;0.024;Aeshna juncea;0.999937379561046;  
MZ657877;Odonata;Erythromma najas;Erythromma najas;1;Erythromma najas;1;  
MZ658275;Odonata;Enallagma cyathigerum;NA;0.003;Enallagma cyathigerum;0.995934427215558;  
MZ658790;Odonata;Enallagma cyathigerum;NA;0.002;Enallagma cyathigerum;0.995655573434831;  
MZ658835;Odonata;Aeshna mixta;Aeshna mixta;1;Aeshna mixta;0.99999999968765;  
MZ658871;Odonata;Aeshna subarctica;Aeshna subarctica;1;Aeshna subarctica;0.999961546213885;  
MZ658943;Odonata;Sympetrum flaveolum;Sympetrum flaveolum;1;Sympetrum flaveolum;1;  
MZ659209;Odonata;Aeshna grandis;Aeshna grandis;1;Aeshna grandis;0.999979070428973;  
MZ659561;Odonata;Coenagrion puella;NA;0.286;NA;100.000.000.000.001;  
MZ659598;Odonata;Aeshna subarctica;NA;0.002;Aeshna subarctica;0.999967625499776;  
MZ659610;Odonata;Aeshna grandis;Aeshna grandis;0.003;Aeshna grandis;0.99999289563942;  
MZ659720;Odonata;Aeshna cyanea;NA;0.076;Aeshna cyanea;0.999982542263032;  
MZ660159;Odonata;Aeshna grandis;Aeshna grandis;0.001;Aeshna grandis;0.999985549759727;  
MZ660337;Odonata;Aeshna cyanea;NA;0.076;Aeshna cyanea;0.999982542263032;  
MZ660509;Odonata;Aeshna cyanea;NA;0.076;Aeshna cyanea;0.999982542263032;  
MZ660534;Odonata;Coenagrion puella;NA;0.202;NA;100.000.000.000.001;  
MZ660751;Odonata;Sympetrum vulgatum;Sympetrum vulgatum;1;Sympetrum vulgatum;1;  
MZ660783;Odonata;Coenagrion puella;NA;0.215;NA;1;  
MZ660814;Odonata;Aeshna juncea;NA;0.014;Aeshna juncea;0.999945275608447;  
MZ660966;Odonata;Enallagma cyathigerum;NA;0.002;Enallagma cyathigerum;0.995455145792239;  
NC\_031824;Odonata;Ischnura elegans;NA;0.007;Ischnura saharensis;0.805482303179156;  
OM089771;Odonata;Aeshna mixta;Aeshna mixta;1;Aeshna mixta;0.999999792027687;  
OM089772;Odonata;Aeshna mixta;Aeshna mixta;1;Aeshna mixta;0.99999993205336;  
OM089773;Odonata;Aeshna mixta;Aeshna mixta;0.998;Aeshna mixta;0.999999859005708;  
OM089774;Odonata;Aeshna mixta;Aeshna mixta;1;Aeshna mixta;0.99999993205336;  
OM089775;Odonata;Aeshna mixta;Aeshna mixta;1;Aeshna mixta;0.99999996456182;  
OM089776;Odonata;Aeshna mixta;Aeshna mixta;0.995;Aeshna mixta;0.999999841334512;  
ON003482;Odonata;Leucorrhinia dubia;Leucorrhinia dubia;0.005;Leucorrhinia  
intermedia;0.990425291411556;  
ON003483;Odonata;Leucorrhinia dubia;Leucorrhinia dubia;0.002;Leucorrhinia  
intermedia;0.997118875790847;  
ON003484;Odonata;Leucorrhinia dubia;Leucorrhinia dubia;0.971;Leucorrhinia  
intermedia;0.998130704151497;  
ON003485;Odonata;Leucorrhinia dubia;Leucorrhinia dubia;0.001;Leucorrhinia  
intermedia;0.996930028119367;  
OP913230;Odonata;Ischnura elegans;NA;0.007;Ischnura elegans;0.997583279962887;  
SBAM011-22;Odonata;Orthetrum brunneum;NA;0.007;Orthetrum brunneum;0.998356682444039;  
UKAN811-22;Odonata;Aeshna caerulea;NA;0.001;Aeshna septentrionalis;0.913094945136716;  
UKAN813-22;Odonata;Libellula fulva;Libellula fulva;1;Libellula fulva;1;
